# Supplementary material for: Functional development of a V3/glycan-specific broadly neutralizing antibody isolated from a case of HIV superinfection
Source: eLife journal article supplement (doi:10.7554/elife.68110), 2021-07-15
Supplement: fig2-data2 [file RawData0.xls]

A9		B9		C9		D9		E9		F9		G9		H9		A10		B10		C10		D10		E10		F10		G10		H10
0	0	0	0	0	0	0	0	0	0	0	0	0	0	0	0	0	0	0	0	0	0	0	0	0	0	0	0	0	0	0	0
0.2	-0.00369583	0.2	0.0005984	0.2	-0.0000666	0.2	-0.00054666	0.2	0.00636359	0.2	-0.00197374	0.2	0.00278891	0.2	-0.00102973	0.2	-0.0045227	0.2	0.00190067	0.2	0.00087991	0.2	-0.00126969	0.2	-0.00795536	0.2	0.00360875	0.2	0.00001201	0.2	0.00120284
0.4	-0.00361926	0.4	0.00470576	0.4	-0.00541365	0.4	0.00418771	0.4	0.00293477	0.4	0.00387573	0.4	0.00087659	0.4	-0.00074829	0.4	0.00326378	0.4	-0.00098979	0.4	-0.00112974	0.4	-0.00281429	0.4	-0.00695659	0.4	0.00418096	0.4	0.001156	0.4	0.00395853
0.6	0.00237312	0.6	0.000425	0.6	0.00364182	0.6	0.00402296	0.6	0.00091009	0.6	0.00290324	0.6	0.00625473	0.6	0.00334619	0.6	0.00370075	0.6	-0.00151837	0.6	-0.00248735	0.6	-0.00059005	0.6	-0.00480438	0.6	0.00482138	0.6	-0.00160448	0.6	0.0032895
0.8	0.00329456	0.8	0.00364776	0.8	0.0006341	0.8	0.00361948	0.8	0.0079241	0.8	0.00422565	0.8	0.00799144	0.8	0.00097276	0.8	0.00292784	0.8	0.00204994	0.8	0.00145105	0.8	-0.00132383	0.8	-0.00535753	0.8	0.00642098	0.8	0.00325961	0.8	0.00403553
1	0.00398782	1	0.00021346	1	0.00455832	1	0.00931831	1	0.00385284	1	0.00550821	1	0.0086132	1	0.00065449	1	0.00387795	1	0.00479867	1	0.00198269	1	0.0010944	1	-0.00753451	1	0.00420902	1	0.0064766	1	-0.00089515
1.2	0.00189888	1.2	0.00132876	1.2	0.00656917	1.2	0.00334983	1.2	0.00550307	1.2	0.00415658	1.2	0.00570993	1.2	0.00843861	1.2	0.00505581	1.2	0.00294435	1.2	0.00215701	1.2	0.00143426	1.2	-0.006509	1.2	0.00782323	1.2	0.0046953	1.2	0.00138927
1.4	0.00434774	1.4	0.00277694	1.4	0.0056644	1.4	0.01347392	1.4	0.00524418	1.4	0.0036416	1.4	0.00557458	1.4	0.00369537	1.4	0.001872	1.4	0.0090829	1.4	0.00105005	1.4	0.0011767	1.4	0.00072681	1.4	0.00643416	1.4	0.0036853	1.4	0.00748365
1.6	0.00056399	1.6	0.00744138	1.6	0.00551887	1.6	0.00528012	1.6	0.00653151	1.6	0.00684641	1.6	0.01069246	1.6	0.00692267	1.6	0.00173578	1.6	0.00905753	1.6	0.0011743	1.6	0.00004446	1.6	-0.00176907	1.6	0.00601504	1.6	-0.00083537	1.6	0.0082019
1.8	0.00251327	1.8	0.00683088	1.8	0.00288748	1.8	0.0087985	1.8	0.00831245	1.8	0.00814197	1.8	0.00888443	1.8	0.00898879	1.8	0.00991216	1.8	0.00757004	1.8	0.00115133	1.8	0.00391898	1.8	-0.00283984	1.8	0.00896794	1.8	0.00421302	1.8	0.00961298
2	0.00795766	2	0.00434446	2	0.00336294	2	0.01040205	2	0.00688095	2	0.00950921	2	0.0112327	2	0.01613984	2	0.00757987	2	0.00875089	2	0.00377066	2	0.00367226	2	-0.00297746	2	0.00936577	2	0.00420454	2	0.00477627
2.2	0.00178377	2.2	0.00511003	2.2	-0.00078312	2.2	0.00688877	2.2	0.00710393	2.2	0.01010917	2.2	0.00729497	2.2	0.00719734	2.2	0.00906434	2.2	0.00781076	2.2	0.00040672	2.2	0.005228	2.2	-0.0055003	2.2	0.0052411	2.2	0.00907433	2.2	0.01063637
2.4	0.00266829	2.4	0.00603366	2.4	0.00388812	2.4	0.00755061	2.4	0.00838991	2.4	0.01018249	2.4	0.00940402	2.4	0.00827392	2.4	0.00727475	2.4	0.01136788	2.4	0.00791119	2.4	0.00362073	2.4	-0.00244711	2.4	0.00926665	2.4	0.00699	2.4	0.0058241
2.6	0.00851311	2.6	0.01001516	2.6	0.00692117	2.6	0.00693707	2.6	0.00803775	2.6	0.0143473	2.6	0.01425917	2.6	0.01035217	2.6	0.0073544	2.6	0.012363	2.6	0.00664295	2.6	0.0019953	2.6	-0.00189112	2.6	0.00736958	2.6	0.00352224	2.6	0.00863841
2.8	0.00802273	2.8	0.0036459	2.8	0.00743541	2.8	0.00881993	2.8	0.00866503	2.8	0.00848277	2.8	0.00955883	2.8	0.00404881	2.8	0.00398647	2.8	0.01147302	2.8	0.00656628	2.8	-0.00217406	2.8	-0.00373241	2.8	0.00566062	2.8	0.00610172	2.8	0.00999927
3	0.00584112	3	0.00907057	3	0.00866259	3	0.00671847	3	0.0099501	3	0.01029642	3	0.00831024	3	0.0094422	3	0.00541067	3	0.00660591	3	0.00865425	3	0.00183442	3	-0.00341783	3	0.00855898	3	0.00244083	3	0.00480115
3.2	0.00634304	3.2	0.00858852	3.2	0.00791013	3.2	0.00653475	3.2	0.00990473	3.2	0.004139	3.2	0.00933157	3.2	0.00621458	3.2	0.01090127	3.2	0.00613401	3.2	0.00959595	3.2	0.00622144	3.2	-0.00269362	3.2	0.0094532	3.2	0.01351422	3.2	0.00667203
3.4	0.00312606	3.4	0.00907322	3.4	0.00984417	3.4	0.00947515	3.4	0.00809164	3.4	0.01145779	3.4	0.01591851	3.4	0.00808137	3.4	0.01102474	3.4	0.01256584	3.4	0.00568794	3.4	0.00510314	3.4	0.00004769	3.4	0.0096223	3.4	0.00710281	3.4	0.00903276
3.6	0.00809461	3.6	0.00806198	3.6	0.00949788	3.6	0.01428374	3.6	0.01237463	3.6	0.01004739	3.6	0.01040976	3.6	0.00611901	3.6	0.00629383	3.6	0.01126984	3.6	0.00841774	3.6	0.00310208	3.6	-0.0016076	3.6	0.00990575	3.6	0.00687521	3.6	0.01121117
3.8	0.01102602	3.8	0.01075633	3.8	0.00924886	3.8	0.00666039	3.8	0.00862911	3.8	0.01016905	3.8	0.01631026	3.8	0.0091065	3.8	0.00512539	3.8	0.01145207	3.8	0.00194467	3.8	0.00584019	3.8	0.00036927	3.8	0.01168084	3.8	0.00723006	3.8	0.01577392
4	0.00770664	4	0.0108203	4	0.00809272	4	0.00954921	4	0.01411901	4	0.00869682	4	0.01303073	4	0.00730587	4	0.00753618	4	0.00972411	4	0.00846835	4	0.00339536	4	-0.00083531	4	0.00800507	4	0.00566402	4	0.00906478
4.2	0.01027259	4.2	0.01009133	4.2	0.00447903	4.2	0.01415193	4.2	0.01053942	4.2	0.01282145	4.2	0.0129334	4.2	0.00806999	4.2	0.0092496	4.2	0.00895291	4.2	0.00823976	4.2	0.01121793	4.2	0.00320539	4.2	0.01075934	4.2	0.00787104	4.2	0.00628677
4.4	0.00436507	4.4	0.00832978	4.4	0.01028696	4.4	0.00890783	4.4	0.01320797	4.4	0.00768854	4.4	0.00775845	4.4	0.00932562	4.4	0.00845285	4.4	0.0132622	4.4	0.00510568	4.4	0.01003901	4.4	0.00226253	4.4	0.00850311	4.4	0.01165725	4.4	0.01045781
4.6	0.01008347	4.6	0.00568205	4.6	0.00750992	4.6	0.01388607	4.6	0.016785	4.6	0.00974023	4.6	0.01181549	4.6	0.00445702	4.6	0.01062557	4.6	0.01382485	4.6	0.0075944	4.6	0.00988302	4.6	0.00641725	4.6	0.01328859	4.6	0.0106467	4.6	0.01134557
4.8	0.00916748	4.8	0.00795487	4.8	0.00857979	4.8	0.01347606	4.8	0.01233265	4.8	0.01145303	4.8	0.00978344	4.8	0.01048527	4.8	0.00816275	4.8	0.0125793	4.8	0.01044041	4.8	0.00594049	4.8	-0.00037329	4.8	0.01016985	4.8	0.00656422	4.8	0.01286461
5	0.00566032	5	0.00877964	5	0.00983339	5	0.01298028	5	0.01309812	5	0.00628166	5	0.01159471	5	0.00980758	5	0.0099843	5	0.01316715	5	0.0077985	5	0.00608309	5	0.00144403	5	0.01258793	5	0.00611116	5	0.01363134
5.2	0.00808436	5.2	0.01014665	5.2	0.00937263	5.2	0.0112576	5.2	0.01026649	5.2	0.01079378	5.2	0.01530073	5.2	0.01189267	5.2	0.01080134	5.2	0.01067059	5.2	0.01095012	5.2	0.01316342	5.2	-0.00106395	5.2	0.0154322	5.2	0.01126536	5.2	0.00942673
5.4	0.00941398	5.4	0.01117656	5.4	0.01104097	5.4	0.01529467	5.4	0.0145071	5.4	0.01455458	5.4	0.01307027	5.4	0.01249562	5.4	0.00623968	5.4	0.00977629	5.4	0.01090246	5.4	0.00924525	5.4	0.00369028	5.4	0.01662575	5.4	0.01155646	5.4	0.01426078
5.6	0.00797317	5.6	0.00847556	5.6	0.01119899	5.6	0.01573289	5.6	0.01098584	5.6	0.00999646	5.6	0.01128749	5.6	0.00998967	5.6	0.01005738	5.6	0.01106836	5.6	0.00449383	5.6	0.01219551	5.6	0.00287796	5.6	0.01463667	5.6	0.00322254	5.6	0.00971533
5.8	0.00553817	5.8	0.00763286	5.8	0.00923818	5.8	0.01183463	5.8	0.00953931	5.8	0.0140538	5.8	0.01252714	5.8	0.00769319	5.8	0.01371925	5.8	0.01385762	5.8	0.01133992	5.8	0.00930193	5.8	0.0008995	5.8	0.01201731	5.8	0.01005689	5.8	0.01236994
6	0.00668122	6	0.00956455	6	0.01297644	6	0.01484494	6	0.01008046	6	0.00872726	6	0.01468462	6	0.01395829	6	0.01267228	6	0.01572921	6	0.00953879	6	0.00561476	6	0.00086801	6	0.01788014	6	0.01141525	6	0.00912042
6.2	0.00840373	6.2	0.00854224	6.2	0.01221883	6.2	0.01633893	6.2	0.01581698	6.2	0.01460084	6.2	0.01207611	6.2	0.01067955	6.2	0.01094441	6.2	0.00883863	6.2	0.01258076	6.2	0.01305509	6.2	0.00334606	6.2	0.01395155	6.2	0.01148114	6.2	0.01332804
6.4	0.00730657	6.4	0.00886341	6.4	0.00994621	6.4	0.01359404	6.4	0.01425655	6.4	0.01073392	6.4	0.01366812	6.4	0.01470748	6.4	0.0140424	6.4	0.01152359	6.4	0.00994192	6.4	0.00686547	6.4	0.00139944	6.4	0.0094992	6.4	0.00874053	6.4	0.0121477
6.6	0.00851141	6.6	0.00790567	6.6	0.00935403	6.6	0.0166368	6.6	0.01175398	6.6	0.00765916	6.6	0.01381759	6.6	0.00895117	6.6	0.0121684	6.6	0.01713241	6.6	0.01419046	6.6	0.01088328	6.6	0.00403703	6.6	0.01244413	6.6	0.0130428	6.6	0.01353559
6.8	0.00548997	6.8	0.00833461	6.8	0.01091547	6.8	0.01152247	6.8	0.01484185	6.8	0.0102483	6.8	0.01299046	6.8	0.00871768	6.8	0.01058321	6.8	0.01342977	6.8	0.01136069	6.8	0.00560874	6.8	-0.0010508	6.8	0.01360636	6.8	0.01028071	6.8	0.01362071
7	0.01281807	7	0.01496272	7	0.01190222	7	0.01363972	7	0.01449904	7	0.0134779	7	0.0089655	7	0.01234959	7	0.01141143	7	0.01580058	7	0.00684809	7	0.00839276	7	0.00289644	7	0.01858719	7	0.01472006	7	0.01314277
7.21	0.01101964	7.21	0.00947574	7.21	0.00977863	7.21	0.01757956	7.21	0.01544715	7.21	0.01235993	7.21	0.01897269	7.21	0.01204595	7.2	0.01227957	7.2	0.01056975	7.2	0.00715993	7.2	0.00834613	7.2	0.00387019	7.2	0.01902539	7.2	0.00641776	7.2	0.01564611
7.4	0.0089027	7.4	0.0085724	7.4	0.01005185	7.4	0.01496765	7.4	0.01171091	7.4	0.00888357	7.4	0.01523474	7.4	0.01068237	7.4	0.00963611	7.4	0.01513425	7.4	0.01548496	7.4	0.00658223	7.4	0.00493592	7.4	0.01430734	7.4	0.01063138	7.4	0.01072405
7.6	0.00839151	7.6	0.00950551	7.6	0.0106342	7.6	0.01564998	7.6	0.01447203	7.6	0.01295653	7.6	0.0112471	7.6	0.01295011	7.6	0.01511604	7.6	0.01416019	7.6	0.01357315	7.6	0.00665975	7.6	-0.00110824	7.6	0.01874768	7.6	0.01023681	7.6	0.00778399
7.8	0.01148408	7.8	0.01250987	7.8	0.00975041	7.8	0.01616995	7.8	0.01332724	7.8	0.01090665	7.8	0.01504938	7.8	0.00916909	7.8	0.00887136	7.8	0.01275054	7.8	0.01044409	7.8	0.00682039	7.8	0.00483706	7.8	0.01447688	7.8	0.01007663	7.8	0.00820238
8	0.00811436	8	0.013163	8	0.00954092	8	0.01409997	8	0.01477264	8	0.01278083	8	0.01269265	8	0.01698341	8	0.016843	8	0.01184763	8	0.01207872	8	0.01122003	8	0.00938934	8	0.01204193	8	0.01198909	8	0.01534865
8.2	0.01491821	8.2	0.01536392	8.2	0.01245648	8.2	0.01397988	8.2	0.0136816	8.2	0.01527298	8.2	0.01618244	8.2	0.01168325	8.2	0.01592079	8.2	0.01100686	8.2	0.01471671	8.2	0.01004324	8.2	0.00399292	8.2	0.01665431	8.2	0.00918506	8.2	0.01544377
8.4	0.00737885	8.4	0.01153943	8.4	0.0183614	8.4	0.01529942	8.4	0.01286116	8.4	0.01841617	8.4	0.01606884	8.4	0.01195359	8.4	0.01040019	8.4	0.01936818	8.4	0.00900391	8.4	0.01116758	8.4	0.0065145	8.4	0.01596464	8.4	0.01360506	8.4	0.00501529
8.6	0.01153979	8.6	0.00768491	8.6	0.01034343	8.6	0.01863372	8.6	0.01239849	8.6	0.01879685	8.6	0.01900737	8.6	0.01412223	8.6	0.01403385	8.6	0.01382472	8.6	0.01202952	8.6	0.01164746	8.6	-0.00188395	8.6	0.01828452	8.6	0.01146431	8.6	0.00950785
8.8	0.00901909	8.8	0.00931367	8.8	0.01351773	8.8	0.0179223	8.8	0.01363404	8.8	0.01361788	8.8	0.01210757	8.8	0.01076543	8.8	0.01067052	8.8	0.01268699	8.8	0.01169073	8.8	0.00848514	8.8	0.00565326	8.8	0.01387869	8.8	0.01584423	8.8	0.01637756
9	0.01179545	9	0.00778559	9	0.01721008	9	0.01425453	9	0.01376789	9	0.01335025	9	0.01609565	9	0.01242185	9	0.0144797	9	0.01756898	9	0.0144665	9	0.01405087	9	0.00447421	9	0.02160251	9	0.0104997	9	0.01544796
9.2	0.00965982	9.2	0.00565514	9.2	0.01815134	9.2	0.01845036	9.2	0.00821086	9.2	0.01459708	9.2	0.01674321	9.2	0.00995016	9.2	0.01481203	9.2	0.01640354	9.2	0.01168988	9.2	0.01388466	9.2	0.00577637	9.2	0.01617451	9.2	0.0153427	9.2	0.01260302
9.4	0.01315993	9.4	0.00958656	9.4	0.00968215	9.4	0.01600207	9.4	0.01729325	9.4	0.01429344	9.4	0.01741209	9.4	0.01704942	9.4	0.01152228	9.4	0.01390272	9.4	0.0144538	9.4	0.01189166	9.4	0.00259092	9.4	0.01771306	9.4	0.01393402	9.4	0.01308234
9.6	0.01189976	9.6	0.0099093	9.6	0.01465212	9.6	0.01450296	9.6	0.01115914	9.6	0.01377216	9.6	0.01244885	9.6	0.01348037	9.6	0.01272192	9.6	0.01833813	9.6	0.01333359	9.6	0.01078151	9.6	0.00532741	9.6	0.01734936	9.6	0.00678595	9.6	0.01075588
9.8	0.00598018	9.8	0.00672624	9.8	0.01378335	9.8	0.01927545	9.8	0.0144603	9.8	0.01583285	9.8	0.01627913	9.8	0.01065538	9.8	0.01742202	9.8	0.01764276	9.8	0.0116596	9.8	0.01460009	9.8	0.00610333	9.8	0.01721475	9.8	0.01275877	9.8	0.01325361
10	0.0109303	10	0.00997526	10	0.01370002	10	0.0195295	10	0.01251338	10	0.01656738	10	0.01643472	10	0.01440452	10	0.01672532	10	0.01005434	10	0.01249728	10	0.01483449	10	0.00702558	10	0.01458205	10	0.01377071	10	0.00927527
10.2	0.00997988	10.2	0.0104817	10.2	0.01217266	10.2	0.01731343	10.2	0.01911093	10.2	0.01339539	10.2	0.01255324	10.2	0.00775746	10.2	0.01950167	10.2	0.01413507	10.2	0.01282861	10.2	0.0052009	10.2	0.00081292	10.2	0.01605403	10.2	0.01359739	10.2	0.00901732
10.4	0.01329949	10.4	0.01354003	10.4	0.01303838	10.4	0.01803764	10.4	0.0150233	10.4	0.01967852	10.4	0.01728208	10.4	0.0146914	10.4	0.01744048	10.4	0.0180383	10.4	0.01774537	10.4	0.01314491	10.4	0.00448313	10.4	0.01659244	10.4	0.01355417	10.4	0.01607628
10.6	0.01161937	10.6	0.01121375	10.6	0.01213463	10.6	0.01797091	10.6	0.01268226	10.6	0.01739875	10.6	0.01506668	10.6	0.01424272	10.6	0.01345489	10.6	0.01660515	10.6	0.0165655	10.6	0.00827905	10.6	0.00528724	10.6	0.01816349	10.6	0.01437716	10.6	0.01255462
10.8	0.00882409	10.8	0.01707696	10.8	0.01138979	10.8	0.01594283	10.8	0.0159596	10.8	0.01819795	10.8	0.01542492	10.8	0.01486464	10.8	0.01088715	10.8	0.0148483	10.8	0.01403986	10.8	0.01515589	10.8	0.00687611	10.8	0.01746212	10.8	0.01456298	10.8	0.0134223
11	0.01295426	11	0.00573613	11	0.01367624	11	0.01737242	11	0.01479462	11	0.01389333	11	0.01649412	11	0.01692715	11	0.01529796	11	0.01681232	11	0.0129992	11	0.01160134	11	0.0073804	11	0.01434699	11	0.00830589	11	0.01204191
11.2	0.01554709	11.2	0.0106831	11.2	0.01827084	11.2	0.01310086	11.2	0.00941926	11.2	0.01312487	11.2	0.01610273	11.2	0.01630905	11.2	0.01239591	11.2	0.01089361	11.2	0.0091832	11.2	0.01537932	11.2	0.00496656	11.2	0.01756825	11.2	0.01279954	11.2	0.01297556
11.4	0.01320278	11.4	0.01329564	11.4	0.01550905	11.4	0.01894135	11.4	0.01657271	11.4	0.01897359	11.4	0.02023148	11.4	0.01963609	11.4	0.01678221	11.4	0.01872994	11.4	0.01946949	11.4	0.01460832	11.4	0.00487176	11.4	0.01813293	11.4	0.0160757	11.4	0.01648205
11.6	0.01586933	11.6	0.01010493	11.6	0.01800511	11.6	0.01974638	11.6	0.01871444	11.6	0.01859816	11.6	0.01955159	11.6	0.01557772	11.6	0.01421535	11.6	0.01257214	11.6	0.0149716	11.6	0.00858567	11.6	0.00548441	11.6	0.0145227	11.6	0.01342883	11.6	0.01334562
11.8	0.01517672	11.8	0.01318223	11.8	0.01242526	11.8	0.01509177	11.8	0.0162604	11.8	0.01646135	11.8	0.01513696	11.8	0.01605722	11.8	0.01826285	11.8	0.01741797	11.8	0.01920267	11.8	0.01122431	11.8	0.0029601	11.8	0.02325549	11.8	0.01298005	11.8	0.01720721
12	0.01075457	12	0.01099388	12	0.01500414	12	0.01526663	12	0.01487708	12	0.01504453	12	0.01768255	12	0.01161782	12	0.01316721	12	0.01671969	12	0.01384049	12	0.00923668	12	0.00794723	12	0.02045402	12	0.01364065	12	0.01590684
12.2	0.01578926	12.2	0.00843483	12.2	0.01287235	12.2	0.01418727	12.2	0.01517247	12.2	0.01923063	12.2	0.0184698	12.2	0.01201815	12.2	0.01195254	12.2	0.01970096	12.2	0.01547405	12.2	0.01522097	12.2	0.00968048	12.2	0.01916276	12.2	0.02020528	12.2	0.01262146
12.4	0.019258	12.4	0.01461225	12.4	0.01412087	12.4	0.01654656	12.4	0.01251413	12.4	0.01512343	12.4	0.01541185	12.4	0.01807214	12.4	0.01671561	12.4	0.01892827	12.4	0.0148854	12.4	0.01490406	12.4	0.00725236	12.4	0.02251794	12.4	0.02077397	12.4	0.01620521
12.6	0.01786941	12.6	0.00839728	12.6	0.0159058	12.6	0.02104251	12.6	0.01676435	12.6	0.02134879	12.6	0.0200092	12.6	0.01676205	12.6	0.01515854	12.6	0.01969569	12.6	0.01862952	12.6	0.01134596	12.6	0.00961905	12.6	0.01899528	12.6	0.01662865	12.6	0.0137599
12.8	0.01544849	12.8	0.00952287	12.8	0.01606137	12.8	0.01608358	12.8	0.01604595	12.8	0.01840345	12.8	0.01420151	12.8	0.01200177	12.81	0.01530979	12.81	0.01804682	12.81	0.01339323	12.81	0.01230374	12.81	0.00765268	12.81	0.01741575	12.81	0.01746923	12.81	0.01586921
13	0.01463481	13	0.01104889	13	0.01518445	13	0.01468835	13	0.01670412	13	0.01732061	13	0.01408373	13	0.01326999	13	0.01408506	13	0.01962109	13	0.01822975	13	0.01406634	13	0.00612237	13	0.02110979	13	0.01632317	13	0.01920624
13.2	0.0127229	13.2	0.01173303	13.2	0.01748422	13.2	0.01569536	13.2	0.01792948	13.2	0.02090474	13.2	0.01837975	13.2	0.01743824	13.2	0.01480665	13.2	0.02144601	13.2	0.01815131	13.2	0.01322624	13.2	0.00716839	13.2	0.01897967	13.2	0.01380854	13.2	0.0150833
13.4	0.01470563	13.4	0.01201089	13.4	0.01317175	13.4	0.01753605	13.4	0.01468572	13.4	0.0160665	13.4	0.01480694	13.4	0.01802169	13.4	0.01409385	13.4	0.02011598	13.4	0.01716154	13.4	0.01958558	13.4	0.00773127	13.4	0.01983645	13.4	0.01785779	13.4	0.01404007
13.6	0.01506718	13.6	0.01417507	13.6	0.01749724	13.6	0.02059108	13.6	0.01434514	13.6	0.01602012	13.6	0.01677451	13.6	0.01596337	13.6	0.01916264	13.6	0.01837679	13.6	0.01535181	13.6	0.00930507	13.6	0.00731494	13.6	0.01961473	13.6	0.01266671	13.6	0.01263006
13.8	0.00945486	13.8	0.01134537	13.8	0.01297401	13.8	0.02146221	13.8	0.0170233	13.8	0.01684859	13.8	0.01464883	13.8	0.01890896	13.8	0.01425496	13.8	0.01661506	13.8	0.01245434	13.8	0.01548724	13.8	0.00744627	13.8	0.020239	13.8	0.01833218	13.8	0.0157144
14	0.01253489	14	0.01363743	14	0.01615734	14	0.019739	14	0.01701642	14	0.02078271	14	0.01782638	14	0.01459743	14	0.0181719	14	0.02109212	14	0.00944782	14	0.01113232	14	0.00933435	14	0.02111239	14	0.02339318	14	0.01559189
14.2	0.01287115	14.2	0.01388054	14.2	0.01746039	14.2	0.01752367	14.2	0.0145782	14.2	0.02109713	14.2	0.01849434	14.2	0.00923549	14.2	0.01314071	14.2	0.0215671	14.2	0.01433527	14.2	0.0156129	14.2	0.00574772	14.2	0.01707047	14.2	0.01340971	14.2	0.01287942
14.4	0.01828403	14.4	0.01273206	14.4	0.01469014	14.4	0.02250868	14.4	0.01582978	14.4	0.01892951	14.4	0.01774835	14.4	0.01577941	14.4	0.0181787	14.4	0.02269498	14.4	0.01676899	14.4	0.01217896	14.4	0.00756399	14.4	0.02188441	14.4	0.01699683	14.4	0.01674326
14.6	0.0161005	14.6	0.01076508	14.6	0.01515462	14.6	0.01767525	14.6	0.01638746	14.6	0.01717307	14.6	0.01620023	14.6	0.01832173	14.6	0.01711152	14.6	0.01861271	14.6	0.01836692	14.6	0.01292758	14.6	0.01102341	14.6	0.01791073	14.6	0.01972597	14.6	0.01541372
14.8	0.01596783	14.8	0.01007612	14.8	0.01890503	14.8	0.01946035	14.8	0.01908569	14.8	0.01666168	14.8	0.01766301	14.8	0.01459915	14.8	0.01573468	14.8	0.02083448	14.8	0.0200488	14.8	0.01588433	14.8	0.01339609	14.8	0.01650869	14.8	0.01429651	14.8	0.01334679
15	0.01695449	15	0.01209453	15	0.01808757	15	0.01902567	15	0.01801725	15	0.01995646	15	0.02067712	15	0.01641777	15	0.01328022	15	0.01632637	15	0.02031321	15	0.01123922	15	0.00615081	15	0.02050772	15	0.02008063	15	0.0149424
15.2	0.01088085	15.2	0.01336627	15.2	0.01494794	15.2	0.01653037	15.2	0.01380712	15.2	0.02081296	15.2	0.01584817	15.2	0.01567234	15.2	0.01383571	15.2	0.01936962	15.2	0.01505138	15.2	0.01864364	15.2	0.00567132	15.2	0.01802592	15.2	0.0196307	15.2	0.01191245
15.4	0.01497709	15.4	0.00881028	15.4	0.01660325	15.4	0.02091678	15.4	0.01572525	15.4	0.02360439	15.4	0.01659405	15.4	0.01800568	15.4	0.0186109	15.4	0.02017256	15.4	0.02194703	15.4	0.01557805	15.4	0.00951988	15.4	0.0218388	15.4	0.01808648	15.4	0.01747301
15.6	0.01330508	15.6	0.01177532	15.6	0.0157651	15.6	0.01908801	15.6	0.01705639	15.6	0.01766378	15.6	0.01567037	15.6	0.01788276	15.6	0.0167472	15.6	0.01843607	15.6	0.01878273	15.6	0.0166739	15.6	0.00822214	15.6	0.0207467	15.6	0.01885933	15.6	0.01609568
15.81	0.01484312	15.81	0.0118115	15.81	0.01690334	15.81	0.01921744	15.81	0.01809179	15.81	0.02195243	15.81	0.01839897	15.81	0.01562308	15.8	0.01603313	15.8	0.01882165	15.8	0.01998764	15.8	0.01514745	15.8	0.00829886	15.8	0.01870648	15.8	0.02066227	15.8	0.01910484
16	0.01306692	16	0.00987796	16	0.01671397	16	0.02065273	16	0.01711622	16	0.02017772	16	0.01565196	16	0.01629061	16	0.015058	16	0.02017378	16	0.02114933	16	0.01661206	16	0.00502019	16	0.02137726	16	0.01799908	16	0.01593096
16.2	0.02000517	16.2	0.01632938	16.2	0.0153593	16.2	0.01983592	16.2	0.01879313	16.2	0.02236713	16.2	0.01674338	16.2	0.01591483	16.2	0.01982355	16.2	0.02117137	16.2	0.02088454	16.2	0.01284931	16.2	0.01233364	16.2	0.01820838	16.2	0.01732022	16.2	0.01914733
16.4	0.01630864	16.4	0.01390081	16.4	0.01282207	16.4	0.02108782	16.4	0.01595044	16.4	0.01858636	16.4	0.01541929	16.4	0.01778988	16.4	0.01793583	16.4	0.01736623	16.4	0.01379745	16.4	0.01137582	16.4	0.00799995	16.4	0.02037437	16.4	0.02321623	16.4	0.01872009
16.6	0.0169528	16.6	0.020212	16.6	0.01644303	16.6	0.02405702	16.6	0.02085989	16.6	0.01570282	16.6	0.01781486	16.6	0.01866812	16.6	0.01568703	16.6	0.02097611	16.6	0.01783811	16.6	0.01669307	16.6	0.00865271	16.6	0.01756627	16.6	0.01708372	16.6	0.02141869
16.8	0.0133415	16.8	0.01274181	16.8	0.01931194	16.8	0.0201088	16.8	0.01595413	16.8	0.018384	16.8	0.01399964	16.8	0.01987514	16.8	0.01919308	16.8	0.01783836	16.8	0.01688671	16.8	0.01465276	16.8	0.00611076	16.8	0.022988	16.8	0.01243607	16.8	0.01454874
17	0.01295661	17	0.00926708	17	0.01832072	17	0.0159948	17	0.01852473	17	0.01866035	17	0.016793	17	0.01902323	17	0.02197305	17	0.01574553	17	0.02112393	17	0.01233919	17	0.00834588	17	0.01587412	17	0.01299489	17	0.01300843
17.2	0.01587178	17.2	0.01273731	17.2	0.0173556	17.2	0.01833105	17.2	0.02290898	17.2	0.0190351	17.2	0.01303348	17.2	0.01398497	17.2	0.0145494	17.2	0.01503412	17.2	0.01499773	17.2	0.01541676	17.2	0.01172345	17.2	0.02082836	17.2	0.01868996	17.2	0.01805078
17.4	0.01349701	17.4	0.01162553	17.4	0.01397243	17.4	0.02217368	17.4	0.01938549	17.4	0.02130687	17.4	0.02338896	17.4	0.01366028	17.4	0.01821895	17.4	0.01631697	17.4	0.01937232	17.4	0.01427334	17.4	0.00447918	17.4	0.02214005	17.4	0.01892142	17.4	0.01888194
17.6	0.01227453	17.6	0.01527499	17.6	0.01411666	17.6	0.01928733	17.6	0.01410705	17.6	0.01629388	17.6	0.01526381	17.6	0.01449488	17.6	0.01584098	17.6	0.02198343	17.6	0.01702102	17.6	0.01758406	17.6	0.00731673	17.6	0.02254654	17.6	0.01914412	17.6	0.01646952
17.8	0.01790761	17.8	0.01179213	17.8	0.01733111	17.8	0.01986608	17.8	0.01746186	17.8	0.01787006	17.8	0.01707317	17.8	0.01626034	17.8	0.01798095	17.8	0.01449205	17.8	0.02010478	17.8	0.02164673	17.8	0.00975433	17.8	0.02188856	17.8	0.01310006	17.8	0.01191897
18	0.01293626	18	0.01347314	18	0.01804621	18	0.01700081	18	0.01926511	18	0.01980645	18	0.01448404	18	0.01830092	18	0.01408221	18	0.01809166	18	0.01936224	18	0.01623006	18	0.00537853	18	0.01972794	18	0.0173782	18	0.02208045
18.2	0.01740829	18.2	0.01555455	18.2	0.01325303	18.2	0.01867728	18.2	0.02133561	18.2	0.01631577	18.2	0.01537702	18.2	0.01974257	18.2	0.01935742	18.2	0.01887675	18.2	0.01979065	18.2	0.01550219	18.2	0.01135136	18.2	0.02459883	18.2	0.0180057	18.2	0.01671958
18.4	0.01253542	18.4	0.01648168	18.4	0.01840011	18.4	0.02549901	18.4	0.02289264	18.4	0.01932043	18.4	0.02210211	18.4	0.02103893	18.4	0.01791666	18.4	0.0198562	18.4	0.01773839	18.4	0.01855237	18.4	0.007923	18.4	0.02095641	18.4	0.01572064	18.4	0.01562953
18.6	0.01415164	18.6	0.01110617	18.6	0.01772681	18.6	0.0207243	18.6	0.0199095	18.6	0.0174016	18.6	0.02152664	18.6	0.01592352	18.6	0.01822575	18.6	0.02042028	18.6	0.02405443	18.6	0.01302502	18.6	0.00907114	18.6	0.0195621	18.6	0.02137194	18.6	0.01673594
18.8	0.01285675	18.8	0.01256386	18.8	0.01088055	18.8	0.02291379	18.8	0.01652926	18.8	0.01875404	18.8	0.02200086	18.8	0.0186516	18.8	0.01851803	18.8	0.02527405	18.8	0.02466603	18.8	0.01642676	18.8	0.01122794	18.8	0.02451393	18.8	0.01781375	18.8	0.01792414
19	0.01469847	19	0.01421728	19	0.01688627	19	0.02347045	19	0.01942592	19	0.01700253	19	0.01476779	19	0.01905125	19	0.02413215	19	0.02189842	19	0.02290794	19	0.01648769	19	0.0086202	19	0.02353066	19	0.02170455	19	0.01775885
19.2	0.02029187	19.2	0.01298443	19.2	0.01939733	19.2	0.02482583	19.2	0.01800455	19.2	0.02035993	19.2	0.01541201	19.2	0.01687877	19.2	0.01941224	19.2	0.02089168	19.2	0.01702329	19.2	0.01558833	19.2	0.00847187	19.2	0.02567809	19.2	0.02123678	19.2	0.01934001
19.4	0.01758885	19.4	0.01548165	19.4	0.01857505	19.4	0.0196658	19.4	0.01947595	19.4	0.02048572	19.4	0.01979184	19.4	0.01841567	19.4	0.02172337	19.4	0.02144228	19.4	0.01914039	19.4	0.01949786	19.4	0.01192756	19.4	0.02122568	19.4	0.02043935	19.4	0.02177117
19.6	0.01754062	19.6	0.01520193	19.6	0.01443049	19.6	0.02401842	19.6	0.02217345	19.6	0.01813277	19.6	0.02019437	19.6	0.02125721	19.6	0.01925907	19.6	0.01998205	19.6	0.02201506	19.6	0.01577152	19.6	0.00850326	19.6	0.0220108	19.6	0.01451678	19.6	0.01513405
19.8	0.01691989	19.8	0.01188748	19.8	0.01809879	19.8	0.01915792	19.8	0.02085888	19.8	0.01835417	19.8	0.01603223	19.8	0.01838758	19.8	0.02036358	19.8	0.02402929	19.8	0.01435033	19.8	0.01516395	19.8	0.01100191	19.8	0.02147745	19.8	0.02067435	19.8	0.02062967
20	0.01524468	20	0.01526805	20	0.01962384	20	0.02240127	20	0.0188982	20	0.01986704	20	0.01852408	20	0.01626053	20	0.01914567	20	0.01990976	20	0.02090563	20	0.01711432	20	0.01011986	20	0.0184378	20	0.01729409	20	0.01633561
20.2	0.01930617	20.2	0.01617285	20.2	0.01713866	20.2	0.02096939	20.2	0.01127193	20.2	0.0197456	20.2	0.01784729	20.2	0.01849565	20.2	0.01989389	20.2	0.02128409	20.2	0.01738068	20.2	0.02068817	20.2	0.00943765	20.2	0.02128051	20.2	0.02263146	20.2	0.01774784
20.4	0.01555084	20.4	0.01744625	20.4	0.01410384	20.4	0.0232118	20.4	0.01898398	20.4	0.02189897	20.4	0.01731388	20.4	0.01865117	20.4	0.0150734	20.4	0.01980909	20.4	0.02247271	20.4	0.01687784	20.4	0.0103132	20.4	0.02475525	20.4	0.01746956	20.4	0.01885612
20.6	0.01162023	20.6	0.01464115	20.6	0.01842937	20.6	0.02355711	20.6	0.01813569	20.6	0.02385584	20.6	0.02318879	20.6	0.02091153	20.6	0.018202	20.6	0.01983188	20.6	0.01877858	20.6	0.01869356	20.6	0.01127311	20.6	0.02522675	20.6	0.01599078	20.6	0.02108124
20.8	0.01349751	20.8	0.01675517	20.8	0.01635407	20.8	0.02016913	20.8	0.01962387	20.8	0.02097443	20.8	0.01963567	20.8	0.01925349	20.8	0.01786018	20.8	0.02061352	20.8	0.01924656	20.8	0.01837705	20.8	0.01371216	20.8	0.02675451	20.8	0.01794473	20.8	0.01793608
21	0.01740886	21	0.02046973	21	0.01653008	21	0.02007834	21	0.01601051	21	0.01900694	21	0.01536178	21	0.01794483	21	0.02045048	21	0.02221558	21	0.02091638	21	0.01422005	21	0.00879244	21	0.02221334	21	0.02111223	21	0.01810408
21.2	0.021219	21.2	0.01822428	21.2	0.01275728	21.2	0.02311617	21.2	0.01741696	21.2	0.01868559	21.2	0.01671563	21.2	0.0212594	21.2	0.01891454	21.2	0.01393227	21.2	0.02149144	21.2	0.01815166	21.2	0.00902874	21.2	0.02274894	21.2	0.02025267	21.2	0.01854767
21.4	0.02033089	21.4	0.01488522	21.4	0.02088812	21.4	0.02282759	21.4	0.01839143	21.4	0.01853032	21.4	0.02200338	21.4	0.02333443	21.4	0.01614059	21.4	0.0217924	21.4	0.02225721	21.4	0.01844063	21.4	0.00908311	21.4	0.02231563	21.4	0.01547956	21.4	0.01916452
21.6	0.01452961	21.6	0.01313789	21.6	0.01946269	21.6	0.02178231	21.6	0.02188694	21.6	0.02285664	21.6	0.01619335	21.6	0.01772376	21.6	0.01547406	21.6	0.02130766	21.6	0.01908839	21.6	0.02138527	21.6	0.00718671	21.6	0.0239603	21.6	0.02162023	21.6	0.01991595
21.8	0.01631108	21.8	0.01419547	21.8	0.01671558	21.8	0.02191598	21.8	0.01768589	21.8	0.0208505	21.8	0.01725516	21.8	0.01691189	21.8	0.02148408	21.8	0.02311597	21.8	0.0254345	21.8	0.01568741	21.8	0.01412541	21.8	0.02067742	21.8	0.01945462	21.8	0.02170009
22	0.01193142	22	0.01572663	22	0.01895909	22	0.02214865	22	0.01871357	22	0.01997633	22	0.01819575	22	0.01520907	22	0.02092294	22	0.02324338	22	0.0223931	22	0.01459715	22	0.00828473	22	0.02413343	22	0.02251123	22	0.01606159
22.2	0.0217755	22.2	0.01159105	22.2	0.02156203	22.2	0.02152235	22.2	0.0176647	22.2	0.02387363	22.2	0.01722506	22.2	0.01785961	22.2	0.02119215	22.2	0.02077569	22.2	0.01998635	22.2	0.02047537	22.2	0.0083555	22.2	0.02562914	22.2	0.01915916	22.2	0.01856163
22.4	0.01628765	22.4	0.01120913	22.4	0.01647649	22.4	0.02307153	22.4	0.0151564	22.4	0.02371687	22.4	0.01435716	22.4	0.01843359	22.4	0.01913782	22.4	0.02228146	22.4	0.01786784	22.4	0.01966346	22.4	0.0070125	22.4	0.02290294	22.4	0.02139252	22.4	0.01763177
22.6	0.01817287	22.6	0.01706169	22.6	0.01955563	22.6	0.0247982	22.6	0.01827033	22.6	0.0202568	22.6	0.01986117	22.6	0.01779614	22.6	0.02160468	22.6	0.01953304	22.6	0.02220097	22.6	0.0188766	22.6	0.01440911	22.6	0.02321875	22.6	0.01756537	22.6	0.01918296
22.8	0.01557746	22.8	0.00877028	22.8	0.01709209	22.8	0.02312421	22.8	0.01986649	22.8	0.01827027	22.8	0.01589132	22.8	0.01821999	22.8	0.01720479	22.8	0.01976519	22.8	0.02088248	22.8	0.01796939	22.8	0.00847312	22.8	0.02682783	22.8	0.01877879	22.8	0.01838818
23	0.02095284	23	0.0166152	23	0.02093487	23	0.02540569	23	0.02093387	23	0.01902789	23	0.01900018	23	0.01800582	23	0.02096781	23	0.02242827	23	0.01974705	23	0.01396287	23	0.01190534	23	0.02041905	23	0.01455148	23	0.01949443
23.2	0.01904894	23.2	0.0171554	23.2	0.01854323	23.2	0.02587225	23.2	0.02052332	23.2	0.02416858	23.2	0.01533797	23.2	0.0173577	23.2	0.02100267	23.2	0.02263715	23.2	0.02297063	23.2	0.01571956	23.2	0.01062407	23.2	0.0244339	23.2	0.02175614	23.2	0.01945487
23.4	0.0166525	23.4	0.01615594	23.4	0.01653985	23.4	0.01765632	23.4	0.02224977	23.4	0.02233512	23.4	0.02151959	23.4	0.01995804	23.4	0.02011503	23.4	0.01927274	23.4	0.02060284	23.4	0.01831209	23.4	0.01157227	23.4	0.02370851	23.4	0.02040438	23.4	0.02047248
23.6	0.01800781	23.6	0.01474073	23.6	0.02068352	23.6	0.02113271	23.6	0.01540907	23.6	0.02183734	23.6	0.02359545	23.6	0.02123758	23.6	0.01900543	23.6	0.02151748	23.6	0.02005918	23.6	0.01617041	23.6	0.00564499	23.6	0.02543984	23.6	0.01757484	23.6	0.02008109
23.8	0.01826727	23.8	0.01442558	23.8	0.01950006	23.8	0.02335567	23.8	0.02012289	23.8	0.01866082	23.8	0.015908	23.8	0.02192	23.8	0.0154427	23.8	0.02057373	23.8	0.02221919	23.8	0.01854331	23.8	0.01025561	23.8	0.02245058	23.8	0.02224639	23.8	0.02308642
24	0.01817913	24	0.0135988	24	0.01570381	24	0.01894987	24	0.01664809	24	0.0237598	24	0.01774848	24	0.01992631	24	0.01579391	24	0.02646369	24	0.0216219	24	0.01753553	24	0.01286695	24	0.02611987	24	0.01873424	24	0.0187156
24.2	0.01529315	24.2	0.01500672	24.2	0.01786578	24.2	0.02403815	24.2	0.01727812	24.2	0.02404734	24.2	0.01618683	24.2	0.01432225	24.2	0.02269656	24.2	0.01909092	24.2	0.01513986	24.2	0.01802365	24.2	0.00653948	24.2	0.02939874	24.2	0.02049801	24.2	0.02118621
24.4	0.0199712	24.4	0.01851745	24.4	0.01706575	24.4	0.02070072	24.4	0.01701795	24.4	0.02460424	24.4	0.01987743	24.4	0.01934066	24.4	0.01837391	24.4	0.02247648	24.4	0.02425646	24.4	0.01777745	24.4	0.01066672	24.4	0.02737977	24.4	0.02142014	24.4	0.0212776
24.6	0.01736045	24.6	0.01754009	24.6	0.01664027	24.6	0.02056237	24.6	0.01903305	24.6	0.01666509	24.6	0.01599239	24.6	0.01684714	24.6	0.02128322	24.6	0.02432337	24.6	0.02034493	24.6	0.01555374	24.6	0.00599465	24.6	0.0229188	24.6	0.02598165	24.6	0.01629741
24.8	0.02007287	24.8	0.02080919	24.8	0.01747227	24.8	0.02210056	24.8	0.01633748	24.8	0.02050446	24.8	0.01822514	24.8	0.02208267	24.8	0.02436586	24.8	0.02547549	24.8	0.02328449	24.8	0.0157491	24.8	0.00686724	24.8	0.02405739	24.8	0.02539429	24.8	0.01976955
25	0.01569016	25	0.01820064	25	0.01927925	25	0.02325617	25	0.02136778	25	0.01725512	25	0.01873895	25	0.02270918	25	0.02000307	25	0.02324359	25	0.01973683	25	0.02347866	25	0.01528776	25	0.02728997	25	0.02767735	25	0.01835324
25.2	0.01524296	25.2	0.023731	25.2	0.01644659	25.2	0.02051069	25.2	0.01854002	25.2	0.02220495	25.2	0.01666517	25.2	0.02143391	25.2	0.01688258	25.2	0.02005119	25.2	0.01931472	25.2	0.01872507	25.2	0.0072583	25.2	0.02703195	25.2	0.0180929	25.2	0.01522085
25.41	0.0196321	25.41	0.01553149	25.41	0.02030606	25.41	0.02145904	25.41	0.0159876	25.41	0.02564818	25.41	0.01668714	25.41	0.02014923	25.4	0.0203963	25.4	0.02212786	25.4	0.02164773	25.4	0.01623558	25.4	0.01338666	25.4	0.02759406	25.4	0.02249071	25.4	0.01939061
25.6	0.01515321	25.6	0.0145202	25.6	0.01745709	25.6	0.02149769	25.6	0.02008198	25.6	0.02005763	25.6	0.01674121	25.6	0.01983048	25.6	0.02388315	25.6	0.02545921	25.6	0.02472277	25.6	0.02147197	25.6	0.01287676	25.6	0.02564882	25.6	0.02023886	25.6	0.01933379
25.8	0.01825217	25.8	0.01859603	25.8	0.01845165	25.8	0.02465331	25.8	0.02339617	25.8	0.02193988	25.8	0.01577399	25.8	0.02017628	25.8	0.02301171	25.8	0.02678277	25.8	0.01966472	25.8	0.0167616	25.8	0.01368738	25.8	0.02657389	25.8	0.02460421	25.8	0.01677464
26	0.02033836	26	0.01199291	26	0.01933407	26	0.02369738	26	0.02198729	26	0.02269983	26	0.01906308	26	0.02596824	26	0.02073725	26	0.02242475	26	0.02355416	26	0.01781425	26	0.01089831	26	0.0262978	26	0.01837883	26	0.02209797
26.2	0.01933986	26.2	0.01395019	26.2	0.01944123	26.2	0.02527628	26.2	0.0233004	26.2	0.01901516	26.2	0.02152384	26.2	0.01774324	26.2	0.02109885	26.2	0.02216821	26.2	0.02339506	26.2	0.01961855	26.2	0.00758379	26.2	0.02302035	26.2	0.02263018	26.2	0.01782973
26.4	0.01447307	26.4	0.01550327	26.4	0.02058279	26.4	0.02698014	26.4	0.02114936	26.4	0.02340079	26.4	0.02132512	26.4	0.01774709	26.4	0.02040764	26.4	0.02462945	26.4	0.02304697	26.4	0.02089404	26.4	0.01478857	26.4	0.02779976	26.4	0.02322189	26.4	0.01939308
26.6	0.01396023	26.6	0.01657108	26.6	0.01911841	26.6	0.03079539	26.6	0.02017054	26.6	0.02484379	26.6	0.01459081	26.6	0.0235286	26.6	0.022776	26.6	0.02412658	26.6	0.02469545	26.6	0.01878969	26.6	0.01272849	26.6	0.02737423	26.6	0.02043644	26.6	0.01686111
26.8	0.01829937	26.8	0.01333204	26.8	0.01823653	26.8	0.02106643	26.8	0.02135291	26.8	0.0213734	26.8	0.01634406	26.8	0.01837375	26.8	0.02153391	26.8	0.01912936	26.8	0.01965984	26.8	0.0172296	26.8	0.0183525	26.8	0.02382734	26.8	0.02376675	26.8	0.02203755
27	0.01891891	27	0.01550412	27	0.01676426	27	0.02357337	27	0.02341586	27	0.02278707	27	0.01805316	27	0.01613727	27	0.02276727	27	0.02494019	27	0.02153746	27	0.01865411	27	0.0112959	27	0.02614046	27	0.02083677	27	0.01961095
27.2	0.01688179	27.2	0.01590803	27.2	0.01725146	27.2	0.02174251	27.2	0.01874309	27.2	0.02168058	27.2	0.0155492	27.2	0.01926829	27.2	0.01714097	27.2	0.02383782	27.2	0.02307959	27.2	0.02317424	27.2	0.01282477	27.2	0.02734267	27.2	0.01805276	27.2	0.0181914
27.4	0.01726312	27.4	0.01918055	27.4	0.01624673	27.4	0.02530088	27.4	0.0175859	27.4	0.02207926	27.4	0.01916428	27.4	0.02372755	27.4	0.01938842	27.4	0.02313707	27.4	0.02299385	27.4	0.01890868	27.4	0.01266498	27.4	0.02568982	27.4	0.02326025	27.4	0.01677906
27.6	0.02229398	27.6	0.0201363	27.6	0.0174797	27.6	0.02609829	27.6	0.01897468	27.6	0.02083079	27.6	0.01848933	27.6	0.02678497	27.6	0.0222876	27.6	0.02588133	27.6	0.02760111	27.6	0.01758438	27.6	0.00303764	27.6	0.02148493	27.6	0.0204856	27.6	0.02176071
27.8	0.02237946	27.8	0.01725441	27.8	0.01893695	27.8	0.02049461	27.8	0.02294391	27.8	0.01909204	27.8	0.01822871	27.8	0.02205227	27.8	0.02365541	27.8	0.01997509	27.8	0.02272677	27.8	0.0223124	27.8	0.01143578	27.8	0.02440533	27.8	0.02298848	27.8	0.01983348
28	0.02172931	28	0.01360357	28	0.01721063	28	0.02653595	28	0.0186325	28	0.01990663	28	0.01827692	28	0.02131488	28	0.02185902	28	0.02289605	28	0.02001777	28	0.01765067	28	0.01019523	28	0.02447166	28	0.02477138	28	0.01856443
28.2	0.0178222	28.2	0.0161373	28.2	0.02143291	28.2	0.02343016	28.2	0.02003667	28.2	0.02380008	28.2	0.01796204	28.2	0.02310596	28.2	0.02217784	28.2	0.02479259	28.2	0.02280783	28.2	0.02170742	28.2	0.01106215	28.2	0.0250023	28.2	0.02138906	28.2	0.01707928
28.4	0.01857163	28.4	0.01568926	28.4	0.0232043	28.4	0.02594348	28.4	0.02072449	28.4	0.02244626	28.4	0.01971874	28.4	0.02371513	28.4	0.02322928	28.4	0.02635387	28.4	0.02243567	28.4	0.01756079	28.4	0.01319752	28.4	0.02412886	28.4	0.02341091	28.4	0.01776059
28.6	0.0201032	28.6	0.01379001	28.6	0.02009979	28.6	0.02746658	28.6	0.02103097	28.6	0.02278512	28.6	0.02026451	28.6	0.01962	28.6	0.02180071	28.6	0.02437825	28.6	0.02137124	28.6	0.02143996	28.6	0.011177	28.6	0.02414713	28.6	0.02502807	28.6	0.02198284
28.8	0.01595493	28.8	0.01942339	28.8	0.0202654	28.8	0.01922296	28.8	0.01741535	28.8	0.02774942	28.8	0.02057742	28.8	0.021219	28.8	0.0260173	28.8	0.02409085	28.8	0.02218944	28.8	0.01852609	28.8	0.01016244	28.8	0.0275891	28.8	0.02252053	28.8	0.01979894
29	0.02273594	29	0.02085089	29	0.02204688	29	0.02184501	29	0.01804253	29	0.02609804	29	0.01635692	29	0.02026857	29	0.0175207	29	0.02205328	29	0.02213598	29	0.01762028	29	0.01036886	29	0.02625717	29	0.0208942	29	0.01909773
29.2	0.01453671	29.2	0.0138389	29.2	0.02141986	29.2	0.02414346	29.2	0.02109526	29.2	0.02504486	29.2	0.02062282	29.2	0.02463407	29.2	0.01825893	29.2	0.02594905	29.2	0.02265177	29.2	0.01826891	29.2	0.01103442	29.2	0.02927634	29.2	0.02201314	29.2	0.02365502
29.4	0.01883125	29.4	0.01696866	29.4	0.01613435	29.4	0.02439108	29.4	0.02048076	29.4	0.02386765	29.4	0.02142701	29.4	0.01860427	29.4	0.02208398	29.4	0.02143987	29.4	0.0240111	29.4	0.01926266	29.4	0.01116016	29.4	0.02803385	29.4	0.02106188	29.4	0.02110253
29.6	0.01361041	29.6	0.01615763	29.6	0.01755283	29.6	0.02356415	29.6	0.02218347	29.6	0.02364893	29.6	0.01936919	29.6	0.02023731	29.6	0.02029845	29.6	0.02477672	29.6	0.02070988	29.6	0.01712052	29.6	0.01119187	29.6	0.02577611	29.6	0.02313165	29.6	0.02116623
29.8	0.01616261	29.8	0.01627989	29.8	0.01995403	29.8	0.02534859	29.8	0.0213631	29.8	0.02479727	29.8	0.02211708	29.8	0.01587189	29.8	0.02330228	29.8	0.02383166	29.8	0.02441214	29.8	0.02104702	29.8	0.01228144	29.8	0.02632672	29.8	0.02411021	29.8	0.01886392
30	-4.04876	30	-4.100331	30	-4.124429	30	-4.033505	30	-4.048636	30	-4.113904	30	-4.114728	30	-4.065714	30	-4.10069	30	-4.152319	30	-4.145259	30	-4.105021	30	-3.977171	30	-4.036375	30	-3.975782	30	-3.997665
30.2	-4.236304	30.2	-4.272405	30.2	-4.307385	30.2	-4.206759	30.2	-4.237331	30.2	-4.299613	30.2	-4.297728	30.2	-4.241002	30.2	-4.228609	30.2	-4.296585	30.2	-4.278628	30.2	-4.242829	30.2	-4.108622	30.2	-4.181114	30.2	-4.107968	30.2	-4.136656
30.4	-4.354238	30.4	-4.399521	30.4	-4.433797	30.4	-4.332911	30.4	-4.36064	30.4	-4.421865	30.4	-4.424542	30.4	-4.366564	30.4	-4.324107	30.4	-4.40649	30.4	-4.385074	30.4	-4.345802	30.4	-4.213008	30.4	-4.278387	30.4	-4.204649	30.4	-4.241562
30.6	-4.455	30.6	-4.487203	30.6	-4.531323	30.6	-4.424659	30.6	-4.451655	30.6	-4.513455	30.6	-4.524027	30.6	-4.45976	30.6	-4.406914	30.6	-4.488891	30.6	-4.473041	30.6	-4.433349	30.6	-4.292642	30.6	-4.36739	30.6	-4.29044	30.6	-4.318558
30.8	-4.537657	30.8	-4.572568	30.8	-4.609201	30.8	-4.502533	30.8	-4.528962	30.8	-4.597417	30.8	-4.600257	30.8	-4.535653	30.8	-4.467672	30.8	-4.556151	30.8	-4.537812	30.8	-4.499925	30.8	-4.355931	30.8	-4.440671	30.8	-4.348747	30.8	-4.38412
31	-4.596201	31	-4.635375	31	-4.673717	31	-4.571302	31	-4.601549	31	-4.659685	31	-4.671168	31	-4.604425	31	-4.529027	31	-4.619602	31	-4.598505	31	-4.561398	31	-4.41132	31	-4.497259	31	-4.405949	31	-4.446212
31.2	-4.655694	31.2	-4.692087	31.2	-4.730987	31.2	-4.628901	31.2	-4.649442	31.2	-4.711424	31.2	-4.722871	31.2	-4.659481	31.2	-4.575657	31.2	-4.680758	31.2	-4.649196	31.2	-4.61543	31.2	-4.457372	31.2	-4.548357	31.2	-4.458044	31.2	-4.503102
31.4	-4.706203	31.4	-4.744865	31.4	-4.783862	31.4	-4.675042	31.4	-4.702913	31.4	-4.762734	31.4	-4.773356	31.4	-4.708867	31.4	-4.62212	31.4	-4.724048	31.4	-4.698546	31.4	-4.665853	31.4	-4.511569	31.4	-4.601968	31.4	-4.507758	31.4	-4.550558
31.6	-4.755994	31.6	-4.783695	31.6	-4.832439	31.6	-4.722654	31.6	-4.749523	31.6	-4.813877	31.6	-4.818896	31.6	-4.756582	31.6	-4.667671	31.6	-4.769533	31.6	-4.745413	31.6	-4.704621	31.6	-4.547331	31.6	-4.642233	31.6	-4.545029	31.6	-4.581831
31.8	-4.792374	31.8	-4.830542	31.8	-4.873286	31.8	-4.762725	31.8	-4.788822	31.8	-4.852094	31.8	-4.864659	31.8	-4.79801	31.8	-4.702743	31.8	-4.79961	31.8	-4.777746	31.8	-4.739497	31.8	-4.583061	31.8	-4.676098	31.8	-4.578996	31.8	-4.632302
32	-4.828388	32	-4.86829	32	-4.913846	32	-4.803127	32	-4.820813	32	-4.888979	32	-4.90008	32	-4.836519	32	-4.737088	32	-4.835473	32	-4.813601	32	-4.779823	32	-4.618435	32	-4.713815	32	-4.614857	32	-4.658525
32.2	-4.864315	32.2	-4.90649	32.2	-4.948144	32.2	-4.830839	32.2	-4.864142	32.2	-4.92425	32.2	-4.934896	32.2	-4.864817	32.2	-4.769181	32.2	-4.869571	32.2	-4.84631	32.2	-4.808413	32.2	-4.647949	32.2	-4.745049	32.2	-4.645189	32.2	-4.691232
32.4	-4.896498	32.4	-4.9372	32.4	-4.977903	32.4	-4.866749	32.4	-4.889954	32.4	-4.956831	32.4	-4.970108	32.4	-4.900135	32.4	-4.798629	32.4	-4.898071	32.4	-4.873528	32.4	-4.836044	32.4	-4.676293	32.4	-4.773647	32.4	-4.677073	32.4	-4.721072
32.6	-4.918857	32.6	-4.962561	32.6	-5.007143	32.6	-4.895174	32.6	-4.917927	32.6	-4.99025	32.6	-5.002527	32.6	-4.923909	32.6	-4.816817	32.6	-4.923101	32.6	-4.894767	32.6	-4.866119	32.6	-4.703938	32.6	-4.798291	32.6	-4.698006	32.6	-4.746562
32.8	-4.948957	32.8	-4.989295	32.8	-5.036047	32.8	-4.926107	32.8	-4.952213	32.8	-5.010975	32.8	-5.03088	32.8	-4.956949	32.8	-4.847037	32.8	-4.946864	32.8	-4.920722	32.8	-4.889847	32.8	-4.726596	32.8	-4.819903	32.8	-4.72211	32.8	-4.769911
33	-4.975162	33	-5.022285	33	-5.066183	33	-4.944364	33	-4.977886	33	-5.036052	33	-5.057309	33	-4.97727	33	-4.873192	33	-4.973117	33	-4.945605	33	-4.916831	33	-4.74248	33	-4.84325	33	-4.745037	33	-4.792999
33.2	-4.999279	33.2	-5.041096	33.2	-5.085204	33.2	-4.971476	33.2	-4.994406	33.2	-5.056842	33.2	-5.077172	33.2	-5.000003	33.2	-4.887562	33.2	-4.992536	33.2	-4.970037	33.2	-4.936086	33.2	-4.770859	33.2	-4.869086	33.2	-4.763597	33.2	-4.817211
33.4	-5.024629	33.4	-5.068027	33.4	-5.108217	33.4	-4.995911	33.4	-5.018447	33.4	-5.093512	33.4	-5.10079	33.4	-5.027359	33.43	-4.913692	33.43	-5.017591	33.43	-4.993893	33.43	-4.962202	33.43	-4.793805	33.43	-4.889176	33.43	-4.789804	33.43	-4.842135
33.6	-5.045537	33.6	-5.083654	33.6	-5.128014	33.6	-5.014978	33.6	-5.045389	33.6	-5.103858	33.6	-5.119718	33.6	-5.0482	33.6	-4.931118	33.6	-5.035522	33.6	-5.009066	33.6	-4.97064	33.6	-4.803912	33.6	-4.909804	33.6	-4.807333	33.6	-4.850452
33.8	-5.059372	33.8	-5.099998	33.8	-5.152457	33.8	-5.033793	33.8	-5.059434	33.8	-5.120467	33.8	-5.138154	33.8	-5.063012	33.8	-4.951635	33.8	-5.05138	33.8	-5.025863	33.8	-4.988137	33.8	-4.823825	33.8	-4.930707	33.8	-4.818718	33.8	-4.870888
34	-5.084126	34	-5.123347	34	-5.167942	34	-5.053949	34	-5.089998	34	-5.151155	34	-5.161687	34	-5.083813	34	-4.959523	34	-5.068036	34	-5.040541	34	-5.016634	34	-4.835957	34	-4.941526	34	-4.837639	34	-4.885598
34.2	-5.098176	34.2	-5.143363	34.2	-5.187508	34.2	-5.073262	34.2	-5.100091	34.2	-5.164474	34.2	-5.177511	34.2	-5.101662	34.2	-4.977814	34.2	-5.086778	34.2	-5.065678	34.2	-5.024188	34.2	-4.854203	34.2	-4.961834	34.2	-4.851773	34.2	-4.904747
34.4	-5.117662	34.4	-5.156275	34.4	-5.204947	34.4	-5.083155	34.4	-5.110997	34.4	-5.173295	34.4	-5.196427	34.4	-5.117434	34.4	-4.989287	34.4	-5.0953	34.4	-5.079964	34.4	-5.040544	34.4	-4.870632	34.4	-4.970439	34.4	-4.866433	34.4	-4.916582
34.6	-5.131188	34.6	-5.166975	34.6	-5.213278	34.6	-5.102134	34.6	-5.134209	34.6	-5.193592	34.6	-5.213317	34.6	-5.125388	34.61	-5.007205	34.61	-5.115591	34.61	-5.091782	34.61	-5.050203	34.61	-4.882619	34.61	-4.987872	34.61	-4.880506	34.61	-4.927255
34.8	-5.142253	34.8	-5.180023	34.8	-5.228062	34.8	-5.112257	34.8	-5.140827	34.8	-5.199588	34.8	-5.21982	34.8	-5.138348	34.8	-5.013532	34.8	-5.121399	34.8	-5.096748	34.8	-5.064933	34.8	-4.890251	34.8	-4.997628	34.8	-4.886055	34.8	-4.939348
35	-0.8572476	35	-0.8981178	35	-0.8769528	35	-0.8550719	35	-0.8739063	35	-0.8721735	35	-0.8516456	35	-0.8543375	35	-0.8338155	35	-0.8553922	35	-0.8316866	35	-0.8306132	35	-0.7965778	35	-0.8000559	35	-0.7853798	35	-0.8005515
35.2	-0.8246843	35.2	-0.8677894	35.2	-0.8470126	35.2	-0.8229026	35.2	-0.8395689	35.2	-0.8405158	35.2	-0.8235137	35.2	-0.8232904	35.2	-0.7996184	35.2	-0.8212316	35.2	-0.7996379	35.2	-0.7932573	35.2	-0.7667795	35.2	-0.761544	35.2	-0.7519046	35.2	-0.7653131
35.4	-0.7996375	35.4	-0.8367499	35.4	-0.8183398	35.4	-0.7934499	35.4	-0.8084207	35.4	-0.8168834	35.4	-0.8054864	35.4	-0.7997627	35.4	-0.7723093	35.4	-0.7918904	35.4	-0.7708415	35.4	-0.7681753	35.4	-0.7378085	35.4	-0.7342113	35.4	-0.720422	35.4	-0.7329618
35.6	-0.771758	35.6	-0.8118222	35.6	-0.7964382	35.6	-0.7779396	35.6	-0.7882697	35.6	-0.7933496	35.6	-0.7838749	35.6	-0.7809017	35.6	-0.7433206	35.6	-0.7681986	35.6	-0.7504044	35.6	-0.7419291	35.6	-0.7120293	35.6	-0.7081058	35.6	-0.6898917	35.6	-0.708515
35.8	-0.7562158	35.8	-0.7977224	35.8	-0.7826474	35.8	-0.7555221	35.8	-0.7766634	35.8	-0.7717789	35.8	-0.7627635	35.8	-0.7561661	35.8	-0.7290763	35.8	-0.74464	35.8	-0.7254809	35.8	-0.7239051	35.8	-0.6959733	35.8	-0.6912869	35.8	-0.6740469	35.8	-0.6933344
36	-0.7372081	36	-0.7809349	36	-0.7631096	36	-0.7391986	36	-0.7586273	36	-0.7562556	36	-0.7495784	36	-0.7400509	36	-0.7054435	36	-0.7239711	36	-0.7130004	36	-0.7076203	36	-0.6779531	36	-0.6717542	36	-0.6582729	36	-0.6754348
36.2	-0.7252436	36.2	-0.7715774	36.2	-0.7478052	36.2	-0.7279847	36.2	-0.738871	36.2	-0.7371999	36.2	-0.7428807	36.2	-0.729791	36.2	-0.68498	36.2	-0.7106473	36.2	-0.6879995	36.2	-0.689425	36.2	-0.6651349	36.2	-0.6548726	36.2	-0.6466832	36.2	-0.660818
36.4	-0.7122527	36.4	-0.7525462	36.4	-0.7384461	36.4	-0.7104787	36.4	-0.727828	36.4	-0.7307211	36.4	-0.7201725	36.4	-0.7139277	36.4	-0.6773424	36.4	-0.6937311	36.4	-0.6755155	36.4	-0.679311	36.4	-0.6492249	36.4	-0.6430334	36.4	-0.6322803	36.4	-0.6452287
36.6	-0.7029544	36.6	-0.7405378	36.6	-0.7214877	36.6	-0.7010677	36.6	-0.7137643	36.6	-0.7156289	36.6	-0.7161105	36.6	-0.7030391	36.6	-0.6636357	36.6	-0.6888437	36.6	-0.6643005	36.6	-0.6654807	36.6	-0.6374228	36.6	-0.6314847	36.6	-0.6215405	36.6	-0.6372316
36.8	-0.689279	36.8	-0.7295784	36.8	-0.7116617	36.8	-0.6885508	36.8	-0.7049998	36.8	-0.702484	36.8	-0.7014892	36.8	-0.6919978	36.8	-0.6535851	36.8	-0.6742261	36.8	-0.6592239	36.8	-0.6561906	36.8	-0.622744	36.8	-0.6191941	36.8	-0.6079632	36.8	-0.6215209
37	-0.6755538	37	-0.7219181	37	-0.7014323	37	-0.6779497	37	-0.6944957	37	-0.6934223	37	-0.695905	37	-0.6845371	37	-0.64649	37	-0.6649812	37	-0.6479431	37	-0.6466548	37	-0.6181318	37	-0.6057928	37	-0.6008392	37	-0.6164427
37.2	-0.6680377	37.2	-0.7129571	37.2	-0.6920226	37.2	-0.6713959	37.2	-0.6897365	37.2	-0.6834349	37.2	-0.6839214	37.2	-0.6761877	37.2	-0.6327568	37.2	-0.6515093	37.2	-0.6360331	37.2	-0.6356573	37.2	-0.6117971	37.2	-0.5984159	37.2	-0.5931332	37.2	-0.6049081
37.4	-0.6622048	37.4	-0.7009068	37.4	-0.6820389	37.4	-0.6596427	37.4	-0.6774393	37.4	-0.676921	37.4	-0.6753457	37.4	-0.6673515	37.4	-0.6210532	37.4	-0.6422589	37.4	-0.6242926	37.4	-0.6239117	37.4	-0.5986512	37.4	-0.5889863	37.4	-0.5808664	37.4	-0.5983194
37.6	-0.652686	37.6	-0.6941051	37.6	-0.6740134	37.6	-0.6512087	37.6	-0.6730143	37.6	-0.6705393	37.6	-0.6699478	37.6	-0.659524	37.6	-0.6132504	37.6	-0.6373647	37.6	-0.621303	37.6	-0.6190854	37.6	-0.5958535	37.6	-0.5834158	37.6	-0.5754427	37.6	-0.5909739
37.8	-0.6443748	37.8	-0.6840814	37.8	-0.6678625	37.8	-0.6453488	37.8	-0.661198	37.8	-0.6610976	37.8	-0.6578306	37.8	-0.6496983	37.8	-0.6081101	37.8	-0.6287338	37.8	-0.6120833	37.8	-0.6076971	37.8	-0.5837671	37.8	-0.5757321	37.8	-0.5670951	37.8	-0.5853981
38	-0.6370054	38	-0.6781372	38	-0.6623625	38	-0.6359767	38	-0.6525667	38	-0.6552239	38	-0.6528407	38	-0.6442791	38	-0.604455	38	-0.6187444	38	-0.6038501	38	-0.6058388	38	-0.5751503	38	-0.5652304	38	-0.5595431	38	-0.5754967
38.2	-0.6320062	38.2	-0.6788716	38.2	-0.6566429	38.2	-0.6310461	38.2	-0.6441137	38.2	-0.6464324	38.2	-0.6486429	38.2	-0.632339	38.2	-0.5963496	38.2	-0.6122378	38.2	-0.5981457	38.2	-0.591957	38.2	-0.5760048	38.2	-0.5594985	38.2	-0.5531331	38.2	-0.5697281
38.4	-0.6208392	38.4	-0.6712415	38.4	-0.6479534	38.4	-0.633736	38.4	-0.6415683	38.4	-0.6394106	38.4	-0.6384472	38.4	-0.6339293	38.4	-0.5864923	38.4	-0.6023815	38.4	-0.5942944	38.4	-0.5867539	38.4	-0.5644609	38.4	-0.5516787	38.4	-0.5435729	38.4	-0.5602964
38.6	-0.6188903	38.6	-0.6579325	38.6	-0.639922	38.6	-0.6185405	38.6	-0.6350645	38.6	-0.6373876	38.6	-0.6339542	38.6	-0.624065	38.6	-0.5817987	38.6	-0.6012545	38.6	-0.5879518	38.6	-0.579834	38.6	-0.5610258	38.6	-0.5477096	38.6	-0.5393624	38.6	-0.5591618
38.8	-0.614633	38.8	-0.6537953	38.8	-0.6361704	38.8	-0.6136853	38.8	-0.6272205	38.8	-0.630471	38.8	-0.6295468	38.8	-0.6172507	38.8	-0.579564	38.8	-0.5918509	38.8	-0.5823061	38.8	-0.5787473	38.8	-0.5554565	38.8	-0.5394427	38.8	-0.5300396	38.8	-0.550238
39	-0.6005464	39	-0.649806	39	-0.6281049	39	-0.6105784	39	-0.6240668	39	-0.620409	39	-0.6234299	39	-0.611068	39	-0.5696185	39	-0.5849344	39	-0.571423	39	-0.5717597	39	-0.5498567	39	-0.5315267	39	-0.5310464	39	-0.5455344
39.2	-0.6005608	39.2	-0.6430059	39.2	-0.623989	39.2	-0.6000326	39.2	-0.6197957	39.2	-0.6136155	39.2	-0.6208408	39.2	-0.6074569	39.2	-0.5628591	39.2	-0.5833675	39.2	-0.5665002	39.2	-0.5663533	39.2	-0.5473371	39.2	-0.5288234	39.2	-0.5221828	39.2	-0.5415962
39.4	-0.5970514	39.4	-0.6378691	39.4	-0.6198577	39.4	-0.6016911	39.4	-0.6127404	39.4	-0.613028	39.4	-0.608706	39.4	-0.603613	39.4	-0.5622692	39.4	-0.5776025	39.4	-0.5621998	39.4	-0.5572011	39.4	-0.5397307	39.4	-0.5241672	39.4	-0.5187808	39.4	-0.5362512
39.6	-0.592607	39.6	-0.6344038	39.6	-0.6129972	39.6	-0.595527	39.6	-0.6098701	39.6	-0.6068869	39.6	-0.6076424	39.6	-0.5968714	39.6	-0.5603362	39.6	-0.5710693	39.6	-0.5525173	39.6	-0.5576895	39.6	-0.539489	39.6	-0.516029	39.6	-0.5150548	39.6	-0.5290954
39.8	-0.5842704	39.8	-0.6345595	39.8	-0.6141161	39.8	-0.5924765	39.8	-0.6059684	39.8	-0.6053096	39.8	-0.6079299	39.8	-0.5950976	39.8	-0.5532389	39.8	-0.5698513	39.8	-0.5555961	39.8	-0.5531917	39.8	-0.5319625	39.8	-0.5156178	39.8	-0.5153109	39.8	-0.5247051
40	-4.843198	40	-4.765224	40	-4.826142	40	-4.682127	40	-4.722151	40	-4.776546	40	-4.917895	40	-4.723368	40	-4.690029	40	-4.763355	40	-4.749948	40	-4.701027	40	-4.515365	40	-4.60431	40	-4.512864	40	-4.574056
40.2	-4.912445	40.2	-4.872494	40.2	-4.925717	40.2	-4.790012	40.2	-4.841176	40.2	-4.892109	40.2	-4.985955	40.2	-4.831674	40.2	-4.752704	40.2	-4.841892	40.2	-4.819943	40.2	-4.777097	40.2	-4.593068	40.2	-4.686508	40.2	-4.582619	40.2	-4.648462
40.4	-4.95848	40.4	-4.947823	40.4	-4.993193	40.4	-4.85991	40.4	-4.902542	40.4	-4.95875	40.4	-5.030568	40.4	-4.898562	40.4	-4.806218	40.4	-4.897679	40.4	-4.871176	40.4	-4.832645	40.4	-4.646962	40.4	-4.74565	40.4	-4.636234	40.4	-4.700143
40.6	-4.994969	40.6	-4.992442	40.6	-5.036588	40.6	-4.911202	40.6	-4.945508	40.6	-5.004169	40.6	-5.074908	40.6	-4.945253	40.6	-4.841841	40.6	-4.944706	40.6	-4.912507	40.6	-4.874134	40.6	-4.681959	40.6	-4.788128	40.6	-4.67942	40.6	-4.74341
40.8	-5.02045	40.8	-5.032447	40.8	-5.073492	40.8	-4.94865	40.8	-4.988022	40.8	-5.041995	40.8	-5.099046	40.8	-4.976376	40.8	-4.869315	40.8	-4.970713	40.8	-4.946396	40.8	-4.90653	40.8	-4.716573	40.8	-4.819003	40.8	-4.711558	40.8	-4.775862
41	-5.047717	41	-5.062567	41	-5.104315	41	-4.977039	41	-5.017852	41	-5.072864	41	-5.129086	41	-5.008864	41	-4.90046	41	-5.005671	41	-4.974541	41	-4.93471	41	-4.748436	41	-4.848522	41	-4.741241	41	-4.802569
41.2	-5.069289	41.2	-5.084714	41.2	-5.131169	41.2	-5.00985	41.2	-5.040401	41.2	-5.100368	41.2	-5.1533	41.2	-5.039256	41.2	-4.922358	41.2	-5.03048	41.2	-4.993666	41.2	-4.953343	41.2	-4.7654	41.2	-4.868981	41.2	-4.764456	41.2	-4.82733
41.4	-5.092278	41.4	-5.111292	41.4	-5.15519	41.4	-5.025366	41.4	-5.06541	41.4	-5.127095	41.4	-5.170381	41.4	-5.057682	41.4	-4.94373	41.4	-5.050581	41.4	-5.019478	41.4	-4.979322	41.4	-4.789853	41.4	-4.891573	41.4	-4.789426	41.4	-4.844658
41.6	-5.100017	41.6	-5.135334	41.6	-5.172979	41.6	-5.049629	41.6	-5.092052	41.6	-5.141797	41.6	-5.188201	41.6	-5.073655	41.6	-4.957752	41.6	-5.074413	41.6	-5.035508	41.6	-5.001545	41.6	-4.809159	41.6	-4.917743	41.6	-4.805336	41.6	-4.86899
41.8	-5.122323	41.8	-5.154846	41.8	-5.190859	41.8	-5.069669	41.8	-5.107172	41.8	-5.16488	41.8	-5.208374	41.8	-5.092632	41.8	-4.977027	41.8	-5.088844	41.8	-5.048095	41.8	-5.010245	41.8	-4.824395	41.8	-4.928352	41.8	-4.822395	41.8	-4.87824
42	-5.136899	42	-5.167788	42	-5.209064	42	-5.087533	42	-5.121942	42	-5.181059	42	-5.222226	42	-5.111825	42	-4.994929	42	-5.099028	42	-5.068832	42	-5.035421	42	-4.838473	42	-4.947601	42	-4.84104	42	-4.896116
42.2	-5.150392	42.2	-5.183356	42.2	-5.223173	42.2	-5.098357	42.2	-5.140252	42.2	-5.202879	42.2	-5.236593	42.2	-5.128537	42.2	-5.007808	42.2	-5.123504	42.2	-5.082984	42.2	-5.049869	42.2	-4.853527	42.2	-4.962571	42.2	-4.853986	42.2	-4.907772
42.4	-5.158441	42.4	-5.203465	42.4	-5.238595	42.4	-5.116359	42.4	-5.150953	42.4	-5.208699	42.4	-5.253948	42.4	-5.140722	42.4	-5.017636	42.4	-5.134171	42.4	-5.097605	42.4	-5.059556	42.4	-4.868278	42.4	-4.968399	42.4	-4.868124	42.4	-4.922796
42.6	-5.173392	42.6	-5.220191	42.6	-5.250862	42.6	-5.129863	42.6	-5.159502	42.6	-5.222538	42.6	-5.261327	42.6	-5.154769	42.6	-5.031999	42.6	-5.142081	42.6	-5.105505	42.6	-5.068509	42.6	-4.876712	42.6	-4.986144	42.6	-4.879509	42.6	-4.941546
42.8	-5.183461	42.8	-5.225939	42.8	-5.26562	42.8	-5.144664	42.8	-5.17592	42.8	-5.238211	42.8	-5.278325	42.8	-5.164149	42.8	-5.046204	42.8	-5.154479	42.8	-5.117047	42.8	-5.082691	42.8	-4.892964	42.8	-4.99872	42.8	-4.886971	42.8	-4.947453
43	-5.190533	43	-5.238645	43	-5.275186	43	-5.153306	43	-5.184881	43	-5.247661	43	-5.284957	43	-5.176717	43	-5.052814	43	-5.169699	43	-5.126806	43	-5.097192	43	-4.902695	43	-5.005397	43	-4.903103	43	-4.957815
43.2	-5.206021	43.2	-5.250847	43.2	-5.288188	43.2	-5.167258	43.2	-5.200492	43.2	-5.257939	43.2	-5.298741	43.2	-5.190719	43.2	-5.062716	43.2	-5.17732	43.2	-5.138797	43.2	-5.102917	43.2	-4.906579	43.2	-5.017286	43.2	-4.905034	43.2	-4.970323
43.4	-5.217078	43.4	-5.258804	43.4	-5.30007	43.4	-5.16985	43.4	-5.211178	43.4	-5.271472	43.4	-5.303607	43.4	-5.206066	43.4	-5.073342	43.4	-5.187937	43.4	-5.144304	43.4	-5.111992	43.4	-4.922882	43.4	-5.029862	43.4	-4.924249	43.4	-4.978941
43.6	-5.225735	43.6	-5.271698	43.6	-5.308402	43.6	-5.188087	43.6	-5.222733	43.6	-5.279454	43.6	-5.314602	43.6	-5.213789	43.6	-5.080282	43.6	-5.193945	43.6	-5.157197	43.6	-5.125338	43.6	-4.926654	43.6	-5.035855	43.6	-4.934183	43.6	-4.983869
43.8	-5.234196	43.8	-5.280073	43.8	-5.317881	43.8	-5.195833	43.8	-5.231121	43.8	-5.289915	43.8	-5.322938	43.8	-5.216241	43.8	-5.087917	43.8	-5.205881	43.8	-5.163585	43.8	-5.132852	43.8	-4.934063	43.8	-5.043249	43.8	-4.941132	43.8	-4.998012
44	-5.241565	44	-5.292346	44	-5.329175	44	-5.203661	44	-5.246841	44	-5.302989	44	-5.326043	44	-5.231936	44	-5.104476	44	-5.205497	44	-5.172525	44	-5.141317	44	-4.955112	44	-5.053896	44	-4.943892	44	-5.002038
44.2	-5.254288	44.2	-5.300147	44.2	-5.337011	44.2	-5.21565	44.2	-5.247435	44.2	-5.309062	44.2	-5.338411	44.2	-5.239284	44.2	-5.107771	44.2	-5.216657	44.2	-5.185852	44.2	-5.148402	44.2	-4.949759	44.2	-5.06355	44.2	-4.954876	44.2	-5.013588
44.4	-5.257595	44.4	-5.30999	44.4	-5.341511	44.4	-5.219338	44.4	-5.253417	44.4	-5.311208	44.4	-5.339205	44.4	-5.246479	44.4	-5.111483	44.4	-5.229813	44.4	-5.18901	44.4	-5.1564	44.4	-4.95769	44.4	-5.068022	44.4	-4.962995	44.4	-5.016976
44.6	-5.264642	44.6	-5.313312	44.6	-5.352131	44.6	-5.222841	44.6	-5.26924	44.6	-5.324116	44.6	-5.347145	44.6	-5.256783	44.6	-5.118478	44.6	-5.2339	44.6	-5.198574	44.6	-5.163577	44.6	-4.964002	44.6	-5.073995	44.6	-4.967837	44.6	-5.026568
44.8	-5.268042	44.8	-5.318666	44.8	-5.358744	44.8	-5.23015	44.8	-5.268563	44.8	-5.328907	44.8	-5.35458	44.8	-5.258323	44.8	-5.126582	44.8	-5.237697	44.8	-5.195827	44.8	-5.166866	44.8	-4.969276	44.8	-5.07557	44.8	-4.9735	44.8	-5.024411
45	-0.8446712	45	-0.8970192	45	-0.8632354	45	-0.8396799	45	-0.8648709	45	-0.861312	45	-0.849691	45	-0.8435137	45	-0.8199994	45	-0.853045	45	-0.8232522	45	-0.8091578	45	-0.7876995	45	-0.7715626	45	-0.7557114	45	-0.7817065
45.2	-0.8135321	45.2	-0.8664111	45.2	-0.8293968	45.2	-0.8057095	45.2	-0.831335	45.2	-0.8265596	45.2	-0.8192444	45.2	-0.8131759	45.2	-0.7898301	45.2	-0.8170034	45.2	-0.7881444	45.2	-0.7783447	45.2	-0.7496386	45.2	-0.7356585	45.2	-0.7297589	45.2	-0.7456064
45.4	-0.7850727	45.4	-0.8373847	45.4	-0.8122842	45.4	-0.7826393	45.4	-0.8056352	45.4	-0.8002593	45.4	-0.7963897	45.4	-0.7853988	45.4	-0.7602162	45.4	-0.7878985	45.4	-0.7591962	45.4	-0.7523418	45.4	-0.7228488	45.4	-0.7126705	45.4	-0.6958202	45.4	-0.7196321
45.6	-0.7655247	45.6	-0.8149343	45.6	-0.7877994	45.6	-0.7627711	45.6	-0.7833768	45.6	-0.7805195	45.6	-0.7725807	45.6	-0.7686042	45.6	-0.7341731	45.6	-0.7669721	45.6	-0.7382097	45.6	-0.729022	45.6	-0.7046166	45.6	-0.6850548	45.6	-0.6784483	45.6	-0.6989015
45.8	-0.7475616	45.8	-0.7992418	45.8	-0.7722793	45.8	-0.7494212	45.8	-0.7674753	45.8	-0.7623888	45.8	-0.7560391	45.8	-0.7501222	45.8	-0.7187747	45.8	-0.7478838	45.8	-0.718219	45.8	-0.7057899	45.8	-0.6821293	45.8	-0.666986	45.8	-0.6573237	45.8	-0.6776454
46	-0.7275146	46	-0.7888242	46	-0.7526318	46	-0.7344936	46	-0.7510669	46	-0.7460719	46	-0.7387825	46	-0.7319992	46	-0.703554	46	-0.7307917	46	-0.6995343	46	-0.6925791	46	-0.6600955	46	-0.6472925	46	-0.6411407	46	-0.6625393
46.2	-0.7105334	46.2	-0.7711869	46.2	-0.7365656	46.2	-0.7135937	46.2	-0.7378573	46.2	-0.730985	46.2	-0.7256603	46.2	-0.7196876	46.2	-0.6856336	46.2	-0.7146395	46.2	-0.688437	46.2	-0.6793379	46.2	-0.6486963	46.2	-0.6388437	46.2	-0.6255586	46.2	-0.6480145
46.4	-0.7002033	46.4	-0.7560562	46.4	-0.72959	46.4	-0.698913	46.4	-0.7244689	46.4	-0.7185555	46.4	-0.7112859	46.4	-0.7101213	46.4	-0.6708673	46.4	-0.701997	46.4	-0.6741164	46.4	-0.6658964	46.4	-0.6394034	46.4	-0.6250376	46.4	-0.617671	46.4	-0.6318196
46.6	-0.6897712	46.6	-0.7465883	46.6	-0.7163103	46.6	-0.6911832	46.6	-0.7165695	46.6	-0.7059199	46.6	-0.70071	46.6	-0.6941613	46.6	-0.6621107	46.6	-0.6922127	46.6	-0.6621256	46.6	-0.6559303	46.6	-0.6270886	46.6	-0.6107785	46.6	-0.6000156	46.6	-0.6223837
46.8	-0.6809437	46.8	-0.7381771	46.8	-0.7041715	46.8	-0.6815695	46.8	-0.7006308	46.8	-0.689964	46.8	-0.694143	46.8	-0.6896528	46.8	-0.6485371	46.8	-0.6777793	46.8	-0.652223	46.8	-0.6427655	46.8	-0.6174276	46.8	-0.5965437	46.8	-0.5889813	46.8	-0.6145401
47	-0.6675566	47	-0.7273055	47	-0.6961152	47	-0.6671212	47	-0.6923529	47	-0.6896671	47	-0.6801783	47	-0.6788386	47	-0.6438006	47	-0.6711997	47	-0.6408516	47	-0.6338599	47	-0.6160462	47	-0.5889791	47	-0.5809873	47	-0.6024294
47.2	-0.66018	47.2	-0.7161013	47.2	-0.6847377	47.2	-0.663249	47.2	-0.6897156	47.2	-0.6771514	47.2	-0.6726443	47.2	-0.6666054	47.2	-0.6311134	47.2	-0.65881	47.2	-0.6331432	47.2	-0.6216332	47.2	-0.5971093	47.2	-0.580036	47.2	-0.5712273	47.2	-0.5964598
47.4	-0.6520501	47.4	-0.7091056	47.4	-0.6785251	47.4	-0.6518683	47.4	-0.6745822	47.4	-0.6676819	47.4	-0.6619622	47.4	-0.6526996	47.4	-0.6242073	47.4	-0.6514182	47.4	-0.626461	47.4	-0.6227848	47.4	-0.5913457	47.4	-0.5686948	47.4	-0.5616994	47.4	-0.5845284
47.6	-0.6421164	47.6	-0.7010741	47.6	-0.6712005	47.6	-0.6438106	47.6	-0.6668571	47.6	-0.6637871	47.6	-0.6554753	47.6	-0.6502171	47.6	-0.6179007	47.6	-0.6472911	47.6	-0.6194353	47.6	-0.6117081	47.6	-0.5818235	47.6	-0.5595539	47.6	-0.5562162	47.6	-0.5747369
47.8	-0.6366309	47.8	-0.6923814	47.8	-0.6627408	47.8	-0.6360712	47.8	-0.6634133	47.8	-0.6552175	47.8	-0.6478984	47.8	-0.6420022	47.8	-0.613331	47.8	-0.6401331	47.8	-0.6126725	47.8	-0.5996283	47.8	-0.5728177	47.8	-0.5544837	47.8	-0.5527914	47.8	-0.5772418
48	-0.6324368	48	-0.6849289	48	-0.6574619	48	-0.6262916	48	-0.6555862	48	-0.6455948	48	-0.639882	48	-0.6379879	48	-0.5992062	48	-0.6308079	48	-0.6024629	48	-0.5955562	48	-0.5694849	48	-0.5478826	48	-0.5457558	48	-0.5667923
48.2	-0.6252216	48.2	-0.6802377	48.2	-0.6484884	48.2	-0.6269501	48.2	-0.6478668	48.2	-0.642043	48.2	-0.6362715	48.2	-0.63144	48.2	-0.5963058	48.2	-0.6243026	48.2	-0.5982562	48.2	-0.5857511	48.2	-0.5614918	48.2	-0.5404659	48.2	-0.5325316	48.2	-0.5607144
48.4	-0.617318	48.4	-0.6734082	48.4	-0.6451256	48.4	-0.6180411	48.4	-0.6425547	48.4	-0.6366979	48.4	-0.6279306	48.4	-0.6213962	48.4	-0.588004	48.4	-0.6200653	48.4	-0.5912762	48.4	-0.5877742	48.4	-0.5555794	48.4	-0.541931	48.4	-0.532794	48.4	-0.5556081
48.6	-0.6129649	48.6	-0.6629138	48.6	-0.6389434	48.6	-0.6149943	48.6	-0.6363396	48.6	-0.6286002	48.6	-0.6229317	48.6	-0.6210238	48.6	-0.5800812	48.6	-0.610415	48.6	-0.5869395	48.6	-0.5749207	48.6	-0.5503902	48.6	-0.5331818	48.6	-0.5219293	48.6	-0.5456341
48.8	-0.6062395	48.8	-0.6628178	48.8	-0.6327795	48.8	-0.6114814	48.8	-0.6296012	48.8	-0.6206331	48.8	-0.6127956	48.8	-0.6169599	48.8	-0.5781208	48.8	-0.6025523	48.8	-0.5750747	48.8	-0.5720864	48.8	-0.5462088	48.8	-0.5205297	48.8	-0.5192091	48.8	-0.5431954
49	-0.6003369	49	-0.6575688	49	-0.6246233	49	-0.6034874	49	-0.6200818	49	-0.6151298	49	-0.6121807	49	-0.6047074	49	-0.5681009	49	-0.6015288	49	-0.5748337	49	-0.5661525	49	-0.539984	49	-0.5226031	49	-0.5148042	49	-0.5346185
49.2	-0.5938398	49.2	-0.6498395	49.2	-0.6178588	49.2	-0.5899233	49.2	-0.6197753	49.2	-0.6067855	49.2	-0.6064205	49.2	-0.6028071	49.2	-0.568895	49.2	-0.5918909	49.2	-0.5678283	49.2	-0.5594364	49.2	-0.5374213	49.2	-0.5112025	49.2	-0.5108126	49.2	-0.5281076
49.4	-0.5917792	49.4	-0.642749	49.4	-0.6141074	49.4	-0.5904908	49.4	-0.6115591	49.4	-0.6027622	49.4	-0.6027579	49.4	-0.597912	49.4	-0.5660222	49.4	-0.5877522	49.4	-0.5659754	49.4	-0.5579545	49.4	-0.5276874	49.4	-0.5087155	49.4	-0.5005947	49.4	-0.5267999
49.6	-0.585347	49.6	-0.6424744	49.6	-0.6143541	49.6	-0.5887332	49.6	-0.6106469	49.6	-0.6018977	49.6	-0.5953842	49.6	-0.5899498	49.6	-0.5614794	49.6	-0.5834136	49.6	-0.5637286	49.6	-0.5526775	49.6	-0.5243092	49.6	-0.5011408	49.6	-0.5014517	49.6	-0.5221422
49.8	-0.586147	49.8	-0.6396917	49.8	-0.6065795	49.8	-0.5838789	49.8	-0.604821	49.8	-0.5989643	49.8	-0.5961087	49.8	-0.5922034	49.8	-0.5558014	49.8	-0.5806551	49.8	-0.5588908	49.8	-0.5511529	49.8	-0.5238017	49.8	-0.501322	49.8	-0.4968202	49.8	-0.5221187
50	-4.869027	50	-4.80973	50	-4.861665	50	-4.720602	50	-4.774837	50	-4.81679	50	-4.810942	50	-4.755584	50	-4.718699	50	-4.813711	50	-4.780434	50	-4.727036	50	-4.530376	50	-4.628736	50	-4.527124	50	-4.593222
50.2	-4.931054	50.2	-4.917913	50.2	-4.958649	50.2	-4.826989	50.2	-4.870376	50.2	-4.919897	50.2	-4.91583	50.2	-4.858388	50.2	-4.775878	50.2	-4.880301	50.2	-4.847102	50.2	-4.807423	50.2	-4.61649	50.2	-4.696194	50.2	-4.599244	50.2	-4.669398
50.4	-4.978636	50.4	-4.982831	50.4	-5.015701	50.4	-4.888538	50.4	-4.94239	50.4	-4.980151	50.4	-4.9734	50.4	-4.920074	50.4	-4.816096	50.4	-4.92896	50.4	-4.893343	50.4	-4.856134	50.4	-4.658677	50.4	-4.752164	50.4	-4.655236	50.4	-4.708456
50.6	-5.007928	50.6	-5.031934	50.6	-5.056774	50.6	-4.92866	50.6	-4.97886	50.6	-5.03125	50.6	-5.019028	50.6	-4.964382	50.6	-4.86217	50.6	-4.976013	50.6	-4.924521	50.6	-4.888009	50.6	-4.691507	50.6	-4.796757	50.6	-4.682388	50.6	-4.750002
50.8	-5.034116	50.8	-5.058157	50.8	-5.0902	50.8	-4.967209	50.8	-5.008895	50.8	-5.063209	50.8	-5.057837	50.8	-4.997972	50.8	-4.886582	50.8	-4.999783	50.8	-4.956322	50.8	-4.923414	50.8	-4.726207	50.8	-4.814809	50.8	-4.720962	50.8	-4.781401
51	-5.056788	51	-5.090029	51	-5.123007	51	-4.994636	51	-5.042523	51	-5.092276	51	-5.082116	51	-5.027149	51	-4.907358	51	-5.024573	51	-4.983464	51	-4.943327	51	-4.753492	51	-4.841424	51	-4.744018	51	-4.804194
51.2	-5.070226	51.2	-5.11561	51.2	-5.141568	51.2	-5.02033	51.2	-5.063267	51.2	-5.117722	51.2	-5.104618	51.2	-5.046594	51.2	-4.930684	51.2	-5.051755	51.2	-5.001886	51.2	-4.96951	51.2	-4.763758	51.2	-4.865939	51.2	-4.767375	51.2	-4.825026
51.4	-5.094113	51.4	-5.131063	51.4	-5.161379	51.4	-5.042772	51.4	-5.086341	51.4	-5.129122	51.4	-5.126709	51.4	-5.068038	51.4	-4.948762	51.4	-5.070511	51.4	-5.027348	51.4	-4.985949	51.4	-4.78688	51.4	-4.886261	51.4	-4.780588	51.4	-4.844035
51.6	-5.106369	51.6	-5.156351	51.6	-5.182331	51.6	-5.057432	51.6	-5.102488	51.6	-5.154029	51.6	-5.142112	51.6	-5.085379	51.6	-4.968931	51.6	-5.084208	51.6	-5.040438	51.6	-5.001326	51.6	-4.807811	51.6	-4.902826	51.6	-4.794603	51.6	-4.855277
51.8	-5.124708	51.8	-5.166858	51.8	-5.197009	51.8	-5.074973	51.8	-5.116586	51.8	-5.171738	51.8	-5.157119	51.8	-5.10006	51.8	-4.981344	51.8	-5.099491	51.8	-5.050818	51.8	-5.017781	51.8	-4.814485	51.8	-4.912889	51.8	-4.814158	51.8	-4.869954
52	-5.129743	52	-5.179795	52	-5.210215	52	-5.086904	52	-5.129351	52	-5.178246	52	-5.168645	52	-5.11203	52	-4.995667	52	-5.111699	52	-5.070803	52	-5.035912	52	-4.829559	52	-4.923671	52	-4.828979	52	-4.885678
52.2	-5.144073	52.2	-5.194321	52.2	-5.225596	52.2	-5.102225	52.2	-5.144817	52.2	-5.195892	52.2	-5.185129	52.2	-5.13188	52.2	-5.006062	52.2	-5.125369	52.2	-5.080778	52.2	-5.036245	52.2	-4.846043	52.2	-4.939982	52.2	-4.839221	52.2	-4.898063
52.4	-5.156028	52.4	-5.215558	52.4	-5.235226	52.4	-5.112701	52.4	-5.160811	52.4	-5.21297	52.4	-5.202668	52.4	-5.143886	52.4	-5.016082	52.4	-5.137187	52.4	-5.088773	52.4	-5.058569	52.4	-4.851502	52.4	-4.953175	52.4	-4.846228	52.4	-4.910708
52.6	-5.168481	52.6	-5.220858	52.6	-5.251151	52.6	-5.126091	52.6	-5.166884	52.6	-5.224185	52.6	-5.209503	52.6	-5.146837	52.6	-5.023674	52.6	-5.147517	52.6	-5.103388	52.6	-5.063546	52.6	-4.861943	52.6	-4.962125	52.6	-4.861007	52.6	-4.922141
52.8	-5.173503	52.8	-5.233444	52.8	-5.262802	52.8	-5.138943	52.8	-5.182329	52.8	-5.23332	52.8	-5.227097	52.8	-5.167549	52.8	-5.032009	52.8	-5.157943	52.8	-5.108081	52.8	-5.073854	52.8	-4.87421	52.8	-4.973682	52.8	-4.868653	52.8	-4.929013
53	-5.187865	53	-5.241906	53	-5.266387	53	-5.1485	53	-5.193321	53	-5.24448	53	-5.239464	53	-5.17205	53	-5.044277	53	-5.168087	53	-5.11801	53	-5.082191	53	-4.877337	53	-4.978438	53	-4.880443	53	-4.943218
53.2	-5.189492	53.2	-5.251145	53.2	-5.277775	53.2	-5.156718	53.2	-5.202639	53.2	-5.258942	53.2	-5.242834	53.2	-5.181339	53.2	-5.055158	53.2	-5.17067	53.2	-5.125107	53.2	-5.091533	53.2	-4.886925	53.2	-4.985739	53.2	-4.889637	53.2	-4.951087
53.4	-5.200871	53.4	-5.259834	53.4	-5.287215	53.4	-5.162145	53.4	-5.211415	53.4	-5.262344	53.4	-5.253724	53.4	-5.188943	53.4	-5.057131	53.4	-5.186923	53.4	-5.13313	53.4	-5.099566	53.4	-4.900502	53.4	-4.998436	53.4	-4.895969	53.4	-4.955488
53.6	-5.209713	53.6	-5.269	53.6	-5.298501	53.6	-5.178217	53.6	-5.214588	53.6	-5.266019	53.6	-5.258462	53.6	-5.203985	53.6	-5.07178	53.6	-5.190539	53.6	-5.138602	53.6	-5.107539	53.6	-4.905202	53.6	-5.003932	53.6	-4.899946	53.6	-4.961912
53.8	-5.218395	53.8	-5.280321	53.8	-5.301986	53.8	-5.181715	53.8	-5.224891	53.8	-5.278724	53.8	-5.268171	53.8	-5.207238	53.8	-5.074514	53.8	-5.195887	53.8	-5.148218	53.8	-5.115972	53.8	-4.907252	53.8	-5.010127	53.8	-4.910416	53.8	-4.970945
54	-5.2242	54	-5.282421	54	-5.313487	54	-5.188848	54	-5.22869	54	-5.287516	54	-5.274591	54	-5.216812	54	-5.080777	54	-5.205858	54	-5.152882	54	-5.119829	54	-4.920751	54	-5.017774	54	-4.917226	54	-4.975264
54.2	-5.230778	54.2	-5.295565	54.2	-5.325581	54.2	-5.190475	54.2	-5.238862	54.2	-5.294466	54.2	-5.28523	54.2	-5.216321	54.2	-5.084955	54.2	-5.211796	54.2	-5.157518	54.2	-5.127484	54.2	-4.927711	54.2	-5.023014	54.2	-4.926483	54.2	-4.982151
54.4	-5.237588	54.4	-5.299931	54.4	-5.327333	54.4	-5.204213	54.4	-5.23937	54.4	-5.298376	54.4	-5.291296	54.4	-5.227155	54.4	-5.091451	54.4	-5.217762	54.4	-5.16769	54.4	-5.136849	54.4	-4.929076	54.4	-5.030939	54.4	-4.932685	54.4	-4.986095
54.6	-5.240283	54.6	-5.3081	54.6	-5.332983	54.6	-5.20694	54.6	-5.247385	54.6	-5.30497	54.6	-5.297159	54.6	-5.229785	54.6	-5.097372	54.6	-5.221838	54.6	-5.173542	54.6	-5.138097	54.6	-4.93825	54.6	-5.039248	54.6	-4.934908	54.6	-4.990314
54.8	-5.243501	54.8	-5.310493	54.8	-5.3376	54.8	-5.214239	54.8	-5.255597	54.8	-5.313269	54.8	-5.301763	54.8	-5.236588	54.8	-5.098937	54.8	-5.228367	54.8	-5.174945	54.8	-5.144341	54.8	-4.941687	54.8	-5.040189	54.8	-4.938945	54.8	-4.994986
55	-0.7871878	55	-0.8543567	55	-0.8080782	55	-0.787055	55	-0.8204941	55	-0.8026901	55	-0.7892035	55	-0.7992983	55	-0.7703909	55	-0.8235514	55	-0.7740195	55	-0.754627	55	-0.7235598	55	-0.7010196	55	-0.694066	55	-0.7186689
55.2	-0.7541316	55.2	-0.825444	55.2	-0.7834978	55.2	-0.7599553	55.2	-0.7898228	55.2	-0.7750034	55.2	-0.7568076	55.2	-0.7676184	55.2	-0.7365489	55.2	-0.793174	55.2	-0.743775	55.2	-0.7250836	55.2	-0.6924677	55.2	-0.6643978	55.2	-0.6686488	55.2	-0.6860011
55.4	-0.7277397	55.4	-0.7975423	55.4	-0.761161	55.4	-0.7377186	55.4	-0.7640983	55.4	-0.7500694	55.4	-0.7294022	55.4	-0.741006	55.4	-0.7103816	55.4	-0.7609957	55.4	-0.7138712	55.4	-0.7032278	55.4	-0.6625528	55.4	-0.6472145	55.4	-0.6315596	55.4	-0.6619473
55.6	-0.7126869	55.6	-0.7777827	55.6	-0.7358044	55.6	-0.7099985	55.6	-0.7453305	55.6	-0.7309628	55.6	-0.7140229	55.6	-0.7196094	55.6	-0.6945223	55.6	-0.7383785	55.6	-0.6910172	55.6	-0.6791981	55.6	-0.6451846	55.6	-0.6190566	55.6	-0.6134189	55.6	-0.6390311
55.8	-0.6878862	55.8	-0.7573396	55.8	-0.7191973	55.8	-0.7034022	55.8	-0.7241188	55.8	-0.7094874	55.8	-0.6934941	55.8	-0.7070845	55.8	-0.6704881	55.8	-0.7164417	55.8	-0.6782383	55.8	-0.6614429	55.8	-0.6218039	55.8	-0.5974626	55.8	-0.5925136	55.8	-0.6232047
56	-0.6728742	56	-0.7486831	56	-0.7009331	56	-0.6795676	56	-0.7117019	56	-0.6967963	56	-0.6780754	56	-0.6906016	56	-0.6608997	56	-0.7033042	56	-0.6582783	56	-0.6434444	56	-0.6117846	56	-0.5853046	56	-0.5766393	56	-0.6069211
56.2	-0.6582476	56.2	-0.7317598	56.2	-0.6906827	56.2	-0.6658944	56.2	-0.6954845	56.2	-0.6822915	56.2	-0.665159	56.2	-0.6725453	56.2	-0.6377164	56.2	-0.6888451	56.2	-0.6492769	56.2	-0.6250033	56.2	-0.5967489	56.2	-0.5672271	56.2	-0.5709179	56.2	-0.5911847
56.4	-0.6423786	56.4	-0.7178421	56.4	-0.6746863	56.4	-0.6561423	56.4	-0.6794087	56.4	-0.6679912	56.4	-0.6521227	56.4	-0.6611576	56.4	-0.6281503	56.4	-0.6732566	56.4	-0.6314281	56.4	-0.6183079	56.4	-0.5816891	56.4	-0.5495552	56.4	-0.5564581	56.4	-0.5801785
56.6	-0.6353165	56.6	-0.7054502	56.6	-0.6659234	56.6	-0.6459006	56.6	-0.6673431	56.6	-0.6537995	56.6	-0.6424685	56.6	-0.6485835	56.6	-0.6156155	56.6	-0.6584814	56.6	-0.6183877	56.6	-0.6041693	56.6	-0.5738603	56.6	-0.5433932	56.6	-0.5388408	56.6	-0.5683138
56.8	-0.6263604	56.8	-0.6955451	56.8	-0.6519548	56.8	-0.633124	56.8	-0.660745	56.8	-0.6469324	56.8	-0.6318868	56.8	-0.6374263	56.8	-0.6034622	56.8	-0.6505163	56.8	-0.6075792	56.8	-0.5903109	56.8	-0.5586247	56.8	-0.5376263	56.8	-0.5301189	56.8	-0.558899
57	-0.6136434	57	-0.6872907	57	-0.6423622	57	-0.6230455	57	-0.6482579	57	-0.6358485	57	-0.6181033	57	-0.6325936	57	-0.5900993	57	-0.6409782	57	-0.5969411	57	-0.5860918	57	-0.5482163	57	-0.5278014	57	-0.5217317	57	-0.5463187
57.2	-0.6035693	57.2	-0.6759083	57.2	-0.6394579	57.2	-0.6182373	57.2	-0.6426278	57.2	-0.626148	57.2	-0.6082509	57.2	-0.6239921	57.2	-0.5856073	57.2	-0.6350067	57.2	-0.5962915	57.2	-0.5811775	57.2	-0.5478007	57.2	-0.5116284	57.2	-0.5115743	57.2	-0.5393717
57.4	-0.5958587	57.4	-0.6707453	57.4	-0.6299192	57.4	-0.6058558	57.4	-0.6359794	57.4	-0.6198703	57.4	-0.6001427	57.4	-0.6167294	57.4	-0.5753346	57.4	-0.6212012	57.4	-0.5813386	57.4	-0.5670152	57.4	-0.5323809	57.4	-0.5109552	57.4	-0.5023392	57.4	-0.5281665
57.6	-0.5879736	57.6	-0.6597366	57.6	-0.6175859	57.6	-0.6011253	57.6	-0.6246504	57.6	-0.611354	57.6	-0.5979968	57.6	-0.6065457	57.6	-0.5700939	57.6	-0.6123896	57.6	-0.5738814	57.6	-0.5564771	57.6	-0.5267455	57.6	-0.4990303	57.6	-0.5008537	57.6	-0.5212367
57.8	-0.5791731	57.8	-0.6549949	57.8	-0.6078515	57.8	-0.5896364	57.8	-0.6195384	57.8	-0.604804	57.8	-0.5872291	57.8	-0.5980542	57.8	-0.5598195	57.8	-0.6069492	57.8	-0.5681804	57.8	-0.5547008	57.8	-0.5211673	57.8	-0.492298	57.8	-0.4885136	57.8	-0.5181279
58	-0.5738638	58	-0.648533	58	-0.608429	58	-0.5875522	58	-0.6129477	58	-0.5949026	58	-0.5804932	58	-0.5902964	58	-0.5543252	58	-0.5974492	58	-0.5627412	58	-0.5459912	58	-0.5159266	58	-0.483067	58	-0.4847808	58	-0.5063944
58.2	-0.5683814	58.2	-0.6423451	58.2	-0.5993936	58.2	-0.5816414	58.2	-0.6011453	58.2	-0.590119	58.2	-0.5652784	58.2	-0.5874907	58.2	-0.5502231	58.2	-0.5965252	58.2	-0.5540379	58.2	-0.5381764	58.2	-0.5128793	58.2	-0.4817513	58.2	-0.4808835	58.2	-0.503798
58.4	-0.5620934	58.4	-0.6328095	58.4	-0.591719	58.4	-0.5753024	58.4	-0.6005027	58.4	-0.5810007	58.4	-0.5702617	58.4	-0.5776681	58.4	-0.5415096	58.4	-0.5900989	58.4	-0.5503761	58.4	-0.5362219	58.4	-0.4997367	58.4	-0.4729229	58.4	-0.4697142	58.4	-0.4973697
58.6	-0.5550112	58.6	-0.6316289	58.6	-0.5855204	58.6	-0.5674515	58.6	-0.5927034	58.6	-0.5834277	58.6	-0.558228	58.6	-0.5733522	58.6	-0.53952	58.6	-0.5843493	58.6	-0.5417483	58.6	-0.5234	58.6	-0.4955771	58.6	-0.467276	58.6	-0.466599	58.6	-0.4901057
58.8	-0.552784	58.8	-0.6203112	58.8	-0.5796728	58.8	-0.5653583	58.8	-0.5938393	58.8	-0.5763168	58.8	-0.556079	58.8	-0.5667729	58.8	-0.5388934	58.8	-0.577519	58.8	-0.535781	58.8	-0.5199512	58.8	-0.4901129	58.8	-0.4645842	58.8	-0.4615389	58.8	-0.4896208
59	-0.5485491	59	-0.6189418	59	-0.5742632	59	-0.5565401	59	-0.5861099	59	-0.569306	59	-0.5477434	59	-0.5620395	59	-0.5301281	59	-0.5729761	59	-0.5316859	59	-0.5180936	59	-0.4878732	59	-0.4543303	59	-0.4561909	59	-0.4818496
59.2	-0.5423313	59.2	-0.6155792	59.2	-0.5730281	59.2	-0.5554125	59.2	-0.5708086	59.2	-0.5663279	59.2	-0.5433068	59.2	-0.5588936	59.2	-0.5209388	59.2	-0.5678158	59.2	-0.5292541	59.2	-0.5072522	59.2	-0.4853382	59.2	-0.4500373	59.2	-0.4501956	59.2	-0.4776784
59.4	-0.5402846	59.4	-0.6131875	59.4	-0.5670077	59.4	-0.5489293	59.4	-0.5801021	59.4	-0.5593013	59.4	-0.5392171	59.4	-0.553265	59.4	-0.5209198	59.4	-0.5590089	59.4	-0.524857	59.4	-0.5046502	59.4	-0.4795629	59.4	-0.449863	59.4	-0.4445816	59.4	-0.4708863
59.6	-0.5310273	59.6	-0.605178	59.6	-0.5648209	59.6	-0.5453591	59.6	-0.5674174	59.6	-0.5541763	59.6	-0.5380329	59.6	-0.5484265	59.6	-0.5131459	59.6	-0.5576023	59.6	-0.5202938	59.6	-0.5033733	59.6	-0.4718947	59.6	-0.4447535	59.6	-0.4430174	59.6	-0.4701733
59.8	-0.5310578	59.8	-0.6043813	59.8	-0.557416	59.8	-0.539625	59.8	-0.568914	59.8	-0.5524376	59.8	-0.5338171	59.8	-0.5472521	59.8	-0.5089147	59.8	-0.5536487	59.8	-0.5149795	59.8	-0.5003446	59.8	-0.4743915	59.8	-0.440291	59.8	-0.4441021	59.8	-0.4677639
60	-0.4882596	60	-0.5482357	60	-0.5058441	60	-0.4879434	60	-0.5118206	60	-0.5015305	60	-0.4792475	60	-0.4947895	60	-0.4760179	60	-0.5142005	60	-0.4836381	60	-0.4623341	60	-0.4362361	60	-0.4103459	60	-0.4023668	60	-0.4261173
60.2	-0.4799541	60.2	-0.5381986	60.2	-0.5032044	60.2	-0.4834284	60.2	-0.506704	60.2	-0.4924365	60.2	-0.4743081	60.2	-0.4920409	60.2	-0.4748172	60.2	-0.5185227	60.2	-0.4820027	60.2	-0.4664897	60.2	-0.4329995	60.2	-0.4082179	60.2	-0.3972708	60.2	-0.4292405
60.4	-0.4741969	60.4	-0.541296	60.4	-0.4993529	60.4	-0.483976	60.4	-0.5093406	60.4	-0.4927453	60.4	-0.4618012	60.4	-0.4896296	60.4	-0.471639	60.4	-0.5139655	60.4	-0.4764326	60.4	-0.4636815	60.4	-0.4335016	60.4	-0.4022261	60.4	-0.3965977	60.4	-0.428955
60.6	-0.4736895	60.6	-0.5356325	60.6	-0.4951829	60.6	-0.4793265	60.6	-0.5034345	60.6	-0.4907897	60.6	-0.4670844	60.6	-0.4861195	60.6	-0.4639674	60.6	-0.5131573	60.6	-0.4727527	60.6	-0.4662814	60.6	-0.4291898	60.6	-0.4031513	60.6	-0.3965237	60.6	-0.4253447
60.8	-0.4703425	60.8	-0.5349314	60.8	-0.4916631	60.8	-0.4829504	60.8	-0.4959097	60.8	-0.4863105	60.8	-0.4642721	60.8	-0.4851074	60.8	-0.4667799	60.8	-0.5101693	60.8	-0.4736558	60.8	-0.4612393	60.8	-0.426396	60.8	-0.4001033	60.8	-0.3920547	60.8	-0.4217848
61	-0.467535	61	-0.5344803	61	-0.4904255	61	-0.4761274	61	-0.4928961	61	-0.4826386	61	-0.4595858	61	-0.4825113	61	-0.4651259	61	-0.5062702	61	-0.4695264	61	-0.4532113	61	-0.4278225	61	-0.3988187	61	-0.3928737	61	-0.4171369
61.2	-0.4622291	61.2	-0.5309012	61.2	-0.4875113	61.2	-0.4725322	61.2	-0.4928757	61.2	-0.4813843	61.2	-0.4579402	61.2	-0.4742159	61.2	-0.4634934	61.2	-0.5079036	61.2	-0.4674851	61.2	-0.4554451	61.2	-0.4224638	61.2	-0.3952679	61.2	-0.3913664	61.2	-0.4158769
61.4	-0.4564967	61.4	-0.5340909	61.4	-0.4825719	61.4	-0.4661954	61.4	-0.4902774	61.4	-0.4800144	61.4	-0.4565286	61.4	-0.4734752	61.4	-0.463116	61.4	-0.5044067	61.4	-0.4632792	61.4	-0.4602342	61.4	-0.4201631	61.4	-0.3948682	61.4	-0.3870898	61.4	-0.4158773
61.6	-0.4562434	61.6	-0.5282738	61.6	-0.4828801	61.6	-0.4711212	61.6	-0.4839318	61.6	-0.4751325	61.6	-0.454823	61.6	-0.4732053	61.6	-0.4648249	61.6	-0.5013191	61.6	-0.4676039	61.6	-0.4491641	61.6	-0.4210189	61.6	-0.3949707	61.6	-0.3826912	61.6	-0.4130476
61.8	-0.4540015	61.8	-0.5224467	61.8	-0.4805634	61.8	-0.4685617	61.8	-0.4863937	61.8	-0.475712	61.8	-0.4476625	61.8	-0.469814	61.8	-0.4554473	61.8	-0.4967001	61.8	-0.4578789	61.8	-0.4452758	61.8	-0.4198639	61.8	-0.391141	61.8	-0.38477	61.8	-0.4087923
62	-0.4507781	62	-0.5208131	62	-0.4799934	62	-0.4615649	62	-0.4829136	62	-0.4741468	62	-0.4427575	62	-0.4712791	62	-0.4549335	62	-0.4962381	62	-0.4634654	62	-0.4454138	62	-0.4144042	62	-0.3868991	62	-0.3844691	62	-0.4093799
62.2	-0.4505919	62.2	-0.5174427	62.2	-0.4738488	62.2	-0.4606508	62.2	-0.4800258	62.2	-0.4697438	62.2	-0.4438874	62.2	-0.4682411	62.2	-0.4529701	62.2	-0.4965965	62.2	-0.4543808	62.2	-0.4425602	62.2	-0.4122352	62.2	-0.3863337	62.2	-0.3806342	62.2	-0.4018166
62.4	-0.4488182	62.4	-0.5180159	62.4	-0.4664874	62.4	-0.4540572	62.4	-0.4778112	62.4	-0.4645961	62.4	-0.4390666	62.4	-0.4622781	62.4	-0.4508415	62.4	-0.4941993	62.4	-0.4557414	62.4	-0.4454357	62.4	-0.4132918	62.4	-0.3862882	62.4	-0.378414	62.4	-0.4067375
62.6	-0.4411718	62.6	-0.5139644	62.6	-0.4745751	62.6	-0.4569717	62.6	-0.4791999	62.6	-0.4646472	62.6	-0.4404956	62.6	-0.4599002	62.6	-0.4520031	62.6	-0.4912416	62.6	-0.4525289	62.6	-0.4423651	62.6	-0.4066703	62.6	-0.3809529	62.6	-0.3718022	62.6	-0.4076122
62.8	-0.4443178	62.8	-0.5157452	62.8	-0.4707388	62.8	-0.455967	62.8	-0.4742115	62.8	-0.4632964	62.8	-0.439606	62.8	-0.4586148	62.8	-0.4466364	62.8	-0.4914244	62.8	-0.4510801	62.8	-0.4400365	62.8	-0.408912	62.8	-0.3800787	62.8	-0.3742024	62.8	-0.4049505
63	-0.4409643	63	-0.5090975	63	-0.4683691	63	-0.4575549	63	-0.4743787	63	-0.4617438	63	-0.4359055	63	-0.453016	63	-0.4474567	63	-0.4856658	63	-0.44849	63	-0.4373982	63	-0.4014476	63	-0.3803357	63	-0.3709743	63	-0.4010007
63.2	-0.4423895	63.2	-0.5057335	63.2	-0.461246	63.2	-0.4543592	63.2	-0.4741491	63.2	-0.4594558	63.2	-0.4340554	63.2	-0.4535168	63.2	-0.4459698	63.2	-0.4854901	63.2	-0.4477738	63.2	-0.4361812	63.2	-0.4063075	63.2	-0.3786751	63.2	-0.3683632	63.2	-0.4022175
63.4	-0.4427688	63.4	-0.5047334	63.4	-0.4631645	63.4	-0.4535316	63.4	-0.4712541	63.4	-0.4599154	63.4	-0.4278463	63.4	-0.4584996	63.4	-0.4421326	63.4	-0.4816891	63.4	-0.4467089	63.4	-0.4309017	63.4	-0.4036871	63.4	-0.3754449	63.4	-0.3680131	63.4	-0.4017174
63.6	-0.4383454	63.6	-0.5086662	63.6	-0.4601801	63.6	-0.4503693	63.6	-0.4644507	63.6	-0.4595418	63.6	-0.4275177	63.6	-0.451392	63.6	-0.4380203	63.6	-0.4851307	63.6	-0.449129	63.6	-0.4332508	63.6	-0.3992708	63.6	-0.3685199	63.6	-0.3661055	63.6	-0.3939537
63.8	-0.4367648	63.8	-0.5000244	63.8	-0.4585108	63.8	-0.44559	63.8	-0.4688806	63.8	-0.4565291	63.8	-0.4289972	63.8	-0.4517025	63.8	-0.4414154	63.8	-0.4767079	63.8	-0.4414263	63.8	-0.4298356	63.8	-0.394393	63.8	-0.3695242	63.8	-0.3655479	63.8	-0.3914701
64	-0.4282197	64	-0.5033503	64	-0.4554392	64	-0.4418576	64	-0.4637017	64	-0.4566897	64	-0.429023	64	-0.444457	64	-0.438287	64	-0.4783615	64	-0.4412326	64	-0.4261431	64	-0.3953177	64	-0.3687311	64	-0.3654025	64	-0.3912303
64.2	-0.4324881	64.2	-0.4991581	64.2	-0.454463	64.2	-0.4389022	64.2	-0.4588736	64.2	-0.4449227	64.2	-0.4221155	64.2	-0.4462839	64.2	-0.4343964	64.2	-0.4753608	64.2	-0.4389288	64.2	-0.4230545	64.2	-0.3992185	64.2	-0.3659005	64.2	-0.361127	64.2	-0.3843061
64.4	-0.4249207	64.4	-0.4987014	64.4	-0.4529741	64.4	-0.438268	64.4	-0.4605846	64.4	-0.4434652	64.4	-0.4210328	64.4	-0.4452029	64.4	-0.4353069	64.4	-0.4764654	64.4	-0.4373953	64.4	-0.4231657	64.4	-0.3965748	64.4	-0.3657991	64.4	-0.3559466	64.4	-0.3896062
64.6	-0.4248747	64.6	-0.4923241	64.6	-0.454632	64.6	-0.4404238	64.6	-0.4603938	64.6	-0.4463883	64.6	-0.4165933	64.6	-0.4460455	64.6	-0.4305961	64.6	-0.4723337	64.6	-0.4372135	64.6	-0.4234744	64.6	-0.3924968	64.6	-0.3660574	64.6	-0.3581314	64.6	-0.3909765
64.8	-0.4254074	64.8	-0.4912184	64.8	-0.4482417	64.8	-0.4393704	64.8	-0.4561891	64.8	-0.4455479	64.8	-0.4169124	64.8	-0.4385173	64.8	-0.4316532	64.8	-0.4722392	64.8	-0.4384166	64.8	-0.4160389	64.8	-0.3886741	64.8	-0.3642881	64.8	-0.3576438	64.8	-0.3853789
65	-0.4252885	65	-0.4906	65	-0.4496012	65	-0.4357871	65	-0.4560111	65	-0.438763	65	-0.4157773	65	-0.4453841	65	-0.427086	65	-0.4732454	65	-0.433237	65	-0.4244936	65	-0.3948722	65	-0.3634576	65	-0.3520664	65	-0.387589
65.2	-0.4218664	65.2	-0.4918497	65.2	-0.4434098	65.2	-0.4408603	65.2	-0.4573909	65.2	-0.4394391	65.2	-0.4147121	65.2	-0.4371468	65.2	-0.4328124	65.2	-0.4694268	65.2	-0.4327807	65.2	-0.42022	65.2	-0.3867683	65.2	-0.3577074	65.2	-0.352778	65.2	-0.3863502
65.4	-0.4176609	65.4	-0.4879199	65.4	-0.4439847	65.4	-0.4324137	65.4	-0.4502389	65.4	-0.4381588	65.4	-0.4127573	65.4	-0.4376956	65.4	-0.422787	65.4	-0.4662844	65.4	-0.4348341	65.4	-0.4209496	65.4	-0.3875291	65.4	-0.3569606	65.4	-0.3523522	65.4	-0.3864138
65.6	-0.4184033	65.6	-0.4864514	65.6	-0.4441885	65.6	-0.4279026	65.6	-0.4514509	65.6	-0.4358753	65.6	-0.4125401	65.6	-0.4356568	65.6	-0.424134	65.6	-0.4675314	65.6	-0.4291455	65.6	-0.4211114	65.6	-0.3869665	65.6	-0.3587301	65.6	-0.3450215	65.6	-0.3821951
65.8	-0.4080287	65.8	-0.4875859	65.8	-0.4404086	65.8	-0.4273157	65.8	-0.4474043	65.8	-0.433667	65.8	-0.4093007	65.8	-0.4369889	65.8	-0.4207538	65.8	-0.4672733	65.8	-0.4297406	65.8	-0.4125068	65.8	-0.3845036	65.8	-0.3516376	65.8	-0.3526505	65.8	-0.3814521
66	-0.4154202	66	-0.4844185	66	-0.4409873	66	-0.4253079	66	-0.4495916	66	-0.4356021	66	-0.4063737	66	-0.4317489	66	-0.4227374	66	-0.4604266	66	-0.429092	66	-0.4139751	66	-0.3828009	66	-0.3485795	66	-0.3474251	66	-0.3771137
66.21	-0.414754	66.21	-0.4799123	66.21	-0.4332619	66.21	-0.4273185	66.21	-0.4473875	66.21	-0.4260667	66.21	-0.403034	66.21	-0.4347955	66.2	-0.4226986	66.2	-0.4610267	66.2	-0.4237808	66.2	-0.415094	66.2	-0.3812031	66.2	-0.3545685	66.2	-0.3435943	66.2	-0.375549
66.4	-0.4072713	66.4	-0.4758327	66.4	-0.4356048	66.4	-0.4235012	66.4	-0.4460606	66.4	-0.4318805	66.4	-0.4063295	66.4	-0.4229278	66.4	-0.4174457	66.4	-0.4607087	66.4	-0.4265133	66.4	-0.4121204	66.4	-0.3803569	66.4	-0.3507776	66.4	-0.3485671	66.4	-0.374327
66.6	-0.410383	66.6	-0.4786984	66.6	-0.4395818	66.6	-0.4268817	66.6	-0.4444148	66.6	-0.4298824	66.6	-0.4036167	66.6	-0.4255789	66.6	-0.4162331	66.6	-0.457714	66.6	-0.4219667	66.6	-0.4103581	66.6	-0.3798876	66.6	-0.3516204	66.6	-0.3400024	66.6	-0.37558
66.8	-0.4054513	66.8	-0.4763622	66.8	-0.4310197	66.8	-0.4217734	66.8	-0.4390766	66.8	-0.4251029	66.8	-0.4019415	66.8	-0.4226104	66.8	-0.4127818	66.8	-0.4605424	66.8	-0.4187619	66.8	-0.4089356	66.8	-0.3785151	66.8	-0.3473681	66.8	-0.3445351	66.8	-0.3684042
67	-0.4053439	67	-0.4782934	67	-0.4300722	67	-0.419653	67	-0.4437441	67	-0.4251156	67	-0.3978288	67	-0.4229643	67	-0.4138454	67	-0.4565789	67	-0.4244874	67	-0.4039206	67	-0.3761017	67	-0.3446082	67	-0.3380419	67	-0.3719315
67.2	-0.4039612	67.2	-0.4731044	67.2	-0.432189	67.2	-0.4184248	67.2	-0.4356073	67.2	-0.4236031	67.2	-0.4034828	67.2	-0.4225405	67.2	-0.4140831	67.2	-0.4531009	67.2	-0.4203136	67.2	-0.4068474	67.2	-0.3742698	67.2	-0.3454349	67.2	-0.3389017	67.2	-0.3684242
67.4	-0.4034962	67.4	-0.4740467	67.4	-0.4254717	67.4	-0.4174646	67.4	-0.4366789	67.4	-0.4239899	67.4	-0.400504	67.4	-0.4202652	67.4	-0.4116742	67.4	-0.451317	67.4	-0.4182116	67.4	-0.4059263	67.4	-0.3740848	67.4	-0.3442749	67.4	-0.3382875	67.4	-0.3674361
67.6	-0.3995816	67.6	-0.4729787	67.6	-0.4251263	67.6	-0.4138869	67.6	-0.4355082	67.6	-0.4221588	67.6	-0.3956727	67.6	-0.4249649	67.6	-0.4123138	67.6	-0.4513251	67.6	-0.4106052	67.6	-0.4020227	67.6	-0.3719635	67.6	-0.3426498	67.6	-0.3368004	67.6	-0.3621672
67.8	-0.4013812	67.8	-0.4716607	67.8	-0.4260596	67.8	-0.4095894	67.8	-0.4351375	67.8	-0.4209629	67.8	-0.3938714	67.8	-0.421501	67.8	-0.4147398	67.8	-0.450596	67.8	-0.4154119	67.8	-0.4002271	67.8	-0.3693302	67.8	-0.3398466	67.8	-0.3364905	67.8	-0.3646685
68	-0.3984888	68	-0.4634188	68	-0.4308768	68	-0.4160191	68	-0.4321611	68	-0.4191069	68	-0.3960981	68	-0.4151802	68	-0.4088459	68	-0.4446932	68	-0.4114027	68	-0.4033313	68	-0.3731897	68	-0.337799	68	-0.3338941	68	-0.3695576
68.2	-0.4007421	68.2	-0.4660235	68.2	-0.4276243	68.2	-0.4122143	68.2	-0.4310549	68.2	-0.4165139	68.2	-0.3943987	68.2	-0.4193171	68.2	-0.4039598	68.2	-0.4478965	68.2	-0.411131	68.2	-0.3966086	68.2	-0.3663032	68.2	-0.3403036	68.2	-0.3313292	68.2	-0.3617609
68.4	-0.3945263	68.4	-0.4670919	68.4	-0.4268508	68.4	-0.4140002	68.4	-0.4290415	68.4	-0.4150545	68.4	-0.392198	68.4	-0.415918	68.4	-0.4049707	68.4	-0.4439909	68.4	-0.4131669	68.4	-0.3999811	68.4	-0.3675414	68.4	-0.3370925	68.4	-0.3312319	68.4	-0.3573769
68.61	-0.3976976	68.61	-0.4668946	68.61	-0.4231466	68.61	-0.4100128	68.61	-0.4266942	68.61	-0.4100624	68.61	-0.3938394	68.61	-0.4151622	68.6	-0.4083366	68.6	-0.4520496	68.6	-0.4081814	68.6	-0.3953515	68.6	-0.3650932	68.6	-0.3364553	68.6	-0.3313718	68.6	-0.3648718
68.8	-0.3935326	68.8	-0.4607239	68.8	-0.4203955	68.8	-0.4075753	68.8	-0.4282886	68.8	-0.4109618	68.8	-0.3920838	68.8	-0.4165381	68.8	-0.4028208	68.8	-0.4449877	68.8	-0.4113856	68.8	-0.3982455	68.8	-0.3677651	68.8	-0.3340382	68.8	-0.3263563	68.8	-0.3591575
69	-0.3910704	69	-0.4600988	69	-0.4163152	69	-0.4102215	69	-0.4253781	69	-0.4139572	69	-0.3907381	69	-0.4083714	69	-0.4010068	69	-0.4457883	69	-0.4090957	69	-0.3939474	69	-0.3635007	69	-0.3321304	69	-0.3309182	69	-0.3619365
69.2	-0.3906562	69.2	-0.4603317	69.2	-0.416875	69.2	-0.4063723	69.2	-0.4267573	69.2	-0.4088054	69.2	-0.3879498	69.2	-0.4072464	69.2	-0.4017047	69.2	-0.4424392	69.2	-0.4063879	69.2	-0.3944516	69.2	-0.3660076	69.2	-0.3286391	69.2	-0.3269773	69.2	-0.3571055
69.4	-0.3911608	69.4	-0.4608445	69.4	-0.4142171	69.4	-0.4057565	69.4	-0.4247387	69.4	-0.413635	69.4	-0.3862382	69.4	-0.4081679	69.4	-0.3998737	69.4	-0.4387251	69.4	-0.4002587	69.4	-0.3919456	69.4	-0.3578117	69.4	-0.3317393	69.4	-0.3281697	69.4	-0.3569862
69.6	-0.386107	69.6	-0.4628432	69.6	-0.4136226	69.6	-0.405187	69.6	-0.4246331	69.6	-0.4086963	69.6	-0.3833809	69.6	-0.4122845	69.6	-0.3982548	69.6	-0.4375054	69.6	-0.4081153	69.6	-0.3848487	69.6	-0.3635999	69.6	-0.3335827	69.6	-0.3243907	69.6	-0.3574107
69.8	-0.3834793	69.8	-0.4625763	69.8	-0.4120189	69.8	-0.4003903	69.8	-0.421385	69.8	-0.4045127	69.8	-0.3828788	69.8	-0.4100153	69.8	-0.3976626	69.8	-0.4418151	69.8	-0.4078695	69.8	-0.3855557	69.8	-0.3614854	69.8	-0.3300636	69.8	-0.3253566	69.8	-0.3492232
70	-0.3857964	70	-0.4577563	70	-0.4107138	70	-0.3993865	70	-0.4207668	70	-0.4075426	70	-0.3825732	70	-0.4064197	70	-0.3998635	70	-0.4388673	70	-0.4007629	70	-0.3890436	70	-0.3580744	70	-0.3262166	70	-0.3263319	70	-0.3519703
70.2	-0.3880168	70.2	-0.4554306	70.2	-0.4137385	70.2	-0.4028965	70.2	-0.4238079	70.2	-0.4067417	70.2	-0.3765348	70.2	-0.4038787	70.2	-0.3947835	70.2	-0.438356	70.2	-0.4021384	70.2	-0.3875556	70.2	-0.3516808	70.2	-0.3207748	70.2	-0.3229318	70.2	-0.3545894
70.4	-0.3832003	70.4	-0.4547568	70.4	-0.4095379	70.4	-0.3950641	70.4	-0.4153515	70.4	-0.4073402	70.4	-0.3800946	70.4	-0.4034719	70.4	-0.3948672	70.4	-0.4297992	70.4	-0.4049815	70.4	-0.3871827	70.4	-0.3517966	70.4	-0.3252957	70.4	-0.3177681	70.4	-0.3520749
70.6	-0.3850992	70.6	-0.4488643	70.6	-0.4128951	70.6	-0.4017753	70.6	-0.4171629	70.6	-0.4043104	70.6	-0.3771866	70.6	-0.39922	70.6	-0.395144	70.6	-0.4358101	70.6	-0.3940707	70.6	-0.3891629	70.6	-0.3541411	70.6	-0.3262092	70.6	-0.3231978	70.6	-0.3491073
70.8	-0.3833309	70.8	-0.4513226	70.8	-0.4082186	70.8	-0.39693	70.8	-0.4135235	70.8	-0.4007106	70.8	-0.37728	70.8	-0.4017366	70.8	-0.3918564	70.8	-0.4345053	70.8	-0.3936225	70.8	-0.3834581	70.8	-0.3529478	70.8	-0.3234297	70.8	-0.319006	70.8	-0.346894
71	-0.3845745	71	-0.4507978	71	-0.4061169	71	-0.3977791	71	-0.4100255	71	-0.3962583	71	-0.3761749	71	-0.3986084	71	-0.3922508	71	-0.4374236	71	-0.3936184	71	-0.3814626	71	-0.3553144	71	-0.3235416	71	-0.3150447	71	-0.3474295
71.2	-0.3820217	71.2	-0.4477123	71.2	-0.4046958	71.2	-0.3919471	71.2	-0.4103565	71.2	-0.3975914	71.2	-0.3703606	71.2	-0.4014235	71.2	-0.3845425	71.2	-0.4306353	71.2	-0.3972622	71.2	-0.378602	71.2	-0.3476337	71.2	-0.3208634	71.2	-0.3159301	71.2	-0.3484862
71.4	-0.3803177	71.4	-0.4495702	71.4	-0.4024106	71.4	-0.3926246	71.4	-0.4143117	71.4	-0.3974163	71.4	-0.3723406	71.4	-0.4002205	71.4	-0.3886713	71.4	-0.4267703	71.4	-0.3939165	71.4	-0.3810692	71.4	-0.3509742	71.4	-0.3213936	71.4	-0.3137224	71.4	-0.3510443
71.6	-0.37635	71.6	-0.4517055	71.6	-0.4014319	71.6	-0.3949283	71.6	-0.4092836	71.6	-0.4023132	71.6	-0.3743054	71.6	-0.3917066	71.6	-0.3897512	71.6	-0.4286583	71.6	-0.390375	71.6	-0.3813109	71.6	-0.3507059	71.6	-0.3194878	71.6	-0.3114046	71.6	-0.3431655
71.8	-0.3810315	71.8	-0.4478352	71.8	-0.4032088	71.8	-0.3890422	71.8	-0.4086924	71.8	-0.3918577	71.8	-0.365756	71.8	-0.3918764	71.8	-0.3902949	71.8	-0.4225802	71.8	-0.3904789	71.8	-0.380221	71.8	-0.3461318	71.8	-0.322734	71.8	-0.3142423	71.8	-0.3459798
72	-0.3740174	72	-0.4449692	72	-0.4052691	72	-0.3898977	72	-0.4106554	72	-0.3939909	72	-0.374624	72	-0.3965156	72	-0.3846744	72	-0.4303346	72	-0.3885141	72	-0.3757851	72	-0.349602	72	-0.3202839	72	-0.3134053	72	-0.3456399
72.2	-0.3716859	72.2	-0.4432519	72.2	-0.4032902	72.2	-0.3898685	72.2	-0.4095884	72.2	-0.3916383	72.2	-0.3693056	72.2	-0.3913732	72.2	-0.3850538	72.2	-0.4260254	72.2	-0.3899202	72.2	-0.3786944	72.2	-0.3464036	72.2	-0.3165604	72.2	-0.315709	72.2	-0.3439289
72.4	-0.3744824	72.4	-0.4434969	72.4	-0.4015253	72.4	-0.3871357	72.4	-0.4065925	72.4	-0.3909258	72.4	-0.3639262	72.4	-0.3951716	72.4	-0.385062	72.4	-0.4227116	72.4	-0.3858731	72.4	-0.3775037	72.4	-0.3482184	72.4	-0.316269	72.4	-0.313545	72.4	-0.3407019
72.6	-0.3710955	72.6	-0.4433357	72.6	-0.3981622	72.6	-0.3847699	72.6	-0.4083704	72.6	-0.3905141	72.6	-0.3670382	72.6	-0.3887967	72.6	-0.3863982	72.6	-0.42667	72.6	-0.3858905	72.6	-0.3748617	72.6	-0.3492787	72.6	-0.3173088	72.6	-0.3134529	72.6	-0.3420272
72.8	-0.3718807	72.8	-0.4475899	72.8	-0.3975476	72.8	-0.3857474	72.8	-0.4060285	72.8	-0.3856109	72.8	-0.3664232	72.8	-0.3915849	72.8	-0.3820137	72.8	-0.4227891	72.8	-0.3872597	72.8	-0.3691964	72.8	-0.342979	72.8	-0.3106809	72.8	-0.3091853	72.8	-0.3379829
73	-0.3719955	73	-0.4416515	73	-0.3938642	73	-0.3875439	73	-0.403748	73	-0.3892832	73	-0.3660642	73	-0.3915609	73	-0.3856821	73	-0.4225675	73	-0.3847171	73	-0.3708359	73	-0.3427077	73	-0.3137029	73	-0.3071458	73	-0.3397078
73.2	-0.3695896	73.2	-0.4378425	73.2	-0.397142	73.2	-0.3812862	73.2	-0.4093726	73.2	-0.3873846	73.2	-0.3653507	73.2	-0.3873069	73.2	-0.3827193	73.2	-0.4207954	73.2	-0.3827993	73.2	-0.3720756	73.2	-0.3401781	73.2	-0.3164208	73.2	-0.3053626	73.2	-0.3383501
73.4	-0.3680028	73.4	-0.4378029	73.4	-0.3972706	73.4	-0.3823131	73.4	-0.40333	73.4	-0.3884583	73.4	-0.3644673	73.4	-0.390261	73.4	-0.3789433	73.4	-0.4185052	73.4	-0.3855488	73.4	-0.3741783	73.4	-0.341695	73.4	-0.3064609	73.4	-0.3069239	73.4	-0.3424928
73.6	-0.3662268	73.6	-0.4368767	73.6	-0.3910039	73.6	-0.382438	73.6	-0.4014993	73.6	-0.3877808	73.6	-0.3587133	73.6	-0.3891908	73.6	-0.3797244	73.6	-0.4222177	73.6	-0.3830526	73.6	-0.3771971	73.6	-0.3421443	73.6	-0.3118148	73.6	-0.3031369	73.6	-0.3402129
73.8	-0.3659663	73.8	-0.4378357	73.8	-0.3931813	73.8	-0.3798639	73.8	-0.3980066	73.8	-0.38999	73.8	-0.3612508	73.8	-0.3861186	73.8	-0.3806743	73.8	-0.4189854	73.8	-0.3843708	73.8	-0.3707044	73.8	-0.3393992	73.8	-0.3092072	73.8	-0.3056811	73.8	-0.3325717
74	-0.3677984	74	-0.4348683	74	-0.3942575	74	-0.3780033	74	-0.4016592	74	-0.3875078	74	-0.3619492	74	-0.3837254	74	-0.3730708	74	-0.4173366	74	-0.3814717	74	-0.371164	74	-0.3406361	74	-0.304565	74	-0.3066009	74	-0.3331462
74.2	-0.3677982	74.2	-0.4326784	74.2	-0.3890119	74.2	-0.3812206	74.2	-0.3995503	74.2	-0.381421	74.2	-0.3619704	74.2	-0.3860065	74.2	-0.3775306	74.2	-0.4106683	74.2	-0.3805674	74.2	-0.3693122	74.2	-0.3360198	74.2	-0.30267	74.2	-0.3013058	74.2	-0.3360779
74.4	-0.3631493	74.4	-0.4346744	74.4	-0.3880729	74.4	-0.3784216	74.4	-0.3951765	74.4	-0.3833243	74.4	-0.3592346	74.4	-0.3828297	74.4	-0.3730048	74.4	-0.4175612	74.4	-0.379324	74.4	-0.3724182	74.4	-0.3367416	74.4	-0.3032313	74.4	-0.3040062	74.4	-0.3321224
74.6	-0.3682266	74.6	-0.4329468	74.6	-0.3897623	74.6	-0.3785648	74.6	-0.3972579	74.6	-0.3785271	74.6	-0.3570852	74.6	-0.3842246	74.6	-0.3740084	74.6	-0.4129334	74.6	-0.3799566	74.6	-0.3610419	74.6	-0.3363399	74.6	-0.3040322	74.6	-0.3012357	74.6	-0.3336278
74.8	-0.3691441	74.8	-0.4338458	74.8	-0.387299	74.8	-0.3742885	74.8	-0.3996833	74.8	-0.3792006	74.8	-0.358724	74.8	-0.3816756	74.8	-0.3720873	74.8	-0.4195163	74.8	-0.3714547	74.8	-0.3666949	74.8	-0.3348467	74.8	-0.2983507	74.8	-0.2975691	74.8	-0.3276859
75	-0.3653527	75	-0.4281402	75	-0.3851668	75	-0.376829	75	-0.3916913	75	-0.3757819	75	-0.3570092	75	-0.3823807	75	-0.373225	75	-0.4157432	75	-0.3772153	75	-0.3611782	75	-0.3329418	75	-0.3005772	75	-0.2950583	75	-0.3314519
75.2	-0.3540749	75.2	-0.4276173	75.2	-0.3832595	75.2	-0.3757367	75.2	-0.3917733	75.2	-0.3782235	75.2	-0.354374	75.2	-0.3807125	75.2	-0.3768789	75.2	-0.4140898	75.2	-0.3779189	75.2	-0.3634982	75.2	-0.3339474	75.2	-0.3019225	75.2	-0.294349	75.2	-0.3331789
75.4	-0.3593272	75.4	-0.4303826	75.4	-0.3877151	75.4	-0.3760609	75.4	-0.3906394	75.4	-0.3783674	75.4	-0.351863	75.4	-0.3757112	75.4	-0.3730527	75.4	-0.4139125	75.4	-0.3737819	75.4	-0.3670827	75.4	-0.3375008	75.4	-0.304032	75.4	-0.297121	75.4	-0.3323831
75.6	-0.3592732	75.6	-0.4294029	75.6	-0.3849543	75.6	-0.3770329	75.6	-0.3941704	75.6	-0.3731999	75.6	-0.3526237	75.6	-0.3711955	75.6	-0.3692225	75.6	-0.4068286	75.6	-0.3777439	75.6	-0.3627597	75.6	-0.3307543	75.6	-0.2973408	75.6	-0.2945643	75.6	-0.3246727
75.8	-0.3611292	75.8	-0.4256656	75.8	-0.3897792	75.8	-0.3706397	75.8	-0.392504	75.8	-0.3722371	75.8	-0.356006	75.8	-0.3769363	75.8	-0.3691652	75.8	-0.4071037	75.8	-0.3723229	75.8	-0.3597147	75.8	-0.3283203	75.8	-0.2998352	75.8	-0.300595	75.8	-0.3280347
76	-0.358745	76	-0.4244487	76	-0.3817518	76	-0.3751004	76	-0.3955224	76	-0.3731593	76	-0.3543961	76	-0.37589	76	-0.3686309	76	-0.406888	76	-0.3703534	76	-0.3578744	76	-0.3285132	76	-0.2993327	76	-0.2972094	76	-0.3279316
76.2	-0.3588398	76.2	-0.4240182	76.2	-0.3790585	76.2	-0.3675246	76.2	-0.386603	76.2	-0.3739982	76.2	-0.3527476	76.2	-0.3786884	76.2	-0.3661602	76.2	-0.4098748	76.2	-0.3682877	76.2	-0.3625432	76.2	-0.3273906	76.2	-0.298279	76.2	-0.2929997	76.2	-0.3242002
76.4	-0.3571537	76.4	-0.4204933	76.4	-0.3794769	76.4	-0.3673346	76.4	-0.3894959	76.4	-0.372821	76.4	-0.3535463	76.4	-0.3729053	76.4	-0.366052	76.4	-0.4053616	76.4	-0.3705631	76.4	-0.3580963	76.4	-0.3266101	76.4	-0.3013335	76.4	-0.2973783	76.4	-0.3179473
76.6	-0.3495607	76.6	-0.4228562	76.6	-0.3822641	76.6	-0.368551	76.6	-0.3846085	76.6	-0.3735366	76.6	-0.3499232	76.6	-0.3723591	76.6	-0.3652524	76.6	-0.4026944	76.6	-0.367177	76.6	-0.3560864	76.6	-0.3266453	76.6	-0.2953494	76.6	-0.2901434	76.6	-0.3258191
76.8	-0.3579477	76.8	-0.4216348	76.8	-0.3794324	76.8	-0.3678953	76.8	-0.3838097	76.8	-0.371227	76.8	-0.3475348	76.8	-0.3712936	76.8	-0.3636365	76.8	-0.402667	76.8	-0.3673844	76.8	-0.3549584	76.8	-0.3264906	76.8	-0.2947713	76.8	-0.291684	76.8	-0.3272035
77	-0.3493246	77	-0.4204488	77	-0.3779786	77	-0.3672138	77	-0.3834603	77	-0.3735608	77	-0.3451312	77	-0.3704399	77	-0.3596938	77	-0.4025016	77	-0.3668569	77	-0.3510168	77	-0.3242509	77	-0.2963481	77	-0.2923522	77	-0.3230542
77.2	-0.3513453	77.2	-0.4206597	77.2	-0.3784297	77.2	-0.3692836	77.2	-0.3852651	77.2	-0.3698479	77.2	-0.3466978	77.2	-0.3713736	77.2	-0.3629412	77.2	-0.4029167	77.2	-0.366657	77.2	-0.3496735	77.2	-0.3247726	77.2	-0.2940126	77.2	-0.2898307	77.2	-0.3227286
77.4	-0.3484975	77.4	-0.4192448	77.4	-0.3754075	77.4	-0.367348	77.4	-0.3867422	77.4	-0.3735402	77.4	-0.343846	77.4	-0.3699163	77.4	-0.3641874	77.4	-0.4008491	77.4	-0.3644286	77.4	-0.3554641	77.4	-0.3192113	77.4	-0.2912214	77.4	-0.2879438	77.4	-0.3196128
77.6	-0.3513337	77.6	-0.4191309	77.6	-0.3768028	77.6	-0.3632753	77.6	-0.3852563	77.6	-0.367432	77.6	-0.3405429	77.6	-0.3728618	77.6	-0.3607319	77.6	-0.4015355	77.6	-0.3685902	77.6	-0.3544028	77.6	-0.3257741	77.6	-0.2869228	77.6	-0.286815	77.6	-0.320581
77.8	-0.3498929	77.8	-0.4212105	77.8	-0.3709229	77.8	-0.3650424	77.8	-0.3849332	77.8	-0.367146	77.8	-0.3418922	77.8	-0.3665466	77.8	-0.3639644	77.8	-0.3977086	77.8	-0.359632	77.8	-0.3572077	77.8	-0.3255863	77.8	-0.2921477	77.8	-0.2866785	77.8	-0.3164123
78	-0.3480765	78	-0.412391	78	-0.3737266	78	-0.3578976	78	-0.3835379	78	-0.3681138	78	-0.3417488	78	-0.3661703	78	-0.3582609	78	-0.4002506	78	-0.3682136	78	-0.3528823	78	-0.3178141	78	-0.2861994	78	-0.2885786	78	-0.3186888
78.2	-0.349056	78.2	-0.4146685	78.2	-0.3699144	78.2	-0.3637487	78.2	-0.3789581	78.2	-0.3669159	78.2	-0.3497202	78.2	-0.3655728	78.2	-0.3524821	78.2	-0.3981788	78.2	-0.3644943	78.2	-0.3524024	78.2	-0.3214467	78.2	-0.2880838	78.2	-0.2840637	78.2	-0.3148401
78.4	-0.3482396	78.4	-0.4160512	78.4	-0.3745283	78.4	-0.3611524	78.4	-0.3822955	78.4	-0.3665075	78.4	-0.3397431	78.4	-0.3643619	78.4	-0.3554981	78.4	-0.3933251	78.4	-0.3604269	78.4	-0.3456271	78.4	-0.3181168	78.4	-0.2885624	78.4	-0.2822284	78.4	-0.3147731
78.6	-0.3428419	78.6	-0.4141771	78.6	-0.3725658	78.6	-0.3578384	78.6	-0.3774662	78.6	-0.3669456	78.6	-0.3398447	78.6	-0.3644983	78.6	-0.3557356	78.6	-0.3975825	78.6	-0.3592912	78.6	-0.3476061	78.6	-0.3152828	78.6	-0.2858654	78.6	-0.2851966	78.6	-0.3202285
78.8	-0.3452669	78.8	-0.4158927	78.8	-0.3676791	78.8	-0.3579801	78.8	-0.3749364	78.8	-0.364355	78.8	-0.3354823	78.8	-0.3664495	78.8	-0.3581436	78.8	-0.3942303	78.8	-0.3591321	78.8	-0.3430691	78.8	-0.3206859	78.8	-0.290869	78.8	-0.2798823	78.8	-0.3054626
79	-0.344009	79	-0.4156733	79	-0.3726433	79	-0.355261	79	-0.3784043	79	-0.3614706	79	-0.3362854	79	-0.3579189	79	-0.3580599	79	-0.3985469	79	-0.3565309	79	-0.3431598	79	-0.3177184	79	-0.2842089	79	-0.2835445	79	-0.3172559
79.2	-0.3450843	79.2	-0.4139197	79.2	-0.364217	79.2	-0.3568741	79.2	-0.3775524	79.2	-0.3641732	79.2	-0.3397054	79.2	-0.3646808	79.2	-0.3507872	79.2	-0.3984752	79.2	-0.3642871	79.2	-0.3434436	79.2	-0.320118	79.2	-0.2841621	79.2	-0.2784925	79.2	-0.3139169
79.4	-0.3410285	79.4	-0.4132251	79.4	-0.3688135	79.4	-0.3557505	79.4	-0.3759695	79.4	-0.3584571	79.4	-0.3364159	79.4	-0.3645044	79.4	-0.3542959	79.4	-0.395294	79.4	-0.3572882	79.4	-0.3463438	79.4	-0.3132702	79.4	-0.2812561	79.4	-0.2824045	79.4	-0.3087895
79.6	-0.347651	79.6	-0.4135287	79.6	-0.3672872	79.6	-0.3542003	79.6	-0.3734349	79.6	-0.3583418	79.6	-0.3371976	79.6	-0.3663537	79.6	-0.3550541	79.6	-0.3915846	79.6	-0.3550954	79.6	-0.3510907	79.6	-0.3150908	79.6	-0.282407	79.6	-0.2822595	79.6	-0.3065431
79.8	-0.3363192	79.8	-0.4075856	79.8	-0.3644791	79.8	-0.3537032	79.8	-0.374064	79.8	-0.3580195	79.8	-0.3335433	79.8	-0.3598987	79.8	-0.3487111	79.8	-0.3923193	79.8	-0.3554294	79.8	-0.3444735	79.8	-0.3137394	79.8	-0.2829682	79.8	-0.2800629	79.8	-0.3116137
80	-0.3432232	80	-0.4091052	80	-0.3688046	80	-0.3560525	80	-0.3764351	80	-0.360307	80	-0.3322642	80	-0.3587424	80	-0.3530161	80	-0.3907191	80	-0.3583054	80	-0.3445621	80	-0.3141929	80	-0.2803533	80	-0.2813826	80	-0.3136281
80.2	-0.339194	80.2	-0.4076382	80.2	-0.3665621	80.2	-0.35754	80.2	-0.3763827	80.2	-0.3583689	80.2	-0.3302322	80.2	-0.358488	80.2	-0.3470566	80.2	-0.393116	80.2	-0.3557789	80.2	-0.3388703	80.2	-0.3164925	80.2	-0.2791689	80.2	-0.2803202	80.2	-0.3131429
80.4	-0.3411246	80.4	-0.4103349	80.4	-0.3643421	80.4	-0.3544869	80.4	-0.3701039	80.4	-0.3560287	80.4	-0.3334541	80.4	-0.3549308	80.4	-0.351348	80.4	-0.3890055	80.4	-0.3522247	80.4	-0.3424794	80.4	-0.3124276	80.4	-0.2770361	80.4	-0.2765991	80.4	-0.3028931
80.6	-0.3370647	80.6	-0.4049284	80.6	-0.366192	80.6	-0.3513368	80.6	-0.3732016	80.6	-0.355876	80.6	-0.3313027	80.6	-0.3599628	80.6	-0.3528458	80.6	-0.3907893	80.6	-0.3536445	80.6	-0.3410697	80.6	-0.311125	80.6	-0.2815697	80.6	-0.2801358	80.6	-0.3103572
80.8	-0.3360907	80.8	-0.4099115	80.8	-0.364383	80.8	-0.3497681	80.8	-0.369501	80.8	-0.356745	80.8	-0.3284284	80.8	-0.3559447	80.8	-0.3481216	80.8	-0.3850443	80.8	-0.3554739	80.8	-0.3416021	80.8	-0.3119086	80.8	-0.2788703	80.8	-0.2772206	80.8	-0.3137529
81	-0.3417872	81	-0.4094922	81	-0.3621474	81	-0.3511441	81	-0.3707023	81	-0.3533363	81	-0.3311623	81	-0.3594061	81	-0.3508919	81	-0.3872915	81	-0.3537299	81	-0.339629	81	-0.3086227	81	-0.278047	81	-0.2825743	81	-0.3112391
81.2	-0.3396032	81.2	-0.4067028	81.2	-0.3592735	81.2	-0.3542393	81.2	-0.3696572	81.2	-0.3596171	81.2	-0.3317604	81.2	-0.3525246	81.2	-0.3498462	81.2	-0.3840249	81.2	-0.3445345	81.2	-0.3390692	81.2	-0.3070884	81.2	-0.2792495	81.2	-0.2766418	81.2	-0.3064184
81.4	-0.3372692	81.4	-0.4046347	81.4	-0.3595733	81.4	-0.3501804	81.4	-0.3660174	81.4	-0.3533944	81.4	-0.3328189	81.4	-0.3499182	81.4	-0.3473209	81.4	-0.3889413	81.4	-0.3538097	81.4	-0.3378473	81.4	-0.3075854	81.4	-0.2780033	81.4	-0.2734249	81.4	-0.3061929
81.6	-0.3353634	81.6	-0.3990484	81.6	-0.3592276	81.6	-0.3487345	81.6	-0.3685609	81.6	-0.3557439	81.6	-0.3263771	81.6	-0.3603351	81.6	-0.350095	81.6	-0.3816522	81.6	-0.351996	81.6	-0.340521	81.6	-0.3090498	81.6	-0.2775361	81.6	-0.2716877	81.6	-0.3008803
81.8	-0.3346237	81.8	-0.3988922	81.8	-0.3577989	81.8	-0.3471831	81.8	-0.365512	81.8	-0.3528992	81.8	-0.3301051	81.8	-0.3535548	81.8	-0.3462175	81.8	-0.3839324	81.8	-0.3522379	81.8	-0.3335338	81.8	-0.3073024	81.8	-0.2748628	81.8	-0.2752239	81.8	-0.3060676
82	-0.3296991	82	-0.3976961	82	-0.3626374	82	-0.3461746	82	-0.3736705	82	-0.3469966	82	-0.3237093	82	-0.3510008	82	-0.3428971	82	-0.3810031	82	-0.3501821	82	-0.3387603	82	-0.3081823	82	-0.2759964	82	-0.272249	82	-0.3024218
82.2	-0.3355493	82.2	-0.4007755	82.2	-0.3582526	82.2	-0.3455581	82.2	-0.3638938	82.2	-0.3523074	82.2	-0.3190066	82.2	-0.3512863	82.2	-0.3480613	82.2	-0.3802423	82.2	-0.3490342	82.2	-0.335705	82.2	-0.3056605	82.2	-0.2721987	82.2	-0.271433	82.2	-0.3041627
82.4	-0.3330326	82.4	-0.3986242	82.4	-0.3613406	82.4	-0.3455094	82.4	-0.3682364	82.4	-0.3469499	82.4	-0.3291004	82.4	-0.3550822	82.4	-0.3457178	82.4	-0.3812979	82.4	-0.3450171	82.4	-0.3294454	82.4	-0.3048086	82.4	-0.2739827	82.4	-0.2715852	82.4	-0.3026405
82.6	-0.3300804	82.6	-0.4007415	82.6	-0.3555251	82.6	-0.345072	82.6	-0.3607029	82.6	-0.3484441	82.6	-0.3278957	82.6	-0.3498061	82.6	-0.3411878	82.6	-0.3825037	82.6	-0.3491288	82.6	-0.3304447	82.6	-0.3053572	82.6	-0.2709363	82.6	-0.2730885	82.6	-0.3022304
82.8	-0.3311999	82.8	-0.3999484	82.8	-0.35676	82.8	-0.3434612	82.8	-0.3663153	82.8	-0.345902	82.8	-0.3234996	82.8	-0.348995	82.8	-0.3418928	82.8	-0.382502	82.8	-0.345943	82.8	-0.3310245	82.8	-0.3056008	82.8	-0.2660526	82.8	-0.2684788	82.8	-0.3010126
83	-0.3321713	83	-0.3975181	83	-0.3516494	83	-0.3444968	83	-0.3687192	83	-0.3495671	83	-0.3244766	83	-0.3473743	83	-0.3406455	83	-0.3811781	83	-0.345286	83	-0.3298632	83	-0.3008903	83	-0.2694778	83	-0.2678569	83	-0.2972903
83.2	-0.3320914	83.2	-0.3956727	83.2	-0.3543901	83.2	-0.3456137	83.2	-0.359266	83.2	-0.345955	83.2	-0.3253222	83.2	-0.351144	83.2	-0.3413468	83.2	-0.3813741	83.2	-0.3471445	83.2	-0.3318228	83.2	-0.3022912	83.2	-0.2663871	83.2	-0.270808	83.2	-0.3018877
83.4	-0.3311514	83.4	-0.3964548	83.4	-0.3572257	83.4	-0.3427272	83.4	-0.3636023	83.4	-0.3434982	83.4	-0.3243633	83.4	-0.3510876	83.4	-0.3365129	83.4	-0.3748785	83.4	-0.3417781	83.4	-0.3344591	83.4	-0.3021995	83.4	-0.2679445	83.4	-0.2709656	83.4	-0.3019816
83.6	-0.3282628	83.6	-0.3976801	83.6	-0.3530526	83.6	-0.3421066	83.6	-0.3621099	83.6	-0.3475226	83.6	-0.3247634	83.6	-0.3481528	83.6	-0.3374672	83.6	-0.3792866	83.6	-0.3439916	83.6	-0.3312959	83.6	-0.3043343	83.6	-0.2692097	83.6	-0.2671803	83.6	-0.2979653
83.8	-0.3313639	83.8	-0.39542	83.8	-0.3505823	83.8	-0.3389293	83.8	-0.358184	83.8	-0.3454496	83.8	-0.3194461	83.8	-0.3466769	83.8	-0.3367758	83.8	-0.3763636	83.8	-0.3454752	83.8	-0.3314326	83.8	-0.3016935	83.8	-0.2694978	83.8	-0.2648402	83.8	-0.2989057
84	-0.3263822	84	-0.3948216	84	-0.3487788	84	-0.3405357	84	-0.3559028	84	-0.3418933	84	-0.3165773	84	-0.3421935	84	-0.3369414	84	-0.3769692	84	-0.3394095	84	-0.3293596	84	-0.3003699	84	-0.2690319	84	-0.2671412	84	-0.2970729
84.2	-0.3230989	84.2	-0.3904801	84.2	-0.353181	84.2	-0.343489	84.2	-0.3618636	84.2	-0.3440557	84.2	-0.3197736	84.2	-0.348347	84.2	-0.3355016	84.2	-0.376174	84.2	-0.3432118	84.2	-0.3288887	84.2	-0.3024465	84.2	-0.2718742	84.2	-0.2608903	84.2	-0.3002085
84.4	-0.3262842	84.4	-0.3929248	84.4	-0.3537125	84.4	-0.3376857	84.4	-0.3590246	84.4	-0.3490348	84.4	-0.3180055	84.4	-0.3410522	84.4	-0.3369386	84.4	-0.3748524	84.4	-0.3443058	84.4	-0.3262551	84.4	-0.3003898	84.4	-0.2620409	84.4	-0.2660079	84.4	-0.2909059
84.6	-0.3259723	84.6	-0.3938196	84.6	-0.3509058	84.6	-0.3357024	84.6	-0.3589666	84.6	-0.3397212	84.6	-0.3190343	84.6	-0.3445504	84.6	-0.3360166	84.6	-0.3762779	84.6	-0.3397541	84.6	-0.3291751	84.6	-0.3001755	84.6	-0.2680042	84.6	-0.2645975	84.6	-0.301981
84.8	-0.3255332	84.8	-0.3934098	84.8	-0.3489615	84.8	-0.3370069	84.8	-0.3595926	84.8	-0.3392584	84.8	-0.318947	84.8	-0.3444885	84.8	-0.3342053	84.8	-0.3692893	84.8	-0.338078	84.8	-0.3282755	84.8	-0.2981164	84.8	-0.2659692	84.8	-0.2638628	84.8	-0.2945533
85	-0.3251109	85	-0.390484	85	-0.3493195	85	-0.3356122	85	-0.3574353	85	-0.3401469	85	-0.3187206	85	-0.3473243	85	-0.3352161	85	-0.3726316	85	-0.3388437	85	-0.3244515	85	-0.3017316	85	-0.2654283	85	-0.2625593	85	-0.2917221
85.2	-0.3202486	85.2	-0.3879053	85.2	-0.3490287	85.2	-0.3365816	85.2	-0.3592702	85.2	-0.3371028	85.2	-0.3153837	85.2	-0.3414323	85.2	-0.3306946	85.2	-0.3760188	85.2	-0.3347457	85.2	-0.3299342	85.2	-0.2985162	85.2	-0.2602548	85.2	-0.2641273	85.2	-0.2951732
85.4	-0.3266737	85.4	-0.3902469	85.4	-0.3468544	85.4	-0.3375082	85.4	-0.3525595	85.4	-0.3397065	85.4	-0.3182598	85.4	-0.3449339	85.4	-0.3402822	85.4	-0.3718328	85.4	-0.3400279	85.4	-0.3307174	85.4	-0.2961535	85.4	-0.2636978	85.4	-0.2613607	85.4	-0.2927818
85.6	-0.3246999	85.6	-0.3866804	85.6	-0.3507319	85.6	-0.3364102	85.6	-0.3520981	85.6	-0.3398371	85.6	-0.320847	85.6	-0.340013	85.6	-0.3316316	85.6	-0.3706097	85.6	-0.3355528	85.6	-0.3274918	85.6	-0.2977673	85.6	-0.2621863	85.6	-0.2610934	85.6	-0.2953218
85.8	-0.320606	85.8	-0.384575	85.8	-0.3467556	85.8	-0.3356104	85.8	-0.3559488	85.8	-0.3427174	85.8	-0.3144601	85.8	-0.3395774	85.8	-0.3310287	85.8	-0.3709278	85.8	-0.3362573	85.8	-0.3259526	85.8	-0.2936891	85.8	-0.2654817	85.8	-0.257926	85.8	-0.294196
86	-0.3214617	86	-0.389787	86	-0.3460045	86	-0.3336924	86	-0.3495219	86	-0.3397245	86	-0.3120355	86	-0.3432001	86	-0.335983	86	-0.3699686	86	-0.3339709	86	-0.3238079	86	-0.2905299	86	-0.2595576	86	-0.2606224	86	-0.2927552
86.2	-0.3210922	86.2	-0.3860164	86.2	-0.3465497	86.2	-0.3367949	86.2	-0.3575803	86.2	-0.3377758	86.2	-0.3115272	86.2	-0.3414702	86.2	-0.329285	86.2	-0.3739572	86.2	-0.3354598	86.2	-0.322582	86.2	-0.2940587	86.2	-0.2582031	86.2	-0.2599896	86.2	-0.2903133
86.4	-0.3173594	86.4	-0.3845415	86.4	-0.3510096	86.4	-0.3332072	86.4	-0.3497289	86.4	-0.3381119	86.4	-0.3124299	86.4	-0.3417204	86.4	-0.3314292	86.4	-0.3710829	86.4	-0.3324794	86.4	-0.3233379	86.4	-0.2907989	86.4	-0.2601067	86.4	-0.2564394	86.4	-0.2976373
86.6	-0.320543	86.6	-0.3850507	86.6	-0.3442143	86.6	-0.3276019	86.6	-0.3524323	86.6	-0.3379085	86.6	-0.3170864	86.6	-0.3358358	86.6	-0.3311541	86.6	-0.3689816	86.6	-0.3387319	86.6	-0.3160405	86.6	-0.2944928	86.6	-0.2591892	86.6	-0.2582109	86.6	-0.2932024
86.8	-0.3215617	86.8	-0.3854465	86.8	-0.3414796	86.8	-0.3359339	86.8	-0.3496794	86.8	-0.3350497	86.8	-0.3116414	86.8	-0.338956	86.8	-0.3280126	86.8	-0.3640454	86.8	-0.3320507	86.8	-0.3204189	86.8	-0.2921289	86.8	-0.2581806	86.8	-0.2583886	86.8	-0.288911
87	-0.3204994	87	-0.3844556	87	-0.3410746	87	-0.3306969	87	-0.3476088	87	-0.3330812	87	-0.3103145	87	-0.3357109	87	-0.3255264	87	-0.3652083	87	-0.335135	87	-0.3234295	87	-0.2953834	87	-0.2555069	87	-0.2552665	87	-0.2894794
87.2	-0.3128099	87.2	-0.3858077	87.2	-0.3407093	87.2	-0.3312218	87.2	-0.3515902	87.2	-0.3317536	87.2	-0.3083203	87.2	-0.3392153	87.2	-0.3288934	87.2	-0.3660948	87.2	-0.3254621	87.2	-0.3192441	87.2	-0.2881821	87.2	-0.25736	87.2	-0.2582771	87.2	-0.2874159
87.4	-0.3162026	87.4	-0.3877977	87.4	-0.3452494	87.4	-0.3336723	87.4	-0.35195	87.4	-0.3321867	87.4	-0.3049614	87.4	-0.3351066	87.4	-0.3268538	87.4	-0.3641082	87.4	-0.3308106	87.4	-0.317445	87.4	-0.2874786	87.4	-0.2532842	87.4	-0.251974	87.4	-0.2845998
87.6	-0.3147526	87.6	-0.3816423	87.6	-0.3428896	87.6	-0.3290587	87.6	-0.3468443	87.6	-0.3326845	87.6	-0.3091674	87.6	-0.3386465	87.6	-0.325774	87.6	-0.364127	87.6	-0.3339061	87.6	-0.3225722	87.6	-0.2893117	87.6	-0.2552437	87.6	-0.2543875	87.6	-0.2898147
87.8	-0.3143479	87.8	-0.3810941	87.8	-0.3414018	87.8	-0.3312089	87.8	-0.3450519	87.8	-0.330398	87.8	-0.3072006	87.8	-0.3360097	87.8	-0.3244712	87.8	-0.3676289	87.8	-0.3330638	87.8	-0.3149245	87.8	-0.2876584	87.8	-0.2526667	87.8	-0.2533573	87.8	-0.2905854
88	-0.3148989	88	-0.3822252	88	-0.3395928	88	-0.3313313	88	-0.3464529	88	-0.3386507	88	-0.3068974	88	-0.3337377	88	-0.3253728	88	-0.3629339	88	-0.3312076	88	-0.3150995	88	-0.2850905	88	-0.2543675	88	-0.2567515	88	-0.2875043
88.2	-0.3140386	88.2	-0.3842094	88.2	-0.3386968	88.2	-0.3291012	88.2	-0.3506921	88.2	-0.3277417	88.2	-0.3098715	88.2	-0.3344686	88.2	-0.324348	88.2	-0.3622073	88.2	-0.3278723	88.2	-0.3180392	88.2	-0.2862472	88.2	-0.2518038	88.2	-0.2500888	88.2	-0.2856345
88.4	-0.3178969	88.4	-0.3818882	88.4	-0.3388501	88.4	-0.3292212	88.4	-0.3455823	88.4	-0.3311573	88.4	-0.3064195	88.4	-0.3354079	88.4	-0.3268824	88.4	-0.3622789	88.4	-0.3243715	88.4	-0.3197944	88.4	-0.287034	88.4	-0.2543011	88.4	-0.2491357	88.4	-0.2837809
88.6	-0.3135072	88.6	-0.3797508	88.6	-0.340285	88.6	-0.3312002	88.6	-0.3467636	88.6	-0.328814	88.6	-0.3066355	88.6	-0.3325619	88.6	-0.3267884	88.6	-0.3612797	88.6	-0.3244262	88.6	-0.3144913	88.6	-0.2866016	88.6	-0.253845	88.6	-0.2527026	88.6	-0.2837679
88.8	-0.3161798	88.8	-0.3794555	88.8	-0.3415828	88.8	-0.3255239	88.8	-0.3436354	88.8	-0.3295788	88.8	-0.3054627	88.8	-0.333121	88.8	-0.3224232	88.8	-0.3636581	88.8	-0.3261926	88.8	-0.3115249	88.8	-0.2865942	88.8	-0.2499514	88.8	-0.2463778	88.8	-0.2864975
89	-0.3151765	89	-0.3810079	89	-0.3389913	89	-0.3212503	89	-0.3390685	89	-0.3297135	89	-0.3008139	89	-0.3283018	89	-0.3225978	89	-0.3617212	89	-0.3355257	89	-0.3122775	89	-0.2877773	89	-0.2523014	89	-0.2517169	89	-0.2836703
89.2	-0.3136151	89.2	-0.3804128	89.2	-0.3375706	89.2	-0.3269531	89.2	-0.3435994	89.2	-0.3236956	89.2	-0.3019333	89.2	-0.3319745	89.2	-0.3238674	89.2	-0.3624026	89.2	-0.3251738	89.2	-0.3147931	89.2	-0.2862639	89.2	-0.2540135	89.2	-0.2560758	89.2	-0.2843981
89.4	-0.3117165	89.4	-0.3767622	89.4	-0.3347231	89.4	-0.3276458	89.4	-0.3397511	89.4	-0.3298166	89.4	-0.301666	89.4	-0.3260747	89.4	-0.3245316	89.4	-0.3617773	89.4	-0.3264942	89.4	-0.3151852	89.4	-0.2833515	89.4	-0.2496186	89.4	-0.248169	89.4	-0.2829645
89.6	-0.3164874	89.6	-0.3798369	89.6	-0.3380005	89.6	-0.3242592	89.6	-0.3432742	89.6	-0.3291747	89.6	-0.2987553	89.6	-0.329418	89.6	-0.3198981	89.6	-0.3607683	89.6	-0.3244335	89.6	-0.3154859	89.6	-0.2802485	89.6	-0.2459396	89.6	-0.2505585	89.6	-0.2865134
89.8	-0.3091637	89.8	-0.3770265	89.8	-0.3362057	89.8	-0.3257414	89.8	-0.3417914	89.8	-0.3274019	89.8	-0.3046903	89.8	-0.3294616	89.8	-0.3191045	89.8	-0.3595919	89.8	-0.322464	89.8	-0.3137639	89.8	-0.2846162	89.8	-0.2497813	89.8	-0.2468137	89.8	-0.2826464
90	-0.3294706	90	-0.3970303	90	-0.3514217	90	-0.340577	90	-0.3639302	90	-0.3457167	90	-0.3232139	90	-0.3217157	90	-0.3153044	90	-0.3577266	90	-0.3192366	90	-0.309692	90	-0.2772411	90	-0.2496161	90	-0.2509983	90	-0.2825174
90.2	-0.3212649	90.2	-0.3920967	90.2	-0.3432309	90.2	-0.3372272	90.2	-0.3554665	90.2	-0.3385059	90.2	-0.3176577	90.2	-0.3166574	90.2	-0.3168581	90.2	-0.3585168	90.2	-0.321195	90.2	-0.3057495	90.2	-0.2799616	90.2	-0.2477937	90.2	-0.2444588	90.2	-0.2849727
90.4	-0.3073597	90.4	-0.3767511	90.4	-0.3378645	90.4	-0.3251618	90.4	-0.3490071	90.4	-0.3311855	90.4	-0.3083216	90.4	-0.3216538	90.4	-0.315359	90.4	-0.3552633	90.4	-0.3204972	90.4	-0.3071115	90.4	-0.2815215	90.4	-0.2443469	90.4	-0.248359	90.4	-0.2834094
90.6	-0.2997297	90.6	-0.3718486	90.6	-0.3283594	90.6	-0.3134413	90.6	-0.3415353	90.6	-0.3224062	90.6	-0.301973	90.6	-0.3186691	90.6	-0.3168506	90.6	-0.3520262	90.6	-0.3249235	90.6	-0.3114804	90.6	-0.2777824	90.6	-0.2479717	90.6	-0.2455803	90.6	-0.2763056
90.8	-0.2912918	90.8	-0.3668272	90.8	-0.3178244	90.8	-0.3045547	90.8	-0.3271608	90.8	-0.3056042	90.8	-0.2917025	90.8	-0.3161691	90.8	-0.3147012	90.8	-0.3511564	90.8	-0.3176919	90.8	-0.3060016	90.8	-0.2740233	90.8	-0.2462727	90.8	-0.2456326	90.8	-0.2791548
91	-0.2805611	91	-0.3501755	91	-0.3106918	91	-0.2986726	91	-0.3182775	91	-0.2999295	91	-0.2813495	91	-0.3152997	91	-0.3151437	91	-0.3495547	91	-0.3187139	91	-0.3077329	91	-0.2739676	91	-0.2417582	91	-0.2448891	91	-0.2700863
91.2	-0.2709909	91.2	-0.3429994	91.2	-0.2994879	91.2	-0.2844751	91.2	-0.3090218	91.2	-0.2947381	91.2	-0.2722631	91.2	-0.3157826	91.2	-0.3148994	91.2	-0.3532215	91.2	-0.3218803	91.2	-0.3052172	91.2	-0.2734003	91.2	-0.241344	91.2	-0.2425628	91.2	-0.2764224
91.4	-0.2592122	91.4	-0.332981	91.4	-0.288242	91.4	-0.2764547	91.4	-0.2987118	91.4	-0.280029	91.4	-0.2624081	91.4	-0.3149925	91.4	-0.3101415	91.4	-0.3499539	91.4	-0.3173922	91.4	-0.3052897	91.4	-0.2754891	91.4	-0.243251	91.4	-0.2421387	91.4	-0.2776453
91.6	-0.2474863	91.6	-0.3207534	91.6	-0.2748732	91.6	-0.2669707	91.6	-0.2843443	91.6	-0.2683915	91.6	-0.2477268	91.6	-0.3104743	91.6	-0.3121663	91.6	-0.3517057	91.6	-0.3127024	91.6	-0.3065992	91.6	-0.2771042	91.6	-0.240133	91.6	-0.2420879	91.6	-0.2760574
91.8	-0.2419999	91.8	-0.3102809	91.8	-0.2652509	91.8	-0.2578476	91.8	-0.2772675	91.8	-0.2575309	91.8	-0.2384225	91.8	-0.3168146	91.8	-0.3142345	91.8	-0.3476017	91.8	-0.3179354	91.8	-0.3086935	91.8	-0.2752202	91.8	-0.2414514	91.8	-0.2449521	91.8	-0.273486
92	-0.2342765	92	-0.3071	92	-0.2556087	92	-0.2463577	92	-0.2699238	92	-0.2482613	92	-0.2335177	92	-0.3146047	92	-0.3057069	92	-0.3509052	92	-0.3160983	92	-0.3061794	92	-0.2784893	92	-0.2423875	92	-0.2396417	92	-0.2796504
92.2	-0.2195695	92.2	-0.297031	92.2	-0.2505766	92.2	-0.2352027	92.2	-0.2633534	92.2	-0.2432709	92.2	-0.2245629	92.2	-0.3144231	92.2	-0.3106509	92.2	-0.3518183	92.2	-0.3168835	92.2	-0.2982897	92.2	-0.2772293	92.2	-0.2379183	92.2	-0.2386998	92.2	-0.2719738
92.4	-0.2144649	92.4	-0.2828164	92.4	-0.2405301	92.4	-0.2290187	92.4	-0.2551218	92.4	-0.2316207	92.4	-0.2114795	92.4	-0.311362	92.4	-0.3130606	92.4	-0.3499368	92.4	-0.3149501	92.4	-0.2996881	92.4	-0.2749988	92.4	-0.239192	92.4	-0.2397752	92.4	-0.2752331
92.6	-0.2004937	92.6	-0.2715698	92.6	-0.2264339	92.6	-0.2177971	92.6	-0.2369912	92.6	-0.2172183	92.6	-0.1970537	92.6	-0.3130323	92.6	-0.3103076	92.6	-0.3458613	92.6	-0.3184178	92.6	-0.3032832	92.6	-0.2746111	92.6	-0.2395581	92.6	-0.2372129	92.6	-0.2738265
92.8	-0.189116	92.8	-0.2677008	92.8	-0.2194599	92.8	-0.2055891	92.8	-0.2297914	92.8	-0.2132694	92.8	-0.1904567	92.8	-0.3107069	92.8	-0.3112061	92.8	-0.3462874	92.8	-0.3156318	92.8	-0.307477	92.8	-0.2705724	92.8	-0.2350888	92.8	-0.2421838	92.8	-0.2707783
93	-0.181788	93	-0.2521212	93	-0.2056868	93	-0.1976941	93	-0.2224061	93	-0.204847	93	-0.1832713	93	-0.3075942	93	-0.3125092	93	-0.3464863	93	-0.3173854	93	-0.3019906	93	-0.2748947	93	-0.2355606	93	-0.2381415	93	-0.2723681
93.2	-0.169938	93.2	-0.2413365	93.2	-0.1976937	93.2	-0.1834711	93.2	-0.2115675	93.2	-0.190627	93.2	-0.1669712	93.2	-0.3078069	93.2	-0.3076081	93.2	-0.3472025	93.2	-0.31133	93.2	-0.3036521	93.2	-0.2718188	93.2	-0.2398972	93.2	-0.2361534	93.2	-0.2722974
93.4	-0.1628993	93.4	-0.2367898	93.4	-0.1854248	93.4	-0.177378	93.4	-0.201211	93.4	-0.1843111	93.4	-0.1606599	93.4	-0.3054651	93.4	-0.309903	93.4	-0.3520339	93.4	-0.3140067	93.4	-0.3024725	93.4	-0.2710195	93.4	-0.2357666	93.4	-0.2415514	93.4	-0.272818
93.6	-0.1513772	93.6	-0.227253	93.6	-0.1781917	93.6	-0.1707413	93.6	-0.190131	93.6	-0.1713356	93.6	-0.1534068	93.6	-0.3089586	93.6	-0.3095249	93.6	-0.3456345	93.6	-0.3086124	93.6	-0.3018739	93.6	-0.2715661	93.6	-0.2378013	93.6	-0.2387098	93.6	-0.273497
93.8	-0.1402382	93.8	-0.2175545	93.8	-0.166417	93.8	-0.1572067	93.8	-0.1826365	93.8	-0.1623311	93.8	-0.1378897	93.8	-0.3112718	93.8	-0.3088533	93.8	-0.3488987	93.8	-0.3104906	93.8	-0.3016411	93.8	-0.271291	93.8	-0.2351866	93.8	-0.2367223	93.8	-0.2729998
94	-0.1325589	94	-0.2038677	94	-0.1558428	94	-0.1476847	94	-0.1720939	94	-0.1518176	94	-0.1317818	94	-0.3067615	94	-0.3107351	94	-0.3452115	94	-0.308297	94	-0.3029059	94	-0.2725677	94	-0.2413377	94	-0.2364061	94	-0.2717607
94.2	-0.1233411	94.2	-0.1935958	94.2	-0.1490308	94.2	-0.1332199	94.2	-0.1598929	94.2	-0.1381263	94.2	-0.1209424	94.2	-0.3049274	94.2	-0.3091952	94.2	-0.3428526	94.2	-0.3140619	94.2	-0.2992929	94.2	-0.270908	94.2	-0.2340061	94.2	-0.2334308	94.2	-0.2707392
94.4	-0.1140758	94.4	-0.1949675	94.4	-0.1393604	94.4	-0.1243159	94.4	-0.1479459	94.4	-0.1322302	94.4	-0.1117625	94.4	-0.3068946	94.4	-0.3065347	94.4	-0.3411208	94.4	-0.3108754	94.4	-0.3007012	94.4	-0.2641372	94.4	-0.238052	94.4	-0.2311962	94.4	-0.2691749
94.6	-0.1047511	94.6	-0.1791993	94.6	-0.1250565	94.6	-0.1154097	94.6	-0.1364122	94.6	-0.1254935	94.6	-0.1056671	94.6	-0.3032481	94.6	-0.3030329	94.6	-0.3419966	94.6	-0.3079625	94.6	-0.2938738	94.6	-0.2676506	94.6	-0.2327323	94.6	-0.2333223	94.6	-0.2685975
94.8	-0.09256987	94.8	-0.1695962	94.8	-0.1194359	94.8	-0.1115229	94.8	-0.1330924	94.8	-0.1155277	94.8	-0.09547796	94.8	-0.3032584	94.8	-0.3058755	94.8	-0.3454404	94.8	-0.3076996	94.8	-0.3020881	94.8	-0.2708811	94.8	-0.2350608	94.8	-0.2340575	94.8	-0.2690389
95	-0.08584817	95	-0.1623106	95	-0.1106797	95	-0.09902697	95	-0.1243602	95	-0.1060405	95	-0.08614213	95	-0.3017981	95	-0.3024673	95	-0.3397193	95	-0.3089745	95	-0.2972642	95	-0.2670768	95	-0.2334698	95	-0.238907	95	-0.2672491
95.2	-0.0761918	95.2	-0.1543934	95.2	-0.1008217	95.2	-0.09105305	95.2	-0.117211	95.2	-0.09327719	95.2	-0.07746661	95.2	-0.3055009	95.2	-0.3061825	95.2	-0.3407992	95.2	-0.3081771	95.2	-0.2991812	95.2	-0.2679513	95.2	-0.2311084	95.2	-0.2309105	95.2	-0.2657968
95.4	-0.06654917	95.4	-0.142904	95.4	-0.08659232	95.4	-0.08222759	95.4	-0.1055474	95.4	-0.08496249	95.4	-0.06401984	95.4	-0.298654	95.4	-0.3013231	95.4	-0.343888	95.4	-0.309589	95.4	-0.2944075	95.4	-0.265535	95.4	-0.2329948	95.4	-0.2350571	95.4	-0.268875
95.6	-0.05747431	95.6	-0.1329092	95.6	-0.08078907	95.6	-0.07010579	95.6	-0.0927552	95.6	-0.07857832	95.6	-0.0575476	95.6	-0.3066617	95.6	-0.3011977	95.6	-0.3352831	95.6	-0.3052176	95.6	-0.2962152	95.6	-0.2675717	95.6	-0.233794	95.6	-0.231398	95.6	-0.2653196
95.8	-0.04688652	95.8	-0.1262931	95.8	-0.07607374	95.8	-0.06382847	95.8	-0.08738312	95.8	-0.06651588	95.8	-0.04871257	95.8	-0.301947	95.8	-0.3029142	95.8	-0.3341808	95.8	-0.3010267	95.8	-0.2944674	95.8	-0.265914	95.8	-0.232361	95.8	-0.2268944	95.8	-0.2647407
96	-0.04561591	96	-0.1139722	96	-0.06421965	96	-0.05245193	96	-0.08294551	96	-0.05801918	96	-0.03571572	96	-0.3021225	96	-0.3062461	96	-0.3399508	96	-0.3053614	96	-0.2975532	96	-0.2652661	96	-0.2271887	96	-0.2304222	96	-0.2668916
96.2	-0.02764338	96.2	-0.1067756	96.2	-0.05373877	96.2	-0.04753121	96.2	-0.06913616	96.2	-0.04620745	96.2	-0.02788891	96.2	-0.3012936	96.2	-0.3021993	96.2	-0.3379849	96.2	-0.3122559	96.2	-0.2913559	96.2	-0.2661952	96.2	-0.2304431	96.2	-0.2270641	96.2	-0.2672828
96.4	-0.01700763	96.4	-0.0949695	96.4	-0.04193962	96.4	-0.03421052	96.4	-0.05581809	96.4	-0.04205451	96.4	-0.02064423	96.4	-0.3024526	96.4	-0.3008572	96.4	-0.3367944	96.4	-0.3055552	96.4	-0.2949399	96.4	-0.267095	96.4	-0.2258369	96.4	-0.2300161	96.4	-0.2670806
96.6	-0.01233775	96.6	-0.0881509	96.6	-0.03597043	96.6	-0.01910092	96.6	-0.05112838	96.6	-0.03106373	96.6	-0.00875562	96.6	-0.2982156	96.6	-0.3004396	96.6	-0.3373884	96.6	-0.3019538	96.6	-0.2953463	96.6	-0.2664388	96.6	-0.2286598	96.6	-0.228475	96.6	-0.2702135
96.8	-0.00504606	96.8	-0.08387384	96.8	-0.02465879	96.8	-0.01817415	96.8	-0.04150679	96.8	-0.01889244	96.8	-0.00636131	96.8	-0.2999863	96.8	-0.3005384	96.8	-0.3376938	96.8	-0.3045634	96.8	-0.2931676	96.8	-0.2651451	96.8	-0.2280565	96.8	-0.2284307	96.8	-0.2665252
97	0.00404909	97	-0.07124048	97	-0.01838316	97	-0.00704013	97	-0.03002725	97	-0.01298408	97	0.0066038	97	-0.2998661	97	-0.3016035	97	-0.3409949	97	-0.3070339	97	-0.2902629	97	-0.2657177	97	-0.2297135	97	-0.2298079	97	-0.2660754
97.2	0.01627453	97.2	-0.06222186	97.2	-0.01409298	97.2	0.00097315	97.2	-0.03302097	97.2	-0.00246166	97.2	0.0131604	97.2	-0.2945345	97.2	-0.3027163	97.2	-0.3350894	97.2	-0.3030316	97.2	-0.2929546	97.2	-0.2662967	97.2	-0.2262598	97.2	-0.2307878	97.2	-0.2611046
97.4	0.02861953	97.4	-0.05598348	97.4	0.00012286	97.4	0.00972472	97.4	-0.01485358	97.4	0.00374452	97.4	0.02435298	97.4	-0.3048214	97.4	-0.2982498	97.4	-0.3342572	97.4	-0.298875	97.4	-0.2953691	97.4	-0.2623808	97.4	-0.2260509	97.4	-0.2263445	97.4	-0.2647586
97.6	0.03108063	97.6	-0.04862074	97.6	0.00441853	97.6	0.01570239	97.6	-0.00812728	97.6	0.01583656	97.6	0.02800199	97.6	-0.2978103	97.6	-0.2969487	97.6	-0.3374327	97.6	-0.2999797	97.6	-0.2856638	97.6	-0.2618726	97.6	-0.2254392	97.6	-0.2250171	97.6	-0.2645745
97.8	0.04464948	97.8	-0.03913402	97.8	0.01742848	97.8	0.02210675	97.8	0.00182313	97.8	0.02113979	97.8	0.04000437	97.8	-0.2974686	97.8	-0.2986203	97.8	-0.3356623	97.8	-0.299578	97.8	-0.2923763	97.8	-0.2623259	97.8	-0.2255621	97.8	-0.2244744	97.8	-0.2638353
98	0.04747094	98	-0.025214	98	0.02534138	98	0.03330301	98	0.00517568	98	0.0303099	98	0.04923265	98	-0.2997358	98	-0.300484	98	-0.3369003	98	-0.2992139	98	-0.2925135	98	-0.2627385	98	-0.2257875	98	-0.2218487	98	-0.2615968
98.2	0.05939196	98.2	-0.01735568	98.2	0.03172466	98.2	0.04267851	98.2	0.02009302	98.2	0.03641105	98.2	0.05697114	98.2	-0.2979994	98.2	-0.2968799	98.2	-0.335853	98.2	-0.2981673	98.2	-0.2892708	98.2	-0.2597168	98.2	-0.2243138	98.2	-0.2230444	98.2	-0.2611451
98.4	0.06179966	98.4	-0.01290577	98.4	0.04012133	98.4	0.04981195	98.4	0.02333773	98.4	0.04739565	98.4	0.06825542	98.4	-0.2957677	98.4	-0.3016137	98.4	-0.334553	98.4	-0.3000824	98.4	-0.2908389	98.4	-0.2602003	98.4	-0.2287876	98.4	-0.2229505	98.4	-0.2589394
98.6	0.06807802	98.6	-0.00466099	98.6	0.04821135	98.6	0.05616529	98.6	0.03453355	98.6	0.06231363	98.6	0.07636914	98.6	-0.2935434	98.6	-0.2954346	98.6	-0.3321433	98.6	-0.3020923	98.6	-0.2909198	98.6	-0.2590285	98.6	-0.2247404	98.6	-0.225698	98.6	-0.2636185
98.8	0.08399741	98.8	0.00834869	98.8	0.05711067	98.8	0.06445299	98.8	0.0434849	98.8	0.06252488	98.8	0.08648889	98.8	-0.3037485	98.8	-0.2916056	98.8	-0.3273072	98.8	-0.2968634	98.8	-0.292821	98.8	-0.2610225	98.8	-0.2232745	98.8	-0.2236805	98.8	-0.2644905
99	0.08643408	99	0.01568816	99	0.06332844	99	0.07409739	99	0.04995365	99	0.07269409	99	0.09141082	99	-0.2974459	99	-0.2924567	99	-0.3311113	99	-0.3026309	99	-0.2856677	99	-0.260454	99	-0.2222962	99	-0.2262022	99	-0.2596917
99.2	0.09855752	99.2	0.01519883	99.2	0.07452939	99.2	0.08591314	99.2	0.05971685	99.2	0.07782669	99.2	0.1029245	99.2	-0.2976576	99.2	-0.2952389	99.2	-0.333562	99.2	-0.2982937	99.2	-0.2869703	99.2	-0.2591163	99.2	-0.2263372	99.2	-0.2230609	99.2	-0.2543767
99.4	0.1064358	99.4	0.02441135	99.4	0.08558747	99.4	0.09404524	99.4	0.0698583	99.4	0.09145436	99.4	0.1092929	99.4	-0.296638	99.4	-0.2981401	99.4	-0.3309083	99.4	-0.2976077	99.4	-0.2885567	99.4	-0.2621583	99.4	-0.2252058	99.4	-0.2196435	99.4	-0.2518426
99.6	0.1131802	99.6	0.03182153	99.6	0.08941032	99.6	0.09563918	99.6	0.07260825	99.6	0.09608726	99.6	0.1148701	99.6	-0.2957475	99.6	-0.2977563	99.6	-0.3287557	99.6	-0.2978352	99.6	-0.2883238	99.6	-0.2576349	99.6	-0.2256317	99.6	-0.2247571	99.6	-0.2573502
99.8	0.1230085	99.8	0.04757367	99.8	0.09761037	99.8	0.1090615	99.8	0.08417349	99.8	0.1007517	99.8	0.1263113	99.8	-0.290261	99.8	-0.2945079	99.8	-0.3306425	99.8	-0.2970326	99.8	-0.2826878	99.8	-0.2584241	99.8	-0.2238967	99.8	-0.2197773	99.8	-0.2553285
100	0.1301301	100	0.05170466	100	0.1048541	100	0.114382	100	0.09332532	100	0.1104931	100	0.1382413	100	-0.2966969	100	-0.2950318	100	-0.3297081	100	-0.2978908	100	-0.2864443	100	-0.2530425	100	-0.2225267	100	-0.2203796	100	-0.2567588
100.2	0.1363527	100.2	0.05606779	100.2	0.1120301	100.2	0.1263234	100.2	0.09496292	100.2	0.1214019	100.2	0.1408252	100.2	-0.2916712	100.2	-0.296412	100.2	-0.32643	100.2	-0.294951	100.2	-0.2840903	100.2	-0.2548505	100.2	-0.2202488	100.2	-0.2199231	100.2	-0.2544965
100.4	0.1443338	100.4	0.06458231	100.4	0.117503	100.4	0.1317358	100.4	0.1009469	100.4	0.1291346	100.4	0.1435673	100.4	-0.2923119	100.4	-0.2955322	100.4	-0.3322875	100.4	-0.2942088	100.4	-0.2857301	100.4	-0.2561259	100.4	-0.222045	100.4	-0.2197305	100.4	-0.2593417
100.6	0.1512359	100.6	0.07343826	100.6	0.1295094	100.6	0.1390452	100.6	0.1100334	100.6	0.1370587	100.6	0.1534524	100.6	-0.2900156	100.6	-0.2920282	100.6	-0.3275211	100.6	-0.29847	100.6	-0.2836478	100.6	-0.2540275	100.6	-0.2262334	100.6	-0.2207788	100.6	-0.2558495
100.8	0.1614937	100.8	0.08230494	100.8	0.1405797	100.8	0.1415247	100.8	0.1222689	100.8	0.1428897	100.8	0.1629343	100.8	-0.2919085	100.8	-0.2928321	100.8	-0.3327624	100.8	-0.296024	100.8	-0.2845298	100.8	-0.2537177	100.8	-0.2224126	100.8	-0.2193288	100.8	-0.2581229
101	0.1655208	101	0.08650124	101	0.1447178	101	0.152068	101	0.1274613	101	0.1484876	101	0.1714086	101	-0.2894224	101	-0.2922121	101	-0.3204637	101	-0.2953872	101	-0.2841265	101	-0.255752	101	-0.2193196	101	-0.220374	101	-0.2616497
101.2	0.1734383	101.2	0.0943508	101.2	0.1503476	101.2	0.1576429	101.2	0.1398273	101.2	0.1599395	101.2	0.1804342	101.2	-0.2890364	101.2	-0.2938368	101.2	-0.3246708	101.2	-0.2949933	101.2	-0.2805383	101.2	-0.2511281	101.2	-0.2185341	101.2	-0.2198411	101.2	-0.2518258
101.4	0.1806213	101.4	0.1012575	101.4	0.1553462	101.4	0.1649705	101.4	0.1455254	101.4	0.1687289	101.4	0.1824298	101.4	-0.2901462	101.4	-0.2917818	101.4	-0.3281354	101.4	-0.2935728	101.4	-0.2856153	101.4	-0.2526339	101.4	-0.2184064	101.4	-0.2239064	101.4	-0.2585496
101.6	0.1867825	101.6	0.1106106	101.6	0.1630966	101.6	0.1775361	101.6	0.1531848	101.6	0.1715971	101.6	0.1938573	101.6	-0.2879388	101.6	-0.2886847	101.6	-0.3261575	101.6	-0.2933452	101.6	-0.2832173	101.6	-0.2559804	101.6	-0.2159104	101.6	-0.2187386	101.6	-0.2506177
101.8	0.1945234	101.8	0.1192176	101.8	0.1723655	101.8	0.1833175	101.8	0.1581575	101.8	0.1787531	101.8	0.1978889	101.8	-0.2919364	101.8	-0.2895873	101.8	-0.3269954	101.8	-0.2954131	101.8	-0.2819785	101.8	-0.252831	101.8	-0.2178078	101.8	-0.2215695	101.8	-0.2524037
102	0.1958372	102	0.1219157	102	0.1779195	102	0.1914431	102	0.1620536	102	0.1863663	102	0.207027	102	-0.2888067	102	-0.2882221	102	-0.3284157	102	-0.2947279	102	-0.2839456	102	-0.2558298	102	-0.2154571	102	-0.2163271	102	-0.2556148
102.2	0.2058223	102.2	0.1258252	102.2	0.1855708	102.2	0.1951793	102.2	0.1731359	102.2	0.1929517	102.2	0.2147623	102.2	-0.2906436	102.2	-0.2927351	102.2	-0.3258256	102.2	-0.2913717	102.2	-0.2828367	102.2	-0.2520362	102.2	-0.2183902	102.2	-0.2126535	102.2	-0.2530043
102.4	0.2226153	102.4	0.1408227	102.4	0.1955005	102.4	0.2062994	102.4	0.1756669	102.4	0.2001087	102.4	0.220809	102.4	-0.2904854	102.4	-0.2883779	102.4	-0.3316815	102.4	-0.2895531	102.4	-0.2802615	102.4	-0.2504506	102.4	-0.2169171	102.4	-0.2163308	102.4	-0.2501934
102.6	0.2207347	102.6	0.143888	102.6	0.2028511	102.6	0.2088111	102.6	0.1810772	102.6	0.2033904	102.6	0.2270782	102.6	-0.2878897	102.6	-0.28517	102.6	-0.3209908	102.6	-0.2895833	102.6	-0.2831746	102.6	-0.2502732	102.6	-0.2184298	102.6	-0.2183226	102.6	-0.2547615
102.8	0.229112	102.8	0.1465452	102.8	0.2108866	102.8	0.218779	102.8	0.1955976	102.8	0.2160738	102.8	0.239052	102.8	-0.2871715	102.8	-0.2888068	102.8	-0.3239354	102.8	-0.2906274	102.8	-0.2807293	102.8	-0.2478516	102.8	-0.2165368	102.8	-0.2182793	102.8	-0.2523751
103	0.2373545	103	0.1606069	103	0.2194498	103	0.2256637	103	0.199544	103	0.220798	103	0.2408594	103	-0.2907594	103	-0.2865317	103	-0.3214873	103	-0.2864475	103	-0.2811641	103	-0.2465329	103	-0.2118429	103	-0.2145861	103	-0.2529084
103.2	0.2482824	103.2	0.1631337	103.2	0.2215388	103.2	0.231921	103.2	0.2015463	103.2	0.2270935	103.2	0.2527346	103.2	-0.2886373	103.2	-0.285184	103.2	-0.3229233	103.2	-0.2886396	103.2	-0.2807948	103.2	-0.2521335	103.2	-0.2190787	103.2	-0.2121985	103.2	-0.2495627
103.4	0.2507859	103.4	0.170431	103.4	0.2290511	103.4	0.2346881	103.4	0.2126833	103.4	0.2330662	103.4	0.2542187	103.4	-0.2876332	103.4	-0.287525	103.4	-0.3180995	103.4	-0.2832637	103.4	-0.277932	103.4	-0.2470745	103.4	-0.2144668	103.4	-0.2153827	103.4	-0.247079
103.6	0.2602905	103.6	0.1787867	103.6	0.2345137	103.6	0.2445917	103.6	0.2162417	103.6	0.2475519	103.6	0.263681	103.6	-0.2847473	103.6	-0.2858378	103.6	-0.3214607	103.6	-0.2881669	103.6	-0.2780014	103.6	-0.2486961	103.6	-0.2105445	103.6	-0.2135247	103.6	-0.2509687
103.8	0.2610712	103.8	0.1849921	103.8	0.2398854	103.8	0.2541883	103.8	0.2256127	103.8	0.2477353	103.8	0.2689503	103.8	-0.2859362	103.8	-0.2829604	103.8	-0.3187384	103.8	-0.2882887	103.8	-0.2756784	103.8	-0.25074	103.8	-0.2110241	103.8	-0.2093082	103.8	-0.2474875
104	0.2703342	104	0.186638	104	0.2473687	104	0.2575148	104	0.2301278	104	0.2557799	104	0.2758275	104	-0.2861329	104	-0.2931557	104	-0.3220527	104	-0.2874123	104	-0.2755556	104	-0.2459411	104	-0.213713	104	-0.2148344	104	-0.2482265
104.2	0.2779088	104.2	0.1960898	104.2	0.2570592	104.2	0.2696675	104.2	0.2365708	104.2	0.2636077	104.2	0.2823533	104.2	-0.2870586	104.2	-0.2815681	104.2	-0.3175892	104.2	-0.287438	104.2	-0.2755924	104.2	-0.2454308	104.2	-0.2114713	104.2	-0.2141397	104.2	-0.2498236
104.4	0.2811934	104.4	0.2037763	104.4	0.2607169	104.4	0.2667294	104.4	0.2415254	104.4	0.2682493	104.4	0.2923354	104.4	-0.28135	104.4	-0.2851759	104.4	-0.3195455	104.4	-0.2868081	104.4	-0.2804274	104.4	-0.2424039	104.4	-0.2105777	104.4	-0.2136576	104.4	-0.2518394
104.6	0.2893208	104.6	0.2099658	104.6	0.2657262	104.6	0.2767409	104.6	0.2473616	104.6	0.2738728	104.6	0.2943802	104.6	-0.2868416	104.6	-0.281883	104.6	-0.3165987	104.6	-0.2833932	104.6	-0.2784413	104.6	-0.2440838	104.6	-0.2083708	104.6	-0.2107693	104.6	-0.2477622
104.8	0.2938092	104.8	0.2158282	104.8	0.2711685	104.8	0.2866612	104.8	0.250827	104.8	0.281152	104.8	0.301912	104.8	-0.2852485	104.8	-0.2831799	104.8	-0.3200023	104.8	-0.2876574	104.8	-0.277808	104.8	-0.2448178	104.8	-0.2140448	104.8	-0.2148117	104.8	-0.253703
105	0.3005275	105	0.2146513	105	0.2743628	105	0.2867802	105	0.2660313	105	0.2876683	105	0.3086575	105	-0.2866183	105	-0.285081	105	-0.3184708	105	-0.2864554	105	-0.2746582	105	-0.24688	105	-0.2113666	105	-0.2099456	105	-0.2478691
105.2	0.3059303	105.2	0.226046	105.2	0.2852944	105.2	0.2936171	105.2	0.2665123	105.2	0.2925055	105.2	0.3165654	105.2	-0.2829132	105.2	-0.281074	105.2	-0.3199285	105.2	-0.2849176	105.2	-0.2719016	105.2	-0.2471243	105.2	-0.2133862	105.2	-0.2092031	105.2	-0.2511266
105.4	0.3144023	105.4	0.2344862	105.4	0.2900117	105.4	0.3024216	105.4	0.2756933	105.4	0.2992417	105.4	0.3174436	105.4	-0.2788862	105.4	-0.2829395	105.4	-0.3173391	105.4	-0.2833296	105.4	-0.2744477	105.4	-0.24645	105.4	-0.2076433	105.4	-0.2064367	105.4	-0.2469727
105.6	0.3173524	105.6	0.2387737	105.6	0.2963455	105.6	0.3058428	105.6	0.2812238	105.6	0.3020745	105.6	0.3247139	105.6	-0.2822728	105.6	-0.2808236	105.6	-0.3187245	105.6	-0.2797125	105.6	-0.2734918	105.6	-0.2453674	105.6	-0.2111432	105.6	-0.2125839	105.6	-0.2438516
105.8	0.3255945	105.8	0.2418493	105.8	0.3056268	105.8	0.3088654	105.8	0.2848348	105.8	0.3094965	105.8	0.3308758	105.8	-0.2856808	105.8	-0.2813427	105.8	-0.3203833	105.8	-0.2854767	105.8	-0.2737178	105.8	-0.2478708	105.8	-0.2104301	105.8	-0.207404	105.8	-0.2482236
106	0.330472	106	0.2456594	106	0.3122203	106	0.3215649	106	0.2943587	106	0.3144988	106	0.3408441	106	-0.279253	106	-0.2875799	106	-0.3148101	106	-0.2840654	106	-0.2738374	106	-0.2459242	106	-0.2106816	106	-0.2085933	106	-0.2547866
106.2	0.330985	106.2	0.2546602	106.2	0.3137064	106.2	0.3230809	106.2	0.2959698	106.2	0.3208101	106.2	0.3420694	106.2	-0.2774217	106.2	-0.2818862	106.2	-0.317797	106.2	-0.2828046	106.2	-0.2715062	106.2	-0.2483969	106.2	-0.208774	106.2	-0.2051485	106.2	-0.2471259
106.4	0.3443796	106.4	0.2601973	106.4	0.3199168	106.4	0.332626	106.4	0.3036814	106.4	0.3250149	106.4	0.3539083	106.4	-0.278986	106.4	-0.2844586	106.4	-0.3187802	106.4	-0.2811729	106.4	-0.2738483	106.4	-0.2420961	106.4	-0.2069034	106.4	-0.2056558	106.4	-0.2493295
106.6	0.3456476	106.6	0.2649304	106.6	0.3255071	106.6	0.3343028	106.6	0.3071119	106.6	0.3336882	106.6	0.3559876	106.6	-0.2813863	106.6	-0.2794125	106.6	-0.3146618	106.6	-0.2798799	106.6	-0.2723821	106.6	-0.2437605	106.6	-0.2068387	106.6	-0.2043496	106.6	-0.2426865
106.8	0.3559185	106.8	0.2722493	106.8	0.3338237	106.8	0.3417706	106.8	0.3171028	106.8	0.3425276	106.8	0.3612304	106.8	-0.2777166	106.8	-0.283602	106.8	-0.3161481	106.8	-0.2819839	106.8	-0.2719986	106.8	-0.2423235	106.8	-0.2034	106.8	-0.2037763	106.8	-0.2448561
107	0.3596876	107	0.2730883	107	0.3368434	107	0.3450519	107	0.3175981	107	0.347919	107	0.3633524	107	-0.2837092	107	-0.2742643	107	-0.3136388	107	-0.2817059	107	-0.2720226	107	-0.2434339	107	-0.2027388	107	-0.2085901	107	-0.2420901
107.2	0.3641482	107.2	0.2810377	107.2	0.3439443	107.2	0.3517606	107.2	0.3255276	107.2	0.3503011	107.2	0.3775436	107.2	-0.2761334	107.2	-0.2823088	107.2	-0.3105448	107.2	-0.2829323	107.2	-0.2738111	107.2	-0.2459405	107.2	-0.2082615	107.2	-0.205763	107.2	-0.2490904
107.4	0.3697217	107.4	0.2831402	107.4	0.3462189	107.4	0.355795	107.4	0.3326764	107.4	0.35582	107.4	0.3730049	107.4	-0.2801671	107.4	-0.2743841	107.4	-0.3099109	107.4	-0.2765965	107.4	-0.2718162	107.4	-0.243436	107.4	-0.2043272	107.4	-0.2102452	107.4	-0.2421937
107.6	0.3766676	107.6	0.2987455	107.6	0.3506694	107.6	0.3650162	107.6	0.337526	107.6	0.3608087	107.6	0.3792872	107.6	-0.2819035	107.6	-0.277708	107.6	-0.3153547	107.6	-0.2793714	107.6	-0.2660166	107.6	-0.2448733	107.6	-0.2044113	107.6	-0.2066592	107.6	-0.2429916
107.8	0.3773091	107.8	0.291787	107.8	0.3577469	107.8	0.3692801	107.8	0.3367466	107.8	0.3711141	107.8	0.3907042	107.8	-0.2785183	107.8	-0.2801107	107.8	-0.3115236	107.8	-0.2775445	107.8	-0.2708835	107.8	-0.2405361	107.8	-0.2060549	107.8	-0.2055155	107.8	-0.2410513
108	0.3865155	108	0.298878	108	0.3626173	108	0.3737846	108	0.347324	108	0.3760122	108	0.3909916	108	-0.2763544	108	-0.2746147	108	-0.3115276	108	-0.283802	108	-0.2705244	108	-0.2406176	108	-0.2065098	108	-0.208272	108	-0.2443003
108.2	0.3890149	108.2	0.3081169	108.2	0.3650654	108.2	0.3778021	108.2	0.3528921	108.2	0.3755219	108.2	0.4003818	108.2	-0.2761377	108.2	-0.2784193	108.2	-0.3113864	108.2	-0.2811222	108.2	-0.2701967	108.2	-0.2377106	108.2	-0.2037631	108.2	-0.2057816	108.2	-0.2435487
108.4	0.3996554	108.4	0.3161594	108.4	0.3695534	108.4	0.3850001	108.4	0.3559103	108.4	0.3828705	108.4	0.4043694	108.4	-0.2796528	108.4	-0.2718647	108.4	-0.3117137	108.4	-0.2831515	108.4	-0.2657223	108.4	-0.2408619	108.4	-0.1997473	108.4	-0.2050049	108.4	-0.2448956
108.6	0.3991138	108.6	0.3210188	108.6	0.3791579	108.6	0.3888727	108.6	0.3596853	108.6	0.387633	108.6	0.4083676	108.6	-0.2758717	108.6	-0.2748226	108.6	-0.3100703	108.6	-0.2789157	108.6	-0.2685717	108.6	-0.2424344	108.6	-0.2070199	108.6	-0.2057102	108.6	-0.2394012
108.8	0.4040041	108.8	0.3251647	108.8	0.38868	108.8	0.3952368	108.8	0.3695282	108.8	0.3904282	108.8	0.4131009	108.8	-0.2735218	108.8	-0.2746492	108.8	-0.3134503	108.8	-0.2753748	108.8	-0.269251	108.8	-0.2363876	108.8	-0.2020203	108.8	-0.2066364	108.8	-0.2481388
109	0.4118574	109	0.3274938	109	0.389413	109	0.4035132	109	0.3714199	109	0.397005	109	0.418745	109	-0.2754122	109	-0.2740224	109	-0.3106078	109	-0.2774594	109	-0.2647991	109	-0.2393719	109	-0.206551	109	-0.2032009	109	-0.2462578
109.2	0.4152578	109.2	0.3315282	109.2	0.3976793	109.2	0.4036577	109.2	0.3747906	109.2	0.4013804	109.2	0.4241658	109.2	-0.275555	109.2	-0.2742554	109.2	-0.3114561	109.2	-0.2747323	109.2	-0.2663872	109.2	-0.2354797	109.2	-0.2023899	109.2	-0.2008138	109.2	-0.2448322
109.4	0.4124284	109.4	0.3340091	109.4	0.4011016	109.4	0.4031502	109.4	0.3786276	109.4	0.4077494	109.4	0.4304674	109.4	-0.2771499	109.4	-0.273137	109.4	-0.3106462	109.4	-0.2738467	109.4	-0.2636358	109.4	-0.2345316	109.4	-0.2011711	109.4	-0.2022624	109.4	-0.2430079
109.6	0.4205399	109.6	0.3394857	109.6	0.4064694	109.6	0.4136454	109.6	0.3847921	109.6	0.4118553	109.6	0.434695	109.6	-0.2772187	109.6	-0.2735979	109.6	-0.3072992	109.6	-0.2735186	109.6	-0.2645448	109.6	-0.2388014	109.6	-0.1981194	109.6	-0.1999351	109.6	-0.2372701
109.8	0.424867	109.8	0.3498945	109.8	0.4101487	109.8	0.4154599	109.8	0.3907587	109.8	0.419091	109.8	0.4421459	109.8	-0.275159	109.8	-0.2743871	109.8	-0.307458	109.8	-0.2756949	109.8	-0.2641411	109.8	-0.2413464	109.8	-0.2094922	109.8	-0.2009045	109.8	-0.2389868
110	0.4303304	110	0.349137	110	0.4100132	110	0.4207887	110	0.3952975	110	0.4256373	110	0.4452641	110	-0.2741487	110	-0.2711273	110	-0.307976	110	-0.2789349	110	-0.2680208	110	-0.2356868	110	-0.2023761	110	-0.1977068	110	-0.2392577
110.2	0.4363013	110.2	0.3558661	110.2	0.419033	110.2	0.4231732	110.2	0.4021422	110.2	0.4257613	110.2	0.4463066	110.2	-0.2770349	110.2	-0.2721618	110.2	-0.3091379	110.2	-0.2731478	110.2	-0.260809	110.2	-0.2376332	110.2	-0.2001093	110.2	-0.2052712	110.2	-0.2413681
110.4	0.4450253	110.4	0.3597442	110.4	0.4261773	110.4	0.4337461	110.4	0.4073155	110.4	0.4273704	110.4	0.4538836	110.4	-0.2773585	110.4	-0.2712606	110.4	-0.3073714	110.4	-0.2765104	110.4	-0.2660309	110.4	-0.2364539	110.4	-0.1995046	110.4	-0.2025137	110.4	-0.241548
110.6	0.4491549	110.6	0.3651972	110.6	0.4293656	110.6	0.434012	110.6	0.4082237	110.6	0.4346806	110.6	0.457738	110.6	-0.279716	110.6	-0.2716647	110.6	-0.3038737	110.6	-0.2727115	110.6	-0.2631215	110.6	-0.2357733	110.6	-0.2023192	110.6	-0.2001119	110.6	-0.2361087
110.8	0.4480273	110.8	0.3700425	110.8	0.4353147	110.8	0.4404009	110.8	0.4103577	110.8	0.4393744	110.8	0.4648645	110.8	-0.2761737	110.8	-0.2718337	110.8	-0.3062903	110.8	-0.2766045	110.8	-0.266786	110.8	-0.2361477	110.8	-0.2025837	110.8	-0.2025398	110.8	-0.2371608
111	0.4590078	111	0.3729312	111	0.4346932	111	0.4449167	111	0.4190695	111	0.4425132	111	0.4695016	111	-0.2759042	111	-0.2670215	111	-0.3064018	111	-0.2718245	111	-0.2629067	111	-0.2346142	111	-0.1999217	111	-0.201807	111	-0.2404692
111.2	0.4613212	111.2	0.3780257	111.2	0.4433914	111.2	0.4447929	111.2	0.423401	111.2	0.4535393	111.2	0.4780089	111.2	-0.2762983	111.2	-0.2710382	111.2	-0.3094506	111.2	-0.2717313	111.2	-0.2664498	111.2	-0.2356418	111.2	-0.1985511	111.2	-0.2020855	111.2	-0.2377519
111.4	0.4651064	111.4	0.384297	111.4	0.4501441	111.4	0.4557119	111.4	0.4303977	111.4	0.4502255	111.4	0.4760675	111.4	-0.2703755	111.4	-0.2670023	111.4	-0.3056375	111.4	-0.2749498	111.4	-0.2655885	111.4	-0.231139	111.4	-0.1966314	111.4	-0.1980779	111.4	-0.2386972
111.6	0.4741611	111.6	0.3886391	111.6	0.4560569	111.6	0.4610035	111.6	0.4326002	111.6	0.4609691	111.6	0.4813139	111.6	-0.2705418	111.6	-0.2707092	111.6	-0.3056066	111.6	-0.2772806	111.6	-0.2615659	111.6	-0.2331636	111.6	-0.2002965	111.6	-0.1976056	111.6	-0.2383193
111.8	0.4729379	111.8	0.3887484	111.8	0.4518229	111.8	0.4632373	111.8	0.4442157	111.8	0.4634897	111.8	0.484384	111.8	-0.2718489	111.8	-0.2692294	111.8	-0.3030519	111.8	-0.2724088	111.8	-0.2580896	111.8	-0.2309398	111.8	-0.1943873	111.8	-0.2011169	111.8	-0.2415633
112	0.4725872	112	0.3965637	112	0.4621148	112	0.4648359	112	0.4439839	112	0.4659094	112	0.4897749	112	-0.2711532	112	-0.2685404	112	-0.3062061	112	-0.2715115	112	-0.2630212	112	-0.2331116	112	-0.2008365	112	-0.1968817	112	-0.2327698
112.2	0.4871065	112.2	0.4028108	112.2	0.4663108	112.2	0.4725163	112.2	0.4471954	112.2	0.4711039	112.2	0.4943545	112.2	-0.2735969	112.2	-0.2705537	112.2	-0.307706	112.2	-0.2717844	112.2	-0.263487	112.2	-0.2356254	112.2	-0.1938349	112.2	-0.1982428	112.2	-0.2362372
112.4	0.4835727	112.4	0.4035344	112.4	0.4698524	112.4	0.4799908	112.4	0.448691	112.4	0.4776727	112.4	0.4971514	112.4	-0.2748389	112.4	-0.2705678	112.4	-0.3045138	112.4	-0.2657845	112.4	-0.2577276	112.4	-0.2319662	112.4	-0.1946131	112.4	-0.1975257	112.4	-0.2388308
112.6	0.4861647	112.6	0.4061321	112.6	0.4748249	112.6	0.4826024	112.6	0.4535034	112.6	0.480222	112.6	0.5046492	112.6	-0.2738764	112.6	-0.2664129	112.6	-0.3038238	112.6	-0.2693183	112.6	-0.2587685	112.6	-0.230338	112.6	-0.1951682	112.6	-0.1938	112.6	-0.2382714
112.8	0.496075	112.8	0.4157256	112.8	0.4753014	112.8	0.4875279	112.8	0.462015	112.8	0.4846355	112.8	0.5104473	112.8	-0.2742444	112.8	-0.2690332	112.8	-0.2999001	112.8	-0.2697292	112.8	-0.256962	112.8	-0.2321596	112.8	-0.1969439	112.8	-0.1940325	112.8	-0.2366768
113	0.4999721	113	0.4184375	113	0.4797691	113	0.4846913	113	0.4621827	113	0.4931318	113	0.507358	113	-0.273572	113	-0.2678453	113	-0.2997505	113	-0.2720308	113	-0.2616934	113	-0.2291616	113	-0.1938024	113	-0.1968936	113	-0.2371278
113.2	0.5030393	113.2	0.4201325	113.2	0.4847458	113.2	0.492295	113.2	0.4717219	113.2	0.4918747	113.2	0.5185679	113.2	-0.2679478	113.2	-0.2671936	113.2	-0.3020585	113.2	-0.2692209	113.2	-0.2587071	113.2	-0.233231	113.2	-0.1963412	113.2	-0.1982512	113.2	-0.2338613
113.4	0.5046498	113.4	0.4293448	113.4	0.484573	113.4	0.4946156	113.4	0.4678348	113.4	0.4980236	113.4	0.5170929	113.4	-0.2627562	113.4	-0.2676187	113.4	-0.2982652	113.4	-0.2666292	113.4	-0.2610795	113.4	-0.2243525	113.4	-0.1936742	113.4	-0.1938872	113.4	-0.2369481
113.6	0.5137018	113.6	0.4265402	113.6	0.4944243	113.6	0.5036978	113.6	0.478823	113.6	0.5037043	113.6	0.5273438	113.6	-0.2706022	113.6	-0.2647966	113.6	-0.3011712	113.6	-0.267757	113.6	-0.2585884	113.6	-0.2294565	113.6	-0.1943877	113.6	-0.1977077	113.6	-0.2326076
113.8	0.5085581	113.8	0.4327273	113.8	0.496634	113.8	0.5056947	113.8	0.4785197	113.8	0.506572	113.8	0.5332514	113.8	-0.2674887	113.8	-0.2646654	113.8	-0.3020658	113.8	-0.2681932	113.8	-0.2586183	113.8	-0.230652	113.8	-0.1941231	113.8	-0.1944488	113.8	-0.2355756
114	0.5161248	114	0.43633	114	0.5020223	114	0.5104436	114	0.4762592	114	0.5118855	114	0.5286399	114	-0.2661836	114	-0.2652971	114	-0.3008212	114	-0.2700318	114	-0.2594807	114	-0.2270293	114	-0.1958931	114	-0.1958172	114	-0.2335232
114.2	0.522441	114.2	0.4414268	114.2	0.5081176	114.2	0.5158322	114.2	0.4840617	114.2	0.5166694	114.2	0.5341036	114.2	-0.2737742	114.2	-0.2630796	114.2	-0.2995389	114.2	-0.2701324	114.2	-0.2596863	114.2	-0.2282622	114.2	-0.1910741	114.2	-0.1987547	114.2	-0.2389912
114.4	0.5286298	114.4	0.4436462	114.4	0.5129938	114.4	0.5164438	114.4	0.4907457	114.4	0.5176522	114.4	0.5386567	114.4	-0.2678118	114.4	-0.2630115	114.4	-0.2975318	114.4	-0.267341	114.4	-0.2578538	114.4	-0.226693	114.4	-0.1872686	114.4	-0.1931619	114.4	-0.2306758
114.6	0.5328212	114.6	0.4504204	114.6	0.5171137	114.6	0.5229055	114.6	0.4938348	114.6	0.5210313	114.6	0.5421523	114.6	-0.2626866	114.6	-0.2640141	114.6	-0.2982802	114.6	-0.268113	114.6	-0.2552462	114.6	-0.2283457	114.6	-0.1927528	114.6	-0.1946223	114.6	-0.2321914
114.8	0.5348138	114.8	0.4491414	114.8	0.5169997	114.8	0.5266681	114.8	0.4982335	114.8	0.5244053	114.8	0.5487127	114.8	-0.2686111	114.8	-0.2653446	114.8	-0.2943968	114.8	-0.2698492	114.8	-0.2552337	114.8	-0.2259414	114.8	-0.1921514	114.8	-0.1950782	114.8	-0.2351917
115	0.5350859	115	0.4524415	115	0.5201836	115	0.5262435	115	0.5000021	115	0.5276018	115	0.5529934	115	-0.2635907	115	-0.2640356	115	-0.3012006	115	-0.2625565	115	-0.2585746	115	-0.2298721	115	-0.1898885	115	-0.1953383	115	-0.2320746
115.2	0.5412241	115.2	0.4574234	115.2	0.5245451	115.2	0.5297583	115.2	0.5026112	115.2	0.5349809	115.2	0.5569332	115.2	-0.2699566	115.2	-0.2666617	115.2	-0.3003237	115.2	-0.269122	115.2	-0.2604508	115.2	-0.2246305	115.2	-0.1893273	115.2	-0.1922032	115.2	-0.2342197
115.4	0.5441803	115.4	0.4624918	115.4	0.5256956	115.4	0.5336977	115.4	0.5093727	115.4	0.5363631	115.4	0.5629594	115.4	-0.2642276	115.4	-0.2617891	115.4	-0.3024453	115.4	-0.2726378	115.4	-0.2566019	115.4	-0.2276273	115.4	-0.1901251	115.4	-0.1910507	115.4	-0.2361225
115.6	0.5469439	115.6	0.464779	115.6	0.536532	115.6	0.5426	115.6	0.510918	115.6	0.5407651	115.6	0.5622112	115.6	-0.267543	115.6	-0.2623368	115.6	-0.2971373	115.6	-0.266376	115.6	-0.2545615	115.6	-0.2249278	115.6	-0.1904502	115.6	-0.1923041	115.6	-0.2350153
115.8	0.5533257	115.8	0.4715293	115.8	0.5308536	115.8	0.540931	115.8	0.5221754	115.8	0.546917	115.8	0.5671295	115.8	-0.2660535	115.8	-0.2612699	115.8	-0.2973222	115.8	-0.26688	115.8	-0.2554051	115.8	-0.2241226	115.8	-0.1852356	115.8	-0.1903929	115.8	-0.2291624
116	0.5524097	116	0.4759188	116	0.5381642	116	0.5439708	116	0.5204513	116	0.5458536	116	0.5667008	116	-0.2668435	116	-0.2656036	116	-0.298339	116	-0.2593788	116	-0.2552213	116	-0.2273795	116	-0.1868638	116	-0.1872174	116	-0.227163
116.2	0.5581629	116.2	0.4779966	116.2	0.5427681	116.2	0.5517197	116.2	0.52161	116.2	0.5528628	116.2	0.5768087	116.2	-0.2659842	116.2	-0.2571054	116.2	-0.2951353	116.2	-0.2592321	116.2	-0.2584058	116.2	-0.2225136	116.2	-0.1912367	116.2	-0.1950029	116.2	-0.2321322
116.4	0.5599849	116.4	0.4823451	116.4	0.5455109	116.4	0.5525252	116.4	0.5249727	116.4	0.557986	116.4	0.5767808	116.4	-0.2658836	116.4	-0.2590232	116.4	-0.2983051	116.4	-0.2651431	116.4	-0.2588934	116.4	-0.220641	116.4	-0.189029	116.4	-0.192705	116.4	-0.2269332
116.6	0.5640349	116.6	0.4817521	116.6	0.5466732	116.6	0.5562375	116.6	0.5287772	116.6	0.5602562	116.6	0.5802267	116.6	-0.2637575	116.6	-0.2617465	116.6	-0.2987382	116.6	-0.2646945	116.6	-0.2579122	116.6	-0.2290527	116.6	-0.1886578	116.6	-0.1926039	116.6	-0.2305716
116.8	0.5687314	116.8	0.4884539	116.8	0.5531719	116.8	0.5667504	116.8	0.5329455	116.8	0.5631589	116.8	0.5796173	116.8	-0.2690934	116.8	-0.2616212	116.8	-0.2980858	116.8	-0.2632984	116.8	-0.2525508	116.8	-0.2257081	116.8	-0.1872451	116.8	-0.1877464	116.8	-0.23064
117	0.569891	117	0.4923342	117	0.5553492	117	0.5625831	117	0.537599	117	0.5656177	117	0.5909232	117	-0.2622279	117	-0.2550638	117	-0.2958604	117	-0.2651176	117	-0.2505662	117	-0.2244544	117	-0.1882095	117	-0.1901331	117	-0.2289426
117.2	0.5765379	117.2	0.4949561	117.2	0.5575939	117.2	0.5665585	117.2	0.5411313	117.2	0.5713802	117.2	0.594311	117.2	-0.2612862	117.2	-0.2577056	117.2	-0.293738	117.2	-0.2613711	117.2	-0.2522202	117.2	-0.2268252	117.2	-0.1876103	117.2	-0.1890134	117.2	-0.2268725
117.4	0.5809689	117.4	0.4979871	117.4	0.5635162	117.4	0.5750825	117.4	0.5433877	117.4	0.5730456	117.4	0.5936908	117.4	-0.2615374	117.4	-0.2613665	117.4	-0.2973103	117.4	-0.2618172	117.4	-0.2513001	117.4	-0.2249072	117.4	-0.1848026	117.4	-0.1880075	117.4	-0.2290281
117.6	0.5769619	117.6	0.4995556	117.6	0.5638369	117.6	0.5752314	117.6	0.5483247	117.6	0.5737378	117.6	0.6023385	117.6	-0.2611974	117.6	-0.2593931	117.6	-0.2961883	117.6	-0.2638073	117.6	-0.2511367	117.6	-0.2238435	117.6	-0.1822158	117.6	-0.187096	117.6	-0.2308362
117.8	0.5790361	117.8	0.5025574	117.8	0.5717627	117.8	0.5752656	117.8	0.5549752	117.8	0.5758649	117.8	0.5998209	117.8	-0.2647456	117.8	-0.2596901	117.8	-0.2944343	117.8	-0.2568251	117.8	-0.2521929	117.8	-0.2201303	117.8	-0.1853067	117.8	-0.1884589	117.8	-0.2306799
118	0.5872613	118	0.5061356	118	0.5758451	118	0.5729125	118	0.5545915	118	0.5839273	118	0.6038258	118	-0.2604169	118	-0.2605034	118	-0.2970228	118	-0.2626413	118	-0.2558539	118	-0.2259506	118	-0.1854967	118	-0.1856529	118	-0.2328721
118.2	0.5906795	118.2	0.5139354	118.2	0.5737268	118.2	0.5857598	118.2	0.5575995	118.2	0.5844685	118.2	0.6064283	118.2	-0.2623441	118.2	-0.2589512	118.2	-0.2943459	118.2	-0.2651475	118.2	-0.2517197	118.2	-0.222626	118.2	-0.1848942	118.2	-0.1922595	118.2	-0.2258292
118.4	0.5961131	118.4	0.5159945	118.4	0.5783941	118.4	0.5854437	118.4	0.561282	118.4	0.5880051	118.4	0.6127303	118.4	-0.2626856	118.4	-0.2570817	118.4	-0.2948295	118.4	-0.2620913	118.4	-0.2516714	118.4	-0.2228412	118.4	-0.1874481	118.4	-0.1847451	118.4	-0.232064
118.6	0.5959992	118.6	0.5181382	118.6	0.585011	118.6	0.5930331	118.6	0.5619195	118.6	0.5919668	118.6	0.6189234	118.6	-0.2567232	118.6	-0.2615983	118.6	-0.292123	118.6	-0.2601739	118.6	-0.2543555	118.6	-0.2185937	118.6	-0.1860453	118.6	-0.1909055	118.6	-0.2303251
118.8	0.6026158	118.8	0.5232062	118.8	0.5887302	118.8	0.5924244	118.8	0.5644092	118.8	0.5961054	118.8	0.6192604	118.8	-0.2589476	118.8	-0.2569297	118.8	-0.2926202	118.8	-0.2637995	118.8	-0.2489504	118.8	-0.2223262	118.8	-0.1897743	118.8	-0.1864278	118.8	-0.2272671
119	0.6026601	119	0.5252813	119	0.5915258	119	0.5997325	119	0.5674536	119	0.5954897	119	0.621888	119	-0.258519	119	-0.2600595	119	-0.2914106	119	-0.2609346	119	-0.2522433	119	-0.2194325	119	-0.184031	119	-0.1837788	119	-0.2283644
119.2	0.6074246	119.2	0.5294122	119.2	0.5943335	119.2	0.5980079	119.2	0.5762439	119.2	0.6051725	119.2	0.627445	119.2	-0.259442	119.2	-0.2541708	119.2	-0.2957332	119.2	-0.2598678	119.2	-0.2486248	119.2	-0.2190114	119.2	-0.1857208	119.2	-0.1842686	119.2	-0.2257633
119.4	0.6097977	119.4	0.5266736	119.4	0.5956427	119.4	0.601317	119.4	0.5780809	119.4	0.6039451	119.4	0.6290129	119.4	-0.2682011	119.4	-0.2519704	119.4	-0.2909908	119.4	-0.2595569	119.4	-0.2480687	119.4	-0.2217657	119.4	-0.1843866	119.4	-0.1832588	119.4	-0.225385
119.6	0.6110148	119.6	0.5308449	119.6	0.6012948	119.6	0.6062046	119.6	0.5820906	119.6	0.6071348	119.6	0.6320753	119.6	-0.2603513	119.6	-0.2593874	119.6	-0.2931941	119.6	-0.2581745	119.6	-0.2440712	119.6	-0.2191216	119.6	-0.1866871	119.6	-0.1857422	119.6	-0.229279
119.8	0.6141695	119.8	0.5361944	119.8	0.604769	119.8	0.6055801	119.8	0.5840561	119.8	0.6100177	119.8	0.6334916	119.8	-0.261445	119.8	-0.2558969	119.8	-0.287057	119.8	-0.2553734	119.8	-0.2494389	119.8	-0.2169411	119.8	-0.1876525	119.8	-0.1828482	119.8	-0.2289277
120	0.6205834	120	0.5383644	120	0.6077985	120	0.6111992	120	0.5898857	120	0.6148087	120	0.6410497	120	-0.2600335	120	-0.2559104	120	-0.2919536	120	-0.2614198	120	-0.2477505	120	-0.2170385	120	-0.1877947	120	-0.1871397	120	-0.2260782
120.2	0.6238633	120.2	0.5488375	120.2	0.6087196	120.2	0.6171375	120.2	0.5894262	120.2	0.6192047	120.2	0.6387508	120.2	-0.2590902	120.2	-0.2599772	120.2	-0.2890689	120.2	-0.2600254	120.2	-0.2533798	120.2	-0.2158826	120.2	-0.1848775	120.2	-0.1854827	120.2	-0.2253336
120.4	0.6283255	120.4	0.5456628	120.4	0.6101537	120.4	0.6183637	120.4	0.5946064	120.4	0.6167755	120.4	0.6410791	120.4	-0.258524	120.4	-0.2550747	120.4	-0.2893362	120.4	-0.2603781	120.4	-0.2514661	120.4	-0.218829	120.4	-0.1812674	120.4	-0.1798053	120.4	-0.2233059
120.6	0.6290541	120.6	0.55039	120.6	0.6126528	120.6	0.6216198	120.6	0.5958233	120.6	0.6262093	120.6	0.6478562	120.6	-0.2609512	120.6	-0.2506692	120.6	-0.2866099	120.6	-0.259792	120.6	-0.2534817	120.6	-0.2165019	120.6	-0.181169	120.6	-0.1859855	120.6	-0.2259644
120.8	0.6331213	120.8	0.5493083	120.8	0.6179019	120.8	0.625346	120.8	0.5954228	120.8	0.6284549	120.8	0.6498601	120.8	-0.2580053	120.8	-0.2573611	120.8	-0.2899902	120.8	-0.2566536	120.8	-0.2485775	120.8	-0.2171926	120.8	-0.1857227	120.8	-0.1914262	120.8	-0.2272154
121	0.635783	121	0.5525406	121	0.6167197	121	0.628666	121	0.6035795	121	0.6335458	121	0.6572852	121	-0.2626425	121	-0.2513337	121	-0.2865354	121	-0.2560142	121	-0.2518122	121	-0.2212832	121	-0.1816703	121	-0.1825442	121	-0.2278615
121.2	0.6334462	121.2	0.5568194	121.2	0.6229495	121.2	0.6334349	121.2	0.6030667	121.2	0.628427	121.2	0.6590087	121.2	-0.2572176	121.2	-0.2527011	121.2	-0.2851762	121.2	-0.259786	121.2	-0.2515684	121.2	-0.2167279	121.2	-0.1820731	121.2	-0.1853199	121.2	-0.2290672
121.4	0.6402467	121.4	0.5586137	121.4	0.6270689	121.4	0.6288825	121.4	0.6059569	121.4	0.6360559	121.4	0.6584835	121.4	-0.260578	121.4	-0.2526765	121.4	-0.2909793	121.4	-0.2574026	121.4	-0.2463434	121.4	-0.2188001	121.4	-0.1822732	121.4	-0.1827178	121.4	-0.2266935
121.6	0.638721	121.6	0.564115	121.6	0.6275483	121.6	0.6362342	121.6	0.6087997	121.6	0.6380809	121.6	0.6684353	121.6	-0.260324	121.6	-0.2560701	121.6	-0.2833712	121.6	-0.2552701	121.6	-0.2450144	121.6	-0.2155661	121.6	-0.1770566	121.6	-0.188276	121.6	-0.2232506
121.8	0.6490549	121.8	0.5648893	121.8	0.633334	121.8	0.6416818	121.8	0.6121259	121.8	0.6426466	121.8	0.6654835	121.8	-0.2555774	121.8	-0.2497939	121.8	-0.2881378	121.8	-0.256264	121.8	-0.244922	121.8	-0.2174222	121.8	-0.1768825	121.8	-0.1818682	121.8	-0.2219171
122	0.6482078	122	0.5668216	122	0.6382921	122	0.6405849	122	0.6188858	122	0.6476625	122	0.6691152	122	-0.2534502	122	-0.2498615	122	-0.2866622	122	-0.2534493	122	-0.2445361	122	-0.2136957	122	-0.1787025	122	-0.182274	122	-0.223789
122.2	0.6509694	122.2	0.5708159	122.2	0.6362752	122.2	0.6471111	122.2	0.6180398	122.2	0.6494945	122.2	0.6704314	122.2	-0.2566858	122.2	-0.249231	122.2	-0.2883612	122.2	-0.2476135	122.2	-0.2451078	122.2	-0.2143503	122.2	-0.1828755	122.2	-0.1799988	122.2	-0.2244763
122.4	0.6553978	122.4	0.5728657	122.4	0.6418174	122.4	0.6505918	122.4	0.6216269	122.4	0.6513105	122.4	0.6744859	122.4	-0.2514832	122.4	-0.2467591	122.4	-0.2851408	122.4	-0.2555526	122.4	-0.2454717	122.4	-0.2148192	122.4	-0.1774829	122.4	-0.1788726	122.4	-0.219837
122.6	0.6573055	122.6	0.575076	122.6	0.6413381	122.6	0.6523622	122.6	0.6245596	122.6	0.6550309	122.6	0.6743616	122.6	-0.256463	122.6	-0.2476711	122.6	-0.2824274	122.6	-0.2561522	122.6	-0.2487997	122.6	-0.2140553	122.6	-0.1792479	122.6	-0.1776822	122.6	-0.2181241
122.8	0.6591538	122.8	0.5831127	122.8	0.6484132	122.8	0.6508158	122.8	0.6282988	122.8	0.657882	122.8	0.6773463	122.8	-0.2562743	122.8	-0.2533591	122.8	-0.2843349	122.8	-0.2562238	122.8	-0.2491644	122.8	-0.2116995	122.8	-0.1786883	122.8	-0.1775565	122.8	-0.2218003
123	0.6599428	123	0.5866238	123	0.6439442	123	0.6544165	123	0.6274652	123	0.6571119	123	0.6805767	123	-0.2556514	123	-0.2515697	123	-0.2890796	123	-0.2504329	123	-0.2405152	123	-0.2158764	123	-0.1793647	123	-0.1789369	123	-0.2247915
123.2	0.6638303	123.2	0.582998	123.2	0.6531483	123.2	0.657652	123.2	0.6351054	123.2	0.6683086	123.2	0.6894325	123.2	-0.2579362	123.2	-0.2507502	123.2	-0.2834903	123.2	-0.2517547	123.2	-0.2419598	123.2	-0.2138199	123.2	-0.1775685	123.2	-0.1784069	123.2	-0.2250615
123.4	0.6678087	123.4	0.5902664	123.4	0.654698	123.4	0.6615924	123.4	0.6344173	123.4	0.6644646	123.4	0.6866644	123.4	-0.2563559	123.4	-0.252879	123.4	-0.2864577	123.4	-0.2504835	123.4	-0.2456615	123.4	-0.2111204	123.4	-0.1786523	123.4	-0.1826955	123.4	-0.2184284
123.6	0.669072	123.6	0.591606	123.6	0.6590052	123.6	0.6671312	123.6	0.6393573	123.6	0.6660467	123.6	0.6918663	123.6	-0.2539104	123.6	-0.2499454	123.6	-0.2885743	123.6	-0.2573995	123.6	-0.2425233	123.6	-0.2123024	123.6	-0.1793107	123.6	-0.1849823	123.6	-0.2196723
123.8	0.672772	123.8	0.5972542	123.8	0.6584584	123.8	0.6689652	123.8	0.6385676	123.8	0.668665	123.8	0.6894248	123.8	-0.2584388	123.8	-0.2454347	123.8	-0.2792207	123.8	-0.2526615	123.8	-0.241466	123.8	-0.2149179	123.8	-0.1758426	123.8	-0.1775386	123.8	-0.2198086
124	0.6770605	124	0.6019473	124	0.6630694	124	0.6730827	124	0.6405032	124	0.6742601	124	0.6957126	124	-0.2537595	124	-0.2477064	124	-0.2828065	124	-0.252353	124	-0.2413278	124	-0.2144796	124	-0.1763683	124	-0.1784365	124	-0.2172711
124.2	0.6823022	124.2	0.5962	124.2	0.6676338	124.2	0.6759696	124.2	0.6472448	124.2	0.675013	124.2	0.6990926	124.2	-0.2513395	124.2	-0.2502957	124.2	-0.2871147	124.2	-0.2523902	124.2	-0.2409988	124.2	-0.2137352	124.2	-0.1738131	124.2	-0.1787479	124.2	-0.220471
124.4	0.6844841	124.4	0.5978045	124.4	0.6696289	124.4	0.6778042	124.4	0.6484553	124.4	0.683497	124.4	0.7026673	124.4	-0.2538884	124.4	-0.2458121	124.4	-0.2876438	124.4	-0.2484745	124.4	-0.2439753	124.4	-0.2105775	124.4	-0.1756388	124.4	-0.1785457	124.4	-0.2229513
124.6	0.6835747	124.6	0.6056411	124.6	0.6698567	124.6	0.6813227	124.6	0.6493121	124.6	0.6791694	124.6	0.7067172	124.6	-0.2534128	124.6	-0.2482969	124.6	-0.2826189	124.6	-0.2549835	124.6	-0.2439269	124.6	-0.2105334	124.6	-0.1729019	124.6	-0.1749113	124.6	-0.2155088
124.8	0.6857508	124.8	0.6049908	124.8	0.6735509	124.8	0.67918	124.8	0.6493136	124.8	0.680602	124.8	0.7075967	124.8	-0.2559535	124.8	-0.2489733	124.8	-0.2783963	124.8	-0.2528943	124.8	-0.2400455	124.8	-0.2119635	124.8	-0.1728326	124.8	-0.1760339	124.8	-0.2201159
125	0.6894294	125	0.6082575	125	0.680587	125	0.6823103	125	0.6515304	125	0.6885544	125	0.7129079	125	-0.2491641	125	-0.2502817	125	-0.2827837	125	-0.2506402	125	-0.2382346	125	-0.2103593	125	-0.1755216	125	-0.177174	125	-0.2214953
125.2	0.6888409	125.2	0.6147889	125.2	0.6733756	125.2	0.6861705	125.2	0.6580703	125.2	0.6939354	125.2	0.7078782	125.2	-0.2527166	125.2	-0.2480129	125.2	-0.282227	125.2	-0.2450661	125.2	-0.2426138	125.2	-0.2122907	125.2	-0.1705342	125.2	-0.1731132	125.2	-0.2214484
125.4	0.6946316	125.4	0.6105044	125.4	0.678951	125.4	0.6909459	125.4	0.662668	125.4	0.6932922	125.4	0.7109919	125.4	-0.2536258	125.4	-0.2475634	125.4	-0.2771532	125.4	-0.2487527	125.4	-0.2390801	125.4	-0.2109465	125.4	-0.1738849	125.4	-0.1736623	125.4	-0.2162076
125.6	0.6932945	125.6	0.616807	125.6	0.6852865	125.6	0.6924816	125.6	0.6648077	125.6	0.6901372	125.6	0.7152307	125.6	-0.2552819	125.6	-0.2538379	125.6	-0.279562	125.6	-0.2478529	125.6	-0.2399497	125.6	-0.2121685	125.6	-0.1728684	125.6	-0.1750428	125.6	-0.2142979
125.8	0.6945536	125.8	0.6198365	125.8	0.6871092	125.8	0.6895242	125.8	0.6688558	125.8	0.6939505	125.8	0.7220072	125.8	-0.2511399	125.8	-0.2472689	125.8	-0.286022	125.8	-0.2522879	125.8	-0.2390969	125.8	-0.2097817	125.8	-0.174209	125.8	-0.178508	125.8	-0.2131694
126	0.6980621	126	0.6209924	126	0.6887922	126	0.6942508	126	0.6681156	126	0.699246	126	0.7203231	126	-0.2542619	126	-0.2456333	126	-0.2789944	126	-0.24938	126	-0.2348717	126	-0.2104055	126	-0.1746951	126	-0.1730401	126	-0.219177
126.2	0.7000853	126.2	0.6209539	126.2	0.6926465	126.2	0.6942162	126.2	0.6711494	126.2	0.7038159	126.2	0.7191346	126.2	-0.2539183	126.2	-0.2509511	126.2	-0.2810695	126.2	-0.2474262	126.2	-0.2388561	126.2	-0.2140014	126.2	-0.1752684	126.2	-0.1754549	126.2	-0.2179852
126.4	0.7052794	126.4	0.6221301	126.4	0.6938026	126.4	0.6977614	126.4	0.6767765	126.4	0.704722	126.4	0.7259359	126.4	-0.2496229	126.4	-0.2471574	126.4	-0.2834112	126.4	-0.25278	126.4	-0.2383001	126.4	-0.21262	126.4	-0.1735682	126.4	-0.1739809	126.4	-0.2163153
126.6	0.7042218	126.6	0.6263181	126.6	0.6952447	126.6	0.6993195	126.6	0.6745747	126.6	0.7028067	126.6	0.7299348	126.6	-0.2504725	126.6	-0.2456983	126.6	-0.2789434	126.6	-0.2463316	126.6	-0.242622	126.6	-0.2100871	126.6	-0.1765603	126.6	-0.1731466	126.6	-0.2158436
126.8	0.7074882	126.8	0.6263515	126.8	0.6975814	126.8	0.7026373	126.8	0.6753087	126.8	0.7079239	126.8	0.7351777	126.8	-0.249394	126.8	-0.2457555	126.8	-0.280367	126.8	-0.2506404	126.8	-0.2364339	126.8	-0.2106376	126.8	-0.1737727	126.8	-0.1774548	126.8	-0.2162719
127	0.708788	127	0.6347938	127	0.6978037	127	0.7032126	127	0.6821123	127	0.7105393	127	0.7299017	127	-0.2477136	127	-0.2458278	127	-0.2766244	127	-0.2483083	127	-0.2360815	127	-0.2068866	127	-0.1719389	127	-0.1772419	127	-0.2133487
127.2	0.714753	127.2	0.6360989	127.2	0.7030118	127.2	0.7109042	127.2	0.6814302	127.2	0.7157395	127.2	0.7323349	127.2	-0.2497777	127.2	-0.2448303	127.2	-0.2787731	127.2	-0.2462933	127.2	-0.2375844	127.2	-0.2074074	127.2	-0.1714333	127.2	-0.1723335	127.2	-0.2207667
127.4	0.7118837	127.4	0.6385007	127.4	0.7090266	127.4	0.7105049	127.4	0.6883096	127.4	0.7152579	127.4	0.7394757	127.4	-0.2437834	127.4	-0.2426409	127.4	-0.2795181	127.4	-0.2463753	127.4	-0.2381442	127.4	-0.2072103	127.4	-0.1708698	127.4	-0.1732477	127.4	-0.2152139
127.6	0.7182249	127.6	0.6354873	127.6	0.7074392	127.6	0.7149311	127.6	0.6861968	127.6	0.7118449	127.6	0.7398559	127.6	-0.2514525	127.6	-0.239387	127.6	-0.2761979	127.6	-0.248638	127.6	-0.236936	127.6	-0.204875	127.6	-0.1735363	127.6	-0.1757136	127.6	-0.2131714
127.8	0.7230115	127.8	0.6457477	127.8	0.7081493	127.8	0.711664	127.8	0.6843471	127.8	0.7219899	127.8	0.7425439	127.8	-0.2521493	127.8	-0.2433786	127.8	-0.276734	127.8	-0.2475809	127.8	-0.2432823	127.8	-0.2038048	127.8	-0.169708	127.8	-0.1738101	127.8	-0.2173885
128	0.7208422	128	0.6444653	128	0.712042	128	0.7207104	128	0.6870629	128	0.7205831	128	0.7466084	128	-0.2493512	128	-0.2407088	128	-0.2774153	128	-0.2456245	128	-0.2344859	128	-0.2110439	128	-0.1740267	128	-0.1708548	128	-0.2126999
128.2	0.7229055	128.2	0.6428583	128.2	0.7147689	128.2	0.7189355	128.2	0.6920851	128.2	0.7222497	128.2	0.74473	128.2	-0.2459831	128.2	-0.2445287	128.2	-0.2741854	128.2	-0.2450419	128.2	-0.2432961	128.2	-0.2036273	128.2	-0.1707465	128.2	-0.1698856	128.2	-0.2134786
128.4	0.7274669	128.4	0.6481825	128.4	0.7138896	128.4	0.7233356	128.4	0.692474	128.4	0.7310137	128.4	0.7490867	128.4	-0.2467605	128.4	-0.2470196	128.4	-0.2777027	128.4	-0.2422718	128.4	-0.2326352	128.4	-0.2098617	128.4	-0.1728105	128.4	-0.1733173	128.4	-0.2164509
128.6	0.7293032	128.6	0.64889	128.6	0.7176289	128.6	0.7264801	128.6	0.6996328	128.6	0.7320533	128.6	0.7525673	128.6	-0.2528049	128.6	-0.2410594	128.6	-0.2770047	128.6	-0.2493885	128.6	-0.232862	128.6	-0.2095681	128.6	-0.1721603	128.6	-0.172849	128.6	-0.2140021
128.8	0.734619	128.8	0.6519812	128.8	0.7214576	128.8	0.7267012	128.8	0.6985518	128.8	0.7340249	128.8	0.7550313	128.8	-0.2478455	128.8	-0.2413819	128.8	-0.2758918	128.8	-0.2435928	128.8	-0.2387618	128.8	-0.2070644	128.8	-0.1660278	128.8	-0.1723197	128.8	-0.215691
129	0.7349365	129	0.652921	129	0.7178411	129	0.730915	129	0.7012557	129	0.736551	129	0.7610395	129	-0.2507029	129	-0.2441209	129	-0.2804678	129	-0.2495036	129	-0.2401152	129	-0.2045329	129	-0.1718529	129	-0.178701	129	-0.2114875
129.2	0.7410357	129.2	0.6597227	129.2	0.7268593	129.2	0.7308743	129.2	0.7026814	129.2	0.7409685	129.2	0.7596371	129.2	-0.2444439	129.2	-0.2413793	129.2	-0.2745031	129.2	-0.2459744	129.2	-0.2353604	129.2	-0.2005054	129.2	-0.1693669	129.2	-0.174476	129.2	-0.2161278
129.4	0.7369448	129.4	0.6597909	129.4	0.7234792	129.4	0.733071	129.4	0.7084674	129.4	0.7368673	129.4	0.7590231	129.4	-0.2413774	129.4	-0.2374127	129.4	-0.2770283	129.4	-0.2431461	129.4	-0.233766	129.4	-0.2033525	129.4	-0.1664371	129.4	-0.1677533	129.4	-0.2114289
129.6	0.7384467	129.6	0.663337	129.6	0.7354509	129.6	0.7366533	129.6	0.7114658	129.6	0.7396601	129.6	0.7639047	129.6	-0.2488596	129.6	-0.2396921	129.6	-0.2741089	129.6	-0.2423983	129.6	-0.2390079	129.6	-0.202373	129.6	-0.1659251	129.6	-0.1721967	129.6	-0.2155806
129.8	0.7441932	129.8	0.6666139	129.8	0.7314883	129.8	0.738524	129.8	0.7104654	129.8	0.7418584	129.8	0.7639595	129.8	-0.2465331	129.8	-0.2398545	129.8	-0.2784117	129.8	-0.2387527	129.8	-0.2374012	129.8	-0.2082183	129.8	-0.1671455	129.8	-0.1744027	129.8	-0.212783
130	0.742844	130	0.6656969	130	0.7299603	130	0.7407748	130	0.7116933	130	0.7499707	130	0.7698339	130	-0.2446657	130	-0.2427594	130	-0.2725686	130	-0.2426906	130	-0.2321233	130	-0.2057017	130	-0.1694777	130	-0.1737619	130	-0.2104393
130.2	0.7533035	130.2	0.6667011	130.2	0.7338933	130.2	0.7405057	130.2	0.7123847	130.2	0.7452735	130.2	0.7730453	130.2	-0.2490333	130.2	-0.2371308	130.2	-0.2812582	130.2	-0.2404883	130.2	-0.2299569	130.2	-0.206227	130.2	-0.1682696	130.2	-0.1742764	130.2	-0.2171871
130.4	0.7475897	130.4	0.6698557	130.4	0.7372693	130.4	0.7459261	130.4	0.7187228	130.4	0.7482786	130.4	0.7718614	130.4	-0.2481175	130.4	-0.2385577	130.4	-0.2740928	130.4	-0.2418387	130.4	-0.2347792	130.4	-0.2056495	130.4	-0.1648794	130.4	-0.1722122	130.4	-0.2101232
130.6	0.7532671	130.6	0.6717222	130.6	0.7396381	130.6	0.7476052	130.6	0.7206706	130.6	0.7539492	130.6	0.7756835	130.6	-0.2419727	130.6	-0.2386686	130.6	-0.2746943	130.6	-0.2452907	130.6	-0.2313744	130.6	-0.2011165	130.6	-0.1657387	130.6	-0.168529	130.6	-0.2095446
130.8	0.754042	130.8	0.6734499	130.8	0.7445989	130.8	0.7489319	130.8	0.7244126	130.8	0.7538153	130.8	0.7771479	130.8	-0.2419984	130.8	-0.241524	130.8	-0.2772824	130.8	-0.2461558	130.8	-0.2311432	130.8	-0.200652	130.8	-0.1683057	130.8	-0.1660535	130.8	-0.2153719
131	0.7564976	131	0.6727251	131	0.745626	131	0.7505112	131	0.7266577	131	0.756257	131	0.781601	131	-0.2449688	131	-0.2414092	131	-0.2735065	131	-0.2371742	131	-0.2318026	131	-0.2013556	131	-0.1667394	131	-0.171764	131	-0.2065687
131.2	0.7572773	131.2	0.6803848	131.2	0.7477294	131.2	0.7543015	131.2	0.7212528	131.2	0.7588559	131.2	0.7825619	131.2	-0.2456656	131.2	-0.2422515	131.2	-0.2717275	131.2	-0.244541	131.2	-0.2346277	131.2	-0.2060063	131.2	-0.1691211	131.2	-0.1695094	131.2	-0.2075744
131.4	0.7596454	131.4	0.6842334	131.4	0.7496938	131.4	0.7556537	131.4	0.7257184	131.4	0.7597237	131.4	0.7833337	131.4	-0.2405489	131.4	-0.2388496	131.4	-0.2730901	131.4	-0.2372742	131.4	-0.2348373	131.4	-0.2050628	131.4	-0.167626	131.4	-0.1698875	131.4	-0.2130719
131.6	0.7612774	131.6	0.6834867	131.6	0.7499744	131.6	0.757872	131.6	0.7335398	131.6	0.7611696	131.6	0.7908601	131.6	-0.2427364	131.6	-0.2391738	131.6	-0.2695519	131.6	-0.2388104	131.6	-0.2347597	131.6	-0.2006089	131.6	-0.1660838	131.6	-0.1684314	131.6	-0.2101102
131.8	0.7606209	131.8	0.6823766	131.8	0.7529679	131.8	0.7596331	131.8	0.73124	131.8	0.7652707	131.8	0.7853314	131.8	-0.2473335	131.8	-0.2401397	131.8	-0.272872	131.8	-0.2393184	131.8	-0.2308451	131.8	-0.2027282	131.8	-0.1692565	131.8	-0.1650259	131.8	-0.2132511
132	0.7637807	132	0.6889625	132	0.7582808	132	0.7628275	132	0.7354311	132	0.7663718	132	0.7907656	132	-0.2449257	132	-0.2391659	132	-0.2696871	132	-0.2365205	132	-0.2336331	132	-0.1987664	132	-0.1597828	132	-0.1683192	132	-0.2116003
132.2	0.7695158	132.2	0.6896547	132.2	0.7520694	132.2	0.7622518	132.2	0.736523	132.2	0.771986	132.2	0.7905777	132.2	-0.2412789	132.2	-0.2353932	132.2	-0.2735032	132.2	-0.2415096	132.2	-0.228366	132.2	-0.2039203	132.2	-0.1655461	132.2	-0.1660089	132.2	-0.2110227
132.4	0.7717763	132.4	0.6950334	132.4	0.7622786	132.4	0.7615223	132.4	0.7336313	132.4	0.7676807	132.4	0.797493	132.4	-0.2414902	132.4	-0.2313777	132.4	-0.273245	132.4	-0.2396416	132.4	-0.230884	132.4	-0.1990303	132.4	-0.1634437	132.4	-0.1678917	132.4	-0.2090606
132.6	0.7721792	132.6	0.6891989	132.6	0.7644711	132.6	0.7680832	132.6	0.7370149	132.6	0.7731048	132.6	0.8027635	132.6	-0.2450718	132.6	-0.2360851	132.6	-0.2727152	132.6	-0.2369207	132.6	-0.2293389	132.6	-0.1995021	132.6	-0.1610459	132.6	-0.164892	132.6	-0.2099457
132.8	0.7723843	132.8	0.6987405	132.8	0.7597626	132.8	0.7708338	132.8	0.7468139	132.8	0.7745721	132.8	0.800734	132.8	-0.24553	132.8	-0.2404071	132.8	-0.2748609	132.8	-0.2378925	132.8	-0.2280863	132.8	-0.2019332	132.8	-0.1623215	132.8	-0.1647578	132.8	-0.2119049
133	0.7758783	133	0.6947408	133	0.7662345	133	0.7724039	133	0.7426515	133	0.7737523	133	0.7950576	133	-0.2475997	133	-0.2403275	133	-0.2732462	133	-0.2384852	133	-0.2269494	133	-0.2023153	133	-0.1625386	133	-0.167939	133	-0.207872
133.2	0.7780951	133.2	0.698891	133.2	0.7685276	133.2	0.7715337	133.2	0.7462071	133.2	0.7802187	133.2	0.8047062	133.2	-0.2411577	133.2	-0.2389661	133.2	-0.2705814	133.2	-0.2366705	133.2	-0.2277277	133.2	-0.1977264	133.2	-0.1595677	133.2	-0.1676809	133.2	-0.2118608
133.4	0.7788638	133.4	0.7004967	133.4	0.7655599	133.4	0.7724548	133.4	0.7487318	133.4	0.7825111	133.4	0.8026982	133.4	-0.2428202	133.4	-0.2373946	133.4	-0.2758645	133.4	-0.2395512	133.4	-0.2275174	133.4	-0.1990631	133.4	-0.1595649	133.4	-0.1684884	133.4	-0.208337
133.6	0.7790157	133.6	0.7028186	133.6	0.7700148	133.6	0.7777017	133.6	0.7523897	133.6	0.783724	133.6	0.8078442	133.6	-0.2405165	133.6	-0.2340578	133.6	-0.2707025	133.6	-0.2398132	133.6	-0.2305064	133.6	-0.2039959	133.6	-0.1619465	133.6	-0.1647518	133.6	-0.2084795
133.8	0.7830328	133.8	0.7050256	133.8	0.7707329	133.8	0.7832288	133.8	0.7535669	133.8	0.7828391	133.8	0.8064947	133.8	-0.244102	133.8	-0.2353499	133.8	-0.2655554	133.8	-0.2413	133.8	-0.2341774	133.8	-0.2001425	133.8	-0.1612742	133.8	-0.1680722	133.8	-0.2115419
134	0.7835831	134	0.7033943	134	0.7717336	134	0.7795134	134	0.7515405	134	0.7896236	134	0.8082845	134	-0.2410124	134	-0.234965	134	-0.2678376	134	-0.2387925	134	-0.2246432	134	-0.1974915	134	-0.1644624	134	-0.1615786	134	-0.2141173
134.2	0.7836541	134.2	0.7042589	134.2	0.7797113	134.2	0.7788597	134.2	0.7566152	134.2	0.7866647	134.2	0.8129228	134.2	-0.2357908	134.2	-0.2347438	134.2	-0.2680561	134.2	-0.2355687	134.2	-0.2294859	134.2	-0.1981976	134.2	-0.1640301	134.2	-0.165575	134.2	-0.2116058
134.4	0.789947	134.4	0.7134535	134.4	0.7779462	134.4	0.7832142	134.4	0.7603721	134.4	0.7888205	134.4	0.8152868	134.4	-0.2454061	134.4	-0.2379492	134.4	-0.2652282	134.4	-0.238517	134.4	-0.2250912	134.4	-0.1971004	134.4	-0.1583073	134.4	-0.1674882	134.4	-0.2130189
134.6	0.787769	134.6	0.7144295	134.6	0.7782882	134.6	0.7874987	134.6	0.7572275	134.6	0.7936317	134.6	0.8184484	134.6	-0.2415956	134.6	-0.2343893	134.6	-0.2694245	134.6	-0.2351532	134.6	-0.2294296	134.6	-0.2018634	134.6	-0.1604704	134.6	-0.1615464	134.6	-0.20776
134.8	0.7929934	134.8	0.7156861	134.8	0.7862916	134.8	0.7927095	134.8	0.7636628	134.8	0.7952152	134.8	0.8148232	134.8	-0.2420288	134.8	-0.2352504	134.8	-0.267003	134.8	-0.2362141	134.8	-0.2278906	134.8	-0.197925	134.8	-0.1607536	134.8	-0.1619683	134.8	-0.2074081
135	0.7905563	135	0.7185026	135	0.7873467	135	0.7904537	135	0.7618508	135	0.7939321	135	0.8160862	135	-0.2406366	135	-0.2361542	135	-0.2688791	135	-0.2361089	135	-0.2312594	135	-0.1983505	135	-0.1611046	135	-0.1653371	135	-0.2096079
135.2	0.7948456	135.2	0.719675	135.2	0.78843	135.2	0.7944299	135.2	0.765509	135.2	0.7949803	135.2	0.8216818	135.2	-0.2415991	135.2	-0.2335271	135.2	-0.2642662	135.2	-0.2371716	135.2	-0.2306168	135.2	-0.20092	135.2	-0.1603988	135.2	-0.1606743	135.2	-0.2070241
135.4	0.7992059	135.4	0.7198033	135.4	0.7886395	135.4	0.7899864	135.4	0.7675998	135.4	0.8012628	135.4	0.8173561	135.4	-0.2373042	135.4	-0.2361902	135.4	-0.2677828	135.4	-0.2355441	135.4	-0.2259644	135.4	-0.1970129	135.4	-0.1577629	135.4	-0.1659986	135.4	-0.2072236
135.6	0.797298	135.6	0.7195475	135.6	0.7913053	135.6	0.7978001	135.6	0.7700584	135.6	0.801901	135.6	0.822964	135.6	-0.2419081	135.6	-0.2314955	135.6	-0.2675509	135.6	-0.233868	135.6	-0.2256745	135.6	-0.2008178	135.6	-0.1621282	135.6	-0.1636444	135.6	-0.2109416
135.8	0.805312	135.8	0.7228227	135.8	0.7896402	135.8	0.7938281	135.8	0.7676277	135.8	0.8035433	135.8	0.8275869	135.8	-0.2414708	135.8	-0.232906	135.8	-0.2674984	135.8	-0.2335367	135.8	-0.2290375	135.8	-0.1979344	135.8	-0.1590815	135.8	-0.1651789	135.8	-0.2048716
136	0.808495	136	0.7235741	136	0.7941389	136	0.8031548	136	0.7705152	136	0.8081796	136	0.8243843	136	-0.2395094	136	-0.2286663	136	-0.2677628	136	-0.2407326	136	-0.2271464	136	-0.1930501	136	-0.1591159	136	-0.165774	136	-0.2061197
136.2	0.8070109	136.2	0.7284835	136.2	0.797533	136.2	0.8043824	136.2	0.7756386	136.2	0.8065276	136.2	0.832364	136.2	-0.2383353	136.2	-0.2311251	136.2	-0.2674083	136.2	-0.2358276	136.2	-0.2230895	136.2	-0.1952993	136.2	-0.1561402	136.2	-0.1627965	136.2	-0.2094755
136.4	0.8088216	136.4	0.7277524	136.4	0.7970598	136.4	0.8007845	136.4	0.7740165	136.4	0.8063511	136.4	0.8347469	136.4	-0.238053	136.4	-0.2325012	136.4	-0.264366	136.4	-0.2366919	136.4	-0.2253466	136.4	-0.1982701	136.4	-0.1584418	136.4	-0.1601148	136.4	-0.2095077
136.6	0.8067766	136.6	0.7299411	136.6	0.8012487	136.6	0.8053606	136.6	0.7777499	136.6	0.8114735	136.6	0.8333947	136.6	-0.2345409	136.6	-0.2304794	136.6	-0.2677773	136.6	-0.2322804	136.6	-0.2251177	136.6	-0.1930608	136.6	-0.158191	136.6	-0.1650802	136.6	-0.2086069
136.8	0.8133665	136.8	0.7355747	136.8	0.8048262	136.8	0.8066669	136.8	0.7827991	136.8	0.8127245	136.8	0.8385941	136.8	-0.2330459	136.8	-0.2313005	136.8	-0.2633833	136.8	-0.2348569	136.8	-0.2205454	136.8	-0.1946423	136.8	-0.1595011	136.8	-0.1631458	136.8	-0.2070069
137	0.8180695	137	0.7370057	137	0.8055257	137	0.8091424	137	0.7838123	137	0.8151304	137	0.8427486	137	-0.2343453	137	-0.2317664	137	-0.2640773	137	-0.2339192	137	-0.2244799	137	-0.1960798	137	-0.1579556	137	-0.1611459	137	-0.2085004
137.2	0.8158603	137.2	0.7357905	137.2	0.8019391	137.2	0.8110637	137.2	0.7843288	137.2	0.8138436	137.2	0.8423795	137.2	-0.2371169	137.2	-0.23641	137.2	-0.2630211	137.2	-0.2325845	137.2	-0.2250409	137.2	-0.1920167	137.2	-0.1590343	137.2	-0.1577358	137.2	-0.203225
137.4	0.8138208	137.4	0.739125	137.4	0.8048441	137.4	0.8140819	137.4	0.7886184	137.4	0.8177147	137.4	0.8413322	137.4	-0.2330277	137.4	-0.2263319	137.4	-0.2653197	137.4	-0.2382188	137.4	-0.2250487	137.4	-0.1951827	137.4	-0.1582007	137.4	-0.1616324	137.4	-0.2075632
137.6	0.8185278	137.6	0.7383076	137.6	0.8087624	137.6	0.8120002	137.6	0.7873877	137.6	0.8208165	137.6	0.8428108	137.6	-0.2377854	137.6	-0.2320142	137.6	-0.2617398	137.6	-0.2282679	137.6	-0.2269294	137.6	-0.1949624	137.6	-0.1551047	137.6	-0.1607275	137.6	-0.2026257
137.8	0.8208516	137.8	0.7383087	137.8	0.8143701	137.8	0.8209919	137.8	0.7882434	137.8	0.8187253	137.8	0.8466723	137.8	-0.2404505	137.8	-0.2283757	137.8	-0.2670409	137.8	-0.2278657	137.8	-0.2227914	137.8	-0.1941867	137.8	-0.1552436	137.8	-0.1571978	137.8	-0.2097063
138	0.8218294	138	0.7438363	138	0.8128805	138	0.8171329	138	0.7964917	138	0.8224387	138	0.8459773	138	-0.2370621	138	-0.2298584	138	-0.2591027	138	-0.2302099	138	-0.22436	138	-0.1909866	138	-0.1602854	138	-0.1604349	138	-0.1963604
138.2	0.8246905	138.2	0.7434791	138.2	0.8118854	138.2	0.8166094	138.2	0.7930389	138.2	0.8282604	138.2	0.8501324	138.2	-0.2364964	138.2	-0.2319016	138.2	-0.2616176	138.2	-0.2304474	138.2	-0.2242903	138.2	-0.1964062	138.2	-0.157005	138.2	-0.1600431	138.2	-0.2006752
138.4	0.8289725	138.4	0.7474428	138.4	0.8148838	138.4	0.817748	138.4	0.7889643	138.4	0.8255299	138.4	0.8549672	138.4	-0.2362718	138.4	-0.2309537	138.4	-0.2657857	138.4	-0.2315157	138.4	-0.2237872	138.4	-0.1892347	138.4	-0.1598457	138.4	-0.1620034	138.4	-0.2032189
138.6	0.830466	138.6	0.7457743	138.6	0.817106	138.6	0.8259527	138.6	0.7954296	138.6	0.8298442	138.6	0.8506089	138.6	-0.2336557	138.6	-0.2308702	138.6	-0.2650433	138.6	-0.2342883	138.6	-0.22207	138.6	-0.1928358	138.6	-0.1562487	138.6	-0.1595581	138.6	-0.2050373
138.8	0.8282636	138.8	0.7464755	138.8	0.8179909	138.8	0.8283712	138.8	0.7978252	138.8	0.8326905	138.8	0.849779	138.8	-0.236503	138.8	-0.226106	138.8	-0.2644164	138.8	-0.2293469	138.8	-0.2243328	138.8	-0.1921021	138.8	-0.1604146	138.8	-0.1611866	138.8	-0.2061305
139	0.8283318	139	0.7474326	139	0.8213578	139	0.8299684	139	0.7988722	139	0.8328363	139	0.8549467	139	-0.2403192	139	-0.2271194	139	-0.263986	139	-0.2317487	139	-0.2222092	139	-0.1910043	139	-0.1564864	139	-0.1596697	139	-0.2029019
139.2	0.8271911	139.2	0.7497056	139.2	0.8209485	139.2	0.8280959	139.2	0.8024099	139.2	0.8346641	139.2	0.8565956	139.2	-0.237992	139.2	-0.2266912	139.2	-0.2613815	139.2	-0.2270432	139.2	-0.2225927	139.2	-0.1927584	139.2	-0.1530322	139.2	-0.1568699	139.2	-0.2051431
139.4	0.8319611	139.4	0.7538793	139.4	0.823815	139.4	0.8268685	139.4	0.8058363	139.4	0.8372908	139.4	0.8591099	139.4	-0.2357018	139.4	-0.2272351	139.4	-0.2656749	139.4	-0.2286006	139.4	-0.2189891	139.4	-0.1955445	139.4	-0.1554466	139.4	-0.1568488	139.4	-0.2036392
139.6	0.8388834	139.6	0.7484928	139.6	0.8214657	139.6	0.8306459	139.6	0.8013093	139.6	0.8378701	139.6	0.8617275	139.6	-0.2388563	139.6	-0.2270328	139.6	-0.2594979	139.6	-0.2307771	139.6	-0.2230334	139.6	-0.1940672	139.6	-0.1562221	139.6	-0.1536209	139.6	-0.2056024
139.8	0.8369485	139.8	0.7589485	139.8	0.8243248	139.8	0.8307462	139.8	0.801275	139.8	0.840914	139.8	0.864437	139.8	-0.2379044	139.8	-0.2254386	139.8	-0.2621464	139.8	-0.2342309	139.8	-0.2229256	139.8	-0.1901399	139.8	-0.1524562	139.8	-0.1555614	139.8	-0.2019744
140	0.8395306	140	0.7632824	140	0.8283567	140	0.8334358	140	0.8080028	140	0.8417538	140	0.8611581	140	-0.2347461	140	-0.2266365	140	-0.2591287	140	-0.2295626	140	-0.221342	140	-0.1939698	140	-0.1526615	140	-0.1534888	140	-0.2048829
140.2	0.8394727	140.2	0.7613636	140.2	0.8308945	140.2	0.8379513	140.2	0.8069639	140.2	0.8430441	140.2	0.8617963	140.2	-0.2346761	140.2	-0.2277726	140.2	-0.2598325	140.2	-0.2289404	140.2	-0.2228961	140.2	-0.192534	140.2	-0.1590923	140.2	-0.1607463	140.2	-0.2005261
140.4	0.8389257	140.4	0.7595934	140.4	0.8303789	140.4	0.8399186	140.4	0.8132989	140.4	0.8446782	140.4	0.8690176	140.4	-0.237867	140.4	-0.2256822	140.4	-0.2604056	140.4	-0.2330668	140.4	-0.2176542	140.4	-0.1910137	140.4	-0.1547496	140.4	-0.1569665	140.4	-0.1982622
140.6	0.8399042	140.6	0.7647072	140.6	0.834126	140.6	0.8406394	140.6	0.8127125	140.6	0.8478077	140.6	0.8697301	140.6	-0.2364601	140.6	-0.2253705	140.6	-0.2587645	140.6	-0.2251031	140.6	-0.2221362	140.6	-0.1881521	140.6	-0.1550633	140.6	-0.1574776	140.6	-0.1993822
140.8	0.841993	140.8	0.7665874	140.8	0.8329598	140.8	0.8429329	140.8	0.8139768	140.8	0.8494509	140.8	0.8727559	140.8	-0.2334274	140.8	-0.2257659	140.8	-0.25983	140.8	-0.2292258	140.8	-0.2233807	140.8	-0.1863838	140.8	-0.1522356	140.8	-0.1535613	140.8	-0.2037738
141	0.8456624	141	0.7692571	141	0.8370233	141	0.8398622	141	0.8142396	141	0.8462203	141	0.8703187	141	-0.2360625	141	-0.2278103	141	-0.2607225	141	-0.2315769	141	-0.2206556	141	-0.1890133	141	-0.1540214	141	-0.1562064	141	-0.2022507
141.2	0.8470489	141.2	0.7670663	141.2	0.84158	141.2	0.8434436	141.2	0.8173906	141.2	0.8535784	141.2	0.8773623	141.2	-0.2290652	141.2	-0.2237733	141.2	-0.2569707	141.2	-0.2251972	141.2	-0.2192306	141.2	-0.1884245	141.2	-0.1531031	141.2	-0.1524417	141.2	-0.1949441
141.4	0.8522321	141.4	0.7728041	141.4	0.841279	141.4	0.8478958	141.4	0.8164523	141.4	0.8506164	141.4	0.8748558	141.4	-0.2346967	141.4	-0.2229068	141.4	-0.2633825	141.4	-0.2245386	141.4	-0.2179534	141.4	-0.189193	141.4	-0.1506594	141.4	-0.1504921	141.4	-0.2005848
141.6	0.8507255	141.6	0.7701902	141.6	0.8407885	141.6	0.8461757	141.6	0.8187099	141.6	0.8548688	141.6	0.8776748	141.6	-0.2368264	141.6	-0.2271439	141.6	-0.2566395	141.6	-0.225825	141.6	-0.2190433	141.6	-0.1910482	141.6	-0.1484201	141.6	-0.1577593	141.6	-0.203645
141.8	0.8497632	141.8	0.7739123	141.8	0.8438635	141.8	0.8465	141.8	0.8216731	141.8	0.8532358	141.8	0.8754489	141.8	-0.2350664	141.8	-0.2227235	141.8	-0.2564301	141.8	-0.2275085	141.8	-0.2166735	141.8	-0.1881769	141.8	-0.148865	141.8	-0.1510522	141.8	-0.2021855
142	0.8515454	142	0.7728017	142	0.844792	142	0.8511229	142	0.8231839	142	0.8560314	142	0.8761595	142	-0.2287578	142	-0.226552	142	-0.2555954	142	-0.2307037	142	-0.2196599	142	-0.1906694	142	-0.1518035	142	-0.157475	142	-0.1996438
142.2	0.8534324	142.2	0.7786382	142.2	0.8464661	142.2	0.8498155	142.2	0.8242625	142.2	0.859517	142.2	0.879827	142.2	-0.229731	142.2	-0.2238988	142.2	-0.2554629	142.2	-0.2277474	142.2	-0.214233	142.2	-0.1900072	142.2	-0.1510433	142.2	-0.1518451	142.2	-0.1986575
142.4	0.8627381	142.4	0.780423	142.4	0.8469645	142.4	0.8533494	142.4	0.8274894	142.4	0.8632561	142.4	0.8835086	142.4	-0.2335382	142.4	-0.2212365	142.4	-0.2531476	142.4	-0.2250145	142.4	-0.2152438	142.4	-0.1901429	142.4	-0.1472659	142.4	-0.1555883	142.4	-0.2007266
142.6	0.8584421	142.6	0.7829345	142.6	0.8510225	142.6	0.8555945	142.6	0.8250264	142.6	0.8623368	142.6	0.8877234	142.6	-0.2350387	142.6	-0.2221966	142.6	-0.2588361	142.6	-0.2267606	142.6	-0.2183484	142.6	-0.1905497	142.6	-0.1493602	142.6	-0.1526493	142.6	-0.1953006
142.8	0.857935	142.8	0.7807006	142.8	0.8557752	142.8	0.8553587	142.8	0.8319585	142.8	0.8640005	142.8	0.889007	142.8	-0.2329205	142.8	-0.219745	142.8	-0.2570392	142.8	-0.2281141	142.8	-0.2161873	142.8	-0.1853634	142.8	-0.1489907	142.8	-0.1488262	142.8	-0.2041632
143	0.8602606	143	0.7853858	143	0.8496463	143	0.8557894	143	0.8297575	143	0.8643849	143	0.8903887	143	-0.2313196	143	-0.2244096	143	-0.2571019	143	-0.2275313	143	-0.2163785	143	-0.1892883	143	-0.147841	143	-0.1539457	143	-0.1950645
143.2	0.8608544	143.2	0.7861808	143.2	0.8528659	143.2	0.8560742	143.2	0.8322299	143.2	0.8700207	143.2	0.8882128	143.2	-0.2312947	143.2	-0.224776	143.2	-0.2557323	143.2	-0.2278966	143.2	-0.2194324	143.2	-0.1859744	143.2	-0.1468929	143.2	-0.1497194	143.2	-0.1998163
143.4	0.864297	143.4	0.7826173	143.4	0.8497959	143.4	0.8608916	143.4	0.8318564	143.4	0.8710451	143.4	0.8918369	143.4	-0.2300893	143.4	-0.2229091	143.4	-0.2530156	143.4	-0.2220159	143.4	-0.2123171	143.4	-0.190231	143.4	-0.1463668	143.4	-0.1532065	143.4	-0.1941127
143.6	0.8672071	143.6	0.7891349	143.6	0.8517541	143.6	0.863297	143.6	0.8337336	143.6	0.8690815	143.6	0.8935203	143.6	-0.2314424	143.6	-0.224333	143.6	-0.2586122	143.6	-0.2221766	143.6	-0.2155647	143.6	-0.1870962	143.6	-0.1470392	143.6	-0.1525184	143.6	-0.2005253
143.8	0.8663132	143.8	0.7894537	143.8	0.858614	143.8	0.8649166	143.8	0.8384256	143.8	0.8701365	143.8	0.8952761	143.8	-0.227298	143.8	-0.2224349	143.8	-0.2571715	143.8	-0.2237021	143.8	-0.2206842	143.8	-0.1813394	143.8	-0.1482092	143.8	-0.1485813	143.8	-0.201951
144	0.8705059	144	0.7892211	144	0.8594758	144	0.8685138	144	0.8410619	144	0.8703356	144	0.8961906	144	-0.2311641	144	-0.2251217	144	-0.254993	144	-0.2249494	144	-0.211825	144	-0.1849776	144	-0.1467673	144	-0.1566048	144	-0.1963088
144.2	0.8717037	144.2	0.7893858	144.2	0.8633732	144.2	0.8671032	144.2	0.8396611	144.2	0.8713158	144.2	0.8996961	144.2	-0.2281783	144.2	-0.2199013	144.2	-0.25515	144.2	-0.2222899	144.2	-0.2142148	144.2	-0.1875368	144.2	-0.1462402	144.2	-0.1553935	144.2	-0.2031228
144.4	0.8712482	144.4	0.7922711	144.4	0.8672381	144.4	0.865662	144.4	0.841248	144.4	0.8765154	144.4	0.9006229	144.4	-0.2331787	144.4	-0.2254578	144.4	-0.2573164	144.4	-0.2244929	144.4	-0.2156811	144.4	-0.1852245	144.4	-0.1482297	144.4	-0.1519412	144.4	-0.1979025
144.6	0.8752859	144.6	0.7902261	144.6	0.8679725	144.6	0.8662702	144.6	0.841691	144.6	0.8807076	144.6	0.897445	144.6	-0.2293385	144.6	-0.2222967	144.6	-0.2549631	144.6	-0.22507	144.6	-0.2152883	144.6	-0.1791811	144.6	-0.1490765	144.6	-0.152428	144.6	-0.1935604
144.8	0.8737416	144.8	0.7932087	144.8	0.869496	144.8	0.8752022	144.8	0.8420254	144.8	0.8763559	144.8	0.8999435	144.8	-0.2289195	144.8	-0.2255194	144.8	-0.2579826	144.8	-0.2230425	144.8	-0.2139953	144.8	-0.1878985	144.8	-0.1462897	144.8	-0.1477827	144.8	-0.1966143
145	0.8743584	145	0.7942951	145	0.8695917	145	0.8698843	145	0.8452626	145	0.881916	145	0.8989713	145	-0.2299162	145	-0.2242345	145	-0.2542599	145	-0.2243174	145	-0.2112217	145	-0.1808419	145	-0.1525462	145	-0.1481628	145	-0.1972563
145.2	0.8810325	145.2	0.7962703	145.2	0.8732473	145.2	0.8707607	145.2	0.8461652	145.2	0.8843659	145.2	0.9012483	145.2	-0.2298842	145.2	-0.2191978	145.2	-0.254045	145.2	-0.2217082	145.2	-0.2154845	145.2	-0.1853009	145.2	-0.1467234	145.2	-0.1531732	145.2	-0.1956631
145.4	0.8761277	145.4	0.8006887	145.4	0.8751417	145.4	0.875175	145.4	0.8479322	145.4	0.882996	145.4	0.9063645	145.4	-0.2245534	145.4	-0.2238542	145.4	-0.2548876	145.4	-0.2215139	145.4	-0.2146224	145.4	-0.1851076	145.4	-0.1486243	145.4	-0.1505518	145.4	-0.1968068
145.6	0.8780462	145.6	0.8046544	145.6	0.8685242	145.6	0.8729613	145.6	0.8439399	145.6	0.8855111	145.6	0.912667	145.6	-0.2307978	145.6	-0.2210627	145.6	-0.2522854	145.6	-0.2232355	145.6	-0.213457	145.6	-0.1866319	145.6	-0.1460608	145.6	-0.1497172	145.6	-0.1999618
145.8	0.8815342	145.8	0.8030514	145.8	0.8722215	145.8	0.8736567	145.8	0.8508442	145.8	0.8858663	145.8	0.9102368	145.8	-0.2311578	145.8	-0.2231732	145.8	-0.253365	145.8	-0.2211292	145.8	-0.2083969	145.8	-0.1845661	145.8	-0.1411156	145.8	-0.1465282	145.8	-0.1936722
146	0.8794084	146	0.8071999	146	0.87141	146	0.8827705	146	0.8452135	146	0.8830613	146	0.9093485	146	-0.2310744	146	-0.2190848	146	-0.2512589	146	-0.2218221	146	-0.2152743	146	-0.1835111	146	-0.1511347	146	-0.1499961	146	-0.1986083
146.2	0.887372	146.2	0.8069389	146.2	0.8759338	146.2	0.8827837	146.2	0.8520588	146.2	0.8882437	146.2	0.9063751	146.2	-0.2270998	146.2	-0.2147159	146.2	-0.2549734	146.2	-0.2232833	146.2	-0.2113251	146.2	-0.1858674	146.2	-0.1431395	146.2	-0.1523126	146.2	-0.1968368
146.4	0.8848269	146.4	0.8056158	146.4	0.8745844	146.4	0.8801956	146.4	0.857177	146.4	0.8875865	146.4	0.914919	146.4	-0.2283202	146.42	-0.2190562	146.42	-0.2466892	146.42	-0.2176563	146.42	-0.2072453	146.42	-0.1849844	146.42	-0.1436387	146.42	-0.1522533	146.42	-0.1934696
146.6	0.8832978	146.6	0.8073047	146.6	0.881424	146.6	0.8860861	146.6	0.8561077	146.6	0.8942724	146.6	0.9164675	146.6	-0.2285074	146.6	-0.2176981	146.6	-0.2532969	146.6	-0.2189178	146.6	-0.2123667	146.6	-0.1870295	146.6	-0.1460386	146.6	-0.151843	146.6	-0.1931194
146.8	0.887299	146.8	0.8113987	146.8	0.8825488	146.8	0.8833818	146.8	0.8536625	146.8	0.8897969	146.8	0.9142467	146.8	-0.2267622	146.8	-0.2256609	146.8	-0.2484584	146.8	-0.2210197	146.8	-0.2095699	146.8	-0.1820344	146.8	-0.1486799	146.8	-0.1508904	146.8	-0.1952309
147	0.8874114	147	0.8104947	147	0.8835811	147	0.8892286	147	0.8596196	147	0.8940662	147	0.9197915	147	-0.2300555	147.01	-0.2140075	147.01	-0.2530721	147.01	-0.2227162	147.01	-0.2102104	147.01	-0.1823095	147.01	-0.1454113	147.01	-0.147238	147.01	-0.1974908
147.2	0.8882964	147.2	0.812317	147.2	0.8830918	147.2	0.8889385	147.2	0.8640863	147.2	0.8977382	147.2	0.9178597	147.2	-0.2298863	147.2	-0.217022	147.2	-0.2470073	147.2	-0.2229592	147.2	-0.2127049	147.2	-0.1813529	147.2	-0.1417082	147.2	-0.1478619	147.2	-0.1979467
147.41	0.8885135	147.41	0.8168742	147.41	0.8824683	147.41	0.8892666	147.41	0.8640555	147.41	0.8959034	147.41	0.9161066	147.41	-0.2252109	147.4	-0.2181308	147.4	-0.2532234	147.4	-0.2197879	147.4	-0.2087683	147.4	-0.184009	147.4	-0.1397389	147.4	-0.1537357	147.4	-0.1957019
147.6	0.8953866	147.6	0.8187617	147.6	0.88372	147.6	0.8929339	147.6	0.8644825	147.6	0.8971261	147.6	0.918273	147.6	-0.2295766	147.6	-0.2201856	147.6	-0.2518733	147.6	-0.2183148	147.6	-0.208455	147.6	-0.1786751	147.6	-0.1477058	147.6	-0.1472592	147.6	-0.1962058
147.8	0.8933431	147.8	0.8161033	147.8	0.893326	147.8	0.8933603	147.8	0.86467	147.8	0.8994343	147.8	0.9200255	147.8	-0.231411	147.8	-0.2174884	147.8	-0.248187	147.8	-0.2198223	147.8	-0.2105801	147.8	-0.1773722	147.8	-0.1424776	147.8	-0.146187	147.8	-0.1935433
148	0.8964954	148	0.8187821	148	0.8901013	148	0.8971425	148	0.8666185	148	0.9006285	148	0.9211213	148	-0.2284631	148	-0.2176334	148	-0.2534476	148	-0.2126707	148	-0.2074732	148	-0.1836113	148	-0.1479064	148	-0.1487144	148	-0.1941326
148.2	0.8937187	148.2	0.823288	148.2	0.8914728	148.2	0.8935316	148.2	0.8657272	148.2	0.9016938	148.2	0.9235796	148.2	-0.2249504	148.2	-0.2137888	148.2	-0.2493264	148.2	-0.2201605	148.2	-0.2104752	148.2	-0.1822193	148.2	-0.1454083	148.2	-0.1433117	148.2	-0.1953468
148.4	0.8965742	148.4	0.8227702	148.4	0.8913292	148.4	0.8992739	148.4	0.8717824	148.4	0.9069093	148.4	0.9231793	148.4	-0.2251782	148.4	-0.2176892	148.4	-0.2494237	148.4	-0.2183165	148.4	-0.2140247	148.4	-0.1792181	148.4	-0.1437416	148.4	-0.1482877	148.4	-0.200354
148.6	0.9029992	148.6	0.8205097	148.6	0.8938779	148.6	0.8968942	148.6	0.8663023	148.6	0.9078871	148.6	0.932096	148.6	-0.225577	148.6	-0.2169818	148.6	-0.2489514	148.6	-0.218851	148.6	-0.2062841	148.6	-0.1821133	148.6	-0.140645	148.6	-0.1485764	148.6	-0.1931045
148.8	0.9050711	148.8	0.8236664	148.8	0.8955912	148.8	0.9012511	148.8	0.8699636	148.8	0.9059972	148.8	0.932009	148.8	-0.2274167	148.8	-0.2199493	148.8	-0.2521581	148.8	-0.2166724	148.8	-0.208851	148.8	-0.1816006	148.8	-0.143277	148.8	-0.1425999	148.8	-0.1973486
149	0.9027877	149	0.8240373	149	0.8911846	149	0.9035862	149	0.8731701	149	0.9071625	149	0.931136	149	-0.2248994	149	-0.2148165	149	-0.2496987	149	-0.2220019	149	-0.2115582	149	-0.1801084	149	-0.1467394	149	-0.1483838	149	-0.1951712
149.2	0.9050552	149.2	0.8261575	149.2	0.8947249	149.2	0.9005469	149.2	0.8742041	149.2	0.9121039	149.2	0.9293587	149.2	-0.2238869	149.2	-0.2157689	149.2	-0.2475523	149.2	-0.2196552	149.2	-0.206845	149.2	-0.1768769	149.2	-0.1477978	149.2	-0.1483006	149.2	-0.1979296
149.4	0.9099344	149.4	0.8309941	149.4	0.8966196	149.4	0.9017058	149.4	0.8770049	149.4	0.9124643	149.4	0.9335647	149.4	-0.2229811	149.4	-0.2180936	149.4	-0.2495377	149.4	-0.2133055	149.4	-0.2103012	149.4	-0.1811598	149.4	-0.1394119	149.4	-0.1424695	149.4	-0.1925351
149.6	0.9103995	149.6	0.8327573	149.6	0.8978286	149.6	0.9026175	149.6	0.8807195	149.6	0.9147872	149.6	0.937965	149.6	-0.221945	149.6	-0.2150958	149.6	-0.2473581	149.6	-0.2172152	149.6	-0.2121997	149.6	-0.1826644	149.6	-0.1376324	149.6	-0.1446059	149.6	-0.1890947
149.81	0.9023607	149.81	0.831962	149.81	0.902169	149.81	0.9066615	149.81	0.8784105	149.81	0.9148837	149.81	0.9377709	149.81	-0.223746	149.8	-0.2152341	149.8	-0.2453976	149.8	-0.2171074	149.8	-0.2070299	149.8	-0.1781653	149.8	-0.140474	149.8	-0.1447593	149.8	-0.1915325
150	0.9110013	150	0.8332878	150	0.8988226	150	0.9083091	150	0.8810418	150	0.9190837	150	0.9366313	150	-0.2258965	150	-0.2142041	150	-0.2443871	150	-0.2212943	150	-0.2056356	150	-0.1798529	150	-0.1415928	150	-0.1439684	150	-0.1928877
150.2	0.9085028	150.2	0.8332764	150.2	0.9049507	150.2	0.9068903	150.2	0.876183	150.2	0.9164603	150.2	0.9348291	150.2	-0.2264401	150.2	-0.2135443	150.2	-0.2509344	150.2	-0.2142388	150.2	-0.2064192	150.2	-0.1788916	150.2	-0.1433898	150.2	-0.145887	150.2	-0.1921851
150.4	0.9117371	150.4	0.8335497	150.4	0.908601	150.4	0.9117948	150.4	0.8808575	150.4	0.9121876	150.4	0.9388957	150.4	-0.225112	150.4	-0.2127059	150.4	-0.2452919	150.4	-0.2188173	150.4	-0.2046261	150.4	-0.1790147	150.4	-0.1414876	150.4	-0.1471343	150.4	-0.19291
150.6	0.9128569	150.6	0.8350058	150.6	0.9056296	150.6	0.9116484	150.6	0.8785496	150.6	0.9231894	150.6	0.9428213	150.6	-0.2254508	150.6	-0.2187625	150.6	-0.2450287	150.6	-0.2150092	150.6	-0.2055571	150.6	-0.1818787	150.6	-0.1421667	150.6	-0.1417274	150.6	-0.1918006
150.8	0.9163299	150.8	0.838149	150.8	0.9043877	150.8	0.9143909	150.8	0.8837817	150.8	0.9239265	150.8	0.9428254	150.8	-0.2240191	150.8	-0.2154529	150.8	-0.2487071	150.8	-0.2183366	150.8	-0.2030703	150.8	-0.1794666	150.8	-0.1403616	150.8	-0.1456401	150.8	-0.1911064
151	0.9164739	151	0.8448888	151	0.9117929	151	0.9120583	151	0.8847796	151	0.9179927	151	0.9467482	151	-0.2242564	151	-0.212935	151	-0.2484362	151	-0.2125604	151	-0.2053747	151	-0.1746076	151	-0.139388	151	-0.1406194	151	-0.1869946
151.2	0.9181692	151.2	0.8430314	151.2	0.9118682	151.2	0.9160091	151.2	0.8882125	151.2	0.9213483	151.2	0.9470955	151.2	-0.2249698	151.2	-0.2162052	151.2	-0.2449488	151.2	-0.2182675	151.2	-0.2167105	151.2	-0.1778289	151.2	-0.1417031	151.2	-0.142458	151.2	-0.1898113
151.4	0.9197356	151.4	0.8399644	151.4	0.9111947	151.4	0.9202906	151.4	0.8908751	151.4	0.9223547	151.4	0.9471077	151.4	-0.2266825	151.4	-0.21309	151.4	-0.2460994	151.4	-0.2158463	151.4	-0.2063627	151.4	-0.1759418	151.4	-0.139822	151.4	-0.1438022	151.4	-0.188931
151.6	0.9161536	151.6	0.8399832	151.6	0.9091966	151.6	0.9119671	151.6	0.8912802	151.6	0.9244077	151.6	0.9500498	151.6	-0.2231151	151.6	-0.212584	151.6	-0.2472903	151.6	-0.2123798	151.6	-0.2087338	151.6	-0.1781542	151.6	-0.141008	151.6	-0.1450282	151.6	-0.1913317
151.8	0.9210319	151.8	0.8419824	151.8	0.9163214	151.8	0.9185959	151.8	0.8935011	151.8	0.9298558	151.8	0.9482561	151.8	-0.2287865	151.8	-0.2166266	151.8	-0.2441684	151.8	-0.2141182	151.8	-0.2048862	151.8	-0.1771049	151.8	-0.1413322	151.8	-0.1415586	151.8	-0.1904891
152	0.9231765	152	0.8437833	152	0.9158689	152	0.918704	152	0.8940679	152	0.9312306	152	0.951972	152	-0.2202283	152	-0.2127834	152	-0.24345	152	-0.2144319	152	-0.2049552	152	-0.1761196	152	-0.1370473	152	-0.1445098	152	-0.1896843
152.2	0.9233819	152.2	0.8487371	152.2	0.912448	152.2	0.9208254	152.2	0.8937948	152.2	0.9335839	152.2	0.9555152	152.2	-0.2244187	152.2	-0.2111939	152.2	-0.2433355	152.2	-0.2121237	152.2	-0.2061273	152.2	-0.1762308	152.2	-0.1349267	152.2	-0.1412702	152.2	-0.1915817
152.4	0.9213676	152.4	0.8483994	152.4	0.9176327	152.4	0.9224201	152.4	0.8964023	152.4	0.9307626	152.4	0.95415	152.4	-0.2219089	152.4	-0.2113795	152.4	-0.2488888	152.4	-0.2107566	152.4	-0.2062516	152.4	-0.1797807	152.4	-0.1385135	152.4	-0.1440559	152.4	-0.1930931
152.6	0.9270257	152.6	0.8490025	152.6	0.9194999	152.6	0.9211861	152.6	0.8956595	152.6	0.9310274	152.6	0.9536394	152.6	-0.2290688	152.6	-0.2126281	152.6	-0.2449861	152.6	-0.211233	152.6	-0.2044454	152.6	-0.176853	152.6	-0.1396916	152.6	-0.1429609	152.6	-0.1888006
152.8	0.9257005	152.8	0.8534663	152.8	0.9214181	152.8	0.9260455	152.8	0.8987946	152.8	0.9390267	152.8	0.9577967	152.8	-0.2239999	152.8	-0.2097138	152.8	-0.2414454	152.8	-0.2132391	152.8	-0.2066283	152.8	-0.1737389	152.8	-0.1328566	152.8	-0.1438926	152.8	-0.1859377
153	0.9278681	153	0.8530009	153	0.9233056	153	0.9310653	153	0.899505	153	0.9342258	153	0.9612069	153	-0.2182195	153	-0.2104549	153	-0.242115	153	-0.2149581	153	-0.2067353	153	-0.1777162	153	-0.1383955	153	-0.1421989	153	-0.1931764
153.2	0.9304839	153.2	0.8580204	153.2	0.9193577	153.2	0.9263574	153.2	0.9010886	153.2	0.937093	153.2	0.9625086	153.2	-0.2238785	153.2	-0.2109033	153.2	-0.2437608	153.2	-0.2146861	153.2	-0.2001874	153.2	-0.1787873	153.2	-0.1360715	153.2	-0.1371138	153.2	-0.1886639
153.4	0.9316557	153.4	0.8526976	153.4	0.9274743	153.4	0.9318705	153.4	0.9026068	153.4	0.9384887	153.4	0.9601576	153.4	-0.2194234	153.4	-0.2131183	153.4	-0.2439926	153.4	-0.214937	153.4	-0.2005982	153.4	-0.1798754	153.4	-0.1374045	153.4	-0.141312	153.4	-0.1879438
153.6	0.9319118	153.6	0.8584886	153.6	0.9256917	153.6	0.9292808	153.6	0.9032561	153.6	0.9372099	153.6	0.9649026	153.6	-0.2227266	153.6	-0.2103574	153.6	-0.2425534	153.6	-0.2121604	153.6	-0.2017922	153.6	-0.1806091	153.6	-0.1347779	153.6	-0.1459032	153.6	-0.1879044
153.8	0.9343159	153.8	0.8583679	153.8	0.9254013	153.8	0.9292949	153.8	0.9052992	153.8	0.9416484	153.8	0.9639885	153.8	-0.2265539	153.8	-0.2082004	153.8	-0.2444498	153.8	-0.215421	153.8	-0.2059736	153.8	-0.1790267	153.8	-0.1363604	153.8	-0.1380501	153.8	-0.1877864
154	0.9335436	154	0.8560992	154	0.9308116	154	0.9308668	154	0.9064787	154	0.938738	154	0.9604928	154	-0.2200511	154	-0.2087063	154	-0.2406013	154	-0.2105035	154	-0.1988898	154	-0.1728192	154	-0.1373659	154	-0.1393362	154	-0.1877316
154.2	0.9305456	154.2	0.8586414	154.2	0.9257596	154.2	0.9325128	154.2	0.9058104	154.2	0.9433199	154.2	0.9628913	154.2	-0.2224817	154.2	-0.2099295	154.2	-0.2428607	154.2	-0.2065742	154.2	-0.206153	154.2	-0.1750161	154.2	-0.1406499	154.2	-0.1419592	154.2	-0.189516
154.4	0.9353791	154.4	0.8550461	154.4	0.931349	154.4	0.9344684	154.4	0.9071431	154.4	0.9447066	154.4	0.9665153	154.4	-0.2231997	154.4	-0.2126976	154.4	-0.2430816	154.4	-0.2152996	154.4	-0.2024064	154.4	-0.1745521	154.4	-0.1382239	154.4	-0.1416596	154.4	-0.1876129
154.6	0.9329891	154.6	0.8612105	154.6	0.9307078	154.6	0.9340455	154.6	0.9086283	154.6	0.9423479	154.6	0.9688337	154.6	-0.2198228	154.6	-0.2121129	154.6	-0.2403223	154.6	-0.2101937	154.6	-0.2020442	154.6	-0.1735239	154.6	-0.1340332	154.6	-0.1425463	154.6	-0.1902487
154.8	0.9397196	154.8	0.859989	154.8	0.9286809	154.8	0.9346874	154.8	0.9124194	154.8	0.9434132	154.8	0.9681888	154.8	-0.2228659	154.8	-0.2053322	154.8	-0.2387208	154.8	-0.2135294	154.8	-0.1991795	154.8	-0.1753627	154.8	-0.1374696	154.8	-0.1404463	154.8	-0.1858019
155	0.940498	155	0.8660354	155	0.9302772	155	0.9389337	155	0.9095309	155	0.9478113	155	0.9737293	155	-0.223683	155	-0.2116257	155	-0.2453399	155	-0.2118131	155	-0.2021668	155	-0.1775947	155	-0.1354434	155	-0.1376627	155	-0.191215
155.2	0.9400976	155.2	0.8575591	155.2	0.9354789	155.2	0.9385426	155.2	0.9128717	155.2	0.9475867	155.2	0.9742249	155.2	-0.2218686	155.2	-0.206791	155.2	-0.243581	155.2	-0.2137624	155.2	-0.1998681	155.2	-0.1791632	155.2	-0.1320703	155.2	-0.1364046	155.2	-0.1881443
155.4	0.9377492	155.4	0.8623107	155.4	0.9371282	155.4	0.9438677	155.4	0.9146799	155.4	0.9513971	155.4	0.9731749	155.4	-0.2213948	155.4	-0.2092156	155.4	-0.240308	155.4	-0.2108554	155.4	-0.2033506	155.4	-0.1736147	155.4	-0.135998	155.4	-0.1381491	155.4	-0.1891962
155.6	0.9440681	155.6	0.8687413	155.6	0.9372612	155.6	0.9391695	155.6	0.91422	155.6	0.954012	155.6	0.9682916	155.6	-0.2219538	155.6	-0.2042159	155.6	-0.2414749	155.6	-0.2105148	155.6	-0.2022558	155.6	-0.1742165	155.6	-0.1345364	155.6	-0.138355	155.6	-0.185678
155.8	0.9415768	155.8	0.865265	155.8	0.9378642	155.8	0.945167	155.8	0.9184197	155.8	0.9522101	155.8	0.9684154	155.8	-0.2198895	155.8	-0.2106101	155.8	-0.2459233	155.8	-0.2085126	155.8	-0.2028007	155.8	-0.174585	155.8	-0.1326149	155.8	-0.137183	155.8	-0.1861534
156	0.9442662	156	0.8661481	156	0.9418923	156	0.9442622	156	0.912505	156	0.9500027	156	0.9695014	156	-0.2166244	156	-0.2081245	156	-0.242625	156	-0.2088331	156	-0.2034333	156	-0.1718308	156	-0.1325452	156	-0.1348185	156	-0.1891671
156.2	0.9515502	156.2	0.8728462	156.2	0.9453984	156.2	0.9440066	156.2	0.9159824	156.2	0.9550017	156.2	0.9745442	156.2	-0.222457	156.2	-0.2071975	156.2	-0.2397794	156.2	-0.2124591	156.2	-0.2041239	156.2	-0.1741393	156.2	-0.1332032	156.2	-0.1324487	156.2	-0.1824469
156.4	0.944905	156.4	0.8662323	156.4	0.9426118	156.4	0.9475242	156.4	0.918004	156.4	0.9588621	156.4	0.9763754	156.4	-0.2226436	156.4	-0.2066342	156.4	-0.2395473	156.4	-0.2096911	156.4	-0.2022036	156.4	-0.1701112	156.4	-0.1309426	156.4	-0.1325887	156.4	-0.1891349
156.6	0.9539955	156.6	0.8712902	156.6	0.9461203	156.6	0.9479023	156.6	0.9218014	156.6	0.9558221	156.6	0.9791162	156.6	-0.2166777	156.6	-0.2117772	156.6	-0.2396721	156.6	-0.2137934	156.6	-0.2046966	156.6	-0.1756159	156.6	-0.1340699	156.6	-0.1317613	156.6	-0.188332
156.8	0.9458162	156.8	0.8748772	156.8	0.9468575	156.8	0.9504373	156.8	0.923735	156.8	0.9575537	156.8	0.9881812	156.8	-0.2165052	156.8	-0.2070682	156.8	-0.2353388	156.8	-0.2101462	156.8	-0.2006999	156.8	-0.167714	156.8	-0.136539	156.8	-0.138549	156.8	-0.1896167
157	0.9502791	157	0.8764254	157	0.9463172	157	0.9546344	157	0.9225585	157	0.9606459	157	0.986773	157	-0.2153167	157	-0.2041555	157	-0.2406385	157	-0.2116406	157	-0.2006928	157	-0.1716733	157	-0.1380864	157	-0.1347782	157	-0.1832677
157.2	0.9521331	157.2	0.8801236	157.2	0.9489376	157.2	0.9520217	157.2	0.9273639	157.2	0.9602612	157.2	0.9834455	157.2	-0.2197202	157.2	-0.207413	157.2	-0.2422935	157.2	-0.2060895	157.2	-0.1987555	157.2	-0.1725805	157.2	-0.1304385	157.2	-0.1356198	157.2	-0.1906807
157.4	0.9556661	157.4	0.8776464	157.4	0.9441151	157.4	0.9493061	157.4	0.9270898	157.4	0.9631158	157.4	0.9851037	157.4	-0.2214252	157.4	-0.2051694	157.4	-0.2411209	157.4	-0.2084392	157.4	-0.1989592	157.4	-0.1679111	157.4	-0.1354908	157.4	-0.1368853	157.4	-0.1876948
157.6	0.9561732	157.6	0.8779765	157.6	0.9468548	157.6	0.9507478	157.6	0.9272345	157.6	0.9603187	157.6	0.9830445	157.6	-0.2212552	157.6	-0.2075019	157.6	-0.2403349	157.6	-0.211756	157.6	-0.2022953	157.6	-0.169542	157.6	-0.1325302	157.6	-0.1358742	157.6	-0.1840408
157.8	0.953844	157.8	0.8810716	157.8	0.9519374	157.8	0.9551016	157.8	0.9300453	157.8	0.9648774	157.8	0.987772	157.8	-0.2136574	157.8	-0.2057204	157.8	-0.2395501	157.8	-0.2089744	157.8	-0.1967708	157.8	-0.1717901	157.8	-0.1329859	157.8	-0.1371244	157.8	-0.1851743
158	0.9589458	158	0.8822815	158	0.9504029	158	0.9568191	158	0.9264871	158	0.96181	158	0.9909977	158	-0.2106546	158	-0.2038376	158	-0.2399589	158	-0.2111343	158	-0.2019202	158	-0.1697189	158	-0.1294455	158	-0.1381952	158	-0.1781808
158.2	0.9557369	158.2	0.8780644	158.2	0.9518511	158.2	0.9532213	158.2	0.9323688	158.2	0.9683133	158.2	0.9896339	158.2	-0.2161306	158.2	-0.2042819	158.2	-0.2408948	158.2	-0.2032746	158.2	-0.1990322	158.2	-0.1656272	158.2	-0.1306005	158.2	-0.136667	158.2	-0.1820501
158.4	0.9597794	158.4	0.8846662	158.4	0.9551418	158.4	0.9568768	158.4	0.9326432	158.4	0.963393	158.4	0.9924137	158.4	-0.2157141	158.4	-0.2045129	158.4	-0.2347177	158.4	-0.2086694	158.4	-0.2035061	158.4	-0.1714316	158.4	-0.131493	158.4	-0.1343889	158.4	-0.1840188
158.6	0.9610727	158.6	0.8847453	158.6	0.9558595	158.6	0.9624926	158.6	0.9347557	158.6	0.9682031	158.6	0.9891961	158.6	-0.2133399	158.6	-0.2082595	158.6	-0.2332475	158.6	-0.2064802	158.6	-0.1990273	158.6	-0.1700114	158.6	-0.1348061	158.6	-0.1310861	158.6	-0.1840167
158.8	0.9631408	158.8	0.8868018	158.8	0.9585337	158.8	0.9611554	158.8	0.9338835	158.8	0.9689087	158.8	0.9912606	158.8	-0.2243052	158.8	-0.2067158	158.8	-0.2340592	158.8	-0.2085407	158.8	-0.1959276	158.8	-0.1661323	158.8	-0.1302485	158.8	-0.1304951	158.8	-0.1843436
159	0.9564054	159	0.8841566	159	0.9571348	159	0.9636626	159	0.9336551	159	0.9696226	159	0.9912961	159	-0.2110853	159	-0.2026794	159	-0.2378554	159	-0.2067827	159	-0.1974009	159	-0.1721953	159	-0.1273825	159	-0.1317699	159	-0.1808058
159.2	0.9653416	159.2	0.8879866	159.2	0.9630969	159.2	0.9639705	159.2	0.9319197	159.2	0.9699274	159.2	0.9944138	159.2	-0.2194552	159.2	-0.2016098	159.2	-0.2403729	159.2	-0.2066654	159.2	-0.1972032	159.2	-0.1695661	159.2	-0.1330655	159.2	-0.1331222	159.2	-0.1805364
159.4	0.961741	159.4	0.8900479	159.4	0.9616403	159.4	0.9660007	159.4	0.9362137	159.4	0.9726818	159.4	0.9988421	159.4	-0.2152084	159.4	-0.203945	159.4	-0.2356458	159.4	-0.209242	159.4	-0.1964409	159.4	-0.1707131	159.4	-0.1329729	159.4	-0.1340157	159.4	-0.1818131
159.6	0.96482	159.6	0.8924353	159.6	0.9601327	159.6	0.9694318	159.6	0.9385713	159.6	0.9770656	159.6	0.9959956	159.6	-0.2169787	159.6	-0.2081341	159.6	-0.2359745	159.6	-0.2013258	159.6	-0.2013144	159.6	-0.169115	159.6	-0.1271479	159.6	-0.1371742	159.6	-0.1874144
159.8	0.9689785	159.8	0.8892978	159.8	0.9647229	159.8	0.9687447	159.8	0.9371709	159.8	0.9732465	159.8	0.9998536	159.8	-0.2157809	159.8	-0.2037951	159.8	-0.2355471	159.8	-0.2051541	159.8	-0.1970805	159.8	-0.1669092	159.8	-0.1275372	159.8	-0.1387468	159.8	-0.1864341
160	0.9703009	160	0.89407	160	0.9656474	160	0.964956	160	0.940656	160	0.974526	160	0.9963858	160	-0.2178222	160	-0.1993907	160	-0.2339643	160	-0.2078451	160	-0.1984266	160	-0.1668069	160	-0.1306812	160	-0.1305588	160	-0.1894483
160.2	0.9706275	160.2	0.894864	160.2	0.9627587	160.2	0.9669149	160.2	0.9453731	160.2	0.9724746	160.2	0.9998963	160.2	-0.2151845	160.2	-0.2024333	160.2	-0.2313605	160.2	-0.2071807	160.2	-0.1975024	160.2	-0.1756143	160.2	-0.1282168	160.2	-0.1347686	160.2	-0.1813277
160.4	0.9713919	160.4	0.8952897	160.4	0.9644709	160.4	0.9677998	160.4	0.9399706	160.4	0.9812647	160.4	0.9998695	160.4	-0.2150296	160.4	-0.2077781	160.4	-0.2354688	160.4	-0.2059912	160.4	-0.2001016	160.4	-0.1692689	160.4	-0.1268185	160.4	-0.1315128	160.4	-0.1852893
160.6	0.9723951	160.6	0.8964875	160.6	0.9695891	160.6	0.9699474	160.6	0.9401955	160.6	0.9834703	160.6	1.004956	160.6	-0.2128024	160.6	-0.2024502	160.6	-0.2349977	160.6	-0.2046753	160.6	-0.1995966	160.6	-0.1709065	160.6	-0.1324008	160.6	-0.1306448	160.6	-0.1841491
160.8	0.9716474	160.8	0.9003015	160.8	0.9676595	160.8	0.9720347	160.8	0.9464124	160.8	0.9741904	160.8	1.008798	160.8	-0.2148368	160.8	-0.2026094	160.8	-0.233431	160.8	-0.2049408	160.8	-0.195485	160.8	-0.1665656	160.8	-0.1263625	160.8	-0.1378403	160.8	-0.179686
161	0.9716149	161	0.9003277	161	0.97031	161	0.9722676	161	0.9459143	161	0.9859387	161	1.009375	161	-0.2148021	161	-0.2016228	161	-0.2341275	161	-0.2029698	161	-0.1937633	161	-0.162809	161	-0.1277173	161	-0.1319901	161	-0.1840747
161.2	0.9762764	161.2	0.8953315	161.2	0.9715636	161.2	0.9728718	161.2	0.9469371	161.2	0.989932	161.2	1.005687	161.2	-0.2126233	161.2	-0.2018183	161.2	-0.2311407	161.2	-0.2010513	161.2	-0.2010918	161.2	-0.163845	161.2	-0.1299821	161.2	-0.1328066	161.2	-0.1743446
161.4	0.9760777	161.4	0.9022104	161.4	0.9720109	161.4	0.9708558	161.4	0.9458787	161.4	0.980937	161.4	1.012364	161.4	-0.2129931	161.4	-0.202308	161.4	-0.2302469	161.4	-0.1979699	161.4	-0.1967635	161.4	-0.1641016	161.4	-0.1254924	161.4	-0.1313579	161.4	-0.1824475
161.6	0.9767583	161.6	0.8985023	161.6	0.9739555	161.6	0.9737232	161.6	0.9535013	161.6	0.9845468	161.6	1.010891	161.6	-0.2141619	161.6	-0.2030174	161.6	-0.2364206	161.6	-0.2000582	161.6	-0.1941121	161.6	-0.1654602	161.6	-0.1308177	161.6	-0.1321188	161.6	-0.1843949
161.8	0.9766377	161.8	0.9000058	161.8	0.974498	161.8	0.9776188	161.8	0.9513628	161.8	0.983259	161.8	1.010378	161.8	-0.2133988	161.8	-0.2026199	161.8	-0.2343982	161.8	-0.2040649	161.8	-0.1945088	161.8	-0.1643043	161.8	-0.1266829	161.8	-0.1323113	161.8	-0.1825257
162	0.9781328	162	0.9012323	162	0.9763643	162	0.9750467	162	0.9520187	162	0.9862154	162	1.013301	162	-0.2126511	162	-0.200286	162	-0.2336954	162	-0.2083376	162	-0.1990074	162	-0.1648786	162	-0.1276129	162	-0.1305209	162	-0.1803823
162.2	0.9823822	162.2	0.902934	162.2	0.9777085	162.2	0.9835156	162.2	0.950743	162.2	0.9844096	162.2	1.011454	162.2	-0.2081501	162.2	-0.1985748	162.2	-0.2338993	162.2	-0.204788	162.2	-0.1940759	162.2	-0.1668374	162.2	-0.1311555	162.2	-0.1303604	162.2	-0.1810436
162.4	0.9806404	162.4	0.9081157	162.4	0.9740158	162.4	0.9830693	162.4	0.9534591	162.4	0.9887654	162.4	1.012332	162.4	-0.2137184	162.4	-0.1990713	162.4	-0.2315183	162.4	-0.2047744	162.4	-0.1936629	162.4	-0.1631525	162.4	-0.1297303	162.4	-0.1308577	162.4	-0.1789672
162.6	0.9879132	162.6	0.9089577	162.6	0.9762903	162.6	0.9834111	162.6	0.9576903	162.6	0.9891635	162.6	1.012643	162.6	-0.211428	162.6	-0.2023116	162.6	-0.2347785	162.6	-0.2019183	162.6	-0.1932198	162.6	-0.1673181	162.6	-0.1251397	162.6	-0.1319993	162.6	-0.1782252
162.8	0.9846207	162.8	0.9068178	162.8	0.9807618	162.8	0.980217	162.8	0.9609327	162.8	0.9938526	162.8	1.017122	162.8	-0.2147942	162.8	-0.2015996	162.8	-0.2328641	162.8	-0.1990473	162.8	-0.1955629	162.8	-0.1687912	162.8	-0.1287157	162.8	-0.1324496	162.8	-0.1814701
163	0.9868839	163	0.9063051	163	0.9817705	163	0.982422	163	0.9546038	163	0.9944348	163	1.019528	163	-0.2146742	163	-0.2044349	163	-0.2301306	163	-0.2021356	163	-0.1938437	163	-0.1644571	163	-0.1262124	163	-0.1304772	163	-0.1798311
163.2	0.9846801	163.2	0.9082069	163.2	0.9806544	163.2	0.9899132	163.2	0.9555439	163.2	0.9947447	163.2	1.019342	163.2	-0.2120241	163.2	-0.203944	163.2	-0.2310717	163.2	-0.2005613	163.2	-0.1969929	163.2	-0.1607422	163.2	-0.1267434	163.2	-0.1289798	163.2	-0.17899
163.4	0.9805337	163.4	0.9167835	163.4	0.9859481	163.4	0.9854989	163.4	0.9603048	163.4	0.9945108	163.4	1.0208	163.4	-0.2129201	163.4	-0.1978101	163.4	-0.2339295	163.4	-0.2009739	163.4	-0.1888654	163.4	-0.1625353	163.4	-0.1274824	163.4	-0.1334606	163.4	-0.1820183
163.6	0.9876885	163.6	0.9129711	163.6	0.9835982	163.6	0.9908723	163.6	0.9606525	163.6	0.9961047	163.6	1.022344	163.6	-0.2121369	163.6	-0.1997105	163.6	-0.2281939	163.6	-0.1987001	163.6	-0.1910665	163.6	-0.1572928	163.6	-0.12751	163.6	-0.1287794	163.6	-0.1813654
163.8	0.9909461	163.8	0.9103184	163.8	0.9929228	163.8	0.9892459	163.8	0.9640214	163.8	0.9960763	163.8	1.022361	163.8	-0.21701	163.8	-0.1974729	163.8	-0.2340041	163.8	-0.2005823	163.8	-0.1927341	163.8	-0.1669835	163.8	-0.1246057	163.8	-0.1306763	163.8	-0.1769024
164	0.9906465	164	0.9153349	164	0.9845999	164	0.9914874	164	0.9679027	164	1.001401	164	1.025629	164	-0.2096131	164	-0.1942091	164	-0.2338134	164	-0.2030068	164	-0.1917307	164	-0.1625018	164	-0.1272577	164	-0.1295308	164	-0.1820519
164.2	0.9913149	164.2	0.913823	164.2	0.9859887	164.2	0.9884248	164.2	0.9656736	164.2	0.9939682	164.2	1.023002	164.2	-0.2103127	164.2	-0.1978415	164.2	-0.2325027	164.2	-0.1997538	164.2	-0.1954555	164.2	-0.160215	164.2	-0.1239333	164.2	-0.1261755	164.2	-0.1741228
164.4	0.9912202	164.4	0.9178613	164.4	0.9889917	164.4	0.9931041	164.4	0.9671878	164.4	1.003093	164.4	1.022173	164.4	-0.2065565	164.4	-0.1998249	164.4	-0.2261129	164.4	-0.2016088	164.4	-0.1936585	164.4	-0.1637258	164.4	-0.1221887	164.4	-0.1312759	164.4	-0.1802239
164.6	0.9956113	164.6	0.9180566	164.6	0.9887769	164.6	0.99042	164.6	0.9682384	164.6	1.003009	164.6	1.026694	164.6	-0.2067838	164.62	-0.2023431	164.62	-0.2333429	164.62	-0.196231	164.62	-0.1909749	164.62	-0.1620412	164.62	-0.1225848	164.62	-0.127614	164.62	-0.1816091
164.8	0.9892207	164.8	0.9201844	164.8	0.9863965	164.8	0.9962844	164.8	0.9662009	164.8	1.002666	164.8	1.027478	164.8	-0.2069386	164.8	-0.2000998	164.8	-0.2289468	164.8	-0.2000276	164.8	-0.1889095	164.8	-0.1672111	164.8	-0.1253189	164.8	-0.1282392	164.8	-0.1805943
165	0.9945119	165	0.9214817	165	0.9900115	165	0.9913893	165	0.9671517	165	1.003182	165	1.024649	165	-0.2165466	165	-0.1935681	165	-0.2347078	165	-0.1954597	165	-0.1918911	165	-0.1596	165	-0.1244618	165	-0.126182	165	-0.1799729
165.2	1.001316	165.2	0.924368	165.2	0.9958644	165.2	0.9940698	165.2	0.9632003	165.2	1.004351	165.2	1.029291	165.2	-0.2087443	165.2	-0.1966845	165.2	-0.231516	165.2	-0.2018331	165.2	-0.1930791	165.2	-0.1658111	165.2	-0.1249136	165.2	-0.1265749	165.2	-0.1789836
165.4	0.9973637	165.4	0.9209332	165.4	0.9976295	165.4	0.9975473	165.4	0.967681	165.4	1.004658	165.4	1.029587	165.4	-0.2089592	165.4	-0.1968363	165.4	-0.2249742	165.4	-0.1961302	165.4	-0.1863624	165.4	-0.1623254	165.4	-0.1240828	165.4	-0.1255251	165.4	-0.1758425
165.6	0.9975388	165.6	0.9213567	165.6	0.9894301	165.6	0.9940318	165.6	0.9729688	165.6	1.003223	165.6	1.031074	165.6	-0.2111	165.6	-0.1978592	165.6	-0.2281855	165.6	-0.1987413	165.6	-0.1907407	165.6	-0.1620918	165.6	-0.1220805	165.6	-0.124727	165.6	-0.176639
165.8	1.002571	165.8	0.9267105	165.8	0.9875939	165.8	0.9962615	165.8	0.9710795	165.8	1.006691	165.8	1.035968	165.8	-0.2098814	165.8	-0.1926989	165.8	-0.2292631	165.8	-0.2011361	165.8	-0.1921153	165.8	-0.1598506	165.8	-0.1250674	165.8	-0.1269688	165.8	-0.1761346
166	1.00002	166	0.9217693	166	0.9938951	166	0.9989432	166	0.9683013	166	1.008687	166	1.034075	166	-0.2082063	166	-0.1969974	166	-0.2271009	166	-0.1934708	166	-0.1902256	166	-0.1567752	166	-0.1202273	166	-0.1307536	166	-0.180699
166.2	0.9968978	166.2	0.9237698	166.2	0.9924055	166.2	1.002284	166.2	0.9751368	166.2	1.007811	166.2	1.034749	166.2	-0.2058304	166.2	-0.2008396	166.2	-0.2307587	166.2	-0.1983679	166.2	-0.1908388	166.2	-0.1622944	166.2	-0.1229199	166.2	-0.1225352	166.2	-0.1794452
166.4	1.000444	166.4	0.9255653	166.4	0.9956574	166.4	1.004216	166.4	0.9795417	166.4	1.011186	166.4	1.038947	166.4	-0.2096852	166.4	-0.1977235	166.4	-0.2252606	166.4	-0.1957982	166.4	-0.1864306	166.4	-0.1598017	166.4	-0.1238223	166.4	-0.1300814	166.4	-0.1761878
166.6	1.005979	166.6	0.9281889	166.6	0.9973738	166.6	0.9991375	166.6	0.9723437	166.6	1.008675	166.6	1.035485	166.6	-0.2104129	166.6	-0.1957845	166.6	-0.2258863	166.6	-0.1967768	166.6	-0.1883559	166.6	-0.1630282	166.6	-0.1228571	166.6	-0.1267759	166.6	-0.1788945
166.8	0.9992642	166.8	0.9291999	166.8	0.9981943	166.8	1.005562	166.8	0.9756672	166.8	1.010847	166.8	1.037516	166.8	-0.2093052	166.8	-0.2004936	166.8	-0.2315802	166.8	-0.1966717	166.8	-0.1880406	166.8	-0.160972	166.8	-0.1187347	166.8	-0.1259637	166.8	-0.1769256
167	1.006991	167	0.931548	167	1.002335	167	1.003995	167	0.9782188	167	1.012899	167	1.037305	167	-0.2041873	167	-0.1930022	167	-0.2273939	167	-0.1980719	167	-0.1899184	167	-0.162191	167	-0.1200575	167	-0.1214999	167	-0.1743734
167.2	1.001059	167.2	0.9302874	167.2	0.9966585	167.2	1.007307	167.2	0.9818398	167.2	1.015167	167.2	1.044066	167.2	-0.2090178	167.2	-0.195018	167.2	-0.2267605	167.2	-0.1936796	167.2	-0.1852246	167.2	-0.1607326	167.2	-0.120765	167.2	-0.1220226	167.2	-0.1765423
167.4	1.006917	167.4	0.9281294	167.4	1.004525	167.4	1.005537	167.4	0.9825029	167.4	1.015135	167.4	1.041523	167.4	-0.2061546	167.4	-0.1929346	167.4	-0.2265416	167.4	-0.192209	167.4	-0.1922512	167.4	-0.1586951	167.4	-0.1172435	167.4	-0.1242327	167.4	-0.1768371
167.6	1.00532	167.6	0.9340211	167.6	1.004903	167.6	1.000514	167.6	0.9799979	167.6	1.015373	167.6	1.037904	167.6	-0.2071085	167.6	-0.1947848	167.6	-0.2258027	167.6	-0.1934277	167.6	-0.1866103	167.6	-0.1576606	167.6	-0.1232254	167.6	-0.124658	167.6	-0.17569
167.8	1.007244	167.8	0.9323017	167.8	1.003187	167.8	1.00611	167.8	0.9837057	167.8	1.019048	167.8	1.041434	167.8	-0.2094942	167.8	-0.193979	167.8	-0.2208298	167.8	-0.1998279	167.8	-0.188601	167.8	-0.1615069	167.8	-0.1185325	167.8	-0.1259914	167.8	-0.1789788
168	1.007045	168	0.9305593	168	1.00532	168	1.006445	168	0.9765814	168	1.015921	168	1.040169	168	-0.2112846	168	-0.1927613	168	-0.2276561	168	-0.1942232	168	-0.1876504	168	-0.1598729	168	-0.12013	168	-0.121213	168	-0.1791604
168.2	1.010857	168.2	0.9380569	168.2	1.005071	168.2	1.010584	168.2	0.9816821	168.2	1.020052	168.2	1.038999	168.2	-0.2087342	168.2	-0.1965508	168.2	-0.2245894	168.2	-0.1962696	168.2	-0.1898014	168.2	-0.1531474	168.2	-0.1200545	168.2	-0.1263106	168.2	-0.1777928
168.4	1.011718	168.4	0.9315826	168.4	1.011128	168.4	1.01429	168.4	0.9829021	168.4	1.014706	168.4	1.043941	168.4	-0.2086994	168.4	-0.1936083	168.4	-0.2216351	168.4	-0.1957875	168.4	-0.1881033	168.4	-0.1612868	168.4	-0.12204	168.4	-0.1215937	168.4	-0.1771203
168.6	1.010529	168.6	0.9379498	168.6	1.009442	168.6	1.011081	168.6	0.9852549	168.6	1.021335	168.6	1.048953	168.6	-0.2035269	168.6	-0.1947105	168.6	-0.2244234	168.6	-0.1961092	168.6	-0.1886164	168.6	-0.16274	168.6	-0.1212836	168.6	-0.124	168.6	-0.1786033
168.8	1.010766	168.8	0.9416571	168.8	1.00455	168.8	1.009626	168.8	0.9868212	168.8	1.020624	168.8	1.047049	168.8	-0.2065592	168.8	-0.1952018	168.8	-0.2218461	168.8	-0.1963259	168.8	-0.1921623	168.8	-0.1612807	168.8	-0.1192143	168.8	-0.1221392	168.8	-0.174217
169	1.017909	169	0.9410655	169	1.010808	169	1.013609	169	0.9891772	169	1.022614	169	1.046184	169	-0.2110845	169	-0.1948868	169	-0.2258558	169	-0.1978825	169	-0.1883926	169	-0.1614621	169	-0.1244853	169	-0.1260647	169	-0.1692154
169.2	1.011448	169.2	0.9378218	169.2	1.006743	169.2	1.018614	169.2	0.9877239	169.2	1.026737	169.2	1.048755	169.2	-0.207528	169.2	-0.1912069	169.2	-0.2242476	169.2	-0.1924738	169.2	-0.1841112	169.2	-0.1593817	169.2	-0.1168951	169.2	-0.1241143	169.2	-0.1746775
169.4	1.015325	169.4	0.9358701	169.4	1.017606	169.4	1.014219	169.4	0.9915526	169.4	1.025597	169.4	1.052591	169.4	-0.2082497	169.4	-0.1910262	169.4	-0.2242374	169.4	-0.1921646	169.4	-0.1837629	169.4	-0.1568735	169.4	-0.1217405	169.4	-0.1244046	169.4	-0.1732816
169.6	1.020164	169.6	0.9407099	169.6	1.014416	169.6	1.018554	169.6	0.9908673	169.6	1.026875	169.6	1.047642	169.6	-0.2081317	169.6	-0.1942957	169.6	-0.2269675	169.6	-0.1948554	169.6	-0.1847847	169.6	-0.1549467	169.6	-0.1187631	169.6	-0.1274535	169.6	-0.1784193
169.8	1.018269	169.8	0.9373714	169.8	1.013617	169.8	1.018872	169.8	0.9878336	169.8	1.026793	169.8	1.051783	169.8	-0.2036229	169.8	-0.1929607	169.8	-0.2241193	169.8	-0.1922375	169.8	-0.18762	169.8	-0.15953	169.8	-0.1207686	169.8	-0.1216976	169.8	-0.1745439
170	1.058325	170	0.9795679	170	1.059094	170	1.056386	170	1.035925	170	1.067411	170	1.097881	170	-0.2092036	170	-0.1914978	170	-0.2250988	170	-0.1920479	170	-0.1845761	170	-0.1564203	170	-0.1165158	170	-0.1233187	170	-0.1687253
170.2	1.061921	170.2	0.9919108	170.2	1.06893	170.2	1.066165	170.2	1.03704	170.2	1.071751	170.2	1.103413	170.2	-0.211686	170.2	-0.187796	170.2	-0.2222539	170.2	-0.1910297	170.2	-0.1819182	170.2	-0.1575705	170.2	-0.1172881	170.2	-0.1222217	170.2	-0.1708868
170.4	1.064707	170.4	0.9930931	170.4	1.066601	170.4	1.066812	170.4	1.045144	170.4	1.079544	170.4	1.098211	170.4	-0.2076104	170.4	-0.1923808	170.4	-0.2267556	170.4	-0.1975028	170.4	-0.1847415	170.4	-0.1617165	170.4	-0.1140527	170.4	-0.1235902	170.4	-0.1753627
170.6	1.066788	170.6	0.9951885	170.6	1.069839	170.6	1.070998	170.6	1.04271	170.6	1.073884	170.6	1.109396	170.6	-0.2128038	170.6	-0.1957912	170.6	-0.2235397	170.6	-0.1916129	170.6	-0.1873589	170.6	-0.155767	170.6	-0.1156814	170.6	-0.1222896	170.6	-0.1672762
170.8	1.069273	170.8	0.9967787	170.8	1.06587	170.8	1.06875	170.8	1.043115	170.8	1.079831	170.8	1.108698	170.8	-0.2139625	170.8	-0.1913485	170.8	-0.2206852	170.8	-0.1945966	170.8	-0.1890112	170.8	-0.1566387	170.8	-0.1117055	170.8	-0.116717	170.8	-0.1752126
171	1.071863	171	0.9984326	171	1.069971	171	1.069329	171	1.043783	171	1.077589	171	1.105401	171	-0.2068605	171	-0.1852335	171	-0.2219486	171	-0.1905441	171	-0.182918	171	-0.1563633	171	-0.1193851	171	-0.1215022	171	-0.172489
171.2	1.071687	171.2	0.9956049	171.2	1.067927	171.2	1.071276	171.2	1.049207	171.2	1.078068	171.2	1.110377	171.2	-0.206036	171.2	-0.1897922	171.2	-0.2182278	171.2	-0.1942967	171.2	-0.1866855	171.2	-0.1579691	171.2	-0.1136708	171.2	-0.118445	171.2	-0.1717715
171.4	1.070064	171.4	0.9994423	171.4	1.071906	171.4	1.069445	171.4	1.051152	171.4	1.080099	171.4	1.112828	171.4	-0.2078781	171.4	-0.1924655	171.4	-0.2226187	171.4	-0.1930073	171.4	-0.184736	171.4	-0.1489552	171.4	-0.1193398	171.4	-0.1150526	171.4	-0.173318
171.6	1.073681	171.6	0.9978269	171.6	1.070171	171.6	1.071646	171.6	1.049596	171.6	1.081651	171.6	1.112398	171.6	-0.208707	171.6	-0.1931347	171.6	-0.2199749	171.6	-0.1930908	171.6	-0.1764349	171.6	-0.1528021	171.6	-0.1136847	171.6	-0.1193772	171.6	-0.1717488
171.8	1.072045	171.8	1.00047	171.8	1.071322	171.8	1.074318	171.8	1.046039	171.8	1.086118	171.8	1.112689	171.8	-0.2066538	171.8	-0.1938654	171.8	-0.2166395	171.8	-0.1889233	171.8	-0.184524	171.8	-0.1542557	171.8	-0.120839	171.8	-0.123182	171.8	-0.1729843
172	1.076514	172	1.003919	172	1.066712	172	1.074261	172	1.050762	172	1.08615	172	1.116908	172	-0.2049715	172	-0.1913033	172	-0.2209941	172	-0.1901802	172	-0.1819847	172	-0.1540149	172	-0.1152296	172	-0.1197296	172	-0.1696223
172.2	1.075263	172.2	1.004717	172.2	1.074204	172.2	1.075135	172.2	1.049648	172.2	1.082923	172.2	1.111908	172.2	-0.2095142	172.2	-0.188149	172.2	-0.2225419	172.2	-0.1854602	172.2	-0.1873207	172.2	-0.1526495	172.2	-0.1180713	172.2	-0.1224847	172.2	-0.1700028
172.4	1.082441	172.4	1.000368	172.4	1.069129	172.4	1.073495	172.4	1.04872	172.4	1.083263	172.4	1.116032	172.4	-0.2076974	172.4	-0.1881553	172.4	-0.2195977	172.4	-0.1931438	172.4	-0.1856498	172.4	-0.1505901	172.4	-0.1162208	172.4	-0.1173592	172.4	-0.1752649
172.6	1.070721	172.6	1.001569	172.6	1.073581	172.6	1.07367	172.6	1.049948	172.6	1.083916	172.6	1.118126	172.6	-0.2064156	172.6	-0.1892667	172.6	-0.2202408	172.6	-0.187497	172.6	-0.1805657	172.6	-0.1532306	172.6	-0.115306	172.6	-0.1243437	172.6	-0.1705894
172.8	1.078259	172.8	1.004957	172.8	1.073153	172.8	1.076664	172.8	1.047775	172.8	1.088138	172.8	1.116074	172.8	-0.2050772	172.8	-0.1909736	172.8	-0.2240601	172.8	-0.1878238	172.8	-0.1765957	172.8	-0.1583878	172.8	-0.1131205	172.8	-0.1193656	172.8	-0.1749906
173	1.077453	173	1.00422	173	1.075522	173	1.081047	173	1.053482	173	1.089942	173	1.114429	173	-0.20774	173	-0.1880573	173	-0.2219742	173	-0.1845345	173	-0.1823613	173	-0.1563751	173	-0.1161562	173	-0.1167471	173	-0.174878
173.2	1.076157	173.2	1.002589	173.2	1.072889	173.2	1.077388	173.2	1.055365	173.2	1.090475	173.2	1.116582	173.2	-0.2033564	173.2	-0.1903889	173.2	-0.2182173	173.2	-0.1880226	173.2	-0.1765792	173.2	-0.1568633	173.2	-0.1167048	173.2	-0.1211309	173.2	-0.1681066
173.4	1.074682	173.4	1.001172	173.4	1.077449	173.4	1.077532	173.4	1.053193	173.4	1.087644	173.4	1.119146	173.4	-0.2083415	173.4	-0.1868092	173.4	-0.2223683	173.4	-0.1884189	173.4	-0.1861479	173.4	-0.1546283	173.4	-0.1148263	173.4	-0.1210477	173.4	-0.1685986
173.6	1.077776	173.6	1.001863	173.6	1.078285	173.6	1.07495	173.6	1.054812	173.6	1.087534	173.6	1.114335	173.6	-0.2030308	173.6	-0.1856692	173.6	-0.2168206	173.6	-0.1903325	173.6	-0.1812414	173.6	-0.1550715	173.6	-0.116201	173.6	-0.1184492	173.6	-0.1688703
173.8	1.07835	173.8	1.006939	173.8	1.078021	173.8	1.079211	173.8	1.054376	173.8	1.08783	173.8	1.117795	173.8	-0.2058366	173.8	-0.1852141	173.8	-0.2199842	173.8	-0.1880989	173.8	-0.1803216	173.8	-0.1521831	173.8	-0.1121988	173.8	-0.1180253	173.8	-0.1737532
174	1.076313	174	1.004669	174	1.078022	174	1.079012	174	1.0538	174	1.085387	174	1.1224	174	-0.2031116	174	-0.1855579	174	-0.2224008	174	-0.1864407	174	-0.181121	174	-0.1503735	174	-0.1135727	174	-0.1161245	174	-0.1693543
174.2	1.079631	174.2	1.005622	174.2	1.077945	174.2	1.080225	174.2	1.053817	174.2	1.090449	174.2	1.119681	174.2	-0.2034918	174.2	-0.1873179	174.2	-0.2206861	174.2	-0.1895232	174.2	-0.183411	174.2	-0.1498778	174.2	-0.1133017	174.2	-0.1168325	174.2	-0.1702983
174.4	1.078795	174.4	1.003304	174.4	1.07896	174.4	1.076552	174.4	1.053564	174.4	1.089785	174.4	1.118359	174.4	-0.2078294	174.4	-0.1849862	174.4	-0.220485	174.4	-0.1885265	174.4	-0.1833354	174.4	-0.1522297	174.4	-0.110255	174.4	-0.1120801	174.4	-0.1734655
174.6	1.080367	174.6	1.005461	174.6	1.078491	174.6	1.074864	174.6	1.057042	174.6	1.089748	174.6	1.119889	174.6	-0.203617	174.6	-0.1893988	174.6	-0.2196223	174.6	-0.1868659	174.6	-0.1795345	174.6	-0.1479155	174.6	-0.1077902	174.6	-0.1161853	174.6	-0.170683
174.8	1.076741	174.8	1.007683	174.8	1.081869	174.8	1.07985	174.8	1.058954	174.8	1.088635	174.8	1.120076	174.8	-0.2021104	174.8	-0.1866345	174.8	-0.2168535	174.8	-0.1878215	174.8	-0.1775837	174.8	-0.1543299	174.8	-0.1148655	174.8	-0.1172346	174.8	-0.1653606
175	1.07874	175	1.007583	175	1.080183	175	1.077942	175	1.055458	175	1.088729	175	1.118713	175	-0.2080745	175	-0.1876282	175	-0.2162617	175	-0.1886485	175	-0.1820676	175	-0.1503618	175	-0.1126444	175	-0.1201235	175	-0.1698485
175.2	1.08203	175.2	1.006636	175.2	1.079885	175.2	1.079054	175.2	1.05678	175.2	1.090427	175.2	1.118722	175.2	-0.2072147	175.2	-0.185338	175.2	-0.215289	175.2	-0.1840432	175.2	-0.1765348	175.2	-0.1520302	175.2	-0.1119565	175.2	-0.1157398	175.2	-0.1664607
175.4	1.078914	175.4	1.009536	175.4	1.080325	175.4	1.07944	175.4	1.060537	175.4	1.091233	175.4	1.124952	175.4	-0.2021229	175.4	-0.1821709	175.4	-0.2161863	175.4	-0.1943047	175.4	-0.1772331	175.4	-0.1531805	175.4	-0.111292	175.4	-0.1144345	175.4	-0.1667039
175.6	1.078526	175.6	1.006105	175.6	1.079822	175.6	1.081317	175.6	1.057935	175.6	1.091971	175.6	1.117189	175.6	-0.2002679	175.61	-0.1855144	175.61	-0.2119222	175.61	-0.1877762	175.61	-0.179365	175.61	-0.1493222	175.61	-0.1089769	175.61	-0.1172151	175.61	-0.1687956
175.8	1.080518	175.8	1.010566	175.8	1.083843	175.8	1.086388	175.8	1.059341	175.8	1.096413	175.8	1.124085	175.8	-0.2018259	175.8	-0.1868292	175.8	-0.2157397	175.8	-0.1879676	175.8	-0.1785228	175.8	-0.1503415	175.8	-0.110889	175.8	-0.1152713	175.8	-0.1694202
176	1.083633	176	1.0117	176	1.081268	176	1.080884	176	1.057423	176	1.092515	176	1.124725	176	-0.2076591	176	-0.1867861	176	-0.2212244	176	-0.1885962	176	-0.1818598	176	-0.1552262	176	-0.1079056	176	-0.114602	176	-0.1647179
176.2	1.079204	176.2	1.008272	176.2	1.080972	176.2	1.082197	176.2	1.05832	176.2	1.094013	176.2	1.123521	176.2	-0.2043566	176.2	-0.1854777	176.2	-0.2161934	176.2	-0.1825399	176.2	-0.1825896	176.2	-0.1493717	176.2	-0.1099887	176.2	-0.1150998	176.2	-0.1704959
176.4	1.079222	176.4	1.008421	176.4	1.080023	176.4	1.081688	176.4	1.058074	176.4	1.092868	176.4	1.121186	176.4	-0.2022167	176.4	-0.1884776	176.4	-0.2171389	176.4	-0.1921267	176.4	-0.1817734	176.4	-0.148528	176.4	-0.1109281	176.4	-0.1134469	176.4	-0.1720394
176.6	1.08289	176.6	1.008546	176.6	1.081635	176.6	1.084011	176.6	1.057948	176.6	1.09457	176.6	1.126369	176.6	-0.2023014	176.6	-0.1830279	176.6	-0.2140514	176.6	-0.1870348	176.6	-0.1737916	176.6	-0.1523337	176.6	-0.1124073	176.6	-0.1155152	176.6	-0.1714559
176.8	1.086352	176.8	1.01021	176.8	1.085891	176.8	1.084099	176.8	1.056297	176.8	1.093441	176.8	1.126917	176.8	-0.199457	176.8	-0.1868777	176.8	-0.2174612	176.8	-0.1861494	176.8	-0.1763042	176.8	-0.1446033	176.8	-0.1141712	176.8	-0.1163459	176.8	-0.1731096
177	1.079968	177	1.012669	177	1.079049	177	1.081163	177	1.054029	177	1.089706	177	1.123795	177	-0.2006355	177	-0.1824801	177	-0.2183069	177	-0.1880848	177	-0.1804514	177	-0.1491091	177	-0.1151398	177	-0.111234	177	-0.165721
177.2	1.079748	177.2	1.011654	177.2	1.085052	177.2	1.086098	177.2	1.062134	177.2	1.091909	177.2	1.123945	177.2	-0.2064169	177.2	-0.1872081	177.2	-0.2167068	177.2	-0.1873321	177.2	-0.1768398	177.2	-0.1480624	177.2	-0.1121083	177.2	-0.1068674	177.2	-0.1651122
177.4	1.081725	177.4	1.009377	177.4	1.079692	177.4	1.085678	177.4	1.058172	177.4	1.092956	177.4	1.13057	177.4	-0.2027432	177.4	-0.1876553	177.4	-0.2153642	177.4	-0.1829468	177.4	-0.1819807	177.4	-0.1520975	177.4	-0.1135641	177.4	-0.1165937	177.4	-0.1658082
177.6	1.081702	177.6	1.013653	177.6	1.084437	177.6	1.085307	177.6	1.057644	177.6	1.095933	177.6	1.124823	177.6	-0.20728	177.6	-0.1899787	177.6	-0.2139896	177.6	-0.1864831	177.6	-0.1770512	177.6	-0.1488338	177.6	-0.1123268	177.6	-0.1134832	177.6	-0.1659902
177.8	1.087124	177.8	1.010255	177.8	1.081266	177.8	1.085365	177.8	1.064326	177.8	1.09679	177.8	1.128366	177.8	-0.1995452	177.8	-0.1822147	177.8	-0.2164661	177.8	-0.1919227	177.8	-0.1756723	177.8	-0.1434972	177.8	-0.1077106	177.8	-0.1133325	177.8	-0.1688423
178	1.084893	178	1.013965	178	1.083607	178	1.084147	178	1.062326	178	1.0937	178	1.120003	178	-0.2036866	178	-0.1818212	178	-0.2150406	178	-0.1854375	178	-0.1798251	178	-0.1505883	178	-0.1134512	178	-0.1121377	178	-0.1670145
178.2	1.081738	178.2	1.006136	178.2	1.082601	178.2	1.084319	178.2	1.062156	178.2	1.096085	178.2	1.123417	178.2	-0.2005544	178.2	-0.1833063	178.2	-0.210024	178.2	-0.1831954	178.2	-0.1766538	178.2	-0.1483229	178.2	-0.1085248	178.2	-0.1112619	178.2	-0.1672999
178.4	1.084186	178.4	1.018023	178.4	1.088241	178.4	1.081112	178.4	1.063038	178.4	1.096063	178.4	1.125664	178.4	-0.2018447	178.4	-0.1807735	178.4	-0.2144748	178.4	-0.1883003	178.4	-0.1795411	178.4	-0.1488093	178.4	-0.1130463	178.4	-0.110333	178.4	-0.1643207
178.6	1.087677	178.6	1.015517	178.6	1.084178	178.6	1.083435	178.6	1.060406	178.6	1.094442	178.6	1.123469	178.6	-0.2041224	178.6	-0.1789738	178.6	-0.2190031	178.6	-0.189183	178.6	-0.1752551	178.6	-0.142813	178.6	-0.1077906	178.6	-0.1165684	178.6	-0.166161
178.8	1.08004	178.8	1.014855	178.8	1.08957	178.8	1.086762	178.8	1.060656	178.8	1.095633	178.8	1.13148	178.8	-0.1978435	178.8	-0.1818206	178.8	-0.2097087	178.8	-0.1869847	178.8	-0.1750084	178.8	-0.1445041	178.8	-0.1096279	178.8	-0.1129727	178.8	-0.1677711
179	1.083123	179	1.014356	179	1.082308	179	1.087457	179	1.061284	179	1.099405	179	1.123003	179	-0.1999684	179	-0.179998	179	-0.2106652	179	-0.183844	179	-0.1774558	179	-0.1498524	179	-0.1111833	179	-0.1141902	179	-0.1662902
179.2	1.087699	179.2	1.016184	179.2	1.086645	179.2	1.087858	179.2	1.063083	179.2	1.091272	179.2	1.129377	179.2	-0.198376	179.2	-0.183299	179.2	-0.2135907	179.2	-0.1813745	179.2	-0.1760754	179.2	-0.1462949	179.2	-0.1093334	179.2	-0.1168476	179.2	-0.1686496
179.4	1.084135	179.4	1.016814	179.4	1.085589	179.4	1.085621	179.4	1.062419	179.4	1.095035	179.4	1.126251	179.4	-0.2011774	179.4	-0.1858617	179.4	-0.215405	179.4	-0.1856694	179.4	-0.1728749	179.4	-0.1474499	179.4	-0.1083777	179.4	-0.1104881	179.4	-0.1657225
179.6	1.083659	179.6	1.016527	179.6	1.089203	179.6	1.08788	179.6	1.061532	179.6	1.093594	179.6	1.127703	179.6	-0.1979793	179.6	-0.179928	179.6	-0.2161852	179.6	-0.1807691	179.6	-0.1761619	179.6	-0.1492487	179.6	-0.105547	179.6	-0.1106931	179.6	-0.170512
179.8	1.08799	179.8	1.014287	179.8	1.083405	179.8	1.084574	179.8	1.06496	179.8	1.097169	179.8	1.129729	179.8	-0.2044242	179.8	-0.1821615	179.8	-0.2199835	179.8	-0.1838502	179.8	-0.1732376	179.8	-0.147355	179.8	-0.1081584	179.8	-0.1101604	179.8	-0.1679837
180	1.083814	180	1.01902	180	1.081859	180	1.090806	180	1.062899	180	1.098307	180	1.130583	180	-0.2002985	180	-0.1806437	180	-0.2105847	180	-0.1811137	180	-0.1785014	180	-0.1452373	180	-0.1047853	180	-0.1120856	180	-0.1668435
180.2	1.088773	180.2	1.013542	180.2	1.086336	180.2	1.088874	180.2	1.067544	180.2	1.101358	180.2	1.129357	180.2	-0.2015439	180.2	-0.18037	180.2	-0.2097319	180.2	-0.1832993	180.2	-0.1731526	180.2	-0.1476767	180.2	-0.1084381	180.2	-0.1140299	180.2	-0.1672293
180.4	1.088018	180.4	1.016395	180.4	1.083847	180.4	1.084919	180.4	1.064573	180.4	1.098484	180.4	1.129899	180.4	-0.1979925	180.4	-0.1815995	180.4	-0.2109079	180.4	-0.1832151	180.4	-0.1746876	180.4	-0.1441565	180.4	-0.1020998	180.4	-0.1097038	180.4	-0.1638057
180.6	1.084095	180.6	1.018326	180.6	1.086272	180.6	1.085457	180.6	1.064826	180.6	1.098669	180.6	1.125095	180.6	-0.1978391	180.6	-0.1845009	180.6	-0.2105357	180.6	-0.1841524	180.6	-0.1770526	180.6	-0.1484017	180.6	-0.1078954	180.6	-0.1114778	180.6	-0.1669899
180.8	1.088192	180.8	1.016177	180.8	1.094869	180.8	1.088381	180.8	1.060871	180.8	1.100501	180.8	1.129256	180.8	-0.1989568	180.8	-0.1849009	180.8	-0.2117932	180.8	-0.1823453	180.8	-0.1769916	180.8	-0.1457241	180.8	-0.108808	180.8	-0.1105784	180.8	-0.1642223
181	1.085665	181	1.01641	181	1.087243	181	1.08906	181	1.068902	181	1.106873	181	1.129975	181	-0.2005397	181	-0.1834513	181	-0.2087923	181	-0.1813954	181	-0.1728279	181	-0.1481991	181	-0.1017592	181	-0.112829	181	-0.1634246
181.2	1.093235	181.2	1.019367	181.2	1.086275	181.2	1.088569	181.2	1.065049	181.2	1.095614	181.2	1.130663	181.2	-0.1986376	181.2	-0.1795276	181.2	-0.2115263	181.2	-0.1785902	181.2	-0.175496	181.2	-0.1469982	181.2	-0.1073189	181.2	-0.114423	181.2	-0.1664912
181.4	1.087182	181.4	1.020586	181.4	1.086702	181.4	1.091329	181.4	1.062625	181.4	1.099223	181.4	1.125807	181.4	-0.2002658	181.4	-0.1847152	181.4	-0.2099848	181.4	-0.1837401	181.4	-0.1752014	181.4	-0.1448745	181.4	-0.1116223	181.4	-0.1161868	181.4	-0.1630711
181.6	1.092289	181.6	1.011839	181.6	1.090759	181.6	1.091018	181.6	1.064686	181.6	1.099806	181.6	1.13096	181.6	-0.1995325	181.6	-0.180839	181.6	-0.2144667	181.6	-0.1823411	181.6	-0.1735609	181.6	-0.1443589	181.6	-0.10281	181.6	-0.1066309	181.6	-0.1658198
181.8	1.089569	181.8	1.017544	181.8	1.088108	181.8	1.090264	181.8	1.061694	181.8	1.098009	181.8	1.131918	181.8	-0.2026179	181.81	-0.1838317	181.81	-0.2098864	181.81	-0.1795613	181.81	-0.1733527	181.81	-0.1468148	181.81	-0.1040625	181.81	-0.1111887	181.81	-0.1624565
182	1.086252	182	1.014912	182	1.086497	182	1.085576	182	1.066263	182	1.099148	182	1.131627	182	-0.1937859	182	-0.1825048	182	-0.2149484	182	-0.1844694	182	-0.1720001	182	-0.142074	182	-0.108946	182	-0.1067484	182	-0.164852
182.2	1.082233	182.2	1.016362	182.2	1.083802	182.2	1.084637	182.2	1.061197	182.2	1.09891	182.2	1.133526	182.2	-0.1985705	182.2	-0.1826456	182.2	-0.2112952	182.2	-0.1821475	182.2	-0.1697829	182.2	-0.1443091	182.2	-0.1043083	182.2	-0.1062045	182.2	-0.1590403
182.4	1.083711	182.4	1.017078	182.4	1.089947	182.4	1.088774	182.4	1.068193	182.4	1.102271	182.4	1.131686	182.4	-0.1965216	182.4	-0.1761698	182.4	-0.2120889	182.4	-0.1790588	182.4	-0.1739587	182.4	-0.1427677	182.4	-0.1066491	182.4	-0.108848	182.4	-0.1689068
182.6	1.084194	182.6	1.019803	182.6	1.092662	182.6	1.08678	182.6	1.065336	182.6	1.098127	182.6	1.133566	182.6	-0.2012682	182.6	-0.1791054	182.6	-0.2117374	182.6	-0.1810175	182.6	-0.1671349	182.6	-0.1434836	182.6	-0.1048845	182.6	-0.1113982	182.6	-0.1656687
182.8	1.087713	182.8	1.01714	182.8	1.0965	182.8	1.085666	182.8	1.063249	182.8	1.105043	182.8	1.133769	182.8	-0.1955599	182.8	-0.1817804	182.8	-0.2102477	182.8	-0.1806171	182.8	-0.1708669	182.8	-0.1473455	182.8	-0.1025221	182.8	-0.1054481	182.8	-0.1638624
183	1.086686	183	1.02004	183	1.087786	183	1.090084	183	1.066331	183	1.105319	183	1.13455	183	-0.1934948	183	-0.1757152	183	-0.2097422	183	-0.1797203	183	-0.1679397	183	-0.1427721	183	-0.1035443	183	-0.1120481	183	-0.162911
183.2	1.089808	183.2	1.020845	183.2	1.088726	183.2	1.090795	183.2	1.065938	183.2	1.099768	183.2	1.133076	183.2	-0.1992788	183.2	-0.1823456	183.2	-0.2118099	183.2	-0.1787554	183.2	-0.1710267	183.2	-0.1417083	183.2	-0.1052077	183.2	-0.108728	183.2	-0.1637954
183.4	1.091533	183.4	1.019049	183.4	1.088447	183.4	1.090162	183.4	1.066072	183.4	1.104893	183.4	1.133865	183.4	-0.1998535	183.4	-0.1780527	183.4	-0.208656	183.4	-0.1793021	183.4	-0.169884	183.4	-0.1413008	183.4	-0.1044437	183.4	-0.106917	183.4	-0.1625858
183.6	1.091091	183.6	1.018996	183.6	1.089976	183.6	1.091256	183.6	1.064493	183.6	1.104501	183.6	1.132913	183.6	-0.1975301	183.6	-0.1802557	183.6	-0.2065483	183.6	-0.1754859	183.6	-0.1710125	183.6	-0.1471543	183.6	-0.1052147	183.6	-0.1098883	183.6	-0.1625726
183.8	1.091255	183.8	1.020713	183.8	1.091503	183.8	1.091262	183.8	1.065064	183.8	1.102921	183.8	1.134588	183.8	-0.1946071	183.8	-0.1792763	183.8	-0.2086586	183.8	-0.1802709	183.8	-0.1723191	183.8	-0.1404504	183.8	-0.1028838	183.8	-0.105637	183.8	-0.162114
184	1.084649	184	1.01904	184	1.088498	184	1.090782	184	1.067229	184	1.103069	184	1.137101	184	-0.1958399	184	-0.1750701	184	-0.208247	184	-0.1765764	184	-0.1713595	184	-0.1390057	184	-0.1022411	184	-0.1097072	184	-0.1628036
184.2	1.089249	184.2	1.020784	184.2	1.091573	184.2	1.090916	184.2	1.062688	184.2	1.100632	184.2	1.133011	184.2	-0.1976863	184.2	-0.1774479	184.2	-0.2074902	184.2	-0.1779601	184.2	-0.1677802	184.2	-0.1406496	184.2	-0.1023957	184.2	-0.1081562	184.2	-0.1604448
184.4	1.0906	184.4	1.018202	184.4	1.09172	184.4	1.08256	184.4	1.06488	184.4	1.106329	184.4	1.137032	184.4	-0.1939358	184.4	-0.1797182	184.4	-0.2068895	184.4	-0.1780095	184.4	-0.1732334	184.4	-0.1437375	184.4	-0.1045567	184.4	-0.1095313	184.4	-0.1634341
184.6	1.096302	184.6	1.022561	184.6	1.091143	184.6	1.093158	184.6	1.064226	184.6	1.102345	184.6	1.129316	184.6	-0.194147	184.6	-0.1761224	184.6	-0.2066599	184.6	-0.1781409	184.6	-0.1731861	184.6	-0.1415493	184.6	-0.1090796	184.6	-0.1081345	184.6	-0.1622383
184.8	1.093161	184.8	1.017545	184.8	1.093852	184.8	1.089219	184.8	1.065497	184.8	1.103035	184.8	1.131222	184.8	-0.196031	184.8	-0.1788185	184.8	-0.2102951	184.8	-0.1817045	184.8	-0.1682923	184.8	-0.1467211	184.8	-0.1018907	184.8	-0.1070989	184.8	-0.1608839
185	1.08795	185	1.02212	185	1.088685	185	1.091976	185	1.068109	185	1.105754	185	1.133037	185	-0.1972812	185	-0.1718516	185	-0.2111629	185	-0.1776898	185	-0.1690971	185	-0.1433136	185	-0.1057147	185	-0.1058169	185	-0.1602557
185.2	1.090846	185.2	1.023096	185.2	1.091752	185.2	1.09101	185.2	1.065863	185.2	1.102336	185.2	1.134866	185.2	-0.1933725	185.23	-0.1727955	185.23	-0.2052093	185.23	-0.1749611	185.23	-0.1649676	185.23	-0.1422716	185.23	-0.1070968	185.23	-0.108622	185.23	-0.1633656
185.4	1.090901	185.4	1.022424	185.4	1.092399	185.4	1.088427	185.4	1.07113	185.4	1.103241	185.4	1.132505	185.4	-0.1980404	185.4	-0.1741452	185.4	-0.2111441	185.4	-0.1782474	185.4	-0.1683594	185.4	-0.1426598	185.4	-0.1022367	185.4	-0.1052355	185.4	-0.1595683
185.6	1.089509	185.6	1.020871	185.6	1.092285	185.6	1.088499	185.6	1.069631	185.6	1.103966	185.6	1.129502	185.6	-0.1917007	185.6	-0.1779438	185.6	-0.20663	185.6	-0.1774011	185.6	-0.1708121	185.6	-0.1389586	185.6	-0.101924	185.6	-0.1090054	185.6	-0.1637499
185.8	1.092498	185.8	1.020562	185.8	1.095399	185.8	1.088196	185.8	1.069296	185.8	1.10564	185.8	1.134046	185.8	-0.1946892	185.8	-0.1804319	185.8	-0.2082179	185.8	-0.1777151	185.8	-0.1729808	185.8	-0.140486	185.8	-0.1052046	185.8	-0.104757	185.8	-0.1570713
186	1.093611	186	1.024612	186	1.092502	186	1.095898	186	1.068521	186	1.099488	186	1.131734	186	-0.1968821	186	-0.1732903	186	-0.2061708	186	-0.1798182	186	-0.1729799	186	-0.1399834	186	-0.1028475	186	-0.1044978	186	-0.1685116
186.2	1.090509	186.2	1.023335	186.2	1.093639	186.2	1.092743	186.2	1.072393	186.2	1.106512	186.2	1.138062	186.2	-0.1937888	186.21	-0.1734692	186.21	-0.203432	186.21	-0.1752996	186.21	-0.1695614	186.21	-0.1428631	186.21	-0.09724796	186.21	-0.104472	186.21	-0.1596199
186.4	1.094509	186.4	1.017247	186.4	1.095732	186.4	1.094316	186.4	1.074733	186.4	1.100862	186.4	1.138081	186.4	-0.1966505	186.4	-0.17736	186.4	-0.206738	186.4	-0.1759521	186.4	-0.1702908	186.4	-0.1404263	186.4	-0.100579	186.4	-0.1051997	186.4	-0.1580633
186.6	1.094012	186.6	1.020876	186.6	1.096174	186.6	1.092294	186.6	1.069704	186.6	1.102859	186.6	1.137908	186.6	-0.1959687	186.6	-0.1766544	186.6	-0.2089351	186.6	-0.1772178	186.6	-0.166744	186.6	-0.1413057	186.6	-0.1035494	186.6	-0.1055926	186.6	-0.1602173
186.8	1.093113	186.8	1.020263	186.8	1.095686	186.8	1.095623	186.8	1.067332	186.8	1.105567	186.8	1.134943	186.8	-0.1903405	186.8	-0.1729619	186.8	-0.2073248	186.8	-0.1758272	186.8	-0.1622909	186.8	-0.1363755	186.8	-0.1003402	186.8	-0.109307	186.8	-0.1667334
187	1.09469	187	1.026801	187	1.093629	187	1.093485	187	1.062647	187	1.104696	187	1.135551	187	-0.1951822	187	-0.1743305	187	-0.206167	187	-0.178318	187	-0.1681125	187	-0.1389321	187	-0.09776005	187	-0.1046057	187	-0.1622998
187.2	1.094169	187.2	1.02339	187.2	1.095371	187.2	1.094094	187.2	1.067505	187.2	1.104029	187.2	1.136158	187.2	-0.1933208	187.2	-0.1744597	187.2	-0.2054279	187.2	-0.1764601	187.2	-0.1691057	187.2	-0.134424	187.2	-0.09902832	187.2	-0.1052837	187.2	-0.1599299
187.4	1.096553	187.4	1.024034	187.4	1.095057	187.4	1.094577	187.4	1.067764	187.4	1.106691	187.4	1.135186	187.4	-0.1936077	187.4	-0.1752439	187.4	-0.2112937	187.4	-0.1761497	187.4	-0.1648044	187.4	-0.1406438	187.4	-0.101328	187.4	-0.103708	187.4	-0.158795
187.6	1.092204	187.6	1.021375	187.6	1.094164	187.6	1.094125	187.6	1.074322	187.6	1.10679	187.6	1.135618	187.6	-0.1929688	187.6	-0.1726897	187.6	-0.2035177	187.6	-0.1798417	187.6	-0.1660438	187.6	-0.137241	187.6	-0.1038782	187.6	-0.1078701	187.6	-0.1614494
187.8	1.095454	187.8	1.025479	187.8	1.093068	187.8	1.096673	187.8	1.072081	187.8	1.107715	187.8	1.135438	187.8	-0.1933649	187.8	-0.1750097	187.8	-0.2030461	187.8	-0.179943	187.8	-0.1667531	187.8	-0.1418584	187.8	-0.1031018	187.8	-0.09825958	187.8	-0.1620752
188	1.095891	188	1.020384	188	1.09852	188	1.091433	188	1.068314	188	1.10478	188	1.133449	188	-0.1961337	188	-0.1749327	188	-0.2075194	188	-0.173251	188	-0.1718936	188	-0.1408235	188	-0.09947437	188	-0.1028279	188	-0.1617929
188.2	1.091001	188.2	1.025488	188.2	1.094265	188.2	1.093196	188.2	1.076471	188.2	1.104799	188.2	1.136483	188.2	-0.1953607	188.2	-0.1713806	188.2	-0.2035186	188.2	-0.1736246	188.2	-0.1655975	188.2	-0.1421461	188.2	-0.09895106	188.2	-0.1024219	188.2	-0.1623542
188.4	1.091699	188.4	1.020338	188.4	1.095484	188.4	1.092191	188.4	1.07022	188.4	1.1038	188.4	1.140524	188.4	-0.190263	188.4	-0.1738977	188.4	-0.2044049	188.4	-0.1730863	188.4	-0.1652509	188.4	-0.1427326	188.4	-0.1002759	188.4	-0.1003338	188.4	-0.1645074
188.6	1.098719	188.6	1.024005	188.6	1.100044	188.6	1.096507	188.6	1.072105	188.6	1.105245	188.6	1.13423	188.6	-0.2024584	188.6	-0.1737854	188.6	-0.2089429	188.6	-0.1754783	188.6	-0.1705321	188.6	-0.1356594	188.6	-0.09926997	188.6	-0.1046446	188.6	-0.1595113
188.8	1.091998	188.8	1.025223	188.8	1.093761	188.8	1.094246	188.8	1.074037	188.8	1.105465	188.8	1.139081	188.8	-0.192523	188.8	-0.1728476	188.8	-0.2045946	188.8	-0.177864	188.8	-0.1669062	188.8	-0.1401128	188.8	-0.09977066	188.8	-0.1046482	188.8	-0.1610871
189	1.094187	189	1.025746	189	1.095918	189	1.095083	189	1.0724	189	1.108174	189	1.137303	189	-0.1908757	189	-0.1734016	189	-0.203137	189	-0.1766593	189	-0.1654093	189	-0.1390508	189	-0.09873712	189	-0.1038782	189	-0.1629012
189.2	1.095381	189.2	1.021168	189.2	1.100858	189.2	1.096337	189.2	1.073317	189.2	1.105788	189.2	1.140886	189.2	-0.191116	189.2	-0.1720159	189.2	-0.2020169	189.2	-0.1766296	189.2	-0.1703596	189.2	-0.1401677	189.2	-0.09562499	189.2	-0.1047447	189.2	-0.159305
189.4	1.101247	189.4	1.02435	189.4	1.091664	189.4	1.099053	189.4	1.076755	189.4	1.108446	189.4	1.139535	189.4	-0.1948964	189.4	-0.1715397	189.4	-0.2023961	189.4	-0.1723455	189.4	-0.1687573	189.4	-0.1396976	189.4	-0.09963867	189.4	-0.1018038	189.4	-0.1608118
189.6	1.098058	189.6	1.028423	189.6	1.093457	189.6	1.09516	189.6	1.06853	189.6	1.103991	189.6	1.140168	189.6	-0.1919497	189.6	-0.1793357	189.6	-0.2033027	189.6	-0.1760511	189.6	-0.1600535	189.6	-0.1361085	189.6	-0.09768472	189.6	-0.1016788	189.6	-0.1577487
189.8	1.092613	189.8	1.025378	189.8	1.093614	189.8	1.098915	189.8	1.070117	189.8	1.108794	189.8	1.135086	189.8	-0.1988045	189.8	-0.1724146	189.8	-0.1997787	189.8	-0.1724495	189.8	-0.1642828	189.8	-0.1394927	189.8	-0.1006144	189.8	-0.1042016	189.8	-0.1623384
190	1.090941	190	1.019241	190	1.091392	190	1.093853	190	1.07409	190	1.107944	190	1.137999	190	-0.1979037	190	-0.1704294	190	-0.2043772	190	-0.1716215	190	-0.1680825	190	-0.140076	190	-0.09669803	190	-0.1021485	190	-0.16397
190.2	1.093903	190.2	1.023154	190.2	1.098904	190.2	1.098066	190.2	1.070214	190.2	1.105188	190.2	1.138275	190.2	-0.1898687	190.2	-0.1767734	190.2	-0.1998934	190.2	-0.1734428	190.2	-0.167382	190.2	-0.1381371	190.2	-0.0993345	190.2	-0.1014434	190.2	-0.1558118
190.4	1.095278	190.4	1.022038	190.4	1.095509	190.4	1.094887	190.4	1.07721	190.4	1.109028	190.4	1.140019	190.4	-0.1906857	190.4	-0.1743041	190.4	-0.2039738	190.4	-0.1725502	190.4	-0.1630964	190.4	-0.1337048	190.4	-0.09472349	190.4	-0.100734	190.4	-0.1612541
190.6	1.10269	190.6	1.02338	190.6	1.098314	190.6	1.096513	190.6	1.068015	190.6	1.106783	190.6	1.140565	190.6	-0.1872619	190.6	-0.173804	190.6	-0.2029262	190.6	-0.1729907	190.6	-0.1658101	190.6	-0.1375543	190.6	-0.09807011	190.6	-0.09526461	190.6	-0.1591437
190.8	1.099597	190.8	1.027912	190.8	1.093658	190.8	1.094526	190.8	1.076219	190.8	1.107609	190.8	1.138949	190.8	-0.1890264	190.8	-0.1735241	190.8	-0.2013147	190.8	-0.1717919	190.8	-0.1683448	190.8	-0.1364788	190.8	-0.09916923	190.8	-0.09892206	190.8	-0.1587176
191	1.100038	191	1.02534	191	1.09405	191	1.093673	191	1.072471	191	1.110834	191	1.137241	191	-0.1920858	191	-0.1661702	191	-0.2027635	191	-0.171022	191	-0.1613522	191	-0.13709	191	-0.1014687	191	-0.1043917	191	-0.1593341
191.2	1.09936	191.2	1.023763	191.2	1.09356	191.2	1.099786	191.2	1.071219	191.2	1.107577	191.2	1.141318	191.2	-0.19166	191.2	-0.1704962	191.2	-0.2008927	191.2	-0.1735601	191.2	-0.1662606	191.2	-0.1333236	191.2	-0.09674665	191.2	-0.1003584	191.2	-0.1533636
191.4	1.095803	191.4	1.030759	191.4	1.095526	191.4	1.094391	191.4	1.071213	191.4	1.108897	191.4	1.136566	191.4	-0.1909751	191.42	-0.169171	191.42	-0.2029466	191.42	-0.1711655	191.42	-0.1681596	191.42	-0.1408499	191.42	-0.09885486	191.42	-0.1017021	191.42	-0.1580337
191.6	1.097614	191.6	1.025645	191.6	1.097303	191.6	1.102199	191.6	1.077801	191.6	1.112288	191.6	1.137095	191.6	-0.185637	191.6	-0.1680964	191.6	-0.2002599	191.6	-0.1712482	191.6	-0.1627195	191.6	-0.1365858	191.6	-0.09563924	191.6	-0.1013663	191.6	-0.1640875
191.8	1.096273	191.8	1.026878	191.8	1.092926	191.8	1.098483	191.8	1.071781	191.8	1.111801	191.8	1.14379	191.8	-0.1909862	191.8	-0.1711777	191.8	-0.2020323	191.8	-0.1705729	191.8	-0.1626631	191.8	-0.1331156	191.8	-0.0976081	191.8	-0.09613154	191.8	-0.1565124
192	1.095606	192	1.026831	192	1.096513	192	1.099207	192	1.076998	192	1.111776	192	1.137797	192	-0.1902451	192	-0.1715109	192	-0.2045235	192	-0.1773705	192	-0.1658977	192	-0.1349328	192	-0.09958548	192	-0.1012506	192	-0.1607944
192.2	1.096998	192.2	1.02518	192.2	1.099961	192.2	1.099864	192.2	1.075097	192.2	1.109841	192.2	1.144683	192.2	-0.1922611	192.2	-0.1728177	192.2	-0.2016889	192.2	-0.1736884	192.2	-0.1650319	192.2	-0.1368719	192.2	-0.0987185	192.2	-0.1012535	192.2	-0.1522867
192.4	1.097767	192.4	1.031321	192.4	1.099946	192.4	1.097375	192.4	1.070069	192.4	1.11458	192.4	1.143251	192.4	-0.1862723	192.4	-0.1678286	192.4	-0.2017229	192.4	-0.1705565	192.4	-0.1654978	192.4	-0.1381378	192.4	-0.09249817	192.4	-0.09964779	192.4	-0.1622704
192.6	1.099591	192.6	1.028213	192.6	1.097292	192.6	1.100835	192.6	1.069109	192.6	1.109804	192.6	1.140796	192.6	-0.1926666	192.6	-0.1711521	192.6	-0.199206	192.6	-0.1738537	192.6	-0.1626508	192.6	-0.1317581	192.6	-0.09142931	192.6	-0.1035231	192.6	-0.1556936
192.8	1.101623	192.8	1.029765	192.8	1.097746	192.8	1.103325	192.8	1.07182	192.8	1.108194	192.8	1.140376	192.8	-0.1912824	192.8	-0.1708476	192.8	-0.2028743	192.8	-0.1731984	192.8	-0.1635783	192.8	-0.133866	192.8	-0.09683907	192.8	-0.1004383	192.8	-0.1627644
193	1.099972	193	1.027424	193	1.09458	193	1.097688	193	1.074162	193	1.109621	193	1.140229	193	-0.1895357	193	-0.1687793	193	-0.1996677	193	-0.1693595	193	-0.1594014	193	-0.1357105	193	-0.09353051	193	-0.1024219	193	-0.1587018
193.2	1.096259	193.2	1.028618	193.2	1.09904	193.2	1.101815	193.2	1.073473	193.2	1.111514	193.2	1.141867	193.2	-0.190476	193.2	-0.1732255	193.2	-0.2003806	193.2	-0.1720119	193.2	-0.1680332	193.2	-0.1321677	193.2	-0.0945168	193.2	-0.1004037	193.2	-0.1531492
193.4	1.102626	193.4	1.027846	193.4	1.103025	193.4	1.102633	193.4	1.071584	193.4	1.108767	193.4	1.137901	193.4	-0.1916918	193.4	-0.1676795	193.4	-0.1974361	193.4	-0.1640068	193.4	-0.1596173	193.4	-0.1326951	193.4	-0.0959554	193.4	-0.1010667	193.4	-0.1592944
193.6	1.100124	193.6	1.027862	193.6	1.09857	193.6	1.101093	193.6	1.076773	193.6	1.107606	193.6	1.146106	193.6	-0.1908056	193.6	-0.168459	193.6	-0.1941207	193.6	-0.167015	193.6	-0.1609767	193.6	-0.1323515	193.6	-0.09294604	193.6	-0.1005334	193.6	-0.1536291
193.8	1.101744	193.8	1.028536	193.8	1.100731	193.8	1.100098	193.8	1.073189	193.8	1.111328	193.8	1.145169	193.8	-0.1914575	193.8	-0.1685697	193.8	-0.2013545	193.8	-0.1715281	193.8	-0.1603748	193.8	-0.1336045	193.8	-0.09745589	193.8	-0.09364299	193.8	-0.1565797
194	1.099538	194	1.034514	194	1.096791	194	1.102658	194	1.07254	194	1.111629	194	1.144126	194	-0.1900208	194	-0.1677248	194	-0.1971683	194	-0.1683442	194	-0.160189	194	-0.1307604	194	-0.09695704	194	-0.1033446	194	-0.1563829
194.2	1.098851	194.2	1.028476	194.2	1.093841	194.2	1.098786	194.2	1.076073	194.2	1.11315	194.2	1.144198	194.2	-0.1917886	194.2	-0.1664815	194.2	-0.1997473	194.2	-0.1693487	194.2	-0.1626133	194.2	-0.1302797	194.2	-0.09577961	194.2	-0.09565642	194.2	-0.1543153
194.4	1.102022	194.4	1.030836	194.4	1.100061	194.4	1.104489	194.4	1.074538	194.4	1.112974	194.4	1.146446	194.4	-0.1877231	194.4	-0.1643612	194.4	-0.2025257	194.4	-0.1711722	194.4	-0.1629865	194.4	-0.1338237	194.4	-0.0917791	194.4	-0.09897776	194.4	-0.1613339
194.6	1.098902	194.6	1.0273	194.6	1.099233	194.6	1.095216	194.6	1.075735	194.6	1.106746	194.6	1.143683	194.6	-0.1868071	194.6	-0.1716432	194.6	-0.1969775	194.6	-0.1706909	194.6	-0.157779	194.6	-0.1309996	194.6	-0.0937114	194.6	-0.09878305	194.6	-0.1561574
194.8	1.098311	194.8	1.030726	194.8	1.101718	194.8	1.096736	194.8	1.076045	194.8	1.116956	194.8	1.140528	194.8	-0.1867644	194.8	-0.1715699	194.8	-0.195035	194.8	-0.168551	194.8	-0.160798	194.8	-0.1342436	194.8	-0.09389685	194.8	-0.09190205	194.8	-0.155578
195	1.101106	195	1.026573	195	1.0997	195	1.099897	195	1.07609	195	1.116867	195	1.145952	195	-0.1888406	195	-0.1682145	195	-0.1994006	195	-0.1728418	195	-0.157988	195	-0.1336588	195	-0.0934085	195	-0.09677391	195	-0.1570341
195.2	1.102782	195.2	1.030318	195.2	1.100754	195.2	1.099252	195.2	1.078033	195.2	1.112241	195.2	1.144915	195.2	-0.1924091	195.2	-0.1671441	195.2	-0.1965603	195.2	-0.169358	195.2	-0.1589671	195.2	-0.1297994	195.2	-0.09545325	195.2	-0.09672762	195.2	-0.1579898
195.4	1.098306	195.4	1.029698	195.4	1.10359	195.4	1.100535	195.4	1.078902	195.4	1.110141	195.4	1.142846	195.4	-0.1854738	195.4	-0.1692198	195.4	-0.2013223	195.4	-0.1698286	195.4	-0.1639735	195.4	-0.1326165	195.4	-0.09640497	195.4	-0.09919596	195.4	-0.1555386
195.6	1.096985	195.6	1.031548	195.6	1.09808	195.6	1.104985	195.6	1.078363	195.6	1.11645	195.6	1.142784	195.6	-0.1918343	195.6	-0.1660854	195.6	-0.1949863	195.6	-0.1694229	195.6	-0.1558203	195.6	-0.1366371	195.6	-0.09567576	195.6	-0.0940029	195.6	-0.1558478
195.8	1.102104	195.8	1.028066	195.8	1.097339	195.8	1.101195	195.8	1.076692	195.8	1.111479	195.8	1.144271	195.8	-0.1874365	195.8	-0.1676655	195.8	-0.1979465	195.8	-0.1705021	195.8	-0.1606135	195.8	-0.1335452	195.8	-0.09642255	195.8	-0.09196467	195.8	-0.1572171
196	1.104739	196	1.030304	196	1.100456	196	1.101439	196	1.077979	196	1.114163	196	1.142203	196	-0.1919852	196	-0.1679198	196	-0.19431	196	-0.1673952	196	-0.1579635	196	-0.1310877	196	-0.09372448	196	-0.09688617	196	-0.1511051
196.2	1.096687	196.2	1.02977	196.2	1.099492	196.2	1.102035	196.2	1.073383	196.2	1.11155	196.2	1.146096	196.2	-0.1877876	196.2	-0.1712924	196.2	-0.1975185	196.2	-0.1685232	196.2	-0.1635482	196.2	-0.1327717	196.2	-0.09142012	196.2	-0.09474588	196.2	-0.155286
196.4	1.103033	196.4	1.026901	196.4	1.10185	196.4	1.101496	196.4	1.076117	196.4	1.113328	196.4	1.14654	196.4	-0.1868442	196.4	-0.1651708	196.4	-0.1952879	196.4	-0.1693781	196.4	-0.1594274	196.4	-0.1291969	196.4	-0.0966709	196.4	-0.09010315	196.4	-0.1555203
196.6	1.102662	196.6	1.030318	196.6	1.103478	196.6	1.099145	196.6	1.077076	196.6	1.106028	196.6	1.143331	196.6	-0.1892219	196.6	-0.1665045	196.6	-0.196493	196.6	-0.1666064	196.6	-0.1609091	196.6	-0.1305193	196.6	-0.09085593	196.6	-0.09625525	196.6	-0.1563485
196.8	1.10383	196.8	1.03011	196.8	1.100067	196.8	1.100756	196.8	1.077912	196.8	1.111659	196.8	1.143632	196.8	-0.1894262	196.8	-0.1667244	196.8	-0.1966207	196.8	-0.1628907	196.8	-0.1625208	196.8	-0.1301651	196.8	-0.09005079	196.8	-0.1018806	196.8	-0.1563499
197	1.109169	197	1.033872	197	1.098007	197	1.102183	197	1.078175	197	1.113783	197	1.150967	197	-0.1854513	197	-0.1661788	197	-0.1968599	197	-0.1699343	197	-0.1592057	197	-0.1317072	197	-0.094497	197	-0.09591579	197	-0.1564873
197.2	1.10134	197.2	1.031263	197.2	1.098661	197.2	1.096048	197.2	1.074834	197.2	1.112232	197.2	1.148967	197.2	-0.1843464	197.2	-0.1652006	197.2	-0.1932417	197.2	-0.1677187	197.2	-0.1621302	197.2	-0.132809	197.2	-0.08997336	197.2	-0.09591561	197.2	-0.1520446
197.4	1.104333	197.4	1.029026	197.4	1.100496	197.4	1.104379	197.4	1.077769	197.4	1.112955	197.4	1.149503	197.4	-0.187014	197.4	-0.1644015	197.4	-0.1982493	197.4	-0.1654658	197.4	-0.156713	197.4	-0.1311651	197.4	-0.09271984	197.4	-0.0971651	197.4	-0.1540635
197.6	1.104788	197.6	1.033114	197.6	1.100793	197.6	1.103424	197.6	1.079332	197.6	1.113893	197.6	1.146196	197.6	-0.1870529	197.6	-0.163916	197.6	-0.1964381	197.6	-0.1640622	197.6	-0.1630486	197.6	-0.1241957	197.6	-0.09160541	197.6	-0.08981425	197.6	-0.1569474
197.8	1.099361	197.8	1.03024	197.8	1.100822	197.8	1.102156	197.8	1.081367	197.8	1.11456	197.8	1.143392	197.8	-0.1865456	197.8	-0.1654197	197.8	-0.1971437	197.8	-0.1690004	197.8	-0.15583	197.8	-0.1308446	197.8	-0.09193019	197.8	-0.09404128	197.8	-0.1542463
198	1.102574	198	1.031462	198	1.098274	198	1.100517	198	1.077197	198	1.1169	198	1.144848	198	-0.1874215	198	-0.1626611	198	-0.195764	198	-0.1640075	198	-0.1562973	198	-0.1278997	198	-0.09083895	198	-0.09403232	198	-0.1573405
198.2	1.100298	198.2	1.035659	198.2	1.105397	198.2	1.098923	198.2	1.073483	198.2	1.114666	198.2	1.145599	198.2	-0.1871377	198.2	-0.164406	198.2	-0.1933907	198.2	-0.1675072	198.2	-0.1548076	198.2	-0.1274953	198.2	-0.09087391	198.2	-0.08953053	198.2	-0.1544515
198.4	1.100083	198.4	1.031246	198.4	1.104581	198.4	1.102919	198.4	1.079331	198.4	1.116159	198.4	1.147081	198.4	-0.1867151	198.4	-0.1593988	198.4	-0.1967626	198.4	-0.1660457	198.4	-0.1610276	198.4	-0.1273201	198.4	-0.08933792	198.4	-0.09218822	198.4	-0.1517873
198.6	1.101646	198.6	1.033509	198.6	1.10509	198.6	1.103192	198.6	1.081128	198.6	1.117322	198.6	1.145661	198.6	-0.1873884	198.6	-0.1690669	198.6	-0.1928444	198.6	-0.1656151	198.6	-0.1587954	198.6	-0.1320238	198.6	-0.08927959	198.6	-0.09722003	198.6	-0.1539547
198.8	1.099896	198.8	1.035555	198.8	1.100267	198.8	1.104146	198.8	1.082011	198.8	1.112375	198.8	1.144095	198.8	-0.1823879	198.8	-0.1659828	198.8	-0.1963043	198.8	-0.1640232	198.8	-0.1546485	198.8	-0.1325843	198.8	-0.08902314	198.8	-0.09219196	198.8	-0.1536594
199	1.105253	199	1.034258	199	1.101617	199	1.103382	199	1.082276	199	1.116045	199	1.149547	199	-0.1833298	199	-0.1642847	199	-0.1962077	199	-0.1620714	199	-0.1541219	199	-0.128281	199	-0.08930428	199	-0.09479581	199	-0.1517871
199.2	1.10448	199.2	1.031913	199.2	1.103382	199.2	1.102705	199.2	1.076717	199.2	1.115758	199.2	1.14763	199.2	-0.1884174	199.2	-0.1637615	199.2	-0.1925436	199.2	-0.1665482	199.2	-0.1569182	199.2	-0.1331254	199.2	-0.08863916	199.2	-0.09268963	199.2	-0.1514143
199.4	1.102795	199.4	1.031555	199.4	1.100422	199.4	1.105847	199.4	1.079688	199.4	1.119645	199.4	1.151597	199.4	-0.1837888	199.4	-0.1623657	199.4	-0.1948424	199.4	-0.1645467	199.4	-0.1548624	199.4	-0.1327706	199.4	-0.09005857	199.4	-0.09212326	199.4	-0.1556518
199.6	1.107934	199.6	1.032939	199.6	1.10199	199.6	1.102826	199.6	1.081461	199.6	1.114478	199.6	1.14443	199.6	-0.1839909	199.6	-0.1605735	199.6	-0.1910439	199.6	-0.1656642	199.6	-0.1575719	199.6	-0.1287372	199.6	-0.09065972	199.6	-0.09397799	199.6	-0.1502908
199.8	1.10435	199.8	1.032282	199.8	1.100278	199.8	1.101901	199.8	1.078371	199.8	1.118663	199.8	1.147153	199.8	-0.1850007	199.8	-0.1611405	199.8	-0.1900035	199.8	-0.1616243	199.8	-0.1563291	199.8	-0.1285358	199.8	-0.08662327	199.8	-0.09022067	199.8	-0.1515453
200	1.115363	200	1.045758	200	1.116203	200	1.12184	200	1.098602	200	1.13929	200	1.164521	200	-0.1780495	200	-0.1524453	200	-0.1833122	200	-0.1522196	200	-0.1429641	200	-0.1269073	200	-0.07817056	200	-0.09073384	200	-0.149523
200.2	1.119985	200.2	1.047781	200.2	1.124431	200.2	1.12453	200.2	1.095629	200.2	1.135036	200.2	1.159118	200.2	-0.1686945	200.2	-0.154644	200.2	-0.1866996	200.2	-0.1541262	200.2	-0.1476128	200.2	-0.1198719	200.2	-0.07959606	200.2	-0.08665258	200.2	-0.1450402
200.4	1.121232	200.4	1.052769	200.4	1.121513	200.4	1.121708	200.4	1.097745	200.4	1.136753	200.4	1.161665	200.4	-0.1734702	200.4	-0.1521837	200.4	-0.182597	200.4	-0.1510887	200.4	-0.1494054	200.4	-0.1185492	200.4	-0.07708721	200.4	-0.08921028	200.4	-0.1497454
200.6	1.124232	200.6	1.047677	200.6	1.124551	200.6	1.125785	200.6	1.093498	200.6	1.14058	200.6	1.159261	200.6	-0.1689201	200.6	-0.1462849	200.6	-0.1805565	200.6	-0.1520713	200.6	-0.1475673	200.6	-0.1208724	200.6	-0.06919963	200.6	-0.08781806	200.6	-0.1474004
200.8	1.129894	200.8	1.050013	200.8	1.121594	200.8	1.125079	200.8	1.093109	200.8	1.136475	200.8	1.162957	200.8	-0.1773451	200.8	-0.1507196	200.8	-0.1812505	200.8	-0.1515505	200.8	-0.1428564	200.8	-0.1185739	200.8	-0.07369599	200.8	-0.09211363	200.8	-0.1505365
201	1.131143	201	1.051972	201	1.121056	201	1.123038	201	1.100036	201	1.133606	201	1.160732	201	-0.1714906	201	-0.1486528	201	-0.1782914	201	-0.1496907	201	-0.1431528	201	-0.117571	201	-0.07222754	201	-0.08426069	201	-0.1476391
201.2	1.128435	201.2	1.055846	201.2	1.121359	201.2	1.12711	201.2	1.100602	201.2	1.13379	201.2	1.160494	201.2	-0.1657858	201.2	-0.1499043	201.2	-0.1810666	201.2	-0.1477036	201.2	-0.1383547	201.2	-0.1176481	201.2	-0.07637497	201.2	-0.09159949	201.2	-0.1431537
201.4	1.13902	201.4	1.054649	201.4	1.127864	201.4	1.129768	201.4	1.092326	201.4	1.132341	201.4	1.162031	201.4	-0.1658628	201.4	-0.1547944	201.4	-0.179627	201.4	-0.1540464	201.4	-0.145527	201.4	-0.1197537	201.4	-0.07443417	201.4	-0.08772995	201.4	-0.1446028
201.6	1.14162	201.6	1.060266	201.6	1.121448	201.6	1.124981	201.6	1.095443	201.6	1.139473	201.6	1.159901	201.6	-0.1710097	201.6	-0.1497056	201.6	-0.1809106	201.6	-0.1523854	201.6	-0.144996	201.6	-0.118486	201.6	-0.07213416	201.6	-0.08479194	201.6	-0.1422623
201.8	1.147018	201.8	1.057664	201.8	1.126974	201.8	1.131213	201.8	1.101781	201.8	1.136912	201.8	1.161083	201.8	-0.1722388	201.8	-0.1512884	201.8	-0.1778933	201.8	-0.1485068	201.8	-0.1365261	201.8	-0.1189905	201.8	-0.07323688	201.8	-0.08854672	201.8	-0.139339
202	1.146018	202	1.057947	202	1.129303	202	1.127547	202	1.096685	202	1.135626	202	1.166653	202	-0.1663051	202	-0.1474	202	-0.1823929	202	-0.1510335	202	-0.139716	202	-0.1208107	202	-0.07499405	202	-0.08696892	202	-0.1378088
202.19	1.157707	202.19	1.055269	202.19	1.128655	202.19	1.127326	202.19	1.099539	202.19	1.138564	202.19	1.163367	202.19	-0.1687579	202.2	-0.1456146	202.2	-0.1825553	202.2	-0.1534417	202.2	-0.1387136	202.2	-0.1206478	202.2	-0.07233846	202.2	-0.08959473	202.2	-0.139265
202.4	1.161715	202.4	1.057256	202.4	1.128564	202.4	1.131442	202.4	1.098947	202.4	1.140952	202.4	1.16476	202.4	-0.1673881	202.4	-0.1460302	202.4	-0.1776623	202.4	-0.148889	202.4	-0.1423606	202.4	-0.1173482	202.4	-0.07604092	202.4	-0.08773625	202.4	-0.1399856
202.6	1.15767	202.6	1.05758	202.6	1.131755	202.6	1.131061	202.6	1.102628	202.6	1.139295	202.6	1.165001	202.6	-0.1656546	202.6	-0.1496709	202.6	-0.1791397	202.6	-0.1510654	202.6	-0.1399723	202.6	-0.1211729	202.6	-0.07595424	202.6	-0.08453003	202.6	-0.1421732
202.79	1.160468	202.79	1.064541	202.79	1.129	202.79	1.128368	202.79	1.098723	202.79	1.139769	202.79	1.163395	202.79	-0.1650136	202.8	-0.1462512	202.8	-0.1724139	202.8	-0.1439766	202.8	-0.1392919	202.8	-0.120873	202.8	-0.07460176	202.8	-0.08866149	202.8	-0.138755
203	1.16088	203	1.064203	203	1.134592	203	1.13184	203	1.099394	203	1.14337	203	1.16599	203	-0.1720309	203	-0.1438802	203	-0.179554	203	-0.1474838	203	-0.1391401	203	-0.1134625	203	-0.0779248	203	-0.08626327	203	-0.1400697
203.2	1.165423	203.2	1.065107	203.2	1.128551	203.2	1.133317	203.2	1.103952	203.2	1.141247	203.2	1.163712	203.2	-0.1665952	203.2	-0.1473591	203.2	-0.1815502	203.2	-0.1452706	203.2	-0.140323	203.2	-0.1203934	203.2	-0.07364196	203.2	-0.08406718	203.2	-0.1399123
203.4	1.168708	203.4	1.066806	203.4	1.136824	203.4	1.1327	203.4	1.100167	203.4	1.136148	203.4	1.161828	203.4	-0.1654459	203.4	-0.1444312	203.4	-0.1763012	203.4	-0.1492889	203.4	-0.1401014	203.4	-0.1111075	203.4	-0.07400272	203.4	-0.08276782	203.4	-0.1380569
203.6	1.167022	203.6	1.065751	203.6	1.13195	203.6	1.132596	203.6	1.103385	203.6	1.137706	203.6	1.164276	203.6	-0.1645362	203.6	-0.1438109	203.6	-0.1822912	203.6	-0.1519946	203.6	-0.1387055	203.6	-0.1148531	203.6	-0.07478422	203.6	-0.08486785	203.6	-0.1400179
203.8	1.167524	203.8	1.066851	203.8	1.136767	203.8	1.136037	203.8	1.101291	203.8	1.136913	203.8	1.168437	203.8	-0.1640422	203.8	-0.1494075	203.8	-0.1746877	203.8	-0.149822	203.8	-0.1458323	203.8	-0.1121254	203.8	-0.06897364	203.8	-0.08552143	203.8	-0.1349654
204	1.166155	204	1.07157	204	1.140671	204	1.134349	204	1.104563	204	1.140696	204	1.162568	204	-0.1624872	204	-0.1509328	204	-0.1786603	204	-0.1472071	204	-0.1429798	204	-0.117491	204	-0.06984452	204	-0.08335981	204	-0.1372584
204.2	1.171951	204.2	1.074193	204.2	1.135926	204.2	1.135059	204.2	1.101217	204.2	1.139471	204.2	1.159731	204.2	-0.157904	204.2	-0.1458863	204.2	-0.1740077	204.2	-0.1506518	204.2	-0.1405829	204.2	-0.1157483	204.2	-0.07461369	204.2	-0.08320385	204.2	-0.1347566
204.4	1.172973	204.4	1.067686	204.4	1.133048	204.4	1.135873	204.4	1.100752	204.4	1.141187	204.4	1.163449	204.4	-0.1670752	204.4	-0.147177	204.4	-0.17926	204.4	-0.1469635	204.4	-0.1384253	204.4	-0.1101388	204.4	-0.07357318	204.4	-0.08437218	204.4	-0.1399684
204.6	1.179237	204.6	1.076319	204.6	1.136014	204.6	1.13406	204.6	1.102769	204.6	1.136477	204.6	1.1648	204.6	-0.1626112	204.6	-0.1426303	204.6	-0.1800324	204.6	-0.1505997	204.6	-0.1345646	204.6	-0.1125299	204.6	-0.07460705	204.6	-0.07868274	204.6	-0.1330768
204.8	1.183628	204.8	1.07605	204.8	1.139931	204.8	1.134424	204.8	1.103945	204.8	1.145512	204.8	1.16285	204.8	-0.1620689	204.8	-0.1456011	204.8	-0.1773555	204.8	-0.1466931	204.8	-0.1383254	204.8	-0.1143043	204.8	-0.07101569	204.8	-0.07774654	204.8	-0.1337567
205	1.187091	205	1.082785	205	1.142214	205	1.135932	205	1.102585	205	1.139949	205	1.169247	205	-0.1614436	205	-0.1499188	205	-0.1826384	205	-0.1472806	205	-0.1411651	205	-0.1147034	205	-0.0700792	205	-0.08449163	205	-0.1364483
205.2	1.188171	205.2	1.07879	205.2	1.143613	205.2	1.13056	205.2	1.101897	205.2	1.139331	205.2	1.165367	205.2	-0.164295	205.2	-0.1448377	205.2	-0.1805144	205.2	-0.1475834	205.2	-0.1422034	205.2	-0.1167825	205.2	-0.07143106	205.2	-0.08042302	205.2	-0.1352887
205.39	1.193666	205.39	1.085967	205.39	1.141268	205.39	1.136418	205.39	1.103293	205.39	1.134417	205.39	1.164786	205.39	-0.163247	205.4	-0.1471927	205.4	-0.1786734	205.4	-0.1497669	205.4	-0.1361848	205.4	-0.1159094	205.4	-0.06909717	205.4	-0.08265293	205.4	-0.1402401
205.6	1.193097	205.6	1.084331	205.6	1.146465	205.6	1.134242	205.6	1.102394	205.6	1.140847	205.6	1.166343	205.6	-0.1681377	205.6	-0.146495	205.6	-0.1788526	205.6	-0.1487983	205.6	-0.1398945	205.6	-0.1133538	205.6	-0.07240875	205.6	-0.0840716	205.6	-0.13963
205.8	1.194654	205.8	1.085968	205.8	1.140864	205.8	1.137702	205.8	1.10868	205.8	1.143254	205.8	1.162875	205.8	-0.1662056	205.8	-0.1419714	205.8	-0.1774682	205.8	-0.1477495	205.8	-0.1417685	205.8	-0.1151355	205.8	-0.0685184	205.8	-0.08190818	205.8	-0.1339307
206	1.202943	206	1.084293	206	1.145763	206	1.135232	206	1.109227	206	1.138435	206	1.16256	206	-0.1661129	206	-0.1469259	206	-0.1834227	206	-0.1490518	206	-0.1370074	206	-0.1204516	206	-0.0764664	206	-0.08449984	206	-0.1368085
206.2	1.201747	206.2	1.086891	206.2	1.147269	206.2	1.140259	206.2	1.107406	206.2	1.138724	206.2	1.163698	206.2	-0.1625174	206.2	-0.1429545	206.2	-0.1768315	206.2	-0.1522415	206.2	-0.1418144	206.2	-0.1149744	206.2	-0.07471886	206.2	-0.08550912	206.2	-0.1300463
206.4	1.202883	206.4	1.087972	206.4	1.145924	206.4	1.140835	206.4	1.107922	206.4	1.137333	206.4	1.162652	206.4	-0.1605926	206.4	-0.1473155	206.4	-0.1739297	206.4	-0.1457905	206.4	-0.139153	206.4	-0.1201691	206.4	-0.07494615	206.4	-0.08235522	206.4	-0.1354929
206.6	1.203073	206.6	1.089654	206.6	1.145825	206.6	1.137743	206.6	1.109195	206.6	1.14103	206.6	1.162246	206.6	-0.1600186	206.6	-0.1427815	206.6	-0.1762047	206.6	-0.1431273	206.6	-0.1398731	206.6	-0.1139808	206.6	-0.06752599	206.6	-0.08344852	206.6	-0.1347193
206.79	1.204297	206.79	1.088555	206.79	1.150218	206.79	1.137963	206.79	1.105368	206.79	1.143684	206.79	1.169073	206.79	-0.1680232	206.8	-0.1480362	206.8	-0.176425	206.8	-0.141965	206.8	-0.1362427	206.8	-0.1142055	206.8	-0.07262075	206.8	-0.08680701	206.8	-0.1341652
207	1.203529	207	1.090058	207	1.150982	207	1.135355	207	1.109709	207	1.140382	207	1.167242	207	-0.1625586	207	-0.1411981	207	-0.1796134	207	-0.1468776	207	-0.1408462	207	-0.1142725	207	-0.07106885	207	-0.0777286	207	-0.1339896
207.19	1.207341	207.19	1.092381	207.19	1.148882	207.19	1.143703	207.19	1.108415	207.19	1.141572	207.19	1.167428	207.19	-0.1611257	207.2	-0.146572	207.2	-0.1744978	207.2	-0.1447889	207.2	-0.1374023	207.2	-0.1114144	207.2	-0.07229424	207.2	-0.08520004	207.2	-0.1392845
207.39	1.20897	207.39	1.096023	207.39	1.146813	207.39	1.138359	207.39	1.111012	207.39	1.14315	207.39	1.161304	207.39	-0.1649925	207.4	-0.1409332	207.4	-0.1796654	207.4	-0.1457971	207.4	-0.1385203	207.4	-0.1171416	207.4	-0.07283964	207.4	-0.08346267	207.4	-0.1351981
207.6	1.209772	207.6	1.09355	207.6	1.153959	207.6	1.144287	207.6	1.106351	207.6	1.144572	207.6	1.168104	207.6	-0.1655993	207.6	-0.1418768	207.6	-0.1798885	207.6	-0.1442051	207.6	-0.1368692	207.6	-0.1135732	207.6	-0.07452115	207.6	-0.0839783	207.6	-0.1369573
207.8	1.211057	207.8	1.100007	207.8	1.153687	207.8	1.141359	207.8	1.108826	207.8	1.142116	207.8	1.171743	207.8	-0.1635719	207.8	-0.1437461	207.8	-0.1796375	207.8	-0.1466499	207.8	-0.1377951	207.8	-0.1146532	207.8	-0.06432691	207.8	-0.07817511	207.8	-0.1329647
207.99	1.214054	207.99	1.093911	207.99	1.149928	207.99	1.142366	207.99	1.10875	207.99	1.144256	207.99	1.168439	207.99	-0.1618349	208	-0.1444834	208	-0.1786781	208	-0.1490331	208	-0.1389626	208	-0.1154092	208	-0.0755587	208	-0.07825487	208	-0.1336978
208.19	1.220767	208.19	1.093342	208.19	1.155613	208.19	1.145176	208.19	1.109708	208.19	1.142398	208.19	1.172427	208.19	-0.1628911	208.2	-0.1475527	208.2	-0.17813	208.2	-0.1462985	208.2	-0.1378432	208.2	-0.1138225	208.2	-0.06905209	208.2	-0.07816358	208.2	-0.1321349
208.39	1.224762	208.39	1.10158	208.39	1.16001	208.39	1.141914	208.39	1.113018	208.39	1.138537	208.39	1.17372	208.39	-0.1632416	208.4	-0.1344649	208.4	-0.1753667	208.4	-0.144873	208.4	-0.1361392	208.4	-0.1137152	208.4	-0.06910829	208.4	-0.08037544	208.4	-0.1316936
208.6	1.226537	208.6	1.102111	208.6	1.159676	208.6	1.141768	208.6	1.111742	208.6	1.146255	208.6	1.165453	208.6	-0.1614525	208.6	-0.1430251	208.6	-0.181812	208.6	-0.1480876	208.6	-0.1361679	208.6	-0.1161863	208.6	-0.07051856	208.6	-0.07774349	208.6	-0.1305178
208.79	1.22788	208.79	1.101217	208.79	1.157536	208.79	1.14369	208.79	1.107518	208.79	1.139954	208.79	1.164988	208.79	-0.1605966	208.8	-0.1414979	208.8	-0.1764511	208.8	-0.1465112	208.8	-0.1332014	208.8	-0.1161314	208.8	-0.06718035	208.8	-0.08365897	208.8	-0.1370002
209	1.225815	209	1.107325	209	1.157959	209	1.148249	209	1.106228	209	1.144546	209	1.166492	209	-0.1630329	209	-0.1449057	209	-0.1756985	209	-0.1464268	209	-0.1385314	209	-0.1137784	209	-0.06711504	209	-0.07879006	209	-0.1288016
209.2	1.231951	209.2	1.106015	209.2	1.160478	209.2	1.14726	209.2	1.105791	209.2	1.138304	209.2	1.162632	209.2	-0.1661539	209.2	-0.1437607	209.2	-0.1733169	209.2	-0.1461397	209.2	-0.1362	209.2	-0.1087136	209.2	-0.0732125	209.2	-0.08161091	209.2	-0.1275631
209.4	1.231878	209.4	1.109437	209.4	1.160447	209.4	1.139338	209.4	1.110759	209.4	1.142165	209.4	1.167818	209.4	-0.1661174	209.4	-0.1417399	209.4	-0.1772377	209.4	-0.1428516	209.4	-0.1372615	209.4	-0.1133559	209.4	-0.06992919	209.4	-0.07642681	209.4	-0.1313623
209.59	1.234685	209.59	1.108441	209.59	1.162553	209.59	1.147411	209.59	1.111304	209.59	1.138066	209.59	1.169526	209.59	-0.1596147	209.6	-0.1444239	209.6	-0.1793753	209.6	-0.1464733	209.6	-0.1362049	209.6	-0.1089194	209.6	-0.06947067	209.6	-0.08184801	209.6	-0.1313377
209.79	1.236626	209.79	1.111754	209.79	1.163584	209.79	1.143606	209.79	1.112297	209.79	1.142341	209.79	1.169	209.79	-0.1550209	209.8	-0.135445	209.8	-0.1742957	209.8	-0.1412978	209.8	-0.1351048	209.8	-0.1073734	209.8	-0.06815182	209.8	-0.08641146	209.8	-0.1322789
209.99	1.237135	209.99	1.109748	209.99	1.165728	209.99	1.150693	209.99	1.113388	209.99	1.141019	209.99	1.168118	209.99	-0.1596625	210	-0.1461644	210	-0.1744002	210	-0.1403134	210	-0.1362639	210	-0.1103231	210	-0.07246681	210	-0.07998139	210	-0.1318819
210.2	1.235053	210.2	1.105509	210.2	1.165915	210.2	1.148538	210.2	1.112264	210.2	1.146122	210.2	1.16498	210.2	-0.1621612	210.2	-0.1345289	210.2	-0.1737674	210.2	-0.1474793	210.2	-0.134086	210.2	-0.1078252	210.2	-0.06851656	210.2	-0.08076921	210.2	-0.1285959
210.39	1.238866	210.39	1.119114	210.39	1.165121	210.39	1.149268	210.39	1.11331	210.39	1.146379	210.39	1.173023	210.39	-0.1617662	210.4	-0.1395408	210.4	-0.1764651	210.4	-0.1456654	210.4	-0.1351023	210.4	-0.111053	210.4	-0.06672104	210.4	-0.07781976	210.4	-0.1285525
210.6	1.239383	210.6	1.113998	210.6	1.166879	210.6	1.147949	210.6	1.115796	210.6	1.144124	210.6	1.172805	210.6	-0.1606786	210.6	-0.1382104	210.6	-0.1754642	210.6	-0.1425834	210.6	-0.1346145	210.6	-0.1121465	210.6	-0.06504078	210.6	-0.07566058	210.6	-0.1335633
210.8	1.24095	210.8	1.112705	210.8	1.16677	210.8	1.148333	210.8	1.110471	210.8	1.146375	210.8	1.171204	210.8	-0.1592464	210.8	-0.1479945	210.8	-0.174232	210.8	-0.141019	210.8	-0.1358065	210.8	-0.1096708	210.8	-0.07234147	210.8	-0.07944052	210.8	-0.1330459
210.99	1.244691	210.99	1.113775	210.99	1.168242	210.99	1.151842	210.99	1.113511	210.99	1.149002	210.99	1.168208	210.99	-0.1602427	211	-0.1423038	211	-0.1746387	211	-0.1449175	211	-0.13125	211	-0.1115504	211	-0.07435499	211	-0.0805162	211	-0.132371
211.19	1.239642	211.19	1.117571	211.19	1.165259	211.19	1.151238	211.19	1.117162	211.19	1.145408	211.19	1.168289	211.19	-0.1607322	211.2	-0.1406176	211.2	-0.1716544	211.2	-0.1461513	211.2	-0.1331189	211.2	-0.1113802	211.2	-0.06772374	211.2	-0.07753429	211.2	-0.1323294
211.4	1.242869	211.4	1.118441	211.4	1.172537	211.4	1.150155	211.4	1.115779	211.4	1.145508	211.4	1.170473	211.4	-0.1592244	211.4	-0.1459326	211.4	-0.1775226	211.4	-0.1432813	211.4	-0.132391	211.4	-0.1115402	211.4	-0.06741748	211.4	-0.08000363	211.4	-0.1300307
211.59	1.247354	211.59	1.122021	211.59	1.173742	211.59	1.153371	211.59	1.119141	211.59	1.147143	211.59	1.169346	211.59	-0.1585491	211.6	-0.139215	211.6	-0.1747179	211.6	-0.1461603	211.6	-0.1351492	211.6	-0.1108482	211.6	-0.07427771	211.6	-0.08368552	211.6	-0.1296944
211.8	1.249568	211.8	1.12299	211.8	1.169638	211.8	1.152937	211.8	1.119725	211.8	1.144064	211.8	1.170542	211.8	-0.1595421	211.8	-0.1419729	211.8	-0.1697535	211.8	-0.1442038	211.8	-0.1341805	211.8	-0.1139904	211.8	-0.06634229	211.8	-0.07367098	211.8	-0.1313791
212	1.25029	212	1.116227	212	1.175003	212	1.152535	212	1.110734	212	1.147606	212	1.170997	212	-0.1588403	212	-0.1382079	212	-0.1803826	212	-0.1418207	212	-0.1316575	212	-0.1137384	212	-0.06652543	212	-0.07775564	212	-0.1284373
212.2	1.254976	212.2	1.125377	212.2	1.173496	212.2	1.153762	212.2	1.114148	212.2	1.142875	212.2	1.171492	212.2	-0.1577918	212.2	-0.1396301	212.2	-0.1697521	212.2	-0.1405298	212.2	-0.1351449	212.2	-0.1102226	212.2	-0.06743556	212.2	-0.07746364	212.2	-0.1295441
212.39	1.255476	212.39	1.129689	212.39	1.171902	212.39	1.154439	212.39	1.111135	212.39	1.143325	212.39	1.168478	212.39	-0.1559654	212.4	-0.1379961	212.4	-0.1677688	212.4	-0.1391682	212.4	-0.1350575	212.4	-0.1050135	212.4	-0.06878744	212.4	-0.0769381	212.4	-0.1308113
212.59	1.256835	212.59	1.122654	212.59	1.17728	212.59	1.158486	212.59	1.118008	212.59	1.145578	212.59	1.166236	212.59	-0.1605766	212.6	-0.1428002	212.6	-0.168448	212.6	-0.1401821	212.6	-0.1362658	212.6	-0.1110197	212.6	-0.07107051	212.6	-0.0781223	212.6	-0.1264638
212.79	1.264999	212.79	1.127081	212.79	1.177028	212.79	1.156729	212.79	1.110142	212.79	1.145039	212.79	1.172926	212.79	-0.1605074	212.8	-0.1393268	212.8	-0.1712833	212.8	-0.1394619	212.8	-0.1327991	212.8	-0.1130324	212.8	-0.06738687	212.8	-0.07879955	212.8	-0.1320999
212.99	1.263069	212.99	1.127602	212.99	1.181697	212.99	1.156076	212.99	1.117871	212.99	1.146601	212.99	1.165551	212.99	-0.1587594	213	-0.136486	213	-0.1739589	213	-0.1406092	213	-0.1326108	213	-0.1085256	213	-0.06791475	213	-0.0748985	213	-0.1309488
213.19	1.264642	213.19	1.132224	213.19	1.178516	213.19	1.151433	213.19	1.116604	213.19	1.146365	213.19	1.173446	213.19	-0.163147	213.2	-0.1405565	213.2	-0.1704791	213.2	-0.1421433	213.2	-0.1341857	213.2	-0.1104573	213.2	-0.06745203	213.2	-0.07728074	213.2	-0.1254822
213.4	1.266036	213.4	1.130645	213.4	1.174325	213.4	1.155853	213.4	1.118389	213.4	1.144855	213.4	1.171529	213.4	-0.1589566	213.4	-0.1374542	213.4	-0.1741396	213.4	-0.1432222	213.4	-0.1294593	213.4	-0.1049433	213.4	-0.06250105	213.4	-0.07610289	213.4	-0.1311248
213.59	1.266633	213.59	1.132307	213.59	1.179032	213.59	1.152912	213.59	1.11702	213.59	1.14641	213.59	1.169933	213.59	-0.1602473	213.6	-0.1337899	213.6	-0.1754477	213.6	-0.1401099	213.6	-0.1353178	213.6	-0.1105036	213.6	-0.06603102	213.6	-0.07640374	213.6	-0.1301527
213.8	1.261671	213.8	1.132134	213.8	1.180854	213.8	1.158504	213.8	1.114761	213.8	1.148595	213.8	1.1704	213.8	-0.158834	213.8	-0.1398961	213.8	-0.1756149	213.8	-0.1407212	213.8	-0.1301083	213.8	-0.1090877	213.8	-0.068505	213.8	-0.07505877	213.8	-0.130294
214	1.266297	214	1.135223	214	1.182175	214	1.162434	214	1.121464	214	1.145622	214	1.17088	214	-0.1542504	214	-0.1368651	214	-0.1709557	214	-0.1426184	214	-0.1318437	214	-0.1100008	214	-0.06544013	214	-0.07759743	214	-0.1298011
214.19	1.269699	214.19	1.134461	214.19	1.178177	214.19	1.155918	214.19	1.11645	214.19	1.148989	214.19	1.175096	214.19	-0.1609202	214.2	-0.1379503	214.2	-0.1715841	214.2	-0.143652	214.2	-0.1304731	214.2	-0.106497	214.2	-0.06492001	214.2	-0.07693616	214.2	-0.1303494
214.39	1.272793	214.39	1.136955	214.39	1.185225	214.39	1.152057	214.39	1.120861	214.39	1.147497	214.39	1.17429	214.39	-0.1587318	214.4	-0.1388325	214.4	-0.168789	214.4	-0.1412622	214.4	-0.1357012	214.4	-0.1079531	214.4	-0.06568555	214.4	-0.07313215	214.4	-0.1309923
214.59	1.273621	214.59	1.140088	214.59	1.183961	214.59	1.15811	214.59	1.119416	214.59	1.150262	214.59	1.17269	214.59	-0.1605902	214.6	-0.1361717	214.6	-0.1722964	214.6	-0.1382113	214.6	-0.1306705	214.6	-0.1051778	214.6	-0.066962	214.6	-0.07641629	214.6	-0.1263651
214.79	1.271856	214.79	1.135154	214.79	1.179675	214.79	1.159374	214.79	1.126143	214.79	1.150743	214.79	1.168529	214.79	-0.165544	214.8	-0.1314576	214.8	-0.1667143	214.8	-0.1441043	214.8	-0.1337306	214.8	-0.106068	214.8	-0.07298701	214.8	-0.07179786	214.8	-0.1310631
215	1.275286	215	1.139358	215	1.183952	215	1.161561	215	1.124988	215	1.149119	215	1.170966	215	-0.1545331	215	-0.1391272	215	-0.1701534	215	-0.1437704	215	-0.1265543	215	-0.1038764	215	-0.06790505	215	-0.07366301	215	-0.1295449
215.19	1.278504	215.19	1.138761	215.19	1.184026	215.19	1.15822	215.19	1.120957	215.19	1.150313	215.19	1.176497	215.19	-0.1573821	215.2	-0.1343128	215.2	-0.1713498	215.2	-0.1380577	215.2	-0.1314684	215.2	-0.1033886	215.2	-0.07165269	215.2	-0.07764602	215.2	-0.1267385
215.39	1.277212	215.39	1.136121	215.39	1.187573	215.39	1.150365	215.39	1.119307	215.39	1.156529	215.39	1.170416	215.39	-0.1559258	215.4	-0.1448256	215.4	-0.1732902	215.4	-0.1391954	215.4	-0.1368693	215.4	-0.1104369	215.4	-0.06569066	215.4	-0.07602643	215.4	-0.1286849
215.59	1.273299	215.59	1.144184	215.59	1.185889	215.59	1.160201	215.59	1.123893	215.59	1.146727	215.59	1.172838	215.59	-0.1542233	215.6	-0.1351837	215.6	-0.1696519	215.6	-0.1368121	215.6	-0.127393	215.6	-0.107068	215.6	-0.06450249	215.6	-0.07516482	215.6	-0.1251689
215.8	1.280469	215.8	1.137505	215.8	1.18756	215.8	1.163868	215.8	1.124372	215.8	1.14932	215.8	1.173594	215.8	-0.1588107	215.8	-0.1379979	215.8	-0.1707902	215.8	-0.1402054	215.8	-0.1280778	215.8	-0.1076596	215.8	-0.0637674	215.8	-0.07757258	215.8	-0.1251189
216	1.281231	216	1.144615	216	1.189787	216	1.166446	216	1.120762	216	1.151916	216	1.170503	216	-0.1561799	216	-0.1366799	216	-0.1719489	216	-0.1396355	216	-0.1312968	216	-0.1066026	216	-0.06336204	216	-0.07968597	216	-0.1288163
216.19	1.2847	216.19	1.14343	216.19	1.191612	216.19	1.164409	216.19	1.11875	216.19	1.150286	216.19	1.174024	216.19	-0.1590994	216.2	-0.1392401	216.2	-0.1707643	216.2	-0.1421441	216.2	-0.1312468	216.2	-0.1031913	216.2	-0.0689455	216.2	-0.07230583	216.2	-0.1257332
216.39	1.284189	216.39	1.141989	216.39	1.187307	216.39	1.167283	216.39	1.120279	216.39	1.14881	216.39	1.171415	216.39	-0.1553026	216.4	-0.1387468	216.4	-0.169814	216.4	-0.1386324	216.4	-0.1305706	216.4	-0.1044509	216.4	-0.06918672	216.4	-0.07421921	216.4	-0.1250642
216.59	1.285045	216.59	1.149133	216.59	1.195326	216.59	1.164175	216.59	1.12151	216.59	1.143821	216.59	1.173272	216.59	-0.1618973	216.6	-0.1379978	216.6	-0.1674835	216.6	-0.1377563	216.6	-0.1332536	216.6	-0.1036558	216.6	-0.06439139	216.6	-0.06860658	216.6	-0.1253498
216.8	1.289135	216.8	1.149346	216.8	1.191414	216.8	1.159142	216.8	1.125147	216.8	1.151728	216.8	1.174148	216.8	-0.1554315	216.8	-0.1360379	216.8	-0.1702434	216.8	-0.13894	216.8	-0.1275379	216.8	-0.1070357	216.8	-0.06144311	216.8	-0.07410967	216.8	-0.1275186
216.99	1.286885	216.99	1.149778	216.99	1.190858	216.99	1.168069	216.99	1.125284	216.99	1.151029	216.99	1.174994	216.99	-0.1545714	217	-0.1337682	217	-0.1700606	217	-0.1363106	217	-0.1340955	217	-0.1050636	217	-0.0672226	217	-0.07721782	217	-0.12667
217.19	1.294029	217.19	1.149151	217.19	1.200327	217.19	1.159761	217.19	1.128575	217.19	1.151947	217.19	1.177537	217.19	-0.1545877	217.2	-0.1347893	217.2	-0.1695745	217.2	-0.139581	217.2	-0.130524	217.2	-0.1030842	217.2	-0.06469905	217.2	-0.07427555	217.2	-0.1279957
217.39	1.295305	217.39	1.149379	217.39	1.197701	217.39	1.16367	217.39	1.128779	217.39	1.148924	217.39	1.171926	217.39	-0.1596064	217.4	-0.1387257	217.4	-0.1682373	217.4	-0.136299	217.4	-0.133646	217.4	-0.1052644	217.4	-0.06360698	217.4	-0.07392311	217.4	-0.1258359
217.59	1.291971	217.59	1.152248	217.59	1.19353	217.59	1.167579	217.59	1.123675	217.59	1.151804	217.59	1.177916	217.59	-0.1566061	217.6	-0.133554	217.6	-0.1694954	217.6	-0.1414433	217.6	-0.1262608	217.6	-0.1066525	217.6	-0.06352668	217.6	-0.0777288	217.6	-0.1264621
217.79	1.291987	217.79	1.148142	217.79	1.199199	217.79	1.168105	217.79	1.125884	217.79	1.149733	217.79	1.17325	217.79	-0.1542618	217.8	-0.1379042	217.8	-0.1708143	217.8	-0.140056	217.8	-0.1277442	217.8	-0.1071661	217.8	-0.06483909	217.8	-0.07227597	217.8	-0.1268098
217.99	1.293943	217.99	1.15817	217.99	1.198473	217.99	1.168318	217.99	1.130487	217.99	1.15026	217.99	1.177325	217.99	-0.1522667	218	-0.1388074	218	-0.1702707	218	-0.138039	218	-0.127837	218	-0.1086845	218	-0.06420587	218	-0.07620968	218	-0.1260264
218.2	1.291433	218.2	1.157627	218.2	1.195383	218.2	1.170279	218.2	1.12795	218.2	1.150333	218.2	1.174337	218.2	-0.1559754	218.2	-0.1354636	218.2	-0.1668151	218.2	-0.1346093	218.2	-0.1285664	218.2	-0.101578	218.2	-0.06258911	218.2	-0.07481671	218.2	-0.1243135
218.39	1.295475	218.39	1.153605	218.39	1.194	218.39	1.171164	218.39	1.126132	218.39	1.151593	218.39	1.178728	218.39	-0.1578839	218.4	-0.1339385	218.4	-0.1703855	218.4	-0.1350253	218.4	-0.1306906	218.4	-0.1068343	218.4	-0.06300455	218.4	-0.07231842	218.4	-0.128682
218.59	1.294259	218.59	1.156376	218.59	1.198548	218.59	1.170382	218.59	1.131954	218.59	1.149513	218.59	1.175892	218.59	-0.1546206	218.6	-0.1319374	218.6	-0.1666052	218.6	-0.1391846	218.6	-0.1297849	218.6	-0.1046388	218.6	-0.06286053	218.6	-0.07281837	218.6	-0.1252448
218.8	1.294508	218.8	1.155362	218.8	1.199844	218.8	1.168294	218.8	1.126102	218.8	1.155985	218.8	1.175559	218.8	-0.1590203	218.8	-0.136108	218.8	-0.1678904	218.8	-0.1375177	218.8	-0.1275214	218.8	-0.1034233	218.8	-0.06577624	218.8	-0.07612019	218.8	-0.1263796
219	1.295013	219	1.156228	219	1.20055	219	1.165525	219	1.126239	219	1.149919	219	1.179168	219	-0.1532823	219	-0.1309484	219	-0.1681619	219	-0.1360747	219	-0.1255713	219	-0.1045669	219	-0.06392828	219	-0.07285693	219	-0.123201
219.19	1.293	219.19	1.159685	219.19	1.203398	219.19	1.166887	219.19	1.130708	219.19	1.153703	219.19	1.176043	219.19	-0.1561768	219.2	-0.1378466	219.2	-0.166276	219.2	-0.141019	219.2	-0.1364537	219.2	-0.1023275	219.2	-0.06142048	219.2	-0.07015874	219.2	-0.1320469
219.4	1.3026	219.4	1.158104	219.4	1.200038	219.4	1.170778	219.4	1.129392	219.4	1.155714	219.4	1.179243	219.4	-0.1625899	219.4	-0.1333317	219.4	-0.1696893	219.4	-0.1370683	219.4	-0.1306982	219.4	-0.1049549	219.4	-0.06097835	219.4	-0.06863203	219.4	-0.1258915
219.59	1.304284	219.59	1.163094	219.59	1.207092	219.59	1.171947	219.59	1.130515	219.59	1.156737	219.59	1.176095	219.59	-0.1591094	219.6	-0.1338423	219.6	-0.167556	219.6	-0.1403315	219.6	-0.1288827	219.6	-0.1004758	219.6	-0.06288952	219.6	-0.07319911	219.6	-0.1267763
219.79	1.303205	219.79	1.162208	219.79	1.201838	219.79	1.170045	219.79	1.128465	219.79	1.151869	219.79	1.17516	219.79	-0.1554849	219.8	-0.1352412	219.8	-0.1672312	219.8	-0.1371172	219.8	-0.1329538	219.8	-0.1083065	219.8	-0.0627346	219.8	-0.08137354	219.8	-0.1248319
219.99	1.309144	219.99	1.160835	219.99	1.204532	219.99	1.171994	219.99	1.130819	219.99	1.152894	219.99	1.176779	219.99	-0.1528284	220	-0.1348048	220	-0.1678683	220	-0.1387866	220	-0.1335134	220	-0.1028798	220	-0.06264708	220	-0.0727639	220	-0.1265394
220.19	1.308734	220.19	1.165469	220.19	1.207972	220.19	1.168691	220.19	1.1323	220.19	1.152291	220.19	1.179692	220.19	-0.1551832	220.2	-0.1360902	220.2	-0.1706513	220.2	-0.1392112	220.2	-0.1285593	220.2	-0.1085226	220.2	-0.0630679	220.2	-0.0707398	220.2	-0.1276148
220.39	1.304162	220.39	1.166739	220.39	1.206918	220.39	1.17319	220.39	1.127641	220.39	1.153961	220.39	1.181185	220.39	-0.1549596	220.4	-0.1323525	220.4	-0.1669022	220.4	-0.1383842	220.4	-0.1311262	220.4	-0.1031477	220.4	-0.06230929	220.4	-0.07476332	220.4	-0.1204082
220.59	1.307844	220.59	1.166179	220.59	1.210541	220.59	1.171759	220.59	1.127314	220.59	1.15571	220.59	1.170977	220.59	-0.1518888	220.6	-0.1342613	220.6	-0.1654727	220.6	-0.1295169	220.6	-0.1221205	220.6	-0.1054669	220.6	-0.06276427	220.6	-0.07047758	220.6	-0.1249072
220.79	1.307919	220.79	1.166999	220.79	1.209787	220.79	1.174976	220.79	1.129301	220.79	1.155459	220.79	1.182379	220.79	-0.1554862	220.8	-0.1323709	220.8	-0.1650891	220.8	-0.1359306	220.8	-0.1291765	220.8	-0.1045901	220.8	-0.06315114	220.8	-0.07039917	220.8	-0.124603
220.99	1.308689	220.99	1.168314	220.99	1.208578	220.99	1.172942	220.99	1.122886	220.99	1.15698	220.99	1.182002	220.99	-0.154648	221	-0.130101	221	-0.1680628	221	-0.1344921	221	-0.1259843	221	-0.1025602	221	-0.06713536	221	-0.07393859	221	-0.1216709
221.19	1.317013	221.19	1.167683	221.19	1.207351	221.19	1.177975	221.19	1.129778	221.19	1.153459	221.19	1.174793	221.19	-0.149694	221.2	-0.136421	221.2	-0.1686725	221.2	-0.1327211	221.2	-0.1281338	221.2	-0.1035574	221.2	-0.06429885	221.2	-0.07563592	221.2	-0.1240874
221.4	1.315318	221.4	1.170069	221.4	1.209879	221.4	1.17538	221.4	1.134779	221.4	1.157316	221.4	1.175437	221.4	-0.1508584	221.4	-0.1341045	221.4	-0.17225	221.4	-0.1347827	221.4	-0.123309	221.4	-0.1021205	221.4	-0.06325731	221.4	-0.06874046	221.4	-0.1228629
221.6	1.313591	221.6	1.172474	221.6	1.212441	221.6	1.179416	221.6	1.131259	221.6	1.15777	221.6	1.175018	221.6	-0.1526051	221.6	-0.135074	221.6	-0.1681331	221.6	-0.1372179	221.6	-0.1227249	221.6	-0.106292	221.6	-0.06167623	221.6	-0.07196731	221.6	-0.1216188
221.8	1.310447	221.8	1.170529	221.8	1.212691	221.8	1.180426	221.8	1.132664	221.8	1.156436	221.8	1.17613	221.8	-0.1533461	221.8	-0.1327263	221.8	-0.171426	221.8	-0.1346131	221.8	-0.1251022	221.8	-0.1070707	221.8	-0.06149584	221.8	-0.06858188	221.8	-0.1259911
222	1.308989	222	1.170891	222	1.21417	222	1.177074	222	1.131249	222	1.153004	222	1.178586	222	-0.1541537	222	-0.133918	222	-0.1675794	222	-0.1368314	222	-0.1253218	222	-0.1039746	222	-0.06337033	222	-0.06639898	222	-0.1220185
222.2	1.315016	222.2	1.171858	222.2	1.212667	222.2	1.181207	222.2	1.129476	222.2	1.15582	222.2	1.181034	222.2	-0.1515559	222.2	-0.1304934	222.2	-0.1649274	222.2	-0.1336009	222.2	-0.125674	222.2	-0.1054352	222.2	-0.05997489	222.2	-0.07139947	222.2	-0.1262421
222.4	1.315145	222.4	1.176002	222.4	1.212205	222.4	1.180673	222.4	1.132574	222.4	1.160805	222.4	1.180484	222.4	-0.1524582	222.4	-0.1355763	222.4	-0.1668098	222.4	-0.1318487	222.4	-0.1285289	222.4	-0.1043738	222.4	-0.06499495	222.4	-0.07067445	222.4	-0.1195608
222.6	1.31697	222.6	1.179486	222.6	1.211405	222.6	1.177554	222.6	1.131476	222.6	1.155425	222.6	1.183396	222.6	-0.1527797	222.6	-0.1339549	222.6	-0.1690802	222.6	-0.1349472	222.6	-0.1311508	222.6	-0.09870367	222.6	-0.06526919	222.6	-0.06993466	222.6	-0.1258913
222.8	1.315718	222.8	1.176862	222.8	1.212846	222.8	1.181693	222.8	1.137891	222.8	1.158444	222.8	1.176016	222.8	-0.1536847	222.8	-0.1352075	222.8	-0.1689893	222.8	-0.1317465	222.8	-0.1228746	222.8	-0.1019819	222.8	-0.06203991	222.8	-0.0739568	222.8	-0.1199851
223	1.322613	223	1.175783	223	1.214152	223	1.181269	223	1.135139	223	1.161349	223	1.182834	223	-0.1500123	223	-0.1256856	223	-0.1671785	223	-0.1335907	223	-0.128953	223	-0.09723466	223	-0.05781753	223	-0.06983978	223	-0.1220609
223.2	1.316705	223.2	1.176084	223.2	1.215826	223.2	1.181039	223.2	1.138252	223.2	1.15928	223.2	1.179608	223.2	-0.1481206	223.2	-0.1355335	223.2	-0.1684526	223.2	-0.1323073	223.2	-0.1231283	223.2	-0.1036987	223.2	-0.06387955	223.2	-0.07112551	223.2	-0.1269859
223.4	1.323432	223.4	1.17624	223.4	1.214059	223.4	1.178423	223.4	1.137633	223.4	1.159779	223.4	1.183345	223.4	-0.1527074	223.4	-0.131744	223.4	-0.1640228	223.4	-0.130401	223.4	-0.1266175	223.4	-0.1006166	223.4	-0.06368098	223.4	-0.06242143	223.4	-0.1239274
223.6	1.324177	223.6	1.177646	223.6	1.216678	223.6	1.175699	223.6	1.139814	223.6	1.1593	223.6	1.182266	223.6	-0.1501481	223.6	-0.1302529	223.6	-0.1642671	223.6	-0.131036	223.6	-0.1237282	223.6	-0.1042008	223.6	-0.06336471	223.6	-0.07393663	223.6	-0.1251205
223.8	1.323366	223.8	1.177292	223.8	1.217505	223.8	1.180619	223.8	1.13748	223.8	1.1622	223.8	1.179252	223.8	-0.1489192	223.8	-0.1313339	223.8	-0.167826	223.8	-0.1315789	223.8	-0.1208112	223.8	-0.09994692	223.8	-0.06129492	223.8	-0.07010897	223.8	-0.127671
224	1.321739	224	1.180017	224	1.219332	224	1.18215	224	1.135294	224	1.15769	224	1.180315	224	-0.1524344	224	-0.1345799	224	-0.164244	224	-0.1352799	224	-0.1272237	224	-0.1049198	224	-0.05543698	224	-0.0683144	224	-0.1231703
224.2	1.326079	224.2	1.181594	224.2	1.224736	224.2	1.18163	224.2	1.137946	224.2	1.156401	224.2	1.18249	224.2	-0.1526387	224.2	-0.1327654	224.2	-0.1718788	224.2	-0.133269	224.2	-0.1266216	224.2	-0.09823894	224.2	-0.05980643	224.2	-0.07149068	224.2	-0.1217095
224.4	1.328887	224.4	1.183374	224.4	1.215212	224.4	1.181269	224.4	1.138109	224.4	1.15984	224.4	1.183089	224.4	-0.1528019	224.4	-0.1316816	224.4	-0.1683775	224.4	-0.1320782	224.4	-0.1253402	224.4	-0.1015333	224.4	-0.06354704	224.4	-0.06997897	224.4	-0.1209468
224.61	1.331256	224.61	1.186043	224.61	1.225715	224.61	1.177796	224.61	1.136071	224.61	1.161289	224.61	1.177755	224.61	-0.1490133	224.6	-0.1300469	224.6	-0.1601146	224.6	-0.1341084	224.6	-0.1224605	224.6	-0.1051706	224.6	-0.05928588	224.6	-0.07329371	224.6	-0.1238538
224.8	1.327056	224.8	1.181093	224.8	1.223258	224.8	1.181787	224.8	1.136041	224.8	1.158545	224.8	1.186181	224.8	-0.1530904	224.8	-0.1322884	224.8	-0.1677397	224.8	-0.1346803	224.8	-0.125947	224.8	-0.1009469	224.8	-0.06227581	224.8	-0.06910823	224.8	-0.1237243
225	1.331442	225	1.183895	225	1.222206	225	1.178481	225	1.139684	225	1.163779	225	1.181234	225	-0.1552467	225	-0.1337061	225	-0.1682018	225	-0.1382061	225	-0.1282162	225	-0.1038826	225	-0.05607632	225	-0.07429519	225	-0.1230389
225.2	1.329104	225.2	1.185323	225.2	1.225224	225.2	1.18504	225.2	1.134886	225.2	1.160738	225.2	1.178162	225.2	-0.1468423	225.2	-0.133406	225.2	-0.1690156	225.2	-0.1343632	225.2	-0.125376	225.2	-0.1010526	225.2	-0.05825767	225.2	-0.0685848	225.2	-0.1233622
225.4	1.333935	225.4	1.191573	225.4	1.229177	225.4	1.185544	225.4	1.135979	225.4	1.161607	225.4	1.177785	225.4	-0.1502588	225.4	-0.1315149	225.4	-0.1633002	225.4	-0.1303311	225.4	-0.1299017	225.4	-0.09947575	225.4	-0.06149598	225.4	-0.07288311	225.4	-0.1235437
225.6	1.33001	225.6	1.190946	225.6	1.22283	225.6	1.182821	225.6	1.137325	225.6	1.160754	225.6	1.178922	225.6	-0.1541384	225.6	-0.1246964	225.6	-0.169202	225.6	-0.1280187	225.6	-0.122606	225.6	-0.1033695	225.6	-0.0608871	225.6	-0.06331502	225.6	-0.120677
225.8	1.331242	225.8	1.188075	225.8	1.224728	225.8	1.186158	225.8	1.136714	225.8	1.158642	225.8	1.183491	225.8	-0.1476914	225.8	-0.1312642	225.8	-0.1670287	225.8	-0.1332788	225.8	-0.1244645	225.8	-0.09962938	225.8	-0.05894685	225.8	-0.06886264	225.8	-0.1231149
226	1.333017	226	1.187218	226	1.229228	226	1.182719	226	1.137788	226	1.165248	226	1.178956	226	-0.1506406	226	-0.1289727	226	-0.1624628	226	-0.1298097	226	-0.1176377	226	-0.1016282	226	-0.06182267	226	-0.06584828	226	-0.1186707
226.2	1.336115	226.2	1.189488	226.2	1.226865	226.2	1.187982	226.2	1.137398	226.2	1.163487	226.2	1.184318	226.2	-0.1511728	226.2	-0.1296187	226.2	-0.1616229	226.2	-0.1327413	226.2	-0.1275152	226.2	-0.09986069	226.2	-0.05747155	226.2	-0.06793071	226.2	-0.1230657
226.4	1.337604	226.4	1.18663	226.4	1.22602	226.4	1.18746	226.4	1.1373	226.4	1.163333	226.4	1.185446	226.4	-0.14749	226.4	-0.1303877	226.4	-0.1672903	226.4	-0.1322811	226.4	-0.1234014	226.4	-0.1030509	226.4	-0.06256629	226.4	-0.06983084	226.4	-0.1168814
226.6	1.339835	226.6	1.194872	226.6	1.231667	226.6	1.18794	226.6	1.134937	226.6	1.164839	226.6	1.184436	226.6	-0.1492914	226.6	-0.128968	226.6	-0.1608703	226.6	-0.1319498	226.6	-0.1261811	226.6	-0.1033097	226.6	-0.06017715	226.6	-0.06874158	226.6	-0.1189509
226.8	1.335743	226.8	1.188452	226.8	1.229193	226.8	1.187061	226.8	1.138897	226.8	1.161648	226.8	1.182564	226.8	-0.1549573	226.8	-0.1269729	226.8	-0.1599998	226.8	-0.1307765	226.8	-0.1231602	226.8	-0.09762321	226.8	-0.05738126	226.8	-0.06697904	226.8	-0.1214533
227	1.336113	227	1.193294	227	1.230722	227	1.188126	227	1.143498	227	1.158394	227	1.181907	227	-0.1544318	227	-0.1292648	227	-0.1649041	227	-0.131581	227	-0.1185079	227	-0.102515	227	-0.05839539	227	-0.07144524	227	-0.1219806
227.2	1.344181	227.2	1.19665	227.2	1.22888	227.2	1.190815	227.2	1.140543	227.2	1.166175	227.2	1.181241	227.2	-0.1500548	227.2	-0.1300456	227.2	-0.1608677	227.2	-0.1328767	227.2	-0.1260167	227.2	-0.1018735	227.2	-0.06258976	227.2	-0.06964093	227.2	-0.1187394
227.4	1.341668	227.4	1.191537	227.4	1.234063	227.4	1.190891	227.4	1.138728	227.4	1.164149	227.4	1.181638	227.4	-0.1488658	227.4	-0.1294904	227.4	-0.1684337	227.4	-0.1316128	227.4	-0.124182	227.4	-0.1022658	227.4	-0.06239626	227.4	-0.07394005	227.4	-0.1187495
227.6	1.338132	227.6	1.195992	227.6	1.235868	227.6	1.189201	227.6	1.137702	227.6	1.165174	227.6	1.185281	227.6	-0.1538826	227.6	-0.1307305	227.6	-0.1625727	227.6	-0.1268541	227.6	-0.1239775	227.6	-0.1023761	227.6	-0.05768951	227.6	-0.06517008	227.6	-0.1221775
227.79	1.342105	227.79	1.196064	227.79	1.233782	227.79	1.192233	227.79	1.139698	227.79	1.165141	227.79	1.179691	227.79	-0.1510927	227.8	-0.1267326	227.8	-0.1596714	227.8	-0.135391	227.8	-0.1217711	227.8	-0.09727998	227.8	-0.05906275	227.8	-0.06879537	227.8	-0.1168273
228	1.343665	228	1.196288	228	1.230434	228	1.190362	228	1.141229	228	1.164186	228	1.184648	228	-0.1456097	228	-0.1274758	228	-0.1641904	228	-0.1352734	228	-0.1258329	228	-0.09594532	228	-0.05797923	228	-0.06775388	228	-0.1160867
228.19	1.341997	228.19	1.199951	228.19	1.231364	228.19	1.192216	228.19	1.146944	228.19	1.165405	228.19	1.185914	228.19	-0.1440815	228.2	-0.1295301	228.2	-0.1644496	228.2	-0.1250287	228.2	-0.124834	228.2	-0.1003526	228.2	-0.06223014	228.2	-0.06896421	228.2	-0.115819
228.4	1.34193	228.4	1.198457	228.4	1.235614	228.4	1.192687	228.4	1.138736	228.4	1.160584	228.4	1.185258	228.4	-0.1502179	228.4	-0.1300121	228.4	-0.1649999	228.4	-0.1289564	228.4	-0.122893	228.4	-0.09850127	228.4	-0.05934155	228.4	-0.06173463	228.4	-0.1169405
228.6	1.346245	228.6	1.197383	228.6	1.234208	228.6	1.197737	228.6	1.139626	228.6	1.158229	228.6	1.183579	228.6	-0.1489791	228.6	-0.1283121	228.6	-0.1639318	228.6	-0.1312026	228.6	-0.1203015	228.6	-0.09981281	228.6	-0.06036171	228.6	-0.0698356	228.6	-0.1210197
228.8	1.348901	228.8	1.19824	228.8	1.237858	228.8	1.192756	228.8	1.142489	228.8	1.162027	228.8	1.184124	228.8	-0.1506815	228.8	-0.1308665	228.8	-0.1638794	228.8	-0.1268197	228.8	-0.1247077	228.8	-0.1009649	228.8	-0.05904078	228.8	-0.06509232	228.8	-0.117887
229	1.34841	229	1.200101	229	1.234706	229	1.195616	229	1.146513	229	1.162397	229	1.190286	229	-0.1507724	229	-0.1303377	229	-0.1636172	229	-0.1316223	229	-0.1262151	229	-0.1016578	229	-0.05728122	229	-0.06615524	229	-0.1227842
229.19	1.346432	229.19	1.199811	229.19	1.235812	229.19	1.197991	229.19	1.143067	229.19	1.166473	229.19	1.182115	229.19	-0.1509009	229.2	-0.1249117	229.2	-0.1677728	229.2	-0.12794	229.2	-0.1243382	229.2	-0.09660428	229.2	-0.05898271	229.2	-0.06508579	229.2	-0.1156284
229.4	1.350287	229.4	1.202403	229.4	1.23878	229.4	1.191733	229.4	1.144312	229.4	1.162661	229.4	1.18575	229.4	-0.1508305	229.4	-0.1316085	229.4	-0.1625225	229.4	-0.1285048	229.4	-0.1248562	229.4	-0.09768274	229.4	-0.05768536	229.4	-0.06167507	229.4	-0.117154
229.6	1.352779	229.6	1.202962	229.6	1.240142	229.6	1.191942	229.6	1.146221	229.6	1.164242	229.6	1.184554	229.6	-0.1496511	229.6	-0.1282341	229.6	-0.1615109	229.6	-0.132126	229.6	-0.1210418	229.6	-0.09894398	229.6	-0.05750179	229.6	-0.06576429	229.6	-0.1198336
229.79	1.354179	229.79	1.197114	229.79	1.24237	229.79	1.196076	229.79	1.146282	229.79	1.166749	229.79	1.188155	229.79	-0.1450669	229.8	-0.1279163	229.8	-0.1582019	229.8	-0.1321687	229.8	-0.1189827	229.8	-0.09699094	229.8	-0.05963071	229.8	-0.06560466	229.8	-0.1214438
230	1.349433	230	1.204472	230	1.236257	230	1.192493	230	1.145733	230	1.164899	230	1.183569	230	-0.1492931	230	-0.1312075	230	-0.1617351	230	-0.1309472	230	-0.1183723	230	-0.1011398	230	-0.0598925	230	-0.0678131	230	-0.1227822
230.2	1.347196	230.2	1.208648	230.2	1.237303	230.2	1.19246	230.2	1.150403	230.2	1.169937	230.2	1.183603	230.2	-0.1466499	230.2	-0.128014	230.2	-0.158427	230.2	-0.1276793	230.2	-0.1204556	230.2	-0.09864259	230.2	-0.05313515	230.2	-0.07027251	230.2	-0.1232227
230.39	1.357191	230.39	1.204925	230.39	1.238416	230.39	1.194759	230.39	1.148459	230.39	1.167328	230.39	1.186237	230.39	-0.1491137	230.4	-0.1319278	230.4	-0.1640718	230.4	-0.1314636	230.4	-0.1258041	230.4	-0.1001505	230.4	-0.05839033	230.4	-0.06502036	230.4	-0.1211741
230.59	1.356837	230.59	1.203273	230.59	1.240811	230.59	1.196297	230.59	1.147567	230.59	1.165499	230.59	1.187487	230.59	-0.1485912	230.6	-0.1260756	230.6	-0.1614742	230.6	-0.1299852	230.6	-0.1165804	230.6	-0.09666637	230.6	-0.05081288	230.6	-0.07121745	230.6	-0.1180293
230.8	1.353363	230.8	1.202559	230.8	1.241601	230.8	1.198077	230.8	1.151291	230.8	1.166678	230.8	1.186963	230.8	-0.1505712	230.8	-0.122971	230.8	-0.1643955	230.8	-0.1248113	230.8	-0.1199823	230.8	-0.1000019	230.8	-0.05648948	230.8	-0.06783565	230.8	-0.1231893
230.99	1.357582	230.99	1.207237	230.99	1.241726	230.99	1.200302	230.99	1.149559	230.99	1.168333	230.99	1.184819	230.99	-0.1538772	231	-0.1297203	231	-0.1606853	231	-0.1257178	231	-0.1203641	231	-0.0963474	231	-0.05715899	231	-0.07045158	231	-0.116872
231.2	1.357586	231.2	1.210889	231.2	1.241925	231.2	1.196478	231.2	1.152416	231.2	1.1658	231.2	1.190335	231.2	-0.1483894	231.2	-0.1240324	231.2	-0.1605759	231.2	-0.1261923	231.2	-0.1206879	231.2	-0.09553578	231.2	-0.05663103	231.2	-0.06727469	231.2	-0.1184893
231.39	1.355394	231.39	1.209516	231.39	1.245286	231.39	1.1998	231.39	1.142868	231.39	1.171601	231.39	1.190749	231.39	-0.146817	231.4	-0.1272773	231.4	-0.1653555	231.4	-0.1246897	231.4	-0.1228462	231.4	-0.1001215	231.4	-0.05694623	231.4	-0.06575876	231.4	-0.1142657
231.6	1.363869	231.6	1.209817	231.6	1.24789	231.6	1.195985	231.6	1.140427	231.6	1.170155	231.6	1.1892	231.6	-0.1466609	231.6	-0.1277163	231.6	-0.1614727	231.6	-0.1287225	231.6	-0.1171258	231.6	-0.09434363	231.6	-0.05792604	231.6	-0.06664192	231.6	-0.1207795
231.8	1.361227	231.8	1.212668	231.8	1.248464	231.8	1.195228	231.8	1.15083	231.8	1.169418	231.8	1.19339	231.8	-0.1483033	231.8	-0.1247237	231.8	-0.1602201	231.8	-0.1280569	231.8	-0.1194247	231.8	-0.09683704	231.8	-0.05667917	231.8	-0.06158031	231.8	-0.1186766
232	1.35949	232	1.205439	232	1.23829	232	1.195916	232	1.149562	232	1.167765	232	1.18353	232	-0.1480328	232	-0.1244838	232	-0.1618769	232	-0.129624	232	-0.1213254	232	-0.09728154	232	-0.05348272	232	-0.06653211	232	-0.1190813
232.19	1.363131	232.19	1.210002	232.19	1.243515	232.19	1.19874	232.19	1.145227	232.19	1.168123	232.19	1.189494	232.19	-0.1491851	232.2	-0.130005	232.2	-0.1613509	232.2	-0.1281279	232.2	-0.120667	232.2	-0.09773713	232.2	-0.05640707	232.2	-0.06161225	232.2	-0.121173
232.39	1.364285	232.39	1.213026	232.39	1.249157	232.39	1.197444	232.39	1.149582	232.39	1.166246	232.39	1.187746	232.39	-0.1476494	232.4	-0.1246495	232.4	-0.15962	232.4	-0.131929	232.4	-0.118573	232.4	-0.09924124	232.4	-0.05626274	232.4	-0.06458053	232.4	-0.1201794
232.6	1.367359	232.6	1.21105	232.6	1.247016	232.6	1.198631	232.6	1.152267	232.6	1.17023	232.6	1.186367	232.6	-0.1497072	232.6	-0.1282723	232.6	-0.164576	232.6	-0.1247667	232.6	-0.1191228	232.6	-0.09430604	232.6	-0.05503781	232.6	-0.06420554	232.6	-0.1214694
232.79	1.363005	232.79	1.210994	232.79	1.247031	232.79	1.201952	232.79	1.148097	232.79	1.172087	232.79	1.187998	232.79	-0.1494474	232.8	-0.1265505	232.8	-0.1623569	232.8	-0.1263665	232.8	-0.1183265	232.8	-0.09584319	232.8	-0.05796827	232.8	-0.06363817	232.8	-0.1171019
232.99	1.365644	232.99	1.217358	232.99	1.250035	232.99	1.19808	232.99	1.149932	232.99	1.167	232.99	1.186015	232.99	-0.1425466	233	-0.1248225	233	-0.156114	233	-0.1271124	233	-0.1216711	233	-0.09727061	233	-0.05871994	233	-0.06741114	233	-0.1180093
233.19	1.36662	233.19	1.215584	233.19	1.249085	233.19	1.207454	233.19	1.153056	233.19	1.16574	233.19	1.189764	233.19	-0.1491932	233.2	-0.1268426	233.2	-0.164712	233.2	-0.1241732	233.2	-0.1181121	233.2	-0.09767391	233.2	-0.05390953	233.2	-0.06754804	233.2	-0.1150095
233.4	1.36682	233.4	1.215719	233.4	1.250289	233.4	1.201966	233.4	1.149512	233.4	1.169714	233.4	1.189357	233.4	-0.149945	233.4	-0.1282327	233.4	-0.161964	233.4	-0.1231401	233.4	-0.1175985	233.4	-0.09413709	233.4	-0.05732974	233.4	-0.06744034	233.4	-0.1174836
233.59	1.369015	233.59	1.214152	233.59	1.250937	233.59	1.202428	233.59	1.147622	233.59	1.169021	233.59	1.191528	233.59	-0.148396	233.6	-0.1254378	233.6	-0.1612495	233.6	-0.1259999	233.6	-0.1180438	233.6	-0.09540361	233.6	-0.05612817	233.6	-0.06462695	233.6	-0.1184871
233.8	1.368371	233.8	1.217806	233.8	1.249618	233.8	1.202992	233.8	1.153507	233.8	1.168051	233.8	1.189402	233.8	-0.1516692	233.8	-0.1228848	233.8	-0.1589228	233.8	-0.1286727	233.8	-0.1200217	233.8	-0.1002458	233.8	-0.05645633	233.8	-0.06495463	233.8	-0.1219311
233.99	1.369263	233.99	1.215327	233.99	1.253039	233.99	1.201851	233.99	1.154891	233.99	1.171344	233.99	1.187165	233.99	-0.1469183	234	-0.1203914	234	-0.1574978	234	-0.1255907	234	-0.1221068	234	-0.09895761	234	-0.05487906	234	-0.06845383	234	-0.1184255
234.19	1.372227	234.19	1.217148	234.19	1.253007	234.19	1.207534	234.19	1.151779	234.19	1.172343	234.19	1.186642	234.19	-0.1445468	234.2	-0.127725	234.2	-0.1579229	234.2	-0.1293452	234.2	-0.1166496	234.2	-0.09497647	234.2	-0.05738043	234.2	-0.06571949	234.2	-0.1162756
234.4	1.368549	234.4	1.215432	234.4	1.253275	234.4	1.202266	234.4	1.150368	234.4	1.168647	234.4	1.193097	234.4	-0.1451014	234.4	-0.1253727	234.4	-0.1598442	234.4	-0.1234479	234.4	-0.1213955	234.4	-0.100612	234.4	-0.05822733	234.4	-0.06393759	234.4	-0.1142927
234.59	1.366517	234.59	1.217717	234.59	1.250621	234.59	1.208157	234.59	1.1555	234.59	1.172189	234.59	1.188321	234.59	-0.1484725	234.6	-0.1239169	234.6	-0.1619197	234.6	-0.1269732	234.6	-0.1190299	234.6	-0.09276962	234.6	-0.05900348	234.6	-0.06573707	234.6	-0.1151213
234.8	1.373282	234.8	1.220808	234.8	1.252002	234.8	1.204718	234.8	1.154963	234.8	1.173517	234.8	1.187048	234.8	-0.1469689	234.8	-0.1228873	234.8	-0.1594862	234.8	-0.1291432	234.8	-0.117858	234.8	-0.08998242	234.8	-0.0548946	234.8	-0.0631953	234.8	-0.1200559
234.99	1.366496	234.99	1.223793	234.99	1.25459	234.99	1.205867	234.99	1.157627	234.99	1.171803	234.99	1.18769	234.99	-0.1428521	235	-0.1251133	235	-0.1619938	235	-0.1237123	235	-0.1139661	235	-0.09544373	235	-0.05529277	235	-0.05887835	235	-0.1151665
235.19	1.373398	235.19	1.219699	235.19	1.253029	235.19	1.203294	235.19	1.157799	235.19	1.172242	235.19	1.191138	235.19	-0.1429562	235.2	-0.126124	235.2	-0.1582103	235.2	-0.1256732	235.2	-0.1162381	235.2	-0.09825114	235.2	-0.05597702	235.2	-0.06679054	235.2	-0.1156609
235.4	1.375037	235.4	1.2221	235.4	1.252566	235.4	1.209577	235.4	1.155921	235.4	1.175218	235.4	1.18968	235.4	-0.1500645	235.4	-0.1259521	235.4	-0.1569256	235.4	-0.1272977	235.4	-0.1182414	235.4	-0.09686249	235.4	-0.05686016	235.4	-0.06639969	235.4	-0.120866
235.59	1.37059	235.59	1.217989	235.59	1.256136	235.59	1.205126	235.59	1.150792	235.59	1.17452	235.59	1.190875	235.59	-0.1416881	235.6	-0.1252712	235.6	-0.1595256	235.6	-0.1295067	235.6	-0.1155811	235.6	-0.09278515	235.6	-0.05679364	235.6	-0.06261671	235.6	-0.1165923
235.79	1.372915	235.79	1.224828	235.79	1.260165	235.79	1.201614	235.79	1.153633	235.79	1.170776	235.79	1.192418	235.79	-0.1476142	235.8	-0.1198216	235.8	-0.1579797	235.8	-0.1260375	235.8	-0.1166472	235.8	-0.09460828	235.8	-0.04972553	235.8	-0.06229804	235.8	-0.1182624
235.99	1.376638	235.99	1.222284	235.99	1.255289	235.99	1.204159	235.99	1.153382	235.99	1.172755	235.99	1.192911	235.99	-0.1458251	236	-0.1224439	236	-0.1590159	236	-0.1260879	236	-0.1181256	236	-0.09897463	236	-0.0518012	236	-0.06044022	236	-0.116163
236.2	1.372357	236.2	1.222239	236.2	1.257646	236.2	1.205918	236.2	1.154914	236.2	1.173136	236.2	1.186697	236.2	-0.1412928	236.2	-0.1254011	236.2	-0.1614248	236.2	-0.1211887	236.2	-0.1174774	236.2	-0.09528401	236.2	-0.05437981	236.2	-0.05892409	236.2	-0.1185377
236.39	1.375621	236.39	1.229885	236.39	1.259062	236.39	1.209617	236.39	1.151129	236.39	1.174552	236.39	1.193541	236.39	-0.1442007	236.4	-0.1239132	236.4	-0.1596352	236.4	-0.1242065	236.4	-0.1161394	236.4	-0.09156943	236.4	-0.05506264	236.4	-0.05884178	236.4	-0.1150787
236.59	1.373767	236.59	1.223934	236.59	1.262488	236.59	1.205543	236.59	1.159604	236.59	1.178429	236.59	1.193321	236.59	-0.1420671	236.6	-0.1221021	236.6	-0.158453	236.6	-0.1199728	236.6	-0.1170271	236.6	-0.09380107	236.6	-0.05598281	236.6	-0.06230756	236.6	-0.1212656
236.79	1.378673	236.79	1.227204	236.79	1.259291	236.79	1.208614	236.79	1.154166	236.79	1.170897	236.79	1.193008	236.79	-0.148801	236.8	-0.1206263	236.8	-0.1619983	236.8	-0.1244288	236.8	-0.1210933	236.8	-0.09184235	236.8	-0.05689618	236.8	-0.06263678	236.8	-0.1180909
236.99	1.38019	236.99	1.22688	236.99	1.263462	236.99	1.210626	236.99	1.158335	236.99	1.169951	236.99	1.194657	236.99	-0.1442301	237	-0.1266142	237	-0.157956	237	-0.1264342	237	-0.1161781	237	-0.09268978	237	-0.05728628	237	-0.05849009	237	-0.1140879
237.19	1.384993	237.19	1.231748	237.19	1.259236	237.19	1.206184	237.19	1.1544	237.19	1.174244	237.19	1.190058	237.19	-0.1433816	237.2	-0.1249479	237.2	-0.1584743	237.2	-0.1245711	237.2	-0.1198261	237.2	-0.09190137	237.2	-0.05008937	237.2	-0.06708811	237.2	-0.1172161
237.39	1.378676	237.39	1.231217	237.39	1.258039	237.39	1.213239	237.39	1.160318	237.39	1.174177	237.39	1.19547	237.39	-0.1455538	237.4	-0.1239347	237.4	-0.1602743	237.4	-0.1208073	237.4	-0.1137526	237.4	-0.09594667	237.4	-0.05192057	237.4	-0.06908203	237.4	-0.1153268
237.59	1.382972	237.59	1.228438	237.59	1.263766	237.59	1.213588	237.59	1.157556	237.59	1.174172	237.59	1.197567	237.59	-0.1424064	237.6	-0.1200513	237.6	-0.1625593	237.6	-0.1237859	237.6	-0.1177581	237.6	-0.09094118	237.6	-0.04999473	237.6	-0.06176168	237.6	-0.1098704
237.79	1.381425	237.79	1.229194	237.79	1.265334	237.79	1.212565	237.79	1.153055	237.79	1.173411	237.79	1.189694	237.79	-0.1423844	237.8	-0.1248669	237.8	-0.1546625	237.8	-0.1236303	237.8	-0.1184029	237.8	-0.09627604	237.8	-0.05460422	237.8	-0.06299999	237.8	-0.1140257
237.99	1.384129	237.99	1.233349	237.99	1.267672	237.99	1.210658	237.99	1.152788	237.99	1.170638	237.99	1.193079	237.99	-0.1419094	238	-0.1221373	238	-0.1560617	238	-0.1290667	238	-0.1147299	238	-0.09860612	238	-0.05172798	238	-0.06433075	238	-0.113945
238.19	1.381174	238.19	1.229294	238.19	1.261793	238.19	1.214973	238.19	1.158661	238.19	1.176084	238.19	1.196171	238.19	-0.1464285	238.2	-0.1217409	238.2	-0.1628424	238.2	-0.1225787	238.2	-0.1176177	238.2	-0.09337116	238.2	-0.05517627	238.2	-0.06264583	238.2	-0.114878
238.39	1.383644	238.39	1.228645	238.39	1.26627	238.39	1.211571	238.39	1.15999	238.39	1.172865	238.39	1.190449	238.39	-0.1450788	238.4	-0.123046	238.4	-0.1572244	238.4	-0.1205035	238.4	-0.1126034	238.4	-0.09056078	238.4	-0.05297345	238.4	-0.06385726	238.4	-0.1125835
238.6	1.382339	238.6	1.228223	238.6	1.269639	238.6	1.214404	238.6	1.16218	238.6	1.17522	238.6	1.18926	238.6	-0.1430335	238.6	-0.1234186	238.6	-0.1558442	238.6	-0.1186775	238.6	-0.1177177	238.6	-0.09795051	238.6	-0.05256015	238.6	-0.0602327	238.6	-0.1122936
238.8	1.377975	238.8	1.232224	238.8	1.261757	238.8	1.216468	238.8	1.157441	238.8	1.173597	238.8	1.194471	238.8	-0.1378217	238.8	-0.1198601	238.8	-0.1608958	238.8	-0.1210922	238.8	-0.1154017	238.8	-0.09349665	238.8	-0.05405388	238.8	-0.05970076	238.8	-0.1137075
238.99	1.385081	238.99	1.238523	238.99	1.260966	238.99	1.209032	238.99	1.164272	238.99	1.176139	238.99	1.191033	238.99	-0.1458944	239	-0.1272828	239	-0.1578742	239	-0.1233703	239	-0.1134161	239	-0.09316729	239	-0.05673118	239	-0.06125874	239	-0.1138692
239.19	1.391205	239.19	1.232121	239.19	1.266622	239.19	1.215715	239.19	1.157735	239.19	1.180197	239.19	1.195924	239.19	-0.1447164	239.2	-0.1214054	239.2	-0.1568058	239.2	-0.1257578	239.2	-0.1182314	239.2	-0.09021983	239.2	-0.05470213	239.2	-0.05990122	239.2	-0.1131395
239.39	1.391114	239.39	1.236948	239.39	1.265847	239.39	1.213153	239.39	1.161926	239.39	1.176678	239.39	1.188727	239.39	-0.1463424	239.4	-0.1232418	239.4	-0.1558394	239.4	-0.1243946	239.4	-0.11746	239.4	-0.09577223	239.4	-0.05378153	239.4	-0.06095174	239.4	-0.1126659
239.6	1.38305	239.6	1.238063	239.6	1.269492	239.6	1.213693	239.6	1.16075	239.6	1.173989	239.6	1.195321	239.6	-0.1455444	239.6	-0.1205378	239.6	-0.1575169	239.6	-0.1211886	239.6	-0.1150558	239.6	-0.08713906	239.6	-0.05498577	239.6	-0.0608923	239.6	-0.1133054
239.8	1.38887	239.8	1.235963	239.8	1.266605	239.8	1.21606	239.8	1.15994	239.8	1.175085	239.8	1.192374	239.8	-0.1404776	239.8	-0.1216725	239.8	-0.1524568	239.8	-0.1201531	239.8	-0.1174866	239.8	-0.09497965	239.8	-0.05345435	239.8	-0.05939702	239.8	-0.1136808
239.99	1.390904	239.99	1.238062	239.99	1.266949	239.99	1.215908	239.99	1.16513	239.99	1.178123	239.99	1.198459	239.99	-0.1427111	240	-0.1255178	240	-0.1624004	240	-0.1269598	240	-0.1168172	240	-0.09075596	240	-0.05022048	240	-0.05939998	240	-0.1115186
240.19	1.388656	240.19	1.232618	240.19	1.265852	240.19	1.212658	240.19	1.160075	240.19	1.179274	240.19	1.193005	240.19	-0.1457106	240.2	-0.1204621	240.2	-0.1596238	240.2	-0.1257915	240.2	-0.1216172	240.2	-0.09248944	240.2	-0.05200495	240.2	-0.05805475	240.2	-0.1188132
240.39	1.393843	240.39	1.23976	240.39	1.273538	240.39	1.214167	240.39	1.159136	240.39	1.173806	240.39	1.19734	240.39	-0.1408411	240.4	-0.1232644	240.4	-0.1619194	240.4	-0.1253025	240.4	-0.1179985	240.4	-0.09233327	240.4	-0.05347325	240.4	-0.05995446	240.4	-0.1171983
240.59	1.394548	240.59	1.235139	240.59	1.268878	240.59	1.220376	240.59	1.158595	240.59	1.178273	240.59	1.190818	240.59	-0.1418179	240.6	-0.1239067	240.6	-0.1607285	240.6	-0.1216753	240.6	-0.1158523	240.6	-0.09356089	240.6	-0.0530732	240.6	-0.05519748	240.6	-0.1147558
240.79	1.393762	240.79	1.238607	240.79	1.270221	240.79	1.220437	240.79	1.159925	240.79	1.176575	240.79	1.193494	240.79	-0.1401737	240.8	-0.1231204	240.8	-0.1563725	240.8	-0.1229058	240.8	-0.1139665	240.8	-0.0924271	240.8	-0.0540449	240.8	-0.06007395	240.8	-0.1093784
240.99	1.390246	240.99	1.244441	240.99	1.26849	240.99	1.212824	240.99	1.160862	240.99	1.174462	240.99	1.196877	240.99	-0.1408278	241	-0.1209804	241	-0.1566691	241	-0.1193141	241	-0.113916	241	-0.0916085	241	-0.05373139	241	-0.06408521	241	-0.115498
241.19	1.392511	241.19	1.237422	241.19	1.273602	241.19	1.218101	241.19	1.163319	241.19	1.178348	241.19	1.199176	241.19	-0.1472769	241.2	-0.123438	241.2	-0.1597155	241.2	-0.1204974	241.2	-0.1166286	241.2	-0.09265083	241.2	-0.04876936	241.2	-0.05792103	241.2	-0.113174
241.39	1.39034	241.39	1.239651	241.39	1.272274	241.39	1.216689	241.39	1.162946	241.39	1.175996	241.39	1.196829	241.39	-0.1403942	241.4	-0.1209289	241.4	-0.1586623	241.4	-0.1222513	241.4	-0.1198396	241.4	-0.08985248	241.4	-0.04658106	241.4	-0.06287852	241.4	-0.1156506
241.6	1.394984	241.6	1.243552	241.6	1.270663	241.6	1.215408	241.6	1.159336	241.6	1.176752	241.6	1.193633	241.6	-0.1432103	241.6	-0.1199624	241.6	-0.1560626	241.6	-0.1205378	241.6	-0.1088637	241.6	-0.08851571	241.6	-0.05141425	241.6	-0.05991666	241.6	-0.1178787
241.79	1.394257	241.79	1.241403	241.79	1.271957	241.79	1.220075	241.79	1.161296	241.79	1.180909	241.79	1.196607	241.79	-0.1416992	241.8	-0.1226303	241.8	-0.1561245	241.8	-0.1201511	241.8	-0.1156723	241.8	-0.09635211	241.8	-0.05015826	241.8	-0.05905272	241.8	-0.113232
241.99	1.395854	241.99	1.24027	241.99	1.278005	241.99	1.22148	241.99	1.162089	241.99	1.177505	241.99	1.19386	241.99	-0.1425807	242	-0.1217764	242	-0.1568413	242	-0.1214241	242	-0.1120117	242	-0.09536451	242	-0.05093319	242	-0.05977665	242	-0.1096697
242.19	1.394128	242.19	1.241227	242.19	1.2737	242.19	1.220145	242.19	1.161674	242.19	1.181409	242.19	1.195818	242.19	-0.1427318	242.2	-0.1231533	242.2	-0.1560578	242.2	-0.1227356	242.2	-0.1155878	242.2	-0.09005176	242.2	-0.05338545	242.2	-0.06406416	242.2	-0.1134666
242.39	1.399214	242.39	1.242466	242.39	1.272758	242.39	1.219561	242.39	1.166925	242.39	1.179821	242.39	1.195135	242.39	-0.1414851	242.4	-0.1198567	242.4	-0.1554835	242.4	-0.1174096	242.4	-0.1098658	242.4	-0.09383792	242.4	-0.05278733	242.4	-0.05443121	242.4	-0.1125266
242.6	1.396363	242.6	1.247118	242.6	1.272657	242.6	1.217721	242.6	1.167427	242.6	1.183962	242.6	1.19345	242.6	-0.1426023	242.6	-0.1200591	242.6	-0.157399	242.6	-0.1212241	242.6	-0.1128568	242.6	-0.09213109	242.6	-0.05179858	242.6	-0.0570052	242.6	-0.1137949
242.79	1.401219	242.79	1.245055	242.79	1.275717	242.79	1.221683	242.79	1.168267	242.79	1.176139	242.79	1.194936	242.79	-0.1385322	242.8	-0.1184947	242.8	-0.1521675	242.8	-0.1152033	242.8	-0.1167376	242.8	-0.09532767	242.8	-0.05234998	242.8	-0.05537284	242.8	-0.1117554
243	1.39742	243	1.241501	243	1.277199	243	1.223662	243	1.162061	243	1.178015	243	1.197683	243	-0.1402362	243	-0.1209093	243	-0.1540973	243	-0.1224648	243	-0.1144705	243	-0.09263105	243	-0.04924592	243	-0.06111033	243	-0.1129197
243.19	1.397917	243.19	1.24653	243.19	1.282086	243.19	1.224207	243.19	1.169344	243.19	1.180359	243.19	1.200374	243.19	-0.1406187	243.2	-0.1187686	243.2	-0.1546083	243.2	-0.1200326	243.2	-0.1145232	243.2	-0.09293804	243.2	-0.05114269	243.2	-0.05874538	243.2	-0.1119633
243.4	1.397735	243.4	1.249297	243.4	1.27914	243.4	1.22212	243.4	1.165841	243.4	1.183409	243.4	1.203798	243.4	-0.1409182	243.4	-0.1181966	243.4	-0.1538441	243.4	-0.1201946	243.4	-0.1170134	243.4	-0.08838181	243.4	-0.05173596	243.4	-0.05850577	243.4	-0.1133092
243.6	1.402182	243.6	1.245553	243.6	1.28133	243.6	1.222908	243.6	1.170597	243.6	1.178916	243.6	1.198592	243.6	-0.1440291	243.6	-0.1242935	243.6	-0.152201	243.6	-0.1195513	243.6	-0.1162276	243.6	-0.08211013	243.6	-0.04779578	243.6	-0.05756461	243.6	-0.1084512
243.8	1.401168	243.8	1.246535	243.8	1.279034	243.8	1.221456	243.8	1.165872	243.8	1.181449	243.8	1.19968	243.8	-0.1441664	243.8	-0.1240241	243.8	-0.1547622	243.8	-0.115534	243.8	-0.1181883	243.8	-0.09225253	243.8	-0.05283566	243.8	-0.05710617	243.8	-0.1098956
244	1.403185	244	1.25052	244	1.28004	244	1.225075	244	1.167483	244	1.181628	244	1.199803	244	-0.1400381	244	-0.1191752	244	-0.154334	244	-0.1165594	244	-0.113662	244	-0.08902034	244	-0.0479973	244	-0.05577239	244	-0.1132814
244.2	1.39983	244.2	1.247541	244.2	1.279317	244.2	1.222669	244.2	1.162766	244.2	1.179018	244.2	1.195896	244.2	-0.1445455	244.2	-0.1198494	244.2	-0.1591458	244.2	-0.1157053	244.2	-0.1123985	244.2	-0.08842887	244.2	-0.04876972	244.2	-0.05777979	244.2	-0.1107201
244.4	1.406186	244.4	1.250456	244.4	1.283391	244.4	1.223941	244.4	1.167041	244.4	1.18185	244.4	1.196915	244.4	-0.1404229	244.4	-0.118293	244.4	-0.1525108	244.4	-0.1189915	244.4	-0.1185912	244.4	-0.09009936	244.4	-0.04904835	244.4	-0.05707966	244.4	-0.1124073
244.6	1.408457	244.6	1.246449	244.6	1.280857	244.6	1.229253	244.6	1.169319	244.6	1.181051	244.6	1.194961	244.6	-0.1386081	244.6	-0.1198199	244.6	-0.1556146	244.6	-0.1191839	244.6	-0.1145761	244.6	-0.08674815	244.6	-0.05057339	244.6	-0.05845277	244.6	-0.1087686
244.8	1.409616	244.8	1.253117	244.8	1.283197	244.8	1.228599	244.8	1.169249	244.8	1.180939	244.8	1.194191	244.8	-0.1402193	244.8	-0.1218509	244.8	-0.1529266	244.8	-0.1198772	244.8	-0.1105822	244.8	-0.08968914	244.8	-0.04943059	244.8	-0.05895517	244.8	-0.1060379
245	1.406141	245	1.250245	245	1.282803	245	1.226703	245	1.17037	245	1.185214	245	1.201501	245	-0.1393186	245	-0.1246398	245	-0.1558136	245	-0.1165053	245	-0.1101268	245	-0.09473173	245	-0.04364839	245	-0.05970301	245	-0.114026
245.2	1.402226	245.2	1.25272	245.2	1.278179	245.2	1.225543	245.2	1.169371	245.2	1.182294	245.2	1.196592	245.2	-0.1390793	245.2	-0.1189609	245.2	-0.1556943	245.2	-0.1167831	245.2	-0.1125825	245.2	-0.08481198	245.2	-0.04754447	245.2	-0.06007491	245.2	-0.1110593
245.4	1.403824	245.4	1.254633	245.4	1.282015	245.4	1.225728	245.4	1.167762	245.4	1.184122	245.4	1.196753	245.4	-0.1403446	245.4	-0.1210987	245.4	-0.1507186	245.4	-0.1170487	245.4	-0.1085159	245.4	-0.09205458	245.4	-0.04632368	245.4	-0.05848691	245.4	-0.1118557
245.6	1.410022	245.6	1.252603	245.6	1.28321	245.6	1.227292	245.6	1.16611	245.6	1.187852	245.6	1.202029	245.6	-0.144325	245.6	-0.1200088	245.6	-0.1530838	245.6	-0.1201825	245.6	-0.1135783	245.6	-0.087799	245.6	-0.04724472	245.6	-0.05774111	245.6	-0.111634
245.8	1.407936	245.8	1.252094	245.8	1.280558	245.8	1.228538	245.8	1.167616	245.8	1.183321	245.8	1.197446	245.8	-0.1331485	245.8	-0.120396	245.8	-0.1549557	245.8	-0.1204504	245.8	-0.1100629	245.8	-0.09140629	245.8	-0.04611917	245.8	-0.05725812	245.8	-0.1123846
246	1.407151	246	1.25063	246	1.283739	246	1.225696	246	1.17267	246	1.181342	246	1.198773	246	-0.1418866	246	-0.1155997	246	-0.1519414	246	-0.1184054	246	-0.1137833	246	-0.08622712	246	-0.04798513	246	-0.05352822	246	-0.114448
246.2	1.413517	246.2	1.258108	246.2	1.283041	246.2	1.22861	246.2	1.17176	246.2	1.18544	246.2	1.201192	246.2	-0.1437824	246.2	-0.120856	246.2	-0.154752	246.2	-0.1177253	246.2	-0.1120938	246.2	-0.09009852	246.2	-0.04797278	246.2	-0.0577991	246.2	-0.1161925
246.4	1.410238	246.4	1.256907	246.4	1.285782	246.4	1.232351	246.4	1.165502	246.4	1.184136	246.4	1.208976	246.4	-0.1411085	246.4	-0.1188754	246.4	-0.1532396	246.4	-0.1186757	246.4	-0.1149322	246.4	-0.08639437	246.4	-0.05081779	246.4	-0.0531692	246.4	-0.1114692
246.6	1.412426	246.6	1.255872	246.6	1.285983	246.6	1.234918	246.6	1.166943	246.6	1.188631	246.6	1.199146	246.6	-0.1431663	246.6	-0.1154635	246.6	-0.1534958	246.6	-0.1204323	246.6	-0.1135103	246.6	-0.08997745	246.6	-0.05047476	246.6	-0.06008811	246.6	-0.1117135
246.8	1.411375	246.8	1.256621	246.8	1.286185	246.8	1.22365	246.8	1.174002	246.8	1.187374	246.8	1.200685	246.8	-0.1447484	246.8	-0.1177531	246.8	-0.1553562	246.8	-0.116229	246.8	-0.1078836	246.8	-0.09133553	246.8	-0.0490475	246.8	-0.05946219	246.8	-0.1099822
247	1.40984	247	1.256038	247	1.288413	247	1.227898	247	1.171678	247	1.187543	247	1.194482	247	-0.1446255	247	-0.1164168	247	-0.1564597	247	-0.1146662	247	-0.1108639	247	-0.09144896	247	-0.04503644	247	-0.05940787	247	-0.1104198
247.2	1.416106	247.2	1.258704	247.2	1.289915	247.2	1.232476	247.2	1.171744	247.2	1.185694	247.2	1.201	247.2	-0.1396129	247.2	-0.1214258	247.2	-0.1530698	247.2	-0.1110376	247.2	-0.11654	247.2	-0.09051897	247.2	-0.04884749	247.2	-0.05908268	247.2	-0.112438
247.4	1.412094	247.4	1.256406	247.4	1.291963	247.4	1.227913	247.4	1.172086	247.4	1.188554	247.4	1.20139	247.4	-0.1397838	247.4	-0.1167241	247.4	-0.1513032	247.4	-0.1158444	247.4	-0.1078661	247.4	-0.08992508	247.4	-0.05163264	247.4	-0.05716825	247.4	-0.1134306
247.6	1.412675	247.6	1.260004	247.6	1.286545	247.6	1.232846	247.6	1.174671	247.6	1.186919	247.6	1.201004	247.6	-0.1362893	247.6	-0.1151759	247.6	-0.1531408	247.6	-0.1164163	247.6	-0.1145601	247.6	-0.08944385	247.6	-0.05017357	247.6	-0.05591687	247.6	-0.1098724
247.8	1.413163	247.8	1.255932	247.8	1.289342	247.8	1.233473	247.8	1.171509	247.8	1.182535	247.8	1.202969	247.8	-0.1388425	247.8	-0.117734	247.8	-0.1525032	247.8	-0.1176126	247.8	-0.1101253	247.8	-0.09004477	247.8	-0.05104948	247.8	-0.05826273	247.8	-0.1136681
247.99	1.410194	247.99	1.260107	247.99	1.28867	247.99	1.230653	247.99	1.175882	247.99	1.185024	247.99	1.201842	247.99	-0.1381888	248	-0.1177346	248	-0.1546118	248	-0.1170336	248	-0.1109242	248	-0.08299566	248	-0.04788485	248	-0.05678266	248	-0.1063057
248.2	1.418952	248.2	1.265584	248.2	1.286483	248.2	1.230664	248.2	1.168523	248.2	1.183063	248.2	1.203667	248.2	-0.1384778	248.2	-0.117638	248.2	-0.152874	248.2	-0.1171876	248.2	-0.1096487	248.2	-0.08864247	248.2	-0.05311678	248.2	-0.054619	248.2	-0.1094326
248.4	1.414702	248.4	1.262582	248.4	1.291291	248.4	1.231771	248.4	1.171897	248.4	1.18734	248.4	1.198181	248.4	-0.1398025	248.4	-0.1165202	248.4	-0.1541919	248.4	-0.1135758	248.4	-0.1138036	248.4	-0.08889526	248.4	-0.04712859	248.4	-0.05675663	248.4	-0.1077527
248.6	1.416679	248.6	1.256868	248.6	1.29161	248.6	1.236795	248.6	1.175854	248.6	1.181501	248.6	1.201789	248.6	-0.1422209	248.6	-0.1171206	248.6	-0.1520898	248.6	-0.1116123	248.6	-0.1146805	248.6	-0.08957438	248.6	-0.04824199	248.6	-0.05211232	248.6	-0.1037414
248.8	1.419798	248.8	1.262862	248.8	1.290168	248.8	1.238918	248.8	1.16471	248.8	1.188698	248.8	1.196849	248.8	-0.1383348	248.8	-0.1164864	248.8	-0.1567791	248.8	-0.1192232	248.8	-0.1097919	248.8	-0.08931733	248.8	-0.04720419	248.8	-0.0557622	248.8	-0.1096668
249	1.42105	249	1.260736	249	1.289271	249	1.23457	249	1.173422	249	1.183739	249	1.198587	249	-0.1374525	249	-0.1190643	249	-0.1531571	249	-0.1157036	249	-0.1115288	249	-0.08684049	249	-0.0494678	249	-0.05700991	249	-0.1069871
249.2	1.421775	249.2	1.261426	249.2	1.290701	249.2	1.236753	249.2	1.170548	249.2	1.184183	249.2	1.20424	249.2	-0.1396323	249.2	-0.1170617	249.2	-0.1529737	249.2	-0.117871	249.2	-0.108608	249.2	-0.0850879	249.2	-0.04838217	249.2	-0.05546309	249.2	-0.1113544
249.4	1.416705	249.4	1.260974	249.4	1.294163	249.4	1.234188	249.4	1.176435	249.4	1.183537	249.4	1.199163	249.4	-0.1368901	249.4	-0.1155927	249.4	-0.1546514	249.4	-0.1159472	249.4	-0.109542	249.4	-0.08434014	249.4	-0.04546375	249.4	-0.05607658	249.4	-0.1104776
249.6	1.416052	249.6	1.265603	249.6	1.294704	249.6	1.233769	249.6	1.180678	249.6	1.182201	249.6	1.204255	249.6	-0.1334807	249.6	-0.120035	249.6	-0.1517823	249.6	-0.1129153	249.6	-0.1109813	249.6	-0.08574654	249.6	-0.04821901	249.6	-0.05512794	249.6	-0.1103351
249.8	1.415566	249.8	1.263368	249.8	1.295348	249.8	1.24014	249.8	1.174378	249.8	1.187594	249.8	1.194671	249.8	-0.1372658	249.8	-0.1111182	249.8	-0.1491187	249.8	-0.1139423	249.8	-0.104949	249.8	-0.07896663	249.8	-0.04689486	249.8	-0.05362342	249.8	-0.1106556
250	1.419273	250	1.264325	250	1.293248	250	1.232654	250	1.172486	250	1.188839	250	1.19866	250	-0.1359692	250	-0.1131606	250	-0.1493687	250	-0.1134145	250	-0.1069543	250	-0.08817963	250	-0.04531334	250	-0.05552934	250	-0.1145034
250.2	1.415171	250.2	1.262329	250.2	1.295774	250.2	1.232943	250.2	1.176275	250.2	1.188391	250.2	1.203814	250.2	-0.1344168	250.2	-0.11877	250.2	-0.1520955	250.2	-0.1161547	250.2	-0.1101878	250.2	-0.0864225	250.2	-0.04820478	250.2	-0.05718255	250.2	-0.1106144
250.39	1.42141	250.39	1.264102	250.39	1.294621	250.39	1.233215	250.39	1.175733	250.39	1.187872	250.39	1.203241	250.39	-0.1332065	250.4	-0.1130605	250.4	-0.1537503	250.4	-0.1117791	250.4	-0.1108695	250.4	-0.08753132	250.4	-0.04795704	250.4	-0.05589617	250.4	-0.1044523
250.6	1.421887	250.6	1.265777	250.6	1.297377	250.6	1.235175	250.6	1.175078	250.6	1.186239	250.6	1.203094	250.6	-0.1389675	250.6	-0.1156484	250.6	-0.1474217	250.6	-0.1144528	250.6	-0.1111147	250.6	-0.08606114	250.6	-0.04875968	250.6	-0.05342026	250.6	-0.110407
250.8	1.421742	250.8	1.269118	250.8	1.296991	250.8	1.234663	250.8	1.174936	250.8	1.188383	250.8	1.203847	250.8	-0.1400089	250.8	-0.1168231	250.8	-0.151234	250.8	-0.1131216	250.8	-0.1052407	250.8	-0.08645375	250.8	-0.0511625	250.8	-0.05262733	250.8	-0.1162639
251	1.421801	251	1.266124	251	1.296022	251	1.237029	251	1.176235	251	1.18794	251	1.202738	251	-0.1387293	251	-0.1155265	251	-0.150342	251	-0.110191	251	-0.111497	251	-0.08850665	251	-0.04526034	251	-0.05319934	251	-0.1061466
251.2	1.422622	251.2	1.266088	251.2	1.296246	251.2	1.233318	251.2	1.180213	251.2	1.189656	251.2	1.20197	251.2	-0.1382535	251.2	-0.1146648	251.2	-0.1518692	251.2	-0.115922	251.2	-0.1091734	251.2	-0.08706401	251.2	-0.04686757	251.2	-0.05668315	251.2	-0.1049558
251.4	1.425876	251.4	1.26905	251.4	1.299137	251.4	1.241586	251.4	1.175416	251.4	1.187401	251.4	1.20121	251.4	-0.1376837	251.4	-0.1144561	251.4	-0.1510665	251.4	-0.1166805	251.4	-0.1115678	251.4	-0.0861655	251.4	-0.04881579	251.4	-0.05687182	251.4	-0.1066246
251.59	1.419886	251.59	1.267385	251.59	1.293684	251.59	1.238647	251.59	1.177623	251.59	1.190182	251.59	1.203865	251.59	-0.1337738	251.6	-0.1174669	251.6	-0.1518214	251.6	-0.1140844	251.6	-0.1086709	251.6	-0.08873685	251.6	-0.04477692	251.6	-0.05328341	251.6	-0.1067963
251.79	1.421175	251.79	1.266676	251.79	1.295653	251.79	1.2402	251.79	1.179902	251.79	1.185903	251.79	1.199325	251.79	-0.1353619	251.8	-0.1163103	251.8	-0.1477575	251.8	-0.1158965	251.8	-0.112894	251.8	-0.09037301	251.8	-0.04787019	251.8	-0.04804756	251.8	-0.1098512
252	1.427444	252	1.26761	252	1.295996	252	1.235431	252	1.175065	252	1.192083	252	1.201122	252	-0.1366956	252	-0.1081587	252	-0.1493826	252	-0.1137032	252	-0.1066119	252	-0.08522885	252	-0.04568798	252	-0.05453613	252	-0.1099614
252.2	1.425855	252.2	1.268888	252.2	1.297369	252.2	1.239368	252.2	1.178785	252.2	1.18679	252.2	1.199921	252.2	-0.1397622	252.2	-0.1131987	252.2	-0.1567913	252.2	-0.1105451	252.2	-0.1103358	252.2	-0.08593442	252.2	-0.05046638	252.2	-0.05551593	252.2	-0.1072569
252.4	1.426777	252.4	1.270037	252.4	1.302114	252.4	1.241811	252.4	1.178926	252.4	1.188503	252.4	1.203211	252.4	-0.1379861	252.4	-0.1163491	252.4	-0.1515539	252.4	-0.1124106	252.4	-0.1064707	252.4	-0.08509815	252.4	-0.04397298	252.4	-0.05380468	252.4	-0.1078553
252.6	1.429603	252.6	1.276587	252.6	1.299412	252.6	1.241984	252.6	1.177454	252.6	1.192402	252.6	1.203472	252.6	-0.1337384	252.6	-0.1138603	252.6	-0.1539954	252.6	-0.1145163	252.6	-0.1064079	252.6	-0.08855536	252.6	-0.04529379	252.6	-0.05398858	252.6	-0.108431
252.8	1.429888	252.8	1.266803	252.8	1.30233	252.8	1.236525	252.8	1.180336	252.8	1.192388	252.8	1.200529	252.8	-0.1395513	252.8	-0.1124019	252.8	-0.1514265	252.8	-0.1105253	252.8	-0.1054666	252.8	-0.08562703	252.8	-0.04629112	252.8	-0.05760133	252.8	-0.1080431
253	1.426844	253	1.268378	253	1.304495	253	1.235489	253	1.181173	253	1.190913	253	1.204945	253	-0.1382962	253	-0.1135408	253	-0.1539861	253	-0.1108106	253	-0.1100918	253	-0.08412533	253	-0.04548966	253	-0.05024397	253	-0.1061695
253.19	1.425865	253.19	1.272458	253.19	1.304638	253.19	1.243356	253.19	1.181106	253.19	1.191334	253.19	1.205596	253.19	-0.1334513	253.2	-0.1150959	253.2	-0.1503536	253.2	-0.1129713	253.2	-0.1112959	253.2	-0.08541235	253.2	-0.04919052	253.2	-0.05039763	253.2	-0.1083093
253.39	1.427691	253.39	1.276475	253.39	1.307624	253.39	1.238983	253.39	1.179193	253.39	1.189191	253.39	1.203859	253.39	-0.1411288	253.4	-0.1162611	253.4	-0.1516624	253.4	-0.1154134	253.4	-0.1085317	253.4	-0.08440843	253.4	-0.04282406	253.4	-0.0501345	253.4	-0.1113858
253.6	1.428535	253.6	1.271644	253.6	1.305285	253.6	1.238145	253.6	1.179965	253.6	1.196499	253.6	1.205222	253.6	-0.1373628	253.6	-0.1152892	253.6	-0.1472847	253.6	-0.1108607	253.6	-0.1105019	253.6	-0.08491894	253.6	-0.04366929	253.6	-0.05426832	253.6	-0.1113246
253.8	1.435376	253.8	1.275362	253.8	1.306977	253.8	1.241608	253.8	1.179314	253.8	1.187808	253.8	1.207007	253.8	-0.1383835	253.8	-0.1148584	253.8	-0.1495348	253.8	-0.1095408	253.8	-0.1066632	253.8	-0.08067963	253.8	-0.04269588	253.8	-0.05328959	253.8	-0.1080152
254	1.435513	254	1.27213	254	1.302956	254	1.242041	254	1.179336	254	1.198664	254	1.209022	254	-0.1355795	254	-0.1143863	254	-0.1476072	254	-0.1127488	254	-0.1082918	254	-0.08411466	254	-0.04820913	254	-0.05406154	254	-0.1055577
254.19	1.432605	254.19	1.274449	254.19	1.302297	254.19	1.249096	254.19	1.183194	254.19	1.192219	254.19	1.206972	254.19	-0.1347624	254.2	-0.1118045	254.2	-0.1464999	254.2	-0.1116001	254.2	-0.1079741	254.2	-0.08434776	254.2	-0.04550335	254.2	-0.05818324	254.2	-0.1075624
254.4	1.432478	254.4	1.274819	254.4	1.305351	254.4	1.244969	254.4	1.182242	254.4	1.194547	254.4	1.207444	254.4	-0.1393041	254.4	-0.1103961	254.4	-0.1523136	254.4	-0.1132555	254.4	-0.1060462	254.4	-0.08399282	254.4	-0.04481911	254.4	-0.05572045	254.4	-0.1049417
254.59	1.430795	254.59	1.276726	254.59	1.305576	254.59	1.243483	254.59	1.176376	254.59	1.192078	254.59	1.204082	254.59	-0.1378161	254.6	-0.1123236	254.6	-0.1500523	254.6	-0.1136573	254.6	-0.1060312	254.6	-0.08492377	254.6	-0.04612219	254.6	-0.05696871	254.6	-0.1069308
254.8	1.436981	254.8	1.274847	254.8	1.304101	254.8	1.243086	254.8	1.18717	254.8	1.19712	254.8	1.20954	254.8	-0.1388963	254.8	-0.1118555	254.8	-0.1508832	254.8	-0.1052867	254.8	-0.1107188	254.8	-0.08681218	254.8	-0.04213856	254.8	-0.05314129	254.8	-0.1004698
254.99	1.433786	254.99	1.269845	254.99	1.30614	254.99	1.245176	254.99	1.184896	254.99	1.194113	254.99	1.199014	254.99	-0.140574	255	-0.1105582	255	-0.1444457	255	-0.110276	255	-0.1071865	255	-0.08232001	255	-0.04647942	255	-0.05035256	255	-0.1039429
255.2	1.430946	255.2	1.27929	255.2	1.305723	255.2	1.240857	255.2	1.179202	255.2	1.19242	255.2	1.207606	255.2	-0.1386074	255.2	-0.1096674	255.2	-0.1487164	255.2	-0.1138692	255.2	-0.1076998	255.2	-0.08063803	255.2	-0.04735389	255.2	-0.04964641	255.2	-0.1102789
255.4	1.434782	255.4	1.277605	255.4	1.307914	255.4	1.24461	255.4	1.184927	255.4	1.196575	255.4	1.204123	255.4	-0.134117	255.4	-0.1188825	255.4	-0.147614	255.4	-0.1100749	255.4	-0.1086369	255.4	-0.08452392	255.4	-0.04328135	255.4	-0.04962712	255.4	-0.1075274
255.6	1.434697	255.6	1.277637	255.6	1.307645	255.6	1.246783	255.6	1.184854	255.6	1.195238	255.6	1.204169	255.6	-0.1390298	255.6	-0.1135206	255.6	-0.1494543	255.6	-0.1158484	255.6	-0.1064792	255.6	-0.0812971	255.6	-0.04441256	255.6	-0.05330741	255.6	-0.1071916
255.8	1.431605	255.8	1.278373	255.8	1.312762	255.8	1.244062	255.8	1.183005	255.8	1.1912	255.8	1.202692	255.8	-0.1351982	255.8	-0.1114416	255.8	-0.1461107	255.8	-0.1151782	255.8	-0.1027263	255.8	-0.08709795	255.8	-0.03971025	255.8	-0.05225535	255.8	-0.1088869
255.99	1.437629	255.99	1.276233	255.99	1.305498	255.99	1.251824	255.99	1.181903	255.99	1.193511	255.99	1.205518	255.99	-0.1347007	256	-0.116448	256	-0.1460138	256	-0.1116949	256	-0.1081394	256	-0.08432506	256	-0.04239072	256	-0.05248014	256	-0.106058
256.2	1.440306	256.2	1.278165	256.2	1.305427	256.2	1.246121	256.2	1.186266	256.2	1.193388	256.2	1.208662	256.2	-0.135689	256.2	-0.1150996	256.2	-0.1464072	256.2	-0.1142279	256.2	-0.1000433	256.2	-0.08102494	256.2	-0.0423389	256.2	-0.05607139	256.2	-0.1079444
256.39	1.438863	256.39	1.276052	256.39	1.310339	256.39	1.245308	256.39	1.179507	256.39	1.194894	256.39	1.210587	256.39	-0.1364286	256.4	-0.1101568	256.4	-0.1488534	256.4	-0.1126654	256.4	-0.1058138	256.4	-0.08559163	256.4	-0.03870649	256.4	-0.05491671	256.4	-0.1073734
256.6	1.4392	256.6	1.282156	256.6	1.309581	256.6	1.249084	256.6	1.188831	256.6	1.195708	256.6	1.210369	256.6	-0.1375828	256.6	-0.1132329	256.6	-0.1503514	256.6	-0.1165688	256.6	-0.1027947	256.6	-0.08250969	256.6	-0.04438721	256.6	-0.05074274	256.6	-0.1049205
256.79	1.438968	256.79	1.282934	256.79	1.313826	256.79	1.249874	256.79	1.184233	256.79	1.19965	256.79	1.210055	256.79	-0.1349094	256.8	-0.1145272	256.8	-0.1462692	256.8	-0.108804	256.8	-0.1084158	256.8	-0.08362269	256.8	-0.04104314	256.8	-0.05181837	256.8	-0.1081144
257	1.435623	257	1.281067	257	1.307555	257	1.247884	257	1.184968	257	1.189942	257	1.204242	257	-0.1349332	257	-0.1132799	257	-0.1508328	257	-0.1084244	257	-0.1118133	257	-0.08075763	257	-0.04372485	257	-0.05208521	257	-0.1068618
257.2	1.437171	257.2	1.284126	257.2	1.311417	257.2	1.247001	257.2	1.184917	257.2	1.191678	257.2	1.205963	257.2	-0.129441	257.2	-0.1139696	257.2	-0.1485446	257.2	-0.1101581	257.2	-0.1033438	257.2	-0.08149099	257.2	-0.04051396	257.2	-0.04928453	257.2	-0.1009501
257.39	1.435479	257.39	1.282592	257.39	1.312577	257.39	1.24909	257.39	1.185383	257.39	1.198295	257.39	1.209255	257.39	-0.1338546	257.4	-0.1115689	257.4	-0.1511829	257.4	-0.10922	257.4	-0.1091885	257.4	-0.08281384	257.4	-0.04075436	257.4	-0.05022712	257.4	-0.1090578
257.59	1.440154	257.59	1.282554	257.59	1.311579	257.59	1.249447	257.59	1.18765	257.59	1.196672	257.59	1.206846	257.59	-0.1383295	257.6	-0.1083208	257.6	-0.1465656	257.6	-0.1119972	257.6	-0.1085084	257.6	-0.08357919	257.6	-0.04005062	257.6	-0.05536557	257.6	-0.1073374
257.79	1.439899	257.79	1.282158	257.79	1.308906	257.79	1.246835	257.79	1.187906	257.79	1.19733	257.79	1.209356	257.79	-0.1362891	257.8	-0.1133181	257.8	-0.1494236	257.8	-0.109766	257.8	-0.1007326	257.8	-0.08434094	257.8	-0.04139698	257.8	-0.04599412	257.8	-0.1085177
257.99	1.43952	257.99	1.28254	257.99	1.312868	257.99	1.2506	257.99	1.190719	257.99	1.195528	257.99	1.207545	257.99	-0.1342758	258	-0.1095167	258	-0.1525903	258	-0.1092352	258	-0.1058131	258	-0.07871004	258	-0.04713479	258	-0.04903016	258	-0.1081805
258.19	1.443995	258.19	1.285088	258.19	1.315227	258.19	1.244885	258.19	1.187538	258.19	1.196015	258.19	1.201414	258.19	-0.132837	258.2	-0.111553	258.2	-0.1468531	258.2	-0.107267	258.2	-0.1076127	258.2	-0.08022408	258.2	-0.04413599	258.2	-0.05301236	258.2	-0.1051008
258.4	1.440863	258.4	1.281908	258.4	1.312722	258.4	1.250872	258.4	1.188199	258.4	1.195205	258.4	1.214247	258.4	-0.1371877	258.4	-0.1091655	258.4	-0.1435714	258.4	-0.111955	258.4	-0.1031878	258.4	-0.07925519	258.4	-0.04213478	258.4	-0.04939982	258.4	-0.1043014
258.59	1.440282	258.59	1.287656	258.59	1.309242	258.59	1.254723	258.59	1.185725	258.59	1.200643	258.59	1.206329	258.59	-0.1333272	258.6	-0.1075859	258.6	-0.1484819	258.6	-0.1099826	258.6	-0.1027145	258.6	-0.08195894	258.6	-0.04347999	258.6	-0.04758311	258.6	-0.1094218
258.8	1.435453	258.8	1.285096	258.8	1.318969	258.8	1.255506	258.8	1.188106	258.8	1.202685	258.8	1.208853	258.8	-0.131678	258.83	-0.1119031	258.83	-0.1427621	258.83	-0.109678	258.83	-0.1064126	258.83	-0.07998513	258.83	-0.03866091	258.83	-0.05130102	258.83	-0.1078047
259	1.442137	259	1.282131	259	1.316959	259	1.253675	259	1.187925	259	1.198649	259	1.210919	259	-0.134897	259	-0.1086513	259	-0.1516602	259	-0.1088945	259	-0.110393	259	-0.08549402	259	-0.04339584	259	-0.05653486	259	-0.1014932
259.19	1.438781	259.19	1.28927	259.19	1.315515	259.19	1.253681	259.19	1.187582	259.19	1.195017	259.19	1.2094	259.19	-0.1313843	259.2	-0.1103613	259.2	-0.1403339	259.2	-0.1112051	259.2	-0.1085197	259.2	-0.07749366	259.2	-0.03813608	259.2	-0.05073883	259.2	-0.1048142
259.39	1.440705	259.39	1.285411	259.39	1.315847	259.39	1.252419	259.39	1.187909	259.39	1.195388	259.39	1.21232	259.39	-0.1335383	259.4	-0.1074802	259.4	-0.1450454	259.4	-0.1107594	259.4	-0.1076092	259.4	-0.07765508	259.4	-0.04042373	259.4	-0.04709132	259.4	-0.1026539
259.59	1.447212	259.59	1.284063	259.59	1.31647	259.59	1.246895	259.59	1.185403	259.59	1.199584	259.59	1.207872	259.59	-0.1303148	259.6	-0.1151824	259.6	-0.1460921	259.6	-0.109158	259.6	-0.1029724	259.6	-0.07837891	259.6	-0.04318662	259.6	-0.04458036	259.6	-0.1049571
259.79	1.450266	259.79	1.290495	259.79	1.315953	259.79	1.25249	259.79	1.189536	259.79	1.197266	259.79	1.212341	259.79	-0.1302503	259.8	-0.1049235	259.8	-0.1442092	259.8	-0.1086805	259.8	-0.105312	259.8	-0.08146793	259.8	-0.04446032	259.8	-0.04885906	259.8	-0.1067515
260	1.445758	260	1.293077	260	1.313935	260	1.25215	260	1.189259	260	1.194764	260	1.207415	260	-0.1381505	260	-0.1111663	260	-0.1446758	260	-0.1096407	260	-0.1046394	260	-0.08077006	260	-0.04233341	260	-0.04660041	260	-0.1059618
260.19	1.444199	260.19	1.295075	260.19	1.320051	260.19	1.254455	260.19	1.186451	260.19	1.199886	260.19	1.208901	260.19	-0.1328095	260.2	-0.1108963	260.2	-0.1425102	260.2	-0.110683	260.2	-0.1042971	260.2	-0.07960827	260.2	-0.04336581	260.2	-0.04870334	260.2	-0.105445
260.39	1.446052	260.39	1.296308	260.39	1.313003	260.39	1.252086	260.39	1.189268	260.39	1.197344	260.39	1.20773	260.39	-0.1325545	260.4	-0.1131506	260.4	-0.1475084	260.4	-0.1111262	260.4	-0.102818	260.4	-0.08156866	260.4	-0.03938084	260.4	-0.05597365	260.4	-0.1034686
260.6	1.448079	260.6	1.287931	260.6	1.317937	260.6	1.249394	260.6	1.193355	260.6	1.197287	260.6	1.211347	260.6	-0.1312995	260.6	-0.1126749	260.6	-0.1409216	260.6	-0.1093969	260.6	-0.1050227	260.6	-0.08056112	260.6	-0.03772093	260.6	-0.05089273	260.6	-0.1088321
260.79	1.444504	260.79	1.293021	260.79	1.316426	260.79	1.251475	260.79	1.190867	260.79	1.198797	260.79	1.212452	260.79	-0.132569	260.8	-0.1127637	260.8	-0.1472958	260.8	-0.1061008	260.8	-0.1012867	260.8	-0.08027575	260.8	-0.03888388	260.8	-0.05045287	260.8	-0.1049985
260.99	1.450055	260.99	1.291453	260.99	1.317408	260.99	1.256865	260.99	1.194263	260.99	1.200356	260.99	1.213757	260.99	-0.1326521	261	-0.1087558	261	-0.1422932	261	-0.1090616	261	-0.1031017	261	-0.08151326	261	-0.03809651	261	-0.04714521	261	-0.1066917
261.19	1.449175	261.19	1.291223	261.19	1.321437	261.19	1.25307	261.19	1.191283	261.19	1.198515	261.19	1.208777	261.19	-0.1323478	261.2	-0.1105616	261.2	-0.1467647	261.2	-0.1121031	261.2	-0.1045503	261.2	-0.07997929	261.2	-0.04258079	261.2	-0.04971382	261.2	-0.1049585
261.39	1.449184	261.39	1.293716	261.39	1.320798	261.39	1.255542	261.39	1.189467	261.39	1.200598	261.39	1.210513	261.39	-0.1288411	261.4	-0.1088563	261.4	-0.1442048	261.4	-0.1065722	261.4	-0.1060914	261.4	-0.08113119	261.4	-0.04479629	261.4	-0.04861224	261.4	-0.1053276
261.59	1.445753	261.59	1.294356	261.59	1.319144	261.59	1.259023	261.59	1.195333	261.59	1.202956	261.59	1.209559	261.59	-0.1368043	261.6	-0.1108136	261.6	-0.1429558	261.6	-0.1093001	261.6	-0.1064019	261.6	-0.07914063	261.6	-0.04145169	261.6	-0.04566092	261.6	-0.108188
261.79	1.449779	261.79	1.296088	261.79	1.323058	261.79	1.255585	261.79	1.189318	261.79	1.20155	261.79	1.211038	261.79	-0.1312245	261.8	-0.1087273	261.8	-0.1449396	261.8	-0.106736	261.8	-0.1029404	261.8	-0.08037391	261.8	-0.04133198	261.8	-0.04977725	261.8	-0.1067947
261.99	1.450846	261.99	1.295196	261.99	1.32349	261.99	1.255249	261.99	1.191648	261.99	1.201719	261.99	1.213235	261.99	-0.1322225	262	-0.1104929	262	-0.1385005	262	-0.105887	262	-0.1031902	262	-0.08267781	262	-0.04428868	262	-0.04682555	262	-0.1013409
262.2	1.454386	262.2	1.295003	262.2	1.314402	262.2	1.257562	262.2	1.189697	262.2	1.198246	262.2	1.212172	262.2	-0.1328295	262.2	-0.1082623	262.2	-0.1436403	262.2	-0.1095768	262.2	-0.09958068	262.2	-0.08214621	262.2	-0.04640312	262.2	-0.05048882	262.2	-0.1010609
262.39	1.452587	262.39	1.294679	262.39	1.323162	262.39	1.256878	262.39	1.190166	262.39	1.201437	262.39	1.210149	262.39	-0.1313158	262.4	-0.1099553	262.4	-0.1420997	262.4	-0.1052081	262.4	-0.1024565	262.4	-0.07824685	262.4	-0.04058513	262.4	-0.04619036	262.4	-0.09993497
262.59	1.454174	262.59	1.297832	262.59	1.31902	262.59	1.256799	262.59	1.189758	262.59	1.199239	262.59	1.210168	262.59	-0.1324648	262.6	-0.1081152	262.6	-0.1438584	262.6	-0.1084238	262.6	-0.1052491	262.6	-0.08333986	262.6	-0.03807758	262.6	-0.04425311	262.6	-0.1032579
262.79	1.457789	262.79	1.293657	262.79	1.320438	262.79	1.258731	262.79	1.197029	262.79	1.200245	262.79	1.213052	262.79	-0.1335524	262.8	-0.1068811	262.8	-0.1458996	262.8	-0.1042585	262.8	-0.1033347	262.8	-0.08317838	262.8	-0.04314774	262.8	-0.04930518	262.8	-0.1003965
262.99	1.447248	262.99	1.295213	262.99	1.323796	262.99	1.254117	262.99	1.193787	262.99	1.19864	262.99	1.209009	262.99	-0.1317719	263	-0.1086284	263	-0.1461936	263	-0.104679	263	-0.1006603	263	-0.08044728	263	-0.03665215	263	-0.05019209	263	-0.1064207
263.19	1.450787	263.19	1.297174	263.19	1.32564	263.19	1.259499	263.19	1.198715	263.19	1.203794	263.19	1.209712	263.19	-0.1349484	263.2	-0.1068808	263.2	-0.1426589	263.2	-0.1112464	263.2	-0.1018198	263.2	-0.08158727	263.2	-0.03960571	263.2	-0.04769443	263.2	-0.1056923
263.39	1.455601	263.39	1.302311	263.39	1.323331	263.39	1.261102	263.39	1.190073	263.39	1.201781	263.39	1.211881	263.39	-0.1361327	263.4	-0.1088645	263.4	-0.1444665	263.4	-0.1056043	263.4	-0.1010674	263.4	-0.08010543	263.4	-0.0372352	263.4	-0.04799677	263.4	-0.106371
263.59	1.455417	263.59	1.293755	263.59	1.325415	263.59	1.260867	263.59	1.195021	263.59	1.202556	263.59	1.21379	263.59	-0.1304075	263.6	-0.1059265	263.6	-0.1440689	263.6	-0.1070417	263.6	-0.100682	263.6	-0.07482214	263.6	-0.03816426	263.6	-0.04843758	263.6	-0.1073248
263.79	1.455745	263.79	1.298466	263.79	1.323834	263.79	1.261446	263.79	1.196841	263.79	1.201506	263.79	1.216341	263.79	-0.131225	263.8	-0.1062565	263.8	-0.1444353	263.8	-0.1113315	263.8	-0.1044527	263.8	-0.07759642	263.8	-0.03919978	263.8	-0.04379705	263.8	-0.09779688
263.99	1.45499	263.99	1.295187	263.99	1.32329	263.99	1.260121	263.99	1.19818	263.99	1.200674	263.99	1.21233	263.99	-0.1336451	264	-0.1077559	264	-0.1431373	264	-0.1072974	264	-0.1058129	264	-0.07600026	264	-0.03682442	264	-0.04590616	264	-0.1032392
264.19	1.461257	264.19	1.298192	264.19	1.327353	264.19	1.260434	264.19	1.19426	264.19	1.200968	264.19	1.210222	264.19	-0.129345	264.2	-0.1072346	264.2	-0.1428914	264.2	-0.1080979	264.2	-0.1019609	264.2	-0.07712024	264.2	-0.03823562	264.2	-0.04806112	264.2	-0.0998611
264.39	1.457659	264.39	1.300757	264.39	1.326576	264.39	1.256846	264.39	1.194418	264.39	1.199034	264.39	1.210147	264.39	-0.1325968	264.4	-0.1041484	264.4	-0.1484104	264.4	-0.106616	264.4	-0.1043499	264.4	-0.08282658	264.4	-0.03934649	264.4	-0.04186111	264.4	-0.1020945
264.6	1.458483	264.6	1.295592	264.6	1.32991	264.6	1.261085	264.6	1.195408	264.6	1.196827	264.6	1.21532	264.6	-0.1325655	264.6	-0.107738	264.6	-0.1429426	264.6	-0.1048062	264.6	-0.1000893	264.6	-0.07773311	264.6	-0.0411745	264.6	-0.05052352	264.6	-0.1028686
264.79	1.459399	264.79	1.301079	264.79	1.326177	264.79	1.258679	264.79	1.195194	264.79	1.206227	264.79	1.216192	264.79	-0.133703	264.8	-0.1070589	264.8	-0.1509906	264.8	-0.1079823	264.8	-0.09933244	264.8	-0.08138841	264.8	-0.03840056	264.8	-0.04746193	264.8	-0.1015138
265	1.462922	265	1.301874	265	1.326319	265	1.257043	265	1.199334	265	1.204143	265	1.21576	265	-0.1273504	265	-0.1053533	265	-0.1472291	265	-0.1061922	265	-0.10298	265	-0.07577739	265	-0.03750254	265	-0.04633179	265	-0.1069633
265.2	1.457368	265.2	1.301826	265.2	1.330299	265.2	1.264387	265.2	1.194207	265.2	1.204865	265.2	1.212014	265.2	-0.1287477	265.2	-0.1089604	265.2	-0.1445706	265.2	-0.1072856	265.2	-0.1054507	265.2	-0.0810148	265.2	-0.03860894	265.2	-0.04663985	265.2	-0.1034409
265.4	1.460953	265.4	1.301567	265.4	1.328539	265.4	1.262435	265.4	1.190803	265.4	1.203306	265.4	1.215023	265.4	-0.1351742	265.4	-0.1046078	265.4	-0.1448791	265.4	-0.1058898	265.4	-0.1040425	265.4	-0.07769772	265.4	-0.03739616	265.4	-0.04388682	265.4	-0.1003048
265.6	1.460426	265.6	1.301433	265.6	1.326815	265.6	1.259729	265.6	1.199303	265.6	1.204062	265.6	1.213772	265.6	-0.1293001	265.6	-0.1078727	265.6	-0.1439484	265.6	-0.1056039	265.6	-0.1035148	265.6	-0.07973391	265.6	-0.03859333	265.6	-0.04589567	265.6	-0.09912502
265.8	1.454544	265.8	1.304628	265.8	1.331569	265.8	1.258009	265.8	1.198118	265.8	1.204049	265.8	1.215121	265.8	-0.1317595	265.8	-0.1056203	265.8	-0.1449316	265.8	-0.1017734	265.8	-0.1030817	265.8	-0.08360697	265.8	-0.03880037	265.8	-0.04594612	265.8	-0.09954339
266	1.460751	266	1.298702	266	1.327591	266	1.262833	266	1.202347	266	1.205909	266	1.21322	266	-0.131495	266	-0.1068477	266	-0.1401256	266	-0.1055857	266	-0.09908827	266	-0.07652685	266	-0.03733763	266	-0.04853659	266	-0.09951596
266.2	1.459516	266.2	1.301878	266.2	1.328939	266.2	1.261933	266.2	1.199962	266.2	1.203229	266.2	1.216318	266.2	-0.1362568	266.2	-0.1087806	266.2	-0.1380135	266.2	-0.1041802	266.2	-0.104876	266.2	-0.07796828	266.2	-0.03924259	266.2	-0.04786212	266.2	-0.09672669
266.4	1.465101	266.4	1.300789	266.4	1.329293	266.4	1.268531	266.4	1.196656	266.4	1.21059	266.4	1.214808	266.4	-0.1333819	266.4	-0.1095015	266.4	-0.1393595	266.4	-0.1080284	266.4	-0.1009918	266.4	-0.07289082	266.4	-0.038347	266.4	-0.04884109	266.4	-0.09950531
266.6	1.462705	266.6	1.303228	266.6	1.33458	266.6	1.264316	266.6	1.195763	266.6	1.203504	266.6	1.212981	266.6	-0.1279009	266.6	-0.108973	266.6	-0.1399838	266.6	-0.1042458	266.6	-0.106942	266.6	-0.07748939	266.6	-0.03410307	266.6	-0.04647137	266.6	-0.1035433
266.8	1.457976	266.8	1.305041	266.8	1.335025	266.8	1.257918	266.8	1.198462	266.8	1.208282	266.8	1.215953	266.8	-0.130201	266.8	-0.1075275	266.8	-0.144476	266.8	-0.1066523	266.8	-0.1032808	266.8	-0.08285241	266.8	-0.03686458	266.8	-0.04150379	266.8	-0.1015361
267	1.458685	267	1.304332	267	1.331403	267	1.261468	267	1.198315	267	1.199906	267	1.215964	267	-0.1294704	267	-0.1088525	267	-0.1434962	267	-0.105518	267	-0.1000984	267	-0.07566352	267	-0.03828431	267	-0.04510566	267	-0.1034009
267.2	1.458145	267.2	1.302413	267.2	1.334637	267.2	1.260088	267.2	1.198902	267.2	1.20459	267.2	1.216228	267.2	-0.1257672	267.2	-0.1051715	267.2	-0.1426489	267.2	-0.108326	267.2	-0.09982571	267.2	-0.08157732	267.2	-0.04127221	267.2	-0.05092311	267.2	-0.1080089
267.4	1.465618	267.4	1.305369	267.4	1.33409	267.4	1.263042	267.4	1.201773	267.4	1.204545	267.4	1.216798	267.4	-0.1285519	267.4	-0.105616	267.4	-0.1463584	267.4	-0.1061311	267.4	-0.1001175	267.4	-0.08089273	267.4	-0.03274226	267.4	-0.04483669	267.4	-0.09795096
267.6	1.457974	267.6	1.299083	267.6	1.336504	267.6	1.263838	267.6	1.200623	267.6	1.203091	267.6	1.214975	267.6	-0.1288447	267.6	-0.1030073	267.6	-0.136927	267.6	-0.1065756	267.6	-0.09994709	267.6	-0.0773297	267.6	-0.04095864	267.6	-0.046744	267.6	-0.101749
267.79	1.46153	267.79	1.308266	267.79	1.334294	267.79	1.262562	267.79	1.199896	267.79	1.202095	267.79	1.217103	267.79	-0.1281888	267.8	-0.1075545	267.8	-0.141634	267.8	-0.1066453	267.8	-0.1057095	267.8	-0.07427879	267.8	-0.03813675	267.8	-0.04502049	267.8	-0.1022765
268	1.468559	268	1.308484	268	1.33262	268	1.265169	268	1.202296	268	1.207769	268	1.219504	268	-0.1334396	268	-0.1044622	268	-0.1461535	268	-0.1029187	268	-0.100231	268	-0.07999367	268	-0.03563477	268	-0.04341461	268	-0.1045001
268.2	1.460544	268.2	1.309023	268.2	1.333838	268.2	1.270456	268.2	1.199647	268.2	1.211552	268.2	1.21258	268.2	-0.1320985	268.2	-0.1058231	268.2	-0.1359201	268.2	-0.1037048	268.2	-0.1020678	268.2	-0.07772632	268.2	-0.03839832	268.2	-0.04273553	268.2	-0.1009093
268.39	1.469954	268.39	1.30412	268.39	1.333916	268.39	1.268355	268.39	1.197423	268.39	1.202578	268.39	1.214646	268.39	-0.1253	268.4	-0.1018355	268.4	-0.1424397	268.4	-0.1070402	268.4	-0.1021868	268.4	-0.07700248	268.4	-0.03770394	268.4	-0.04378549	268.4	-0.09908607
268.6	1.466645	268.6	1.308665	268.6	1.334832	268.6	1.268161	268.6	1.198741	268.6	1.206726	268.6	1.218091	268.6	-0.1305522	268.6	-0.1063129	268.6	-0.1390247	268.6	-0.107512	268.6	-0.1019382	268.6	-0.08206144	268.6	-0.03887575	268.6	-0.04331171	268.6	-0.09852633
268.8	1.462205	268.8	1.306228	268.8	1.33873	268.8	1.264693	268.8	1.194705	268.8	1.207685	268.8	1.220964	268.8	-0.1273644	268.8	-0.100101	268.8	-0.1431098	268.8	-0.1034282	268.8	-0.09765837	268.8	-0.07362059	268.8	-0.03859025	268.8	-0.04290117	268.8	-0.1043251
269	1.466572	269	1.308517	269	1.33487	269	1.270456	269	1.200074	269	1.2034	269	1.220484	269	-0.1287433	269	-0.1022749	269	-0.1404948	269	-0.1020075	269	-0.1005666	269	-0.07946464	269	-0.03805548	269	-0.04516881	269	-0.1009863
269.2	1.46749	269.2	1.312076	269.2	1.333206	269.2	1.267212	269.2	1.199935	269.2	1.204028	269.2	1.217399	269.2	-0.1256326	269.2	-0.1016755	269.2	-0.1416342	269.2	-0.1088859	269.2	-0.1003758	269.2	-0.07334034	269.2	-0.03583841	269.2	-0.04757834	269.2	-0.1007682
269.4	1.468906	269.4	1.31005	269.4	1.340719	269.4	1.272253	269.4	1.199159	269.4	1.204041	269.4	1.214777	269.4	-0.1294774	269.4	-0.1085576	269.4	-0.1409035	269.4	-0.1005064	269.4	-0.09951114	269.4	-0.07482432	269.4	-0.03449525	269.4	-0.04699796	269.4	-0.09989924
269.6	1.472653	269.6	1.307711	269.6	1.337017	269.6	1.27023	269.6	1.202918	269.6	1.204601	269.6	1.215905	269.6	-0.132067	269.6	-0.09983552	269.6	-0.1389475	269.6	-0.1028686	269.6	-0.09772635	269.6	-0.07494222	269.6	-0.03748388	269.6	-0.04121657	269.6	-0.1044771
269.8	1.46998	269.8	1.31028	269.8	1.334692	269.8	1.272212	269.8	1.2055	269.8	1.2042	269.8	1.219993	269.8	-0.1325454	269.8	-0.1014414	269.8	-0.1387064	269.8	-0.1058551	269.8	-0.1035039	269.8	-0.07530545	269.8	-0.03661665	269.8	-0.04582896	269.8	-0.09903853
270	1.471176	270	1.31233	270	1.340147	270	1.268081	270	1.204012	270	1.211933	270	1.219242	270	-0.1326806	270	-0.1023215	270	-0.139787	270	-0.1001926	270	-0.09974448	270	-0.07847144	270	-0.0364315	270	-0.0454641	270	-0.09819834
270.2	1.470096	270.2	1.310589	270.2	1.336529	270.2	1.271106	270.2	1.203409	270.2	1.207796	270.2	1.214511	270.2	-0.1255701	270.2	-0.104116	270.2	-0.1437924	270.2	-0.105741	270.2	-0.1020158	270.2	-0.07531367	270.2	-0.0361007	270.2	-0.04290807	270.2	-0.1012761
270.4	1.47313	270.4	1.30707	270.4	1.33721	270.4	1.266389	270.4	1.201419	270.4	1.206403	270.4	1.212345	270.4	-0.134803	270.4	-0.1049412	270.4	-0.1442008	270.4	-0.1006906	270.4	-0.09830409	270.4	-0.07657673	270.4	-0.03462381	270.4	-0.04855999	270.4	-0.1007651
270.6	1.471176	270.6	1.315713	270.6	1.344283	270.6	1.270817	270.6	1.200367	270.6	1.212785	270.6	1.220651	270.6	-0.130228	270.6	-0.1026794	270.6	-0.1411392	270.6	-0.1041723	270.6	-0.1022136	270.6	-0.0738892	270.6	-0.03636223	270.6	-0.04368755	270.6	-0.09740759
270.8	1.47173	270.8	1.310207	270.8	1.339667	270.8	1.26825	270.8	1.202372	270.8	1.209208	270.8	1.22215	270.8	-0.132186	270.8	-0.104545	270.8	-0.1406787	270.8	-0.1056657	270.8	-0.098771	270.8	-0.07591096	270.8	-0.03712279	270.8	-0.0457707	270.8	-0.09258403
271	1.469211	271	1.309537	271	1.339211	271	1.2674	271	1.207342	271	1.207748	271	1.213685	271	-0.1301829	271	-0.1070377	271	-0.134496	271	-0.1055049	271	-0.1040389	271	-0.0759602	271	-0.03361618	271	-0.04704925	271	-0.09605306
271.2	1.470398	271.2	1.309888	271.2	1.343587	271.2	1.271317	271.2	1.206742	271.2	1.207968	271.2	1.218339	271.2	-0.1294011	271.2	-0.1032668	271.2	-0.1367804	271.2	-0.1045263	271.2	-0.09777235	271.2	-0.0790104	271.2	-0.03888957	271.2	-0.04634574	271.2	-0.1023743
271.4	1.471774	271.4	1.311487	271.4	1.337311	271.4	1.269155	271.4	1.200075	271.4	1.21055	271.4	1.219524	271.4	-0.1322345	271.4	-0.1012148	271.4	-0.1384186	271.4	-0.1005951	271.4	-0.1007885	271.4	-0.07973626	271.4	-0.0379188	271.4	-0.0454369	271.4	-0.1017978
271.59	1.471521	271.59	1.313973	271.59	1.340729	271.59	1.269584	271.59	1.206356	271.59	1.209732	271.59	1.218214	271.59	-0.1315922	271.6	-0.1020917	271.6	-0.1390987	271.6	-0.1041516	271.6	-0.09843553	271.6	-0.07338857	271.6	-0.03939021	271.6	-0.04670255	271.6	-0.1041927
271.8	1.471432	271.8	1.309235	271.8	1.340251	271.8	1.281463	271.8	1.206583	271.8	1.206143	271.8	1.213892	271.8	-0.1295789	271.8	-0.1024845	271.8	-0.1399899	271.8	-0.1029751	271.8	-0.09430254	271.8	-0.07609088	271.8	-0.03489059	271.8	-0.04199846	271.8	-0.09773047
272	1.475717	272	1.318321	272	1.342951	272	1.272209	272	1.203024	272	1.208688	272	1.218335	272	-0.1276533	272	-0.1057754	272	-0.1402156	272	-0.1020084	272	-0.09820256	272	-0.07494609	272	-0.0322706	272	-0.04423803	272	-0.09989008
272.2	1.470506	272.2	1.316907	272.2	1.34033	272.2	1.269851	272.2	1.204069	272.2	1.205392	272.2	1.220094	272.2	-0.1287061	272.2	-0.1062279	272.2	-0.1412467	272.2	-0.1066737	272.2	-0.09512448	272.2	-0.07545272	272.2	-0.03228895	272.2	-0.04183045	272.2	-0.09992208
272.39	1.473443	272.39	1.315901	272.39	1.342431	272.39	1.272329	272.39	1.209326	272.39	1.206095	272.39	1.220051	272.39	-0.1306123	272.4	-0.1044756	272.4	-0.1413915	272.4	-0.1063077	272.4	-0.09545245	272.4	-0.07508728	272.4	-0.03355227	272.4	-0.04273891	272.4	-0.100477
272.6	1.470264	272.6	1.319715	272.6	1.338946	272.6	1.275306	272.6	1.201594	272.6	1.203609	272.6	1.215807	272.6	-0.1305308	272.6	-0.1047456	272.6	-0.1409753	272.6	-0.1048055	272.6	-0.09838382	272.6	-0.0731116	272.6	-0.03474983	272.6	-0.04508159	272.6	-0.1001934
272.8	1.475185	272.8	1.316911	272.8	1.344773	272.8	1.271448	272.8	1.206338	272.8	1.208922	272.8	1.224298	272.8	-0.1304625	272.8	-0.1015921	272.8	-0.1369207	272.8	-0.1063164	272.8	-0.09623227	272.8	-0.07234924	272.8	-0.03326492	272.8	-0.04545494	272.8	-0.09988382
273	1.480121	273	1.316729	273	1.337991	273	1.26747	273	1.207097	273	1.209053	273	1.221114	273	-0.1286149	273	-0.1034026	273	-0.1442935	273	-0.1007384	273	-0.09780446	273	-0.07207386	273	-0.03375632	273	-0.04285233	273	-0.0970078
273.2	1.472178	273.2	1.310897	273.2	1.346974	273.2	1.275452	273.2	1.207171	273.2	1.208531	273.2	1.224124	273.2	-0.131547	273.2	-0.1002464	273.2	-0.1408689	273.2	-0.1017441	273.2	-0.09688594	273.2	-0.07443184	273.2	-0.03125917	273.2	-0.04325949	273.2	-0.09864809
273.4	1.474426	273.4	1.320376	273.4	1.345665	273.4	1.271818	273.4	1.207485	273.4	1.211312	273.4	1.215156	273.4	-0.1286353	273.4	-0.09984919	273.4	-0.1442351	273.4	-0.1059794	273.4	-0.10017	273.4	-0.07326397	273.4	-0.03369692	273.4	-0.03865055	273.4	-0.1016179
273.59	1.476167	273.59	1.323102	273.59	1.347218	273.59	1.27514	273.59	1.207282	273.59	1.209358	273.59	1.217344	273.59	-0.1227636	273.6	-0.1007823	273.6	-0.1383875	273.6	-0.09980289	273.6	-0.09854253	273.6	-0.07819304	273.6	-0.03594694	273.6	-0.04356153	273.6	-0.1021166
273.8	1.474496	273.8	1.319154	273.8	1.345727	273.8	1.274144	273.8	1.20638	273.8	1.210041	273.8	1.216639	273.8	-0.1270115	273.8	-0.1013477	273.8	-0.1411003	273.8	-0.0994657	273.8	-0.1022309	273.8	-0.07795227	273.8	-0.03582944	273.8	-0.04810818	273.8	-0.1026979
273.99	1.479593	273.99	1.317413	273.99	1.343203	273.99	1.274651	273.99	1.205408	273.99	1.212023	273.99	1.220554	273.99	-0.1311097	274	-0.1042763	274	-0.1405876	274	-0.09626049	274	-0.09961531	274	-0.07448085	274	-0.03587287	274	-0.04388946	274	-0.09925413
274.2	1.47532	274.2	1.321462	274.2	1.343498	274.2	1.274185	274.2	1.209379	274.2	1.207944	274.2	1.216721	274.2	-0.123742	274.2	-0.1002904	274.2	-0.1356401	274.2	-0.1020978	274.2	-0.1022587	274.2	-0.07402609	274.2	-0.03296865	274.2	-0.03877409	274.2	-0.09520072
274.39	1.474449	274.39	1.319396	274.39	1.348543	274.39	1.276427	274.39	1.210714	274.39	1.214326	274.39	1.22172	274.39	-0.1237946	274.4	-0.09885133	274.4	-0.1380407	274.4	-0.1050441	274.4	-0.09587511	274.4	-0.07492849	274.4	-0.03541376	274.4	-0.04601837	274.4	-0.1008108
274.6	1.480664	274.6	1.319193	274.6	1.348041	274.6	1.275014	274.6	1.207628	274.6	1.214085	274.6	1.227562	274.6	-0.1290633	274.6	-0.1037418	274.6	-0.137623	274.6	-0.1021817	274.6	-0.09564392	274.6	-0.07370579	274.6	-0.03291988	274.6	-0.04183506	274.6	-0.09766734
274.79	1.481757	274.79	1.318131	274.79	1.348565	274.79	1.275898	274.79	1.205516	274.79	1.212103	274.79	1.218668	274.79	-0.1274944	274.8	-0.09581772	274.8	-0.1411293	274.8	-0.1010771	274.8	-0.0960172	274.8	-0.07409228	274.8	-0.03339785	274.8	-0.04693074	274.8	-0.0948312
275	1.479213	275	1.318636	275	1.348609	275	1.272978	275	1.203778	275	1.211959	275	1.223671	275	-0.1269255	275	-0.1032884	275	-0.1393901	275	-0.1004111	275	-0.09776813	275	-0.07811248	275	-0.03479408	275	-0.04438355	275	-0.09686004
275.2	1.481392	275.2	1.321298	275.2	1.348039	275.2	1.278512	275.2	1.210007	275.2	1.215878	275.2	1.222826	275.2	-0.125697	275.2	-0.1051293	275.2	-0.1350411	275.2	-0.1010252	275.2	-0.09580547	275.2	-0.0793445	275.2	-0.03191006	275.2	-0.04246633	275.2	-0.09792472
275.4	1.484134	275.4	1.32172	275.4	1.351075	275.4	1.278055	275.4	1.208398	275.4	1.209878	275.4	1.224227	275.4	-0.132293	275.4	-0.1031689	275.4	-0.1381555	275.4	-0.1026449	275.4	-0.09684885	275.4	-0.07803275	275.4	-0.03436226	275.4	-0.04625338	275.4	-0.0987986
275.6	1.482139	275.6	1.320059	275.6	1.349418	275.6	1.277509	275.6	1.20778	275.6	1.212648	275.6	1.224146	275.6	-0.1266375	275.6	-0.1011195	275.6	-0.1363722	275.6	-0.1025641	275.6	-0.09469548	275.6	-0.07269356	275.6	-0.0327528	275.6	-0.03870726	275.6	-0.09796706
275.8	1.481754	275.8	1.32482	275.8	1.354706	275.8	1.277706	275.8	1.211058	275.8	1.210337	275.8	1.221268	275.8	-0.1266576	275.8	-0.1043507	275.8	-0.1378556	275.8	-0.09806292	275.8	-0.0975076	275.8	-0.07358348	275.8	-0.0295289	275.8	-0.04547603	275.8	-0.09651084
275.99	1.483481	275.99	1.324832	275.99	1.349411	275.99	1.273889	275.99	1.205926	275.99	1.215354	275.99	1.224722	275.99	-0.127609	276	-0.1021676	276	-0.1377114	276	-0.09798671	276	-0.09915014	276	-0.0723168	276	-0.0350535	276	-0.04079967	276	-0.1001059
276.19	1.482049	276.19	1.318208	276.19	1.352234	276.19	1.276985	276.19	1.209111	276.19	1.210947	276.19	1.224828	276.19	-0.1297394	276.2	-0.1028256	276.2	-0.1378805	276.2	-0.1028493	276.2	-0.1008797	276.2	-0.07050522	276.2	-0.03449708	276.2	-0.04497512	276.2	-0.09863769
276.4	1.480406	276.4	1.321849	276.4	1.344324	276.4	1.279219	276.4	1.214861	276.4	1.210597	276.4	1.222067	276.4	-0.1265502	276.4	-0.101088	276.4	-0.1366723	276.4	-0.1033966	276.4	-0.09507773	276.4	-0.07466771	276.4	-0.03033574	276.4	-0.0417424	276.4	-0.0989745
276.59	1.482502	276.59	1.320214	276.59	1.354105	276.59	1.282749	276.59	1.215964	276.59	1.214077	276.59	1.219854	276.59	-0.1239301	276.6	-0.10205	276.6	-0.1384215	276.6	-0.1021061	276.6	-0.09756323	276.6	-0.07381031	276.6	-0.03240425	276.6	-0.03973926	276.6	-0.09729262
276.79	1.484155	276.79	1.326347	276.79	1.349031	276.79	1.279543	276.79	1.20763	276.79	1.21083	276.79	1.222903	276.79	-0.1228315	276.8	-0.09968822	276.8	-0.1373136	276.8	-0.09890348	276.8	-0.09731473	276.8	-0.07487629	276.8	-0.03630263	276.8	-0.04398302	276.8	-0.09475955
277	1.479979	277	1.321747	277	1.349739	277	1.279875	277	1.20986	277	1.214817	277	1.218087	277	-0.127302	277.01	-0.1016169	277.01	-0.1337469	277.01	-0.1014326	277.01	-0.0991765	277.01	-0.07419017	277.01	-0.0288497	277.01	-0.04653048	277.01	-0.1003166
277.2	1.483622	277.2	1.324362	277.2	1.35731	277.2	1.274572	277.2	1.21049	277.2	1.214019	277.2	1.222483	277.2	-0.1302767	277.2	-0.09950411	277.2	-0.1382361	277.2	-0.09996751	277.2	-0.09744078	277.2	-0.07613843	277.2	-0.032451	277.2	-0.04217251	277.2	-0.09582729
277.4	1.485425	277.4	1.327873	277.4	1.350377	277.4	1.277567	277.4	1.20589	277.4	1.216214	277.4	1.22264	277.4	-0.1271835	277.4	-0.09930718	277.4	-0.1373586	277.4	-0.09742109	277.4	-0.09690533	277.4	-0.0736945	277.4	-0.02860833	277.4	-0.04353049	277.4	-0.09588704
277.6	1.481082	277.6	1.325198	277.6	1.351709	277.6	1.279469	277.6	1.210992	277.6	1.216522	277.6	1.225747	277.6	-0.1262435	277.6	-0.09943149	277.6	-0.1371869	277.6	-0.101793	277.6	-0.09628455	277.6	-0.07754172	277.6	-0.0341359	277.6	-0.03855436	277.6	-0.09282388
277.79	1.487482	277.79	1.326828	277.79	1.354126	277.79	1.282785	277.79	1.21426	277.79	1.215539	277.79	1.226692	277.79	-0.1285256	277.8	-0.09948865	277.8	-0.1411028	277.8	-0.09738711	277.8	-0.09548279	277.8	-0.07436182	277.8	-0.03197937	277.8	-0.03998701	277.8	-0.1020973
278	1.487475	278	1.318995	278	1.353926	278	1.281191	278	1.213406	278	1.217249	278	1.220145	278	-0.1230307	278	-0.1018309	278	-0.137825	278	-0.1020493	278	-0.09511894	278	-0.07679054	278	-0.03305278	278	-0.03999506	278	-0.09548468
278.2	1.484892	278.2	1.325068	278.2	1.357291	278.2	1.280157	278.2	1.211874	278.2	1.215497	278.2	1.222101	278.2	-0.1239555	278.2	-0.1012235	278.2	-0.1397004	278.2	-0.09683412	278.2	-0.09669608	278.2	-0.07470983	278.2	-0.03154331	278.2	-0.03894351	278.2	-0.09569298
278.39	1.482436	278.39	1.324344	278.39	1.352826	278.39	1.277172	278.39	1.211343	278.39	1.214814	278.39	1.225499	278.39	-0.1247288	278.4	-0.09668469	278.4	-0.1365631	278.4	-0.1003457	278.4	-0.09330213	278.4	-0.07781076	278.4	-0.03428085	278.4	-0.03681798	278.4	-0.09891068
278.59	1.482398	278.59	1.327914	278.59	1.352306	278.59	1.280471	278.59	1.212663	278.59	1.216375	278.59	1.226125	278.59	-0.1290751	278.6	-0.09909858	278.6	-0.1377753	278.6	-0.1004498	278.6	-0.09562314	278.6	-0.07530558	278.6	-0.03159133	278.6	-0.03627183	278.6	-0.09866259
278.79	1.483591	278.79	1.325154	278.79	1.353539	278.79	1.282429	278.79	1.213038	278.79	1.21327	278.79	1.21948	278.79	-0.1259195	278.8	-0.09319461	278.8	-0.1387777	278.8	-0.09784083	278.8	-0.09661913	278.8	-0.07457225	278.8	-0.03654411	278.8	-0.04480919	278.8	-0.09784171
279	1.483496	279	1.326795	279	1.360022	279	1.27995	279	1.213729	279	1.214882	279	1.222685	279	-0.1278162	279	-0.1015462	279	-0.1361613	279	-0.09610542	279	-0.09590956	279	-0.07786774	279	-0.03338869	279	-0.04461857	279	-0.09601393
279.19	1.486765	279.19	1.333941	279.19	1.356956	279.19	1.283835	279.19	1.213758	279.19	1.211466	279.19	1.226338	279.19	-0.1251909	279.2	-0.09733649	279.2	-0.1388812	279.2	-0.0978926	279.2	-0.09472997	279.2	-0.07484718	279.2	-0.03513126	279.2	-0.04488508	279.2	-0.09405265
279.39	1.488134	279.39	1.32851	279.39	1.356908	279.39	1.280145	279.39	1.215145	279.39	1.216555	279.39	1.224898	279.39	-0.1221436	279.4	-0.09912143	279.4	-0.1352224	279.4	-0.10077	279.4	-0.09941564	279.4	-0.07433897	279.4	-0.0332092	279.4	-0.03794319	279.4	-0.09293274
279.6	1.493612	279.6	1.332202	279.6	1.356707	279.6	1.283498	279.6	1.21454	279.6	1.215808	279.6	1.225898	279.6	-0.1230771	279.6	-0.09437489	279.6	-0.1348173	279.6	-0.0980965	279.6	-0.09832317	279.6	-0.07559158	279.6	-0.03078653	279.6	-0.03585983	279.6	-0.09459018
279.79	1.49151	279.79	1.330205	279.79	1.357685	279.79	1.284969	279.79	1.211694	279.79	1.214026	279.79	1.223215	279.79	-0.1257978	279.8	-0.09812573	279.8	-0.1365878	279.8	-0.0999697	279.8	-0.09299194	279.8	-0.07211783	279.8	-0.03133456	279.8	-0.03974919	279.8	-0.09723034
279.99	1.491785	279.99	1.333859	279.99	1.354861	279.99	1.282001	279.99	1.215813	279.99	1.216922	279.99	1.226872	279.99	-0.1253772	280	-0.0992033	280	-0.1387373	280	-0.09861304	280	-0.0954506	280	-0.0731593	280	-0.03518626	280	-0.03813178	280	-0.09485256
280.19	1.488381	280.19	1.32856	280.19	1.357062	280.19	1.283177	280.19	1.21972	280.19	1.212875	280.19	1.225546	280.19	-0.1258761	280.2	-0.09997326	280.2	-0.1313651	280.2	-0.1002996	280.2	-0.09159904	280.2	-0.06957756	280.2	-0.03435067	280.2	-0.03769838	280.2	-0.1027624
280.39	1.491278	280.39	1.333291	280.39	1.35726	280.39	1.281654	280.39	1.215977	280.39	1.214599	280.39	1.225769	280.39	-0.1288605	280.4	-0.09986535	280.4	-0.1363186	280.4	-0.1006033	280.4	-0.09643488	280.4	-0.08056416	280.4	-0.03276027	280.4	-0.04110052	280.4	-0.09863494
280.6	1.493371	280.6	1.326613	280.6	1.355918	280.6	1.282859	280.6	1.213551	280.6	1.218242	280.6	1.223444	280.6	-0.1264455	280.6	-0.1006857	280.6	-0.1396404	280.6	-0.0994145	280.6	-0.09771346	280.6	-0.07034346	280.6	-0.03233841	280.6	-0.0443504	280.6	-0.1013399
280.8	1.496246	280.8	1.332115	280.8	1.362201	280.8	1.287439	280.8	1.211505	280.8	1.217534	280.8	1.229815	280.8	-0.1246889	280.8	-0.1029441	280.8	-0.1388037	280.8	-0.09828418	280.8	-0.0954401	280.8	-0.07483245	280.8	-0.03010201	280.8	-0.03980639	280.8	-0.09599134
280.99	1.490644	280.99	1.332388	280.99	1.362995	280.99	1.285185	280.99	1.213351	280.99	1.216798	280.99	1.223913	280.99	-0.1256126	281	-0.09788965	281	-0.1382478	281	-0.0957051	281	-0.09400076	281	-0.07154344	281	-0.02876313	281	-0.04269613	281	-0.09576552
281.19	1.489435	281.19	1.334177	281.19	1.356852	281.19	1.285483	281.19	1.213307	281.19	1.220773	281.19	1.223321	281.19	-0.1277154	281.2	-0.0973547	281.2	-0.1389048	281.2	-0.1036398	281.2	-0.09592704	281.2	-0.06634688	281.2	-0.03472955	281.2	-0.0423751	281.2	-0.09488747
281.4	1.492724	281.4	1.33387	281.4	1.359974	281.4	1.287133	281.4	1.214954	281.4	1.217336	281.4	1.225871	281.4	-0.1299237	281.4	-0.09197506	281.4	-0.1378846	281.4	-0.1028688	281.4	-0.09278892	281.4	-0.0730122	281.4	-0.03330382	281.4	-0.03891092	281.4	-0.09634503
281.59	1.492908	281.59	1.329902	281.59	1.361684	281.59	1.286381	281.59	1.215034	281.59	1.217498	281.59	1.228251	281.59	-0.1258763	281.6	-0.09554595	281.6	-0.1348625	281.6	-0.09708249	281.6	-0.09493959	281.6	-0.07544048	281.6	-0.02775229	281.6	-0.03792544	281.6	-0.09908865
281.79	1.491886	281.79	1.333436	281.79	1.359349	281.79	1.283835	281.79	1.218207	281.79	1.218907	281.79	1.226729	281.79	-0.1271938	281.8	-0.09449987	281.8	-0.1333902	281.8	-0.0985084	281.8	-0.09804913	281.8	-0.06973495	281.8	-0.03232864	281.8	-0.03874281	281.8	-0.09277383
281.99	1.491441	281.99	1.336245	281.99	1.359254	281.99	1.283164	281.99	1.219359	281.99	1.220875	281.99	1.223008	281.99	-0.1245373	282	-0.09591076	282	-0.1387525	282	-0.1016828	282	-0.0949686	282	-0.07418858	282	-0.03067712	282	-0.03709478	282	-0.09408005
282.2	1.491992	282.2	1.333158	282.2	1.357265	282.2	1.288878	282.2	1.216418	282.2	1.218566	282.2	1.229254	282.2	-0.1236245	282.2	-0.09107634	282.2	-0.1381681	282.2	-0.09862049	282.2	-0.09073871	282.2	-0.07298262	282.2	-0.02967175	282.2	-0.03954083	282.2	-0.09465335
282.39	1.494849	282.39	1.337341	282.39	1.35979	282.39	1.284104	282.39	1.219843	282.39	1.220789	282.39	1.228082	282.39	-0.1249762	282.4	-0.09676678	282.4	-0.139642	282.4	-0.1002966	282.4	-0.09674297	282.4	-0.07198158	282.4	-0.0311868	282.4	-0.04085378	282.4	-0.0915181
282.6	1.494639	282.6	1.332941	282.6	1.362001	282.6	1.286417	282.6	1.223875	282.6	1.220673	282.6	1.22258	282.6	-0.1286913	282.6	-0.09323239	282.6	-0.1342627	282.6	-0.09894954	282.6	-0.0953166	282.6	-0.07212123	282.6	-0.0270438	282.6	-0.0402075	282.6	-0.09594756
282.79	1.492259	282.79	1.333088	282.79	1.364516	282.79	1.290179	282.79	1.21678	282.79	1.220234	282.79	1.226182	282.79	-0.1266377	282.8	-0.09775031	282.8	-0.138422	282.8	-0.09650623	282.8	-0.09285332	282.8	-0.0687714	282.8	-0.0294699	282.8	-0.04042024	282.8	-0.1004347
282.99	1.491845	282.99	1.337036	282.99	1.360543	282.99	1.286923	282.99	1.219102	282.99	1.220924	282.99	1.230519	282.99	-0.1258117	283	-0.09791343	283	-0.1361731	283	-0.09471592	283	-0.09787234	283	-0.06805972	283	-0.03004187	283	-0.03561714	283	-0.09876027
283.19	1.493112	283.19	1.337799	283.19	1.358615	283.19	1.287164	283.19	1.222166	283.19	1.225658	283.19	1.227945	283.19	-0.1265844	283.2	-0.09742212	283.2	-0.1319849	283.2	-0.100157	283.2	-0.09743041	283.2	-0.07280621	283.2	-0.02912702	283.2	-0.03863123	283.2	-0.09328642
283.39	1.492332	283.39	1.337184	283.39	1.360863	283.39	1.294739	283.39	1.216471	283.39	1.219384	283.39	1.222911	283.39	-0.1273942	283.4	-0.09835846	283.4	-0.1322221	283.4	-0.09798118	283.4	-0.09274194	283.4	-0.07012352	283.4	-0.03219383	283.4	-0.04177658	283.4	-0.09425902
283.59	1.500413	283.59	1.335975	283.59	1.367012	283.59	1.286882	283.59	1.216795	283.59	1.217748	283.59	1.225566	283.59	-0.1270436	283.6	-0.09679846	283.6	-0.1353303	283.6	-0.09687097	283.6	-0.09218324	283.6	-0.0754391	283.6	-0.03001679	283.6	-0.03817303	283.6	-0.09878515
283.79	1.491487	283.79	1.343646	283.79	1.365008	283.79	1.289286	283.79	1.220427	283.79	1.219132	283.79	1.229868	283.79	-0.123123	283.8	-0.09769386	283.8	-0.137728	283.8	-0.09674942	283.8	-0.09293014	283.8	-0.06733169	283.8	-0.03214786	283.8	-0.03525564	283.8	-0.09461698
283.99	1.500542	283.99	1.338523	283.99	1.362272	283.99	1.286178	283.99	1.220829	283.99	1.219699	283.99	1.228719	283.99	-0.1236611	284	-0.09418308	284	-0.136786	284	-0.1008612	284	-0.09189228	284	-0.07059087	284	-0.030208	284	-0.03661743	284	-0.09203576
284.2	1.495982	284.2	1.339446	284.2	1.363257	284.2	1.288584	284.2	1.218919	284.2	1.221612	284.2	1.23354	284.2	-0.1263038	284.2	-0.09892794	284.2	-0.1312591	284.2	-0.102816	284.2	-0.09112624	284.2	-0.06798211	284.2	-0.03123348	284.2	-0.04171109	284.2	-0.09411466
284.39	1.498895	284.39	1.341577	284.39	1.365428	284.39	1.291697	284.39	1.218606	284.39	1.222372	284.39	1.226849	284.39	-0.1252357	284.4	-0.0951929	284.4	-0.1344587	284.4	-0.09945973	284.4	-0.09182537	284.4	-0.07167244	284.4	-0.02901237	284.4	-0.03555274	284.4	-0.0921995
284.59	1.4988	284.59	1.339253	284.59	1.366353	284.59	1.289517	284.59	1.219897	284.59	1.224843	284.59	1.229425	284.59	-0.1279185	284.6	-0.09904505	284.6	-0.130707	284.6	-0.09399904	284.6	-0.09316844	284.6	-0.06899335	284.6	-0.02657058	284.6	-0.03850087	284.6	-0.09234906
284.79	1.500987	284.79	1.341497	284.79	1.364751	284.79	1.294758	284.79	1.223455	284.79	1.222965	284.79	1.225502	284.79	-0.1242252	284.8	-0.09752727	284.8	-0.1384499	284.8	-0.09633788	284.8	-0.09518404	284.8	-0.0703475	284.8	-0.0308982	284.8	-0.03700611	284.8	-0.09047436
285	1.497658	285	1.337008	285	1.366196	285	1.286937	285	1.218589	285	1.220506	285	1.227762	285	-0.1229766	285	-0.09641351	285	-0.1329398	285	-0.0968672	285	-0.09003273	285	-0.07205198	285	-0.02896247	285	-0.03746197	285	-0.09021205
285.19	1.500493	285.19	1.336284	285.19	1.36387	285.19	1.288065	285.19	1.217679	285.19	1.222183	285.19	1.229162	285.19	-0.1200051	285.2	-0.09446485	285.2	-0.1360557	285.2	-0.09324294	285.2	-0.0896043	285.2	-0.06880311	285.2	-0.03091931	285.2	-0.03434529	285.2	-0.09720894
285.39	1.496644	285.39	1.341388	285.39	1.366005	285.39	1.290101	285.39	1.224077	285.39	1.221521	285.39	1.231175	285.39	-0.1301646	285.4	-0.09361979	285.4	-0.1295665	285.4	-0.09910374	285.4	-0.0902022	285.4	-0.06905246	285.4	-0.03350872	285.4	-0.03585019	285.4	-0.08867618
285.59	1.49962	285.59	1.34504	285.59	1.369419	285.59	1.29393	285.59	1.220259	285.59	1.217778	285.59	1.229	285.59	-0.1224808	285.6	-0.09224723	285.6	-0.1323463	285.6	-0.09015817	285.6	-0.0909318	285.6	-0.06822469	285.6	-0.02725349	285.6	-0.03720136	285.6	-0.09728943
285.79	1.501155	285.79	1.337984	285.79	1.361706	285.79	1.293285	285.79	1.222805	285.79	1.225383	285.79	1.228146	285.79	-0.1187539	285.8	-0.09552494	285.8	-0.1336568	285.8	-0.09635866	285.8	-0.09543912	285.8	-0.07458774	285.8	-0.02852307	285.8	-0.03799089	285.8	-0.09331156
285.99	1.500762	285.99	1.341706	285.99	1.366989	285.99	1.292331	285.99	1.222241	285.99	1.227385	285.99	1.226812	285.99	-0.125071	286	-0.09352428	286	-0.1309533	286	-0.09422474	286	-0.09134845	286	-0.06892218	286	-0.02663537	286	-0.03767767	286	-0.08881956
286.19	1.505027	286.19	1.339607	286.19	1.370644	286.19	1.295462	286.19	1.222758	286.19	1.222784	286.19	1.227354	286.19	-0.123885	286.2	-0.09322388	286.2	-0.1305689	286.2	-0.1008135	286.2	-0.09307396	286.2	-0.07055964	286.2	-0.03524521	286.2	-0.04040094	286.2	-0.09196486
286.39	1.500989	286.39	1.34115	286.39	1.368222	286.39	1.291761	286.39	1.225009	286.39	1.225686	286.39	1.232468	286.39	-0.124854	286.4	-0.09031713	286.4	-0.1371424	286.4	-0.09587046	286.4	-0.09226819	286.4	-0.06765109	286.4	-0.02968987	286.4	-0.03612379	286.4	-0.09474823
286.59	1.501315	286.59	1.340424	286.59	1.36851	286.59	1.292656	286.59	1.219814	286.59	1.22118	286.59	1.226807	286.59	-0.1237977	286.6	-0.08945323	286.6	-0.1342871	286.6	-0.0946158	286.6	-0.09024969	286.6	-0.0710724	286.6	-0.02870617	286.6	-0.03818221	286.6	-0.09189447
286.8	1.500258	286.8	1.342849	286.8	1.369478	286.8	1.296647	286.8	1.225402	286.8	1.222302	286.8	1.230405	286.8	-0.1224483	286.8	-0.09224429	286.8	-0.1314285	286.8	-0.09616707	286.8	-0.09057523	286.8	-0.0702884	286.8	-0.03129357	286.8	-0.03656257	286.8	-0.09338905
287	1.504319	287	1.341294	287	1.370862	287	1.292826	287	1.223393	287	1.22426	287	1.226978	287	-0.1181985	287	-0.0941964	287	-0.131715	287	-0.09072074	287	-0.09107676	287	-0.06567669	287	-0.03171914	287	-0.03585409	287	-0.092715
287.26	1.50246	287.26	1.344042	287.26	1.371877	287.26	1.290992	287.26	1.22275	287.26	1.226942	287.26	1.226279	287.26	-0.1201005	287.2	-0.09678964	287.2	-0.1325085	287.2	-0.09682178	287.2	-0.08866215	287.2	-0.06693497	287.2	-0.02905096	287.2	-0.04076182	287.2	-0.09141812
287.44	1.501521	287.44	1.340922	287.44	1.372024	287.44	1.294763	287.44	1.223121	287.44	1.221755	287.44	1.231049	287.44	-0.1266127	287.4	-0.09826458	287.4	-0.1346276	287.4	-0.09380879	287.4	-0.09644485	287.4	-0.06722535	287.4	-0.02419026	287.4	-0.0422355	287.4	-0.09455778
287.6	1.504388	287.6	1.347453	287.6	1.369841	287.6	1.291331	287.6	1.224084	287.6	1.220269	287.6	1.228432	287.6	-0.1202381	287.6	-0.09540986	287.6	-0.1343946	287.6	-0.09950539	287.6	-0.09155202	287.6	-0.06676541	287.6	-0.02913636	287.6	-0.03641042	287.6	-0.09091453
287.8	1.506111	287.8	1.340699	287.8	1.368432	287.8	1.293115	287.8	1.22451	287.8	1.223044	287.8	1.23204	287.8	-0.1264556	287.8	-0.0940396	287.8	-0.1314649	287.8	-0.09578887	287.8	-0.09026337	287.8	-0.07284835	287.8	-0.03050862	287.8	-0.03511706	287.8	-0.09501372
288	1.505252	288	1.344002	288	1.36869	288	1.294278	288	1.228182	288	1.222743	288	1.2293	288	-0.1230842	288	-0.09534056	288	-0.1317284	288	-0.09136682	288	-0.09269663	288	-0.0658757	288	-0.02824072	288	-0.03913274	288	-0.09173512
288.2	1.502743	288.2	1.342846	288.2	1.37273	288.2	1.297375	288.2	1.226672	288.2	1.22006	288.2	1.22945	288.2	-0.1246047	288.2	-0.09596844	288.2	-0.1293512	288.2	-0.09662618	288.2	-0.09430351	288.2	-0.06510012	288.2	-0.02423748	288.2	-0.03692038	288.2	-0.08921385
288.4	1.505635	288.4	1.350631	288.4	1.370987	288.4	1.297282	288.4	1.224019	288.4	1.223614	288.4	1.233613	288.4	-0.1260435	288.4	-0.09590042	288.4	-0.1346052	288.4	-0.09625953	288.4	-0.09445266	288.4	-0.06881508	288.4	-0.02992239	288.4	-0.04210616	288.4	-0.08786038
288.6	1.503098	288.6	1.34868	288.6	1.368093	288.6	1.295869	288.6	1.223195	288.6	1.226437	288.6	1.231114	288.6	-0.1245136	288.6	-0.09344303	288.6	-0.1324023	288.6	-0.09565604	288.6	-0.09093097	288.6	-0.07106248	288.6	-0.02683704	288.6	-0.03656266	288.6	-0.09321775
288.8	1.505645	288.8	1.345804	288.8	1.3704	288.8	1.291976	288.8	1.226208	288.8	1.220551	288.8	1.230586	288.8	-0.1204169	288.8	-0.09696836	288.8	-0.133622	288.8	-0.09457389	288.8	-0.08309709	288.8	-0.06279308	288.8	-0.02843467	288.8	-0.03667395	288.8	-0.09738038
289	1.504564	289	1.342093	289	1.375869	289	1.297745	289	1.223117	289	1.222469	289	1.225734	289	-0.1222223	289	-0.09584352	289	-0.1399525	289	-0.0961943	289	-0.09381765	289	-0.06778555	289	-0.02967653	289	-0.03948189	289	-0.09348278
289.2	1.503732	289.2	1.34897	289.2	1.369041	289.2	1.300571	289.2	1.223929	289.2	1.223692	289.2	1.23011	289.2	-0.123873	289.2	-0.08991888	289.2	-0.1300731	289.2	-0.09480524	289.2	-0.08898871	289.2	-0.06937127	289.2	-0.02828975	289.2	-0.03542853	289.2	-0.09863747
289.4	1.502387	289.4	1.346397	289.4	1.374791	289.4	1.296063	289.4	1.22191	289.4	1.22519	289.4	1.233799	289.4	-0.1197384	289.4	-0.09307692	289.4	-0.1355717	289.4	-0.09675997	289.4	-0.09094032	289.4	-0.0719078	289.4	-0.02288413	289.4	-0.03302493	289.4	-0.08879296
289.6	1.507472	289.6	1.347686	289.6	1.370333	289.6	1.296746	289.6	1.225299	289.6	1.226262	289.6	1.231094	289.6	-0.1198057	289.6	-0.09239165	289.6	-0.1330112	289.6	-0.09466993	289.6	-0.08859721	289.6	-0.06185529	289.6	-0.02630668	289.6	-0.03592829	289.6	-0.09296153
289.8	1.508479	289.8	1.348447	289.8	1.369245	289.8	1.299786	289.8	1.223645	289.8	1.224802	289.8	1.233924	289.8	-0.122603	289.8	-0.09202729	289.8	-0.1328852	289.8	-0.09757236	289.8	-0.08956433	289.8	-0.07118901	289.8	-0.02150894	289.8	-0.03143505	289.8	-0.09315274
290	1.505684	290	1.3453	290	1.372511	290	1.298462	290	1.229101	290	1.22372	290	1.233163	290	-0.1205348	290	-0.09024873	290	-0.1324467	290	-0.09807408	290	-0.09238961	290	-0.06572281	290	-0.02477096	290	-0.03454116	290	-0.0943389
290.2	1.506709	290.2	1.353608	290.2	1.372634	290.2	1.295567	290.2	1.22774	290.2	1.224907	290.2	1.235314	290.2	-0.1211224	290.2	-0.09537829	290.2	-0.132201	290.2	-0.09231426	290.2	-0.09173004	290.2	-0.06625608	290.2	-0.02803339	290.2	-0.04086624	290.2	-0.09333062
290.4	1.508363	290.4	1.345959	290.4	1.375847	290.4	1.296135	290.4	1.221481	290.4	1.225239	290.4	1.229523	290.4	-0.1194834	290.4	-0.08759294	290.4	-0.1311285	290.4	-0.09172103	290.4	-0.09170251	290.4	-0.07474754	290.4	-0.02910928	290.4	-0.0371502	290.4	-0.1004945
290.6	1.50377	290.6	1.344806	290.6	1.37613	290.6	1.295283	290.6	1.225523	290.6	1.229747	290.6	1.230547	290.6	-0.12281	290.6	-0.09393169	290.6	-0.1327901	290.6	-0.09424586	290.6	-0.09023835	290.6	-0.07396367	290.6	-0.02994717	290.6	-0.03949536	290.6	-0.08938726
290.8	1.511742	290.8	1.348091	290.8	1.373882	290.8	1.300425	290.8	1.230553	290.8	1.230452	290.8	1.230375	290.8	-0.123417	290.8	-0.0966544	290.8	-0.1309441	290.8	-0.09567087	290.8	-0.09223322	290.8	-0.06447014	290.8	-0.02743222	290.8	-0.03466317	290.8	-0.0908178
290.99	1.509575	290.99	1.348806	290.99	1.377831	290.99	1.297438	290.99	1.228706	290.99	1.221177	290.99	1.231389	290.99	-0.1200861	291	-0.0984286	291	-0.1286998	291	-0.09452362	291	-0.08889846	291	-0.06488813	291	-0.02732793	291	-0.03282211	291	-0.09335515
291.21	1.508646	291.21	1.351577	291.21	1.37577	291.21	1.298289	291.21	1.224833	291.21	1.228944	291.21	1.232984	291.21	-0.12142	291.2	-0.09486649	291.2	-0.1316175	291.2	-0.09244286	291.2	-0.09034697	291.2	-0.06982929	291.2	-0.02386126	291.2	-0.03394489	291.2	-0.09102328
291.4	1.505856	291.4	1.35314	291.4	1.375417	291.4	1.299789	291.4	1.227468	291.4	1.227486	291.4	1.235321	291.4	-0.1208825	291.4	-0.09438674	291.4	-0.1300889	291.4	-0.09728135	291.4	-0.09122644	291.4	-0.06976601	291.4	-0.02826402	291.4	-0.03593168	291.4	-0.0910359
291.59	1.510917	291.59	1.35095	291.59	1.380556	291.59	1.300177	291.59	1.231896	291.59	1.225287	291.59	1.231915	291.59	-0.119057	291.6	-0.09443715	291.6	-0.1302773	291.6	-0.09430853	291.6	-0.08613423	291.6	-0.06860404	291.6	-0.02565134	291.6	-0.02829897	291.6	-0.09343689
291.79	1.508897	291.79	1.353942	291.79	1.378324	291.79	1.300361	291.79	1.226886	291.79	1.22791	291.79	1.236428	291.79	-0.1220527	291.8	-0.09049699	291.8	-0.1297296	291.8	-0.09437222	291.8	-0.08829036	291.8	-0.06385177	291.8	-0.0249193	291.8	-0.03434418	291.8	-0.09019824
292	1.511558	292	1.351919	292	1.377783	292	1.298544	292	1.228593	292	1.22523	292	1.234275	292	-0.1171568	292	-0.09460251	292	-0.1327729	292	-0.09449203	292	-0.08685252	292	-0.06744073	292	-0.02381931	292	-0.03601697	292	-0.09075727
292.19	1.514468	292.19	1.352588	292.19	1.380074	292.19	1.301113	292.19	1.222025	292.19	1.229564	292.19	1.234379	292.19	-0.1207662	292.2	-0.09564557	292.2	-0.131495	292.2	-0.09192508	292.2	-0.08724799	292.2	-0.06552744	292.2	-0.02660624	292.2	-0.03420402	292.2	-0.08966445
292.39	1.511025	292.39	1.355446	292.39	1.381077	292.39	1.301402	292.39	1.229523	292.39	1.225992	292.39	1.235246	292.39	-0.1201049	292.4	-0.09514799	292.4	-0.1305737	292.4	-0.09139253	292.4	-0.09101547	292.4	-0.06999114	292.4	-0.02320387	292.4	-0.03148562	292.4	-0.09141622
292.6	1.511086	292.6	1.353596	292.6	1.381956	292.6	1.29932	292.6	1.228038	292.6	1.231011	292.6	1.238495	292.6	-0.1182089	292.6	-0.09063019	292.6	-0.1311969	292.6	-0.09341886	292.6	-0.09029932	292.6	-0.07044936	292.6	-0.02792328	292.6	-0.03372326	292.6	-0.08775107
292.8	1.514494	292.8	1.353981	292.8	1.377313	292.8	1.303133	292.8	1.23211	292.8	1.22675	292.8	1.23814	292.8	-0.1194283	292.8	-0.09413562	292.8	-0.1308245	292.8	-0.094548	292.8	-0.08879011	292.8	-0.06561927	292.8	-0.02878315	292.8	-0.03553144	292.8	-0.09363135
293	1.511267	293	1.352953	293	1.377797	293	1.302576	293	1.228698	293	1.22582	293	1.233443	293	-0.1209541	293	-0.09208455	293	-0.1334616	293	-0.09191046	293	-0.08717264	293	-0.06841501	293	-0.02743195	293	-0.03261562	293	-0.09088136
293.2	1.513541	293.2	1.356203	293.2	1.37688	293.2	1.302178	293.2	1.232961	293.2	1.228536	293.2	1.232166	293.2	-0.1203516	293.2	-0.08793837	293.2	-0.1310839	293.2	-0.09104744	293.2	-0.09512704	293.2	-0.0693569	293.2	-0.02639902	293.2	-0.03479579	293.2	-0.09174668
293.39	1.513682	293.39	1.350423	293.39	1.379576	293.39	1.301528	293.39	1.22958	293.39	1.231582	293.39	1.232866	293.39	-0.1194302	293.4	-0.09243316	293.4	-0.133177	293.4	-0.09506903	293.4	-0.08639152	293.4	-0.06812812	293.4	-0.02092026	293.4	-0.04129086	293.4	-0.08893776
293.6	1.512955	293.6	1.351175	293.6	1.383201	293.6	1.302502	293.6	1.232038	293.6	1.227043	293.6	1.233369	293.6	-0.1210179	293.6	-0.09046648	293.6	-0.1297494	293.6	-0.09042304	293.6	-0.08713623	293.6	-0.064905	293.6	-0.02510911	293.6	-0.03310381	293.6	-0.08670265
293.8	1.511575	293.8	1.357939	293.8	1.378779	293.8	1.301486	293.8	1.23479	293.8	1.227799	293.8	1.227882	293.8	-0.1189231	293.8	-0.08845723	293.8	-0.1282062	293.8	-0.09259441	293.8	-0.08941072	293.8	-0.06845178	293.8	-0.02833473	293.8	-0.03480362	293.8	-0.08931797
294	1.513409	294	1.357938	294	1.384129	294	1.300793	294	1.23051	294	1.229248	294	1.232149	294	-0.1190783	294	-0.08683635	294	-0.1273208	294	-0.09401631	294	-0.08632138	294	-0.06782925	294	-0.02639662	294	-0.03850883	294	-0.09238099
294.2	1.512692	294.2	1.353434	294.2	1.380656	294.2	1.300838	294.2	1.234544	294.2	1.231641	294.2	1.230177	294.2	-0.1146334	294.2	-0.09178464	294.2	-0.1306852	294.2	-0.09499732	294.2	-0.08739379	294.2	-0.06678278	294.2	-0.0266995	294.2	-0.03338449	294.2	-0.09124459
294.4	1.512631	294.4	1.355394	294.4	1.377507	294.4	1.306695	294.4	1.236943	294.4	1.22806	294.4	1.234687	294.4	-0.1197516	294.4	-0.0901011	294.4	-0.1301987	294.4	-0.09408654	294.4	-0.08428022	294.4	-0.07195736	294.4	-0.02278275	294.4	-0.03527899	294.4	-0.08981103
294.6	1.517885	294.6	1.357231	294.6	1.382865	294.6	1.305041	294.6	1.231339	294.6	1.230215	294.6	1.234024	294.6	-0.1192379	294.6	-0.09040233	294.6	-0.1299396	294.6	-0.09351331	294.6	-0.08790768	294.6	-0.0688335	294.6	-0.02216815	294.6	-0.03548513	294.6	-0.09220415
294.8	1.516008	294.8	1.355126	294.8	1.380378	294.8	1.30636	294.8	1.228804	294.8	1.23301	294.8	1.234727	294.8	-0.1222536	294.8	-0.09064591	294.8	-0.1285399	294.8	-0.08987119	294.8	-0.08968475	294.8	-0.06469595	294.8	-0.0245664	294.8	-0.03168145	294.8	-0.09173182
295	1.518851	295	1.357814	295	1.386546	295	1.309992	295	1.23204	295	1.231516	295	1.23807	295	-0.1211534	295	-0.09078461	295	-0.1314333	295	-0.08896726	295	-0.08554555	295	-0.06633357	295	-0.02788071	295	-0.0338366	295	-0.08988223
295.2	1.511915	295.2	1.359506	295.2	1.387949	295.2	1.306894	295.2	1.233906	295.2	1.227549	295.2	1.235152	295.2	-0.117698	295.2	-0.0910257	295.2	-0.1302992	295.2	-0.09134548	295.2	-0.08963935	295.2	-0.06686164	295.2	-0.0260375	295.2	-0.03751364	295.2	-0.09251869
295.39	1.517024	295.39	1.357582	295.39	1.387509	295.39	1.305964	295.39	1.232125	295.39	1.228647	295.39	1.238018	295.39	-0.1194961	295.4	-0.09348587	295.4	-0.1339516	295.4	-0.09390718	295.4	-0.09264496	295.4	-0.06429829	295.4	-0.02487418	295.4	-0.03799994	295.4	-0.09051768
295.6	1.515306	295.6	1.35568	295.6	1.383971	295.6	1.304942	295.6	1.23527	295.6	1.230035	295.6	1.231622	295.6	-0.1215011	295.6	-0.0876964	295.6	-0.1310927	295.6	-0.08888282	295.6	-0.08689436	295.6	-0.06641227	295.6	-0.0291039	295.6	-0.03948001	295.6	-0.09161545
295.79	1.521578	295.79	1.357171	295.79	1.38614	295.79	1.309287	295.79	1.229883	295.79	1.228264	295.79	1.236387	295.79	-0.1230856	295.8	-0.09379245	295.8	-0.1294611	295.8	-0.0945644	295.8	-0.09220785	295.8	-0.0679621	295.8	-0.02627571	295.8	-0.03311184	295.8	-0.09360242
296	1.518273	296	1.358354	296	1.383017	296	1.304635	296	1.231921	296	1.230555	296	1.235704	296	-0.1155556	296	-0.0933814	296	-0.1298377	296	-0.08905634	296	-0.08605237	296	-0.06579082	296	-0.02449219	296	-0.03575752	296	-0.08378593
296.19	1.52051	296.19	1.363051	296.19	1.386096	296.19	1.305688	296.19	1.237344	296.19	1.226777	296.19	1.240297	296.19	-0.1150712	296.2	-0.09596159	296.2	-0.1330593	296.2	-0.09383223	296.2	-0.08980853	296.2	-0.06611045	296.2	-0.02448571	296.2	-0.03153145	296.2	-0.08878144
296.39	1.521713	296.39	1.360107	296.39	1.387407	296.39	1.310603	296.39	1.229521	296.39	1.228197	296.39	1.236718	296.39	-0.1178188	296.4	-0.09350562	296.4	-0.1283209	296.4	-0.09106587	296.4	-0.09105995	296.4	-0.07062209	296.4	-0.02572369	296.4	-0.0359677	296.4	-0.08339838
296.6	1.52012	296.6	1.363414	296.6	1.383778	296.6	1.305346	296.6	1.23387	296.6	1.231268	296.6	1.236816	296.6	-0.1166199	296.6	-0.09084804	296.6	-0.1307195	296.6	-0.09259779	296.6	-0.08440262	296.6	-0.06348224	296.6	-0.02202337	296.6	-0.03130303	296.6	-0.08773175
296.8	1.519891	296.8	1.359112	296.8	1.39163	296.8	1.304851	296.8	1.235965	296.8	1.232537	296.8	1.233873	296.8	-0.1134	296.8	-0.09396318	296.8	-0.1300199	296.8	-0.08897221	296.8	-0.08814082	296.8	-0.06691866	296.8	-0.02380252	296.8	-0.03685201	296.8	-0.09133603
296.99	1.518597	296.99	1.359051	296.99	1.385807	296.99	1.309875	296.99	1.234701	296.99	1.230254	296.99	1.232939	296.99	-0.1236679	297	-0.09104139	297	-0.1265951	297	-0.0901919	297	-0.08776787	297	-0.06624483	297	-0.02727055	297	-0.03086305	297	-0.09407252
297.2	1.524153	297.2	1.358324	297.2	1.389831	297.2	1.304691	297.2	1.229922	297.2	1.230377	297.2	1.238074	297.2	-0.1190324	297.2	-0.09048419	297.2	-0.1234766	297.2	-0.09483796	297.2	-0.08856739	297.2	-0.06816464	297.2	-0.02620684	297.2	-0.03300759	297.2	-0.09011358
297.39	1.516844	297.39	1.365455	297.39	1.38638	297.39	1.306053	297.39	1.2364	297.39	1.237666	297.39	1.233944	297.39	-0.1237337	297.4	-0.08530945	297.4	-0.1251097	297.4	-0.08920544	297.4	-0.08750301	297.4	-0.05933559	297.4	-0.01926374	297.4	-0.03347998	297.4	-0.09033731
297.6	1.512583	297.6	1.359783	297.6	1.38903	297.6	1.306335	297.6	1.23531	297.6	1.232841	297.6	1.236715	297.6	-0.114696	297.6	-0.09067187	297.6	-0.133256	297.6	-0.08745864	297.6	-0.08880781	297.6	-0.06381989	297.6	-0.02727707	297.6	-0.03413092	297.6	-0.08664487
297.8	1.524148	297.8	1.359125	297.8	1.381261	297.8	1.30795	297.8	1.236113	297.8	1.237913	297.8	1.234534	297.8	-0.1162428	297.8	-0.08674776	297.8	-0.1299435	297.8	-0.08851875	297.8	-0.08699777	297.8	-0.0658654	297.8	-0.02402798	297.8	-0.03635618	297.8	-0.0894726
298	1.519996	298	1.363658	298	1.386964	298	1.307561	298	1.230013	298	1.2347	298	1.236834	298	-0.1142354	298	-0.09102255	298	-0.1316511	298	-0.0826754	298	-0.09017327	298	-0.06384985	298	-0.02393273	298	-0.03240969	298	-0.09011932
298.19	1.522717	298.19	1.362994	298.19	1.386364	298.19	1.305692	298.19	1.23693	298.19	1.23058	298.19	1.236952	298.19	-0.1222039	298.2	-0.08944622	298.2	-0.1268763	298.2	-0.0878713	298.2	-0.08358297	298.2	-0.06501278	298.2	-0.02803719	298.2	-0.03245541	298.2	-0.08836598
298.4	1.520566	298.4	1.361523	298.4	1.3894	298.4	1.309325	298.4	1.234992	298.4	1.234435	298.4	1.2374	298.4	-0.119951	298.4	-0.08594827	298.4	-0.1298979	298.4	-0.08881567	298.4	-0.09349368	298.4	-0.06769778	298.4	-0.02194564	298.4	-0.0328697	298.4	-0.08916782
298.59	1.522222	298.59	1.361243	298.59	1.39054	298.59	1.30955	298.59	1.235772	298.59	1.234625	298.59	1.233958	298.59	-0.1169574	298.6	-0.08778363	298.6	-0.131382	298.6	-0.08676744	298.6	-0.08665086	298.6	-0.06339805	298.6	-0.02294818	298.6	-0.03219503	298.6	-0.088698
298.8	1.524793	298.8	1.366557	298.8	1.388817	298.8	1.310997	298.8	1.240279	298.8	1.232721	298.8	1.239455	298.8	-0.1166736	298.8	-0.09134202	298.8	-0.1310795	298.8	-0.08883145	298.8	-0.08951744	298.8	-0.06401213	298.8	-0.0276244	298.8	-0.03502226	298.8	-0.09109707
298.99	1.522451	298.99	1.365145	298.99	1.392338	298.99	1.31441	298.99	1.233976	298.99	1.233847	298.99	1.239245	298.99	-0.1197244	299	-0.09165945	299	-0.1270662	299	-0.08633036	299	-0.09067071	299	-0.06443714	299	-0.02577212	299	-0.03238364	299	-0.08981422
299.2	1.527182	299.2	1.365287	299.2	1.388979	299.2	1.307623	299.2	1.233172	299.2	1.236938	299.2	1.238828	299.2	-0.1132429	299.2	-0.08943574	299.2	-0.1304089	299.2	-0.08799092	299.2	-0.09010041	299.2	-0.06276739	299.2	-0.02385547	299.2	-0.03365333	299.2	-0.08506361
299.39	1.525214	299.39	1.36462	299.39	1.391479	299.39	1.310445	299.39	1.236072	299.39	1.235698	299.39	1.238426	299.39	-0.1240696	299.4	-0.08963367	299.4	-0.1252972	299.4	-0.08947424	299.4	-0.08704551	299.4	-0.0663502	299.4	-0.02145563	299.4	-0.03259727	299.4	-0.08896726
299.59	1.524841	299.59	1.362277	299.59	1.387288	299.59	1.309468	299.59	1.233899	299.59	1.23366	299.59	1.237602	299.59	-0.1169668	299.6	-0.0902861	299.6	-0.1296006	299.6	-0.09292936	299.6	-0.08289949	299.6	-0.06447455	299.6	-0.02266594	299.6	-0.03286394	299.6	-0.08960018
299.8	1.523123	299.8	1.366888	299.8	1.390201	299.8	1.307419	299.8	1.23736	299.8	1.232669	299.8	1.236501	299.8	-0.1177568	299.8	-0.08695956	299.8	-0.1276611	299.8	-0.08548761	299.8	-0.08385313	299.8	-0.06505311	299.8	-0.02541167	299.8	-0.03198376	299.8	-0.08794005
300	1.522621	300	1.364576	300	1.393401	300	1.313357	300	1.231539	300	1.235821	300	1.237739	300	-0.121829	300	-0.09153318	300	-0.1314626	300	-0.08730729	300	-0.08605305	300	-0.06525631	300	-0.02217837	300	-0.02854853	300	-0.08978691
300.19	1.526145	300.19	1.366322	300.19	1.393679	300.19	1.309852	300.19	1.241109	300.19	1.23595	300.19	1.237377	300.19	-0.1178418	300.2	-0.09036221	300.2	-0.1297586	300.2	-0.09110663	300.2	-0.08662452	300.2	-0.06214891	300.2	-0.02036679	300.2	-0.03421488	300.2	-0.08370485
300.39	1.524942	300.39	1.365509	300.39	1.391199	300.39	1.313085	300.39	1.240109	300.39	1.232479	300.39	1.238275	300.39	-0.1145595	300.4	-0.09135132	300.4	-0.1247097	300.4	-0.09271518	300.4	-0.09368622	300.4	-0.06430565	300.4	-0.0253057	300.4	-0.0310515	300.4	-0.09048466
300.59	1.526312	300.59	1.365818	300.59	1.390723	300.59	1.314206	300.59	1.238631	300.59	1.232494	300.59	1.237914	300.59	-0.1139433	300.6	-0.08934174	300.6	-0.1347371	300.6	-0.09259077	300.6	-0.08640206	300.6	-0.06047033	300.6	-0.02051941	300.6	-0.03200983	300.6	-0.08784539
300.8	1.524511	300.8	1.370399	300.8	1.391279	300.8	1.315995	300.8	1.238626	300.8	1.233175	300.8	1.239349	300.8	-0.1153641	300.8	-0.0894605	300.8	-0.1289592	300.8	-0.09349012	300.8	-0.0916343	300.8	-0.06179788	300.8	-0.02276505	300.8	-0.03611806	300.8	-0.08531204
301	1.525374	301	1.364895	301	1.394141	301	1.311643	301	1.239745	301	1.234628	301	1.237002	301	-0.122151	301	-0.09074602	301	-0.1273507	301	-0.09048887	301	-0.08757249	301	-0.0659308	301	-0.01734124	301	-0.03425985	301	-0.09112434
301.2	1.521145	301.2	1.366631	301.2	1.392884	301.2	1.310741	301.2	1.237262	301.2	1.238605	301.2	1.236664	301.2	-0.1203179	301.2	-0.0858496	301.2	-0.1259962	301.2	-0.09082571	301.2	-0.08584229	301.2	-0.06558572	301.2	-0.02328056	301.2	-0.03348193	301.2	-0.08741288
301.39	1.523475	301.39	1.36844	301.39	1.386349	301.39	1.31451	301.39	1.23721	301.39	1.236919	301.39	1.24174	301.39	-0.1193994	301.4	-0.08396546	301.4	-0.1249938	301.4	-0.09082956	301.4	-0.08783261	301.4	-0.06698567	301.4	-0.02126221	301.4	-0.03872511	301.4	-0.08598849
301.59	1.530535	301.59	1.368002	301.59	1.392684	301.59	1.310584	301.59	1.238645	301.59	1.236637	301.59	1.234694	301.59	-0.1174147	301.6	-0.08690593	301.6	-0.1252687	301.6	-0.08765689	301.6	-0.08443774	301.6	-0.06574558	301.6	-0.02380683	301.6	-0.03573527	301.6	-0.08957046
301.79	1.524789	301.79	1.366732	301.79	1.399443	301.79	1.311798	301.79	1.237538	301.79	1.240273	301.79	1.234821	301.79	-0.1174467	301.8	-0.08202538	301.8	-0.1282474	301.8	-0.0904369	301.8	-0.08634806	301.8	-0.06299004	301.8	-0.02738402	301.8	-0.02723312	301.8	-0.08696609
301.99	1.528767	301.99	1.368464	301.99	1.396032	301.99	1.310755	301.99	1.240013	301.99	1.236032	301.99	1.239251	301.99	-0.1159186	302	-0.08533593	302	-0.1320946	302	-0.08646366	302	-0.08357201	302	-0.06535969	302	-0.02084984	302	-0.03613013	302	-0.08872271
302.19	1.522935	302.19	1.363665	302.19	1.391581	302.19	1.315077	302.19	1.239896	302.19	1.237516	302.19	1.241447	302.19	-0.1136096	302.2	-0.08793313	302.2	-0.125513	302.2	-0.0876506	302.2	-0.08813927	302.2	-0.06396822	302.2	-0.02539293	302.2	-0.0257731	302.2	-0.08952694
302.4	1.527257	302.4	1.367241	302.4	1.389868	302.4	1.311265	302.4	1.238787	302.4	1.234511	302.4	1.238159	302.4	-0.1206745	302.4	-0.08575075	302.4	-0.1246319	302.4	-0.08701566	302.4	-0.0879967	302.4	-0.06686945	302.4	-0.02208755	302.4	-0.03121004	302.4	-0.08876963
302.59	1.529741	302.59	1.36542	302.59	1.396404	302.59	1.314084	302.59	1.239223	302.59	1.233892	302.59	1.241455	302.59	-0.1196663	302.6	-0.09246082	302.6	-0.1276088	302.6	-0.09009295	302.6	-0.08400818	302.6	-0.06193249	302.6	-0.01872094	302.6	-0.03277299	302.6	-0.08409664
302.79	1.530274	302.79	1.370259	302.79	1.395938	302.79	1.31684	302.79	1.23894	302.79	1.238615	302.79	1.241079	302.79	-0.1190483	302.8	-0.08700514	302.8	-0.1256636	302.8	-0.08463833	302.8	-0.08679789	302.8	-0.0617435	302.8	-0.02269717	302.8	-0.03020566	302.8	-0.08595428
302.99	1.52686	302.99	1.37375	302.99	1.394054	302.99	1.314043	302.99	1.234337	302.99	1.233198	302.99	1.237686	302.99	-0.1168458	303	-0.08717171	303	-0.1300949	303	-0.08472527	303	-0.09132071	303	-0.06708359	303	-0.020782	303	-0.03074379	303	-0.08783958
303.2	1.529235	303.2	1.376287	303.2	1.40039	303.2	1.31752	303.2	1.24799	303.2	1.234514	303.2	1.244086	303.2	-0.1209442	303.2	-0.08792976	303.2	-0.1275436	303.2	-0.08788519	303.2	-0.08781444	303.2	-0.06438228	303.2	-0.01988714	303.2	-0.03372718	303.2	-0.08811151
303.39	1.528373	303.39	1.370495	303.39	1.398999	303.39	1.316961	303.39	1.24349	303.39	1.236602	303.39	1.246925	303.39	-0.1220348	303.4	-0.09179649	303.4	-0.1236512	303.4	-0.0880357	303.4	-0.08754942	303.4	-0.05954646	303.4	-0.02065917	303.4	-0.03296571	303.4	-0.08468641
303.59	1.535027	303.59	1.372172	303.59	1.397817	303.59	1.3173	303.59	1.239299	303.59	1.237434	303.59	1.241399	303.59	-0.1168294	303.6	-0.08947649	303.6	-0.1294671	303.6	-0.08589068	303.6	-0.08425759	303.6	-0.06367653	303.6	-0.02210856	303.6	-0.0336591	303.6	-0.08817232
303.79	1.533116	303.79	1.3717	303.79	1.395362	303.79	1.31589	303.79	1.237098	303.79	1.240526	303.79	1.239446	303.79	-0.1172429	303.8	-0.08890024	303.8	-0.1266563	303.8	-0.08733423	303.8	-0.08720624	303.8	-0.0646524	303.8	-0.02532883	303.8	-0.02975761	303.8	-0.08794941
303.99	1.528735	303.99	1.367584	303.99	1.400173	303.99	1.315504	303.99	1.235451	303.99	1.236524	303.99	1.24133	303.99	-0.1143625	304	-0.08628595	304	-0.1234465	304	-0.08966015	304	-0.08406835	304	-0.05904604	304	-0.02371096	304	-0.02643992	304	-0.08561982
304.19	1.526806	304.19	1.370943	304.19	1.398329	304.19	1.31721	304.19	1.242224	304.19	1.23606	304.19	1.240059	304.19	-0.1180379	304.2	-0.08877948	304.2	-0.1264779	304.2	-0.0876823	304.2	-0.0868424	304.2	-0.06813409	304.2	-0.02196494	304.2	-0.02841161	304.2	-0.08278834
304.39	1.529808	304.39	1.37391	304.39	1.401157	304.39	1.31445	304.39	1.24343	304.39	1.236328	304.39	1.241387	304.39	-0.1133777	304.4	-0.0912727	304.4	-0.1268652	304.4	-0.09295299	304.4	-0.08371817	304.4	-0.06236918	304.4	-0.0193484	304.4	-0.03408042	304.4	-0.08355216
304.59	1.52798	304.59	1.371997	304.59	1.396965	304.59	1.317843	304.59	1.242483	304.59	1.235606	304.59	1.239422	304.59	-0.1148885	304.6	-0.08898704	304.6	-0.1288144	304.6	-0.0888791	304.6	-0.08345631	304.6	-0.06167704	304.6	-0.0181097	304.6	-0.03005213	304.6	-0.08912872
304.79	1.531599	304.79	1.371242	304.79	1.392098	304.79	1.316617	304.79	1.239378	304.79	1.237384	304.79	1.237449	304.79	-0.1177236	304.8	-0.09046187	304.8	-0.1274851	304.8	-0.09105971	304.8	-0.08256817	304.8	-0.06499662	304.8	-0.01921116	304.8	-0.03074137	304.8	-0.0837013
305	1.532014	305	1.374701	305	1.394943	305	1.31952	305	1.244712	305	1.237827	305	1.242601	305	-0.1116789	305	-0.08906861	305	-0.1293237	305	-0.08842918	305	-0.08642052	305	-0.06057652	305	-0.02345966	305	-0.03239132	305	-0.08686423
305.19	1.53504	305.19	1.372178	305.19	1.3984	305.19	1.320423	305.19	1.245847	305.19	1.239121	305.19	1.243182	305.19	-0.1157357	305.2	-0.08196614	305.2	-0.1248513	305.2	-0.09054247	305.2	-0.08603731	305.2	-0.06190483	305.2	-0.01837709	305.2	-0.03012933	305.2	-0.08315549
305.39	1.529492	305.39	1.368733	305.39	1.399849	305.39	1.321312	305.39	1.243582	305.39	1.239372	305.39	1.240057	305.39	-0.1128039	305.4	-0.08743323	305.4	-0.1296415	305.4	-0.08521074	305.4	-0.08053417	305.4	-0.06127294	305.4	-0.01752597	305.4	-0.02698054	305.4	-0.08248312
305.59	1.537745	305.59	1.372919	305.59	1.401297	305.59	1.314962	305.59	1.24052	305.59	1.238211	305.59	1.243139	305.59	-0.1176284	305.6	-0.08673173	305.6	-0.1258586	305.6	-0.08925986	305.6	-0.08203947	305.6	-0.06014036	305.6	-0.02036868	305.6	-0.03282753	305.6	-0.08341357
305.79	1.532634	305.79	1.369719	305.79	1.402647	305.79	1.321693	305.79	1.247204	305.79	1.237514	305.79	1.240164	305.79	-0.1140945	305.8	-0.08291555	305.8	-0.1211814	305.8	-0.08581712	305.8	-0.08356882	305.8	-0.06401369	305.8	-0.02023168	305.8	-0.02690608	305.8	-0.0859114
305.99	1.528803	305.99	1.374746	305.99	1.400072	305.99	1.32248	305.99	1.245569	305.99	1.239053	305.99	1.241373	305.99	-0.1144156	306	-0.08765253	306	-0.126752	306	-0.08621363	306	-0.08490165	306	-0.06161736	306	-0.02028682	306	-0.02968302	306	-0.09039278
306.19	1.530903	306.19	1.371846	306.19	1.398396	306.19	1.320518	306.19	1.24031	306.19	1.243346	306.19	1.244926	306.19	-0.1176841	306.2	-0.08644108	306.2	-0.1261564	306.2	-0.08859282	306.2	-0.08483835	306.2	-0.06159116	306.2	-0.02196925	306.2	-0.02919573	306.2	-0.09037665
306.39	1.532723	306.39	1.374639	306.39	1.400832	306.39	1.319845	306.39	1.247043	306.39	1.240871	306.39	1.242945	306.39	-0.1156033	306.4	-0.08571527	306.4	-0.1218223	306.4	-0.08375964	306.4	-0.08473463	306.4	-0.06260795	306.4	-0.02155573	306.4	-0.03257921	306.4	-0.08273951
306.59	1.537895	306.59	1.371955	306.59	1.400115	306.59	1.317829	306.59	1.243353	306.59	1.239851	306.59	1.242314	306.59	-0.1127899	306.6	-0.0868758	306.6	-0.1293124	306.6	-0.0830114	306.6	-0.08197444	306.6	-0.05875733	306.6	-0.0227358	306.6	-0.02725411	306.6	-0.08457751
306.79	1.53578	306.79	1.374846	306.79	1.400942	306.79	1.31743	306.79	1.245148	306.79	1.241914	306.79	1.245841	306.79	-0.1146762	306.8	-0.08068955	306.8	-0.1258254	306.8	-0.08435858	306.8	-0.08127347	306.8	-0.06077827	306.8	-0.02116552	306.8	-0.03262731	306.8	-0.0875219
306.99	1.535076	306.99	1.376694	306.99	1.400768	306.99	1.317746	306.99	1.247509	306.99	1.239853	306.99	1.242502	306.99	-0.1134816	307	-0.0830932	307	-0.1269556	307	-0.08090262	307	-0.08739651	307	-0.06067062	307	-0.01786623	307	-0.0292804	307	-0.08851419
307.19	1.536485	307.19	1.370388	307.19	1.403766	307.19	1.321276	307.19	1.246235	307.19	1.237709	307.19	1.243907	307.19	-0.1159768	307.2	-0.08660837	307.2	-0.122149	307.2	-0.08673401	307.2	-0.08315846	307.2	-0.06487016	307.2	-0.01470835	307.2	-0.02751652	307.2	-0.08377028
307.39	1.535496	307.39	1.382865	307.39	1.40356	307.39	1.321195	307.39	1.243293	307.39	1.237411	307.39	1.239904	307.39	-0.1186041	307.4	-0.08352735	307.4	-0.1242024	307.4	-0.09170739	307.4	-0.08268784	307.4	-0.0611887	307.4	-0.02019748	307.4	-0.03300115	307.4	-0.08510908
307.6	1.534287	307.6	1.374719	307.6	1.40627	307.6	1.327135	307.6	1.245694	307.6	1.235926	307.6	1.241434	307.6	-0.1161415	307.6	-0.08622691	307.6	-0.1256	307.6	-0.0828464	307.6	-0.0848956	307.6	-0.05989742	307.6	-0.0188545	307.6	-0.03073992	307.6	-0.09046875
307.79	1.542035	307.79	1.37718	307.79	1.408306	307.79	1.322325	307.79	1.249126	307.79	1.235302	307.79	1.248139	307.79	-0.1166003	307.8	-0.08804638	307.8	-0.1250995	307.8	-0.08424653	307.8	-0.08354694	307.8	-0.06519487	307.8	-0.02178357	307.8	-0.03008677	307.8	-0.0866314
308	1.538543	308	1.383006	308	1.404856	308	1.321777	308	1.243802	308	1.239743	308	1.247477	308	-0.1154396	308	-0.08941302	308	-0.1274727	308	-0.09078079	308	-0.08630483	308	-0.0625246	308	-0.0207717	308	-0.0299115	308	-0.08288725
308.2	1.536157	308.2	1.380657	308.2	1.403638	308.2	1.322894	308.2	1.24372	308.2	1.238567	308.2	1.242994	308.2	-0.1170071	308.2	-0.08684085	308.2	-0.1273932	308.2	-0.08666499	308.2	-0.08466616	308.2	-0.06140684	308.2	-0.02449907	308.2	-0.02501262	308.2	-0.08313096
308.4	1.536548	308.4	1.383533	308.4	1.40495	308.4	1.326912	308.4	1.246984	308.4	1.236778	308.4	1.240717	308.4	-0.1147549	308.4	-0.08842448	308.4	-0.1270677	308.4	-0.08927941	308.4	-0.08667535	308.4	-0.06709018	308.4	-0.01845885	308.4	-0.02788933	308.4	-0.08392376
308.59	1.540375	308.59	1.380399	308.59	1.401773	308.59	1.3224	308.59	1.247248	308.59	1.243309	308.59	1.244112	308.59	-0.1168064	308.6	-0.08727987	308.6	-0.1211074	308.6	-0.085673	308.6	-0.08666226	308.6	-0.06354205	308.6	-0.02063846	308.6	-0.02545155	308.6	-0.09106947
308.8	1.539762	308.8	1.377182	308.8	1.401312	308.8	1.319607	308.8	1.248873	308.8	1.237487	308.8	1.246637	308.8	-0.1095749	308.8	-0.08329298	308.8	-0.1224335	308.8	-0.08823039	308.8	-0.08131456	308.8	-0.06766	308.8	-0.02104889	308.8	-0.02740034	308.8	-0.08394539
308.99	1.543371	308.99	1.375973	308.99	1.403022	308.99	1.319315	308.99	1.243135	308.99	1.238133	308.99	1.244948	308.99	-0.110461	309	-0.08273465	309	-0.1222306	309	-0.08776457	309	-0.0796688	309	-0.05933482	309	-0.02093166	309	-0.03012395	309	-0.0830621
309.2	1.538634	309.2	1.378725	309.2	1.404467	309.2	1.322591	309.2	1.250678	309.2	1.245282	309.2	1.244232	309.2	-0.1134498	309.2	-0.08705346	309.2	-0.1245319	309.2	-0.08656763	309.2	-0.0871369	309.2	-0.06044868	309.2	-0.02616907	309.2	-0.02755093	309.2	-0.08237759
309.4	1.540087	309.4	1.377573	309.4	1.408311	309.4	1.32293	309.4	1.251426	309.4	1.24166	309.4	1.24831	309.4	-0.1190947	309.4	-0.08035585	309.4	-0.1216069	309.4	-0.08465302	309.4	-0.08557151	309.4	-0.06070422	309.4	-0.01763736	309.4	-0.02726459	309.4	-0.08681682
309.6	1.540358	309.6	1.380878	309.6	1.408166	309.6	1.325445	309.6	1.246112	309.6	1.239369	309.6	1.242314	309.6	-0.1157716	309.6	-0.0841426	309.6	-0.1256671	309.6	-0.0826781	309.6	-0.0844047	309.6	-0.0632534	309.6	-0.0190092	309.6	-0.02968905	309.6	-0.08822469
309.8	1.537543	309.8	1.378854	309.8	1.404025	309.8	1.322218	309.8	1.243417	309.8	1.243859	309.8	1.244609	309.8	-0.112363	309.8	-0.08265094	309.8	-0.1245037	309.8	-0.08344509	309.8	-0.08619712	309.8	-0.06316476	309.8	-0.02008277	309.8	-0.02919221	309.8	-0.0828791
310	1.539421	310	1.378538	310	1.405299	310	1.320286	310	1.248142	310	1.24561	310	1.245197	310	-0.1186879	310	-0.08251701	310	-0.1279175	310	-0.07964759	310	-0.08031197	310	-0.06239525	310	-0.01821101	310	-0.0285241	310	-0.08466098
310.2	1.54041	310.2	1.377963	310.2	1.40571	310.2	1.323909	310.2	1.251907	310.2	1.248622	310.2	1.245971	310.2	-0.118968	310.2	-0.08252607	310.2	-0.1228867	310.2	-0.08137224	310.2	-0.08016089	310.2	-0.06041802	310.2	-0.01876836	310.2	-0.0277611	310.2	-0.08269051
310.4	1.544385	310.4	1.381998	310.4	1.409431	310.4	1.322425	310.4	1.251379	310.4	1.238305	310.4	1.245499	310.4	-0.1140411	310.4	-0.08473049	310.4	-0.1214464	310.4	-0.08297046	310.4	-0.08359829	310.4	-0.06324711	310.4	-0.01681319	310.4	-0.02940012	310.4	-0.08847353
310.6	1.539267	310.6	1.378279	310.6	1.40871	310.6	1.330306	310.6	1.250264	310.6	1.244689	310.6	1.239473	310.6	-0.1139059	310.6	-0.08431238	310.6	-0.12407	310.6	-0.08571376	310.6	-0.08179685	310.6	-0.05714344	310.6	-0.01787071	310.6	-0.0318548	310.6	-0.08579978
310.8	1.539351	310.8	1.383838	310.8	1.410735	310.8	1.326359	310.8	1.250869	310.8	1.242104	310.8	1.244007	310.8	-0.1123711	310.8	-0.08005708	310.8	-0.1254086	310.8	-0.0796519	310.8	-0.08386111	310.8	-0.05559516	310.8	-0.01957033	310.8	-0.02848423	310.8	-0.08215108
311	1.542085	311	1.383506	311	1.407071	311	1.323437	311	1.247254	311	1.240963	311	1.249236	311	-0.1129211	311	-0.08801214	311	-0.1247888	311	-0.0852182	311	-0.08153052	311	-0.06079262	311	-0.02092003	311	-0.02432128	311	-0.08194671
311.22	1.541621	311.22	1.378742	311.22	1.406479	311.22	1.32477	311.22	1.246316	311.22	1.24336	311.22	1.250481	311.22	-0.112631	311.2	-0.08236415	311.2	-0.1251256	311.2	-0.08293044	311.2	-0.0835107	311.2	-0.05735917	311.2	-0.01818816	311.2	-0.03013007	311.2	-0.08508965
311.4	1.54283	311.4	1.382831	311.4	1.407366	311.4	1.323957	311.4	1.248398	311.4	1.245422	311.4	1.244382	311.4	-0.1105018	311.4	-0.08752418	311.4	-0.1203319	311.4	-0.0873649	311.4	-0.08164594	311.4	-0.05980819	311.4	-0.0210263	311.4	-0.0252003	311.4	-0.08637138
311.6	1.544761	311.6	1.389578	311.6	1.410807	311.6	1.323832	311.6	1.249243	311.6	1.239928	311.6	1.243696	311.6	-0.111665	311.6	-0.07826381	311.6	-0.1237466	311.6	-0.08514588	311.6	-0.08319777	311.6	-0.06106148	311.6	-0.01603982	311.6	-0.0249835	311.6	-0.08803625
311.8	1.541618	311.8	1.382204	311.8	1.415001	311.8	1.328	311.8	1.248418	311.8	1.239896	311.8	1.246824	311.8	-0.1116201	311.8	-0.08616827	311.8	-0.1257086	311.8	-0.08397965	311.8	-0.08800024	311.8	-0.06302378	311.8	-0.01832647	311.8	-0.02561789	311.8	-0.08727604
312	1.538144	312	1.383799	312	1.412309	312	1.329327	312	1.2499	312	1.242442	312	1.251991	312	-0.1107299	312	-0.08232573	312	-0.1260081	312	-0.08608529	312	-0.08429805	312	-0.05919526	312	-0.01746005	312	-0.02903493	312	-0.08472805
312.2	1.548164	312.2	1.387061	312.2	1.410566	312.2	1.32795	312.2	1.252489	312.2	1.238089	312.2	1.248149	312.2	-0.1131662	312.2	-0.08710615	312.2	-0.1203924	312.2	-0.08770435	312.2	-0.08605842	312.2	-0.05788956	312.2	-0.0154813	312.2	-0.03193967	312.2	-0.0820173
312.4	1.547664	312.4	1.388837	312.4	1.412266	312.4	1.326198	312.4	1.249983	312.4	1.244869	312.4	1.25142	312.4	-0.1142603	312.4	-0.08232154	312.4	-0.1255206	312.4	-0.08108695	312.4	-0.08210635	312.4	-0.05871685	312.4	-0.01827129	312.4	-0.02831959	312.4	-0.08744444
312.59	1.547406	312.59	1.382611	312.59	1.407081	312.59	1.324767	312.59	1.248292	312.59	1.246276	312.59	1.247077	312.59	-0.1155996	312.6	-0.08652348	312.6	-0.1264888	312.6	-0.08497043	312.6	-0.08065081	312.6	-0.06069359	312.6	-0.01451143	312.6	-0.02895128	312.6	-0.08518527
312.79	1.548091	312.79	1.383107	312.79	1.409138	312.79	1.325289	312.79	1.249533	312.79	1.245817	312.79	1.248128	312.79	-0.1150594	312.8	-0.08342452	312.8	-0.1222699	312.8	-0.08826713	312.8	-0.08501101	312.8	-0.05836769	312.8	-0.01368704	312.8	-0.03176815	312.8	-0.08466381
313	1.551151	313	1.384989	313	1.412058	313	1.328968	313	1.251504	313	1.248401	313	1.245793	313	-0.1119226	313	-0.0841102	313	-0.1182682	313	-0.08490699	313	-0.07775293	313	-0.06092272	313	-0.02045074	313	-0.0245867	313	-0.07917774
[truncated: 17,284 more rows]
