# Supplementary material for: Functional development of a V3/glycan-specific broadly neutralizing antibody isolated from a case of HIV superinfection
Source: eLife journal article supplement (doi:10.7554/elife.68110), 2021-07-15
Supplement: fig2-data2 [file RawData0.xls]

A3		B3		C3		D3		E3		F3		G3		H3		A4		B4		C4		D4		E4		F4		G4		H4
0	0	0	0	0	0	0	0	0	0	0	0	0	0	0	0	0	0	0	0	0	0	0	0	0	0	0	0	0	0	0	0
0.2	0.00360166	0.2	0.00161348	0.2	0.00412754	0.2	0.00448824	0.2	-0.00152231	0.2	-0.00324852	0.2	0.00255134	0.2	0.00129893	0.2	0.00670622	0.2	0.00191238	0.2	0.00295225	0.2	0.00095277	0.2	0.00051335	0.2	0.00218824	0.2	0.00442088	0.2	0.00032239
0.4	0.00651407	0.4	0.00663666	0.4	0.00703062	0.4	0.00471266	0.4	0.00114893	0.4	0.00388659	0.4	0.00187015	0.4	0.00054152	0.4	0.00669536	0.4	0.0045226	0.4	0.00173067	0.4	0.00013363	0.4	0.00337426	0.4	0.00076502	0.4	0.0050786	0.4	0.00102396
0.6	0.00759671	0.6	0.00450507	0.6	0.00409022	0.6	0.00313274	0.6	0.00323607	0.6	0.00198974	0.6	0.00621613	0.6	0.00964416	0.6	0.01003352	0.6	0.0020723	0.6	0.00310056	0.6	-0.00126469	0.6	0.00601513	0.6	0.00557467	0.6	0.00381428	0.6	0.00553877
0.8	0.00536799	0.8	0.00532272	0.8	0.00367002	0.8	0.0048011	0.8	0.00242044	0.8	0.00720419	0.8	0.0064487	0.8	0.00514075	0.8	0.01238422	0.8	0.00138736	0.8	0.00315475	0.8	0.00439898	0.8	0.00291916	0.8	0.00244763	0.8	0.00638598	0.8	0.00579334
1	0.00231717	1	0.00711588	1	0.00694497	1	0.00332737	1	0.00251153	1	0.00576203	1	0.00769918	1	0.00813125	1	0.01012663	1	0.00300902	1	0.01238019	1	0.00235404	1	0.00836441	1	0.00492715	1	0.00686675	1	0.00865353
1.2	0.00368142	1.2	0.0020577	1.2	0.00760733	1.2	0.00876502	1.2	-0.0017605	1.2	0.00021902	1.2	0.00517212	1.2	0.00749721	1.2	0.00967092	1.2	0.00693574	1.2	0.00794108	1.2	0.00351814	1.2	0.01068644	1.2	0.00797823	1.2	0.01101454	1.2	0.00256302
1.4	0.0058007	1.4	0.00928403	1.4	0.01031196	1.4	0.01022298	1.4	0.00337463	1.4	0.00503313	1.4	0.00360829	1.4	0.00945266	1.4	0.0139386	1.4	0.00962057	1.4	0.01188384	1.4	0.00401243	1.4	0.00711736	1.4	0.00587017	1.4	0.01219527	1.4	0.00460864
1.6	0.01114649	1.6	0.00582867	1.6	0.00862645	1.6	0.00898113	1.6	0.0072715	1.6	0.0061687	1.6	0.00473522	1.6	0.00843156	1.6	0.01270053	1.6	0.00506676	1.6	0.00734825	1.6	0.00703256	1.6	0.00826771	1.6	0.00720179	1.6	0.00813402	1.6	0.01048089
1.8	0.00573245	1.8	0.01029288	1.8	0.00920625	1.8	0.01045375	1.8	0.00424895	1.8	0.00542931	1.8	0.00672109	1.8	0.00900929	1.8	0.01884834	1.8	0.00607498	1.8	0.01033955	1.8	0.00557826	1.8	0.00797376	1.8	0.00886431	1.8	0.00992211	1.8	0.00513492
2	0.00813914	2	0.00990718	2	0.01122389	2	0.01340811	2	0.00650706	2	0.00552322	2	0.0027409	2	0.00870454	2	0.01275668	2	0.00472957	2	0.00779594	2	0.00390305	2	0.00450786	2	0.00979288	2	0.01169812	2	0.00592124
2.2	0.00939309	2.2	0.00888058	2.2	0.01152646	2.2	0.01169993	2.2	-0.00216518	2.2	0.00524136	2.2	0.00153353	2.2	0.01145931	2.2	0.01693295	2.2	0.00884346	2.2	0.01081593	2.2	0.00899902	2.2	0.01161405	2.2	0.0091375	2.2	0.00792404	2.2	0.01000402
2.4	0.00823239	2.4	0.00690382	2.4	0.00962539	2.4	0.00771105	2.4	0.0059466	2.4	0.00898414	2.4	0.00696261	2.4	0.00906044	2.4	0.01330661	2.4	0.00543752	2.4	0.00955012	2.4	0.00731274	2.4	0.01165617	2.4	0.00783111	2.4	0.01056987	2.4	0.01243481
2.6	0.00807512	2.6	0.00497251	2.6	0.01135314	2.6	0.00425933	2.6	0.00537028	2.6	0.00723835	2.6	0.00947308	2.6	0.01032677	2.6	0.01607224	2.6	0.00957579	2.6	0.01192481	2.6	0.00948007	2.6	0.01319038	2.6	0.00936687	2.6	0.01181115	2.6	0.00891789
2.8	0.0129232	2.8	0.01004815	2.8	0.00694522	2.8	0.01044494	2.8	0.00670433	2.8	0.00844505	2.8	0.00183967	2.8	0.00838099	2.8	0.01612701	2.8	0.00768777	2.8	0.01178295	2.8	0.00685244	2.8	0.01924798	2.8	0.01191283	2.8	0.01390484	2.8	0.00567082
3	0.00868914	3	0.00848002	3	0.01160962	3	0.01254218	3	0.00584233	3	0.01000553	3	0.00690168	3	0.01626227	3	0.01430841	3	0.00479157	3	0.01194027	3	0.01265312	3	0.01126483	3	0.01278767	3	0.01333297	3	0.00971694
3.2	0.01161846	3.2	0.00791842	3.2	0.00923483	3.2	0.01030717	3.2	0.00329691	3.2	0.00738029	3.2	0.00668077	3.2	0.01153208	3.2	0.01430925	3.2	0.00865317	3.2	0.00818864	3.2	0.00738572	3.2	0.0091088	3.2	0.01083136	3.2	0.01154182	3.2	0.01421563
3.4	0.00924965	3.4	0.010203	3.4	0.00838294	3.4	0.01059924	3.4	0.00601003	3.4	0.01127557	3.4	0.00900408	3.4	0.0167686	3.4	0.01649315	3.4	0.0093644	3.4	0.0088871	3.4	0.01076891	3.4	0.01434557	3.4	0.01277669	3.4	0.01248319	3.4	0.00944805
3.6	0.01282607	3.6	0.00512037	3.6	0.01205785	3.6	0.01246494	3.6	0.00461328	3.6	0.00773948	3.6	0.00837403	3.6	0.01544887	3.6	0.01574856	3.6	0.00721934	3.6	0.01678066	3.6	0.01043284	3.6	0.01506654	3.6	0.00717116	3.6	0.01254074	3.6	0.01139913
3.8	0.01372893	3.8	0.00875619	3.8	0.01048012	3.8	0.01360433	3.8	0.00953707	3.8	0.00797682	3.8	0.01339678	3.8	0.01130953	3.8	0.01899962	3.8	0.00450849	3.8	0.01314012	3.8	0.01013226	3.8	0.01016038	3.8	0.0119606	3.8	0.01293455	3.8	0.01083949
4	0.00821369	4	0.01522729	4	0.01024283	4	0.01291506	4	0.00868814	4	0.00821299	4	0.00870452	4	0.01093777	4	0.01723284	4	0.0071141	4	0.01493772	4	0.01055084	4	0.0144153	4	0.00768197	4	0.01228219	4	0.00798194
4.2	0.00780776	4.2	0.00908783	4.2	0.014742	4.2	0.01054065	4.2	0.00866353	4.2	0.01020248	4.2	0.00553849	4.2	0.01383877	4.2	0.01932755	4.2	0.01172231	4.2	0.01511781	4.2	0.01195029	4.2	0.01190389	4.2	0.01397812	4.2	0.01604461	4.2	0.01332097
4.4	0.0117818	4.4	0.00714096	4.4	0.01079713	4.4	0.01381717	4.4	0.00574114	4.4	0.01003938	4.4	0.0075537	4.4	0.01179049	4.4	0.01694557	4.4	0.01272706	4.4	0.01596361	4.4	0.01129244	4.4	0.01282808	4.4	0.0134692	4.4	0.01533968	4.4	0.01019907
4.6	0.01053964	4.6	0.01053546	4.6	0.01490406	4.6	0.0116703	4.6	0.00559613	4.6	0.00576643	4.6	0.00767416	4.6	0.01629128	4.6	0.01913304	4.6	0.00961862	4.6	0.01628022	4.6	0.0124105	4.6	0.01067632	4.6	0.0117182	4.6	0.01316739	4.6	0.00942415
4.8	0.01065068	4.8	0.00782988	4.8	0.01147965	4.8	0.00963656	4.8	0.00786543	4.8	0.00633567	4.8	0.01124114	4.8	0.01460114	4.8	0.01541403	4.8	0.00720609	4.8	0.01391132	4.8	0.01470314	4.8	0.01392821	4.8	0.00907281	4.8	0.01646995	4.8	0.01545975
5	0.01410139	5	0.00843083	5	0.01143361	5	0.01400118	5	0.01095967	5	0.01226997	5	0.00810691	5	0.0149962	5	0.01823894	5	0.00856482	5	0.01252917	5	0.01429517	5	0.01526145	5	0.01235887	5	0.01321778	5	0.01027114
5.2	0.00917869	5.2	0.0089942	5.2	0.01495122	5.2	0.01458067	5.2	0.00301843	5.2	0.01172882	5.2	0.00588928	5.2	0.01489883	5.2	0.01885821	5.2	0.01247015	5.2	0.00889767	5.2	0.01416901	5.2	0.01579772	5.2	0.0168123	5.2	0.01328896	5.2	0.01593226
5.4	0.00904708	5.4	0.00748943	5.4	0.01513042	5.4	0.01087365	5.4	0.00979611	5.4	0.01001552	5.4	0.00538202	5.4	0.01357956	5.4	0.01722487	5.4	0.00824476	5.4	0.01418242	5.4	0.01195451	5.4	0.01206154	5.4	0.01315524	5.4	0.01295371	5.4	0.00947206
5.6	0.01642128	5.6	0.01664473	5.6	0.01117403	5.6	0.01301426	5.6	0.00907898	5.6	0.0103793	5.6	0.00896942	5.6	0.01793351	5.6	0.01492706	5.6	0.01288676	5.6	0.01568026	5.6	0.01516502	5.6	0.01563569	5.6	0.01472481	5.6	0.01286033	5.6	0.00571622
5.8	0.01291538	5.8	0.00774781	5.8	0.01310624	5.8	0.01582728	5.8	0.00839712	5.8	0.00901119	5.8	0.00402158	5.8	0.01453721	5.8	0.01446497	5.8	0.01087858	5.8	0.01605828	5.8	0.01559072	5.8	0.01086428	5.8	0.0150964	5.8	0.01597446	5.8	0.01173212
6	0.00839281	6	0.00983932	6	0.01217879	6	0.01756771	6	0.00837158	6	0.01082673	6	0.00230501	6	0.01187411	6	0.0223659	6	0.00979291	6	0.01565158	6	0.01615627	6	0.01612706	6	0.01698124	6	0.01376313	6	0.0117389
6.2	0.01421629	6.2	0.01492799	6.2	0.01343119	6.2	0.01275004	6.2	0.00860271	6.2	0.01168325	6.2	0.01004393	6.2	0.01661063	6.2	0.02021218	6.2	0.00692596	6.2	0.01526059	6.2	0.01521182	6.2	0.01956047	6.2	0.01326224	6.2	0.01243692	6.2	0.01321432
6.4	0.01645222	6.4	0.00931791	6.4	0.01330032	6.4	0.01300858	6.4	0.00548161	6.4	0.00788263	6.4	0.01038919	6.4	0.01181228	6.4	0.01663711	6.4	0.00973103	6.4	0.01717265	6.4	0.01333431	6.4	0.01699939	6.4	0.0140989	6.4	0.01682327	6.4	0.00786677
6.6	0.00918164	6.6	0.01148586	6.6	0.01633168	6.6	0.01120612	6.6	0.00785051	6.6	0.01011501	6.6	0.00982226	6.6	0.01760847	6.6	0.01488659	6.6	0.00638772	6.6	0.0164395	6.6	0.01781639	6.6	0.01497905	6.6	0.01044192	6.6	0.01319597	6.6	0.01361403
6.8	0.01086812	6.8	0.01185432	6.8	0.01502172	6.8	0.01658445	6.8	0.01185619	6.8	0.01056302	6.8	0.00429778	6.8	0.01437795	6.8	0.01743909	6.8	0.01099618	6.8	0.01349934	6.8	0.01900356	6.8	0.0119248	6.8	0.01584959	6.8	0.013373	6.8	0.00915377
7	0.01249	7	0.0146754	7	0.01387654	7	0.01760138	7	0.00477787	7	0.00984468	7	0.0094607	7	0.01040622	7	0.02047567	7	0.00809705	7	0.01612792	7	0.01709674	7	0.0165328	7	0.0164455	7	0.01465887	7	0.0151036
7.2	0.01821719	7.2	0.00811544	7.2	0.01213527	7.2	0.01603222	7.2	0.00387587	7.2	0.01131394	7.2	0.00731912	7.2	0.01360065	7.2	0.01752935	7.2	0.01389696	7.2	0.01642385	7.2	0.01305864	7.2	0.01124329	7.2	0.0147076	7.2	0.01603625	7.2	0.01430654
7.4	0.01203191	7.4	0.01470889	7.4	0.01001055	7.4	0.00820239	7.4	0.00539435	7.4	0.00957497	7.4	0.00308546	7.4	0.01336162	7.4	0.02254503	7.4	0.00710664	7.4	0.01586381	7.4	0.01565138	7.4	0.01404519	7.4	0.01631183	7.4	0.01307008	7.4	0.01200958
7.6	0.01297349	7.6	0.01339636	7.6	0.01742295	7.6	0.01301193	7.6	0.01348937	7.6	0.00562815	7.6	0.00666595	7.6	0.01320205	7.6	0.01730428	7.6	0.00992666	7.6	0.01671859	7.6	0.01318	7.6	0.01705187	7.6	0.01499822	7.6	0.01306874	7.6	0.01510456
7.8	0.01175219	7.8	0.0095311	7.8	0.01209244	7.8	0.01116174	7.8	0.01333337	7.8	0.01278784	7.8	0.00642035	7.8	0.01164509	7.8	0.01699236	7.8	0.00657436	7.8	0.01519146	7.8	0.01313321	7.8	0.01360508	7.8	0.01285461	7.8	0.01528053	7.8	0.01153079
8	0.01296522	8	0.00855317	8	0.01598417	8	0.0103278	8	0.01256108	8	0.01001481	8	0.00478722	8	0.02130468	8	0.01413198	8	0.01200334	8	0.0163641	8	0.01562091	8	0.01888333	8	0.01660061	8	0.01761496	8	0.00876288
8.2	0.01498313	8.2	0.01354196	8.2	0.01272694	8.2	0.01644446	8.2	0.01008493	8.2	0.01252416	8.2	0.00938181	8.2	0.01574426	8.2	0.01924662	8.2	0.01222419	8.2	0.01618552	8.2	0.01664416	8.2	0.01456503	8.2	0.01027639	8.2	0.01793706	8.2	0.01205096
8.4	0.01276303	8.4	0.01117212	8.4	0.01518426	8.4	0.01264043	8.4	0.00851745	8.4	0.01228751	8.4	0.00820753	8.4	0.01680063	8.4	0.01554769	8.4	0.01479412	8.4	0.01571872	8.4	0.01404028	8.4	0.01887269	8.4	0.02104088	8.4	0.01574339	8.4	0.01493326
8.6	0.01125599	8.6	0.01074627	8.6	0.01390393	8.6	0.01867674	8.6	0.00663042	8.6	0.01229404	8.6	0.00581351	8.6	0.01453749	8.6	0.01818743	8.6	0.01241366	8.6	0.01388958	8.6	0.01223889	8.6	0.00981688	8.6	0.01741024	8.6	0.01332723	8.6	0.01314261
8.8	0.01383827	8.8	0.00732695	8.8	0.01128615	8.8	0.02089696	8.8	0.0077237	8.8	0.00818376	8.8	0.00941578	8.8	0.01469538	8.8	0.02168942	8.8	0.01254682	8.8	0.01849558	8.8	0.01772539	8.8	0.01596616	8.8	0.01835431	8.8	0.01497952	8.8	0.01268352
9	0.01433275	9	0.00956674	9	0.00956152	9	0.01807044	9	0.00974367	9	0.00568716	9	0.00297066	9	0.01235685	9	0.01999518	9	0.01157887	9	0.01757832	9	0.01590364	9	0.01600796	9	0.01469599	9	0.01391544	9	0.01290063
9.2	0.00875038	9.2	0.00949504	9.2	0.01369835	9.2	0.00858897	9.2	0.00931236	9.2	0.01096771	9.2	0.00809764	9.2	0.01681303	9.2	0.02247271	9.2	0.01406836	9.2	0.01932088	9.2	0.01634246	9.2	0.01695404	9.2	0.01710031	9.2	0.01387681	9.2	0.01252661
9.4	0.01296939	9.4	0.01119727	9.4	0.01575524	9.4	0.01307961	9.4	0.01275655	9.4	0.0134544	9.4	0.00656962	9.4	0.0134877	9.4	0.01642561	9.4	0.0084003	9.4	0.01324129	9.4	0.01698082	9.4	0.0148238	9.4	0.01650483	9.4	0.01784462	9.4	0.01328311
9.6	0.01830709	9.6	0.01021077	9.6	0.01268074	9.6	0.01634213	9.6	0.0073015	9.6	0.00741833	9.6	0.00294425	9.6	0.01387942	9.6	0.01994682	9.6	0.01464408	9.6	0.01542392	9.6	0.01459643	9.6	0.01610152	9.6	0.01871533	9.6	0.01671177	9.6	0.01536219
9.8	0.01218296	9.8	0.01258974	9.8	0.01278449	9.8	0.01325257	9.8	0.00072221	9.8	0.0088668	9.8	0.0105365	9.8	0.01208832	9.8	0.02239432	9.8	0.01429089	9.8	0.01600932	9.8	0.01595542	9.8	0.01615902	9.8	0.01678424	9.8	0.01780573	9.8	0.01789559
10	0.01342467	10	0.01205779	10	0.01402994	10	0.01496361	10	0.00998143	10	0.00906137	10	0.01059677	10	0.01427759	10	0.02336103	10	0.01410211	10	0.01727377	10	0.0140029	10	0.01781355	10	0.01980012	10	0.01386919	10	0.01314128
10.2	0.01069482	10.2	0.01356135	10.2	0.01161957	10.2	0.01556966	10.2	0.00993706	10.2	0.01070361	10.2	0.0016619	10.2	0.01857968	10.2	0.01740317	10.2	0.01072938	10.2	0.01831354	10.2	0.01498395	10.2	0.01606935	10.2	0.0201728	10.2	0.01236916	10.2	0.01526714
10.4	0.01109642	10.4	0.01269177	10.4	0.01639642	10.4	0.0201028	10.4	0.00639948	10.4	0.00619812	10.4	0.0074876	10.4	0.0159306	10.4	0.02284385	10.4	0.01300143	10.4	0.02091816	10.4	0.01484425	10.4	0.01754308	10.4	0.01916196	10.4	0.01458275	10.4	0.01288829
10.6	0.00954835	10.6	0.01207241	10.6	0.01119655	10.6	0.01259205	10.6	0.00764716	10.6	0.01237483	10.6	0.00658095	10.6	0.01264197	10.6	0.01691891	10.6	0.01336739	10.6	0.01488439	10.6	0.0108543	10.6	0.01547345	10.6	0.01939709	10.6	0.01816181	10.6	0.0160811
10.8	0.01435673	10.8	0.01271759	10.8	0.01320059	10.8	0.01155686	10.8	0.01128788	10.8	0.00984208	10.8	0.00744135	10.8	0.01452912	10.8	0.01893658	10.8	0.0150974	10.8	0.0189092	10.8	0.01355679	10.8	0.01997336	10.8	0.01187641	10.8	0.01847405	10.8	0.01485866
11	0.012576	11	0.00824644	11	0.01245826	11	0.01550107	11	0.01155157	11	0.01146306	11	0.00614095	11	0.01525721	11	0.01796746	11	0.01441581	11	0.01980796	11	0.01767599	11	0.01092368	11	0.01525546	11	0.01492588	11	0.01253301
11.2	0.01349607	11.2	0.01150495	11.2	0.01546732	11.2	0.01124726	11.2	0.0077359	11.2	0.01073772	11.2	0.0011432	11.2	0.0149922	11.2	0.02057924	11.2	0.01210259	11.2	0.01573002	11.2	0.01771182	11.2	0.01517344	11.2	0.01466552	11.2	0.01588082	11.2	0.01580539
11.4	0.01380975	11.4	0.01688791	11.4	0.01445792	11.4	0.01506015	11.4	0.01252117	11.4	0.00866617	11.4	0.00587182	11.4	0.01639098	11.41	0.0191434	11.41	0.01334836	11.41	0.01221261	11.41	0.01793292	11.41	0.01605489	11.41	0.01897367	11.41	0.01935169	11.41	0.0109686
11.6	0.0149158	11.6	0.01015473	11.6	0.01235458	11.6	0.01390789	11.6	0.0108625	11.6	0.01188902	11.6	0.00686984	11.6	0.01873881	11.6	0.02184917	11.6	0.01239753	11.6	0.01839858	11.6	0.01449539	11.6	0.01544506	11.6	0.01648139	11.6	0.02061791	11.6	0.01555841
11.8	0.00537643	11.8	0.01325715	11.8	0.00753009	11.8	0.01721234	11.8	0.00982705	11.8	0.00709846	11.8	0.00769656	11.8	0.01729954	11.8	0.01783871	11.8	0.01517017	11.8	0.02083156	11.8	0.01480036	11.8	0.01037196	11.8	0.01552103	11.8	0.01459375	11.8	0.01230887
12	0.0151057	12	0.0109403	12	0.01562358	12	0.01765264	12	0.00819308	12	0.0111785	12	0.00719152	12	0.01633747	12	0.01901693	12	0.00881809	12	0.0196404	12	0.01552808	12	0.01552076	12	0.01845122	12	0.02173226	12	0.00634496
12.2	0.00885508	12.2	0.01446423	12.2	0.01711459	12.2	0.01342507	12.2	0.00874518	12.2	0.00703146	12.2	0.0046536	12.2	0.01856016	12.2	0.02384944	12.2	0.01119801	12.2	0.01925174	12.2	0.01793478	12.2	0.01681852	12.2	0.0162	12.2	0.01896197	12.2	0.01092039
12.4	0.01006658	12.4	0.01086096	12.4	0.01169939	12.4	0.01488197	12.4	0.0098914	12.4	0.00761868	12.4	0.00746298	12.4	0.02010763	12.41	0.01943995	12.41	0.01167248	12.41	0.01893952	12.41	0.01307101	12.41	0.01828168	12.41	0.01861385	12.41	0.01473857	12.41	0.01129547
12.6	0.01358708	12.6	0.00932064	12.6	0.01191632	12.6	0.01992425	12.6	0.00745696	12.6	0.0133724	12.6	0.01195061	12.6	0.01656718	12.6	0.02251651	12.6	0.01340558	12.6	0.02158532	12.6	0.01492287	12.6	0.01473853	12.6	0.01297378	12.6	0.01484816	12.6	0.00923276
12.8	0.01076301	12.8	0.01026145	12.8	0.01088616	12.8	0.01317361	12.8	0.00961123	12.8	0.01103736	12.8	0.00415894	12.8	0.01186752	12.8	0.01760015	12.8	0.01335287	12.8	0.01749347	12.8	0.01598354	12.8	0.0170259	12.8	0.01843881	12.8	0.01777185	12.8	0.01065766
13	0.01219555	13	0.00877249	13	0.0128646	13	0.01507572	13	0.01082613	13	0.0130261	13	0.00147977	13	0.01169933	13	0.01930087	13	0.01178137	13	0.0164779	13	0.01630193	13	0.014942	13	0.01772743	13	0.01373776	13	0.01867718
13.2	0.00979269	13.2	0.0160506	13.2	0.01357913	13.2	0.01474754	13.2	0.00704631	13.2	0.00990834	13.2	0.00283538	13.2	0.02020935	13.2	0.02127546	13.2	0.01295867	13.2	0.01660134	13.2	0.01799388	13.2	0.01601176	13.2	0.01424132	13.2	0.01697657	13.2	0.01454252
13.4	0.01124359	13.4	0.01023538	13.4	0.01390455	13.4	0.01625571	13.4	0.00670352	13.4	0.01172804	13.4	0.01002895	13.4	0.01550499	13.4	0.02105247	13.4	0.0102023	13.4	0.01979354	13.4	0.01967706	13.4	0.02067006	13.4	0.0154274	13.4	0.01682202	13.4	0.01778804
13.6	0.00836797	13.6	0.0128689	13.6	0.01089337	13.6	0.02086673	13.6	0.01237546	13.6	0.00843319	13.6	0.0075761	13.6	0.01140347	13.6	0.01919093	13.6	0.01440767	13.6	0.01627154	13.6	0.01526197	13.6	0.01456847	13.6	0.01881506	13.6	0.01909744	13.6	0.00978902
13.8	0.01264756	13.8	0.00800445	13.8	0.01063693	13.8	0.01499823	13.8	0.01058682	13.8	0.01297349	13.8	0.00589552	13.8	0.01403755	13.8	0.01929453	13.8	0.01380834	13.8	0.01662239	13.8	0.01934436	13.8	0.01150219	13.8	0.0186537	13.8	0.01778963	13.8	0.0135026
14	0.01294899	14	0.0038285	14	0.0157811	14	0.01364262	14	0.01085586	14	0.01291653	14	0.00845232	14	0.01529439	14	0.01967921	14	0.01328393	14	0.02073105	14	0.02010584	14	0.01810769	14	0.01947053	14	0.01307049	14	0.0131012
14.2	0.01243693	14.2	0.00668211	14.2	0.01426049	14.2	0.01564942	14.2	0.00888277	14.2	0.00809814	14.2	0.00515422	14.2	0.01959383	14.2	0.02037983	14.2	0.01147032	14.2	0.01939835	14.2	0.01550542	14.2	0.0197594	14.2	0.01540034	14.2	0.01594576	14.2	0.01219613
14.4	0.0080154	14.4	0.00681365	14.4	0.01728929	14.4	0.02070973	14.4	0.01228729	14.4	0.00969958	14.4	0.00669376	14.4	0.01764833	14.4	0.01910634	14.4	0.01193971	14.4	0.01894709	14.4	0.01569425	14.4	0.01703478	14.4	0.01441788	14.4	0.01866834	14.4	0.01444435
14.6	0.00972987	14.6	0.01232977	14.6	0.01548072	14.6	0.01431345	14.6	0.00775568	14.6	0.0077916	14.6	0.00516462	14.6	0.01555425	14.6	0.0272999	14.6	0.01357928	14.6	0.02220383	14.6	0.01944668	14.6	0.01196116	14.6	0.02178236	14.6	0.0138805	14.6	0.01275768
14.8	0.01228973	14.8	0.01393494	14.8	0.00999082	14.8	0.0136273	14.8	0.01411164	14.8	0.01099614	14.8	0.00311375	14.8	0.01672187	14.8	0.02096727	14.8	0.01277922	14.8	0.01823243	14.8	0.020311	14.8	0.01863155	14.8	0.02034217	14.8	0.0164646	14.8	0.01312117
15	0.00930239	15	0.00928022	15	0.01185645	15	0.01774762	15	0.01285249	15	0.00750124	15	0.00653487	15	0.01597049	15	0.02168899	15	0.01633953	15	0.01936911	15	0.01623614	15	0.01486404	15	0.01883723	15	0.01533144	15	0.01113952
15.2	0.01256027	15.2	0.00717368	15.2	0.01308491	15.2	0.01521327	15.2	0.00797014	15.2	0.00956377	15.2	0.00862094	15.2	0.01674169	15.2	0.01794585	15.2	0.01483121	15.2	0.01904658	15.2	0.01370722	15.2	0.01993509	15.2	0.01814633	15.2	0.0190447	15.2	0.01112397
15.4	0.00813952	15.4	0.01080593	15.4	0.01360307	15.4	0.01274985	15.4	0.00967657	15.4	0.00895596	15.4	0.00250114	15.4	0.01971218	15.4	0.020823	15.4	0.01247474	15.4	0.02065809	15.4	0.01561586	15.4	0.01895388	15.4	0.01744768	15.4	0.01830544	15.4	0.01266129
15.6	0.01086635	15.6	0.01255757	15.6	0.01787963	15.6	0.01715865	15.6	0.00909521	15.6	0.01096274	15.6	0.00168882	15.6	0.01589546	15.6	0.0224398	15.6	0.01686538	15.6	0.0220405	15.6	0.01699936	15.6	0.01775349	15.6	0.02330628	15.6	0.01295505	15.6	0.01571946
15.8	0.00945482	15.8	0.0129305	15.8	0.0162255	15.8	0.0141338	15.8	0.01104939	15.8	0.007666	15.8	0.00206772	15.8	0.01578716	15.8	0.01812178	15.8	0.01587816	15.8	0.02314603	15.8	0.02101249	15.8	0.01781762	15.8	0.01556525	15.8	0.01434121	15.8	0.0139366
16	0.00961537	16	0.00833415	16	0.01229116	16	0.011081	16	0.01186565	16	0.01157899	16	0.00338132	16	0.00826426	16	0.02091812	16	0.01045512	16	0.01633833	16	0.02014432	16	0.01569733	16	0.02176607	16	0.02012392	16	0.01281867
16.2	0.01054192	16.2	0.01197841	16.2	0.01493701	16.2	0.01480947	16.2	0.00894646	16.2	0.00935179	16.2	0.00393581	16.2	0.01397921	16.2	0.01875669	16.2	0.01265601	16.2	0.022051	16.2	0.01650896	16.2	0.01906923	16.2	0.01953428	16.2	0.01850766	16.2	0.00842463
16.4	0.0062094	16.4	0.00874796	16.4	0.01857517	16.4	0.01690201	16.4	0.01142254	16.4	0.00938705	16.4	0.01149709	16.4	0.01413229	16.4	0.02149569	16.4	0.01772008	16.4	0.02063083	16.4	0.01866215	16.4	0.0175475	16.4	0.01905169	16.4	0.0171051	16.4	0.01289015
16.6	0.00964405	16.6	0.00769355	16.6	0.01352353	16.6	0.01809454	16.6	0.00994397	16.6	0.00833659	16.6	0.00000535	16.6	0.02065771	16.6	0.02082759	16.6	0.01388947	16.6	0.01917377	16.6	0.02537589	16.6	0.00984194	16.6	0.01863681	16.6	0.01643059	16.6	0.01192899
16.8	0.00879078	16.8	0.00876486	16.8	0.01063276	16.8	0.01904139	16.8	0.00802152	16.8	0.00802056	16.8	0.00592605	16.8	0.01673449	16.8	0.02165561	16.8	0.01039232	16.8	0.02264028	16.8	0.01401108	16.8	0.01402833	16.8	0.02007513	16.8	0.01660196	16.8	0.01594494
17	0.01120137	17	0.01288143	17	0.01651112	17	0.01912859	17	0.01188407	17	0.0103473	17	0.0072548	17	0.01816038	17	0.01884736	17	0.01475601	17	0.01796548	17	0.02222173	17	0.01396844	17	0.02037131	17	0.01510251	17	0.01315575
17.2	0.01143723	17.2	0.00482598	17.2	0.01335735	17.2	0.01950706	17.2	0.00698642	17.2	0.01502825	17.2	0.00264213	17.2	0.01161419	17.2	0.02174416	17.2	0.01371004	17.2	0.02132668	17.2	0.02206608	17.2	0.01651707	17.2	0.01835878	17.2	0.01832863	17.2	0.01543944
17.4	0.01178046	17.4	0.01681734	17.4	0.01515605	17.4	0.01412179	17.4	0.01160979	17.4	0.00977733	17.4	0.00438586	17.4	0.02075619	17.4	0.01706767	17.4	0.0147618	17.4	0.01747022	17.4	0.01666401	17.4	0.01689986	17.4	0.01915413	17.4	0.01608599	17.4	0.0136079
17.6	0.01006018	17.6	0.01116739	17.6	0.0116	17.6	0.00945382	17.6	0.01133929	17.6	0.00960861	17.6	0.00721944	17.6	0.01252702	17.6	0.02169297	17.6	0.01258442	17.6	0.01968108	17.6	0.01765755	17.6	0.02036807	17.6	0.01344527	17.6	0.01422062	17.6	0.00941109
17.8	0.0141094	17.8	0.01267048	17.8	0.01420684	17.8	0.0145656	17.8	0.00959475	17.8	0.00508335	17.8	0.0072085	17.8	0.01625864	17.8	0.01975139	17.8	0.01267425	17.8	0.02497164	17.8	0.0189232	17.8	0.01622798	17.8	0.01656183	17.8	0.01765159	17.8	0.01432849
18	0.01178127	18	0.00829279	18	0.01442963	18	0.01672984	18	0.00937364	18	0.00599929	18	0.00670302	18	0.01775955	18	0.01926034	18	0.01505856	18	0.02161702	18	0.02157728	18	0.01947768	18	0.0171685	18	0.01645687	18	0.01310637
18.2	0.00991729	18.2	0.01146599	18.2	0.01104679	18.2	0.0150234	18.2	0.0111	18.2	0.01102362	18.2	0.00461911	18.2	0.01792044	18.2	0.0205823	18.2	0.01026564	18.2	0.01845143	18.2	0.01914985	18.2	0.01834069	18.2	0.02198932	18.2	0.01892233	18.2	0.01514664
18.4	0.01035435	18.4	0.01077061	18.4	0.01446396	18.4	0.01482131	18.4	0.00903255	18.4	0.01060067	18.4	0.00590203	18.4	0.01635186	18.4	0.01764733	18.4	0.01184389	18.4	0.02258441	18.4	0.01799181	18.4	0.01271369	18.4	0.02099422	18.4	0.0150427	18.4	0.00904592
18.6	0.00893449	18.6	0.0098852	18.6	0.01181799	18.6	0.02008243	18.6	0.00331162	18.6	0.00648993	18.6	0.00338412	18.6	0.0216384	18.6	0.02304929	18.6	0.01353016	18.6	0.02313269	18.6	0.01657984	18.6	0.02045836	18.6	0.01673497	18.6	0.0200494	18.6	0.01052059
18.8	0.01482525	18.8	0.00829375	18.8	0.01505545	18.8	0.01613007	18.8	0.00768963	18.8	0.01002056	18.8	0.00795812	18.8	0.02004659	18.8	0.02066757	18.8	0.01532654	18.8	0.02081594	18.8	0.01805605	18.8	0.01468888	18.8	0.0179752	18.8	0.01770188	18.8	0.01219511
19	0.01079034	19	0.01222274	19	0.01639822	19	0.01331209	19	0.00716889	19	0.01345499	19	0.00443145	19	0.01708348	19	0.02295859	19	0.01293548	19	0.01559233	19	0.01552804	19	0.01296505	19	0.0210901	19	0.01811546	19	0.01745993
19.2	0.00653324	19.2	0.010897	19.2	0.01312983	19.2	0.01629222	19.2	0.00771119	19.2	0.00813936	19.2	0.00407679	19.2	0.01663563	19.2	0.01816054	19.2	0.01528765	19.2	0.01588071	19.2	0.02021935	19.2	0.0193634	19.2	0.01325973	19.2	0.02213864	19.2	0.01439591
19.4	0.01099326	19.4	0.00842477	19.4	0.01356182	19.4	0.01422086	19.4	0.00976762	19.4	0.01088216	19.4	0.00678782	19.4	0.01792632	19.4	0.02012526	19.4	0.01373989	19.4	0.01756571	19.4	0.01985738	19.4	0.01837458	19.4	0.01546064	19.4	0.01627949	19.4	0.01446093
19.6	0.00738109	19.6	0.01197511	19.6	0.01195929	19.6	0.01685562	19.6	0.00919338	19.6	0.00755407	19.6	0.00134455	19.6	0.01505295	19.6	0.02160048	19.6	0.01249639	19.6	0.01897666	19.6	0.02198954	19.6	0.01631466	19.6	0.01874427	19.6	0.01909422	19.6	0.0171264
19.8	0.01145068	19.8	0.01319217	19.8	0.01143157	19.8	0.01341574	19.8	0.00760902	19.8	0.0054338	19.8	0.00111316	19.8	0.01589811	19.8	0.01983343	19.8	0.01428764	19.8	0.0175485	19.8	0.01998212	19.8	0.01695955	19.8	0.01572021	19.8	0.01726518	19.8	0.01326628
20	0.00788503	20	0.00623091	20	0.01463957	20	0.0155302	20	0.01296186	20	0.00533616	20	0.00333894	20	0.01033868	20	0.02387117	20	0.01457629	20	0.02037403	20	0.01892368	20	0.01140462	20	0.01633207	20	0.01820268	20	0.01091481
20.2	0.00904076	20.2	0.00853421	20.2	0.01084353	20.2	0.01804437	20.2	0.00833845	20.2	0.01335525	20.2	0.00652135	20.2	0.0194131	20.2	0.02094584	20.2	0.01412619	20.2	0.02029942	20.2	0.01710036	20.2	0.01665722	20.2	0.02401716	20.2	0.01658338	20.2	0.0129056
20.4	0.01781422	20.4	0.01135429	20.4	0.00981587	20.4	0.01541495	20.4	0.00549494	20.4	0.01204873	20.4	0.00267495	20.4	0.01743674	20.4	0.02483232	20.4	0.01270987	20.4	0.02214109	20.4	0.02141261	20.4	0.01857632	20.4	0.0202249	20.4	0.02063332	20.4	0.01427751
20.6	0.00875513	20.6	0.0099689	20.6	0.01024524	20.6	0.01501279	20.6	0.00906217	20.6	0.01458184	20.6	0.00514997	20.6	0.01650848	20.6	0.02111158	20.6	0.0200181	20.6	0.02081184	20.6	0.0119205	20.6	0.01801196	20.6	0.0165956	20.6	0.01712075	20.6	0.01337265
20.8	0.01413627	20.8	0.01305144	20.8	0.01563596	20.8	0.01611576	20.8	0.00503691	20.8	0.00719612	20.8	0.0053799	20.8	0.01366396	20.8	0.02103692	20.8	0.01509515	20.8	0.02213521	20.8	0.01868619	20.8	0.01657208	20.8	0.02210218	20.8	0.01807747	20.8	0.00968515
21	0.00902094	21	0.00655354	21	0.01329352	21	0.01909732	21	0.0077506	21	0.00938922	21	-0.0004184	21	0.01520316	21	0.02458635	21	0.01606164	21	0.01604516	21	0.01630826	21	0.01631014	21	0.01987272	21	0.018512	21	0.01269313
21.2	0.00798122	21.2	0.00904552	21.2	0.01012761	21.2	0.01574182	21.2	0.00486168	21.2	0.00786254	21.2	0.00243842	21.2	0.01532775	21.2	0.02347128	21.2	0.01302405	21.2	0.02073674	21.2	0.01563547	21.2	0.01487411	21.2	0.01885363	21.2	0.0176398	21.2	0.01052161
21.4	0.01286121	21.4	0.00777687	21.4	0.01555763	21.4	0.01485298	21.4	0.00703804	21.4	0.00924902	21.4	0.00058158	21.4	0.01953394	21.4	0.02140551	21.4	0.01479137	21.4	0.01939099	21.4	0.01698662	21.4	0.01678308	21.4	0.02116201	21.4	0.01701546	21.4	0.01130498
21.6	0.00962819	21.6	0.00894691	21.6	0.0096534	21.6	0.01801809	21.6	0.01129151	21.6	0.00925118	21.6	0.0006962	21.6	0.01555945	21.6	0.02094099	21.6	0.00754314	21.6	0.01473314	21.6	0.02163237	21.6	0.02152311	21.6	0.01710391	21.6	0.01890612	21.6	0.02234476
21.8	0.00975866	21.8	0.00959819	21.8	0.01596634	21.8	0.01662377	21.8	0.00998511	21.8	0.01003207	21.8	0.00090918	21.8	0.01718059	21.8	0.02131292	21.8	0.01202691	21.8	0.01925419	21.8	0.02088743	21.8	0.01888795	21.8	0.02273442	21.8	0.01397978	21.8	0.00897988
22	0.01017131	22	0.01128888	22	0.01064716	22	0.0153502	22	0.00716052	22	0.00750007	22	-0.00035723	22	0.01410733	22	0.01799915	22	0.0149634	22	0.01705417	22	0.01831914	22	0.01827954	22	0.02151276	22	0.01673795	22	0.01268521
22.2	0.00625468	22.2	0.01123657	22.2	0.01221811	22.2	0.01538645	22.2	0.0123078	22.2	0.0091275	22.2	0.00560265	22.2	0.02038934	22.2	0.02173195	22.2	0.01608066	22.2	0.01944648	22.2	0.02169931	22.2	0.01625919	22.2	0.02234259	22.2	0.01932208	22.2	0.01091873
22.4	0.0102715	22.4	0.00885841	22.4	0.01595633	22.4	0.01255458	22.4	0.00944993	22.4	0.01007604	22.4	0.00360593	22.4	0.01790017	22.4	0.02111223	22.4	0.01577634	22.4	0.02143236	22.4	0.01910603	22.4	0.01773854	22.4	0.02044464	22.4	0.02143988	22.4	0.01863779
22.6	0.00778395	22.6	0.01392541	22.6	0.01075838	22.6	0.01449305	22.6	0.00592386	22.6	0.00879086	22.6	0.00693617	22.6	0.02009263	22.6	0.0188231	22.6	0.01143655	22.6	0.02038988	22.6	0.01797844	22.6	0.01675755	22.6	0.02197098	22.6	0.01398343	22.6	0.01303535
22.8	0.00319154	22.8	0.00998971	22.8	0.01301296	22.8	0.01647246	22.8	0.00540802	22.8	0.0113901	22.8	-0.00284096	22.8	0.01404112	22.8	0.02436492	22.8	0.01684576	22.8	0.01915925	22.8	0.01654563	22.8	0.01754824	22.8	0.01969772	22.8	0.02070009	22.8	0.01492073
23	0.00945452	23	0.00996949	23	0.01166034	23	0.01952764	23	0.00782658	23	0.00861964	23	-0.00080517	23	0.01800798	23	0.0186154	23	0.01308405	23	0.02478582	23	0.02111518	23	0.01708276	23	0.021691	23	0.01789505	23	0.01516861
23.2	0.0070564	23.2	0.01201878	23.2	0.0124633	23.2	0.01485171	23.2	0.00984195	23.2	0.00793394	23.2	-0.00090929	23.2	0.01875959	23.2	0.02082041	23.2	0.01384391	23.2	0.02259303	23.2	0.0201596	23.2	0.01690331	23.2	0.01656776	23.2	0.01744056	23.2	0.01086063
23.4	0.00852648	23.4	0.01211722	23.4	0.01490876	23.4	0.01349339	23.4	0.00669568	23.4	0.01120895	23.4	0.00736152	23.4	0.01480162	23.4	0.02416831	23.4	0.01458495	23.4	0.0198529	23.4	0.02416189	23.4	0.01433225	23.4	0.01901509	23.4	0.01850167	23.4	0.01480167
23.6	0.00722228	23.6	0.00924489	23.6	0.01188473	23.6	0.01139923	23.6	0.00724133	23.6	0.00820076	23.6	0.00414535	23.6	0.01684749	23.6	0.0195723	23.6	0.01223726	23.6	0.0217675	23.6	0.01508209	23.6	0.01725464	23.6	0.01752958	23.6	0.01749134	23.6	0.01218936
23.8	0.00864382	23.8	0.0103331	23.8	0.01374178	23.8	0.0207633	23.8	0.00635756	23.8	0.01026595	23.8	0.00059722	23.8	0.01372199	23.8	0.0205929	23.8	0.01358016	23.8	0.02094843	23.8	0.01625101	23.8	0.02094004	23.8	0.02079227	23.8	0.01543348	23.8	0.01304527
24	0.00846745	24	0.00945664	24	0.01338234	24	0.01796165	24	0.00792816	24	0.00713994	24	0.00267635	24	0.01343686	24	0.01885663	24	0.01470319	24	0.01791785	24	0.01731942	24	0.0183888	24	0.0224878	24	0.02107671	24	0.01382215
24.2	0.00922834	24.2	0.01271003	24.2	0.01155051	24.2	0.01881716	24.2	0.00391883	24.2	0.00774028	24.2	0.0025244	24.2	0.01729644	24.2	0.02061823	24.2	0.01899834	24.2	0.01989477	24.2	0.02455719	24.2	0.01787291	24.2	0.01916122	24.2	0.02037092	24.2	0.01220414
24.4	0.00748914	24.4	0.01000019	24.4	0.01007093	24.4	0.01720692	24.4	0.0072875	24.4	0.01261164	24.4	0.00763024	24.4	0.01476077	24.4	0.02602435	24.4	0.01506004	24.4	0.01952888	24.4	0.01743591	24.4	0.01850562	24.4	0.01840454	24.4	0.01620761	24.4	0.01106133
24.6	0.00875708	24.6	0.0109596	24.6	0.00956279	24.6	0.01506634	24.6	0.0111441	24.6	0.00227123	24.6	0.00217793	24.6	0.01761713	24.6	0.02160851	24.6	0.01481354	24.6	0.02317027	24.6	0.02037602	24.6	0.02013577	24.6	0.01857417	24.6	0.02078748	24.6	0.00814214
24.8	0.01332662	24.8	0.00842696	24.8	0.01119742	24.8	0.01668052	24.8	0.01210146	24.8	0.00862832	24.8	0.0020552	24.8	0.01511533	24.8	0.02327486	24.8	0.01927272	24.8	0.02138563	24.8	0.02126426	24.8	0.01689812	24.8	0.01852085	24.8	0.01908011	24.8	0.01042909
25	0.0081683	25	0.00591653	25	0.01454376	25	0.0202958	25	0.00973349	25	0.01090207	25	-0.0015829	25	0.01854406	25	0.02133211	25	0.01351939	25	0.01817477	25	0.01721537	25	0.01722054	25	0.01929677	25	0.01816162	25	0.01086806
25.2	0.00960918	25.2	0.00793382	25.2	0.01130239	25.2	0.01940284	25.2	0.00548236	25.2	0.009354	25.2	0.0014764	25.2	0.012578	25.2	0.02307413	25.2	0.0144121	25.2	0.02382377	25.2	0.01895175	25.2	0.02117183	25.2	0.02387947	25.2	0.01880724	25.2	0.00967996
25.4	0.01366264	25.4	0.00734806	25.4	0.01096697	25.4	0.01312826	25.4	0.00893194	25.4	0.00890001	25.4	0.00393124	25.4	0.01491567	25.4	0.0217192	25.4	0.01447824	25.4	0.0175373	25.4	0.01873535	25.4	0.01669257	25.4	0.02357464	25.4	0.01607778	25.4	0.01268863
25.6	0.00942446	25.6	0.00909213	25.6	0.01135399	25.6	0.01695524	25.6	0.01339764	25.6	0.01072435	25.6	0.00157254	25.6	0.01902434	25.6	0.02331799	25.6	0.01598041	25.6	0.02276443	25.6	0.02079969	25.6	0.0167729	25.6	0.02312168	25.6	0.01776853	25.6	0.01244487
25.8	0.00997084	25.8	0.0138691	25.8	0.01201505	25.8	0.0166684	25.8	0.00834372	25.8	0.007172	25.8	0.00430859	25.8	0.0146769	25.8	0.02511307	25.8	0.01833804	25.8	0.01830856	25.8	0.02089961	25.8	0.01706057	25.8	0.02365025	25.8	0.01774489	25.8	0.00834575
26	0.01179708	26	0.00856433	26	0.01031754	26	0.01724818	26	0.00871935	26	0.00612869	26	0.0023891	26	0.01197237	26	0.01970632	26	0.01335499	26	0.02275843	26	0.01974879	26	0.01412973	26	0.02096738	26	0.01851301	26	0.011376
26.2	0.00715482	26.2	0.00698069	26.2	0.01082235	26.2	0.01553297	26.2	0.01042233	26.2	0.00790836	26.2	0.00432714	26.2	0.01652998	26.2	0.02371049	26.2	0.01373114	26.2	0.02192279	26.2	0.01790677	26.2	0.01973689	26.2	0.02133416	26.2	0.01380378	26.2	0.01315427
26.4	0.00787571	26.4	0.00922022	26.4	0.01094733	26.4	0.0153018	26.4	0.01212659	26.4	0.00874789	26.4	0.00284198	26.4	0.02147236	26.4	0.02481239	26.4	0.01795964	26.4	0.01945112	26.4	0.01752843	26.4	0.01725463	26.4	0.02267428	26.4	0.01729921	26.4	0.01548615
26.6	0.01192593	26.6	0.008224	26.6	0.01027039	26.6	0.01171851	26.6	0.00871184	26.6	0.00648711	26.6	-0.00019852	26.6	0.01313267	26.6	0.02498384	26.6	0.01977166	26.6	0.02078744	26.6	0.02246962	26.6	0.01320588	26.6	0.01972455	26.6	0.01590801	26.6	0.0129125
26.8	0.01104443	26.8	0.00721845	26.8	0.01298696	26.8	0.01767287	26.8	0.00869339	26.8	0.01009941	26.8	0.00262665	26.8	0.01582891	26.8	0.0201071	26.8	0.01745909	26.8	0.01928136	26.8	0.01861084	26.8	0.01823127	26.8	0.02406583	26.8	0.01490698	26.8	0.01122238
27	0.01206697	27	0.00841431	27	0.01589442	27	0.01469677	27	0.00913311	27	0.00769356	27	0.00311625	27	0.01601305	27.01	0.02194129	27.01	0.01434837	27.01	0.02274981	27.01	0.01786694	27.01	0.01398648	27.01	0.02438242	27.01	0.01837622	27.01	0.01541383
27.2	0.01021491	27.2	0.00907126	27.2	0.01089552	27.2	0.01905221	27.2	0.01009107	27.2	0.01239665	27.2	-0.00078463	27.2	0.0172538	27.2	0.02132166	27.2	0.00820752	27.2	0.02394123	27.2	0.02295705	27.2	0.01621499	27.2	0.01946499	27.2	0.01769269	27.2	0.01063966
27.4	0.00312422	27.4	0.00744565	27.4	0.01099394	27.4	0.01736707	27.4	0.0068916	27.4	0.00985947	27.4	0.00168142	27.4	0.01282252	27.4	0.0204376	27.4	0.01566982	27.4	0.01974569	27.4	0.02060697	27.4	0.01672278	27.4	0.02485259	27.4	0.01644681	27.4	0.0157516
27.6	0.01081043	27.6	0.01116589	27.6	0.01076584	27.6	0.01738346	27.6	0.01085936	27.6	0.00840643	27.6	-0.00297291	27.6	0.01815124	27.6	0.02006032	27.6	0.01481654	27.6	0.02185755	27.6	0.02712948	27.6	0.0145076	27.6	0.02163474	27.6	0.01967385	27.6	0.01265946
27.8	0.0115681	27.8	0.00857516	27.8	0.01377024	27.8	0.0162088	27.8	0.00749305	27.8	0.0064713	27.8	0.00592967	27.8	0.01649112	27.8	0.02585248	27.8	0.01284565	27.8	0.0208235	27.8	0.02339387	27.8	0.0191883	27.8	0.02294247	27.8	0.01587073	27.8	0.01541147
28	0.00589153	28	0.00929523	28	0.01074584	28	0.01702921	28	0.00950304	28	0.00537786	28	0.00317321	28	0.01404718	28	0.02873445	28	0.01265784	28	0.01435557	28	0.01599586	28	0.01916942	28	0.01986032	28	0.0159164	28	0.00881901
28.2	0.01111677	28.2	0.01272007	28.2	0.01589276	28.2	0.01475135	28.2	0.00939026	28.2	0.0090059	28.2	-0.00165263	28.2	0.01248153	28.2	0.01999958	28.2	0.01524754	28.2	0.01905036	28.2	0.01898342	28.2	0.0176133	28.2	0.02082372	28.2	0.02028811	28.2	0.01140672
28.4	0.00787568	28.4	0.0082852	28.4	0.01207005	28.4	0.01145464	28.4	0.01050252	28.4	0.01046513	28.4	0.00343983	28.4	0.01514574	28.4	0.01960758	28.4	0.01314008	28.4	0.02098843	28.4	0.02136308	28.4	0.01967599	28.4	0.01969437	28.4	0.01666891	28.4	0.01524309
28.6	0.01153593	28.6	0.00690633	28.6	0.01046854	28.6	0.0121448	28.6	0.00674422	28.6	0.01006695	28.6	-0.00065321	28.6	0.01382846	28.6	0.02515408	28.6	0.01464268	28.6	0.0235389	28.6	0.0204207	28.6	0.02034637	28.6	0.0209338	28.6	0.01590611	28.6	0.01287093
28.8	0.00552031	28.8	0.00970323	28.8	0.0144267	28.8	0.02062689	28.8	0.00832709	28.8	0.00969905	28.8	0.00359377	28.8	0.02386139	28.8	0.02124975	28.8	0.01996306	28.8	0.02126198	28.8	0.02030715	28.8	0.01535791	28.8	0.02119472	28.8	0.02131603	28.8	0.01131725
29	0.00555826	29	0.00901668	29	0.01341652	29	0.01889239	29	0.00412841	29	0.00678475	29	0.00626038	29	0.01689502	29	0.02381224	29	0.01540588	29	0.01759783	29	0.02121286	29	0.01997675	29	0.02226645	29	0.01924642	29	0.0140727
29.2	0.00994533	29.2	0.00882053	29.2	0.01217818	29.2	0.01439082	29.2	0.00663483	29.2	0.00582968	29.2	-0.00272188	29.2	0.01660819	29.2	0.02148318	29.2	0.01142274	29.2	0.02203623	29.2	0.01867609	29.2	0.01571238	29.2	0.01766293	29.2	0.01629776	29.2	0.01356176
29.4	0.01201801	29.4	0.00762301	29.4	0.01325448	29.4	0.01405589	29.4	0.0082742	29.4	0.00809161	29.4	0.00285265	29.4	0.01764586	29.4	0.02446978	29.4	0.01427472	29.4	0.0277773	29.4	0.02496266	29.4	0.01573266	29.4	0.02102734	29.4	0.02157582	29.4	0.01258346
29.6	0.00575827	29.6	0.00889203	29.6	0.01263354	29.6	0.01560184	29.6	0.00713631	29.6	0.00738767	29.6	-0.000614	29.6	0.01606461	29.6	0.02537687	29.6	0.01212171	29.6	0.01929393	29.6	0.0238108	29.6	0.0205329	29.6	0.02001776	29.6	0.01919343	29.6	0.00985225
29.8	0.00975738	29.8	0.00559521	29.8	0.01235898	29.8	0.01730085	29.8	0.00864108	29.8	0.00487852	29.8	0.000012	29.8	0.01429218	29.8	0.02362894	29.8	0.0184456	29.8	0.02125505	29.8	0.02005843	29.8	0.01533431	29.8	0.01787074	29.8	0.0198491	29.8	0.01302128
30	-4.26047	30	-4.440896	30	-4.43326	30	-4.520597	30	-4.510353	30	-4.566222	30	-4.461312	30	-4.216309	30	-3.966812	30	-4.098574	30	-4.133289	30	-4.107865	30	-4.117547	30	-4.195269	30	-4.077712	30	-4.060836
30.2	-4.574555	30.2	-4.756887	30.2	-4.712996	30.2	-4.815546	30.2	-4.783371	30.2	-4.867119	30.2	-4.791139	30.2	-4.541217	30.2	-4.389056	30.2	-4.542204	30.2	-4.536452	30.2	-4.535416	30.2	-4.505821	30.2	-4.6134	30.2	-4.468072	30.2	-4.445491
30.4	-4.763954	30.4	-4.955814	30.4	-4.891052	30.4	-5.004879	30.4	-4.96317	30.4	-5.052691	30.4	-4.986616	30.4	-4.733768	30.4	-4.617139	30.4	-4.755266	30.4	-4.751031	30.4	-4.763615	30.4	-4.716719	30.4	-4.836843	30.4	-4.683014	30.4	-4.639948
30.6	-4.902778	30.6	-5.100154	30.6	-5.02127	30.6	-5.138074	30.6	-5.083606	30.6	-5.185461	30.6	-5.13506	30.6	-4.871659	30.6	-4.752886	30.6	-4.900878	30.6	-4.883729	30.6	-4.906426	30.6	-4.858569	30.6	-4.986734	30.6	-4.823271	30.6	-4.773002
30.8	-5.013226	30.8	-5.206686	30.8	-5.124396	30.8	-5.237293	30.8	-5.186265	30.8	-5.28417	30.8	-5.238433	30.8	-4.979408	30.8	-4.857937	30.8	-5.013354	30.8	-4.99578	30.8	-5.013506	30.8	-4.963078	30.8	-5.0844	30.8	-4.930018	30.8	-4.884654
31	-5.092501	31	-5.288035	31	-5.200087	31	-5.320542	31	-5.265615	31	-5.370832	31	-5.323405	31	-5.068849	31	-4.9411	31	-5.09607	31	-5.077774	31	-5.103742	31	-5.049818	31	-5.172606	31	-5.01016	31	-4.965433
31.2	-5.159621	31.2	-5.359379	31.2	-5.272274	31.2	-5.388582	31.2	-5.331948	31.2	-5.438242	31.2	-5.397521	31.2	-5.135455	31.2	-5.009168	31.2	-5.169105	31.2	-5.146327	31.2	-5.176414	31.2	-5.119611	31.2	-5.243435	31.2	-5.082091	31.2	-5.033276
31.4	-5.214824	31.4	-5.41798	31.4	-5.328983	31.4	-5.446456	31.4	-5.39488	31.4	-5.495931	31.4	-5.456444	31.4	-5.199919	31.4	-5.070544	31.4	-5.229472	31.4	-5.206242	31.4	-5.231895	31.4	-5.173741	31.4	-5.301774	31.4	-5.137929	31.4	-5.08994
31.6	-5.267518	31.6	-5.474263	31.6	-5.384642	31.6	-5.502085	31.6	-5.443824	31.6	-5.54852	31.6	-5.512565	31.6	-5.252801	31.6	-5.119068	31.6	-5.281018	31.6	-5.258737	31.6	-5.285341	31.6	-5.225673	31.6	-5.357235	31.6	-5.191247	31.6	-5.136085
31.8	-5.321009	31.8	-5.523058	31.8	-5.426637	31.8	-5.549137	31.8	-5.488041	31.8	-5.594085	31.8	-5.556952	31.8	-5.296697	31.8	-5.165825	31.8	-5.330215	31.8	-5.301161	31.8	-5.328576	31.8	-5.275945	31.8	-5.401187	31.8	-5.230991	31.8	-5.189727
32	-5.356703	32	-5.566935	32	-5.469721	32	-5.589304	32	-5.525097	32	-5.636665	32	-5.602372	32	-5.340706	32	-5.202685	32	-5.364102	32	-5.34296	32	-5.370131	32	-5.310063	32	-5.438312	32	-5.270042	32	-5.225519
32.2	-5.394924	32.2	-5.599075	32.2	-5.501843	32.2	-5.621761	32.2	-5.567691	32.2	-5.676483	32.2	-5.63987	32.2	-5.37769	32.2	-5.239611	32.2	-5.403149	32.2	-5.380973	32.2	-5.40295	32.2	-5.344623	32.2	-5.476422	32.2	-5.303977	32.2	-5.259508
32.4	-5.428595	32.4	-5.639798	32.4	-5.540538	32.4	-5.65932	32.4	-5.599975	32.4	-5.710693	32.4	-5.677874	32.4	-5.41326	32.4	-5.275664	32.4	-5.440161	32.4	-5.414253	32.4	-5.440939	32.4	-5.379562	32.4	-5.508165	32.4	-5.340501	32.4	-5.287411
32.6	-5.460754	32.6	-5.665897	32.6	-5.571301	32.6	-5.690284	32.6	-5.63233	32.6	-5.742841	32.6	-5.709568	32.6	-5.448741	32.6	-5.296171	32.6	-5.460953	32.6	-5.437659	32.6	-5.471717	32.6	-5.405352	32.6	-5.538408	32.6	-5.367751	32.6	-5.317969
32.8	-5.489193	32.8	-5.70141	32.8	-5.599182	32.8	-5.717968	32.8	-5.656811	32.8	-5.770215	32.8	-5.735815	32.8	-5.476256	32.8	-5.326293	32.8	-5.490975	32.8	-5.470016	32.8	-5.497786	32.8	-5.432994	32.8	-5.562694	32.8	-5.390849	32.8	-5.347785
33	-5.514497	33	-5.724956	33	-5.62326	33	-5.742468	33	-5.686189	33	-5.797068	33	-5.767064	33	-5.501577	33	-5.350014	33	-5.518793	33	-5.491402	33	-5.519436	33	-5.452913	33	-5.592659	33	-5.419419	33	-5.367867
33.2	-5.539558	33.2	-5.753871	33.2	-5.64595	33.2	-5.761766	33.2	-5.711022	33.2	-5.819541	33.2	-5.792687	33.2	-5.530975	33.2	-5.374341	33.2	-5.538451	33.2	-5.513289	33.2	-5.547294	33.2	-5.477126	33.2	-5.612462	33.2	-5.439958	33.2	-5.388576
33.4	-5.56452	33.4	-5.774063	33.4	-5.672852	33.4	-5.797065	33.4	-5.732381	33.4	-5.846236	33.4	-5.819519	33.4	-5.549828	33.4	-5.393112	33.4	-5.556178	33.4	-5.529491	33.4	-5.565104	33.4	-5.500714	33.4	-5.632986	33.4	-5.465879	33.4	-5.419949
33.6	-5.584497	33.6	-5.798042	33.6	-5.695622	33.6	-5.811624	33.6	-5.753479	33.6	-5.870883	33.6	-5.835303	33.6	-5.574858	33.6	-5.413725	33.6	-5.576193	33.6	-5.553684	33.6	-5.587308	33.6	-5.516078	33.6	-5.654382	33.6	-5.487225	33.6	-5.431579
33.8	-5.603835	33.8	-5.82471	33.8	-5.713665	33.8	-5.832195	33.8	-5.768743	33.8	-5.887653	33.8	-5.864618	33.8	-5.598114	33.8	-5.432832	33.8	-5.596548	33.8	-5.571208	33.8	-5.604402	33.8	-5.539184	33.8	-5.67126	33.8	-5.499694	33.8	-5.447041
34	-5.625525	34	-5.836205	34	-5.736599	34	-5.84686	34	-5.799152	34	-5.907493	34	-5.884511	34	-5.614961	34	-5.447245	34	-5.615587	34	-5.585616	34	-5.622027	34	-5.556533	34	-5.691509	34	-5.517818	34	-5.463644
34.2	-5.641703	34.2	-5.858497	34.2	-5.750687	34.2	-5.872337	34.2	-5.81269	34.2	-5.922646	34.2	-5.902357	34.2	-5.634914	34.2	-5.465974	34.2	-5.630373	34.2	-5.610401	34.2	-5.640491	34.2	-5.572028	34.2	-5.708278	34.2	-5.534257	34.2	-5.484192
34.4	-5.658296	34.4	-5.872431	34.4	-5.769334	34.4	-5.888643	34.4	-5.829878	34.4	-5.93951	34.4	-5.919115	34.4	-5.647947	34.4	-5.479238	34.4	-5.647829	34.4	-5.619227	34.4	-5.651566	34.4	-5.585315	34.4	-5.718542	34.4	-5.548753	34.4	-5.494313
34.6	-5.669954	34.6	-5.886661	34.6	-5.779512	34.6	-5.89771	34.6	-5.841344	34.6	-5.956958	34.6	-5.932516	34.6	-5.664771	34.6	-5.491393	34.6	-5.659838	34.6	-5.634626	34.6	-5.663381	34.6	-5.600438	34.6	-5.735261	34.6	-5.560299	34.6	-5.508333
34.8	-5.679939	34.8	-5.901132	34.8	-5.792251	34.8	-5.909803	34.8	-5.852499	34.8	-5.963571	34.8	-5.942618	34.8	-5.670823	34.8	-5.501485	34.8	-5.669183	34.8	-5.644381	34.8	-5.671935	34.8	-5.605786	34.8	-5.743942	34.8	-5.569078	34.8	-5.5169
35	-1.106656	35	-1.180062	35	-1.130252	35	-1.147698	35	-1.14636	35	-1.15792	35	-1.14832	35	-1.093865	35	-0.994377	35	-1.04107	35	-1.024327	35	-1.032005	35	-1.030808	35	-1.036331	35	-1.005752	35	-0.9902727
35.2	-1.06241	35.2	-1.131453	35.2	-1.085631	35.2	-1.095778	35.2	-1.095143	35.2	-1.11313	35.2	-1.09306	35.2	-1.050243	35.2	-0.9641488	35.2	-0.9999388	35.2	-0.9843924	35.2	-0.9900735	35.2	-0.9828653	35.2	-0.9981471	35.2	-0.9672216	35.2	-0.9544278
35.4	-1.017818	35.4	-1.084227	35.4	-1.038999	35.4	-1.055898	35.4	-1.05445	35.4	-1.066584	35.4	-1.052949	35.4	-0.996475	35.4	-0.9105381	35.4	-0.9608082	35.4	-0.9371307	35.4	-0.9483413	35.4	-0.9370046	35.4	-0.9475877	35.4	-0.9210774	35.4	-0.9108717
35.6	-0.9797896	35.6	-1.046052	35.6	-1.003871	35.6	-1.01158	35.6	-1.0165	35.6	-1.027492	35.6	-1.014287	35.6	-0.9629897	35.6	-0.8740776	35.6	-0.9146801	35.6	-0.895708	35.6	-0.9085533	35.6	-0.901644	35.6	-0.9108423	35.6	-0.882908	35.6	-0.8744633
35.8	-0.9440867	35.8	-1.018948	35.8	-0.9773512	35.8	-0.9836622	35.8	-0.9870162	35.8	-0.9996691	35.8	-0.9874727	35.8	-0.932071	35.8	-0.8413745	35.8	-0.8843247	35.8	-0.8602663	35.8	-0.8740198	35.8	-0.861744	35.8	-0.8812807	35.8	-0.847739	35.8	-0.840452
36	-0.9262264	36	-0.9906446	36	-0.9530087	36	-0.9567122	36	-0.9597676	36	-0.9670877	36	-0.9641208	36	-0.9078118	36	-0.8123888	36	-0.8628022	36	-0.8355985	36	-0.8469366	36	-0.8340349	36	-0.8481608	36	-0.8174738	36	-0.81489
36.2	-0.9076366	36.2	-0.962806	36.2	-0.9311832	36.2	-0.9320592	36.2	-0.9370273	36.2	-0.950136	36.2	-0.9385757	36.2	-0.8880411	36.2	-0.7954145	36.2	-0.8386486	36.2	-0.8127027	36.2	-0.8247836	36.2	-0.8179902	36.2	-0.8254732	36.2	-0.8040016	36.2	-0.7964435
36.4	-0.8841028	36.4	-0.9492018	36.4	-0.9102229	36.4	-0.9127523	36.4	-0.9174278	36.4	-0.9280428	36.4	-0.9247671	36.4	-0.8677031	36.4	-0.7709513	36.4	-0.8162151	36.4	-0.7980952	36.4	-0.8088028	36.4	-0.7960895	36.4	-0.8037722	36.4	-0.7805404	36.4	-0.7683365
36.6	-0.871108	36.6	-0.9324531	36.6	-0.8898141	36.6	-0.8983943	36.6	-0.9080787	36.6	-0.9107795	36.6	-0.9039357	36.6	-0.8484897	36.6	-0.7538346	36.6	-0.8029717	36.6	-0.7795696	36.6	-0.7922087	36.6	-0.7762265	36.6	-0.7852536	36.6	-0.7658696	36.6	-0.7545693
36.8	-0.8546939	36.8	-0.9130836	36.8	-0.8788781	36.8	-0.8822733	36.8	-0.8956798	36.8	-0.89589	36.8	-0.8880271	36.8	-0.8407824	36.8	-0.7360285	36.8	-0.7905876	36.8	-0.7622408	36.8	-0.7748538	36.8	-0.7615249	36.8	-0.7716583	36.8	-0.7450206	36.8	-0.7377582
37	-0.8468855	37	-0.9018218	37	-0.8688468	37	-0.8764012	37	-0.8754804	37	-0.8855869	37	-0.8744562	37	-0.8188656	37	-0.7293708	37	-0.7753465	37	-0.7509704	37	-0.7586116	37	-0.7524597	37	-0.7571383	37	-0.7303364	37	-0.7277002
37.2	-0.8259873	37.2	-0.8889428	37.2	-0.8571982	37.2	-0.8563976	37.2	-0.8621497	37.2	-0.8739167	37.2	-0.8612681	37.2	-0.8118712	37.2	-0.7143537	37.2	-0.759836	37.2	-0.7402118	37.2	-0.7466296	37.2	-0.7375532	37.2	-0.746025	37.2	-0.7274615	37.2	-0.7171922
37.4	-0.8172972	37.4	-0.8820072	37.4	-0.8464595	37.4	-0.8491114	37.4	-0.8558441	37.4	-0.8572663	37.4	-0.8515681	37.4	-0.7985129	37.4	-0.7034181	37.4	-0.7478129	37.4	-0.7227798	37.4	-0.7359192	37.4	-0.7267054	37.4	-0.7309582	37.4	-0.7064649	37.4	-0.7031695
37.6	-0.8041123	37.6	-0.86594	37.6	-0.8376892	37.6	-0.8373071	37.6	-0.8410654	37.6	-0.8536759	37.6	-0.839452	37.6	-0.7843701	37.6	-0.6944488	37.6	-0.7383777	37.6	-0.7129953	37.6	-0.7242525	37.6	-0.7134389	37.6	-0.7208148	37.6	-0.7004018	37.6	-0.6962362
37.8	-0.8015333	37.8	-0.8605562	37.8	-0.8278771	37.8	-0.8254458	37.8	-0.8347715	37.8	-0.8420528	37.8	-0.8323619	37.8	-0.7843848	37.8	-0.6810641	37.8	-0.7333899	37.8	-0.7054791	37.8	-0.7161417	37.8	-0.7019048	37.8	-0.7120962	37.8	-0.6866465	37.8	-0.6829685
38	-0.7918101	38	-0.8507335	38	-0.8150041	38	-0.8149663	38	-0.8256878	38	-0.8285682	38	-0.8201948	38	-0.7683381	38	-0.6704838	38	-0.7143639	38	-0.6978065	38	-0.7057181	38	-0.699491	38	-0.7039544	38	-0.6814031	38	-0.6717774
38.2	-0.7834295	38.2	-0.8376274	38.2	-0.8035204	38.2	-0.8057212	38.2	-0.813861	38.2	-0.8190826	38.2	-0.8089005	38.2	-0.7626343	38.2	-0.6686887	38.2	-0.7103868	38.2	-0.6891729	38.2	-0.7003914	38.2	-0.6938095	38.2	-0.6949782	38.2	-0.6698431	38.2	-0.6684366
38.4	-0.7718713	38.4	-0.8344789	38.4	-0.7993194	38.4	-0.799682	38.4	-0.8053359	38.4	-0.8074438	38.4	-0.8025299	38.4	-0.7537719	38.4	-0.6540514	38.4	-0.7054687	38.4	-0.6817477	38.4	-0.6907697	38.4	-0.681341	38.4	-0.6852607	38.4	-0.6618229	38.4	-0.6616259
38.6	-0.7695757	38.6	-0.8248796	38.6	-0.7915078	38.6	-0.7896014	38.6	-0.7963398	38.6	-0.8048032	38.6	-0.7977247	38.6	-0.7484251	38.6	-0.651387	38.6	-0.6963741	38.6	-0.6691298	38.6	-0.6821101	38.6	-0.6730899	38.6	-0.675393	38.6	-0.6539921	38.6	-0.6535183
38.8	-0.7587613	38.8	-0.8180473	38.8	-0.7824892	38.8	-0.7835478	38.8	-0.7920039	38.8	-0.7934729	38.8	-0.7906785	38.8	-0.7413181	38.8	-0.6454818	38.8	-0.6904746	38.8	-0.660699	38.8	-0.6725839	38.8	-0.6680146	38.8	-0.6704664	38.8	-0.6478949	38.8	-0.6452251
39	-0.7525599	39	-0.811698	39	-0.7837827	39	-0.7753158	39	-0.7840666	39	-0.7897324	39	-0.7811643	39	-0.7329081	39	-0.6368043	39	-0.6799251	39	-0.6589923	39	-0.6683573	39	-0.6584339	39	-0.6641101	39	-0.6422237	39	-0.6403049
39.2	-0.7446119	39.2	-0.8039959	39.2	-0.7736945	39.2	-0.7730981	39.2	-0.778069	39.2	-0.7840379	39.2	-0.7731903	39.2	-0.7249166	39.2	-0.6324198	39.2	-0.6756739	39.2	-0.6540364	39.2	-0.6575564	39.2	-0.6529982	39.2	-0.6588365	39.2	-0.6382557	39.2	-0.6309057
39.4	-0.7422784	39.4	-0.7994309	39.4	-0.7661855	39.4	-0.7641912	39.4	-0.7754583	39.4	-0.7726151	39.4	-0.7698085	39.4	-0.7247578	39.4	-0.6237019	39.4	-0.6733268	39.4	-0.6486909	39.4	-0.6566775	39.4	-0.6459041	39.4	-0.6515244	39.4	-0.6269561	39.4	-0.6243415
39.6	-0.734098	39.6	-0.7917753	39.6	-0.7648308	39.6	-0.7584433	39.6	-0.762419	39.6	-0.7736216	39.6	-0.7602132	39.6	-0.7124702	39.6	-0.6232517	39.6	-0.6692324	39.6	-0.6433021	39.6	-0.6492168	39.6	-0.6403404	39.6	-0.6461446	39.6	-0.6255416	39.6	-0.6225452
39.8	-0.73515	39.8	-0.7880554	39.8	-0.7576768	39.8	-0.7590161	39.8	-0.7628341	39.8	-0.7688227	39.8	-0.7623085	39.8	-0.7135611	39.8	-0.6172587	39.8	-0.6630609	39.8	-0.6367471	39.8	-0.6458099	39.8	-0.6381485	39.8	-0.6462211	39.8	-0.6206213	39.8	-0.6202438
40	-4.857827	40	-5.059173	40	-4.977962	40	-5.066109	40	-5.02367	40	-5.097003	40	-5.049242	40	-4.828483	40	-4.649793	40	-4.818793	40	-4.804363	40	-4.797624	40	-4.772834	40	-4.864598	40	-4.751414	40	-4.694166
40.2	-5.145173	40.2	-5.3594	40.2	-5.253344	40.2	-5.356473	40.2	-5.301858	40.2	-5.394369	40.2	-5.356712	40.2	-5.124109	40.2	-4.934512	40.2	-5.104616	40.2	-5.076256	40.2	-5.096077	40.2	-5.044799	40.2	-5.153756	40.2	-5.006662	40.2	-4.961312
40.4	-5.279186	40.4	-5.494703	40.4	-5.385509	40.4	-5.485951	40.4	-5.433849	40.4	-5.536614	40.4	-5.494213	40.4	-5.257557	40.4	-5.064877	40.4	-5.223125	40.4	-5.197192	40.4	-5.226429	40.4	-5.166412	40.4	-5.280796	40.4	-5.128159	40.4	-5.07972
40.6	-5.359583	40.6	-5.578454	40.6	-5.465276	40.6	-5.562348	40.6	-5.519733	40.6	-5.615014	40.6	-5.578884	40.6	-5.333616	40.6	-5.137723	40.6	-5.30842	40.6	-5.275329	40.6	-5.302738	40.6	-5.250416	40.6	-5.362991	40.6	-5.19965	40.6	-5.153597
40.8	-5.407658	40.8	-5.636873	40.8	-5.520441	40.8	-5.621115	40.8	-5.579553	40.8	-5.672523	40.8	-5.634964	40.8	-5.393912	40.8	-5.187388	40.8	-5.355947	40.8	-5.323313	40.8	-5.356094	40.8	-5.298007	40.8	-5.414886	40.8	-5.250872	40.8	-5.210187
41	-5.455384	41	-5.680622	41	-5.55964	41	-5.664295	41	-5.618276	41	-5.71497	41	-5.677231	41	-5.436783	41	-5.225438	41	-5.396384	41	-5.364899	41	-5.396346	41	-5.334306	41	-5.454488	41	-5.291452	41	-5.248055
41.2	-5.491132	41.2	-5.714994	41.2	-5.597216	41.2	-5.702906	41.2	-5.651783	41.2	-5.749927	41.2	-5.714573	41.2	-5.470644	41.2	-5.264035	41.2	-5.440862	41.2	-5.400463	41.2	-5.434474	41.2	-5.374504	41.2	-5.488613	41.2	-5.326447	41.2	-5.278063
41.4	-5.517053	41.4	-5.746866	41.4	-5.629591	41.4	-5.733603	41.4	-5.689047	41.4	-5.78386	41.4	-5.749324	41.4	-5.502899	41.4	-5.288122	41.4	-5.464949	41.4	-5.434261	41.4	-5.458383	41.4	-5.405771	41.4	-5.514706	41.4	-5.358039	41.4	-5.310312
41.6	-5.543447	41.6	-5.776026	41.6	-5.655021	41.6	-5.755627	41.6	-5.708434	41.6	-5.808908	41.6	-5.776378	41.6	-5.527488	41.6	-5.315912	41.6	-5.490141	41.6	-5.455532	41.6	-5.484402	41.6	-5.426167	41.6	-5.546663	41.6	-5.377794	41.6	-5.337456
41.8	-5.569154	41.8	-5.799257	41.8	-5.67416	41.8	-5.782167	41.8	-5.729685	41.8	-5.83656	41.8	-5.797428	41.8	-5.550852	41.8	-5.336456	41.8	-5.512421	41.8	-5.477581	41.8	-5.505788	41.8	-5.452447	41.8	-5.569319	41.8	-5.405088	41.8	-5.361625
42	-5.586988	42	-5.820334	42	-5.699058	42	-5.801207	42	-5.759125	42	-5.855014	42	-5.821386	42	-5.576339	42	-5.353884	42	-5.531096	42	-5.493218	42	-5.525372	42	-5.466189	42	-5.58539	42	-5.424872	42	-5.374891
42.2	-5.610082	42.2	-5.837234	42.2	-5.715226	42.2	-5.81911	42.2	-5.777896	42.2	-5.876255	42.2	-5.841729	42.2	-5.590803	42.2	-5.371037	42.2	-5.552842	42.2	-5.51717	42.2	-5.54283	42.2	-5.487817	42.2	-5.604035	42.2	-5.444549	42.2	-5.393589
42.4	-5.630081	42.4	-5.856423	42.4	-5.73041	42.4	-5.837426	42.4	-5.794067	42.4	-5.893843	42.4	-5.856427	42.4	-5.604712	42.4	-5.389485	42.4	-5.569159	42.4	-5.534671	42.4	-5.563124	42.4	-5.504557	42.4	-5.623243	42.4	-5.457214	42.4	-5.410111
42.6	-5.637418	42.6	-5.873192	42.6	-5.751441	42.6	-5.854302	42.6	-5.808894	42.6	-5.906939	42.6	-5.875041	42.6	-5.62041	42.6	-5.405958	42.6	-5.584651	42.6	-5.543324	42.6	-5.578451	42.6	-5.516064	42.6	-5.63551	42.6	-5.471555	42.6	-5.423838
42.8	-5.65823	42.8	-5.890456	42.8	-5.767809	42.8	-5.865458	42.8	-5.818127	42.8	-5.918577	42.8	-5.891341	42.8	-5.643092	42.8	-5.419628	42.8	-5.59586	42.8	-5.558664	42.8	-5.591651	42.8	-5.531355	42.8	-5.646841	42.8	-5.487332	42.8	-5.437141
43	-5.667977	43	-5.897971	43	-5.778248	43	-5.880942	43	-5.83405	43	-5.936222	43	-5.902897	43	-5.651024	43	-5.43257	43	-5.610336	43	-5.575231	43	-5.600588	43	-5.550372	43	-5.663021	43	-5.500581	43	-5.448701
43.2	-5.679982	43.2	-5.922746	43.2	-5.791086	43.2	-5.899326	43.2	-5.850284	43.2	-5.951174	43.2	-5.919564	43.2	-5.661617	43.2	-5.442779	43.2	-5.621923	43.2	-5.585711	43.2	-5.611297	43.2	-5.549646	43.2	-5.674785	43.2	-5.510916	43.2	-5.460915
43.4	-5.698144	43.4	-5.929784	43.4	-5.80372	43.4	-5.905807	43.4	-5.862957	43.4	-5.957027	43.4	-5.926764	43.4	-5.679108	43.4	-5.454834	43.4	-5.633351	43.4	-5.59468	43.4	-5.623621	43.4	-5.568786	43.4	-5.685431	43.4	-5.519901	43.4	-5.473042
43.6	-5.706411	43.6	-5.940207	43.6	-5.814497	43.6	-5.915311	43.6	-5.876194	43.6	-5.97109	43.6	-5.943146	43.6	-5.687903	43.6	-5.462653	43.6	-5.643631	43.6	-5.603339	43.6	-5.636661	43.6	-5.577245	43.6	-5.70012	43.6	-5.533932	43.6	-5.486741
43.8	-5.717989	43.8	-5.949573	43.8	-5.827705	43.8	-5.926342	43.8	-5.881088	43.8	-5.980237	43.8	-5.953094	43.8	-5.695875	43.8	-5.473777	43.8	-5.652402	43.8	-5.613433	43.8	-5.652717	43.8	-5.590016	43.8	-5.708764	43.8	-5.539336	43.8	-5.493954
44	-5.72532	44	-5.95875	44	-5.835599	44	-5.940395	44	-5.896066	44	-5.995197	44	-5.959254	44	-5.708301	44	-5.485214	44	-5.662533	44	-5.63004	44	-5.656176	44	-5.598067	44	-5.713843	44	-5.549563	44	-5.505169
44.2	-5.733726	44.2	-5.969284	44.2	-5.849427	44.2	-5.955062	44.2	-5.903711	44.2	-6.001726	44.2	-5.97295	44.2	-5.721303	44.2	-5.493912	44.2	-5.672219	44.2	-5.634074	44.2	-5.666458	44.2	-5.60135	44.2	-5.725152	44.2	-5.558793	44.2	-5.509934
44.4	-5.743056	44.4	-5.98352	44.4	-5.85228	44.4	-5.957104	44.4	-5.912959	44.4	-6.011275	44.4	-5.981362	44.4	-5.731575	44.4	-5.498241	44.4	-5.682045	44.4	-5.642269	44.4	-5.671964	44.4	-5.610357	44.4	-5.733878	44.4	-5.5666	44.4	-5.51997
44.6	-5.755562	44.6	-5.985185	44.6	-5.864868	44.6	-5.965586	44.6	-5.923659	44.6	-6.014754	44.6	-5.99018	44.6	-5.735233	44.6	-5.509138	44.6	-5.690269	44.6	-5.651914	44.6	-5.685197	44.6	-5.619609	44.6	-5.738654	44.6	-5.573626	44.6	-5.524482
44.8	-5.757883	44.8	-5.992414	44.8	-5.865973	44.8	-5.971173	44.8	-5.929568	44.8	-6.021947	44.8	-5.995138	44.8	-5.740509	44.8	-5.512138	44.8	-5.69226	44.8	-5.655675	44.8	-5.688931	44.8	-5.620519	44.8	-5.745726	44.8	-5.580803	44.8	-5.528881
45	-1.073702	45	-1.152518	45	-1.102023	45	-1.098303	45	-1.10898	45	-1.112626	45	-1.081135	45	-1.037462	45	-0.9429761	45	-1.000914	45	-0.9766014	45	-0.9779543	45	-0.983465	45	-0.9849585	45	-0.9498843	45	-0.9310296
45.2	-1.034998	45.2	-1.102881	45.2	-1.055427	45.2	-1.048426	45.2	-1.065584	45.2	-1.062897	45.2	-1.035147	45.2	-0.9969806	45.2	-0.9132908	45.2	-0.9763266	45.2	-0.9328419	45.2	-0.9400547	45.2	-0.9454665	45.2	-0.9388446	45.2	-0.9033834	45.2	-0.9088904
45.4	-0.9878662	45.4	-1.064538	45.4	-1.010319	45.4	-1.006829	45.4	-1.021739	45.4	-1.020031	45.4	-0.9914829	45.4	-0.951708	45.4	-0.8632931	45.4	-0.932658	45.4	-0.8879771	45.4	-0.8895346	45.4	-0.8955512	45.4	-0.8910573	45.4	-0.8658742	45.4	-0.8669186
45.6	-0.9478959	45.6	-1.021111	45.6	-0.9799764	45.6	-0.9694135	45.6	-0.9891282	45.6	-0.9839597	45.6	-0.9571633	45.6	-0.9162804	45.6	-0.8299738	45.6	-0.8910778	45.6	-0.8514156	45.6	-0.8580036	45.6	-0.8545411	45.6	-0.854764	45.6	-0.8331416	45.6	-0.8346447
45.8	-0.9254428	45.8	-1.00015	45.8	-0.9511952	45.8	-0.946114	45.8	-0.9590747	45.8	-0.9569117	45.8	-0.9280814	45.8	-0.8913648	45.8	-0.7999103	45.8	-0.863007	45.8	-0.8184929	45.8	-0.82912	45.8	-0.830881	45.8	-0.8279032	45.8	-0.7982566	45.8	-0.7935407
46	-0.9009609	46	-0.9776331	46	-0.9302291	46	-0.915543	46	-0.9345128	46	-0.9319595	46	-0.906406	46	-0.8644056	46	-0.772608	46	-0.8370191	46	-0.7925725	46	-0.8038136	46	-0.8031898	46	-0.7999961	46	-0.7773197	46	-0.7758203
46.2	-0.8762321	46.2	-0.9569134	46.2	-0.9046764	46.2	-0.8962994	46.2	-0.9136612	46.2	-0.9145485	46.2	-0.8832389	46.2	-0.8471447	46.2	-0.7518542	46.2	-0.8101494	46.2	-0.7774138	46.2	-0.7785661	46.2	-0.7836818	46.2	-0.7760117	46.2	-0.7549227	46.2	-0.7480857
46.4	-0.8627602	46.4	-0.9339987	46.4	-0.8893757	46.4	-0.8784965	46.4	-0.8954729	46.4	-0.8908524	46.4	-0.8634307	46.4	-0.8266732	46.4	-0.7344667	46.4	-0.7984075	46.4	-0.7600765	46.4	-0.7722226	46.4	-0.7677931	46.4	-0.7611402	46.4	-0.7322672	46.4	-0.7319424
46.6	-0.8467585	46.6	-0.9208799	46.6	-0.8727781	46.6	-0.859253	46.6	-0.8843554	46.6	-0.8758019	46.6	-0.847635	46.6	-0.8061639	46.6	-0.7176342	46.6	-0.7868599	46.6	-0.7410845	46.6	-0.7478289	46.6	-0.7498605	46.6	-0.7438481	46.6	-0.7200866	46.6	-0.7158508
46.8	-0.8304507	46.8	-0.9045493	46.8	-0.8593538	46.8	-0.8478318	46.8	-0.8656858	46.8	-0.8584343	46.8	-0.8378891	46.8	-0.7980183	46.8	-0.701784	46.8	-0.7637342	46.8	-0.7335038	46.8	-0.7323375	46.8	-0.7367986	46.8	-0.7249784	46.8	-0.705046	46.8	-0.70486
47	-0.8178168	47	-0.8923014	47	-0.8402417	47	-0.8347908	47	-0.8541818	47	-0.8496376	47	-0.8229109	47	-0.7846051	47	-0.6909249	47	-0.7530313	47	-0.7142892	47	-0.718845	47	-0.7217638	47	-0.7147153	47	-0.6873904	47	-0.6889245
47.2	-0.8034664	47.2	-0.8802021	47.2	-0.8355955	47.2	-0.8253818	47.2	-0.8412477	47.2	-0.8332396	47.2	-0.8068066	47.2	-0.7731353	47.2	-0.6796476	47.2	-0.7399713	47.2	-0.7030544	47.2	-0.7084882	47.2	-0.7149643	47.2	-0.7035997	47.2	-0.6840225	47.2	-0.6794122
47.4	-0.7964712	47.4	-0.8715091	47.4	-0.8236849	47.4	-0.8146747	47.4	-0.8346857	47.4	-0.8226675	47.4	-0.7959906	47.4	-0.7613845	47.4	-0.6665851	47.4	-0.7308276	47.4	-0.689234	47.4	-0.6956369	47.4	-0.7036051	47.4	-0.6932366	47.4	-0.6657973	47.4	-0.6670295
47.6	-0.7844235	47.6	-0.8612778	47.6	-0.8142679	47.6	-0.8016468	47.6	-0.823301	47.6	-0.818675	47.6	-0.7923532	47.6	-0.7544159	47.6	-0.6572296	47.6	-0.7133911	47.6	-0.6792135	47.6	-0.6866496	47.6	-0.6886175	47.6	-0.6798113	47.6	-0.6625717	47.6	-0.6502662
47.8	-0.7730713	47.8	-0.8487499	47.8	-0.8051168	47.8	-0.7881318	47.8	-0.8128653	47.8	-0.8026829	47.8	-0.7776865	47.8	-0.7431815	47.8	-0.6489928	47.8	-0.7114667	47.8	-0.6710942	47.8	-0.6758403	47.8	-0.6785975	47.8	-0.6708426	47.8	-0.6529567	47.8	-0.6489823
48	-0.7688163	48	-0.8428968	48	-0.7971911	48	-0.7828187	48	-0.8055858	48	-0.793724	48	-0.7741948	48	-0.7349969	48	-0.6385598	48	-0.699247	48	-0.6606888	48	-0.6676111	48	-0.6708434	48	-0.6639012	48	-0.640243	48	-0.6394419
48.2	-0.762018	48.2	-0.8359987	48.2	-0.7852529	48.2	-0.7729786	48.2	-0.7954171	48.2	-0.7870688	48.2	-0.7595931	48.2	-0.7237629	48.2	-0.6300602	48.2	-0.6903539	48.2	-0.6546493	48.2	-0.6618522	48.2	-0.6625677	48.2	-0.6497815	48.2	-0.6320817	48.2	-0.6298024
48.4	-0.7536774	48.4	-0.827856	48.4	-0.7811801	48.4	-0.7668049	48.4	-0.7854138	48.4	-0.7774584	48.4	-0.7586998	48.4	-0.7156423	48.4	-0.6272879	48.4	-0.6845261	48.4	-0.6501492	48.4	-0.6516327	48.4	-0.6566728	48.4	-0.6488951	48.4	-0.6271878	48.4	-0.621168
48.6	-0.7454363	48.6	-0.8164479	48.6	-0.774991	48.6	-0.7608967	48.6	-0.7782197	48.6	-0.7694311	48.6	-0.7454328	48.6	-0.7070541	48.6	-0.6203539	48.6	-0.6788312	48.6	-0.6448472	48.6	-0.6480623	48.6	-0.6494103	48.6	-0.6368425	48.6	-0.6210924	48.6	-0.6155682
48.8	-0.7342574	48.8	-0.8121352	48.8	-0.7670594	48.8	-0.751379	48.8	-0.7747341	48.8	-0.7654259	48.8	-0.7392015	48.8	-0.7054086	48.8	-0.6098365	48.8	-0.6673982	48.8	-0.631902	48.8	-0.6389949	48.8	-0.6440016	48.8	-0.6342875	48.8	-0.6146329	48.8	-0.6079526
49	-0.7288634	49	-0.8028352	49	-0.7591987	49	-0.7445568	49	-0.7664417	49	-0.7570261	49	-0.7357399	49	-0.6955971	49	-0.6021841	49	-0.6688157	49	-0.6273596	49	-0.6363642	49	-0.6363537	49	-0.6274598	49	-0.6088309	49	-0.5989916
49.2	-0.7279245	49.2	-0.8018337	49.2	-0.752421	49.2	-0.7389864	49.2	-0.7577205	49.2	-0.7509062	49.2	-0.7253107	49.2	-0.6865267	49.2	-0.5962477	49.2	-0.6566148	49.2	-0.6215794	49.2	-0.6263011	49.2	-0.6325532	49.2	-0.6142254	49.2	-0.601905	49.2	-0.5940347
49.4	-0.7205663	49.4	-0.7925246	49.4	-0.7465113	49.4	-0.73303	49.4	-0.7543181	49.4	-0.74207	49.4	-0.7195041	49.4	-0.6871945	49.4	-0.5882667	49.4	-0.6547717	49.4	-0.6175714	49.4	-0.6210258	49.4	-0.6253095	49.4	-0.6137613	49.4	-0.5917786	49.4	-0.5856503
49.6	-0.712607	49.6	-0.7894641	49.6	-0.7418708	49.6	-0.7321475	49.6	-0.7493883	49.6	-0.7413085	49.6	-0.7108934	49.6	-0.680423	49.6	-0.589041	49.6	-0.6463316	49.6	-0.6118104	49.6	-0.6193643	49.6	-0.6185578	49.6	-0.6131734	49.6	-0.5896467	49.6	-0.5839888
49.8	-0.710517	49.8	-0.7866709	49.8	-0.7368004	49.8	-0.7245143	49.8	-0.7437814	49.8	-0.7400546	49.8	-0.7127784	49.8	-0.6758163	49.8	-0.5850981	49.8	-0.645146	49.8	-0.6068808	49.8	-0.6169751	49.8	-0.6173115	49.8	-0.6043931	49.8	-0.5888039	49.8	-0.5814031
50	-4.879962	50	-5.117132	50	-5.042187	50	-5.062056	50	-5.085349	50	-5.115603	50	-5.091578	50	-4.945461	50	-4.652455	50	-4.84648	50	-4.829299	50	-4.775555	50	-4.832165	50	-4.833559	50	-4.774656	50	-4.7445
50.2	-5.163092	50.2	-5.408799	50.2	-5.297697	50.2	-5.356635	50.2	-5.352301	50.2	-5.406981	50.2	-5.3698	50.2	-5.169508	50.2	-4.926052	50.2	-5.112033	50.2	-5.080385	50.2	-5.076829	50.2	-5.061883	50.2	-5.132124	50.2	-4.997993	50.2	-4.966945
50.4	-5.294776	50.4	-5.537934	50.4	-5.41283	50.4	-5.49152	50.4	-5.467713	50.4	-5.542658	50.4	-5.497425	50.4	-5.283053	50.4	-5.04004	50.4	-5.224621	50.4	-5.185067	50.4	-5.203348	50.4	-5.171234	50.4	-5.251928	50.4	-5.106711	50.4	-5.068888
50.6	-5.373127	50.6	-5.607531	50.6	-5.486602	50.6	-5.564	50.6	-5.543714	50.6	-5.618612	50.6	-5.561652	50.6	-5.350997	50.6	-5.10921	50.6	-5.298944	50.6	-5.252462	50.6	-5.274343	50.6	-5.235555	50.6	-5.327321	50.6	-5.172334	50.6	-5.133162
50.8	-5.420362	50.8	-5.663458	50.8	-5.537169	50.8	-5.619662	50.8	-5.592517	50.8	-5.6662	50.8	-5.621607	50.8	-5.401702	50.8	-5.156037	50.8	-5.347971	50.8	-5.303055	50.8	-5.326914	50.8	-5.282833	50.8	-5.376419	50.8	-5.222075	50.8	-5.183357
51	-5.460054	51	-5.704767	51	-5.572017	51	-5.6566	51	-5.625055	51	-5.704512	51	-5.662378	51	-5.436141	51	-5.193644	51	-5.381354	51	-5.335734	51	-5.359252	51	-5.319734	51	-5.413414	51	-5.258037	51	-5.219526
51.2	-5.496658	51.2	-5.730161	51.2	-5.607143	51.2	-5.682419	51.2	-5.65522	51.2	-5.738572	51.2	-5.692547	51.2	-5.46151	51.2	-5.229025	51.2	-5.412084	51.2	-5.36838	51.2	-5.392139	51.2	-5.349265	51.2	-5.445455	51.2	-5.291396	51.2	-5.246732
51.4	-5.518302	51.4	-5.764108	51.4	-5.629239	51.4	-5.71818	51.4	-5.683912	51.4	-5.769261	51.4	-5.72333	51.4	-5.488764	51.4	-5.254951	51.4	-5.441596	51.4	-5.396803	51.4	-5.417274	51.4	-5.374227	51.4	-5.474962	51.4	-5.31401	51.4	-5.274401
51.6	-5.541268	51.6	-5.786397	51.6	-5.65891	51.6	-5.737889	51.6	-5.71334	51.6	-5.789774	51.6	-5.740709	51.6	-5.513037	51.6	-5.275458	51.6	-5.464855	51.6	-5.415543	51.6	-5.445001	51.6	-5.396512	51.6	-5.491998	51.6	-5.335693	51.6	-5.29565
51.8	-5.559531	51.8	-5.806436	51.8	-5.672444	51.8	-5.761492	51.8	-5.72994	51.8	-5.8149	51.8	-5.762738	51.8	-5.532818	51.8	-5.299995	51.8	-5.485531	51.8	-5.438627	51.8	-5.462544	51.8	-5.419292	51.8	-5.517384	51.8	-5.359077	51.8	-5.313231
52	-5.580782	52	-5.82655	52	-5.691229	52	-5.777037	52	-5.747737	52	-5.83224	52	-5.779697	52	-5.54817	52	-5.304153	52	-5.500408	52	-5.454756	52	-5.482431	52	-5.433217	52	-5.527811	52	-5.374787	52	-5.33318
52.2	-5.597187	52.2	-5.841556	52.2	-5.710755	52.2	-5.793015	52.2	-5.763079	52.2	-5.846311	52.2	-5.796853	52.2	-5.563114	52.2	-5.326339	52.2	-5.515617	52.2	-5.470398	52.2	-5.499525	52.2	-5.444873	52.2	-5.546945	52.2	-5.388162	52.2	-5.346684
52.4	-5.608778	52.4	-5.855385	52.4	-5.722369	52.4	-5.810765	52.4	-5.77771	52.4	-5.861264	52.4	-5.810131	52.4	-5.583641	52.4	-5.343503	52.4	-5.53336	52.4	-5.485962	52.4	-5.514514	52.4	-5.460247	52.4	-5.561656	52.4	-5.405627	52.4	-5.362943
52.6	-5.623005	52.6	-5.874251	52.6	-5.736516	52.6	-5.823997	52.6	-5.793761	52.6	-5.873065	52.6	-5.821733	52.6	-5.595208	52.6	-5.352535	52.6	-5.544627	52.6	-5.498093	52.6	-5.525953	52.6	-5.474859	52.6	-5.574107	52.6	-5.41808	52.6	-5.372883
52.8	-5.639925	52.8	-5.878219	52.8	-5.747207	52.8	-5.832415	52.8	-5.804049	52.8	-5.886191	52.8	-5.833957	52.8	-5.607821	52.8	-5.36518	52.8	-5.556865	52.8	-5.509941	52.8	-5.537028	52.8	-5.484825	52.8	-5.587204	52.8	-5.428495	52.8	-5.383815
53	-5.647478	53	-5.896873	53	-5.763883	53	-5.848102	53	-5.818393	53	-5.899881	53	-5.853572	53	-5.615735	53	-5.372525	53	-5.568033	53	-5.517944	53	-5.554065	53	-5.497615	53	-5.592233	53	-5.438912	53	-5.392049
53.2	-5.659403	53.2	-5.910263	53.2	-5.771738	53.2	-5.853057	53.2	-5.826343	53.2	-5.916215	53.2	-5.858581	53.2	-5.624157	53.2	-5.386884	53.2	-5.574359	53.2	-5.530418	53.2	-5.556988	53.2	-5.510744	53.2	-5.602833	53.2	-5.4484	53.2	-5.401711
53.4	-5.672705	53.4	-5.916414	53.4	-5.779144	53.4	-5.864496	53.4	-5.837326	53.4	-5.921161	53.4	-5.871066	53.4	-5.636358	53.4	-5.395159	53.4	-5.582843	53.4	-5.536439	53.4	-5.571016	53.4	-5.517432	53.4	-5.614049	53.4	-5.458831	53.4	-5.412784
53.6	-5.678035	53.6	-5.928195	53.6	-5.793439	53.6	-5.87529	53.6	-5.845438	53.6	-5.931578	53.6	-5.874991	53.6	-5.64715	53.6	-5.404238	53.6	-5.597165	53.6	-5.548364	53.6	-5.574193	53.6	-5.524648	53.6	-5.62658	53.6	-5.466108	53.6	-5.423466
53.8	-5.686992	53.8	-5.93808	53.8	-5.801746	53.8	-5.889012	53.8	-5.855339	53.8	-5.935382	53.8	-5.89267	53.8	-5.656668	53.8	-5.416575	53.8	-5.604471	53.8	-5.559047	53.8	-5.584045	53.8	-5.528754	53.8	-5.629157	53.8	-5.478436	53.8	-5.432188
54	-5.699742	54	-5.945251	54	-5.807124	54	-5.894922	54	-5.867309	54	-5.947456	54	-5.896855	54	-5.66683	54	-5.422648	54	-5.614003	54	-5.563724	54	-5.596316	54	-5.542302	54	-5.64179	54	-5.483827	54	-5.437967
54.2	-5.707069	54.2	-5.95777	54.2	-5.813635	54.2	-5.904818	54.2	-5.872365	54.2	-5.951828	54.2	-5.908108	54.2	-5.670987	54.2	-5.427976	54.2	-5.616881	54.2	-5.57209	54.2	-5.600765	54.2	-5.545905	54.2	-5.651784	54.2	-5.48854	54.2	-5.450136
54.4	-5.712457	54.4	-5.959936	54.4	-5.822276	54.4	-5.906116	54.4	-5.881272	54.4	-5.965413	54.4	-5.915013	54.4	-5.681935	54.4	-5.435149	54.4	-5.623307	54.4	-5.577238	54.4	-5.60429	54.4	-5.55128	54.4	-5.656566	54.4	-5.495979	54.4	-5.453084
54.6	-5.721693	54.6	-5.963776	54.6	-5.829827	54.6	-5.913994	54.6	-5.884623	54.6	-5.970259	54.6	-5.91771	54.6	-5.685259	54.6	-5.442588	54.6	-5.634199	54.6	-5.583925	54.6	-5.615914	54.6	-5.560298	54.6	-5.662926	54.6	-5.506078	54.6	-5.460204
54.8	-5.722208	54.8	-5.974433	54.8	-5.837357	54.8	-5.917462	54.8	-5.890143	54.8	-5.970551	54.8	-5.924034	54.8	-5.689547	54.8	-5.44633	54.8	-5.635433	54.8	-5.588014	54.8	-5.61938	54.8	-5.565747	54.8	-5.667834	54.8	-5.50716	54.8	-5.464455
55	-0.9981945	55	-1.09453	55	-1.021605	55	-1.01596	55	-1.035903	55	-1.023098	55	-0.9722067	55	-0.9409977	55	-0.8546121	55	-0.9215738	55	-0.8937507	55	-0.8956921	55	-0.906631	55	-0.8923838	55	-0.8672319	55	-0.844292
55.2	-0.9553787	55.2	-1.046736	55.2	-0.9804407	55.2	-0.9730424	55.2	-0.9883574	55.2	-0.976992	55.2	-0.9290178	55.2	-0.8989162	55.2	-0.8352622	55.2	-0.9050086	55.2	-0.8570966	55.2	-0.8631353	55.2	-0.870819	55.2	-0.8572038	55.2	-0.8287764	55.2	-0.828013
55.4	-0.9103469	55.4	-0.9995329	55.4	-0.934164	55.4	-0.9245298	55.4	-0.9462711	55.4	-0.9374408	55.4	-0.8854343	55.4	-0.8615521	55.4	-0.7900373	55.4	-0.8691273	55.4	-0.8148448	55.4	-0.8177053	55.4	-0.8276566	55.4	-0.8096268	55.4	-0.7897792	55.4	-0.7835261
55.6	-0.8823761	55.6	-0.9714488	55.6	-0.9030479	55.6	-0.8937089	55.6	-0.9160365	55.6	-0.9028139	55.6	-0.8490909	55.6	-0.8251545	55.6	-0.7541135	55.6	-0.8237907	55.6	-0.7777935	55.6	-0.7814593	55.6	-0.7900184	55.6	-0.773389	55.6	-0.7486352	55.6	-0.7483522
55.8	-0.8534284	55.8	-0.9399877	55.8	-0.8805431	55.8	-0.8604451	55.8	-0.8836051	55.8	-0.8723166	55.8	-0.8243982	55.8	-0.7999821	55.8	-0.7242628	55.8	-0.7940094	55.8	-0.7498278	55.8	-0.7498559	55.8	-0.7623623	55.8	-0.7428545	55.8	-0.719442	55.8	-0.7189062
56	-0.828118	56	-0.9146847	56	-0.8513771	56	-0.8421839	56	-0.864661	56	-0.8460717	56	-0.7968727	56	-0.7768021	56	-0.6949498	56	-0.7724212	56	-0.7212892	56	-0.7276044	56	-0.7388678	56	-0.7165828	56	-0.6978015	56	-0.692767
56.2	-0.8081282	56.2	-0.896293	56.2	-0.8358129	56.2	-0.8210847	56.2	-0.8450147	56.2	-0.828479	56.2	-0.7802793	56.2	-0.7597151	56.2	-0.677143	56.2	-0.7503229	56.2	-0.7033698	56.2	-0.7072571	56.2	-0.7177231	56.2	-0.6938177	56.2	-0.6772627	56.2	-0.6691087
56.4	-0.7923924	56.4	-0.8795835	56.4	-0.8187717	56.4	-0.8018717	56.4	-0.8261926	56.4	-0.8057287	56.4	-0.7585171	56.4	-0.7390057	56.4	-0.6557745	56.4	-0.7345349	56.4	-0.6869407	56.4	-0.6898447	56.4	-0.6997104	56.4	-0.6765341	56.4	-0.6595436	56.4	-0.6538229
56.6	-0.7789964	56.6	-0.864534	56.6	-0.8016385	56.6	-0.7805253	56.6	-0.8089034	56.6	-0.7898717	56.6	-0.7423209	56.6	-0.7217821	56.6	-0.6456801	56.6	-0.7192799	56.6	-0.6712385	56.6	-0.6753605	56.6	-0.6796063	56.6	-0.6631839	56.6	-0.6440056	56.6	-0.6364586
56.8	-0.764196	56.8	-0.8443267	56.8	-0.7843902	56.8	-0.7700986	56.8	-0.80003	56.8	-0.7730545	56.8	-0.7292043	56.8	-0.7101516	56.8	-0.6333597	56.8	-0.7012557	56.8	-0.6500471	56.8	-0.6581643	56.8	-0.6650453	56.8	-0.6460162	56.8	-0.6290814	56.8	-0.6261169
57	-0.7486011	57	-0.8375745	57	-0.7769715	57	-0.7590126	57	-0.781539	57	-0.7608327	57	-0.7160224	57	-0.6979628	57	-0.615622	57	-0.6868864	57	-0.6424562	57	-0.6450585	57	-0.6554639	57	-0.6295615	57	-0.6177072	57	-0.6100906
57.2	-0.7388477	57.2	-0.8269402	57.2	-0.7644369	57.2	-0.7429952	57.2	-0.7701544	57.2	-0.7537829	57.2	-0.7051929	57.2	-0.6858114	57.2	-0.6019073	57.2	-0.677313	57.2	-0.6341667	57.2	-0.6346787	57.2	-0.6434157	57.2	-0.6205693	57.2	-0.6052347	57.2	-0.6016525
57.4	-0.72856	57.4	-0.8147455	57.4	-0.7540079	57.4	-0.7296534	57.4	-0.7663195	57.4	-0.7414226	57.4	-0.6934609	57.4	-0.6728032	57.4	-0.5952226	57.4	-0.6684532	57.4	-0.6219233	57.4	-0.624281	57.4	-0.6321162	57.4	-0.6073478	57.4	-0.5949466	57.4	-0.5870507
57.6	-0.7198961	57.6	-0.8079633	57.6	-0.7473201	57.6	-0.721927	57.6	-0.7532445	57.6	-0.7303935	57.6	-0.6856429	57.6	-0.6630553	57.6	-0.5833426	57.6	-0.6511653	57.6	-0.6097587	57.6	-0.6183012	57.6	-0.6252553	57.6	-0.6019512	57.6	-0.5823869	57.6	-0.5795088
57.8	-0.7065734	57.8	-0.7954252	57.8	-0.7357596	57.8	-0.7170342	57.8	-0.7405581	57.8	-0.7160121	57.8	-0.6806136	57.8	-0.655457	57.8	-0.5784178	57.8	-0.6404455	57.8	-0.5988719	57.8	-0.6028984	57.8	-0.6128801	57.8	-0.5871937	57.8	-0.575814	57.8	-0.5688493
58	-0.7015494	58	-0.7863555	58	-0.7252283	58	-0.7057446	58	-0.7366246	58	-0.7119535	58	-0.663611	58	-0.6469168	58	-0.5649759	58	-0.6374567	58	-0.5907769	58	-0.5996101	58	-0.6035767	58	-0.583552	58	-0.5677791	58	-0.5618414
58.2	-0.6909159	58.2	-0.7852793	58.2	-0.7135207	58.2	-0.699214	58.2	-0.7273395	58.2	-0.7038686	58.2	-0.6583008	58.2	-0.6366274	58.2	-0.5586321	58.2	-0.6314576	58.2	-0.5864238	58.2	-0.5884442	58.2	-0.597545	58.2	-0.5745159	58.2	-0.5594034	58.2	-0.5530455
58.4	-0.6861118	58.4	-0.7727306	58.4	-0.7142619	58.4	-0.6877732	58.4	-0.7208529	58.4	-0.6975712	58.4	-0.6488373	58.4	-0.6293574	58.4	-0.5502166	58.4	-0.6254984	58.4	-0.5771942	58.4	-0.579824	58.4	-0.5877143	58.4	-0.5639871	58.4	-0.5528672	58.4	-0.5461623
58.6	-0.6764577	58.6	-0.7647123	58.6	-0.7046683	58.6	-0.6844677	58.6	-0.7115971	58.6	-0.6891462	58.6	-0.6415891	58.6	-0.6250295	58.6	-0.5447335	58.6	-0.6144543	58.6	-0.56897	58.6	-0.5754818	58.6	-0.5796405	58.6	-0.5572475	58.6	-0.5406824	58.6	-0.5384178
58.8	-0.6687174	58.8	-0.7562189	58.8	-0.7021555	58.8	-0.6767372	58.8	-0.7060686	58.8	-0.6821611	58.8	-0.6347019	58.8	-0.6164615	58.8	-0.5354384	58.8	-0.6091721	58.8	-0.5633315	58.8	-0.5699749	58.8	-0.5759463	58.8	-0.5578794	58.8	-0.5366386	58.8	-0.5326104
59	-0.6714587	59	-0.7505552	59	-0.6985912	59	-0.6702572	59	-0.7000632	59	-0.6719846	59	-0.6260793	59	-0.6139967	59	-0.528192	59	-0.6052667	59	-0.5581331	59	-0.5559923	59	-0.5687082	59	-0.5486954	59	-0.5361623	59	-0.5297155
59.2	-0.6595753	59.2	-0.7430743	59.2	-0.6846032	59.2	-0.6624622	59.2	-0.6976029	59.2	-0.6720323	59.2	-0.6255671	59.2	-0.6071009	59.2	-0.5230716	59.2	-0.5962801	59.2	-0.5494025	59.2	-0.5576665	59.2	-0.5644183	59.2	-0.5380805	59.2	-0.5279234	59.2	-0.5224841
59.4	-0.6569112	59.4	-0.7410066	59.4	-0.6805331	59.4	-0.6577242	59.4	-0.6885733	59.4	-0.6649619	59.4	-0.6193495	59.4	-0.6027279	59.4	-0.5222155	59.4	-0.5890186	59.4	-0.5462249	59.4	-0.5527088	59.4	-0.5575306	59.4	-0.5350919	59.4	-0.5215586	59.4	-0.5164256
59.6	-0.6514759	59.6	-0.7348101	59.6	-0.6781101	59.6	-0.6518656	59.6	-0.6845044	59.6	-0.6637869	59.6	-0.6127969	59.6	-0.5959664	59.6	-0.51341	59.6	-0.5867721	59.6	-0.5424349	59.6	-0.5481375	59.6	-0.55407	59.6	-0.5330408	59.6	-0.5168407	59.6	-0.5104447
59.8	-0.6482313	59.8	-0.7317508	59.8	-0.6728808	59.8	-0.6503537	59.8	-0.6781291	59.8	-0.6544411	59.8	-0.6096052	59.8	-0.5933163	59.8	-0.5093753	59.8	-0.5850512	59.8	-0.5388752	59.8	-0.5463442	59.8	-0.5520892	59.8	-0.5272962	59.8	-0.5126926	59.8	-0.5067716
60	-0.5683502	60	-0.6514916	60	-0.5945615	60	-0.5695221	60	-0.6035783	60	-0.5732676	60	-0.5244169	60	-0.5123035	60	-0.4513457	60	-0.5211537	60	-0.4755849	60	-0.4783149	60	-0.4886937	60	-0.4695241	60	-0.4545986	60	-0.4540919
60.2	-0.5698557	60.2	-0.6426405	60.2	-0.5896305	60.2	-0.5650223	60.2	-0.6000656	60.2	-0.5688792	60.2	-0.5242709	60.2	-0.5141543	60.2	-0.4458634	60.2	-0.5139198	60.2	-0.4707576	60.2	-0.4774264	60.2	-0.4880288	60.2	-0.4612429	60.2	-0.4521971	60.2	-0.444737
60.4	-0.560845	60.4	-0.6429143	60.4	-0.5849636	60.4	-0.5556614	60.4	-0.5918818	60.4	-0.5685319	60.4	-0.5191202	60.4	-0.5077113	60.4	-0.442674	60.4	-0.5155077	60.4	-0.4685244	60.4	-0.4733761	60.4	-0.4850124	60.4	-0.4622388	60.4	-0.4493165	60.4	-0.4438418
60.6	-0.5619178	60.6	-0.6364324	60.6	-0.5775357	60.6	-0.5609139	60.6	-0.5905825	60.6	-0.5685612	60.6	-0.5148082	60.6	-0.5073627	60.6	-0.4447754	60.6	-0.5123851	60.6	-0.465799	60.6	-0.4720658	60.6	-0.4826086	60.6	-0.45894	60.6	-0.4421043	60.6	-0.4419555
60.8	-0.5607626	60.8	-0.633495	60.8	-0.579675	60.8	-0.5539716	60.8	-0.5889078	60.8	-0.562089	60.8	-0.5178694	60.8	-0.5035484	60.8	-0.4396251	60.8	-0.507113	60.8	-0.4657827	60.8	-0.4685209	60.8	-0.4810585	60.8	-0.4579588	60.8	-0.4474104	60.8	-0.4410211
61	-0.5577175	61	-0.6340439	61	-0.5743299	61	-0.5517333	61	-0.590108	61	-0.5580111	61	-0.5097639	61	-0.4967976	61	-0.4352962	61	-0.505337	61	-0.4600333	61	-0.4665521	61	-0.4811943	61	-0.4524278	61	-0.4427049	61	-0.4352711
61.2	-0.5538055	61.2	-0.6324938	61.2	-0.5713593	61.2	-0.5473911	61.2	-0.5784661	61.2	-0.5597541	61.2	-0.5096615	61.2	-0.5007765	61.2	-0.438318	61.2	-0.5022858	61.2	-0.4595489	61.2	-0.469216	61.2	-0.4733043	61.2	-0.4444349	61.2	-0.4414323	61.2	-0.4348578
61.4	-0.5547543	61.4	-0.6289617	61.4	-0.5727357	61.4	-0.5460064	61.4	-0.5809575	61.4	-0.556523	61.4	-0.5056162	61.4	-0.4963168	61.4	-0.4310492	61.4	-0.4988156	61.4	-0.4584067	61.4	-0.4660046	61.4	-0.473045	61.4	-0.4478776	61.4	-0.438573	61.4	-0.4345686
61.6	-0.5487439	61.6	-0.6296042	61.6	-0.5693938	61.6	-0.5431655	61.6	-0.579991	61.6	-0.5577719	61.6	-0.5016042	61.6	-0.4949235	61.6	-0.4314549	61.6	-0.4961252	61.6	-0.4537382	61.6	-0.4616374	61.6	-0.471641	61.6	-0.4421548	61.6	-0.4330032	61.6	-0.4299583
61.8	-0.5489709	61.8	-0.6212018	61.8	-0.5675311	61.8	-0.5480736	61.8	-0.5722395	61.8	-0.5531251	61.8	-0.5053546	61.8	-0.4915317	61.8	-0.4309392	61.8	-0.49401	61.8	-0.4534324	61.8	-0.461437	61.8	-0.4684687	61.8	-0.4433406	61.8	-0.433561	61.8	-0.4277008
62	-0.5438214	62	-0.6210925	62	-0.5664979	62	-0.5363821	62	-0.5759893	62	-0.5483178	62	-0.4993769	62	-0.4885393	62	-0.4302565	62	-0.495117	62	-0.4509143	62	-0.455078	62	-0.4676712	62	-0.4431687	62	-0.431124	62	-0.4258098
62.2	-0.540829	62.2	-0.618803	62.2	-0.5624684	62.2	-0.5379604	62.2	-0.5702781	62.2	-0.5474502	62.2	-0.4979753	62.2	-0.4863297	62.2	-0.4242116	62.2	-0.4912727	62.2	-0.4473239	62.2	-0.4572337	62.2	-0.4637745	62.2	-0.4356865	62.2	-0.4273302	62.2	-0.4254223
62.4	-0.5410805	62.4	-0.6169276	62.4	-0.5548432	62.4	-0.5339532	62.4	-0.5723459	62.4	-0.541269	62.4	-0.4943381	62.4	-0.4886444	62.4	-0.4217301	62.4	-0.4898135	62.4	-0.4467649	62.4	-0.4564516	62.4	-0.4628682	62.4	-0.436819	62.4	-0.4277599	62.4	-0.4209999
62.6	-0.5384888	62.6	-0.6092721	62.6	-0.5632148	62.6	-0.5338054	62.6	-0.5687135	62.6	-0.5408589	62.6	-0.4902467	62.6	-0.4804176	62.6	-0.4236924	62.6	-0.4843801	62.6	-0.4411277	62.6	-0.4552369	62.6	-0.4611707	62.6	-0.4347969	62.6	-0.4263449	62.6	-0.421573
62.8	-0.5365198	62.8	-0.6178432	62.8	-0.5585654	62.8	-0.5375991	62.8	-0.5636885	62.8	-0.5365547	62.8	-0.4890329	62.8	-0.4790381	62.8	-0.4200299	62.8	-0.4857619	62.8	-0.4432283	62.8	-0.4458773	62.8	-0.4597601	62.8	-0.4316427	62.8	-0.4236924	62.8	-0.4151444
63	-0.5349804	63	-0.6133559	63	-0.5546787	63	-0.5315061	63	-0.5590844	63	-0.5427541	63	-0.4887849	63	-0.4793792	63	-0.4162729	63	-0.4814725	63	-0.4381688	63	-0.4477364	63	-0.4550501	63	-0.4351194	63	-0.4233301	63	-0.418465
63.2	-0.5311704	63.2	-0.6074242	63.2	-0.5528919	63.2	-0.5292617	63.2	-0.5642955	63.2	-0.5339878	63.2	-0.4839139	63.2	-0.4746293	63.2	-0.4159413	63.2	-0.4821648	63.2	-0.439196	63.2	-0.4481273	63.2	-0.4560183	63.2	-0.4273723	63.2	-0.4226877	63.2	-0.4149873
63.4	-0.5307941	63.4	-0.6082383	63.4	-0.5513961	63.4	-0.529775	63.4	-0.561424	63.4	-0.531985	63.4	-0.4844067	63.4	-0.4785531	63.4	-0.4110448	63.4	-0.4830465	63.4	-0.4378635	63.4	-0.4445666	63.4	-0.4565583	63.4	-0.4294747	63.4	-0.4212723	63.4	-0.4128259
63.6	-0.5256733	63.6	-0.6028744	63.6	-0.5463272	63.6	-0.5267786	63.6	-0.5619346	63.6	-0.5312415	63.6	-0.4828384	63.6	-0.474689	63.6	-0.4123074	63.6	-0.4793095	63.6	-0.4343623	63.6	-0.4453561	63.6	-0.4552999	63.6	-0.4268703	63.6	-0.4172068	63.6	-0.4099
63.8	-0.5276343	63.8	-0.6012706	63.8	-0.5450215	63.8	-0.5268983	63.8	-0.5567421	63.8	-0.531143	63.8	-0.4845648	63.8	-0.4706663	63.8	-0.4067873	63.8	-0.4719334	63.8	-0.4353296	63.8	-0.4383748	63.8	-0.4502829	63.8	-0.4275595	63.8	-0.4130786	63.8	-0.4113696
64	-0.5269065	64	-0.6038309	64	-0.5467073	64	-0.5189334	64	-0.5554246	64	-0.5291733	64	-0.4840198	64	-0.4715899	64	-0.4083526	64	-0.4777924	64	-0.4317628	64	-0.4429613	64	-0.4520003	64	-0.4224015	64	-0.4142423	64	-0.4118225
64.2	-0.5268307	64.2	-0.5973279	64.2	-0.5450237	64.2	-0.520106	64.2	-0.5510848	64.2	-0.5283303	64.2	-0.4778747	64.2	-0.4692211	64.2	-0.4033017	64.2	-0.4735871	64.2	-0.42914	64.2	-0.4390806	64.2	-0.4486108	64.2	-0.4218582	64.2	-0.4164759	64.2	-0.4050751
64.4	-0.5250764	64.4	-0.5980369	64.4	-0.5419506	64.4	-0.5142724	64.4	-0.550373	64.4	-0.5242822	64.4	-0.474659	64.4	-0.4624443	64.4	-0.4077484	64.4	-0.472824	64.4	-0.4266672	64.4	-0.4388499	64.4	-0.4459635	64.4	-0.4186909	64.4	-0.4099598	64.4	-0.403917
64.6	-0.5172966	64.6	-0.6011992	64.6	-0.5434249	64.6	-0.5150211	64.6	-0.5445458	64.6	-0.5238914	64.6	-0.4751423	64.6	-0.4644842	64.6	-0.4073289	64.6	-0.4704655	64.6	-0.4277807	64.6	-0.4343096	64.6	-0.4490514	64.6	-0.4175988	64.6	-0.4077165	64.6	-0.4024069
64.8	-0.5246142	64.8	-0.595022	64.8	-0.534811	64.8	-0.5141181	64.8	-0.5514548	64.8	-0.5239142	64.8	-0.4721958	64.8	-0.4663449	64.8	-0.4020124	64.8	-0.4721424	64.8	-0.4241922	64.8	-0.4360814	64.8	-0.4399122	64.8	-0.422224	64.8	-0.4041654	64.8	-0.3971735
65	-0.5162486	65	-0.5958973	65	-0.5369917	65	-0.508055	65	-0.5465322	65	-0.5188063	65	-0.4686507	65	-0.4621738	65	-0.3987986	65	-0.4652674	65	-0.4206185	65	-0.4318774	65	-0.4422306	65	-0.4146121	65	-0.4055548	65	-0.4035381
65.2	-0.5117189	65.2	-0.5896217	65.2	-0.53731	65.2	-0.5110829	65.2	-0.5446828	65.2	-0.5222763	65.2	-0.4695807	65.2	-0.4561549	65.2	-0.39845	65.2	-0.4642549	65.2	-0.4218338	65.2	-0.4325703	65.2	-0.4373998	65.2	-0.414605	65.2	-0.4051919	65.2	-0.4002139
65.4	-0.5144564	65.4	-0.593756	65.4	-0.5359191	65.4	-0.5094277	65.4	-0.5426604	65.4	-0.5177488	65.4	-0.4720159	65.4	-0.4602775	65.4	-0.3961491	65.4	-0.4658686	65.4	-0.4224093	65.4	-0.431596	65.4	-0.4359915	65.4	-0.4117445	65.4	-0.4049088	65.4	-0.3902586
65.6	-0.5136124	65.6	-0.591285	65.6	-0.5340143	65.6	-0.5017062	65.6	-0.5434651	65.6	-0.5163488	65.6	-0.4682317	65.6	-0.4592208	65.6	-0.3937643	65.6	-0.4627488	65.6	-0.4176116	65.6	-0.4277113	65.6	-0.4370223	65.6	-0.4071749	65.6	-0.4029066	65.6	-0.391044
65.8	-0.5120417	65.8	-0.5887092	65.8	-0.5338044	65.8	-0.5070314	65.8	-0.5418304	65.8	-0.5126891	65.8	-0.4670284	65.8	-0.4528993	65.8	-0.3909134	65.8	-0.4623078	65.8	-0.4161708	65.8	-0.432012	65.8	-0.4318384	65.8	-0.4128734	65.8	-0.4011243	65.8	-0.3962024
66	-0.5088641	66	-0.5849473	66	-0.5285352	66	-0.5037019	66	-0.5361804	66	-0.5061183	66	-0.4620868	66	-0.4555565	66	-0.3950457	66	-0.4620988	66	-0.4158225	66	-0.4228411	66	-0.435674	66	-0.4093885	66	-0.3954667	66	-0.3899792
66.2	-0.5083444	66.2	-0.5871575	66.2	-0.5290429	66.2	-0.5091817	66.2	-0.5396891	66.2	-0.5139159	66.2	-0.4616361	66.2	-0.4514109	66.2	-0.3902418	66.2	-0.4576786	66.2	-0.41464	66.2	-0.4272341	66.2	-0.4383597	66.2	-0.4098615	66.2	-0.3959425	66.2	-0.3939
66.4	-0.5072721	66.4	-0.5846858	66.4	-0.5288414	66.4	-0.5042884	66.4	-0.535768	66.4	-0.5109078	66.4	-0.4632927	66.4	-0.4531194	66.4	-0.3904317	66.4	-0.4596466	66.4	-0.4120744	66.4	-0.4233621	66.4	-0.4341835	66.4	-0.4072977	66.4	-0.3934177	66.4	-0.3879825
66.6	-0.5048798	66.6	-0.5845779	66.6	-0.5205235	66.6	-0.5011105	66.6	-0.5350024	66.6	-0.5040671	66.6	-0.4684532	66.6	-0.4516487	66.6	-0.3887831	66.6	-0.4538864	66.6	-0.41019	66.6	-0.4229718	66.6	-0.4332975	66.6	-0.406548	66.6	-0.3974176	66.6	-0.3886389
66.8	-0.500396	66.8	-0.5820737	66.8	-0.5252581	66.8	-0.497705	66.8	-0.5312217	66.8	-0.507266	66.8	-0.4556437	66.8	-0.4450815	66.8	-0.3887725	66.8	-0.4547398	66.8	-0.4080413	66.8	-0.4173273	66.8	-0.4295228	66.8	-0.4058152	66.8	-0.3952401	66.8	-0.3840639
67	-0.5039266	67	-0.5775976	67	-0.5194889	67	-0.4995952	67	-0.5350332	67	-0.5063908	67	-0.4558719	67	-0.4458101	67	-0.390618	67	-0.4581748	67	-0.4077471	67	-0.4197589	67	-0.428017	67	-0.3995341	67	-0.3922103	67	-0.3906737
67.2	-0.5078203	67.2	-0.5785953	67.2	-0.5194066	67.2	-0.4988478	67.2	-0.5316691	67.2	-0.5065799	67.2	-0.4539389	67.2	-0.4476618	67.2	-0.3816033	67.2	-0.4544402	67.2	-0.4047922	67.2	-0.4187177	67.2	-0.4251136	67.2	-0.400298	67.2	-0.3910487	67.2	-0.386175
67.4	-0.5010709	67.4	-0.5700728	67.4	-0.5187975	67.4	-0.4978068	67.4	-0.5269571	67.4	-0.5023305	67.4	-0.4526374	67.4	-0.4440179	67.4	-0.3851313	67.4	-0.4533613	67.4	-0.4090746	67.4	-0.4195979	67.4	-0.4232148	67.4	-0.4002585	67.4	-0.38856	67.4	-0.3879063
67.6	-0.4937224	67.6	-0.5761137	67.6	-0.5183148	67.6	-0.4971288	67.6	-0.5238733	67.6	-0.4985841	67.6	-0.4495599	67.6	-0.4441983	67.6	-0.3816272	67.6	-0.4520007	67.6	-0.40393	67.6	-0.4135994	67.6	-0.4250563	67.6	-0.399555	67.6	-0.3858757	67.6	-0.3820932
67.8	-0.4998726	67.8	-0.5768843	67.8	-0.5165576	67.8	-0.4952968	67.8	-0.5229743	67.8	-0.4985193	67.8	-0.450659	67.8	-0.439891	67.8	-0.3783873	67.8	-0.4484142	67.8	-0.4046254	67.8	-0.4154953	67.8	-0.4224207	67.8	-0.3954685	67.8	-0.3839568	67.8	-0.3759846
68	-0.493426	68	-0.5752507	68	-0.5194024	68	-0.4868867	68	-0.5251697	68	-0.4933209	68	-0.4501715	68	-0.4365093	68	-0.3814718	68	-0.4531497	68	-0.3984436	68	-0.4134109	68	-0.4206098	68	-0.3938095	68	-0.3849559	68	-0.3856098
68.2	-0.4954035	68.2	-0.5716142	68.2	-0.5112377	68.2	-0.4909558	68.2	-0.5226491	68.2	-0.497556	68.2	-0.4442615	68.2	-0.4384331	68.2	-0.3751189	68.2	-0.4458043	68.2	-0.3997069	68.2	-0.4140071	68.2	-0.4201781	68.2	-0.3938637	68.2	-0.3870447	68.2	-0.3797766
68.4	-0.4971646	68.4	-0.5694259	68.4	-0.5165653	68.4	-0.4888231	68.4	-0.5244233	68.4	-0.4990615	68.4	-0.4458171	68.4	-0.4358935	68.4	-0.3778162	68.4	-0.4435378	68.4	-0.3984275	68.4	-0.4133842	68.4	-0.4180623	68.4	-0.3938898	68.4	-0.3858714	68.4	-0.3806436
68.6	-0.4910805	68.6	-0.5680174	68.6	-0.5112141	68.6	-0.4902572	68.6	-0.5208325	68.6	-0.4956559	68.6	-0.448945	68.6	-0.4329041	68.6	-0.3786947	68.6	-0.4479966	68.6	-0.3972554	68.6	-0.410477	68.6	-0.4159496	68.6	-0.3919765	68.6	-0.378563	68.6	-0.3777497
68.8	-0.4928076	68.8	-0.5680166	68.8	-0.5115678	68.8	-0.482911	68.8	-0.5197339	68.8	-0.4962457	68.8	-0.4454921	68.8	-0.4343259	68.8	-0.3755333	68.8	-0.446297	68.8	-0.3944176	68.8	-0.4073504	68.8	-0.414913	68.8	-0.3901428	68.8	-0.3791929	68.8	-0.3768718
69	-0.4914275	69	-0.5675528	69	-0.5090729	69	-0.4858676	69	-0.5192208	69	-0.4915876	69	-0.4449321	69	-0.4330041	69	-0.3730838	69	-0.4427479	69	-0.3945907	69	-0.4062688	69	-0.4157509	69	-0.383187	69	-0.3757411	69	-0.3770254
69.2	-0.4911594	69.2	-0.565453	69.2	-0.5081103	69.2	-0.4777305	69.2	-0.5152805	69.2	-0.4904652	69.2	-0.4415553	69.2	-0.4316021	69.2	-0.3732848	69.2	-0.4408559	69.2	-0.3933767	69.2	-0.4053687	69.2	-0.4115247	69.2	-0.3844604	69.2	-0.3744681	69.2	-0.3728601
69.4	-0.4900036	69.4	-0.5630226	69.4	-0.508065	69.4	-0.4798326	69.4	-0.5194949	69.4	-0.4907829	69.4	-0.4374368	69.4	-0.4355372	69.4	-0.3733793	69.4	-0.4373479	69.4	-0.3931295	69.4	-0.4060574	69.4	-0.4138734	69.4	-0.3887366	69.4	-0.376017	69.4	-0.3744478
69.6	-0.4887395	69.6	-0.5610834	69.6	-0.509488	69.6	-0.4749006	69.6	-0.5127233	69.6	-0.4894041	69.6	-0.4366761	69.6	-0.4245669	69.6	-0.3732011	69.6	-0.4403442	69.6	-0.394016	69.6	-0.4017964	69.6	-0.4098873	69.6	-0.3876208	69.6	-0.376522	69.6	-0.3721362
69.8	-0.486732	69.8	-0.5617718	69.8	-0.5037516	69.8	-0.4789666	69.8	-0.5122193	69.8	-0.4837891	69.8	-0.4384846	69.8	-0.429011	69.8	-0.372078	69.8	-0.4362172	69.8	-0.3867737	69.8	-0.4015211	69.8	-0.4086652	69.8	-0.3827668	69.8	-0.374687	69.8	-0.3730495
70	-0.4855698	70	-0.5607091	70	-0.5017939	70	-0.4760383	70	-0.5100285	70	-0.4879442	70	-0.4365538	70	-0.4300723	70	-0.3687724	70	-0.4356056	70	-0.3858764	70	-0.401015	70	-0.4087658	70	-0.3832671	70	-0.3753525	70	-0.3708118
70.2	-0.4835755	70.2	-0.5646747	70.2	-0.504186	70.2	-0.4764511	70.2	-0.5143323	70.2	-0.4793603	70.2	-0.4358376	70.2	-0.4280488	70.2	-0.3677062	70.2	-0.4379351	70.2	-0.3937311	70.2	-0.4020039	70.2	-0.4084267	70.2	-0.3846389	70.2	-0.3729319	70.2	-0.3690062
70.4	-0.4767781	70.4	-0.5607237	70.4	-0.5017844	70.4	-0.4774058	70.4	-0.5083573	70.4	-0.4836433	70.4	-0.4376253	70.4	-0.4261922	70.4	-0.3643358	70.4	-0.433899	70.4	-0.3889503	70.4	-0.3990769	70.4	-0.4042751	70.4	-0.3780592	70.4	-0.3694405	70.4	-0.3665837
70.6	-0.4803831	70.6	-0.5610271	70.6	-0.5023298	70.6	-0.4751749	70.6	-0.5067213	70.6	-0.4849051	70.6	-0.4340592	70.6	-0.4227605	70.6	-0.3663015	70.6	-0.4324459	70.6	-0.3899692	70.6	-0.399268	70.6	-0.4060832	70.6	-0.378364	70.6	-0.3718553	70.6	-0.3700325
70.8	-0.4820652	70.8	-0.5596709	70.8	-0.4957305	70.8	-0.4721268	70.8	-0.5105817	70.8	-0.4826457	70.8	-0.4318113	70.8	-0.4232992	70.8	-0.3645528	70.8	-0.4325905	70.8	-0.3887288	70.8	-0.3989267	70.8	-0.402355	70.8	-0.3786362	70.8	-0.3698086	70.8	-0.3609923
71	-0.4797589	71	-0.5551058	71	-0.5013044	71	-0.4731202	71	-0.5101605	71	-0.4787353	71	-0.4309844	71	-0.4247703	71	-0.3659211	71	-0.431445	71	-0.3854842	71	-0.3975799	71	-0.403423	71	-0.3752928	71	-0.3684205	71	-0.3638757
71.2	-0.47676	71.2	-0.5557651	71.2	-0.4995984	71.2	-0.4700156	71.2	-0.5041592	71.2	-0.4786629	71.2	-0.4250538	71.2	-0.4197111	71.2	-0.3659616	71.2	-0.426267	71.2	-0.3823681	71.2	-0.397093	71.2	-0.3978243	71.2	-0.380343	71.2	-0.3638664	71.2	-0.3670421
71.4	-0.4786153	71.4	-0.5528994	71.4	-0.4949882	71.4	-0.464671	71.4	-0.503598	71.4	-0.4757157	71.4	-0.4293502	71.4	-0.4236698	71.4	-0.3580707	71.4	-0.4297974	71.4	-0.3811363	71.4	-0.3930146	71.4	-0.4024205	71.4	-0.3800944	71.4	-0.3714242	71.4	-0.3625156
71.6	-0.480102	71.6	-0.5504564	71.6	-0.493752	71.6	-0.4756477	71.6	-0.5058546	71.6	-0.4786904	71.6	-0.4243902	71.6	-0.4177128	71.6	-0.3602813	71.6	-0.4309287	71.6	-0.3793311	71.6	-0.3932928	71.6	-0.3978549	71.6	-0.3727879	71.6	-0.3665849	71.6	-0.3606591
71.8	-0.4736153	71.8	-0.5507492	71.8	-0.4959308	71.8	-0.4687895	71.8	-0.5021865	71.8	-0.477313	71.8	-0.4285217	71.8	-0.4161311	71.8	-0.3548719	71.8	-0.4281756	71.8	-0.3842782	71.8	-0.3950325	71.8	-0.4013232	71.8	-0.3753407	71.8	-0.358763	71.8	-0.3608541
72	-0.4755312	72	-0.5510616	72	-0.4963807	72	-0.4665027	72	-0.5023329	72	-0.4701566	72	-0.4266748	72	-0.4144204	72	-0.3616621	72	-0.4254256	72	-0.3818035	72	-0.3930314	72	-0.3959611	72	-0.3732547	72	-0.3608908	72	-0.361335
72.2	-0.4740868	72.2	-0.5494314	72.2	-0.4920755	72.2	-0.4696572	72.2	-0.503158	72.2	-0.4711059	72.2	-0.4196185	72.2	-0.4135025	72.2	-0.3560762	72.2	-0.4239242	72.2	-0.3799163	72.2	-0.3879919	72.2	-0.3974481	72.2	-0.3711752	72.2	-0.3602555	72.2	-0.3583089
72.4	-0.4753373	72.4	-0.5468872	72.4	-0.4942718	72.4	-0.4638925	72.4	-0.4953378	72.4	-0.4689136	72.4	-0.4208987	72.4	-0.4168583	72.4	-0.3550175	72.4	-0.4261585	72.4	-0.3795631	72.4	-0.3909804	72.4	-0.3988176	72.4	-0.3673047	72.4	-0.3603469	72.4	-0.3594065
72.6	-0.4713359	72.6	-0.5438556	72.6	-0.4899112	72.6	-0.4636365	72.6	-0.4979696	72.6	-0.4742524	72.6	-0.4199626	72.6	-0.4131878	72.6	-0.3534484	72.6	-0.4237849	72.6	-0.3776354	72.6	-0.3896091	72.6	-0.3931357	72.6	-0.3674453	72.6	-0.3583102	72.6	-0.356764
72.8	-0.4636305	72.8	-0.5454972	72.8	-0.4874683	72.8	-0.4629292	72.8	-0.497403	72.8	-0.4736642	72.8	-0.4202057	72.8	-0.4131199	72.8	-0.354777	72.8	-0.4220717	72.8	-0.379198	72.8	-0.3939943	72.8	-0.3908215	72.8	-0.3666929	72.8	-0.3561374	72.8	-0.3551604
73	-0.4675929	73	-0.5462911	73	-0.487894	73	-0.4622134	73	-0.4955756	73	-0.4695843	73	-0.4153121	73	-0.4140359	73	-0.3527535	73	-0.4200574	73	-0.3794956	73	-0.3873265	73	-0.3884757	73	-0.3673584	73	-0.3612245	73	-0.3520562
73.2	-0.4690925	73.2	-0.542905	73.2	-0.4814871	73.2	-0.4576434	73.2	-0.4952939	73.2	-0.4687515	73.2	-0.4153848	73.2	-0.4120352	73.2	-0.3489358	73.2	-0.4185987	73.2	-0.3749158	73.2	-0.3830485	73.2	-0.3954647	73.2	-0.3669023	73.2	-0.358439	73.2	-0.350683
73.4	-0.4646336	73.4	-0.5468276	73.4	-0.4855849	73.4	-0.4599395	73.4	-0.4946606	73.4	-0.4633079	73.4	-0.4184125	73.4	-0.4094085	73.4	-0.3569443	73.4	-0.4175149	73.4	-0.3734784	73.4	-0.3853072	73.4	-0.3892006	73.4	-0.3669364	73.4	-0.3595165	73.4	-0.3503146
73.6	-0.461411	73.6	-0.5400165	73.6	-0.4845851	73.6	-0.4591696	73.6	-0.4893173	73.6	-0.4634672	73.6	-0.4142969	73.6	-0.4096908	73.6	-0.3501109	73.6	-0.4195334	73.6	-0.3708106	73.6	-0.3827803	73.6	-0.3880741	73.6	-0.3654802	73.6	-0.3551399	73.6	-0.3517169
73.8	-0.4654303	73.8	-0.5411048	73.8	-0.4824832	73.8	-0.4562462	73.8	-0.4945289	73.8	-0.463828	73.8	-0.4174835	73.8	-0.4072578	73.8	-0.3509951	73.8	-0.4204316	73.8	-0.3724318	73.8	-0.3880295	73.8	-0.3901265	73.8	-0.3658114	73.8	-0.3524977	73.8	-0.3447858
74	-0.4579277	74	-0.5388131	74	-0.4816892	74	-0.4538889	74	-0.491136	74	-0.4592543	74	-0.4135759	74	-0.4085211	74	-0.3522247	74	-0.4161011	74	-0.3747723	74	-0.3772199	74	-0.3934585	74	-0.3596159	74	-0.3526912	74	-0.3497406
74.2	-0.462676	74.2	-0.5393358	74.2	-0.4811901	74.2	-0.4574775	74.2	-0.492397	74.2	-0.463182	74.2	-0.4147707	74.2	-0.4048115	74.2	-0.3489809	74.2	-0.4181705	74.2	-0.3681195	74.2	-0.3853143	74.2	-0.3895185	74.2	-0.3610555	74.2	-0.3506719	74.2	-0.3490062
74.4	-0.4648567	74.4	-0.5371643	74.4	-0.4821615	74.4	-0.4576097	74.4	-0.4893306	74.4	-0.4617585	74.4	-0.411612	74.4	-0.4048327	74.4	-0.3490353	74.4	-0.4131073	74.4	-0.3672722	74.4	-0.3793262	74.4	-0.3859663	74.4	-0.3607617	74.4	-0.3503721	74.4	-0.350031
74.6	-0.4636931	74.6	-0.5379355	74.6	-0.4784314	74.6	-0.4507861	74.6	-0.4872809	74.6	-0.4634776	74.6	-0.4101786	74.6	-0.4038334	74.6	-0.3458825	74.6	-0.4118044	74.6	-0.3676348	74.6	-0.3783753	74.6	-0.383954	74.6	-0.3568892	74.6	-0.3479518	74.6	-0.3471944
74.8	-0.463256	74.8	-0.5378672	74.8	-0.4811364	74.8	-0.4526892	74.8	-0.4881491	74.8	-0.4605247	74.8	-0.4098453	74.8	-0.4035593	74.8	-0.3438768	74.8	-0.412635	74.8	-0.3657632	74.8	-0.3769196	74.8	-0.3856506	74.8	-0.3572918	74.8	-0.349592	74.8	-0.3443836
75	-0.4612097	75	-0.5376846	75	-0.4774934	75	-0.4509973	75	-0.4872603	75	-0.4618565	75	-0.4056745	75	-0.4020963	75	-0.3448732	75	-0.4122113	75	-0.3678965	75	-0.3777238	75	-0.3797004	75	-0.3561335	75	-0.3494426	75	-0.3439806
75.2	-0.4569249	75.2	-0.5312484	75.2	-0.4807305	75.2	-0.4505564	75.2	-0.4852551	75.2	-0.4582498	75.2	-0.4047894	75.2	-0.4050083	75.2	-0.3431579	75.2	-0.4095026	75.2	-0.3655092	75.2	-0.376585	75.2	-0.3871811	75.2	-0.3617295	75.2	-0.3499272	75.2	-0.3462148
75.4	-0.4576415	75.4	-0.5340526	75.4	-0.4732907	75.4	-0.4486889	75.4	-0.4842739	75.4	-0.457081	75.4	-0.4099492	75.4	-0.3981223	75.4	-0.3379935	75.4	-0.4116381	75.4	-0.3620628	75.4	-0.3730278	75.4	-0.3881775	75.4	-0.3560578	75.4	-0.345926	75.4	-0.345189
75.6	-0.457606	75.6	-0.5302373	75.6	-0.4735871	75.6	-0.450387	75.6	-0.4804688	75.6	-0.4521361	75.6	-0.4080557	75.6	-0.4072201	75.6	-0.3407568	75.6	-0.4121246	75.6	-0.3657556	75.6	-0.3738077	75.6	-0.3855059	75.6	-0.3563204	75.6	-0.3444129	75.6	-0.3454709
75.8	-0.4537005	75.8	-0.5372567	75.8	-0.4751994	75.8	-0.447776	75.8	-0.4822911	75.8	-0.459961	75.8	-0.4061692	75.8	-0.398758	75.8	-0.3394715	75.8	-0.4053122	75.8	-0.3635175	75.8	-0.3795432	75.8	-0.3814904	75.8	-0.3535928	75.8	-0.3404356	75.8	-0.3447552
76	-0.4548098	76	-0.533423	76	-0.4764726	76	-0.4447567	76	-0.4834494	76	-0.4520845	76	-0.4023166	76	-0.3984117	76	-0.3414849	76	-0.4082335	76	-0.3630199	76	-0.3725781	76	-0.3815924	76	-0.3538606	76	-0.3464429	76	-0.3417411
76.2	-0.4527307	76.2	-0.5276691	76.2	-0.4732313	76.2	-0.4452724	76.2	-0.4844525	76.2	-0.4532337	76.2	-0.40466	76.2	-0.3993948	76.2	-0.3374064	76.2	-0.4067	76.2	-0.3620104	76.2	-0.3734494	76.2	-0.3807791	76.2	-0.3516608	76.2	-0.3431891	76.2	-0.3414455
76.4	-0.451319	76.4	-0.5294997	76.4	-0.4655769	76.4	-0.4443749	76.4	-0.4775546	76.4	-0.4522552	76.4	-0.4024166	76.4	-0.398723	76.4	-0.3350042	76.4	-0.4048917	76.4	-0.3616625	76.4	-0.3730765	76.4	-0.375908	76.4	-0.348852	76.4	-0.3438029	76.4	-0.3398409
76.6	-0.4556415	76.6	-0.5241536	76.6	-0.471413	76.6	-0.4451598	76.6	-0.4755928	76.6	-0.4488355	76.6	-0.4011329	76.6	-0.3944095	76.6	-0.3360471	76.6	-0.4040399	76.6	-0.3567952	76.6	-0.3700386	76.6	-0.3753116	76.6	-0.3525864	76.6	-0.3447473	76.6	-0.3406811
76.8	-0.452324	76.8	-0.532275	76.8	-0.4665852	76.8	-0.4462464	76.8	-0.4754473	76.8	-0.4499117	76.8	-0.4002724	76.8	-0.395771	76.8	-0.3376656	76.8	-0.4027607	76.8	-0.3561902	76.8	-0.3727698	76.8	-0.3747702	76.8	-0.3564384	76.8	-0.3386342	76.8	-0.3356433
77	-0.4521988	77	-0.5287575	77	-0.4685783	77	-0.4455758	77	-0.474323	77	-0.4459389	77	-0.4056579	77	-0.3920651	77	-0.334651	77	-0.402332	77	-0.3569365	77	-0.3699773	77	-0.3785402	77	-0.3512648	77	-0.3386104	77	-0.3405259
77.2	-0.4529355	77.2	-0.5280049	77.2	-0.4679217	77.2	-0.4451412	77.2	-0.4802604	77.2	-0.4488404	77.2	-0.4009303	77.2	-0.3922655	77.2	-0.3321731	77.2	-0.4050144	77.2	-0.3559129	77.2	-0.3677424	77.2	-0.3739257	77.2	-0.346831	77.2	-0.3435363	77.2	-0.3377373
77.4	-0.4516591	77.4	-0.5235211	77.4	-0.46506	77.4	-0.4383244	77.4	-0.4739959	77.4	-0.4474454	77.4	-0.3968845	77.4	-0.3934542	77.4	-0.3347448	77.4	-0.4003674	77.4	-0.3524741	77.4	-0.368931	77.4	-0.3698337	77.4	-0.3476332	77.4	-0.3357412	77.4	-0.3396019
77.6	-0.4488317	77.6	-0.5245869	77.6	-0.4673212	77.6	-0.4408398	77.6	-0.4738459	77.6	-0.4419715	77.6	-0.3981494	77.6	-0.3912449	77.6	-0.3331648	77.6	-0.3991918	77.6	-0.3549636	77.6	-0.3709732	77.6	-0.3738134	77.6	-0.3468826	77.6	-0.3363675	77.6	-0.3351124
77.8	-0.4484352	77.8	-0.523599	77.8	-0.4659287	77.8	-0.4382053	77.8	-0.4734535	77.8	-0.4449613	77.8	-0.3965397	77.8	-0.3856699	77.8	-0.3348273	77.8	-0.3974846	77.8	-0.3541022	77.8	-0.3660203	77.8	-0.3740775	77.8	-0.3473157	77.8	-0.3381064	77.8	-0.3358054
78	-0.4448901	78	-0.5248772	78	-0.4612437	78	-0.4390832	78	-0.4705275	78	-0.4440377	78	-0.4004879	78	-0.3942027	78	-0.3322502	78	-0.3979976	78	-0.3516706	78	-0.3659811	78	-0.3750708	78	-0.3484691	78	-0.3385019	78	-0.334267
78.2	-0.4481866	78.2	-0.5244028	78.2	-0.4624809	78.2	-0.439139	78.2	-0.4758615	78.2	-0.4448607	78.2	-0.3972577	78.2	-0.3869372	78.2	-0.3302605	78.2	-0.398564	78.2	-0.3496961	78.2	-0.3668843	78.2	-0.3694442	78.2	-0.3458501	78.2	-0.3370122	78.2	-0.3347754
78.4	-0.4452162	78.4	-0.5238513	78.4	-0.4645795	78.4	-0.4407607	78.4	-0.4730477	78.4	-0.4459091	78.4	-0.3944015	78.4	-0.3871872	78.4	-0.3316855	78.4	-0.3987903	78.4	-0.3501999	78.4	-0.3637508	78.4	-0.3713408	78.4	-0.3422	78.4	-0.3351188	78.4	-0.33286
78.6	-0.4434788	78.6	-0.5222155	78.6	-0.4619419	78.6	-0.4354334	78.6	-0.4726378	78.6	-0.4432856	78.6	-0.3958618	78.6	-0.3878951	78.6	-0.3298715	78.6	-0.3993991	78.6	-0.3514332	78.6	-0.3684518	78.6	-0.370322	78.6	-0.3458882	78.6	-0.3341918	78.6	-0.3303029
78.8	-0.446322	78.8	-0.522647	78.8	-0.4609611	78.8	-0.43552	78.8	-0.4672422	78.8	-0.4405558	78.8	-0.3926153	78.8	-0.3891542	78.8	-0.3282204	78.8	-0.3950128	78.8	-0.3490186	78.8	-0.3602107	78.8	-0.3715371	78.8	-0.3411165	78.8	-0.3320646	78.8	-0.3310621
79	-0.4452566	79	-0.5187624	79	-0.4624487	79	-0.434921	79	-0.4689528	79	-0.4438594	79	-0.3927491	79	-0.3868165	79	-0.3304957	79	-0.3927364	79	-0.351175	79	-0.3621874	79	-0.3646051	79	-0.3470708	79	-0.3335719	79	-0.3294465
79.2	-0.4418293	79.2	-0.5194001	79.2	-0.4624864	79.2	-0.4352346	79.2	-0.4665679	79.2	-0.4411588	79.2	-0.3925184	79.2	-0.3888612	79.2	-0.3301087	79.2	-0.39512	79.2	-0.3459211	79.2	-0.3654851	79.2	-0.3676642	79.2	-0.3423535	79.2	-0.3291327	79.2	-0.3304802
79.4	-0.4437231	79.4	-0.515329	79.4	-0.4624246	79.4	-0.4269696	79.4	-0.4674923	79.4	-0.4369901	79.4	-0.3900383	79.4	-0.3817489	79.4	-0.3243222	79.4	-0.398576	79.4	-0.3457231	79.4	-0.3611584	79.4	-0.3643296	79.4	-0.340964	79.4	-0.3362625	79.4	-0.3262128
79.6	-0.4435877	79.6	-0.5181708	79.6	-0.4564081	79.6	-0.4294257	79.6	-0.4692358	79.6	-0.4399512	79.6	-0.3899504	79.6	-0.3834598	79.6	-0.3269038	79.6	-0.3878201	79.6	-0.3509445	79.6	-0.3650248	79.6	-0.3652576	79.6	-0.3389069	79.6	-0.3325193	79.6	-0.3292871
79.8	-0.4392895	79.8	-0.5123069	79.8	-0.4595984	79.8	-0.4326762	79.8	-0.4653157	79.8	-0.439559	79.8	-0.3829546	79.8	-0.3867302	79.8	-0.3242352	79.8	-0.3957661	79.8	-0.3491089	79.8	-0.361953	79.8	-0.3644423	79.8	-0.3425775	79.8	-0.3264688	79.8	-0.3325095
80	-0.4354457	80	-0.5178882	80	-0.4550666	80	-0.4302474	80	-0.4661394	80	-0.4362178	80	-0.3865849	80	-0.3798437	80	-0.324171	80	-0.3947908	80	-0.3450975	80	-0.3612143	80	-0.3617563	80	-0.3413199	80	-0.3285781	80	-0.3296851
80.2	-0.4439952	80.2	-0.512081	80.2	-0.4531737	80.2	-0.4312612	80.2	-0.4649712	80.2	-0.4400088	80.2	-0.3872443	80.2	-0.3803743	80.2	-0.326485	80.2	-0.387554	80.2	-0.3465051	80.2	-0.3597905	80.2	-0.3640628	80.2	-0.3392464	80.2	-0.3250042	80.2	-0.325089
80.4	-0.4398581	80.4	-0.5108492	80.4	-0.4539512	80.4	-0.4290104	80.4	-0.4635051	80.4	-0.4348596	80.4	-0.3871059	80.4	-0.3841234	80.4	-0.3207118	80.4	-0.3913664	80.4	-0.3417376	80.4	-0.3568483	80.4	-0.3656735	80.4	-0.3401716	80.4	-0.3301139	80.4	-0.3266912
80.6	-0.4373788	80.6	-0.5121958	80.6	-0.4572644	80.6	-0.4288181	80.6	-0.4628974	80.6	-0.4368033	80.6	-0.3864542	80.6	-0.3784931	80.6	-0.3245905	80.6	-0.3911119	80.6	-0.342501	80.6	-0.3536229	80.6	-0.3634064	80.6	-0.3360976	80.6	-0.3269616	80.6	-0.3275537
80.8	-0.4354868	80.8	-0.5087819	80.8	-0.4565874	80.8	-0.4304404	80.8	-0.4623962	80.8	-0.4372268	80.8	-0.3841821	80.8	-0.3775627	80.8	-0.3226899	80.8	-0.3884006	80.8	-0.3429671	80.8	-0.3561999	80.8	-0.3610556	80.8	-0.3316968	80.8	-0.3246194	80.8	-0.3238033
81	-0.4319609	81	-0.5154595	81	-0.4543091	81	-0.4243579	81	-0.4573481	81	-0.4338291	81	-0.3827815	81	-0.3766946	81	-0.3192797	81	-0.3874745	81	-0.3415138	81	-0.3547081	81	-0.3600893	81	-0.3344357	81	-0.3248602	81	-0.3209358
81.2	-0.4365233	81.2	-0.5129848	81.2	-0.4506828	81.2	-0.4226794	81.2	-0.4632295	81.2	-0.4304525	81.2	-0.3871661	81.2	-0.3789594	81.2	-0.3201006	81.2	-0.3855207	81.2	-0.3425682	81.2	-0.3548903	81.2	-0.365697	81.2	-0.3280476	81.2	-0.322713	81.2	-0.3267852
81.4	-0.4330635	81.4	-0.5123393	81.4	-0.454372	81.4	-0.4263482	81.4	-0.4618641	81.4	-0.4311903	81.4	-0.3862238	81.4	-0.3780902	81.4	-0.3227984	81.4	-0.3846274	81.4	-0.3378191	81.4	-0.353433	81.4	-0.3598759	81.4	-0.3332236	81.4	-0.3279973	81.4	-0.3227491
81.6	-0.4341828	81.6	-0.5092849	81.6	-0.4518275	81.6	-0.4249696	81.6	-0.4595691	81.6	-0.431361	81.6	-0.3765657	81.6	-0.377981	81.6	-0.3205236	81.6	-0.3841198	81.6	-0.3400603	81.6	-0.3507372	81.6	-0.3542733	81.6	-0.3332524	81.6	-0.3214247	81.6	-0.3212448
81.8	-0.4319441	81.8	-0.5070566	81.8	-0.4490356	81.8	-0.423474	81.8	-0.4584122	81.8	-0.4273089	81.8	-0.3833709	81.8	-0.3783712	81.8	-0.3188928	81.8	-0.3825537	81.8	-0.3384083	81.8	-0.3491003	81.8	-0.3594548	81.8	-0.3369488	81.8	-0.3262591	81.8	-0.3218158
82	-0.4341952	82	-0.5049974	82	-0.4492689	82	-0.425084	82	-0.455304	82	-0.4301745	82	-0.3795432	82	-0.3748237	82	-0.3181647	82	-0.3877403	82	-0.3402916	82	-0.3522893	82	-0.3582949	82	-0.3327506	82	-0.3214302	82	-0.3158399
82.2	-0.4349874	82.2	-0.507442	82.2	-0.4521644	82.2	-0.4255257	82.2	-0.4577729	82.2	-0.4256133	82.2	-0.3804407	82.2	-0.3696717	82.2	-0.3152004	82.2	-0.3823091	82.2	-0.3370585	82.2	-0.3529246	82.2	-0.3582618	82.2	-0.3302376	82.2	-0.3142072	82.2	-0.3170345
82.4	-0.431528	82.4	-0.5053777	82.4	-0.4479673	82.4	-0.4236569	82.4	-0.4550783	82.4	-0.4292267	82.4	-0.3790903	82.4	-0.3754687	82.4	-0.3161748	82.4	-0.3823007	82.4	-0.3360191	82.4	-0.3519713	82.4	-0.3527405	82.4	-0.3328162	82.4	-0.3185295	82.4	-0.320853
82.6	-0.4271111	82.6	-0.5046669	82.6	-0.4460609	82.6	-0.4205596	82.6	-0.4532427	82.6	-0.4310775	82.6	-0.3741218	82.6	-0.3726198	82.6	-0.3153928	82.6	-0.3841488	82.6	-0.3337297	82.6	-0.3493886	82.6	-0.3555542	82.6	-0.3292857	82.6	-0.3164227	82.6	-0.3184846
82.8	-0.4306965	82.8	-0.5079567	82.8	-0.448876	82.8	-0.4209784	82.8	-0.4531167	82.8	-0.4224904	82.8	-0.3751739	82.8	-0.374195	82.8	-0.3147622	82.8	-0.3870108	82.8	-0.3363709	82.8	-0.3514586	82.8	-0.3484627	82.8	-0.3321215	82.8	-0.3168466	82.8	-0.3182333
83	-0.4299737	83	-0.50832	83	-0.4427406	83	-0.4214591	83	-0.4520126	83	-0.4275533	83	-0.3763499	83	-0.371298	83	-0.3150371	83	-0.3814113	83	-0.3339837	83	-0.3486738	83	-0.3512681	83	-0.3279122	83	-0.3216903	83	-0.3152514
83.2	-0.4341869	83.2	-0.502778	83.2	-0.4434438	83.2	-0.4167711	83.2	-0.453619	83.2	-0.4225085	83.2	-0.3740539	83.2	-0.3719998	83.2	-0.3161945	83.2	-0.3816005	83.2	-0.3341564	83.2	-0.3451178	83.2	-0.3557269	83.2	-0.3312184	83.2	-0.319869	83.2	-0.3155627
83.4	-0.4310045	83.4	-0.4998132	83.4	-0.4422407	83.4	-0.4216166	83.4	-0.4485754	83.4	-0.4245266	83.4	-0.3738091	83.4	-0.3740704	83.4	-0.3093119	83.4	-0.3790424	83.4	-0.3354639	83.4	-0.3566297	83.4	-0.351212	83.4	-0.3305077	83.4	-0.3142032	83.4	-0.3150789
83.6	-0.4301977	83.6	-0.5077872	83.6	-0.4509259	83.6	-0.4198827	83.6	-0.4469841	83.6	-0.4246477	83.6	-0.3688638	83.6	-0.3704209	83.6	-0.3098965	83.6	-0.3848628	83.6	-0.3365649	83.6	-0.3475007	83.6	-0.3496853	83.6	-0.3274984	83.6	-0.3180478	83.6	-0.3145671
83.8	-0.4268149	83.8	-0.5042466	83.8	-0.4418127	83.8	-0.4147997	83.8	-0.448271	83.8	-0.425009	83.8	-0.3756988	83.8	-0.3721029	83.8	-0.3073778	83.8	-0.3795432	83.8	-0.3323669	83.8	-0.3451668	83.8	-0.3539204	83.8	-0.3280549	83.8	-0.3159315	83.8	-0.3123241
84	-0.4303964	84	-0.503596	84	-0.442724	84	-0.4110745	84	-0.4542092	84	-0.4219837	84	-0.372621	84	-0.3664765	84	-0.3105238	84	-0.3737242	84	-0.3315441	84	-0.3462086	84	-0.3517239	84	-0.3228072	84	-0.3104651	84	-0.3110607
84.2	-0.4295374	84.2	-0.4967734	84.2	-0.4367162	84.2	-0.4186312	84.2	-0.4485234	84.2	-0.4205262	84.2	-0.3720439	84.2	-0.3691201	84.2	-0.31314	84.2	-0.3745275	84.2	-0.333602	84.2	-0.3497385	84.2	-0.3475455	84.2	-0.325295	84.2	-0.3133501	84.2	-0.3130347
84.4	-0.4262807	84.4	-0.4950278	84.4	-0.4420665	84.4	-0.4151843	84.4	-0.4541452	84.4	-0.4240276	84.4	-0.3719349	84.4	-0.3679146	84.4	-0.3081124	84.4	-0.3765391	84.4	-0.3314914	84.4	-0.3468255	84.4	-0.3479471	84.4	-0.3269694	84.4	-0.3106889	84.4	-0.3127862
84.6	-0.4251806	84.6	-0.503768	84.6	-0.447038	84.6	-0.4126877	84.6	-0.4491264	84.6	-0.4216982	84.6	-0.3746509	84.6	-0.3653238	84.6	-0.3105495	84.6	-0.3770378	84.6	-0.3277411	84.6	-0.3432023	84.6	-0.3516336	84.6	-0.3212934	84.6	-0.3128795	84.6	-0.3127359
84.8	-0.4274586	84.8	-0.4989971	84.8	-0.4384632	84.8	-0.4145612	84.8	-0.4497472	84.8	-0.4172712	84.8	-0.3699951	84.8	-0.3651253	84.8	-0.3119964	84.8	-0.378516	84.8	-0.3291645	84.8	-0.3432127	84.8	-0.3478953	84.8	-0.3199992	84.8	-0.3104377	84.8	-0.3133105
85	-0.4230287	85	-0.4976941	85	-0.4391509	85	-0.4099239	85	-0.4439828	85	-0.4206187	85	-0.3638343	85	-0.3647691	85	-0.3045581	85	-0.375508	85	-0.3305897	85	-0.3391095	85	-0.3414822	85	-0.3210417	85	-0.3083837	85	-0.3117605
85.2	-0.425221	85.2	-0.4992537	85.2	-0.4421853	85.2	-0.4133933	85.2	-0.445996	85.2	-0.420727	85.2	-0.369467	85.2	-0.3663385	85.2	-0.30587	85.2	-0.3741346	85.2	-0.3233812	85.2	-0.3458304	85.2	-0.3474608	85.2	-0.3249362	85.2	-0.3203718	85.2	-0.3113756
85.4	-0.4182751	85.4	-0.4937319	85.4	-0.441685	85.4	-0.4157194	85.4	-0.4424471	85.4	-0.4173179	85.4	-0.3643066	85.4	-0.3677165	85.4	-0.3072798	85.4	-0.3758496	85.4	-0.3313996	85.4	-0.343699	85.4	-0.345029	85.4	-0.3226356	85.4	-0.3105821	85.4	-0.3041649
85.6	-0.4200874	85.6	-0.4962589	85.6	-0.4389314	85.6	-0.4086987	85.6	-0.440131	85.6	-0.4153597	85.6	-0.3674754	85.6	-0.3643677	85.6	-0.305539	85.6	-0.37712	85.6	-0.3282188	85.6	-0.3409468	85.6	-0.3418406	85.6	-0.3187305	85.6	-0.3129179	85.6	-0.3093493
85.8	-0.4195826	85.8	-0.4990793	85.8	-0.4389791	85.8	-0.4107252	85.8	-0.4449003	85.8	-0.413036	85.8	-0.3679434	85.8	-0.3631755	85.8	-0.3035964	85.8	-0.3716328	85.8	-0.3265751	85.8	-0.3371348	85.8	-0.3486859	85.8	-0.3232346	85.8	-0.3116611	85.8	-0.3042673
86	-0.4198869	86	-0.4917975	86	-0.4391512	86	-0.4105513	86	-0.4431734	86	-0.414333	86	-0.3643313	86	-0.361379	86	-0.308405	86	-0.3710258	86	-0.3268194	86	-0.3385872	86	-0.3439957	86	-0.3166957	86	-0.3110257	86	-0.305506
86.2	-0.4143927	86.2	-0.4914547	86.2	-0.4335396	86.2	-0.4078143	86.2	-0.442848	86.2	-0.4155243	86.2	-0.365371	86.2	-0.3602315	86.2	-0.3077776	86.2	-0.369799	86.2	-0.3254355	86.2	-0.3407851	86.2	-0.3425337	86.2	-0.3184709	86.2	-0.3089384	86.2	-0.3090677
86.4	-0.4187878	86.4	-0.4910604	86.4	-0.4357654	86.4	-0.4104895	86.4	-0.4385342	86.4	-0.417605	86.4	-0.362959	86.4	-0.3551458	86.4	-0.3060407	86.4	-0.3704048	86.4	-0.325429	86.4	-0.3415408	86.4	-0.3450772	86.4	-0.3162353	86.4	-0.3053908	86.4	-0.3067354
86.6	-0.4209524	86.6	-0.4898343	86.6	-0.4342478	86.6	-0.4059357	86.6	-0.4417627	86.6	-0.4197559	86.6	-0.3649475	86.6	-0.357895	86.6	-0.3035635	86.6	-0.3703582	86.6	-0.325099	86.6	-0.3359137	86.6	-0.3390884	86.6	-0.3209518	86.6	-0.3045968	86.6	-0.3087915
86.8	-0.4166245	86.8	-0.4916377	86.8	-0.4323527	86.8	-0.4058837	86.8	-0.4395187	86.8	-0.4095726	86.8	-0.3642616	86.8	-0.3576718	86.8	-0.3028517	86.8	-0.3635896	86.8	-0.3222964	86.8	-0.3378426	86.8	-0.3404882	86.8	-0.3183848	86.8	-0.3042018	86.8	-0.3054859
87	-0.41943	87	-0.4944577	87	-0.4338889	87	-0.4088468	87	-0.443555	87	-0.4115435	87	-0.3630105	87	-0.3625215	87	-0.3061772	87	-0.3693271	87	-0.3215932	87	-0.3394764	87	-0.340593	87	-0.3164298	87	-0.3085759	87	-0.3031652
87.2	-0.4188814	87.2	-0.492918	87.2	-0.4322613	87.2	-0.4017736	87.2	-0.4436239	87.2	-0.4097026	87.2	-0.3640068	87.2	-0.3608106	87.2	-0.3026922	87.2	-0.3720413	87.2	-0.3226283	87.2	-0.3310626	87.2	-0.3411356	87.2	-0.3149495	87.2	-0.3066099	87.2	-0.3083179
87.4	-0.4161076	87.4	-0.4895186	87.4	-0.4330005	87.4	-0.4033257	87.4	-0.43584	87.4	-0.4133731	87.4	-0.3627962	87.4	-0.3577184	87.4	-0.3030937	87.4	-0.3690025	87.4	-0.3219376	87.4	-0.3344991	87.4	-0.336962	87.4	-0.317385	87.4	-0.3051914	87.4	-0.2994606
87.6	-0.41643	87.6	-0.4929906	87.6	-0.4320765	87.6	-0.4041477	87.6	-0.438662	87.6	-0.4128178	87.6	-0.3604808	87.6	-0.3588974	87.6	-0.3035443	87.6	-0.3688877	87.6	-0.3222857	87.6	-0.3304709	87.6	-0.3349649	87.6	-0.3142525	87.6	-0.3016647	87.6	-0.3022379
87.8	-0.4128917	87.8	-0.4872001	87.8	-0.431485	87.8	-0.4062093	87.8	-0.4366525	87.8	-0.4094734	87.8	-0.3551269	87.8	-0.3579582	87.8	-0.2967381	87.8	-0.3668354	87.8	-0.3174274	87.8	-0.3368359	87.8	-0.3386248	87.8	-0.3142906	87.8	-0.2974576	87.8	-0.3067526
88	-0.4159059	88	-0.490742	88	-0.4279837	88	-0.4044595	88	-0.4412715	88	-0.4109134	88	-0.3589601	88	-0.3551796	88	-0.3098216	88	-0.3665227	88	-0.3180808	88	-0.3305028	88	-0.3364149	88	-0.3104558	88	-0.3046558	88	-0.3027126
88.2	-0.4133535	88.2	-0.492159	88.2	-0.4289852	88.2	-0.3996336	88.2	-0.4351099	88.2	-0.411799	88.2	-0.3569982	88.2	-0.3529747	88.2	-0.2992646	88.2	-0.3635166	88.2	-0.3170281	88.2	-0.3349372	88.2	-0.3378212	88.2	-0.3117045	88.2	-0.3026387	88.2	-0.2996457
88.4	-0.4208299	88.4	-0.4868988	88.4	-0.4281853	88.4	-0.4012641	88.4	-0.4389804	88.4	-0.4086508	88.4	-0.3573641	88.4	-0.3577495	88.4	-0.2993942	88.4	-0.3621385	88.4	-0.3189262	88.4	-0.3319465	88.4	-0.3371029	88.4	-0.3117092	88.4	-0.3023743	88.4	-0.3033114
88.6	-0.4122517	88.6	-0.4905847	88.6	-0.430935	88.6	-0.4015012	88.6	-0.4358657	88.6	-0.4086085	88.6	-0.3570785	88.6	-0.3531269	88.6	-0.298542	88.6	-0.3636201	88.6	-0.3209429	88.6	-0.3352358	88.6	-0.3366956	88.6	-0.3110446	88.6	-0.3010721	88.6	-0.2971484
88.8	-0.4098791	88.8	-0.4821319	88.8	-0.4346622	88.8	-0.4003017	88.8	-0.4315158	88.8	-0.4064122	88.8	-0.3587617	88.8	-0.3518505	88.8	-0.2964146	88.8	-0.3645607	88.8	-0.3164953	88.8	-0.331769	88.8	-0.3344805	88.8	-0.3117759	88.8	-0.2996977	88.8	-0.3025772
89	-0.4097687	89	-0.486732	89	-0.4285981	89	-0.3989382	89	-0.4322991	89	-0.4055469	89	-0.3557863	89	-0.352932	89	-0.2954792	89	-0.3599176	89	-0.3204964	89	-0.3284959	89	-0.3347859	89	-0.3081807	89	-0.3002773	89	-0.2982518
89.2	-0.4133827	89.2	-0.4846764	89.2	-0.4254959	89.2	-0.3961823	89.2	-0.4341351	89.2	-0.4030107	89.2	-0.3587837	89.2	-0.3549173	89.2	-0.3004706	89.2	-0.3628794	89.2	-0.3144114	89.2	-0.327908	89.2	-0.3379739	89.2	-0.3097867	89.2	-0.3005464	89.2	-0.2976443
89.4	-0.4100569	89.4	-0.4891809	89.4	-0.425016	89.4	-0.4002393	89.4	-0.4320859	89.4	-0.405268	89.4	-0.3533518	89.4	-0.3507066	89.4	-0.2953073	89.4	-0.3633261	89.4	-0.3125272	89.4	-0.3290266	89.4	-0.3339894	89.4	-0.312241	89.4	-0.2985986	89.4	-0.2987613
89.6	-0.4151395	89.6	-0.4856221	89.6	-0.4255021	89.6	-0.3974392	89.6	-0.4307712	89.6	-0.4020677	89.6	-0.3542581	89.6	-0.3474539	89.6	-0.2977274	89.6	-0.3622422	89.6	-0.3135829	89.6	-0.3334304	89.6	-0.335184	89.6	-0.3083792	89.6	-0.2978005	89.6	-0.300593
89.8	-0.4119968	89.8	-0.4832108	89.8	-0.4226483	89.8	-0.3984994	89.8	-0.4322141	89.8	-0.4054573	89.8	-0.3553107	89.8	-0.3493653	89.8	-0.2949339	89.8	-0.3630309	89.8	-0.3172905	89.8	-0.3280175	89.8	-0.3323626	89.8	-0.3090955	89.8	-0.2977305	89.8	-0.3014205
90	-0.4297774	90	-0.4977144	90	-0.4421583	90	-0.4142986	90	-0.44871	90	-0.4164241	90	-0.3601475	90	-0.3473442	90	-0.2903546	90	-0.3616592	90	-0.3178574	90	-0.3257613	90	-0.3342466	90	-0.3016639	90	-0.2941212	90	-0.2965531
90.2	-0.421475	90.2	-0.4923422	90.2	-0.4317067	90.2	-0.4085273	90.2	-0.435644	90.2	-0.4134515	90.2	-0.3525812	90.2	-0.343263	90.2	-0.2977991	90.2	-0.3619593	90.2	-0.3144878	90.2	-0.3259844	90.2	-0.3282505	90.2	-0.3049858	90.2	-0.2964754	90.2	-0.2959124
90.4	-0.4079416	90.4	-0.4819479	90.4	-0.4252484	90.4	-0.4005175	90.4	-0.4267343	90.4	-0.4056671	90.4	-0.3438529	90.4	-0.3401107	90.4	-0.2880904	90.4	-0.3548937	90.4	-0.3114153	90.4	-0.3322894	90.4	-0.3312002	90.4	-0.3068827	90.4	-0.2939052	90.4	-0.2896734
90.6	-0.3991564	90.6	-0.4717242	90.6	-0.4169092	90.6	-0.3888629	90.6	-0.4245616	90.6	-0.3935678	90.6	-0.3357839	90.6	-0.33671	90.6	-0.2906885	90.6	-0.357181	90.6	-0.3099194	90.6	-0.321914	90.6	-0.3280607	90.6	-0.3038543	90.6	-0.2943938	90.6	-0.2890638
90.8	-0.391113	90.8	-0.4641853	90.8	-0.4062919	90.8	-0.3822587	90.8	-0.4133246	90.8	-0.3885795	90.8	-0.3303767	90.8	-0.3384639	90.8	-0.2921943	90.8	-0.3584159	90.8	-0.3097334	90.8	-0.3259598	90.8	-0.3317192	90.8	-0.30007	90.8	-0.2934552	90.8	-0.2928984
91	-0.384232	91	-0.4499989	91	-0.3940657	91	-0.3751704	91	-0.4058612	91	-0.3791545	91	-0.318753	91	-0.3359215	91	-0.2901573	91	-0.3599876	91	-0.3099167	91	-0.3271173	91	-0.3287267	91	-0.3064629	91	-0.288956	91	-0.2921034
91.2	-0.3728925	91.2	-0.4488483	91.2	-0.3901701	91.2	-0.3663672	91.2	-0.390814	91.2	-0.3681362	91.2	-0.308658	91.2	-0.3360947	91.2	-0.2912288	91.2	-0.3554574	91.2	-0.3049919	91.2	-0.3227503	91.2	-0.3282921	91.2	-0.3005251	91.2	-0.2940328	91.2	-0.2897237
91.4	-0.3643033	91.4	-0.4365921	91.4	-0.3807021	91.4	-0.3574029	91.4	-0.3850524	91.4	-0.3595235	91.4	-0.2987585	91.4	-0.3364868	91.4	-0.2888931	91.4	-0.3536406	91.4	-0.3052187	91.4	-0.3213381	91.4	-0.3252604	91.4	-0.2995259	91.4	-0.2919852	91.4	-0.2917929
91.6	-0.3537405	91.6	-0.4284531	91.6	-0.3754588	91.6	-0.3448643	91.6	-0.3754425	91.6	-0.3485052	91.6	-0.2922171	91.6	-0.3375993	91.6	-0.2920864	91.6	-0.3540027	91.6	-0.3088974	91.6	-0.3265681	91.6	-0.3215197	91.6	-0.2998164	91.6	-0.2896811	91.6	-0.2931779
91.8	-0.3472566	91.8	-0.4175327	91.8	-0.3664085	91.8	-0.3406177	91.8	-0.3656672	91.8	-0.3385518	91.8	-0.2848322	91.8	-0.33485	91.8	-0.287328	91.8	-0.3550711	91.8	-0.3053965	91.8	-0.3201341	91.8	-0.3250548	91.8	-0.3020425	91.8	-0.2901231	91.8	-0.287027
92	-0.3358746	92	-0.4075458	92	-0.3486711	92	-0.3343118	92	-0.3580625	92	-0.3333971	92	-0.2701035	92	-0.3310929	92	-0.284997	92	-0.3532957	92	-0.310062	92	-0.320284	92	-0.3275319	92	-0.2976913	92	-0.2934641	92	-0.2921959
92.2	-0.3279327	92.2	-0.3960859	92.2	-0.3454642	92.2	-0.3121876	92.2	-0.3570155	92.2	-0.3242773	92.2	-0.2647341	92.2	-0.328511	92.2	-0.286805	92.2	-0.3524351	92.2	-0.3043747	92.2	-0.3221757	92.2	-0.3245484	92.2	-0.2959855	92.2	-0.2920072	92.2	-0.2864324
92.4	-0.3196841	92.4	-0.390838	92.4	-0.3308657	92.4	-0.3125605	92.4	-0.338117	92.4	-0.3162334	92.4	-0.2490739	92.4	-0.3335778	92.4	-0.2855124	92.4	-0.3498568	92.4	-0.3059236	92.4	-0.3233802	92.4	-0.3228103	92.4	-0.3013733	92.4	-0.2908006	92.4	-0.2907916
92.6	-0.3097316	92.6	-0.3745625	92.6	-0.3269708	92.6	-0.2978288	92.6	-0.3258664	92.6	-0.3094172	92.6	-0.2468769	92.6	-0.3335687	92.6	-0.2857528	92.6	-0.3514615	92.6	-0.3029867	92.6	-0.3183836	92.6	-0.3222904	92.6	-0.3017097	92.6	-0.2872168	92.6	-0.2889565
92.8	-0.2988386	92.8	-0.3676901	92.8	-0.3147239	92.8	-0.2933318	92.8	-0.3206455	92.8	-0.2943603	92.8	-0.2414469	92.8	-0.3342181	92.8	-0.287503	92.8	-0.3524195	92.8	-0.304755	92.8	-0.3198607	92.8	-0.3200127	92.8	-0.2971697	92.8	-0.2865879	92.8	-0.2895125
93	-0.2871882	93	-0.3625026	93	-0.3069096	93	-0.2808219	93	-0.312369	93	-0.291068	93	-0.221244	93	-0.3312294	93	-0.2833726	93	-0.3499012	93	-0.3032352	93	-0.3175074	93	-0.3214828	93	-0.2984931	93	-0.2848296	93	-0.2893574
93.2	-0.2784386	93.2	-0.3547067	93.2	-0.2983308	93.2	-0.2732261	93.2	-0.3052883	93.2	-0.2771488	93.2	-0.2210109	93.2	-0.3308338	93.2	-0.282847	93.2	-0.3508444	93.2	-0.3025905	93.2	-0.3222681	93.2	-0.323015	93.2	-0.3027241	93.2	-0.2868547	93.2	-0.2880675
93.4	-0.2763821	93.4	-0.3400621	93.4	-0.2913998	93.4	-0.2639255	93.4	-0.3000397	93.4	-0.2609826	93.4	-0.208537	93.4	-0.3324662	93.4	-0.2853866	93.4	-0.346868	93.4	-0.3005807	93.4	-0.3228641	93.4	-0.3215384	93.4	-0.2927412	93.4	-0.2864237	93.4	-0.2878747
93.6	-0.2627845	93.6	-0.3323433	93.6	-0.2774234	93.6	-0.2576685	93.6	-0.284672	93.6	-0.2580892	93.6	-0.1983965	93.6	-0.3300081	93.6	-0.284986	93.6	-0.3488331	93.6	-0.3040532	93.6	-0.3174399	93.6	-0.3182344	93.6	-0.297735	93.6	-0.2892276	93.6	-0.2900877
93.8	-0.2572695	93.8	-0.3239164	93.8	-0.2680174	93.8	-0.2448616	93.8	-0.2765404	93.8	-0.2537885	93.8	-0.1869558	93.8	-0.3303599	93.8	-0.2859429	93.8	-0.3494013	93.8	-0.3020096	93.8	-0.3144629	93.8	-0.3131861	93.8	-0.2938862	93.8	-0.2838474	93.8	-0.287624
94	-0.2442028	94	-0.31567	94	-0.2660155	94	-0.2344259	94	-0.2673894	94	-0.2407501	94	-0.1817526	94	-0.327206	94	-0.2816281	94	-0.3471802	94	-0.2955698	94	-0.3154851	94	-0.318053	94	-0.2971443	94	-0.290306	94	-0.2890608
94.2	-0.2373604	94.2	-0.3021078	94.2	-0.2527097	94.2	-0.2281659	94.2	-0.2573028	94.2	-0.2310817	94.2	-0.1726346	94.2	-0.3245456	94.2	-0.2841006	94.2	-0.3496602	94.2	-0.2992509	94.2	-0.3144657	94.2	-0.3196056	94.2	-0.2926999	94.2	-0.2872498	94.2	-0.2871938
94.4	-0.2281365	94.4	-0.2981793	94.4	-0.2462617	94.4	-0.2190227	94.4	-0.2472402	94.4	-0.2240489	94.4	-0.1622902	94.4	-0.3308583	94.4	-0.2841908	94.4	-0.3461851	94.4	-0.3026085	94.4	-0.3188043	94.4	-0.317141	94.4	-0.2889865	94.4	-0.2799456	94.4	-0.2886608
94.6	-0.2181819	94.6	-0.289986	94.6	-0.2357322	94.6	-0.2068826	94.6	-0.2408995	94.6	-0.2167021	94.6	-0.1521509	94.6	-0.3254256	94.6	-0.2816845	94.6	-0.3485385	94.6	-0.2980312	94.6	-0.3135517	94.6	-0.3194373	94.6	-0.2942095	94.6	-0.2843688	94.6	-0.2842417
94.8	-0.2090207	94.8	-0.2738035	94.8	-0.2293617	94.8	-0.2033788	94.8	-0.2324828	94.8	-0.2095582	94.8	-0.1450213	94.8	-0.3217358	94.8	-0.2798927	94.8	-0.3465	94.8	-0.2983255	94.8	-0.3164618	94.8	-0.3168067	94.8	-0.2932073	94.8	-0.2813453	94.8	-0.2841531
95	-0.2041905	95	-0.2679415	95	-0.2190379	95	-0.1925318	95	-0.2219661	95	-0.1965647	95	-0.1417303	95	-0.3221354	95	-0.2801104	95	-0.3457935	95	-0.2983567	95	-0.3103261	95	-0.3162642	95	-0.293727	95	-0.2848801	95	-0.2828192
95.2	-0.1951091	95.2	-0.2605884	95.2	-0.2116262	95.2	-0.1794389	95.2	-0.2172581	95.2	-0.1899182	95.2	-0.1273577	95.2	-0.3243162	95.2	-0.2813801	95.2	-0.3434056	95.2	-0.3019838	95.2	-0.3209881	95.2	-0.3141876	95.2	-0.2906915	95.2	-0.2858506	95.2	-0.2849306
95.4	-0.1858248	95.4	-0.2485086	95.4	-0.2013659	95.4	-0.1801336	95.4	-0.2051141	95.4	-0.1758325	95.4	-0.1224602	95.4	-0.3281468	95.4	-0.2741084	95.4	-0.3470913	95.4	-0.2982367	95.4	-0.3183134	95.4	-0.3161867	95.4	-0.2922304	95.4	-0.2839539	95.4	-0.2811095
95.6	-0.1750642	95.6	-0.2419335	95.6	-0.1938265	95.6	-0.1701492	95.6	-0.1970697	95.6	-0.1707827	95.6	-0.1084627	95.6	-0.3221827	95.6	-0.2757124	95.6	-0.3463736	95.6	-0.2941039	95.6	-0.3130145	95.6	-0.3205887	95.6	-0.2905491	95.6	-0.2804658	95.6	-0.2871544
95.8	-0.1684002	95.8	-0.2409256	95.8	-0.18433	95.8	-0.1563684	95.8	-0.1886809	95.8	-0.1649965	95.8	-0.09840926	95.8	-0.3247194	95.8	-0.2783718	95.8	-0.3461588	95.8	-0.2970335	95.8	-0.315161	95.8	-0.3186616	95.8	-0.289735	95.8	-0.279124	95.8	-0.2779832
96	-0.1597744	96	-0.2249409	96	-0.1765988	96	-0.1491668	96	-0.1818169	96	-0.1502199	96	-0.09596258	96	-0.3224616	96	-0.2760569	96	-0.3443631	96	-0.3014555	96	-0.3114063	96	-0.3121922	96	-0.2920258	96	-0.2801292	96	-0.2743927
96.2	-0.153994	96.2	-0.2201555	96.2	-0.1655742	96.2	-0.1385635	96.2	-0.1754593	96.2	-0.1469875	96.2	-0.08487433	96.2	-0.3262399	96.2	-0.278087	96.2	-0.3414425	96.2	-0.2971993	96.2	-0.310688	96.2	-0.3156826	96.2	-0.2924208	96.2	-0.2779707	96.2	-0.2772622
96.4	-0.1397726	96.4	-0.2043276	96.4	-0.1538176	96.4	-0.1331603	96.4	-0.1650147	96.4	-0.1355877	96.4	-0.07831723	96.4	-0.3210575	96.4	-0.2802708	96.4	-0.3417015	96.4	-0.2957582	96.4	-0.3146673	96.4	-0.3152915	96.4	-0.2938341	96.4	-0.2826473	96.4	-0.2813226
96.6	-0.1325785	96.6	-0.2014847	96.6	-0.1477516	96.6	-0.1244315	96.6	-0.1514731	96.6	-0.1300965	96.6	-0.06771758	96.6	-0.3227291	96.6	-0.2758673	96.6	-0.3444346	96.6	-0.2943026	96.6	-0.3137436	96.6	-0.3135849	96.6	-0.2886394	96.6	-0.2804179	96.6	-0.2806372
96.8	-0.1249171	96.8	-0.19384	96.8	-0.1412103	96.8	-0.1180771	96.8	-0.1458872	96.8	-0.11935	96.8	-0.05632007	96.8	-0.3249959	96.8	-0.2757269	96.8	-0.3482233	96.8	-0.2941419	96.8	-0.31186	96.8	-0.3135665	96.8	-0.2883022	96.8	-0.2798765	96.8	-0.2760761
97	-0.1154568	97	-0.1787164	97	-0.1322538	97	-0.1134991	97	-0.1421211	97	-0.1137191	97	-0.05660271	97	-0.3181208	97	-0.2753595	97	-0.3451778	97	-0.2950926	97	-0.3130887	97	-0.313302	97	-0.2864865	97	-0.2774594	97	-0.2773137
97.2	-0.1078699	97.2	-0.176944	97.2	-0.1267318	97.2	-0.1039554	97.2	-0.1312792	97.2	-0.1028562	97.2	-0.04669592	97.2	-0.320356	97.2	-0.2787427	97.2	-0.3411323	97.2	-0.2946918	97.2	-0.3095491	97.2	-0.3112033	97.2	-0.2911366	97.2	-0.2755077	97.2	-0.2783253
97.4	-0.1008541	97.4	-0.1654425	97.4	-0.1158698	97.4	-0.09033425	97.4	-0.1254478	97.4	-0.09553403	97.4	-0.03064981	97.4	-0.3194695	97.4	-0.2737677	97.4	-0.338053	97.4	-0.2898067	97.4	-0.3091851	97.4	-0.3157779	97.4	-0.2871784	97.4	-0.2790998	97.4	-0.2763904
97.6	-0.09152786	97.6	-0.1589224	97.6	-0.1077916	97.6	-0.08183116	97.6	-0.1160915	97.6	-0.08629466	97.6	-0.02886401	97.6	-0.3197594	97.6	-0.2730334	97.6	-0.3423161	97.6	-0.2927835	97.6	-0.3130621	97.6	-0.3100098	97.6	-0.2829855	97.6	-0.2756781	97.6	-0.2767985
97.8	-0.08687955	97.8	-0.146611	97.8	-0.09766397	97.8	-0.0752553	97.8	-0.1161134	97.8	-0.07337128	97.8	-0.01864924	97.8	-0.3182124	97.8	-0.2731294	97.8	-0.3429762	97.8	-0.2991603	97.8	-0.3048145	97.8	-0.3146593	97.8	-0.2832783	97.8	-0.2778517	97.8	-0.275975
98	-0.08084375	98	-0.1397637	98	-0.09131778	98	-0.06746667	98	-0.09819637	98	-0.07201293	98	-0.00703005	98	-0.3195315	98	-0.2721949	98	-0.3366232	98	-0.2958222	98	-0.3102147	98	-0.3065401	98	-0.2833991	98	-0.2769851	98	-0.2746871
98.2	-0.06934084	98.2	-0.1317717	98.2	-0.08644456	98.2	-0.06033931	98.2	-0.09236437	98.2	-0.06702687	98.2	-0.00091246	98.2	-0.3116558	98.2	-0.2713118	98.2	-0.3431466	98.2	-0.2919536	98.2	-0.3090732	98.2	-0.3140202	98.2	-0.2842908	98.2	-0.2760004	98.2	-0.2783687
98.4	-0.06157595	98.4	-0.1239273	98.4	-0.08208059	98.4	-0.049476	98.4	-0.08659695	98.4	-0.05851324	98.4	0.00713473	98.4	-0.3171021	98.4	-0.2728619	98.4	-0.3340209	98.4	-0.2914028	98.4	-0.3123316	98.4	-0.3083529	98.4	-0.2880983	98.4	-0.2769105	98.4	-0.2769873
98.6	-0.0550602	98.6	-0.1197882	98.6	-0.06730713	98.6	-0.05077067	98.6	-0.08000719	98.6	-0.04587634	98.6	0.01436217	98.6	-0.3173366	98.6	-0.2702405	98.6	-0.3380818	98.6	-0.290197	98.6	-0.3047703	98.6	-0.3058215	98.6	-0.2877033	98.6	-0.2762574	98.6	-0.2781664
98.8	-0.04333685	98.8	-0.10546	98.8	-0.06129821	98.8	-0.03766073	98.8	-0.06455265	98.8	-0.04345576	98.8	0.02363986	98.8	-0.314119	98.8	-0.2690004	98.8	-0.336833	98.8	-0.2955645	98.8	-0.3076594	98.8	-0.306765	98.8	-0.2859924	98.8	-0.2776652	98.8	-0.2753713
99	-0.03965653	99	-0.1031192	99	-0.05155659	99	-0.02735905	99	-0.05937944	99	-0.02604617	99	0.02679693	99	-0.3121733	99	-0.2728121	99	-0.3377278	99	-0.2878216	99	-0.3069775	99	-0.3085234	99	-0.2747997	99	-0.2729451	99	-0.2737117
99.2	-0.02996521	99.2	-0.09008703	99.2	-0.04395236	99.2	-0.02445024	99.2	-0.05077184	99.2	-0.02553142	99.2	0.04029058	99.2	-0.3138832	99.2	-0.2732634	99.2	-0.3392164	99.2	-0.2906202	99.2	-0.3046198	99.2	-0.3081931	99.2	-0.2821065	99.2	-0.271379	99.2	-0.2709732
99.4	-0.02342106	99.4	-0.08425323	99.4	-0.03635496	99.4	-0.01302119	99.4	-0.04911628	99.4	-0.01551907	99.4	0.04540543	99.4	-0.3129511	99.4	-0.2715434	99.4	-0.3364875	99.4	-0.2915779	99.4	-0.3065981	99.4	-0.3073607	99.4	-0.282498	99.4	-0.2721845	99.4	-0.2707423
99.6	-0.01149226	99.6	-0.07855991	99.6	-0.03022406	99.6	-0.0045711	99.6	-0.03498479	99.6	-0.01116297	99.6	0.05184518	99.6	-0.3163603	99.6	-0.2702893	99.6	-0.3374244	99.6	-0.2925241	99.6	-0.3040318	99.6	-0.3075397	99.6	-0.2852264	99.6	-0.2725623	99.6	-0.2733504
99.8	-0.00823834	99.8	-0.06749117	99.8	-0.02472565	99.8	-0.00115012	99.8	-0.03081017	99.8	0.00082522	99.8	0.06009838	99.8	-0.3160241	99.8	-0.2688279	99.8	-0.3350464	99.8	-0.2921408	99.8	-0.3029254	99.8	-0.3052827	99.8	-0.2788548	99.8	-0.2713044	99.8	-0.2736254
100	-0.00202607	100	-0.06570259	100	-0.01419576	100	0.00858981	100	-0.02508902	100	0.00610735	100	0.0669659	100	-0.3123274	100	-0.2706747	100	-0.3329548	100	-0.2907631	100	-0.3039335	100	-0.3011228	100	-0.2798839	100	-0.2728063	100	-0.2721032
100.2	0.00803043	100.2	-0.06066282	100.2	-0.00383532	100.2	0.01765735	100.2	-0.01830359	100.2	0.01103929	100.2	0.07565609	100.2	-0.3098204	100.2	-0.2687798	100.2	-0.3348698	100.2	-0.2860319	100.2	-0.3094071	100.2	-0.3025898	100.2	-0.2840027	100.2	-0.2735333	100.2	-0.2720949
100.4	0.01043763	100.4	-0.04710774	100.4	-0.00289515	100.4	0.02510703	100.4	-0.00745196	100.4	0.01633318	100.4	0.08006831	100.4	-0.3141261	100.4	-0.2668092	100.4	-0.3332693	100.4	-0.2875009	100.4	-0.3069547	100.4	-0.3014059	100.4	-0.2782334	100.4	-0.2712933	100.4	-0.2755495
100.6	0.02285445	100.6	-0.04126384	100.6	0.00550437	100.6	0.02851856	100.6	-0.00043515	100.6	0.02806244	100.6	0.09351836	100.6	-0.3124242	100.6	-0.2681432	100.6	-0.3324764	100.6	-0.2896763	100.6	-0.3045897	100.6	-0.304613	100.6	-0.2798394	100.6	-0.26999	100.6	-0.2711538
100.8	0.02711855	100.8	-0.03189445	100.8	0.01311323	100.8	0.04330052	100.8	0.0013916	100.8	0.03651549	100.8	0.09960219	100.8	-0.3129116	100.8	-0.2669523	100.8	-0.3360541	100.8	-0.2848966	100.8	-0.3009391	100.8	-0.3001031	100.8	-0.2755548	100.8	-0.2678996	100.8	-0.2711258
101	0.03804087	101	-0.03155534	101	0.02176744	101	0.0470911	101	0.00968153	101	0.03937541	101	0.1058669	101	-0.3110931	101	-0.2637275	101	-0.3303431	101	-0.2863049	101	-0.3002836	101	-0.3015535	101	-0.2776197	101	-0.2708694	101	-0.2710968
101.2	0.04613192	101.2	-0.01879665	101.2	0.02399543	101.2	0.0488929	101.2	0.02240443	101.2	0.04553319	101.2	0.1116731	101.2	-0.3093656	101.2	-0.2680802	101.2	-0.3348601	101.2	-0.2856862	101.2	-0.3022057	101.2	-0.3016977	101.2	-0.2799917	101.2	-0.2646264	101.2	-0.2716278
101.4	0.05172344	101.4	-0.01174141	101.4	0.03291525	101.4	0.05778731	101.4	0.02525256	101.4	0.05476025	101.4	0.1219219	101.4	-0.3113132	101.4	-0.2660419	101.4	-0.3324808	101.4	-0.2878393	101.4	-0.3007914	101.4	-0.3010122	101.4	-0.2766829	101.4	-0.2706673	101.4	-0.2685846
101.6	0.05939843	101.6	-0.00703222	101.6	0.03998268	101.6	0.06837288	101.6	0.03262822	101.6	0.06267414	101.6	0.1270739	101.6	-0.3075749	101.6	-0.2694477	101.6	-0.3330657	101.6	-0.2898229	101.6	-0.2999499	101.6	-0.3053405	101.6	-0.2846601	101.6	-0.2689322	101.6	-0.273672
101.8	0.06498981	101.8	0.00320188	101.8	0.04624269	101.8	0.0747328	101.8	0.03577178	101.8	0.06972059	101.8	0.1363223	101.8	-0.3083186	101.8	-0.2650376	101.8	-0.335145	101.8	-0.2864411	101.8	-0.3020646	101.8	-0.3009623	101.8	-0.2768441	101.8	-0.2674367	101.8	-0.2681068
102	0.06989345	102	0.00540367	102	0.05469744	102	0.08216483	102	0.04523727	102	0.08035871	102	0.1397951	102	-0.311664	102	-0.2643228	102	-0.3324755	102	-0.2824574	102	-0.3003525	102	-0.3018482	102	-0.2768241	102	-0.2708482	102	-0.2696787
102.2	0.08008747	102.2	0.01437639	102.2	0.06255689	102.2	0.08675113	102.2	0.05998141	102.2	0.08007258	102.2	0.147603	102.2	-0.3050998	102.2	-0.26226	102.2	-0.3327816	102.2	-0.2863105	102.2	-0.2993452	102.2	-0.3016612	102.2	-0.2769202	102.2	-0.2649875	102.2	-0.2719532
102.4	0.0857617	102.4	0.02408909	102.4	0.07129553	102.4	0.09717145	102.4	0.0570314	102.4	0.09104256	102.4	0.1569194	102.4	-0.308705	102.4	-0.269687	102.4	-0.3280165	102.4	-0.2840104	102.4	-0.3016793	102.4	-0.2992243	102.4	-0.2773791	102.4	-0.2666632	102.4	-0.2676239
102.6	0.08962395	102.6	0.02973414	102.6	0.07572054	102.6	0.1010491	102.6	0.06397746	102.6	0.09805319	102.6	0.1590373	102.6	-0.3089882	102.6	-0.2706581	102.6	-0.3296857	102.6	-0.2837775	102.6	-0.2983939	102.6	-0.2966557	102.6	-0.2772642	102.6	-0.2660752	102.6	-0.2628864
102.8	0.09740588	102.8	0.03708788	102.8	0.08299134	102.8	0.1068349	102.8	0.07343388	102.8	0.1112862	102.8	0.1692447	102.8	-0.3098091	102.8	-0.268714	102.8	-0.3276327	102.8	-0.2819982	102.8	-0.2996636	102.8	-0.3034272	102.8	-0.2731147	102.8	-0.2673772	102.8	-0.2697132
103	0.1080933	103	0.04217961	103	0.08733483	103	0.1142744	103	0.07851455	103	0.1101127	103	0.1743125	103	-0.3069158	103	-0.2619144	103	-0.3271299	103	-0.2839757	103	-0.2993064	103	-0.2977298	103	-0.274884	103	-0.2661532	103	-0.267851
103.2	0.1153847	103.2	0.0519626	103.2	0.09383935	103.2	0.1206256	103.2	0.08944176	103.2	0.1162317	103.2	0.181467	103.2	-0.3085226	103.2	-0.2625607	103.2	-0.3295033	103.2	-0.2846708	103.2	-0.2987347	103.2	-0.2984687	103.2	-0.276971	103.2	-0.2662366	103.2	-0.2694009
103.4	0.1201602	103.4	0.05809522	103.4	0.1058284	103.4	0.125337	103.4	0.08789871	103.4	0.1252911	103.4	0.1870513	103.4	-0.2965901	103.4	-0.2646079	103.4	-0.325435	103.4	-0.2821763	103.4	-0.3020474	103.4	-0.2992883	103.4	-0.2737929	103.4	-0.2641462	103.4	-0.2672743
103.6	0.1214789	103.6	0.06488746	103.6	0.1056295	103.6	0.1332125	103.6	0.09780599	103.6	0.1332078	103.6	0.1946652	103.6	-0.303541	103.6	-0.2620067	103.6	-0.3343758	103.6	-0.2831489	103.6	-0.2976314	103.6	-0.297849	103.6	-0.2774548	103.6	-0.2630943	103.6	-0.2663363
103.8	0.1349513	103.8	0.07117097	103.8	0.1135056	103.8	0.1336395	103.8	0.1037831	103.8	0.1329493	103.8	0.1985885	103.8	-0.3065018	103.8	-0.2605794	103.8	-0.3272762	103.8	-0.2827407	103.8	-0.2947758	103.8	-0.2968453	103.8	-0.272962	103.8	-0.2650886	103.8	-0.264275
104	0.1363565	104	0.07511296	104	0.1190922	104	0.1483776	104	0.1172189	104	0.1428906	104	0.2056558	104	-0.3002422	104	-0.2640831	104	-0.3280847	104	-0.2819473	104	-0.2937013	104	-0.297608	104	-0.2740466	104	-0.2634352	104	-0.2689604
104.2	0.1448666	104.2	0.08387846	104.2	0.126022	104.2	0.1535097	104.2	0.1181614	104.2	0.1524468	104.2	0.2169275	104.2	-0.3073183	104.2	-0.2642395	104.2	-0.3256379	104.2	-0.2760033	104.2	-0.2966157	104.2	-0.2936812	104.2	-0.2778894	104.2	-0.2605644	104.2	-0.2693148
104.4	0.1473976	104.4	0.08426804	104.4	0.1370945	104.4	0.1593035	104.4	0.1233239	104.4	0.1584561	104.4	0.2200369	104.4	-0.3062553	104.4	-0.2600595	104.4	-0.3246746	104.4	-0.2782729	104.4	-0.2945642	104.4	-0.296597	104.4	-0.2754086	104.4	-0.263227	104.4	-0.2643653
104.6	0.1579367	104.6	0.09609946	104.6	0.1400318	104.6	0.1669593	104.6	0.127826	104.6	0.1600401	104.6	0.2279667	104.6	-0.3016188	104.6	-0.2585878	104.6	-0.322816	104.6	-0.2775798	104.6	-0.2915386	104.6	-0.2912513	104.6	-0.2704379	104.6	-0.2620003	104.6	-0.2656163
104.8	0.161533	104.8	0.1033711	104.8	0.1437283	104.8	0.1684012	104.8	0.1382149	104.8	0.1692113	104.8	0.2314511	104.8	-0.3002481	104.8	-0.2621652	104.8	-0.3239257	104.8	-0.2768815	104.8	-0.291947	104.8	-0.300815	104.8	-0.2744741	104.8	-0.2597367	104.8	-0.2649267
105	0.1688109	105	0.1052216	105	0.1477877	105	0.1787025	105	0.1360733	105	0.1730715	105	0.2352243	105	-0.2993421	105	-0.2636128	105	-0.323304	105	-0.2765737	105	-0.2931835	105	-0.2898805	105	-0.2688256	105	-0.2618639	105	-0.2605714
105.2	0.176954	105.2	0.1160637	105.2	0.1582282	105.2	0.1882406	105.2	0.1462094	105.2	0.1819986	105.2	0.2458634	105.2	-0.2982052	105.2	-0.2616175	105.2	-0.3247253	105.2	-0.2764786	105.2	-0.287847	105.2	-0.2974746	105.2	-0.2687963	105.2	-0.2619591	105.2	-0.2627986
105.4	0.1783217	105.4	0.1198188	105.4	0.165563	105.4	0.1893908	105.4	0.1564991	105.4	0.1870285	105.4	0.2525721	105.4	-0.3006652	105.4	-0.259418	105.4	-0.3273836	105.4	-0.2746194	105.4	-0.2972	105.4	-0.2942265	105.4	-0.2675004	105.4	-0.2588816	105.4	-0.2616499
105.6	0.1809112	105.6	0.1243661	105.6	0.1663917	105.6	0.1958927	105.6	0.1605975	105.6	0.1891859	105.6	0.2527497	105.6	-0.3024788	105.6	-0.2619514	105.6	-0.3251809	105.6	-0.2812203	105.6	-0.2959194	105.6	-0.2976921	105.6	-0.2713373	105.6	-0.2628933	105.6	-0.2649829
105.8	0.1879954	105.8	0.129895	105.8	0.1743617	105.8	0.2006278	105.8	0.1629638	105.8	0.2010016	105.8	0.2638618	105.8	-0.3009494	105.8	-0.2570747	105.8	-0.321933	105.8	-0.2728535	105.8	-0.2927767	105.8	-0.2934672	105.8	-0.26782	105.8	-0.254999	105.8	-0.2642021
106	0.1970543	106	0.1397701	106	0.1805352	106	0.2104507	106	0.1705639	106	0.2042762	106	0.2683584	106	-0.3015588	106	-0.2580251	106	-0.3258413	106	-0.2789744	106	-0.2984835	106	-0.2902356	106	-0.2693613	106	-0.2578713	106	-0.261164
106.2	0.1998696	106.2	0.1454798	106.2	0.1841054	106.2	0.2126293	106.2	0.1729259	106.2	0.2056663	106.2	0.274644	106.2	-0.3005573	106.2	-0.2571878	106.2	-0.3212592	106.2	-0.2717687	106.2	-0.2935102	106.2	-0.2879393	106.2	-0.2667519	106.2	-0.2573394	106.2	-0.2622102
106.4	0.2072876	106.4	0.1474371	106.4	0.1947886	106.4	0.2211284	106.4	0.1839169	106.4	0.2181362	106.4	0.2833891	106.4	-0.2975854	106.4	-0.2562797	106.4	-0.3175551	106.4	-0.2787313	106.4	-0.288137	106.4	-0.2911836	106.4	-0.2701769	106.4	-0.2584366	106.4	-0.2596512
106.6	0.2153172	106.6	0.1553702	106.6	0.1980919	106.6	0.2298438	106.6	0.1832768	106.6	0.2264435	106.6	0.2878892	106.6	-0.2994408	106.6	-0.2522331	106.6	-0.3198416	106.6	-0.2708404	106.6	-0.2884335	106.6	-0.2909669	106.6	-0.2646632	106.6	-0.2591833	106.6	-0.2632746
106.8	0.2204101	106.8	0.1587904	106.8	0.201844	106.8	0.230173	106.8	0.1918202	106.8	0.2347304	106.8	0.2916242	106.8	-0.2965854	106.8	-0.2558195	106.8	-0.3213107	106.8	-0.2728855	106.8	-0.2933215	106.8	-0.2917406	106.8	-0.2666703	106.8	-0.2609378	106.8	-0.2598891
107	0.2259955	107	0.1635318	107	0.2066494	107	0.235645	107	0.1999459	107	0.2320942	107	0.2970838	107	-0.2971732	107	-0.257699	107	-0.318339	107	-0.2739289	107	-0.292204	107	-0.2944786	107	-0.2676044	107	-0.2604129	107	-0.2610817
107.2	0.2277915	107.2	0.1708398	107.2	0.2148076	107.2	0.2425377	107.2	0.20534	107.2	0.2392161	107.2	0.301118	107.2	-0.2963355	107.2	-0.2555565	107.2	-0.3208225	107.2	-0.2770847	107.2	-0.2898808	107.2	-0.2902699	107.2	-0.268144	107.2	-0.2565015	107.2	-0.2653543
107.4	0.2318541	107.4	0.1756828	107.4	0.2225064	107.4	0.2444286	107.4	0.2049838	107.4	0.2407003	107.4	0.3081669	107.4	-0.29829	107.4	-0.2512287	107.4	-0.3238554	107.4	-0.2751862	107.4	-0.2905341	107.4	-0.288277	107.4	-0.2720965	107.4	-0.2603896	107.4	-0.2559491
107.6	0.2451265	107.6	0.1837731	107.6	0.2260042	107.6	0.2545099	107.6	0.2120546	107.6	0.2481688	107.6	0.312753	107.6	-0.2989894	107.6	-0.2525143	107.6	-0.3213247	107.6	-0.2727619	107.6	-0.2922912	107.6	-0.2901784	107.6	-0.2650902	107.6	-0.2589836	107.6	-0.2585485
107.8	0.2498862	107.8	0.1902827	107.8	0.2314204	107.8	0.2591465	107.8	0.2199056	107.8	0.2520733	107.8	0.3188367	107.8	-0.2966777	107.8	-0.2565457	107.8	-0.3205338	107.8	-0.2692856	107.8	-0.2873991	107.8	-0.2895033	107.8	-0.2665985	107.8	-0.2543512	107.8	-0.2592748
108	0.2507614	108	0.194031	108	0.2362517	108	0.2635884	108	0.2223345	108	0.2596412	108	0.3264427	108	-0.2978565	108	-0.2531357	108	-0.3201669	108	-0.2713716	108	-0.2855997	108	-0.2864978	108	-0.2712979	108	-0.2566695	108	-0.2606995
108.2	0.2549444	108.2	0.1975938	108.2	0.2390536	108.2	0.2684562	108.2	0.2312356	108.2	0.2632858	108.2	0.3313999	108.2	-0.292631	108.2	-0.2496379	108.2	-0.326765	108.2	-0.2709949	108.2	-0.287649	108.2	-0.2876173	108.2	-0.2657812	108.2	-0.2542577	108.2	-0.2547078
108.4	0.2638978	108.4	0.1998286	108.4	0.2477522	108.4	0.2703632	108.4	0.2364279	108.4	0.2713656	108.4	0.3292753	108.4	-0.2945	108.4	-0.2542752	108.4	-0.3184271	108.4	-0.2694858	108.4	-0.2880452	108.4	-0.2901385	108.4	-0.268186	108.4	-0.2556694	108.4	-0.2573455
108.6	0.2660559	108.6	0.2122605	108.6	0.2513814	108.6	0.277171	108.6	0.2402573	108.6	0.2762334	108.6	0.344486	108.6	-0.2948462	108.6	-0.2510596	108.6	-0.32231	108.6	-0.2676032	108.6	-0.2862835	108.6	-0.2899128	108.6	-0.2653615	108.6	-0.258873	108.6	-0.2534878
108.8	0.2730277	108.8	0.218058	108.8	0.2620851	108.8	0.2873069	108.8	0.2450088	108.8	0.2812534	108.8	0.3430261	108.8	-0.2927133	108.8	-0.2528458	108.8	-0.3156169	108.8	-0.269786	108.8	-0.28936	108.8	-0.2900186	108.8	-0.2634485	108.8	-0.2571593	108.8	-0.2572279
109	0.2746133	109	0.2221948	109	0.2614649	109	0.2867517	109	0.2524304	109	0.2849185	109	0.3519676	109	-0.2956525	109	-0.252626	109	-0.3200678	109	-0.2736089	109	-0.2833787	109	-0.2829638	109	-0.2647045	109	-0.2519038	109	-0.258088
109.2	0.2811324	109.2	0.2235399	109.2	0.2655133	109.2	0.290516	109.2	0.2513493	109.2	0.2910861	109.2	0.3517336	109.2	-0.2921871	109.2	-0.2515486	109.2	-0.3150965	109.2	-0.2741832	109.2	-0.2891859	109.2	-0.2895059	109.2	-0.2626825	109.2	-0.2581167	109.2	-0.2551575
109.4	0.28995	109.4	0.2263115	109.4	0.2713546	109.4	0.2955715	109.4	0.2596826	109.4	0.2901309	109.4	0.3660508	109.4	-0.2978908	109.4	-0.251652	109.4	-0.3175235	109.4	-0.2665008	109.4	-0.2866033	109.4	-0.2867243	109.4	-0.264373	109.4	-0.2529251	109.4	-0.2572335
109.6	0.2951513	109.6	0.2323983	109.6	0.2752174	109.6	0.3041471	109.6	0.2649083	109.6	0.2991661	109.6	0.3661418	109.6	-0.2901641	109.6	-0.2496855	109.6	-0.3160954	109.6	-0.2689543	109.6	-0.2836297	109.6	-0.2846861	109.6	-0.2684156	109.6	-0.2512043	109.6	-0.2534845
109.8	0.2946643	109.8	0.2354639	109.8	0.2799018	109.8	0.3031757	109.8	0.2664272	109.8	0.308521	109.8	0.3663669	109.8	-0.2934897	109.8	-0.2513507	109.8	-0.3168313	109.8	-0.2682463	109.8	-0.2812562	109.8	-0.2885145	109.8	-0.2625571	109.8	-0.2536734	109.8	-0.255134
110	0.2983558	110	0.2376929	110	0.2802812	110	0.3199698	110	0.2749941	110	0.3079949	110	0.3730567	110	-0.2903112	110	-0.2492689	110	-0.3153921	110	-0.2714446	110	-0.2864522	110	-0.2860844	110	-0.2633092	110	-0.2525672	110	-0.256186
110.2	0.307109	110.2	0.2539754	110.2	0.2896188	110.2	0.3230817	110.2	0.2839173	110.2	0.3149415	110.2	0.3789932	110.2	-0.289915	110.2	-0.247035	110.2	-0.314884	110.2	-0.2649366	110.2	-0.2904623	110.2	-0.2899899	110.2	-0.2625934	110.2	-0.2541083	110.2	-0.2516058
110.4	0.3141703	110.4	0.2478911	110.4	0.2976092	110.4	0.3250019	110.4	0.2884168	110.4	0.322424	110.4	0.3892123	110.4	-0.2926808	110.4	-0.2466993	110.4	-0.3182904	110.4	-0.2679756	110.4	-0.285678	110.4	-0.2801797	110.4	-0.2628205	110.4	-0.2543038	110.4	-0.259552
110.6	0.3139498	110.6	0.258538	110.6	0.2971039	110.6	0.3262409	110.6	0.2919867	110.6	0.3231912	110.6	0.3908593	110.6	-0.2950714	110.6	-0.2500969	110.6	-0.321025	110.6	-0.2693022	110.6	-0.2868558	110.6	-0.2855934	110.6	-0.2589044	110.6	-0.2488837	110.6	-0.2529717
110.8	0.3208492	110.8	0.2627722	110.8	0.3043929	110.8	0.3337002	110.8	0.2925795	110.8	0.3304802	110.8	0.3936049	110.8	-0.2901988	110.8	-0.2458102	110.8	-0.3125437	110.8	-0.2655382	110.8	-0.283528	110.8	-0.290851	110.8	-0.2612873	110.8	-0.2468697	110.8	-0.2541277
111	0.3264083	111	0.2711653	111	0.3094929	111	0.3389169	111	0.3004904	111	0.3348113	111	0.397798	111	-0.289857	111	-0.2501213	111	-0.3143033	111	-0.2675085	111	-0.2815334	111	-0.2820807	111	-0.2624819	111	-0.2553693	111	-0.2546083
111.2	0.328388	111.2	0.2725903	111.2	0.3134755	111.2	0.3427297	111.2	0.302585	111.2	0.3378502	111.2	0.3977951	111.2	-0.28901	111.2	-0.2468114	111.2	-0.3097686	111.2	-0.2701756	111.2	-0.2861352	111.2	-0.2848548	111.2	-0.2645451	111.2	-0.252764	111.2	-0.2509235
111.4	0.3301624	111.4	0.2795806	111.4	0.3174013	111.4	0.3427553	111.4	0.3056543	111.4	0.3409397	111.4	0.4131248	111.4	-0.295261	111.4	-0.2439796	111.4	-0.3122416	111.4	-0.2676153	111.4	-0.2782895	111.4	-0.2765385	111.4	-0.2618978	111.4	-0.2497545	111.4	-0.2547212
111.6	0.3443842	111.6	0.2800819	111.6	0.3233229	111.6	0.3510047	111.6	0.3107577	111.6	0.3460913	111.6	0.4125946	111.6	-0.2873401	111.6	-0.2453013	111.6	-0.3106475	111.6	-0.265469	111.6	-0.284391	111.6	-0.2823668	111.6	-0.2611986	111.6	-0.2503042	111.6	-0.2516775
111.8	0.3433962	111.8	0.2858653	111.8	0.3267917	111.8	0.358719	111.8	0.319778	111.8	0.3521411	111.8	0.4184283	111.8	-0.2897516	111.8	-0.2453723	111.8	-0.3112093	111.8	-0.2636112	111.8	-0.2827238	111.8	-0.2845758	111.8	-0.2594959	111.8	-0.2551529	111.8	-0.2521212
112	0.3460964	112	0.2891802	112	0.3318799	112	0.3561707	112	0.3220972	112	0.3539236	112	0.421715	112	-0.2852798	112	-0.2519341	112	-0.3128994	112	-0.2713668	112	-0.2805119	112	-0.2825703	112	-0.2610307	112	-0.2519139	112	-0.249364
112.2	0.350043	112.2	0.2961042	112.2	0.3369006	112.2	0.363953	112.2	0.3262004	112.2	0.3616195	112.2	0.4293059	112.2	-0.2882963	112.2	-0.2481316	112.2	-0.3107518	112.2	-0.2627632	112.2	-0.2824237	112.2	-0.2866864	112.2	-0.2588992	112.2	-0.2505946	112.2	-0.2550662
112.4	0.3539332	112.4	0.2979529	112.4	0.3391047	112.4	0.3714646	112.4	0.3293236	112.4	0.3614744	112.4	0.4312559	112.4	-0.2865101	112.4	-0.2475179	112.4	-0.3126589	112.4	-0.2629478	112.4	-0.2811906	112.4	-0.2821719	112.4	-0.2590339	112.4	-0.2426897	112.4	-0.2504518
112.6	0.3607344	112.6	0.30378	112.6	0.3476157	112.6	0.3735581	112.6	0.329237	112.6	0.3688799	112.6	0.4349653	112.6	-0.2903392	112.6	-0.246748	112.6	-0.3143799	112.6	-0.2638705	112.6	-0.28231	112.6	-0.2800507	112.6	-0.2577338	112.6	-0.2523505	112.6	-0.2472838
112.8	0.3602479	112.8	0.3099401	112.8	0.3439689	112.8	0.3815026	112.8	0.3405431	112.8	0.3745978	112.8	0.4425379	112.8	-0.2879403	112.8	-0.2513013	112.8	-0.3118219	112.8	-0.2692492	112.8	-0.2829349	112.8	-0.2759875	112.8	-0.2600041	112.8	-0.2471571	112.8	-0.2535103
113	0.368137	113	0.3109717	113	0.3556884	113	0.380054	113	0.3444252	113	0.3806939	113	0.4435303	113	-0.2867987	113	-0.2421842	113	-0.3099559	113	-0.2595031	113	-0.2825935	113	-0.2794016	113	-0.2581373	113	-0.2468967	113	-0.2465994
113.2	0.3700117	113.2	0.319736	113.2	0.3574855	113.2	0.3841625	113.2	0.3493849	113.2	0.3862879	113.2	0.4492195	113.2	-0.2902047	113.2	-0.2514117	113.2	-0.3127932	113.2	-0.26682	113.2	-0.2780133	113.2	-0.2811829	113.2	-0.2573921	113.2	-0.2523441	113.2	-0.2482975
113.4	0.3804324	113.4	0.321247	113.4	0.3629893	113.4	0.3928311	113.4	0.3475286	113.4	0.3867361	113.4	0.4482045	113.4	-0.2894122	113.4	-0.2453949	113.4	-0.3093429	113.4	-0.2633936	113.4	-0.2811727	113.4	-0.2797049	113.4	-0.2563885	113.4	-0.2476577	113.4	-0.254541
113.6	0.385743	113.6	0.3231639	113.6	0.3671159	113.6	0.3957187	113.6	0.3517908	113.6	0.3900647	113.6	0.4549403	113.6	-0.2888121	113.6	-0.2480094	113.6	-0.3100004	113.6	-0.2630127	113.6	-0.2792652	113.6	-0.2773772	113.6	-0.2573325	113.6	-0.2417157	113.6	-0.2469371
113.8	0.3865443	113.8	0.3252964	113.8	0.368999	113.8	0.3946073	113.8	0.3641433	113.8	0.3953378	113.8	0.461022	113.8	-0.284593	113.8	-0.2410538	113.8	-0.3157342	113.8	-0.2633441	113.8	-0.2839894	113.8	-0.2797321	113.8	-0.254312	113.8	-0.2430671	113.8	-0.2472373
114	0.3910828	114	0.3365101	114	0.3731311	114	0.3993792	114	0.3606898	114	0.3994464	114	0.4688182	114	-0.2815741	114	-0.2429194	114	-0.3095504	114	-0.2594342	114	-0.2786275	114	-0.2722789	114	-0.2586713	114	-0.2459872	114	-0.2517012
114.2	0.3927414	114.2	0.3336937	114.2	0.3783997	114.2	0.4039589	114.2	0.3679773	114.2	0.4061057	114.2	0.4742269	114.2	-0.2857409	114.2	-0.2438142	114.2	-0.3111207	114.2	-0.2587281	114.2	-0.2840315	114.2	-0.2755397	114.2	-0.2616251	114.2	-0.2474349	114.2	-0.2527429
114.4	0.396152	114.4	0.3416585	114.4	0.3789944	114.4	0.4096474	114.4	0.3693351	114.4	0.4091481	114.4	0.4704824	114.4	-0.2852164	114.4	-0.2412958	114.4	-0.3079934	114.4	-0.2608375	114.4	-0.2786323	114.4	-0.2767627	114.4	-0.2531334	114.4	-0.2451996	114.4	-0.2528998
114.6	0.4012744	114.6	0.34452	114.6	0.3877273	114.6	0.4180271	114.6	0.3726869	114.6	0.4146615	114.6	0.4785005	114.6	-0.2866237	114.6	-0.2392748	114.6	-0.3071217	114.6	-0.2641934	114.6	-0.2773091	114.6	-0.2792546	114.6	-0.255369	114.6	-0.2460671	114.6	-0.2476348
114.8	0.4046754	114.8	0.3540087	114.8	0.3927982	114.8	0.4177904	114.8	0.3790857	114.8	0.4144894	114.8	0.481401	114.8	-0.2888072	114.8	-0.2403387	114.8	-0.3037433	114.8	-0.2596077	114.8	-0.2818635	114.8	-0.2748997	114.8	-0.2537315	114.8	-0.241453	114.8	-0.240251
115	0.4084434	115	0.3535428	115	0.3981491	115	0.4157147	115	0.3820637	115	0.4115747	115	0.4843325	115	-0.2838828	115	-0.2435745	115	-0.3086479	115	-0.2619698	115	-0.2816738	115	-0.2751501	115	-0.2545373	115	-0.2435423	115	-0.2495321
115.2	0.4155657	115.2	0.3626201	115.2	0.3974443	115.2	0.4262193	115.2	0.3890543	115.2	0.4241335	115.2	0.4919485	115.2	-0.2864169	115.2	-0.2447834	115.2	-0.304148	115.2	-0.2645696	115.2	-0.2800394	115.2	-0.2768448	115.2	-0.2544804	115.2	-0.2449914	115.2	-0.2437967
115.4	0.4171263	115.4	0.3619046	115.4	0.4011055	115.4	0.4307697	115.4	0.3931593	115.4	0.4296654	115.4	0.4927988	115.4	-0.2808723	115.4	-0.2409394	115.4	-0.3097261	115.4	-0.2585059	115.4	-0.2793525	115.4	-0.2757332	115.4	-0.2521187	115.4	-0.2458781	115.4	-0.2444771
115.6	0.4201498	115.6	0.3671606	115.6	0.4055736	115.6	0.4345917	115.6	0.3982815	115.6	0.4306742	115.6	0.4993089	115.6	-0.2843846	115.6	-0.2410065	115.6	-0.3055043	115.6	-0.2608609	115.6	-0.2796909	115.6	-0.2754992	115.6	-0.2557864	115.6	-0.2440566	115.6	-0.2481775
115.8	0.4258113	115.8	0.367962	115.8	0.4082008	115.8	0.4393657	115.8	0.3969601	115.8	0.4335177	115.8	0.4993024	115.8	-0.2797067	115.8	-0.2418578	115.8	-0.3056417	115.8	-0.2555659	115.8	-0.2725399	115.8	-0.2753468	115.8	-0.2528007	115.8	-0.2437052	115.8	-0.2428665
116	0.4213116	116	0.3701995	116	0.410861	116	0.444292	116	0.401993	116	0.4413558	116	0.5013978	116	-0.2810341	116	-0.2416648	116	-0.3067463	116	-0.2556688	116	-0.279917	116	-0.2776673	116	-0.2524678	116	-0.24256	116	-0.2461141
116.2	0.4297823	116.2	0.3768139	116.2	0.4174541	116.2	0.4461176	116.2	0.4018545	116.2	0.4445939	116.2	0.510954	116.2	-0.2849512	116.2	-0.2385179	116.2	-0.3066967	116.2	-0.2602355	116.2	-0.2769979	116.2	-0.2773616	116.2	-0.2564559	116.2	-0.2438329	116.2	-0.2436759
116.4	0.4339915	116.4	0.3825417	116.4	0.4198152	116.4	0.4526002	116.4	0.4128762	116.4	0.4449806	116.4	0.5111241	116.4	-0.2803475	116.4	-0.2431196	116.4	-0.303787	116.4	-0.2609334	116.4	-0.2755134	116.4	-0.2768423	116.4	-0.2528164	116.4	-0.2431332	116.4	-0.2513078
116.6	0.4357333	116.6	0.3853731	116.6	0.4227823	116.6	0.4514325	116.6	0.4115602	116.6	0.4500461	116.6	0.5169538	116.6	-0.2821797	116.6	-0.2407663	116.6	-0.3072275	116.6	-0.258982	116.6	-0.2723889	116.6	-0.2717788	116.6	-0.2538234	116.6	-0.2402395	116.6	-0.2496339
116.8	0.4410594	116.8	0.3904943	116.8	0.4256404	116.8	0.4545391	116.8	0.415513	116.8	0.4559309	116.8	0.5201051	116.8	-0.276344	116.8	-0.2404046	116.8	-0.3041235	116.8	-0.2616111	116.8	-0.2740261	116.8	-0.2719639	116.8	-0.254869	116.8	-0.2397112	116.8	-0.2448905
117	0.4471036	117	0.3885704	117	0.4265055	117	0.4620771	117	0.4223104	117	0.4577088	117	0.5251265	117	-0.2770111	117	-0.2404689	117	-0.3073725	117	-0.2544	117	-0.2767929	117	-0.2765276	117	-0.2493892	117	-0.2419405	117	-0.2403312
117.2	0.4499745	117.2	0.3966475	117.2	0.4361236	117.2	0.465571	117.2	0.4249046	117.2	0.4628757	117.2	0.5270405	117.2	-0.2768036	117.2	-0.2413596	117.2	-0.3019856	117.2	-0.2603887	117.2	-0.272908	117.2	-0.2733621	117.2	-0.2496872	117.2	-0.2401799	117.2	-0.24207
117.4	0.4513143	117.4	0.3951698	117.4	0.4343626	117.4	0.4719163	117.4	0.425884	117.4	0.4632276	117.4	0.5311468	117.4	-0.2804849	117.4	-0.2373175	117.4	-0.3050379	117.4	-0.2518972	117.4	-0.2753158	117.4	-0.2708069	117.4	-0.2482855	117.4	-0.2387122	117.4	-0.2438016
117.6	0.4505959	117.6	0.4030945	117.6	0.4392438	117.6	0.4725415	117.6	0.4318404	117.6	0.4679229	117.6	0.533466	117.6	-0.2782758	117.6	-0.239536	117.6	-0.3041478	117.6	-0.254836	117.6	-0.276215	117.6	-0.2723557	117.6	-0.2478885	117.6	-0.2378174	117.6	-0.2377427
117.8	0.459879	117.8	0.4059545	117.8	0.4436516	117.8	0.4748298	117.8	0.4361256	117.8	0.4703183	117.8	0.5389473	117.8	-0.2788443	117.8	-0.2329586	117.8	-0.3044826	117.8	-0.2586887	117.8	-0.2754989	117.8	-0.271004	117.8	-0.2477132	117.8	-0.2369817	117.8	-0.242495
118	0.4614604	118	0.4111414	118	0.4489959	118	0.4756442	118	0.4368832	118	0.4769314	118	0.5400139	118	-0.273291	118	-0.2353163	118	-0.2976238	118	-0.2573212	118	-0.2677644	118	-0.267803	118	-0.2468747	118	-0.237355	118	-0.239962
118.2	0.4660774	118.2	0.4101216	118.2	0.4490109	118.2	0.4833432	118.2	0.4460617	118.2	0.4795977	118.2	0.5449491	118.2	-0.2784443	118.2	-0.2396039	118.2	-0.3022861	118.2	-0.2580138	118.2	-0.2706286	118.2	-0.2710064	118.2	-0.2517968	118.2	-0.2362514	118.2	-0.2423164
118.4	0.4628948	118.4	0.415714	118.4	0.4533135	118.4	0.4880681	118.4	0.4476548	118.4	0.4782739	118.4	0.5517562	118.4	-0.2806965	118.4	-0.2367953	118.4	-0.2994424	118.4	-0.2521293	118.4	-0.2770911	118.4	-0.271967	118.4	-0.2544391	118.4	-0.2354564	118.4	-0.2443694
118.6	0.4735957	118.6	0.4176113	118.6	0.4650649	118.6	0.4899978	118.6	0.446944	118.6	0.4829675	118.6	0.553843	118.6	-0.2782052	118.6	-0.238655	118.6	-0.3019774	118.6	-0.2527827	118.6	-0.2709111	118.6	-0.2727711	118.6	-0.2420846	118.6	-0.2350778	118.6	-0.2441403
118.8	0.4731175	118.8	0.4253316	118.8	0.461855	118.8	0.4867276	118.8	0.4484762	118.8	0.49021	118.8	0.5567299	118.8	-0.274448	118.8	-0.2359334	118.8	-0.3034125	118.8	-0.2536124	118.8	-0.2731037	118.8	-0.2678348	118.8	-0.2525955	118.8	-0.2361856	118.8	-0.2423992
119	0.4845513	119	0.4240827	119	0.4696694	119	0.4905387	119	0.4569851	119	0.4928642	119	0.5622911	119	-0.2792648	119	-0.2350937	119	-0.3017199	119	-0.2534717	119	-0.2676916	119	-0.2703465	119	-0.2476733	119	-0.2405035	119	-0.24414
119.21	0.4820824	119.21	0.4342348	119.21	0.4698656	119.21	0.4981998	119.21	0.4560053	119.21	0.495827	119.21	0.5635313	119.21	-0.2756245	119.2	-0.2311979	119.2	-0.3009585	119.2	-0.2552057	119.2	-0.2716013	119.2	-0.2704407	119.2	-0.2446689	119.2	-0.2343735	119.2	-0.2421004
119.4	0.4857951	119.4	0.4326077	119.4	0.473232	119.4	0.5019183	119.4	0.4571245	119.4	0.4986133	119.4	0.5673085	119.4	-0.2792932	119.4	-0.2347509	119.4	-0.2974994	119.4	-0.2514944	119.4	-0.2738242	119.4	-0.2656084	119.4	-0.245756	119.4	-0.2351681	119.4	-0.2384859
119.6	0.4872244	119.6	0.4321381	119.6	0.4730959	119.6	0.5059397	119.6	0.4625831	119.6	0.5012906	119.6	0.5663431	119.6	-0.2816808	119.6	-0.237286	119.6	-0.3006135	119.6	-0.2528365	119.6	-0.2697197	119.6	-0.271858	119.6	-0.2454795	119.6	-0.2398816	119.6	-0.2402526
119.8	0.4887331	119.8	0.4348503	119.8	0.4758461	119.8	0.5082268	119.8	0.4624494	119.8	0.5071852	119.8	0.5719213	119.8	-0.2809871	119.8	-0.2344852	119.8	-0.2981831	119.8	-0.2516617	119.8	-0.2691351	119.8	-0.2685955	119.8	-0.2445582	119.8	-0.2330476	119.8	-0.2401509
120	0.4978195	120	0.4426498	120	0.4844905	120	0.5145554	120	0.4689527	120	0.5029909	120	0.5703706	120	-0.2743565	120	-0.2354413	120	-0.3013925	120	-0.2514875	120	-0.2707693	120	-0.268388	120	-0.2495974	120	-0.232872	120	-0.2383736
120.2	0.4999178	120.2	0.4512251	120.2	0.4830073	120.2	0.5171505	120.2	0.4754719	120.2	0.5120466	120.2	0.5770451	120.2	-0.2751422	120.2	-0.2357562	120.2	-0.2947044	120.2	-0.2545398	120.2	-0.274377	120.2	-0.2750584	120.2	-0.2413518	120.2	-0.2381256	120.2	-0.2395901
120.4	0.5035011	120.4	0.4483586	120.4	0.4862717	120.4	0.5193443	120.4	0.4775951	120.4	0.5178779	120.4	0.5826845	120.4	-0.2751382	120.4	-0.2349701	120.4	-0.2975586	120.4	-0.2529031	120.4	-0.272285	120.4	-0.2695389	120.4	-0.2433085	120.4	-0.232154	120.4	-0.2379607
120.6	0.5069688	120.6	0.4551997	120.6	0.4878571	120.6	0.5208937	120.6	0.4850093	120.6	0.515659	120.6	0.5844987	120.6	-0.2744811	120.6	-0.235543	120.6	-0.2962714	120.6	-0.2535931	120.6	-0.2677449	120.6	-0.2667258	120.6	-0.2481346	120.6	-0.2283612	120.6	-0.2388867
120.8	0.5091773	120.8	0.4547271	120.8	0.4955315	120.8	0.5211329	120.8	0.4870599	120.8	0.5196031	120.8	0.5903178	120.8	-0.2743872	120.8	-0.2355757	120.8	-0.2981998	120.8	-0.2486708	120.8	-0.2700803	120.8	-0.2710981	120.8	-0.2428599	120.8	-0.2330565	120.8	-0.2387712
121	0.507349	121	0.4560267	121	0.5019829	121	0.5308726	121	0.4854046	121	0.5241896	121	0.5933169	121	-0.2786007	121	-0.2352581	121	-0.2950562	121	-0.254656	121	-0.2723717	121	-0.2653524	121	-0.2462035	121	-0.2393215	121	-0.2429269
121.2	0.5097051	121.2	0.4605673	121.2	0.5002417	121.2	0.5304155	121.2	0.4903179	121.2	0.5274034	121.2	0.5930548	121.2	-0.2764924	121.2	-0.2330616	121.2	-0.2989205	121.2	-0.2516686	121.2	-0.264134	121.2	-0.2740465	121.2	-0.2416338	121.2	-0.2379983	121.2	-0.2383435
121.4	0.519512	121.4	0.4636255	121.4	0.5049315	121.4	0.5327967	121.4	0.4940204	121.4	0.5265608	121.4	0.5966741	121.4	-0.2724961	121.4	-0.23194	121.4	-0.2955646	121.4	-0.2497431	121.4	-0.2698596	121.4	-0.2678044	121.4	-0.241968	121.4	-0.2371873	121.4	-0.2357147
121.6	0.5216244	121.6	0.4647228	121.6	0.5088784	121.6	0.5383089	121.6	0.4951242	121.6	0.5307339	121.6	0.6007652	121.6	-0.2756822	121.6	-0.2301439	121.6	-0.2985405	121.6	-0.2473227	121.6	-0.2715685	121.6	-0.266419	121.6	-0.2457747	121.6	-0.2306823	121.6	-0.2365718
121.8	0.5177058	121.8	0.4719178	121.8	0.5100754	121.8	0.5371754	121.8	0.4990468	121.8	0.5347343	121.8	0.602727	121.8	-0.2742678	121.8	-0.2356545	121.8	-0.2964426	121.8	-0.25062	121.8	-0.2665884	121.8	-0.2641926	121.8	-0.2441075	121.8	-0.2333623	121.8	-0.2353222
122	0.5231028	122	0.4706541	122	0.5146388	122	0.5398512	122	0.5009357	122	0.5420321	122	0.6044309	122	-0.2750574	122	-0.2301883	122	-0.3018157	122	-0.2472443	122	-0.2698197	122	-0.2632807	122	-0.242723	122	-0.2321667	122	-0.234781
122.2	0.533268	122.2	0.475583	122.2	0.5118854	122.2	0.5460809	122.2	0.5029518	122.2	0.5423779	122.2	0.6101083	122.2	-0.2724592	122.2	-0.2327457	122.2	-0.2979428	122.2	-0.2492357	122.2	-0.2652823	122.2	-0.265402	122.2	-0.2428456	122.2	-0.2316616	122.2	-0.2411847
122.4	0.5303093	122.4	0.4810865	122.4	0.5139283	122.4	0.547479	122.4	0.5080854	122.4	0.5458894	122.4	0.6128641	122.4	-0.2733152	122.4	-0.2314906	122.4	-0.295632	122.4	-0.2512066	122.4	-0.2639945	122.4	-0.2645098	122.4	-0.2439234	122.4	-0.2305686	122.4	-0.2371609
122.6	0.5355148	122.6	0.4815726	122.6	0.5212538	122.6	0.5543461	122.6	0.5167031	122.6	0.5425602	122.6	0.6167628	122.6	-0.2694201	122.6	-0.2290911	122.6	-0.2971683	122.6	-0.2491102	122.6	-0.2676502	122.6	-0.2647358	122.6	-0.2459303	122.6	-0.233132	122.6	-0.2363723
122.8	0.539481	122.8	0.4844972	122.8	0.5281102	122.8	0.5541654	122.8	0.5120484	122.8	0.5489605	122.8	0.6127958	122.8	-0.2734578	122.8	-0.2314266	122.8	-0.2973433	122.8	-0.2487788	122.8	-0.2695503	122.8	-0.2684051	122.8	-0.2426009	122.8	-0.2306782	122.8	-0.23568
123	0.54238	123	0.4879427	123	0.5259552	123	0.5515171	123	0.514263	123	0.5462486	123	0.625087	123	-0.2724929	123	-0.2332083	123	-0.2925461	123	-0.2509868	123	-0.2661525	123	-0.2621441	123	-0.2422614	123	-0.2314596	123	-0.2383804
123.2	0.5440593	123.2	0.4903488	123.2	0.5272808	123.2	0.5589986	123.2	0.5181183	123.2	0.557134	123.2	0.6223652	123.2	-0.2700408	123.2	-0.2311666	123.2	-0.2970926	123.2	-0.2496631	123.2	-0.2622889	123.2	-0.2655942	123.2	-0.242208	123.2	-0.2303089	123.2	-0.2404243
123.4	0.543673	123.4	0.4944686	123.4	0.5311867	123.4	0.5602219	123.4	0.5181596	123.4	0.5620888	123.4	0.6257136	123.4	-0.2708957	123.4	-0.2327232	123.4	-0.2935305	123.4	-0.24816	123.4	-0.263876	123.4	-0.2687955	123.4	-0.2451849	123.4	-0.228978	123.4	-0.2338091
123.6	0.5493758	123.6	0.4934346	123.6	0.5382839	123.6	0.5665653	123.6	0.5264145	123.6	0.5584176	123.6	0.6294276	123.6	-0.2654676	123.6	-0.2247753	123.6	-0.2942533	123.6	-0.2497704	123.6	-0.2643125	123.6	-0.2621291	123.6	-0.2409173	123.6	-0.2286811	123.6	-0.2346303
123.8	0.5508405	123.8	0.5006488	123.8	0.5357928	123.8	0.5664142	123.8	0.5273459	123.8	0.5632483	123.8	0.6327895	123.8	-0.2631542	123.8	-0.2249329	123.8	-0.2940955	123.8	-0.2446487	123.8	-0.2682798	123.8	-0.2645062	123.8	-0.2433571	123.8	-0.2326375	123.8	-0.2357389
124	0.5581435	124	0.5010899	124	0.5417647	124	0.5727445	124	0.5348903	124	0.5695751	124	0.6389083	124	-0.270306	124	-0.2302561	124	-0.2921639	124	-0.2491579	124	-0.2648552	124	-0.2578638	124	-0.2392047	124	-0.2310188	124	-0.233212
124.2	0.5555618	124.2	0.5060411	124.2	0.5439244	124.2	0.5718738	124.2	0.5323921	124.2	0.5687014	124.2	0.6356083	124.2	-0.2687624	124.2	-0.2300688	124.2	-0.2893984	124.2	-0.2462072	124.2	-0.2642815	124.2	-0.2634841	124.2	-0.2438231	124.2	-0.2348645	124.2	-0.2369217
124.4	0.5599439	124.4	0.5059926	124.4	0.5473722	124.4	0.5759851	124.4	0.5306219	124.4	0.5742673	124.4	0.6416507	124.4	-0.2638305	124.4	-0.2300055	124.4	-0.297398	124.4	-0.2453512	124.4	-0.2586907	124.4	-0.2638761	124.4	-0.2369892	124.4	-0.2280861	124.4	-0.2344082
124.6	0.560019	124.6	0.5130044	124.6	0.549683	124.6	0.5784708	124.6	0.5346724	124.6	0.5732147	124.6	0.6443254	124.6	-0.2692781	124.6	-0.2252186	124.6	-0.2943259	124.6	-0.2476222	124.6	-0.2689764	124.6	-0.2629132	124.6	-0.2391389	124.6	-0.2293891	124.6	-0.2363144
124.8	0.5626407	124.8	0.5103706	124.8	0.5514419	124.8	0.5820889	124.8	0.5393592	124.8	0.5767169	124.8	0.6439674	124.8	-0.2706251	124.8	-0.2276072	124.8	-0.2944937	124.8	-0.2442072	124.8	-0.2642028	124.8	-0.262228	124.8	-0.2332343	124.8	-0.2302095	124.8	-0.2313596
125	0.5703545	125	0.5129315	125	0.5549389	125	0.5866312	125	0.5415508	125	0.5825827	125	0.6558539	125	-0.2661318	125	-0.2246629	125	-0.2968336	125	-0.2428641	125	-0.2646457	125	-0.2647566	125	-0.2376188	125	-0.2274056	125	-0.232751
125.2	0.5679418	125.2	0.5169944	125.2	0.5578722	125.2	0.5859374	125.2	0.5478957	125.2	0.5820525	125.2	0.6519601	125.2	-0.26992	125.2	-0.2246925	125.2	-0.2920198	125.2	-0.2436755	125.2	-0.268484	125.2	-0.2635901	125.2	-0.2396311	125.2	-0.2292235	125.2	-0.2337669
125.4	0.5759242	125.4	0.5199418	125.4	0.56177	125.4	0.5915201	125.4	0.5469862	125.4	0.5820286	125.4	0.65412	125.4	-0.266931	125.4	-0.2268507	125.4	-0.2885719	125.4	-0.2452167	125.4	-0.2577902	125.4	-0.2626086	125.4	-0.2384554	125.4	-0.2300716	125.4	-0.2311858
125.6	0.5743214	125.6	0.5230216	125.6	0.5599477	125.6	0.593052	125.6	0.5549535	125.6	0.5926453	125.6	0.6597176	125.6	-0.2676217	125.6	-0.2255183	125.6	-0.2950945	125.6	-0.2465133	125.6	-0.2625108	125.6	-0.2643328	125.6	-0.2408355	125.6	-0.2299015	125.6	-0.2326427
125.8	0.5805606	125.8	0.5261467	125.8	0.5637985	125.8	0.5962795	125.8	0.5538824	125.8	0.5898018	125.8	0.6595719	125.8	-0.2750712	125.8	-0.2264391	125.8	-0.2889178	125.8	-0.2434069	125.8	-0.2608439	125.8	-0.259536	125.8	-0.2422136	125.8	-0.2273981	125.8	-0.2305884
126	0.5777949	126	0.5242529	126	0.5656241	126	0.5938896	126	0.5563733	126	0.5917978	126	0.6640967	126	-0.2663904	126	-0.2301514	126	-0.2924984	126	-0.2444932	126	-0.2607713	126	-0.2621478	126	-0.2410531	126	-0.2283976	126	-0.237085
126.2	0.5807899	126.2	0.5334529	126.2	0.5681748	126.2	0.5969954	126.2	0.5610476	126.2	0.59989	126.2	0.6653673	126.2	-0.2691909	126.2	-0.229149	126.2	-0.2903931	126.2	-0.2421061	126.2	-0.2653247	126.2	-0.2595096	126.2	-0.238286	126.2	-0.2269278	126.2	-0.2331828
126.4	0.5868549	126.4	0.5270284	126.4	0.5721611	126.4	0.6051368	126.4	0.5610688	126.4	0.5960283	126.4	0.6675966	126.4	-0.2691139	126.4	-0.22535	126.4	-0.290484	126.4	-0.2432395	126.4	-0.2601696	126.4	-0.2629184	126.4	-0.2371356	126.4	-0.2298119	126.4	-0.2352531
126.6	0.5911263	126.6	0.5367637	126.6	0.5765432	126.6	0.602159	126.6	0.5629146	126.6	0.5985041	126.6	0.6658542	126.6	-0.2692631	126.6	-0.2267234	126.6	-0.2898986	126.6	-0.2434136	126.6	-0.2600203	126.6	-0.2590115	126.6	-0.2363064	126.6	-0.2276249	126.6	-0.228598
126.8	0.5858614	126.8	0.5415261	126.8	0.5800042	126.8	0.6059529	126.8	0.5685763	126.8	0.6064616	126.8	0.6707656	126.8	-0.2625226	126.8	-0.2241422	126.8	-0.2880098	126.8	-0.2419435	126.8	-0.2609921	126.8	-0.2597616	126.8	-0.2349136	126.8	-0.2254612	126.8	-0.2316792
127	0.5926722	127	0.5410855	127	0.5782123	127	0.6077067	127	0.5667198	127	0.6071739	127	0.6760962	127	-0.2658388	127	-0.2284759	127	-0.2901524	127	-0.2449128	127	-0.2628404	127	-0.2550791	127	-0.2361994	127	-0.2302168	127	-0.2311155
127.2	0.5971566	127.2	0.5419016	127.2	0.5834635	127.2	0.6164249	127.2	0.5731711	127.2	0.6096012	127.2	0.6824936	127.2	-0.2646814	127.2	-0.2269233	127.2	-0.2878107	127.2	-0.2380062	127.2	-0.2589007	127.2	-0.2560887	127.2	-0.2354179	127.2	-0.2281035	127.2	-0.2334343
127.4	0.5971667	127.4	0.5461037	127.4	0.5855404	127.4	0.6118762	127.4	0.5738078	127.4	0.6134191	127.4	0.6834829	127.4	-0.2659253	127.4	-0.2226245	127.4	-0.2853287	127.4	-0.2442922	127.4	-0.2571893	127.4	-0.2568167	127.4	-0.2357529	127.4	-0.2254153	127.4	-0.2366716
127.6	0.6019413	127.6	0.5475836	127.6	0.5853302	127.6	0.619662	127.6	0.5769696	127.6	0.6098763	127.6	0.6827826	127.6	-0.2663621	127.6	-0.223343	127.6	-0.2886332	127.6	-0.2414563	127.6	-0.2600929	127.6	-0.2587083	127.6	-0.2343795	127.6	-0.2261641	127.6	-0.2306822
127.8	0.6020932	127.8	0.5519143	127.8	0.5898451	127.8	0.6216817	127.8	0.5744927	127.8	0.6152952	127.8	0.6890292	127.8	-0.2663645	127.8	-0.2270253	127.8	-0.2913153	127.8	-0.2444984	127.8	-0.257665	127.8	-0.2584361	127.8	-0.234106	127.8	-0.2210179	127.8	-0.2284808
128	0.6023377	128	0.5505599	128	0.591242	128	0.6222363	128	0.5794412	128	0.6166256	128	0.6895486	128	-0.2639163	128	-0.2280138	128	-0.2907734	128	-0.2415135	128	-0.259982	128	-0.2559286	128	-0.2321769	128	-0.2268626	128	-0.2343057
128.2	0.6072224	128.2	0.5534449	128.2	0.5945255	128.2	0.6234716	128.2	0.5854105	128.2	0.6228981	128.2	0.6904063	128.2	-0.2645744	128.2	-0.2268957	128.2	-0.2912794	128.2	-0.2401212	128.2	-0.2613972	128.2	-0.2578658	128.2	-0.2361415	128.2	-0.227359	128.2	-0.2321319
128.4	0.6105058	128.4	0.5587903	128.4	0.5947978	128.4	0.625645	128.4	0.5844144	128.4	0.6266828	128.4	0.6945059	128.4	-0.2654805	128.4	-0.2239636	128.4	-0.2896943	128.4	-0.2395212	128.4	-0.2594313	128.4	-0.2570514	128.4	-0.2353897	128.4	-0.2253193	128.4	-0.2308802
128.6	0.6123707	128.6	0.5608059	128.6	0.5975934	128.6	0.6324767	128.6	0.5884832	128.6	0.6252616	128.6	0.7000073	128.6	-0.2640405	128.6	-0.2204481	128.6	-0.2846642	128.6	-0.2406473	128.6	-0.2583481	128.6	-0.2569466	128.6	-0.2365935	128.6	-0.2241169	128.6	-0.2353842
128.8	0.6164673	128.8	0.5633816	128.8	0.6023218	128.8	0.632503	128.8	0.5887766	128.8	0.6239238	128.8	0.6951061	128.8	-0.2642005	128.8	-0.2261855	128.8	-0.2898608	128.8	-0.237991	128.8	-0.2547717	128.8	-0.2552858	128.8	-0.2341104	128.8	-0.2248427	128.8	-0.2340297
129	0.6149454	129	0.5682852	129	0.6024657	129	0.633565	129	0.5930416	129	0.6302017	129	0.700906	129	-0.2658318	129	-0.2241842	129	-0.286091	129	-0.2385904	129	-0.262193	129	-0.2571763	129	-0.2317751	129	-0.2252138	129	-0.2316599
129.2	0.6223161	129.2	0.567779	129.2	0.6033319	129.2	0.6364289	129.2	0.5955919	129.2	0.6359667	129.2	0.7041063	129.2	-0.2622401	129.2	-0.2201094	129.2	-0.281345	129.2	-0.2387408	129.2	-0.259189	129.2	-0.2591795	129.2	-0.2323268	129.2	-0.2215045	129.2	-0.2304896
129.4	0.6210209	129.4	0.5638804	129.4	0.6078293	129.4	0.6370749	129.4	0.6017653	129.4	0.6316435	129.4	0.7050093	129.4	-0.2682872	129.4	-0.2216918	129.4	-0.287723	129.4	-0.2368325	129.4	-0.2563049	129.4	-0.2506689	129.4	-0.2331616	129.4	-0.2221939	129.4	-0.2318161
129.6	0.6303408	129.6	0.5712931	129.6	0.6087154	129.6	0.6439006	129.6	0.6019927	129.6	0.6354492	129.6	0.7077989	129.6	-0.2583801	129.6	-0.2229701	129.6	-0.2917835	129.6	-0.239138	129.6	-0.2570393	129.6	-0.2492788	129.6	-0.2351366	129.6	-0.2224159	129.6	-0.2296958
129.8	0.6252115	129.8	0.5730491	129.8	0.6129856	129.8	0.6382155	129.8	0.6024674	129.8	0.6364565	129.8	0.7126644	129.8	-0.2570513	129.8	-0.2203772	129.8	-0.289435	129.8	-0.2398101	129.8	-0.2568848	129.8	-0.2538238	129.8	-0.2362322	129.8	-0.2230013	129.8	-0.2250067
130	0.6271231	130	0.5765423	130	0.6123659	130	0.6447722	130	0.604041	130	0.6449454	130	0.7116855	130	-0.261268	130	-0.2200757	130	-0.2818448	130	-0.2346045	130	-0.2536011	130	-0.2572114	130	-0.2342229	130	-0.2257857	130	-0.2315812
130.2	0.6297716	130.2	0.5833127	130.2	0.6152428	130.2	0.6490523	130.2	0.6081361	130.2	0.6466061	130.2	0.7141255	130.2	-0.2615666	130.2	-0.2222097	130.2	-0.2826801	130.2	-0.2378696	130.2	-0.2568767	130.2	-0.2533542	130.2	-0.2343349	130.2	-0.2191658	130.2	-0.227721
130.4	0.6299532	130.4	0.5817134	130.4	0.6199	130.4	0.6506479	130.4	0.6099436	130.4	0.6493575	130.4	0.7137977	130.4	-0.2573518	130.4	-0.2179848	130.4	-0.2872496	130.4	-0.2359373	130.4	-0.2573186	130.4	-0.2538718	130.4	-0.2319439	130.4	-0.2193123	130.4	-0.2220604
130.6	0.6329806	130.6	0.5827166	130.6	0.6256065	130.6	0.6511374	130.6	0.6089804	130.6	0.648092	130.6	0.7145849	130.6	-0.2623609	130.6	-0.2221895	130.6	-0.28743	130.6	-0.2395716	130.6	-0.2566709	130.6	-0.2541907	130.6	-0.231344	130.6	-0.2245978	130.6	-0.2298556
130.8	0.6406991	130.8	0.5859954	130.8	0.6231533	130.8	0.6596701	130.8	0.6120064	130.8	0.6531075	130.8	0.7205696	130.8	-0.2574936	130.8	-0.2195684	130.8	-0.2841562	130.8	-0.2371564	130.8	-0.2549745	130.8	-0.2529915	130.8	-0.228436	130.8	-0.2199523	130.8	-0.2280324
131	0.640497	131	0.5881077	131	0.6280845	131	0.6615523	131	0.6102197	131	0.6572683	131	0.7213578	131	-0.2595654	131	-0.2196511	131	-0.2831326	131	-0.2365567	131	-0.2584735	131	-0.2540192	131	-0.2341695	131	-0.2245095	131	-0.2220751
131.2	0.641663	131.2	0.5918961	131.2	0.6259728	131.2	0.6607546	131.2	0.6144747	131.2	0.6550171	131.2	0.7235045	131.2	-0.2564418	131.2	-0.2190759	131.2	-0.2873802	131.2	-0.2366282	131.2	-0.2576288	131.2	-0.2549767	131.2	-0.2333827	131.2	-0.224149	131.2	-0.2262274
131.4	0.6448715	131.4	0.5917352	131.4	0.6301787	131.4	0.6579742	131.4	0.6240008	131.4	0.6617891	131.4	0.7235291	131.4	-0.2597688	131.4	-0.2208105	131.4	-0.2852094	131.4	-0.2387199	131.4	-0.2555217	131.4	-0.2552238	131.4	-0.2307578	131.4	-0.220333	131.4	-0.2298955
131.6	0.6443759	131.6	0.5984143	131.6	0.6322536	131.6	0.6681321	131.6	0.6223784	131.6	0.6586945	131.6	0.7240809	131.6	-0.2586397	131.6	-0.217853	131.6	-0.2797271	131.6	-0.2375091	131.6	-0.2592731	131.6	-0.2516477	131.6	-0.2315557	131.6	-0.2146839	131.6	-0.2265912
131.8	0.6449651	131.8	0.5966614	131.8	0.6350447	131.8	0.6648067	131.8	0.6224397	131.8	0.66321	131.8	0.7343886	131.8	-0.2567687	131.8	-0.2186417	131.8	-0.2847951	131.8	-0.2375212	131.8	-0.2517911	131.8	-0.2546014	131.8	-0.229166	131.8	-0.2169074	131.8	-0.2266547
132	0.6501794	132	0.6013585	132	0.6360834	132	0.6653162	132	0.6269639	132	0.66448	132	0.7363441	132	-0.2596546	132	-0.2177181	132	-0.2859408	132	-0.2354801	132	-0.2537594	132	-0.2501063	132	-0.231023	132	-0.2159384	132	-0.226137
132.2	0.6542307	132.2	0.6013545	132.2	0.6399027	132.2	0.6706033	132.2	0.6265357	132.2	0.6657729	132.2	0.7367268	132.2	-0.2579671	132.2	-0.215541	132.2	-0.2831704	132.2	-0.2319699	132.2	-0.2516953	132.2	-0.2504435	132.2	-0.2285766	132.2	-0.2179524	132.2	-0.2258608
132.4	0.6510781	132.4	0.5989912	132.4	0.638378	132.4	0.675032	132.4	0.6343356	132.4	0.6752619	132.4	0.7383349	132.4	-0.2587884	132.4	-0.2180702	132.4	-0.2812786	132.4	-0.2303553	132.4	-0.255156	132.4	-0.2516854	132.4	-0.2305976	132.4	-0.2220113	132.4	-0.2200488
132.6	0.6576428	132.6	0.6086726	132.6	0.6425072	132.6	0.6774861	132.6	0.6335561	132.6	0.6714127	132.6	0.738426	132.6	-0.2594645	132.6	-0.218806	132.6	-0.281846	132.6	-0.2338637	132.6	-0.2530015	132.6	-0.2517288	132.6	-0.2267779	132.6	-0.2200996	132.6	-0.2260482
132.8	0.6540735	132.8	0.6048573	132.8	0.6457121	132.8	0.6782042	132.8	0.6366283	132.8	0.6721311	132.8	0.7426315	132.8	-0.2575327	132.8	-0.2173755	132.8	-0.2804118	132.8	-0.2356244	132.8	-0.2523729	132.8	-0.2545178	132.8	-0.2249581	132.8	-0.2187587	132.8	-0.2264848
133	0.6595263	133	0.6117543	133	0.6518071	133	0.682803	133	0.6368665	133	0.6759334	133	0.744839	133	-0.2586938	133	-0.2141289	133	-0.2861369	133	-0.2350968	133	-0.2548288	133	-0.2514383	133	-0.227935	133	-0.2145793	133	-0.2237847
133.2	0.6657242	133.2	0.6093138	133.2	0.6457292	133.2	0.682268	133.2	0.6442206	133.2	0.6784879	133.2	0.7442109	133.2	-0.25461	133.2	-0.2218897	133.2	-0.2814912	133.2	-0.2335335	133.2	-0.2518673	133.2	-0.2495642	133.2	-0.2274612	133.2	-0.2193415	133.2	-0.2208612
133.4	0.6613711	133.4	0.6163075	133.4	0.6493466	133.4	0.6782679	133.4	0.6382743	133.4	0.6803565	133.4	0.7502719	133.4	-0.2519011	133.4	-0.2189098	133.4	-0.2803608	133.4	-0.2317882	133.4	-0.2505761	133.4	-0.2526122	133.4	-0.2275907	133.4	-0.2211396	133.4	-0.2183883
133.6	0.6629091	133.6	0.6144329	133.6	0.654878	133.6	0.6858996	133.6	0.6438594	133.6	0.6820612	133.6	0.7475386	133.6	-0.2573775	133.6	-0.2137285	133.6	-0.2784359	133.6	-0.2372804	133.6	-0.2529258	133.6	-0.253372	133.6	-0.2270663	133.6	-0.2166811	133.6	-0.2202352
133.8	0.6653261	133.8	0.6154858	133.8	0.6545495	133.8	0.681724	133.8	0.6519124	133.8	0.6876399	133.8	0.7532804	133.8	-0.2598141	133.8	-0.2176627	133.8	-0.2786923	133.8	-0.2347367	133.8	-0.2517551	133.8	-0.2529811	133.8	-0.2296814	133.8	-0.2192736	133.8	-0.2201385
134	0.6746002	134	0.6193181	134	0.6561592	134	0.6877118	134	0.6498641	134	0.6833522	134	0.7543643	134	-0.2577727	134	-0.2150482	134	-0.2798482	134	-0.2340692	134	-0.2514024	134	-0.2492017	134	-0.2261894	134	-0.2180753	134	-0.2214156
134.2	0.6742316	134.2	0.6197003	134.2	0.661791	134.2	0.6913121	134.2	0.6502413	134.2	0.6887251	134.2	0.7586278	134.2	-0.2566972	134.2	-0.2185289	134.2	-0.2787693	134.2	-0.2333309	134.2	-0.2545298	134.2	-0.2510945	134.2	-0.2247564	134.2	-0.2161073	134.2	-0.218824
134.4	0.6698612	134.4	0.6194457	134.4	0.6596568	134.4	0.6908432	134.4	0.6503501	134.4	0.692642	134.4	0.7617331	134.4	-0.2512106	134.4	-0.2156941	134.4	-0.2781336	134.4	-0.2338135	134.4	-0.2523889	134.4	-0.2517703	134.4	-0.2241181	134.4	-0.2203661	134.4	-0.2234428
134.6	0.6768688	134.6	0.6257288	134.6	0.6594654	134.6	0.6995624	134.6	0.6538906	134.6	0.6956167	134.6	0.758076	134.6	-0.2591842	134.6	-0.2136103	134.6	-0.2755145	134.6	-0.2297674	134.6	-0.2521244	134.6	-0.2479731	134.6	-0.2285042	134.6	-0.2171733	134.6	-0.2262112
134.8	0.6789468	134.8	0.6235076	134.8	0.6670203	134.8	0.7007065	134.8	0.6523396	134.8	0.6944633	134.8	0.7612908	134.8	-0.2550138	134.8	-0.2146838	134.8	-0.2780941	134.8	-0.2314028	134.8	-0.2509004	134.8	-0.2438557	134.8	-0.2279587	134.8	-0.2157418	134.8	-0.2213236
135	0.6810501	135	0.6277012	135	0.6677141	135	0.6955782	135	0.6540281	135	0.6970723	135	0.7677596	135	-0.2601652	135	-0.2141635	135	-0.2751422	135	-0.2319888	135	-0.2489888	135	-0.2480994	135	-0.2275753	135	-0.2128642	135	-0.2202552
135.2	0.684741	135.2	0.6309239	135.2	0.6719956	135.2	0.7018572	135.2	0.6634762	135.2	0.6949805	135.2	0.766138	135.2	-0.2564689	135.2	-0.2107976	135.2	-0.278111	135.2	-0.229465	135.2	-0.2513457	135.2	-0.2498538	135.2	-0.2312942	135.2	-0.2119299	135.2	-0.2170675
135.4	0.6853397	135.4	0.6283173	135.4	0.6691133	135.4	0.7056149	135.4	0.6591899	135.4	0.6965305	135.4	0.7701067	135.4	-0.2550104	135.4	-0.2189563	135.4	-0.2802314	135.4	-0.2329813	135.4	-0.2444386	135.4	-0.2453058	135.4	-0.2255897	135.4	-0.2154772	135.4	-0.2178383
135.6	0.6873005	135.6	0.6375611	135.6	0.6723459	135.6	0.7088005	135.6	0.6583283	135.6	0.6997291	135.6	0.7706367	135.6	-0.2531407	135.6	-0.2091828	135.6	-0.2835599	135.6	-0.2286923	135.6	-0.2474265	135.6	-0.2482839	135.6	-0.2263583	135.6	-0.2125484	135.6	-0.2223604
135.8	0.6835417	135.8	0.6393003	135.8	0.6758316	135.8	0.7094027	135.8	0.6637818	135.8	0.7034064	135.8	0.7747828	135.8	-0.2575817	135.8	-0.2142754	135.8	-0.2765237	135.8	-0.2338152	135.8	-0.2504447	135.8	-0.2453474	135.8	-0.2262188	135.8	-0.2191237	135.8	-0.2173494
136	0.6903473	136	0.6358583	136	0.6751373	136	0.7102459	136	0.6680036	136	0.7112445	136	0.7741802	136	-0.2522902	136	-0.2171912	136	-0.2811869	136	-0.225726	136	-0.2507135	136	-0.2474568	136	-0.2271097	136	-0.2166434	136	-0.2203708
136.2	0.6887564	136.2	0.6373726	136.2	0.6788761	136.2	0.70868	136.2	0.6686721	136.2	0.7093842	136.2	0.7779993	136.2	-0.2557563	136.2	-0.2148839	136.2	-0.2758618	136.2	-0.2280631	136.2	-0.2464887	136.2	-0.2460327	136.2	-0.2242005	136.2	-0.2130862	136.2	-0.2227928
136.4	0.6912072	136.4	0.6390218	136.4	0.680281	136.4	0.7137902	136.4	0.6655352	136.4	0.7058409	136.4	0.7784902	136.4	-0.25407	136.4	-0.2086993	136.4	-0.2741532	136.4	-0.2296756	136.4	-0.2500982	136.4	-0.2443209	136.4	-0.2188558	136.4	-0.2166105	136.4	-0.2170211
136.6	0.6935547	136.6	0.6448771	136.6	0.6810049	136.6	0.7170845	136.6	0.6725585	136.6	0.7111663	136.6	0.7840855	136.6	-0.252875	136.6	-0.215751	136.6	-0.2813714	136.6	-0.2304555	136.6	-0.2489309	136.6	-0.2484485	136.6	-0.2218769	136.6	-0.2153421	136.6	-0.2230905
136.8	0.6970646	136.8	0.647623	136.8	0.6822576	136.8	0.7218915	136.8	0.6750935	136.8	0.7132251	136.8	0.7844925	136.8	-0.2512055	136.8	-0.2105747	136.8	-0.2795869	136.8	-0.2354765	136.8	-0.2450494	136.8	-0.2459318	136.8	-0.2215183	136.8	-0.2106791	136.8	-0.2195183
137	0.6985943	137	0.6474639	137	0.684077	137	0.719479	137	0.6770884	137	0.7120771	137	0.779649	137	-0.2495532	137	-0.2134301	137	-0.2753519	137	-0.2283174	137	-0.2473776	137	-0.2463785	137	-0.2264775	137	-0.2156361	137	-0.2242977
137.2	0.6958064	137.2	0.6506326	137.2	0.6865724	137.2	0.7186663	137.2	0.6769081	137.2	0.7172182	137.2	0.7857349	137.2	-0.2526886	137.2	-0.2118846	137.2	-0.2775134	137.2	-0.2323033	137.2	-0.2436535	137.2	-0.2426002	137.2	-0.2251115	137.2	-0.2116877	137.2	-0.2160338
137.4	0.7038693	137.4	0.6534914	137.4	0.6860996	137.4	0.726878	137.4	0.6779565	137.4	0.7226851	137.4	0.7876911	137.4	-0.2493899	137.4	-0.2168318	137.4	-0.2724148	137.4	-0.2295274	137.4	-0.2450054	137.4	-0.2412354	137.4	-0.2241278	137.4	-0.2123311	137.4	-0.220632
137.6	0.6984501	137.6	0.6582723	137.6	0.6927609	137.6	0.7283715	137.6	0.6808448	137.6	0.7194378	137.6	0.7910346	137.6	-0.2497183	137.6	-0.212667	137.6	-0.2752216	137.6	-0.2311356	137.6	-0.2494061	137.6	-0.2441568	137.6	-0.2236405	137.6	-0.2144765	137.6	-0.2215315
137.8	0.7074544	137.8	0.6574283	137.8	0.6965948	137.8	0.7243901	137.8	0.6816222	137.8	0.7259839	137.8	0.7891117	137.8	-0.2494993	137.8	-0.2125169	137.8	-0.2779389	137.8	-0.2270562	137.8	-0.2455326	137.8	-0.2432498	137.8	-0.2270488	137.8	-0.2054028	137.8	-0.2169371
138	0.7057024	138	0.6593007	138	0.6911083	138	0.7254835	138	0.6907344	138	0.723062	138	0.7959483	138	-0.2535881	138	-0.2088744	138	-0.2760005	138	-0.2307007	138	-0.2436091	138	-0.2432109	138	-0.2201569	138	-0.2109473	138	-0.2173627
138.2	0.7051101	138.2	0.660877	138.2	0.7010714	138.2	0.7270716	138.2	0.6909063	138.2	0.7261881	138.2	0.7946033	138.2	-0.2551179	138.2	-0.2084386	138.2	-0.2734664	138.2	-0.231074	138.2	-0.2463335	138.2	-0.244989	138.2	-0.2233088	138.2	-0.2117655	138.2	-0.2180292
138.4	0.7082933	138.4	0.6634296	138.4	0.6995515	138.4	0.7322059	138.4	0.6912748	138.4	0.7276857	138.4	0.796796	138.4	-0.2519712	138.4	-0.2082396	138.4	-0.2747385	138.4	-0.2292485	138.4	-0.245708	138.4	-0.2421694	138.4	-0.2202017	138.4	-0.2143707	138.4	-0.2169733
138.6	0.7145819	138.6	0.6619113	138.6	0.7008122	138.6	0.7322825	138.6	0.6927776	138.6	0.729661	138.6	0.7993093	138.6	-0.2518311	138.6	-0.2103113	138.6	-0.2731881	138.6	-0.226686	138.6	-0.2457333	138.6	-0.2423913	138.6	-0.2224681	138.6	-0.2079674	138.6	-0.2163553
138.8	0.7130243	138.8	0.6647592	138.8	0.7030491	138.8	0.7347961	138.8	0.6913338	138.8	0.7328202	138.8	0.8045648	138.8	-0.2496626	138.8	-0.2064819	138.8	-0.2734032	138.8	-0.2269592	138.8	-0.2450387	138.8	-0.2438878	138.8	-0.2215997	138.8	-0.2104901	138.8	-0.2181031
139	0.7161353	139	0.6699883	139	0.7040145	139	0.7355183	139	0.693536	139	0.7316958	139	0.807768	139	-0.2474474	139	-0.208931	139	-0.2734056	139	-0.2252281	139	-0.243164	139	-0.2434454	139	-0.2223919	139	-0.2132374	139	-0.2165667
139.22	0.7183405	139.22	0.6695086	139.22	0.7097524	139.22	0.7377627	139.22	0.6948814	139.22	0.7360543	139.22	0.8030219	139.22	-0.2496044	139.2	-0.2091902	139.2	-0.2754276	139.2	-0.2250734	139.2	-0.2441688	139.2	-0.2428545	139.2	-0.2178161	139.2	-0.2093432	139.2	-0.2136319
139.4	0.7225011	139.4	0.6721022	139.4	0.7040722	139.4	0.740662	139.4	0.6942521	139.4	0.7339239	139.4	0.8050176	139.4	-0.2488845	139.4	-0.2083448	139.4	-0.2760398	139.4	-0.2267728	139.4	-0.2434979	139.4	-0.2425705	139.4	-0.2234571	139.4	-0.2084126	139.4	-0.2192183
139.6	0.7235281	139.6	0.6717541	139.6	0.7134206	139.6	0.7474276	139.6	0.6988086	139.6	0.7407408	139.6	0.8107938	139.6	-0.2484854	139.6	-0.2105351	139.6	-0.2732309	139.6	-0.2269088	139.6	-0.2465995	139.6	-0.2413262	139.6	-0.2138619	139.6	-0.2096349	139.6	-0.2158511
139.8	0.7200604	139.8	0.6770993	139.8	0.7105595	139.8	0.7447455	139.8	0.7026251	139.8	0.7370163	139.8	0.8087681	139.8	-0.2517076	139.8	-0.2095276	139.8	-0.2750791	139.8	-0.2280446	139.8	-0.2442607	139.8	-0.2469435	139.8	-0.220192	139.8	-0.210253	139.8	-0.2133398
140	0.7254832	140	0.6717141	140	0.7103187	140	0.7498307	140	0.7064149	140	0.7420336	140	0.8116981	140	-0.2480932	140	-0.208698	140	-0.2678654	140	-0.2253531	140	-0.2415551	140	-0.2403686	140	-0.2228355	140	-0.206483	140	-0.2142886
140.2	0.7292238	140.2	0.6747165	140.2	0.7143998	140.2	0.7493947	140.2	0.7023416	140.2	0.7453617	140.2	0.8146697	140.2	-0.2475906	140.2	-0.2041653	140.2	-0.2723758	140.2	-0.2255537	140.2	-0.2450358	140.2	-0.2412254	140.2	-0.2160481	140.2	-0.2054251	140.2	-0.2151212
140.4	0.7271717	140.4	0.6819463	140.4	0.716	140.4	0.7526505	140.4	0.7022108	140.4	0.7448709	140.4	0.8170084	140.4	-0.2425088	140.4	-0.2091845	140.4	-0.270763	140.4	-0.2229314	140.4	-0.2395773	140.4	-0.2398064	140.4	-0.219759	140.4	-0.2096805	140.4	-0.2126979
140.6	0.7303809	140.6	0.679152	140.6	0.7170982	140.6	0.7520883	140.6	0.7070894	140.6	0.7443656	140.6	0.8173473	140.6	-0.2422209	140.6	-0.2051553	140.6	-0.268623	140.6	-0.2269577	140.6	-0.2445133	140.6	-0.238858	140.6	-0.2213035	140.6	-0.2069303	140.6	-0.2117657
140.8	0.7275335	140.8	0.6772503	140.8	0.7235336	140.8	0.756382	140.8	0.7064843	140.8	0.7571262	140.8	0.8212281	140.8	-0.242096	140.8	-0.2097736	140.8	-0.2697865	140.8	-0.2295171	140.8	-0.2419713	140.8	-0.2424008	140.8	-0.2193025	140.8	-0.2090696	140.8	-0.2159303
141	0.7352702	141	0.6854947	141	0.7206715	141	0.7571698	141	0.7108342	141	0.7521675	141	0.8224915	141	-0.2479288	141	-0.2125	141	-0.2722807	141	-0.2249023	141	-0.2406008	141	-0.2424463	141	-0.2184458	141	-0.2070342	141	-0.2086292
141.2	0.7335915	141.2	0.6859975	141.2	0.7208975	141.2	0.7523776	141.2	0.710602	141.2	0.7510968	141.2	0.8211581	141.2	-0.2470418	141.2	-0.209133	141.2	-0.2718732	141.2	-0.227899	141.2	-0.2464902	141.2	-0.2432096	141.2	-0.2199348	141.2	-0.2071134	141.2	-0.2131802
141.4	0.7346712	141.4	0.6831752	141.4	0.7266952	141.4	0.7565799	141.4	0.7145751	141.4	0.7539577	141.4	0.8246524	141.4	-0.2441772	141.4	-0.2026993	141.4	-0.2737556	141.4	-0.2287193	141.4	-0.2432291	141.4	-0.2390911	141.4	-0.2178719	141.4	-0.2087159	141.4	-0.2179631
141.6	0.7388163	141.6	0.6860502	141.6	0.7242159	141.6	0.7590197	141.6	0.7179031	141.6	0.7563257	141.6	0.82359	141.6	-0.2459125	141.6	-0.20678	141.6	-0.269044	141.6	-0.2204655	141.6	-0.2459436	141.6	-0.2385137	141.6	-0.2185662	141.6	-0.2055889	141.6	-0.2113845
141.8	0.7384541	141.8	0.6927722	141.8	0.7273886	141.8	0.7603543	141.8	0.7176704	141.8	0.7559884	141.8	0.8237551	141.8	-0.244095	141.8	-0.2019546	141.8	-0.2728484	141.8	-0.222865	141.8	-0.2406144	141.8	-0.2439905	141.8	-0.214404	141.8	-0.2067599	141.8	-0.2106718
142	0.7360957	142	0.6923898	142	0.7305964	142	0.7641541	142	0.717804	142	0.7577293	142	0.8279221	142	-0.2445932	142	-0.20871	142	-0.2750001	142	-0.2263213	142	-0.2434641	142	-0.2450391	142	-0.2161732	142	-0.204947	142	-0.2189927
142.2	0.7442982	142.2	0.6935689	142.2	0.7303128	142.2	0.7655359	142.2	0.7192206	142.2	0.7586457	142.2	0.8296287	142.2	-0.2455351	142.2	-0.2046549	142.2	-0.2681784	142.2	-0.2233675	142.2	-0.2419765	142.2	-0.240546	142.2	-0.2179897	142.2	-0.2086604	142.2	-0.2114554
142.4	0.7461486	142.4	0.6962653	142.4	0.732567	142.4	0.7642673	142.4	0.7275631	142.4	0.7677833	142.4	0.8328052	142.4	-0.2489105	142.4	-0.2056639	142.4	-0.2722925	142.4	-0.2211242	142.4	-0.2406806	142.4	-0.2376979	142.4	-0.2142006	142.4	-0.2065343	142.4	-0.213553
142.6	0.744575	142.6	0.69684	142.6	0.741649	142.6	0.7670768	142.6	0.726118	142.6	0.7649291	142.6	0.8330072	142.6	-0.2423664	142.6	-0.2081209	142.6	-0.2680437	142.6	-0.2242564	142.6	-0.2439337	142.6	-0.2389092	142.6	-0.2186755	142.6	-0.205941	142.6	-0.2149733
142.8	0.7456171	142.8	0.6971346	142.8	0.7390542	142.8	0.7696674	142.8	0.7261467	142.8	0.7657274	142.8	0.8372195	142.8	-0.2417526	142.8	-0.2015059	142.8	-0.2667187	142.8	-0.2167812	142.8	-0.2406071	142.8	-0.2356935	142.8	-0.2222043	142.8	-0.2039742	142.8	-0.2097205
143	0.74685	143	0.6983168	143	0.7357128	143	0.769893	143	0.7294824	143	0.7664438	143	0.8380555	143	-0.2443348	143	-0.2032883	143	-0.2665513	143	-0.2207962	143	-0.2405232	143	-0.2379352	143	-0.2105538	143	-0.2064536	143	-0.2114084
143.2	0.7506783	143.2	0.704357	143.2	0.7396125	143.2	0.7724879	143.2	0.7299188	143.2	0.767598	143.2	0.8414261	143.2	-0.2449444	143.2	-0.2052113	143.2	-0.2674704	143.2	-0.2281886	143.2	-0.2378902	143.2	-0.2408704	143.2	-0.2152024	143.2	-0.2062803	143.2	-0.2126218
143.4	0.7575705	143.4	0.7029013	143.4	0.7423758	143.4	0.7786025	143.4	0.7309469	143.4	0.7689843	143.4	0.8398757	143.4	-0.2443816	143.4	-0.2066996	143.4	-0.2659905	143.4	-0.2215373	143.4	-0.2392994	143.4	-0.2354692	143.4	-0.2169873	143.4	-0.2052632	143.4	-0.2135631
143.6	0.7537628	143.6	0.7056835	143.6	0.741558	143.6	0.7752846	143.6	0.7318143	143.6	0.7769373	143.6	0.8441816	143.6	-0.2432013	143.6	-0.2064049	143.6	-0.2681412	143.6	-0.222795	143.6	-0.242259	143.6	-0.236201	143.6	-0.2126789	143.6	-0.2069956	143.6	-0.2098999
143.8	0.7554393	143.8	0.7032432	143.8	0.7439904	143.8	0.7764772	143.8	0.7366772	143.8	0.773276	143.8	0.8413897	143.8	-0.2388595	143.8	-0.2063701	143.8	-0.2695339	143.8	-0.2244276	143.8	-0.2412722	143.8	-0.2339014	143.8	-0.2158599	143.8	-0.205522	143.8	-0.2128571
144	0.7588905	144	0.7120675	144	0.7434694	144	0.7782245	144	0.7381689	144	0.7745798	144	0.8440266	144	-0.2422729	144	-0.2041443	144	-0.2687469	144	-0.2197737	144	-0.2416279	144	-0.2332606	144	-0.2159993	144	-0.2040395	144	-0.210392
144.2	0.7579287	144.2	0.7105474	144.2	0.7482871	144.2	0.7863793	144.2	0.7430742	144.2	0.7749143	144.2	0.8450225	144.2	-0.2415129	144.2	-0.2024916	144.2	-0.2732012	144.2	-0.2214534	144.2	-0.2379681	144.2	-0.2367929	144.2	-0.2195618	144.2	-0.2030326	144.2	-0.2115576
144.4	0.7573223	144.4	0.7054636	144.4	0.7478043	144.4	0.7859665	144.4	0.7403064	144.4	0.7789297	144.4	0.8515223	144.4	-0.2451063	144.4	-0.2070309	144.4	-0.2681917	144.4	-0.2226052	144.4	-0.2370092	144.4	-0.2387898	144.4	-0.2145445	144.4	-0.2064212	144.4	-0.2115937
144.6	0.7578791	144.6	0.7086804	144.6	0.7503898	144.6	0.7847618	144.6	0.7399932	144.6	0.7844629	144.6	0.850309	144.6	-0.2409867	144.6	-0.202842	144.6	-0.2701702	144.6	-0.221039	144.6	-0.2387427	144.6	-0.235865	144.6	-0.21787	144.6	-0.20534	144.6	-0.2092881
144.8	0.761096	144.8	0.7178615	144.8	0.7571094	144.8	0.7867852	144.8	0.7458493	144.8	0.7827606	144.8	0.8500535	144.8	-0.2442332	144.8	-0.2026587	144.8	-0.267271	144.8	-0.2191431	144.8	-0.2390248	144.8	-0.2367986	144.8	-0.2156343	144.8	-0.202772	144.8	-0.2122079
145	0.7629113	145	0.7154471	145	0.7535915	145	0.7887961	145	0.745105	145	0.7794709	145	0.8515006	145	-0.2467143	145	-0.2008793	145	-0.2665587	145	-0.2188467	145	-0.239738	145	-0.2355504	145	-0.2181154	145	-0.2023312	145	-0.2080016
145.2	0.7684672	145.2	0.7195281	145.2	0.7543663	145.2	0.7872945	145.2	0.7469358	145.2	0.7812256	145.2	0.8525553	145.2	-0.2411094	145.2	-0.2039726	145.2	-0.2654873	145.2	-0.2171167	145.2	-0.237214	145.2	-0.2360148	145.2	-0.2144183	145.2	-0.2056365	145.2	-0.2117578
145.4	0.765355	145.4	0.713451	145.4	0.757172	145.4	0.7902977	145.4	0.7464252	145.4	0.7862988	145.4	0.8528365	145.4	-0.2433109	145.4	-0.2010268	145.4	-0.2611468	145.4	-0.216791	145.4	-0.2394445	145.4	-0.2361732	145.4	-0.2116378	145.4	-0.2047169	145.4	-0.2066779
145.6	0.7644351	145.6	0.7149674	145.6	0.7588972	145.6	0.7954453	145.6	0.7478986	145.6	0.7877442	145.6	0.8605829	145.6	-0.2434728	145.6	-0.2002442	145.6	-0.2691667	145.6	-0.2170402	145.6	-0.2410319	145.6	-0.2350535	145.6	-0.2156994	145.6	-0.1997116	145.6	-0.2095085
145.8	0.7740954	145.8	0.7205948	145.8	0.7628276	145.8	0.7963251	145.8	0.7521499	145.8	0.7896428	145.8	0.8586181	145.8	-0.2375967	145.8	-0.2017063	145.8	-0.2653432	145.8	-0.2198202	145.8	-0.2375047	145.8	-0.2373071	145.8	-0.2104261	145.8	-0.2009718	145.8	-0.2112915
146	0.76666	146	0.722871	146	0.7654631	146	0.7940304	146	0.7534947	146	0.7930597	146	0.8648605	146	-0.2423013	146	-0.1995766	146	-0.2679059	146	-0.2211848	146	-0.2380351	146	-0.2360655	146	-0.214066	146	-0.205296	146	-0.2099691
146.2	0.775562	146.2	0.7295976	146.2	0.7616717	146.2	0.7924976	146.2	0.7523211	146.2	0.7942739	146.2	0.8581364	146.2	-0.2408017	146.2	-0.2048437	146.2	-0.2665867	146.2	-0.2180987	146.2	-0.2334974	146.2	-0.2366678	146.2	-0.2087541	146.2	-0.2021767	146.2	-0.2090749
146.4	0.7761582	146.4	0.7233011	146.4	0.7682903	146.4	0.7983989	146.4	0.755924	146.4	0.7911969	146.4	0.863335	146.4	-0.2397644	146.4	-0.2071083	146.4	-0.2616992	146.4	-0.2173564	146.4	-0.2345134	146.4	-0.2396424	146.4	-0.2143127	146.4	-0.1999336	146.4	-0.2121046
146.6	0.7739634	146.6	0.7275788	146.6	0.7652263	146.6	0.8012642	146.6	0.759211	146.6	0.7972972	146.6	0.8640206	146.6	-0.2391678	146.6	-0.2052743	146.6	-0.267814	146.6	-0.2195109	146.6	-0.232883	146.6	-0.2327579	146.6	-0.2131583	146.6	-0.2001749	146.6	-0.2088364
146.8	0.7761427	146.8	0.7276302	146.8	0.7640857	146.8	0.8021955	146.8	0.754535	146.8	0.7982878	146.8	0.8657831	146.8	-0.2401505	146.8	-0.1996643	146.8	-0.2622406	146.8	-0.2169336	146.8	-0.2412454	146.8	-0.2322574	146.8	-0.2121569	146.8	-0.2033536	146.8	-0.2069513
147	0.7764512	147	0.7297942	147	0.7661754	147	0.8060821	147	0.7574787	147	0.798889	147	0.8684293	147	-0.2437605	147	-0.2010542	147	-0.260787	147	-0.2179758	147	-0.2383541	147	-0.2352701	147	-0.2134915	147	-0.2012792	147	-0.2089318
147.2	0.779154	147.2	0.7350483	147.2	0.7693976	147.2	0.8075503	147.2	0.7597349	147.2	0.8050288	147.2	0.8665055	147.2	-0.2428663	147.2	-0.2027455	147.2	-0.2622619	147.2	-0.2144723	147.2	-0.232593	147.2	-0.2322052	147.2	-0.2100665	147.2	-0.2101811	147.2	-0.2111305
147.4	0.7815275	147.4	0.7333333	147.4	0.7680043	147.4	0.8077864	147.4	0.7636635	147.4	0.8017765	147.4	0.869119	147.4	-0.2381573	147.4	-0.2010597	147.4	-0.2604795	147.4	-0.2175056	147.4	-0.2381299	147.4	-0.2296531	147.4	-0.2132155	147.4	-0.2047277	147.4	-0.2094318
147.6	0.7784243	147.6	0.7392823	147.6	0.7761581	147.6	0.8091674	147.6	0.7606812	147.6	0.8009267	147.6	0.8730385	147.6	-0.2378038	147.6	-0.19895	147.6	-0.260877	147.6	-0.2210354	147.6	-0.2351114	147.6	-0.2317981	147.6	-0.2081248	147.6	-0.2011107	147.6	-0.2127243
147.8	0.7836526	147.8	0.7389883	147.8	0.7773831	147.8	0.8088487	147.8	0.7643219	147.8	0.8043757	147.8	0.8749676	147.8	-0.2374396	147.8	-0.1975174	147.8	-0.2642008	147.8	-0.2161139	147.8	-0.2331193	147.8	-0.2294465	147.8	-0.209389	147.8	-0.2000163	147.8	-0.2062456
148	0.7859728	148	0.7359197	148	0.7733365	148	0.8141687	148	0.7665407	148	0.808225	148	0.8740016	148	-0.2399733	148	-0.1987894	148	-0.2623414	148	-0.2151892	148	-0.2312246	148	-0.2336527	148	-0.2109914	148	-0.2022729	148	-0.2118457
148.2	0.7915037	148.2	0.7374689	148.2	0.7730958	148.2	0.8117502	148.2	0.7671465	148.2	0.8064315	148.2	0.877072	148.2	-0.2416603	148.2	-0.2002293	148.2	-0.2650642	148.2	-0.2135929	148.2	-0.2365866	148.2	-0.2350646	148.2	-0.210369	148.2	-0.2012068	148.2	-0.2109587
148.4	0.7880881	148.4	0.7389228	148.4	0.7840239	148.4	0.8140137	148.4	0.7776873	148.4	0.8088759	148.4	0.8864942	148.4	-0.236157	148.4	-0.2008131	148.4	-0.2663211	148.4	-0.2159445	148.4	-0.2328374	148.4	-0.2353044	148.4	-0.2110079	148.4	-0.1995884	148.4	-0.2064862
148.6	0.7879044	148.6	0.7393258	148.6	0.7815146	148.6	0.8149233	148.6	0.7675299	148.6	0.8118614	148.6	0.8807783	148.6	-0.2367265	148.6	-0.1968385	148.6	-0.2616249	148.6	-0.2165553	148.6	-0.2362722	148.6	-0.2317218	148.6	-0.2078319	148.6	-0.1991536	148.6	-0.2088312
148.8	0.7885159	148.8	0.7445679	148.8	0.7829734	148.8	0.8172846	148.8	0.7698578	148.8	0.8104739	148.8	0.8854897	148.8	-0.231725	148.8	-0.1972239	148.8	-0.2618007	148.8	-0.2172645	148.8	-0.2341626	148.8	-0.2312839	148.8	-0.2123367	148.8	-0.1979227	148.8	-0.2135934
149	0.7920535	149	0.7434433	149	0.7828333	149	0.8188143	149	0.7718277	149	0.8139433	149	0.8845963	149	-0.2371141	149	-0.1978492	149	-0.2664672	149	-0.2152631	149	-0.2306242	149	-0.2306252	149	-0.2089843	149	-0.1997176	149	-0.2056248
149.2	0.7940473	149.2	0.7471046	149.2	0.7817076	149.2	0.8206152	149.2	0.7743655	149.2	0.8136433	149.2	0.8850998	149.2	-0.2315602	149.2	-0.1956174	149.2	-0.2627324	149.2	-0.212435	149.2	-0.2354755	149.2	-0.2362783	149.2	-0.2098294	149.2	-0.2015669	149.2	-0.2032488
149.4	0.7961161	149.4	0.745746	149.4	0.7841698	149.4	0.823315	149.4	0.7762045	149.4	0.8165078	149.4	0.8882202	149.4	-0.2352224	149.4	-0.1968794	149.4	-0.2616088	149.4	-0.216526	149.4	-0.2352251	149.4	-0.2332918	149.4	-0.211528	149.4	-0.1995848	149.4	-0.20386
149.6	0.7979848	149.6	0.7506118	149.6	0.7857536	149.6	0.8235333	149.6	0.7808244	149.6	0.8203834	149.6	0.8900118	149.6	-0.2364529	149.6	-0.1976993	149.6	-0.2594534	149.6	-0.2139797	149.6	-0.2295322	149.6	-0.2300379	149.6	-0.2037475	149.6	-0.199301	149.6	-0.2114244
149.8	0.7985595	149.8	0.7524629	149.8	0.7844018	149.8	0.8228508	149.8	0.7799333	149.8	0.8165639	149.8	0.8860198	149.8	-0.2371673	149.81	-0.1990648	149.81	-0.2610245	149.81	-0.2154341	149.81	-0.2351274	149.81	-0.2352034	149.81	-0.2081584	149.81	-0.2023596	149.81	-0.2072715
150	0.7959167	150	0.7532808	150	0.787644	150	0.8254508	150	0.7800471	150	0.8236523	150	0.8902162	150	-0.2362852	150	-0.1981477	150	-0.2608893	150	-0.2132838	150	-0.2362139	150	-0.2262046	150	-0.2084555	150	-0.1981034	150	-0.2022611
150.2	0.8041425	150.2	0.7571241	150.2	0.7942474	150.2	0.8286718	150.2	0.7790886	150.2	0.8163199	150.2	0.8944108	150.2	-0.2322606	150.2	-0.1952813	150.2	-0.2597996	150.2	-0.215842	150.2	-0.2343376	150.2	-0.2316926	150.2	-0.2080907	150.2	-0.1994978	150.2	-0.211324
150.4	0.8020841	150.4	0.7586173	150.4	0.7928044	150.4	0.8244686	150.4	0.779648	150.4	0.8208956	150.4	0.8970438	150.4	-0.2358357	150.4	-0.1930878	150.4	-0.2589274	150.4	-0.2158939	150.4	-0.2354927	150.4	-0.2325576	150.4	-0.2062485	150.4	-0.19901	150.4	-0.2037476
150.6	0.8057756	150.6	0.760558	150.6	0.7966684	150.6	0.8316891	150.6	0.784516	150.6	0.825812	150.6	0.8940837	150.6	-0.2362178	150.6	-0.1946767	150.6	-0.2648448	150.6	-0.2123396	150.6	-0.230435	150.6	-0.2294821	150.6	-0.2071505	150.6	-0.194233	150.6	-0.2072919
150.8	0.8030761	150.8	0.7588134	150.8	0.7951536	150.8	0.8268021	150.8	0.7881856	150.8	0.8253649	150.8	0.8943248	150.8	-0.2355937	150.8	-0.1975159	150.8	-0.2632755	150.8	-0.2126975	150.8	-0.2325478	150.8	-0.2264325	150.8	-0.2103141	150.8	-0.1962534	150.8	-0.2112706
151	0.8073582	151	0.7614207	151	0.7997989	151	0.8314431	151	0.7855842	151	0.8258128	151	0.8976761	151	-0.2297898	151	-0.1966874	151	-0.2596966	151	-0.2142916	151	-0.2326606	151	-0.2268814	151	-0.2063764	151	-0.1948487	151	-0.2068938
151.2	0.8101614	151.2	0.761821	151.2	0.7947239	151.2	0.8300102	151.2	0.7873523	151.2	0.8293043	151.2	0.8945274	151.2	-0.2314282	151.2	-0.1966109	151.2	-0.2563852	151.2	-0.2094787	151.2	-0.2306235	151.2	-0.2308408	151.2	-0.2060052	151.2	-0.2021182	151.2	-0.2062537
151.4	0.8089128	151.4	0.7590779	151.4	0.8020045	151.4	0.8366709	151.4	0.792605	151.4	0.8320782	151.4	0.9029279	151.4	-0.2328878	151.4	-0.1962289	151.4	-0.2568538	151.4	-0.2137534	151.4	-0.2282906	151.4	-0.2302864	151.4	-0.2073175	151.4	-0.1977511	151.4	-0.2088456
151.6	0.8105394	151.6	0.7623965	151.6	0.8000807	151.6	0.8353177	151.6	0.7951227	151.6	0.833998	151.6	0.9034314	151.6	-0.2363466	151.6	-0.1977944	151.6	-0.2611445	151.6	-0.2147964	151.6	-0.2294839	151.6	-0.2276027	151.6	-0.2069173	151.6	-0.1938553	151.6	-0.204328
151.8	0.810822	151.8	0.7668477	151.8	0.8027968	151.8	0.8346161	151.8	0.7899643	151.8	0.8327711	151.8	0.9068817	151.8	-0.2335819	151.8	-0.1939104	151.8	-0.2631908	151.8	-0.2112608	151.8	-0.2311154	151.8	-0.224965	151.8	-0.20773	151.8	-0.198037	151.8	-0.2033656
152	0.8125135	152	0.765864	152	0.8047708	152	0.8384739	152	0.7950875	152	0.8365425	152	0.904279	152	-0.2326218	152	-0.1947209	152	-0.2641802	152	-0.213585	152	-0.2343113	152	-0.2259749	152	-0.2019993	152	-0.1971152	152	-0.2044369
152.2	0.8150192	152.2	0.7700753	152.2	0.8053924	152.2	0.8425437	152.2	0.7986022	152.2	0.8393553	152.2	0.903419	152.2	-0.2353076	152.2	-0.1935121	152.2	-0.2569481	152.2	-0.2134048	152.2	-0.2262322	152.2	-0.2266047	152.2	-0.2111526	152.2	-0.1959906	152.2	-0.1986839
152.4	0.8156876	152.4	0.769749	152.4	0.8050641	152.4	0.8345244	152.4	0.7971848	152.4	0.8363691	152.4	0.9084739	152.4	-0.2299928	152.4	-0.195185	152.4	-0.2647584	152.4	-0.2109016	152.4	-0.2317355	152.4	-0.2301609	152.4	-0.2037365	152.4	-0.1902454	152.4	-0.2021342
152.6	0.8192809	152.6	0.7665267	152.6	0.8070332	152.6	0.8421565	152.6	0.8001808	152.6	0.8385674	152.6	0.9067228	152.6	-0.2334126	152.6	-0.1945807	152.6	-0.2531832	152.6	-0.2097936	152.6	-0.2285221	152.6	-0.2259396	152.6	-0.2048029	152.6	-0.194739	152.6	-0.2091327
152.8	0.8191445	152.8	0.7695708	152.8	0.8089814	152.8	0.8444763	152.8	0.800599	152.8	0.8393319	152.8	0.9115089	152.8	-0.2324698	152.8	-0.19887	152.8	-0.2562413	152.8	-0.2077786	152.8	-0.2313496	152.8	-0.2257634	152.8	-0.2039047	152.8	-0.1914802	152.8	-0.2003895
153	0.8183163	153	0.7761471	153	0.8063555	153	0.8455576	153	0.8025666	153	0.8425555	153	0.9128082	153	-0.2314234	153	-0.1982096	153	-0.2554012	153	-0.2108143	153	-0.2305483	153	-0.2253038	153	-0.2016846	153	-0.194379	153	-0.1989221
153.2	0.8151603	153.2	0.7744262	153.2	0.8127418	153.2	0.8467606	153.2	0.801821	153.2	0.840655	153.2	0.9139999	153.2	-0.230876	153.2	-0.1939632	153.2	-0.2570978	153.2	-0.2148576	153.2	-0.2329244	153.2	-0.2295678	153.2	-0.2010222	153.2	-0.1970582	153.2	-0.2020841
153.4	0.8240123	153.4	0.776405	153.4	0.8119601	153.4	0.8481523	153.4	0.8049577	153.4	0.8440403	153.4	0.9128437	153.4	-0.2285854	153.4	-0.1963242	153.4	-0.260354	153.4	-0.2137939	153.4	-0.2288696	153.4	-0.2248043	153.4	-0.2017582	153.4	-0.1996547	153.4	-0.2045009
153.6	0.8224095	153.6	0.7803558	153.6	0.8141655	153.6	0.8491044	153.6	0.8022512	153.6	0.8473848	153.6	0.9139031	153.6	-0.2330309	153.6	-0.1952773	153.6	-0.257711	153.6	-0.2084757	153.6	-0.2302432	153.6	-0.2266565	153.6	-0.2102663	153.6	-0.1951697	153.6	-0.2016221
153.8	0.8237067	153.8	0.7769198	153.8	0.8140021	153.8	0.8551898	153.8	0.8052979	153.8	0.8452535	153.8	0.9198952	153.8	-0.2322657	153.8	-0.1933151	153.8	-0.2575857	153.8	-0.2112996	153.8	-0.2269002	153.8	-0.2316886	153.8	-0.2038424	153.8	-0.1928242	153.8	-0.2059492
154	0.8256228	154	0.7817639	154	0.8170562	154	0.8527517	154	0.8064856	154	0.8451903	154	0.9204692	154	-0.2353112	154	-0.1959298	154	-0.2619748	154	-0.216371	154	-0.2274823	154	-0.2276316	154	-0.2025199	154	-0.2006207	154	-0.2032517
154.2	0.831692	154.2	0.7790389	154.2	0.815226	154.2	0.855394	154.2	0.8089544	154.2	0.8495165	154.2	0.9199112	154.2	-0.2294627	154.2	-0.1933328	154.2	-0.2570466	154.2	-0.2099748	154.2	-0.2311354	154.2	-0.2250917	154.2	-0.2008907	154.2	-0.1941284	154.2	-0.2003486
154.4	0.8353783	154.4	0.774712	154.4	0.8195987	154.4	0.8540297	154.4	0.8110632	154.4	0.8498929	154.4	0.9216387	154.4	-0.2324254	154.4	-0.1941957	154.4	-0.2595474	154.4	-0.2113545	154.4	-0.2276841	154.4	-0.2256347	154.4	-0.2010101	154.4	-0.1932015	154.4	-0.2022363
154.6	0.8348858	154.6	0.7853076	154.6	0.8215516	154.6	0.8541247	154.6	0.8121904	154.6	0.8491481	154.6	0.9188886	154.6	-0.23265	154.6	-0.1956442	154.6	-0.2584115	154.6	-0.2101786	154.6	-0.2286743	154.6	-0.2241713	154.6	-0.2074839	154.6	-0.195425	154.6	-0.2059564
154.8	0.8314499	154.8	0.7886464	154.8	0.8201132	154.8	0.8585835	154.8	0.8131552	154.8	0.8541629	154.8	0.9228926	154.8	-0.2316853	154.8	-0.1922741	154.8	-0.2555262	154.8	-0.207464	154.8	-0.2290747	154.8	-0.2251788	154.8	-0.2054871	154.8	-0.1943998	154.8	-0.2027205
155	0.8329683	155	0.7833571	155	0.8220092	155	0.8603047	155	0.815928	155	0.8556958	155	0.9227126	155	-0.228421	155	-0.1918322	155	-0.2574447	155	-0.2073782	155	-0.2310873	155	-0.2237174	155	-0.2047071	155	-0.1952106	155	-0.197803
155.2	0.8331721	155.2	0.7925697	155.2	0.8222858	155.2	0.856748	155.2	0.8156186	155.2	0.8558196	155.2	0.9221516	155.2	-0.2265113	155.2	-0.1921051	155.2	-0.2586276	155.2	-0.2111206	155.2	-0.2269417	155.2	-0.2301712	155.2	-0.2033909	155.2	-0.1933567	155.2	-0.2029682
155.4	0.8367158	155.4	0.788731	155.4	0.8274116	155.4	0.8610445	155.4	0.8162599	155.4	0.8561698	155.4	0.9313513	155.4	-0.2260989	155.4	-0.1906346	155.4	-0.2520624	155.4	-0.2105154	155.4	-0.2255608	155.4	-0.2243183	155.4	-0.200505	155.4	-0.1922569	155.4	-0.2012761
155.6	0.8338547	155.6	0.7872389	155.6	0.8292333	155.6	0.8601237	155.6	0.8180076	155.6	0.8565642	155.6	0.9303043	155.6	-0.2246182	155.6	-0.1935563	155.6	-0.258905	155.6	-0.2108499	155.6	-0.2322129	155.6	-0.2290944	155.6	-0.2003769	155.6	-0.1920696	155.6	-0.2022912
155.8	0.8354619	155.8	0.7943299	155.8	0.8312063	155.8	0.8564142	155.8	0.8173172	155.8	0.8581366	155.8	0.9331282	155.8	-0.229215	155.8	-0.196094	155.8	-0.2524419	155.8	-0.2084077	155.8	-0.2279426	155.8	-0.2231106	155.8	-0.2032006	155.8	-0.1903871	155.8	-0.2007761
156	0.8418807	156	0.7915689	156	0.8308229	156	0.8663055	156	0.8198882	156	0.8583167	156	0.9295787	156	-0.2257486	156	-0.1882288	156	-0.2527651	156	-0.2002328	156	-0.2263112	156	-0.2242645	156	-0.2004333	156	-0.188934	156	-0.1960371
156.2	0.841069	156.2	0.7917552	156.2	0.8298603	156.2	0.8666759	156.2	0.8204072	156.2	0.8611553	156.2	0.9282812	156.2	-0.2282258	156.2	-0.191314	156.2	-0.2515586	156.2	-0.204483	156.2	-0.2258146	156.2	-0.2259517	156.2	-0.2050741	156.2	-0.1953532	156.2	-0.1996901
156.4	0.8335555	156.4	0.7980766	156.4	0.8311601	156.4	0.8645389	156.4	0.8261122	156.4	0.8653725	156.4	0.9373994	156.4	-0.230363	156.4	-0.192748	156.4	-0.254024	156.4	-0.2065372	156.4	-0.229925	156.4	-0.222935	156.4	-0.2027099	156.4	-0.190809	156.4	-0.197417
156.6	0.8416495	156.6	0.7952501	156.6	0.8352609	156.6	0.8695938	156.6	0.8253966	156.6	0.8641616	156.6	0.9356773	156.6	-0.23112	156.6	-0.1885431	156.6	-0.2570463	156.6	-0.2107086	156.6	-0.2251858	156.6	-0.2199314	156.6	-0.2011037	156.6	-0.1911609	156.6	-0.2008023
156.8	0.8486935	156.8	0.8019484	156.8	0.8341815	156.8	0.8684686	156.8	0.8251431	156.8	0.8669639	156.8	0.9342919	156.8	-0.2274777	156.8	-0.1888423	156.8	-0.2480516	156.8	-0.2063512	156.8	-0.2197242	156.8	-0.2239628	156.8	-0.2055832	156.8	-0.1853942	156.8	-0.1980411
157	0.8470188	157	0.799095	157	0.8315188	157	0.8655691	157	0.8290289	157	0.8648585	157	0.9380248	157	-0.2260167	157	-0.1913251	157	-0.2506429	157	-0.2100955	157	-0.2287775	157	-0.2223354	157	-0.1992397	157	-0.1918468	157	-0.1950643
157.2	0.8484096	157.2	0.7969053	157.2	0.8348213	157.2	0.8762292	157.2	0.8263223	157.2	0.8694634	157.2	0.9393153	157.2	-0.2272396	157.2	-0.1865312	157.2	-0.2555367	157.2	-0.2106261	157.2	-0.228936	157.2	-0.2238937	157.2	-0.1993242	157.2	-0.1927082	157.2	-0.1996654
157.4	0.8494778	157.4	0.7980704	157.4	0.8428521	157.4	0.8730186	157.4	0.8285944	157.4	0.8715639	157.4	0.9399555	157.4	-0.2249008	157.4	-0.1920926	157.4	-0.2520362	157.4	-0.2055106	157.4	-0.2228355	157.4	-0.2205833	157.4	-0.2003983	157.4	-0.1903207	157.4	-0.200568
157.6	0.850362	157.6	0.8002118	157.6	0.8402174	157.6	0.8699964	157.6	0.8316441	157.6	0.8720026	157.6	0.9395117	157.6	-0.2281719	157.6	-0.1944532	157.6	-0.2567731	157.6	-0.2038042	157.6	-0.2273732	157.6	-0.2220136	157.6	-0.1967979	157.6	-0.1893511	157.6	-0.200709
157.8	0.8513923	157.8	0.8014255	157.8	0.8456229	157.8	0.8770958	157.8	0.8362573	157.8	0.8688971	157.8	0.941484	157.8	-0.2289275	157.8	-0.1893094	157.8	-0.2531766	157.8	-0.2109029	157.8	-0.2305318	157.8	-0.2206693	157.8	-0.2027021	157.8	-0.1894708	157.8	-0.2005224
158	0.850786	158	0.8049183	158	0.8428449	158	0.8790752	158	0.8348316	158	0.8694947	158	0.9429553	158	-0.2239367	158	-0.1936287	158	-0.2521656	158	-0.2056355	158	-0.2218721	158	-0.2198106	158	-0.200227	158	-0.1905477	158	-0.1980815
158.2	0.8495972	158.2	0.80204	158.2	0.8413707	158.2	0.8795624	158.2	0.8340221	158.2	0.8729281	158.2	0.9462272	158.2	-0.2266556	158.2	-0.1878764	158.2	-0.2537889	158.2	-0.2046209	158.2	-0.2279258	158.2	-0.2220951	158.2	-0.2041129	158.2	-0.1921898	158.2	-0.1957676
158.4	0.8523846	158.4	0.8088424	158.4	0.8386239	158.4	0.8786679	158.4	0.8311831	158.4	0.8741727	158.4	0.9467314	158.4	-0.2229628	158.4	-0.1897322	158.4	-0.2564286	158.4	-0.2089089	158.4	-0.2255343	158.4	-0.2215606	158.4	-0.2005194	158.4	-0.1868997	158.4	-0.1990505
158.6	0.8485742	158.6	0.8050177	158.6	0.8457749	158.6	0.8774591	158.6	0.8343422	158.6	0.8745846	158.6	0.9455889	158.6	-0.2309165	158.6	-0.1883123	158.6	-0.2532088	158.6	-0.2058114	158.6	-0.2253857	158.6	-0.2204565	158.6	-0.2006883	158.6	-0.191563	158.6	-0.1970168
158.8	0.8517415	158.8	0.8061575	158.8	0.8437761	158.8	0.8835987	158.8	0.8400419	158.8	0.8761649	158.8	0.9511657	158.8	-0.2275923	158.8	-0.1906867	158.8	-0.250857	158.8	-0.2046118	158.8	-0.2262603	158.8	-0.2199653	158.8	-0.1982746	158.8	-0.1859305	158.8	-0.1954713
159	0.8531439	159	0.8053741	159	0.8483262	159	0.8811268	159	0.8370783	159	0.8788708	159	0.9497974	159	-0.2259535	159	-0.1900651	159	-0.2497154	159	-0.2058363	159	-0.2205641	159	-0.2221752	159	-0.1998148	159	-0.1846805	159	-0.1954567
159.2	0.8558933	159.2	0.8128852	159.2	0.8491781	159.2	0.8841708	159.2	0.8427737	159.2	0.8761761	159.2	0.9469326	159.2	-0.2268556	159.2	-0.1908841	159.2	-0.2517982	159.2	-0.204467	159.2	-0.2249089	159.2	-0.2213254	159.2	-0.1997754	159.2	-0.1900779	159.2	-0.1982323
159.4	0.8515088	159.4	0.8128469	159.4	0.8463373	159.4	0.8903901	159.4	0.8415706	159.4	0.8767008	159.4	0.9534391	159.4	-0.2280047	159.4	-0.1880741	159.4	-0.2486896	159.4	-0.2060264	159.4	-0.2199394	159.4	-0.221145	159.4	-0.2002898	159.4	-0.1902026	159.4	-0.1944111
159.6	0.8591063	159.6	0.8132082	159.6	0.850412	159.6	0.8894085	159.6	0.8437188	159.6	0.8796556	159.6	0.9577789	159.6	-0.226827	159.6	-0.1869459	159.6	-0.2476583	159.6	-0.2045874	159.6	-0.2274768	159.6	-0.2221276	159.6	-0.1971497	159.6	-0.1865277	159.6	-0.1971938
159.8	0.862091	159.8	0.814755	159.8	0.8507438	159.8	0.8910056	159.8	0.8415489	159.8	0.881345	159.8	0.9538321	159.8	-0.221227	159.8	-0.1893268	159.8	-0.2476865	159.8	-0.2033147	159.8	-0.2234799	159.8	-0.2248231	159.8	-0.2002203	159.8	-0.1819462	159.8	-0.1937168
160	0.8592947	160	0.8108096	160	0.8536617	160	0.8920395	160	0.8439131	160	0.8854937	160	0.9528049	160	-0.2240602	160	-0.1831834	160	-0.249344	160	-0.2032504	160	-0.2208255	160	-0.2187122	160	-0.1984776	160	-0.1902642	160	-0.2019039
160.2	0.8604451	160.2	0.8095838	160.2	0.8578501	160.2	0.8943896	160.2	0.8442392	160.2	0.8891312	160.2	0.955983	160.2	-0.2247497	160.2	-0.1866479	160.2	-0.2473251	160.2	-0.2037265	160.2	-0.2228929	160.2	-0.219728	160.2	-0.197099	160.2	-0.1863838	160.2	-0.1964678
160.4	0.8627369	160.4	0.8223267	160.4	0.8551239	160.4	0.8943296	160.4	0.8498195	160.4	0.8880556	160.4	0.9599801	160.4	-0.2229356	160.4	-0.1865768	160.4	-0.2532305	160.4	-0.2025667	160.4	-0.2239605	160.4	-0.2179712	160.4	-0.1965935	160.4	-0.1852427	160.4	-0.1913007
160.6	0.8604817	160.6	0.8182788	160.6	0.8536289	160.6	0.8927114	160.6	0.8476699	160.6	0.888705	160.6	0.9601578	160.6	-0.2233828	160.6	-0.1870959	160.6	-0.2488364	160.6	-0.2040739	160.6	-0.2202761	160.6	-0.222217	160.6	-0.1955915	160.6	-0.1858176	160.6	-0.1992537
160.8	0.8645627	160.8	0.8214493	160.8	0.8560613	160.8	0.8975816	160.8	0.8506807	160.8	0.8914964	160.8	0.9581988	160.8	-0.2220522	160.8	-0.1887097	160.8	-0.2501884	160.8	-0.2006973	160.8	-0.2199592	160.8	-0.2199537	160.8	-0.1948374	160.8	-0.1887416	160.8	-0.1961166
161	0.8669987	161	0.8197566	161	0.8581961	161	0.896831	161	0.8508327	161	0.892377	161	0.9636685	161	-0.221551	161	-0.1869537	161	-0.2474131	161	-0.2061969	161	-0.216048	161	-0.2228859	161	-0.1943949	161	-0.1921147	161	-0.197617
161.2	0.8675842	161.2	0.8215912	161.2	0.8629781	161.2	0.8955792	161.2	0.8499951	161.2	0.8958074	161.2	0.9576427	161.2	-0.2249248	161.2	-0.1838318	161.2	-0.2436924	161.2	-0.2011654	161.2	-0.2302596	161.2	-0.2194748	161.2	-0.1956114	161.2	-0.1874769	161.2	-0.197241
161.4	0.8726993	161.4	0.8254318	161.4	0.8650002	161.4	0.8965741	161.4	0.8546436	161.4	0.8910991	161.4	0.9640293	161.4	-0.2190192	161.4	-0.1859073	161.4	-0.252269	161.4	-0.2031916	161.4	-0.2160328	161.4	-0.2193972	161.4	-0.1968196	161.4	-0.1870468	161.4	-0.1935961
161.6	0.8713343	161.6	0.8262633	161.6	0.8598788	161.6	0.8988611	161.6	0.8523296	161.6	0.8946062	161.6	0.9644957	161.6	-0.2261765	161.6	-0.1841082	161.6	-0.2462496	161.6	-0.2051603	161.6	-0.2226513	161.6	-0.2210164	161.6	-0.193233	161.6	-0.1849593	161.6	-0.1966036
161.8	0.8717483	161.8	0.828171	161.8	0.8623378	161.8	0.8983839	161.8	0.8531289	161.8	0.8904015	161.8	0.9662036	161.8	-0.219482	161.8	-0.1872543	161.8	-0.2481147	161.8	-0.1998773	161.8	-0.2249897	161.8	-0.2194685	161.8	-0.1995532	161.8	-0.188633	161.8	-0.1948141
162	0.8750667	162	0.8262308	162	0.8627672	162	0.900871	162	0.8571659	162	0.8995423	162	0.9678667	162	-0.222212	162	-0.1834823	162	-0.2479412	162	-0.2024402	162	-0.220538	162	-0.2174799	162	-0.1947495	162	-0.1853644	162	-0.1932202
162.2	0.8777304	162.2	0.8275432	162.2	0.8639235	162.2	0.9087761	162.2	0.8616502	162.2	0.8933271	162.2	0.9711936	162.2	-0.2233343	162.2	-0.1807552	162.2	-0.2442753	162.2	-0.1998498	162.2	-0.21909	162.2	-0.2165303	162.2	-0.1946564	162.2	-0.1858554	162.2	-0.1976788
162.4	0.8722888	162.4	0.8296887	162.4	0.8660014	162.4	0.9038215	162.4	0.8541499	162.4	0.8969821	162.4	0.971965	162.4	-0.2233018	162.4	-0.1859744	162.4	-0.2503101	162.4	-0.2014693	162.4	-0.2202365	162.4	-0.2180267	162.4	-0.1943801	162.4	-0.1849813	162.4	-0.1956961
162.6	0.8749213	162.6	0.8305572	162.6	0.8668493	162.6	0.9082176	162.6	0.8590026	162.6	0.9033288	162.6	0.9743223	162.6	-0.2223737	162.6	-0.1825782	162.6	-0.2474429	162.6	-0.2010579	162.6	-0.2213658	162.6	-0.2178131	162.6	-0.1949432	162.6	-0.1837102	162.6	-0.1963162
162.8	0.8796934	162.8	0.8320287	162.8	0.8695502	162.8	0.9078454	162.8	0.8647027	162.8	0.9013512	162.8	0.9695984	162.8	-0.220369	162.8	-0.1839043	162.8	-0.2467473	162.8	-0.1985644	162.8	-0.2184823	162.8	-0.2185347	162.8	-0.1950963	162.8	-0.1849317	162.8	-0.192011
163	0.8786475	163	0.8348797	163	0.8700637	163	0.9082028	163	0.860941	163	0.8989865	163	0.973406	163	-0.2216247	163	-0.1828393	163	-0.2507843	163	-0.2034535	163	-0.2172024	163	-0.2198358	163	-0.197029	163	-0.1868832	163	-0.1976845
163.2	0.878141	163.2	0.8360085	163.2	0.8653	163.2	0.9039155	163.2	0.8660994	163.2	0.9014624	163.2	0.9762132	163.2	-0.2197224	163.2	-0.188741	163.2	-0.2463336	163.2	-0.2031553	163.2	-0.2203598	163.2	-0.2196905	163.2	-0.1964982	163.2	-0.1834152	163.2	-0.1942602
163.4	0.8811069	163.4	0.8325224	163.4	0.8693324	163.4	0.903865	163.4	0.866255	163.4	0.9044078	163.4	0.9794044	163.4	-0.2184643	163.4	-0.1832395	163.4	-0.2457028	163.4	-0.199454	163.4	-0.218973	163.4	-0.2159753	163.4	-0.1944015	163.4	-0.1868088	163.4	-0.1973911
163.6	0.884567	163.6	0.8355916	163.6	0.871093	163.6	0.9112156	163.6	0.8590773	163.6	0.9047419	163.6	0.9774692	163.6	-0.2228685	163.6	-0.1837911	163.6	-0.2466597	163.6	-0.1962155	163.6	-0.2185171	163.6	-0.2168692	163.6	-0.1943006	163.6	-0.1854222	163.6	-0.1942296
163.8	0.8839322	163.8	0.8322319	163.8	0.8727806	163.8	0.9150035	163.8	0.8694691	163.8	0.9052274	163.8	0.9752695	163.8	-0.2227865	163.8	-0.1814428	163.8	-0.2498956	163.8	-0.1979002	163.8	-0.2217125	163.8	-0.2178852	163.8	-0.1934281	163.8	-0.183449	163.8	-0.1930645
164	0.884264	164	0.838797	164	0.8726074	164	0.9127846	164	0.8668907	164	0.9079828	164	0.9794579	164	-0.2192197	164	-0.1884765	164	-0.2403758	164	-0.1975836	164	-0.2179768	164	-0.2143524	164	-0.1942004	164	-0.1848862	164	-0.1955042
164.2	0.8821579	164.2	0.8361974	164.2	0.8741351	164.2	0.9127198	164.2	0.8689772	164.2	0.9114011	164.2	0.9806626	164.2	-0.2235495	164.2	-0.1799361	164.2	-0.2442623	164.2	-0.1986542	164.2	-0.215807	164.2	-0.2126411	164.2	-0.1930176	164.2	-0.1855516	164.2	-0.1927098
164.4	0.8876668	164.4	0.8396019	164.4	0.8751617	164.4	0.9159399	164.4	0.8652469	164.4	0.9115224	164.4	0.9838005	164.4	-0.2199395	164.4	-0.1839732	164.4	-0.2468542	164.4	-0.1976486	164.4	-0.2204845	164.4	-0.2169963	164.4	-0.1929687	164.4	-0.1823352	164.4	-0.1973089
164.6	0.8852659	164.6	0.842548	164.6	0.8803835	164.6	0.9126641	164.6	0.8711691	164.6	0.9136423	164.6	0.983313	164.6	-0.2182213	164.6	-0.1800153	164.6	-0.2462838	164.6	-0.1993027	164.6	-0.2159083	164.6	-0.2132723	164.6	-0.1918932	164.6	-0.1844878	164.6	-0.1964201
164.8	0.8829643	164.8	0.8436808	164.8	0.8820153	164.8	0.9164321	164.8	0.8683082	164.8	0.9090528	164.8	0.9865111	164.8	-0.2147544	164.8	-0.1808788	164.8	-0.2449246	164.8	-0.1988207	164.8	-0.2188735	164.8	-0.2099917	164.8	-0.192166	164.8	-0.1847157	164.8	-0.193704
165	0.8871865	165	0.8409943	165	0.8842885	165	0.9164692	165	0.8708491	165	0.9142205	165	0.9853204	165	-0.2211163	165	-0.1788469	165	-0.2507328	165	-0.1998799	165	-0.2167391	165	-0.2166243	165	-0.1920909	165	-0.1801839	165	-0.1927197
165.2	0.8881598	165.2	0.8425127	165.2	0.8792145	165.2	0.916503	165.2	0.8708779	165.2	0.9138017	165.2	0.9857341	165.2	-0.2165907	165.2	-0.1839052	165.2	-0.2416126	165.2	-0.1991715	165.2	-0.2196247	165.2	-0.2134364	165.2	-0.1941418	165.2	-0.1803883	165.2	-0.1891634
165.4	0.8881311	165.4	0.8456856	165.4	0.8799418	165.4	0.9136785	165.4	0.875397	165.4	0.9126145	165.4	0.988281	165.4	-0.2212586	165.4	-0.1821497	165.4	-0.2456904	165.4	-0.1948102	165.4	-0.2170095	165.4	-0.2142205	165.4	-0.1904487	165.4	-0.1793708	165.4	-0.1932006
165.6	0.8894067	165.6	0.8467611	165.6	0.8811498	165.6	0.9223542	165.6	0.8715545	165.6	0.916293	165.6	0.9867507	165.6	-0.2179416	165.6	-0.1807844	165.6	-0.2478579	165.6	-0.2027485	165.6	-0.2145421	165.6	-0.2127732	165.6	-0.1944724	165.6	-0.1816801	165.6	-0.1926001
165.8	0.8903523	165.8	0.8483158	165.8	0.8875901	165.8	0.9213331	165.8	0.8791262	165.8	0.9174004	165.8	0.9887906	165.8	-0.2173897	165.8	-0.1846741	165.8	-0.2466647	165.8	-0.1978037	165.8	-0.2180685	165.8	-0.2128418	165.8	-0.1960955	165.8	-0.1846658	165.8	-0.1940209
166	0.8961148	166	0.8494653	166	0.8864782	166	0.9211648	166	0.8743493	166	0.9178736	166	0.993858	166	-0.2190288	166	-0.181658	166	-0.2438859	166	-0.2015404	166	-0.2167018	166	-0.2144242	166	-0.1922953	166	-0.1823603	166	-0.1868218
166.2	0.8900505	166.2	0.8514917	166.2	0.8909833	166.2	0.9227787	166.2	0.8771948	166.2	0.9188157	166.2	0.9908319	166.2	-0.215676	166.2	-0.1796065	166.2	-0.2469545	166.2	-0.1926523	166.2	-0.2197663	166.2	-0.2152478	166.2	-0.1903905	166.2	-0.1834409	166.2	-0.1948315
166.4	0.8985136	166.4	0.849245	166.4	0.8938002	166.4	0.9273493	166.4	0.8780205	166.4	0.9212594	166.4	0.9922072	166.4	-0.2128387	166.4	-0.1820515	166.4	-0.2512172	166.4	-0.1992209	166.4	-0.2169737	166.4	-0.2124696	166.4	-0.1952745	166.4	-0.1786424	166.4	-0.1922249
166.6	0.8945553	166.6	0.8548455	166.6	0.8873839	166.6	0.9288684	166.6	0.878941	166.6	0.9234171	166.6	0.9894137	166.6	-0.2176609	166.6	-0.1808964	166.6	-0.2457069	166.6	-0.1951414	166.6	-0.2178883	166.6	-0.2138383	166.6	-0.189125	166.6	-0.1838872	166.6	-0.1898252
166.8	0.9001837	166.8	0.8520319	166.8	0.8918431	166.8	0.9293893	166.8	0.8790848	166.8	0.9211783	166.8	0.9940345	166.8	-0.2155824	166.8	-0.1793323	166.8	-0.2433953	166.8	-0.1985538	166.8	-0.2185226	166.8	-0.211956	166.8	-0.1944715	166.8	-0.1835777	166.8	-0.1888059
167	0.8957328	167	0.850084	167	0.8938147	167	0.9281694	167	0.883255	167	0.9226506	167	0.9924514	167	-0.2136694	167	-0.1792637	167	-0.2425784	167	-0.1990411	167	-0.2125822	167	-0.2169436	167	-0.1903887	167	-0.1768482	167	-0.1904512
167.2	0.9007014	167.2	0.8568336	167.2	0.8891221	167.2	0.9273607	167.2	0.8813834	167.2	0.9248461	167.2	0.9937375	167.2	-0.2135884	167.2	-0.1788403	167.2	-0.2461557	167.2	-0.1996042	167.2	-0.2204399	167.2	-0.2136029	167.2	-0.1897547	167.2	-0.1831228	167.2	-0.191023
167.4	0.8998336	167.4	0.8596984	167.4	0.896506	167.4	0.9268277	167.4	0.8866972	167.4	0.9249774	167.4	0.9974992	167.4	-0.2175786	167.4	-0.1796562	167.4	-0.2447386	167.4	-0.2007025	167.4	-0.2200412	167.4	-0.2128128	167.4	-0.1931232	167.4	-0.1791606	167.4	-0.190532
167.6	0.9008467	167.6	0.8565134	167.6	0.8942179	167.6	0.9302815	167.6	0.8876851	167.6	0.9291286	167.6	0.9969671	167.6	-0.2201265	167.6	-0.1792405	167.6	-0.2451052	167.6	-0.1948527	167.6	-0.213935	167.6	-0.2125809	167.6	-0.191644	167.6	-0.1814284	167.6	-0.1907122
167.8	0.9066261	167.8	0.8586744	167.8	0.8967164	167.8	0.9323843	167.8	0.8842571	167.8	0.9261256	167.8	0.9973197	167.8	-0.2163448	167.8	-0.1816283	167.8	-0.2433838	167.8	-0.1972347	167.8	-0.2161156	167.8	-0.2075705	167.8	-0.1897512	167.8	-0.1797255	167.8	-0.1923983
168	0.8987709	168	0.8567885	168	0.8953825	168	0.9337206	168	0.888445	168	0.9241122	168	0.9995241	168	-0.2156403	168	-0.1784107	168	-0.2434677	168	-0.1958867	168	-0.2168853	168	-0.2121598	168	-0.1927957	168	-0.1799595	168	-0.1850361
168.2	0.9065247	168.2	0.8600305	168.2	0.8946278	168.2	0.9399041	168.2	0.8887603	168.2	0.9337271	168.2	0.9991912	168.2	-0.2177301	168.2	-0.1837082	168.2	-0.2432642	168.2	-0.1965234	168.2	-0.2192642	168.2	-0.2132078	168.2	-0.1874229	168.2	-0.1804882	168.2	-0.1900173
168.4	0.9070668	168.4	0.8546028	168.4	0.8994732	168.4	0.938924	168.4	0.8890939	168.4	0.9302557	168.4	1.000883	168.4	-0.2134456	168.4	-0.1794477	168.4	-0.240451	168.4	-0.1942817	168.4	-0.21549	168.4	-0.2095392	168.4	-0.1861729	168.4	-0.1803062	168.4	-0.1918583
168.6	0.9072397	168.6	0.8645468	168.6	0.8997374	168.6	0.9367666	168.6	0.8882313	168.6	0.93341	168.6	1.00133	168.6	-0.2149646	168.6	-0.1775077	168.6	-0.2456453	168.6	-0.1946316	168.6	-0.2147187	168.6	-0.2112529	168.6	-0.1887602	168.6	-0.1807954	168.6	-0.1935115
168.8	0.9106377	168.8	0.8626741	168.8	0.8965176	168.8	0.9394265	168.8	0.8907114	168.8	0.9320464	168.8	1.006249	168.8	-0.2171949	168.8	-0.1758059	168.8	-0.2422489	168.8	-0.1944735	168.8	-0.2121	168.8	-0.2133814	168.8	-0.1868456	168.8	-0.1790535	168.8	-0.191125
169	0.907484	169	0.8667294	169	0.8978884	169	0.938037	169	0.8919023	169	0.9333426	169	1.002559	169	-0.2134421	169	-0.1825005	169	-0.243964	169	-0.1967742	169	-0.2115021	169	-0.2108882	169	-0.1921947	169	-0.182448	169	-0.1871214
169.2	0.9113498	169.2	0.8707959	169.2	0.9090097	169.2	0.9408146	169.2	0.8942176	169.2	0.9379892	169.2	1.008821	169.2	-0.2200019	169.2	-0.1772435	169.2	-0.2409489	169.2	-0.1988945	169.2	-0.2135982	169.2	-0.2133356	169.2	-0.1907996	169.2	-0.1779228	169.2	-0.1863849
169.4	0.9122117	169.4	0.8669939	169.4	0.9048555	169.4	0.9464884	169.4	0.8907554	169.4	0.9383373	169.4	1.005857	169.4	-0.2093493	169.4	-0.1788541	169.4	-0.2411952	169.4	-0.1940033	169.4	-0.2132007	169.4	-0.2115425	169.4	-0.1886899	169.4	-0.181078	169.4	-0.1912732
169.6	0.9127529	169.6	0.8701358	169.6	0.9012836	169.6	0.9415535	169.6	0.8986657	169.6	0.9384855	169.6	1.007445	169.6	-0.214148	169.6	-0.1796692	169.6	-0.2416399	169.6	-0.1960461	169.6	-0.2116813	169.6	-0.2087388	169.6	-0.1872968	169.6	-0.1797501	169.6	-0.1903922
169.8	0.9134572	169.8	0.8657421	169.8	0.9049213	169.8	0.942345	169.8	0.8977358	169.8	0.9385145	169.8	1.008557	169.8	-0.2151576	169.8	-0.1796757	169.8	-0.2394384	169.8	-0.1966327	169.8	-0.2145325	169.8	-0.2105358	169.8	-0.189256	169.8	-0.1809779	169.8	-0.1912939
170	0.9501716	170	0.9087968	170	0.9467351	170	0.9859005	170	0.9325674	170	0.9762422	170	1.044678	170	-0.220324	170	-0.1792744	170	-0.2453735	170	-0.1950641	170	-0.2163899	170	-0.2133334	170	-0.1854065	170	-0.1767545	170	-0.189649
170.2	0.9571765	170.2	0.9119232	170.2	0.9499739	170.2	0.986313	170.2	0.9361619	170.2	0.9829057	170.2	1.047964	170.2	-0.2132004	170.2	-0.1765022	170.2	-0.2401924	170.2	-0.1966747	170.2	-0.2092006	170.2	-0.2128169	170.2	-0.1870645	170.2	-0.1788274	170.2	-0.1905938
170.4	0.9574055	170.4	0.9123079	170.4	0.9544448	170.4	0.9891793	170.4	0.9398379	170.4	0.9802302	170.4	1.049636	170.4	-0.2145845	170.4	-0.1739816	170.4	-0.2416908	170.4	-0.1916328	170.4	-0.2128897	170.4	-0.2099117	170.4	-0.1909706	170.4	-0.1818583	170.4	-0.185983
170.6	0.9563956	170.6	0.9168954	170.6	0.9528021	170.6	0.9896362	170.6	0.940789	170.6	0.9836573	170.6	1.050654	170.6	-0.2177276	170.6	-0.1823188	170.6	-0.2423388	170.6	-0.1928533	170.6	-0.2144722	170.6	-0.2079635	170.6	-0.1912104	170.6	-0.1738059	170.6	-0.1871928
170.8	0.9627032	170.8	0.9128354	170.8	0.9542994	170.8	0.9896996	170.8	0.9427471	170.8	0.983501	170.8	1.055186	170.8	-0.2150785	170.8	-0.1756134	170.8	-0.2341232	170.8	-0.1921174	170.8	-0.2104675	170.8	-0.2055259	170.8	-0.188288	170.8	-0.1769566	170.8	-0.1878327
171	0.9533144	171	0.9165375	171	0.955781	171	0.9922031	171	0.9470968	171	0.9858463	171	1.050097	171	-0.2128876	171	-0.1814695	171	-0.2447049	171	-0.1903166	171	-0.2136053	171	-0.2096783	171	-0.184038	171	-0.1768184	171	-0.1894807
171.2	0.9654858	171.2	0.9149094	171.2	0.9559061	171.2	0.9863273	171.2	0.9401786	171.2	0.9898406	171.2	1.052505	171.2	-0.2130585	171.2	-0.1728111	171.2	-0.2374299	171.2	-0.1876164	171.2	-0.211177	171.2	-0.2038948	171.2	-0.1866437	171.2	-0.1800475	171.2	-0.1895939
171.4	0.9633093	171.4	0.9170043	171.4	0.9581264	171.4	0.9925377	171.4	0.9480723	171.4	0.9906733	171.4	1.054942	171.4	-0.2145299	171.4	-0.1746169	171.4	-0.2409367	171.4	-0.1929993	171.4	-0.2084918	171.4	-0.2053576	171.4	-0.1894127	171.4	-0.1750346	171.4	-0.1903797
171.6	0.9652928	171.6	0.9211058	171.6	0.9552436	171.6	0.9919258	171.6	0.9515818	171.6	0.987816	171.6	1.056872	171.6	-0.2136015	171.6	-0.1736155	171.6	-0.2337509	171.6	-0.1928368	171.6	-0.2090979	171.6	-0.2060589	171.6	-0.1902681	171.6	-0.1752922	171.6	-0.1865188
171.8	0.9594356	171.8	0.9142157	171.8	0.9588482	171.8	0.990645	171.8	0.9454374	171.8	0.9891402	171.8	1.057933	171.8	-0.2147017	171.8	-0.1802127	171.8	-0.2376569	171.8	-0.1945228	171.8	-0.2086418	171.8	-0.2074431	171.8	-0.1917533	171.8	-0.1771329	171.8	-0.1903739
172	0.9661106	172	0.9174473	172	0.9596085	172	0.9956806	172	0.9472353	172	0.9954541	172	1.0556	172	-0.2121073	172	-0.1735626	172	-0.2410104	172	-0.1926454	172	-0.2117359	172	-0.2102479	172	-0.1862184	172	-0.1747523	172	-0.1845839
172.2	0.9642093	172.2	0.9237431	172.2	0.9616821	172.2	0.9987015	172.2	0.9462302	172.2	0.9847044	172.2	1.055617	172.2	-0.210654	172.2	-0.1701084	172.2	-0.240751	172.2	-0.1917913	172.2	-0.210059	172.2	-0.210778	172.2	-0.1857272	172.2	-0.1743432	172.2	-0.1848013
172.4	0.964621	172.4	0.9192571	172.4	0.9599499	172.4	0.998984	172.4	0.9486851	172.4	0.9923652	172.4	1.059923	172.4	-0.2128507	172.4	-0.1771759	172.4	-0.236171	172.4	-0.1941306	172.4	-0.2072762	172.4	-0.2073647	172.4	-0.1872852	172.4	-0.1745557	172.4	-0.1853992
172.6	0.9677711	172.6	0.9186026	172.6	0.9593725	172.6	0.9968012	172.6	0.9477076	172.6	0.9921704	172.6	1.059894	172.6	-0.2105366	172.6	-0.1775718	172.6	-0.2395038	172.6	-0.19356	172.6	-0.2132183	172.6	-0.2071503	172.6	-0.1868335	172.6	-0.1757681	172.6	-0.1843269
172.8	0.9622868	172.8	0.9234716	172.8	0.9615194	172.8	0.9961547	172.8	0.9525496	172.8	0.9881383	172.8	1.057647	172.8	-0.2138879	172.8	-0.1780591	172.8	-0.2356011	172.8	-0.1893243	172.8	-0.2097233	172.8	-0.2073175	172.8	-0.1842465	172.8	-0.1775452	172.8	-0.1817642
173	0.9673371	173	0.9204966	173	0.9631201	173	0.9975798	173	0.9457078	173	0.9900743	173	1.056765	173	-0.2075905	173	-0.1746299	173	-0.2366427	173	-0.1954567	173	-0.2103862	173	-0.2066483	173	-0.1859087	173	-0.1739046	173	-0.1853802
173.2	0.9626678	173.2	0.9202974	173.2	0.960878	173.2	0.9960859	173.2	0.951492	173.2	0.9950762	173.2	1.060628	173.2	-0.2111859	173.2	-0.1764676	173.2	-0.2385261	173.2	-0.1880403	173.2	-0.2070558	173.2	-0.2057387	173.2	-0.187107	173.2	-0.1793247	173.2	-0.1887124
173.4	0.96624	173.4	0.9248073	173.4	0.958073	173.4	0.9994474	173.4	0.9441877	173.4	0.9900451	173.4	1.058065	173.4	-0.212534	173.4	-0.1710955	173.4	-0.2388668	173.4	-0.1871164	173.4	-0.2080831	173.4	-0.2105971	173.4	-0.1863739	173.4	-0.173855	173.4	-0.1864118
173.6	0.9649266	173.6	0.9252831	173.6	0.9628602	173.6	0.9950039	173.6	0.9564835	173.6	0.9887337	173.6	1.058138	173.6	-0.2097866	173.6	-0.1744238	173.6	-0.2386109	173.6	-0.1882048	173.6	-0.2039108	173.6	-0.2104723	173.6	-0.1850342	173.6	-0.1758137	173.6	-0.1901451
173.81	0.9672014	173.81	0.9182628	173.81	0.9639397	173.81	1.001731	173.81	0.9477705	173.81	0.9947756	173.81	1.056703	173.81	-0.2068457	173.8	-0.1746881	173.8	-0.2321345	173.8	-0.189612	173.8	-0.2076299	173.8	-0.2019693	173.8	-0.1878492	173.8	-0.1684684	173.8	-0.1821998
174	0.9634092	174	0.9230061	174	0.9604191	174	0.996585	174	0.9505193	174	0.9953197	174	1.058047	174	-0.210687	174	-0.173791	174	-0.2378351	174	-0.1901316	174	-0.2097475	174	-0.2073802	174	-0.185395	174	-0.1747416	174	-0.1864476
174.2	0.9622345	174.2	0.9260918	174.2	0.9661683	174.2	0.9998356	174.2	0.9503542	174.2	0.9943842	174.2	1.059858	174.2	-0.2145295	174.2	-0.1713752	174.2	-0.2392581	174.2	-0.1883772	174.2	-0.2047525	174.2	-0.2023938	174.2	-0.1837172	174.2	-0.1717054	174.2	-0.184668
174.4	0.9666357	174.4	0.9243459	174.4	0.9635127	174.4	1.001221	174.4	0.9524463	174.4	0.9901291	174.4	1.063733	174.4	-0.2067117	174.4	-0.1704646	174.4	-0.2353652	174.4	-0.1912592	174.4	-0.2085126	174.4	-0.2062899	174.4	-0.183034	174.4	-0.1751105	174.4	-0.1866038
174.6	0.9711751	174.6	0.9201101	174.6	0.9608926	174.6	1.003752	174.6	0.952964	174.6	0.9935302	174.6	1.063342	174.6	-0.2092114	174.6	-0.1775538	174.6	-0.2335804	174.6	-0.191379	174.6	-0.2068539	174.6	-0.2052854	174.6	-0.1861298	174.6	-0.1738134	174.6	-0.1861152
174.8	0.9651923	174.8	0.9244566	174.8	0.9642837	174.8	0.9987211	174.8	0.9521712	174.8	0.9958279	174.8	1.056493	174.8	-0.2069477	174.8	-0.1758194	174.8	-0.2359959	174.8	-0.1915669	174.8	-0.2079526	174.8	-0.2088829	174.8	-0.1841745	174.8	-0.1754551	174.8	-0.1808313
175	0.9698901	175	0.9237143	175	0.9640158	175	1.003361	175	0.9475452	175	0.9940363	175	1.059777	175	-0.2114566	175	-0.177202	175	-0.2377131	175	-0.1873818	175	-0.2119374	175	-0.2042105	175	-0.1829907	175	-0.1705258	175	-0.1820995
175.2	0.9666662	175.2	0.9251903	175.2	0.9650391	175.2	1.002234	175.2	0.9502864	175.2	0.9967673	175.2	1.05715	175.2	-0.2055032	175.2	-0.168881	175.2	-0.2344918	175.2	-0.1936228	175.2	-0.2083769	175.2	-0.2001454	175.2	-0.1826059	175.2	-0.1730778	175.2	-0.1847659
175.4	0.9668437	175.4	0.9272938	175.4	0.9627587	175.4	0.9988288	175.4	0.952612	175.4	0.9968767	175.4	1.064225	175.4	-0.2131727	175.4	-0.1778961	175.4	-0.2342075	175.4	-0.186917	175.4	-0.2031732	175.4	-0.2077596	175.4	-0.1801389	175.4	-0.1731578	175.4	-0.1804695
175.6	0.9660694	175.6	0.9226164	175.6	0.9616711	175.6	1.001603	175.6	0.9493364	175.6	0.9946464	175.6	1.065516	175.6	-0.2067274	175.6	-0.1738994	175.6	-0.2382575	175.6	-0.1890349	175.6	-0.2107441	175.6	-0.2031701	175.6	-0.1789276	175.6	-0.1730636	175.6	-0.1846643
175.8	0.9659081	175.8	0.9269012	175.8	0.9646682	175.8	1.000166	175.8	0.9574876	175.8	0.9970551	175.8	1.060881	175.8	-0.2076713	175.8	-0.1737756	175.8	-0.2328627	175.8	-0.1867642	175.8	-0.2051404	175.8	-0.2027974	175.8	-0.1793669	175.8	-0.1765676	175.8	-0.1827978
176	0.9676055	176	0.9213951	176	0.9590012	176	1.004583	176	0.9551209	176	0.995822	176	1.065099	176	-0.2102811	176	-0.1712131	176	-0.2341417	176	-0.187979	176	-0.2110361	176	-0.1968849	176	-0.1788201	176	-0.1762561	176	-0.1816472
176.2	0.9679665	176.2	0.9265694	176.2	0.9656829	176.2	1.006096	176.2	0.9547952	176.2	0.9966395	176.2	1.063636	176.2	-0.2104399	176.2	-0.1693181	176.2	-0.2371005	176.2	-0.1885147	176.2	-0.2099077	176.2	-0.2012978	176.2	-0.1813446	176.2	-0.1726048	176.2	-0.1824541
176.4	0.9747148	176.4	0.9258947	176.4	0.9640058	176.4	1.007342	176.4	0.9522098	176.4	0.995502	176.4	1.067909	176.4	-0.2056698	176.4	-0.1730297	176.4	-0.2355178	176.4	-0.1859141	176.4	-0.2059692	176.4	-0.2046164	176.4	-0.1805784	176.4	-0.1737384	176.4	-0.1848807
176.6	0.9694684	176.6	0.925824	176.6	0.9636757	176.6	1.00194	176.6	0.9568912	176.6	1.001905	176.6	1.064266	176.6	-0.2089989	176.6	-0.1732196	176.6	-0.2348271	176.6	-0.1901472	176.6	-0.2074222	176.6	-0.2005215	176.6	-0.1846992	176.6	-0.171485	176.6	-0.1798482
176.8	0.9685911	176.8	0.9284458	176.8	0.9683669	176.8	1.006565	176.8	0.955688	176.8	0.9912916	176.8	1.066342	176.8	-0.205347	176.8	-0.1731441	176.8	-0.2386259	176.8	-0.1874593	176.8	-0.204027	176.8	-0.2052348	176.8	-0.1841682	176.8	-0.1742962	176.8	-0.1839449
177	0.9715941	177	0.9256648	177	0.9647876	177	1.000619	177	0.9572623	177	0.9942392	177	1.062137	177	-0.2124984	177	-0.1709567	177	-0.2321944	177	-0.1887392	177	-0.2062628	177	-0.202931	177	-0.1810296	177	-0.1688301	177	-0.187659
177.2	0.9683502	177.2	0.9264587	177.2	0.9639693	177.2	1.006668	177.2	0.9574608	177.2	0.9993547	177.2	1.065218	177.2	-0.2125434	177.2	-0.1698568	177.2	-0.230859	177.2	-0.1868766	177.2	-0.2038768	177.2	-0.203592	177.2	-0.1830839	177.2	-0.1732607	177.2	-0.1868883
177.4	0.9678152	177.4	0.9304711	177.4	0.9624313	177.4	1.000556	177.4	0.9599497	177.4	0.9933983	177.4	1.066555	177.4	-0.2069122	177.4	-0.1720111	177.4	-0.2334024	177.4	-0.1878967	177.4	-0.2034156	177.4	-0.2035848	177.4	-0.1820179	177.4	-0.1696302	177.4	-0.1878504
177.6	0.9708001	177.6	0.9295328	177.6	0.9628821	177.6	1.002501	177.6	0.954611	177.6	1.000475	177.6	1.068434	177.6	-0.2073514	177.6	-0.1674535	177.6	-0.2321857	177.6	-0.1891754	177.6	-0.2074341	177.6	-0.204246	177.6	-0.1786284	177.6	-0.1721734	177.6	-0.1850534
177.8	0.9762444	177.8	0.9254786	177.8	0.9649102	177.8	1.002519	177.8	0.9553478	177.8	0.9966847	177.8	1.061005	177.8	-0.2082953	177.8	-0.1686349	177.8	-0.2317578	177.8	-0.1841006	177.8	-0.2068022	177.8	-0.2021262	177.8	-0.1807616	177.8	-0.1678444	177.8	-0.1818189
178	0.9715847	178	0.9216925	178	0.9660508	178	1.007737	178	0.9528592	178	0.9971341	178	1.065045	178	-0.2045861	178	-0.1682869	178	-0.2353859	178	-0.1901913	178	-0.2082076	178	-0.2015651	178	-0.1764945	178	-0.1756785	178	-0.1799741
178.2	0.9769616	178.2	0.9235448	178.2	0.965703	178.2	1.0073	178.2	0.957161	178.2	1.000185	178.2	1.073386	178.2	-0.2034734	178.2	-0.1710613	178.2	-0.23057	178.2	-0.1874056	178.2	-0.2035923	178.2	-0.2023307	178.2	-0.1773585	178.2	-0.1696157	178.2	-0.1831086
178.4	0.9723011	178.4	0.9252532	178.4	0.9679012	178.4	1.002371	178.4	0.9553536	178.4	1.003223	178.4	1.066174	178.4	-0.2006577	178.4	-0.1697237	178.4	-0.2302881	178.4	-0.1891533	178.4	-0.2067706	178.4	-0.2023521	178.4	-0.1793137	178.4	-0.1661371	178.4	-0.1821973
178.6	0.9724609	178.6	0.9285656	178.6	0.9674233	178.6	1.005231	178.6	0.9516956	178.6	0.9975633	178.6	1.065459	178.6	-0.2096541	178.6	-0.1621487	178.6	-0.234011	178.6	-0.1902247	178.6	-0.2047403	178.6	-0.2043307	178.6	-0.1790262	178.6	-0.1707047	178.6	-0.179967
178.8	0.9709405	178.8	0.9251899	178.8	0.964833	178.8	1.006681	178.8	0.9543695	178.8	1.00202	178.8	1.071277	178.8	-0.206192	178.8	-0.1675899	178.8	-0.2301532	178.8	-0.1876263	178.8	-0.2077504	178.8	-0.2042156	178.8	-0.1782194	178.8	-0.1692585	178.8	-0.1756978
179	0.9711416	179	0.9290789	179	0.9680666	179	1.004954	179	0.9569533	179	0.9987545	179	1.06644	179	-0.2018563	179	-0.1627123	179	-0.2306708	179	-0.1869845	179	-0.2027112	179	-0.2044915	179	-0.1783444	179	-0.1746967	179	-0.1808054
179.2	0.9730744	179.2	0.9247757	179.2	0.9700946	179.2	1.006036	179.2	0.9603317	179.2	1.000904	179.2	1.068517	179.2	-0.2019275	179.2	-0.1677923	179.2	-0.2302392	179.2	-0.1828051	179.2	-0.2038229	179.2	-0.2021031	179.2	-0.1797647	179.2	-0.1683958	179.2	-0.1822154
179.4	0.9675549	179.4	0.927267	179.4	0.9709131	179.4	1.008339	179.4	0.9584928	179.4	0.9998212	179.4	1.066654	179.4	-0.2082665	179.4	-0.1675932	179.4	-0.2286028	179.4	-0.1859158	179.4	-0.2009517	179.4	-0.2015226	179.4	-0.1741152	179.4	-0.1665726	179.4	-0.1804637
179.6	0.9704719	179.6	0.9242469	179.6	0.9695109	179.6	1.008527	179.6	0.9563046	179.6	1.001	179.6	1.068091	179.6	-0.2043241	179.6	-0.1708091	179.6	-0.2282048	179.6	-0.185469	179.6	-0.2046518	179.6	-0.2004775	179.6	-0.1783497	179.6	-0.1703345	179.6	-0.1807361
179.8	0.9750565	179.8	0.9285552	179.8	0.968557	179.8	1.006935	179.8	0.9618381	179.8	1.00124	179.8	1.073767	179.8	-0.2052107	179.8	-0.1695227	179.8	-0.2308134	179.8	-0.1851508	179.8	-0.2085749	179.8	-0.2035572	179.8	-0.1801668	179.8	-0.1707418	179.8	-0.1797517
180	0.9705834	180	0.9260975	180	0.9689074	180	1.010492	180	0.9575744	180	1.004187	180	1.07112	180	-0.2048673	180	-0.1718727	180	-0.2309691	180	-0.186092	180	-0.2056444	180	-0.2042069	180	-0.1794351	180	-0.1664271	180	-0.1762012
180.2	0.975434	180.2	0.93304	180.2	0.9731385	180.2	1.005785	180.2	0.9663749	180.2	0.9998492	180.2	1.071182	180.2	-0.2035787	180.2	-0.1703991	180.2	-0.2319572	180.2	-0.1849515	180.2	-0.2031698	180.2	-0.2026742	180.2	-0.1781933	180.2	-0.1683839	180.2	-0.1822731
180.4	0.9730803	180.4	0.9316176	180.4	0.9703931	180.4	1.006336	180.4	0.9630377	180.4	1.004476	180.4	1.068314	180.4	-0.1975266	180.4	-0.1674715	180.4	-0.2293111	180.4	-0.1818165	180.4	-0.2058926	180.4	-0.2021162	180.4	-0.1768002	180.4	-0.1701407	180.4	-0.1833154
180.6	0.9736699	180.6	0.9273082	180.6	0.9720812	180.6	1.00613	180.6	0.9582691	180.6	1.000967	180.6	1.069395	180.6	-0.1988684	180.6	-0.1719333	180.6	-0.230664	180.6	-0.1839322	180.6	-0.2046812	180.6	-0.2034482	180.6	-0.179437	180.6	-0.1649727	180.6	-0.1813447
180.8	0.971916	180.8	0.930151	180.8	0.9718665	180.8	1.010279	180.8	0.9585661	180.8	1.003206	180.8	1.069478	180.8	-0.2031078	180.8	-0.1671353	180.8	-0.2288634	180.8	-0.1846089	180.8	-0.2028114	180.8	-0.2001159	180.8	-0.1796488	180.8	-0.1675979	180.8	-0.1807027
181	0.9759892	181	0.9319251	181	0.9708189	181	1.008736	181	0.960375	181	0.9996976	181	1.06525	181	-0.2020862	181	-0.1696072	181	-0.2286814	181	-0.1808447	181	-0.2033821	181	-0.1985865	181	-0.1788204	181	-0.1629901	181	-0.1788702
181.2	0.9740207	181.2	0.9337473	181.2	0.9699974	181.2	1.010252	181.2	0.9544504	181.2	1.000484	181.2	1.06809	181.2	-0.2068239	181.2	-0.1707022	181.2	-0.2266292	181.2	-0.1839992	181.2	-0.2014952	181.2	-0.1978965	181.2	-0.1781827	181.2	-0.1705872	181.2	-0.1775114
181.4	0.9740987	181.4	0.9313488	181.4	0.9707723	181.4	1.010042	181.4	0.960626	181.4	1.002737	181.4	1.065184	181.4	-0.2013122	181.4	-0.1664737	181.4	-0.2301016	181.4	-0.1829301	181.4	-0.2008312	181.4	-0.1960557	181.4	-0.1782864	181.4	-0.1662768	181.4	-0.1812559
181.6	0.9767908	181.6	0.9314131	181.6	0.9693763	181.6	1.007422	181.6	0.9549183	181.6	0.9990522	181.6	1.072211	181.6	-0.1998681	181.6	-0.1676295	181.6	-0.2282668	181.6	-0.1880201	181.6	-0.2010011	181.6	-0.2002955	181.6	-0.1799034	181.6	-0.1696025	181.6	-0.1851196
181.8	0.9783249	181.8	0.9304168	181.8	0.9734352	181.8	1.012724	181.8	0.9593181	181.8	1.007407	181.8	1.07329	181.8	-0.2037887	181.8	-0.1653762	181.8	-0.2296637	181.8	-0.1834626	181.8	-0.203866	181.8	-0.1931092	181.8	-0.1723944	181.8	-0.1689379	181.8	-0.1776483
182	0.9751526	182	0.933023	182	0.9724984	182	1.011836	182	0.9613602	182	1.006255	182	1.066121	182	-0.2039974	182	-0.1695531	182	-0.2312722	182	-0.1810837	182	-0.1981296	182	-0.1980716	182	-0.1750345	182	-0.1676953	182	-0.1776454
182.2	0.9730194	182.2	0.9321063	182.2	0.9715248	182.2	1.006719	182.2	0.9623143	182.2	0.9980639	182.2	1.07532	182.2	-0.2016895	182.2	-0.1678938	182.2	-0.2315541	182.2	-0.1809936	182.2	-0.1996182	182.2	-0.1953121	182.2	-0.1748311	182.2	-0.1656501	182.2	-0.1775375
182.4	0.9735227	182.4	0.9316219	182.4	0.9713076	182.4	1.005196	182.4	0.9581586	182.4	1.000733	182.4	1.070419	182.4	-0.2041499	182.4	-0.1657578	182.4	-0.227948	182.4	-0.1830037	182.4	-0.2021667	182.4	-0.1985819	182.4	-0.1783673	182.4	-0.1698849	182.4	-0.1773393
182.6	0.9752859	182.6	0.9273179	182.6	0.9740702	182.6	1.005902	182.6	0.9611748	182.6	1.004897	182.6	1.06994	182.6	-0.2026265	182.6	-0.1641555	182.6	-0.22527	182.6	-0.1849496	182.6	-0.2010007	182.6	-0.1943759	182.6	-0.1773521	182.6	-0.1655765	182.6	-0.1785914
182.8	0.97539	182.8	0.9339601	182.8	0.9716491	182.8	1.007433	182.8	0.9598706	182.8	1.002126	182.8	1.070122	182.8	-0.202581	182.8	-0.1672621	182.8	-0.2302401	182.8	-0.1777771	182.8	-0.201202	182.8	-0.201108	182.8	-0.1745996	182.8	-0.16546	182.8	-0.1752711
183	0.9718253	183	0.9361251	183	0.9724844	183	1.010323	183	0.9593058	183	1.001506	183	1.074137	183	-0.2037214	183	-0.1645703	183	-0.2260725	183	-0.18326	183	-0.2007806	183	-0.1937045	183	-0.1743743	183	-0.1618312	183	-0.1780314
183.2	0.9723754	183.2	0.9319951	183.2	0.976199	183.2	1.012049	183.2	0.9608759	183.2	1.005	183.2	1.076251	183.2	-0.200582	183.2	-0.1639972	183.2	-0.2265808	183.2	-0.1815111	183.2	-0.1976623	183.2	-0.1995935	183.2	-0.1703183	183.2	-0.1660604	183.2	-0.1775801
183.4	0.9771948	183.4	0.9350247	183.4	0.9730842	183.4	1.009619	183.4	0.9628152	183.4	1.003227	183.4	1.070564	183.4	-0.1981678	183.4	-0.1648328	183.4	-0.2275121	183.4	-0.1779961	183.4	-0.2011677	183.4	-0.1995607	183.4	-0.1719182	183.4	-0.1667334	183.4	-0.1798903
183.6	0.9703408	183.6	0.9338273	183.6	0.9724118	183.6	1.013375	183.6	0.9619108	183.6	1.003603	183.6	1.06827	183.6	-0.2032756	183.6	-0.1639572	183.6	-0.2284542	183.6	-0.182954	183.6	-0.2003403	183.6	-0.1969652	183.6	-0.1758478	183.6	-0.163208	183.6	-0.1778144
183.8	0.9753851	183.8	0.9297847	183.8	0.9695079	183.8	1.012472	183.8	0.9669507	183.8	1.003213	183.8	1.06848	183.8	-0.1980241	183.8	-0.1632606	183.8	-0.227376	183.8	-0.175932	183.8	-0.2019336	183.8	-0.1936141	183.8	-0.1729388	183.8	-0.1641393	183.8	-0.1763781
184	0.9733413	184	0.9321679	184	0.9727452	184	1.008742	184	0.9591944	184	0.9999287	184	1.074135	184	-0.1994828	184	-0.1656149	184	-0.2269494	184	-0.180311	184	-0.1996652	184	-0.1958112	184	-0.1743102	184	-0.1655148	184	-0.1765703
184.2	0.9737678	184.2	0.9326954	184.2	0.9706375	184.2	1.010494	184.2	0.9609447	184.2	1.001016	184.2	1.071829	184.2	-0.2032643	184.2	-0.1623488	184.2	-0.2247854	184.2	-0.185527	184.2	-0.202389	184.2	-0.2002696	184.2	-0.1725949	184.2	-0.1656553	184.2	-0.1776216
184.4	0.9781426	184.4	0.9354853	184.4	0.9704422	184.4	1.015593	184.4	0.9626545	184.4	1.003918	184.4	1.071256	184.4	-0.2002608	184.4	-0.1671014	184.4	-0.2308556	184.4	-0.1809614	184.4	-0.203003	184.4	-0.1946367	184.4	-0.1735868	184.4	-0.1663912	184.4	-0.1754572
184.6	0.9768449	184.6	0.9365035	184.6	0.9741104	184.6	1.010761	184.6	0.9667667	184.6	1.006046	184.6	1.07297	184.6	-0.2024855	184.6	-0.1655992	184.6	-0.2226135	184.6	-0.179054	184.6	-0.2013123	184.6	-0.2012041	184.6	-0.1709614	184.6	-0.1664426	184.6	-0.1764647
184.8	0.9753999	184.8	0.9302119	184.8	0.9749575	184.8	1.010416	184.8	0.9662299	184.8	1.008899	184.8	1.070878	184.8	-0.1970877	184.8	-0.1631797	184.8	-0.2289643	184.8	-0.1807798	184.8	-0.2007069	184.8	-0.1963392	184.8	-0.1710981	184.8	-0.1628287	184.8	-0.1750475
185	0.9800234	185	0.936393	185	0.978313	185	1.012765	185	0.9611211	185	1.002145	185	1.072564	185	-0.1953577	185	-0.163912	185	-0.2279306	185	-0.1804602	185	-0.1990823	185	-0.1987037	185	-0.1738181	185	-0.1656569	185	-0.1786782
185.2	0.9789405	185.2	0.9299665	185.2	0.9757525	185.2	1.009199	185.2	0.9655716	185.2	1.00727	185.2	1.071242	185.2	-0.1987113	185.2	-0.1661712	185.2	-0.2267528	185.2	-0.1798059	185.2	-0.1969392	185.2	-0.1941236	185.2	-0.1749972	185.2	-0.1696149	185.2	-0.1773217
185.4	0.9738161	185.4	0.9330145	185.4	0.9781804	185.4	1.011194	185.4	0.9648351	185.4	1.007759	185.4	1.078909	185.4	-0.1970073	185.4	-0.1611455	185.4	-0.2320898	185.4	-0.1771295	185.4	-0.1965325	185.4	-0.1967238	185.4	-0.1750885	185.4	-0.1641275	185.4	-0.1755294
185.6	0.979407	185.6	0.9378757	185.6	0.9761295	185.6	1.01639	185.6	0.9673555	185.6	1.007643	185.6	1.070851	185.6	-0.1996625	185.6	-0.1638859	185.6	-0.224984	185.6	-0.1804088	185.6	-0.2054183	185.6	-0.1930966	185.6	-0.171681	185.6	-0.1657437	185.6	-0.172344
185.8	0.9824463	185.8	0.9346886	185.8	0.9730929	185.8	1.009571	185.8	0.9596733	185.8	1.005388	185.8	1.067762	185.8	-0.2009179	185.8	-0.1634216	185.8	-0.2284647	185.8	-0.1805474	185.8	-0.1980612	185.8	-0.1964978	185.8	-0.1721054	185.8	-0.1710522	185.8	-0.1758853
186	0.9748387	186	0.9352982	186	0.9764216	186	1.010227	186	0.9615585	186	1.006032	186	1.076155	186	-0.2023114	186	-0.1626788	186	-0.2231857	186	-0.180779	186	-0.1968226	186	-0.1920955	186	-0.1732514	186	-0.1642372	186	-0.172647
186.2	0.9764915	186.2	0.9341381	186.2	0.9733049	186.2	1.010496	186.2	0.9665665	186.2	1.003784	186.2	1.06989	186.2	-0.1963909	186.2	-0.1616505	186.2	-0.2260068	186.2	-0.178657	186.2	-0.194778	186.2	-0.1956281	186.2	-0.1736593	186.2	-0.1596763	186.2	-0.1779537
186.4	0.9822555	186.4	0.9330504	186.4	0.9742756	186.4	1.015408	186.4	0.9674953	186.4	1.007589	186.4	1.077866	186.4	-0.1988932	186.4	-0.1622504	186.4	-0.2265439	186.4	-0.1817421	186.4	-0.1996521	186.4	-0.1929974	186.4	-0.173203	186.4	-0.1595504	186.4	-0.1772297
186.6	0.9797956	186.6	0.9340219	186.6	0.9772847	186.6	1.01256	186.6	0.9632158	186.6	1.010695	186.6	1.070592	186.6	-0.1988423	186.6	-0.1587201	186.6	-0.2247969	186.6	-0.1799972	186.6	-0.1941741	186.6	-0.1959692	186.6	-0.1722018	186.6	-0.161011	186.6	-0.1787133
186.8	0.9781937	186.8	0.9287464	186.8	0.9719063	186.8	1.015617	186.8	0.9658002	186.8	1.009539	186.8	1.072731	186.8	-0.2011798	186.8	-0.1623277	186.8	-0.2261555	186.8	-0.1788368	186.8	-0.1992786	186.8	-0.1923533	186.8	-0.1777145	186.8	-0.163545	186.8	-0.1768989
187	0.9799702	187	0.9370355	187	0.9749531	187	1.013718	187	0.9685659	187	1.008529	187	1.076402	187	-0.1974244	187	-0.1634172	187	-0.2251365	187	-0.1798913	187	-0.1950274	187	-0.1970392	187	-0.176336	187	-0.1623324	187	-0.1756454
187.2	0.9754282	187.2	0.9358979	187.2	0.9793205	187.2	1.013542	187.2	0.9659669	187.2	1.006485	187.2	1.076469	187.2	-0.1956639	187.2	-0.1621009	187.2	-0.2247744	187.2	-0.1804905	187.2	-0.1971761	187.2	-0.1950317	187.2	-0.1778643	187.2	-0.1590111	187.2	-0.1768955
187.4	0.9777119	187.4	0.9376518	187.4	0.9723418	187.4	1.011353	187.4	0.9651121	187.4	1.007501	187.4	1.078722	187.4	-0.1910836	187.4	-0.168489	187.4	-0.222949	187.4	-0.179968	187.4	-0.1984248	187.4	-0.1941215	187.4	-0.1699551	187.4	-0.1589046	187.4	-0.1739038
187.6	0.9744541	187.6	0.9344117	187.6	0.9788547	187.6	1.012223	187.6	0.9643662	187.6	1.005895	187.6	1.071589	187.6	-0.1981509	187.6	-0.1612353	187.6	-0.226673	187.6	-0.1812529	187.6	-0.1994854	187.6	-0.1959375	187.6	-0.171476	187.6	-0.1666725	187.6	-0.175731
187.8	0.9756246	187.8	0.9327932	187.8	0.9787159	187.8	1.014586	187.8	0.9658539	187.8	1.004578	187.8	1.076706	187.8	-0.1947032	187.8	-0.1639616	187.8	-0.2272376	187.8	-0.1783221	187.8	-0.1999479	187.8	-0.194078	187.8	-0.1688987	187.8	-0.160558	187.8	-0.1750582
188	0.9754926	188	0.9354012	188	0.9774423	188	1.014968	188	0.9678288	188	1.0125	188	1.076435	188	-0.1944399	188	-0.161423	188	-0.2261249	188	-0.1808365	188	-0.195116	188	-0.2000994	188	-0.1692341	188	-0.1602027	188	-0.1744203
188.2	0.9813483	188.2	0.9388896	188.2	0.9772319	188.2	1.018566	188.2	0.9630752	188.2	1.006416	188.2	1.077875	188.2	-0.1992597	188.2	-0.1614616	188.2	-0.2269646	188.2	-0.1787049	188.2	-0.1994288	188.2	-0.1915392	188.2	-0.1710762	188.2	-0.163279	188.2	-0.1742496
188.4	0.9819455	188.4	0.9356513	188.4	0.9784628	188.4	1.016818	188.4	0.9708254	188.4	1.005046	188.4	1.078789	188.4	-0.193544	188.4	-0.1613765	188.4	-0.2258318	188.4	-0.1788437	188.4	-0.1920329	188.4	-0.1927819	188.4	-0.1699511	188.4	-0.1617404	188.4	-0.1719355
188.6	0.9790865	188.6	0.9370994	188.6	0.9775735	188.6	1.016846	188.6	0.9669856	188.6	1.004501	188.6	1.078481	188.6	-0.1991925	188.6	-0.1629131	188.6	-0.2259281	188.6	-0.1734064	188.6	-0.1959564	188.6	-0.1945861	188.6	-0.1690312	188.6	-0.1652379	188.6	-0.1743726
188.8	0.9773691	188.8	0.9304514	188.8	0.9799122	188.8	1.016268	188.8	0.9648337	188.8	1.009791	188.8	1.080189	188.8	-0.1982915	188.8	-0.1582526	188.8	-0.2242212	188.8	-0.1767668	188.8	-0.1962325	188.8	-0.1965807	188.8	-0.172366	188.8	-0.1591653	188.8	-0.1749863
189	0.9826517	189	0.9400827	189	0.9802874	189	1.019514	189	0.9707561	189	1.009632	189	1.072757	189	-0.1975723	189	-0.1590845	189	-0.2214088	189	-0.1745345	189	-0.1923296	189	-0.1942279	189	-0.1704339	189	-0.1625988	189	-0.1758324
189.2	0.979279	189.2	0.9366121	189.2	0.975186	189.2	1.015067	189.2	0.9663543	189.2	1.008082	189.2	1.079102	189.2	-0.1937974	189.2	-0.1626842	189.2	-0.224274	189.2	-0.1760594	189.2	-0.1981612	189.2	-0.193358	189.2	-0.1733988	189.2	-0.1597982	189.2	-0.17353
189.4	0.9804568	189.4	0.9397195	189.4	0.9771076	189.4	1.020623	189.4	0.9667724	189.4	1.010334	189.4	1.077787	189.4	-0.1971744	189.4	-0.159701	189.4	-0.2241865	189.4	-0.1775627	189.4	-0.198048	189.4	-0.1944236	189.4	-0.1713883	189.4	-0.1640895	189.4	-0.1728473
189.6	0.9753816	189.6	0.9385612	189.6	0.9750646	189.6	1.013684	189.6	0.969113	189.6	1.014267	189.6	1.077321	189.6	-0.1947177	189.6	-0.1591549	189.6	-0.226082	189.6	-0.1780894	189.6	-0.2003598	189.6	-0.1905709	189.6	-0.1691887	189.6	-0.1592808	189.6	-0.1717645
189.8	0.9777784	189.8	0.9359385	189.8	0.9750455	189.8	1.015881	189.8	0.9679921	189.8	1.008742	189.8	1.075712	189.8	-0.1946651	189.8	-0.1602375	189.8	-0.2231627	189.8	-0.1771589	189.8	-0.1898637	189.8	-0.1893715	189.8	-0.1731615	189.8	-0.1601592	189.8	-0.1707584
190	0.9778738	190	0.9362866	190	0.977708	190	1.01515	190	0.9642029	190	1.011159	190	1.078205	190	-0.1992582	190	-0.1569246	190	-0.2245647	190	-0.1753124	190	-0.1971578	190	-0.1908699	190	-0.1661043	190	-0.1626133	190	-0.1733504
190.2	0.9802742	190.2	0.9381295	190.2	0.9806727	190.2	1.018183	190.2	0.9675708	190.2	1.010666	190.2	1.083359	190.2	-0.1955556	190.2	-0.1627442	190.2	-0.2207633	190.2	-0.1776326	190.2	-0.19238	190.2	-0.1862999	190.2	-0.170181	190.2	-0.1627795	190.2	-0.1726489
190.4	0.980577	190.4	0.9385129	190.4	0.9785109	190.4	1.01106	190.4	0.9677557	190.4	1.008701	190.4	1.07859	190.4	-0.1991594	190.4	-0.1602687	190.4	-0.2209711	190.4	-0.1795141	190.4	-0.1935376	190.4	-0.1847638	190.4	-0.1711844	190.4	-0.1604262	190.4	-0.1765269
190.6	0.983733	190.6	0.9366279	190.6	0.9767352	190.6	1.016611	190.6	0.9677261	190.6	1.013323	190.6	1.075131	190.6	-0.1946992	190.6	-0.1597858	190.6	-0.2248303	190.6	-0.1752999	190.6	-0.1905679	190.6	-0.1968437	190.6	-0.1689713	190.6	-0.1585876	190.6	-0.1756677
190.8	0.9805838	190.8	0.9406055	190.8	0.9765818	190.8	1.014599	190.8	0.9657458	190.8	1.011646	190.8	1.074715	190.8	-0.1911314	190.8	-0.1601157	190.8	-0.2230977	190.8	-0.1785257	190.8	-0.1963621	190.8	-0.1910598	190.8	-0.1738306	190.8	-0.1594975	190.8	-0.1732803
191	0.9809027	191	0.9373829	191	0.9781892	191	1.015692	191	0.9692116	191	1.010672	191	1.078696	191	-0.1955246	191	-0.1557326	191	-0.2222389	191	-0.1754241	191	-0.1934253	191	-0.1923485	191	-0.1709677	191	-0.1627254	191	-0.171983
191.2	0.9837618	191.2	0.9366964	191.2	0.9759091	191.2	1.014993	191.2	0.9720707	191.2	1.012802	191.2	1.076432	191.2	-0.1943305	191.2	-0.1550894	191.2	-0.2224203	191.2	-0.1748809	191.2	-0.1907431	191.2	-0.1921629	191.2	-0.1683779	191.2	-0.1573358	191.2	-0.1721533
191.4	0.9821234	191.4	0.9413192	191.4	0.976298	191.4	1.014055	191.4	0.9716218	191.4	1.012043	191.4	1.078326	191.4	-0.1936684	191.4	-0.1582252	191.4	-0.220007	191.4	-0.1779842	191.4	-0.195032	191.4	-0.1873445	191.4	-0.1691603	191.4	-0.1593117	191.4	-0.1753772
191.6	0.9814503	191.6	0.937421	191.6	0.9818968	191.6	1.018618	191.6	0.9703022	191.6	1.01188	191.6	1.078335	191.6	-0.1976119	191.6	-0.1556404	191.6	-0.2181945	191.6	-0.1760064	191.6	-0.1942949	191.6	-0.1929726	191.6	-0.1697544	191.6	-0.1592956	191.6	-0.1696927
191.8	0.9832811	191.8	0.9424009	191.8	0.9835918	191.8	1.014585	191.8	0.9671484	191.8	1.013713	191.8	1.07788	191.8	-0.193595	191.8	-0.1609357	191.8	-0.222648	191.8	-0.1772586	191.8	-0.19723	191.8	-0.1894098	191.8	-0.1660198	191.8	-0.1573094	191.8	-0.1733277
192	0.9872549	192	0.943293	192	0.9809799	192	1.014466	192	0.9676052	192	1.010377	192	1.079998	192	-0.1933496	192	-0.1600148	192	-0.2193199	192	-0.1752492	192	-0.1938968	192	-0.1919596	192	-0.1699441	192	-0.1537039	192	-0.1727738
192.2	0.9758254	192.2	0.9389267	192.2	0.9791882	192.2	1.019602	192.2	0.9724543	192.2	1.015692	192.2	1.081144	192.2	-0.1975596	192.2	-0.1563817	192.2	-0.2230331	192.2	-0.1735865	192.2	-0.1958109	192.2	-0.1879755	192.2	-0.1679743	192.2	-0.1588454	192.2	-0.1748601
192.4	0.9817479	192.4	0.9402679	192.4	0.9767661	192.4	1.020318	192.4	0.972928	192.4	1.010401	192.4	1.081183	192.4	-0.1986927	192.4	-0.1589602	192.4	-0.2222122	192.4	-0.1731574	192.4	-0.1980964	192.4	-0.1876895	192.4	-0.1644526	192.4	-0.1646792	192.4	-0.1705987
192.6	0.9801215	192.6	0.9426135	192.6	0.9760888	192.6	1.023486	192.6	0.9690614	192.6	1.014285	192.6	1.07966	192.6	-0.194368	192.6	-0.1594605	192.6	-0.2228264	192.6	-0.1752539	192.6	-0.1942866	192.6	-0.1851636	192.6	-0.1681542	192.6	-0.1534798	192.6	-0.1725793
192.8	0.9832047	192.8	0.9436496	192.8	0.9796284	192.8	1.017779	192.8	0.9718276	192.8	1.014304	192.8	1.082921	192.8	-0.1945786	192.8	-0.1590088	192.8	-0.2207037	192.8	-0.1750575	192.8	-0.1905463	192.8	-0.1879742	192.8	-0.1689529	192.8	-0.1569353	192.8	-0.1729676
193	0.9842534	193	0.9387182	193	0.9801022	193	1.021684	193	0.9691462	193	1.013032	193	1.082598	193	-0.1921495	193	-0.1602978	193	-0.2197865	193	-0.1721172	193	-0.1949056	193	-0.1893885	193	-0.1683847	193	-0.1564692	193	-0.1683835
193.2	0.9885321	193.2	0.9393821	193.2	0.9797238	193.2	1.018114	193.2	0.9708712	193.2	1.012187	193.2	1.077802	193.2	-0.1916013	193.2	-0.1605411	193.2	-0.2204147	193.2	-0.1762868	193.2	-0.1928845	193.2	-0.1891498	193.2	-0.1653054	193.2	-0.1563441	193.2	-0.167923
193.4	0.9834278	193.4	0.9372126	193.4	0.9811681	193.4	1.020063	193.4	0.9738426	193.4	1.015365	193.4	1.08164	193.4	-0.1886597	193.4	-0.1570263	193.4	-0.2176167	193.4	-0.1766853	193.4	-0.1924293	193.4	-0.1912539	193.4	-0.1702529	193.4	-0.1553215	193.4	-0.1784693
193.6	0.9833958	193.6	0.9422011	193.6	0.9776437	193.6	1.017125	193.6	0.9702725	193.6	1.015819	193.6	1.075889	193.6	-0.192838	193.6	-0.1575578	193.6	-0.2165481	193.6	-0.1704431	193.6	-0.1923385	193.6	-0.1889961	193.6	-0.1670812	193.6	-0.1608706	193.6	-0.1665897
193.8	0.9888236	193.8	0.9399938	193.8	0.9820214	193.8	1.01757	193.8	0.9698738	193.8	1.01608	193.8	1.082987	193.8	-0.1913257	193.8	-0.1592688	193.8	-0.222543	193.8	-0.1774831	193.8	-0.1911174	193.8	-0.1882589	193.8	-0.1697283	193.8	-0.1564528	193.8	-0.1721988
194	0.986821	194	0.9397477	194	0.9842531	194	1.019821	194	0.9718295	194	1.010497	194	1.080874	194	-0.1927124	194	-0.1560779	194	-0.2211169	194	-0.1700617	194	-0.1930737	194	-0.1834298	194	-0.1679628	194	-0.1558137	194	-0.1702902
194.2	0.9798473	194.2	0.9361942	194.2	0.9813143	194.2	1.022315	194.2	0.9724287	194.2	1.0151	194.2	1.083494	194.2	-0.1923019	194.2	-0.1533927	194.2	-0.2188438	194.2	-0.1753116	194.2	-0.195159	194.2	-0.1869109	194.2	-0.1723528	194.2	-0.1529029	194.2	-0.1696783
194.4	0.9869217	194.4	0.9394528	194.4	0.9846742	194.4	1.019354	194.4	0.971122	194.4	1.01148	194.4	1.081985	194.4	-0.186383	194.4	-0.1573023	194.4	-0.2166023	194.4	-0.1726132	194.4	-0.1920105	194.4	-0.1901798	194.4	-0.169285	194.4	-0.1555329	194.4	-0.1721802
194.6	0.9877871	194.6	0.9432835	194.6	0.9847469	194.6	1.018955	194.6	0.9690456	194.6	1.015015	194.6	1.085401	194.6	-0.192847	194.6	-0.1576375	194.6	-0.2190327	194.6	-0.1707356	194.6	-0.1947553	194.6	-0.1889675	194.6	-0.1686801	194.6	-0.1565986	194.6	-0.1731889
194.8	0.9817322	194.8	0.9412838	194.8	0.9840558	194.8	1.018015	194.8	0.971616	194.8	1.016763	194.8	1.082181	194.8	-0.1975133	194.8	-0.1548357	194.8	-0.2151354	194.8	-0.1704374	194.8	-0.1956756	194.8	-0.1853318	194.8	-0.1660002	194.8	-0.1563125	194.8	-0.1696778
195	0.97785	195	0.9420475	195	0.9837549	195	1.023195	195	0.9735612	195	1.01343	195	1.083746	195	-0.1874219	195	-0.1545455	195	-0.2187355	195	-0.1735298	195	-0.1943324	195	-0.1901677	195	-0.1644975	195	-0.1531966	195	-0.1738364
195.2	0.9810176	195.2	0.9396977	195.2	0.9845535	195.2	1.026764	195.2	0.9735137	195.2	1.010301	195.2	1.082056	195.2	-0.1915696	195.2	-0.1541314	195.2	-0.2197049	195.2	-0.1692623	195.2	-0.1936563	195.2	-0.1858933	195.2	-0.1662447	195.2	-0.1547266	195.2	-0.1753615
195.4	0.9869367	195.4	0.9442595	195.4	0.9815918	195.4	1.018956	195.4	0.9694745	195.4	1.017699	195.4	1.085579	195.4	-0.1905639	195.4	-0.1558768	195.4	-0.2196822	195.4	-0.1730436	195.4	-0.1928798	195.4	-0.1855614	195.4	-0.1666389	195.4	-0.1571767	195.4	-0.1734348
195.6	0.9882219	195.6	0.945226	195.6	0.979601	195.6	1.025706	195.6	0.969128	195.6	1.023118	195.6	1.078057	195.6	-0.1896249	195.6	-0.1559937	195.6	-0.2179633	195.6	-0.174484	195.6	-0.1945925	195.6	-0.1863779	195.6	-0.1642333	195.6	-0.1577702	195.6	-0.1695436
195.8	0.9866888	195.8	0.9418608	195.8	0.9831733	195.8	1.020967	195.8	0.9755805	195.8	1.015601	195.8	1.079978	195.8	-0.1893357	195.8	-0.1560723	195.8	-0.2147597	195.8	-0.1727064	195.8	-0.1891047	195.8	-0.1887311	195.8	-0.1674006	195.8	-0.1519079	195.8	-0.1684038
196	0.9876239	196	0.944176	196	0.9851032	196	1.024146	196	0.9734441	196	1.011164	196	1.08265	196	-0.1925649	196	-0.1489475	196	-0.2152834	196	-0.1713102	196	-0.191345	196	-0.1881368	196	-0.1664167	196	-0.152606	196	-0.1701703
196.2	0.9870295	196.2	0.9435099	196.2	0.9847293	196.2	1.024509	196.2	0.9743483	196.2	1.014391	196.2	1.085147	196.2	-0.1947784	196.2	-0.1518326	196.2	-0.2203816	196.2	-0.1772141	196.2	-0.1896257	196.2	-0.182349	196.2	-0.1668531	196.2	-0.1555312	196.2	-0.1697814
196.4	0.9865729	196.4	0.9431676	196.4	0.9804137	196.4	1.022354	196.4	0.9687582	196.4	1.010748	196.4	1.083687	196.4	-0.1874431	196.4	-0.1579333	196.4	-0.2192531	196.4	-0.173566	196.4	-0.1900172	196.4	-0.1874152	196.4	-0.1637973	196.4	-0.156408	196.4	-0.1712827
196.6	0.985474	196.6	0.9434441	196.6	0.9850385	196.6	1.019385	196.6	0.9798447	196.6	1.014957	196.6	1.08256	196.6	-0.194389	196.6	-0.155926	196.6	-0.2213973	196.6	-0.1679362	196.6	-0.1897887	196.6	-0.1829249	196.6	-0.1679042	196.6	-0.1528914	196.6	-0.1708852
196.8	0.9844419	196.8	0.9457553	196.8	0.9830508	196.8	1.022462	196.8	0.9732289	196.8	1.015097	196.8	1.083737	196.8	-0.1885079	196.8	-0.151461	196.8	-0.2149313	196.8	-0.1727743	196.8	-0.1890314	196.8	-0.1862502	196.8	-0.1673673	196.8	-0.1503926	196.8	-0.1715212
197	0.9858393	197	0.9399191	197	0.9857654	197	1.022891	197	0.9720177	197	1.018078	197	1.084873	197	-0.1846959	197	-0.1532145	197	-0.214032	197	-0.1708587	197	-0.1912982	197	-0.1828699	197	-0.1612991	197	-0.1524124	197	-0.1707558
197.2	0.986755	197.2	0.9435633	197.2	0.9850134	197.2	1.017817	197.2	0.9742349	197.2	1.015919	197.2	1.079863	197.2	-0.190216	197.2	-0.1528311	197.2	-0.2146317	197.2	-0.1687092	197.2	-0.190491	197.2	-0.1851724	197.2	-0.1687488	197.2	-0.1538803	197.2	-0.1687184
197.4	0.9844979	197.4	0.9455076	197.4	0.9835015	197.4	1.023132	197.4	0.9741641	197.4	1.014118	197.4	1.081553	197.4	-0.1871067	197.4	-0.1505622	197.4	-0.2177039	197.4	-0.1684742	197.4	-0.1956323	197.4	-0.1877671	197.4	-0.1667364	197.4	-0.1515979	197.4	-0.1701919
197.6	0.9879396	197.6	0.9411328	197.6	0.9853348	197.6	1.022622	197.6	0.9682553	197.6	1.016155	197.6	1.082078	197.6	-0.1975969	197.6	-0.1549952	197.6	-0.2179153	197.6	-0.1706887	197.6	-0.1890341	197.6	-0.1825847	197.6	-0.1635285	197.6	-0.153281	197.6	-0.1691955
197.8	0.9865554	197.8	0.9437695	197.8	0.9835367	197.8	1.023075	197.8	0.9767816	197.8	1.017891	197.8	1.08872	197.8	-0.1903575	197.8	-0.1519807	197.8	-0.2157115	197.8	-0.1707267	197.8	-0.1834567	197.8	-0.1851843	197.8	-0.1631696	197.8	-0.1528009	197.8	-0.169075
198	0.9863211	198	0.9431939	198	0.9870201	198	1.019656	198	0.9746787	198	1.01687	198	1.084165	198	-0.1914393	198	-0.1509003	198	-0.2142264	198	-0.1690452	198	-0.191917	198	-0.1882896	198	-0.1616616	198	-0.1527669	198	-0.1698431
198.2	0.9859666	198.2	0.9466286	198.2	0.9844519	198.2	1.023231	198.2	0.9703494	198.2	1.016543	198.2	1.085666	198.2	-0.1873003	198.2	-0.1557412	198.2	-0.2130567	198.2	-0.1675963	198.2	-0.1866095	198.2	-0.1878114	198.2	-0.1614823	198.2	-0.1565294	198.2	-0.1702442
198.4	0.9893756	198.4	0.9441057	198.4	0.9890212	198.4	1.023463	198.4	0.9738514	198.4	1.015489	198.4	1.084443	198.4	-0.1868568	198.4	-0.1524317	198.4	-0.217219	198.4	-0.1684359	198.4	-0.1874298	198.4	-0.1858547	198.4	-0.1646433	198.4	-0.1506274	198.4	-0.1717594
198.6	0.9842149	198.6	0.9440488	198.6	0.9837971	198.6	1.021986	198.6	0.973375	198.6	1.017894	198.6	1.085219	198.6	-0.1901409	198.6	-0.154556	198.6	-0.2131928	198.6	-0.1695415	198.6	-0.1915666	198.6	-0.1826014	198.6	-0.1608416	198.6	-0.1531362	198.6	-0.1695073
198.8	0.987803	198.8	0.9437354	198.8	0.9877651	198.8	1.022711	198.8	0.9770381	198.8	1.016825	198.8	1.08391	198.8	-0.1933021	198.8	-0.1515323	198.8	-0.2165735	198.8	-0.1703674	198.8	-0.1880518	198.8	-0.185106	198.8	-0.1628356	198.8	-0.1556155	198.8	-0.1709651
199	0.9882264	199	0.9479263	199	0.9857478	199	1.023688	199	0.9769587	199	1.019058	199	1.080222	199	-0.1850631	199	-0.1561108	199	-0.2163056	199	-0.1674391	199	-0.1857133	199	-0.1855702	199	-0.1615255	199	-0.1540314	199	-0.1682009
199.2	0.9841503	199.2	0.9407085	199.2	0.9833415	199.2	1.023252	199.2	0.9743885	199.2	1.017317	199.2	1.08735	199.2	-0.1904272	199.2	-0.1538684	199.2	-0.2167177	199.2	-0.1720776	199.2	-0.1907869	199.2	-0.1849375	199.2	-0.1591789	199.2	-0.1559435	199.2	-0.1679007
199.4	0.9870931	199.4	0.9474757	199.4	0.982233	199.4	1.025656	199.4	0.9750743	199.4	1.017069	199.4	1.08798	199.4	-0.186996	199.4	-0.1572751	199.4	-0.2177364	199.4	-0.1673937	199.4	-0.1915164	199.4	-0.1813641	199.4	-0.1619216	199.4	-0.1508061	199.4	-0.1701167
199.6	0.9917847	199.6	0.9437656	199.6	0.986918	199.6	1.023887	199.6	0.9779376	199.6	1.021856	199.6	1.087263	199.6	-0.1878538	199.6	-0.1510566	199.6	-0.2170469	199.6	-0.169835	199.6	-0.1885421	199.6	-0.1854783	199.6	-0.1617577	199.6	-0.1548432	199.6	-0.1657854
199.8	0.9886474	199.8	0.9462737	199.8	0.9850677	199.8	1.023359	199.8	0.975566	199.8	1.019759	199.8	1.087111	199.8	-0.1869466	199.8	-0.1511682	199.8	-0.217522	199.8	-0.1662029	199.8	-0.1870856	199.8	-0.1820728	199.8	-0.1631164	199.8	-0.1505811	199.8	-0.1693022
200	0.9761208	200	0.9237581	200	0.9678185	200	1.008665	200	0.9546784	200	1.002913	200	1.077425	200	-0.1966473	200	-0.1683832	200	-0.2340654	200	-0.1938756	200	-0.2062487	200	-0.1977839	200	-0.1763115	200	-0.1625201	200	-0.1703677
200.2	0.9703202	200.2	0.9301849	200.2	0.9647911	200.2	1.008868	200.2	0.9561626	200.2	1.003621	200.2	1.072663	200.2	-0.1944637	200.2	-0.1720642	200.2	-0.2257206	200.2	-0.1891794	200.2	-0.210302	200.2	-0.2040434	200.2	-0.1781327	200.2	-0.1643943	200.2	-0.1707686
200.4	0.9683521	200.4	0.9228935	200.4	0.9657447	200.4	1.006862	200.4	0.958096	200.4	0.99743	200.4	1.076622	200.4	-0.1908236	200.4	-0.168775	200.4	-0.2328195	200.4	-0.1852628	200.4	-0.2061554	200.4	-0.2019665	200.4	-0.1763327	200.4	-0.1644908	200.4	-0.1709104
200.6	0.9784264	200.6	0.9267908	200.6	0.969514	200.6	1.009377	200.6	0.9546449	200.6	1.004401	200.6	1.072317	200.6	-0.1880744	200.6	-0.1672351	200.6	-0.2290287	200.6	-0.185732	200.6	-0.2040174	200.6	-0.2053979	200.6	-0.1771986	200.6	-0.1578434	200.6	-0.169906
200.8	0.9776024	200.8	0.9293334	200.8	0.969786	200.8	1.004698	200.8	0.9578474	200.8	1.00086	200.8	1.074966	200.8	-0.1896317	200.8	-0.1702789	200.8	-0.2278692	200.8	-0.1857879	200.8	-0.2034651	200.8	-0.2025374	200.8	-0.1764139	200.8	-0.1618625	200.8	-0.1756883
201	0.9783291	201	0.9337984	201	0.9682926	201	1.008497	201	0.9531827	201	1.005028	201	1.075526	201	-0.1915758	201	-0.1725056	201	-0.2315301	201	-0.1878797	201	-0.2033289	201	-0.1996977	201	-0.1801276	201	-0.1606312	201	-0.1661598
201.2	0.9825813	201.2	0.9333876	201.2	0.9668877	201.2	1.006706	201.2	0.9612293	201.2	1.006597	201.2	1.073407	201.2	-0.1872263	201.2	-0.1698009	201.2	-0.2322333	201.2	-0.1854593	201.2	-0.2003706	201.2	-0.2049397	201.2	-0.1768379	201.2	-0.1628841	201.2	-0.1660146
201.4	0.9850253	201.4	0.9332157	201.4	0.9669655	201.4	1.015111	201.4	0.9634299	201.4	1.004225	201.4	1.077582	201.4	-0.1890272	201.4	-0.1685828	201.4	-0.2231528	201.4	-0.1854488	201.4	-0.2016853	201.4	-0.2000932	201.4	-0.178091	201.4	-0.1629198	201.4	-0.1623285
201.6	0.9903318	201.6	0.9334691	201.6	0.9716269	201.6	1.010246	201.6	0.9597385	201.6	1.00685	201.6	1.070309	201.6	-0.185678	201.6	-0.1687589	201.6	-0.2305552	201.6	-0.1837499	201.6	-0.2012926	201.6	-0.2033332	201.6	-0.1755271	201.6	-0.162597	201.6	-0.1680715
201.8	0.9916149	201.8	0.9365698	201.8	0.9769132	201.8	1.01693	201.8	0.9606069	201.8	1.006705	201.8	1.083134	201.8	-0.1862306	201.8	-0.1684515	201.8	-0.2296441	201.8	-0.1864713	201.8	-0.2007016	201.8	-0.2020183	201.8	-0.175146	201.8	-0.1651216	201.8	-0.1684671
202	0.9941105	202	0.9406342	202	0.9747611	202	1.011808	202	0.9633443	202	1.005952	202	1.077075	202	-0.1889455	202	-0.171152	202	-0.2262308	202	-0.1835386	202	-0.1990606	202	-0.2040454	202	-0.1733314	202	-0.1611923	202	-0.1645619
202.2	1.00186	202.2	0.9449292	202.2	0.974731	202.2	1.014343	202.2	0.9590731	202.2	1.006894	202.2	1.079312	202.2	-0.188235	202.2	-0.1684323	202.2	-0.2279001	202.2	-0.180086	202.2	-0.2028006	202.2	-0.198352	202.2	-0.1742833	202.2	-0.1621459	202.2	-0.1636268
202.4	1.009209	202.4	0.9413726	202.4	0.9798838	202.4	1.017541	202.4	0.9615226	202.4	1.001757	202.4	1.081687	202.4	-0.1858258	202.4	-0.167022	202.4	-0.2300029	202.4	-0.1844154	202.4	-0.2010547	202.4	-0.1929044	202.4	-0.175564	202.4	-0.1592532	202.4	-0.166232
202.6	1.010394	202.6	0.9407236	202.6	0.9816523	202.6	1.023555	202.6	0.9640803	202.6	1.00677	202.6	1.079036	202.6	-0.181589	202.6	-0.16734	202.6	-0.2286338	202.6	-0.1829694	202.6	-0.1981519	202.6	-0.1977894	202.6	-0.1756172	202.6	-0.1598947	202.6	-0.1634243
202.8	1.012347	202.8	0.9483173	202.8	0.9738078	202.8	1.020572	202.8	0.9561279	202.8	1.007402	202.8	1.082032	202.8	-0.1853319	202.8	-0.1685498	202.8	-0.2267207	202.8	-0.1842993	202.8	-0.1980367	202.8	-0.2024407	202.8	-0.1733995	202.8	-0.1604932	202.8	-0.1647061
203	1.020225	203	0.9485413	203	0.9769065	203	1.020942	203	0.9641774	203	1.00469	203	1.078712	203	-0.1818513	203	-0.1676667	203	-0.2262372	203	-0.1864772	203	-0.1976737	203	-0.1989444	203	-0.1747648	203	-0.1644809	203	-0.1632487
203.2	1.022779	203.2	0.9521972	203.2	0.987185	203.2	1.018297	203.2	0.9670097	203.2	1.00468	203.2	1.078949	203.2	-0.1820631	203.2	-0.1669441	203.2	-0.2310049	203.2	-0.1833014	203.2	-0.19784	203.2	-0.1917835	203.2	-0.1697045	203.2	-0.1654957	203.2	-0.1597929
203.4	1.02687	203.4	0.9551067	203.4	0.9860645	203.4	1.018797	203.4	0.9676582	203.4	1.006642	203.4	1.080198	203.4	-0.1821744	203.4	-0.1672838	203.4	-0.2244097	203.4	-0.1831281	203.4	-0.1985959	203.4	-0.1898896	203.4	-0.1725686	203.4	-0.1633946	203.4	-0.1665996
203.6	1.031242	203.6	0.9545937	203.6	0.9839612	203.6	1.021841	203.6	0.9657627	203.6	1.005629	203.6	1.077085	203.6	-0.1864828	203.6	-0.1660286	203.6	-0.2274712	203.6	-0.1868306	203.6	-0.1964637	203.6	-0.2023587	203.6	-0.1742441	203.6	-0.1644763	203.6	-0.1540018
203.8	1.034977	203.8	0.9620156	203.8	0.9879664	203.8	1.024337	203.8	0.9674335	203.8	1.005001	203.8	1.076547	203.8	-0.1829253	203.8	-0.1664062	203.8	-0.2254949	203.8	-0.1817823	203.8	-0.1968181	203.8	-0.1971089	203.8	-0.1745683	203.8	-0.1604563	203.8	-0.159596
204	1.038723	204	0.9587049	204	0.9918453	204	1.025002	204	0.9703556	204	1.009231	204	1.076597	204	-0.1836477	204	-0.1702893	204	-0.2233397	204	-0.1815222	204	-0.1961307	204	-0.195293	204	-0.1733378	204	-0.1610104	204	-0.1658176
204.2	1.047822	204.2	0.9695598	204.2	0.9913721	204.2	1.019619	204.2	0.967089	204.2	1.00359	204.2	1.079075	204.2	-0.1821667	204.2	-0.1672985	204.2	-0.2270216	204.2	-0.1795497	204.2	-0.205129	204.2	-0.1960132	204.2	-0.1745737	204.2	-0.1587834	204.2	-0.1608352
204.4	1.046545	204.4	0.9693828	204.4	0.9884257	204.4	1.019017	204.4	0.9679754	204.4	1.00693	204.4	1.078684	204.4	-0.1826389	204.4	-0.1693569	204.4	-0.2249402	204.4	-0.1832337	204.4	-0.19394	204.4	-0.1913194	204.4	-0.1732541	204.4	-0.1575913	204.4	-0.1609014
204.6	1.045559	204.6	0.9713182	204.6	0.9953029	204.6	1.024511	204.6	0.9685363	204.6	1.01045	204.6	1.078666	204.6	-0.1804907	204.6	-0.1668131	204.6	-0.2264091	204.6	-0.1797325	204.6	-0.1915683	204.6	-0.1998774	204.6	-0.1722995	204.6	-0.1626918	204.6	-0.1570709
204.8	1.058872	204.8	0.9694172	204.8	0.9954811	204.8	1.027155	204.8	0.9714842	204.8	1.009663	204.8	1.080497	204.8	-0.178287	204.8	-0.1650126	204.8	-0.2261296	204.8	-0.1793271	204.8	-0.2014058	204.8	-0.2012232	204.8	-0.171915	204.8	-0.1585593	204.8	-0.156892
205	1.055548	205	0.9772154	205	0.9975442	205	1.022512	205	0.9683977	205	1.012954	205	1.071166	205	-0.1810301	205	-0.1670216	205	-0.2246753	205	-0.1821117	205	-0.1991597	205	-0.1954276	205	-0.1764558	205	-0.1638699	205	-0.158173
205.2	1.060698	205.2	0.9802725	205.2	0.9979253	205.2	1.032992	205.2	0.9668022	205.2	1.011843	205.2	1.082494	205.2	-0.1815073	205.2	-0.1647304	205.2	-0.224392	205.2	-0.1792025	205.2	-0.1972312	205.2	-0.1979084	205.2	-0.1757459	205.2	-0.1608402	205.2	-0.1591001
205.4	1.068607	205.4	0.9828854	205.4	0.9988644	205.4	1.029333	205.4	0.9715135	205.4	1.007999	205.4	1.079787	205.4	-0.1773865	205.4	-0.1652543	205.4	-0.2240648	205.4	-0.1781265	205.4	-0.2007771	205.4	-0.1967795	205.4	-0.1737193	205.4	-0.159857	205.4	-0.1606246
205.6	1.067539	205.6	0.9847766	205.6	1.00077	205.6	1.034307	205.6	0.9699314	205.6	1.009284	205.6	1.08169	205.6	-0.1813635	205.6	-0.1687108	205.6	-0.2219295	205.6	-0.178768	205.6	-0.1965866	205.6	-0.1946687	205.6	-0.1724024	205.6	-0.1651832	205.6	-0.1596162
205.8	1.077418	205.8	0.9889243	205.8	1.008274	205.8	1.035176	205.8	0.9721169	205.8	1.010158	205.8	1.076398	205.8	-0.1842715	205.8	-0.1668227	205.8	-0.2290797	205.8	-0.1841302	205.8	-0.1980641	205.8	-0.1942378	205.8	-0.1670084	205.8	-0.1625552	205.8	-0.1606808
206	1.08004	206	0.9882718	206	1.00858	206	1.0345	206	0.9731232	206	1.01151	206	1.084226	206	-0.1822763	206	-0.1656826	206	-0.2249024	206	-0.1808308	206	-0.1926208	206	-0.1943025	206	-0.1737868	206	-0.1573571	206	-0.159791
206.2	1.079846	206.2	0.9904324	206.2	1.006525	206.2	1.033477	206.2	0.9749206	206.2	1.011354	206.2	1.075012	206.2	-0.1783713	206.2	-0.1669587	206.2	-0.2263471	206.2	-0.1784048	206.2	-0.1959696	206.2	-0.1962773	206.2	-0.17406	206.2	-0.1615351	206.2	-0.1589788
206.4	1.085511	206.4	0.9922321	206.4	1.006623	206.4	1.034827	206.4	0.9763302	206.4	1.00882	206.4	1.083964	206.4	-0.1757607	206.4	-0.1617603	206.4	-0.2219711	206.4	-0.1801982	206.4	-0.198896	206.4	-0.1954978	206.4	-0.168806	206.4	-0.1592914	206.4	-0.1578652
206.6	1.086942	206.6	1.003279	206.6	1.00795	206.6	1.033305	206.6	0.9766191	206.6	1.012896	206.6	1.078026	206.6	-0.1817457	206.6	-0.1648767	206.6	-0.2226686	206.6	-0.1842281	206.6	-0.1963305	206.6	-0.1907128	206.6	-0.1734928	206.6	-0.1611423	206.6	-0.1619618
206.8	1.089679	206.8	0.9994745	206.8	1.006292	206.8	1.037826	206.8	0.9768351	206.8	1.014107	206.8	1.081512	206.8	-0.1771839	206.82	-0.1617094	206.82	-0.2204859	206.82	-0.1788655	206.82	-0.1904744	206.82	-0.1917589	206.82	-0.1679947	206.82	-0.1624166	206.82	-0.1573299
207	1.097205	207	1.003308	207	1.012858	207	1.034804	207	0.9754187	207	1.011529	207	1.083607	207	-0.1805973	207	-0.1629522	207	-0.2235368	207	-0.180223	207	-0.1975593	207	-0.1903926	207	-0.1690914	207	-0.1603535	207	-0.1590829
207.2	1.102711	207.2	1.005044	207.2	1.012648	207.2	1.039443	207.2	0.9772623	207.2	1.014864	207.2	1.082623	207.2	-0.1764676	207.2	-0.1662894	207.2	-0.2248262	207.2	-0.181972	207.2	-0.1936446	207.2	-0.1948569	207.2	-0.1692721	207.2	-0.1591227	207.2	-0.1586794
207.4	1.105415	207.4	1.006442	207.4	1.011954	207.4	1.04035	207.4	0.9764087	207.4	1.017435	207.4	1.081466	207.4	-0.1763149	207.4	-0.1656157	207.4	-0.2235861	207.4	-0.1812634	207.4	-0.1955808	207.4	-0.2025277	207.4	-0.1715613	207.4	-0.1564142	207.4	-0.1588245
207.6	1.105676	207.6	1.006587	207.6	1.015469	207.6	1.042184	207.6	0.9726555	207.6	1.01443	207.6	1.080011	207.6	-0.1734205	207.6	-0.1652674	207.6	-0.2215942	207.6	-0.1817276	207.6	-0.1954103	207.6	-0.1937583	207.6	-0.1675805	207.6	-0.1596234	207.6	-0.1605438
207.8	1.110927	207.8	1.006496	207.8	1.01752	207.8	1.045079	207.8	0.9741129	207.8	1.010797	207.8	1.082254	207.8	-0.176318	207.8	-0.1687162	207.8	-0.2205969	207.8	-0.1822825	207.8	-0.1988787	207.8	-0.1942964	207.8	-0.1669798	207.8	-0.1572871	207.8	-0.1611919
208	1.110581	208	1.016367	208	1.01425	208	1.043441	208	0.9818103	208	1.017154	208	1.081402	208	-0.1792629	208	-0.1635493	208	-0.2208177	208	-0.1807026	208	-0.1943471	208	-0.1934093	208	-0.1700201	208	-0.1587391	208	-0.1595449
208.2	1.10864	208.2	1.013117	208.2	1.01963	208.2	1.042339	208.2	0.9770669	208.2	1.018406	208.2	1.085843	208.2	-0.1792713	208.2	-0.1602758	208.2	-0.2212933	208.2	-0.1762058	208.2	-0.1975702	208.2	-0.189853	208.2	-0.1716532	208.2	-0.1591281	208.2	-0.1586059
208.4	1.111571	208.4	1.018826	208.4	1.021985	208.4	1.038034	208.4	0.9791921	208.4	1.012429	208.4	1.083257	208.4	-0.1790385	208.4	-0.1622385	208.4	-0.2199358	208.4	-0.1827289	208.4	-0.1923174	208.4	-0.1904252	208.4	-0.1697458	208.4	-0.1574846	208.4	-0.1574272
208.6	1.114917	208.6	1.015474	208.6	1.023569	208.6	1.04532	208.6	0.9793659	208.6	1.017952	208.6	1.08372	208.6	-0.1742024	208.6	-0.1582235	208.6	-0.2247264	208.6	-0.1801902	208.6	-0.1941961	208.6	-0.1889581	208.6	-0.1654351	208.6	-0.1645049	208.6	-0.1601528
208.8	1.121398	208.8	1.020833	208.8	1.023862	208.8	1.046782	208.8	0.9832491	208.8	1.012173	208.8	1.082772	208.8	-0.1821536	208.8	-0.1614234	208.8	-0.2243056	208.8	-0.1775406	208.8	-0.1905369	208.8	-0.1930048	208.8	-0.1694494	208.8	-0.1592756	208.8	-0.1540762
209	1.121163	209	1.022395	209	1.022932	209	1.042605	209	0.9811072	209	1.019115	209	1.083178	209	-0.1724393	209	-0.1612106	209	-0.2206851	209	-0.1794905	209	-0.1911346	209	-0.1902147	209	-0.1692091	209	-0.159206	209	-0.1550398
209.2	1.124525	209.2	1.027161	209.2	1.022577	209.2	1.046843	209.2	0.9798827	209.2	1.019116	209.2	1.083965	209.2	-0.1739812	209.2	-0.1648967	209.2	-0.2158272	209.2	-0.1790129	209.2	-0.1906954	209.2	-0.1935763	209.2	-0.1710742	209.2	-0.1601455	209.2	-0.1600203
209.4	1.131996	209.4	1.025665	209.4	1.031182	209.4	1.046403	209.4	0.979982	209.4	1.020745	209.4	1.085003	209.4	-0.1742598	209.4	-0.1639728	209.4	-0.2248684	209.4	-0.1763091	209.4	-0.1929926	209.4	-0.1936692	209.4	-0.1689999	209.4	-0.1566759	209.4	-0.1590492
209.6	1.12976	209.6	1.025633	209.6	1.026466	209.6	1.050375	209.6	0.9815803	209.6	1.020815	209.6	1.083428	209.6	-0.1735091	209.6	-0.1642924	209.6	-0.2207998	209.6	-0.1788949	209.6	-0.196513	209.6	-0.1911682	209.6	-0.1680779	209.6	-0.1565382	209.6	-0.1585887
209.8	1.131948	209.8	1.030692	209.8	1.031022	209.8	1.050964	209.8	0.9814995	209.8	1.015957	209.8	1.084636	209.8	-0.1750132	209.8	-0.1613695	209.8	-0.2199616	209.8	-0.1785001	209.8	-0.1922682	209.8	-0.1909797	209.8	-0.1677935	209.8	-0.1569573	209.8	-0.160352
210	1.13432	210	1.034884	210	1.032455	210	1.047482	210	0.9836802	210	1.017442	210	1.082765	210	-0.171693	210	-0.1632461	210	-0.2226827	210	-0.177706	210	-0.1903863	210	-0.1931245	210	-0.1671912	210	-0.1575596	210	-0.1549939
210.2	1.137352	210.2	1.034711	210.2	1.033076	210.2	1.054195	210.2	0.9839956	210.2	1.020333	210.2	1.089408	210.2	-0.1780768	210.2	-0.1645572	210.2	-0.220726	210.2	-0.1778678	210.2	-0.1938425	210.2	-0.1901516	210.2	-0.1612373	210.2	-0.1548319	210.2	-0.1525871
210.4	1.137835	210.4	1.042417	210.4	1.035827	210.4	1.0504	210.4	0.9831405	210.4	1.018778	210.4	1.084573	210.4	-0.1744632	210.4	-0.1613774	210.4	-0.219731	210.4	-0.1788039	210.4	-0.1963945	210.4	-0.1933166	210.4	-0.1638094	210.4	-0.1542754	210.4	-0.1514727
210.6	1.140693	210.6	1.038088	210.6	1.028179	210.6	1.053399	210.6	0.9871393	210.6	1.021769	210.6	1.082355	210.6	-0.176068	210.6	-0.15736	210.6	-0.2227577	210.6	-0.177973	210.6	-0.1914262	210.6	-0.1934233	210.6	-0.1710297	210.6	-0.1569023	210.6	-0.1537345
210.8	1.15079	210.8	1.043238	210.8	1.035121	210.8	1.051777	210.8	0.9847549	210.8	1.01955	210.8	1.08595	210.8	-0.1764247	210.8	-0.1617636	210.8	-0.2191655	210.8	-0.1778542	210.8	-0.189193	210.8	-0.1875093	210.8	-0.1685401	210.8	-0.1525477	210.8	-0.1573873
211	1.150033	211	1.03869	211	1.036096	211	1.052001	211	0.9817176	211	1.022216	211	1.086476	211	-0.1725717	211	-0.156949	211	-0.2159534	211	-0.1764518	211	-0.1889896	211	-0.1917316	211	-0.1630592	211	-0.1602259	211	-0.1562348
211.2	1.147618	211.2	1.043267	211.2	1.042979	211.2	1.049852	211.2	0.9824318	211.2	1.021098	211.2	1.084516	211.2	-0.1749368	211.2	-0.1635138	211.2	-0.2214025	211.2	-0.1780216	211.2	-0.1899819	211.2	-0.1930606	211.2	-0.1673577	211.2	-0.1563388	211.2	-0.1564864
211.4	1.153622	211.4	1.04472	211.4	1.041928	211.4	1.05552	211.4	0.9875256	211.4	1.015257	211.4	1.083982	211.4	-0.1745838	211.4	-0.1636425	211.4	-0.2189114	211.4	-0.1781483	211.4	-0.191075	211.4	-0.1910573	211.4	-0.1654904	211.4	-0.1546604	211.4	-0.1565731
211.6	1.153639	211.6	1.045324	211.6	1.03943	211.6	1.059693	211.6	0.9876338	211.6	1.017786	211.6	1.088835	211.6	-0.1711752	211.6	-0.1612719	211.6	-0.2193085	211.6	-0.1769777	211.6	-0.1922905	211.6	-0.192378	211.6	-0.1660152	211.6	-0.1572978	211.6	-0.1521143
211.8	1.154328	211.8	1.047823	211.8	1.038561	211.8	1.055444	211.8	0.9840415	211.8	1.022764	211.8	1.090305	211.8	-0.1727718	211.8	-0.1602756	211.8	-0.2171741	211.8	-0.1765256	211.8	-0.1884359	211.8	-0.1934682	211.8	-0.1678908	211.8	-0.1569735	211.8	-0.1508721
212	1.159727	212	1.050867	212	1.035753	212	1.059713	212	0.9862539	212	1.023431	212	1.084314	212	-0.1718807	212	-0.1589694	212	-0.2188769	212	-0.1729293	212	-0.1922774	212	-0.1913456	212	-0.1647404	212	-0.1575275	212	-0.1553308
212.2	1.16053	212.2	1.053892	212.2	1.044491	212.2	1.05877	212.2	0.9901577	212.2	1.020928	212.2	1.09017	212.2	-0.1747482	212.2	-0.1569453	212.2	-0.2136123	212.2	-0.1765513	212.2	-0.1909459	212.2	-0.1899246	212.2	-0.1652462	212.2	-0.1574957	212.2	-0.1549395
212.4	1.162642	212.4	1.050968	212.4	1.044564	212.4	1.058569	212.4	0.9902585	212.4	1.022866	212.4	1.088335	212.4	-0.1726718	212.4	-0.1580887	212.4	-0.2205111	212.4	-0.1759833	212.4	-0.1901804	212.4	-0.1964063	212.4	-0.1650708	212.4	-0.1500083	212.4	-0.1554849
212.6	1.165066	212.6	1.055297	212.6	1.047322	212.6	1.056243	212.6	0.9920306	212.6	1.024363	212.6	1.090454	212.6	-0.1768273	212.6	-0.1588058	212.6	-0.2168359	212.6	-0.1745384	212.6	-0.1899607	212.6	-0.1875744	212.6	-0.167982	212.6	-0.1559659	212.6	-0.1527608
212.8	1.164603	212.8	1.058226	212.8	1.045387	212.8	1.061832	212.8	0.9914818	212.8	1.021562	212.8	1.088077	212.8	-0.1741791	212.8	-0.1605501	212.8	-0.2148156	212.8	-0.1739588	212.8	-0.1908542	212.8	-0.1884127	212.8	-0.16215	212.8	-0.1578509	212.8	-0.1531262
213	1.165977	213	1.060738	213	1.050739	213	1.068943	213	0.988278	213	1.028986	213	1.087288	213	-0.1741041	213	-0.1565078	213	-0.2208496	213	-0.1733061	213	-0.1892953	213	-0.1882788	213	-0.1665888	213	-0.1603893	213	-0.153147
213.2	1.170958	213.2	1.058722	213.2	1.049997	213.2	1.065929	213.2	0.9931774	213.2	1.022995	213.2	1.087352	213.2	-0.1695258	213.2	-0.1568262	213.2	-0.2202278	213.2	-0.1739858	213.2	-0.1878397	213.2	-0.1922811	213.2	-0.1699171	213.2	-0.1530181	213.2	-0.1568908
213.4	1.17521	213.4	1.055281	213.4	1.051701	213.4	1.062317	213.4	0.9923485	213.4	1.026613	213.4	1.087939	213.4	-0.1684858	213.4	-0.1590268	213.4	-0.2189526	213.4	-0.1764136	213.4	-0.1914831	213.4	-0.1880031	213.4	-0.1626029	213.4	-0.1560632	213.4	-0.1540955
213.6	1.176567	213.6	1.069107	213.6	1.048972	213.6	1.066606	213.6	0.9919291	213.6	1.027399	213.6	1.088833	213.6	-0.1686967	213.6	-0.1583541	213.6	-0.2167475	213.6	-0.1758386	213.6	-0.1905366	213.6	-0.1904197	213.6	-0.1664419	213.6	-0.155734	213.6	-0.1511977
213.8	1.176453	213.8	1.065611	213.8	1.050815	213.8	1.062955	213.8	0.9948219	213.8	1.025938	213.8	1.088726	213.8	-0.1745659	213.8	-0.1571442	213.8	-0.2195632	213.8	-0.1746198	213.8	-0.1850568	213.8	-0.1879277	213.8	-0.1661919	213.8	-0.1525376	213.8	-0.1509756
214	1.182228	214	1.064969	214	1.055854	214	1.064273	214	0.9923995	214	1.025152	214	1.087738	214	-0.1789518	214	-0.1552375	214	-0.2142712	214	-0.1733562	214	-0.1893773	214	-0.1910243	214	-0.1643014	214	-0.1618975	214	-0.1502869
214.2	1.177406	214.2	1.068974	214.2	1.05677	214.2	1.072731	214.2	0.9903554	214.2	1.024448	214.2	1.087892	214.2	-0.1742192	214.2	-0.1563796	214.2	-0.2142811	214.2	-0.1806176	214.2	-0.1856771	214.2	-0.1881931	214.2	-0.1663715	214.2	-0.1555188	214.2	-0.1495463
214.4	1.185169	214.4	1.066674	214.4	1.058581	214.4	1.065997	214.4	0.9976506	214.4	1.029521	214.4	1.092027	214.4	-0.1689857	214.4	-0.1548472	214.4	-0.2181395	214.4	-0.171145	214.4	-0.1902401	214.4	-0.1936912	214.4	-0.1644961	214.4	-0.1540481	214.4	-0.1517053
214.6	1.184803	214.6	1.069891	214.6	1.061703	214.6	1.06864	214.6	0.9956785	214.6	1.02648	214.6	1.088425	214.6	-0.17521	214.6	-0.1595511	214.6	-0.2088843	214.6	-0.1770133	214.6	-0.1864971	214.6	-0.1909955	214.6	-0.1648165	214.6	-0.153401	214.6	-0.156228
214.8	1.185392	214.8	1.078605	214.8	1.058592	214.8	1.067591	214.8	0.9936469	214.8	1.024553	214.8	1.093855	214.8	-0.1714242	214.8	-0.1580458	214.8	-0.2160956	214.8	-0.1709709	214.8	-0.1915919	214.8	-0.1896725	214.8	-0.162025	214.8	-0.1513955	214.8	-0.1505219
215	1.189136	215	1.073073	215	1.059487	215	1.0702	215	0.9949954	215	1.02677	215	1.094353	215	-0.1665479	215	-0.155476	215	-0.217905	215	-0.174487	215	-0.1873201	215	-0.1884299	215	-0.1593458	215	-0.1522563	215	-0.1509812
215.2	1.18864	215.2	1.080142	215.2	1.061016	215.2	1.073828	215.2	0.9952207	215.2	1.027538	215.2	1.094223	215.2	-0.1697283	215.2	-0.1528363	215.2	-0.220527	215.2	-0.1738797	215.2	-0.1857432	215.2	-0.1902281	215.2	-0.160291	215.2	-0.1524806	215.2	-0.1509329
215.4	1.193239	215.4	1.077849	215.4	1.065949	215.4	1.0758	215.4	1.001121	215.4	1.029875	215.4	1.09111	215.4	-0.1687098	215.4	-0.1573334	215.4	-0.2163752	215.4	-0.1750935	215.4	-0.1891469	215.4	-0.1889846	215.4	-0.1596138	215.4	-0.1537108	215.4	-0.1511027
215.6	1.193264	215.6	1.081261	215.6	1.062415	215.6	1.070478	215.6	0.9935389	215.6	1.030752	215.6	1.091403	215.6	-0.1698034	215.6	-0.1554347	215.6	-0.2142068	215.6	-0.1745921	215.6	-0.1843523	215.6	-0.1906831	215.6	-0.1617814	215.6	-0.1510414	215.6	-0.1536223
215.8	1.198364	215.8	1.089674	215.8	1.069085	215.8	1.075749	215.8	0.9952907	215.8	1.024249	215.8	1.100273	215.8	-0.1690285	215.8	-0.1538588	215.8	-0.2144233	215.8	-0.1751219	215.8	-0.1892006	215.8	-0.1865131	215.8	-0.1600946	215.8	-0.148452	215.8	-0.1509248
216	1.197124	216	1.087709	216	1.067958	216	1.076225	216	0.9982922	216	1.030692	216	1.093391	216	-0.1691418	216	-0.1607732	216	-0.2113154	216	-0.1767574	216	-0.1873391	216	-0.1884512	216	-0.1638605	216	-0.1536152	216	-0.1530114
216.2	1.20042	216.2	1.089698	216.2	1.072359	216.2	1.073804	216.2	0.9982749	216.2	1.033584	216.2	1.093922	216.2	-0.1710178	216.2	-0.1540449	216.2	-0.211344	216.2	-0.1717668	216.2	-0.1825073	216.2	-0.1869969	216.2	-0.1633527	216.2	-0.1527241	216.2	-0.1526521
216.4	1.204916	216.4	1.088798	216.4	1.068383	216.4	1.076428	216.4	1.002044	216.4	1.029424	216.4	1.094235	216.4	-0.1664957	216.4	-0.1544892	216.4	-0.2183438	216.4	-0.1745744	216.4	-0.1903187	216.4	-0.1912784	216.4	-0.1612293	216.4	-0.1486326	216.4	-0.1537692
216.6	1.201381	216.6	1.089225	216.6	1.06545	216.6	1.070511	216.6	0.9984593	216.6	1.03324	216.6	1.09349	216.6	-0.1656344	216.6	-0.1552747	216.6	-0.2204059	216.6	-0.1729905	216.6	-0.1832396	216.6	-0.1875765	216.6	-0.1627255	216.6	-0.1534112	216.6	-0.147922
216.8	1.20291	216.8	1.086317	216.8	1.071347	216.8	1.079841	216.8	0.9992525	216.8	1.038323	216.8	1.094038	216.8	-0.1643152	216.8	-0.1560401	216.8	-0.2142881	216.8	-0.1714418	216.8	-0.1868646	216.8	-0.1895839	216.8	-0.1633927	216.8	-0.1512218	216.8	-0.1464563
217	1.208093	217	1.090274	217	1.072492	217	1.082259	217	0.9983515	217	1.033467	217	1.091689	217	-0.1687134	217	-0.1551264	217	-0.2164641	217	-0.1724819	217	-0.19221	217	-0.1864704	217	-0.1604888	217	-0.1492498	217	-0.1509797
217.2	1.206066	217.2	1.089646	217.2	1.072713	217.2	1.079247	217.2	1.002161	217.2	1.02647	217.2	1.098522	217.2	-0.1701819	217.2	-0.1556928	217.2	-0.2190992	217.2	-0.1743125	217.2	-0.1846022	217.2	-0.1881065	217.2	-0.1646499	217.2	-0.1544926	217.2	-0.1472707
217.4	1.209797	217.4	1.092416	217.4	1.076162	217.4	1.083503	217.4	0.9993203	217.4	1.030892	217.4	1.095177	217.4	-0.16889	217.4	-0.1578753	217.4	-0.2139393	217.4	-0.1723907	217.4	-0.1880006	217.4	-0.1888072	217.4	-0.1608262	217.4	-0.1524273	217.4	-0.1493506
217.6	1.211583	217.6	1.097867	217.6	1.075276	217.6	1.078431	217.6	0.998476	217.6	1.032025	217.6	1.092893	217.6	-0.1714698	217.6	-0.1549508	217.6	-0.2143029	217.6	-0.1703645	217.6	-0.1842717	217.6	-0.1848905	217.6	-0.1646486	217.6	-0.1535085	217.6	-0.1502844
217.8	1.212146	217.8	1.096104	217.8	1.076063	217.8	1.079714	217.8	1.001528	217.8	1.030939	217.8	1.097177	217.8	-0.1714136	217.8	-0.1546618	217.8	-0.2127939	217.8	-0.1708451	217.8	-0.1876961	217.8	-0.1916909	217.8	-0.1609608	217.8	-0.1566464	217.8	-0.1492112
218	1.213983	218	1.09674	218	1.075319	218	1.087293	218	1.002953	218	1.032981	218	1.094672	218	-0.1700029	218	-0.1518846	218	-0.2129148	218	-0.1761365	218	-0.1866	218	-0.1895283	218	-0.1650142	218	-0.1485339	218	-0.1484575
218.2	1.216174	218.2	1.100258	218.2	1.080798	218.2	1.082678	218.2	1.003155	218.2	1.032327	218.2	1.093591	218.2	-0.1682564	218.2	-0.1549789	218.2	-0.2122237	218.2	-0.1696314	218.2	-0.182206	218.2	-0.1895205	218.2	-0.1622354	218.2	-0.1513241	218.2	-0.1478454
218.4	1.211396	218.4	1.098119	218.4	1.075231	218.4	1.088196	218.4	1.003247	218.4	1.033114	218.4	1.095979	218.4	-0.1696591	218.4	-0.1562671	218.4	-0.2130497	218.4	-0.1729058	218.4	-0.1820989	218.4	-0.188154	218.4	-0.1626783	218.4	-0.1506644	218.4	-0.146211
218.6	1.213712	218.6	1.099334	218.6	1.082676	218.6	1.091441	218.6	1.007722	218.6	1.033216	218.6	1.094436	218.6	-0.1678092	218.6	-0.1548104	218.6	-0.2133215	218.6	-0.1704375	218.6	-0.1871014	218.6	-0.1895677	218.6	-0.161274	218.6	-0.1503547	218.6	-0.1446301
218.8	1.220214	218.8	1.099878	218.8	1.082369	218.8	1.083411	218.8	1.005329	218.8	1.035247	218.8	1.095068	218.8	-0.166567	218.8	-0.1519093	218.8	-0.2130559	218.8	-0.1717749	218.8	-0.1864659	218.8	-0.1856932	218.8	-0.159793	218.8	-0.1489329	218.8	-0.147365
219	1.220056	219	1.1026	219	1.082373	219	1.085552	219	1.003272	219	1.039833	219	1.096569	219	-0.1638699	219	-0.1541258	219	-0.2145497	219	-0.1727541	219	-0.1867878	219	-0.1885628	219	-0.1617742	219	-0.153207	219	-0.1483593
219.2	1.221522	219.2	1.103029	219.2	1.085842	219.2	1.085193	219.2	1.003542	219.2	1.039067	219.2	1.090036	219.2	-0.1651437	219.2	-0.1545052	219.2	-0.2106291	219.2	-0.1695917	219.2	-0.1812786	219.2	-0.1844291	219.2	-0.1638547	219.2	-0.1507978	219.2	-0.1467064
219.4	1.225354	219.4	1.111763	219.4	1.082008	219.4	1.086978	219.4	1.006973	219.4	1.032466	219.4	1.092194	219.4	-0.167606	219.4	-0.1555472	219.4	-0.207549	219.4	-0.1737546	219.4	-0.1832728	219.4	-0.1861174	219.4	-0.1644882	219.4	-0.1545153	219.4	-0.1505335
219.6	1.216772	219.6	1.104671	219.6	1.084242	219.6	1.090625	219.6	1.012506	219.6	1.033116	219.6	1.09673	219.6	-0.1698398	219.6	-0.1507452	219.6	-0.2130923	219.6	-0.1710483	219.6	-0.1844139	219.6	-0.1823248	219.6	-0.1571187	219.6	-0.1494668	219.6	-0.1504722
219.8	1.223101	219.8	1.109783	219.8	1.083532	219.8	1.095358	219.8	1.010309	219.8	1.038119	219.8	1.09416	219.8	-0.1664753	219.8	-0.1553601	219.8	-0.2124117	219.8	-0.1732864	219.8	-0.185248	219.8	-0.1887662	219.8	-0.1566717	219.8	-0.149473	219.8	-0.1479904
220	1.225739	220	1.108056	220	1.08646	220	1.090956	220	1.008047	220	1.034233	220	1.093202	220	-0.1665519	220	-0.1556243	220	-0.2133177	220	-0.1739445	220	-0.1834436	220	-0.1885592	220	-0.1572364	220	-0.1507959	220	-0.1479651
220.2	1.228771	220.2	1.112426	220.2	1.086297	220.2	1.088538	220.2	1.005206	220.2	1.038126	220.2	1.101442	220.2	-0.166035	220.2	-0.1519013	220.2	-0.2146553	220.2	-0.1689846	220.2	-0.1848796	220.2	-0.1863354	220.2	-0.1563009	220.2	-0.1525852	220.2	-0.1452843
220.4	1.228149	220.4	1.112395	220.4	1.089749	220.4	1.088874	220.4	1.007919	220.4	1.037162	220.4	1.096086	220.4	-0.1683342	220.4	-0.1476711	220.4	-0.2141028	220.4	-0.1720355	220.4	-0.1768659	220.4	-0.1836913	220.4	-0.1566416	220.4	-0.146095	220.4	-0.1467514
220.6	1.233189	220.6	1.109459	220.6	1.089389	220.6	1.089556	220.6	1.00976	220.6	1.037179	220.6	1.101741	220.6	-0.1654249	220.6	-0.1514327	220.6	-0.2170512	220.6	-0.1695592	220.6	-0.17911	220.6	-0.1864358	220.6	-0.1582179	220.6	-0.1527344	220.6	-0.1463024
220.8	1.234143	220.8	1.119407	220.8	1.091432	220.8	1.092306	220.8	1.00489	220.8	1.042464	220.8	1.097049	220.8	-0.1647934	220.8	-0.1547062	220.8	-0.2149308	220.8	-0.1683074	220.8	-0.1800247	220.8	-0.1896305	220.8	-0.1587243	220.8	-0.1494657	220.8	-0.1518856
221	1.235057	221	1.119099	221	1.094757	221	1.099352	221	1.01201	221	1.037225	221	1.098228	221	-0.167326	221	-0.1507322	221	-0.2101053	221	-0.1681065	221	-0.1838923	221	-0.1867777	221	-0.1599414	221	-0.1480838	221	-0.1488251
221.2	1.232098	221.2	1.116712	221.2	1.096374	221.2	1.092281	221.2	1.011192	221.2	1.041009	221.2	1.097889	221.2	-0.1669599	221.2	-0.151333	221.2	-0.2161633	221.2	-0.1681046	221.2	-0.1791132	221.2	-0.1853433	221.2	-0.1589791	221.2	-0.1491974	221.2	-0.1455085
221.4	1.233857	221.4	1.124347	221.4	1.095657	221.4	1.097314	221.4	1.012677	221.4	1.034771	221.4	1.10103	221.4	-0.168253	221.4	-0.1512359	221.4	-0.213546	221.4	-0.1674649	221.4	-0.1827959	221.4	-0.187752	221.4	-0.1534152	221.4	-0.1443373	221.4	-0.1438486
221.6	1.238835	221.6	1.117785	221.6	1.096736	221.6	1.098917	221.6	1.010787	221.6	1.036341	221.6	1.099696	221.6	-0.1660068	221.6	-0.1527877	221.6	-0.211574	221.6	-0.1691325	221.6	-0.1791313	221.6	-0.1887599	221.6	-0.1584281	221.6	-0.1512726	221.6	-0.1492041
221.8	1.241353	221.8	1.123998	221.8	1.097227	221.8	1.097171	221.8	1.00741	221.8	1.04057	221.8	1.104082	221.8	-0.1661851	221.8	-0.1503524	221.8	-0.2163646	221.8	-0.168166	221.8	-0.1833523	221.8	-0.1857012	221.8	-0.1582924	221.8	-0.1490481	221.8	-0.1447199
222	1.232089	222	1.115622	222	1.098198	222	1.097132	222	1.012693	222	1.043889	222	1.105	222	-0.1674764	222	-0.152069	222	-0.2131166	222	-0.173708	222	-0.1803609	222	-0.1837866	222	-0.1570087	222	-0.1488967	222	-0.1486534
222.2	1.241063	222.2	1.120192	222.2	1.097297	222.2	1.098437	222.2	1.012108	222.2	1.041595	222.2	1.100266	222.2	-0.1641585	222.2	-0.1517863	222.2	-0.2103947	222.2	-0.1703727	222.2	-0.1815894	222.2	-0.1857238	222.2	-0.1570642	222.2	-0.1518431	222.2	-0.1441715
222.4	1.241028	222.4	1.122544	222.4	1.10265	222.4	1.102278	222.4	1.01066	222.4	1.037672	222.4	1.106924	222.4	-0.1676516	222.4	-0.1530562	222.4	-0.2124954	222.4	-0.1698017	222.4	-0.1785588	222.4	-0.1878589	222.4	-0.1571815	222.4	-0.146407	222.4	-0.1469179
222.6	1.24326	222.6	1.12525	222.6	1.100087	222.6	1.097732	222.6	1.009543	222.6	1.038409	222.6	1.103531	222.6	-0.1686101	222.6	-0.149928	222.6	-0.2076272	222.6	-0.1708965	222.6	-0.1778055	222.6	-0.1842956	222.6	-0.1600944	222.6	-0.1475679	222.6	-0.148022
222.8	1.248077	222.8	1.127816	222.8	1.099862	222.8	1.102643	222.8	1.013885	222.8	1.040607	222.8	1.103463	222.8	-0.1646474	222.8	-0.1519376	222.8	-0.208447	222.8	-0.16571	222.8	-0.1779677	222.8	-0.1878256	222.8	-0.1549964	222.8	-0.1484783	222.8	-0.1457876
223	1.245363	223	1.126942	223	1.103151	223	1.099276	223	1.017034	223	1.040116	223	1.100856	223	-0.1630019	223	-0.152292	223	-0.2124941	223	-0.1695684	223	-0.1817818	223	-0.1876412	223	-0.1540105	223	-0.1467439	223	-0.1443294
223.2	1.251873	223.2	1.132079	223.2	1.104949	223.2	1.100477	223.2	1.009851	223.2	1.039095	223.2	1.106804	223.2	-0.1553452	223.2	-0.1530047	223.2	-0.2090255	223.2	-0.1713912	223.2	-0.1770895	223.2	-0.1821108	223.2	-0.1556742	223.2	-0.1480289	223.2	-0.1445692
223.4	1.244323	223.4	1.130144	223.4	1.100407	223.4	1.101909	223.4	1.017021	223.4	1.04212	223.4	1.103402	223.4	-0.1608026	223.4	-0.1492224	223.4	-0.2116286	223.4	-0.1649488	223.4	-0.1824552	223.4	-0.1877943	223.4	-0.1599641	223.4	-0.1458723	223.4	-0.1458964
223.6	1.252405	223.6	1.128148	223.6	1.105087	223.6	1.106305	223.6	1.015709	223.6	1.041888	223.6	1.104913	223.6	-0.16628	223.6	-0.1479807	223.6	-0.2050658	223.6	-0.1703219	223.6	-0.178455	223.6	-0.1840534	223.6	-0.1587437	223.6	-0.151785	223.6	-0.148615
223.8	1.249624	223.8	1.130677	223.8	1.111534	223.8	1.105016	223.8	1.017218	223.8	1.042199	223.8	1.102387	223.8	-0.1642843	223.8	-0.1512175	223.8	-0.2109113	223.8	-0.1660963	223.8	-0.1760356	223.8	-0.1844666	223.8	-0.1570138	223.8	-0.1468755	223.8	-0.1461986
224	1.250405	224	1.131429	224	1.108271	224	1.107654	224	1.019615	224	1.042832	224	1.102685	224	-0.1663859	224	-0.1499666	224	-0.2077491	224	-0.1689095	224	-0.181135	224	-0.1819123	224	-0.1549547	224	-0.1494242	224	-0.1467357
224.2	1.253466	224.2	1.135609	224.2	1.108637	224.2	1.099503	224.2	1.022073	224.2	1.040696	224.2	1.100274	224.2	-0.1615028	224.2	-0.1526194	224.2	-0.209469	224.2	-0.1687298	224.2	-0.1774781	224.2	-0.1872776	224.2	-0.1575677	224.2	-0.1465931	224.2	-0.145723
224.4	1.25564	224.4	1.133192	224.4	1.113004	224.4	1.103978	224.4	1.014057	224.4	1.042402	224.4	1.101773	224.4	-0.1640276	224.4	-0.148606	224.4	-0.2111208	224.4	-0.1665185	224.4	-0.1774416	224.4	-0.1864063	224.4	-0.1566615	224.4	-0.1425097	224.4	-0.1449766
224.6	1.252715	224.6	1.136578	224.6	1.109162	224.6	1.10467	224.6	1.01922	224.6	1.044063	224.6	1.103469	224.6	-0.1656827	224.6	-0.1508895	224.6	-0.2080694	224.6	-0.1707152	224.6	-0.1829044	224.6	-0.1862374	224.6	-0.16114	224.6	-0.1477858	224.6	-0.1495541
224.8	1.259292	224.8	1.140406	224.8	1.10647	224.8	1.108299	224.8	1.012059	224.8	1.045327	224.8	1.103649	224.8	-0.1620764	224.8	-0.1470423	224.8	-0.2094272	224.8	-0.164426	224.8	-0.1811571	224.8	-0.1857607	224.8	-0.1559053	224.8	-0.1470448	224.8	-0.1465821
225	1.262479	225	1.141304	225	1.115466	225	1.107537	225	1.020741	225	1.047394	225	1.102814	225	-0.1599006	225	-0.1505933	225	-0.2061784	225	-0.1658555	225	-0.1770094	225	-0.1807381	225	-0.1540234	225	-0.1482551	225	-0.1433084
225.2	1.25937	225.2	1.143609	225.2	1.112626	225.2	1.111032	225.2	1.01853	225.2	1.045568	225.2	1.101152	225.2	-0.1610079	225.2	-0.148952	225.2	-0.2083218	225.2	-0.1679022	225.2	-0.176798	225.2	-0.1851828	225.2	-0.1559311	225.2	-0.1414001	225.2	-0.1449406
225.4	1.256509	225.4	1.143913	225.4	1.119797	225.4	1.113372	225.4	1.021588	225.4	1.043415	225.4	1.108242	225.4	-0.1595799	225.4	-0.1497158	225.4	-0.2100399	225.4	-0.1664578	225.4	-0.1789878	225.4	-0.1870002	225.4	-0.1536699	225.4	-0.1470378	225.4	-0.1425056
225.6	1.261217	225.6	1.144965	225.6	1.11479	225.6	1.109932	225.6	1.021972	225.6	1.045483	225.6	1.106486	225.6	-0.1606658	225.6	-0.1449436	225.6	-0.2088419	225.6	-0.1656679	225.6	-0.1791305	225.6	-0.1824725	225.6	-0.1539888	225.6	-0.1516196	225.6	-0.1412919
225.8	1.265131	225.8	1.145002	225.8	1.11782	225.8	1.108059	225.8	1.020631	225.8	1.046797	225.8	1.107118	225.8	-0.1592859	225.8	-0.1476959	225.8	-0.211541	225.8	-0.164307	225.8	-0.1780368	225.8	-0.1819443	225.8	-0.1528274	225.8	-0.1482497	225.8	-0.1450806
226	1.26609	226	1.144332	226	1.117074	226	1.11122	226	1.021057	226	1.043545	226	1.101768	226	-0.1601978	226	-0.145754	226	-0.2075367	226	-0.1625813	226	-0.179345	226	-0.1825649	226	-0.1522055	226	-0.1484127	226	-0.1438479
226.2	1.266062	226.2	1.147419	226.2	1.111077	226.2	1.111008	226.2	1.021116	226.2	1.047259	226.2	1.105575	226.2	-0.1609888	226.2	-0.1483033	226.2	-0.209583	226.2	-0.1660431	226.2	-0.1766117	226.2	-0.1814629	226.2	-0.1515548	226.2	-0.1473983	226.2	-0.1467589
226.4	1.263503	226.4	1.145268	226.4	1.117388	226.4	1.115347	226.4	1.025313	226.4	1.048799	226.4	1.106276	226.4	-0.1598136	226.4	-0.1489318	226.4	-0.2088011	226.4	-0.1658675	226.4	-0.1786763	226.4	-0.1817466	226.4	-0.1569156	226.4	-0.1477067	226.4	-0.1469905
226.6	1.267994	226.6	1.148322	226.6	1.122325	226.6	1.115561	226.6	1.022011	226.6	1.046884	226.6	1.10708	226.6	-0.1624842	226.6	-0.1466995	226.6	-0.2117928	226.6	-0.165772	226.6	-0.1777149	226.6	-0.1838056	226.6	-0.1502475	226.6	-0.1439928	226.6	-0.1482695
226.8	1.270129	226.8	1.146883	226.8	1.117708	226.8	1.112384	226.8	1.02502	226.8	1.045817	226.8	1.105954	226.8	-0.1615191	226.8	-0.1460132	226.8	-0.2063266	226.8	-0.1616812	226.8	-0.1755229	226.8	-0.1860837	226.8	-0.1540358	226.8	-0.1451425	226.8	-0.1409069
227	1.267805	227	1.1509	227	1.118961	227	1.115973	227	1.030052	227	1.045712	227	1.10727	227	-0.1594788	227	-0.1517984	227	-0.210729	227	-0.1627262	227	-0.1791762	227	-0.1859677	227	-0.1492534	227	-0.144275	227	-0.1502926
227.2	1.270467	227.2	1.14808	227.2	1.123541	227.2	1.118796	227.2	1.025993	227.2	1.047262	227.2	1.107582	227.2	-0.1557384	227.2	-0.1480966	227.2	-0.2100855	227.2	-0.1645579	227.2	-0.1764041	227.2	-0.1793813	227.2	-0.1566169	227.2	-0.1429052	227.2	-0.1453608
227.4	1.27221	227.4	1.15005	227.4	1.123119	227.4	1.117036	227.4	1.025842	227.4	1.047724	227.4	1.10226	227.4	-0.1605693	227.4	-0.1519354	227.4	-0.2070498	227.4	-0.1657759	227.4	-0.1732682	227.4	-0.1797436	227.4	-0.1508463	227.4	-0.1481555	227.4	-0.1475185
227.6	1.271951	227.6	1.152665	227.6	1.123717	227.6	1.114207	227.6	1.024825	227.6	1.053729	227.6	1.109295	227.6	-0.1604668	227.6	-0.1516398	227.6	-0.2115336	227.6	-0.1651144	227.6	-0.1762645	227.6	-0.1836656	227.6	-0.1516608	227.6	-0.1457434	227.6	-0.1445426
227.8	1.277632	227.8	1.152179	227.8	1.122238	227.8	1.113352	227.8	1.023918	227.8	1.044915	227.8	1.10714	227.8	-0.159093	227.8	-0.1488645	227.8	-0.2070555	227.8	-0.1628269	227.8	-0.179967	227.8	-0.1820949	227.8	-0.1511378	227.8	-0.1411144	227.8	-0.1473153
228	1.278823	228	1.154221	228	1.126495	228	1.120212	228	1.027556	228	1.047113	228	1.108503	228	-0.1554542	228	-0.1492537	228	-0.2107425	228	-0.16495	228	-0.1747473	228	-0.1828284	228	-0.153542	228	-0.1424602	228	-0.142415
228.2	1.274178	228.2	1.156332	228.2	1.120903	228.2	1.120811	228.2	1.02811	228.2	1.050837	228.2	1.108091	228.2	-0.1594676	228.2	-0.1480371	228.2	-0.2033999	228.2	-0.1629868	228.2	-0.1745392	228.2	-0.1801096	228.2	-0.1550194	228.2	-0.1399456	228.2	-0.1450116
228.4	1.278376	228.4	1.15984	228.4	1.12416	228.4	1.122684	228.4	1.021547	228.4	1.053163	228.4	1.106894	228.4	-0.1574365	228.4	-0.1544758	228.4	-0.20906	228.4	-0.161781	228.4	-0.1702353	228.4	-0.1802692	228.4	-0.1540668	228.4	-0.1395218	228.4	-0.1445899
228.6	1.279006	228.6	1.159307	228.6	1.125698	228.6	1.119262	228.6	1.027777	228.6	1.049812	228.6	1.10616	228.6	-0.1580258	228.6	-0.145557	228.6	-0.2100002	228.6	-0.1603094	228.6	-0.1776286	228.6	-0.1787925	228.6	-0.1549159	228.6	-0.1448726	228.6	-0.1465281
228.8	1.278014	228.8	1.15847	228.8	1.131164	228.8	1.117137	228.8	1.032307	228.8	1.052318	228.8	1.107031	228.8	-0.1575101	228.8	-0.1425557	228.8	-0.2031874	228.8	-0.1666568	228.8	-0.1735211	228.8	-0.1808432	228.8	-0.1515025	228.8	-0.1452634	228.8	-0.1432429
229	1.279792	229	1.161714	229	1.128384	229	1.121794	229	1.030741	229	1.050223	229	1.111653	229	-0.1584965	229	-0.1498788	229	-0.2057359	229	-0.1608661	229	-0.1738954	229	-0.1808467	229	-0.1521494	229	-0.1494167	229	-0.139209
229.2	1.280851	229.2	1.156939	229.2	1.130935	229.2	1.121135	229.2	1.032614	229.2	1.048783	229.2	1.112332	229.2	-0.1588638	229.2	-0.1417058	229.2	-0.2099641	229.2	-0.1639839	229.2	-0.1755386	229.2	-0.1849639	229.2	-0.1544937	229.2	-0.1420854	229.2	-0.1401893
229.4	1.284218	229.4	1.162849	229.4	1.133503	229.4	1.121909	229.4	1.027378	229.4	1.050418	229.4	1.110725	229.4	-0.1623836	229.4	-0.1431737	229.4	-0.2005809	229.4	-0.1611712	229.4	-0.1704628	229.4	-0.181313	229.4	-0.1539635	229.4	-0.1485087	229.4	-0.1438532
229.6	1.279772	229.6	1.160725	229.6	1.13256	229.6	1.126379	229.6	1.03152	229.6	1.051223	229.6	1.1119	229.6	-0.1588886	229.6	-0.1466717	229.6	-0.2093965	229.6	-0.1629976	229.6	-0.1727259	229.6	-0.1827928	229.6	-0.1511202	229.6	-0.1483248	229.6	-0.1400753
229.8	1.287788	229.8	1.1632	229.8	1.137501	229.8	1.123086	229.8	1.031103	229.8	1.051726	229.8	1.111092	229.8	-0.1601353	229.8	-0.1427527	229.8	-0.2031877	229.8	-0.1643934	229.8	-0.176742	229.8	-0.1838537	229.8	-0.1543648	229.8	-0.1447411	229.8	-0.1423313
230	1.285046	230	1.16756	230	1.136562	230	1.124086	230	1.02959	230	1.053498	230	1.110651	230	-0.162765	230	-0.1487129	230	-0.2033022	230	-0.1640372	230	-0.1675281	230	-0.1805864	230	-0.1483976	230	-0.1431024	230	-0.1424337
230.2	1.289051	230.2	1.164735	230.2	1.133808	230.2	1.121657	230.2	1.032686	230.2	1.055088	230.2	1.110243	230.2	-0.1614636	230.2	-0.1508056	230.2	-0.2038565	230.2	-0.1668184	230.2	-0.174504	230.2	-0.1822487	230.2	-0.1517236	230.2	-0.1402664	230.2	-0.1430756
230.4	1.284438	230.4	1.167438	230.4	1.136208	230.4	1.127968	230.4	1.031146	230.4	1.055591	230.4	1.109622	230.4	-0.1602127	230.4	-0.1457555	230.4	-0.2066949	230.4	-0.1650149	230.4	-0.1814511	230.4	-0.184266	230.4	-0.1531466	230.4	-0.1434068	230.4	-0.1433221
230.6	1.288647	230.6	1.169043	230.6	1.135724	230.6	1.128123	230.6	1.028694	230.6	1.056564	230.6	1.112259	230.6	-0.1563173	230.6	-0.1452677	230.6	-0.2062129	230.6	-0.1632867	230.6	-0.1726361	230.6	-0.1793214	230.6	-0.1519113	230.6	-0.1425393	230.6	-0.1392902
230.8	1.286881	230.8	1.168107	230.8	1.141232	230.8	1.122632	230.8	1.034846	230.8	1.052639	230.8	1.11585	230.8	-0.1580013	230.8	-0.1471633	230.8	-0.2075404	230.8	-0.1644692	230.8	-0.1724679	230.8	-0.1835123	230.8	-0.1516992	230.8	-0.1457326	230.8	-0.1390687
231	1.284892	231	1.16807	231	1.134673	231	1.126578	231	1.038476	231	1.052124	231	1.115303	231	-0.1582556	231	-0.1454585	231	-0.2066279	231	-0.1597582	231	-0.1760889	231	-0.1818087	231	-0.1511333	231	-0.1457901	231	-0.1401662
231.2	1.293401	231.2	1.164208	231.2	1.13819	231.2	1.130444	231.2	1.033906	231.2	1.056147	231.2	1.110284	231.2	-0.1569585	231.2	-0.1391054	231.2	-0.2045299	231.2	-0.1639979	231.2	-0.1750469	231.2	-0.1789059	231.2	-0.1478274	231.2	-0.1417533	231.2	-0.1447247
231.4	1.293218	231.4	1.165466	231.4	1.141163	231.4	1.13208	231.4	1.036343	231.4	1.057746	231.4	1.108181	231.4	-0.1592946	231.4	-0.1488044	231.4	-0.2023362	231.4	-0.1628456	231.4	-0.1729378	231.4	-0.1846864	231.4	-0.1495093	231.4	-0.1433191	231.4	-0.1429908
231.6	1.289275	231.6	1.171512	231.6	1.135583	231.6	1.12897	231.6	1.034162	231.6	1.058115	231.6	1.110536	231.6	-0.1566786	231.6	-0.1445735	231.6	-0.2014774	231.6	-0.1621091	231.6	-0.1728282	231.6	-0.1803876	231.6	-0.1506835	231.6	-0.1435748	231.6	-0.143186
231.8	1.292732	231.8	1.172637	231.8	1.142148	231.8	1.132543	231.8	1.03377	231.8	1.062036	231.8	1.108495	231.8	-0.1619895	231.8	-0.1424949	231.8	-0.2098803	231.8	-0.1591429	231.8	-0.1736697	231.8	-0.1797407	231.8	-0.1484073	231.8	-0.141644	231.8	-0.1430172
232	1.2966	232	1.177611	232	1.143334	232	1.136364	232	1.02979	232	1.059933	232	1.120534	232	-0.1524993	232	-0.1442978	232	-0.2097788	232	-0.1646883	232	-0.1691615	232	-0.1817199	232	-0.1511255	232	-0.1399713	232	-0.1388013
232.2	1.295637	232.2	1.175668	232.2	1.144739	232.2	1.134508	232.2	1.03809	232.2	1.057741	232.2	1.110528	232.2	-0.1558594	232.2	-0.1418179	232.2	-0.2050907	232.2	-0.1630793	232.2	-0.1752566	232.2	-0.1748682	232.2	-0.1563469	232.2	-0.1383593	232.2	-0.142225
232.4	1.299742	232.4	1.176756	232.4	1.139007	232.4	1.13533	232.4	1.038044	232.4	1.058565	232.4	1.110825	232.4	-0.1558383	232.41	-0.1452177	232.41	-0.2052514	232.41	-0.1622033	232.41	-0.1713216	232.41	-0.1794903	232.41	-0.1502568	232.41	-0.1413309	232.41	-0.1424249
232.6	1.300123	232.6	1.175036	232.6	1.138427	232.6	1.131444	232.6	1.035775	232.6	1.056412	232.6	1.114333	232.6	-0.1527726	232.6	-0.1425637	232.6	-0.2064239	232.6	-0.1646721	232.6	-0.1736063	232.6	-0.1785219	232.6	-0.1503591	232.6	-0.1405918	232.6	-0.1411061
232.8	1.299392	232.8	1.178886	232.8	1.145231	232.8	1.135849	232.8	1.038822	232.8	1.05698	232.8	1.112685	232.8	-0.1584644	232.8	-0.1457759	232.8	-0.2029886	232.8	-0.162455	232.8	-0.1698248	232.8	-0.180334	232.8	-0.1488573	232.8	-0.1400577	232.8	-0.1454472
233	1.29761	233	1.176934	233	1.143561	233	1.137313	233	1.039244	233	1.057515	233	1.117071	233	-0.16024	233	-0.1468378	233	-0.207777	233	-0.1659299	233	-0.1700839	233	-0.1782226	233	-0.1493664	233	-0.1461579	233	-0.1383611
233.2	1.301529	233.2	1.18071	233.2	1.146332	233.2	1.137988	233.2	1.03532	233.2	1.054345	233.2	1.115085	233.2	-0.160517	233.2	-0.1490101	233.2	-0.2042335	233.2	-0.1595971	233.2	-0.1692352	233.2	-0.180825	233.2	-0.1523377	233.2	-0.1407162	233.2	-0.1423138
233.4	1.301466	233.4	1.18205	233.4	1.145518	233.4	1.136077	233.4	1.035226	233.4	1.060889	233.4	1.109971	233.4	-0.1571164	233.4	-0.1434191	233.4	-0.2071573	233.4	-0.1613117	233.4	-0.1749826	233.4	-0.183242	233.4	-0.1484796	233.4	-0.1388635	233.4	-0.1393973
233.6	1.301688	233.6	1.177923	233.6	1.143333	233.6	1.136979	233.6	1.042552	233.6	1.061853	233.6	1.114248	233.6	-0.1555856	233.6	-0.1461793	233.6	-0.2026526	233.6	-0.1588084	233.6	-0.1698792	233.6	-0.1799958	233.6	-0.1484316	233.6	-0.1430637	233.6	-0.1452938
233.8	1.300996	233.8	1.184515	233.8	1.148185	233.8	1.135962	233.8	1.037607	233.8	1.059228	233.8	1.11401	233.8	-0.1550936	233.8	-0.1441751	233.8	-0.2049738	233.8	-0.1610859	233.8	-0.173243	233.8	-0.1792277	233.8	-0.148253	233.8	-0.1451067	233.8	-0.137825
234	1.302605	234	1.181948	234	1.1499	234	1.136407	234	1.036731	234	1.063797	234	1.114619	234	-0.1561885	234	-0.1510184	234	-0.2036937	234	-0.1616132	234	-0.1691733	234	-0.1778533	234	-0.1478781	234	-0.1426567	234	-0.1429533
234.2	1.304179	234.2	1.190852	234.2	1.152488	234.2	1.135544	234.2	1.039198	234.2	1.059037	234.2	1.113427	234.2	-0.1510398	234.2	-0.1435806	234.2	-0.2024329	234.2	-0.1612722	234.2	-0.1714685	234.2	-0.1790487	234.2	-0.1487413	234.2	-0.1414086	234.2	-0.1420458
234.4	1.30657	234.4	1.190368	234.4	1.146805	234.4	1.141933	234.4	1.04225	234.4	1.065251	234.4	1.116383	234.4	-0.1565793	234.4	-0.1462424	234.4	-0.2050223	234.4	-0.1606925	234.4	-0.1756068	234.4	-0.1792335	234.4	-0.1470166	234.4	-0.1412039	234.4	-0.140186
234.6	1.307862	234.6	1.187338	234.6	1.152043	234.6	1.1378	234.6	1.038448	234.6	1.063329	234.6	1.117594	234.6	-0.1545576	234.6	-0.1401251	234.6	-0.2039846	234.6	-0.1593561	234.6	-0.1739518	234.6	-0.1784681	234.6	-0.1483916	234.6	-0.1431869	234.6	-0.1393256
234.8	1.309299	234.8	1.190052	234.8	1.155824	234.8	1.143272	234.8	1.03893	234.8	1.060756	234.8	1.119	234.8	-0.1553661	234.8	-0.1474418	234.8	-0.200324	234.8	-0.1625229	234.8	-0.1730472	234.8	-0.1757001	234.8	-0.1475542	234.8	-0.1382744	234.8	-0.1409186
235	1.304569	235	1.186351	235	1.15694	235	1.139902	235	1.041342	235	1.058973	235	1.114776	235	-0.1566663	235	-0.1407353	235	-0.2065903	235	-0.1617085	235	-0.172725	235	-0.1781262	235	-0.1474739	235	-0.1367989	235	-0.1454993
235.2	1.309282	235.2	1.191188	235.2	1.149828	235.2	1.142278	235.2	1.04315	235.2	1.065308	235.2	1.115153	235.2	-0.158475	235.2	-0.1400101	235.2	-0.2026455	235.2	-0.1558921	235.2	-0.1693276	235.2	-0.1801848	235.2	-0.1489284	235.2	-0.1392936	235.2	-0.1404207
235.4	1.311498	235.4	1.189045	235.4	1.154858	235.4	1.14054	235.4	1.045572	235.4	1.063424	235.4	1.114799	235.4	-0.1554409	235.4	-0.1411003	235.4	-0.1984448	235.4	-0.1626231	235.4	-0.1713829	235.4	-0.1805536	235.4	-0.1457866	235.4	-0.1405592	235.4	-0.1390831
235.6	1.313819	235.6	1.187903	235.6	1.154402	235.6	1.14249	235.6	1.041659	235.6	1.057927	235.6	1.120284	235.6	-0.1557637	235.6	-0.1433252	235.6	-0.2036797	235.6	-0.1586947	235.6	-0.1697277	235.6	-0.1803798	235.6	-0.1460991	235.6	-0.1418734	235.6	-0.1414852
235.8	1.313704	235.8	1.191921	235.8	1.152379	235.8	1.146082	235.8	1.042928	235.8	1.06268	235.8	1.114864	235.8	-0.1615571	235.8	-0.1451473	235.8	-0.2026458	235.8	-0.1588576	235.8	-0.1711004	235.8	-0.1769176	235.8	-0.14831	235.8	-0.1399117	235.8	-0.1400158
236	1.305694	236	1.18698	236	1.159604	236	1.142335	236	1.041018	236	1.063258	236	1.112433	236	-0.156258	236	-0.1436998	236	-0.2021676	236	-0.1588209	236	-0.1698805	236	-0.1807127	236	-0.147646	236	-0.1392275	236	-0.1412832
236.2	1.317392	236.2	1.188752	236.2	1.156655	236.2	1.146201	236.2	1.04201	236.2	1.063383	236.2	1.113478	236.2	-0.157812	236.2	-0.1427449	236.2	-0.2046656	236.2	-0.1575258	236.2	-0.1706216	236.2	-0.1786773	236.2	-0.1465002	236.2	-0.1407254	236.2	-0.1392367
236.4	1.315697	236.4	1.18981	236.4	1.157972	236.4	1.140466	236.4	1.046715	236.4	1.066252	236.4	1.119955	236.4	-0.1551178	236.4	-0.1404736	236.4	-0.2071686	236.4	-0.1590166	236.4	-0.1693602	236.4	-0.175216	236.4	-0.1495835	236.4	-0.1369853	236.4	-0.1370395
236.6	1.31092	236.6	1.193379	236.6	1.155148	236.6	1.144758	236.6	1.042775	236.6	1.065356	236.6	1.113478	236.6	-0.1522144	236.6	-0.1456265	236.6	-0.2020602	236.6	-0.1606792	236.6	-0.1690347	236.6	-0.1724182	236.6	-0.150881	236.6	-0.1375038	236.6	-0.1416528
236.8	1.31615	236.8	1.192311	236.8	1.159504	236.8	1.139352	236.8	1.050186	236.8	1.060106	236.8	1.121361	236.8	-0.1485434	236.8	-0.1409633	236.8	-0.203949	236.8	-0.1579943	236.8	-0.1683972	236.8	-0.1767929	236.8	-0.1478478	236.8	-0.1385269	236.8	-0.1404611
237	1.319687	237	1.198199	237	1.160214	237	1.148942	237	1.045037	237	1.061159	237	1.117742	237	-0.1546648	237	-0.1440141	237	-0.2019332	237	-0.157662	237	-0.1681312	237	-0.1777133	237	-0.1476511	237	-0.1352497	237	-0.1371024
237.2	1.313918	237.2	1.196836	237.2	1.162094	237.2	1.152883	237.2	1.044522	237.2	1.062014	237.2	1.119189	237.2	-0.1512294	237.2	-0.1447853	237.2	-0.2028464	237.2	-0.1593163	237.2	-0.1698805	237.2	-0.1765945	237.2	-0.1443985	237.2	-0.1372849	237.2	-0.1405243
237.4	1.31696	237.4	1.202218	237.4	1.161449	237.4	1.149266	237.4	1.045385	237.4	1.063145	237.4	1.114535	237.4	-0.1529796	237.4	-0.1405415	237.4	-0.1978141	237.4	-0.1569386	237.4	-0.1665727	237.4	-0.1763102	237.4	-0.1461639	237.4	-0.1406917	237.4	-0.1313017
237.6	1.318922	237.6	1.196669	237.6	1.159239	237.6	1.152554	237.6	1.04362	237.6	1.063661	237.6	1.120201	237.6	-0.1532778	237.6	-0.1428276	237.6	-0.200261	237.6	-0.1569849	237.6	-0.16692	237.6	-0.1786751	237.6	-0.1471539	237.6	-0.1400085	237.6	-0.1363484
237.8	1.320336	237.8	1.197564	237.8	1.160601	237.8	1.153608	237.8	1.05059	237.8	1.061609	237.8	1.122557	237.8	-0.1555435	237.8	-0.141004	237.8	-0.2013889	237.8	-0.155887	237.8	-0.1700864	237.8	-0.1768099	237.8	-0.1462396	237.8	-0.1393226	237.8	-0.1394855
238	1.316878	238	1.205197	238	1.164589	238	1.150889	238	1.044394	238	1.064175	238	1.12064	238	-0.157248	238	-0.1395085	238	-0.2011124	238	-0.1602629	238	-0.1712156	238	-0.1797218	238	-0.1430094	238	-0.1375548	238	-0.1359423
238.2	1.318121	238.2	1.203466	238.2	1.160011	238.2	1.148031	238.2	1.043503	238.2	1.06654	238.2	1.120576	238.2	-0.1565487	238.2	-0.1391469	238.2	-0.1999348	238.2	-0.1576215	238.2	-0.170733	238.2	-0.178759	238.2	-0.1437297	238.2	-0.1364378	238.2	-0.1386618
238.4	1.324178	238.4	1.201673	238.4	1.16385	238.4	1.148648	238.4	1.045101	238.4	1.06683	238.4	1.122971	238.4	-0.1563502	238.4	-0.138057	238.4	-0.1996132	238.4	-0.1604791	238.4	-0.1675449	238.4	-0.1762226	238.4	-0.1425036	238.4	-0.1408412	238.4	-0.1341196
238.6	1.319971	238.6	1.201097	238.6	1.166418	238.6	1.149746	238.6	1.043846	238.6	1.06837	238.6	1.118426	238.6	-0.1513742	238.6	-0.1384039	238.6	-0.2040939	238.6	-0.1584193	238.6	-0.1629872	238.6	-0.1777722	238.6	-0.1462137	238.6	-0.1425998	238.6	-0.1345047
238.8	1.321719	238.8	1.198251	238.8	1.164777	238.8	1.155525	238.8	1.04982	238.8	1.069328	238.8	1.123953	238.8	-0.1533188	238.8	-0.1400905	238.8	-0.1990049	238.8	-0.1573243	238.8	-0.166789	238.8	-0.1772841	238.8	-0.1466991	238.8	-0.1376342	238.8	-0.1327298
239	1.322923	239	1.205533	239	1.16304	239	1.149482	239	1.049009	239	1.063875	239	1.120345	239	-0.1503478	239	-0.1379289	239	-0.205577	239	-0.1590999	239	-0.1680799	239	-0.1766264	239	-0.1450557	239	-0.1383948	239	-0.1417222
239.2	1.323035	239.2	1.208275	239.2	1.173131	239.2	1.149331	239.2	1.045987	239.2	1.06964	239.2	1.116456	239.2	-0.1542313	239.2	-0.137587	239.2	-0.2022717	239.2	-0.1576688	239.2	-0.1676801	239.2	-0.177273	239.2	-0.1426062	239.2	-0.1329725	239.2	-0.1369662
239.4	1.327254	239.4	1.203066	239.4	1.163215	239.4	1.150825	239.4	1.050777	239.4	1.065249	239.4	1.117616	239.4	-0.1547824	239.4	-0.1408233	239.4	-0.2015143	239.4	-0.157187	239.4	-0.1666839	239.4	-0.1782921	239.4	-0.1417434	239.4	-0.1346808	239.4	-0.1330513
239.6	1.323774	239.6	1.210129	239.6	1.16815	239.6	1.152115	239.6	1.048372	239.6	1.067426	239.6	1.121397	239.6	-0.1508388	239.6	-0.1367974	239.6	-0.2017743	239.6	-0.1578215	239.6	-0.1687352	239.6	-0.1775379	239.6	-0.1402254	239.6	-0.1403485	239.6	-0.1342223
239.8	1.331418	239.8	1.210903	239.8	1.169891	239.8	1.152604	239.8	1.051849	239.8	1.066724	239.8	1.122493	239.8	-0.1578236	239.8	-0.1397836	239.8	-0.2003019	239.8	-0.1580304	239.8	-0.1678528	239.8	-0.1777557	239.8	-0.1423508	239.8	-0.1346274	239.8	-0.1309381
240	1.329481	240	1.207274	240	1.170705	240	1.153214	240	1.053659	240	1.065401	240	1.123791	240	-0.1541403	240	-0.1387653	240	-0.1994504	240	-0.1553573	240	-0.170319	240	-0.1781277	240	-0.1461606	240	-0.1367609	240	-0.1352635
240.2	1.325538	240.2	1.206392	240.2	1.176139	240.2	1.161713	240.2	1.051343	240.2	1.068088	240.2	1.123934	240.2	-0.1516307	240.2	-0.1402973	240.2	-0.2021438	240.2	-0.1574623	240.2	-0.1666518	240.2	-0.1767398	240.2	-0.1450179	240.2	-0.1371743	240.2	-0.1392268
240.4	1.328833	240.4	1.211779	240.4	1.167872	240.4	1.1555	240.4	1.052317	240.4	1.0703	240.4	1.126588	240.4	-0.1499368	240.4	-0.1398809	240.4	-0.2013626	240.4	-0.1559416	240.4	-0.1682856	240.4	-0.170249	240.4	-0.1423602	240.4	-0.1382914	240.4	-0.1380325
240.6	1.329274	240.6	1.209351	240.6	1.172055	240.6	1.157619	240.6	1.053516	240.6	1.067014	240.6	1.117563	240.6	-0.1489496	240.6	-0.1388346	240.6	-0.1964855	240.6	-0.1576331	240.6	-0.1673684	240.6	-0.1738321	240.6	-0.1403353	240.6	-0.1401257	240.6	-0.1386391
240.8	1.330134	240.8	1.210937	240.8	1.176778	240.8	1.15288	240.8	1.05242	240.8	1.071124	240.8	1.117215	240.8	-0.1500838	240.8	-0.1375287	240.8	-0.2012928	240.8	-0.1578925	240.8	-0.1641915	240.8	-0.175229	240.8	-0.1430834	240.8	-0.1336899	240.8	-0.1381553
241	1.33146	241	1.210541	241	1.170977	241	1.16012	241	1.052082	241	1.068973	241	1.123101	241	-0.1485389	241	-0.1419362	241	-0.2001395	241	-0.1561386	241	-0.1675478	241	-0.1736891	241	-0.1380838	241	-0.1362904	241	-0.1352756
241.2	1.335086	241.2	1.209247	241.2	1.172294	241.2	1.158583	241.2	1.051227	241.2	1.067644	241.2	1.128832	241.2	-0.1530331	241.2	-0.1369723	241.2	-0.1945556	241.2	-0.1587176	241.2	-0.1660274	241.2	-0.1743625	241.2	-0.1442537	241.2	-0.1386277	241.2	-0.1365089
241.4	1.332498	241.4	1.213501	241.4	1.177007	241.4	1.158941	241.4	1.051976	241.4	1.073526	241.4	1.125149	241.4	-0.1504395	241.4	-0.13685	241.4	-0.196861	241.4	-0.1557224	241.4	-0.1671212	241.4	-0.172823	241.4	-0.1443016	241.4	-0.1402124	241.4	-0.1380586
241.6	1.331668	241.6	1.21518	241.6	1.175279	241.6	1.158667	241.6	1.04963	241.6	1.07219	241.6	1.127506	241.6	-0.1505344	241.6	-0.139351	241.6	-0.2021403	241.6	-0.1567329	241.6	-0.1640889	241.6	-0.1781603	241.6	-0.1448576	241.6	-0.1328854	241.6	-0.1382372
241.8	1.332955	241.8	1.213752	241.8	1.179484	241.8	1.162774	241.8	1.055217	241.8	1.071843	241.8	1.124312	241.8	-0.152931	241.8	-0.1391018	241.8	-0.1988679	241.8	-0.1543896	241.8	-0.1662826	241.8	-0.17486	241.8	-0.1479825	241.8	-0.1329499	241.8	-0.1363648
242	1.337848	242	1.215753	242	1.178664	242	1.16255	242	1.053577	242	1.072172	242	1.119145	242	-0.1480517	242	-0.1380985	242	-0.1993788	242	-0.1564085	242	-0.1650272	242	-0.1753454	242	-0.1406447	242	-0.1368735	242	-0.1308514
242.2	1.336249	242.2	1.215001	242.2	1.179718	242.2	1.163918	242.2	1.055526	242.2	1.069632	242.2	1.124471	242.2	-0.149379	242.2	-0.1452987	242.2	-0.1986103	242.2	-0.1558892	242.2	-0.1648056	242.2	-0.1729281	242.2	-0.1445255	242.2	-0.1361243	242.2	-0.1396067
242.4	1.340634	242.4	1.217183	242.4	1.172123	242.4	1.163945	242.4	1.050807	242.4	1.07178	242.4	1.122923	242.4	-0.1530804	242.4	-0.1355295	242.4	-0.1991448	242.4	-0.1554086	242.4	-0.1664406	242.4	-0.1803699	242.4	-0.1452344	242.4	-0.1385124	242.4	-0.1345368
242.6	1.337601	242.6	1.218554	242.6	1.1771	242.6	1.163097	242.6	1.05577	242.6	1.071329	242.6	1.125401	242.6	-0.147972	242.6	-0.1340873	242.6	-0.1980764	242.6	-0.1537333	242.6	-0.1678491	242.6	-0.1791577	242.6	-0.1495448	242.6	-0.1359118	242.6	-0.1323965
242.8	1.338287	242.8	1.217052	242.8	1.179389	242.8	1.168288	242.8	1.06002	242.8	1.073021	242.8	1.127138	242.8	-0.1509093	242.8	-0.1384771	242.8	-0.2031711	242.8	-0.1522868	242.8	-0.1655353	242.8	-0.1718092	242.8	-0.1440304	242.8	-0.1341635	242.8	-0.1372185
243	1.341255	243	1.217274	243	1.182069	243	1.163148	243	1.057748	243	1.071515	243	1.127345	243	-0.1495048	243	-0.1375895	243	-0.1994101	243	-0.1525654	243	-0.161021	243	-0.1757	243	-0.1424101	243	-0.1345547	243	-0.139232
243.2	1.340528	243.2	1.222111	243.2	1.181026	243.2	1.162652	243.2	1.054476	243.2	1.069681	243.2	1.123767	243.2	-0.1408185	243.2	-0.1381431	243.2	-0.1954414	243.2	-0.1539677	243.2	-0.1658334	243.2	-0.1755362	243.2	-0.1398895	243.2	-0.1328354	243.2	-0.138092
243.4	1.346119	243.4	1.221333	243.4	1.178581	243.4	1.164925	243.4	1.056515	243.4	1.075217	243.4	1.126202	243.4	-0.1509152	243.4	-0.1377411	243.4	-0.1912069	243.4	-0.1531582	243.4	-0.1660575	243.4	-0.1739902	243.4	-0.1386236	243.4	-0.1320444	243.4	-0.1330669
243.6	1.344599	243.6	1.22019	243.6	1.18744	243.6	1.165829	243.6	1.05852	243.6	1.073794	243.6	1.126981	243.6	-0.1486305	243.6	-0.136832	243.6	-0.1934165	243.6	-0.1536249	243.6	-0.1666603	243.6	-0.1728306	243.6	-0.14537	243.6	-0.1360598	243.6	-0.1387667
243.8	1.343345	243.8	1.220648	243.8	1.178042	243.8	1.163053	243.8	1.055419	243.8	1.073937	243.8	1.126987	243.8	-0.1501916	243.8	-0.1407731	243.8	-0.1959163	243.8	-0.1552794	243.8	-0.1649131	243.8	-0.1738162	243.8	-0.1376069	243.8	-0.135022	243.8	-0.13548
244	1.342828	244	1.223263	244	1.183682	244	1.166567	244	1.058821	244	1.072313	244	1.127594	244	-0.1453395	244	-0.1385037	244	-0.1962881	244	-0.1556596	244	-0.1642168	244	-0.1740287	244	-0.1432741	244	-0.1358676	244	-0.1330823
244.2	1.343014	244.2	1.226381	244.2	1.182178	244.2	1.165422	244.2	1.057483	244.2	1.072007	244.2	1.125271	244.2	-0.1487139	244.2	-0.1395569	244.2	-0.1983412	244.2	-0.1556225	244.2	-0.16618	244.2	-0.1739696	244.2	-0.1464246	244.2	-0.1367598	244.2	-0.1325368
244.4	1.34359	244.4	1.221981	244.4	1.185058	244.4	1.168561	244.4	1.060193	244.4	1.074999	244.4	1.128317	244.4	-0.1472292	244.4	-0.1342374	244.4	-0.1965085	244.4	-0.1531451	244.4	-0.1661701	244.4	-0.1705971	244.4	-0.1405134	244.4	-0.1348836	244.4	-0.1360944
244.6	1.346054	244.6	1.218101	244.6	1.185573	244.6	1.169211	244.6	1.058818	244.6	1.076189	244.6	1.127667	244.6	-0.1502386	244.6	-0.1340612	244.6	-0.1984519	244.6	-0.1485634	244.6	-0.1693036	244.6	-0.1789127	244.6	-0.1365272	244.6	-0.1356853	244.6	-0.1353708
244.8	1.345824	244.8	1.223525	244.8	1.185117	244.8	1.172628	244.8	1.060366	244.8	1.073416	244.8	1.129306	244.8	-0.1449865	244.8	-0.1363812	244.8	-0.1951826	244.8	-0.1569712	244.8	-0.1650872	244.8	-0.1776346	244.8	-0.1365507	244.8	-0.1317033	244.8	-0.1337235
245	1.339845	245	1.229617	245	1.186628	245	1.16779	245	1.058037	245	1.076662	245	1.128173	245	-0.1447934	245	-0.1354931	245	-0.1962099	245	-0.1571682	245	-0.1654264	245	-0.1727206	245	-0.138699	245	-0.1323361	245	-0.1335689
245.2	1.346533	245.2	1.224297	245.2	1.184506	245.2	1.166205	245.2	1.06145	245.2	1.08045	245.2	1.127164	245.2	-0.15075	245.2	-0.1351257	245.2	-0.1944651	245.2	-0.1553936	245.2	-0.1663191	245.2	-0.1726497	245.2	-0.1413877	245.2	-0.1345454	245.2	-0.1333037
245.4	1.350998	245.4	1.226939	245.4	1.190649	245.4	1.16788	245.4	1.062685	245.4	1.079148	245.4	1.12116	245.4	-0.1488789	245.4	-0.1330567	245.4	-0.1943137	245.4	-0.1511992	245.4	-0.1602515	245.4	-0.1697332	245.4	-0.1377741	245.4	-0.1349138	245.4	-0.1301786
245.6	1.347357	245.6	1.229889	245.6	1.187166	245.6	1.17435	245.6	1.062461	245.6	1.073808	245.6	1.127759	245.6	-0.1469136	245.6	-0.1351926	245.6	-0.1958447	245.6	-0.1479468	245.6	-0.1628877	245.6	-0.1736454	245.6	-0.1394095	245.6	-0.133338	245.6	-0.1330235
245.8	1.347297	245.8	1.227069	245.8	1.190544	245.8	1.171047	245.8	1.063286	245.8	1.076294	245.8	1.127592	245.8	-0.1495849	245.8	-0.134059	245.8	-0.1995151	245.8	-0.1552072	245.8	-0.162249	245.8	-0.1722612	245.8	-0.1383628	245.8	-0.1336964	245.8	-0.1335412
246	1.346285	246	1.228298	246	1.194109	246	1.173555	246	1.065411	246	1.078438	246	1.130805	246	-0.1445304	246	-0.1311392	246	-0.1958541	246	-0.1556595	246	-0.1632128	246	-0.1718328	246	-0.1388726	246	-0.1333717	246	-0.1354577
246.2	1.354095	246.2	1.22712	246.2	1.193137	246.2	1.171037	246.2	1.06582	246.2	1.076088	246.2	1.128538	246.2	-0.1463121	246.2	-0.1366813	246.2	-0.1947096	246.2	-0.1535301	246.2	-0.1638867	246.2	-0.1757575	246.2	-0.1360212	246.2	-0.1343527	246.2	-0.1321472
246.4	1.355272	246.4	1.230106	246.4	1.187085	246.4	1.171148	246.4	1.062448	246.4	1.079173	246.4	1.130482	246.4	-0.145753	246.4	-0.1382364	246.4	-0.1982396	246.4	-0.1558104	246.4	-0.1625814	246.4	-0.1704568	246.4	-0.1380574	246.4	-0.1365099	246.4	-0.1325386
246.6	1.355426	246.6	1.229487	246.6	1.189184	246.6	1.177449	246.6	1.063067	246.6	1.076414	246.6	1.137818	246.6	-0.1506697	246.6	-0.1362164	246.6	-0.19267	246.6	-0.1538229	246.6	-0.1562935	246.6	-0.1727687	246.6	-0.1372424	246.6	-0.1306184	246.6	-0.1359684
246.8	1.353576	246.8	1.230794	246.8	1.192291	246.8	1.174916	246.8	1.064432	246.8	1.075916	246.8	1.129902	246.8	-0.1456834	246.8	-0.1318407	246.8	-0.1931887	246.8	-0.1558517	246.8	-0.1629433	246.8	-0.1711605	246.8	-0.1345907	246.8	-0.1336191	246.8	-0.1342267
247	1.357866	247	1.230956	247	1.191973	247	1.174004	247	1.06398	247	1.076913	247	1.131676	247	-0.1451676	247	-0.1358178	247	-0.1995766	247	-0.1549143	247	-0.1598251	247	-0.1783705	247	-0.1367984	247	-0.1374664	247	-0.1309932
247.2	1.3532	247.2	1.235172	247.2	1.190329	247.2	1.175522	247.2	1.063628	247.2	1.082887	247.2	1.130309	247.2	-0.1464238	247.2	-0.1355128	247.2	-0.198145	247.2	-0.156777	247.2	-0.1625644	247.2	-0.1731187	247.2	-0.1428751	247.2	-0.1401079	247.2	-0.132052
247.4	1.350841	247.4	1.232525	247.4	1.191616	247.4	1.175254	247.4	1.064997	247.4	1.079492	247.4	1.132128	247.4	-0.1478813	247.4	-0.1377249	247.4	-0.1967709	247.4	-0.1505285	247.4	-0.159356	247.4	-0.172488	247.4	-0.1381463	247.4	-0.1326789	247.4	-0.1333918
247.6	1.356627	247.6	1.234425	247.6	1.188634	247.6	1.174086	247.6	1.066897	247.6	1.07846	247.6	1.126791	247.6	-0.1457009	247.6	-0.1412185	247.6	-0.196296	247.6	-0.1500225	247.6	-0.1583918	247.6	-0.1735229	247.6	-0.1392185	247.6	-0.1336979	247.6	-0.13357
247.8	1.357557	247.8	1.231734	247.8	1.194937	247.8	1.180665	247.8	1.066259	247.8	1.082153	247.8	1.133824	247.8	-0.1427966	247.8	-0.1374535	247.8	-0.1916514	247.8	-0.1512678	247.8	-0.1604118	247.8	-0.175631	247.8	-0.1375581	247.8	-0.1377819	247.8	-0.1330289
248	1.356601	248	1.232849	248	1.195591	248	1.180857	248	1.068839	248	1.080579	248	1.135567	248	-0.1419583	248	-0.1337937	248	-0.1983277	248	-0.1544468	248	-0.1612795	248	-0.1725568	248	-0.136371	248	-0.1348073	248	-0.1266497
248.2	1.35854	248.2	1.232964	248.2	1.199582	248.2	1.17792	248.2	1.069802	248.2	1.082518	248.2	1.131813	248.2	-0.1377957	248.2	-0.1347952	248.2	-0.1933534	248.2	-0.1553546	248.2	-0.1675229	248.2	-0.1698276	248.2	-0.1372654	248.2	-0.1359002	248.2	-0.1336702
248.4	1.354032	248.4	1.240888	248.4	1.197692	248.4	1.17566	248.4	1.06892	248.4	1.085853	248.4	1.135448	248.4	-0.1456934	248.4	-0.1327222	248.4	-0.1907067	248.4	-0.1548731	248.4	-0.1603498	248.4	-0.1714208	248.4	-0.1378471	248.4	-0.1335516	248.4	-0.1342013
248.6	1.35796	248.6	1.234186	248.6	1.198699	248.6	1.179983	248.6	1.069854	248.6	1.07987	248.6	1.129569	248.6	-0.1464673	248.6	-0.1317729	248.6	-0.1911606	248.6	-0.1538664	248.6	-0.1625284	248.6	-0.1735821	248.6	-0.1397243	248.6	-0.1361831	248.6	-0.1272948
248.8	1.363891	248.8	1.235397	248.8	1.197047	248.8	1.178116	248.8	1.063076	248.8	1.078405	248.8	1.130902	248.8	-0.1434686	248.8	-0.1356397	248.8	-0.1938466	248.8	-0.1519027	248.8	-0.1636254	248.8	-0.1711078	248.8	-0.1358351	248.8	-0.1352119	248.8	-0.1294863
249	1.358911	249	1.23495	249	1.197506	249	1.178513	249	1.070348	249	1.082445	249	1.131877	249	-0.1422653	249	-0.1317792	249	-0.1925646	249	-0.147861	249	-0.1599471	249	-0.172432	249	-0.1394517	249	-0.1294623	249	-0.1281341
249.2	1.362716	249.2	1.240819	249.2	1.19844	249.2	1.179152	249.2	1.06471	249.2	1.082459	249.2	1.130728	249.2	-0.1435187	249.2	-0.1348227	249.2	-0.1953759	249.2	-0.1548122	249.2	-0.1623068	249.2	-0.1691099	249.2	-0.1351665	249.2	-0.1330447	249.2	-0.1312413
249.4	1.365641	249.4	1.242399	249.4	1.194604	249.4	1.185978	249.4	1.070255	249.4	1.083218	249.4	1.135952	249.4	-0.1477243	249.4	-0.1375319	249.4	-0.1964325	249.4	-0.1506721	249.4	-0.1634019	249.4	-0.1685405	249.4	-0.1390876	249.4	-0.131709	249.4	-0.1331213
249.6	1.364239	249.6	1.244868	249.6	1.20478	249.6	1.178405	249.6	1.071062	249.6	1.086594	249.6	1.131819	249.6	-0.1415886	249.6	-0.1338306	249.6	-0.1923776	249.6	-0.1547199	249.6	-0.1572563	249.6	-0.17587	249.6	-0.1368656	249.6	-0.1299273	249.6	-0.1334395
249.8	1.360567	249.8	1.239208	249.8	1.199432	249.8	1.180576	249.8	1.069296	249.8	1.086838	249.8	1.13667	249.8	-0.1400508	249.8	-0.1354174	249.8	-0.1929582	249.8	-0.152691	249.8	-0.160749	249.8	-0.1708805	249.8	-0.136963	249.8	-0.1303257	249.8	-0.129008
250	1.361547	250	1.244751	250	1.204072	250	1.18639	250	1.070595	250	1.084892	250	1.134277	250	-0.1461904	250	-0.1309005	250	-0.1950809	250	-0.1516606	250	-0.156667	250	-0.1736313	250	-0.1354548	250	-0.1310366	250	-0.1282187
250.2	1.360653	250.2	1.244776	250.2	1.202241	250.2	1.186318	250.2	1.070335	250.2	1.084934	250.2	1.134502	250.2	-0.1436742	250.2	-0.1350434	250.2	-0.1939808	250.2	-0.1496086	250.2	-0.1584021	250.2	-0.1745575	250.2	-0.1320441	250.2	-0.1322822	250.2	-0.1315735
250.4	1.364138	250.4	1.243644	250.4	1.201902	250.4	1.185154	250.4	1.067925	250.4	1.083862	250.4	1.133968	250.4	-0.1440573	250.4	-0.1338154	250.4	-0.1925732	250.4	-0.1449855	250.4	-0.156913	250.4	-0.1767954	250.4	-0.1340324	250.4	-0.1290029	250.4	-0.1329346
250.6	1.363396	250.6	1.244201	250.6	1.202832	250.6	1.181672	250.6	1.074416	250.6	1.083346	250.6	1.129695	250.6	-0.1404862	250.61	-0.133239	250.61	-0.1939018	250.61	-0.1518005	250.61	-0.1582886	250.61	-0.1727738	250.61	-0.1349683	250.61	-0.1327281	250.61	-0.1317988
250.8	1.371928	250.8	1.241655	250.8	1.203098	250.8	1.184917	250.8	1.074051	250.8	1.083806	250.8	1.131537	250.8	-0.1447563	250.8	-0.1321858	250.8	-0.1930305	250.8	-0.1501491	250.8	-0.1577445	250.8	-0.1738631	250.8	-0.1389473	250.8	-0.1304963	250.8	-0.1320013
251	1.367184	251	1.247163	251	1.203026	251	1.187196	251	1.070708	251	1.084509	251	1.134819	251	-0.1379041	251	-0.1333763	251	-0.1949776	251	-0.1511288	251	-0.1580626	251	-0.1684943	251	-0.1338503	251	-0.1312556	251	-0.1293576
251.2	1.367048	251.2	1.241369	251.2	1.202879	251.2	1.186871	251.2	1.073643	251.2	1.078893	251.2	1.133679	251.2	-0.1411708	251.2	-0.136055	251.2	-0.1943193	251.2	-0.1502007	251.2	-0.1623208	251.2	-0.1679398	251.2	-0.1325269	251.2	-0.1312034	251.2	-0.1328634
251.4	1.369596	251.4	1.243619	251.4	1.207984	251.4	1.187472	251.4	1.071791	251.4	1.085223	251.4	1.132496	251.4	-0.1459155	251.4	-0.1297716	251.4	-0.1934015	251.4	-0.1501033	251.4	-0.1599332	251.4	-0.173762	251.4	-0.1354841	251.4	-0.1334588	251.4	-0.1313768
251.6	1.367817	251.6	1.246667	251.6	1.212232	251.6	1.184571	251.6	1.073282	251.6	1.086593	251.6	1.141191	251.6	-0.1406818	251.6	-0.1355035	251.6	-0.1961938	251.6	-0.1514342	251.6	-0.1575295	251.6	-0.1745779	251.6	-0.135293	251.6	-0.1308046	251.6	-0.1303105
251.8	1.371256	251.8	1.246758	251.8	1.206964	251.8	1.190489	251.8	1.076684	251.8	1.081963	251.8	1.134188	251.8	-0.139071	251.8	-0.1317751	251.8	-0.1977195	251.8	-0.1521413	251.8	-0.160485	251.8	-0.1692971	251.8	-0.1364629	251.8	-0.1329148	251.8	-0.1293345
252	1.371814	252	1.246993	252	1.210878	252	1.187243	252	1.074493	252	1.082352	252	1.136158	252	-0.1365768	252	-0.1369214	252	-0.194572	252	-0.148987	252	-0.1594764	252	-0.1762526	252	-0.1371765	252	-0.1317689	252	-0.1311281
252.2	1.367329	252.2	1.246001	252.2	1.208288	252.2	1.192653	252.2	1.073933	252.2	1.089448	252.2	1.132753	252.2	-0.1434858	252.2	-0.1340766	252.2	-0.1944346	252.2	-0.1537739	252.2	-0.1600754	252.2	-0.1723126	252.2	-0.1350339	252.2	-0.1280419	252.2	-0.1295408
252.4	1.370844	252.4	1.252389	252.4	1.210411	252.4	1.190731	252.4	1.075958	252.4	1.08645	252.4	1.135878	252.4	-0.1383936	252.4	-0.130736	252.4	-0.1922686	252.4	-0.1476358	252.4	-0.161195	252.4	-0.1740282	252.4	-0.1340768	252.4	-0.1327297	252.4	-0.1289595
252.6	1.368486	252.6	1.249571	252.6	1.213236	252.6	1.186159	252.6	1.073161	252.6	1.088737	252.6	1.140447	252.6	-0.1411257	252.6	-0.1330637	252.6	-0.197941	252.6	-0.1477917	252.6	-0.1591475	252.6	-0.1691114	252.6	-0.1352943	252.6	-0.1341965	252.6	-0.1300883
252.8	1.374384	252.8	1.249819	252.8	1.210094	252.8	1.189542	252.8	1.074496	252.8	1.088473	252.8	1.136991	252.8	-0.1448672	252.8	-0.1373305	252.8	-0.1915226	252.8	-0.1495654	252.8	-0.159811	252.8	-0.1707958	252.8	-0.1352524	252.8	-0.1321169	252.8	-0.1322756
253	1.371972	253	1.249038	253	1.209657	253	1.192568	253	1.078802	253	1.09072	253	1.135759	253	-0.144365	253	-0.1337668	253	-0.1885827	253	-0.1516144	253	-0.1623054	253	-0.1694986	253	-0.1354468	253	-0.1277253	253	-0.1259008
253.2	1.372849	253.2	1.252504	253.2	1.211258	253.2	1.186837	253.2	1.073546	253.2	1.089025	253.2	1.133667	253.2	-0.139193	253.2	-0.1315076	253.2	-0.1891958	253.2	-0.1497728	253.2	-0.1619827	253.2	-0.1712649	253.2	-0.1322529	253.2	-0.1268526	253.2	-0.1256415
253.4	1.372828	253.4	1.254351	253.4	1.213762	253.4	1.186792	253.4	1.077479	253.4	1.089473	253.4	1.137136	253.4	-0.1438908	253.4	-0.1296098	253.4	-0.191385	253.4	-0.1437901	253.4	-0.1538669	253.4	-0.1719118	253.4	-0.1306965	253.4	-0.1289253	253.4	-0.1279539
253.6	1.370171	253.6	1.252498	253.6	1.210457	253.6	1.19263	253.6	1.078271	253.6	1.085563	253.6	1.137508	253.6	-0.1405351	253.6	-0.132987	253.6	-0.1906395	253.6	-0.1442061	253.6	-0.1604776	253.6	-0.1739716	253.6	-0.1345235	253.6	-0.1280684	253.6	-0.1264406
253.8	1.37403	253.8	1.255935	253.8	1.215868	253.8	1.193673	253.8	1.077892	253.8	1.08744	253.8	1.134407	253.8	-0.1426071	253.8	-0.1309709	253.8	-0.1928794	253.8	-0.1464681	253.8	-0.1585866	253.8	-0.1661752	253.8	-0.1346934	253.8	-0.1282686	253.8	-0.1264988
254	1.374044	254	1.255185	254	1.216165	254	1.19219	254	1.0783	254	1.088426	254	1.136894	254	-0.1427414	254	-0.1313028	254	-0.1906051	254	-0.1486465	254	-0.1621227	254	-0.1674927	254	-0.1370225	254	-0.1292532	254	-0.1298061
254.2	1.374468	254.2	1.254464	254.2	1.216436	254.2	1.188602	254.2	1.077542	254.2	1.090798	254.2	1.1366	254.2	-0.1421916	254.2	-0.1294689	254.2	-0.1940718	254.2	-0.1445467	254.2	-0.1604918	254.2	-0.1720859	254.2	-0.1386438	254.2	-0.1282773	254.2	-0.1259349
254.4	1.377666	254.4	1.256818	254.4	1.216917	254.4	1.196886	254.4	1.081273	254.4	1.093052	254.4	1.140823	254.4	-0.1370893	254.4	-0.1321626	254.4	-0.1894757	254.4	-0.1500301	254.4	-0.1568289	254.4	-0.1688393	254.4	-0.1378336	254.4	-0.1294496	254.4	-0.1342007
254.6	1.369114	254.6	1.259216	254.6	1.214717	254.6	1.194261	254.6	1.077329	254.6	1.090006	254.6	1.134282	254.6	-0.1418446	254.6	-0.1317258	254.6	-0.1924079	254.6	-0.1505013	254.6	-0.1516009	254.6	-0.1730908	254.6	-0.1335071	254.6	-0.127083	254.6	-0.1285507
254.8	1.375315	254.8	1.2547	254.8	1.21803	254.8	1.196612	254.8	1.085068	254.8	1.093189	254.8	1.141662	254.8	-0.139619	254.8	-0.1299146	254.8	-0.1947961	254.8	-0.146579	254.8	-0.1524025	254.8	-0.1700249	254.8	-0.1321901	254.8	-0.1317205	254.8	-0.1304196
255	1.382393	255	1.262067	255	1.213526	255	1.192173	255	1.086374	255	1.090688	255	1.139108	255	-0.1415604	255	-0.1309864	255	-0.1931936	255	-0.1467201	255	-0.15916	255	-0.1706329	255	-0.1309316	255	-0.1328039	255	-0.1303464
255.2	1.380134	255.2	1.261329	255.2	1.214145	255.2	1.197227	255.2	1.080714	255.2	1.092486	255.2	1.141319	255.2	-0.142349	255.2	-0.1313654	255.2	-0.1926269	255.2	-0.1476852	255.2	-0.1502994	255.2	-0.1692106	255.2	-0.1324865	255.2	-0.1311126	255.2	-0.1252025
255.4	1.376957	255.4	1.257792	255.4	1.215138	255.4	1.1989	255.4	1.083385	255.4	1.088197	255.4	1.13935	255.4	-0.1358426	255.4	-0.1309612	255.4	-0.1879317	255.4	-0.1485885	255.4	-0.1557125	255.4	-0.1724268	255.4	-0.1311804	255.4	-0.1291445	255.4	-0.1263924
255.6	1.375163	255.6	1.261318	255.6	1.217764	255.6	1.193658	255.6	1.076977	255.6	1.089803	255.6	1.140328	255.6	-0.1400128	255.6	-0.1332996	255.6	-0.1936705	255.6	-0.1501848	255.6	-0.1572095	255.6	-0.1700595	255.6	-0.1332527	255.6	-0.1283434	255.6	-0.1274387
255.8	1.382988	255.8	1.260255	255.8	1.218702	255.8	1.19614	255.8	1.081935	255.8	1.090796	255.8	1.138457	255.8	-0.1389872	255.8	-0.1310848	255.8	-0.1951882	255.8	-0.150224	255.8	-0.1549845	255.8	-0.1733841	255.8	-0.1344832	255.8	-0.1249715	255.8	-0.1299991
256	1.385595	256	1.260088	256	1.218398	256	1.201214	256	1.07909	256	1.09197	256	1.137273	256	-0.1419707	256	-0.128989	256	-0.193303	256	-0.149478	256	-0.1609232	256	-0.1720643	256	-0.1337635	256	-0.1271113	256	-0.129615
256.2	1.384653	256.2	1.261327	256.2	1.214822	256.2	1.196466	256.2	1.085235	256.2	1.088177	256.2	1.139359	256.2	-0.1404858	256.2	-0.1288076	256.2	-0.1905743	256.2	-0.1450849	256.2	-0.1575461	256.2	-0.1684226	256.2	-0.1344374	256.2	-0.1264003	256.2	-0.1280258
256.4	1.38035	256.4	1.258791	256.4	1.222199	256.4	1.201721	256.4	1.079298	256.4	1.092442	256.4	1.139965	256.4	-0.134871	256.4	-0.1312144	256.4	-0.1896466	256.4	-0.1481048	256.4	-0.1533881	256.4	-0.1675728	256.4	-0.1318935	256.4	-0.1296802	256.4	-0.1284628
256.6	1.379966	256.6	1.267323	256.6	1.220605	256.6	1.199871	256.6	1.086491	256.6	1.096593	256.6	1.146045	256.6	-0.1407921	256.6	-0.1273576	256.6	-0.1879951	256.6	-0.1489923	256.6	-0.1562981	256.6	-0.1659628	256.6	-0.1311967	256.6	-0.1259709	256.6	-0.1285569
256.8	1.384441	256.8	1.265314	256.8	1.221139	256.8	1.196899	256.8	1.084283	256.8	1.093106	256.8	1.136885	256.8	-0.1408751	256.8	-0.1339756	256.8	-0.1910073	256.8	-0.1476438	256.8	-0.1543372	256.8	-0.166133	256.8	-0.1311597	256.8	-0.1232857	256.8	-0.1293974
257	1.380485	257	1.262287	257	1.22143	257	1.201618	257	1.082168	257	1.093879	257	1.141784	257	-0.1395959	257	-0.1284706	257	-0.1843027	257	-0.1472009	257	-0.1538734	257	-0.167913	257	-0.1355008	257	-0.1300032	257	-0.1299364
257.2	1.382346	257.2	1.269034	257.2	1.221756	257.2	1.198662	257.2	1.080621	257.2	1.092903	257.2	1.142521	257.2	-0.1397161	257.2	-0.1303951	257.2	-0.1893503	257.2	-0.1463389	257.2	-0.1578804	257.2	-0.1722864	257.2	-0.1333537	257.2	-0.129665	257.2	-0.1241261
257.4	1.385468	257.4	1.267514	257.4	1.224316	257.4	1.199694	257.4	1.087739	257.4	1.096392	257.4	1.138986	257.4	-0.1379783	257.4	-0.1268855	257.4	-0.1907459	257.4	-0.150875	257.4	-0.15661	257.4	-0.167637	257.4	-0.131873	257.4	-0.1258768	257.4	-0.1290635
257.6	1.38525	257.6	1.265067	257.6	1.21988	257.6	1.205309	257.6	1.086169	257.6	1.096994	257.6	1.143767	257.6	-0.1347201	257.6	-0.1293429	257.6	-0.1851735	257.6	-0.1450158	257.6	-0.1575598	257.6	-0.1696497	257.6	-0.1347679	257.6	-0.1293407	257.6	-0.1276797
257.8	1.385808	257.8	1.26771	257.8	1.226897	257.8	1.205347	257.8	1.083636	257.8	1.094228	257.8	1.14272	257.8	-0.1375404	257.8	-0.1285186	257.8	-0.188727	257.8	-0.1486147	257.8	-0.1532114	257.8	-0.1683763	257.8	-0.1308457	257.8	-0.1273539	257.8	-0.1285719
258	1.387163	258	1.265182	258	1.225495	258	1.202995	258	1.082357	258	1.093033	258	1.143854	258	-0.1378494	258	-0.1339133	258	-0.1922189	258	-0.1455186	258	-0.1573414	258	-0.1638833	258	-0.1333598	258	-0.1265072	258	-0.1241391
258.2	1.388779	258.2	1.267502	258.2	1.22601	258.2	1.203595	258.2	1.08478	258.2	1.090693	258.2	1.14353	258.2	-0.1346225	258.2	-0.1254192	258.2	-0.1907481	258.2	-0.1471287	258.2	-0.1529872	258.2	-0.1693096	258.2	-0.1315244	258.2	-0.124065	258.2	-0.1261518
258.4	1.386873	258.4	1.265373	258.4	1.225711	258.4	1.202889	258.4	1.086681	258.4	1.096722	258.4	1.141715	258.4	-0.1395914	258.4	-0.1290993	258.4	-0.192197	258.4	-0.1498384	258.4	-0.1568423	258.4	-0.1638714	258.4	-0.1325514	258.4	-0.1209414	258.4	-0.126626
258.6	1.385406	258.6	1.266098	258.6	1.227439	258.6	1.206024	258.6	1.084387	258.6	1.096531	258.6	1.140839	258.6	-0.1382483	258.6	-0.1299541	258.6	-0.1823246	258.6	-0.1469994	258.6	-0.1556493	258.6	-0.1691249	258.6	-0.133337	258.6	-0.1310921	258.6	-0.1273438
258.8	1.383519	258.8	1.268177	258.8	1.22646	258.8	1.200832	258.8	1.086298	258.8	1.093659	258.8	1.141343	258.8	-0.1394612	258.8	-0.1256536	258.8	-0.1909337	258.8	-0.1460943	258.8	-0.1500409	258.8	-0.1708628	258.8	-0.1314286	258.8	-0.1271516	258.8	-0.1248621
259	1.389076	259	1.272684	259	1.226304	259	1.205524	259	1.086195	259	1.097972	259	1.145509	259	-0.1429243	259	-0.1316557	259	-0.1881926	259	-0.1425464	259	-0.157769	259	-0.1702475	259	-0.1319816	259	-0.1263136	259	-0.126068
259.2	1.38944	259.2	1.272391	259.2	1.224705	259.2	1.20898	259.2	1.090421	259.2	1.09725	259.2	1.145974	259.2	-0.1321878	259.2	-0.1306704	259.2	-0.186892	259.2	-0.1460599	259.2	-0.157787	259.2	-0.1725018	259.2	-0.1318399	259.2	-0.1299537	259.2	-0.1257374
259.4	1.388017	259.4	1.270473	259.4	1.229794	259.4	1.203678	259.4	1.087374	259.4	1.096321	259.4	1.144163	259.4	-0.1389912	259.4	-0.1244859	259.4	-0.1856704	259.4	-0.1467382	259.4	-0.1560588	259.4	-0.1685524	259.4	-0.1336973	259.4	-0.1278577	259.4	-0.1247534
259.6	1.390548	259.6	1.273543	259.6	1.231178	259.6	1.207211	259.6	1.088608	259.6	1.09271	259.6	1.14723	259.6	-0.1361918	259.6	-0.1262378	259.6	-0.184859	259.6	-0.1472057	259.6	-0.1576999	259.6	-0.1698198	259.6	-0.1316592	259.6	-0.1294397	259.6	-0.1260082
259.8	1.386743	259.8	1.276843	259.8	1.22874	259.8	1.205479	259.8	1.085763	259.8	1.099518	259.8	1.144701	259.8	-0.1391641	259.8	-0.1275851	259.8	-0.1837783	259.8	-0.1468425	259.8	-0.1556072	259.8	-0.165374	259.8	-0.1276351	259.8	-0.1262591	259.8	-0.1214257
260	1.393379	260	1.271529	260	1.231635	260	1.205847	260	1.08705	260	1.09677	260	1.149509	260	-0.1379932	260	-0.1307668	260	-0.1892467	260	-0.1470941	260	-0.1543677	260	-0.1657762	260	-0.136433	260	-0.1248221	260	-0.130667
260.2	1.393853	260.2	1.272989	260.2	1.23017	260.2	1.20695	260.2	1.085824	260.2	1.100303	260.2	1.143933	260.2	-0.1322104	260.2	-0.1277773	260.2	-0.1934083	260.2	-0.1440369	260.2	-0.1556066	260.2	-0.1673847	260.2	-0.1331922	260.2	-0.1225457	260.2	-0.1249156
260.4	1.391374	260.4	1.274162	260.4	1.234557	260.4	1.212183	260.4	1.092373	260.4	1.095865	260.4	1.145458	260.4	-0.1431262	260.4	-0.125711	260.4	-0.1853571	260.4	-0.1452083	260.4	-0.1561741	260.4	-0.1670128	260.4	-0.130384	260.4	-0.1271018	260.4	-0.1259467
260.6	1.394114	260.6	1.273065	260.6	1.230142	260.6	1.213014	260.6	1.091765	260.6	1.096904	260.6	1.142387	260.6	-0.1366671	260.6	-0.1308414	260.6	-0.1850475	260.6	-0.1474854	260.6	-0.154561	260.6	-0.1696267	260.6	-0.1303344	260.6	-0.1201034	260.6	-0.1279217
260.8	1.39731	260.8	1.272036	260.8	1.231113	260.8	1.209748	260.8	1.088123	260.8	1.100961	260.8	1.145471	260.8	-0.1402397	260.8	-0.1291389	260.8	-0.1881902	260.8	-0.1456597	260.8	-0.1536121	260.8	-0.1697421	260.8	-0.1307911	260.8	-0.1260693	260.8	-0.1245459
261	1.394775	261	1.272897	261	1.232615	261	1.212069	261	1.091792	261	1.097718	261	1.147755	261	-0.1362853	261	-0.1298887	261	-0.1913725	261	-0.144874	261	-0.1572147	261	-0.1682584	261	-0.1321172	261	-0.1251033	261	-0.1266558
261.2	1.394324	261.2	1.275075	261.2	1.233412	261.2	1.208818	261.2	1.091883	261.2	1.100963	261.2	1.146811	261.2	-0.1382276	261.2	-0.131493	261.2	-0.1854809	261.2	-0.1434448	261.2	-0.1521255	261.2	-0.1681772	261.2	-0.1281985	261.2	-0.1291218	261.2	-0.1250308
261.4	1.395733	261.4	1.278356	261.4	1.230573	261.4	1.210454	261.4	1.090493	261.4	1.097969	261.4	1.143836	261.4	-0.1359902	261.4	-0.1269084	261.4	-0.1900996	261.4	-0.1419691	261.4	-0.1527087	261.4	-0.1647093	261.4	-0.1307856	261.4	-0.1251176	261.4	-0.1245597
261.6	1.395471	261.6	1.274927	261.6	1.233025	261.6	1.21642	261.6	1.094957	261.6	1.103113	261.6	1.149803	261.6	-0.1369195	261.6	-0.1290195	261.6	-0.1878549	261.6	-0.143395	261.6	-0.1560542	261.6	-0.1655031	261.6	-0.127618	261.6	-0.1231797	261.6	-0.1233054
261.8	1.398315	261.8	1.275848	261.8	1.232626	261.8	1.214118	261.8	1.091103	261.8	1.102866	261.8	1.143943	261.8	-0.140607	261.8	-0.1272137	261.8	-0.1900471	261.8	-0.1469338	261.8	-0.1511067	261.8	-0.1641834	261.8	-0.1288117	261.8	-0.1267205	261.8	-0.1259264
262	1.399012	262	1.272158	262	1.233857	262	1.210728	262	1.095982	262	1.101538	262	1.145374	262	-0.1335423	262	-0.1248687	262	-0.1887326	262	-0.1438787	262	-0.1547282	262	-0.1692983	262	-0.1275112	262	-0.1275157	262	-0.1250779
262.2	1.398185	262.2	1.283439	262.2	1.236121	262.2	1.212353	262.2	1.090389	262.2	1.099165	262.2	1.144639	262.2	-0.142183	262.2	-0.1321227	262.2	-0.1881018	262.2	-0.1442839	262.2	-0.156187	262.2	-0.168507	262.2	-0.1284706	262.2	-0.1258647	262.2	-0.1265675
262.4	1.400914	262.4	1.278504	262.4	1.232871	262.4	1.20994	262.4	1.094548	262.4	1.10119	262.4	1.14792	262.4	-0.1320864	262.4	-0.1278104	262.4	-0.1877159	262.4	-0.1474286	262.4	-0.1572282	262.4	-0.1657992	262.4	-0.130179	262.4	-0.12203	262.4	-0.1212875
262.6	1.395521	262.6	1.278614	262.6	1.23744	262.6	1.213545	262.6	1.090251	262.6	1.099793	262.6	1.143891	262.6	-0.1381375	262.6	-0.1229958	262.6	-0.1874958	262.6	-0.1397106	262.6	-0.1533626	262.6	-0.1652469	262.6	-0.1338148	262.6	-0.1250915	262.6	-0.1229593
262.8	1.399175	262.8	1.278713	262.8	1.237247	262.8	1.218305	262.8	1.095224	262.8	1.100574	262.8	1.145889	262.8	-0.1363675	262.8	-0.1297628	262.8	-0.1882689	262.8	-0.1404086	262.8	-0.1583703	262.8	-0.165354	262.8	-0.1288944	262.8	-0.118621	262.8	-0.1295456
263	1.39857	263	1.280264	263	1.235885	263	1.211473	263	1.090574	263	1.100267	263	1.145412	263	-0.1365878	263	-0.1308553	263	-0.1894566	263	-0.1456621	263	-0.1538986	263	-0.1703753	263	-0.1268185	263	-0.1231826	263	-0.1241196
263.2	1.393355	263.2	1.280244	263.2	1.238204	263.2	1.213394	263.2	1.094138	263.2	1.101845	263.2	1.147314	263.2	-0.1384567	263.2	-0.1254745	263.2	-0.1915789	263.2	-0.1446109	263.2	-0.1498189	263.2	-0.1674632	263.2	-0.1307231	263.2	-0.1290589	263.2	-0.1228183
263.4	1.399388	263.4	1.281325	263.4	1.234736	263.4	1.21848	263.4	1.092358	263.4	1.096305	263.4	1.147952	263.4	-0.1322846	263.4	-0.1282278	263.4	-0.186126	263.4	-0.1426203	263.4	-0.1541997	263.4	-0.1680546	263.4	-0.1313494	263.4	-0.1236345	263.4	-0.1278008
263.6	1.398594	263.6	1.278381	263.6	1.239511	263.6	1.213591	263.6	1.095603	263.6	1.101063	263.6	1.150584	263.6	-0.1333822	263.6	-0.127245	263.6	-0.1868214	263.6	-0.1463659	263.6	-0.1536487	263.6	-0.1669539	263.6	-0.1283181	263.6	-0.1255293	263.6	-0.1260828
263.8	1.401071	263.8	1.283555	263.8	1.238482	263.8	1.216406	263.8	1.096446	263.8	1.106477	263.8	1.14827	263.8	-0.1328508	263.8	-0.127513	263.8	-0.1900457	263.8	-0.1441818	263.8	-0.1519089	263.8	-0.1660431	263.8	-0.1271479	263.8	-0.1248693	263.8	-0.122912
264	1.400555	264	1.278461	264	1.238382	264	1.219775	264	1.093108	264	1.100978	264	1.149418	264	-0.1322774	264	-0.1301349	264	-0.1884482	264	-0.1469264	264	-0.1526178	264	-0.1657048	264	-0.1307815	264	-0.1238733	264	-0.1244279
264.2	1.400675	264.2	1.283494	264.2	1.24133	264.2	1.217499	264.2	1.097704	264.2	1.102909	264.2	1.147034	264.2	-0.1360261	264.2	-0.1284742	264.2	-0.1847057	264.2	-0.143832	264.2	-0.1532658	264.2	-0.1683669	264.2	-0.1267129	264.2	-0.1232667	264.2	-0.1230156
264.4	1.405578	264.4	1.284953	264.4	1.245173	264.4	1.222387	264.4	1.098971	264.4	1.101529	264.4	1.153902	264.4	-0.1317551	264.4	-0.1274038	264.4	-0.1860715	264.4	-0.1440926	264.4	-0.155978	264.4	-0.1650542	264.4	-0.129195	264.4	-0.1232375	264.4	-0.127543
264.6	1.405362	264.6	1.282547	264.6	1.244523	264.6	1.223025	264.6	1.096915	264.6	1.104672	264.6	1.154497	264.6	-0.1306802	264.6	-0.1240123	264.6	-0.1858674	264.6	-0.1407716	264.6	-0.1517262	264.6	-0.1666575	264.6	-0.1289467	264.6	-0.1273835	264.6	-0.1225771
264.81	1.406012	264.81	1.280179	264.81	1.240955	264.81	1.223657	264.81	1.092345	264.81	1.10516	264.81	1.15028	264.81	-0.1359639	264.8	-0.125808	264.8	-0.1856603	264.8	-0.1475128	264.8	-0.1516687	264.8	-0.1706176	264.8	-0.1290196	264.8	-0.1210675	264.8	-0.1257543
265	1.404167	265	1.285513	265	1.242503	265	1.222295	265	1.098876	265	1.107277	265	1.15475	265	-0.1374735	265	-0.1298927	265	-0.1804387	265	-0.1463063	265	-0.1533722	265	-0.1674204	265	-0.1305925	265	-0.1221076	265	-0.1265368
265.2	1.405203	265.2	1.286202	265.2	1.243153	265.2	1.220066	265.2	1.095142	265.2	1.107871	265.2	1.152071	265.2	-0.1330958	265.2	-0.1268678	265.2	-0.1848341	265.2	-0.1425841	265.2	-0.1484678	265.2	-0.1654163	265.2	-0.1231143	265.2	-0.1218368	265.2	-0.1250756
265.4	1.40493	265.4	1.280532	265.4	1.240107	265.4	1.219745	265.4	1.098683	265.4	1.106632	265.4	1.148522	265.4	-0.1363571	265.4	-0.1276707	265.4	-0.1871532	265.4	-0.1416582	265.4	-0.1528584	265.4	-0.1622648	265.4	-0.1277907	265.4	-0.1187281	265.4	-0.123853
265.6	1.407424	265.6	1.291054	265.6	1.249381	265.6	1.220963	265.6	1.09764	265.6	1.10451	265.6	1.152109	265.6	-0.1342914	265.6	-0.1274513	265.6	-0.1885901	265.6	-0.1459333	265.6	-0.1506798	265.6	-0.1657124	265.6	-0.1327525	265.6	-0.1249754	265.6	-0.1268294
265.8	1.40847	265.8	1.28456	265.8	1.240562	265.8	1.214896	265.8	1.09716	265.8	1.104698	265.8	1.148779	265.8	-0.1299661	265.8	-0.1267217	265.8	-0.1881686	265.8	-0.1430657	265.8	-0.1537555	265.8	-0.1655194	265.8	-0.1289249	265.8	-0.1235801	265.8	-0.1232425
266	1.403632	266	1.289122	266	1.242578	266	1.220354	266	1.102406	266	1.104367	266	1.149403	266	-0.132487	266	-0.1277023	266	-0.1828253	266	-0.1421464	266	-0.1485158	266	-0.1659951	266	-0.1272584	266	-0.1239875	266	-0.1253739
266.2	1.409023	266.2	1.288981	266.2	1.246506	266.2	1.229762	266.2	1.09908	266.2	1.112133	266.2	1.150092	266.2	-0.1350165	266.2	-0.1256786	266.2	-0.1861473	266.2	-0.1429392	266.2	-0.1494141	266.2	-0.1688422	266.2	-0.1239836	266.2	-0.1222352	266.2	-0.1232165
266.4	1.406111	266.4	1.284163	266.4	1.249643	266.4	1.222524	266.4	1.096782	266.4	1.103354	266.4	1.152137	266.4	-0.1337839	266.4	-0.128977	266.4	-0.1875879	266.4	-0.1419229	266.4	-0.1471997	266.4	-0.1662439	266.4	-0.1268449	266.4	-0.1239741	266.4	-0.1232918
266.6	1.407046	266.6	1.283212	266.6	1.244409	266.6	1.22006	266.6	1.099228	266.6	1.108465	266.6	1.149644	266.6	-0.1304018	266.6	-0.1199975	266.6	-0.184942	266.6	-0.1425108	266.6	-0.1503256	266.6	-0.1614877	266.6	-0.1282717	266.6	-0.1223779	266.6	-0.1197929
266.8	1.409392	266.8	1.292873	266.8	1.241587	266.8	1.222815	266.8	1.102873	266.8	1.107386	266.8	1.153566	266.8	-0.1318007	266.8	-0.1285042	266.8	-0.1843603	266.8	-0.1444515	266.8	-0.1460663	266.8	-0.1655841	266.8	-0.1290466	266.8	-0.1227738	266.8	-0.1260908
267	1.411473	267	1.289327	267	1.243906	267	1.224246	267	1.103228	267	1.106819	267	1.149739	267	-0.1347293	267	-0.1258047	267	-0.1830494	267	-0.1410596	267	-0.1509424	267	-0.1680026	267	-0.1275604	267	-0.1239222	267	-0.1198063
267.2	1.409298	267.2	1.291035	267.2	1.249474	267.2	1.221159	267.2	1.097295	267.2	1.110064	267.2	1.146123	267.2	-0.1328136	267.2	-0.1215157	267.2	-0.1799375	267.2	-0.1422291	267.2	-0.1510451	267.2	-0.1631021	267.2	-0.1258188	267.2	-0.1215042	267.2	-0.1244791
267.4	1.410548	267.4	1.29132	267.4	1.247783	267.4	1.222167	267.4	1.09913	267.4	1.10806	267.4	1.152063	267.4	-0.1331915	267.4	-0.1200083	267.4	-0.184178	267.4	-0.1370677	267.4	-0.1527368	267.4	-0.1665272	267.4	-0.1287818	267.4	-0.1233186	267.4	-0.1216425
267.6	1.414441	267.6	1.287732	267.6	1.250376	267.6	1.221452	267.6	1.108069	267.6	1.110091	267.6	1.145172	267.6	-0.1286953	267.6	-0.1223238	267.6	-0.1890059	267.6	-0.139623	267.6	-0.14942	267.6	-0.1640549	267.6	-0.1274486	267.6	-0.1210231	267.6	-0.1265786
267.8	1.408146	267.8	1.285091	267.8	1.248014	267.8	1.224076	267.8	1.106956	267.8	1.108017	267.8	1.156238	267.8	-0.1331822	267.8	-0.124602	267.8	-0.1813768	267.8	-0.1423011	267.8	-0.1463443	267.8	-0.1673813	267.8	-0.1259173	267.8	-0.1209112	267.8	-0.1217372
268	1.413167	268	1.291739	268	1.24758	268	1.225976	268	1.103175	268	1.105195	268	1.156151	268	-0.1300514	268	-0.1235373	268	-0.1875842	268	-0.1390984	268	-0.1498102	268	-0.1661241	268	-0.1297459	268	-0.1230479	268	-0.1207779
268.2	1.409486	268.2	1.29235	268.2	1.24869	268.2	1.231174	268.2	1.101077	268.2	1.110682	268.2	1.158386	268.2	-0.1334987	268.2	-0.1242786	268.2	-0.1819839	268.2	-0.1396408	268.2	-0.1478223	268.2	-0.16771	268.2	-0.1307227	268.2	-0.1218981	268.2	-0.1230112
268.4	1.417097	268.4	1.294941	268.4	1.251579	268.4	1.224882	268.4	1.104522	268.4	1.110065	268.4	1.155627	268.4	-0.1322416	268.4	-0.121272	268.4	-0.1823694	268.4	-0.1417809	268.4	-0.1494003	268.4	-0.1632428	268.4	-0.1303759	268.4	-0.1188567	268.4	-0.1221948
268.6	1.41356	268.6	1.296806	268.6	1.250175	268.6	1.226235	268.6	1.102267	268.6	1.10869	268.6	1.155977	268.6	-0.1324332	268.6	-0.1212018	268.6	-0.183531	268.6	-0.1430717	268.6	-0.1524493	268.6	-0.1602945	268.6	-0.1257142	268.6	-0.1272073	268.6	-0.1207171
268.8	1.414159	268.8	1.293939	268.8	1.252972	268.8	1.226791	268.8	1.101609	268.8	1.114749	268.8	1.155238	268.8	-0.1334838	268.8	-0.1268466	268.8	-0.1827879	268.8	-0.1423729	268.8	-0.1485541	268.8	-0.1638847	268.8	-0.1270916	268.8	-0.1206625	268.8	-0.123024
269	1.416954	269	1.296046	269	1.251573	269	1.228787	269	1.103957	269	1.110763	269	1.154344	269	-0.1304549	269	-0.1208041	269	-0.1844236	269	-0.1411016	269	-0.1488386	269	-0.160588	269	-0.1277767	269	-0.1232519	269	-0.1197864
269.2	1.415758	269.2	1.298801	269.2	1.253123	269.2	1.221842	269.2	1.106418	269.2	1.116225	269.2	1.153104	269.2	-0.1330108	269.2	-0.1241941	269.2	-0.1820251	269.2	-0.136978	269.2	-0.149184	269.2	-0.1658305	269.2	-0.130371	269.2	-0.123623	269.2	-0.1223013
269.4	1.41568	269.4	1.298295	269.4	1.24968	269.4	1.229735	269.4	1.103826	269.4	1.110893	269.4	1.160399	269.4	-0.1275253	269.4	-0.1183042	269.4	-0.1877912	269.4	-0.1410238	269.4	-0.1490277	269.4	-0.1673377	269.4	-0.125556	269.4	-0.1233929	269.4	-0.121662
269.6	1.416988	269.6	1.298817	269.6	1.252272	269.6	1.23017	269.6	1.103888	269.6	1.11149	269.6	1.15822	269.6	-0.1276201	269.6	-0.120449	269.6	-0.186379	269.6	-0.1369007	269.6	-0.1498026	269.6	-0.1649259	269.6	-0.1239765	269.6	-0.1180757	269.6	-0.1213573
269.8	1.414912	269.8	1.297136	269.8	1.251377	269.8	1.227491	269.8	1.106547	269.8	1.11252	269.8	1.151781	269.8	-0.1295414	269.8	-0.1272563	269.8	-0.1799922	269.8	-0.1416489	269.8	-0.1511536	269.8	-0.1621553	269.8	-0.1258795	269.8	-0.1211586	269.8	-0.1259354
270	1.416246	270	1.296815	270	1.253135	270	1.231496	270	1.103737	270	1.112732	270	1.151257	270	-0.1321291	270	-0.1252744	270	-0.181811	270	-0.1395911	270	-0.1522443	270	-0.1670398	270	-0.124755	270	-0.121598	270	-0.1235998
270.2	1.414053	270.2	1.294789	270.2	1.253423	270.2	1.229229	270.2	1.105992	270.2	1.109098	270.2	1.152256	270.2	-0.1314505	270.2	-0.1221982	270.2	-0.1821625	270.2	-0.1419597	270.2	-0.1443132	270.2	-0.1643239	270.2	-0.1273137	270.2	-0.1253165	270.2	-0.1196504
270.4	1.421049	270.4	1.299507	270.4	1.252645	270.4	1.232816	270.4	1.108356	270.4	1.111855	270.4	1.157804	270.4	-0.1283735	270.4	-0.1226543	270.4	-0.1851084	270.4	-0.1369359	270.4	-0.1484818	270.4	-0.1628362	270.4	-0.1207534	270.4	-0.1226666	270.4	-0.1171358
270.6	1.419771	270.6	1.299424	270.6	1.251864	270.6	1.229732	270.6	1.105743	270.6	1.114003	270.6	1.152055	270.6	-0.1263883	270.6	-0.12509	270.6	-0.1836371	270.6	-0.1409764	270.6	-0.1473258	270.6	-0.1668384	270.6	-0.1219949	270.6	-0.1233187	270.6	-0.1210111
270.8	1.41501	270.8	1.300428	270.8	1.250106	270.8	1.235563	270.8	1.107231	270.8	1.115871	270.8	1.15293	270.8	-0.1307314	270.8	-0.1240005	270.8	-0.1874479	270.8	-0.1416455	270.8	-0.1473372	270.8	-0.1613553	270.8	-0.1243858	270.8	-0.1212718	270.8	-0.119094
271	1.422071	271	1.300239	271	1.262002	271	1.234846	271	1.105185	271	1.116376	271	1.15615	271	-0.1309752	271	-0.1229186	271	-0.1847445	271	-0.1404909	271	-0.1515565	271	-0.160356	271	-0.1271271	271	-0.1215464	271	-0.1255139
271.2	1.420505	271.2	1.295391	271.2	1.255094	271.2	1.233771	271.2	1.10826	271.2	1.11346	271.2	1.158773	271.2	-0.1275393	271.2	-0.122241	271.2	-0.1846508	271.2	-0.1427266	271.2	-0.1505154	271.2	-0.1615731	271.2	-0.1241831	271.2	-0.1204249	271.2	-0.1225641
271.4	1.421877	271.4	1.30259	271.4	1.256088	271.4	1.229297	271.4	1.10894	271.4	1.11485	271.4	1.159576	271.4	-0.1286904	271.4	-0.1254776	271.4	-0.1807843	271.4	-0.1406844	271.4	-0.1466003	271.4	-0.1638414	271.4	-0.1278795	271.4	-0.1225272	271.4	-0.1200908
271.6	1.419434	271.6	1.303295	271.6	1.260225	271.6	1.23456	271.6	1.111041	271.6	1.114066	271.6	1.162337	271.6	-0.1257103	271.6	-0.1231863	271.6	-0.1833363	271.6	-0.1362099	271.6	-0.1500843	271.6	-0.1620085	271.6	-0.1278152	271.6	-0.1194535	271.6	-0.1180979
271.8	1.417857	271.8	1.301954	271.8	1.258111	271.8	1.236833	271.8	1.107628	271.8	1.114925	271.8	1.161383	271.8	-0.1284025	271.8	-0.1268783	271.8	-0.1866565	271.8	-0.1462343	271.8	-0.1477897	271.8	-0.1674435	271.8	-0.1247527	271.8	-0.1215182	271.8	-0.1201439
272	1.422342	272	1.301294	272	1.255852	272	1.236986	272	1.107796	272	1.116143	272	1.159852	272	-0.1292693	272	-0.1192819	272	-0.1807871	272	-0.1395144	272	-0.1486627	272	-0.1623095	272	-0.124949	272	-0.1180243	272	-0.11768
272.2	1.422449	272.2	1.302088	272.2	1.256925	272.2	1.235195	272.2	1.107357	272.2	1.110778	272.2	1.154087	272.2	-0.1319211	272.2	-0.1228222	272.2	-0.1799017	272.2	-0.1426223	272.2	-0.14909	272.2	-0.1656166	272.2	-0.1272805	272.2	-0.116787	272.2	-0.1162363
272.4	1.422968	272.4	1.306996	272.4	1.260726	272.4	1.235408	272.4	1.110279	272.4	1.116222	272.4	1.152132	272.4	-0.1288767	272.4	-0.126889	272.4	-0.1782591	272.4	-0.1398372	272.4	-0.1462558	272.4	-0.1627375	272.4	-0.1228069	272.4	-0.1206918	272.4	-0.1178713
272.6	1.422564	272.6	1.304259	272.6	1.259366	272.6	1.234101	272.6	1.108237	272.6	1.116854	272.6	1.160796	272.6	-0.1304924	272.6	-0.1236566	272.6	-0.1844376	272.6	-0.144012	272.6	-0.1496839	272.6	-0.1547957	272.6	-0.1221547	272.6	-0.1187241	272.6	-0.1169907
272.8	1.421756	272.8	1.304143	272.8	1.260056	272.8	1.235101	272.8	1.11485	272.8	1.118183	272.8	1.156757	272.8	-0.1261471	272.8	-0.1233848	272.8	-0.1834788	272.8	-0.1357194	272.8	-0.1500709	272.8	-0.1674682	272.8	-0.1236221	272.8	-0.1179206	272.8	-0.11924
273	1.423635	273	1.305785	273	1.259515	273	1.238925	273	1.109923	273	1.121384	273	1.157911	273	-0.1314966	273	-0.1202573	273	-0.1829901	273	-0.1344498	273	-0.1493558	273	-0.1669964	273	-0.1289079	273	-0.1234455	273	-0.1197527
273.2	1.42659	273.2	1.308846	273.2	1.261391	273.2	1.235794	273.2	1.110688	273.2	1.119372	273.2	1.161412	273.2	-0.1342596	273.2	-0.1214966	273.2	-0.1815974	273.2	-0.1388367	273.2	-0.15081	273.2	-0.1642548	273.2	-0.1260276	273.2	-0.1182701	273.2	-0.1256142
273.4	1.427067	273.4	1.30599	273.4	1.261219	273.4	1.238186	273.4	1.114936	273.4	1.118853	273.4	1.15986	273.4	-0.1294489	273.4	-0.1207436	273.4	-0.185617	273.4	-0.1370367	273.4	-0.1495981	273.4	-0.1609723	273.4	-0.1271232	273.4	-0.1185598	273.4	-0.1202329
273.6	1.423632	273.6	1.308029	273.6	1.261519	273.6	1.238569	273.6	1.110775	273.6	1.121741	273.6	1.157732	273.6	-0.1312105	273.6	-0.1194297	273.6	-0.1830612	273.6	-0.1415764	273.6	-0.1478016	273.6	-0.1629859	273.6	-0.122949	273.6	-0.1188002	273.6	-0.1216036
273.8	1.425515	273.8	1.307391	273.8	1.260651	273.8	1.240248	273.8	1.115694	273.8	1.11853	273.8	1.161686	273.8	-0.1220929	273.8	-0.1217337	273.8	-0.1832692	273.8	-0.1342035	273.8	-0.1483605	273.8	-0.1637996	273.8	-0.1211923	273.8	-0.1199101	273.8	-0.1223804
274	1.426293	274	1.307898	274	1.262229	274	1.236669	274	1.110044	274	1.122065	274	1.156678	274	-0.127073	274	-0.1242783	274	-0.1801384	274	-0.1386598	274	-0.147797	274	-0.1659023	274	-0.1227896	274	-0.121359	274	-0.1205673
274.2	1.427626	274.2	1.309876	274.2	1.263417	274.2	1.242976	274.2	1.11129	274.2	1.11756	274.2	1.157645	274.2	-0.1269213	274.2	-0.12329	274.2	-0.179865	274.2	-0.1391004	274.2	-0.1474174	274.2	-0.1584197	274.2	-0.1219008	274.2	-0.1187374	274.2	-0.1188923
274.4	1.422678	274.4	1.305449	274.4	1.262405	274.4	1.235271	274.4	1.115487	274.4	1.113337	274.4	1.160332	274.4	-0.1257579	274.4	-0.1209615	274.4	-0.1812963	274.4	-0.1416418	274.4	-0.1444757	274.4	-0.1630256	274.4	-0.1215035	274.4	-0.1235204	274.4	-0.1195886
274.6	1.426313	274.6	1.310741	274.6	1.264035	274.6	1.240153	274.6	1.115852	274.6	1.116106	274.6	1.159817	274.6	-0.1247811	274.6	-0.1210274	274.6	-0.1787417	274.6	-0.1393891	274.6	-0.1472674	274.6	-0.1615506	274.6	-0.1268494	274.6	-0.1178306	274.6	-0.115261
274.8	1.425426	274.8	1.310433	274.8	1.260257	274.8	1.239491	274.8	1.113148	274.8	1.120671	274.8	1.159785	274.8	-0.1273684	274.8	-0.1229074	274.8	-0.1777067	274.8	-0.1401154	274.8	-0.1431345	274.8	-0.1594296	274.8	-0.1214657	274.8	-0.1213219	274.8	-0.1176941
275	1.427385	275	1.309103	275	1.265112	275	1.239197	275	1.112604	275	1.120176	275	1.158311	275	-0.124202	275	-0.1169223	275	-0.1797731	275	-0.136885	275	-0.1463172	275	-0.1627362	275	-0.1232567	275	-0.1186459	275	-0.1181455
275.2	1.426065	275.2	1.309519	275.2	1.264471	275.2	1.245015	275.2	1.113919	275.2	1.118657	275.2	1.15966	275.2	-0.1284627	275.2	-0.1211002	275.2	-0.1821857	275.2	-0.1374729	275.2	-0.142016	275.2	-0.1630742	275.2	-0.1215617	275.2	-0.1197106	275.2	-0.1175461
275.4	1.428873	275.4	1.313811	275.4	1.26611	275.4	1.240027	275.4	1.115087	275.4	1.1174	275.4	1.163234	275.4	-0.125663	275.4	-0.1214059	275.4	-0.1818811	275.4	-0.1390118	275.4	-0.1428157	275.4	-0.1627735	275.4	-0.1202126	275.4	-0.1188422	275.4	-0.1178883
275.6	1.427616	275.6	1.312221	275.6	1.267731	275.6	1.242573	275.6	1.114695	275.6	1.121136	275.6	1.16293	275.6	-0.1217036	275.6	-0.1216762	275.6	-0.1800536	275.6	-0.137557	275.6	-0.1480751	275.6	-0.1580608	275.6	-0.1240702	275.6	-0.1159257	275.6	-0.1177097
275.8	1.430577	275.8	1.309805	275.8	1.267055	275.8	1.24313	275.8	1.112851	275.8	1.121932	275.8	1.163197	275.8	-0.1224562	275.8	-0.1206641	275.8	-0.1801317	275.8	-0.1416586	275.8	-0.1478362	275.8	-0.1626136	275.8	-0.1214953	275.8	-0.1166436	275.8	-0.1166975
276	1.429422	276	1.313449	276	1.264363	276	1.240948	276	1.11475	276	1.123477	276	1.163319	276	-0.1269397	276	-0.1221834	276	-0.1802959	276	-0.1406365	276	-0.1445433	276	-0.1586637	276	-0.1188626	276	-0.1144196	276	-0.1129262
276.2	1.429945	276.2	1.311283	276.2	1.266333	276.2	1.241715	276.2	1.111698	276.2	1.121188	276.2	1.162102	276.2	-0.1274423	276.2	-0.119579	276.2	-0.1837683	276.2	-0.1404721	276.2	-0.1455623	276.2	-0.1644729	276.2	-0.1236025	276.2	-0.1159805	276.2	-0.1183598
276.4	1.434494	276.4	1.310855	276.4	1.267661	276.4	1.242808	276.4	1.116077	276.4	1.120157	276.4	1.160187	276.4	-0.1252065	276.4	-0.1176443	276.4	-0.1762224	276.4	-0.1367085	276.4	-0.1443823	276.4	-0.1588456	276.4	-0.1207321	276.4	-0.1163267	276.4	-0.1192616
276.6	1.434424	276.6	1.310469	276.6	1.266203	276.6	1.245176	276.6	1.117449	276.6	1.121862	276.6	1.160098	276.6	-0.1244509	276.6	-0.1227809	276.6	-0.1819254	276.6	-0.1378855	276.6	-0.1449245	276.6	-0.1578079	276.6	-0.1223084	276.6	-0.1148641	276.6	-0.1184941
276.8	1.430124	276.8	1.316274	276.8	1.268167	276.8	1.246128	276.8	1.119258	276.8	1.122137	276.8	1.162332	276.8	-0.1274052	276.8	-0.1255175	276.8	-0.1851155	276.8	-0.1394764	276.8	-0.1457746	276.8	-0.1577607	276.8	-0.1220248	276.8	-0.1159306	276.8	-0.1189825
277	1.430552	277	1.312575	277	1.272439	277	1.246887	277	1.115219	277	1.121227	277	1.160186	277	-0.1211074	277	-0.1188475	277	-0.1809374	277	-0.1368898	277	-0.1421928	277	-0.1587749	277	-0.1240083	277	-0.1201247	277	-0.121974
277.2	1.431859	277.2	1.317972	277.2	1.271518	277.2	1.244717	277.2	1.122714	277.2	1.124524	277.2	1.163272	277.2	-0.1269101	277.2	-0.1215532	277.2	-0.1807944	277.2	-0.1381809	277.2	-0.1437248	277.2	-0.1576394	277.2	-0.1195578	277.2	-0.1182711	277.2	-0.1193241
277.4	1.435945	277.4	1.318086	277.4	1.270527	277.4	1.244265	277.4	1.120067	277.4	1.125392	277.4	1.159659	277.4	-0.1237367	277.4	-0.1200096	277.4	-0.1804367	277.4	-0.1391555	277.4	-0.1453683	277.4	-0.1570205	277.4	-0.1211377	277.4	-0.121864	277.4	-0.1172544
277.6	1.430903	277.6	1.313243	277.6	1.272851	277.6	1.243931	277.6	1.118287	277.6	1.118714	277.6	1.161985	277.6	-0.1230307	277.6	-0.1221585	277.6	-0.1841849	277.6	-0.1379533	277.6	-0.1410846	277.6	-0.1592866	277.6	-0.1180682	277.6	-0.1151401	277.6	-0.1212774
277.8	1.430855	277.8	1.318552	277.8	1.269308	277.8	1.244938	277.8	1.115841	277.8	1.1216	277.8	1.164265	277.8	-0.1261346	277.8	-0.1169324	277.8	-0.1795789	277.8	-0.1422278	277.8	-0.1457039	277.8	-0.1616294	277.8	-0.120529	277.8	-0.1186276	277.8	-0.1211049
278	1.438416	278	1.312649	278	1.271168	278	1.247622	278	1.114314	278	1.120501	278	1.160148	278	-0.1284905	278	-0.1167133	278	-0.17871	278	-0.1353169	278	-0.1423512	278	-0.161211	278	-0.123573	278	-0.1169662	278	-0.1183853
278.2	1.434491	278.2	1.314112	278.2	1.271657	278.2	1.24972	278.2	1.123069	278.2	1.122022	278.2	1.162166	278.2	-0.1237892	278.2	-0.1141196	278.2	-0.1777036	278.2	-0.1369693	278.2	-0.14151	278.2	-0.1605119	278.2	-0.1207489	278.2	-0.1193795	278.2	-0.1191999
278.4	1.436908	278.4	1.315756	278.4	1.271889	278.4	1.249043	278.4	1.120336	278.4	1.123982	278.4	1.163751	278.4	-0.1231031	278.4	-0.1184529	278.4	-0.1792246	278.4	-0.1386874	278.4	-0.1425126	278.4	-0.1584011	278.4	-0.1215058	278.4	-0.1167533	278.4	-0.1180143
278.6	1.435983	278.6	1.313956	278.6	1.27285	278.6	1.249388	278.6	1.119784	278.6	1.126211	278.6	1.164534	278.6	-0.1250008	278.6	-0.1176491	278.6	-0.1802848	278.6	-0.1359149	278.6	-0.1490486	278.6	-0.1564873	278.6	-0.1223232	278.6	-0.1150799	278.6	-0.1186317
278.8	1.437913	278.8	1.315633	278.8	1.271516	278.8	1.247702	278.8	1.120415	278.8	1.12513	278.8	1.162513	278.8	-0.1254557	278.8	-0.1184697	278.8	-0.1770251	278.8	-0.1363422	278.8	-0.1482523	278.8	-0.1604248	278.8	-0.1202409	278.8	-0.1182737	278.8	-0.1168453
279	1.437564	279	1.318617	279	1.270983	279	1.245951	279	1.12018	279	1.122491	279	1.164698	279	-0.1276559	279	-0.1139837	279	-0.1806925	279	-0.1367456	279	-0.1417465	279	-0.1557757	279	-0.1174391	279	-0.1180693	279	-0.1181173
279.2	1.436401	279.2	1.316786	279.2	1.275643	279.2	1.247787	279.2	1.118996	279.2	1.127097	279.2	1.16533	279.2	-0.1261378	279.2	-0.1167826	279.2	-0.179415	279.2	-0.1364762	279.2	-0.1438584	279.2	-0.1633928	279.2	-0.1180276	279.2	-0.11876	279.2	-0.1177627
279.4	1.437871	279.4	1.317686	279.4	1.273496	279.4	1.254827	279.4	1.12953	279.4	1.130296	279.4	1.167142	279.4	-0.1216331	279.4	-0.1203641	279.4	-0.1791287	279.4	-0.1350922	279.4	-0.145883	279.4	-0.1584447	279.4	-0.1243825	279.4	-0.1146298	279.4	-0.1162714
279.6	1.438335	279.6	1.321572	279.6	1.27412	279.6	1.253053	279.6	1.116949	279.6	1.124924	279.6	1.166281	279.6	-0.1254296	279.6	-0.1205405	279.6	-0.1759626	279.6	-0.1368548	279.6	-0.1413696	279.6	-0.1614651	279.6	-0.1189862	279.6	-0.1141073	279.6	-0.1173784
279.8	1.435793	279.8	1.316754	279.8	1.273114	279.8	1.253275	279.8	1.120532	279.8	1.128792	279.8	1.167743	279.8	-0.1238127	279.8	-0.1193532	279.8	-0.1824259	279.8	-0.1391766	279.8	-0.1434016	279.8	-0.1597629	279.8	-0.1225822	279.8	-0.1158177	279.8	-0.1175394
280	1.438012	280	1.317925	280	1.277771	280	1.248212	280	1.124087	280	1.124852	280	1.164361	280	-0.1278899	280	-0.1192775	280	-0.1786494	280	-0.1328005	280	-0.1452596	280	-0.1572964	280	-0.1236755	280	-0.1196209	280	-0.116749
280.2	1.438282	280.2	1.320907	280.2	1.268999	280.2	1.249882	280.2	1.120191	280.2	1.129597	280.2	1.165686	280.2	-0.1254465	280.2	-0.117499	280.2	-0.1774036	280.2	-0.1338921	280.2	-0.1421824	280.2	-0.1584428	280.2	-0.1224409	280.2	-0.114788	280.2	-0.1174223
280.4	1.438336	280.4	1.317156	280.4	1.276111	280.4	1.255478	280.4	1.121549	280.4	1.125864	280.4	1.169003	280.4	-0.119786	280.4	-0.1169436	280.4	-0.1805536	280.4	-0.1359978	280.4	-0.1364454	280.4	-0.1589243	280.4	-0.1241465	280.4	-0.1182463	280.4	-0.1210511
280.6	1.435191	280.6	1.318933	280.6	1.276598	280.6	1.252014	280.6	1.121363	280.6	1.126871	280.6	1.163841	280.6	-0.1224416	280.6	-0.1200395	280.6	-0.177537	280.6	-0.1350578	280.6	-0.1418664	280.6	-0.1625483	280.6	-0.1201511	280.6	-0.1164647	280.6	-0.1146631
280.8	1.438962	280.8	1.320083	280.8	1.276624	280.8	1.249638	280.8	1.124955	280.8	1.127105	280.8	1.167614	280.8	-0.1236922	280.8	-0.1180007	280.8	-0.1774432	280.8	-0.1368945	280.8	-0.1430322	280.8	-0.1568285	280.8	-0.120562	280.8	-0.11618	280.8	-0.1140435
281	1.443692	281	1.31998	281	1.278118	281	1.252561	281	1.125151	281	1.123757	281	1.169853	281	-0.1217064	281	-0.1175062	281	-0.1768414	281	-0.1375787	281	-0.1408276	281	-0.1606577	281	-0.118748	281	-0.115895	281	-0.1120404
281.2	1.443152	281.2	1.327026	281.2	1.277372	281.2	1.25137	281.2	1.120189	281.2	1.12572	281.2	1.160942	281.2	-0.1218936	281.2	-0.1183548	281.2	-0.1818935	281.2	-0.1330734	281.2	-0.1406256	281.2	-0.1553602	281.2	-0.1220502	281.2	-0.1147264	281.2	-0.1183264
281.4	1.439793	281.4	1.320433	281.4	1.279124	281.4	1.252926	281.4	1.125833	281.4	1.12603	281.4	1.166136	281.4	-0.1233406	281.4	-0.1199877	281.4	-0.1787017	281.4	-0.1356029	281.4	-0.1411206	281.4	-0.1581127	281.4	-0.1193336	281.4	-0.1180944	281.4	-0.1159496
281.6	1.44389	281.6	1.324577	281.6	1.278446	281.6	1.252778	281.6	1.123805	281.6	1.129747	281.6	1.167179	281.6	-0.1228351	281.6	-0.114336	281.6	-0.1759733	281.6	-0.1353248	281.6	-0.1394721	281.6	-0.156516	281.6	-0.1144233	281.6	-0.1151994	281.6	-0.1173209
281.8	1.445642	281.8	1.32128	281.8	1.280863	281.8	1.25539	281.8	1.123996	281.8	1.126717	281.8	1.164976	281.8	-0.123149	281.8	-0.1190318	281.8	-0.1783537	281.8	-0.1316086	281.8	-0.1426373	281.8	-0.1583876	281.8	-0.1215274	281.8	-0.119585	281.8	-0.1159563
282	1.447412	282	1.321915	282	1.27407	282	1.253679	282	1.123736	282	1.128878	282	1.165462	282	-0.1206593	282	-0.1118621	282	-0.1772151	282	-0.1300274	282	-0.1413729	282	-0.1634397	282	-0.1189928	282	-0.1157714	282	-0.1190591
282.2	1.441672	282.2	1.325729	282.2	1.280447	282.2	1.255653	282.2	1.124549	282.2	1.125777	282.2	1.167951	282.2	-0.1191766	282.2	-0.1153714	282.2	-0.178904	282.2	-0.1344138	282.2	-0.1454398	282.2	-0.1570928	282.2	-0.1221141	282.2	-0.1156304	282.2	-0.1138853
282.4	1.439702	282.4	1.326821	282.4	1.283739	282.4	1.257446	282.4	1.127504	282.4	1.126562	282.4	1.16638	282.4	-0.1195776	282.4	-0.1218771	282.4	-0.1778312	282.4	-0.1306463	282.4	-0.1421293	282.4	-0.1605882	282.4	-0.1195133	282.4	-0.1140631	282.4	-0.1136669
282.6	1.443494	282.6	1.332	282.6	1.279635	282.6	1.253517	282.6	1.126008	282.6	1.132369	282.6	1.167861	282.6	-0.117751	282.6	-0.114763	282.6	-0.1735592	282.6	-0.1382395	282.6	-0.1400958	282.6	-0.1547406	282.6	-0.1212548	282.6	-0.1148784	282.6	-0.1134806
282.8	1.448062	282.8	1.327914	282.8	1.280289	282.8	1.251511	282.8	1.126721	282.8	1.127355	282.8	1.162891	282.8	-0.1232896	282.8	-0.1161222	282.8	-0.1761918	282.8	-0.134107	282.8	-0.135461	282.8	-0.1582409	282.8	-0.1193816	282.8	-0.1137866	282.8	-0.1147501
283	1.449074	283	1.324508	283	1.284806	283	1.26115	283	1.121925	283	1.130383	283	1.172042	283	-0.1212706	283	-0.1160087	283	-0.1776923	283	-0.1348576	283	-0.1458249	283	-0.1576761	283	-0.1196542	283	-0.1121672	283	-0.1131783
283.2	1.4442	283.2	1.329031	283.2	1.279307	283.2	1.253938	283.2	1.128137	283.2	1.130104	283.2	1.170831	283.2	-0.1192546	283.2	-0.1150113	283.2	-0.1748792	283.2	-0.1353534	283.2	-0.139826	283.2	-0.1559171	283.2	-0.1201285	283.2	-0.1193513	283.2	-0.1173072
283.4	1.44337	283.4	1.326543	283.4	1.282368	283.4	1.254438	283.4	1.126079	283.4	1.1289	283.4	1.169413	283.4	-0.1260238	283.4	-0.1183954	283.4	-0.179458	283.4	-0.1367512	283.4	-0.1399846	283.4	-0.1575135	283.4	-0.1159624	283.4	-0.118892	283.4	-0.1184527
283.6	1.444614	283.6	1.32596	283.6	1.28225	283.6	1.25845	283.6	1.121377	283.6	1.128578	283.6	1.171564	283.6	-0.1215124	283.6	-0.1136054	283.6	-0.1730438	283.6	-0.1345665	283.6	-0.1380354	283.6	-0.1546268	283.6	-0.1177666	283.6	-0.1152446	283.6	-0.1145001
283.8	1.446793	283.8	1.328813	283.8	1.286185	283.8	1.257285	283.8	1.12483	283.8	1.133591	283.8	1.170807	283.8	-0.123692	283.8	-0.1186524	283.8	-0.1770363	283.8	-0.1403609	283.8	-0.138445	283.8	-0.1547782	283.8	-0.1142837	283.8	-0.117412	283.8	-0.1133414
284	1.448326	284	1.323385	284	1.285975	284	1.261827	284	1.127279	284	1.132007	284	1.172718	284	-0.1219565	284	-0.1171361	284	-0.1778113	284	-0.1365016	284	-0.1383573	284	-0.1530099	284	-0.1222845	284	-0.1153752	284	-0.1176734
284.2	1.442269	284.2	1.328493	284.2	1.287838	284.2	1.256034	284.2	1.130966	284.2	1.131128	284.2	1.169052	284.2	-0.1199266	284.2	-0.1146205	284.2	-0.1779975	284.2	-0.1310279	284.2	-0.1421642	284.2	-0.1555698	284.2	-0.1202112	284.2	-0.1150609	284.2	-0.1131741
284.4	1.444488	284.4	1.325056	284.4	1.283551	284.4	1.261005	284.4	1.130794	284.4	1.133801	284.4	1.172428	284.4	-0.1204435	284.4	-0.1229241	284.4	-0.1773307	284.4	-0.1323284	284.4	-0.1384925	284.4	-0.1562659	284.4	-0.1197067	284.4	-0.1138927	284.4	-0.1141571
284.6	1.450625	284.6	1.330681	284.6	1.284743	284.6	1.260149	284.6	1.133985	284.6	1.131399	284.6	1.168172	284.6	-0.1213116	284.6	-0.1191687	284.6	-0.1745155	284.6	-0.1307676	284.6	-0.1372581	284.6	-0.1593263	284.6	-0.1203102	284.6	-0.1150262	284.6	-0.1129779
284.8	1.448714	284.8	1.328947	284.8	1.282401	284.8	1.260259	284.8	1.130372	284.8	1.127257	284.8	1.167812	284.8	-0.1225649	284.8	-0.1128931	284.8	-0.1760246	284.8	-0.1337768	284.8	-0.1378818	284.8	-0.1556441	284.8	-0.1193523	284.8	-0.1147201	284.8	-0.1160477
285	1.447053	285	1.330834	285	1.285278	285	1.260429	285	1.134541	285	1.128931	285	1.171095	285	-0.122279	285	-0.1198441	285	-0.1734368	285	-0.1337842	285	-0.1368436	285	-0.1544513	285	-0.1146686	285	-0.1138842	285	-0.1139754
285.2	1.448605	285.2	1.335339	285.2	1.286659	285.2	1.260478	285.2	1.127679	285.2	1.133999	285.2	1.171305	285.2	-0.1190773	285.2	-0.1136518	285.2	-0.1798412	285.2	-0.1352686	285.2	-0.1418009	285.2	-0.1557931	285.2	-0.1182811	285.2	-0.1171504	285.2	-0.1125578
285.4	1.451184	285.4	1.332389	285.4	1.284026	285.4	1.261393	285.4	1.133982	285.4	1.127401	285.4	1.171443	285.4	-0.1181448	285.4	-0.1156819	285.4	-0.1733237	285.4	-0.1332736	285.4	-0.1419629	285.4	-0.1613284	285.4	-0.1163857	285.4	-0.1115825	285.4	-0.1155549
285.6	1.451132	285.6	1.330616	285.6	1.283026	285.6	1.261851	285.6	1.130193	285.6	1.133562	285.6	1.172941	285.6	-0.1174353	285.6	-0.1163642	285.6	-0.176656	285.6	-0.1330632	285.6	-0.135264	285.6	-0.161359	285.6	-0.1209841	285.6	-0.1109821	285.6	-0.1166445
285.8	1.451257	285.8	1.333843	285.8	1.290837	285.8	1.263891	285.8	1.136627	285.8	1.13231	285.8	1.17132	285.8	-0.1185148	285.8	-0.1206347	285.8	-0.1791073	285.8	-0.1377176	285.8	-0.1382826	285.8	-0.1558091	285.8	-0.1178656	285.8	-0.1138282	285.8	-0.1165574
286	1.449907	286	1.330032	286	1.288197	286	1.259641	286	1.129321	286	1.131283	286	1.170269	286	-0.1211123	286	-0.1152536	286	-0.1789375	286	-0.1348282	286	-0.1402155	286	-0.1593179	286	-0.1136651	286	-0.1156169	286	-0.1116082
286.2	1.449488	286.2	1.330766	286.2	1.284818	286.2	1.259974	286.2	1.133478	286.2	1.13168	286.2	1.166559	286.2	-0.1203866	286.2	-0.1137137	286.2	-0.1698307	286.2	-0.1355315	286.2	-0.1404421	286.2	-0.1598512	286.2	-0.1185874	286.2	-0.1111675	286.2	-0.1116689
286.4	1.455041	286.4	1.332118	286.4	1.291011	286.4	1.265844	286.4	1.136145	286.4	1.132801	286.4	1.168477	286.4	-0.1191125	286.4	-0.1134784	286.4	-0.1733984	286.4	-0.135624	286.4	-0.14205	286.4	-0.1551583	286.4	-0.1161277	286.4	-0.113413	286.4	-0.1124332
286.6	1.45256	286.6	1.33082	286.6	1.2875	286.6	1.266017	286.6	1.134221	286.6	1.133608	286.6	1.172646	286.6	-0.1186232	286.6	-0.1144744	286.6	-0.1807674	286.6	-0.1307385	286.6	-0.1397121	286.6	-0.1574001	286.6	-0.1199162	286.6	-0.111601	286.6	-0.1185365
286.8	1.451438	286.8	1.333769	286.8	1.286837	286.8	1.262867	286.8	1.135705	286.8	1.134722	286.8	1.175649	286.8	-0.1228965	286.8	-0.1166161	286.8	-0.1747054	286.8	-0.1325593	286.8	-0.1371944	286.8	-0.1573574	286.8	-0.1149772	286.8	-0.114392	286.8	-0.1143585
287	1.450839	287	1.331957	287	1.290841	287	1.267458	287	1.136125	287	1.136578	287	1.175367	287	-0.1197365	287	-0.1165765	287	-0.1721253	287	-0.1354136	287	-0.139678	287	-0.155908	287	-0.1169361	287	-0.1130472	287	-0.1143954
287.2	1.45178	287.2	1.32856	287.2	1.292934	287.2	1.259799	287.2	1.12887	287.2	1.137744	287.2	1.175087	287.2	-0.1175808	287.2	-0.114936	287.2	-0.1774335	287.2	-0.1329605	287.2	-0.1399187	287.2	-0.1543512	287.2	-0.1186708	287.2	-0.1133817	287.2	-0.118266
287.4	1.453174	287.4	1.335861	287.4	1.291451	287.4	1.262501	287.4	1.131005	287.4	1.136998	287.4	1.1758	287.4	-0.1207382	287.4	-0.1164062	287.4	-0.1738725	287.4	-0.1294976	287.4	-0.1397803	287.4	-0.1597528	287.4	-0.1152325	287.4	-0.1098764	287.4	-0.1159754
287.6	1.450719	287.6	1.331151	287.6	1.293533	287.6	1.269537	287.6	1.135409	287.6	1.130149	287.6	1.176234	287.6	-0.1193154	287.6	-0.1136708	287.6	-0.1756715	287.6	-0.1293778	287.6	-0.1388921	287.6	-0.158317	287.6	-0.1186317	287.6	-0.1079112	287.6	-0.1136686
287.8	1.448618	287.8	1.339414	287.8	1.291872	287.8	1.26273	287.8	1.137264	287.8	1.138266	287.8	1.175095	287.8	-0.1197554	287.8	-0.1151478	287.8	-0.1779257	287.8	-0.1349956	287.8	-0.1353838	287.8	-0.1607305	287.8	-0.1114748	287.8	-0.1119183	287.8	-0.1132808
288	1.457532	288	1.34131	288	1.290653	288	1.271321	288	1.136262	288	1.133615	288	1.175194	288	-0.1098771	288	-0.1145752	288	-0.1769828	288	-0.1357138	288	-0.1420553	288	-0.151997	288	-0.1179941	288	-0.1149333	288	-0.1168857
288.2	1.458887	288.2	1.335718	288.2	1.2961	288.2	1.262671	288.2	1.131425	288.2	1.137965	288.2	1.173499	288.2	-0.1195281	288.2	-0.1132764	288.2	-0.1760034	288.2	-0.1323611	288.2	-0.1373476	288.2	-0.1546744	288.2	-0.1131297	288.2	-0.1105109	288.2	-0.1153478
288.4	1.457769	288.4	1.336298	288.4	1.293893	288.4	1.266192	288.4	1.133473	288.4	1.134316	288.4	1.17247	288.4	-0.1203119	288.4	-0.1135749	288.4	-0.1844367	288.4	-0.1350262	288.4	-0.13549	288.4	-0.1529083	288.4	-0.117526	288.4	-0.1089999	288.4	-0.1149988
288.6	1.455729	288.6	1.33184	288.6	1.293205	288.6	1.269284	288.6	1.139129	288.6	1.136489	288.6	1.175262	288.6	-0.1197793	288.6	-0.1123131	288.6	-0.1713521	288.6	-0.1309056	288.6	-0.1406847	288.6	-0.1594502	288.6	-0.1161374	288.6	-0.110317	288.6	-0.1163931
288.8	1.45204	288.8	1.342838	288.8	1.293905	288.8	1.268588	288.8	1.136422	288.8	1.13507	288.8	1.17775	288.8	-0.1210154	288.8	-0.1144458	288.8	-0.1743874	288.8	-0.1322792	288.8	-0.1397172	288.8	-0.1534173	288.8	-0.1169176	288.8	-0.1114927	288.8	-0.1150075
289	1.45694	289	1.339418	289	1.290228	289	1.266147	289	1.133107	289	1.136618	289	1.177606	289	-0.1199772	289	-0.1145445	289	-0.1781424	289	-0.1314628	289	-0.1393804	289	-0.1544188	289	-0.1162382	289	-0.1079307	289	-0.1135189
289.2	1.461228	289.2	1.337519	289.2	1.292773	289.2	1.267659	289.2	1.137721	289.2	1.138142	289.2	1.171241	289.2	-0.1167575	289.2	-0.1133962	289.2	-0.1752001	289.2	-0.1288343	289.2	-0.1367758	289.2	-0.1536426	289.2	-0.1164492	289.2	-0.1136659	289.2	-0.1113891
289.4	1.457289	289.4	1.338719	289.4	1.292873	289.4	1.268042	289.4	1.135057	289.4	1.138924	289.4	1.175541	289.4	-0.1234371	289.4	-0.1139555	289.4	-0.1745302	289.4	-0.1326895	289.4	-0.1363426	289.4	-0.1554975	289.4	-0.1143033	289.4	-0.1119469	289.4	-0.1138581
289.6	1.455965	289.6	1.341448	289.6	1.291621	289.6	1.26598	289.6	1.138359	289.6	1.134825	289.6	1.174027	289.6	-0.1158125	289.6	-0.1141125	289.6	-0.1781757	289.6	-0.1371353	289.6	-0.1354281	289.6	-0.1548947	289.6	-0.1153972	289.6	-0.1150727	289.6	-0.113043
289.8	1.456039	289.8	1.339264	289.8	1.292285	289.8	1.267536	289.8	1.131864	289.8	1.135307	289.8	1.171615	289.8	-0.1173586	289.8	-0.1131423	289.8	-0.177329	289.8	-0.1351802	289.8	-0.1368896	289.8	-0.1522297	289.8	-0.1149855	289.8	-0.1140086	289.8	-0.1083908
290	1.458468	290	1.339994	290	1.295877	290	1.270141	290	1.140289	290	1.134585	290	1.178105	290	-0.1188294	290	-0.1165991	290	-0.1760393	290	-0.1322479	290	-0.1398469	290	-0.1570481	290	-0.1168802	290	-0.1137368	290	-0.1102388
290.2	1.456993	290.2	1.338848	290.2	1.300649	290.2	1.273846	290.2	1.144017	290.2	1.136836	290.2	1.177452	290.2	-0.1211069	290.2	-0.111888	290.2	-0.1781138	290.2	-0.1302478	290.2	-0.1343826	290.2	-0.1594995	290.2	-0.1116486	290.2	-0.1159561	290.2	-0.1128755
290.4	1.462274	290.4	1.344156	290.4	1.299855	290.4	1.27083	290.4	1.137758	290.4	1.133038	290.4	1.173051	290.4	-0.120246	290.4	-0.110047	290.4	-0.1783882	290.4	-0.1322824	290.4	-0.1363983	290.4	-0.1566276	290.4	-0.113518	290.4	-0.1114722	290.4	-0.111708
290.6	1.459606	290.6	1.338415	290.6	1.293851	290.6	1.266321	290.6	1.137374	290.6	1.139198	290.6	1.177763	290.6	-0.1188931	290.6	-0.1138988	290.6	-0.1751399	290.6	-0.1307291	290.6	-0.1339763	290.6	-0.1586085	290.6	-0.1186571	290.6	-0.1133476	290.6	-0.114124
290.8	1.458786	290.8	1.345064	290.8	1.292066	290.8	1.268407	290.8	1.139843	290.8	1.139164	290.8	1.175912	290.8	-0.1164186	290.8	-0.1189915	290.8	-0.1722495	290.8	-0.1297989	290.8	-0.13672	290.8	-0.1541641	290.8	-0.115818	290.8	-0.1124686	290.8	-0.111521
291	1.459006	291	1.344046	291	1.299307	291	1.268934	291	1.136388	291	1.140986	291	1.181846	291	-0.1154968	291	-0.1094433	291	-0.1730713	291	-0.1339816	291	-0.1388696	291	-0.1572847	291	-0.1171648	291	-0.1120098	291	-0.1123483
291.2	1.46121	291.2	1.340556	291.2	1.29978	291.2	1.270447	291.2	1.13905	291.2	1.140212	291.2	1.180997	291.2	-0.1152556	291.2	-0.1162417	291.2	-0.1776377	291.2	-0.1310858	291.2	-0.1337817	291.2	-0.1490758	291.2	-0.114226	291.2	-0.110571	291.2	-0.1128846
291.4	1.462038	291.4	1.344787	291.4	1.302184	291.4	1.273605	291.4	1.138626	291.4	1.140782	291.4	1.177613	291.4	-0.1169169	291.4	-0.1164865	291.4	-0.1755273	291.4	-0.1317189	291.4	-0.1437487	291.4	-0.149674	291.4	-0.1172388	291.4	-0.1102474	291.4	-0.1138909
291.6	1.465242	291.6	1.338743	291.6	1.300806	291.6	1.274523	291.6	1.138113	291.6	1.136703	291.6	1.180406	291.6	-0.1172632	291.6	-0.116064	291.6	-0.1747616	291.6	-0.1333788	291.6	-0.1365032	291.6	-0.1559538	291.6	-0.1144908	291.6	-0.1122686	291.6	-0.1116443
291.8	1.45814	291.8	1.343777	291.8	1.29877	291.8	1.273957	291.8	1.142883	291.8	1.14013	291.8	1.178419	291.8	-0.1152584	291.8	-0.1154585	291.8	-0.1774983	291.8	-0.1332821	291.8	-0.1372071	291.8	-0.1550695	291.8	-0.1153091	291.8	-0.109473	291.8	-0.1105627
292	1.466157	292	1.342774	292	1.299729	292	1.274539	292	1.140906	292	1.137386	292	1.171969	292	-0.1131386	292	-0.1187225	292	-0.1709133	292	-0.1303865	292	-0.1382267	292	-0.1562748	292	-0.1131054	292	-0.1124484	292	-0.1118147
292.2	1.469634	292.2	1.344881	292.2	1.300072	292.2	1.273215	292.2	1.139837	292.2	1.145065	292.2	1.176294	292.2	-0.1200343	292.2	-0.1139155	292.2	-0.1782904	292.2	-0.1271909	292.2	-0.1358735	292.2	-0.1538135	292.2	-0.1177053	292.2	-0.1134121	292.2	-0.1086995
292.4	1.464596	292.4	1.345074	292.4	1.303435	292.4	1.274601	292.4	1.141291	292.4	1.139384	292.4	1.175219	292.4	-0.1162214	292.4	-0.115147	292.4	-0.1792084	292.4	-0.1328037	292.4	-0.1376813	292.4	-0.1544423	292.4	-0.1142081	292.4	-0.1090121	292.4	-0.1155641
292.6	1.465403	292.6	1.346958	292.6	1.296987	292.6	1.271784	292.6	1.144836	292.6	1.139806	292.6	1.184591	292.6	-0.1161199	292.6	-0.1159545	292.6	-0.175273	292.6	-0.1328189	292.6	-0.1395988	292.6	-0.156599	292.6	-0.1120924	292.6	-0.1130822	292.6	-0.1101831
292.8	1.467961	292.8	1.349121	292.8	1.297456	292.8	1.273144	292.8	1.141906	292.8	1.143521	292.8	1.173759	292.8	-0.1167035	292.8	-0.1129666	292.8	-0.1757047	292.8	-0.1346431	292.8	-0.1386306	292.8	-0.1507137	292.8	-0.1116373	292.8	-0.1120164	292.8	-0.1121816
293	1.465861	293	1.346282	293	1.300526	293	1.278835	293	1.13924	293	1.140381	293	1.178999	293	-0.1146808	293	-0.1089251	293	-0.1705822	293	-0.1305306	293	-0.1333573	293	-0.1527949	293	-0.1123577	293	-0.1109293	293	-0.1105387
293.2	1.469031	293.2	1.345498	293.2	1.29975	293.2	1.271614	293.2	1.145496	293.2	1.136721	293.2	1.179099	293.2	-0.10812	293.2	-0.1125332	293.2	-0.1701808	293.2	-0.1337299	293.2	-0.1376654	293.2	-0.156821	293.2	-0.1150176	293.2	-0.1102044	293.2	-0.112162
293.4	1.465261	293.4	1.348855	293.4	1.299436	293.4	1.279968	293.4	1.144184	293.4	1.142352	293.4	1.177835	293.4	-0.1156231	293.4	-0.1116508	293.4	-0.1761811	293.4	-0.1303159	293.4	-0.140139	293.4	-0.1557014	293.4	-0.117326	293.4	-0.1093043	293.4	-0.1142944
293.6	1.459899	293.6	1.347119	293.6	1.30176	293.6	1.280559	293.6	1.142908	293.6	1.143869	293.6	1.181622	293.6	-0.1142302	293.6	-0.1154781	293.6	-0.1754825	293.6	-0.128288	293.6	-0.13785	293.6	-0.1524744	293.6	-0.1169997	293.6	-0.1094455	293.6	-0.1142989
293.8	1.472489	293.8	1.349826	293.8	1.302346	293.8	1.275284	293.8	1.147277	293.8	1.14242	293.8	1.183465	293.8	-0.1129778	293.8	-0.110801	293.8	-0.1763734	293.8	-0.1312195	293.8	-0.1362707	293.8	-0.1565565	293.8	-0.1146388	293.8	-0.1084203	293.8	-0.1084336
294	1.467098	294	1.349576	294	1.302665	294	1.275701	294	1.143035	294	1.141105	294	1.183595	294	-0.115495	294	-0.1119086	294	-0.1721146	294	-0.1278256	294	-0.1356537	294	-0.1529996	294	-0.1127883	294	-0.1095779	294	-0.1093257
294.2	1.467822	294.2	1.347872	294.2	1.304593	294.2	1.280322	294.2	1.14838	294.2	1.140933	294.2	1.182491	294.2	-0.1155165	294.2	-0.1140057	294.2	-0.1709431	294.2	-0.1271292	294.2	-0.128457	294.2	-0.1516057	294.2	-0.1125103	294.2	-0.1088249	294.2	-0.1075468
294.4	1.469577	294.4	1.349424	294.4	1.309438	294.4	1.279756	294.4	1.140256	294.4	1.144565	294.4	1.178333	294.4	-0.1168451	294.4	-0.1165536	294.4	-0.1698759	294.4	-0.1342104	294.4	-0.1364209	294.4	-0.1532295	294.4	-0.1131601	294.4	-0.1085792	294.4	-0.1118844
294.6	1.466859	294.6	1.34919	294.6	1.305521	294.6	1.279783	294.6	1.143529	294.6	1.142629	294.6	1.184075	294.6	-0.1143632	294.6	-0.1146906	294.6	-0.1710422	294.6	-0.1299894	294.6	-0.1387146	294.6	-0.1528352	294.6	-0.1119129	294.6	-0.1072878	294.6	-0.1095157
294.8	1.47006	294.8	1.350201	294.8	1.308097	294.8	1.279956	294.8	1.148638	294.8	1.142064	294.8	1.176242	294.8	-0.1173089	294.8	-0.1123126	294.8	-0.1743742	294.8	-0.129367	294.8	-0.1355587	294.8	-0.1490956	294.8	-0.1161596	294.8	-0.1110325	294.8	-0.1078925
295	1.469762	295	1.351005	295	1.306683	295	1.28202	295	1.144449	295	1.144289	295	1.178409	295	-0.1101162	295	-0.1100668	295	-0.175416	295	-0.1304803	295	-0.1352811	295	-0.1559663	295	-0.116781	295	-0.1112752	295	-0.1061651
295.2	1.47212	295.2	1.348512	295.2	1.303939	295.2	1.276913	295.2	1.145553	295.2	1.146776	295.2	1.186948	295.2	-0.1129186	295.2	-0.1153358	295.2	-0.1698343	295.2	-0.1311239	295.2	-0.136164	295.2	-0.1524783	295.2	-0.1170252	295.2	-0.1110758	295.2	-0.1080662
295.4	1.468996	295.4	1.348611	295.4	1.307457	295.4	1.285182	295.4	1.144569	295.4	1.14676	295.4	1.185003	295.4	-0.1162718	295.4	-0.1090634	295.4	-0.1737376	295.4	-0.1299756	295.4	-0.1306695	295.4	-0.1518168	295.4	-0.1179794	295.4	-0.1096412	295.4	-0.1124224
295.6	1.468945	295.6	1.355235	295.6	1.308586	295.6	1.284435	295.6	1.147005	295.6	1.145053	295.6	1.183639	295.6	-0.1122325	295.6	-0.1158513	295.6	-0.169189	295.6	-0.1281413	295.6	-0.1369923	295.6	-0.1483458	295.6	-0.1160922	295.6	-0.1073047	295.6	-0.1103809
295.8	1.471792	295.8	1.350519	295.8	1.307887	295.8	1.282004	295.8	1.14788	295.8	1.145515	295.8	1.177434	295.8	-0.1120318	295.8	-0.1140415	295.8	-0.1697792	295.8	-0.1271406	295.8	-0.1349552	295.8	-0.1505659	295.8	-0.1135805	295.8	-0.1132421	295.8	-0.1108022
296	1.471301	296	1.355264	296	1.309312	296	1.281253	296	1.150289	296	1.147925	296	1.180077	296	-0.1182841	296	-0.1078991	296	-0.1768171	296	-0.1253809	296	-0.1342122	296	-0.1550201	296	-0.1166314	296	-0.1076904	296	-0.1064397
296.2	1.468909	296.2	1.353426	296.2	1.307104	296.2	1.279034	296.2	1.14884	296.2	1.145083	296.2	1.181504	296.2	-0.1144941	296.2	-0.111913	296.2	-0.1720076	296.2	-0.1258482	296.2	-0.1340254	296.2	-0.1504305	296.2	-0.1130659	296.2	-0.1107351	296.2	-0.1104739
296.4	1.470483	296.4	1.353172	296.4	1.30462	296.4	1.275378	296.4	1.146154	296.4	1.147973	296.4	1.182529	296.4	-0.115997	296.4	-0.1089659	296.4	-0.1749893	296.4	-0.1261616	296.4	-0.1385223	296.4	-0.15167	296.4	-0.1105157	296.4	-0.1066728	296.4	-0.1081626
296.6	1.470345	296.6	1.35082	296.6	1.310517	296.6	1.277065	296.6	1.147847	296.6	1.14681	296.6	1.181707	296.6	-0.1141426	296.6	-0.1127506	296.6	-0.1701049	296.6	-0.1241678	296.6	-0.1339184	296.6	-0.1477219	296.6	-0.1115743	296.6	-0.1106793	296.6	-0.1111826
296.8	1.469725	296.8	1.350978	296.8	1.308357	296.8	1.280985	296.8	1.148465	296.8	1.145194	296.8	1.181762	296.8	-0.1182423	296.8	-0.110563	296.8	-0.1715044	296.8	-0.1328843	296.8	-0.1375707	296.8	-0.1510906	296.8	-0.111603	296.8	-0.1091758	296.8	-0.11102
297	1.469297	297	1.352948	297	1.306356	297	1.283003	297	1.146382	297	1.145229	297	1.184973	297	-0.1099421	297	-0.1059449	297	-0.1744152	297	-0.1298151	297	-0.1391879	297	-0.1552641	297	-0.1185089	297	-0.1081053	297	-0.1123505
297.2	1.472062	297.2	1.353261	297.2	1.31256	297.2	1.282257	297.2	1.148596	297.2	1.145569	297.2	1.179529	297.2	-0.1136392	297.2	-0.1094384	297.2	-0.172541	297.2	-0.1268246	297.2	-0.134137	297.2	-0.1512977	297.2	-0.1081087	297.2	-0.1087912	297.2	-0.1114724
297.4	1.475099	297.4	1.359231	297.4	1.304274	297.4	1.282887	297.4	1.146206	297.4	1.148663	297.4	1.185997	297.4	-0.1094266	297.4	-0.1080634	297.4	-0.1682	297.4	-0.1270559	297.4	-0.1407485	297.4	-0.152349	297.4	-0.109496	297.4	-0.1155358	297.4	-0.1088494
297.6	1.469775	297.6	1.355971	297.6	1.309242	297.6	1.282746	297.6	1.148732	297.6	1.147424	297.6	1.183584	297.6	-0.1129661	297.6	-0.1145155	297.6	-0.1720598	297.6	-0.1329517	297.6	-0.13576	297.6	-0.152627	297.6	-0.1161135	297.6	-0.1114502	297.6	-0.1110426
297.8	1.46998	297.8	1.356407	297.8	1.304895	297.8	1.284668	297.8	1.147369	297.8	1.141349	297.8	1.186825	297.8	-0.11515	297.8	-0.1085801	297.8	-0.1722163	297.8	-0.1277419	297.8	-0.1351033	297.8	-0.149623	297.8	-0.1126055	297.8	-0.106265	297.8	-0.1119718
298	1.473701	298	1.351423	298	1.308961	298	1.280263	298	1.150363	298	1.145258	298	1.184762	298	-0.1149078	298	-0.1094172	298	-0.1748986	298	-0.1262252	298	-0.1336103	298	-0.1499486	298	-0.108704	298	-0.1104777	298	-0.1100483
298.2	1.475742	298.2	1.361964	298.2	1.312035	298.2	1.28542	298.2	1.148866	298.2	1.144316	298.2	1.181442	298.2	-0.1144131	298.2	-0.1111657	298.2	-0.1697521	298.2	-0.1287329	298.2	-0.1376364	298.2	-0.1529191	298.2	-0.1178283	298.2	-0.1086338	298.2	-0.1103232
298.4	1.474501	298.4	1.357818	298.4	1.318302	298.4	1.28432	298.4	1.151075	298.4	1.145701	298.4	1.185043	298.4	-0.1139459	298.4	-0.1109955	298.4	-0.1720468	298.4	-0.128031	298.4	-0.1383593	298.4	-0.15353	298.4	-0.1135286	298.4	-0.1089441	298.4	-0.10556
298.6	1.478864	298.6	1.357178	298.6	1.31343	298.6	1.285376	298.6	1.150903	298.6	1.1469	298.6	1.188048	298.6	-0.1129134	298.6	-0.1110829	298.6	-0.1672112	298.6	-0.1271719	298.6	-0.1333398	298.6	-0.1498334	298.6	-0.1083193	298.6	-0.111417	298.6	-0.1144888
298.8	1.473225	298.8	1.358949	298.8	1.313076	298.8	1.287414	298.8	1.146384	298.8	1.146361	298.8	1.180367	298.8	-0.1141307	298.8	-0.1091694	298.8	-0.1720916	298.8	-0.1272921	298.8	-0.1338254	298.8	-0.1552713	298.8	-0.1095344	298.8	-0.1060961	298.8	-0.1120272
299	1.476406	299	1.360278	299	1.308417	299	1.280558	299	1.151663	299	1.148286	299	1.180161	299	-0.1137002	299	-0.1108433	299	-0.1691464	299	-0.1285024	299	-0.1335978	299	-0.1482649	299	-0.1108309	299	-0.1083082	299	-0.1056996
299.2	1.472811	299.2	1.354788	299.2	1.310088	299.2	1.284137	299.2	1.15179	299.2	1.146142	299.2	1.178535	299.2	-0.1108741	299.2	-0.1137715	299.2	-0.171489	299.2	-0.1281242	299.2	-0.134119	299.2	-0.1511386	299.2	-0.1132353	299.2	-0.1077169	299.2	-0.1118861
299.4	1.477116	299.4	1.355162	299.4	1.3176	299.4	1.291691	299.4	1.152865	299.4	1.147771	299.4	1.176749	299.4	-0.111362	299.4	-0.1088013	299.4	-0.1696832	299.4	-0.1265909	299.4	-0.1325043	299.4	-0.1510023	299.4	-0.1124019	299.4	-0.1083437	299.4	-0.1116312
299.6	1.479704	299.6	1.358079	299.6	1.311833	299.6	1.289623	299.6	1.154634	299.6	1.143054	299.6	1.182534	299.6	-0.1115697	299.6	-0.1061512	299.6	-0.1734065	299.6	-0.1305098	299.6	-0.1339309	299.6	-0.1508537	299.6	-0.1137666	299.6	-0.1096958	299.6	-0.1119855
299.8	1.482299	299.8	1.354295	299.8	1.310169	299.8	1.289389	299.8	1.150852	299.8	1.149585	299.8	1.188271	299.8	-0.1129128	299.8	-0.1109125	299.8	-0.1700664	299.8	-0.1272542	299.8	-0.1338237	299.8	-0.1533604	299.8	-0.1130168	299.8	-0.1068995	299.8	-0.1104123
300	1.4717	300	1.35849	300	1.313233	300	1.287167	300	1.153412	300	1.150452	300	1.186361	300	-0.1103527	300	-0.1126253	300	-0.1773231	300	-0.1312562	300	-0.1332539	300	-0.1498408	300	-0.1142147	300	-0.1038314	300	-0.1082642
300.2	1.47889	300.2	1.356976	300.2	1.310155	300.2	1.290547	300.2	1.154868	300.2	1.148324	300.2	1.188085	300.2	-0.1100333	300.2	-0.1063924	300.2	-0.1670778	300.2	-0.1302128	300.2	-0.1344007	300.2	-0.1501975	300.2	-0.1101215	300.2	-0.1051948	300.2	-0.1070439
300.4	1.478181	300.4	1.357299	300.4	1.31634	300.4	1.287157	300.4	1.153772	300.4	1.149793	300.4	1.185937	300.4	-0.1090379	300.4	-0.1114541	300.4	-0.1723253	300.4	-0.1294487	300.4	-0.1320701	300.4	-0.1434036	300.4	-0.1080238	300.4	-0.1053661	300.4	-0.1085235
300.6	1.481786	300.6	1.362844	300.6	1.317279	300.6	1.286902	300.6	1.147847	300.6	1.153972	300.6	1.182485	300.6	-0.1153624	300.6	-0.1098432	300.6	-0.1741241	300.6	-0.1288013	300.6	-0.1308474	300.6	-0.1532265	300.6	-0.1097629	300.6	-0.1101488	300.6	-0.1042398
300.8	1.479301	300.8	1.3607	300.8	1.313885	300.8	1.288975	300.8	1.154132	300.8	1.147258	300.8	1.180972	300.8	-0.1128971	300.8	-0.1088294	300.8	-0.1679018	300.8	-0.1303751	300.8	-0.1368931	300.8	-0.1482546	300.8	-0.1134553	300.8	-0.1060018	300.8	-0.1090785
301	1.476982	301	1.359367	301	1.31585	301	1.285004	301	1.149086	301	1.152683	301	1.187135	301	-0.1142178	301	-0.1082217	301	-0.171489	301	-0.1283534	301	-0.1338781	301	-0.1486765	301	-0.11229	301	-0.1057058	301	-0.1082585
301.2	1.477295	301.2	1.361892	301.2	1.318888	301.2	1.287668	301.2	1.154498	301.2	1.14623	301.2	1.186451	301.2	-0.1093763	301.2	-0.1130134	301.2	-0.169334	301.2	-0.1266775	301.2	-0.135005	301.2	-0.148219	301.2	-0.1181454	301.2	-0.1067996	301.2	-0.09863254
301.4	1.477631	301.4	1.361496	301.4	1.316299	301.4	1.288868	301.4	1.152084	301.4	1.148724	301.4	1.189062	301.4	-0.1113444	301.4	-0.1086424	301.4	-0.1734408	301.4	-0.1302771	301.4	-0.1320943	301.4	-0.1469797	301.4	-0.1125545	301.4	-0.1076217	301.4	-0.1062624
301.6	1.478602	301.6	1.358763	301.6	1.31893	301.6	1.290672	301.6	1.154635	301.6	1.15473	301.6	1.183772	301.6	-0.1134322	301.6	-0.1079653	301.6	-0.1731898	301.6	-0.1265049	301.6	-0.1333772	301.6	-0.1491093	301.6	-0.1099304	301.6	-0.1101948	301.6	-0.1075808
301.8	1.47708	301.8	1.368466	301.8	1.315122	301.8	1.286873	301.8	1.155299	301.8	1.152431	301.8	1.191472	301.8	-0.1100886	301.8	-0.1076333	301.8	-0.1645546	301.8	-0.1318504	301.8	-0.1312603	301.8	-0.1507374	301.8	-0.113726	301.8	-0.1066405	301.8	-0.1078295
302	1.480193	302	1.359889	302	1.317916	302	1.288705	302	1.154917	302	1.151911	302	1.189949	302	-0.1102399	302	-0.1053408	302	-0.1693663	302	-0.1289155	302	-0.1282666	302	-0.1529354	302	-0.1113503	302	-0.1042729	302	-0.110733
302.2	1.476535	302.2	1.362724	302.2	1.315477	302.2	1.285343	302.2	1.152971	302.2	1.1496	302.2	1.190593	302.2	-0.1121911	302.2	-0.1075532	302.2	-0.1733547	302.2	-0.1315987	302.2	-0.1297033	302.2	-0.1526768	302.2	-0.1112186	302.2	-0.1036914	302.2	-0.1036436
302.4	1.482503	302.4	1.363982	302.4	1.318572	302.4	1.289674	302.4	1.155286	302.4	1.152124	302.4	1.187494	302.4	-0.1115722	302.4	-0.1094874	302.4	-0.1697762	302.4	-0.1300531	302.4	-0.13479	302.4	-0.148399	302.4	-0.1077418	302.4	-0.1069305	302.4	-0.109004
302.6	1.484565	302.6	1.35787	302.6	1.31768	302.6	1.291548	302.6	1.152902	302.6	1.151928	302.6	1.187369	302.6	-0.1073735	302.6	-0.1106095	302.6	-0.1690121	302.6	-0.1300611	302.6	-0.1347315	302.6	-0.1543445	302.6	-0.1078618	302.6	-0.09999955	302.6	-0.1083322
302.8	1.484887	302.8	1.360889	302.8	1.315941	302.8	1.289589	302.8	1.15809	302.8	1.153939	302.8	1.187576	302.8	-0.1106337	302.8	-0.1124028	302.8	-0.1660428	302.8	-0.1243099	302.8	-0.1321795	302.8	-0.1513479	302.8	-0.11053	302.8	-0.1071845	302.8	-0.1053561
303	1.483123	303	1.363536	303	1.314826	303	1.291736	303	1.161442	303	1.152115	303	1.184776	303	-0.1090193	303	-0.1069577	303	-0.1686243	303	-0.1265115	303	-0.131905	303	-0.1493314	303	-0.108336	303	-0.1041826	303	-0.1073745
303.2	1.487491	303.2	1.361289	303.2	1.314733	303.2	1.290626	303.2	1.151493	303.2	1.151681	303.2	1.181534	303.2	-0.1103249	303.2	-0.1097299	303.2	-0.1700307	303.2	-0.1276743	303.2	-0.130359	303.2	-0.1492417	303.2	-0.1082655	303.2	-0.1058903	303.2	-0.1089288
303.4	1.481513	303.4	1.363942	303.4	1.31619	303.4	1.290096	303.4	1.156879	303.4	1.156633	303.4	1.190859	303.4	-0.1081527	303.4	-0.1094369	303.4	-0.1698856	303.4	-0.1218768	303.4	-0.1359293	303.4	-0.1450348	303.4	-0.1102855	303.4	-0.1080541	303.4	-0.1052122
303.6	1.487736	303.6	1.361379	303.6	1.321777	303.6	1.290635	303.6	1.158282	303.6	1.153563	303.6	1.186415	303.6	-0.1093883	303.6	-0.108752	303.6	-0.1757043	303.6	-0.1307088	303.6	-0.1315778	303.6	-0.1501928	303.6	-0.1078941	303.6	-0.1050699	303.6	-0.1067978
303.8	1.485052	303.8	1.360894	303.8	1.318496	303.8	1.293747	303.8	1.158825	303.8	1.153543	303.8	1.188476	303.8	-0.1116975	303.8	-0.1068505	303.8	-0.1688753	303.8	-0.1299816	303.8	-0.136079	303.8	-0.1490947	303.8	-0.1120424	303.8	-0.1086639	303.8	-0.1086875
304	1.486156	304	1.366606	304	1.320096	304	1.294352	304	1.155193	304	1.152787	304	1.187044	304	-0.1106292	304	-0.1085132	304	-0.1705289	304	-0.1258442	304	-0.1280072	304	-0.1465269	304	-0.1103901	304	-0.1056085	304	-0.1048186
304.2	1.482601	304.2	1.362084	304.2	1.323778	304.2	1.292547	304.2	1.158985	304.2	1.153242	304.2	1.192364	304.2	-0.1087909	304.2	-0.1079137	304.2	-0.1700067	304.2	-0.1312162	304.2	-0.1312045	304.2	-0.1478927	304.2	-0.1116969	304.2	-0.107736	304.2	-0.1054224
304.4	1.487614	304.4	1.363384	304.4	1.321008	304.4	1.296481	304.4	1.159587	304.4	1.156907	304.4	1.186853	304.4	-0.1061324	304.4	-0.1084534	304.4	-0.1701954	304.4	-0.126365	304.4	-0.1284893	304.4	-0.151631	304.4	-0.1133147	304.4	-0.1098794	304.4	-0.1095737
304.6	1.487781	304.6	1.36672	304.6	1.32666	304.6	1.294018	304.6	1.158258	304.6	1.15379	304.6	1.186817	304.6	-0.1124209	304.6	-0.1128127	304.6	-0.1679061	304.6	-0.1228216	304.6	-0.1266463	304.6	-0.148568	304.6	-0.1108141	304.6	-0.1084794	304.6	-0.1057932
304.8	1.486781	304.8	1.368367	304.8	1.321563	304.8	1.295301	304.8	1.151686	304.8	1.153443	304.8	1.189679	304.8	-0.1061408	304.8	-0.1083799	304.8	-0.1647439	304.8	-0.1255633	304.8	-0.1301645	304.8	-0.1474122	304.8	-0.1090899	304.8	-0.1054547	304.8	-0.1043104
305	1.488538	305	1.36604	305	1.324918	305	1.293406	305	1.158423	305	1.150315	305	1.190858	305	-0.1093702	305	-0.1098599	305	-0.1717529	305	-0.1283072	305	-0.1298474	305	-0.1468212	305	-0.1070262	305	-0.1083909	305	-0.1056
305.2	1.489144	305.2	1.364047	305.2	1.319534	305.2	1.294305	305.2	1.155141	305.2	1.15499	305.2	1.187681	305.2	-0.1102547	305.2	-0.1066248	305.2	-0.1683057	305.2	-0.1291505	305.2	-0.1302197	305.2	-0.1521142	305.2	-0.1058535	305.2	-0.1048789	305.2	-0.1103848
305.4	1.481215	305.4	1.366173	305.4	1.322402	305.4	1.295116	305.4	1.161185	305.4	1.156661	305.4	1.188593	305.4	-0.1140308	305.4	-0.1086261	305.4	-0.165791	305.4	-0.1288633	305.4	-0.1319115	305.4	-0.1482256	305.4	-0.1089251	305.4	-0.1065812	305.4	-0.1083938
305.6	1.485761	305.6	1.363674	305.6	1.325228	305.6	1.296035	305.6	1.157989	305.6	1.156545	305.6	1.190401	305.6	-0.1071747	305.6	-0.1089533	305.6	-0.1683219	305.6	-0.1219835	305.6	-0.131577	305.6	-0.1461328	305.6	-0.1072359	305.6	-0.1084693	305.6	-0.1098705
305.8	1.483707	305.8	1.369416	305.8	1.326236	305.8	1.298866	305.8	1.15913	305.8	1.156874	305.8	1.190327	305.8	-0.1039121	305.8	-0.1060754	305.8	-0.1714644	305.8	-0.1264272	305.8	-0.1300923	305.8	-0.1482786	305.8	-0.1091746	305.8	-0.102916	305.8	-0.1068765
306	1.485394	306	1.368529	306	1.322021	306	1.300164	306	1.160174	306	1.154195	306	1.189097	306	-0.1041435	306	-0.1118978	306	-0.1696823	306	-0.126981	306	-0.131951	306	-0.1507065	306	-0.1107018	306	-0.106308	306	-0.1094287
306.2	1.487152	306.2	1.368469	306.2	1.325475	306.2	1.29303	306.2	1.157372	306.2	1.15849	306.2	1.193876	306.2	-0.1058251	306.2	-0.1034417	306.2	-0.1683603	306.2	-0.124218	306.2	-0.1293703	306.2	-0.1467533	306.2	-0.1096093	306.2	-0.1010447	306.2	-0.1093988
306.4	1.484126	306.4	1.373094	306.4	1.325448	306.4	1.298421	306.4	1.165601	306.4	1.156667	306.4	1.190195	306.4	-0.1091839	306.4	-0.1090564	306.4	-0.1675737	306.4	-0.1249221	306.4	-0.1288361	306.4	-0.1461485	306.4	-0.1081601	306.4	-0.1055333	306.4	-0.1079742
306.6	1.488571	306.6	1.374931	306.6	1.322642	306.6	1.294833	306.6	1.161793	306.6	1.156275	306.6	1.190031	306.6	-0.1114503	306.6	-0.1088268	306.6	-0.1711368	306.6	-0.1276182	306.6	-0.1290569	306.6	-0.1479139	306.6	-0.1102569	306.6	-0.1023789	306.6	-0.1013049
306.8	1.491491	306.8	1.366513	306.8	1.327053	306.8	1.30116	306.8	1.164275	306.8	1.153545	306.8	1.193426	306.8	-0.107203	306.8	-0.1116351	306.8	-0.1682613	306.8	-0.1243122	306.8	-0.1305371	306.8	-0.1484427	306.8	-0.1049546	306.8	-0.1031885	306.8	-0.1059005
307	1.489313	307	1.371449	307	1.330327	307	1.298963	307	1.15955	307	1.155667	307	1.190013	307	-0.1088845	307	-0.106346	307	-0.1726048	307	-0.1250609	307	-0.1256492	307	-0.1449521	307	-0.1110566	307	-0.09742045	307	-0.1045597
307.2	1.489481	307.2	1.371931	307.2	1.327759	307.2	1.30007	307.2	1.16668	307.2	1.158016	307.2	1.193428	307.2	-0.1093957	307.2	-0.1073432	307.2	-0.1664091	307.2	-0.1243348	307.2	-0.1331417	307.2	-0.1481608	307.2	-0.1049443	307.2	-0.1072481	307.2	-0.1039174
307.4	1.493123	307.4	1.372123	307.4	1.328131	307.4	1.300857	307.4	1.160803	307.4	1.158455	307.4	1.189598	307.4	-0.1071176	307.4	-0.1101765	307.4	-0.1686808	307.4	-0.127014	307.4	-0.1268365	307.4	-0.145736	307.4	-0.1076874	307.4	-0.1063831	307.4	-0.1014326
307.6	1.494211	307.6	1.372292	307.6	1.326138	307.6	1.299168	307.6	1.165263	307.6	1.151658	307.6	1.191481	307.6	-0.1065268	307.6	-0.1040998	307.6	-0.1650577	307.6	-0.1261841	307.6	-0.1280329	307.6	-0.1457444	307.6	-0.1099955	307.6	-0.1057414	307.6	-0.103665
307.8	1.488872	307.8	1.367548	307.8	1.326764	307.8	1.30091	307.8	1.165535	307.8	1.15682	307.8	1.186483	307.8	-0.108793	307.8	-0.105237	307.8	-0.1659936	307.8	-0.1228804	307.8	-0.1266523	307.8	-0.1478947	307.8	-0.1101105	307.8	-0.1076373	307.8	-0.1080014
308	1.488171	308	1.370006	308	1.328846	308	1.300822	308	1.166227	308	1.160957	308	1.191803	308	-0.1139316	308	-0.1058777	308	-0.168134	308	-0.1218745	308	-0.1273199	308	-0.1483129	308	-0.1109072	308	-0.1041681	308	-0.1054214
308.2	1.492176	308.2	1.376796	308.2	1.32662	308.2	1.297653	308.2	1.16307	308.2	1.159138	308.2	1.193255	308.2	-0.1055018	308.2	-0.1074834	308.2	-0.1670501	308.2	-0.1260052	308.2	-0.1337613	308.2	-0.1465517	308.2	-0.1076706	308.2	-0.1007997	308.2	-0.1058375
308.4	1.492701	308.4	1.377078	308.4	1.328397	308.4	1.302119	308.4	1.164822	308.4	1.159362	308.4	1.193911	308.4	-0.1049955	308.4	-0.1057306	308.4	-0.1651422	308.4	-0.1196053	308.4	-0.1312316	308.4	-0.1491625	308.4	-0.1087657	308.4	-0.1029578	308.4	-0.1076426
308.6	1.493227	308.6	1.374418	308.6	1.328619	308.6	1.2993	308.6	1.162552	308.6	1.159563	308.6	1.195053	308.6	-0.1030629	308.6	-0.1060029	308.6	-0.1719114	308.6	-0.1227762	308.6	-0.1258018	308.6	-0.1498585	308.6	-0.1115806	308.6	-0.107104	308.6	-0.1069637
308.8	1.49357	308.8	1.375894	308.8	1.331695	308.8	1.304393	308.8	1.161704	308.8	1.162335	308.8	1.192308	308.8	-0.1063981	308.8	-0.1045942	308.8	-0.1698899	308.8	-0.1227117	308.8	-0.1309783	308.8	-0.1483775	308.8	-0.1126385	308.8	-0.09902769	308.8	-0.1056821
309	1.490842	309	1.368975	309	1.328953	309	1.301546	309	1.171549	309	1.15997	309	1.197916	309	-0.1057509	309	-0.09927993	309	-0.1725316	309	-0.1289403	309	-0.1308352	309	-0.1529984	309	-0.1058134	309	-0.1061806	309	-0.1086204
309.2	1.492568	309.2	1.373473	309.2	1.325923	309.2	1.305966	309.2	1.167125	309.2	1.15786	309.2	1.19378	309.2	-0.1013719	309.2	-0.1073789	309.2	-0.1658334	309.2	-0.1231148	309.2	-0.1312084	309.2	-0.1492016	309.2	-0.1117755	309.2	-0.1069947	309.2	-0.1025567
309.4	1.491733	309.4	1.372256	309.4	1.334263	309.4	1.302496	309.4	1.164168	309.4	1.16104	309.4	1.196918	309.4	-0.1082259	309.4	-0.1088566	309.4	-0.1641039	309.4	-0.1229236	309.4	-0.1305094	309.4	-0.1452356	309.4	-0.1088849	309.4	-0.1051478	309.4	-0.1044254
309.6	1.491635	309.6	1.378234	309.6	1.328013	309.6	1.30644	309.6	1.167946	309.6	1.160036	309.6	1.19048	309.6	-0.1130891	309.6	-0.1071563	309.6	-0.1693205	309.6	-0.1260666	309.6	-0.1315439	309.6	-0.1460506	309.6	-0.1043345	309.6	-0.09977894	309.6	-0.1045547
309.8	1.489695	309.8	1.380531	309.8	1.332715	309.8	1.298652	309.8	1.164668	309.8	1.158547	309.8	1.193922	309.8	-0.1043962	309.8	-0.1071404	309.8	-0.1688554	309.8	-0.1239425	309.8	-0.1340266	309.8	-0.1492286	309.8	-0.10635	309.8	-0.1044662	309.8	-0.1049459
310	1.492552	310	1.375224	310	1.33281	310	1.303984	310	1.16477	310	1.158798	310	1.19233	310	-0.1025059	310	-0.1055584	310	-0.1679751	310	-0.1217309	310	-0.1273722	310	-0.1446305	310	-0.1035251	310	-0.1057899	310	-0.1021208
310.2	1.497603	310.2	1.377507	310.2	1.331752	310.2	1.300931	310.2	1.160578	310.2	1.162249	310.2	1.196748	310.2	-0.10791	310.2	-0.1043399	310.2	-0.1677997	310.2	-0.1281563	310.2	-0.1225427	310.2	-0.148338	310.2	-0.1016869	310.2	-0.1053967	310.2	-0.1039355
310.4	1.495021	310.4	1.372902	310.4	1.328947	310.4	1.304708	310.4	1.169702	310.4	1.158279	310.4	1.19373	310.4	-0.1090334	310.4	-0.1078306	310.4	-0.1692352	310.4	-0.1205006	310.4	-0.1291666	310.4	-0.1446025	310.4	-0.1019082	310.4	-0.1065121	310.4	-0.1054603
310.6	1.491196	310.6	1.377199	310.6	1.332501	310.6	1.305351	310.6	1.166222	310.6	1.169715	310.6	1.196998	310.6	-0.104712	310.6	-0.1063073	310.6	-0.1703383	310.6	-0.127647	310.6	-0.1242134	310.6	-0.144983	310.6	-0.1095762	310.6	-0.1021845	310.6	-0.1081075
310.8	1.491902	310.8	1.369789	310.8	1.329717	310.8	1.306242	310.8	1.167365	310.8	1.161507	310.8	1.196013	310.8	-0.1066186	310.8	-0.1044857	310.8	-0.1649833	310.8	-0.1213377	310.8	-0.1354713	310.8	-0.1440885	310.8	-0.109167	310.8	-0.1031774	310.8	-0.1057565
311	1.493912	311	1.376189	311	1.329807	311	1.302885	311	1.16639	311	1.159985	311	1.195534	311	-0.105065	311	-0.1054942	311	-0.1729403	311	-0.1212178	311	-0.1246751	311	-0.1453278	311	-0.1065331	311	-0.1006745	311	-0.1034838
311.2	1.489203	311.2	1.372108	311.2	1.334818	311.2	1.305183	311.2	1.165843	311.2	1.162576	311.2	1.195063	311.2	-0.1018239	311.2	-0.1070952	311.2	-0.1699889	311.2	-0.1250215	311.2	-0.1306677	311.2	-0.1417318	311.2	-0.1095036	311.2	-0.09928238	311.2	-0.1042301
311.4	1.494443	311.4	1.37699	311.4	1.330773	311.4	1.302131	311.4	1.16677	311.4	1.163606	311.4	1.196031	311.4	-0.1059115	311.4	-0.1044263	311.4	-0.1702799	311.4	-0.1237195	311.4	-0.1289727	311.4	-0.1483611	311.4	-0.1081959	311.4	-0.09934106	311.4	-0.1027112
311.6	1.495759	311.6	1.377113	311.6	1.334897	311.6	1.304131	311.6	1.167579	311.6	1.163161	311.6	1.199906	311.6	-0.1082375	311.6	-0.1053609	311.6	-0.1614861	311.6	-0.1190466	311.6	-0.1332346	311.6	-0.142757	311.6	-0.1032206	311.6	-0.1064797	311.6	-0.1020136
311.8	1.493504	311.8	1.38119	311.8	1.335047	311.8	1.307535	311.8	1.167043	311.8	1.162383	311.8	1.201597	311.8	-0.09963377	311.8	-0.1031942	311.8	-0.1646092	311.8	-0.1213973	311.8	-0.127715	311.8	-0.1469788	311.8	-0.1054332	311.8	-0.09615106	311.8	-0.09916279
312.01	1.501369	312.01	1.374749	312.01	1.335421	312.01	1.305061	312.01	1.167437	312.01	1.164283	312.01	1.198175	312.01	-0.1035451	312	-0.1033724	312	-0.1657252	312	-0.1272187	312	-0.1275661	312	-0.1471626	312	-0.1083546	312	-0.1033204	312	-0.100989
312.2	1.497067	312.2	1.377927	312.2	1.334467	312.2	1.302846	312.2	1.175563	312.2	1.163324	312.2	1.197139	312.2	-0.1051962	312.2	-0.1032323	312.2	-0.1626113	312.2	-0.1190548	312.2	-0.1300002	312.2	-0.1470003	312.2	-0.1061474	312.2	-0.1025731	312.2	-0.1018014
312.4	1.494426	312.4	1.383832	312.4	1.335867	312.4	1.306549	312.4	1.168052	312.4	1.165837	312.4	1.198148	312.4	-0.1032227	312.4	-0.1051815	312.4	-0.1677575	312.4	-0.1233856	312.4	-0.1280669	312.4	-0.1450304	312.4	-0.1040349	312.4	-0.1036206	312.4	-0.1029788
312.6	1.49218	312.6	1.38115	312.6	1.337338	312.6	1.305685	312.6	1.171366	312.6	1.16271	312.6	1.197043	312.6	-0.1058012	312.6	-0.1018829	312.6	-0.1606541	312.6	-0.1206374	312.6	-0.1256812	312.6	-0.1481328	312.6	-0.1048428	312.6	-0.1056956	312.6	-0.1020579
312.8	1.496163	312.8	1.3751	312.8	1.337094	312.8	1.305058	312.8	1.170197	312.8	1.165874	312.8	1.200038	312.8	-0.1025789	312.8	-0.1026898	312.8	-0.1674476	312.8	-0.1227375	312.8	-0.1279905	312.8	-0.147633	312.8	-0.1082505	312.8	-0.1032043	312.8	-0.1062593
313	1.499828	313	1.379947	313	1.337303	313	1.305476	313	1.171289	313	1.163965	313	1.200647	313	-0.1083615	313	-0.1031477	313	-0.167107	313	-0.1228316	313	-0.1300208	313	-0.14901	313	-0.108868	313	-0.1029409	313	-0.09671628
313.2	1.499253	313.2	1.380545	313.2	1.334314	313.2	1.309166	313.2	1.171672	313.2	1.16452	313.2	1.199824	313.2	-0.1091145	313.2	-0.1060557	313.2	-0.1656588	313.2	-0.1205661	313.2	-0.1307322	313.2	-0.1467871	313.2	-0.1012622	313.2	-0.1024939	313.2	-0.1025829
313.4	1.504696	313.4	1.381747	313.4	1.335631	313.4	1.311192	313.4	1.168833	313.4	1.16578	313.4	1.19474	313.4	-0.1013593	313.4	-0.1065626	313.4	-0.1636744	313.4	-0.1234608	313.4	-0.1287187	313.4	-0.1448212	313.4	-0.1055363	313.4	-0.1015359	313.4	-0.103678
313.6	1.495466	313.6	1.383989	313.6	1.338464	313.6	1.311857	313.6	1.172508	313.6	1.165849	313.6	1.203014	313.6	-0.1057679	313.6	-0.1065302	313.6	-0.1614879	313.6	-0.121203	313.6	-0.1288545	313.6	-0.1409	313.6	-0.1060226	313.6	-0.1018658	313.6	-0.09707345
313.8	1.501558	313.8	1.383122	313.8	1.339452	313.8	1.308205	313.8	1.170263	313.8	1.164502	313.8	1.194004	313.8	-0.1033899	313.8	-0.1072778	313.8	-0.1664056	313.8	-0.1206255	313.8	-0.1279923	313.8	-0.1452239	313.8	-0.1050573	313.8	-0.1006892	313.8	-0.09980714
314	1.494719	314	1.380288	314	1.338648	314	1.308404	314	1.172596	314	1.166719	314	1.198746	314	-0.1023973	314	-0.1070357	314	-0.164338	314	-0.1222047	314	-0.1276281	314	-0.1453393	314	-0.1022474	314	-0.1024827	314	-0.1030795
314.2	1.498589	314.2	1.377211	314.2	1.344197	314.2	1.314882	314.2	1.167585	314.2	1.167339	314.2	1.196218	314.2	-0.1022919	314.2	-0.1069962	314.2	-0.1639475	314.2	-0.1228486	314.2	-0.1258993	314.2	-0.1506321	314.2	-0.1085985	314.2	-0.1034126	314.2	-0.1053179
314.4	1.506928	314.4	1.378702	314.4	1.33872	314.4	1.31077	314.4	1.173931	314.4	1.165164	314.4	1.197848	314.4	-0.09971569	314.4	-0.1067762	314.4	-0.1638147	314.4	-0.1205779	314.4	-0.128381	314.4	-0.1454621	314.4	-0.1036607	314.4	-0.101434	314.4	-0.1050369
314.6	1.502182	314.6	1.381487	314.6	1.339118	314.6	1.309985	314.6	1.177069	314.6	1.167911	314.6	1.203437	314.6	-0.1074042	314.6	-0.1050304	314.6	-0.1720213	314.6	-0.1238266	314.6	-0.1265073	314.6	-0.1482671	314.6	-0.1082555	314.6	-0.09987921	314.6	-0.09935966
314.8	1.499925	314.8	1.384889	314.8	1.339773	314.8	1.315851	314.8	1.171841	314.8	1.168105	314.8	1.200546	314.8	-0.1018972	314.8	-0.09944753	314.8	-0.1684621	314.8	-0.1228927	314.8	-0.1228294	314.8	-0.1463044	314.8	-0.1045041	314.8	-0.102784	314.8	-0.101559
315	1.503318	315	1.382218	315	1.337825	315	1.309673	315	1.172924	315	1.165708	315	1.199058	315	-0.1031403	315	-0.1050856	315	-0.167162	315	-0.1198324	315	-0.1252135	315	-0.1448991	315	-0.1122991	315	-0.1007058	315	-0.1021682
315.2	1.504315	315.2	1.383752	315.2	1.340271	315.2	1.316344	315.2	1.17307	315.2	1.16959	315.2	1.198176	315.2	-0.105281	315.2	-0.1046133	315.2	-0.1679052	315.2	-0.1216375	315.2	-0.1251352	315.2	-0.1492436	315.2	-0.1046112	315.2	-0.1051017	315.2	-0.1019019
315.4	1.497771	315.4	1.384659	315.4	1.337752	315.4	1.314084	315.4	1.175064	315.4	1.167696	315.4	1.200821	315.4	-0.102165	315.4	-0.1025176	315.4	-0.1659317	315.4	-0.1197308	315.4	-0.1272615	315.4	-0.145695	315.4	-0.1011553	315.4	-0.1042908	315.4	-0.1031257
315.6	1.504278	315.6	1.387766	315.6	1.33996	315.6	1.308427	315.6	1.173574	315.6	1.166782	315.6	1.20084	315.6	-0.1067318	315.6	-0.104785	315.6	-0.1696152	315.6	-0.1224188	315.6	-0.1271639	315.6	-0.1465144	315.6	-0.1032411	315.6	-0.1024975	315.6	-0.1050076
315.8	1.501762	315.8	1.382882	315.8	1.343761	315.8	1.317185	315.8	1.174384	315.8	1.163285	315.8	1.200364	315.8	-0.09991226	315.8	-0.1036436	315.8	-0.1681935	315.8	-0.1268818	315.8	-0.1232657	315.8	-0.1514792	315.8	-0.1055189	315.8	-0.1029804	315.8	-0.103911
316	1.506244	316	1.384706	316	1.341634	316	1.311072	316	1.171419	316	1.170427	316	1.201803	316	-0.1044685	316	-0.1035078	316	-0.1694779	316	-0.1263225	316	-0.1254171	316	-0.1453538	316	-0.1022551	316	-0.1008603	316	-0.1034493
316.2	1.504173	316.2	1.3904	316.2	1.339485	316.2	1.315039	316.2	1.172243	316.2	1.166503	316.2	1.198076	316.2	-0.103832	316.2	-0.1047798	316.2	-0.163929	316.2	-0.1198137	316.2	-0.1254246	316.2	-0.1417252	316.2	-0.09977721	316.2	-0.100599	316.2	-0.1059018
[truncated: 11,968 more rows]
