# Supplementary material for: Functional development of a V3/glycan-specific broadly neutralizing antibody isolated from a case of HIV superinfection
Source: eLife journal article supplement (doi:10.7554/elife.68110), 2021-07-15
Supplement: fig2-data2 [file RawData0.xls]

A5		B5		C5		D5		E5		F5		G5		H5		A6		B6		C6		D6		E6		F6		G6		H6
0	0	0	0	0	0	0	0	0	0	0	0	0	0	0	0	0	0	0	0	0	0	0	0	0	0	0	0	0	0	0	0
0.2	-0.00344045	0.2	0.0034477	0.2	0.00382492	0.2	-0.00207262	0.2	-0.00143237	0.2	0.00116394	0.2	0.00199256	0.2	-0.00362977	0.2	-0.00243199	0.2	0.00747307	0.2	0.00100095	0.2	0.0018086	0.2	-0.00313252	0.2	0.00272296	0.2	0.00123749	0.2	-0.0033988
0.4	-0.00267646	0.4	0.00303328	0.4	0.00694317	0.4	-0.00058098	0.4	0.00279993	0.4	0.00343948	0.4	0.00495246	0.4	-0.00194695	0.4	0.0053283	0.4	0.00707045	0.4	0.00424516	0.4	0.00016875	0.4	-0.0044964	0.4	0.00216073	0.4	-0.00132462	0.4	-0.00485779
0.6	-0.00018629	0.6	0.00490691	0.6	0.00312341	0.6	-0.00035032	0.6	-0.00047612	0.6	0.0029844	0.6	0.00022093	0.6	-0.00207034	0.6	0.0022819	0.6	0.00939863	0.6	-0.00071084	0.6	0.00056549	0.6	0.00377353	0.6	0.00209169	0.6	0.00453005	0.6	0.00344481
0.8	-0.00223416	0.8	0.00943987	0.8	0.00820823	0.8	0.00375579	0.8	-0.00132019	0.8	0.00431041	0.8	0.00081026	0.8	-0.00296139	0.8	0.00339474	0.8	0.0158225	0.8	0.00166457	0.8	0.00435652	0.8	0.00103763	0.8	0.00247476	0.8	0.00761041	0.8	-0.00128284
1	-0.00025514	1	0.00615347	1	0.00570103	1	0.00174945	1	-0.00391765	1	0.00405978	1	0.00648047	1	-0.00126197	1	0.00405711	1	0.01238588	1	-0.00012609	1	0.0014449	1	0.00268638	1	-0.00011849	1	0.00521027	1	0.00433212
1.2	-0.00164733	1.2	0.00657792	1.2	0.00927219	1.2	0.00221954	1.2	0.00270754	1.2	0.0073739	1.2	0.00281415	1.2	-0.00387485	1.2	0.00965492	1.2	0.01236377	1.2	0.0026086	1.2	0.00520224	1.2	0.00068255	1.2	0.00181668	1.2	0.00466876	1.2	0.0005943
1.4	0.00228943	1.4	0.00457071	1.4	0.00747773	1.4	-0.00041509	1.4	0.00329766	1.4	0.00320942	1.4	0.00610496	1.4	0.00061301	1.4	0.00439297	1.4	0.01514915	1.4	0.00347047	1.4	0.00296001	1.4	-0.000486	1.4	0.00763286	1.4	0.00412833	1.4	0.00015412
1.6	0.00338294	1.6	0.00680181	1.6	0.00472545	1.6	0.00132574	1.6	0.00458386	1.6	0.00341429	1.6	0.00744614	1.6	-0.00295418	1.6	0.00976742	1.6	0.01063935	1.6	0.00543781	1.6	0.00943072	1.6	0.00425218	1.6	0.00472555	1.6	0.00458123	1.6	0.00331505
1.8	0.00468566	1.8	0.00531561	1.8	0.00791396	1.8	0.0017163	1.8	0.0022458	1.8	0.00559626	1.8	0.00238569	1.8	-0.00182223	1.8	0.0071564	1.8	0.01096493	1.8	0.0044893	1.8	0.00835215	1.8	0.0068147	1.8	0.00910459	1.8	0.00413145	1.8	0.00148317
2	0.00576742	2	0.00634601	2	0.00860274	2	0.00576732	2	0.00042908	2	0.0028721	2	0.00995964	2	-0.00213969	2	0.00377335	2	0.01444677	2	0.00572178	2	0.00296555	2	0.00513365	2	0.0085663	2	0.00821123	2	0.00810888
2.2	0.00348472	2.2	0.00613112	2.2	0.00619628	2.2	0.00176238	2.2	0.00151855	2.2	0.00338768	2.2	0.00638165	2.2	0.00239471	2.2	0.0052777	2.2	0.01327285	2.2	0.0037648	2.2	0.0041896	2.2	0.00388351	2.2	0.00594839	2.2	0.01030301	2.2	-0.00170027
2.4	0.00150646	2.4	0.00678821	2.4	0.01231035	2.4	0.00446766	2.4	0.00018798	2.4	0.00809015	2.4	0.00522838	2.4	-0.00094414	2.4	0.00686559	2.4	0.0170414	2.4	0.00555305	2.4	0.00608461	2.4	0.00558742	2.4	0.00735611	2.4	0.00865328	2.4	0.00380657
2.6	0.00598163	2.6	0.00859029	2.6	0.00685725	2.6	0.00195963	2.6	0.00043249	2.6	0.00574813	2.6	0.0070586	2.6	0.00312029	2.6	0.00692223	2.6	0.01432302	2.6	0.00009067	2.6	0.0067784	2.6	0.0053611	2.6	0.00889063	2.6	0.00466337	2.6	0.00256236
2.8	0.00138108	2.8	0.00281496	2.8	0.00793032	2.8	0.00724648	2.8	0.00325327	2.8	0.00361307	2.8	0.01095271	2.8	-0.00099477	2.8	0.00569964	2.8	0.0127007	2.8	0.00208243	2.8	0.00240651	2.8	0.00132975	2.8	0.00152045	2.8	0.00324896	2.8	0.00334586
3	0.00165183	3	0.00519718	3	0.00986394	3	0.0071051	3	-0.0004423	3	0.00296959	3	0.00454939	3	-0.00008781	3	0.00794901	3	0.0155381	3	0.00819254	3	0.00844616	3	0.0073228	3	0.00716157	3	0.01037106	3	0.00087281
3.2	0.00129111	3.2	0.00636441	3.2	0.00971674	3.2	0.00728346	3.2	0.00455971	3.2	0.0116243	3.2	0.00682731	3.2	0.00320346	3.2	0.00583585	3.2	0.01127651	3.2	0.00250991	3.2	0.00656747	3.2	0.01208387	3.2	0.00416886	3.2	0.00654415	3.2	0.00126743
3.4	0.00328293	3.4	0.00626957	3.4	0.00946269	3.4	0.00529482	3.4	0.0013377	3.4	0.00670562	3.4	0.00715252	3.4	0.0025204	3.4	0.00317012	3.4	0.01639561	3.4	0.00266459	3.4	0.00814907	3.4	0.00524563	3.4	0.00442044	3.4	0.00371499	3.4	0.00298984
3.6	-0.00067606	3.6	0.00745706	3.6	0.00718919	3.6	0.00808012	3.6	0.00045029	3.6	0.00758256	3.6	0.00708901	3.6	0.00451626	3.6	0.00767195	3.6	0.0180012	3.6	0.00341257	3.6	0.00759942	3.6	0.003369	3.6	0.00792417	3.6	0.00353398	3.6	0.00470817
3.8	0.00499487	3.8	0.00718724	3.8	0.00728828	3.8	0.00779672	3.8	0.00151898	3.8	0.00415307	3.8	0.00609722	3.8	-0.00057264	3.8	0.00482643	3.8	0.01046026	3.8	0.0099487	3.8	0.00544251	3.8	0.00095522	3.8	0.01044348	3.8	0.00779291	3.8	0.00048335
4	0.0082967	4	0.01004466	4	0.00558109	4	0.00656376	4	-0.00151597	4	0.00856781	4	0.00923907	4	0.00337787	4	0.00843213	4	0.01309623	4	0.00669046	4	0.00788406	4	0.00401493	4	0.00662481	4	0.00522054	4	-0.00167283
4.2	0.00276074	4.2	0.00694234	4.2	0.00492964	4.2	0.00602831	4.2	0.00187824	4.2	0.00925253	4.2	0.00545051	4.2	0.00205098	4.2	0.00807147	4.2	0.01632164	4.2	0.00593674	4.2	0.00740999	4.2	0.0058159	4.2	0.00555551	4.2	0.01208872	4.2	0.00200434
4.4	-0.00051903	4.4	0.00373078	4.4	0.00662342	4.4	0.00696469	4.4	0.00441895	4.4	0.00714175	4.4	0.00836757	4.4	0.0040816	4.4	0.01045283	4.4	0.01549158	4.4	0.00618637	4.4	0.01188178	4.4	0.0052224	4.4	0.00763537	4.4	0.00769974	4.4	0.00668057
4.6	0.00748817	4.6	0.01029679	4.6	0.01108009	4.6	0.00515657	4.6	0.00397143	4.6	0.00697611	4.6	0.00984657	4.6	0.0050601	4.6	0.00961252	4.6	0.01442797	4.6	0.00546227	4.6	0.00774873	4.6	0.00598794	4.6	0.0094749	4.6	0.00472504	4.6	0.00164625
4.8	0.00657112	4.8	0.00648482	4.8	0.01034054	4.8	0.00615949	4.8	0.00399611	4.8	0.00398526	4.8	0.00644771	4.8	0.00545314	4.8	0.00562623	4.8	0.01330491	4.8	0.0038293	4.8	0.00451199	4.8	0.00787715	4.8	0.00762318	4.8	0.00948744	4.8	0.00789124
5	0.00551997	5	0.01182824	5	0.01060985	5	0.01154202	5	0.00471487	5	0.00663544	5	0.00628537	5	0.00374241	5	0.00617312	5	0.01685077	5	0.00760726	5	0.0077147	5	0.00675697	5	0.00653327	5	0.00494144	5	0.00778256
5.2	0.00546807	5.2	0.00485692	5.2	0.01182011	5.2	0.01042352	5.2	0.00439682	5.2	0.00957696	5.2	0.00694425	5.2	0.0012548	5.2	0.00938361	5.2	0.01909198	5.2	0.00878208	5.2	0.01084158	5.2	0.01029765	5.2	0.00848778	5.2	0.00829753	5.2	0.00295455
5.4	0.00615701	5.4	0.01175559	5.4	0.00996583	5.4	0.00674407	5.4	0.00609633	5.4	0.00588662	5.4	0.00928078	5.4	-0.0003435	5.4	0.01108086	5.4	0.01641186	5.4	0.00902527	5.4	0.01017631	5.4	0.00741992	5.4	0.00906223	5.4	0.01031652	5.4	0.00255725
5.6	0.0068828	5.6	0.00682729	5.6	0.00839873	5.6	0.01087066	5.6	0.0063553	5.6	0.00632624	5.6	0.00374381	5.6	0.0004458	5.6	0.00825299	5.6	0.01850619	5.6	0.00175376	5.6	0.00648203	5.6	0.00632425	5.6	0.00927373	5.6	0.01178582	5.6	0.00624292
5.8	0.00315847	5.8	0.01082464	5.8	0.0094153	5.8	0.01073384	5.8	0.00342897	5.8	0.00929363	5.8	0.00770331	5.8	0.0007051	5.8	0.00770756	5.8	0.0158249	5.8	0.00332327	5.8	0.00534533	5.8	0.00927937	5.8	0.00962093	5.8	0.00810401	5.8	0.0004607
6	0.00520248	6	0.00791374	6	0.00717453	6	0.01158999	6	0.00639279	6	0.00554742	6	0.00727445	6	-0.00182084	6	0.00631649	6	0.01720399	6	0.00361256	6	0.00920386	6	0.00718503	6	0.01163312	6	0.00817129	6	0.00778105
6.2	0.0034172	6.2	0.00663706	6.2	0.01460956	6.2	0.00996316	6.2	0.00391282	6.2	0.00882562	6.2	0.00883736	6.2	0.00110396	6.2	0.00880313	6.2	0.01932566	6.2	0.01128337	6.2	0.01082374	6.2	0.00729347	6.2	0.00754776	6.2	0.01109739	6.2	0.00622804
6.4	0.00701356	6.4	0.00856463	6.4	0.01408405	6.4	0.01161298	6.4	0.00346743	6.4	0.00894509	6.4	0.0101622	6.4	0.00403158	6.4	0.00756526	6.4	0.01599619	6.4	0.00645446	6.4	0.00762865	6.4	0.01222507	6.4	0.01187931	6.4	0.00819356	6.4	0.00519873
6.6	0.00567913	6.6	0.00960919	6.6	0.007602	6.6	0.00862657	6.6	0.00485161	6.6	0.00441026	6.6	0.00670972	6.6	0.00253534	6.6	0.00530745	6.6	0.01570509	6.6	0.0083378	6.6	0.01118748	6.6	0.01086652	6.6	0.00873159	6.6	0.00686705	6.6	0.00573048
6.8	0.00295373	6.8	0.01155836	6.8	0.01279492	6.8	0.00466585	6.8	0.00472292	6.8	0.00665618	6.8	0.00946862	6.8	0.00751347	6.8	0.01335238	6.8	0.01793973	6.8	0.00746708	6.8	0.01318309	6.8	0.00633778	6.8	0.00904296	6.8	0.01313741	6.8	0.00624421
7	0.00525588	7	0.00943275	7	0.01103583	7	0.00917991	7	0.00066594	7	0.01050756	7	0.0086713	7	-0.00227563	7	0.01131074	7	0.0204556	7	0.00403665	7	0.00828111	7	0.00650343	7	0.00960356	7	0.00760562	7	0.00493647
7.2	0.0086251	7.2	0.01219692	7.2	0.01213236	7.2	0.00991746	7.2	0.002472	7.2	0.00634355	7.2	0.00903963	7.2	0.00317388	7.2	0.01028926	7.2	0.01968814	7.2	0.00853017	7.2	0.01068334	7.2	0.00948929	7.2	0.01237211	7.2	0.00294513	7.2	0.00644952
7.4	0.00595732	7.4	0.00726397	7.4	0.01302945	7.4	0.00984996	7.4	0.00666404	7.4	0.01016932	7.4	0.01037217	7.4	0.00428499	7.4	0.01362169	7.4	0.01844213	7.4	0.00930855	7.4	0.01198093	7.4	0.00896666	7.4	0.00903645	7.4	0.00816864	7.4	0.00614682
7.6	0.00949734	7.6	0.00485286	7.6	0.01136712	7.6	0.00742887	7.6	0.00514956	7.6	0.0033793	7.6	0.0088865	7.6	0.00709225	7.6	0.01483784	7.6	0.01330152	7.6	0.00874237	7.6	0.00897581	7.6	0.00445851	7.6	0.01122686	7.6	0.01283246	7.6	0.00632005
7.8	0.00905923	7.8	0.00971072	7.8	0.0093697	7.8	0.01384043	7.8	0.00693207	7.8	0.00948808	7.8	0.01089934	7.8	0.00219645	7.8	0.00974718	7.8	0.01940722	7.8	0.00890262	7.8	0.0095209	7.8	0.00834832	7.8	0.00802016	7.8	0.00982029	7.8	0.0074419
8	0.00687063	8	0.00629531	8	0.00682529	8	0.00818652	8	0.00779326	8	0.00556929	8	0.01221694	8	0.00388682	8	0.01224511	8	0.01213882	8	0.00622622	8	0.00938267	8	0.00975714	8	0.00657531	8	0.01528102	8	0.00517343
8.2	0.00746032	8.2	0.00867944	8.2	0.0106544	8.2	0.0096212	8.2	0.00823012	8.2	0.00940593	8.2	0.01073264	8.2	0.00361239	8.2	0.00659167	8.2	0.01931304	8.2	0.00985146	8.2	0.00806164	8.2	0.00851313	8.2	0.01062669	8.2	0.01150204	8.2	0.00537407
8.4	0.00523557	8.4	0.01224965	8.4	0.01038194	8.4	0.01022795	8.4	0.0069895	8.4	0.00715964	8.4	0.01123871	8.4	0.00295199	8.4	0.01016471	8.4	0.01999192	8.4	0.00693452	8.4	0.01007766	8.4	0.00551673	8.4	0.01559101	8.4	0.00847433	8.4	0.00601784
8.6	0.00496955	8.6	0.00978405	8.6	0.0107712	8.6	0.00931364	8.6	0.00429949	8.6	0.00512662	8.6	0.01105859	8.6	-0.00260527	8.6	0.00993945	8.6	0.01549156	8.6	0.01113732	8.6	0.01367881	8.6	0.01097605	8.6	0.00943945	8.6	0.00602503	8.6	0.0070483
8.8	0.00681142	8.8	0.01315578	8.8	0.01016271	8.8	0.00859161	8.8	0.0008634	8.8	0.00870028	8.8	0.00977791	8.8	0.00510869	8.8	0.01205579	8.8	0.01902091	8.8	0.00469561	8.8	0.00982867	8.8	0.00581534	8.8	0.00945858	8.8	0.0082846	8.8	0.00691442
9	0.00365496	9	0.01185718	9	0.01021006	9	0.01267668	9	0.00671391	9	0.00615369	9	0.01083337	9	0.00319803	9	0.00880439	9	0.0148637	9	0.00677169	9	0.0091642	9	0.00534147	9	0.00763994	9	0.00792913	9	0.00505849
9.2	0.00754592	9.2	0.00987502	9.2	0.01153207	9.2	0.00801102	9.2	0.00668667	9.2	0.00847135	9.2	0.00889316	9.2	0.00259114	9.2	0.01213471	9.2	0.01614928	9.2	0.00888234	9.2	0.01276146	9.2	0.00866062	9.2	0.01080116	9.2	0.01445301	9.2	0.00487431
9.4	0.00960683	9.4	0.00866495	9.4	0.01045612	9.4	0.00979253	9.4	0.00915406	9.4	0.007076	9.4	0.01272136	9.4	0.00073625	9.4	0.00926494	9.4	0.01805164	9.4	0.0096591	9.4	0.00796023	9.4	0.01229539	9.4	0.00958925	9.4	0.01174955	9.4	0.00318265
9.6	0.00451616	9.6	0.01031679	9.6	0.0123994	9.6	0.01320373	9.6	0.00507265	9.6	0.00802758	9.6	0.00954204	9.6	0.00159121	9.6	0.00624438	9.6	0.01699794	9.6	0.01002623	9.6	0.01150054	9.6	0.01130392	9.6	0.00997862	9.6	0.01187547	9.6	0.00407343
9.8	0.00798911	9.8	0.01398256	9.8	0.01565426	9.8	0.01130071	9.8	0.00232713	9.8	0.01229864	9.8	0.00982381	9.8	0.00244802	9.8	0.00845141	9.8	0.01705414	9.8	0.00685826	9.8	0.01042728	9.8	0.00888231	9.8	0.01274438	9.8	0.01203132	9.8	0.00481689
10	0.00371945	10	0.01082013	10	0.01016959	10	0.00761193	10	0.0055565	10	0.00482624	10	0.01320516	10	0.00134824	10	0.00829459	10	0.01543408	10	0.00910314	10	0.00859846	10	0.01024341	10	0.00851282	10	0.0136124	10	0.01006773
10.2	0.01127357	10.2	0.0113343	10.2	0.0114483	10.2	0.01077527	10.2	0.00974433	10.2	0.00824698	10.2	0.01482869	10.2	0.00386156	10.2	0.00779871	10.2	0.02185021	10.2	0.00542784	10.2	0.01027773	10.2	0.01275549	10.2	0.01235235	10.2	0.01535876	10.2	0.0096526
10.4	0.00655723	10.4	0.01066924	10.4	0.01212122	10.4	0.01178466	10.4	0.00283862	10.4	0.00524988	10.4	0.01087531	10.4	0.00441167	10.4	0.01169918	10.4	0.01885238	10.4	0.00810452	10.4	0.00737676	10.4	0.00731674	10.4	0.00914627	10.4	0.00775826	10.4	0.00659811
10.6	0.00726498	10.6	0.01121947	10.6	0.008744	10.6	0.01060386	10.6	0.00229014	10.6	0.01007352	10.6	0.01242474	10.6	-0.00055379	10.6	0.01020139	10.6	0.01614103	10.6	0.01088277	10.6	0.0140999	10.6	0.01090197	10.6	0.01607733	10.6	0.00891863	10.6	0.01070902
10.8	0.00559859	10.8	0.00913324	10.8	0.00752273	10.8	0.01233269	10.8	0.00306732	10.8	0.00927128	10.8	0.00946716	10.8	0.00140131	10.8	0.01408515	10.8	0.01519311	10.8	0.00692265	10.8	0.01103104	10.8	0.00829541	10.8	0.01293014	10.8	0.00901876	10.8	0.00774399
11	0.00413868	11	0.01545726	11	0.00819743	11	0.01054044	11	0.00519692	11	0.01012806	11	0.01258595	11	0.00474585	11	0.01010834	11	0.01743067	11	0.00501488	11	0.01187144	11	0.0080026	11	0.00950622	11	0.00936555	11	0.00991268
11.2	0.00661936	11.2	0.00804569	11.2	0.00895767	11.2	0.00953029	11.2	0.00524802	11.2	0.01157083	11.2	0.01327715	11.2	0.00305554	11.2	0.01326797	11.2	0.01703578	11.2	0.00958675	11.2	0.01420149	11.2	0.0064268	11.2	0.00984595	11.2	0.01229478	11.2	0.00701223
11.4	0.00670043	11.4	0.00928965	11.4	0.01505404	11.4	0.0138569	11.4	0.00317421	11.4	0.00899932	11.4	0.01021088	11.4	0.00254661	11.4	0.00798432	11.4	0.01978698	11.4	0.00943232	11.4	0.0116251	11.4	0.01030813	11.4	0.0106984	11.4	0.01440266	11.4	0.0079817
11.6	0.00403523	11.6	0.00966569	11.6	0.01336111	11.6	0.01232018	11.6	0.00519212	11.6	0.01096648	11.6	0.01130027	11.6	0.0069403	11.6	0.01333275	11.6	0.01628882	11.6	0.00957783	11.6	0.00846146	11.6	0.00532596	11.6	0.01336015	11.6	0.00960251	11.6	0.00468557
11.8	0.00958896	11.8	0.01120304	11.8	0.01381697	11.8	0.00910606	11.8	0.00468742	11.8	0.01096771	11.8	0.01532244	11.8	0.00399768	11.8	0.01032581	11.8	0.01778184	11.8	0.00721857	11.8	0.01267303	11.8	0.0088052	11.8	0.01118735	11.8	0.01222916	11.8	0.00543138
12	0.00724621	12	0.00820508	12	0.01689107	12	0.01183337	12	0.00830584	12	0.00772827	12	0.01101802	12	0.0034391	12	0.01141388	12	0.01728525	12	0.00581673	12	0.01068858	12	0.0034288	12	0.01036234	12	0.00986854	12	0.00881102
12.2	0.00786269	12.2	0.00735533	12.2	0.00989023	12.2	0.01425793	12.2	0.00473029	12.2	0.01062794	12.2	0.01171132	12.2	0.00475986	12.2	0.01079101	12.2	0.0167366	12.2	0.01068101	12.2	0.01575612	12.2	0.01155024	12.2	0.00893652	12.2	0.01438687	12.2	0.01073565
12.4	0.01058208	12.4	0.01067939	12.4	0.00849694	12.4	0.01708107	12.4	0.00294287	12.4	0.01083122	12.4	0.01201615	12.4	0.00332161	12.4	0.01285663	12.4	0.01848334	12.4	0.01025283	12.4	0.00873216	12.4	0.01118606	12.4	0.01256334	12.4	0.01018069	12.4	0.00795537
12.6	0.00293502	12.6	0.01301522	12.6	0.0156334	12.6	0.01568436	12.6	0.00365521	12.6	0.01198228	12.6	0.01299295	12.6	0.00319798	12.6	0.01548074	12.6	0.01720993	12.6	0.01132211	12.6	0.01303906	12.6	0.01160359	12.6	0.01192734	12.6	0.01171327	12.6	0.01096512
12.8	0.00430889	12.8	0.00804069	12.8	0.01334387	12.8	0.01498657	12.8	0.00221822	12.8	0.00801841	12.8	0.01229236	12.8	0.00168868	12.8	0.0107354	12.8	0.01728047	12.8	0.00983786	12.8	0.01232015	12.8	0.01267679	12.8	0.01270043	12.8	0.01049565	12.8	0.00678126
13	0.0059529	13	0.01672331	13	0.01311652	13	0.00890854	13	0.00711842	13	0.00953102	13	0.0113292	13	0.00525788	13	0.01331528	13	0.02071321	13	0.00913653	13	0.01449928	13	0.01055339	13	0.01269992	13	0.01103675	13	0.00999339
13.2	0.00885033	13.2	0.01114428	13.2	0.00939209	13.2	0.01424206	13.2	0.00395148	13.2	0.00867849	13.2	0.01073983	13.2	0.00197462	13.2	0.01346513	13.2	0.02515116	13.2	0.0070635	13.2	0.01463834	13.2	0.01191294	13.2	0.01197612	13.2	0.01055394	13.2	0.00834588
13.4	0.00502588	13.4	0.01170241	13.4	0.01397654	13.4	0.01555384	13.4	0.00426569	13.4	0.01115773	13.4	0.0106084	13.4	0.00210259	13.4	0.00887158	13.4	0.02457649	13.4	0.00944444	13.4	0.01044138	13.4	0.01152777	13.4	0.01427716	13.4	0.01124873	13.4	0.00915321
13.6	0.00377145	13.6	0.01030634	13.6	0.00936089	13.6	0.01477412	13.6	0.00680172	13.6	0.01136931	13.6	0.01461515	13.6	0.00332729	13.6	0.01011211	13.6	0.01606728	13.6	0.00808986	13.6	0.01220122	13.6	0.01245218	13.6	0.0127947	13.6	0.01098067	13.6	0.00783011
13.8	0.00520438	13.8	0.00759768	13.8	0.01389473	13.8	0.01553745	13.8	0.00436786	13.8	0.01179956	13.8	0.01227138	13.8	0.00520387	13.8	0.01034401	13.8	0.01941844	13.8	0.00868047	13.8	0.01223376	13.8	0.01293088	13.8	0.01021492	13.8	0.01076357	13.8	0.00903595
14	0.0081696	14	0.01540845	14	0.00758096	14	0.0158019	14	0.0045692	14	0.00619057	14	0.01303067	14	0.00417008	14	0.01149157	14	0.0181404	14	0.00576277	14	0.00853627	14	0.01253461	14	0.01357494	14	0.01147643	14	0.01060302
14.2	0.00697442	14.2	0.01261928	14.2	0.01306291	14.2	0.01336789	14.2	0.00632156	14.2	0.01031957	14.2	0.01249272	14.2	0.00422891	14.2	0.01262437	14.2	0.02053175	14.2	0.01155738	14.2	0.01422274	14.2	0.01311285	14.2	0.00980488	14.2	0.01236823	14.2	0.01314381
14.4	0.00644373	14.4	0.01433382	14.4	0.01292938	14.4	0.01495641	14.4	0.0063155	14.4	0.00942428	14.4	0.01294949	14.4	-0.00096343	14.4	0.01124452	14.4	0.02155138	14.4	0.00669575	14.4	0.01331032	14.4	0.00913357	14.4	0.01349858	14.4	0.00990337	14.4	0.01311598
14.6	0.00396525	14.6	0.01461535	14.6	0.01546104	14.6	0.01085422	14.6	0.0055551	14.6	0.01237093	14.6	0.0120726	14.6	-0.00150111	14.6	0.01289428	14.6	0.01399773	14.6	0.01123689	14.6	0.01060832	14.6	0.01562067	14.6	0.01404212	14.6	0.01348038	14.6	0.00907796
14.8	0.00778988	14.8	0.01627964	14.8	0.01333309	14.8	0.01316628	14.8	0.00370935	14.8	0.00833906	14.8	0.01553579	14.8	0.00156979	14.8	0.01619025	14.8	0.02200173	14.8	0.00997532	14.8	0.00985244	14.8	0.01271777	14.8	0.00803379	14.8	0.01529403	14.8	0.01071605
15	0.01056383	15	0.01015054	15	0.01188881	15	0.01757413	15	0.00653561	15	0.00854822	15	0.0127924	15	0.00236291	15	0.007823	15	0.02224206	15	0.00758947	15	0.00894382	15	0.01403927	15	0.01090346	15	0.0157766	15	0.00670407
15.2	0.00814154	15.2	0.01816964	15.2	0.01363577	15.2	0.01483693	15.2	0.00813685	15.2	0.00703331	15.2	0.01236997	15.2	0.00392801	15.2	0.01142382	15.2	0.02161366	15.2	0.00859775	15.2	0.01062589	15.2	0.01102466	15.2	0.01384837	15.2	0.0123157	15.2	0.01015912
15.4	0.00745663	15.4	0.01165952	15.4	0.0143983	15.4	0.01018382	15.4	0.00529257	15.4	0.00913794	15.4	0.01362939	15.4	0.00037905	15.4	0.01789517	15.4	0.02032916	15.4	0.00693478	15.4	0.01143667	15.4	0.01558846	15.4	0.01395373	15.4	0.00775836	15.4	0.00770437
15.6	0.00735825	15.6	0.0127713	15.6	0.01154791	15.6	0.01657315	15.6	0.00245648	15.6	0.01008093	15.6	0.01165173	15.6	0.00100806	15.6	0.0139598	15.6	0.01645495	15.6	0.00912345	15.6	0.01560151	15.6	0.01495946	15.6	0.00872703	15.6	0.00780979	15.6	0.0081453
15.8	0.01329977	15.8	0.01412397	15.8	0.01532635	15.8	0.01340936	15.8	0.00735763	15.8	0.01122155	15.8	0.01564812	15.8	0.00433414	15.8	0.01139786	15.8	0.02166801	15.8	0.01026315	15.8	0.01086299	15.8	0.01284538	15.8	0.01124362	15.8	0.01493042	15.8	0.00805168
16	0.00865439	16	0.01468762	16	0.01331216	16	0.01653502	16	0.00736063	16	0.01239429	16	0.01257895	16	0.00230616	16	0.01114244	16	0.01943706	16	0.01070551	16	0.01504482	16	0.01113724	16	0.01143951	16	0.01436915	16	0.00978545
16.2	0.00571525	16.2	0.00736243	16.2	0.01042644	16.2	0.01995278	16.2	0.00716181	16.2	0.01020145	16.2	0.01838994	16.2	0.00215126	16.2	0.01753371	16.2	0.01790938	16.2	0.00974234	16.2	0.01052245	16.2	0.00491022	16.2	0.01119095	16.2	0.01131836	16.2	0.00716971
16.4	0.00753173	16.4	0.01293339	16.4	0.01593968	16.4	0.01378345	16.4	0.01059724	16.4	0.01044181	16.4	0.01523655	16.4	0.00616044	16.4	0.01106589	16.4	0.01969798	16.4	0.00720385	16.4	0.013284	16.4	0.01154689	16.4	0.01027919	16.4	0.00807221	16.4	0.01014695
16.6	0.00594206	16.6	0.01252923	16.6	0.01536685	16.6	0.01843303	16.6	0.00480321	16.6	0.0109406	16.6	0.0088053	16.6	0.00368097	16.6	0.01617682	16.6	0.01928039	16.6	0.00932402	16.6	0.01443596	16.6	0.01744876	16.6	0.01475005	16.6	0.01452949	16.6	0.01343546
16.8	0.00587713	16.8	0.01380473	16.8	0.01300985	16.8	0.01298607	16.8	0.00672075	16.8	0.01093836	16.8	0.0165881	16.8	0.0057026	16.8	0.01257745	16.8	0.02144194	16.8	0.01154832	16.8	0.01402777	16.8	0.00929812	16.8	0.01132155	16.8	0.01706244	16.8	0.01101505
17	0.00282587	17	0.01466324	17	0.01815658	17	0.01375381	17	0.00678199	17	0.01235211	17	0.01274545	17	0.00541645	17	0.01514687	17	0.01917868	17	0.01245298	17	0.01369009	17	0.01575605	17	0.01644991	17	0.01544028	17	0.01223517
17.2	0.00964001	17.2	0.01132543	17.2	0.01209246	17.2	0.01549929	17.2	0.00948022	17.2	0.01086164	17.2	0.01601907	17.2	0.00265887	17.21	0.01379218	17.21	0.02371834	17.21	0.00982782	17.21	0.01543039	17.21	0.0140753	17.21	0.01213831	17.21	0.01162425	17.21	0.00794621
17.4	0.01117761	17.4	0.01590202	17.4	0.01293508	17.4	0.01782535	17.4	0.00557557	17.4	0.01024241	17.4	0.01694787	17.4	0.00405703	17.4	0.01554733	17.4	0.02001636	17.4	0.01006693	17.4	0.01259211	17.4	0.01236399	17.4	0.01357917	17.4	0.01320212	17.4	0.0066819
17.6	0.01163391	17.6	0.0119573	17.6	0.01526184	17.6	0.01828754	17.6	0.00445037	17.6	0.0096601	17.6	0.01646154	17.6	0.00251128	17.6	0.0123818	17.6	0.02196612	17.6	0.01148089	17.6	0.01570439	17.6	0.01033421	17.6	0.0145066	17.6	0.01279093	17.6	0.00989317
17.8	0.00857158	17.8	0.01310535	17.8	0.0143308	17.8	0.01645982	17.8	0.00891281	17.8	0.0087445	17.8	0.01238635	17.8	0.00103737	17.8	0.01345549	17.8	0.02103638	17.8	0.01039863	17.8	0.0110111	17.8	0.01230054	17.8	0.01235637	17.8	0.0160734	17.8	0.00982674
18	0.00670663	18	0.01902302	18	0.01536393	18	0.01307057	18	0.00939132	18	0.01106165	18	0.01184869	18	0.00093066	18	0.01229985	18	0.01958232	18	0.01195907	18	0.0162658	18	0.01033283	18	0.01301262	18	0.01298324	18	0.00979603
18.2	0.00858985	18.2	0.01672573	18.2	0.01338985	18.2	0.01100861	18.2	0.00901639	18.2	0.01187081	18.2	0.01393488	18.2	0.00169606	18.2	0.01127559	18.2	0.01620188	18.2	0.00719646	18.2	0.01651061	18.2	0.01252278	18.2	0.01481059	18.2	0.00933999	18.2	0.01010354
18.4	0.00838289	18.4	0.01582272	18.4	0.00983579	18.4	0.01394178	18.4	0.00999569	18.4	0.01032959	18.4	0.01804099	18.4	0.00469656	18.4	0.01164372	18.4	0.01804933	18.4	0.00986622	18.4	0.01516178	18.4	0.01495414	18.4	0.01349289	18.4	0.01658505	18.4	0.00865978
18.6	0.00659881	18.6	0.01489809	18.6	0.0159109	18.6	0.01298627	18.6	0.00582502	18.6	0.01099759	18.6	0.01662731	18.6	-0.00275353	18.6	0.01571347	18.6	0.02251898	18.6	0.00888206	18.6	0.01944059	18.6	0.01676468	18.6	0.01211251	18.6	0.01570036	18.6	0.0132283
18.8	0.01039387	18.8	0.01164325	18.8	0.01210681	18.8	0.01561858	18.8	0.00673973	18.8	0.01301589	18.8	0.01769202	18.8	0.00263133	18.8	0.01434186	18.8	0.01974271	18.8	0.01179612	18.8	0.0147294	18.8	0.01015766	18.8	0.01236968	18.8	0.01413698	18.8	0.00676929
19	0.006553	19	0.01226476	19	0.0156423	19	0.01699725	19	0.00561774	19	0.01399761	19	0.01515059	19	0.00564859	19	0.010954	19	0.02027342	19	0.00774168	19	0.01318849	19	0.01393759	19	0.00889127	19	0.01635641	19	0.0070899
19.2	0.00960185	19.2	0.01421511	19.2	0.01624	19.2	0.01959678	19.2	0.00687216	19.2	0.00758241	19.2	0.01471935	19.2	0.0052868	19.2	0.0128189	19.2	0.01996196	19.2	0.0093597	19.2	0.02051048	19.2	0.00921081	19.2	0.01572083	19.2	0.01211394	19.2	0.00682222
19.4	0.00277137	19.4	0.0179111	19.4	0.01308672	19.4	0.01842026	19.4	0.00561578	19.4	0.01256371	19.4	0.01655099	19.4	0.0034685	19.4	0.01112774	19.4	0.02235467	19.4	0.01265386	19.4	0.0161569	19.4	0.01434687	19.4	0.01263411	19.4	0.01691649	19.4	0.01072368
19.6	0.00386063	19.6	0.01089957	19.6	0.01709608	19.6	0.01557298	19.6	0.00741242	19.6	0.00898284	19.6	0.01588819	19.6	0.00555047	19.6	0.01109686	19.6	0.02122495	19.6	0.01108026	19.6	0.01569043	19.6	0.01605434	19.6	0.01166568	19.6	0.00871412	19.6	0.00839305
19.8	0.00627724	19.8	0.01422553	19.8	0.01734015	19.8	0.01804723	19.8	0.00522291	19.8	0.01474047	19.8	0.01394574	19.8	0.00695752	19.8	0.01430937	19.8	0.01778852	19.8	0.01225329	19.8	0.01765803	19.8	0.01316563	19.8	0.0111251	19.8	0.00931614	19.8	0.00739998
20	0.00481749	20	0.01422316	20	0.01633755	20	0.01166803	20	0.00584998	20	0.01138798	20	0.01486913	20	0.0016298	20	0.01351842	20	0.02018119	20	0.01626768	20	0.00894991	20	0.01226033	20	0.01168503	20	0.01997503	20	0.01135786
20.2	0.00659903	20.2	0.01675925	20.2	0.0146026	20.2	0.02157682	20.2	0.00664	20.2	0.01317984	20.2	0.01747935	20.2	0.00127266	20.2	0.01272188	20.2	0.01583734	20.2	0.00830581	20.2	0.0102556	20.2	0.01165044	20.2	0.01291988	20.2	0.01504895	20.2	0.01315446
20.4	0.01050962	20.4	0.01329968	20.4	0.01404931	20.4	0.01688033	20.4	0.01334913	20.4	0.00892807	20.4	0.01443958	20.4	0.00252108	20.4	0.01648619	20.4	0.02312113	20.4	0.00809563	20.4	0.01205269	20.4	0.01013083	20.4	0.01181263	20.4	0.01562012	20.4	0.01287276
20.6	0.00458903	20.6	0.01616079	20.6	0.01433951	20.6	0.01296308	20.6	0.00570492	20.6	0.0093571	20.6	0.01535816	20.6	0.00345146	20.6	0.01421454	20.6	0.02452449	20.6	0.00960564	20.6	0.01318788	20.6	0.013182	20.6	0.01390578	20.6	0.01419487	20.6	0.01059062
20.8	0.00563673	20.8	0.01516209	20.8	0.01693752	20.8	0.01825966	20.8	0.00774167	20.8	0.01033438	20.8	0.02004857	20.8	0.00750142	20.8	0.01478408	20.8	0.01797624	20.8	0.00987534	20.8	0.01207689	20.8	0.01358078	20.8	0.01505391	20.8	0.01073542	20.8	0.00980361
21	0.00735838	21	0.01463672	21	0.01673115	21	0.01733705	21	0.00267784	21	0.01054254	21	0.01872548	21	-0.00060434	21	0.01514098	21	0.02228431	21	0.00963114	21	0.01597424	21	0.01042259	21	0.01642929	21	0.01443046	21	0.0107535
21.2	0.00568647	21.2	0.01422963	21.2	0.01558144	21.2	0.01422416	21.2	0.00515367	21.2	0.01333626	21.2	0.01608985	21.2	0.00898339	21.2	0.01582728	21.2	0.02176198	21.2	0.01055116	21.2	0.0145065	21.2	0.01010461	21.2	0.01146373	21.2	0.01160394	21.2	0.01389444
21.4	0.00979853	21.4	0.01842829	21.4	0.01636226	21.4	0.01896334	21.4	0.00657537	21.4	0.01610527	21.4	0.01418906	21.4	0.00148101	21.4	0.01409165	21.4	0.02154572	21.4	0.01435907	21.4	0.01041425	21.4	0.01227731	21.4	0.0111025	21.4	0.01776728	21.4	0.01160989
21.6	0.00894139	21.6	0.0141607	21.6	0.01617206	21.6	0.01515268	21.6	0.00718159	21.6	0.01154947	21.6	0.01759882	21.6	0.00254856	21.6	0.01310796	21.6	0.02046234	21.6	0.00685198	21.6	0.01139167	21.6	0.01548758	21.6	0.01410473	21.6	0.01185057	21.6	0.01667322
21.8	0.01200069	21.8	0.01483426	21.8	0.01819189	21.8	0.01930359	21.8	0.00939863	21.8	0.01611776	21.8	0.01624255	21.8	0.0052144	21.8	0.01808225	21.8	0.0215967	21.8	0.01058781	21.8	0.01042015	21.8	0.0126776	21.8	0.0102605	21.8	0.01635335	21.8	0.00979304
22	0.00543335	22	0.01186703	22	0.01620578	22	0.02014599	22	0.00661023	22	0.012023	22	0.01572235	22	0.00693505	22	0.01091628	22	0.01775051	22	0.00874138	22	0.01758614	22	0.01022862	22	0.01584145	22	0.01338924	22	0.0113685
22.2	0.01012108	22.2	0.01606733	22.2	0.01270484	22.2	0.02127152	22.2	0.00420946	22.2	0.01022863	22.2	0.01462451	22.2	0.00660168	22.2	0.0171269	22.2	0.02137809	22.2	0.01601261	22.2	0.01797612	22.2	0.01792789	22.2	0.01605498	22.2	0.01535086	22.2	0.0108129
22.4	0.01167034	22.4	0.01917408	22.4	0.01520426	22.4	0.01654926	22.4	0.00838039	22.4	0.01128962	22.4	0.01805504	22.4	0.00515746	22.4	0.01223132	22.4	0.02134423	22.4	0.01384487	22.4	0.01492275	22.4	0.01204275	22.4	0.01569601	22.4	0.01269158	22.4	0.01110072
22.6	0.00812536	22.6	0.0150325	22.6	0.01548882	22.6	0.019955	22.6	0.00717037	22.6	0.0095858	22.6	0.01328967	22.6	0.00039988	22.6	0.01653494	22.6	0.01882677	22.6	0.00863115	22.6	0.01619335	22.6	0.01485919	22.6	0.01150373	22.6	0.01876041	22.6	0.01102168
22.8	0.00752087	22.8	0.01222119	22.8	0.01789782	22.8	0.01901475	22.8	0.00597497	22.8	0.01354197	22.8	0.01728554	22.8	0.00156608	22.8	0.0106986	22.8	0.02207425	22.8	0.01234599	22.8	0.01512705	22.8	0.01256612	22.8	0.01378647	22.8	0.01354032	22.8	0.01076809
23	0.00156306	23	0.01763965	23	0.01377169	23	0.02123351	23	0.00725322	23	0.01051281	23	0.01731806	23	0.00567332	23	0.01800349	23	0.02115982	23	0.00990447	23	0.01199786	23	0.01157416	23	0.01221729	23	0.01472698	23	0.01124682
23.2	0.0056972	23.2	0.01438954	23.2	0.01488204	23.2	0.01840576	23.2	0.00648915	23.2	0.01387915	23.2	0.0150094	23.2	0.00550881	23.2	0.01422045	23.2	0.02179773	23.2	0.00860399	23.2	0.01524319	23.2	0.01584575	23.2	0.01507703	23.2	0.01626981	23.2	0.01052321
23.4	0.00273436	23.4	0.0104465	23.4	0.01327212	23.4	0.01915836	23.4	0.00704078	23.4	0.01154252	23.4	0.01629082	23.4	0.00576903	23.4	0.01398682	23.4	0.0210901	23.4	0.0110754	23.4	0.01876768	23.4	0.01441827	23.4	0.01447614	23.4	0.01239649	23.4	0.00790246
23.6	0.00655236	23.6	0.01433713	23.6	0.01464538	23.6	0.01697853	23.6	0.00876986	23.6	0.01012005	23.6	0.02074792	23.6	0.00478053	23.6	0.01350716	23.6	0.02133198	23.6	0.0109578	23.6	0.01287399	23.6	0.00981285	23.6	0.01402272	23.6	0.01093117	23.6	0.00699185
23.8	0.0071741	23.8	0.00981826	23.8	0.01394599	23.8	0.01929835	23.8	0.00656302	23.8	0.01229598	23.8	0.01782107	23.8	0.00659066	23.8	0.01424333	23.8	0.02272738	23.8	0.01194159	23.8	0.0117737	23.8	0.0140194	23.8	0.01804869	23.8	0.01457	23.8	0.00811319
24	0.00678633	24	0.01517746	24	0.00898129	24	0.01990685	24	0.00897808	24	0.01361855	24	0.01691427	24	0.00535341	24	0.01100114	24	0.01940736	24	0.00998915	24	0.01146701	24	0.01625178	24	0.01470899	24	0.01564533	24	0.01285696
24.2	0.00729776	24.2	0.01421375	24.2	0.01417843	24.2	0.02169826	24.2	0.00816512	24.2	0.01174762	24.2	0.02037373	24.2	0.00498949	24.2	0.01440275	24.2	0.02748519	24.2	0.01252686	24.2	0.01274256	24.2	0.01447997	24.2	0.01668881	24.2	0.01123105	24.2	0.01128639
24.4	0.00784042	24.4	0.0158419	24.4	0.01561268	24.4	0.01768819	24.4	0.00766037	24.4	0.01096241	24.4	0.01492179	24.4	0.00325359	24.4	0.01308379	24.4	0.01824797	24.4	0.0111868	24.4	0.01248264	24.4	0.01243617	24.4	0.01537636	24.4	0.01487596	24.4	0.00984804
24.6	0.00828743	24.6	0.01674171	24.6	0.01668984	24.6	0.01858365	24.6	0.00685774	24.6	0.01317915	24.6	0.0153212	24.6	0.00499295	24.6	0.01242639	24.6	0.02446391	24.6	0.00872879	24.6	0.01398001	24.6	0.0164618	24.6	0.01151323	24.6	0.01381673	24.6	0.01328062
24.8	0.00666192	24.8	0.01187609	24.8	0.0130893	24.8	0.01883461	24.8	0.00645419	24.8	0.01069826	24.8	0.01468781	24.8	0.0020193	24.8	0.01986762	24.8	0.02233382	24.8	0.01592459	24.8	0.0188628	24.8	0.01226874	24.8	0.01382617	24.8	0.01454372	24.8	0.00953852
25	0.00926223	25	0.01320245	25	0.0127354	25	0.01589816	25	0.00126277	25	0.01282198	25	0.01837223	25	0.00550217	25	0.01404237	25	0.02506954	25	0.01191555	25	0.01687998	25	0.01462512	25	0.0151791	25	0.01342502	25	0.01103043
25.2	0.0076328	25.2	0.01404175	25.2	0.01393069	25.2	0.02455717	25.2	0.01059084	25.2	0.01022459	25.2	0.01501527	25.2	0.00747839	25.2	0.01133919	25.2	0.02363573	25.2	0.01000627	25.2	0.0120663	25.2	0.01372966	25.2	0.01573967	25.2	0.01315065	25.2	0.01006158
25.4	0.00813131	25.4	0.01796323	25.4	0.01405387	25.4	0.01623589	25.4	0.00792289	25.4	0.01055357	25.4	0.0211859	25.4	0.00513851	25.4	0.01362733	25.4	0.0234762	25.4	0.0145726	25.4	0.01594376	25.4	0.01585824	25.4	0.01266977	25.4	0.01220646	25.4	0.00456498
25.6	0.00904129	25.6	0.01503165	25.6	0.01805597	25.6	0.02074475	25.6	0.00937437	25.6	0.0143262	25.6	0.01631792	25.6	0.00369961	25.6	0.01399207	25.6	0.02437898	25.6	0.00985986	25.6	0.01359229	25.6	0.00896662	25.6	0.01607168	25.6	0.01430512	25.6	0.00713756
25.8	0.00723456	25.8	0.01871599	25.8	0.01454448	25.8	0.02178258	25.8	0.00853381	25.8	0.01455151	25.8	0.0180437	25.8	0.00483113	25.8	0.01375347	25.8	0.02801403	25.8	0.01267131	25.8	0.0148196	25.8	0.01368219	25.8	0.01431557	25.8	0.01538202	25.8	0.00925925
26	0.00525561	26	0.01726722	26	0.01784697	26	0.02330826	26	0.00852375	26	0.00947695	26	0.02081412	26	0.00599658	26	0.01462978	26	0.02266504	26	0.00786461	26	0.01177694	26	0.01505538	26	0.01531306	26	0.01415461	26	0.01377178
26.2	0.00934087	26.2	0.01656139	26.2	0.01699464	26.2	0.02351849	26.2	0.00408529	26.2	0.01263912	26.2	0.02028118	26.2	0.00616087	26.2	0.0152682	26.2	0.02540048	26.2	0.01068756	26.2	0.0139442	26.2	0.01584083	26.2	0.0183505	26.2	0.01314367	26.2	0.0123658
26.4	0.00722242	26.4	0.01677509	26.4	0.01550904	26.4	0.02106974	26.4	0.00519952	26.4	0.01139459	26.4	0.01940812	26.4	0.0034937	26.4	0.01657164	26.4	0.02628628	26.4	0.01047237	26.4	0.01148989	26.4	0.01360518	26.4	0.01674644	26.4	0.01287116	26.4	0.00802498
26.6	0.00985498	26.6	0.01858325	26.6	0.01494561	26.6	0.01846625	26.6	0.0092203	26.6	0.01144333	26.6	0.02195368	26.6	0.01081325	26.6	0.01436292	26.6	0.02099046	26.6	0.01434718	26.6	0.01490605	26.6	0.00859811	26.6	0.01373836	26.6	0.01478664	26.6	0.00794413
26.8	0.01351175	26.8	0.01421043	26.8	0.01542221	26.8	0.0255807	26.8	0.00631589	26.8	0.01391708	26.8	0.02276847	26.8	0.0073173	26.8	0.01416362	26.8	0.02124554	26.8	0.01006491	26.8	0.01631439	26.8	0.01423131	26.8	0.01406631	26.8	0.01529658	26.8	0.00720027
27	0.01199535	27	0.0169719	27	0.01397965	27	0.02156258	27	0.00886147	27	0.01080389	27	0.02577174	27	0.00413154	27	0.01667754	27	0.01929111	27	0.01228913	27	0.01079528	27	0.01184089	27	0.01464622	27	0.01448864	27	0.0110429
27.2	0.00924393	27.2	0.01924716	27.2	0.01400235	27.2	0.01862897	27.2	0.00846464	27.2	0.00863031	27.2	0.01545507	27.2	0.00154345	27.2	0.0134327	27.2	0.02079002	27.2	0.01080524	27.2	0.01365035	27.2	0.01655285	27.2	0.01581676	27.2	0.01205573	27.2	0.0068662
27.4	0.00803196	27.4	0.0188912	27.4	0.01442181	27.4	0.02289165	27.4	0.00781737	27.4	0.01111231	27.4	0.01548001	27.4	0.00629093	27.4	0.01079679	27.4	0.02147567	27.4	0.01403761	27.4	0.01623478	27.4	0.0163279	27.4	0.01073063	27.4	0.01633524	27.4	0.01189745
27.6	0.00772857	27.6	0.02146417	27.6	0.01536586	27.6	0.01755789	27.6	0.00590227	27.6	0.01377521	27.6	0.01551904	27.6	0.00630143	27.6	0.01558476	27.6	0.02181653	27.6	0.00962144	27.6	0.0171677	27.6	0.01178854	27.6	0.01077316	27.6	0.01279984	27.6	0.01234013
27.8	0.00595926	27.8	0.01963849	27.8	0.01617701	27.8	0.02234738	27.8	0.00688976	27.8	0.01067068	27.8	0.01856192	27.8	0.00230607	27.8	0.01862063	27.8	0.02482847	27.8	0.01518872	27.8	0.01477347	27.8	0.01434616	27.8	0.02208072	27.8	0.01435913	27.8	0.01212056
28	0.01020588	28	0.02115766	28	0.01842512	28	0.0213356	28	0.00337672	28	0.01247529	28	0.01917857	28	0.00472976	28	0.01596138	28	0.02198149	28	0.01055312	28	0.01775801	28	0.01063229	28	0.01746504	28	0.01672285	28	0.0063373
28.2	0.00976736	28.2	0.01922683	28.2	0.01479597	28.2	0.01987745	28.2	0.00757388	28.2	0.00949183	28.2	0.01380798	28.2	0.00361392	28.2	0.01680312	28.2	0.02599788	28.2	0.00900745	28.2	0.0182555	28.2	0.01129937	28.2	0.01242336	28.2	0.01449917	28.2	0.01199724
28.4	0.00555168	28.4	0.01589572	28.4	0.01421787	28.4	0.01898553	28.4	0.00492193	28.4	0.01570636	28.4	0.01446513	28.4	0.00631778	28.4	0.01158576	28.4	0.02044195	28.4	0.01123207	28.4	0.01813261	28.4	0.01652825	28.4	0.01071346	28.4	0.01721537	28.4	0.00963165
28.6	0.00588257	28.6	0.01377072	28.6	0.01580689	28.6	0.02474716	28.6	0.00682475	28.6	0.0121	28.6	0.02087297	28.6	0.00690312	28.6	0.01701526	28.6	0.02139795	28.6	0.01205807	28.6	0.0152886	28.6	0.01352219	28.6	0.01782312	28.6	0.01798811	28.6	0.01065585
28.8	0.00661209	28.8	0.01632043	28.8	0.01389265	28.8	0.02191495	28.8	0.0093709	28.8	0.01132867	28.8	0.01397751	28.8	0.00313172	28.8	0.01578511	28.8	0.02298864	28.8	0.00949534	28.8	0.01487185	28.8	0.01183726	28.8	0.01155218	28.8	0.0163398	28.8	0.01226
29	0.00748211	29	0.01166271	29	0.01622796	29	0.02298341	29	0.00312096	29	0.01146031	29	0.02124587	29	0.00805109	29	0.01324763	29	0.02176472	29	0.00614198	29	0.0161082	29	0.01765811	29	0.01161509	29	0.01426264	29	0.01230541
29.2	0.00911626	29.2	0.01692152	29.2	0.01832338	29.2	0.02030833	29.2	0.00609176	29.2	0.01163854	29.2	0.01731412	29.2	0.00700362	29.2	0.01200095	29.2	0.01824574	29.2	0.00951414	29.2	0.01719656	29.2	0.00931818	29.2	0.01323027	29.2	0.01693311	29.2	0.00767441
29.4	0.00683338	29.4	0.02086891	29.4	0.01539944	29.4	0.02400485	29.4	0.00455479	29.4	0.01133861	29.4	0.01973341	29.4	0.00726035	29.4	0.01677727	29.4	0.02240277	29.4	0.00948987	29.4	0.01252088	29.4	0.01361332	29.4	0.01388345	29.4	0.01832899	29.4	0.0133773
29.6	0.00933245	29.6	0.01638834	29.6	0.01964849	29.6	0.02228036	29.6	0.00626206	29.6	0.01218038	29.6	0.02277766	29.6	0.00594045	29.6	0.01379088	29.6	0.02109226	29.6	0.01073884	29.6	0.01573014	29.6	0.01834916	29.6	0.0123384	29.6	0.01553001	29.6	0.01162842
29.8	0.01227083	29.8	0.01495729	29.8	0.01608457	29.8	0.02391674	29.8	0.00655522	29.8	0.01480625	29.8	0.02264255	29.8	0.00769994	29.8	0.01131958	29.8	0.02218073	29.8	0.01021508	29.8	0.01601605	29.8	0.01712533	29.8	0.01640275	29.8	0.01457558	29.8	0.01531134
30	0.00749593	30	0.01901561	30	0.01639057	30	0.02300299	30	0.01064709	30	0.01220613	30	0.02012021	30	0.00694595	30	0.01508365	30	0.02086603	30	0.01217298	30	0.01812385	30	0.01793092	30	0.01233421	30	0.01550823	30	0.00920101
30.2	0.00855229	30.2	0.01915958	30.2	0.0168304	30.2	0.02229548	30.2	0.00997011	30.2	0.01481941	30.2	0.01866652	30.2	0.00678318	30.2	0.00991006	30.2	0.02106874	30.2	0.01016897	30.2	0.01775581	30.2	0.01530522	30.2	0.02051137	30.2	0.01016699	30.2	0.01171034
30.4	0.00667678	30.4	0.01692223	30.4	0.0182268	30.4	0.02333306	30.4	0.00533611	30.4	0.01389314	30.4	0.01613284	30.4	0.00589587	30.4	0.01603727	30.4	0.02220283	30.4	0.01475209	30.4	0.0137229	30.4	0.01990548	30.4	0.01361517	30.4	0.01496752	30.4	0.0135729
30.6	0.01067183	30.6	0.01597734	30.6	0.01780393	30.6	0.02489116	30.6	0.00604912	30.6	0.01581932	30.6	0.01800199	30.6	0.0064603	30.6	0.01716013	30.6	0.02507959	30.6	0.01285405	30.6	0.01483797	30.6	0.01544168	30.6	0.01511785	30.6	0.01725559	30.6	0.01118019
30.8	0.00769969	30.8	0.01674771	30.8	0.02012711	30.8	0.02042725	30.8	0.00486928	30.8	0.01232318	30.8	0.01536051	30.8	0.00369818	30.8	0.01977076	30.8	0.0230937	30.8	0.01234534	30.8	0.01392127	30.8	0.01213018	30.8	0.01513464	30.8	0.01726337	30.8	0.01032749
31	0.00964677	31	0.01709443	31	0.01460997	31	0.02306743	31	0.00938307	31	0.01137864	31	0.01964927	31	0.00319319	31	0.01653025	31	0.02374861	31	0.01350458	31	0.01523002	31	0.01800149	31	0.01558747	31	0.01175201	31	0.01348981
31.2	0.00549877	31.2	0.01668748	31.2	0.01607452	31.2	0.02024864	31.2	0.00666604	31.2	0.01362211	31.2	0.02190204	31.2	0.00423376	31.2	0.01492585	31.2	0.02091295	31.2	0.00967034	31.2	0.01852573	31.2	0.02014158	31.2	0.01330162	31.2	0.02005727	31.2	0.00931618
31.4	0.00971885	31.4	0.01548	31.4	0.01145449	31.4	0.02456258	31.4	0.00986435	31.4	0.01405666	31.4	0.01961286	31.4	0.0095272	31.4	0.0162636	31.4	0.01933958	31.4	0.01033551	31.4	0.01810277	31.4	0.01573616	31.4	0.01601624	31.4	0.01528447	31.4	0.01047654
31.6	0.0082418	31.6	0.01664556	31.6	0.0142698	31.6	0.01885838	31.6	0.00647642	31.6	0.01436473	31.6	0.02180846	31.6	0.00590116	31.6	0.01497429	31.6	0.02182508	31.6	0.00968591	31.6	0.01642158	31.6	0.01345746	31.6	0.01753998	31.6	0.01799347	31.6	0.01194649
31.8	0.00628549	31.8	0.01604299	31.8	0.01655625	31.8	0.02342689	31.8	0.00687457	31.8	0.01733009	31.8	0.02256569	31.8	0.00823991	31.8	0.0122528	31.8	0.02156853	31.8	0.01367858	31.8	0.01526998	31.8	0.01622958	31.8	0.01524499	31.8	0.01639975	31.8	0.01378288
32	0.00558014	32	0.01890663	32	0.0198926	32	0.02303187	32	0.00892394	32	0.01616661	32	0.02616424	32	0.0071277	32	0.01791521	32	0.02127943	32	0.01293216	32	0.01721506	32	0.01835042	32	0.01434554	32	0.01474333	32	0.00998714
32.2	0.00979574	32.2	0.01973263	32.2	0.01739669	32.2	0.02238419	32.2	0.01060433	32.2	0.01494777	32.2	0.0125995	32.2	0.0082118	32.2	0.0142105	32.2	0.02140556	32.2	0.01137847	32.2	0.01652535	32.2	0.01758503	32.2	0.01485243	32.2	0.01581941	32.2	0.01025234
32.4	0.0037512	32.4	0.01511516	32.4	0.01232469	32.4	0.02097697	32.4	0.00432335	32.4	0.01453281	32.4	0.01969652	32.4	0.00317751	32.4	0.01424822	32.4	0.02015477	32.4	0.01060208	32.4	0.01932216	32.4	0.01504892	32.4	0.01834315	32.4	0.01619346	32.4	0.01235239
32.6	0.01074851	32.6	0.01885267	32.6	0.01524728	32.6	0.02774283	32.6	0.00535256	32.6	0.01633739	32.6	0.01792345	32.6	0.00751258	32.6	0.01538989	32.6	0.01624072	32.6	0.01017162	32.6	0.01481583	32.6	0.0167704	32.6	0.01300249	32.6	0.01327718	32.6	0.01601816
32.8	0.00616708	32.8	0.0153638	32.8	0.01298317	32.8	0.01985865	32.8	0.0107186	32.8	0.01380447	32.8	0.019121	32.8	0.00180592	32.8	0.01493251	32.8	0.02208924	32.8	0.0141378	32.8	0.0182019	32.8	0.01502658	32.8	0.01926659	32.8	0.01733768	32.8	0.00632021
33	0.00945444	33	0.01916814	33	0.02059986	33	0.02199816	33	0.00894767	33	0.01731168	33	0.02563902	33	0.00767798	33	0.01852214	33	0.01982714	33	0.01108901	33	0.01397766	33	0.01916974	33	0.01513803	33	0.01624045	33	0.01556662
33.2	0.00876861	33.2	0.01944394	33.2	0.01914017	33.2	0.02245169	33.2	0.00792347	33.2	0.01733945	33.2	0.0244071	33.2	0.00710717	33.2	0.01446124	33.2	0.02209802	33.2	0.01436312	33.2	0.01902773	33.2	0.01584097	33.2	0.01491796	33.2	0.01523719	33.2	0.01483609
33.4	0.00959838	33.4	0.01588553	33.4	0.0176382	33.4	0.02273929	33.4	0.00952536	33.4	0.013611	33.4	0.01874465	33.4	0.00581067	33.4	0.01795632	33.4	0.02266739	33.4	0.01300072	33.4	0.0191259	33.4	0.01956362	33.4	0.01300638	33.4	0.01398796	33.4	0.01463124
33.6	0.01223899	33.6	0.01898218	33.6	0.01588144	33.6	0.0264569	33.6	0.01138068	33.6	0.0139597	33.6	0.02087489	33.6	0.01083544	33.6	0.01338558	33.6	0.02103276	33.6	0.012037	33.6	0.01483328	33.6	0.01693004	33.6	0.01251659	33.6	0.01200748	33.6	0.01696442
33.8	0.00819937	33.8	0.0167109	33.8	0.01868133	33.8	0.02720973	33.8	0.00828744	33.8	0.014245	33.8	0.02005909	33.8	0.00495695	33.8	0.01355468	33.8	0.02197477	33.8	0.01235412	33.8	0.01756271	33.8	0.0182604	33.8	0.01591671	33.8	0.01458875	33.8	0.01118194
34	0.01274415	34	0.01670932	34	0.01593602	34	0.02189691	34	0.00993311	34	0.01630405	34	0.02085149	34	0.00890628	34	0.0148801	34	0.01507526	34	0.00862839	34	0.01752858	34	0.01611157	34	0.01874783	34	0.01738162	34	0.01481152
34.2	0.00928562	34.2	0.01638216	34.2	0.01744443	34.2	0.02619317	34.2	0.0073663	34.2	0.01291103	34.2	0.01712009	34.2	0.00589006	34.2	0.01641036	34.2	0.02386218	34.2	0.01109918	34.2	0.01790983	34.2	0.01657353	34.2	0.01587753	34.2	0.01603436	34.2	0.0104187
34.4	0.0073463	34.4	0.01857491	34.4	0.01879561	34.4	0.02625457	34.4	0.00641288	34.4	0.01448519	34.4	0.01684782	34.4	0.00494663	34.4	0.01739749	34.4	0.01780733	34.4	0.01109551	34.4	0.01562522	34.4	0.01929871	34.4	0.01664377	34.4	0.02272422	34.4	0.01763549
34.6	0.00713263	34.6	0.01699558	34.6	0.01651236	34.6	0.02805061	34.6	0.00741155	34.6	0.01935841	34.6	0.02060574	34.6	0.00234879	34.6	0.01414315	34.6	0.02054689	34.6	0.01227251	34.6	0.01720867	34.6	0.01288486	34.6	0.01375261	34.6	0.01768694	34.6	0.0140235
34.8	0.009708	34.8	0.01945153	34.8	0.01650393	34.8	0.02119259	34.8	0.00397692	34.8	0.013236	34.8	0.01658321	34.8	0.00905414	34.8	0.01385928	34.8	0.02065035	34.8	0.01306294	34.8	0.01788979	34.8	0.01828381	34.8	0.01629315	34.8	0.0161899	34.8	0.01250795
35	0.0109512	35	0.01766183	35	0.0193184	35	0.02482689	35	0.01035528	35	0.0136723	35	0.02196328	35	0.00357046	35	0.01851794	35	0.02550295	35	0.00996313	35	0.0194088	35	0.01540917	35	0.01533302	35	0.01336581	35	0.01701497
35.2	0.01096234	35.2	0.01975314	35.2	0.01529224	35.2	0.02355531	35.2	0.01222983	35.2	0.01447781	35.2	0.02539838	35.2	0.0071529	35.2	0.01388907	35.2	0.02275842	35.2	0.01463896	35.2	0.01831347	35.2	0.0153928	35.2	0.01802857	35.2	0.01606667	35.2	0.01269443
35.4	0.00972969	35.4	0.0171843	35.4	0.01682716	35.4	0.01884016	35.4	0.01015938	35.4	0.01721834	35.4	0.021192	35.4	0.00235803	35.4	0.01770515	35.4	0.02425088	35.4	0.01451256	35.4	0.01479327	35.4	0.01787213	35.4	0.01458988	35.4	0.02111657	35.4	0.01230971
35.6	0.00431071	35.6	0.01894831	35.6	0.02017851	35.6	0.02556724	35.6	0.00938888	35.6	0.0114828	35.6	0.02053974	35.6	0.00633067	35.6	0.01690293	35.6	0.02221696	35.6	0.01126534	35.6	0.01686938	35.6	0.01362712	35.6	0.01642103	35.6	0.01549174	35.6	0.01192797
35.8	0.01011156	35.8	0.01766353	35.8	0.01621645	35.8	0.02621895	35.8	0.00920895	35.8	0.01448472	35.8	0.02296774	35.8	0.0109901	35.8	0.01637945	35.8	0.02193296	35.8	0.00831619	35.8	0.01429671	35.8	0.0175888	35.8	0.01841269	35.8	0.01587188	35.8	0.01462041
36	0.01299394	36	0.01742967	36	0.01880461	36	0.02704646	36	0.00784975	36	0.0159677	36	0.02356164	36	0.00468939	36	0.01219751	36	0.02178667	36	0.01403252	36	0.0191955	36	0.01283286	36	0.01485614	36	0.01828547	36	0.01612761
36.2	0.01045982	36.2	0.01612705	36.2	0.0178749	36.2	0.02432797	36.2	0.00455611	36.2	0.0124912	36.2	0.02327296	36.2	0.00747487	36.2	0.0120807	36.2	0.02329502	36.2	0.01314868	36.2	0.01486269	36.2	0.01681297	36.2	0.01356579	36.2	0.01650663	36.2	0.01177466
36.4	0.01108109	36.4	0.02323862	36.4	0.02031823	36.4	0.02374963	36.4	0.01205138	36.4	0.01651935	36.4	0.02346221	36.4	0.00531081	36.4	0.01314728	36.4	0.01922699	36.4	0.0177941	36.4	0.01231128	36.4	0.00930934	36.4	0.01792783	36.4	0.01553898	36.4	0.01546264
36.6	0.00884731	36.6	0.01901031	36.6	0.02255853	36.6	0.02426688	36.6	0.00697844	36.6	0.01493284	36.6	0.02021495	36.6	0.00383307	36.6	0.01689825	36.6	0.02298239	36.6	0.01125831	36.6	0.0202401	36.6	0.01662044	36.6	0.01880417	36.6	0.01642794	36.6	0.01651486
36.8	0.00984732	36.8	0.01802498	36.8	0.01624643	36.8	0.02424583	36.8	0.00829449	36.8	0.01504166	36.8	0.01926293	36.8	0.00204676	36.8	0.01660225	36.8	0.02493592	36.8	0.01456786	36.8	0.01614229	36.8	0.01394367	36.8	0.01310059	36.8	0.0131504	36.8	0.01584238
37	0.0080369	37	0.01598539	37	0.01791565	37	0.02207029	37	0.00699887	37	0.01377825	37	0.02052107	37	0.00846893	37	0.01445098	37	0.02114463	37	0.01782454	37	0.01530182	37	0.017764	37	0.01204669	37	0.01904014	37	0.01335777
37.2	0.0076575	37.2	0.01506633	37.2	0.01756433	37.2	0.02050315	37.2	0.00611318	37.2	0.01358965	37.2	0.02240131	37.2	0.00431863	37.2	0.01762029	37.2	0.02178783	37.2	0.01534945	37.2	0.01579717	37.2	0.01673412	37.2	0.01921494	37.2	0.01625934	37.2	0.01418209
37.4	0.00680379	37.4	0.01788587	37.4	0.01779283	37.4	0.02134671	37.4	0.00731078	37.4	0.01499166	37.4	0.01939165	37.4	0.00760887	37.4	0.01864071	37.4	0.02392925	37.4	0.01191	37.4	0.0168056	37.4	0.01851284	37.4	0.01481195	37.4	0.01509751	37.4	0.01204522
37.6	0.00841747	37.6	0.01905792	37.6	0.01702671	37.6	0.02431872	37.6	0.00869824	37.6	0.01351902	37.6	0.01983445	37.6	0.00928858	37.6	0.01438544	37.6	0.023662	37.6	0.00820854	37.6	0.02125721	37.6	0.01761019	37.6	0.01914571	37.6	0.01625435	37.6	0.01695474
37.8	0.00990743	37.8	0.02269923	37.8	0.01900582	37.8	0.02627493	37.8	0.01034719	37.8	0.0153363	37.8	0.02136029	37.8	0.01433739	37.8	0.01828487	37.8	0.02221662	37.8	0.01677279	37.8	0.01939686	37.8	0.01512704	37.8	0.01757148	37.8	0.01875915	37.8	0.01202673
38	0.00846617	38	0.01856427	38	0.02039309	38	0.02601501	38	0.00944364	38	0.01470803	38	0.01790362	38	0.00420715	38.01	0.01731139	38.01	0.02248918	38.01	0.01175112	38.01	0.02184585	38.01	0.0154904	38.01	0.01882495	38.01	0.01774275	38.01	0.0151985
38.2	0.00990308	38.2	0.01783093	38.2	0.0183771	38.2	0.02613045	38.2	0.01203957	38.2	0.01418968	38.2	0.02184909	38.2	0.00832476	38.2	0.01588488	38.2	0.02575533	38.2	0.01607663	38.2	0.01834703	38.2	0.01336921	38.2	0.01608893	38.2	0.01927727	38.2	0.01269025
38.4	0.00818886	38.4	0.02076148	38.4	0.02087804	38.4	0.02272997	38.4	0.00788952	38.4	0.01081348	38.4	0.02059369	38.4	0.00871301	38.4	0.02072144	38.4	0.02374317	38.4	0.01501597	38.4	0.01626158	38.4	0.01711653	38.4	0.01690068	38.4	0.01584489	38.4	0.01453408
38.6	0.01125219	38.6	0.01943853	38.6	0.01782109	38.6	0.02906272	38.6	0.0070102	38.6	0.01487827	38.6	0.01688699	38.6	0.00706574	38.6	0.01734747	38.6	0.02251211	38.6	0.01304131	38.6	0.01744034	38.6	0.02002035	38.6	0.01518262	38.6	0.01353967	38.6	0.01505906
38.8	0.00465004	38.8	0.02311836	38.8	0.01584481	38.8	0.02702296	38.8	0.00651047	38.8	0.01902903	38.8	0.01987408	38.8	0.00649794	38.8	0.0151115	38.8	0.02324307	38.8	0.01546135	38.8	0.01290855	38.8	0.01913131	38.8	0.0150489	38.8	0.01733212	38.8	0.01267942
39	0.01298982	39	0.0206048	39	0.01959029	39	0.02531998	39	0.01048455	39	0.01709949	39	0.01618703	39	0.00941849	39	0.01451779	39	0.01859653	39	0.00801499	39	0.01267269	39	0.01702702	39	0.01584396	39	0.01741758	39	0.0144906
39.2	0.00815267	39.2	0.01720029	39.2	0.01710786	39.2	0.02529516	39.2	0.00709057	39.2	0.01449663	39.2	0.01741293	39.2	0.00834562	39.2	0.01512715	39.2	0.02606453	39.2	0.01522592	39.2	0.01859055	39.2	0.0179469	39.2	0.01590375	39.2	0.01768834	39.2	0.01383846
39.4	0.00827292	39.4	0.01971749	39.4	0.02056055	39.4	0.02524714	39.4	0.01443476	39.4	0.0152145	39.4	0.01337186	39.4	0.00819995	39.4	0.01921669	39.4	0.02519265	39.4	0.01269872	39.4	0.01914426	39.4	0.01978092	39.4	0.01930689	39.4	0.01328682	39.4	0.01313254
39.6	0.00941989	39.6	0.01730852	39.6	0.01989864	39.6	0.02755059	39.6	0.00565869	39.6	0.01529953	39.6	0.02158922	39.6	0.00609728	39.6	0.01652338	39.6	0.02312671	39.6	0.01150915	39.6	0.0151809	39.6	0.01947309	39.6	0.01695182	39.6	0.02295111	39.6	0.01349924
39.8	0.0098213	39.8	0.01880211	39.8	0.01766214	39.8	0.02741919	39.8	0.00708885	39.8	0.01505302	39.8	0.02122708	39.8	0.00819378	39.8	0.01669073	39.8	0.0283495	39.8	0.01319477	39.8	0.01755933	39.8	0.01731787	39.8	0.01733599	39.8	0.01807219	39.8	0.01500924
40	0.00634319	40	0.02053986	40	0.01599568	40	0.02858981	40	0.00927958	40	0.01788101	40	0.02529622	40	0.00870223	40	0.01739102	40	0.02021969	40	0.01539761	40	0.01822184	40	0.01927726	40	0.02020751	40	0.01782174	40	0.01248501
40.2	0.01120506	40.2	0.02282161	40.2	0.02038573	40.2	0.02790914	40.2	0.00967423	40.2	0.01673566	40.2	0.01873808	40.2	0.00842857	40.2	0.02337878	40.2	0.02527718	40.2	0.01213379	40.2	0.01581313	40.2	0.01687649	40.2	0.01910061	40.2	0.01605856	40.2	0.0183861
40.4	0.00894389	40.4	0.02061285	40.4	0.01846778	40.4	0.02841254	40.4	0.00811785	40.4	0.01159658	40.4	0.01990224	40.4	0.00477975	40.4	0.01708141	40.4	0.02508571	40.4	0.01308737	40.4	0.01663784	40.4	0.01804411	40.4	0.01948231	40.4	0.0197566	40.4	0.01080753
40.6	0.01132486	40.6	0.02245981	40.6	0.01578101	40.6	0.0262783	40.6	0.00715059	40.6	0.01486241	40.6	0.02425981	40.6	0.00837006	40.6	0.0181257	40.6	0.02479588	40.6	0.01225794	40.6	0.01388955	40.6	0.01713883	40.6	0.01397731	40.6	0.01978811	40.6	0.01740998
40.8	0.00783933	40.8	0.0204047	40.8	0.01534746	40.8	0.02701847	40.8	0.00611415	40.8	0.01726587	40.8	0.02288778	40.8	0.00663951	40.8	0.01812882	40.8	0.0210439	40.8	0.01168708	40.8	0.02110904	40.8	0.01736711	40.8	0.01875859	40.8	0.01988853	40.8	0.01587783
41	0.00794676	41	0.01446141	41	0.01690649	41	0.02658676	41	0.00712119	41	0.01686567	41	0.02074916	41	0.00595123	41	0.01124547	41	0.02351049	41	0.01263653	41	0.01659185	41	0.01808424	41	0.02043704	41	0.01920203	41	0.01560762
41.2	0.00858348	41.2	0.01895371	41.2	0.018139	41.2	0.02995511	41.2	0.01238701	41.2	0.01005218	41.2	0.02302049	41.2	0.005434	41.2	0.01479805	41.2	0.02239967	41.2	0.00894392	41.2	0.02082166	41.2	0.02280459	41.2	0.01693775	41.2	0.01471574	41.2	0.01296233
41.4	0.00691232	41.4	0.01852951	41.4	0.01813762	41.4	0.02386279	41.4	0.0099811	41.4	0.01313918	41.4	0.024006	41.4	0.00761568	41.4	0.01368878	41.4	0.02678851	41.4	0.00971546	41.4	0.02053125	41.4	0.01467222	41.4	0.00935826	41.4	0.02044377	41.4	0.01806674
41.6	0.00659432	41.6	0.01301345	41.6	0.01473986	41.6	0.02441882	41.6	0.00871556	41.6	0.01418908	41.6	0.01847343	41.6	0.00218294	41.6	0.01562471	41.6	0.02591884	41.6	0.01212324	41.6	0.01400033	41.6	0.01796441	41.6	0.01281325	41.6	0.0159855	41.6	0.01601118
41.8	0.01472787	41.8	0.02103867	41.8	0.01856248	41.8	0.02578014	41.8	0.00867782	41.8	0.0170474	41.8	0.02180577	41.8	0.01056989	41.8	0.01909653	41.8	0.02549398	41.8	0.01393581	41.8	0.01486769	41.8	0.01284592	41.8	0.01822761	41.8	0.01634189	41.8	0.01593477
42	0.01393662	42	0.02033599	42	0.02025302	42	0.02692468	42	0.01024576	42	0.01832643	42	0.01996794	42	0.0047044	42	0.01621858	42	0.02335771	42	0.01444965	42	0.01581792	42	0.01797268	42	0.01555359	42	0.01887324	42	0.01642129
42.2	0.00720386	42.2	0.01572089	42.2	0.02044819	42.2	0.02678211	42.2	0.00881549	42.2	0.02184039	42.2	0.02297879	42.2	0.00586784	42.2	0.01757653	42.2	0.02227437	42.2	0.01301547	42.2	0.01310042	42.2	0.01646886	42.2	0.0159867	42.2	0.01674496	42.2	0.01339806
42.4	0.00673133	42.4	0.02467252	42.4	0.02064683	42.4	0.02362806	42.4	0.00516978	42.4	0.01443011	42.4	0.02393589	42.4	0.00094046	42.4	0.01887697	42.4	0.02528627	42.4	0.01205357	42.4	0.02035297	42.4	0.01815099	42.4	0.01820858	42.4	0.01949296	42.4	0.01138906
42.6	0.00902681	42.6	0.02038713	42.6	0.01643466	42.6	0.02919404	42.6	0.00689648	42.6	0.01835166	42.6	0.02062683	42.6	0.00526951	42.6	0.01438755	42.6	0.02580016	42.6	0.01515539	42.6	0.02100638	42.6	0.02113741	42.6	0.01774696	42.6	0.01603017	42.6	0.01214423
42.8	0.01045527	42.8	0.01997901	42.8	0.01655878	42.8	0.02521027	42.8	0.00825037	42.8	0.01410322	42.8	0.01813204	42.8	0.00666458	42.8	0.01586693	42.8	0.02987037	42.8	0.00999927	42.8	0.02041079	42.8	0.01685965	42.8	0.01537199	42.8	0.01959915	42.8	0.01521521
43	0.00941809	43	0.02157681	43	0.01437631	43	0.02813717	43	0.00853072	43	0.01551773	43	0.02190559	43	0.00804032	43	0.01855551	43	0.02410581	43	0.01457867	43	0.02204591	43	0.0153938	43	0.01537715	43	0.01641904	43	0.01410194
43.2	0.01361269	43.2	0.01899938	43.2	0.01882433	43.2	0.02944196	43.2	0.01026099	43.2	0.01581116	43.2	0.0229285	43.2	0.00806809	43.2	0.01848505	43.2	0.02901088	43.2	0.00943025	43.2	0.01817072	43.2	0.01596973	43.2	0.0153038	43.2	0.0203891	43.2	0.00959611
43.4	0.00618561	43.4	0.01938053	43.4	0.01937675	43.4	0.02428458	43.4	0.00665092	43.4	0.01660728	43.4	0.02178198	43.4	0.00813312	43.4	0.01549361	43.4	0.02278808	43.4	0.01602493	43.4	0.01659757	43.4	0.01923081	43.4	0.01565431	43.4	0.01759587	43.4	0.01104196
43.6	0.01276752	43.6	0.02237679	43.6	0.01772825	43.6	0.02671769	43.6	0.00588631	43.6	0.01931246	43.6	0.01861925	43.6	0.00668655	43.6	0.01567819	43.6	0.02684527	43.6	0.0116003	43.6	0.01940014	43.6	0.01724035	43.6	0.01884366	43.6	0.01672419	43.6	0.01259728
43.8	0.00818597	43.8	0.01760088	43.8	0.02039572	43.8	0.02858426	43.8	0.01227199	43.8	0.01410017	43.8	0.02191628	43.8	0.00600373	43.8	0.01882346	43.8	0.02472767	43.8	0.01495946	43.8	0.01710758	43.8	0.01780608	43.8	0.01935927	43.8	0.01622265	43.8	0.01069733
44	0.00801472	44	0.02180693	44	0.01850919	44	0.02805236	44	0.00580601	44	0.01314085	44	0.02043041	44	0.00366006	44	0.01520654	44	0.02501163	44	0.01242606	44	0.01638686	44	0.01856657	44	0.01767426	44	0.01772918	44	0.01386824
44.2	0.00917592	44.2	0.01811131	44.2	0.02217354	44.2	0.02498674	44.2	0.0122232	44.2	0.01252098	44.2	0.02124252	44.2	0.0055132	44.2	0.01865023	44.2	0.02312853	44.2	0.01469464	44.2	0.01619899	44.2	0.02222813	44.2	0.01768583	44.2	0.02166432	44.2	0.01248318
44.4	0.00950733	44.4	0.02262949	44.4	0.0184826	44.4	0.02711217	44.4	0.00938086	44.4	0.01568895	44.4	0.02317201	44.4	0.01091183	44.4	0.01744478	44.4	0.02301569	44.4	0.01481938	44.4	0.02086373	44.4	0.01983678	44.4	0.01525123	44.4	0.02198558	44.4	0.01375208
44.6	0.00549685	44.6	0.01721203	44.6	0.02034121	44.6	0.02706698	44.6	0.00880276	44.6	0.01428192	44.6	0.02174026	44.6	0.00938097	44.6	0.01042966	44.6	0.0226657	44.6	0.01608049	44.6	0.01584896	44.6	0.01933321	44.6	0.01912591	44.6	0.01941093	44.6	0.01372309
44.8	0.00509018	44.8	0.02338012	44.8	0.01439207	44.8	0.02560936	44.8	0.00752831	44.8	0.01453357	44.8	0.01969059	44.8	0.00664518	44.8	0.0135583	44.8	0.02757818	44.8	0.01202864	44.8	0.01842337	44.8	0.02095728	44.8	0.02009449	44.8	0.02067949	44.8	0.01522717
45	0.01113787	45	0.02125895	45	0.0164948	45	0.03128667	45	0.00889911	45	0.0138706	45	0.02064572	45	0.00639847	45	0.0214295	45	0.0214901	45	0.0159247	45	0.01821544	45	0.01640236	45	0.01902561	45	0.01725322	45	0.01542981
45.2	0.00938566	45.2	0.01977864	45.2	0.01874205	45.2	0.03064324	45.2	0.01267998	45.2	0.01940235	45.2	0.02537133	45.2	0.00777263	45.2	0.01420492	45.2	0.02620102	45.2	0.01107726	45.2	0.017615	45.2	0.01764294	45.2	0.01561004	45.2	0.01960464	45.2	0.01335603
45.4	0.00798403	45.4	0.02264549	45.4	0.01609153	45.4	0.02640715	45.4	0.00922023	45.4	0.01197846	45.4	0.0207849	45.4	0.00715771	45.4	0.01997405	45.4	0.02685561	45.4	0.01685486	45.4	0.02200618	45.4	0.0217249	45.4	0.02026715	45.4	0.01730939	45.4	0.00843284
45.6	0.00929123	45.6	0.0191681	45.6	0.02006696	45.6	0.0297365	45.6	0.0082635	45.6	0.01496725	45.6	0.02213881	45.6	0.01083749	45.6	0.02348818	45.6	0.0223581	45.6	0.01567502	45.6	0.0165859	45.6	0.01701139	45.6	0.01867688	45.6	0.01810631	45.6	0.01731204
45.8	0.00829519	45.8	0.01942553	45.8	0.01653774	45.8	0.02572487	45.8	0.00549037	45.8	0.01451982	45.8	0.02162874	45.8	0.00246855	45.8	0.02020128	45.8	0.02252793	45.8	0.01444003	45.8	0.01918543	45.8	0.0177954	45.8	0.01764648	45.8	0.0156894	45.8	0.01690815
46	0.00946205	46	0.02257983	46	0.0155786	46	0.03236595	46	0.01198927	46	0.01456324	46	0.02489208	46	0.00257458	46	0.01774319	46	0.02650884	46	0.0162453	46	0.01712355	46	0.01982345	46	0.01625096	46	0.01798095	46	0.01449604
46.2	0.00777047	46.2	0.01753195	46.2	0.01944626	46.2	0.0253221	46.2	0.009403	46.2	0.01543923	46.2	0.02612994	46.2	0.01063697	46.2	0.01744262	46.2	0.02387785	46.2	0.0095847	46.2	0.01887598	46.2	0.01795759	46.2	0.01715982	46.2	0.01724728	46.2	0.01427861
46.4	0.00883239	46.4	0.0194973	46.4	0.01938245	46.4	0.02821165	46.4	0.00770473	46.4	0.01593203	46.4	0.0211879	46.4	0.00838456	46.4	0.01114972	46.4	0.02717732	46.4	0.01737053	46.4	0.0173003	46.4	0.02303503	46.4	0.01389774	46.4	0.01586124	46.4	0.01586643
46.6	0.01102003	46.6	0.01780905	46.6	0.02056417	46.6	0.02799894	46.6	0.00704449	46.6	0.01686285	46.6	0.02502288	46.6	0.0079154	46.6	0.01725448	46.6	0.02803778	46.6	0.01144509	46.6	0.02108549	46.6	0.02076701	46.6	0.01869995	46.6	0.01652849	46.6	0.01878524
46.8	0.00855617	46.8	0.01662365	46.8	0.01972277	46.8	0.02889026	46.8	0.00992648	46.8	0.0161406	46.8	0.01906204	46.8	0.00310512	46.8	0.01584206	46.8	0.02551188	46.8	0.01299275	46.8	0.01955788	46.8	0.01895132	46.8	0.01471812	46.8	0.02099469	46.8	0.01425004
47	0.01231965	47	0.01953644	47	0.01669415	47	0.03035232	47	0.00883051	47	0.01683415	47	0.02411102	47	0.00777048	47	0.01853514	47	0.02490907	47	0.01452517	47	0.02077581	47	0.02590192	47	0.0175875	47	0.0134237	47	0.01407813
47.2	0.00971844	47.2	0.01744897	47.2	0.01767497	47.2	0.03010342	47.2	0.01083259	47.2	0.01969731	47.2	0.02455966	47.2	0.00331549	47.2	0.01751997	47.2	0.02891915	47.2	0.01408504	47.2	0.02323243	47.2	0.01599506	47.2	0.01888045	47.2	0.01629247	47.2	0.01513146
47.4	0.00654497	47.4	0.0191796	47.4	0.02172874	47.4	0.03123218	47.4	0.01049321	47.4	0.01551285	47.4	0.01840445	47.4	0.0076378	47.4	0.02025042	47.4	0.02554752	47.4	0.01193899	47.4	0.02095916	47.4	0.02346171	47.4	0.02150941	47.4	0.01853113	47.4	0.02095681
47.6	0.01252409	47.6	0.02073033	47.6	0.01557434	47.6	0.02459764	47.6	0.01147139	47.6	0.01912503	47.6	0.023255	47.6	0.00405514	47.63	0.01759723	47.63	0.02766215	47.63	0.01649085	47.63	0.0155725	47.63	0.02082423	47.63	0.02014871	47.63	0.01939981	47.63	0.01620105
47.8	0.01258491	47.8	0.02088076	47.8	0.01680438	47.8	0.02560087	47.8	0.01356482	47.8	0.0146645	47.8	0.02064224	47.8	0.00679768	47.8	0.01920663	47.8	0.02356308	47.8	0.01658087	47.8	0.02298004	47.8	0.01961429	47.8	0.0172015	47.8	0.01772458	47.8	0.01336583
48	0.00892772	48	0.01927093	48	0.0203692	48	0.02769744	48	0.00918234	48	0.01542661	48	0.02556312	48	0.00425353	48	0.02168583	48	0.02710274	48	0.01423886	48	0.02042831	48	0.01975576	48	0.0163788	48	0.01833262	48	0.01249277
48.2	0.01346502	48.2	0.0199155	48.2	0.01829132	48.2	0.02887081	48.2	0.01156666	48.2	0.01953861	48.2	0.02726872	48.2	0.0093764	48.2	0.01612864	48.2	0.02588448	48.2	0.01469344	48.2	0.01945925	48.2	0.01901332	48.2	0.01878612	48.2	0.0186421	48.2	0.01511775
48.4	0.00889267	48.4	0.02124044	48.4	0.01721351	48.4	0.02770931	48.4	0.0108201	48.4	0.01456438	48.4	0.022129	48.4	0.00513235	48.4	0.01456143	48.4	0.02281143	48.4	0.01357416	48.4	0.01724532	48.4	0.02317392	48.4	0.01779167	48.4	0.02129083	48.4	0.01062135
48.6	0.01126568	48.6	0.02182304	48.6	0.01779512	48.6	0.02908377	48.6	0.01324566	48.6	0.01803801	48.6	0.02385368	48.6	0.00303773	48.6	0.01946171	48.6	0.02289473	48.6	0.00997439	48.6	0.02149378	48.6	0.0198345	48.6	0.01529803	48.6	0.02021936	48.6	0.01589254
48.8	0.01110194	48.8	0.01787777	48.8	0.02334231	48.8	0.02656145	48.8	0.00957119	48.8	0.0134739	48.8	0.02632508	48.8	0.01190142	48.8	0.01403834	48.8	0.02671797	48.8	0.01225121	48.8	0.02007082	48.8	0.01902271	48.8	0.01907361	48.8	0.02387291	48.8	0.01528061
49	0.00864786	49	0.0252269	49	0.01958154	49	0.0329139	49	0.00861814	49	0.01366805	49	0.02305738	49	0.00750616	49	0.01624148	49	0.02492815	49	0.0161141	49	0.02241586	49	0.01756426	49	0.01841388	49	0.01800885	49	0.01472383
49.2	0.00900551	49.2	0.01651628	49.2	0.01759448	49.2	0.0329978	49.2	0.00962268	49.2	0.01717281	49.2	0.02366398	49.2	0.0079455	49.2	0.01926302	49.2	0.02640489	49.2	0.01666043	49.2	0.02038508	49.2	0.02121632	49.2	0.01498454	49.2	0.02175836	49.2	0.01328879
49.4	0.00841891	49.4	0.02182728	49.4	0.01605571	49.4	0.02851621	49.4	0.00926812	49.4	0.01671465	49.4	0.02389955	49.4	0.00946806	49.4	0.0162602	49.4	0.02128771	49.4	0.01394519	49.4	0.02074447	49.4	0.01685409	49.4	0.0139166	49.4	0.01759822	49.4	0.01471439
49.6	0.0037644	49.6	0.01912243	49.6	0.02224486	49.6	0.02925301	49.6	0.0094702	49.6	0.0151549	49.6	0.02246122	49.6	0.00958851	49.6	0.01818184	49.6	0.026823	49.6	0.01174926	49.6	0.01819651	49.6	0.02244155	49.6	0.01858238	49.6	0.01951668	49.6	0.01646253
49.8	0.00805576	49.8	0.02134903	49.8	0.0158325	49.8	0.03146508	49.8	0.00966894	49.8	0.01768219	49.8	0.02284048	49.8	0.00627998	49.8	0.02158619	49.8	0.02679889	49.8	0.01473496	49.8	0.02215675	49.8	0.01898925	49.8	0.01481668	49.8	0.01730815	49.8	0.01764412
50	0.01057569	50	0.02591117	50	0.02105432	50	0.02792829	50	0.0061749	50	0.0151592	50	0.02541343	50	0.00511954	50	0.01610766	50	0.02471734	50	0.01297237	50	0.0219712	50	0.01746959	50	0.01802252	50	0.01481421	50	0.01536753
50.2	0.01023582	50.2	0.01755536	50.2	0.01786306	50.2	0.02707681	50.2	0.0109887	50.2	0.01393493	50.2	0.02340089	50.2	0.00786255	50.2	0.01641899	50.2	0.02527763	50.2	0.01589072	50.2	0.02138127	50.2	0.01893682	50.2	0.02051366	50.2	0.01654119	50.2	0.01372445
50.4	0.01369829	50.4	0.02095408	50.4	0.01728545	50.4	0.02692411	50.4	0.00871824	50.4	0.0184258	50.4	0.02128474	50.4	0.00993276	50.4	0.01648927	50.4	0.02872626	50.4	0.01272883	50.4	0.01784497	50.4	0.01421517	50.4	0.01508434	50.4	0.01849404	50.4	0.01395705
50.6	0.00796233	50.6	0.02498031	50.6	0.01807372	50.6	0.02573513	50.6	0.00966547	50.6	0.01637476	50.6	0.02383427	50.6	0.0085821	50.6	0.01916998	50.6	0.02193599	50.6	0.01505629	50.6	0.01861779	50.6	0.02042613	50.6	0.0157124	50.6	0.01374179	50.6	0.01364926
50.8	0.01150496	50.8	0.01528733	50.8	0.02214431	50.8	0.03038609	50.8	0.00642475	50.8	0.01652024	50.8	0.02537546	50.8	0.00939399	50.8	0.01823254	50.8	0.02229695	50.8	0.01576622	50.8	0.01938451	50.8	0.01744838	50.8	0.01849612	50.8	0.01808473	50.8	0.01881457
51	0.0088147	51	0.02347521	51	0.01939271	51	0.02880773	51	0.01145118	51	0.02090611	51	0.02054284	51	0.00668839	51	0.02092861	51	0.02902302	51	0.01720381	51	0.02205673	51	0.02355722	51	0.01650008	51	0.01846446	51	0.01501538
51.2	0.00775623	51.2	0.02141391	51.2	0.02009827	51.2	0.02798556	51.2	0.01016338	51.2	0.01873285	51.2	0.02702487	51.2	0.00418762	51.2	0.02064133	51.2	0.02541991	51.2	0.01121096	51.2	0.01368921	51.2	0.02236422	51.2	0.01862304	51.2	0.01769669	51.2	0.01206476
51.4	0.00771444	51.4	0.02041457	51.4	0.02021293	51.4	0.02926834	51.4	0.0089197	51.4	0.015375	51.4	0.02246484	51.4	0.00779986	51.4	0.01532716	51.4	0.02922324	51.4	0.01749108	51.4	0.02465416	51.4	0.01751426	51.4	0.01891906	51.4	0.01662385	51.4	0.0191792
51.6	0.0098331	51.6	0.02048242	51.6	0.0177105	51.6	0.03092703	51.6	0.0072485	51.6	0.01240301	51.6	0.02302431	51.6	0.00500846	51.6	0.01679458	51.6	0.02342398	51.6	0.01367387	51.6	0.01865827	51.6	0.02194193	51.6	0.01833131	51.6	0.01749202	51.6	0.01403717
51.8	0.01143898	51.8	0.02322182	51.8	0.01920909	51.8	0.02826722	51.8	0.00944321	51.8	0.01697722	51.8	0.02373742	51.8	0.00889781	51.8	0.01574909	51.8	0.02367641	51.8	0.01474433	51.8	0.02062589	51.8	0.01770615	51.8	0.01586634	51.8	0.01607311	51.8	0.01206957
52	0.0111816	52	0.01594068	52	0.02480855	52	0.02968206	52	0.01172015	52	0.01559561	52	0.02269349	52	0.00695459	52	0.0212096	52	0.02320585	52	0.01447342	52	0.01969258	52	0.01899624	52	0.01924169	52	0.0187897	52	0.01338699
52.2	0.00944238	52.2	0.01562448	52.2	0.02011972	52.2	0.03027239	52.2	0.01092235	52.2	0.01290691	52.2	0.02434715	52.2	0.00814272	52.2	0.01452088	52.2	0.02660328	52.2	0.01596304	52.2	0.02048822	52.2	0.02161705	52.2	0.01452452	52.2	0.02013305	52.2	0.01380168
52.4	0.0108374	52.4	0.02196526	52.4	0.0182232	52.4	0.02649697	52.4	0.01051877	52.4	0.01443794	52.4	0.02257774	52.4	0.0046025	52.4	0.01846472	52.4	0.02007511	52.4	0.01675215	52.4	0.02072585	52.4	0.02026249	52.4	0.02106297	52.4	0.01489524	52.4	0.01609346
52.6	0.00983636	52.6	0.02292262	52.6	0.01841643	52.6	0.0278646	52.6	0.01287559	52.6	0.01777232	52.6	0.02235098	52.6	0.00869453	52.6	0.02138194	52.6	0.02694041	52.6	0.01576414	52.6	0.02185698	52.6	0.02154425	52.6	0.0153593	52.6	0.01768364	52.6	0.01868347
52.8	0.00842998	52.8	0.02089625	52.8	0.01719915	52.8	0.03279198	52.8	0.00937945	52.8	0.01697933	52.8	0.02805511	52.8	0.01068981	52.8	0.01779292	52.8	0.0264423	52.8	0.01687593	52.8	0.01689815	52.8	0.02673324	52.8	0.01731626	52.8	0.01750833	52.8	0.01391945
53	0.00813264	53	0.02329259	53	0.01710873	53	0.02741801	53	0.00958378	53	0.01668481	53	0.02183066	53	0.00596514	53	0.02060535	53	0.02500457	53	0.01476341	53	0.02169128	53	0.01834905	53	0.02104656	53	0.01979733	53	0.0172552
53.2	0.01406577	53.2	0.01624893	53.2	0.01625442	53.2	0.02842502	53.2	0.01611267	53.2	0.01292286	53.2	0.02522629	53.2	0.00731658	53.2	0.01662928	53.2	0.02455652	53.2	0.01514819	53.2	0.01806468	53.2	0.02315573	53.2	0.01907874	53.2	0.02052577	53.2	0.01026519
53.4	0.01172318	53.4	0.02088936	53.4	0.01646381	53.4	0.02914604	53.4	0.00806592	53.4	0.01881635	53.4	0.02313451	53.4	0.00696781	53.4	0.01602604	53.4	0.02055607	53.4	0.01491724	53.4	0.01629882	53.4	0.01656116	53.4	0.01502535	53.4	0.01892517	53.4	0.01436628
53.6	0.00897754	53.6	0.01644936	53.6	0.01631448	53.6	0.03133614	53.6	0.00975889	53.6	0.01528439	53.6	0.02209495	53.6	0.00624247	53.6	0.01793733	53.6	0.02521714	53.6	0.01583142	53.6	0.01699778	53.6	0.01646788	53.6	0.01414482	53.6	0.0189792	53.6	0.01688533
53.8	0.00915438	53.8	0.02001726	53.8	0.02091352	53.8	0.03015216	53.8	0.00978451	53.8	0.01525039	53.8	0.02363072	53.8	0.00741948	53.8	0.02099471	53.8	0.02317429	53.8	0.0157099	53.8	0.01989185	53.8	0.02215504	53.8	0.0149445	53.8	0.01586452	53.8	0.01662884
54	0.01018556	54	0.01723697	54	0.01930597	54	0.0261075	54	0.00797948	54	0.01592391	54	0.02067983	54	0.0032287	54	0.01650905	54	0.0286693	54	0.01414229	54	0.02131957	54	0.02348264	54	0.01748824	54	0.02048101	54	0.01267888
54.2	0.01234081	54.2	0.01933043	54.2	0.01913584	54.2	0.02953311	54.2	0.01197255	54.2	0.01538227	54.2	0.02254362	54.2	0.00419054	54.2	0.01770472	54.2	0.02719718	54.2	0.01497591	54.2	0.02363116	54.2	0.01750084	54.2	0.01914531	54.2	0.02529436	54.2	0.01505274
54.4	0.01132451	54.4	0.02538086	54.4	0.01937866	54.4	0.0308729	54.4	0.00921068	54.4	0.01740218	54.4	0.02636569	54.4	0.00842702	54.4	0.01742708	54.4	0.02497197	54.4	0.01277879	54.4	0.02194796	54.4	0.01688671	54.4	0.02150322	54.4	0.0162434	54.4	0.00835331
54.6	0.01469022	54.6	0.02173777	54.6	0.0177301	54.6	0.02920385	54.6	0.010376	54.6	0.01627356	54.6	0.02094105	54.6	0.00864726	54.6	0.01972991	54.6	0.02564067	54.6	0.01413672	54.6	0.01955582	54.6	0.01755575	54.6	0.01407392	54.6	0.0192526	54.6	0.01333426
54.8	0.01364603	54.8	0.01947672	54.8	0.01821347	54.8	0.03218682	54.8	0.00960117	54.8	0.01732077	54.8	0.02318837	54.8	0.00276826	54.8	0.01746091	54.8	0.02384143	54.8	0.0181125	54.8	0.01924374	54.8	0.0183845	54.8	0.02007658	54.8	0.02192762	54.8	0.01849896
55	0.01242829	55	0.01898693	55	0.0219834	55	0.0339785	55	0.01244753	55	0.0186508	55	0.02508754	55	0.00493831	55	0.02118424	55	0.02319859	55	0.01640198	55	0.02032345	55	0.02128797	55	0.02037552	55	0.01914974	55	0.01225721
55.2	0.01165191	55.2	0.0209293	55.2	0.01799158	55.2	0.03383974	55.2	0.01195205	55.2	0.01690775	55.2	0.02252214	55.2	0.00754187	55.2	0.01816892	55.2	0.02954251	55.2	0.01202742	55.2	0.02098477	55.2	0.02131172	55.2	0.0180984	55.2	0.02115907	55.2	0.01653261
55.4	0.00669378	55.4	0.02340186	55.4	0.01638833	55.4	0.02811612	55.4	0.01140045	55.4	0.01798307	55.4	0.02068361	55.4	0.00918458	55.4	0.02017067	55.4	0.0243245	55.4	0.01791642	55.4	0.02204672	55.4	0.01871234	55.4	0.01847792	55.4	0.01953801	55.4	0.01353955
55.6	0.0120142	55.6	0.02286785	55.6	0.0184332	55.6	0.02959602	55.6	0.01319989	55.6	0.01587612	55.6	0.02188872	55.6	0.00444088	55.6	0.02360376	55.6	0.0230767	55.6	0.0145449	55.6	0.01736347	55.6	0.01885828	55.6	0.01604528	55.6	0.01767725	55.6	0.01596439
55.8	0.01526704	55.8	0.02379946	55.8	0.01706098	55.8	0.02866873	55.8	0.0095235	55.8	0.01710193	55.8	0.02631089	55.8	0.00271871	55.8	0.01648338	55.8	0.02399942	55.8	0.01704099	55.8	0.01895046	55.8	0.02315439	55.8	0.02038511	55.8	0.02400281	55.8	0.01803854
56	0.01105769	56	0.02011462	56	0.01912848	56	0.02790801	56	0.01137892	56	0.01396285	56	0.02308206	56	0.00565504	56	0.01966715	56	0.02773347	56	0.01403409	56	0.01819437	56	0.02074869	56	0.01847226	56	0.01617846	56	0.0196713
56.2	0.00764786	56.2	0.02085624	56.2	0.01808039	56.2	0.03156017	56.2	0.01308732	56.2	0.01665502	56.2	0.02860853	56.2	0.00939455	56.2	0.01692328	56.2	0.02878226	56.2	0.01659939	56.2	0.02186997	56.2	0.02095521	56.2	0.02227497	56.2	0.01780946	56.2	0.01521291
56.4	0.00972472	56.4	0.01944871	56.4	0.01879061	56.4	0.03007936	56.4	0.00931286	56.4	0.01822569	56.4	0.02322528	56.4	0.0103219	56.4	0.01665396	56.4	0.02824493	56.4	0.01578294	56.4	0.01894547	56.4	0.02107743	56.4	0.01798641	56.4	0.02345215	56.4	0.0134445
56.6	0.01015412	56.6	0.01744328	56.6	0.01556175	56.6	0.03492023	56.6	0.0129262	56.6	0.01503189	56.6	0.02052386	56.6	0.00732316	56.6	0.01793604	56.6	0.02752946	56.6	0.01325336	56.6	0.02329811	56.6	0.02028225	56.6	0.02034231	56.6	0.021342	56.6	0.01819697
56.8	0.01059915	56.8	0.02496593	56.8	0.02060413	56.8	0.0288861	56.8	0.00886706	56.8	0.0136318	56.8	0.02421917	56.8	0.00557982	56.8	0.01782219	56.8	0.02786555	56.8	0.01331957	56.8	0.02107549	56.8	0.02699925	56.8	0.0160516	56.8	0.01941992	56.8	0.01890321
57	0.00990772	57	0.02019052	57	0.01868847	57	0.03419781	57	0.00941068	57	0.01564973	57	0.02279313	57	0.0092916	57	0.01528741	57	0.02111342	57	0.01461841	57	0.01686243	57	0.02265115	57	0.01736733	57	0.01924792	57	0.01504836
57.2	0.00423224	57.2	0.01787419	57.2	0.01861875	57.2	0.03531186	57.2	0.00830613	57.2	0.01897139	57.2	0.01997412	57.2	0.0068271	57.2	0.02200868	57.2	0.02633969	57.2	0.02008016	57.2	0.02052656	57.2	0.02426975	57.2	0.01885249	57.2	0.0200313	57.2	0.01287361
57.4	0.01353692	57.4	0.02513715	57.4	0.01757204	57.4	0.03316543	57.4	0.00889039	57.4	0.01224576	57.4	0.0256616	57.4	0.00953355	57.4	0.01909768	57.4	0.02398218	57.4	0.01426527	57.4	0.0187722	57.4	0.01912295	57.4	0.02034799	57.4	0.02041082	57.4	0.01708065
57.6	0.01188246	57.6	0.0210306	57.6	0.01798812	57.6	0.03426808	57.6	0.00485752	57.6	0.01630247	57.6	0.02602183	57.6	0.00630246	57.6	0.017199	57.6	0.02612067	57.6	0.01646749	57.6	0.02120363	57.6	0.01982661	57.6	0.01552283	57.6	0.02041958	57.6	0.01584481
57.81	0.00774495	57.81	0.02242312	57.81	0.02236063	57.81	0.03026436	57.81	0.01209562	57.81	0.01678367	57.81	0.02249974	57.81	0.00743438	57.8	0.01755677	57.8	0.02517536	57.8	0.01698359	57.8	0.0197659	57.8	0.02100204	57.8	0.01761244	57.8	0.02143044	57.8	0.01410266
58	0.01018852	58	0.0213829	58	0.01792669	58	0.02969947	58	0.0114896	58	0.01428065	58	0.03232054	58	0.00754605	58	0.01971318	58	0.02613834	58	0.01620478	58	0.02121972	58	0.02270234	58	0.02128281	58	0.02316988	58	0.0142301
58.2	0.01184036	58.2	0.0218469	58.2	0.02020443	58.2	0.03147522	58.2	0.01122459	58.2	0.0212837	58.2	0.02575201	58.2	0.00661986	58.2	0.0207386	58.2	0.02588078	58.2	0.01523044	58.2	0.02103402	58.2	0.02340577	58.2	0.01510853	58.2	0.01642911	58.2	0.01329892
58.4	0.01188923	58.4	0.02913649	58.4	0.02314255	58.4	0.02895215	58.4	0.00778474	58.4	0.01249982	58.4	0.02657741	58.4	0.00734466	58.4	0.0172126	58.4	0.02376544	58.4	0.01434647	58.4	0.01719566	58.4	0.02024927	58.4	0.01909624	58.4	0.01781059	58.4	0.01510369
58.6	0.01346178	58.6	0.01803472	58.6	0.01550621	58.6	0.02978895	58.6	0.0098208	58.6	0.01305517	58.6	0.02454028	58.6	0.00703073	58.6	0.01609608	58.6	0.02641825	58.6	0.01547366	58.6	0.02228304	58.6	0.02015004	58.6	0.02244649	58.6	0.01981104	58.6	0.01290713
58.8	0.00984823	58.8	0.0198111	58.8	0.02071265	58.8	0.03402697	58.8	0.01012984	58.8	0.01505315	58.8	0.02996211	58.8	0.00434275	58.8	0.01660064	58.8	0.02796779	58.8	0.01780062	58.8	0.02331989	58.8	0.02355264	58.8	0.01802367	58.8	0.02278722	58.8	0.01219499
59	0.00851164	59	0.02638098	59	0.02126916	59	0.03290505	59	0.00920616	59	0.02159695	59	0.02276276	59	0.00728004	59	0.02198153	59	0.02679651	59	0.01612826	59	0.02322979	59	0.02267574	59	0.02234813	59	0.01650748	59	0.0186839
59.2	0.01143525	59.2	0.01990353	59.2	0.02066011	59.2	0.03159358	59.2	0.01530758	59.2	0.01539267	59.2	0.02308724	59.2	0.00658859	59.2	0.02044549	59.2	0.02337315	59.2	0.0152311	59.2	0.01861261	59.2	0.02516758	59.2	0.02051451	59.2	0.01902046	59.2	0.01754828
59.4	0.01573774	59.4	0.02200311	59.4	0.02341535	59.4	0.03020345	59.4	0.01500214	59.4	0.01471988	59.4	0.02886934	59.4	0.00551945	59.4	0.01762788	59.4	0.0249719	59.4	0.01994755	59.4	0.02011804	59.4	0.0240029	59.4	0.01654698	59.4	0.01824352	59.4	0.01528039
59.6	0.01096119	59.6	0.01711588	59.6	0.01357868	59.6	0.03099388	59.6	0.01056487	59.6	0.01543776	59.6	0.02425083	59.6	0.00987447	59.6	0.01914608	59.6	0.02532793	59.6	0.01607919	59.6	0.02662348	59.6	0.0152738	59.6	0.02145594	59.6	0.02213179	59.6	0.01504315
59.8	0.01209629	59.8	0.01591458	59.8	0.0202577	59.8	0.03099068	59.8	0.01501899	59.8	0.01718992	59.8	0.02232928	59.8	0.00700775	59.8	0.0222862	59.8	0.02342313	59.8	0.01789626	59.8	0.02074746	59.8	0.02145608	59.8	0.02029136	59.8	0.02089737	59.8	0.01409256
60	-2.894986	60	-3.011163	60	-3.027425	60	-2.981069	60	-2.987895	60	-3.04234	60	-3.089557	60	-3.070012	60	-2.696023	60	-2.833372	60	-2.880961	60	-2.828595	60	-2.831537	60	-2.86277	60	-2.913185	60	-2.795266
60.2	-3.150028	60.2	-3.238271	60.2	-3.252874	60.2	-3.226593	60.2	-3.217642	60.2	-3.273775	60.2	-3.327303	60.2	-3.28724	60.2	-2.922017	60.2	-3.054124	60.2	-3.095665	60.2	-3.058236	60.2	-3.073803	60.2	-3.095908	60.2	-3.100202	60.2	-3.014908
60.4	-3.291847	60.4	-3.375086	60.4	-3.397877	60.4	-3.378481	60.4	-3.353133	60.4	-3.422485	60.4	-3.472891	60.4	-3.433339	60.4	-3.046196	60.4	-3.161134	60.4	-3.206525	60.4	-3.173335	60.4	-3.192231	60.4	-3.203452	60.4	-3.204211	60.4	-3.137047
60.6	-3.399326	60.6	-3.463601	60.6	-3.485413	60.6	-3.473138	60.6	-3.448202	60.6	-3.509708	60.6	-3.572886	60.6	-3.527947	60.6	-3.116583	60.6	-3.236171	60.6	-3.28676	60.6	-3.25337	60.6	-3.270525	60.6	-3.282278	60.6	-3.282312	60.6	-3.219654
60.8	-3.472507	60.8	-3.537461	60.8	-3.557148	60.8	-3.547817	60.8	-3.52098	60.8	-3.582689	60.8	-3.649342	60.8	-3.60593	60.8	-3.178414	60.8	-3.305902	60.8	-3.34699	60.8	-3.319226	60.8	-3.337965	60.8	-3.353564	60.8	-3.340247	60.8	-3.283324
61	-3.541053	61	-3.606828	61	-3.614543	61	-3.612553	61	-3.584091	61	-3.650022	61	-3.71476	61	-3.673266	61	-3.233797	61	-3.362863	61	-3.398175	61	-3.373682	61	-3.394352	61	-3.404511	61	-3.394199	61	-3.335479
61.2	-3.58815	61.2	-3.660018	61.2	-3.672723	61.2	-3.66379	61.2	-3.636999	61.2	-3.705978	61.2	-3.771327	61.2	-3.726151	61.2	-3.279759	61.2	-3.407387	61.2	-3.444619	61.2	-3.41653	61.2	-3.43762	61.2	-3.447096	61.2	-3.437964	61.2	-3.386085
61.4	-3.646668	61.4	-3.703587	61.4	-3.722183	61.4	-3.716931	61.4	-3.684551	61.4	-3.752348	61.4	-3.819333	61.4	-3.772625	61.4	-3.319991	61.4	-3.441671	61.4	-3.482526	61.4	-3.460412	61.4	-3.479524	61.4	-3.4908	61.4	-3.473954	61.4	-3.420847
61.6	-3.683965	61.6	-3.747517	61.6	-3.761388	61.6	-3.75966	61.6	-3.728523	61.6	-3.79978	61.6	-3.867263	61.6	-3.814006	61.6	-3.353117	61.6	-3.474831	61.6	-3.520443	61.6	-3.495686	61.6	-3.514212	61.6	-3.522151	61.6	-3.510257	61.6	-3.457353
61.8	-3.721616	61.8	-3.783294	61.8	-3.79976	61.8	-3.798305	61.8	-3.760723	61.8	-3.832605	61.8	-3.903129	61.8	-3.854331	61.8	-3.387636	61.8	-3.503362	61.8	-3.549958	61.8	-3.52331	61.8	-3.545013	61.8	-3.554602	61.8	-3.540798	61.8	-3.492771
62	-3.753483	62	-3.81917	62	-3.831965	62	-3.83077	62	-3.796417	62	-3.864489	62	-3.937534	62	-3.889771	62	-3.412949	62	-3.530258	62	-3.582277	62	-3.556812	62	-3.577283	62	-3.584507	62	-3.567671	62	-3.518959
62.21	-3.782362	62.21	-3.853785	62.21	-3.866868	62.21	-3.864293	62.21	-3.825138	62.21	-3.902311	62.21	-3.969724	62.21	-3.928208	62.2	-3.438618	62.2	-3.5591	62.2	-3.602104	62.2	-3.578722	62.2	-3.602003	62.2	-3.605582	62.2	-3.589152	62.2	-3.543772
62.4	-3.810451	62.4	-3.88429	62.4	-3.892257	62.4	-3.889652	62.4	-3.854705	62.4	-3.93518	62.4	-3.995181	62.4	-3.956364	62.4	-3.464334	62.4	-3.579465	62.4	-3.627695	62.4	-3.599922	62.4	-3.622208	62.4	-3.62958	62.4	-3.617065	62.4	-3.5687
62.6	-3.838977	62.6	-3.905049	62.6	-3.917725	62.6	-3.91806	62.6	-3.881752	62.6	-3.955345	62.6	-4.021073	62.6	-3.97829	62.6	-3.479799	62.6	-3.604132	62.6	-3.652195	62.6	-3.624171	62.6	-3.645465	62.6	-3.651297	62.6	-3.639786	62.6	-3.581298
62.8	-3.862849	62.8	-3.933706	62.8	-3.945487	62.8	-3.939341	62.8	-3.902009	62.8	-3.985664	62.8	-4.050594	62.8	-4.004293	62.8	-3.498389	62.8	-3.623369	62.8	-3.67375	62.8	-3.644943	62.8	-3.671892	62.8	-3.669059	62.8	-3.659288	62.8	-3.616895
63	-3.890032	63	-3.953752	63	-3.963684	63	-3.962601	63	-3.926071	63	-4.004877	63	-4.067241	63	-4.030794	63	-3.521919	63	-3.644656	63	-3.689946	63	-3.6694	63	-3.690448	63	-3.693917	63	-3.671112	63	-3.626404
63.2	-3.912175	63.2	-3.979918	63.2	-3.990171	63.2	-3.984977	63.2	-3.947455	63.2	-4.028019	63.2	-4.093688	63.2	-4.046361	63.2	-3.541027	63.2	-3.66191	63.2	-3.710035	63.2	-3.681733	63.2	-3.705408	63.2	-3.698851	63.2	-3.68927	63.2	-3.647169
63.4	-3.928115	63.4	-3.992985	63.4	-4.002332	63.4	-4.004739	63.4	-3.967123	63.4	-4.047649	63.4	-4.113144	63.4	-4.071637	63.41	-3.551353	63.41	-3.680665	63.41	-3.726694	63.41	-3.697255	63.41	-3.721076	63.41	-3.723979	63.41	-3.710893	63.41	-3.666873
63.6	-3.940075	63.6	-4.011637	63.6	-4.021383	63.6	-4.02114	63.6	-3.981813	63.6	-4.065171	63.6	-4.130603	63.6	-4.088329	63.6	-3.570383	63.6	-3.689357	63.6	-3.742995	63.6	-3.715096	63.6	-3.738232	63.6	-3.738836	63.6	-3.722409	63.6	-3.677269
63.8	-3.961684	63.8	-4.028523	63.8	-4.041868	63.8	-4.043284	63.8	-4.007401	63.8	-4.084584	63.8	-4.153642	63.8	-4.104265	63.8	-3.582247	63.8	-3.703418	63.8	-3.75457	63.8	-3.727101	63.8	-3.753263	63.8	-3.753614	63.8	-3.742793	63.8	-3.697216
64	-3.980014	64	-4.044895	64	-4.059452	64	-4.062608	64	-4.017631	64	-4.102968	64	-4.165763	64	-4.124802	64	-3.593425	64	-3.720922	64	-3.768457	64	-3.747102	64	-3.771293	64	-3.763186	64	-3.755833	64	-3.709935
64.2	-4.000119	64.2	-4.06749	64.2	-4.081509	64.2	-4.075999	64.2	-4.040308	64.2	-4.11797	64.2	-4.183753	64.2	-4.141342	64.2	-3.609229	64.2	-3.735516	64.2	-3.784751	64.2	-3.759454	64.2	-3.780832	64.2	-3.784891	64.2	-3.76948	64.2	-3.723491
64.4	-4.006994	64.4	-4.079972	64.4	-4.091569	64.4	-4.090324	64.4	-4.050566	64.4	-4.129272	64.4	-4.195519	64.4	-4.158587	64.4	-3.620555	64.4	-3.742979	64.4	-3.794818	64.4	-3.771947	64.4	-3.798815	64.4	-3.797887	64.4	-3.7786	64.4	-3.734547
64.6	-4.021331	64.6	-4.087599	64.6	-4.098086	64.6	-4.102941	64.6	-4.063276	64.6	-4.142935	64.6	-4.213421	64.6	-4.170904	64.6	-3.63382	64.6	-3.757194	64.6	-3.805892	64.6	-3.780822	64.6	-3.802161	64.6	-3.806474	64.6	-3.790506	64.6	-3.747012
64.81	-4.02793	64.81	-4.097728	64.81	-4.111102	64.81	-4.11458	64.81	-4.073709	64.81	-4.153409	64.81	-4.220929	64.81	-4.177136	64.8	-3.638524	64.8	-3.762641	64.8	-3.813135	64.8	-3.788422	64.8	-3.813945	64.8	-3.813305	64.8	-3.796534	64.8	-3.753346
65.01	-0.5503852	65.01	-0.5201682	65.01	-0.4836608	65.01	-0.458475	65.01	-0.4865014	65.01	-0.5456747	65.01	-0.531794	65.01	-0.5415649	65	-0.4603612	65	-0.5017452	65	-0.5055938	65	-0.4906431	65	-0.4909323	65	-0.4968884	65	-0.4869079	65	-0.4501089
65.21	-0.5235038	65.21	-0.4957297	65.21	-0.4536818	65.21	-0.435845	65.21	-0.4550056	65.21	-0.5202612	65.21	-0.5139126	65.21	-0.5098108	65.2	-0.4690351	65.2	-0.4878307	65.2	-0.4867783	65.2	-0.481016	65.2	-0.4799688	65.2	-0.4807937	65.2	-0.4770238	65.2	-0.4371253
65.41	-0.491003	65.41	-0.458839	65.41	-0.4263213	65.41	-0.406896	65.41	-0.4337163	65.41	-0.4859967	65.41	-0.4900699	65.41	-0.4789666	65.4	-0.4433764	65.4	-0.4578492	65.4	-0.4581152	65.4	-0.4541379	65.4	-0.4594231	65.4	-0.4541942	65.4	-0.4551087	65.4	-0.4095967
65.61	-0.4631032	65.61	-0.4364602	65.61	-0.4003007	65.61	-0.3842801	65.61	-0.4085044	65.61	-0.4608968	65.61	-0.4605262	65.61	-0.4553768	65.6	-0.4142406	65.6	-0.4328217	65.6	-0.4362459	65.6	-0.4287887	65.6	-0.4340078	65.6	-0.4319638	65.6	-0.429139	65.6	-0.3829924
65.81	-0.4430463	65.81	-0.4187455	65.81	-0.3828723	65.81	-0.3648418	65.81	-0.3920721	65.81	-0.4399966	65.81	-0.4380952	65.81	-0.4355105	65.8	-0.3993877	65.8	-0.4114642	65.8	-0.4201837	65.8	-0.4113009	65.8	-0.4191512	65.8	-0.4095628	65.8	-0.4123742	65.8	-0.3694682
66.01	-0.4278712	66.01	-0.4036741	66.01	-0.3683158	66.01	-0.349841	66.01	-0.3733463	66.01	-0.4158931	66.01	-0.422473	66.01	-0.4203613	66	-0.3821178	66	-0.4049746	66	-0.4034972	66	-0.3988951	66	-0.4023012	66	-0.3965469	66	-0.3964999	66	-0.3528759
66.21	-0.4119702	66.21	-0.3848644	66.21	-0.3506949	66.21	-0.3326979	66.21	-0.3588542	66.21	-0.4048804	66.21	-0.4041847	66.21	-0.4087335	66.2	-0.3681377	66.2	-0.3851255	66.2	-0.3940615	66.2	-0.3832038	66.2	-0.3896761	66.2	-0.3824726	66.2	-0.3849093	66.2	-0.3361442
66.41	-0.4029328	66.41	-0.3757574	66.41	-0.3429195	66.41	-0.3190943	66.41	-0.3521625	66.41	-0.3910994	66.41	-0.3840037	66.41	-0.3893763	66.4	-0.3535329	66.4	-0.3756857	66.4	-0.3790201	66.4	-0.3765236	66.4	-0.3753883	66.4	-0.3730784	66.4	-0.3690056	66.4	-0.3303768
66.61	-0.3908499	66.61	-0.3666851	66.61	-0.3313228	66.61	-0.3063246	66.61	-0.3338247	66.61	-0.3841291	66.61	-0.3751823	66.61	-0.3804754	66.6	-0.3525337	66.6	-0.3730281	66.6	-0.3733217	66.6	-0.3629245	66.6	-0.3701607	66.6	-0.3663034	66.6	-0.3610406	66.6	-0.3188039
66.81	-0.3808556	66.81	-0.3552786	66.81	-0.3197554	66.81	-0.3006155	66.81	-0.3270179	66.81	-0.3691098	66.81	-0.365036	66.81	-0.3723734	66.8	-0.3418387	66.8	-0.3605484	66.8	-0.3590454	66.8	-0.3551922	66.8	-0.3557777	66.8	-0.3579418	66.8	-0.3485579	66.8	-0.311994
67.01	-0.3737763	67.01	-0.3451439	67.01	-0.3107653	67.01	-0.2873586	67.01	-0.3213833	67.01	-0.3605767	67.01	-0.3557487	67.01	-0.366404	67	-0.3337742	67	-0.3532943	67	-0.3571151	67	-0.3468291	67	-0.3508707	67	-0.3472636	67	-0.3437687	67	-0.3090312
67.21	-0.3636755	67.21	-0.3384511	67.21	-0.3032259	67.21	-0.2807388	67.21	-0.3125836	67.21	-0.3503049	67.21	-0.3475007	67.21	-0.354425	67.2	-0.3315929	67.2	-0.3442099	67.2	-0.3470268	67.2	-0.3417353	67.2	-0.3456557	67.2	-0.3402128	67.2	-0.3362233	67.2	-0.2980151
67.41	-0.353353	67.41	-0.3321339	67.41	-0.2976688	67.41	-0.2755743	67.41	-0.3070343	67.41	-0.3456296	67.41	-0.336495	67.41	-0.345675	67.4	-0.3229772	67.4	-0.3378924	67.4	-0.3431719	67.4	-0.340021	67.4	-0.3366946	67.4	-0.3379174	67.4	-0.3289677	67.4	-0.2908016
67.61	-0.3501832	67.61	-0.3241509	67.61	-0.2857518	67.61	-0.2652273	67.61	-0.2980867	67.61	-0.3415698	67.61	-0.3298506	67.61	-0.3344356	67.6	-0.3167466	67.6	-0.3313936	67.6	-0.3346462	67.6	-0.3314559	67.6	-0.3326252	67.6	-0.3313454	67.6	-0.329607	67.6	-0.2876093
67.81	-0.3421758	67.81	-0.3135149	67.81	-0.2842424	67.81	-0.2613852	67.81	-0.2881522	67.81	-0.3338522	67.81	-0.3264329	67.81	-0.3349662	67.8	-0.3192748	67.8	-0.3271975	67.8	-0.3361271	67.8	-0.3265187	67.8	-0.3319495	67.8	-0.326805	67.8	-0.3158448	67.8	-0.2858241
68.01	-0.3372894	68.01	-0.3121416	68.01	-0.2733451	68.01	-0.2580185	68.01	-0.2887378	68.01	-0.3233455	68.01	-0.3240142	68.01	-0.3314813	68	-0.3104963	68	-0.3238411	68	-0.3261666	68	-0.3258778	68	-0.3270707	68	-0.318111	68	-0.3151189	68	-0.2793987
68.21	-0.3269998	68.21	-0.3047944	68.21	-0.2733977	68.21	-0.2447984	68.21	-0.2839827	68.21	-0.3162755	68.21	-0.310456	68.21	-0.3204348	68.2	-0.3023582	68.2	-0.3181378	68.2	-0.3260008	68.2	-0.3170873	68.2	-0.3221737	68.2	-0.3169842	68.2	-0.3143088	68.2	-0.2766308
68.41	-0.3224824	68.41	-0.2958943	68.41	-0.2633342	68.41	-0.2441139	68.41	-0.2751339	68.41	-0.3136802	68.41	-0.3100152	68.41	-0.315849	68.4	-0.2982593	68.4	-0.3203093	68.4	-0.3185697	68.4	-0.3106252	68.4	-0.3154541	68.4	-0.3127854	68.4	-0.3066152	68.4	-0.2682801
68.61	-0.3238439	68.61	-0.2940516	68.61	-0.2600891	68.61	-0.2326577	68.61	-0.2679711	68.61	-0.3088028	68.61	-0.3004021	68.61	-0.3151049	68.6	-0.2967695	68.6	-0.3102982	68.6	-0.3147929	68.6	-0.3105031	68.6	-0.3114525	68.6	-0.3117043	68.6	-0.2994256	68.6	-0.2716729
68.81	-0.3187814	68.81	-0.2923675	68.81	-0.2585456	68.81	-0.2327128	68.81	-0.2656505	68.81	-0.3049228	68.81	-0.2928452	68.81	-0.3127057	68.8	-0.295203	68.8	-0.3088587	68.8	-0.3111762	68.8	-0.3073235	68.8	-0.3079344	68.8	-0.3030377	68.8	-0.2976778	68.8	-0.2662558
69.01	-0.3106667	69.01	-0.28183	69.01	-0.253542	69.01	-0.2305531	69.01	-0.2583907	69.01	-0.2966694	69.01	-0.2884759	69.01	-0.3058245	69	-0.2934645	69	-0.3093386	69	-0.3075161	69	-0.3077007	69	-0.3003631	69	-0.3037543	69	-0.2990111	69	-0.2607149
69.21	-0.3075881	69.21	-0.2826029	69.21	-0.2506741	69.21	-0.2222353	69.21	-0.2561534	69.21	-0.2926377	69.21	-0.2866077	69.21	-0.2987004	69.2	-0.2878938	69.2	-0.3005958	69.2	-0.3040937	69.2	-0.2970271	69.2	-0.3047212	69.2	-0.2981018	69.2	-0.2931229	69.2	-0.2569759
69.41	-0.3041083	69.41	-0.2824925	69.41	-0.2481577	69.41	-0.2185089	69.41	-0.2523414	69.41	-0.2896833	69.41	-0.2824253	69.41	-0.2964834	69.4	-0.2803538	69.4	-0.3003159	69.4	-0.3010517	69.4	-0.2962941	69.4	-0.3001013	69.4	-0.2966918	69.4	-0.2880089	69.4	-0.2560986
69.61	-0.3026854	69.61	-0.2759434	69.61	-0.2432214	69.61	-0.2155746	69.61	-0.2525083	69.61	-0.2794068	69.61	-0.2764512	69.61	-0.2932968	69.6	-0.2801167	69.6	-0.2945901	69.6	-0.3012959	69.6	-0.2942518	69.6	-0.3018062	69.6	-0.2930484	69.6	-0.2878264	69.6	-0.2551215
69.81	-0.298259	69.81	-0.2720324	69.81	-0.2395289	69.81	-0.2154914	69.81	-0.2463873	69.81	-0.2851331	69.81	-0.275211	69.81	-0.2892722	69.8	-0.2805799	69.8	-0.294098	69.8	-0.2981865	69.8	-0.2922376	69.8	-0.2971025	69.8	-0.2925146	69.8	-0.2858433	69.8	-0.2506269
70.01	-3.351411	70.01	-3.421293	70.01	-3.449128	70.01	-3.382515	70.01	-3.371381	70.01	-3.46383	70.01	-3.587204	70.01	-3.436589	70	-3.177275	70	-3.315988	70	-3.366826	70	-3.324446	70	-3.32147	70	-3.362148	70	-3.382385	70	-3.257724
70.21	-3.587176	70.21	-3.652286	70.21	-3.665211	70.21	-3.643834	70.21	-3.618503	70.21	-3.700413	70.21	-3.787323	70.21	-3.688698	70.2	-3.346023	70.2	-3.477176	70.2	-3.524393	70.2	-3.489617	70.2	-3.505665	70.2	-3.513061	70.2	-3.509825	70.2	-3.446908
70.41	-3.693038	70.41	-3.765032	70.41	-3.77504	70.41	-3.75662	70.41	-3.732886	70.41	-3.800695	70.41	-3.887112	70.41	-3.797957	70.4	-3.418204	70.4	-3.550831	70.4	-3.595927	70.4	-3.57375	70.4	-3.585458	70.4	-3.587432	70.4	-3.577046	70.4	-3.52256
70.61	-3.760867	70.61	-3.82658	70.61	-3.831984	70.61	-3.821757	70.61	-3.797303	70.61	-3.869466	70.61	-3.940644	70.61	-3.868874	70.6	-3.465489	70.6	-3.599978	70.6	-3.632808	70.6	-3.619583	70.6	-3.638107	70.6	-3.635956	70.6	-3.619014	70.6	-3.573483
70.81	-3.802256	70.81	-3.883946	70.81	-3.880831	70.81	-3.871008	70.81	-3.841888	70.81	-3.920873	70.81	-3.99198	70.81	-3.91593	70.8	-3.506291	70.8	-3.630086	70.8	-3.674518	70.8	-3.649473	70.8	-3.670156	70.8	-3.672466	70.8	-3.654739	70.8	-3.603622
71.01	-3.846655	71.01	-3.916168	71.01	-3.915817	71.01	-3.908396	71.01	-3.880039	71.01	-3.955927	71.01	-4.028626	71.01	-3.953527	71	-3.534303	71	-3.661149	71	-3.704079	71	-3.685023	71	-3.70033	71	-3.706231	71	-3.680406	71	-3.634831
71.21	-3.878038	71.21	-3.946875	71.21	-3.945819	71.21	-3.939378	71.21	-3.910344	71.21	-3.984193	71.21	-4.061178	71.21	-3.988022	71.2	-3.557686	71.2	-3.68686	71.2	-3.728156	71.2	-3.708115	71.2	-3.726668	71.2	-3.725799	71.2	-3.70073	71.2	-3.6599
71.41	-3.898511	71.41	-3.97497	71.41	-3.974959	71.41	-3.964427	71.41	-3.940109	71.41	-4.019745	71.41	-4.087607	71.41	-4.011304	71.4	-3.574563	71.4	-3.706695	71.4	-3.745848	71.4	-3.728372	71.4	-3.747338	71.4	-3.74957	71.4	-3.728187	71.4	-3.685748
71.61	-3.925324	71.61	-4.000012	71.61	-3.997424	71.61	-3.99351	71.61	-3.961927	71.61	-4.044406	71.61	-4.108677	71.61	-4.037451	71.6	-3.594045	71.6	-3.726528	71.6	-3.767956	71.6	-3.747535	71.6	-3.765186	71.6	-3.766934	71.6	-3.743895	71.6	-3.704934
71.81	-3.948767	71.81	-4.01647	71.81	-4.018934	71.81	-4.015267	71.81	-3.989702	71.81	-4.059854	71.81	-4.129434	71.81	-4.062224	71.8	-3.605137	71.8	-3.746481	71.8	-3.7773	71.8	-3.762089	71.8	-3.783593	71.8	-3.784145	71.8	-3.757465	71.8	-3.71926
72.01	-3.96448	72.01	-4.039356	72.01	-4.031614	72.01	-4.030183	72.01	-4.005734	72.01	-4.081459	72.01	-4.147022	72.01	-4.078705	72	-3.619601	72	-3.758783	72	-3.800596	72	-3.780848	72	-3.802672	72	-3.799616	72	-3.770381	72	-3.735493
72.21	-3.985617	72.21	-4.057408	72.21	-4.054232	72.21	-4.04816	72.21	-4.018822	72.21	-4.099939	72.21	-4.167305	72.21	-4.09414	72.2	-3.635581	72.2	-3.775542	72.2	-3.815294	72.2	-3.79232	72.2	-3.813536	72.2	-3.813725	72.2	-3.789844	72.2	-3.74746
72.41	-3.999569	72.41	-4.072822	72.41	-4.072525	72.41	-4.067954	72.41	-4.035399	72.41	-4.11681	72.41	-4.184871	72.41	-4.115281	72.4	-3.644491	72.4	-3.783048	72.4	-3.823628	72.4	-3.803387	72.4	-3.823859	72.4	-3.825643	72.4	-3.800568	72.4	-3.760196
72.61	-4.014428	72.61	-4.083858	72.61	-4.084602	72.61	-4.081327	72.61	-4.051511	72.61	-4.131688	72.61	-4.199602	72.61	-4.131186	72.6	-3.658607	72.6	-3.792012	72.6	-3.83512	72.6	-3.817438	72.6	-3.837562	72.6	-3.831778	72.6	-3.810741	72.6	-3.775254
72.81	-4.02447	72.81	-4.095865	72.81	-4.09537	72.81	-4.092768	72.81	-4.059915	72.81	-4.149062	72.81	-4.211305	72.81	-4.141266	72.8	-3.66924	72.8	-3.805029	72.8	-3.847497	72.8	-3.823968	72.8	-3.846231	72.8	-3.848783	72.8	-3.825514	72.8	-3.787545
73.01	-4.032595	73.01	-4.109749	73.01	-4.110163	73.01	-4.109604	73.01	-4.074715	73.01	-4.158412	73.01	-4.221824	73.01	-4.159879	73	-3.684113	73	-3.818414	73	-3.860007	73	-3.838428	73	-3.862151	73	-3.856084	73	-3.835618	73	-3.797506
73.21	-4.049022	73.21	-4.126064	73.21	-4.126061	73.21	-4.119678	73.21	-4.091965	73.21	-4.166207	73.21	-4.236536	73.21	-4.165003	73.2	-3.686673	73.2	-3.826757	73.2	-3.868559	73.2	-3.850028	73.2	-3.871395	73.2	-3.863632	73.2	-3.840411	73.2	-3.806339
73.41	-4.0608	73.41	-4.129674	73.41	-4.134128	73.41	-4.135329	73.41	-4.097382	73.41	-4.178012	73.41	-4.247083	73.41	-4.181846	73.4	-3.700487	73.4	-3.830981	73.4	-3.876757	73.4	-3.858811	73.4	-3.881126	73.4	-3.880051	73.4	-3.854123	73.4	-3.818216
73.62	-4.069169	73.62	-4.147884	73.62	-4.139051	73.62	-4.140464	73.62	-4.11364	73.62	-4.195877	73.62	-4.254048	73.62	-4.189558	73.6	-3.710417	73.6	-3.845878	73.6	-3.88706	73.6	-3.864564	73.6	-3.888802	73.6	-3.886	73.6	-3.86235	73.6	-3.824323
73.81	-4.085287	73.81	-4.158739	73.81	-4.155003	73.81	-4.153037	73.81	-4.122741	73.81	-4.204041	73.81	-4.272125	73.81	-4.203216	73.8	-3.717316	73.8	-3.848693	73.8	-3.892175	73.8	-3.870702	73.8	-3.896173	73.8	-3.894645	73.8	-3.866723	73.8	-3.829111
74.01	-4.091117	74.01	-4.165554	74.01	-4.160741	74.01	-4.164051	74.01	-4.13094	74.01	-4.211874	74.01	-4.276176	74.01	-4.211555	74	-3.722623	74	-3.860563	74	-3.903363	74	-3.882175	74	-3.906431	74	-3.897416	74	-3.876258	74	-3.839863
74.21	-4.099954	74.21	-4.174292	74.21	-4.176719	74.21	-4.172056	74.21	-4.138053	74.21	-4.227169	74.21	-4.284052	74.21	-4.220673	74.2	-3.733881	74.2	-3.87121	74.2	-3.907412	74.2	-3.890932	74.2	-3.91107	74.2	-3.909538	74.2	-3.884492	74.2	-3.854141
74.41	-4.112464	74.41	-4.185611	74.41	-4.180687	74.41	-4.181584	74.41	-4.14757	74.41	-4.232308	74.41	-4.293826	74.41	-4.227733	74.4	-3.738247	74.4	-3.873627	74.4	-3.913363	74.4	-3.894604	74.4	-3.921797	74.4	-3.91156	74.4	-3.893851	74.4	-3.850313
74.61	-4.115898	74.61	-4.192725	74.61	-4.187864	74.61	-4.188546	74.61	-4.156858	74.61	-4.238048	74.61	-4.298292	74.61	-4.23832	74.6	-3.743695	74.6	-3.880214	74.6	-3.923779	74.6	-3.902611	74.6	-3.92638	74.6	-3.920467	74.6	-3.893499	74.6	-3.862715
74.81	-4.119514	74.81	-4.201016	74.81	-4.196865	74.81	-4.195319	74.81	-4.158757	74.81	-4.242965	74.81	-4.306706	74.81	-4.242055	74.8	-3.74845	74.8	-3.884854	74.8	-3.928097	74.8	-3.903557	74.8	-3.927433	74.8	-3.923425	74.8	-3.898483	74.8	-3.869578
75.01	-0.5372582	75.01	-0.5343972	75.01	-0.4611353	75.01	-0.4434076	75.01	-0.4742646	75.01	-0.5278015	75.01	-0.5181546	75.01	-0.5058206	75	-0.4681063	75	-0.5027661	75	-0.5082149	75	-0.4863404	75	-0.4831623	75	-0.4859756	75	-0.4789227	75	-0.4418716
75.21	-0.5106338	75.21	-0.500957	75.21	-0.4380992	75.21	-0.4166938	75.21	-0.4415681	75.21	-0.5030834	75.21	-0.4967119	75.21	-0.4744863	75.2	-0.4504062	75.2	-0.48559	75.2	-0.4812281	75.2	-0.4795297	75.2	-0.4779678	75.2	-0.4767642	75.2	-0.4689941	75.2	-0.4126836
75.41	-0.4842437	75.41	-0.4729272	75.41	-0.410597	75.41	-0.3866902	75.41	-0.4234045	75.41	-0.4746984	75.41	-0.4735957	75.41	-0.4453931	75.4	-0.4256586	75.4	-0.4601956	75.4	-0.455052	75.4	-0.4518529	75.4	-0.4534505	75.4	-0.4575029	75.4	-0.4405745	75.4	-0.3873347
75.61	-0.4614552	75.61	-0.4485343	75.61	-0.3857777	75.61	-0.3653176	75.61	-0.3962947	75.61	-0.441524	75.61	-0.4450139	75.61	-0.424496	75.6	-0.4072002	75.6	-0.4301608	75.6	-0.4337518	75.6	-0.4346416	75.6	-0.4304365	75.6	-0.4279964	75.6	-0.4131853	75.6	-0.369644
75.81	-0.4388261	75.81	-0.4254158	75.81	-0.3686943	75.81	-0.3473749	75.81	-0.3813433	75.81	-0.4276694	75.81	-0.4248382	75.81	-0.4078135	75.8	-0.388487	75.8	-0.4164855	75.8	-0.4173102	75.8	-0.4147688	75.8	-0.415424	75.8	-0.4088876	75.8	-0.3950856	75.8	-0.3498654
76.01	-0.4231711	76.01	-0.4122738	76.01	-0.3544651	76.01	-0.3249276	76.01	-0.3597359	76.01	-0.4106364	76.01	-0.4040874	76.01	-0.3889621	76	-0.3770638	76	-0.4069161	76	-0.3987949	76	-0.4025044	76	-0.3984158	76	-0.3924724	76	-0.3834984	76	-0.338425
76.21	-0.4058593	76.21	-0.3964706	76.21	-0.3378981	76.21	-0.3165822	76.21	-0.3472448	76.21	-0.3952569	76.21	-0.3884018	76.21	-0.3755702	76.2	-0.3632133	76.2	-0.3897403	76.2	-0.3876046	76.2	-0.3875801	76.2	-0.386194	76.2	-0.3803276	76.2	-0.3697572	76.2	-0.3241119
76.41	-0.397485	76.41	-0.384315	76.41	-0.3260559	76.41	-0.3025179	76.41	-0.3380045	76.41	-0.3828636	76.41	-0.3818654	76.41	-0.3648101	76.4	-0.3555105	76.4	-0.380293	76.4	-0.3742702	76.4	-0.3747028	76.4	-0.3723682	76.4	-0.3679335	76.4	-0.3570094	76.4	-0.3123954
76.61	-0.3862976	76.61	-0.3713515	76.61	-0.3173544	76.61	-0.2846956	76.61	-0.3291963	76.61	-0.3712648	76.61	-0.3628539	76.61	-0.3547448	76.6	-0.3428065	76.6	-0.3682646	76.6	-0.3694851	76.6	-0.3615738	76.6	-0.369348	76.6	-0.3602418	76.6	-0.3457814	76.6	-0.3005658
76.81	-0.3753557	76.81	-0.3665714	76.81	-0.3057419	76.81	-0.2839962	76.81	-0.3205652	76.81	-0.3616586	76.81	-0.3581675	76.81	-0.3443387	76.8	-0.337304	76.8	-0.3644065	76.8	-0.3576163	76.8	-0.3525113	76.8	-0.3577566	76.8	-0.350696	76.8	-0.3371773	76.8	-0.2950352
77.01	-0.3650861	77.01	-0.352135	77.01	-0.3012751	77.01	-0.2711903	77.01	-0.3087978	77.01	-0.34999	77.01	-0.3436178	77.01	-0.3406499	77	-0.3262649	77	-0.3540187	77	-0.351927	77	-0.3468447	77	-0.3495649	77	-0.3455773	77	-0.3324163	77	-0.2853712
77.21	-0.3570723	77.21	-0.3468646	77.21	-0.2900075	77.21	-0.2628591	77.21	-0.3076556	77.21	-0.343824	77.21	-0.3363859	77.21	-0.330582	77.2	-0.332116	77.2	-0.3537783	77.2	-0.3447495	77.2	-0.340045	77.2	-0.3397002	77.2	-0.3350439	77.2	-0.3235742	77.2	-0.2807293
77.41	-0.3551254	77.41	-0.3371504	77.41	-0.2812769	77.41	-0.2531006	77.41	-0.2945735	77.41	-0.3326045	77.41	-0.3315703	77.41	-0.3258895	77.4	-0.3151352	77.4	-0.3453784	77.4	-0.3388446	77.4	-0.3368866	77.4	-0.3371842	77.4	-0.3337924	77.4	-0.3205599	77.4	-0.2746767
77.61	-0.3486252	77.61	-0.3329431	77.61	-0.2784237	77.61	-0.2486493	77.61	-0.2926874	77.61	-0.3271438	77.61	-0.3204386	77.61	-0.3164714	77.6	-0.3079747	77.6	-0.3422501	77.6	-0.3340449	77.6	-0.3310946	77.6	-0.3309889	77.6	-0.3238754	77.6	-0.3162529	77.6	-0.2736844
77.81	-0.3382332	77.81	-0.3226073	77.81	-0.2709213	77.81	-0.2463516	77.81	-0.2852565	77.81	-0.3217221	77.81	-0.3170898	77.81	-0.3096131	77.8	-0.3086464	77.8	-0.3340098	77.8	-0.3224483	77.8	-0.3296277	77.8	-0.3259073	77.8	-0.3170066	77.8	-0.3076716	77.8	-0.270762
78.01	-0.3375368	78.01	-0.319216	78.01	-0.2675138	78.01	-0.2395976	78.01	-0.2779717	78.01	-0.3170049	78.01	-0.310029	78.01	-0.3008863	78	-0.301993	78	-0.331577	78	-0.3202441	78	-0.3214427	78	-0.3150302	78	-0.3126683	78	-0.3071692	78	-0.2666155
78.21	-0.3295312	78.21	-0.3138386	78.21	-0.2615747	78.21	-0.2305454	78.21	-0.2740739	78.21	-0.3139875	78.21	-0.3078486	78.21	-0.3005881	78.2	-0.2960698	78.2	-0.3265663	78.2	-0.3216362	78.2	-0.3175183	78.2	-0.314463	78.2	-0.3087117	78.2	-0.2966187	78.2	-0.2615127
78.41	-0.3260646	78.41	-0.3062463	78.41	-0.2556824	78.41	-0.2306261	78.41	-0.2650834	78.41	-0.3067942	78.41	-0.3003047	78.41	-0.2939469	78.4	-0.2930714	78.4	-0.3235054	78.4	-0.3154415	78.4	-0.3146358	78.4	-0.3113059	78.4	-0.3063529	78.4	-0.2974421	78.4	-0.2559076
78.61	-0.3238024	78.61	-0.3000111	78.61	-0.2530269	78.61	-0.2224029	78.61	-0.2625753	78.61	-0.3036585	78.61	-0.2908595	78.61	-0.2894407	78.6	-0.2903092	78.6	-0.3174949	78.6	-0.3129958	78.6	-0.3113472	78.6	-0.3117583	78.6	-0.3015918	78.6	-0.2886286	78.6	-0.2513134
78.81	-0.3153999	78.81	-0.3015393	78.81	-0.2488656	78.81	-0.2178199	78.81	-0.2626299	78.81	-0.2963052	78.81	-0.2911608	78.81	-0.2837258	78.8	-0.2878129	78.8	-0.3168983	78.8	-0.3094655	78.8	-0.3041859	78.8	-0.305434	78.8	-0.2981365	78.8	-0.2843797	78.8	-0.249266
79.01	-0.3117261	79.01	-0.294164	79.01	-0.2450162	79.01	-0.2153585	79.01	-0.2583428	79.01	-0.2920867	79.01	-0.284843	79.01	-0.2778719	79	-0.2859691	79	-0.3118761	79	-0.3010535	79	-0.2988938	79	-0.3036933	79	-0.2957866	79	-0.2855	79	-0.2444417
79.21	-0.3094195	79.21	-0.2913912	79.21	-0.2417693	79.21	-0.2082288	79.21	-0.2540252	79.21	-0.2868661	79.21	-0.2802214	79.21	-0.2769363	79.2	-0.2777421	79.2	-0.3044033	79.2	-0.3066692	79.2	-0.29665	79.2	-0.3007777	79.2	-0.2930425	79.2	-0.2741824	79.2	-0.2428679
79.41	-0.3045638	79.41	-0.2919503	79.41	-0.2346811	79.41	-0.2028084	79.41	-0.2516063	79.41	-0.2828228	79.41	-0.2725525	79.41	-0.2687711	79.4	-0.2767264	79.4	-0.3070407	79.4	-0.2988906	79.4	-0.2967117	79.4	-0.293634	79.4	-0.288002	79.4	-0.2772633	79.4	-0.2369664
79.61	-0.3004374	79.61	-0.2823314	79.61	-0.2318264	79.61	-0.2029423	79.61	-0.2440899	79.61	-0.2798653	79.61	-0.2728698	79.61	-0.2707257	79.6	-0.2819476	79.6	-0.2988047	79.6	-0.2963333	79.6	-0.2880985	79.6	-0.2929568	79.6	-0.2850068	79.6	-0.2724209	79.6	-0.2367559
79.81	-0.3009634	79.81	-0.2832249	79.81	-0.2305232	79.81	-0.1997508	79.81	-0.2415235	79.81	-0.278928	79.81	-0.2714009	79.81	-0.26816	79.8	-0.2722674	79.8	-0.300849	79.8	-0.2926142	79.8	-0.2882695	79.8	-0.2904404	79.8	-0.2847507	79.8	-0.2750469	79.8	-0.2341079
80.01	-3.465537	80.01	-3.541932	80.01	-3.564165	80.01	-3.527797	80.01	-3.484141	80.01	-3.591789	80.01	-3.614481	80.01	-3.554009	80	-3.191105	80	-3.339902	80	-3.397043	80	-3.361778	80	-3.336652	80	-3.379413	80	-3.42657	80	-3.283217
80.21	-3.660398	80.21	-3.746553	80.21	-3.730669	80.21	-3.720334	80.21	-3.69792	80.21	-3.774518	80.21	-3.83011	80.21	-3.74189	80.2	-3.377378	80.2	-3.525564	80.2	-3.563072	80.2	-3.543232	80.2	-3.549566	80.2	-3.559202	80.2	-3.561968	80.2	-3.480233
80.41	-3.748665	80.41	-3.829159	80.41	-3.816552	80.41	-3.809784	80.41	-3.789491	80.41	-3.85802	80.41	-3.919318	80.41	-3.829041	80.4	-3.452537	80.4	-3.605602	80.4	-3.635799	80.4	-3.617351	80.4	-3.627769	80.4	-3.631347	80.4	-3.618087	80.4	-3.563758
80.62	-3.809385	80.62	-3.894199	80.62	-3.873972	80.62	-3.871773	80.62	-3.845398	80.62	-3.922164	80.62	-3.98181	80.62	-3.892359	80.6	-3.505786	80.6	-3.650116	80.6	-3.684994	80.6	-3.659627	80.6	-3.671159	80.6	-3.681016	80.6	-3.654491	80.6	-3.608894
80.81	-3.84756	80.81	-3.928626	80.81	-3.914586	80.81	-3.912946	80.81	-3.885683	80.81	-3.96556	80.81	-4.024399	80.81	-3.933016	80.8	-3.533042	80.8	-3.680599	80.8	-3.715752	80.8	-3.698409	80.8	-3.71347	80.8	-3.705809	80.8	-3.691562	80.8	-3.644253
81.01	-3.882192	81.01	-3.960604	81.01	-3.950706	81.01	-3.944906	81.01	-3.916438	81.01	-3.993977	81.01	-4.056289	81.01	-3.969512	81	-3.566266	81	-3.707064	81	-3.743621	81	-3.724218	81	-3.736735	81	-3.735638	81	-3.71855	81	-3.671431
81.21	-3.906237	81.21	-3.991011	81.21	-3.973415	81.21	-3.969421	81.21	-3.947336	81.21	-4.025007	81.21	-4.080379	81.21	-3.990386	81.2	-3.587587	81.2	-3.729815	81.2	-3.76582	81.2	-3.748216	81.2	-3.763074	81.2	-3.762685	81.2	-3.738237	81.2	-3.699093
81.41	-3.929253	81.41	-4.020243	81.41	-4.000496	81.41	-3.993629	81.41	-3.971561	81.41	-4.047623	81.41	-4.107304	81.41	-4.02394	81.41	-3.607988	81.41	-3.751747	81.41	-3.781685	81.41	-3.767967	81.41	-3.783053	81.41	-3.77903	81.41	-3.75762	81.41	-3.712712
81.61	-3.950742	81.61	-4.04001	81.61	-4.017137	81.61	-4.010788	81.61	-3.992254	81.61	-4.065777	81.61	-4.130398	81.61	-4.040157	81.6	-3.619958	81.6	-3.77162	81.6	-3.799923	81.6	-3.781849	81.6	-3.800689	81.6	-3.789225	81.6	-3.777647	81.6	-3.737004
81.81	-3.969213	81.81	-4.056273	81.81	-4.041837	81.81	-4.029649	81.81	-4.0048	81.81	-4.086874	81.81	-4.150118	81.81	-4.060154	81.8	-3.637796	81.8	-3.777784	81.8	-3.819063	81.8	-3.798995	81.8	-3.814848	81.8	-3.811571	81.8	-3.789752	81.8	-3.74927
82.01	-3.984352	82.01	-4.073893	82.01	-4.053065	82.01	-4.052498	82.01	-4.021764	82.01	-4.103468	82.01	-4.164906	82.01	-4.076729	82	-3.649195	82	-3.796131	82	-3.830015	82	-3.808545	82	-3.82998	82	-3.826451	82	-3.80049	82	-3.75927
82.21	-3.999091	82.21	-4.087789	82.21	-4.066914	82.21	-4.065289	82.21	-4.039747	82.21	-4.120002	82.21	-4.182975	82.21	-4.090931	82.2	-3.65982	82.2	-3.811517	82.2	-3.84071	82.2	-3.823348	82.2	-3.840997	82.2	-3.83669	82.2	-3.813888	82.2	-3.773484
82.41	-4.015016	82.41	-4.107129	82.41	-4.084755	82.41	-4.07873	82.41	-4.052461	82.41	-4.133358	82.41	-4.189134	82.41	-4.104293	82.4	-3.672014	82.4	-3.819632	82.4	-3.857886	82.4	-3.836385	82.4	-3.854106	82.4	-3.849734	82.4	-3.822644	82.4	-3.784176
82.61	-4.027692	82.61	-4.113993	82.61	-4.093904	82.61	-4.091088	82.61	-4.063561	82.61	-4.145302	82.61	-4.206503	82.61	-4.113684	82.6	-3.681668	82.6	-3.825013	82.6	-3.861585	82.6	-3.842705	82.6	-3.858959	82.6	-3.860452	82.6	-3.830852	82.6	-3.797686
82.81	-4.0376	82.81	-4.126547	82.81	-4.104856	82.81	-4.108962	82.81	-4.081471	82.81	-4.155863	82.81	-4.217396	82.81	-4.125127	82.8	-3.690903	82.8	-3.837192	82.8	-3.869741	82.8	-3.858332	82.8	-3.873283	82.8	-3.861704	82.8	-3.839703	82.8	-3.803624
83.01	-4.045389	83.01	-4.13902	83.01	-4.118816	83.01	-4.111196	83.01	-4.087764	83.01	-4.173578	83.01	-4.228655	83.01	-4.142066	83	-3.700815	83	-3.847976	83	-3.882446	83	-3.867463	83	-3.885383	83	-3.875778	83	-3.849305	83	-3.817765
83.21	-4.059824	83.21	-4.147406	83.21	-4.130325	83.21	-4.129432	83.21	-4.101128	83.21	-4.183238	83.21	-4.243335	83.21	-4.153034	83.2	-3.710262	83.2	-3.85944	83.2	-3.889651	83.2	-3.875573	83.2	-3.894247	83.2	-3.882631	83.2	-3.86256	83.2	-3.825744
83.41	-4.064871	83.41	-4.158939	83.41	-4.134223	83.41	-4.139977	83.41	-4.107215	83.41	-4.187754	83.41	-4.249278	83.41	-4.161906	83.4	-3.718606	83.4	-3.860439	83.4	-3.899335	83.4	-3.881459	83.4	-3.905293	83.4	-3.890815	83.4	-3.866904	83.4	-3.835252
83.61	-4.078744	83.61	-4.164339	83.61	-4.146917	83.61	-4.146727	83.61	-4.117015	83.61	-4.203978	83.61	-4.254582	83.61	-4.173844	83.6	-3.722934	83.6	-3.875178	83.6	-3.912117	83.6	-3.888181	83.6	-3.905328	83.6	-3.898928	83.6	-3.873059	83.6	-3.83993
83.81	-4.086388	83.81	-4.174465	83.81	-4.154613	83.81	-4.151891	83.81	-4.128174	83.81	-4.205826	83.81	-4.269104	83.81	-4.183977	83.8	-3.732572	83.8	-3.879752	83.8	-3.915398	83.8	-3.895725	83.8	-3.913342	83.8	-3.907915	83.8	-3.875847	83.8	-3.847806
84.01	-4.098455	84.01	-4.184605	84.01	-4.163915	84.01	-4.160384	84.01	-4.132082	84.01	-4.21294	84.01	-4.2818	84.01	-4.186563	84	-3.738277	84	-3.88711	84	-3.915651	84	-3.90111	84	-3.923862	84	-3.911074	84	-3.884867	84	-3.852897
84.21	-4.103796	84.21	-4.190912	84.21	-4.167675	84.21	-4.166597	84.21	-4.140278	84.21	-4.226559	84.21	-4.277442	84.21	-4.202651	84.2	-3.745024	84.2	-3.891955	84.2	-3.9293	84.2	-3.909084	84.2	-3.927183	84.2	-3.921037	84.2	-3.892324	84.2	-3.861033
84.41	-4.110521	84.41	-4.198921	84.41	-4.178207	84.41	-4.179097	84.41	-4.148578	84.41	-4.234919	84.41	-4.290148	84.41	-4.201736	84.4	-3.750832	84.4	-3.896876	84.4	-3.930532	84.4	-3.911519	84.4	-3.936158	84.4	-3.92474	84.4	-3.900194	84.4	-3.86297
84.61	-4.114773	84.61	-4.201078	84.61	-4.185198	84.61	-4.185013	84.61	-4.155569	84.61	-4.239698	84.61	-4.298171	84.61	-4.210143	84.6	-3.755627	84.6	-3.903519	84.6	-3.936099	84.6	-3.913289	84.6	-3.939761	84.6	-3.933349	84.6	-3.903998	84.6	-3.871004
84.81	-4.120633	84.81	-4.206526	84.81	-4.188428	84.81	-4.186702	84.81	-4.160707	84.81	-4.241611	84.81	-4.30096	84.81	-4.214225	84.8	-3.758945	84.8	-3.908928	84.8	-3.937811	84.8	-3.922903	84.8	-3.942299	84.8	-3.932145	84.8	-3.908446	84.8	-3.869093
85.01	-0.5062068	85.01	-0.5025452	85.01	-0.4231199	85.01	-0.3959874	85.01	-0.4365646	85.01	-0.4903254	85.01	-0.4689542	85.01	-0.447455	85	-0.4337999	85	-0.4903362	85	-0.4820285	85	-0.4635556	85	-0.457825	85	-0.4656505	85	-0.4418123	85	-0.4123729
85.21	-0.4803883	85.21	-0.4863332	85.21	-0.395946	85.21	-0.3737693	85.21	-0.4110746	85.21	-0.4705864	85.21	-0.4699888	85.21	-0.4169602	85.2	-0.4298755	85.2	-0.4771926	85.2	-0.4600586	85.2	-0.4595536	85.2	-0.4484058	85.2	-0.4455888	85.2	-0.4343191	85.2	-0.3877592
85.41	-0.4534217	85.41	-0.4527896	85.41	-0.3741932	85.41	-0.342517	85.41	-0.3855096	85.41	-0.4386831	85.41	-0.4408011	85.41	-0.3911224	85.4	-0.4072789	85.4	-0.4489767	85.4	-0.4304689	85.4	-0.4300711	85.4	-0.4270333	85.4	-0.4163185	85.4	-0.4049128	85.4	-0.3597765
85.61	-0.4244111	85.61	-0.4293977	85.61	-0.348592	85.61	-0.3248343	85.61	-0.3594941	85.61	-0.4106741	85.61	-0.4087535	85.61	-0.3671815	85.6	-0.3837129	85.6	-0.4244385	85.6	-0.4117462	85.6	-0.4113108	85.6	-0.4054908	85.6	-0.391125	85.6	-0.3829302	85.6	-0.3347239
85.81	-0.4067736	85.81	-0.4075214	85.81	-0.3310026	85.81	-0.302388	85.81	-0.3450077	85.81	-0.387985	85.81	-0.3900639	85.81	-0.3471863	85.8	-0.3681524	85.8	-0.4056234	85.8	-0.3913051	85.8	-0.3886839	85.8	-0.3848082	85.8	-0.370517	85.8	-0.365715	85.8	-0.3185772
86.01	-0.3926196	86.01	-0.39029	86.01	-0.3160253	86.01	-0.2861814	86.01	-0.3315502	86.01	-0.3740979	86.01	-0.3737235	86.01	-0.327544	86	-0.3549288	86	-0.3922875	86	-0.3704047	86	-0.370998	86	-0.3704413	86	-0.362886	86	-0.3456687	86	-0.3005246
86.21	-0.3753493	86.21	-0.3781287	86.21	-0.3025832	86.21	-0.2730867	86.21	-0.315779	86.21	-0.3606782	86.21	-0.3594172	86.21	-0.3192855	86.2	-0.339054	86.2	-0.3743288	86.2	-0.3622695	86.2	-0.3621715	86.2	-0.3578869	86.2	-0.3475627	86.2	-0.3343515	86.2	-0.2881961
86.41	-0.3672257	86.41	-0.3582007	86.41	-0.2926672	86.41	-0.2634624	86.41	-0.3065264	86.41	-0.3430964	86.41	-0.3432618	86.41	-0.3071395	86.4	-0.3276036	86.4	-0.366394	86.4	-0.3501711	86.4	-0.3482139	86.4	-0.3439545	86.4	-0.3324465	86.4	-0.323052	86.4	-0.279265
86.61	-0.3538837	86.61	-0.3518803	86.61	-0.2797647	86.61	-0.2485442	86.61	-0.2931511	86.61	-0.3339387	86.61	-0.3320048	86.61	-0.2948305	86.6	-0.3169358	86.6	-0.3564234	86.6	-0.3352107	86.6	-0.3374453	86.6	-0.3362244	86.6	-0.3301366	86.6	-0.3098711	86.6	-0.2665428
86.81	-0.3426101	86.81	-0.3390702	86.81	-0.2708579	86.81	-0.2364702	86.81	-0.2851855	86.81	-0.3255566	86.81	-0.3200284	86.81	-0.2854107	86.8	-0.3111745	86.8	-0.3493602	86.8	-0.3313427	86.8	-0.3299842	86.8	-0.3266189	86.8	-0.3162089	86.8	-0.3039491	86.8	-0.2626913
87.01	-0.334337	87.01	-0.3297507	87.01	-0.2653498	87.01	-0.2316187	87.01	-0.2785538	87.01	-0.3169986	87.01	-0.3100815	87.01	-0.282258	87	-0.3080895	87	-0.3410358	87	-0.3282467	87	-0.3226916	87	-0.3183282	87	-0.3077008	87	-0.2940441	87	-0.252171
87.21	-0.3276865	87.21	-0.3215431	87.21	-0.2521936	87.21	-0.2229176	87.21	-0.2741497	87.21	-0.3094223	87.21	-0.3008583	87.21	-0.2723151	87.2	-0.2910585	87.2	-0.3353329	87.2	-0.3149392	87.2	-0.3177509	87.2	-0.3130541	87.2	-0.3059886	87.2	-0.2944905	87.2	-0.2496648
87.41	-0.3256621	87.41	-0.3146084	87.41	-0.2452255	87.41	-0.220974	87.41	-0.2611167	87.41	-0.297877	87.41	-0.2945438	87.41	-0.261828	87.4	-0.2884918	87.4	-0.3289484	87.4	-0.3112675	87.4	-0.306071	87.4	-0.3061484	87.4	-0.3000706	87.4	-0.2813304	87.4	-0.2349606
87.61	-0.3161905	87.61	-0.3103553	87.61	-0.2405531	87.61	-0.2117718	87.61	-0.2573511	87.61	-0.2960776	87.61	-0.2905789	87.61	-0.2579294	87.6	-0.2834851	87.6	-0.3268756	87.6	-0.3046583	87.6	-0.307141	87.6	-0.2951214	87.6	-0.2918423	87.6	-0.2731493	87.6	-0.2378554
87.81	-0.313123	87.81	-0.3057873	87.81	-0.2297584	87.81	-0.2038136	87.81	-0.2530967	87.81	-0.2888704	87.81	-0.2790116	87.81	-0.2488346	87.8	-0.2767823	87.8	-0.315711	87.8	-0.2992687	87.8	-0.301591	87.8	-0.2915078	87.8	-0.2878276	87.8	-0.2748364	87.8	-0.2325179
88.01	-0.3018421	88.01	-0.3008319	88.01	-0.2267074	88.01	-0.1968161	88.01	-0.2468966	88.01	-0.2800717	88.01	-0.2768953	88.01	-0.2473017	88	-0.2770178	88	-0.3109857	88	-0.2983542	88	-0.2945773	88	-0.2921729	88	-0.2837107	88	-0.2677837	88	-0.2222642
88.21	-0.2994248	88.21	-0.2923614	88.21	-0.2244985	88.21	-0.1939379	88.21	-0.2388681	88.21	-0.2764169	88.21	-0.2705025	88.21	-0.2433411	88.2	-0.2676996	88.2	-0.3098114	88.2	-0.2913268	88.2	-0.286823	88.2	-0.2903492	88.2	-0.2779447	88.2	-0.2633167	88.2	-0.2208855
88.41	-0.2986541	88.41	-0.2884974	88.41	-0.2171651	88.41	-0.1851069	88.41	-0.2369025	88.41	-0.2692199	88.41	-0.2654898	88.41	-0.2374932	88.4	-0.2650373	88.4	-0.3024113	88.4	-0.293264	88.4	-0.2839154	88.4	-0.2878379	88.4	-0.2686372	88.4	-0.2597311	88.4	-0.2207263
88.61	-0.2897308	88.61	-0.2834616	88.61	-0.2157825	88.61	-0.1802461	88.61	-0.2300041	88.61	-0.2679241	88.61	-0.2630971	88.61	-0.2307465	88.6	-0.2630734	88.6	-0.3013901	88.6	-0.2820261	88.6	-0.2792897	88.6	-0.2817999	88.6	-0.2678715	88.6	-0.253738	88.6	-0.2154305
88.81	-0.2870026	88.81	-0.277089	88.81	-0.2081898	88.81	-0.1787484	88.81	-0.2261385	88.81	-0.2605164	88.81	-0.2546662	88.81	-0.2267882	88.8	-0.2606466	88.8	-0.2995323	88.8	-0.2821182	88.8	-0.2785878	88.8	-0.2771012	88.8	-0.2632776	88.8	-0.2524576	88.8	-0.2136237
89.01	-0.2850156	89.01	-0.2761859	89.01	-0.2071835	89.01	-0.1724208	89.01	-0.2218233	89.01	-0.2573231	89.01	-0.249515	89.01	-0.2216413	89.01	-0.2540338	89.01	-0.2954775	89.01	-0.2783377	89.01	-0.2759898	89.01	-0.2714872	89.01	-0.2591504	89.01	-0.2460174	89.01	-0.215881
89.21	-0.2774262	89.21	-0.2680854	89.21	-0.2002093	89.21	-0.1666883	89.21	-0.2168682	89.21	-0.2540392	89.21	-0.2406294	89.21	-0.2160683	89.2	-0.2536262	89.2	-0.2929759	89.2	-0.2734406	89.2	-0.2742248	89.2	-0.2671014	89.2	-0.2552335	89.2	-0.2437327	89.2	-0.2027299
89.41	-0.2744554	89.41	-0.2655601	89.41	-0.1960926	89.41	-0.1656398	89.41	-0.213831	89.41	-0.2512618	89.41	-0.2392952	89.41	-0.2132757	89.4	-0.251727	89.4	-0.2868251	89.4	-0.2710721	89.4	-0.2716649	89.4	-0.264819	89.4	-0.2556929	89.4	-0.2358898	89.4	-0.2041898
89.61	-0.270301	89.61	-0.2665392	89.61	-0.1945192	89.61	-0.1647529	89.61	-0.2141016	89.61	-0.2439633	89.61	-0.2361348	89.61	-0.2110732	89.6	-0.2481477	89.6	-0.2861574	89.6	-0.26751	89.6	-0.2659727	89.6	-0.264671	89.6	-0.2524269	89.6	-0.2363848	89.6	-0.2051734
89.81	-0.2679449	89.81	-0.2607298	89.81	-0.1925309	89.81	-0.1590037	89.81	-0.2078067	89.81	-0.2423863	89.81	-0.2309448	89.81	-0.2114369	89.8	-0.2434166	89.8	-0.2853057	89.8	-0.2664423	89.8	-0.2650709	89.8	-0.2618958	89.8	-0.2502151	89.8	-0.2372461	89.8	-0.1996512
90.01	-0.2242274	90.01	-0.2078278	90.01	-0.1410135	90.01	-0.1035611	90.01	-0.1555198	90.01	-0.1805679	90.01	-0.1724269	90.01	-0.1530544	90	-0.2186378	90	-0.2619726	90	-0.2381076	90	-0.2432266	90	-0.2361394	90	-0.2246084	90	-0.2109071	90	-0.1741524
90.21	-0.2150158	90.21	-0.2097755	90.21	-0.1393373	90.21	-0.09981984	90.21	-0.1512928	90.21	-0.1798885	90.21	-0.1722628	90.21	-0.152476	90.2	-0.2266885	90.2	-0.2585426	90.2	-0.2383457	90.2	-0.2385639	90.2	-0.2340674	90.2	-0.2227991	90.2	-0.2095089	90.2	-0.1721653
90.41	-0.2172946	90.41	-0.1987641	90.41	-0.1392545	90.41	-0.09846119	90.41	-0.1493084	90.41	-0.1824601	90.41	-0.1665836	90.41	-0.1500525	90.39	-0.2203403	90.39	-0.2532225	90.39	-0.242448	90.39	-0.2427052	90.39	-0.2372283	90.39	-0.2212737	90.39	-0.2049831	90.39	-0.167871
90.61	-0.2115398	90.61	-0.199448	90.61	-0.1347731	90.61	-0.09933425	90.61	-0.1461703	90.61	-0.1782139	90.61	-0.165962	90.61	-0.1426098	90.59	-0.2243021	90.59	-0.2551683	90.59	-0.2343953	90.59	-0.2362211	90.59	-0.2350659	90.59	-0.2220889	90.59	-0.207507	90.59	-0.1683607
90.81	-0.2121305	90.81	-0.1989867	90.81	-0.133768	90.81	-0.0922849	90.81	-0.147443	90.81	-0.1762398	90.81	-0.1641948	90.81	-0.1425033	90.8	-0.2179669	90.8	-0.2487439	90.8	-0.2380833	90.8	-0.2338564	90.8	-0.2281069	90.8	-0.223132	90.8	-0.2031772	90.8	-0.1642613
91.01	-0.2110651	91.01	-0.1999258	91.01	-0.1322378	91.01	-0.09352127	91.01	-0.1418708	91.01	-0.1740832	91.01	-0.1653381	91.01	-0.140708	90.99	-0.2105463	90.99	-0.2515977	90.99	-0.2333437	90.99	-0.2366556	90.99	-0.2295182	90.99	-0.2200138	90.99	-0.2045856	90.99	-0.1625368
91.21	-0.2064709	91.21	-0.1920645	91.21	-0.1231503	91.21	-0.09269229	91.21	-0.1429734	91.21	-0.1740668	91.21	-0.1623091	91.21	-0.1371828	91.2	-0.2143221	91.2	-0.2477573	91.2	-0.2305133	91.2	-0.2309154	91.2	-0.2272263	91.2	-0.2151171	91.2	-0.2010252	91.2	-0.163604
91.41	-0.2029622	91.41	-0.1936561	91.41	-0.1261364	91.41	-0.08984766	91.41	-0.1409254	91.41	-0.1720859	91.41	-0.1600968	91.41	-0.1384463	91.4	-0.2120197	91.4	-0.249092	91.4	-0.2304918	91.4	-0.228848	91.4	-0.2245392	91.4	-0.2134465	91.4	-0.1998952	91.4	-0.1633828
91.61	-0.2024811	91.61	-0.1913553	91.61	-0.1219553	91.61	-0.08906385	91.61	-0.1371542	91.61	-0.1686458	91.61	-0.1612754	91.61	-0.1355215	91.59	-0.2143197	91.59	-0.2443866	91.59	-0.2328644	91.59	-0.2276539	91.59	-0.2256948	91.59	-0.2170841	91.59	-0.1995336	91.59	-0.1602075
91.81	-0.2063085	91.81	-0.1892456	91.81	-0.1218176	91.81	-0.08863119	91.81	-0.14101	91.81	-0.1662342	91.81	-0.1579964	91.81	-0.1348462	91.8	-0.2131602	91.8	-0.2461355	91.8	-0.2255784	91.8	-0.2241641	91.8	-0.2235472	91.8	-0.2098977	91.8	-0.1976608	91.8	-0.1586191
92.01	-0.2031562	92.01	-0.1854095	92.01	-0.1236244	92.01	-0.0863424	92.01	-0.1364209	92.01	-0.1644083	92.01	-0.1525911	92.01	-0.137806	91.99	-0.2092334	91.99	-0.2444662	91.99	-0.22547	91.99	-0.2280056	91.99	-0.2157147	91.99	-0.2087791	91.99	-0.1981645	91.99	-0.1606104
92.21	-0.1974916	92.21	-0.1912848	92.21	-0.1209828	92.21	-0.0865681	92.21	-0.136965	92.21	-0.1642621	92.21	-0.1534331	92.21	-0.1280071	92.19	-0.2035327	92.19	-0.2454763	92.19	-0.2262865	92.19	-0.2280716	92.19	-0.225319	92.19	-0.2106217	92.19	-0.1892031	92.19	-0.1589643
92.41	-0.1968074	92.41	-0.1833586	92.41	-0.1176761	92.41	-0.08660191	92.41	-0.1329578	92.41	-0.1670496	92.41	-0.150152	92.41	-0.1284528	92.4	-0.206073	92.4	-0.2429941	92.4	-0.223633	92.4	-0.2246671	92.4	-0.2192941	92.4	-0.2084732	92.4	-0.195712	92.4	-0.1554341
92.61	-0.1943575	92.61	-0.1819042	92.61	-0.1160311	92.61	-0.08287529	92.61	-0.133491	92.61	-0.1625113	92.61	-0.157732	92.61	-0.1317877	92.59	-0.2070046	92.59	-0.2399654	92.59	-0.2228229	92.59	-0.2286955	92.59	-0.2183338	92.59	-0.2060842	92.59	-0.1925352	92.59	-0.1516891
92.81	-0.1881409	92.81	-0.1788487	92.81	-0.1127447	92.81	-0.07996465	92.81	-0.1308528	92.81	-0.1604447	92.81	-0.1509947	92.81	-0.1306585	92.79	-0.2011525	92.79	-0.2368803	92.79	-0.2301351	92.79	-0.2202444	92.79	-0.2153829	92.79	-0.205485	92.79	-0.1931525	92.79	-0.1576967
93.01	-0.1936734	93.01	-0.180626	93.01	-0.116145	93.01	-0.07970678	93.01	-0.1304441	93.01	-0.1618173	93.01	-0.1479633	93.01	-0.1252937	93	-0.2061303	93	-0.2382213	93	-0.2186953	93	-0.2234595	93	-0.2173084	93	-0.2071947	93	-0.1887768	93	-0.1530175
93.21	-0.1960676	93.21	-0.1792333	93.21	-0.1118728	93.21	-0.07620496	93.21	-0.1289842	93.21	-0.1567663	93.21	-0.1491183	93.21	-0.1284037	93.2	-0.2016241	93.2	-0.2351979	93.2	-0.2227302	93.2	-0.2233146	93.2	-0.2125465	93.2	-0.200116	93.2	-0.1889109	93.2	-0.1527276
93.41	-0.1913418	93.41	-0.1794149	93.41	-0.1096189	93.41	-0.07161812	93.41	-0.1276729	93.41	-0.1576446	93.41	-0.1472278	93.41	-0.1291515	93.4	-0.2054483	93.4	-0.2419157	93.4	-0.2168498	93.4	-0.223177	93.4	-0.2141002	93.4	-0.205054	93.4	-0.1853646	93.4	-0.1465802
93.61	-0.186813	93.61	-0.1769316	93.61	-0.111919	93.61	-0.0726551	93.61	-0.1257911	93.61	-0.1574691	93.61	-0.1432521	93.61	-0.1277554	93.6	-0.2038299	93.6	-0.2382338	93.6	-0.2185296	93.6	-0.2218511	93.6	-0.2160377	93.6	-0.2065913	93.6	-0.1844174	93.6	-0.151584
93.81	-0.1857306	93.81	-0.1737897	93.81	-0.1081115	93.81	-0.07607376	93.81	-0.1256033	93.81	-0.1531218	93.81	-0.1428311	93.81	-0.1225139	93.8	-0.2011662	93.8	-0.2376171	93.8	-0.2192225	93.8	-0.2175739	93.8	-0.2141255	93.8	-0.1963127	93.8	-0.1882678	93.8	-0.148752
94.01	-0.1893078	94.01	-0.1709592	94.01	-0.1083518	94.01	-0.07314289	94.01	-0.1263452	94.01	-0.1539605	94.01	-0.1421601	94.01	-0.1208647	94	-0.1997387	94	-0.2349425	94	-0.2144207	94	-0.2213733	94	-0.2095092	94	-0.200663	94	-0.1868862	94	-0.1504858
94.21	-0.1809401	94.21	-0.1731207	94.21	-0.1100301	94.21	-0.07279194	94.21	-0.1227249	94.21	-0.1525685	94.21	-0.1398755	94.21	-0.1196317	94.2	-0.2009792	94.2	-0.2313035	94.2	-0.2186897	94.2	-0.2175419	94.2	-0.2157753	94.2	-0.2039476	94.2	-0.1863046	94.2	-0.1496769
94.41	-0.1844236	94.41	-0.1707638	94.41	-0.1065302	94.41	-0.07321046	94.41	-0.116352	94.41	-0.1527288	94.41	-0.1395674	94.41	-0.119147	94.4	-0.201252	94.4	-0.2324424	94.4	-0.2131286	94.4	-0.2150899	94.4	-0.2110536	94.4	-0.2022164	94.4	-0.1868042	94.4	-0.1455889
94.61	-0.1843343	94.61	-0.1704529	94.61	-0.1077929	94.61	-0.07337012	94.61	-0.1227835	94.61	-0.1488927	94.61	-0.1442719	94.61	-0.1216972	94.6	-0.1997792	94.6	-0.2292459	94.6	-0.2186912	94.6	-0.2153863	94.6	-0.2129334	94.6	-0.1992616	94.6	-0.1874928	94.6	-0.1446721
94.81	-0.1814976	94.81	-0.1722831	94.81	-0.1068512	94.81	-0.06890961	94.81	-0.1201934	94.81	-0.1461372	94.81	-0.1350751	94.81	-0.1170561	94.79	-0.1970723	94.79	-0.229791	94.79	-0.2159722	94.79	-0.2150985	94.79	-0.2122522	94.79	-0.2035025	94.79	-0.1824256	94.79	-0.1446611
95.01	-0.1796776	95.01	-0.171351	95.01	-0.1060929	95.01	-0.06841413	95.01	-0.1196204	95.01	-0.1449206	95.01	-0.1358703	95.01	-0.1162345	95	-0.1978699	95	-0.2304543	95	-0.211877	95	-0.2115065	95	-0.2069717	95	-0.2002431	95	-0.1843043	95	-0.1484686
95.21	-0.1765821	95.21	-0.1641242	95.21	-0.1043482	95.21	-0.0652533	95.21	-0.1138688	95.21	-0.1469466	95.21	-0.1380592	95.21	-0.1137723	95.2	-0.1965616	95.2	-0.232144	95.2	-0.2152684	95.2	-0.209602	95.2	-0.2097365	95.2	-0.1935399	95.2	-0.1782758	95.2	-0.1470163
95.41	-0.1790977	95.41	-0.1634979	95.41	-0.1010896	95.41	-0.06803684	95.41	-0.1171317	95.41	-0.1473416	95.41	-0.1324403	95.41	-0.1125337	95.39	-0.1981024	95.39	-0.2280126	95.39	-0.2130442	95.39	-0.2145251	95.39	-0.2105824	95.39	-0.1954896	95.39	-0.1776197	95.39	-0.1454364
95.61	-0.1781542	95.61	-0.1647889	95.61	-0.1027672	95.61	-0.06611438	95.61	-0.1142496	95.61	-0.1450356	95.61	-0.1333859	95.61	-0.1162952	95.59	-0.1954488	95.59	-0.22711	95.59	-0.2062123	95.59	-0.2155335	95.59	-0.2080999	95.59	-0.1956315	95.59	-0.1794505	95.59	-0.147925
95.81	-0.1754124	95.81	-0.1675948	95.81	-0.09906162	95.81	-0.06075059	95.81	-0.1169929	95.81	-0.1432768	95.81	-0.1317309	95.81	-0.1138195	95.79	-0.1949701	95.79	-0.2284717	95.79	-0.2111246	95.79	-0.2090787	95.79	-0.2065617	95.79	-0.1937906	95.79	-0.1785043	95.79	-0.1409833
96.01	-0.1744775	96.01	-0.1604646	96.01	-0.09268189	96.01	-0.05984739	96.01	-0.1129016	96.01	-0.1389734	96.01	-0.1341265	96.01	-0.1095676	96	-0.1972922	96	-0.2221273	96	-0.2114223	96	-0.211294	96	-0.2065344	96	-0.194097	96	-0.1756193	96	-0.1440796
96.21	-0.1763619	96.21	-0.1609742	96.21	-0.09172526	96.21	-0.06243512	96.21	-0.1157802	96.21	-0.1473118	96.21	-0.1308379	96.21	-0.1096555	96.19	-0.1970135	96.19	-0.2215616	96.19	-0.2095473	96.19	-0.2109298	96.19	-0.2061215	96.19	-0.1946811	96.19	-0.177289	96.19	-0.1427321
96.41	-0.1710819	96.41	-0.1668712	96.41	-0.09548214	96.41	-0.05899949	96.41	-0.1139404	96.41	-0.1389429	96.41	-0.130956	96.41	-0.1088489	96.4	-0.1928656	96.4	-0.2233648	96.4	-0.2091209	96.4	-0.2095257	96.4	-0.2026282	96.4	-0.1917959	96.4	-0.1763128	96.4	-0.1366597
96.61	-0.1722882	96.61	-0.1592338	96.61	-0.08909734	96.61	-0.05625296	96.61	-0.1066996	96.61	-0.1391	96.61	-0.1321104	96.61	-0.1076646	96.59	-0.1938389	96.59	-0.2226396	96.59	-0.2049744	96.59	-0.2066973	96.59	-0.204493	96.59	-0.1877668	96.59	-0.1771153	96.59	-0.1438859
96.81	-0.1757472	96.81	-0.1608647	96.81	-0.09564608	96.81	-0.05649046	96.81	-0.1100946	96.81	-0.1373512	96.81	-0.1263918	96.81	-0.1074876	96.8	-0.1860105	96.8	-0.2257104	96.8	-0.2091626	96.8	-0.205669	96.8	-0.2018604	96.8	-0.1915373	96.8	-0.1757266	96.8	-0.1365124
97.01	-0.1675036	97.01	-0.1585605	97.01	-0.0913574	97.01	-0.06010497	97.01	-0.1105062	97.01	-0.1381444	97.01	-0.1255343	97.01	-0.1074987	97	-0.1884771	97	-0.2195845	97	-0.2034952	97	-0.2034764	97	-0.203897	97	-0.190108	97	-0.1756259	97	-0.1400919
97.21	-0.1679104	97.21	-0.1572195	97.21	-0.09364603	97.21	-0.0596095	97.21	-0.1131783	97.21	-0.1377831	97.21	-0.12448	97.21	-0.1051743	97.2	-0.1894927	97.2	-0.2276845	97.2	-0.2036816	97.2	-0.2074044	97.2	-0.1989328	97.2	-0.1931735	97.2	-0.1737296	97.2	-0.1341379
97.41	-0.1672366	97.41	-0.1576817	97.41	-0.09092449	97.41	-0.05958255	97.41	-0.1063339	97.41	-0.1349787	97.41	-0.1246791	97.41	-0.1042644	97.4	-0.1892408	97.4	-0.2223754	97.4	-0.2048633	97.4	-0.2058616	97.4	-0.1965492	97.4	-0.1864246	97.4	-0.1708771	97.4	-0.1347466
97.61	-0.1721448	97.61	-0.1588984	97.61	-0.08948891	97.61	-0.05417952	97.61	-0.104647	97.61	-0.1327401	97.61	-0.1266325	97.61	-0.1007593	97.6	-0.1877128	97.6	-0.2204565	97.6	-0.20434	97.6	-0.2028176	97.6	-0.2028841	97.6	-0.1825286	97.6	-0.1689475	97.6	-0.1377881
97.81	-0.1669791	97.81	-0.1532548	97.81	-0.09111764	97.81	-0.05615575	97.81	-0.1001892	97.81	-0.1382454	97.81	-0.123679	97.81	-0.1038505	97.8	-0.1852991	97.8	-0.2190357	97.8	-0.2059059	97.8	-0.2039516	97.8	-0.1981583	97.8	-0.1907243	97.8	-0.1748759	97.8	-0.1361717
98.01	-0.1630593	98.01	-0.1515574	98.01	-0.08886741	98.01	-0.05406174	98.01	-0.1072415	98.01	-0.1331317	98.01	-0.1247821	98.01	-0.1005533	98	-0.1867743	98	-0.215248	98	-0.2044028	98	-0.2062291	98	-0.1995269	98	-0.1894928	98	-0.1693521	98	-0.1337896
98.21	-0.1670603	98.21	-0.1550229	98.21	-0.0849852	98.21	-0.05553157	98.21	-0.1026655	98.21	-0.1340767	98.21	-0.1164488	98.21	-0.1029596	98.19	-0.1854612	98.19	-0.2159029	98.19	-0.2029207	98.19	-0.2034916	98.19	-0.198813	98.19	-0.1855405	98.19	-0.1709953	98.19	-0.1390901
98.41	-0.1615563	98.41	-0.149318	98.41	-0.09020871	98.41	-0.04750226	98.41	-0.1005959	98.41	-0.1321254	98.41	-0.1245257	98.41	-0.1004644	98.39	-0.1833001	98.39	-0.215707	98.39	-0.2022974	98.39	-0.1998578	98.39	-0.1997835	98.39	-0.1813175	98.39	-0.1736424	98.39	-0.1375292
98.62	-0.1653296	98.62	-0.1504341	98.62	-0.08534858	98.62	-0.05065851	98.62	-0.1004615	98.62	-0.1318607	98.62	-0.1190767	98.62	-0.09791423	98.6	-0.1846295	98.6	-0.2157305	98.6	-0.200346	98.6	-0.1992963	98.6	-0.1989695	98.6	-0.1804084	98.6	-0.1695438	98.6	-0.1327909
98.81	-0.16334	98.81	-0.1518978	98.81	-0.08350871	98.81	-0.05300065	98.81	-0.09501022	98.81	-0.1296005	98.81	-0.1200743	98.81	-0.09796856	98.8	-0.1794855	98.8	-0.2180372	98.8	-0.2027038	98.8	-0.2001821	98.8	-0.1887911	98.8	-0.1836052	98.8	-0.1671765	98.8	-0.1333421
99.01	-0.1594037	99.01	-0.1467095	99.01	-0.08511142	99.01	-0.04410243	99.01	-0.09605806	99.01	-0.1289821	99.01	-0.1164274	99.01	-0.1026472	99	-0.1830516	99	-0.2176149	99	-0.197702	99	-0.2014604	99	-0.1923315	99	-0.1810564	99	-0.1681031	99	-0.1325096
99.21	-0.1603216	99.21	-0.1492182	99.21	-0.08371256	99.21	-0.0497985	99.21	-0.09692746	99.21	-0.1325056	99.21	-0.1167838	99.21	-0.09631442	99.2	-0.1836662	99.2	-0.2134123	99.2	-0.200556	99.2	-0.2005037	99.2	-0.191253	99.2	-0.1788098	99.2	-0.1661495	99.2	-0.1347395
99.43	-0.1584275	99.43	-0.1506456	99.43	-0.08279049	99.43	-0.0442355	99.43	-0.09746528	99.43	-0.130901	99.43	-0.1221227	99.43	-0.09682916	99.4	-0.1803435	99.4	-0.214001	99.4	-0.2011397	99.4	-0.1985122	99.4	-0.193919	99.4	-0.1770388	99.4	-0.1623137	99.4	-0.1275415
99.61	-0.1606445	99.61	-0.1407087	99.61	-0.08194251	99.61	-0.04632766	99.61	-0.09667359	99.61	-0.1255512	99.61	-0.1131012	99.61	-0.09695842	99.59	-0.1794676	99.59	-0.2156418	99.59	-0.2002359	99.59	-0.2003611	99.59	-0.1964199	99.59	-0.1813576	99.59	-0.1667816	99.59	-0.1286404
99.81	-0.1599674	99.81	-0.1415241	99.81	-0.08044444	99.81	-0.0447074	99.81	-0.09575402	99.81	-0.1297875	99.81	-0.1124074	99.81	-0.09237005	99.8	-0.1801986	99.8	-0.2094217	99.8	-0.2011168	99.8	-0.1971102	99.8	-0.1897484	99.8	-0.1853954	99.8	-0.1660087	99.8	-0.1312442
100.01	-0.1577788	100.01	-0.1435206	100.01	-0.07859097	100.01	-0.0468947	100.01	-0.09404816	100.01	-0.1253285	100.01	-0.1147093	100.01	-0.09080802	100	-0.1778944	100	-0.2104198	100	-0.1951048	100	-0.2042075	100	-0.188851	100	-0.1804485	100	-0.1688343	100	-0.1268201
100.21	-0.1557889	100.21	-0.1458545	100.21	-0.0822297	100.21	-0.04376826	100.21	-0.08861223	100.21	-0.1271082	100.21	-0.1114028	100.21	-0.09423229	100.2	-0.1788237	100.2	-0.2152366	100.2	-0.1947231	100.2	-0.1982167	100.2	-0.1896003	100.2	-0.1767996	100.2	-0.1634764	100.2	-0.129637
100.41	-0.1580238	100.41	-0.1454783	100.41	-0.07517137	100.41	-0.04221818	100.41	-0.09023459	100.41	-0.1253529	100.41	-0.1120958	100.41	-0.08903895	100.4	-0.1789055	100.4	-0.2127617	100.4	-0.1970198	100.4	-0.1954937	100.4	-0.1905252	100.4	-0.1774241	100.4	-0.169399	100.4	-0.128535
100.61	-0.1565437	100.61	-0.1445757	100.61	-0.07821889	100.61	-0.04620479	100.61	-0.0888027	100.61	-0.1216179	100.61	-0.1089879	100.61	-0.08985426	100.6	-0.1806266	100.6	-0.2120396	100.6	-0.1920031	100.6	-0.1931461	100.6	-0.1843789	100.6	-0.1841137	100.6	-0.1663074	100.6	-0.1261698
100.81	-0.1563261	100.81	-0.137379	100.81	-0.07546076	100.81	-0.04647472	100.81	-0.09023917	100.81	-0.1209498	100.81	-0.1102978	100.81	-0.08624481	100.8	-0.1781918	100.8	-0.2090369	100.8	-0.192563	100.8	-0.1969377	100.8	-0.1862415	100.8	-0.1805056	100.8	-0.1625457	100.8	-0.1277031
101.01	-0.1562491	101.01	-0.1383059	101.01	-0.07668156	101.01	-0.04189164	101.01	-0.09301937	101.01	-0.1258216	101.01	-0.1116857	101.01	-0.08785673	101	-0.1781594	101	-0.2085299	101	-0.195048	101	-0.1940873	101	-0.1874554	101	-0.1748797	101	-0.1662982	101	-0.1251516
101.21	-0.1504753	101.21	-0.1388554	101.21	-0.07243035	101.21	-0.04389751	101.21	-0.09200991	101.21	-0.1195081	101.21	-0.1113997	101.21	-0.08842625	101.2	-0.1741489	101.2	-0.2119302	101.2	-0.1928272	101.2	-0.1948777	101.2	-0.1826792	101.2	-0.1730609	101.2	-0.1623226	101.2	-0.1258246
101.41	-0.1473496	101.41	-0.1393903	101.41	-0.07686466	101.41	-0.0383748	101.41	-0.08810648	101.41	-0.1207413	101.41	-0.1106738	101.41	-0.08465847	101.4	-0.1764722	101.4	-0.2133946	101.4	-0.1922444	101.4	-0.1950961	101.4	-0.1879237	101.4	-0.1733977	101.4	-0.1684766	101.4	-0.1295391
101.61	-0.1536273	101.61	-0.135543	101.61	-0.07326167	101.61	-0.03825714	101.61	-0.08678315	101.61	-0.1202703	101.61	-0.1078944	101.61	-0.08766922	101.6	-0.1760015	101.6	-0.2098734	101.6	-0.1898436	101.6	-0.1915199	101.6	-0.1874281	101.6	-0.1742239	101.6	-0.1627808	101.6	-0.1339865
101.81	-0.1470011	101.81	-0.1401197	101.81	-0.07378321	101.81	-0.04102898	101.81	-0.08729941	101.81	-0.1220434	101.81	-0.1093198	101.81	-0.08635852	101.8	-0.1737213	101.8	-0.2066008	101.8	-0.1882845	101.8	-0.1954931	101.8	-0.1839129	101.8	-0.1748067	101.8	-0.1628469	101.8	-0.1242255
102.01	-0.1479165	102.01	-0.1349567	102.01	-0.07438177	102.01	-0.03876629	102.01	-0.08630454	102.01	-0.1195129	102.01	-0.1084913	102.01	-0.08572489	102	-0.1748866	102	-0.2086316	102	-0.1887456	102	-0.1963736	102	-0.1885368	102	-0.1738451	102	-0.1612039	102	-0.1295565
102.21	-0.1516979	102.21	-0.13803	102.21	-0.06873327	102.21	-0.0390185	102.21	-0.08113228	102.21	-0.1188008	102.21	-0.1059583	102.21	-0.0834517	102.2	-0.1734946	102.2	-0.211209	102.2	-0.1927594	102.2	-0.1924759	102.2	-0.1814044	102.2	-0.1737333	102.2	-0.1608201	102.2	-0.1214418
102.41	-0.1491344	102.41	-0.1388568	102.41	-0.07076541	102.41	-0.03554798	102.41	-0.08426243	102.41	-0.1158456	102.41	-0.1051382	102.41	-0.08354351	102.4	-0.1746007	102.4	-0.2036738	102.4	-0.1886977	102.4	-0.1912438	102.4	-0.1850701	102.4	-0.1702868	102.4	-0.161421	102.4	-0.1245877
102.61	-0.1464461	102.61	-0.1322807	102.61	-0.06826965	102.61	-0.03278448	102.61	-0.08824579	102.61	-0.116686	102.61	-0.102298	102.61	-0.08212876	102.6	-0.1734581	102.6	-0.2060001	102.6	-0.1879783	102.6	-0.1902155	102.6	-0.1796465	102.6	-0.1763755	102.6	-0.1574857	102.6	-0.1272218
102.81	-0.1479914	102.81	-0.1343344	102.81	-0.06787477	102.81	-0.03659783	102.81	-0.0853806	102.81	-0.1155014	102.81	-0.1046342	102.81	-0.08219366	102.8	-0.1758962	102.8	-0.2124667	102.8	-0.1934007	102.8	-0.1921314	102.8	-0.1824899	102.8	-0.175392	102.8	-0.1567775	102.8	-0.1260716
103.01	-0.1468803	103.01	-0.1318082	103.01	-0.06994403	103.01	-0.03609281	103.01	-0.08579031	103.01	-0.1160518	103.01	-0.1057547	103.01	-0.07883278	103	-0.1691357	103	-0.2047553	103	-0.1911718	103	-0.1887367	103	-0.1822043	103	-0.1702987	103	-0.1619364	103	-0.1221099
103.21	-0.1459508	103.21	-0.1347324	103.21	-0.06656777	103.21	-0.03427175	103.21	-0.08642904	103.21	-0.1203729	103.21	-0.09715334	103.21	-0.08037008	103.2	-0.170008	103.2	-0.2105055	103.2	-0.1908315	103.2	-0.187472	103.2	-0.178653	103.2	-0.1713343	103.2	-0.1526449	103.2	-0.1263615
103.41	-0.1447142	103.41	-0.1349671	103.41	-0.06945953	103.41	-0.0365817	103.41	-0.08660146	103.41	-0.1161944	103.41	-0.1025666	103.41	-0.0822504	103.4	-0.1712295	103.4	-0.205624	103.4	-0.1896317	103.4	-0.190502	103.4	-0.1788471	103.4	-0.1707607	103.4	-0.1582449	103.4	-0.1204148
103.61	-0.1410863	103.61	-0.1322646	103.61	-0.06721281	103.61	-0.0346056	103.61	-0.081264	103.61	-0.1110716	103.61	-0.0966891	103.61	-0.07980126	103.6	-0.1739298	103.6	-0.2046362	103.6	-0.1848999	103.6	-0.1866404	103.6	-0.1771702	103.6	-0.1731561	103.6	-0.15837	103.6	-0.1214298
103.81	-0.1418552	103.81	-0.1291603	103.81	-0.06578114	103.81	-0.03277325	103.81	-0.07913227	103.81	-0.1125933	103.81	-0.1000669	103.81	-0.0734224	103.8	-0.1685274	103.8	-0.199843	103.8	-0.1875214	103.8	-0.1911324	103.8	-0.1804925	103.8	-0.1725208	103.8	-0.1575911	103.8	-0.122628
104.01	-0.1405473	104.01	-0.1299483	104.01	-0.065762	104.01	-0.03622389	104.01	-0.07651015	104.01	-0.1123946	104.01	-0.1040086	104.01	-0.07924327	104	-0.1670141	104	-0.2002711	104	-0.1837389	104	-0.1895011	104	-0.1780707	104	-0.1701808	104	-0.155187	104	-0.1216
104.21	-0.138853	104.21	-0.1286756	104.21	-0.06220011	104.21	-0.02731448	104.21	-0.07829928	104.21	-0.1092505	104.21	-0.09988345	104.21	-0.07746433	104.2	-0.1737213	104.2	-0.2037567	104.2	-0.1891986	104.2	-0.1911062	104.2	-0.1763379	104.2	-0.1755464	104.2	-0.156235	104.2	-0.1231498
104.41	-0.1434433	104.41	-0.1320536	104.41	-0.06509996	104.41	-0.03370238	104.41	-0.07573741	104.41	-0.1105675	104.41	-0.09900602	104.41	-0.07698728	104.4	-0.1712858	104.4	-0.2025933	104.4	-0.1865425	104.4	-0.1877332	104.4	-0.1803013	104.4	-0.1650154	104.4	-0.1628888	104.4	-0.1195147
104.61	-0.1456709	104.61	-0.1255824	104.61	-0.0661664	104.61	-0.03101317	104.61	-0.0734406	104.61	-0.1103277	104.61	-0.09487206	104.61	-0.07898685	104.6	-0.1663505	104.6	-0.2010218	104.6	-0.1866603	104.6	-0.1890741	104.6	-0.1801415	104.6	-0.1672085	104.6	-0.1545441	104.6	-0.1217391
104.81	-0.1384153	104.81	-0.1288561	104.81	-0.06358492	104.81	-0.0262337	104.81	-0.07422738	104.81	-0.1026906	104.81	-0.09428478	104.81	-0.07985936	104.8	-0.1718902	104.8	-0.2028457	104.8	-0.1873833	104.8	-0.1872944	104.8	-0.1766722	104.8	-0.1686255	104.8	-0.1557226	104.8	-0.1196221
105.01	-0.1403604	105.01	-0.1259104	105.01	-0.06333659	105.01	-0.0286385	105.01	-0.07647675	105.01	-0.108168	105.01	-0.09639338	105.01	-0.07046462	105	-0.16541	105	-0.2008812	105	-0.1836963	105	-0.186678	105	-0.1739714	105	-0.1666607	105	-0.1547396	105	-0.1242109
105.21	-0.1372643	105.21	-0.1274679	105.21	-0.06114678	105.21	-0.02602683	105.21	-0.07705744	105.21	-0.1113197	105.21	-0.0963283	105.21	-0.07674365	105.2	-0.1695867	105.2	-0.2019903	105.2	-0.1816299	105.2	-0.1861909	105.2	-0.177649	105.2	-0.1667827	105.2	-0.1514135	105.2	-0.1217242
105.41	-0.1372882	105.41	-0.1232245	105.41	-0.05899061	105.41	-0.02413049	105.41	-0.07630814	105.41	-0.1053856	105.41	-0.09483457	105.41	-0.07309045	105.4	-0.1682777	105.4	-0.2015473	105.4	-0.1835429	105.4	-0.1874059	105.4	-0.1779415	105.4	-0.1699394	105.4	-0.1500516	105.4	-0.119967
105.61	-0.1375583	105.61	-0.1241812	105.61	-0.0583024	105.61	-0.02520782	105.61	-0.07569825	105.61	-0.1058416	105.61	-0.09468005	105.61	-0.0720254	105.6	-0.1668134	105.6	-0.20001	105.6	-0.1810668	105.6	-0.1873502	105.6	-0.1765719	105.6	-0.1670859	105.6	-0.1502007	105.6	-0.1193477
105.81	-0.1395742	105.81	-0.1236488	105.81	-0.05780385	105.81	-0.02012994	105.81	-0.07281205	105.81	-0.1005159	105.81	-0.09003628	105.81	-0.06796293	105.8	-0.1652311	105.8	-0.194643	105.8	-0.18507	105.8	-0.1839075	105.8	-0.1749806	105.8	-0.1670123	105.8	-0.1521283	105.8	-0.117697
106.01	-0.1324328	106.01	-0.1221472	106.01	-0.05752325	106.01	-0.02410831	106.01	-0.07585169	106.01	-0.1004804	106.01	-0.09505925	106.01	-0.06998706	106	-0.1675422	106	-0.1975214	106	-0.1825372	106	-0.1851678	106	-0.1720938	106	-0.1657884	106	-0.1540656	106	-0.1159289
106.21	-0.132831	106.21	-0.1245655	106.21	-0.05516536	106.21	-0.02233986	106.21	-0.07018081	106.21	-0.1055081	106.21	-0.09491529	106.21	-0.07240575	106.2	-0.1655416	106.2	-0.1972167	106.2	-0.1799556	106.2	-0.1799901	106.2	-0.1718803	106.2	-0.1619367	106.2	-0.1518018	106.2	-0.1157436
106.41	-0.1387313	106.41	-0.1226475	106.41	-0.05708095	106.41	-0.02468909	106.41	-0.07286277	106.41	-0.1010018	106.41	-0.0946938	106.41	-0.07045574	106.4	-0.1683932	106.4	-0.1954984	106.4	-0.1783913	106.4	-0.1811721	106.4	-0.1747337	106.4	-0.1681106	106.4	-0.1517384	106.4	-0.1189938
106.61	-0.1287452	106.61	-0.1230673	106.61	-0.05510537	106.61	-0.01952091	106.61	-0.06628703	106.61	-0.101513	106.61	-0.09550626	106.61	-0.06575142	106.6	-0.1632081	106.6	-0.1968495	106.6	-0.1828522	106.6	-0.1850891	106.6	-0.1742678	106.6	-0.1618329	106.6	-0.1530944	106.6	-0.1192719
106.81	-0.1354998	106.81	-0.1212444	106.81	-0.0550275	106.81	-0.01686816	106.81	-0.06848998	106.81	-0.1006636	106.81	-0.08738925	106.81	-0.06747418	106.8	-0.1662551	106.8	-0.1919962	106.8	-0.1790421	106.8	-0.1789129	106.8	-0.1739005	106.8	-0.1622312	106.8	-0.1526688	106.8	-0.1128158
107.01	-0.1300512	107.01	-0.1192108	107.01	-0.05582412	107.01	-0.02171187	107.01	-0.06894822	107.01	-0.1019209	107.01	-0.09252328	107.01	-0.07231164	107	-0.1595874	107	-0.1984867	107	-0.1805836	107	-0.1771823	107	-0.1722003	107	-0.1672999	107	-0.1500108	107	-0.1084593
107.21	-0.1321759	107.21	-0.1217823	107.21	-0.05264431	107.21	-0.02058632	107.21	-0.06846386	107.21	-0.1001801	107.21	-0.09325935	107.21	-0.0693664	107.2	-0.16047	107.2	-0.1992847	107.2	-0.1825313	107.2	-0.1810803	107.2	-0.1733212	107.2	-0.1673104	107.2	-0.1513199	107.2	-0.1151228
107.41	-0.1307907	107.41	-0.1199725	107.41	-0.06118771	107.41	-0.02502982	107.41	-0.0677873	107.41	-0.1045606	107.41	-0.08453257	107.41	-0.06792013	107.4	-0.1606494	107.4	-0.1966192	107.4	-0.1746904	107.4	-0.1817077	107.4	-0.1688357	107.4	-0.1612466	107.4	-0.1511182	107.4	-0.1157814
107.61	-0.1308651	107.61	-0.1221057	107.61	-0.05264919	107.61	-0.02333098	107.61	-0.06601083	107.61	-0.09950785	107.61	-0.09775507	107.61	-0.06337898	107.6	-0.1609241	107.6	-0.1913497	107.6	-0.1757266	107.6	-0.1818634	107.6	-0.1715299	107.6	-0.1618025	107.6	-0.1472551	107.6	-0.1071956
107.81	-0.1295574	107.81	-0.1199914	107.81	-0.05423121	107.81	-0.02100167	107.81	-0.06831191	107.81	-0.09776156	107.81	-0.09046343	107.81	-0.06731444	107.8	-0.1614895	107.8	-0.1901745	107.8	-0.1800954	107.8	-0.183135	107.8	-0.1714404	107.8	-0.1604021	107.8	-0.148778	107.8	-0.1185456
108.01	-0.130686	108.01	-0.1159021	108.01	-0.05123829	108.01	-0.01512221	108.01	-0.0666969	108.01	-0.09538962	108.01	-0.08823842	108.01	-0.06076252	108	-0.1589406	108	-0.1941741	108	-0.1771263	108	-0.1799528	108	-0.1685223	108	-0.161502	108	-0.1481266	108	-0.1134312
108.21	-0.1247911	108.21	-0.1134297	108.21	-0.05295734	108.21	-0.02278506	108.21	-0.06610515	108.21	-0.1014958	108.21	-0.0842782	108.21	-0.06381213	108.2	-0.1572559	108.2	-0.195748	108.2	-0.178778	108.2	-0.1805278	108.2	-0.1709008	108.2	-0.1620797	108.2	-0.1417241	108.2	-0.1118145
108.41	-0.1282329	108.41	-0.119202	108.41	-0.05165337	108.41	-0.0158758	108.41	-0.06237428	108.41	-0.09965312	108.41	-0.0871084	108.41	-0.06838698	108.4	-0.160343	108.4	-0.1925294	108.4	-0.1770116	108.4	-0.1823114	108.4	-0.1727798	108.4	-0.1609108	108.4	-0.1457557	108.4	-0.1150894
108.61	-0.127359	108.61	-0.1119386	108.61	-0.04989293	108.61	-0.02029424	108.61	-0.06388006	108.61	-0.101008	108.61	-0.08554982	108.61	-0.06462115	108.6	-0.1580628	108.6	-0.1918089	108.6	-0.1774678	108.6	-0.1792207	108.6	-0.1706402	108.6	-0.1563772	108.6	-0.1478727	108.6	-0.1137439
108.81	-0.129048	108.81	-0.1165133	108.81	-0.05055668	108.81	-0.01556108	108.81	-0.06792544	108.81	-0.09789178	108.81	-0.08390497	108.81	-0.06316536	108.8	-0.1588178	108.8	-0.1898339	108.8	-0.1741324	108.8	-0.1808127	108.8	-0.1657109	108.8	-0.1585483	108.8	-0.1462425	108.8	-0.1145674
109.01	-0.1275118	109.01	-0.1132998	109.01	-0.04705115	109.01	-0.0164956	109.01	-0.06386789	109.01	-0.09732255	109.01	-0.08522299	109.01	-0.06332704	109	-0.1571217	109	-0.1937722	109	-0.1743805	109	-0.1790991	109	-0.168385	109	-0.1605775	109	-0.1472413	109	-0.1115058
109.21	-0.1250589	109.21	-0.1131732	109.21	-0.04942258	109.21	-0.01067613	109.21	-0.06197394	109.21	-0.09832132	109.21	-0.0857274	109.21	-0.06533867	109.2	-0.1606659	109.2	-0.1914513	109.2	-0.1734432	109.2	-0.179707	109.2	-0.1640538	109.2	-0.157224	109.2	-0.1471231	109.2	-0.114125
109.41	-0.1235632	109.41	-0.1112604	109.41	-0.04588727	109.41	-0.01272823	109.41	-0.06131167	109.41	-0.09256271	109.41	-0.08204447	109.41	-0.06435996	109.4	-0.1607411	109.4	-0.1890719	109.4	-0.1736465	109.4	-0.1757396	109.4	-0.1635368	109.4	-0.1589205	109.4	-0.141974	109.4	-0.1087769
109.61	-0.12436	109.61	-0.1141205	109.61	-0.04323852	109.61	-0.01527899	109.61	-0.06165212	109.61	-0.09663546	109.61	-0.08065756	109.61	-0.06454138	109.6	-0.1570339	109.6	-0.1873133	109.6	-0.177459	109.6	-0.1807829	109.6	-0.1662935	109.6	-0.1570864	109.6	-0.1442051	109.6	-0.1086252
109.81	-0.1253695	109.81	-0.1115437	109.81	-0.04616551	109.81	-0.01146981	109.81	-0.06364196	109.81	-0.09685456	109.81	-0.08277351	109.81	-0.05736474	109.8	-0.1614004	109.8	-0.1925039	109.8	-0.1760527	109.8	-0.1763099	109.8	-0.1676689	109.8	-0.1532597	109.8	-0.1411404	109.8	-0.1089446
110.01	-0.1222933	110.01	-0.112613	110.01	-0.04948133	110.01	-0.01280459	110.01	-0.05826752	110.01	-0.09141044	110.01	-0.08016853	110.01	-0.0563704	110	-0.1585711	110	-0.1913524	110	-0.1768248	110	-0.1743905	110	-0.1649378	110	-0.1584632	110	-0.1445583	110	-0.1091732
110.21	-0.1233262	110.21	-0.1102399	110.21	-0.04384259	110.21	-0.01094922	110.21	-0.05956529	110.21	-0.08752906	110.21	-0.08012021	110.21	-0.06137955	110.2	-0.1564761	110.2	-0.1916207	110.2	-0.1740945	110.2	-0.1737048	110.2	-0.1653316	110.2	-0.1538925	110.2	-0.141822	110.2	-0.1131654
110.41	-0.1232656	110.41	-0.1129576	110.41	-0.04715723	110.41	-0.01111165	110.41	-0.05919142	110.41	-0.09141508	110.41	-0.08268221	110.41	-0.06283969	110.4	-0.1577618	110.4	-0.1894006	110.4	-0.1745363	110.4	-0.1741418	110.4	-0.1658099	110.4	-0.1572546	110.4	-0.1423332	110.4	-0.1078497
110.61	-0.1240361	110.61	-0.1128601	110.61	-0.04934049	110.61	-0.00404241	110.61	-0.05715743	110.61	-0.09303657	110.61	-0.08062451	110.61	-0.05676426	110.6	-0.1553847	110.6	-0.1889938	110.6	-0.168164	110.6	-0.1724761	110.6	-0.1644119	110.6	-0.1555914	110.6	-0.1416009	110.6	-0.1116452
110.81	-0.1197041	110.81	-0.1093	110.81	-0.04183358	110.81	-0.01099604	110.81	-0.05771083	110.81	-0.0890275	110.81	-0.07856881	110.81	-0.06006287	110.8	-0.1613551	110.8	-0.1849935	110.8	-0.1760883	110.8	-0.1761254	110.8	-0.1623547	110.8	-0.1551363	110.8	-0.1431533	110.8	-0.1071941
111.01	-0.1232054	111.01	-0.1079789	111.01	-0.04718188	111.01	-0.01085576	111.01	-0.05721018	111.01	-0.08686106	111.01	-0.08012954	111.01	-0.05976205	111	-0.1578057	111	-0.1873955	111	-0.1725241	111	-0.1715011	111	-0.1612536	111	-0.1523324	111	-0.1474885	111	-0.1087033
111.21	-0.1195385	111.21	-0.1063993	111.21	-0.04208691	111.21	-0.00999781	111.21	-0.05667146	111.21	-0.08831086	111.21	-0.0816455	111.21	-0.05651861	111.2	-0.1543244	111.2	-0.1871264	111.2	-0.1674379	111.2	-0.1753711	111.2	-0.1596674	111.2	-0.1538264	111.2	-0.1409333	111.2	-0.1102973
111.41	-0.1205833	111.41	-0.1020485	111.41	-0.0384862	111.41	-0.01416106	111.41	-0.05858657	111.41	-0.09024343	111.41	-0.07799084	111.41	-0.05684704	111.4	-0.1562452	111.4	-0.1866596	111.4	-0.1753484	111.4	-0.1743936	111.4	-0.1600868	111.4	-0.1534997	111.4	-0.1404116	111.4	-0.1098945
111.61	-0.1158272	111.61	-0.1057129	111.61	-0.0433369	111.61	-0.00962737	111.61	-0.05388216	111.61	-0.09025842	111.61	-0.07572871	111.61	-0.05627559	111.6	-0.1549958	111.6	-0.188531	111.6	-0.1683139	111.6	-0.1697871	111.6	-0.1578756	111.6	-0.1557723	111.6	-0.1445571	111.6	-0.1083008
111.81	-0.1185312	111.81	-0.1027057	111.81	-0.04014613	111.81	-0.00939147	111.81	-0.05184729	111.81	-0.09045538	111.81	-0.07414215	111.81	-0.05663832	111.8	-0.1574187	111.8	-0.1869624	111.8	-0.1718801	111.8	-0.171733	111.8	-0.1559664	111.8	-0.1509369	111.8	-0.141082	111.8	-0.1055571
112.01	-0.115718	112.01	-0.1095108	112.01	-0.04429114	112.01	-0.01056102	112.01	-0.05550279	112.01	-0.08984012	112.01	-0.07595356	112.01	-0.06112812	112	-0.1577289	112	-0.183319	112	-0.1684626	112	-0.1752742	112	-0.160023	112	-0.1512065	112	-0.1438226	112	-0.1086198
112.21	-0.1134975	112.21	-0.1017388	112.21	-0.03911088	112.21	-0.0079403	112.21	-0.05593757	112.21	-0.08831779	112.21	-0.0782445	112.21	-0.05437155	112.2	-0.1536037	112.2	-0.1859538	112.2	-0.1664461	112.2	-0.1716458	112.2	-0.1607924	112.2	-0.1523506	112.2	-0.1457452	112.2	-0.104943
112.41	-0.1175263	112.41	-0.1036343	112.41	-0.03882708	112.41	-0.00802972	112.41	-0.04984498	112.41	-0.08617143	112.41	-0.07691667	112.41	-0.05525106	112.4	-0.1557955	112.4	-0.1839503	112.4	-0.1681745	112.4	-0.1641439	112.4	-0.1595059	112.4	-0.1494611	112.4	-0.1428688	112.4	-0.1063243
112.61	-0.1171695	112.61	-0.1028715	112.61	-0.04527157	112.61	-0.00841333	112.61	-0.05478515	112.61	-0.0843656	112.61	-0.07279918	112.61	-0.05450744	112.6	-0.154316	112.6	-0.1866802	112.6	-0.1694165	112.6	-0.1710611	112.6	-0.1609655	112.6	-0.1503517	112.6	-0.1378832	112.6	-0.1061735
112.81	-0.1168509	112.81	-0.1034466	112.81	-0.04176424	112.81	-0.00908603	112.81	-0.05378748	112.81	-0.08798926	112.81	-0.07366741	112.81	-0.05330932	112.8	-0.1514832	112.8	-0.1815177	112.8	-0.1650857	112.8	-0.1716345	112.8	-0.1630991	112.8	-0.1551411	112.8	-0.1365975	112.8	-0.1066303
113.01	-0.1123891	113.01	-0.1034241	113.01	-0.04292662	113.01	-0.00249473	113.01	-0.05479925	113.01	-0.08497076	113.01	-0.07343137	113.01	-0.05586927	113	-0.1581714	113	-0.180132	113	-0.168032	113	-0.1679981	113	-0.1606437	113	-0.1543453	113	-0.1400576	113	-0.1067085
113.21	-0.1196856	113.21	-0.1033049	113.21	-0.04068076	113.21	-0.00910258	113.21	-0.05488598	113.21	-0.08634578	113.21	-0.07191564	113.21	-0.05610102	113.2	-0.148453	113.2	-0.1846378	113.2	-0.168656	113.2	-0.1698554	113.2	-0.1591534	113.2	-0.1511779	113.2	-0.1398728	113.2	-0.1063926
113.41	-0.1166828	113.41	-0.1027144	113.41	-0.04084719	113.41	-0.0060149	113.41	-0.05256689	113.41	-0.08439294	113.41	-0.07557653	113.41	-0.05159824	113.4	-0.1492081	113.4	-0.182678	113.4	-0.1639412	113.4	-0.1695503	113.4	-0.1581174	113.4	-0.1524357	113.4	-0.1421964	113.4	-0.1057177
113.61	-0.1146944	113.61	-0.1018016	113.61	-0.03699459	113.61	-0.00634901	113.61	-0.04736823	113.61	-0.08783709	113.61	-0.07231119	113.61	-0.04871117	113.6	-0.1542879	113.6	-0.1779746	113.6	-0.1701002	113.6	-0.1713711	113.6	-0.1596466	113.6	-0.1531534	113.6	-0.1374392	113.6	-0.1066255
113.81	-0.1138816	113.81	-0.09908673	113.81	-0.03910647	113.81	-0.00336194	113.81	-0.05138024	113.81	-0.08393797	113.81	-0.06838055	113.81	-0.05052275	113.8	-0.1481073	113.8	-0.1851496	113.8	-0.1709135	113.8	-0.1663431	113.8	-0.1546526	113.8	-0.1540399	113.8	-0.1388838	113.8	-0.1034214
114.01	-0.112653	114.01	-0.0968329	114.01	-0.03499436	114.01	-0.00562396	114.01	-0.04868044	114.01	-0.08154944	114.01	-0.06991885	114.01	-0.0475419	114	-0.1508161	114	-0.1836165	114	-0.1690594	114	-0.1698709	114	-0.1565265	114	-0.1493993	114	-0.1416772	114	-0.1045616
114.21	-0.1145315	114.21	-0.1000944	114.21	-0.03826185	114.21	-0.00373252	114.21	-0.04913984	114.21	-0.0820906	114.21	-0.06885777	114.21	-0.04627755	114.2	-0.1500601	114.2	-0.1856567	114.2	-0.1628503	114.2	-0.1648231	114.2	-0.1553481	114.2	-0.1514734	114.2	-0.1362082	114.2	-0.1097925
114.41	-0.1121677	114.41	-0.09768759	114.41	-0.03667743	114.41	-0.00135429	114.41	-0.0466184	114.41	-0.08374514	114.41	-0.07062876	114.41	-0.0445178	114.4	-0.1489439	114.4	-0.1821853	114.4	-0.1689008	114.4	-0.1694915	114.4	-0.1587713	114.4	-0.149913	114.4	-0.1307655	114.4	-0.1016207
114.61	-0.1103842	114.61	-0.09682288	114.61	-0.04228899	114.61	-0.00330314	114.61	-0.04506147	114.61	-0.08039191	114.61	-0.07172184	114.61	-0.04774779	114.6	-0.1562667	114.6	-0.1826864	114.6	-0.1669238	114.6	-0.1687985	114.6	-0.1534176	114.6	-0.150077	114.6	-0.1356122	114.6	-0.1027458
114.81	-0.1101421	114.81	-0.09682942	114.81	-0.03428862	114.81	-0.00465062	114.81	-0.04348851	114.81	-0.08339175	114.81	-0.0713523	114.81	-0.0475365	114.8	-0.1506758	114.8	-0.1805864	114.8	-0.165107	114.8	-0.1666419	114.8	-0.1609035	114.8	-0.1531098	114.8	-0.1406893	114.8	-0.1029422
115.01	-0.1092674	115.01	-0.09743281	115.01	-0.03847592	115.01	-0.00091547	115.01	-0.0470598	115.01	-0.07930434	115.01	-0.06570908	115.01	-0.04727696	115	-0.1468728	115	-0.1814628	115	-0.1645354	115	-0.1699242	115	-0.1560453	115	-0.1502262	115	-0.1389801	115	-0.1002438
115.21	-0.1114168	115.21	-0.1012866	115.21	-0.03483526	115.21	-0.00169292	115.21	-0.04731337	115.21	-0.07856324	115.21	-0.06873339	115.21	-0.04624152	115.2	-0.150157	115.2	-0.1771518	115.2	-0.164069	115.2	-0.1619644	115.2	-0.1546249	115.2	-0.1466271	115.2	-0.1345804	115.2	-0.09992696
115.41	-0.1109155	115.41	-0.09859055	115.41	-0.0339272	115.41	-0.00127179	115.41	-0.04401029	115.41	-0.07954504	115.41	-0.07181928	115.41	-0.05050742	115.4	-0.1479287	115.4	-0.1800826	115.4	-0.1660644	115.4	-0.1701078	115.4	-0.1531643	115.4	-0.1473201	115.4	-0.1377389	115.4	-0.1036288
115.61	-0.1107999	115.61	-0.09687907	115.61	-0.0378492	115.61	-0.00136322	115.61	-0.0421325	115.61	-0.07989146	115.61	-0.07200675	115.61	-0.04469312	115.6	-0.1499828	115.6	-0.1800552	115.6	-0.1643124	115.6	-0.1666126	115.6	-0.1553833	115.6	-0.143698	115.6	-0.133914	115.6	-0.0970977
115.81	-0.108498	115.81	-0.0983085	115.81	-0.03219919	115.81	-0.00306155	115.81	-0.04467164	115.81	-0.07647671	115.81	-0.06580315	115.81	-0.04291479	115.8	-0.1527023	115.8	-0.1777437	115.8	-0.1657383	115.8	-0.1691367	115.8	-0.1514465	115.8	-0.148842	115.8	-0.1356144	115.8	-0.1032251
116.01	-0.1078557	116.01	-0.09529117	116.01	-0.03442499	116.01	0.00111254	116.01	-0.04535028	116.01	-0.08093232	116.01	-0.06607984	116.01	-0.04419458	116	-0.1449017	116	-0.180948	116	-0.1630498	116	-0.1673929	116	-0.1582708	116	-0.1464422	116	-0.1361254	116	-0.09634001
116.21	-0.1095947	116.21	-0.09570882	116.21	-0.02965567	116.21	-0.00177176	116.21	-0.04505824	116.21	-0.07806332	116.21	-0.06644102	116.21	-0.04188414	116.2	-0.1450685	116.2	-0.1780447	116.2	-0.1589945	116.2	-0.1608179	116.2	-0.1559204	116.2	-0.1445841	116.2	-0.1376822	116.2	-0.1004766
116.41	-0.1112446	116.41	-0.09729854	116.41	-0.02973565	116.41	0.00109184	116.41	-0.04372068	116.41	-0.08522669	116.41	-0.06403472	116.41	-0.04150764	116.4	-0.1446153	116.4	-0.1767578	116.4	-0.1645856	116.4	-0.1652492	116.4	-0.1512675	116.4	-0.149305	116.4	-0.1362751	116.4	-0.1028891
116.61	-0.104799	116.61	-0.09418064	116.61	-0.03277622	116.61	0.00225252	116.61	-0.04285969	116.61	-0.07845052	116.61	-0.06865525	116.61	-0.04546952	116.6	-0.1446612	116.6	-0.1812062	116.6	-0.1607537	116.6	-0.1671538	116.6	-0.1542824	116.6	-0.1500324	116.6	-0.1313113	116.6	-0.09936618
116.81	-0.1028864	116.81	-0.09496231	116.81	-0.02932388	116.81	0.00170351	116.81	-0.04302612	116.81	-0.080219	116.81	-0.06588726	116.81	-0.04373398	116.8	-0.1499456	116.8	-0.1770551	116.8	-0.1660578	116.8	-0.1639211	116.8	-0.1485151	116.8	-0.1434918	116.8	-0.1343773	116.8	-0.09980635
117.01	-0.1045434	117.01	-0.09703446	117.01	-0.03130405	117.01	0.00273252	117.01	-0.04185912	117.01	-0.07527243	117.01	-0.06212501	117.01	-0.0484801	117	-0.1483595	117	-0.178909	117	-0.160964	117	-0.1653541	117	-0.1500342	117	-0.1431619	117	-0.1344535	117	-0.100735
117.21	-0.106659	117.21	-0.09735691	117.21	-0.02981829	117.21	0.00311502	117.21	-0.04029978	117.21	-0.07352256	117.21	-0.06792201	117.21	-0.0401963	117.2	-0.1449027	117.2	-0.1762652	117.2	-0.1614413	117.2	-0.1611288	117.2	-0.1527459	117.2	-0.1474199	117.2	-0.1349344	117.2	-0.09971352
117.41	-0.1093619	117.41	-0.09426024	117.41	-0.02905032	117.41	0.00243166	117.41	-0.04215895	117.41	-0.07425287	117.41	-0.06769924	117.41	-0.04363012	117.4	-0.1435057	117.4	-0.1739622	117.4	-0.1640249	117.4	-0.1671949	117.4	-0.1513426	117.4	-0.1455158	117.4	-0.1325764	117.4	-0.09894542
117.61	-0.105857	117.61	-0.09228216	117.61	-0.02781186	117.61	0.00599141	117.61	-0.03785032	117.61	-0.07625409	117.61	-0.06448177	117.61	-0.03799888	117.6	-0.1441774	117.6	-0.1797164	117.6	-0.1602904	117.6	-0.1643312	117.6	-0.1468138	117.6	-0.1446711	117.6	-0.1337152	117.6	-0.09564789
117.81	-0.1052091	117.81	-0.09322352	117.81	-0.0275022	117.81	0.00544044	117.81	-0.03856374	117.81	-0.07704901	117.81	-0.06196984	117.81	-0.04308202	117.8	-0.1421823	117.8	-0.1788214	117.8	-0.1598842	117.8	-0.1619129	117.8	-0.1461442	117.8	-0.1424574	117.8	-0.1316362	117.8	-0.1003775
118.01	-0.1015605	118.01	-0.09496979	118.01	-0.02481634	118.01	0.0028652	118.01	-0.04285997	118.01	-0.07730595	118.01	-0.06134126	118.01	-0.04036466	118	-0.1420607	118	-0.1759808	118	-0.1600315	118	-0.167942	118	-0.1498671	118	-0.1433739	118	-0.1354935	118	-0.09643859
118.21	-0.1064669	118.21	-0.08984112	118.21	-0.02721507	118.21	0.00534036	118.21	-0.03882343	118.21	-0.07095424	118.21	-0.0621663	118.21	-0.04060831	118.2	-0.1417617	118.2	-0.1791459	118.2	-0.1621416	118.2	-0.1621878	118.2	-0.1493497	118.2	-0.1437683	118.2	-0.1327011	118.2	-0.0958038
118.41	-0.1039191	118.41	-0.09278707	118.41	-0.02749941	118.41	0.00947323	118.41	-0.04375412	118.41	-0.07184643	118.41	-0.06197089	118.41	-0.04401702	118.4	-0.1462962	118.4	-0.1803195	118.4	-0.159132	118.4	-0.1626742	118.4	-0.1509492	118.4	-0.1492099	118.4	-0.1265337	118.4	-0.1021353
118.61	-0.1068765	118.61	-0.09245032	118.61	-0.02448116	118.61	0.00934876	118.61	-0.03830641	118.61	-0.07339514	118.61	-0.05824224	118.61	-0.03802237	118.6	-0.1443543	118.6	-0.174978	118.6	-0.1596759	118.6	-0.1616115	118.6	-0.1459868	118.6	-0.1380685	118.6	-0.1332496	118.6	-0.09947108
118.81	-0.1029318	118.81	-0.09119792	118.81	-0.02703568	118.81	0.00587242	118.81	-0.03643774	118.81	-0.07293426	118.81	-0.06269157	118.81	-0.04094452	118.8	-0.1386086	118.8	-0.1774843	118.8	-0.1604198	118.8	-0.1609454	118.8	-0.1510628	118.8	-0.1487212	118.8	-0.1302248	118.8	-0.09399731
119.01	-0.1066763	119.01	-0.08636255	119.01	-0.02653349	119.01	0.00853818	119.01	-0.03795633	119.01	-0.07194031	119.01	-0.06602605	119.01	-0.03941958	119	-0.1444535	119	-0.1767114	119	-0.1567592	119	-0.1642571	119	-0.1513397	119	-0.1428154	119	-0.1320625	119	-0.09739447
119.21	-0.1016852	119.21	-0.09161707	119.21	-0.02346984	119.21	0.00408229	119.21	-0.03939011	119.21	-0.07033265	119.21	-0.06211232	119.21	-0.03759918	119.2	-0.1433759	119.2	-0.1784713	119.2	-0.156718	119.2	-0.1614821	119.2	-0.1468526	119.2	-0.1397053	119.2	-0.1291838	119.2	-0.09371889
119.41	-0.10196	119.41	-0.09069318	119.41	-0.02586401	119.41	0.00642731	119.41	-0.0381581	119.41	-0.07047115	119.41	-0.05842156	119.41	-0.03474798	119.4	-0.1415134	119.4	-0.1745509	119.4	-0.1561822	119.4	-0.1644752	119.4	-0.1485593	119.4	-0.1446363	119.4	-0.1285174	119.4	-0.1001448
119.61	-0.1011804	119.61	-0.08833416	119.61	-0.02203094	119.61	0.00543441	119.61	-0.03981305	119.61	-0.07629266	119.61	-0.05947075	119.61	-0.0382033	119.6	-0.1406263	119.6	-0.1718136	119.6	-0.159143	119.6	-0.162487	119.6	-0.147012	119.6	-0.1450151	119.6	-0.1269561	119.6	-0.09746336
119.81	-0.1037884	119.81	-0.09133963	119.81	-0.02310177	119.81	0.00958904	119.81	-0.03525977	119.81	-0.06760573	119.81	-0.05299502	119.81	-0.03961665	119.8	-0.1418917	119.8	-0.1711279	119.8	-0.1599707	119.8	-0.1612555	119.8	-0.1473317	119.8	-0.1396179	119.8	-0.1327913	119.8	-0.09268612
120.01	-0.1008754	120.01	-0.08627204	120.01	-0.0218854	120.01	0.01092871	120.01	-0.03720323	120.01	-0.06847948	120.01	-0.05597841	120.01	-0.03311154	120	-0.1419975	120	-0.169393	120	-0.1546964	120	-0.162753	120	-0.1540967	120	-0.1369963	120	-0.1273361	120	-0.09500542
120.21	-0.1059081	120.21	-0.0856628	120.21	-0.02159879	120.21	0.00898284	120.21	-0.03475171	120.21	-0.070497	120.21	-0.05850711	120.21	-0.03522452	120.2	-0.1444876	120.2	-0.173291	120.2	-0.1580317	120.2	-0.1603848	120.2	-0.1456428	120.2	-0.1378729	120.2	-0.1300665	120.2	-0.09447956
120.41	-0.102796	120.41	-0.08721242	120.41	-0.02193158	120.41	0.00935358	120.41	-0.0362303	120.41	-0.06884813	120.41	-0.05605802	120.41	-0.03550013	120.4	-0.1532829	120.4	-0.1700112	120.4	-0.158171	120.4	-0.1563045	120.4	-0.1494337	120.4	-0.1402091	120.4	-0.1303651	120.4	-0.09469329
120.61	-0.09940813	120.61	-0.08570924	120.61	-0.02423093	120.61	0.00757024	120.61	-0.03407725	120.61	-0.0706506	120.61	-0.05843582	120.61	-0.03772318	120.6	-0.1391001	120.6	-0.1738684	120.6	-0.1560181	120.6	-0.158597	120.6	-0.1484365	120.6	-0.1401241	120.6	-0.1239866	120.6	-0.09632411
120.81	-0.09820417	120.81	-0.0894281	120.81	-0.02083708	120.81	0.00705428	120.81	-0.03008387	120.81	-0.06886657	120.81	-0.05547575	120.81	-0.03850225	120.8	-0.1370918	120.8	-0.1684974	120.8	-0.1581862	120.8	-0.1626477	120.8	-0.1448621	120.8	-0.1364354	120.8	-0.1252686	120.8	-0.09578098
121.01	-0.09513158	121.01	-0.08307794	121.01	-0.01917534	121.01	0.00892368	121.01	-0.03454508	121.01	-0.06997157	121.01	-0.05446427	121.01	-0.03502355	121	-0.1363858	121	-0.1723325	121	-0.1589024	121	-0.1580357	121	-0.1446445	121	-0.1391816	121	-0.1276665	121	-0.09728828
121.21	-0.09829009	121.21	-0.08621345	121.21	-0.01989569	121.21	0.01109879	121.21	-0.0334446	121.21	-0.06817705	121.21	-0.05800343	121.21	-0.037777	121.2	-0.1390701	121.2	-0.1686387	121.2	-0.1527978	121.2	-0.161882	121.2	-0.1472999	121.2	-0.1397976	121.2	-0.1314186	121.2	-0.09155859
121.41	-0.1017222	121.41	-0.08712652	121.41	-0.0221333	121.41	0.01192276	121.41	-0.03061507	121.41	-0.07040907	121.41	-0.05800299	121.41	-0.03353085	121.4	-0.1404787	121.4	-0.1746449	121.4	-0.1576521	121.4	-0.1589555	121.4	-0.1466311	121.4	-0.1366283	121.4	-0.1220209	121.4	-0.0946233
121.61	-0.09921055	121.61	-0.08572284	121.61	-0.01800129	121.61	0.01221092	121.61	-0.03333749	121.61	-0.06255765	121.61	-0.05565272	121.61	-0.03394911	121.6	-0.1438007	121.6	-0.1733587	121.6	-0.1537243	121.6	-0.1576538	121.6	-0.1453486	121.6	-0.1385504	121.6	-0.1299763	121.6	-0.09306276
121.81	-0.09615994	121.81	-0.08615494	121.81	-0.01870107	121.81	0.01207391	121.81	-0.03305474	121.81	-0.06337406	121.81	-0.05947478	121.81	-0.03461867	121.8	-0.1417707	121.8	-0.1718537	121.8	-0.157363	121.8	-0.1631	121.8	-0.1447031	121.8	-0.1399746	121.8	-0.1291678	121.8	-0.09391949
122.01	-0.09797353	122.01	-0.08352514	122.01	-0.01791159	122.01	0.01136622	122.01	-0.03228609	122.01	-0.06605061	122.01	-0.05730245	122.01	-0.03318069	122	-0.1381828	122	-0.1667015	122	-0.1600372	122	-0.1573332	122	-0.1475855	122	-0.1415875	122	-0.1270649	122	-0.09598275
122.21	-0.09975399	122.21	-0.08497722	122.21	-0.02131858	122.21	0.01113198	122.21	-0.02958655	122.21	-0.06658297	122.21	-0.05635514	122.21	-0.03320901	122.2	-0.144926	122.2	-0.1696675	122.2	-0.1552173	122.2	-0.1575294	122.2	-0.1446327	122.2	-0.1354498	122.2	-0.1254202	122.2	-0.09614494
122.41	-0.09623473	122.41	-0.07978947	122.41	-0.01888054	122.41	0.01179587	122.41	-0.02628252	122.41	-0.06351924	122.41	-0.05242296	122.41	-0.03099705	122.4	-0.1441104	122.4	-0.1738378	122.4	-0.1528477	122.4	-0.155286	122.4	-0.1453184	122.4	-0.1391797	122.4	-0.1276212	122.4	-0.09366477
122.61	-0.09319553	122.61	-0.08504827	122.61	-0.01926492	122.61	0.01615346	122.61	-0.03264689	122.61	-0.06482413	122.61	-0.05233841	122.61	-0.02820051	122.6	-0.1403158	122.6	-0.1765098	122.6	-0.1572267	122.6	-0.1543781	122.6	-0.1417398	122.6	-0.1368911	122.6	-0.1244972	122.6	-0.09363232
122.81	-0.09424701	122.81	-0.08416966	122.81	-0.01489554	122.81	0.01267133	122.81	-0.0276669	122.81	-0.06295	122.81	-0.05494773	122.81	-0.02934138	122.8	-0.1379219	122.8	-0.1693669	122.8	-0.1537181	122.8	-0.1641367	122.8	-0.1431098	122.8	-0.140646	122.8	-0.1257996	122.8	-0.09491202
123.01	-0.09798668	123.01	-0.08110046	123.01	-0.02068956	123.01	0.01084391	123.01	-0.02476168	123.01	-0.06169811	123.01	-0.05081392	123.01	-0.02879461	123	-0.1421762	123	-0.1698108	123	-0.1544748	123	-0.1576341	123	-0.1427428	123	-0.1368457	123	-0.1312581	123	-0.09234783
123.21	-0.09235053	123.21	-0.08248382	123.21	-0.01863267	123.21	0.01941755	123.21	-0.02515324	123.21	-0.06166536	123.21	-0.05003772	123.21	-0.03039121	123.2	-0.1380377	123.2	-0.168838	123.2	-0.1515342	123.2	-0.1547452	123.2	-0.141787	123.2	-0.1383901	123.2	-0.1258121	123.2	-0.08779186
123.41	-0.0927685	123.41	-0.07956245	123.41	-0.01636062	123.41	0.01362332	123.41	-0.0305748	123.41	-0.06021138	123.41	-0.04944224	123.41	-0.02963435	123.4	-0.1356078	123.4	-0.1665264	123.4	-0.1578137	123.4	-0.1572245	123.4	-0.1475731	123.4	-0.1354615	123.4	-0.125285	123.4	-0.08975819
123.61	-0.09587888	123.61	-0.08099945	123.61	-0.02059493	123.61	0.01569327	123.61	-0.02746463	123.61	-0.06299522	123.61	-0.05618664	123.61	-0.03165096	123.6	-0.1390247	123.6	-0.1657468	123.6	-0.1526758	123.6	-0.1550136	123.6	-0.1425433	123.6	-0.1387018	123.6	-0.1231182	123.6	-0.09608328
123.81	-0.09217414	123.81	-0.08219635	123.81	-0.01576395	123.81	0.01605287	123.81	-0.02881974	123.81	-0.05835601	123.81	-0.05399143	123.81	-0.03004625	123.8	-0.1370393	123.8	-0.1770718	123.8	-0.1498539	123.8	-0.1551966	123.8	-0.145679	123.8	-0.138765	123.8	-0.1237648	123.8	-0.08606912
124.01	-0.09225339	124.01	-0.08177511	124.01	-0.01402833	124.01	0.01918647	124.01	-0.02709111	124.01	-0.05806011	124.01	-0.04891903	124.01	-0.0324358	124	-0.133235	124	-0.1674107	124	-0.1503113	124	-0.1565525	124	-0.1444118	124	-0.1384038	124	-0.1235708	124	-0.08938012
124.21	-0.09238709	124.21	-0.07766116	124.21	-0.01415662	124.21	0.01864361	124.21	-0.02801295	124.21	-0.06193522	124.21	-0.05051048	124.21	-0.02540744	124.2	-0.1403281	124.2	-0.169305	124.2	-0.1530917	124.2	-0.1504847	124.2	-0.1422761	124.2	-0.1344131	124.2	-0.1208676	124.2	-0.09074383
124.41	-0.09046987	124.41	-0.08344448	124.41	-0.01756968	124.41	0.01553088	124.41	-0.02859219	124.41	-0.06249636	124.41	-0.04873132	124.41	-0.03048237	124.4	-0.1371926	124.4	-0.1685499	124.4	-0.1551342	124.4	-0.1531101	124.4	-0.1437217	124.4	-0.1378038	124.4	-0.124509	124.4	-0.0876057
124.61	-0.09487055	124.61	-0.07709455	124.61	-0.01122928	124.61	0.01436889	124.61	-0.02931224	124.61	-0.06405234	124.61	-0.04935735	124.61	-0.02939833	124.6	-0.1355569	124.6	-0.1652036	124.6	-0.1536994	124.6	-0.1602478	124.6	-0.1383595	124.6	-0.1326348	124.6	-0.1251804	124.6	-0.09381922
124.81	-0.09095345	124.81	-0.08031173	124.81	-0.01514121	124.81	0.01803415	124.81	-0.02267922	124.81	-0.0611876	124.81	-0.05200841	124.81	-0.02684566	124.8	-0.1375696	124.8	-0.1660452	124.8	-0.151336	124.8	-0.1542614	124.8	-0.1380141	124.8	-0.1372644	124.8	-0.1268014	124.8	-0.09125213
125.01	-0.08896387	125.01	-0.07835529	125.01	-0.01618437	125.01	0.01735659	125.01	-0.02823732	125.01	-0.05979008	125.01	-0.04887591	125.01	-0.02812899	125	-0.1358548	125	-0.1719575	125	-0.1514698	125	-0.1548471	125	-0.138422	125	-0.1340876	125	-0.1235019	125	-0.08967177
125.21	-0.0891481	125.21	-0.08198305	125.21	-0.01372754	125.21	0.01694405	125.21	-0.02510295	125.21	-0.06015888	125.21	-0.04875188	125.21	-0.02393367	125.2	-0.1334284	125.2	-0.1642356	125.2	-0.1476662	125.2	-0.1547956	125.2	-0.1349705	125.2	-0.1363986	125.2	-0.1232506	125.2	-0.08951398
125.41	-0.08923482	125.41	-0.07455139	125.41	-0.01310717	125.41	0.01689597	125.41	-0.02637343	125.41	-0.05779202	125.41	-0.04857487	125.41	-0.02373009	125.4	-0.1402678	125.4	-0.1662592	125.4	-0.1475681	125.4	-0.1530748	125.4	-0.1430465	125.4	-0.1378234	125.4	-0.1221191	125.4	-0.09243318
125.61	-0.09122702	125.61	-0.08146931	125.61	-0.0125917	125.61	0.0184894	125.61	-0.02542963	125.61	-0.06038344	125.61	-0.0517929	125.61	-0.02422004	125.6	-0.13456	125.6	-0.1641257	125.6	-0.151794	125.6	-0.1533089	125.6	-0.1340285	125.6	-0.1312131	125.6	-0.1217412	125.6	-0.09003031
125.81	-0.09224696	125.81	-0.07685941	125.81	-0.01258187	125.81	0.01730495	125.81	-0.01921608	125.81	-0.05947066	125.81	-0.04821549	125.81	-0.0232452	125.8	-0.1313019	125.8	-0.1620555	125.8	-0.1517642	125.8	-0.1531243	125.8	-0.1398249	125.8	-0.1330667	125.8	-0.1197752	125.8	-0.0856542
126.01	-0.08936659	126.01	-0.0779516	126.01	-0.01310541	126.01	0.01989013	126.01	-0.02276846	126.01	-0.05732018	126.01	-0.04815539	126.01	-0.02798752	126	-0.1314071	126	-0.1668193	126	-0.1486839	126	-0.1572392	126	-0.1407847	126	-0.1305	126	-0.1206951	126	-0.08371241
126.21	-0.09195311	126.21	-0.07734497	126.21	-0.01517565	126.21	0.01720382	126.21	-0.02529165	126.21	-0.05414766	126.21	-0.04777461	126.21	-0.02153269	126.2	-0.1304418	126.2	-0.1616362	126.2	-0.151553	126.2	-0.1557199	126.2	-0.134308	126.2	-0.1300855	126.2	-0.1254312	126.2	-0.08615485
126.41	-0.08801299	126.41	-0.08042805	126.41	-0.012863	126.41	0.02020441	126.41	-0.01965028	126.41	-0.06186584	126.41	-0.04943028	126.41	-0.02549854	126.4	-0.1320468	126.4	-0.1624571	126.4	-0.1462627	126.4	-0.1557662	126.4	-0.1402645	126.4	-0.1297352	126.4	-0.1263635	126.4	-0.08898244
126.61	-0.09006439	126.61	-0.0733402	126.61	-0.01235701	126.61	0.02043709	126.61	-0.02339331	126.61	-0.05832689	126.61	-0.04463017	126.61	-0.02450413	126.6	-0.1365206	126.6	-0.1646523	126.6	-0.1493118	126.6	-0.1549492	126.6	-0.1365898	126.6	-0.1333127	126.6	-0.1231345	126.6	-0.08553566
126.81	-0.0905135	126.81	-0.07743248	126.81	-0.01468975	126.81	0.02401294	126.81	-0.02685279	126.81	-0.05829993	126.81	-0.04495448	126.81	-0.02139334	126.8	-0.1290106	126.8	-0.1660941	126.8	-0.1521168	126.8	-0.1548241	126.8	-0.140522	126.8	-0.1299412	126.8	-0.1151057	126.8	-0.09084976
127.01	-0.08543368	127.01	-0.07574508	127.01	-0.00800749	127.01	0.01961549	127.01	-0.02235815	127.01	-0.05409914	127.01	-0.04865495	127.01	-0.02159238	127	-0.1292681	127	-0.1650664	127	-0.1496728	127	-0.1549328	127	-0.1332185	127	-0.131805	127	-0.1245228	127	-0.08232451
127.21	-0.087351	127.21	-0.07531288	127.21	-0.0080786	127.21	0.02154361	127.21	-0.02181849	127.21	-0.05469181	127.21	-0.04697016	127.21	-0.02113277	127.2	-0.1367219	127.2	-0.1630345	127.2	-0.1480958	127.2	-0.154658	127.2	-0.1365571	127.2	-0.1346473	127.2	-0.1180461	127.2	-0.08630561
127.41	-0.08799234	127.41	-0.0734161	127.41	-0.01027481	127.41	0.02267422	127.41	-0.01762394	127.41	-0.05886284	127.41	-0.04231746	127.41	-0.02681207	127.4	-0.1294564	127.4	-0.1666058	127.4	-0.148418	127.4	-0.1577442	127.4	-0.1383091	127.4	-0.1305399	127.4	-0.1208881	127.4	-0.08539855
127.61	-0.09187669	127.61	-0.07589057	127.61	-0.00872198	127.61	0.02097921	127.61	-0.02290865	127.61	-0.05520632	127.61	-0.04565838	127.61	-0.02493595	127.6	-0.133553	127.6	-0.163536	127.6	-0.1479516	127.6	-0.1530312	127.6	-0.1348767	127.6	-0.1377542	127.6	-0.1163428	127.6	-0.08254468
127.81	-0.08533935	127.81	-0.07432035	127.81	-0.00757116	127.81	0.0230217	127.81	-0.01861962	127.81	-0.05229931	127.81	-0.04637279	127.81	-0.02649334	127.8	-0.1342609	127.8	-0.1593507	127.8	-0.1490366	127.8	-0.155255	127.8	-0.1378264	127.8	-0.1295449	127.8	-0.1225031	127.8	-0.08727054
128.01	-0.08570816	128.01	-0.07411246	128.01	-0.01056074	128.01	0.02051661	128.01	-0.01707739	128.01	-0.05511787	128.01	-0.04216392	128.01	-0.02369502	128	-0.1380726	128	-0.1640546	128	-0.1485545	128	-0.1504058	128	-0.1340736	128	-0.1275786	128	-0.1199056	128	-0.08273651
128.21	-0.08877369	128.21	-0.07258314	128.21	-0.00937841	128.21	0.02697404	128.21	-0.01760947	128.21	-0.05219625	128.21	-0.04607569	128.21	-0.01850062	128.2	-0.130771	128.2	-0.1661128	128.2	-0.1474135	128.2	-0.1465923	128.2	-0.1358295	128.2	-0.1306195	128.2	-0.1218667	128.2	-0.08376936
128.41	-0.08806194	128.41	-0.07090045	128.41	-0.00859721	128.41	0.0223422	128.41	-0.02079863	128.41	-0.05653563	128.41	-0.04178536	128.41	-0.02311553	128.4	-0.1322306	128.4	-0.165206	128.4	-0.1492167	128.4	-0.148681	128.4	-0.1388604	128.4	-0.1261869	128.4	-0.1198154	128.4	-0.08690997
128.61	-0.08795178	128.61	-0.07000494	128.61	-0.00711858	128.61	0.02292623	128.61	-0.01825935	128.61	-0.0558172	128.61	-0.04597322	128.61	-0.02088919	128.6	-0.1344529	128.6	-0.1661669	128.6	-0.1481714	128.6	-0.1522294	128.6	-0.1374589	128.6	-0.1304424	128.6	-0.1195282	128.6	-0.08723439
128.81	-0.08234731	128.81	-0.06958243	128.81	-0.00945412	128.81	0.02382173	128.81	-0.0198987	128.81	-0.05383401	128.81	-0.04526317	128.81	-0.01776101	128.8	-0.1343397	128.8	-0.1629987	128.8	-0.1469028	128.8	-0.1479381	128.8	-0.1373739	128.8	-0.1293938	128.8	-0.1209484	128.8	-0.09113936
129.01	-0.08563448	129.01	-0.07260691	129.01	-0.00753854	129.01	0.02590352	129.01	-0.01835873	129.01	-0.05751503	129.01	-0.04026874	129.01	-0.02041619	129	-0.1308046	129	-0.1651213	129	-0.1449109	129	-0.1498739	129	-0.1332033	129	-0.1348835	129	-0.1184446	129	-0.08603133
129.21	-0.07989627	129.21	-0.06822516	129.21	-0.00916703	129.21	0.02249587	129.21	-0.0159269	129.21	-0.05492195	129.21	-0.04126287	129.21	-0.01864113	129.2	-0.1323921	129.2	-0.1548515	129.2	-0.1502905	129.2	-0.1502476	129.2	-0.1332758	129.2	-0.1286179	129.2	-0.1202653	129.2	-0.0887122
129.41	-0.08619653	129.41	-0.07076982	129.41	-0.01079502	129.41	0.02391166	129.41	-0.02502789	129.41	-0.05484824	129.41	-0.04088559	129.41	-0.01774029	129.4	-0.1261425	129.4	-0.1607579	129.4	-0.1457146	129.4	-0.1503042	129.4	-0.1309775	129.4	-0.1271206	129.4	-0.1168779	129.4	-0.08219875
129.61	-0.08437682	129.61	-0.0703854	129.61	-0.00413329	129.61	0.02373908	129.61	-0.01606033	129.61	-0.05216694	129.61	-0.04473596	129.61	-0.01952235	129.6	-0.1314421	129.6	-0.1596057	129.6	-0.1453122	129.6	-0.1504916	129.6	-0.1312529	129.6	-0.1334472	129.6	-0.1188986	129.6	-0.08799184
129.81	-0.08239903	129.81	-0.06581368	129.81	-0.00171679	129.81	0.02747821	129.81	-0.01852692	129.81	-0.0492005	129.81	-0.04301911	129.81	-0.01381146	129.8	-0.1307807	129.8	-0.1601011	129.8	-0.147989	129.8	-0.1471954	129.8	-0.133145	129.8	-0.1268117	129.8	-0.1177023	129.8	-0.08202658
130.01	-0.08550274	130.01	-0.07123003	130.01	-0.0031169	130.01	0.02118301	130.01	-0.01410764	130.01	-0.05191227	130.01	-0.04430183	130.01	-0.01732008	130	-0.1293829	130	-0.1586888	130	-0.1475351	130	-0.1477605	130	-0.1299058	130	-0.1255209	130	-0.1182326	130	-0.08718147
130.21	-0.08090296	130.21	-0.07270604	130.21	-0.00936121	130.21	0.02221233	130.21	-0.01919689	130.21	-0.05123467	130.21	-0.04189467	130.21	-0.01908373	130.2	-0.1287138	130.2	-0.1587483	130.2	-0.1460023	130.2	-0.1488851	130.2	-0.1329782	130.2	-0.125261	130.2	-0.1161473	130.2	-0.08140961
130.41	-0.08013306	130.41	-0.07083958	130.41	-0.00561857	130.41	0.02977585	130.41	-0.01648998	130.41	-0.05194901	130.41	-0.04247398	130.41	-0.01647079	130.4	-0.1291721	130.4	-0.1622142	130.4	-0.1430898	130.4	-0.1430417	130.4	-0.1300141	130.4	-0.1307553	130.4	-0.1216576	130.4	-0.08383836
130.61	-0.08291724	130.61	-0.07259782	130.61	-0.00048243	130.61	0.02771308	130.61	-0.01504574	130.61	-0.04997352	130.61	-0.04212999	130.61	-0.01517143	130.6	-0.1313664	130.6	-0.1640775	130.6	-0.1430095	130.6	-0.1487378	130.6	-0.1325243	130.6	-0.1275596	130.6	-0.1171614	130.6	-0.08514566
130.81	-0.08025515	130.81	-0.06345343	130.81	-0.00817908	130.81	0.02648217	130.81	-0.0173266	130.81	-0.04997359	130.81	-0.04000329	130.81	-0.01629357	130.8	-0.1294075	130.8	-0.1604369	130.8	-0.1467081	130.8	-0.1485851	130.8	-0.1314523	130.8	-0.1226086	130.8	-0.1113843	130.8	-0.08825677
131.01	-0.0813029	131.01	-0.07061199	131.01	-0.00587206	131.01	0.02751758	131.01	-0.01391853	131.01	-0.05260902	131.01	-0.04331065	131.01	-0.02018626	131	-0.1328379	131	-0.1565041	131	-0.1437604	131	-0.1489889	131	-0.1350223	131	-0.1272993	131	-0.113976	131	-0.08040755
131.21	-0.08008689	131.21	-0.07252228	131.21	-0.00420132	131.21	0.03118502	131.21	-0.01782078	131.21	-0.04719843	131.21	-0.03797145	131.21	-0.016313	131.2	-0.1329154	131.2	-0.161852	131.2	-0.1424758	131.2	-0.1470927	131.2	-0.1355501	131.2	-0.1250125	131.2	-0.1197167	131.2	-0.07929037
131.41	-0.0804055	131.41	-0.06697428	131.41	-0.00757714	131.41	0.02930821	131.41	-0.01391353	131.41	-0.05179978	131.41	-0.03641736	131.41	-0.01307244	131.4	-0.1293762	131.4	-0.1602608	131.4	-0.1433922	131.4	-0.1476684	131.4	-0.1331517	131.4	-0.1290574	131.4	-0.1162274	131.4	-0.08285128
131.61	-0.08205814	131.61	-0.06687408	131.61	-0.00544571	131.61	0.02952583	131.61	-0.01118623	131.61	-0.05105711	131.61	-0.03872312	131.61	-0.0144242	131.6	-0.1259014	131.6	-0.1587984	131.6	-0.1416276	131.6	-0.1490285	131.6	-0.1288368	131.6	-0.1255019	131.6	-0.1128896	131.6	-0.08481582
131.81	-0.08289801	131.81	-0.06832092	131.81	-0.0031596	131.81	0.02313992	131.81	-0.01697577	131.81	-0.0471563	131.81	-0.04289185	131.81	-0.01403898	131.8	-0.129753	131.8	-0.1632963	131.8	-0.1402617	131.8	-0.1455761	131.8	-0.1286466	131.8	-0.1261964	131.8	-0.1166656	131.8	-0.0844326
132.01	-0.07668597	132.01	-0.06221683	132.01	-0.00495935	132.01	0.02760324	132.01	-0.0086525	132.01	-0.04636486	132.01	-0.03869842	132.01	-0.01605984	132	-0.1295919	132	-0.1576938	132	-0.1437859	132	-0.144636	132	-0.1359521	132	-0.1270898	132	-0.1105753	132	-0.08657689
132.21	-0.07690704	132.21	-0.06353284	132.21	-0.00531582	132.21	0.02788177	132.21	-0.01538232	132.21	-0.0481473	132.21	-0.03965789	132.21	-0.0135503	132.2	-0.1294392	132.2	-0.1563195	132.2	-0.1391941	132.2	-0.1460341	132.2	-0.1302391	132.2	-0.1228435	132.2	-0.1156491	132.2	-0.08095273
132.41	-0.07768283	132.41	-0.067653	132.41	-0.00256196	132.41	0.02909044	132.41	-0.00815368	132.41	-0.05029448	132.41	-0.04026245	132.41	-0.01363826	132.4	-0.1315876	132.4	-0.1553761	132.4	-0.1418875	132.4	-0.1487958	132.4	-0.1290179	132.4	-0.1220901	132.4	-0.1181883	132.4	-0.08685858
132.61	-0.08060057	132.61	-0.06719396	132.61	-0.00715011	132.61	0.03255593	132.61	-0.00827648	132.61	-0.04509725	132.61	-0.03523286	132.61	-0.01563905	132.6	-0.1294626	132.6	-0.153976	132.6	-0.1430612	132.6	-0.1460365	132.6	-0.1267541	132.6	-0.1272067	132.6	-0.1169925	132.6	-0.0803487
132.81	-0.07928456	132.81	-0.0692502	132.81	-0.00454283	132.81	0.0303184	132.81	-0.01266803	132.81	-0.04925923	132.81	-0.03545719	132.81	-0.01367994	132.8	-0.1249341	132.8	-0.1593558	132.8	-0.1402259	132.8	-0.1475813	132.8	-0.129433	132.8	-0.128677	132.8	-0.116643	132.8	-0.08871977
133.01	-0.07393318	133.01	-0.06600131	133.01	-0.0011138	133.01	0.02861628	133.01	-0.01134253	133.01	-0.04473227	133.01	-0.03732676	133.01	-0.01436609	133	-0.1288753	133	-0.1579978	133	-0.1435174	133	-0.1424106	133	-0.1312252	133	-0.1259542	133	-0.1110917	133	-0.08330888
133.21	-0.07777462	133.21	-0.06425785	133.21	-0.00183352	133.21	0.03337247	133.21	-0.0142389	133.21	-0.04705709	133.21	-0.03845693	133.21	-0.01614795	133.2	-0.1254028	133.2	-0.1620671	133.2	-0.1401142	133.2	-0.147693	133.2	-0.1291052	133.2	-0.1243462	133.2	-0.1142253	133.2	-0.08451749
133.41	-0.08067119	133.41	-0.06364607	133.41	-0.0045321	133.41	0.0291382	133.41	-0.01279272	133.41	-0.04477219	133.41	-0.03960629	133.41	-0.0135721	133.4	-0.1284741	133.4	-0.1604984	133.4	-0.1444864	133.4	-0.1447703	133.4	-0.1295827	133.4	-0.1234744	133.4	-0.1103148	133.4	-0.0808755
133.61	-0.07879473	133.61	-0.06844913	133.61	0.00036288	133.61	0.03269084	133.61	-0.01274316	133.61	-0.04313771	133.61	-0.03825589	133.61	-0.0121169	133.6	-0.1311834	133.6	-0.1561832	133.6	-0.1402185	133.6	-0.1493591	133.6	-0.1245495	133.6	-0.1232295	133.6	-0.1133613	133.6	-0.0816874
133.81	-0.0800566	133.81	-0.06313696	133.81	-0.00053365	133.81	0.0321369	133.81	-0.01450492	133.81	-0.04617899	133.81	-0.03409509	133.81	-0.0158992	133.8	-0.1276525	133.8	-0.155309	133.8	-0.1426868	133.8	-0.1461117	133.8	-0.1300334	133.8	-0.1256474	133.8	-0.1103471	133.8	-0.08063598
134.01	-0.07822025	134.01	-0.06804042	134.01	0.0031532	134.01	0.03293251	134.01	-0.01262962	134.01	-0.04474165	134.01	-0.03469577	134.01	-0.01314856	134	-0.1291139	134	-0.1558099	134	-0.1394002	134	-0.1468914	134	-0.1319927	134	-0.1241375	134	-0.1105531	134	-0.08339606
134.21	-0.0747783	134.21	-0.06315003	134.21	0.00574448	134.21	0.03076268	134.21	-0.00764683	134.21	-0.04528814	134.21	-0.03061561	134.21	-0.0128253	134.2	-0.1258449	134.2	-0.155102	134.2	-0.1419124	134.2	-0.1455542	134.2	-0.1282083	134.2	-0.122747	134.2	-0.1157977	134.2	-0.08461178
134.41	-0.08096909	134.41	-0.06318274	134.41	-0.00190834	134.41	0.02981873	134.41	-0.01033473	134.41	-0.0450241	134.41	-0.03387387	134.41	-0.01243095	134.4	-0.1271374	134.4	-0.1504115	134.4	-0.1419163	134.4	-0.1443279	134.4	-0.13254	134.4	-0.1231468	134.4	-0.1134556	134.4	-0.07775903
134.61	-0.07698298	134.61	-0.06256895	134.61	0.00172217	134.61	0.02877514	134.61	-0.0078634	134.61	-0.04768078	134.61	-0.03827606	134.61	-0.00955152	134.6	-0.1271314	134.6	-0.1588628	134.6	-0.1427131	134.6	-0.1459294	134.6	-0.1291094	134.6	-0.1228261	134.6	-0.1126989	134.6	-0.0783724
134.81	-0.07625259	134.81	-0.06222818	134.81	0.00200997	134.81	0.03547781	134.81	-0.00680368	134.81	-0.04295231	134.81	-0.03527286	134.81	-0.00924441	134.8	-0.1273733	134.8	-0.1488644	134.8	-0.1392453	134.8	-0.1478999	134.8	-0.125022	134.8	-0.1208515	134.8	-0.1067835	134.8	-0.08087905
135.01	-0.07264888	135.01	-0.06137626	135.01	0.00057612	135.01	0.03560557	135.01	-0.01499735	135.01	-0.0472074	135.01	-0.03468642	135.01	-0.00917597	135	-0.124804	135	-0.1532595	135	-0.1405766	135	-0.1408914	135	-0.1304862	135	-0.1247177	135	-0.1121826	135	-0.07784389
135.21	-0.0757305	135.21	-0.06337836	135.21	0.0003725	135.21	0.03230411	135.21	-0.01030094	135.21	-0.04590681	135.21	-0.03375512	135.21	-0.01134843	135.2	-0.126239	135.2	-0.1557915	135.2	-0.143647	135.2	-0.1477493	135.2	-0.1290672	135.2	-0.1209724	135.2	-0.1159399	135.2	-0.08166338
135.41	-0.07214471	135.41	-0.06179663	135.41	0.00325192	135.41	0.03196806	135.41	-0.00981939	135.41	-0.04444303	135.41	-0.03285421	135.41	-0.00815046	135.4	-0.1293144	135.4	-0.1563818	135.4	-0.142097	135.4	-0.1464071	135.4	-0.1272476	135.4	-0.1240786	135.4	-0.1092767	135.4	-0.08375504
135.61	-0.07286073	135.61	-0.06030279	135.61	0.00141421	135.61	0.03411917	135.61	-0.00853959	135.61	-0.04299976	135.61	-0.03281108	135.61	-0.00581116	135.6	-0.1217227	135.6	-0.1541906	135.6	-0.1393883	135.6	-0.1438067	135.6	-0.1296161	135.6	-0.1228867	135.6	-0.1121281	135.6	-0.07830125
135.81	-0.07460839	135.81	-0.05987103	135.81	-0.00100641	135.81	0.03582273	135.81	-0.00391304	135.81	-0.04521398	135.81	-0.03660549	135.81	-0.01181158	135.8	-0.1208301	135.8	-0.1515648	135.8	-0.1422509	135.8	-0.1425179	135.8	-0.127262	135.8	-0.1185185	135.8	-0.1115156	135.8	-0.07841995
136.01	-0.06982442	136.01	-0.05656534	136.01	0.00384396	136.01	0.03447909	136.01	-0.00771706	136.01	-0.03909783	136.01	-0.03018648	136.01	-0.00842935	136	-0.1283281	136	-0.1574386	136	-0.1412504	136	-0.1474007	136	-0.1267932	136	-0.1212596	136	-0.11461	136	-0.08007465
136.21	-0.07381631	136.21	-0.0573761	136.21	-0.00018827	136.21	0.03797462	136.21	-0.00695796	136.21	-0.04301305	136.21	-0.03312635	136.21	-0.00909822	136.2	-0.1306184	136.2	-0.1520867	136.2	-0.1336741	136.2	-0.1431821	136.2	-0.1241895	136.2	-0.1211843	136.2	-0.114045	136.2	-0.07937618
136.41	-0.06775917	136.41	-0.05826119	136.41	-0.00455487	136.41	0.03144739	136.41	-0.00909491	136.41	-0.0402985	136.41	-0.03747967	136.41	-0.00771039	136.4	-0.1256452	136.4	-0.156499	136.4	-0.1398843	136.4	-0.1424877	136.4	-0.1257458	136.4	-0.1236994	136.4	-0.1136537	136.4	-0.08303383
136.61	-0.07384503	136.61	-0.06316374	136.61	0.00468104	136.61	0.035391	136.61	-0.00351732	136.61	-0.0419389	136.61	-0.02826501	136.61	-0.00746147	136.6	-0.1218196	136.6	-0.1512216	136.6	-0.1356902	136.6	-0.1381786	136.6	-0.1237473	136.6	-0.1208165	136.6	-0.1122923	136.6	-0.0790162
136.81	-0.06928235	136.81	-0.05794951	136.81	0.00366611	136.81	0.03649195	136.81	-0.00487596	136.81	-0.0467119	136.81	-0.03540384	136.81	-0.00811884	136.8	-0.1193136	136.8	-0.1516872	136.8	-0.1344022	136.8	-0.1415338	136.8	-0.1250742	136.8	-0.1219304	136.8	-0.1070939	136.8	-0.08004087
137.01	-0.07737193	137.01	-0.05404245	137.01	0.00496842	137.01	0.03726018	137.01	-0.00194759	137.01	-0.04452069	137.01	-0.03180543	137.01	-0.00612928	137	-0.1243124	137	-0.1538644	137	-0.1359469	137	-0.1423402	137	-0.1261457	137	-0.1222675	137	-0.1081305	137	-0.07578151
137.21	-0.07567595	137.21	-0.06033194	137.21	0.00091121	137.21	0.0374333	137.21	-0.00518435	137.21	-0.04258012	137.21	-0.02987692	137.21	-0.01261174	137.2	-0.125301	137.2	-0.1532618	137.2	-0.1396588	137.2	-0.1395731	137.2	-0.1229044	137.2	-0.1197512	137.2	-0.1122237	137.2	-0.07473075
137.41	-0.07250613	137.41	-0.05979885	137.41	0.00353785	137.41	0.03739316	137.41	-0.00733144	137.41	-0.03933389	137.41	-0.03142637	137.41	-0.00559036	137.4	-0.1278409	137.4	-0.1520992	137.4	-0.1397849	137.4	-0.1434195	137.4	-0.1215611	137.4	-0.1170999	137.4	-0.1163868	137.4	-0.08023117
137.61	-0.07397947	137.61	-0.05875455	137.61	0.00502725	137.61	0.03604013	137.61	-0.00686231	137.61	-0.04157773	137.61	-0.03048969	137.61	-0.01130866	137.6	-0.1240469	137.6	-0.1532086	137.6	-0.1381885	137.6	-0.1430872	137.6	-0.1245161	137.6	-0.1220791	137.6	-0.1113949	137.6	-0.07995029
137.81	-0.06790487	137.81	-0.05414959	137.81	0.01047309	137.81	0.03653211	137.81	-0.00435033	137.81	-0.04106036	137.81	-0.03243534	137.81	-0.00760317	137.8	-0.1252451	137.8	-0.1538292	137.8	-0.1374618	137.8	-0.1422304	137.8	-0.1254256	137.8	-0.1186626	137.8	-0.1101506	137.8	-0.07685613
138.01	-0.07248721	138.01	-0.05973323	138.01	0.00905872	138.01	0.03456397	138.01	-0.0002731	138.01	-0.04530964	138.01	-0.02866264	138.01	-0.0094274	138	-0.1222529	138	-0.1545682	138	-0.1400558	138	-0.1398598	138	-0.1191226	138	-0.1187244	138	-0.111308	138	-0.07245772
138.21	-0.0684676	138.21	-0.06153692	138.21	0.00596931	138.21	0.0368413	138.21	-0.00593092	138.21	-0.0429502	138.21	-0.02930681	138.21	-0.00858456	138.2	-0.1234418	138.2	-0.1517307	138.2	-0.1383842	138.2	-0.1432789	138.2	-0.1227507	138.2	-0.1185571	138.2	-0.1148786	138.2	-0.07486161
138.41	-0.06956397	138.41	-0.05970727	138.41	0.00662833	138.41	0.03840542	138.41	-0.00603295	138.41	-0.03777751	138.41	-0.02880711	138.41	-0.0071577	138.4	-0.1218492	138.4	-0.1532038	138.4	-0.1374635	138.4	-0.1434291	138.4	-0.1216286	138.4	-0.1173522	138.4	-0.1126388	138.4	-0.07643601
138.61	-0.07235575	138.61	-0.05456475	138.61	0.00835236	138.61	0.03792453	138.61	-0.00029647	138.61	-0.03564293	138.61	-0.0307272	138.61	-0.00884288	138.6	-0.1224643	138.6	-0.1522867	138.6	-0.1393551	138.6	-0.1391161	138.6	-0.1259544	138.6	-0.1167194	138.6	-0.1099761	138.6	-0.07465561
138.81	-0.06683115	138.81	-0.05748729	138.81	0.00647171	138.81	0.04119839	138.81	-0.0038097	138.81	-0.04029426	138.81	-0.03115429	138.81	-0.01108696	138.8	-0.1254546	138.8	-0.151176	138.8	-0.1362198	138.8	-0.1380663	138.8	-0.1280619	138.8	-0.1165328	138.8	-0.1071948	138.8	-0.06879372
139.01	-0.07119188	139.01	-0.05732568	139.01	0.00469231	139.01	0.03743385	139.01	-0.00517302	139.01	-0.04031316	139.01	-0.02411434	139.01	-0.00545988	139	-0.1198292	139	-0.1499263	139	-0.1374665	139	-0.1388442	139	-0.1238066	139	-0.115987	139	-0.1120432	139	-0.07691927
139.21	-0.06773315	139.21	-0.05928139	139.21	0.00964632	139.21	0.03733389	139.21	-0.00124414	139.21	-0.03616371	139.21	-0.03384801	139.21	-0.00240502	139.21	-0.1215868	139.21	-0.1521917	139.21	-0.1348376	139.21	-0.1403466	139.21	-0.1188433	139.21	-0.1174885	139.21	-0.1083355	139.21	-0.07522308
139.41	-0.06984833	139.41	-0.05828827	139.41	0.00692818	139.41	0.03201989	139.41	0.00214522	139.41	-0.03799301	139.41	-0.0288331	139.41	-0.002783	139.4	-0.117867	139.4	-0.1536544	139.4	-0.1370517	139.4	-0.1388791	139.4	-0.1233016	139.4	-0.1176934	139.4	-0.1083716	139.4	-0.07448194
139.61	-0.06664976	139.61	-0.05870639	139.61	0.00703594	139.61	0.036065	139.61	-0.00563519	139.61	-0.04006815	139.61	-0.03044297	139.61	-0.00244874	139.6	-0.1226226	139.6	-0.1485277	139.6	-0.1361182	139.6	-0.1411689	139.6	-0.1223299	139.6	-0.1173675	139.6	-0.1093618	139.6	-0.07541207
139.81	-0.07258911	139.81	-0.05867471	139.81	0.00777614	139.81	0.03446887	139.81	0.00301987	139.81	-0.0357057	139.81	-0.02042043	139.81	-0.00335644	139.8	-0.1167873	139.8	-0.1550104	139.8	-0.1383331	139.8	-0.1435255	139.8	-0.1247393	139.8	-0.1188822	139.8	-0.1089903	139.8	-0.07479886
140.01	-0.06789295	140.01	-0.05816456	140.01	0.00958155	140.01	0.04190344	140.01	-0.0012218	140.01	-0.03502758	140.01	-0.02225358	140.01	-0.00259162	140	-0.1205128	140	-0.1532602	140	-0.1340383	140	-0.1382864	140	-0.1235038	140	-0.1199309	140	-0.1053099	140	-0.07266348
140.21	-0.06790084	140.21	-0.05564731	140.21	0.00986825	140.21	0.04251599	140.21	0.00229219	140.21	-0.03642572	140.21	-0.02446811	140.21	-0.00428229	140.2	-0.1209718	140.2	-0.1507286	140.2	-0.1363943	140.2	-0.1359105	140.2	-0.1250553	140.2	-0.1215093	140.2	-0.1077181	140.2	-0.07252324
140.41	-0.06884003	140.41	-0.05228767	140.41	0.00747065	140.41	0.04051959	140.41	-0.00182735	140.41	-0.03115078	140.41	-0.02579227	140.41	-0.00016774	140.4	-0.1199821	140.4	-0.1519132	140.4	-0.1349596	140.4	-0.1395237	140.4	-0.1212657	140.4	-0.1193365	140.4	-0.1114718	140.4	-0.07817098
140.61	-0.07065208	140.61	-0.0512339	140.61	0.00654372	140.61	0.0421806	140.61	-0.00114496	140.61	-0.03773827	140.61	-0.02967151	140.61	-0.0029348	140.6	-0.119671	140.6	-0.1533428	140.6	-0.1350089	140.6	-0.1370195	140.6	-0.1218403	140.6	-0.1198377	140.6	-0.1112293	140.6	-0.07478956
140.81	-0.06290084	140.81	-0.05345146	140.81	0.00788618	140.81	0.03950367	140.81	-0.00031734	140.81	-0.03260858	140.81	-0.02509539	140.81	0.00191712	140.8	-0.1239668	140.8	-0.1487955	140.8	-0.1364845	140.8	-0.1444222	140.8	-0.1192615	140.8	-0.1180129	140.8	-0.1081408	140.8	-0.07783962
141.02	-0.06424134	141.02	-0.05558237	141.02	0.00447535	141.02	0.03862381	141.02	0.00456054	141.02	-0.03349224	141.02	-0.02486433	141.02	-0.00047374	141.01	-0.1205209	141.01	-0.1480162	141.01	-0.1371118	141.01	-0.139249	141.01	-0.1212786	141.01	-0.1195024	141.01	-0.1053874	141.01	-0.07765583
141.21	-0.06849039	141.21	-0.05188098	141.21	0.00695747	141.21	0.04371272	141.21	-0.0013902	141.21	-0.03568374	141.21	-0.02967857	141.21	-0.00334429	141.2	-0.1182499	141.2	-0.1480229	141.2	-0.1343631	141.2	-0.1372842	141.2	-0.1182279	141.2	-0.1182604	141.2	-0.1059396	141.2	-0.07369037
141.41	-0.06686161	141.41	-0.05206152	141.41	0.00715327	141.41	0.04007788	141.41	0.00557211	141.41	-0.03542348	141.41	-0.02335199	141.41	-0.00131168	141.4	-0.1181292	141.4	-0.1502407	141.4	-0.133408	141.4	-0.141097	141.4	-0.1200021	141.4	-0.1169382	141.4	-0.1081022	141.4	-0.07291424
141.61	-0.07051924	141.61	-0.05084739	141.61	0.01263229	141.61	0.04049937	141.61	0.00353337	141.61	-0.03505098	141.61	-0.02413882	141.61	-0.00045478	141.6	-0.1192487	141.6	-0.1470188	141.6	-0.1319974	141.6	-0.1364472	141.6	-0.1225725	141.6	-0.115407	141.6	-0.1146029	141.6	-0.07162371
141.81	-0.06567679	141.81	-0.05033763	141.81	0.01196201	141.81	0.04084058	141.81	0.00338195	141.81	-0.03495776	141.81	-0.02405017	141.81	-0.0032572	141.8	-0.1190201	141.8	-0.1461401	141.8	-0.1352115	141.8	-0.1401275	141.8	-0.117764	141.8	-0.1161785	141.8	-0.1030825	141.8	-0.07563026
142.01	-0.06871238	142.01	-0.05149924	142.01	0.01045104	142.01	0.04054217	142.01	-0.00023026	142.01	-0.0350791	142.01	-0.02303894	142.01	0.00055292	142	-0.1201742	142	-0.1509944	142	-0.1351545	142	-0.1375642	142	-0.1207444	142	-0.1165949	142	-0.1041407	142	-0.07208267
142.21	-0.06144008	142.21	-0.05386788	142.21	0.01218739	142.21	0.04310381	142.21	0.00250418	142.21	-0.03446995	142.21	-0.02439268	142.21	-0.00152426	142.2	-0.1215658	142.2	-0.1485321	142.2	-0.1346815	142.2	-0.1429298	142.2	-0.1228718	142.2	-0.1146306	142.2	-0.1084684	142.2	-0.0703371
142.41	-0.06531814	142.41	-0.05239207	142.41	0.01359148	142.41	0.03984018	142.41	0.0023451	142.41	-0.03246632	142.41	-0.02147827	142.41	-0.0002786	142.4	-0.1195763	142.4	-0.1459012	142.4	-0.1316231	142.4	-0.1405708	142.4	-0.1139168	142.4	-0.114452	142.4	-0.1039508	142.4	-0.07655471
142.61	-0.06519669	142.61	-0.05180433	142.61	0.01292848	142.61	0.04168281	142.61	0.00298053	142.61	-0.03372337	142.61	-0.02761093	142.61	-0.00049358	142.6	-0.1215835	142.6	-0.1469733	142.6	-0.1325011	142.6	-0.1355694	142.6	-0.1230418	142.6	-0.1109802	142.6	-0.1044012	142.6	-0.07286992
142.81	-0.06277164	142.81	-0.05448975	142.81	0.01020357	142.81	0.04418029	142.81	0.00269003	142.81	-0.03242454	142.81	-0.02405446	142.81	-0.00111112	142.8	-0.1195559	142.8	-0.1449707	142.8	-0.1292864	142.8	-0.1376318	142.8	-0.1164911	142.8	-0.1114506	142.8	-0.1069798	142.8	-0.07502725
143.01	-0.06803425	143.01	-0.05358117	143.01	0.00873473	143.01	0.04223804	143.01	0.00378901	143.01	-0.03047008	143.01	-0.02179625	143.01	0.00027687	143	-0.1201499	143	-0.1498344	143	-0.1286909	143	-0.1383007	143	-0.1188399	143	-0.1157561	143	-0.1051003	143	-0.07055264
143.21	-0.06542531	143.21	-0.05292174	143.21	0.01048964	143.21	0.04480524	143.21	0.00360609	143.21	-0.03537951	143.21	-0.0199017	143.21	-0.00117679	143.2	-0.1141227	143.2	-0.1484259	143.2	-0.1307934	143.2	-0.139025	143.2	-0.1192446	143.2	-0.1147948	143.2	-0.1081994	143.2	-0.07150759
143.41	-0.06609765	143.41	-0.05216911	143.41	0.01584231	143.41	0.04448063	143.41	0.00165345	143.41	-0.03242622	143.41	-0.0193992	143.41	0.00370593	143.4	-0.1215106	143.4	-0.1479986	143.4	-0.1349431	143.4	-0.1397566	143.4	-0.1183821	143.4	-0.1118924	143.4	-0.1058834	143.4	-0.07740065
143.61	-0.06376629	143.61	-0.04769024	143.61	0.01088626	143.61	0.04509786	143.61	0.00947764	143.61	-0.03548812	143.61	-0.02195891	143.61	0.00037642	143.6	-0.1201105	143.6	-0.1482264	143.6	-0.1315079	143.6	-0.1391369	143.6	-0.1154591	143.6	-0.1120438	143.6	-0.1062198	143.6	-0.0723877
143.81	-0.0657617	143.81	-0.05049835	143.81	0.01192026	143.81	0.03710578	143.81	0.00269993	143.81	-0.03224248	143.81	-0.02042488	143.81	0.00125605	143.8	-0.1145648	143.8	-0.1461475	143.8	-0.129279	143.8	-0.1370685	143.8	-0.1158771	143.8	-0.1155978	143.8	-0.1060325	143.8	-0.07525499
144.01	-0.06691036	144.01	-0.0534603	144.01	0.01170884	144.01	0.04561282	144.01	0.00836227	144.01	-0.03556047	144.01	-0.02302079	144.01	0.0019941	144	-0.1189729	144	-0.1477838	144	-0.1323356	144	-0.1380422	144	-0.1193865	144	-0.11298	144	-0.104583	144	-0.07111482
144.21	-0.06385641	144.21	-0.04875094	144.21	0.01919882	144.21	0.04750144	144.21	-0.00154624	144.21	-0.0268032	144.21	-0.02227359	144.21	0.0042182	144.2	-0.1144561	144.2	-0.1452436	144.2	-0.1350228	144.2	-0.1385624	144.2	-0.1187534	144.2	-0.113116	144.2	-0.1065241	144.2	-0.07061246
144.41	-0.06658253	144.41	-0.05147775	144.41	0.01416428	144.41	0.0429552	144.41	0.00178546	144.41	-0.02987028	144.41	-0.02297054	144.41	0.00869317	144.4	-0.1183556	144.4	-0.1487779	144.4	-0.131652	144.4	-0.1350641	144.4	-0.1141439	144.4	-0.1135024	144.4	-0.1024714	144.4	-0.07016346
144.61	-0.06179732	144.61	-0.05413528	144.61	0.00843535	144.61	0.05010246	144.61	0.00921582	144.61	-0.03325869	144.61	-0.01693613	144.61	0.00199554	144.6	-0.1194263	144.6	-0.1452044	144.6	-0.1353557	144.6	-0.1358419	144.6	-0.1216413	144.6	-0.1129507	144.6	-0.105788	144.6	-0.07503862
144.81	-0.05815359	144.81	-0.05288694	144.81	0.01716352	144.81	0.04371083	144.81	0.00457945	144.81	-0.03078488	144.81	-0.02307221	144.81	0.0030461	144.8	-0.1189219	144.8	-0.1487413	144.8	-0.1328463	144.8	-0.1356283	144.8	-0.1190495	144.8	-0.1128953	144.8	-0.1027647	144.8	-0.07420168
145.01	-0.06069357	145.01	-0.04766177	145.01	0.01493284	145.01	0.04664843	145.01	0.00630708	145.01	-0.03192064	145.01	-0.02220445	145.01	-0.00070326	145	-0.1136889	145	-0.1466068	145	-0.1313024	145	-0.1358211	145	-0.1197915	145	-0.1181332	145	-0.1028458	145	-0.07387447
145.21	-0.0633937	145.21	-0.05021495	145.21	0.01558052	145.21	0.0473378	145.21	0.00387689	145.21	-0.03534678	145.21	-0.02060313	145.21	0.0039938	145.2	-0.1157042	145.2	-0.1474355	145.2	-0.1302915	145.2	-0.1394467	145.2	-0.1136304	145.2	-0.1120236	145.2	-0.1019031	145.2	-0.06944652
145.41	-0.06230429	145.41	-0.04612279	145.41	0.01544125	145.41	0.04799625	145.41	0.00855169	145.41	-0.02950301	145.41	-0.01750801	145.41	0.00019573	145.4	-0.1183014	145.4	-0.1443426	145.4	-0.1328648	145.4	-0.1349635	145.4	-0.1128322	145.4	-0.1134814	145.4	-0.1051701	145.4	-0.06989671
145.61	-0.06337494	145.61	-0.05016826	145.61	0.01410591	145.61	0.04604816	145.61	0.01010436	145.61	-0.02561793	145.61	-0.02360694	145.61	0.00246885	145.6	-0.1149807	145.6	-0.1420156	145.6	-0.1337357	145.6	-0.138844	145.6	-0.1184649	145.6	-0.1165632	145.6	-0.1031567	145.6	-0.0710635
145.81	-0.05916139	145.81	-0.04902625	145.81	0.01550876	145.81	0.05038334	145.81	0.00810621	145.81	-0.03255982	145.81	-0.02413549	145.81	0.0069853	145.8	-0.1179207	145.8	-0.1430335	145.8	-0.1313736	145.8	-0.1362512	145.8	-0.1197677	145.8	-0.1107222	145.8	-0.1066991	145.8	-0.07174562
146.01	-0.0596053	146.01	-0.04889522	146.01	0.01559686	146.01	0.04689809	146.01	0.00997684	146.01	-0.02936443	146.01	-0.02078788	146.01	0.00002893	146	-0.1166605	146	-0.1422507	146	-0.1279871	146	-0.1334419	146	-0.1155961	146	-0.1128347	146	-0.1028633	146	-0.07282672
146.21	-0.06192326	146.21	-0.04934935	146.21	0.01781474	146.21	0.04596226	146.21	0.0058604	146.21	-0.02988793	146.21	-0.01791915	146.21	0.00422893	146.2	-0.115334	146.2	-0.1489565	146.2	-0.1293139	146.2	-0.1359887	146.2	-0.1135042	146.2	-0.1134454	146.2	-0.10317	146.2	-0.07497291
146.41	-0.05790744	146.41	-0.04896375	146.41	0.01375772	146.41	0.04986436	146.41	0.00711572	146.41	-0.02753628	146.41	-0.02248242	146.41	-0.00041595	146.4	-0.112787	146.4	-0.1481815	146.4	-0.1308132	146.4	-0.1330495	146.4	-0.119869	146.4	-0.1143364	146.4	-0.1038497	146.4	-0.07198071
146.61	-0.06045575	146.61	-0.04821949	146.61	0.01354536	146.61	0.04972504	146.61	0.0106825	146.61	-0.02774504	146.61	-0.02383158	146.61	0.00505913	146.6	-0.1146754	146.6	-0.1461427	146.6	-0.1303397	146.6	-0.131162	146.6	-0.1176007	146.6	-0.1074035	146.6	-0.103303	146.6	-0.0711066
146.81	-0.05951554	146.81	-0.04650127	146.81	0.01631416	146.81	0.04670011	146.81	0.0066466	146.81	-0.02827309	146.81	-0.01926892	146.81	0.00053818	146.8	-0.1146609	146.8	-0.1421211	146.8	-0.1309754	146.8	-0.1329917	146.8	-0.114305	146.8	-0.1121289	146.8	-0.1034957	146.8	-0.07145581
147.01	-0.05766496	147.01	-0.05007408	147.01	0.01996154	147.01	0.04805338	147.01	0.00759993	147.01	-0.02613666	147.01	-0.01636567	147.01	0.00411755	147	-0.1132243	147	-0.1458544	147	-0.1269213	147	-0.135546	147	-0.1208512	147	-0.1156329	147	-0.1014371	147	-0.07241847
147.21	-0.05586117	147.21	-0.04656571	147.21	0.01675797	147.21	0.04685062	147.21	0.01232095	147.21	-0.02706696	147.21	-0.02112586	147.21	0.00898905	147.2	-0.1161328	147.2	-0.1444137	147.2	-0.1279004	147.2	-0.1344839	147.2	-0.1161103	147.2	-0.1097605	147.2	-0.1018323	147.2	-0.0701725
147.41	-0.05721863	147.41	-0.04665601	147.41	0.01560446	147.41	0.04701396	147.41	0.00426422	147.41	-0.02759263	147.41	-0.02307368	147.41	0.00439141	147.4	-0.1154622	147.4	-0.1401635	147.4	-0.1262292	147.4	-0.1356285	147.4	-0.1104641	147.4	-0.1140839	147.4	-0.1030085	147.4	-0.06967992
147.61	-0.06160623	147.61	-0.04516994	147.61	0.01660335	147.61	0.04899397	147.61	0.0122429	147.61	-0.02713375	147.61	-0.02061713	147.61	0.00346234	147.6	-0.116914	147.6	-0.1447616	147.6	-0.1329528	147.6	-0.1380712	147.6	-0.1096388	147.6	-0.1093116	147.6	-0.1060868	147.6	-0.06960243
147.81	-0.05894876	147.81	-0.04495536	147.81	0.01770673	147.81	0.04817951	147.81	0.00844912	147.81	-0.02599528	147.81	-0.02057065	147.81	0.00907535	147.8	-0.1176153	147.8	-0.1494034	147.8	-0.1305901	147.8	-0.1318334	147.8	-0.1096909	147.8	-0.1106369	147.8	-0.104264	147.8	-0.07004609
148.01	-0.05894285	148.01	-0.04417008	148.01	0.02094072	148.01	0.04967241	148.01	0.01087998	148.01	-0.024848	148.01	-0.01591508	148.01	0.00973409	148	-0.1141638	148	-0.1380598	148	-0.1296864	148	-0.135437	148	-0.1143179	148	-0.1115141	148	-0.1013225	148	-0.06913146
148.21	-0.05797531	148.21	-0.04580191	148.21	0.01736782	148.21	0.04343318	148.21	0.00730839	148.21	-0.02792594	148.21	-0.01458697	148.21	0.00719882	148.2	-0.1145362	148.2	-0.1400799	148.2	-0.1310041	148.2	-0.1325248	148.2	-0.1184573	148.2	-0.1099547	148.2	-0.09953666	148.2	-0.07435239
148.41	-0.05737764	148.41	-0.0432415	148.41	0.02010211	148.41	0.04804772	148.41	0.01025246	148.41	-0.02475656	148.41	-0.02056683	148.41	0.00460318	148.4	-0.1171969	148.4	-0.1405386	148.4	-0.1287056	148.4	-0.1317885	148.4	-0.1102394	148.4	-0.1098973	148.4	-0.1027434	148.4	-0.07042317
148.61	-0.0584519	148.61	-0.0454976	148.61	0.01715824	148.61	0.05186145	148.61	0.00875072	148.61	-0.02303191	148.61	-0.01988998	148.61	0.01153957	148.6	-0.1073631	148.6	-0.139084	148.6	-0.12691	148.6	-0.1310884	148.6	-0.1138376	148.6	-0.107917	148.6	-0.09980655	148.6	-0.07083625
148.81	-0.05824936	148.81	-0.04584319	148.81	0.01550086	148.81	0.04830033	148.81	0.01144004	148.81	-0.02721623	148.81	-0.01569603	148.81	0.00707669	148.82	-0.1161042	148.82	-0.1371884	148.82	-0.1267831	148.82	-0.1301623	148.82	-0.1143659	148.82	-0.1089829	148.82	-0.09954334	148.82	-0.06823195
149.01	-0.06061175	149.01	-0.04687145	149.01	0.01851778	149.01	0.05038537	149.01	0.01220746	149.01	-0.03075813	149.01	-0.01336886	149.01	0.00639364	149	-0.1094234	149	-0.1463817	149	-0.1275236	149	-0.1286007	149	-0.1135771	149	-0.1077054	149	-0.1032301	149	-0.06958975
149.21	-0.05677117	149.21	-0.04037585	149.21	0.02083452	149.21	0.04826352	149.21	0.00917685	149.21	-0.02795947	149.21	-0.01695559	149.21	0.00669276	149.2	-0.1126972	149.2	-0.1395508	149.2	-0.1246152	149.2	-0.1325313	149.2	-0.113442	149.2	-0.1104945	149.2	-0.1062936	149.2	-0.06996356
149.41	-0.05957086	149.41	-0.04447133	149.41	0.01981904	149.41	0.05014449	149.41	0.01167115	149.41	-0.02485917	149.41	-0.01547644	149.41	0.00813688	149.4	-0.1149364	149.4	-0.1377676	149.4	-0.1302187	149.4	-0.1311328	149.4	-0.1113161	149.4	-0.1110672	149.4	-0.09938802	149.4	-0.06659314
149.61	-0.0580041	149.61	-0.04296451	149.61	0.02179212	149.61	0.04988181	149.61	0.00978856	149.61	-0.02921697	149.61	-0.017585	149.61	0.00609432	149.6	-0.1126611	149.6	-0.1387919	149.6	-0.1273024	149.6	-0.1294588	149.6	-0.1102155	149.6	-0.1127968	149.6	-0.1023885	149.6	-0.06974163
149.81	-0.05303922	149.81	-0.04440024	149.81	0.01971211	149.81	0.05305108	149.81	0.01600896	149.81	-0.0242533	149.81	-0.0137637	149.81	0.00813585	149.8	-0.1093973	149.8	-0.1392188	149.8	-0.1252975	149.8	-0.1321375	149.8	-0.113953	149.8	-0.1107369	149.8	-0.1008926	149.8	-0.06663221
150.01	-0.07833803	150.01	-0.06528433	150.01	-0.00450017	150.01	0.03139476	150.01	-0.00668903	150.01	-0.04878519	150.01	-0.03829802	150.01	0.00568734	150	-0.1113767	150	-0.1406308	150	-0.1233333	150	-0.1321421	150	-0.1089523	150	-0.1088351	150	-0.1015878	150	-0.06572833
150.21	-0.07792288	150.21	-0.06540187	150.21	-0.00691805	150.21	0.03179895	150.21	-0.01690572	150.21	-0.05050994	150.21	-0.04145438	150.21	0.01144403	150.2	-0.1103499	150.2	-0.1415009	150.2	-0.1265507	150.2	-0.1338315	150.2	-0.1115099	150.2	-0.1056082	150.2	-0.09955568	150.2	-0.06529752
150.41	-0.08436894	150.41	-0.0694176	150.41	-0.00315709	150.41	0.02092176	150.41	-0.00938577	150.41	-0.05497235	150.41	-0.04437333	150.41	0.01214203	150.4	-0.1071307	150.4	-0.1430796	150.4	-0.1229434	150.4	-0.1318383	150.4	-0.1140986	150.4	-0.1088548	150.4	-0.09724467	150.4	-0.07208559
150.61	-0.08607754	150.61	-0.06505112	150.61	0.00074562	150.61	0.02809327	150.61	-0.01181241	150.61	-0.05147435	150.61	-0.04742251	150.61	0.01288705	150.6	-0.1082288	150.6	-0.141578	150.6	-0.1253802	150.6	-0.1317979	150.6	-0.1097799	150.6	-0.1081009	150.6	-0.09924834	150.6	-0.0689791
150.81	-0.07750341	150.81	-0.06642491	150.81	-0.00051891	150.81	0.03034995	150.81	-0.00786313	150.81	-0.05039844	150.81	-0.04110937	150.81	0.00753591	150.8	-0.1101749	150.8	-0.1458258	150.8	-0.1267169	150.8	-0.1304797	150.8	-0.1100906	150.8	-0.1111068	150.8	-0.1015943	150.8	-0.07139884
151.01	-0.07311089	151.01	-0.06210851	151.01	0.00663879	151.01	0.03137558	151.01	-0.01087221	151.01	-0.04704234	151.01	-0.03904221	151.01	0.00963223	151	-0.1089338	151	-0.1408209	151	-0.1262075	151	-0.1342725	151	-0.1072184	151	-0.1071897	151	-0.09971375	151	-0.06925836
151.21	-0.07246627	151.21	-0.06071682	151.21	0.01176524	151.21	0.03657753	151.21	-0.0051474	151.21	-0.03662684	151.21	-0.02716306	151.21	0.01238339	151.2	-0.1096392	151.2	-0.1372703	151.2	-0.1249048	151.2	-0.1302106	151.2	-0.1110109	151.2	-0.1044051	151.2	-0.0967119	151.2	-0.06968799
151.41	-0.0605318	151.41	-0.05386842	151.41	0.01305247	151.41	0.04285383	151.41	-0.00143388	151.41	-0.0351894	151.41	-0.03189376	151.41	0.011699	151.4	-0.113552	151.4	-0.1415492	151.4	-0.1263704	151.4	-0.1348243	151.4	-0.1131078	151.4	-0.1064055	151.4	-0.09850808	151.4	-0.06960633
151.61	-0.05946008	151.61	-0.04574254	151.61	0.01885476	151.61	0.04768108	151.61	0.00700923	151.61	-0.03184143	151.61	-0.02659426	151.61	0.01372923	151.6	-0.1081878	151.6	-0.1405832	151.6	-0.1256247	151.6	-0.1298899	151.6	-0.1127529	151.6	-0.1077898	151.6	-0.1011068	151.6	-0.06522892
151.81	-0.05623766	151.81	-0.03852311	151.81	0.02179032	151.81	0.05534689	151.81	0.00873584	151.81	-0.02683281	151.81	-0.01916678	151.81	0.01430555	151.8	-0.1096909	151.8	-0.1367335	151.8	-0.126035	151.8	-0.1299514	151.8	-0.1098117	151.8	-0.108838	151.8	-0.09840781	151.8	-0.06744852
152.01	-0.05103695	152.01	-0.03727784	152.01	0.02767397	152.01	0.05683473	152.01	0.01586878	152.01	-0.01982329	152.01	-0.01348398	152.01	0.01001461	152	-0.1067361	152	-0.1386404	152	-0.1262925	152	-0.1334737	152	-0.1092004	152	-0.1040379	152	-0.1009157	152	-0.06912352
152.21	-0.04709784	152.21	-0.03020788	152.21	0.02858002	152.21	0.06043178	152.21	0.02232357	152.21	-0.01608215	152.21	-0.00638367	152.21	0.01433615	152.2	-0.1112835	152.2	-0.1366137	152.2	-0.1247743	152.2	-0.128113	152.2	-0.1087792	152.2	-0.1072569	152.2	-0.09863203	152.2	-0.06855999
152.41	-0.04146411	152.41	-0.02302234	152.41	0.03999828	152.41	0.07000951	152.41	0.02516131	152.41	-0.011689	152.41	-0.00244294	152.41	0.0151835	152.4	-0.1120867	152.4	-0.1406402	152.4	-0.1259362	152.4	-0.1311165	152.4	-0.110668	152.4	-0.1062443	152.4	-0.09743898	152.4	-0.06503283
152.61	-0.03736895	152.61	-0.01868975	152.61	0.04289329	152.61	0.07079783	152.61	0.03217382	152.61	-0.00599529	152.61	0.00532905	152.61	0.01252626	152.6	-0.1100618	152.6	-0.1361526	152.6	-0.1264908	152.6	-0.1284495	152.6	-0.1104802	152.6	-0.1081017	152.6	-0.09587879	152.6	-0.06836148
152.81	-0.03025077	152.81	-0.01981941	152.81	0.0489496	152.81	0.0776619	152.81	0.03585066	152.81	0.00482273	152.81	0.01449271	152.81	0.01426567	152.8	-0.1116173	152.8	-0.1413774	152.8	-0.1242666	152.8	-0.1298622	152.8	-0.1101333	152.8	-0.1047291	152.8	-0.09656025	152.8	-0.06860834
153.01	-0.02319757	153.01	-0.01294542	153.01	0.05238238	153.01	0.08592214	153.01	0.04081696	153.01	0.00664324	153.01	0.01001461	153.01	0.01745628	153	-0.1131088	153	-0.140973	153	-0.1252041	153	-0.1289589	153	-0.1078279	153	-0.1079353	153	-0.09796887	153	-0.0662389
153.21	-0.01973283	153.21	-0.00910752	153.21	0.05757742	153.21	0.0919796	153.21	0.04424651	153.21	0.01366547	153.21	0.01744063	153.21	0.01180629	153.2	-0.1080229	153.2	-0.1374776	153.2	-0.1228499	153.2	-0.1280544	153.2	-0.1098093	153.2	-0.1071492	153.2	-0.09453884	153.2	-0.06401203
153.41	-0.0127808	153.41	0.00283646	153.41	0.06477371	153.41	0.09630748	153.41	0.0527594	153.41	0.01725823	153.41	0.02252315	153.41	0.01643018	153.4	-0.1101201	153.4	-0.1408816	153.4	-0.123425	153.4	-0.1280055	153.4	-0.1088602	153.4	-0.1096668	153.4	-0.09381179	153.4	-0.0699821
153.61	-0.00862141	153.61	0.00401461	153.61	0.06996386	153.61	0.09943789	153.61	0.05958373	153.61	0.02486231	153.61	0.03329114	153.61	0.0180292	153.6	-0.1114814	153.6	-0.1392104	153.6	-0.1226688	153.6	-0.1285706	153.6	-0.106947	153.6	-0.1013748	153.6	-0.09679311	153.6	-0.06597669
153.81	-0.000085	153.81	0.01192333	153.81	0.07055219	153.81	0.1060266	153.81	0.0656132	153.81	0.03051268	153.81	0.03661092	153.81	0.01592208	153.8	-0.1064298	153.8	-0.1346048	153.8	-0.1236179	153.8	-0.1260318	153.8	-0.1042678	153.8	-0.1059844	153.8	-0.09677045	153.8	-0.06707244
154.01	0.00448553	154.01	0.01767705	154.01	0.07783539	154.01	0.1117852	154.01	0.07137346	154.01	0.03397994	154.01	0.04230287	154.01	0.01733344	154	-0.1071416	154	-0.1353239	154	-0.1250426	154	-0.1255813	154	-0.1048618	154	-0.1053166	154	-0.09603602	154	-0.06504542
154.21	0.00881941	154.21	0.02688642	154.21	0.09019177	154.21	0.1232597	154.21	0.07541627	154.21	0.0396721	154.21	0.04643082	154.21	0.01279238	154.2	-0.1104177	154.2	-0.1373014	154.2	-0.1215634	154.2	-0.1270681	154.2	-0.1083944	154.2	-0.1033445	154.2	-0.09941041	154.2	-0.07022502
154.41	0.01713321	154.41	0.02908524	154.41	0.09155823	154.41	0.1225532	154.41	0.081531	154.41	0.04593934	154.41	0.05457534	154.41	0.01627463	154.4	-0.106592	154.4	-0.1346662	154.4	-0.1211561	154.4	-0.1274011	154.4	-0.1101524	154.4	-0.1077499	154.4	-0.09423624	154.4	-0.06373467
154.61	0.01771742	154.61	0.03131389	154.61	0.09846884	154.61	0.1294709	154.61	0.08432294	154.61	0.0539223	154.61	0.0596147	154.61	0.01587802	154.6	-0.1084459	154.6	-0.135751	154.6	-0.1190389	154.6	-0.1291673	154.6	-0.106881	154.6	-0.1063617	154.6	-0.09349917	154.6	-0.06868034
154.81	0.02481349	154.81	0.03820376	154.81	0.1007991	154.81	0.1363272	154.81	0.09227766	154.81	0.055196	154.81	0.06770375	154.81	0.01831621	154.8	-0.1107801	154.8	-0.1340688	154.8	-0.1228991	154.8	-0.1248128	154.8	-0.1029461	154.8	-0.1033616	154.8	-0.09996001	154.8	-0.0649231
155.01	0.02916523	155.01	0.04786247	155.01	0.1117882	155.01	0.1425982	155.01	0.09726346	155.01	0.06429245	155.01	0.06756993	155.01	0.01781011	155	-0.1055447	155	-0.1387431	155	-0.1207584	155	-0.1287702	155	-0.102944	155	-0.1057418	155	-0.09991328	155	-0.06456
155.21	0.03637475	155.21	0.0523177	155.21	0.1125493	155.21	0.1437626	155.21	0.1047333	155.21	0.07166578	155.21	0.07639278	155.21	0.02184428	155.2	-0.1070116	155.2	-0.1348377	155.2	-0.1227027	155.2	-0.1285874	155.2	-0.1117861	155.2	-0.1051872	155.2	-0.09791441	155.2	-0.06179994
155.41	0.04140237	155.41	0.05374759	155.41	0.1175671	155.41	0.1552892	155.41	0.1058308	155.41	0.07403582	155.41	0.08249447	155.41	0.0192534	155.4	-0.1104821	155.4	-0.1357113	155.4	-0.1226702	155.4	-0.1271902	155.4	-0.109979	155.4	-0.1087676	155.4	-0.09495947	155.4	-0.0653029
155.61	0.04750532	155.61	0.06308899	155.61	0.1196445	155.61	0.1554028	155.61	0.1139581	155.61	0.07853863	155.61	0.09346595	155.61	0.01985209	155.6	-0.1109348	155.6	-0.1391012	155.6	-0.1261765	155.6	-0.1241041	155.6	-0.1055147	155.6	-0.1025758	155.6	-0.09328184	155.6	-0.06202926
155.81	0.05178298	155.81	0.06200453	155.81	0.1329186	155.81	0.1616208	155.81	0.1198803	155.81	0.08398351	155.81	0.09448962	155.81	0.01988924	155.8	-0.1093927	155.8	-0.1361229	155.8	-0.1204293	155.8	-0.1257347	155.8	-0.1080666	155.8	-0.1028466	155.8	-0.09583309	155.8	-0.06493705
156.01	0.05650056	156.01	0.06803388	156.01	0.132336	156.01	0.1681946	156.01	0.1262175	156.01	0.08974265	156.01	0.1033327	156.01	0.01786582	156	-0.1091938	156	-0.1332449	156	-0.1216163	156	-0.1288459	156	-0.1097602	156	-0.1030594	156	-0.09732608	156	-0.06368368
156.21	0.06499133	156.21	0.07909337	156.21	0.1390563	156.21	0.1766668	156.21	0.1280531	156.21	0.09603269	156.21	0.1078927	156.21	0.01548544	156.2	-0.1047201	156.2	-0.1367163	156.2	-0.1258409	156.2	-0.1268542	156.2	-0.1065596	156.2	-0.1010701	156.2	-0.09637674	156.2	-0.06235334
156.41	0.06485468	156.41	0.08242968	156.41	0.1472512	156.41	0.1781369	156.41	0.1356928	156.41	0.1023142	156.41	0.1152134	156.41	0.01669204	156.4	-0.1090279	156.4	-0.1306177	156.4	-0.1214836	156.4	-0.1268098	156.4	-0.105937	156.4	-0.107843	156.4	-0.09295886	156.4	-0.06158213
156.61	0.07023331	156.61	0.09054701	156.61	0.150231	156.61	0.1859987	156.61	0.1411079	156.61	0.1086169	156.61	0.1162101	156.61	0.01778998	156.6	-0.1119569	156.6	-0.1344602	156.6	-0.1217378	156.6	-0.1268014	156.6	-0.1058945	156.6	-0.107281	156.6	-0.09585158	156.6	-0.06471339
156.81	0.07998535	156.81	0.09171498	156.81	0.1523465	156.81	0.1931192	156.81	0.1524924	156.81	0.1116329	156.81	0.1230778	156.81	0.01895628	156.8	-0.1088002	156.8	-0.1354715	156.8	-0.1200187	156.8	-0.1261066	156.8	-0.1059016	156.8	-0.1052555	156.8	-0.09151343	156.8	-0.06317048
157.01	0.08787934	157.01	0.1007725	157.01	0.1628623	157.01	0.1964078	157.01	0.1491655	157.01	0.1179265	157.01	0.1298805	157.01	0.0190215	157	-0.1063645	157	-0.1379811	157	-0.1223941	157	-0.1270629	157	-0.1040872	157	-0.1061267	157	-0.09534444	157	-0.06215076
157.21	0.09016942	157.21	0.1067728	157.21	0.1656062	157.21	0.2008281	157.21	0.1563325	157.21	0.1263079	157.21	0.1405103	157.21	0.02029253	157.2	-0.1064902	157.2	-0.1340939	157.2	-0.1225232	157.2	-0.1285933	157.2	-0.103219	157.2	-0.104327	157.2	-0.09722652	157.2	-0.0645892
157.41	0.09592386	157.41	0.1141013	157.41	0.1675059	157.41	0.2076175	157.41	0.165471	157.41	0.1277845	157.41	0.1353041	157.41	0.02469873	157.4	-0.108429	157.4	-0.1394189	157.4	-0.1176503	157.4	-0.1253515	157.4	-0.1061373	157.4	-0.1027541	157.4	-0.09547097	157.4	-0.06170067
157.61	0.09960358	157.61	0.1189237	157.61	0.176631	157.61	0.2125916	157.61	0.1702684	157.61	0.1316343	157.61	0.1446974	157.61	0.0204421	157.6	-0.1097512	157.6	-0.1367053	157.6	-0.1213273	157.6	-0.1258773	157.6	-0.1074521	157.6	-0.1051669	157.6	-0.09199476	157.6	-0.06463698
157.81	0.1069737	157.81	0.1284264	157.81	0.1878183	157.81	0.2179305	157.81	0.1730604	157.81	0.1398034	157.81	0.1529245	157.81	0.01734841	157.8	-0.1075412	157.8	-0.1360578	157.8	-0.1200781	157.8	-0.1262446	157.8	-0.106651	157.8	-0.1026678	157.8	-0.09126009	157.8	-0.06468511
158.01	0.1136376	158.01	0.1282585	158.01	0.1873411	158.01	0.2244144	158.01	0.1794274	158.01	0.1384065	158.01	0.1574866	158.01	0.01673251	158	-0.1089463	158	-0.1364365	158	-0.1217014	158	-0.1204881	158	-0.1072231	158	-0.1055123	158	-0.09044164	158	-0.06218798
158.21	0.1153335	158.21	0.1324707	158.21	0.1892987	158.21	0.2260344	158.21	0.1877816	158.21	0.1498458	158.21	0.1615425	158.21	0.01803404	158.2	-0.1051363	158.2	-0.135411	158.2	-0.1262982	158.2	-0.12795	158.2	-0.1060081	158.2	-0.1001374	158.2	-0.09090002	158.2	-0.05965265
158.41	0.1250474	158.41	0.1386956	158.41	0.1985636	158.41	0.2364743	158.41	0.1864421	158.41	0.1555577	158.41	0.1645694	158.41	0.02526989	158.4	-0.1073833	158.4	-0.1365006	158.4	-0.1233316	158.4	-0.1245572	158.4	-0.1076395	158.4	-0.1037814	158.4	-0.0965801	158.4	-0.06275109
158.61	0.1289507	158.61	0.1503358	158.61	0.2038282	158.61	0.2436317	158.61	0.1975298	158.61	0.1600005	158.61	0.1707361	158.61	0.01954011	158.6	-0.1072375	158.6	-0.1367668	158.6	-0.1210684	158.6	-0.1273311	158.6	-0.09905396	158.6	-0.1034705	158.6	-0.09703315	158.6	-0.06344481
158.81	0.1335452	158.81	0.1474412	158.81	0.2093284	158.81	0.2484341	158.81	0.2010113	158.81	0.1694065	158.81	0.1787924	158.81	0.02219019	158.8	-0.1026676	158.8	-0.1354548	158.8	-0.1165455	158.8	-0.1266009	158.8	-0.1042413	158.8	-0.09822678	158.8	-0.1002439	158.8	-0.05998792
159.01	0.1391435	159.01	0.1557128	159.01	0.2175886	159.01	0.2509916	159.01	0.2069	159.01	0.1749942	159.01	0.1819358	159.01	0.02255243	159	-0.1052238	159	-0.1350695	159	-0.1190986	159	-0.1205941	159	-0.1021888	159	-0.1016217	159	-0.09283923	159	-0.06566299
159.21	0.1441622	159.21	0.1590451	159.21	0.2165133	159.21	0.2607283	159.21	0.2146495	159.21	0.1800781	159.21	0.1895969	159.21	0.02001394	159.2	-0.1067824	159.2	-0.1345833	159.2	-0.1216895	159.2	-0.1262476	159.2	-0.1016438	159.2	-0.106051	159.2	-0.09136355	159.2	-0.0651578
159.41	0.1474847	159.41	0.1680828	159.41	0.2232074	159.41	0.2664411	159.41	0.2209788	159.41	0.1853223	159.41	0.1965049	159.41	0.02065928	159.4	-0.1040617	159.4	-0.1331502	159.4	-0.1171316	159.4	-0.1252496	159.4	-0.1032672	159.4	-0.1012529	159.4	-0.09075418	159.4	-0.06363145
159.61	0.1527644	159.61	0.1701495	159.61	0.2267561	159.61	0.2710485	159.61	0.2224149	159.61	0.1888336	159.61	0.199261	159.61	0.01899926	159.6	-0.107783	159.6	-0.1335488	159.6	-0.117058	159.6	-0.1200206	159.6	-0.103534	159.6	-0.101715	159.6	-0.08809474	159.6	-0.06529487
159.81	0.1602629	159.81	0.1737813	159.81	0.2339938	159.81	0.2711749	159.81	0.2266983	159.81	0.1933367	159.81	0.2053627	159.81	0.02096213	159.8	-0.1061457	159.8	-0.1383499	159.8	-0.1212296	159.8	-0.125843	159.8	-0.1069882	159.8	-0.1021225	159.8	-0.09573434	159.8	-0.0609283
160.01	0.1625722	160.01	0.1782994	160.01	0.2398829	160.01	0.2849057	160.01	0.229646	160.01	0.1953193	160.01	0.2110072	160.01	0.01890432	160	-0.1054602	160	-0.1336002	160	-0.1186198	160	-0.1232218	160	-0.1058728	160	-0.09951102	160	-0.0956026	160	-0.06199335
160.21	0.1670254	160.21	0.1878811	160.21	0.2470138	160.21	0.2832893	160.21	0.2390862	160.21	0.2026478	160.21	0.2164578	160.21	0.02188708	160.2	-0.1050971	160.2	-0.1358079	160.2	-0.1182922	160.2	-0.125648	160.2	-0.1032003	160.2	-0.1042925	160.2	-0.09439699	160.2	-0.06097551
160.41	0.173907	160.41	0.1933354	160.41	0.2517439	160.41	0.2880606	160.41	0.2416855	160.41	0.2136454	160.41	0.219583	160.41	0.01981369	160.4	-0.1028808	160.4	-0.1307189	160.4	-0.1161913	160.4	-0.1274188	160.4	-0.102606	160.4	-0.1072542	160.4	-0.08586367	160.4	-0.06396028
160.61	0.1819596	160.61	0.1970897	160.61	0.2539678	160.61	0.2940904	160.61	0.2454445	160.61	0.2179629	160.61	0.2261097	160.61	0.02556708	160.6	-0.1011794	160.6	-0.134658	160.6	-0.1223382	160.6	-0.1275987	160.6	-0.1029796	160.6	-0.1050713	160.6	-0.09141134	160.6	-0.06529083
160.81	0.1898684	160.81	0.1996811	160.81	0.2607225	160.81	0.2989184	160.81	0.2552761	160.81	0.2227427	160.81	0.2323611	160.81	0.0234116	160.8	-0.1032599	160.8	-0.1345614	160.8	-0.1211564	160.8	-0.1262309	160.8	-0.101587	160.8	-0.09984045	160.8	-0.09646277	160.8	-0.06659656
161.01	0.1941967	161.01	0.2015882	161.01	0.2639821	161.01	0.3046937	161.01	0.2612729	161.01	0.2275702	161.01	0.2372904	161.01	0.02142866	161	-0.1054025	161	-0.1324575	161	-0.1209956	161	-0.1234727	161	-0.1025506	161	-0.1003958	161	-0.0979964	161	-0.05675947
161.21	0.1914778	161.21	0.2132235	161.21	0.267781	161.21	0.3092438	161.21	0.2649593	161.21	0.2301592	161.21	0.2455526	161.21	0.02352421	161.2	-0.1103218	161.2	-0.1362871	161.2	-0.1210047	161.2	-0.1193314	161.2	-0.1061118	161.2	-0.1060071	161.2	-0.08694199	161.2	-0.06452983
161.41	0.2003329	161.41	0.2194446	161.41	0.2791137	161.41	0.3163362	161.41	0.2688279	161.41	0.2364332	161.41	0.2484742	161.41	0.02678474	161.4	-0.1015751	161.4	-0.1374409	161.4	-0.1188277	161.4	-0.126379	161.4	-0.1047551	161.4	-0.09465989	161.4	-0.09199049	161.4	-0.06295285
161.61	0.206143	161.61	0.2223365	161.61	0.2844034	161.61	0.3199	161.61	0.2756686	161.61	0.2415603	161.61	0.2578462	161.61	0.02035538	161.6	-0.102818	161.6	-0.1353095	161.6	-0.1148937	161.6	-0.1207911	161.6	-0.1039486	161.6	-0.1006907	161.6	-0.0933394	161.6	-0.05895733
161.81	0.215346	161.81	0.230142	161.81	0.2870481	161.81	0.3340861	161.81	0.2806	161.81	0.2471453	161.81	0.26612	161.81	0.0249472	161.8	-0.1053244	161.8	-0.1340849	161.8	-0.1229994	161.8	-0.1185119	161.8	-0.1022257	161.8	-0.1023368	161.8	-0.09455972	161.8	-0.06192303
162.01	0.2136282	162.01	0.2357039	162.01	0.2902157	162.01	0.3324609	162.01	0.2858467	162.01	0.2514346	162.01	0.2662131	162.01	0.02238986	162	-0.1003882	162	-0.1297292	162	-0.1159636	162	-0.1214778	162	-0.09962784	162	-0.1008928	162	-0.08966959	162	-0.060912
162.21	0.2213791	162.21	0.2427655	162.21	0.2963803	162.21	0.340393	162.21	0.2930793	162.21	0.2551026	162.21	0.2704716	162.21	0.02522824	162.2	-0.104158	162.2	-0.1327984	162.2	-0.1190087	162.2	-0.1260913	162.2	-0.1049843	162.2	-0.1013437	162.2	-0.09113332	162.2	-0.06448124
162.41	0.2267209	162.41	0.2434521	162.41	0.3039258	162.41	0.3410805	162.41	0.2962022	162.41	0.261435	162.41	0.2793096	162.41	0.02604261	162.4	-0.09987368	162.4	-0.1313028	162.4	-0.1182244	162.4	-0.1222225	162.4	-0.1037604	162.4	-0.09833115	162.4	-0.09169043	162.4	-0.05563596
162.61	0.2370948	162.61	0.2467709	162.61	0.3061624	162.61	0.3502772	162.61	0.2980152	162.61	0.263484	162.61	0.2807441	162.61	0.02732949	162.6	-0.1017883	162.6	-0.1330176	162.6	-0.1154584	162.6	-0.1248771	162.6	-0.1004337	162.6	-0.1004172	162.6	-0.09448772	162.6	-0.05820854
162.81	0.238	162.81	0.2517481	162.81	0.3127036	162.81	0.3576151	162.81	0.3119712	162.81	0.2722089	162.81	0.2841735	162.81	0.02651961	162.8	-0.1007845	162.8	-0.132956	162.8	-0.1209857	162.8	-0.1199859	162.8	-0.1042657	162.8	-0.1041547	162.8	-0.08686853	162.8	-0.06154899
163.01	0.2452964	163.01	0.2587778	163.01	0.3148414	163.01	0.3617324	163.01	0.3124166	163.01	0.2821105	163.01	0.2916265	163.01	0.02628241	163	-0.1058764	163	-0.1336747	163	-0.1139416	163	-0.1216269	163	-0.1039054	163	-0.1010978	163	-0.08948112	163	-0.05981769
163.21	0.2461891	163.21	0.2662955	163.21	0.3247224	163.21	0.3647656	163.21	0.3173937	163.21	0.280758	163.21	0.2910117	163.21	0.02130414	163.2	-0.102861	163.2	-0.130201	163.2	-0.1207721	163.2	-0.1200479	163.2	-0.1014834	163.2	-0.09885656	163.2	-0.09128692	163.2	-0.06151988
163.41	0.251798	163.41	0.2677971	163.41	0.3247975	163.41	0.3651642	163.41	0.318524	163.41	0.2896152	163.41	0.30062	163.41	0.0274954	163.4	-0.1016624	163.4	-0.1312087	163.4	-0.1172863	163.4	-0.1256398	163.4	-0.09935451	163.4	-0.1007634	163.4	-0.08851662	163.4	-0.05630322
163.61	0.2561148	163.61	0.2696651	163.61	0.3286221	163.61	0.3702229	163.61	0.3258619	163.61	0.2935674	163.61	0.306145	163.61	0.02516697	163.6	-0.1031393	163.6	-0.1307587	163.6	-0.1192461	163.6	-0.1262685	163.6	-0.1002783	163.6	-0.09900185	163.6	-0.09135523	163.6	-0.05608285
163.81	0.269022	163.81	0.2747405	163.81	0.3341006	163.81	0.3819443	163.81	0.3338768	163.81	0.2990427	163.81	0.3140132	163.81	0.02662417	163.8	-0.1025692	163.8	-0.1272577	163.8	-0.1155561	163.8	-0.1216318	163.8	-0.09804872	163.8	-0.1004934	163.8	-0.08877556	163.8	-0.05961755
164.01	0.2645396	164.01	0.2836572	164.01	0.3413401	164.01	0.3856255	164.01	0.3352989	164.01	0.3081654	164.01	0.3165388	164.01	0.02885176	164	-0.1036933	164	-0.1311414	164	-0.1222873	164	-0.1225153	164	-0.09770687	164	-0.09631738	164	-0.08474385	164	-0.05487493
164.21	0.273515	164.21	0.2913325	164.21	0.3445456	164.21	0.3916403	164.21	0.342061	164.21	0.3114721	164.21	0.3230859	164.21	0.02689435	164.2	-0.1032267	164.2	-0.1286021	164.2	-0.1157449	164.2	-0.1192352	164.2	-0.09918281	164.2	-0.09956923	164.2	-0.08946002	164.2	-0.06215791
164.41	0.2766108	164.41	0.2943501	164.41	0.3491183	164.41	0.3959971	164.41	0.3442256	164.41	0.3150274	164.41	0.325949	164.41	0.0239154	164.4	-0.09992239	164.4	-0.1308866	164.4	-0.1136615	164.4	-0.12413	164.4	-0.09840879	164.4	-0.1003594	164.4	-0.09407326	164.4	-0.0583641
164.61	0.2759537	164.61	0.2996126	164.61	0.3578138	164.61	0.3986639	164.61	0.3528681	164.61	0.3202904	164.61	0.3327067	164.61	0.02319489	164.6	-0.1052496	164.6	-0.1292608	164.6	-0.1156824	164.6	-0.1234471	164.6	-0.1033213	164.6	-0.1044535	164.6	-0.08969234	164.6	-0.06237553
164.81	0.2866055	164.81	0.3041818	164.81	0.3588621	164.81	0.4043016	164.81	0.3569314	164.81	0.327724	164.81	0.3376786	164.81	0.02847271	164.8	-0.1044044	164.8	-0.1340743	164.8	-0.1197076	164.8	-0.1243371	164.8	-0.09948087	164.8	-0.09641966	164.8	-0.08676081	164.8	-0.0574684
165.01	0.2887341	165.01	0.3061872	165.01	0.3634218	165.01	0.4101971	165.01	0.3645911	165.01	0.3292883	165.01	0.3432746	165.01	0.03041494	165	-0.1039218	165	-0.1317843	165	-0.1162966	165	-0.1215173	165	-0.09901368	165	-0.09689427	165	-0.09029745	165	-0.05766515
165.21	0.2964718	165.21	0.317137	165.21	0.3710238	165.21	0.4134329	165.21	0.3656267	165.21	0.3294133	165.21	0.3484788	165.21	0.02750815	165.2	-0.09766091	165.2	-0.1338297	165.2	-0.1160438	165.2	-0.124802	165.2	-0.09784978	165.2	-0.09454121	165.2	-0.09280736	165.2	-0.05923342
165.41	0.2996046	165.41	0.319638	165.41	0.3715998	165.41	0.4236182	165.41	0.3692173	165.41	0.33908	165.41	0.3526112	165.41	0.02920855	165.4	-0.1038713	165.4	-0.1338814	165.4	-0.1134621	165.4	-0.1219551	165.4	-0.106255	165.4	-0.100327	165.4	-0.08779106	165.4	-0.06193656
165.61	0.3040707	165.61	0.3253148	165.61	0.3809164	165.61	0.4265748	165.61	0.3698531	165.61	0.3441137	165.61	0.3647302	165.61	0.02789023	165.6	-0.1017423	165.6	-0.133406	165.6	-0.1147842	165.6	-0.1222204	165.6	-0.09766116	165.6	-0.09811929	165.6	-0.09140259	165.6	-0.05644605
165.81	0.3062273	165.81	0.3249411	165.81	0.384922	165.81	0.4249626	165.81	0.3785169	165.81	0.3490775	165.81	0.3624541	165.81	0.02738341	165.8	-0.09814193	165.8	-0.1289769	165.8	-0.1176421	165.8	-0.1220419	165.8	-0.09937367	165.8	-0.09953441	165.8	-0.08817165	165.8	-0.06045575
166.01	0.319144	166.01	0.3353842	166.01	0.3874249	166.01	0.4378493	166.01	0.38202	166.01	0.3544813	166.01	0.3666085	166.01	0.03023187	166	-0.09758295	166	-0.1289586	166	-0.1195153	166	-0.1211697	166	-0.1015065	166	-0.09653936	166	-0.08838004	166	-0.06160445
166.21	0.3212541	166.21	0.3400683	166.21	0.3890864	166.21	0.4401351	166.21	0.3914618	166.21	0.3560265	166.21	0.3736914	166.21	0.02423574	166.2	-0.1012113	166.2	-0.1300382	166.2	-0.1154476	166.2	-0.1202154	166.2	-0.09896467	166.2	-0.09727763	166.2	-0.09103898	166.2	-0.05555674
166.41	0.3190318	166.41	0.3385065	166.41	0.3994035	166.41	0.4437268	166.41	0.3946344	166.41	0.3621694	166.41	0.3833804	166.41	0.02507299	166.4	-0.09657788	166.4	-0.1315161	166.4	-0.1199719	166.4	-0.1217268	166.4	-0.09539916	166.4	-0.09799136	166.4	-0.08904119	166.4	-0.0577984
166.61	0.3297801	166.61	0.3466664	166.61	0.4021802	166.61	0.4495015	166.61	0.4039875	166.61	0.365725	166.61	0.3839237	166.61	0.0297257	166.6	-0.09998217	166.6	-0.1281652	166.6	-0.1130908	166.6	-0.1199559	166.6	-0.0969479	166.6	-0.09440055	166.6	-0.09336323	166.6	-0.05829464
166.81	0.3341857	166.81	0.3546734	166.81	0.4068673	166.81	0.4604041	166.81	0.4004037	166.81	0.3702932	166.81	0.3904097	166.81	0.02874949	166.8	-0.1040617	166.8	-0.1265864	166.8	-0.1100059	166.8	-0.1197844	166.8	-0.1001081	166.8	-0.09436374	166.8	-0.08803221	166.8	-0.06116369
167.01	0.3372154	167.01	0.3547046	167.01	0.4128015	167.01	0.4610449	167.01	0.4061451	167.01	0.377669	167.01	0.3968859	167.01	0.02828745	167	-0.1007614	167	-0.1333271	167	-0.1175176	167	-0.1213571	167	-0.09707896	167	-0.0945048	167	-0.08875246	167	-0.05905493
167.21	0.3395503	167.21	0.3641216	167.21	0.4147647	167.21	0.4622187	167.21	0.411036	167.21	0.3812642	167.21	0.3976912	167.21	0.0285905	167.2	-0.1001562	167.2	-0.13003	167.2	-0.115685	167.2	-0.1238848	167.2	-0.1039134	167.2	-0.09382313	167.2	-0.08787257	167.2	-0.05943443
167.41	0.3463188	167.41	0.367783	167.41	0.419773	167.41	0.46917	167.41	0.4176741	167.41	0.3846444	167.41	0.4045478	167.41	0.02923675	167.4	-0.09821417	167.4	-0.1276541	167.4	-0.1107345	167.4	-0.1211615	167.4	-0.09529021	167.4	-0.09798445	167.4	-0.09292935	167.4	-0.05587158
167.61	0.3518234	167.61	0.3734478	167.61	0.4274374	167.61	0.4670811	167.61	0.4222714	167.61	0.3906009	167.61	0.4079325	167.61	0.03102244	167.6	-0.09855171	167.6	-0.1335065	167.6	-0.1180844	167.6	-0.120116	167.6	-0.09556204	167.6	-0.09726131	167.6	-0.09004655	167.6	-0.05681401
167.81	0.3571225	167.81	0.3749444	167.81	0.428756	167.81	0.4826301	167.81	0.4272419	167.81	0.3948228	167.81	0.4115603	167.81	0.03028342	167.8	-0.1001472	167.8	-0.1286923	167.8	-0.1175611	167.8	-0.1209419	167.8	-0.09987897	167.8	-0.09332986	167.8	-0.08625811	167.8	-0.05910621
168.01	0.3591767	168.01	0.3822423	168.01	0.435602	168.01	0.4821827	168.01	0.4304516	168.01	0.4036264	168.01	0.4169759	168.01	0.02993932	168	-0.1023545	168	-0.1277273	168	-0.11592	168	-0.1221396	168	-0.09955741	168	-0.09575736	168	-0.08727402	168	-0.05866742
168.21	0.3633341	168.21	0.38006	168.21	0.4381308	168.21	0.4871714	168.21	0.4334598	168.21	0.402732	168.21	0.4223306	168.21	0.02935009	168.2	-0.1006138	168.2	-0.1333334	168.2	-0.1140766	168.2	-0.122572	168.2	-0.1016309	168.2	-0.09643015	168.2	-0.09113892	168.2	-0.05752472
168.41	0.3691089	168.41	0.3904014	168.41	0.4449871	168.41	0.4918936	168.41	0.445582	168.41	0.4078377	168.41	0.4238832	168.41	0.02660996	168.4	-0.1010405	168.4	-0.1305192	168.4	-0.1125828	168.4	-0.1186692	168.4	-0.1031395	168.4	-0.09588543	168.4	-0.08887472	168.4	-0.05723389
168.61	0.3725035	168.61	0.3903433	168.61	0.4473742	168.61	0.4920548	168.61	0.444376	168.61	0.4215984	168.61	0.4281474	168.61	0.02789313	168.6	-0.1019656	168.6	-0.1249883	168.6	-0.1172846	168.6	-0.1232289	168.6	-0.0993817	168.6	-0.0960191	168.6	-0.08918987	168.6	-0.0594149
168.81	0.3766624	168.81	0.3978963	168.81	0.4490515	168.81	0.5027015	168.81	0.4530409	168.81	0.4182701	168.81	0.4329732	168.81	0.02988547	168.8	-0.09708011	168.8	-0.124062	168.8	-0.1161491	168.8	-0.1171752	168.8	-0.09495993	168.8	-0.09949426	168.8	-0.09097069	168.8	-0.05767312
169.01	0.382357	169.01	0.4013593	169.01	0.4563543	169.01	0.5083665	169.01	0.4519857	169.01	0.4264522	169.01	0.4415492	169.01	0.03035988	169	-0.1004439	169	-0.1298059	169	-0.1175121	169	-0.119976	169	-0.09517563	169	-0.09733198	169	-0.09026605	169	-0.05206756
169.21	0.3878133	169.21	0.409982	169.21	0.4599213	169.21	0.5098572	169.21	0.456509	169.21	0.428766	169.21	0.4422021	169.21	0.029102	169.2	-0.1052857	169.2	-0.1283304	169.2	-0.1141288	169.2	-0.1208271	169.2	-0.09773613	169.2	-0.09669007	169.2	-0.09042441	169.2	-0.06011616
169.41	0.3918532	169.41	0.4088646	169.41	0.4667705	169.41	0.5124916	169.41	0.4581836	169.41	0.4339207	169.41	0.4463676	169.41	0.03001416	169.4	-0.09818426	169.4	-0.1251995	169.4	-0.1144907	169.4	-0.1172138	169.4	-0.09897354	169.4	-0.09595574	169.4	-0.08858638	169.4	-0.06024497
169.61	0.3933199	169.61	0.4149751	169.61	0.4701967	169.61	0.5206867	169.61	0.4675379	169.61	0.4349094	169.61	0.4563762	169.61	0.03455421	169.6	-0.09639803	169.6	-0.1308627	169.6	-0.1109264	169.6	-0.1182651	169.6	-0.09392966	169.6	-0.09928071	169.6	-0.08991119	169.6	-0.05711729
169.81	0.3990987	169.81	0.4202851	169.81	0.4786427	169.81	0.5223784	169.81	0.4710427	169.81	0.4369825	169.81	0.4642905	169.81	0.0313989	169.8	-0.09421787	169.8	-0.1294114	169.8	-0.1153687	169.8	-0.1163741	169.8	-0.09764145	169.8	-0.09645898	169.8	-0.08798769	169.8	-0.06089558
170.01	0.4011814	170.01	0.4262928	170.01	0.4757442	170.01	0.5245639	170.01	0.4766967	170.01	0.444389	170.01	0.4658051	170.01	0.03303113	170	-0.09692518	170	-0.122523	170	-0.1126533	170	-0.1199401	170	-0.09470531	170	-0.09557826	170	-0.0867236	170	-0.05813634
170.21	0.4082956	170.21	0.4314602	170.21	0.4806233	170.21	0.5276021	170.21	0.4827149	170.21	0.4521233	170.21	0.4687671	170.21	0.0303087	170.2	-0.09708191	170.2	-0.1281454	170.2	-0.112845	170.2	-0.1197579	170.2	-0.09543192	170.2	-0.09533471	170.2	-0.08597787	170.2	-0.05274962
170.41	0.4118662	170.41	0.4357001	170.41	0.4877928	170.41	0.536467	170.41	0.486673	170.41	0.4530393	170.41	0.4729523	170.41	0.02799566	170.4	-0.09930486	170.4	-0.1271656	170.4	-0.1074025	170.4	-0.1186069	170.4	-0.09537586	170.4	-0.09867141	170.4	-0.08674169	170.4	-0.05688189
170.61	0.4196029	170.61	0.4426418	170.61	0.4925023	170.61	0.5407127	170.61	0.4939443	170.61	0.4589179	170.61	0.4769055	170.61	0.03404674	170.6	-0.09405549	170.6	-0.1280013	170.6	-0.1110918	170.6	-0.1181628	170.6	-0.09518104	170.6	-0.09446002	170.6	-0.08318958	170.6	-0.05822556
170.81	0.4163337	170.81	0.4417021	170.81	0.4936202	170.81	0.5439997	170.81	0.4922749	170.81	0.4636977	170.81	0.478743	170.81	0.03184833	170.8	-0.1009333	170.8	-0.1291851	170.8	-0.1149669	170.8	-0.1168992	170.8	-0.09353416	170.8	-0.09631878	170.8	-0.08643351	170.8	-0.05505394
171.01	0.4289109	171.01	0.4471316	171.01	0.4977743	171.01	0.5472717	171.01	0.4974495	171.01	0.4691955	171.01	0.4904118	171.01	0.02951347	171	-0.09709764	171	-0.1251765	171	-0.1129719	171	-0.1204824	171	-0.09350848	171	-0.09792287	171	-0.08423665	171	-0.05838617
171.21	0.427674	171.21	0.4524342	171.21	0.50236	171.21	0.5538464	171.21	0.5007776	171.21	0.4698236	171.21	0.4875046	171.21	0.03207739	171.2	-0.09680557	171.2	-0.1267174	171.2	-0.113028	171.2	-0.1196065	171.2	-0.09629777	171.2	-0.09817699	171.2	-0.08620732	171.2	-0.0574798
171.41	0.4365862	171.41	0.4544493	171.41	0.5063661	171.41	0.5583457	171.41	0.5014235	171.41	0.4778687	171.41	0.4913214	171.41	0.03157929	171.4	-0.09661982	171.4	-0.1307099	171.4	-0.1151499	171.4	-0.1169143	171.4	-0.09610389	171.4	-0.09694913	171.4	-0.08604279	171.4	-0.05893642
171.61	0.4380113	171.61	0.4643841	171.61	0.5109201	171.61	0.5615245	171.61	0.5073201	171.61	0.4836049	171.61	0.4990325	171.61	0.03308223	171.6	-0.09897904	171.6	-0.1262739	171.6	-0.1146784	171.6	-0.1202331	171.6	-0.09787843	171.6	-0.09344217	171.6	-0.08371969	171.6	-0.05400406
171.81	0.4428334	171.81	0.4697069	171.81	0.5174351	171.81	0.5657995	171.81	0.5158949	171.81	0.4833734	171.81	0.5026174	171.81	0.03688242	171.8	-0.09814873	171.8	-0.1267937	171.8	-0.1125291	171.8	-0.1152148	171.8	-0.09261402	171.8	-0.09231569	171.8	-0.08775991	171.8	-0.05744567
172.01	0.4439882	172.01	0.4680874	172.01	0.5213114	172.01	0.5698053	172.01	0.5166734	172.01	0.4862565	172.01	0.5050766	172.01	0.03511472	172	-0.09721061	172	-0.1262308	172	-0.1139764	172	-0.1139616	172	-0.09345067	172	-0.09362748	172	-0.08594229	172	-0.05569483
172.21	0.4537588	172.21	0.4729817	172.21	0.5294574	172.21	0.5778091	172.21	0.5260419	172.21	0.493507	172.21	0.5136977	172.21	0.03138536	172.2	-0.09891208	172.2	-0.1254967	172.2	-0.1105019	172.2	-0.1180175	172.2	-0.09206209	172.2	-0.09502212	172.2	-0.08599451	172.2	-0.0569287
172.41	0.4558978	172.41	0.4768298	172.41	0.5281106	172.41	0.5795256	172.41	0.5284919	172.41	0.4941746	172.41	0.5129848	172.41	0.03803863	172.4	-0.09719002	172.4	-0.1275065	172.4	-0.113948	172.4	-0.1152454	172.4	-0.09388478	172.4	-0.09726863	172.4	-0.08566931	172.4	-0.05589769
172.61	0.4591985	172.61	0.4816771	172.61	0.5308195	172.61	0.5812482	172.61	0.5273243	172.61	0.4988245	172.61	0.5175169	172.61	0.0311804	172.6	-0.0966801	172.6	-0.124117	172.6	-0.1116358	172.6	-0.1143733	172.6	-0.09314273	172.6	-0.09613575	172.6	-0.08906244	172.6	-0.05563795
172.81	0.4609836	172.81	0.4844007	172.81	0.5388874	172.81	0.5855283	172.81	0.5324647	172.81	0.5014383	172.81	0.5225958	172.81	0.03129117	172.8	-0.09539695	172.8	-0.1276197	172.8	-0.1152035	172.8	-0.1164688	172.8	-0.09594903	172.8	-0.0948469	172.8	-0.0826579	172.8	-0.05491659
173.01	0.4660396	173.01	0.4913117	173.01	0.5399837	173.01	0.5933151	173.01	0.541566	173.01	0.5116085	173.01	0.5282795	173.01	0.02900768	173	-0.09047835	173	-0.1246748	173	-0.1136956	173	-0.1221053	173	-0.09331965	173	-0.09339746	173	-0.08710761	173	-0.05769551
173.21	0.4687068	173.21	0.4955438	173.21	0.540014	173.21	0.5946943	173.21	0.5419798	173.21	0.5111434	173.21	0.5344172	173.21	0.03470281	173.2	-0.09638814	173.2	-0.1246895	173.2	-0.1113547	173.2	-0.118963	173.2	-0.09427579	173.2	-0.09063455	173.2	-0.08588513	173.2	-0.05578104
173.41	0.4736145	173.41	0.4978814	173.41	0.549984	173.41	0.5992844	173.41	0.5477287	173.41	0.5182362	173.41	0.5384169	173.41	0.03650302	173.4	-0.09587662	173.4	-0.1236295	173.4	-0.1066782	173.4	-0.1168799	173.4	-0.09159011	173.4	-0.09257943	173.4	-0.08539639	173.4	-0.05615433
173.61	0.4747251	173.61	0.5036761	173.61	0.5495659	173.61	0.6020592	173.61	0.5514804	173.61	0.5195403	173.61	0.5417098	173.61	0.03543514	173.6	-0.09685459	173.6	-0.1277504	173.6	-0.1084321	173.6	-0.1182605	173.6	-0.09642554	173.6	-0.09297408	173.6	-0.08478829	173.6	-0.04832488
173.81	0.4820424	173.81	0.5070632	173.81	0.5559698	173.81	0.6096876	173.81	0.553395	173.81	0.5240255	173.81	0.5484424	173.81	0.03360768	173.8	-0.09421277	173.8	-0.1289453	173.8	-0.1138762	173.8	-0.1197421	173.8	-0.0925088	173.8	-0.09154398	173.8	-0.08372176	173.8	-0.0601895
174.01	0.4854402	174.01	0.5065632	174.01	0.5562558	174.01	0.6133486	174.01	0.5603632	174.01	0.5253945	174.01	0.5465942	174.01	0.03494639	174	-0.09698881	174	-0.1251434	174	-0.1134866	174	-0.11644	174	-0.09288556	174	-0.09223144	174	-0.08495246	174	-0.05764056
174.21	0.489058	174.21	0.5159153	174.21	0.5625905	174.21	0.6126271	174.21	0.5622089	174.21	0.5308516	174.21	0.5540379	174.21	0.03181227	174.2	-0.09537426	174.2	-0.1267728	174.2	-0.1136238	174.2	-0.117596	174.2	-0.09339073	174.2	-0.09604841	174.2	-0.08596565	174.2	-0.05757633
174.41	0.4953186	174.41	0.519218	174.41	0.5694689	174.41	0.6170936	174.41	0.5633731	174.41	0.5346411	174.41	0.5586881	174.41	0.03376713	174.4	-0.09668158	174.4	-0.1246675	174.4	-0.1106966	174.4	-0.1122529	174.4	-0.09257139	174.4	-0.09058439	174.4	-0.08856526	174.4	-0.05324021
174.61	0.4978842	174.61	0.5225965	174.61	0.5720011	174.61	0.6247596	174.61	0.5727878	174.61	0.5410603	174.61	0.5605968	174.61	0.03854165	174.6	-0.09877212	174.6	-0.1250761	174.6	-0.110887	174.6	-0.1150432	174.6	-0.09590343	174.6	-0.09123466	174.6	-0.08447875	174.6	-0.05540818
174.81	0.4987624	174.81	0.525695	174.81	0.5741413	174.81	0.6304069	174.81	0.5752684	174.81	0.5451223	174.81	0.5654799	174.81	0.03692432	174.8	-0.09610189	174.8	-0.1230147	174.8	-0.1098138	174.8	-0.1168529	174.8	-0.0909925	174.8	-0.09405656	174.8	-0.08133056	174.8	-0.05755341
175.01	0.5015233	175.01	0.5288019	175.01	0.5785048	175.01	0.6308367	175.01	0.5783753	175.01	0.5496026	175.01	0.5652233	175.01	0.04049299	175	-0.1000501	175	-0.1236189	175	-0.1096486	175	-0.1128901	175	-0.09321507	175	-0.09349505	175	-0.08718159	175	-0.05881078
175.21	0.5033531	175.21	0.5322853	175.21	0.5881438	175.21	0.6365257	175.21	0.5828965	175.21	0.5493405	175.21	0.5737094	175.21	0.03362289	175.2	-0.1037228	175.2	-0.1204118	175.2	-0.110143	175.2	-0.1200886	175.2	-0.09711464	175.2	-0.091993	175.2	-0.0838429	175.2	-0.05705037
175.41	0.5136918	175.41	0.5368571	175.41	0.586194	175.41	0.6401722	175.41	0.5874834	175.41	0.5494766	175.41	0.5774133	175.41	0.03653965	175.4	-0.09884381	175.4	-0.1241523	175.4	-0.1121055	175.4	-0.1172928	175.4	-0.09375162	175.4	-0.09475011	175.4	-0.08407605	175.4	-0.05657242
175.61	0.5124146	175.61	0.5351048	175.61	0.592056	175.61	0.643154	175.61	0.5847473	175.61	0.5591313	175.61	0.5845904	175.61	0.03386451	175.6	-0.09920866	175.6	-0.1246319	175.6	-0.1138008	175.6	-0.1173296	175.6	-0.09204718	175.6	-0.09306331	175.6	-0.09002382	175.6	-0.05382178
175.81	0.5180458	175.81	0.5438469	175.81	0.5932094	175.81	0.6502887	175.81	0.5966921	175.81	0.5634778	175.81	0.5875127	175.81	0.03398636	175.8	-0.09325678	175.8	-0.1268306	175.8	-0.1113602	175.8	-0.1210503	175.8	-0.08927178	175.8	-0.09050126	175.8	-0.08246121	175.8	-0.05379973
176.01	0.5192861	176.01	0.5512756	176.01	0.601295	176.01	0.6481782	176.01	0.5958198	176.01	0.5663911	176.01	0.5887588	176.01	0.03383712	176	-0.09286999	176	-0.1252174	176	-0.1102529	176	-0.1187941	176	-0.08887134	176	-0.09565789	176	-0.08529377	176	-0.05845059
176.21	0.5229167	176.21	0.5521141	176.21	0.600007	176.21	0.6501142	176.21	0.6000847	176.21	0.5728874	176.21	0.5943138	176.21	0.03753257	176.2	-0.0935953	176.2	-0.1260998	176.2	-0.1084001	176.2	-0.1170758	176.2	-0.09318696	176.2	-0.08870758	176.2	-0.08119928	176.2	-0.05826026
176.43	0.5291066	176.43	0.5564677	176.43	0.6050956	176.43	0.6571074	176.43	0.6001104	176.43	0.5740374	176.43	0.6002578	176.43	0.03651426	176.4	-0.09624426	176.4	-0.1288168	176.4	-0.1130529	176.4	-0.1156547	176.4	-0.0908732	176.4	-0.0896664	176.4	-0.08609946	176.4	-0.05212745
176.61	0.5339689	176.61	0.5599639	176.61	0.6080964	176.61	0.658069	176.61	0.6062726	176.61	0.5776386	176.61	0.6032408	176.61	0.03391169	176.6	-0.09265817	176.6	-0.1237096	176.6	-0.1106281	176.6	-0.1133724	176.6	-0.0908007	176.6	-0.09052396	176.6	-0.08144305	176.6	-0.05096502
176.81	0.5380197	176.81	0.5620098	176.81	0.6148598	176.81	0.6596032	176.81	0.6081667	176.81	0.5790957	176.81	0.6086385	176.81	0.0374233	176.8	-0.09456248	176.8	-0.1217079	176.8	-0.1083226	176.8	-0.1186505	176.8	-0.09111173	176.8	-0.09027948	176.8	-0.08694801	176.8	-0.04862899
177.01	0.5397774	177.01	0.565623	177.01	0.6197253	177.01	0.6701087	177.01	0.6144383	177.01	0.5873657	177.01	0.6102881	177.01	0.04045751	177	-0.09578566	177	-0.1228353	177	-0.1094921	177	-0.1152694	177	-0.08760107	177	-0.09026576	177	-0.08494969	177	-0.05106206
177.21	0.5435056	177.21	0.5715084	177.21	0.622433	177.21	0.671728	177.21	0.6232784	177.21	0.5848801	177.21	0.6063737	177.21	0.03600441	177.2	-0.09482959	177.2	-0.1222417	177.2	-0.1097908	177.2	-0.1135449	177.2	-0.09413999	177.2	-0.09032925	177.2	-0.08266544	177.2	-0.05593423
177.41	0.5529839	177.41	0.5778602	177.41	0.6230026	177.41	0.6746379	177.41	0.628047	177.41	0.5908406	177.41	0.6192219	177.41	0.0364613	177.4	-0.09391357	177.4	-0.1232143	177.4	-0.109908	177.4	-0.1146591	177.4	-0.09090661	177.4	-0.09159334	177.4	-0.0855204	177.4	-0.05399565
177.61	0.5493928	177.61	0.5803305	177.61	0.6297891	177.61	0.6826	177.61	0.6249492	177.61	0.5985123	177.61	0.6206291	177.61	0.03685516	177.6	-0.09796004	177.6	-0.1215764	177.6	-0.1108506	177.6	-0.1177196	177.6	-0.09400398	177.6	-0.08715486	177.6	-0.08584625	177.6	-0.04815974
177.81	0.5539731	177.81	0.5837708	177.81	0.6292157	177.81	0.6852412	177.81	0.6285715	177.81	0.6044727	177.81	0.6244078	177.81	0.03586516	177.8	-0.09553897	177.8	-0.1204776	177.8	-0.1128772	177.8	-0.1143695	177.8	-0.09387676	177.8	-0.08768515	177.8	-0.0835998	177.8	-0.05681649
178.01	0.561001	178.01	0.582691	178.01	0.6344919	178.01	0.6863788	178.01	0.6294194	178.01	0.6044965	178.01	0.6283548	178.01	0.03854169	178	-0.09374966	178	-0.1274667	178	-0.1103583	178	-0.1130786	178	-0.09184435	178	-0.09355034	178	-0.0778003	178	-0.05373496
178.21	0.5604186	178.21	0.5898751	178.21	0.6414464	178.21	0.6911084	178.21	0.633476	178.21	0.6082842	178.21	0.6341784	178.21	0.03567694	178.2	-0.09444913	178.2	-0.1216749	178.2	-0.1043021	178.2	-0.1129883	178.2	-0.09361445	178.2	-0.09075718	178.2	-0.08180634	178.2	-0.05455571
178.41	0.5621173	178.41	0.5934649	178.41	0.6429698	178.41	0.6926739	178.41	0.638325	178.41	0.608551	178.41	0.6363469	178.41	0.03637759	178.4	-0.09023373	178.4	-0.1252687	178.4	-0.1139556	178.4	-0.1175404	178.4	-0.08807592	178.4	-0.09064578	178.4	-0.08975653	178.4	-0.05530184
178.61	0.5710468	178.61	0.5956677	178.61	0.6485574	178.61	0.6980596	178.61	0.6464853	178.61	0.6122919	178.61	0.6418139	178.61	0.0363378	178.6	-0.09526373	178.6	-0.1214985	178.6	-0.1053502	178.6	-0.1135263	178.6	-0.08990166	178.6	-0.08963342	178.6	-0.0858911	178.6	-0.05082269
178.81	0.5719813	178.81	0.6062464	178.81	0.6481799	178.81	0.703676	178.81	0.6516654	178.81	0.6175882	178.81	0.6402455	178.81	0.04427681	178.8	-0.09202271	178.8	-0.1277459	178.8	-0.1088656	178.8	-0.1156655	178.8	-0.093102	178.8	-0.08764084	178.8	-0.07804056	178.8	-0.05371381
179.01	0.5762095	179.01	0.6069641	179.01	0.6544511	179.01	0.7065749	179.01	0.6487363	179.01	0.616686	179.01	0.6459736	179.01	0.04110369	179	-0.0930573	179	-0.1216761	179	-0.1118485	179	-0.1147064	179	-0.08899773	179	-0.08951038	179	-0.08312045	179	-0.05551198
179.21	0.5827227	179.21	0.609228	179.21	0.6557706	179.21	0.7096893	179.21	0.6556904	179.21	0.6229207	179.21	0.6506676	179.21	0.03702376	179.2	-0.09096056	179.2	-0.1255106	179.2	-0.1097219	179.2	-0.1147987	179.2	-0.09038045	179.2	-0.08774339	179.2	-0.08001854	179.2	-0.05408656
179.41	0.5804957	179.41	0.6119916	179.41	0.6658976	179.41	0.7103887	179.41	0.6535423	179.41	0.626245	179.41	0.6545816	179.41	0.04211232	179.4	-0.08895265	179.4	-0.1232048	179.4	-0.1084778	179.4	-0.1134334	179.4	-0.09211945	179.4	-0.09141643	179.4	-0.08309376	179.4	-0.05342711
179.61	0.5891942	179.61	0.6134699	179.61	0.6683685	179.61	0.7159418	179.61	0.6626973	179.61	0.6325372	179.61	0.6575842	179.61	0.03898413	179.6	-0.09587082	179.6	-0.1240353	179.6	-0.1054308	179.6	-0.115943	179.6	-0.0886196	179.6	-0.08945391	179.6	-0.0765869	179.6	-0.05331329
179.81	0.5878556	179.81	0.6178718	179.81	0.6676385	179.81	0.7195972	179.81	0.6630685	179.81	0.6368359	179.81	0.6599244	179.81	0.03589161	179.8	-0.09178175	179.8	-0.1223324	179.8	-0.1096346	179.8	-0.1130672	179.8	-0.09205217	179.8	-0.09042425	179.8	-0.08201762	179.8	-0.05394398
180.01	0.5941817	180.01	0.622381	180.01	0.66997	180.01	0.7267851	180.01	0.6634738	180.01	0.6364673	180.01	0.6653935	180.01	0.03880518	180	-0.09488534	180	-0.1253563	180	-0.1061009	180	-0.1154312	180	-0.0887053	180	-0.08964032	180	-0.08232207	180	-0.05508761
180.21	0.5936272	180.21	0.6247905	180.21	0.6751703	180.21	0.7284434	180.21	0.670232	180.21	0.6438571	180.21	0.663548	180.21	0.03909029	180.2	-0.09006916	180.2	-0.1232401	180.2	-0.1057023	180.2	-0.1136133	180.2	-0.0907712	180.2	-0.08930571	180.2	-0.08628849	180.2	-0.05400204
180.41	0.5957787	180.41	0.6256081	180.41	0.6773157	180.41	0.7258736	180.41	0.6729863	180.41	0.6423757	180.41	0.6691794	180.41	0.03742571	180.4	-0.09444031	180.4	-0.119965	180.4	-0.1111265	180.4	-0.1130793	180.4	-0.08886789	180.4	-0.09240831	180.4	-0.08166052	180.4	-0.05396404
180.61	0.6035514	180.61	0.6311184	180.61	0.6805161	180.61	0.7317815	180.61	0.6742318	180.61	0.646977	180.61	0.6729979	180.61	0.03997161	180.6	-0.08764515	180.6	-0.1200753	180.6	-0.1062761	180.6	-0.1135311	180.6	-0.08919013	180.6	-0.09271752	180.6	-0.08703825	180.6	-0.04976914
180.81	0.6038744	180.81	0.6357983	180.81	0.683762	180.81	0.7314265	180.81	0.6810736	180.81	0.6482687	180.81	0.6817397	180.81	0.03826937	180.8	-0.09190089	180.8	-0.122735	180.8	-0.1069921	180.8	-0.1155474	180.8	-0.08881047	180.8	-0.08877646	180.8	-0.08569816	180.8	-0.04914749
181.01	0.6093131	181.01	0.6398621	181.01	0.6897507	181.01	0.7390416	181.01	0.6810469	181.01	0.6532919	181.01	0.6809729	181.01	0.04134834	181	-0.08993588	181	-0.1239284	181	-0.110452	181	-0.1120534	181	-0.09008172	181	-0.08975524	181	-0.08041269	181	-0.05502602
181.21	0.6121611	181.21	0.6458936	181.21	0.6876441	181.21	0.7389101	181.21	0.686612	181.21	0.6583906	181.21	0.6857243	181.21	0.04421354	181.2	-0.09506398	181.2	-0.1199303	181.2	-0.1094894	181.2	-0.115316	181.2	-0.09116013	181.2	-0.09003542	181.2	-0.08254282	181.2	-0.04940964
181.41	0.6154296	181.41	0.64369	181.41	0.6924103	181.41	0.7476224	181.41	0.6885521	181.41	0.6600431	181.41	0.686522	181.41	0.03778299	181.4	-0.09564815	181.4	-0.1189382	181.4	-0.1067839	181.4	-0.114968	181.4	-0.08986185	181.4	-0.08769145	181.4	-0.08454601	181.4	-0.05153148
181.61	0.6186389	181.61	0.6454467	181.61	0.6938915	181.61	0.7481083	181.61	0.6964157	181.61	0.6633726	181.61	0.691146	181.61	0.03912191	181.6	-0.09200752	181.6	-0.1215288	181.6	-0.1113914	181.6	-0.1139814	181.6	-0.08970732	181.6	-0.08760019	181.6	-0.08047239	181.6	-0.04880811
181.81	0.6203356	181.81	0.6474983	181.81	0.698622	181.81	0.7481289	181.81	0.6944883	181.81	0.667367	181.81	0.6977073	181.81	0.03991604	181.8	-0.09318633	181.8	-0.1235076	181.8	-0.1039348	181.8	-0.1130433	181.8	-0.09050411	181.8	-0.09093475	181.8	-0.07992931	181.8	-0.05019759
182.01	0.6260809	182.01	0.6525853	182.01	0.7039685	182.01	0.7581412	182.01	0.7024748	182.01	0.6656216	182.01	0.6965293	182.01	0.03994754	182	-0.09294564	182	-0.1224791	182	-0.1080183	182	-0.1149254	182	-0.08596854	182	-0.08650057	182	-0.08492164	182	-0.05269406
182.21	0.6244181	182.21	0.658814	182.21	0.7070399	182.21	0.7584679	182.21	0.6996317	182.21	0.6707274	182.21	0.7029265	182.21	0.03906831	182.2	-0.09461617	182.2	-0.1228477	182.2	-0.1099756	182.2	-0.1131197	182.2	-0.09048804	182.2	-0.08829576	182.2	-0.08566529	182.2	-0.05655587
182.41	0.6310295	182.41	0.6612981	182.41	0.707607	182.41	0.7607738	182.41	0.7099831	182.41	0.6763447	182.41	0.7041548	182.41	0.04226952	182.4	-0.09287558	182.4	-0.1196169	182.4	-0.1083644	182.4	-0.1165331	182.4	-0.08947957	182.4	-0.08868716	182.4	-0.07910436	182.4	-0.05353118
182.61	0.628482	182.61	0.6644261	182.61	0.7087741	182.61	0.7628905	182.61	0.7061713	182.61	0.6807844	182.61	0.7082189	182.61	0.04192319	182.6	-0.09249682	182.6	-0.1175618	182.6	-0.1087944	182.6	-0.111716	182.6	-0.08888563	182.6	-0.08992741	182.6	-0.0779792	182.6	-0.05095071
182.81	0.6370507	182.81	0.6684821	182.81	0.7163456	182.81	0.7692913	182.81	0.7123312	182.81	0.6833321	182.81	0.710584	182.81	0.0408778	182.8	-0.09525613	182.8	-0.1229009	182.8	-0.107754	182.8	-0.1131039	182.8	-0.08718114	182.8	-0.08643473	182.8	-0.08163383	182.8	-0.04909097
183.01	0.6391207	183.01	0.6650538	183.01	0.7189026	183.01	0.773038	183.01	0.7118782	183.01	0.682547	183.01	0.7131048	183.01	0.03959498	183	-0.09193893	183	-0.1209845	183	-0.1054124	183	-0.1120942	183	-0.08973365	183	-0.08916088	183	-0.0809933	183	-0.0476702
183.21	0.6395187	183.21	0.6715852	183.21	0.7204347	183.21	0.769649	183.21	0.7148626	183.21	0.6889882	183.21	0.7178617	183.21	0.04038249	183.2	-0.09033187	183.2	-0.1234545	183.2	-0.1092411	183.2	-0.1127498	183.2	-0.08376855	183.2	-0.08964831	183.2	-0.08271216	183.2	-0.05003449
183.41	0.6412131	183.41	0.6778349	183.41	0.7236305	183.41	0.7755007	183.41	0.7229414	183.41	0.6920233	183.41	0.7181149	183.41	0.04541756	183.4	-0.09290283	183.4	-0.1230959	183.4	-0.1101062	183.4	-0.1103312	183.4	-0.08833341	183.4	-0.08821993	183.4	-0.07909208	183.4	-0.05062773
183.61	0.6463258	183.61	0.6738816	183.61	0.7264066	183.61	0.7771474	183.61	0.724353	183.61	0.6915358	183.61	0.7247488	183.61	0.04378439	183.6	-0.09209172	183.6	-0.1221435	183.6	-0.107501	183.6	-0.1068847	183.6	-0.08881899	183.6	-0.08727263	183.6	-0.07927693	183.6	-0.05099739
183.81	0.652778	183.81	0.6833383	183.81	0.7295741	183.81	0.7810494	183.81	0.7245886	183.81	0.6973025	183.81	0.7226973	183.81	0.04156707	183.8	-0.09264772	183.8	-0.1222939	183.8	-0.1095216	183.8	-0.1130046	183.8	-0.08506837	183.8	-0.08892717	183.8	-0.08190363	183.8	-0.05498701
184.01	0.6535608	184.01	0.6820545	184.01	0.7330726	184.01	0.7862788	184.01	0.7218064	184.01	0.6980675	184.01	0.7300619	184.01	0.04401297	184	-0.09450334	184	-0.1208314	184	-0.1071781	184	-0.1128119	184	-0.09184831	184	-0.09025986	184	-0.07804193	184	-0.04954423
184.21	0.6610028	184.21	0.6855918	184.21	0.7398383	184.21	0.7894503	184.21	0.7292025	184.21	0.7008699	184.21	0.7287627	184.21	0.0431668	184.2	-0.09348369	184.2	-0.1185578	184.2	-0.1100762	184.2	-0.1091464	184.2	-0.08226151	184.2	-0.0925497	184.2	-0.07916819	184.2	-0.05512803
184.41	0.6590393	184.41	0.6899523	184.41	0.7406404	184.41	0.7893881	184.41	0.7316265	184.41	0.7058222	184.41	0.737368	184.41	0.04151624	184.4	-0.09104489	184.4	-0.1243778	184.4	-0.1084846	184.4	-0.1136394	184.4	-0.08843164	184.4	-0.08525947	184.4	-0.08150911	184.4	-0.05198105
184.61	0.6654149	184.61	0.6905617	184.61	0.748706	184.61	0.7960359	184.61	0.7376497	184.61	0.7049875	184.61	0.7405697	184.61	0.04562564	184.6	-0.09151907	184.6	-0.1194734	184.6	-0.107334	184.6	-0.1072172	184.6	-0.08417355	184.6	-0.0867266	184.6	-0.07811029	184.6	-0.04743325
184.81	0.6637698	184.81	0.6961537	184.81	0.7416877	184.81	0.7951059	184.81	0.7392716	184.81	0.7124689	184.81	0.7401993	184.81	0.04209702	184.8	-0.0891043	184.8	-0.1160152	184.8	-0.1058404	184.8	-0.112046	184.8	-0.08832876	184.8	-0.08704406	184.8	-0.08099937	184.8	-0.04679345
185.01	0.6689906	185.01	0.7011766	185.01	0.7474214	185.01	0.8037407	185.01	0.7424055	185.01	0.7191039	185.01	0.7465935	185.01	0.04488825	185	-0.09226026	185	-0.1198353	185	-0.1048525	185	-0.1118735	185	-0.0870976	185	-0.08517479	185	-0.07824972	185	-0.04903369
185.21	0.671393	185.21	0.7050513	185.21	0.7492955	185.21	0.8043535	185.21	0.7431163	185.21	0.7208502	185.21	0.7494627	185.21	0.03999887	185.2	-0.08731509	185.2	-0.1194702	185.2	-0.1080094	185.2	-0.1099652	185.2	-0.08767386	185.2	-0.08552488	185.2	-0.08080926	185.2	-0.05456493
185.41	0.6739428	185.41	0.7067212	185.41	0.7550615	185.41	0.8071857	185.41	0.7503528	185.41	0.7237768	185.41	0.7511594	185.41	0.04460629	185.4	-0.09003069	185.4	-0.1210883	185.4	-0.1022035	185.4	-0.1089882	185.4	-0.08616629	185.4	-0.08282071	185.4	-0.07950655	185.4	-0.05178409
185.61	0.6734157	185.61	0.708141	185.61	0.7534217	185.61	0.8065329	185.61	0.7570313	185.61	0.7235168	185.61	0.7568573	185.61	0.04646548	185.6	-0.08820692	185.6	-0.1214981	185.6	-0.1053856	185.6	-0.1111594	185.6	-0.08949752	185.6	-0.08764947	185.6	-0.08064656	185.6	-0.04903241
185.81	0.6840839	185.81	0.7122441	185.81	0.7605732	185.81	0.8114088	185.81	0.757633	185.81	0.7220148	185.81	0.7542874	185.81	0.04065092	185.8	-0.08908133	185.8	-0.1208028	185.8	-0.1082446	185.8	-0.1144032	185.8	-0.08617457	185.8	-0.08592688	185.8	-0.07896575	185.8	-0.05366882
186.01	0.6789654	186.01	0.7165115	186.01	0.7599202	186.01	0.8120905	186.01	0.7563432	186.01	0.7304071	186.01	0.7610784	186.01	0.03959184	186	-0.08387103	186	-0.1196909	186	-0.1081477	186	-0.1069253	186	-0.08832633	186	-0.08343502	186	-0.07475486	186	-0.05056081
186.21	0.6820669	186.21	0.719022	186.21	0.7668683	186.21	0.8217162	186.21	0.7598933	186.21	0.7321286	186.21	0.7613401	186.21	0.04712784	186.2	-0.08917536	186.2	-0.1182128	186.2	-0.1073925	186.2	-0.1148961	186.2	-0.0851639	186.2	-0.08636826	186.2	-0.08093698	186.2	-0.05145673
186.41	0.6889692	186.41	0.7194245	186.41	0.7654688	186.41	0.8196537	186.41	0.7653766	186.41	0.7344522	186.41	0.7669637	186.41	0.04134006	186.4	-0.08822395	186.4	-0.1170119	186.4	-0.1068675	186.4	-0.1064754	186.4	-0.08873995	186.4	-0.08243552	186.4	-0.07520227	186.4	-0.05153106
186.61	0.690677	186.61	0.7226524	186.61	0.7700182	186.61	0.8181261	186.61	0.762467	186.61	0.7365106	186.61	0.7674951	186.61	0.04180845	186.6	-0.09494106	186.6	-0.1234348	186.6	-0.1070561	186.6	-0.1092762	186.6	-0.08554354	186.6	-0.08481669	186.6	-0.07645828	186.6	-0.05028159
186.81	0.692107	186.81	0.7236482	186.81	0.7733493	186.81	0.8259726	186.81	0.7678779	186.81	0.7450944	186.81	0.7705379	186.81	0.04402871	186.8	-0.08889501	186.8	-0.1160241	186.8	-0.1029966	186.8	-0.1080391	186.8	-0.08855768	186.8	-0.08453536	186.8	-0.07828368	186.8	-0.04906192
187.01	0.6975837	187.01	0.7273079	187.01	0.7762793	187.01	0.8304522	187.01	0.7710649	187.01	0.741548	187.01	0.7728418	187.01	0.04545759	187	-0.09341113	187	-0.1189771	187	-0.1113408	187	-0.1087068	187	-0.09197184	187	-0.08965982	187	-0.08075689	187	-0.04802042
187.21	0.6974358	187.21	0.7319251	187.21	0.7758617	187.21	0.8260761	187.21	0.7748452	187.21	0.7437419	187.21	0.7741641	187.21	0.04371158	187.2	-0.08892351	187.2	-0.1229743	187.2	-0.1061478	187.2	-0.1084894	187.2	-0.08769739	187.2	-0.09187397	187.2	-0.07581079	187.2	-0.05164874
187.41	0.6982782	187.41	0.7342309	187.41	0.7776422	187.41	0.8360505	187.41	0.7810271	187.41	0.7493946	187.41	0.7781542	187.41	0.04519768	187.4	-0.0926284	187.4	-0.1201552	187.4	-0.105349	187.4	-0.110651	187.4	-0.0839219	187.4	-0.08955003	187.4	-0.0791337	187.4	-0.0538641
187.61	0.7024251	187.61	0.7354446	187.61	0.7797747	187.61	0.8436911	187.61	0.7761905	187.61	0.7550379	187.61	0.7797314	187.61	0.04582001	187.6	-0.09006053	187.6	-0.1153263	187.6	-0.09914904	187.6	-0.1139999	187.6	-0.08895909	187.6	-0.08164068	187.6	-0.07462257	187.6	-0.04430452
187.81	0.7038575	187.81	0.7374772	187.81	0.7876797	187.81	0.8442116	187.81	0.7827001	187.81	0.7477396	187.81	0.7832186	187.81	0.04511471	187.8	-0.08769796	187.8	-0.1208577	187.8	-0.1045257	187.8	-0.1107306	187.8	-0.08839889	187.8	-0.08287323	187.8	-0.07566316	187.8	-0.04883284
188.01	0.7075515	188.01	0.7386615	188.01	0.7885513	188.01	0.8425981	188.01	0.7871478	188.01	0.7609493	188.01	0.7928937	188.01	0.0432256	188	-0.08825064	188	-0.1151033	188	-0.1085495	188	-0.1084144	188	-0.08520754	188	-0.08631938	188	-0.08155867	188	-0.04568386
188.21	0.711549	188.21	0.7472475	188.21	0.7891924	188.21	0.8447241	188.21	0.7925059	188.21	0.759524	188.21	0.7919983	188.21	0.04455886	188.2	-0.08908723	188.2	-0.1141964	188.2	-0.1081602	188.2	-0.1142234	188.2	-0.08534887	188.2	-0.08427332	188.2	-0.07681194	188.2	-0.04439803
188.41	0.7154083	188.41	0.7463131	188.41	0.7930033	188.41	0.8454109	188.41	0.7908145	188.41	0.7605475	188.41	0.7958416	188.41	0.04582712	188.4	-0.08945155	188.4	-0.117064	188.4	-0.1061711	188.4	-0.10955	188.4	-0.08402452	188.4	-0.08526009	188.4	-0.08096348	188.4	-0.05201084
188.61	0.7169797	188.61	0.7503694	188.61	0.7982966	188.61	0.8505715	188.61	0.7940666	188.61	0.7663718	188.61	0.7978073	188.61	0.04283072	188.6	-0.08361886	188.6	-0.1225266	188.6	-0.1031123	188.6	-0.1087215	188.6	-0.08118313	188.6	-0.0822995	188.6	-0.07791365	188.6	-0.04673553
188.81	0.7194833	188.81	0.7543448	188.81	0.7967757	188.81	0.8527583	188.81	0.7946576	188.81	0.7662446	188.81	0.7984741	188.81	0.04761872	188.8	-0.09006948	188.8	-0.1187965	188.8	-0.1053572	188.8	-0.1116278	188.8	-0.08386068	188.8	-0.09104548	188.8	-0.07481322	188.8	-0.05083478
189.01	0.7178677	189.01	0.760179	189.01	0.8012926	189.01	0.8520223	189.01	0.7960257	189.01	0.7693588	189.01	0.8020601	189.01	0.04709088	189	-0.08550984	189	-0.1178932	189	-0.1015147	189	-0.1068907	189	-0.0822816	189	-0.08876967	189	-0.07894659	189	-0.04834801
189.21	0.7216075	189.21	0.7544367	189.21	0.8050045	189.21	0.8580158	189.21	0.8012357	189.21	0.7715937	189.21	0.8059565	189.21	0.04786607	189.2	-0.09024037	189.2	-0.1129958	189.2	-0.1027894	189.2	-0.1096528	189.2	-0.08464819	189.2	-0.08736178	189.2	-0.07468779	189.2	-0.04718384
189.41	0.7252473	189.41	0.7659864	189.41	0.809139	189.41	0.8610389	189.41	0.8026772	189.41	0.7758723	189.41	0.8048977	189.41	0.04988171	189.4	-0.09243032	189.4	-0.1157717	189.4	-0.09974095	189.4	-0.1101548	189.4	-0.08270865	189.4	-0.08194476	189.4	-0.07923189	189.4	-0.04942876
189.61	0.7329111	189.61	0.7672942	189.61	0.8088076	189.61	0.862164	189.61	0.7997248	189.61	0.7748355	189.61	0.8088055	189.61	0.04655399	189.6	-0.09043383	189.6	-0.1164309	189.6	-0.1053868	189.6	-0.109331	189.6	-0.08743285	189.6	-0.08920508	189.6	-0.07614079	189.6	-0.04640048
189.81	0.728663	189.81	0.7651839	189.81	0.8156441	189.81	0.8668135	189.81	0.8084444	189.81	0.7809209	189.81	0.8103731	189.81	0.0448191	189.8	-0.08933147	189.8	-0.1194684	189.8	-0.1062914	189.8	-0.109826	189.8	-0.0863899	189.8	-0.08385043	189.8	-0.07601795	189.8	-0.04962683
190.01	0.7330546	190.01	0.7719084	190.01	0.8125005	190.01	0.8677247	190.01	0.8115267	190.01	0.784073	190.01	0.8168811	190.01	0.04960901	190	-0.08490487	190	-0.1171893	190	-0.1023226	190	-0.1082577	190	-0.08323895	190	-0.08225109	190	-0.07690641	190	-0.04745673
190.21	0.7354729	190.21	0.7733852	190.21	0.8178577	190.21	0.8669328	190.21	0.8132107	190.21	0.7826706	190.21	0.8171952	190.21	0.04490596	190.2	-0.08824575	190.2	-0.118564	190.2	-0.09996103	190.2	-0.1035386	190.2	-0.08362217	190.2	-0.08325117	190.2	-0.07491245	190.2	-0.0495293
190.41	0.7363214	190.41	0.7784511	190.41	0.8189093	190.41	0.8780075	190.41	0.8161982	190.41	0.7893452	190.41	0.8228745	190.41	0.04524711	190.4	-0.08947223	190.4	-0.1167598	190.4	-0.1058944	190.4	-0.108104	190.4	-0.08314566	190.4	-0.08253546	190.4	-0.07998622	190.4	-0.04655695
190.61	0.7392212	190.61	0.7785649	190.61	0.8216079	190.61	0.8722594	190.61	0.8164046	190.61	0.7876602	190.61	0.8246658	190.61	0.04988417	190.6	-0.08559971	190.6	-0.1101422	190.6	-0.1025618	190.6	-0.1092412	190.6	-0.08409428	190.6	-0.0863278	190.6	-0.07279947	190.6	-0.05167005
190.81	0.7416495	190.81	0.7803516	190.81	0.8234007	190.81	0.8761649	190.81	0.8191718	190.81	0.7970949	190.81	0.8242376	190.81	0.04381409	190.8	-0.09053025	190.8	-0.1155996	190.8	-0.103527	190.8	-0.1029563	190.8	-0.08214707	190.8	-0.08738463	190.8	-0.07464437	190.8	-0.05050802
191.01	0.7488936	191.01	0.7829177	191.01	0.8271694	191.01	0.8819224	191.01	0.8224136	191.01	0.7963774	191.01	0.8275203	191.01	0.04646471	191	-0.08401028	191	-0.1149831	191	-0.1046651	191	-0.1086945	191	-0.08329213	191	-0.08396793	191	-0.07619742	191	-0.04827698
191.21	0.7502818	191.21	0.7847258	191.21	0.8334612	191.21	0.8844954	191.21	0.8239612	191.21	0.7970782	191.21	0.8278001	191.21	0.0454407	191.2	-0.08921085	191.2	-0.1174533	191.2	-0.1000783	191.2	-0.1068798	191.2	-0.08451887	191.2	-0.08650915	191.2	-0.0773393	191.2	-0.04750419
191.41	0.752836	191.41	0.7849757	191.41	0.830951	191.41	0.8853311	191.41	0.8258598	191.41	0.8001708	191.41	0.8339233	191.41	0.04711423	191.4	-0.0856737	191.4	-0.1181498	191.4	-0.1036482	191.4	-0.1024319	191.4	-0.08251271	191.4	-0.080419	191.4	-0.07587623	191.4	-0.0518778
191.61	0.7487937	191.61	0.7874175	191.61	0.835561	191.61	0.8883963	191.61	0.8297083	191.61	0.8009381	191.61	0.8341898	191.61	0.04863367	191.6	-0.08804161	191.6	-0.1169081	191.6	-0.1027296	191.6	-0.1097918	191.6	-0.08330835	191.6	-0.08344925	191.6	-0.0771405	191.6	-0.05039304
191.81	0.7531721	191.81	0.795115	191.81	0.8374626	191.81	0.891375	191.81	0.8303077	191.81	0.8013721	191.81	0.8374227	191.81	0.04727574	191.8	-0.08630937	191.8	-0.1154448	191.8	-0.1045751	191.8	-0.1125852	191.8	-0.08409601	191.8	-0.08691277	191.8	-0.07703287	191.8	-0.0471735
192.01	0.7552024	192.01	0.7954688	192.01	0.839931	192.01	0.8889744	192.01	0.8308173	192.01	0.8112344	192.01	0.8446365	192.01	0.04763996	192	-0.09109167	192	-0.1183925	192	-0.09777246	192	-0.1067756	192	-0.08016514	192	-0.08404339	192	-0.07556123	192	-0.04714009
192.21	0.7586153	192.21	0.7964165	192.21	0.8404885	192.21	0.8988866	192.21	0.8385998	192.21	0.8133177	192.21	0.8431673	192.21	0.04562459	192.2	-0.08905027	192.2	-0.1158439	192.2	-0.09679353	192.2	-0.1051848	192.2	-0.08249039	192.2	-0.08162528	192.2	-0.07745571	192.2	-0.04463799
192.41	0.759926	192.41	0.7954271	192.41	0.8490262	192.41	0.8976399	192.41	0.8390741	192.41	0.8134957	192.41	0.8469611	192.41	0.04449749	192.4	-0.08341733	192.4	-0.1207729	192.4	-0.1020701	192.4	-0.1107456	192.4	-0.07772816	192.4	-0.08170394	192.4	-0.07437816	192.4	-0.04716986
192.61	0.7641776	192.61	0.8028696	192.61	0.8523043	192.61	0.8984877	192.61	0.8408208	192.61	0.8151892	192.61	0.8458066	192.61	0.04662541	192.6	-0.08830733	192.6	-0.1087185	192.6	-0.1018015	192.6	-0.1087425	192.6	-0.08160599	192.6	-0.07958151	192.6	-0.07561224	192.6	-0.05071636
192.81	0.7659187	192.81	0.8052197	192.81	0.8505838	192.81	0.9062726	192.81	0.8464037	192.81	0.8155071	192.81	0.8495285	192.81	0.05284011	192.8	-0.09429653	192.8	-0.1113098	192.8	-0.09985827	192.8	-0.104507	192.8	-0.08178671	192.8	-0.08328856	192.8	-0.07769617	192.8	-0.04664944
193.01	0.7670445	193.01	0.8091346	193.01	0.8512415	193.01	0.9095594	193.01	0.8413407	193.01	0.8187514	193.01	0.8502312	193.01	0.04893547	193	-0.08720876	193	-0.118175	193	-0.09954554	193	-0.1059512	193	-0.0809644	193	-0.08592232	193	-0.07774258	193	-0.04662181
193.21	0.7704914	193.21	0.8101307	193.21	0.8520623	193.21	0.9088265	193.21	0.8472897	193.21	0.8212156	193.21	0.8576986	193.21	0.04828141	193.2	-0.0842794	193.2	-0.115781	193.2	-0.1019371	193.2	-0.1079783	193.2	-0.0804682	193.2	-0.08598263	193.2	-0.07574744	193.2	-0.04449356
193.41	0.7764028	193.41	0.8122491	193.41	0.8581731	193.41	0.9107468	193.41	0.8544393	193.41	0.8166355	193.41	0.8581678	193.41	0.04816897	193.4	-0.0875527	193.4	-0.1161345	193.4	-0.0969872	193.4	-0.1084649	193.4	-0.08160798	193.4	-0.08449749	193.4	-0.07281808	193.4	-0.05228707
193.61	0.7734115	193.61	0.816458	193.61	0.8587002	193.61	0.9113672	193.61	0.8523047	193.61	0.8235754	193.61	0.8616921	193.61	0.0500397	193.6	-0.08551018	193.6	-0.1177321	193.6	-0.1015172	193.6	-0.1059069	193.6	-0.08170637	193.6	-0.08648976	193.6	-0.07390165	193.6	-0.04715268
193.81	0.7750255	193.81	0.8204666	193.81	0.8606418	193.81	0.9121798	193.81	0.8505284	193.81	0.8238224	193.81	0.8668401	193.81	0.04487428	193.8	-0.08225481	193.8	-0.1127717	193.8	-0.09831868	193.8	-0.1110948	193.8	-0.08001839	193.8	-0.08171761	193.8	-0.0787036	193.8	-0.04503792
194.01	0.7811978	194.01	0.8173212	194.01	0.8653697	194.01	0.9188832	194.01	0.8566729	194.01	0.8296671	194.01	0.8711125	194.01	0.05175541	194	-0.08865027	194	-0.1177402	194	-0.09951167	194	-0.1069586	194	-0.08445092	194	-0.08159805	194	-0.07532076	194	-0.05225824
194.21	0.7807974	194.21	0.8189292	194.21	0.8648943	194.21	0.920289	194.21	0.8543066	194.21	0.8320794	194.21	0.8659295	194.21	0.05014676	194.2	-0.08842538	194.2	-0.1151308	194.2	-0.09826741	194.2	-0.1087054	194.2	-0.08039315	194.2	-0.08550546	194.2	-0.07788823	194.2	-0.04835698
194.41	0.7842171	194.41	0.8221638	194.41	0.8690807	194.41	0.9197506	194.41	0.8641171	194.41	0.8345568	194.41	0.8668762	194.41	0.04526871	194.4	-0.08727046	194.4	-0.1153315	194.4	-0.1033486	194.4	-0.1069423	194.4	-0.08443549	194.4	-0.08431722	194.4	-0.07176996	194.4	-0.04915201
194.61	0.7857784	194.61	0.8268132	194.61	0.8700573	194.61	0.9184266	194.61	0.8638249	194.61	0.833963	194.61	0.8717479	194.61	0.04822318	194.6	-0.08714075	194.6	-0.1133101	194.6	-0.1044955	194.6	-0.1069339	194.6	-0.08015422	194.6	-0.08384263	194.6	-0.07699334	194.6	-0.04890228
194.81	0.7910728	194.81	0.8259571	194.81	0.8714434	194.81	0.9202662	194.81	0.8643054	194.81	0.8388135	194.81	0.8741527	194.81	0.0456954	194.8	-0.08767439	194.8	-0.1162372	194.8	-0.09811551	194.8	-0.1049994	194.8	-0.08085912	194.8	-0.08098371	194.8	-0.07235847	194.8	-0.04663974
195.01	0.7846443	195.01	0.8297256	195.01	0.8725668	195.01	0.9335754	195.01	0.8660683	195.01	0.8395768	195.01	0.8769393	195.01	0.04789633	195	-0.09022121	195	-0.1185304	195	-0.1010438	195	-0.1071845	195	-0.08211605	195	-0.08220414	195	-0.07106551	195	-0.0452446
195.21	0.7904081	195.21	0.8307108	195.21	0.8750654	195.21	0.9275025	195.21	0.8667251	195.21	0.8491464	195.21	0.8784408	195.21	0.05241595	195.2	-0.08712707	195.2	-0.1140864	195.2	-0.09912211	195.2	-0.1071504	195.2	-0.07621185	195.2	-0.08393314	195.2	-0.07232909	195.2	-0.04769857
195.41	0.7954343	195.41	0.8355153	195.41	0.8806415	195.41	0.9347734	195.41	0.8736543	195.41	0.8466762	195.41	0.8782783	195.41	0.05094487	195.4	-0.08690394	195.4	-0.1126263	195.4	-0.09998702	195.4	-0.1086811	195.4	-0.07981105	195.4	-0.08224308	195.4	-0.07758994	195.4	-0.04712457
195.61	0.7975826	195.61	0.8370833	195.61	0.879516	195.61	0.9367583	195.61	0.8708483	195.61	0.8482953	195.61	0.878683	195.61	0.05142155	195.6	-0.0881412	195.6	-0.117572	195.6	-0.09988962	195.6	-0.1070745	195.6	-0.07613347	195.6	-0.08029722	195.6	-0.07590609	195.6	-0.04379341
195.81	0.7982653	195.81	0.8314872	195.81	0.8840064	195.81	0.9371065	195.81	0.8755401	195.81	0.8483629	195.81	0.8917124	195.81	0.04865658	195.8	-0.08722699	195.8	-0.1168224	195.8	-0.09974423	195.8	-0.1073234	195.8	-0.08205006	195.8	-0.08277857	195.8	-0.07046852	195.8	-0.04681188
196.01	0.7990403	196.01	0.840974	196.01	0.8830513	196.01	0.9381949	196.01	0.8785855	196.01	0.8540983	196.01	0.8860272	196.01	0.0476722	196	-0.08886825	196	-0.1156109	196	-0.09973784	196	-0.1086351	196	-0.08357838	196	-0.08087922	196	-0.07258829	196	-0.04537452
196.21	0.8047561	196.21	0.8394265	196.21	0.8846614	196.21	0.9439897	196.21	0.8805603	196.21	0.8509861	196.21	0.8898975	196.21	0.05209944	196.2	-0.08987485	196.2	-0.1130159	196.2	-0.09873547	196.2	-0.1046129	196.2	-0.07689791	196.2	-0.08243071	196.2	-0.07085256	196.2	-0.05120563
196.41	0.8037833	196.41	0.8481707	196.41	0.885999	196.41	0.9415527	196.41	0.8815423	196.41	0.8599308	196.41	0.8902579	196.41	0.05165394	196.4	-0.08391482	196.4	-0.1151755	196.4	-0.1007163	196.4	-0.1086978	196.4	-0.07946635	196.4	-0.08544141	196.4	-0.07545049	196.4	-0.0486786
196.61	0.8056061	196.61	0.8483865	196.61	0.8926851	196.61	0.9433808	196.61	0.8856307	196.61	0.8569636	196.61	0.8936637	196.61	0.05241558	196.6	-0.08133525	196.6	-0.1114419	196.6	-0.09749264	196.6	-0.1072325	196.6	-0.07837345	196.6	-0.08177946	196.6	-0.07140306	196.6	-0.03883386
196.81	0.8079515	196.81	0.8474393	196.81	0.8969077	196.81	0.9488821	196.81	0.8847815	196.81	0.8577207	196.81	0.895628	196.81	0.04963393	196.8	-0.08284496	196.8	-0.112563	196.8	-0.09698956	196.8	-0.1019017	196.8	-0.08646763	196.8	-0.08383216	196.8	-0.07631019	196.8	-0.0439085
197.01	0.8093278	197.01	0.8450803	197.01	0.8956833	197.01	0.9520923	197.01	0.8862273	197.01	0.857105	197.01	0.8985846	197.01	0.05223636	197	-0.0846106	197	-0.1152683	197	-0.0997122	197	-0.1042348	197	-0.08225498	197	-0.08093692	197	-0.07086898	197	-0.04587387
197.21	0.8126185	197.21	0.8530307	197.21	0.898373	197.21	0.9485094	197.21	0.8841653	197.21	0.8610436	197.21	0.9038407	197.21	0.05397132	197.2	-0.08588075	197.2	-0.1192841	197.2	-0.1005767	197.2	-0.1037937	197.2	-0.07518696	197.2	-0.08435709	197.2	-0.07187378	197.2	-0.04250756
197.41	0.8149851	197.41	0.8568168	197.41	0.9019995	197.41	0.951407	197.41	0.8947554	197.41	0.863167	197.41	0.903676	197.41	0.04863356	197.4	-0.08088089	197.4	-0.1133685	197.4	-0.09553636	197.4	-0.107203	197.4	-0.08318222	197.4	-0.08297741	197.4	-0.07364407	197.4	-0.0454478
197.61	0.8179339	197.61	0.8603423	197.61	0.8986243	197.61	0.9588376	197.61	0.8935179	197.61	0.8715668	197.61	0.9045591	197.61	0.05161899	197.6	-0.08166125	197.6	-0.116237	197.6	-0.09944014	197.6	-0.1063956	197.6	-0.07732753	197.6	-0.07731112	197.6	-0.07160985	197.6	-0.04433496
197.81	0.8220038	197.81	0.859712	197.81	0.9013057	197.81	0.955464	197.81	0.8995957	197.81	0.8694528	197.81	0.9085216	197.81	0.05491124	197.8	-0.0792162	197.8	-0.112536	197.8	-0.09587281	197.8	-0.1017309	197.8	-0.08324518	197.8	-0.07883983	197.8	-0.06799413	197.8	-0.0410222
198.01	0.8193147	198.01	0.8578621	198.01	0.9031283	198.01	0.9605916	198.01	0.8999462	198.01	0.8704617	198.01	0.908497	198.01	0.0505816	198	-0.0865832	198	-0.1122413	198	-0.09798396	198	-0.1079189	198	-0.08090551	198	-0.07996473	198	-0.07681109	198	-0.04727628
198.21	0.820873	198.21	0.8682816	198.21	0.9080408	198.21	0.9605779	198.21	0.9021066	198.21	0.8778877	198.21	0.9135346	198.21	0.05327049	198.2	-0.08451578	198.2	-0.1135155	198.2	-0.09940069	198.2	-0.1082204	198.2	-0.07918327	198.2	-0.08139832	198.2	-0.0729693	198.2	-0.04522002
198.41	0.8226185	198.41	0.8688497	198.41	0.9074695	198.41	0.9610757	198.41	0.9009389	198.41	0.8728677	198.41	0.9120256	198.41	0.05075466	198.4	-0.08742446	198.4	-0.1107952	198.4	-0.09829172	198.4	-0.09990975	198.4	-0.07770627	198.4	-0.07900854	198.4	-0.07324032	198.4	-0.04595961
198.61	0.8299334	198.61	0.866935	198.61	0.9136214	198.61	0.9605035	198.61	0.9044146	198.61	0.8772212	198.61	0.9144905	198.61	0.05399082	198.6	-0.08740965	198.6	-0.1079563	198.6	-0.09793865	198.6	-0.1058084	198.6	-0.07846971	198.6	-0.07994423	198.6	-0.0751864	198.6	-0.04703001
198.81	0.8267663	198.81	0.8714182	198.81	0.9139108	198.81	0.9665104	198.81	0.9103372	198.81	0.8772997	198.81	0.9168581	198.81	0.05223039	198.8	-0.08675827	198.8	-0.1148009	198.8	-0.09866484	198.8	-0.1058747	198.8	-0.07374531	198.8	-0.08243711	198.8	-0.06946231	198.8	-0.04451295
199.01	0.8305101	199.01	0.8726252	199.01	0.9100286	199.01	0.9679935	199.01	0.9024639	199.01	0.882772	199.01	0.9203643	199.01	0.04959266	199	-0.08953917	199	-0.1110453	199	-0.09847937	199	-0.1048964	199	-0.07781969	199	-0.08372778	199	-0.06818898	199	-0.04547832
199.21	0.826869	199.21	0.873051	199.21	0.9162336	199.21	0.9679871	199.21	0.9075679	199.21	0.8813322	199.21	0.9210508	199.21	0.05359159	199.2	-0.08219844	199.2	-0.1103875	199.2	-0.09713766	199.2	-0.1117851	199.2	-0.07967746	199.2	-0.08054663	199.2	-0.07215044	199.2	-0.04626824
199.41	0.8335732	199.41	0.873548	199.41	0.9248486	199.41	0.976781	199.41	0.9102325	199.41	0.8870662	199.41	0.9190962	199.41	0.05397416	199.43	-0.08317749	199.43	-0.1109015	199.43	-0.09761272	199.43	-0.102731	199.43	-0.07942569	199.43	-0.07953356	199.43	-0.07084662	199.43	-0.04412349
199.61	0.836303	199.61	0.8769747	199.61	0.9232225	199.61	0.9717717	199.61	0.9138474	199.61	0.8843275	199.61	0.9291442	199.61	0.05294817	199.6	-0.08525939	199.6	-0.1120633	199.6	-0.09563131	199.6	-0.104369	199.6	-0.07972283	199.6	-0.07871404	199.6	-0.07009839	199.6	-0.04451906
199.81	0.8371741	199.81	0.8778527	199.81	0.9201661	199.81	0.9750015	199.81	0.9167747	199.81	0.8934203	199.81	0.9277227	199.81	0.05606331	199.8	-0.08595634	199.8	-0.1116703	199.8	-0.09846084	199.8	-0.1039142	199.8	-0.07974467	199.8	-0.0795623	199.8	-0.07521018	199.8	-0.04449775
200.01	0.8389524	200.01	0.8830776	200.01	0.9287047	200.01	0.9729863	200.01	0.9184844	200.01	0.8872947	200.01	0.9364248	200.01	0.05067405	200	-0.08578719	200	-0.1127206	200	-0.09946712	200	-0.1023025	200	-0.07920558	200	-0.08225274	200	-0.07358253	200	-0.0446911
200.21	0.8367316	200.21	0.8860396	200.21	0.9256065	200.21	0.9789883	200.21	0.9200757	200.21	0.8970411	200.21	0.9305406	200.21	0.0557362	200.2	-0.08384827	200.2	-0.1135842	200.2	-0.09833941	200.2	-0.1089518	200.2	-0.08023401	200.2	-0.08023061	200.2	-0.07334128	200.2	-0.05154803
200.41	0.8477719	200.41	0.8869899	200.41	0.9333312	200.41	0.9769614	200.41	0.9209016	200.41	0.8928316	200.41	0.9343452	200.41	0.05543819	200.4	-0.07957889	200.4	-0.1143941	200.4	-0.09856971	200.4	-0.1035446	200.4	-0.0811148	200.4	-0.08347013	200.4	-0.07370026	200.4	-0.04368135
200.61	0.8464505	200.61	0.8881543	200.61	0.934225	200.61	0.9870048	200.61	0.9214219	200.61	0.8960317	200.61	0.9313279	200.61	0.06068471	200.6	-0.08512223	200.6	-0.1091937	200.6	-0.09714704	200.6	-0.1018926	200.6	-0.07483432	200.6	-0.08019418	200.6	-0.07101102	200.6	-0.04225926
200.81	0.8486834	200.81	0.8900445	200.81	0.9320557	200.81	0.9848788	200.81	0.9263436	200.81	0.8976477	200.81	0.936942	200.81	0.05665648	200.8	-0.08351737	200.8	-0.1112884	200.8	-0.09399578	200.8	-0.1022632	200.8	-0.07577618	200.8	-0.08290653	200.8	-0.07539902	200.8	-0.03733578
201.01	0.8533993	201.01	0.8934566	201.01	0.9360822	201.01	0.986189	201.01	0.9272563	201.01	0.9003192	201.01	0.938218	201.01	0.05678265	201	-0.08262181	201	-0.1108107	201	-0.09522464	201	-0.1038155	201	-0.07535575	201	-0.07549343	201	-0.07242437	201	-0.04135937
201.21	0.8479577	201.21	0.8941883	201.21	0.9363	201.21	0.987259	201.21	0.9304017	201.21	0.9046093	201.21	0.9410557	201.21	0.0504973	201.2	-0.08242263	201.2	-0.118233	201.2	-0.09858324	201.2	-0.1021687	201.2	-0.07829012	201.2	-0.07981322	201.2	-0.07269984	201.2	-0.04335201
201.41	0.847903	201.41	0.8950216	201.41	0.94028	201.41	0.9951801	201.41	0.9306277	201.41	0.9012313	201.41	0.9441133	201.41	0.0492273	201.4	-0.08533349	201.4	-0.1128856	201.4	-0.1020776	201.4	-0.1067544	201.4	-0.07760949	201.4	-0.07586814	201.4	-0.07158027	201.4	-0.04147202
201.61	0.851492	201.61	0.8907574	201.61	0.9406564	201.61	0.9974216	201.61	0.9346195	201.61	0.9053366	201.61	0.9500053	201.61	0.06030545	201.6	-0.08342555	201.6	-0.1142335	201.6	-0.09446754	201.6	-0.1051553	201.6	-0.07675802	201.6	-0.08298189	201.6	-0.06814936	201.6	-0.04453283
201.81	0.8561947	201.81	0.8966494	201.81	0.9421872	201.81	0.9946824	201.81	0.9313856	201.81	0.9107906	201.81	0.9448141	201.81	0.05604991	201.8	-0.08344238	201.8	-0.110661	201.8	-0.09772281	201.8	-0.1033169	201.8	-0.07765085	201.8	-0.08183249	201.8	-0.07264321	201.8	-0.04444596
202.01	0.859127	202.01	0.9033099	202.01	0.9456993	202.01	0.9993554	202.01	0.9334198	202.01	0.909341	202.01	0.9479001	202.01	0.05223959	202	-0.08592424	202	-0.1095735	202	-0.09272699	202	-0.1045668	202	-0.07873908	202	-0.07874294	202	-0.0688958	202	-0.04212906
202.21	0.859821	202.21	0.8990034	202.21	0.950214	202.21	1.00098	202.21	0.9400266	202.21	0.9148722	202.21	0.9522381	202.21	0.05385533	202.2	-0.08291193	202.2	-0.1132364	202.2	-0.09465313	202.2	-0.1021553	202.2	-0.07705946	202.2	-0.07515147	202.2	-0.06598628	202.2	-0.04102856
202.41	0.860148	202.41	0.9046783	202.41	0.9499122	202.41	1.002053	202.41	0.939163	202.41	0.9148757	202.41	0.9544719	202.41	0.05313368	202.4	-0.08489394	202.4	-0.1132928	202.4	-0.09723657	202.4	-0.1027139	202.4	-0.07867199	202.4	-0.07927415	202.4	-0.07129274	202.4	-0.04044348
202.61	0.8647254	202.61	0.9054167	202.61	0.9492374	202.61	1.002437	202.61	0.93817	202.61	0.9181289	202.61	0.9566371	202.61	0.05201861	202.6	-0.08233006	202.6	-0.1093268	202.6	-0.09762535	202.6	-0.1019118	202.6	-0.07871293	202.6	-0.08053046	202.6	-0.07074071	202.6	-0.04166669
202.81	0.8647118	202.81	0.9100016	202.81	0.9521569	202.81	1.006826	202.81	0.9448281	202.81	0.9145299	202.81	0.9522008	202.81	0.05450587	202.8	-0.08453603	202.8	-0.1090467	202.8	-0.0969993	202.8	-0.09926299	202.8	-0.07985865	202.8	-0.07909498	202.8	-0.06868364	202.8	-0.040181
203.01	0.8681525	203.01	0.9118161	203.01	0.9518457	203.01	1.009059	203.01	0.9450904	203.01	0.9158263	203.01	0.9551039	203.01	0.05178266	203	-0.08474238	203	-0.111073	203	-0.09874693	203	-0.1034944	203	-0.07949504	203	-0.0803218	203	-0.06987089	203	-0.0432662
203.21	0.8719475	203.21	0.9141747	203.21	0.9543085	203.21	1.007355	203.21	0.9453343	203.21	0.9197205	203.21	0.9580869	203.21	0.06006665	203.2	-0.0846718	203.2	-0.1140253	203.2	-0.09733953	203.2	-0.1061532	203.2	-0.08144956	203.2	-0.08183987	203.2	-0.07161537	203.2	-0.03846508
203.41	0.873652	203.41	0.9126977	203.41	0.9567658	203.41	1.010641	203.41	0.9481016	203.41	0.9184463	203.41	0.9621689	203.41	0.05429632	203.4	-0.08466036	203.4	-0.114416	203.4	-0.09816734	203.4	-0.1067342	203.4	-0.07628622	203.4	-0.08230512	203.4	-0.07014177	203.4	-0.03988612
203.61	0.870204	203.61	0.9141133	203.61	0.9591699	203.61	1.009685	203.61	0.9466457	203.61	0.9239835	203.61	0.9662232	203.61	0.05451402	203.6	-0.07877262	203.6	-0.1161125	203.6	-0.09927161	203.6	-0.1038365	203.6	-0.07673746	203.6	-0.07849208	203.6	-0.07749716	203.6	-0.04181377
203.81	0.8739877	203.81	0.9139115	203.81	0.9583425	203.81	1.012771	203.81	0.949138	203.81	0.9298842	203.81	0.9701458	203.81	0.05330317	203.8	-0.08803556	203.8	-0.1087728	203.8	-0.09714728	203.8	-0.1047777	203.8	-0.0796241	203.8	-0.07912226	203.8	-0.06891325	203.8	-0.04741872
204.01	0.877146	204.01	0.921067	204.01	0.9622809	204.01	1.017395	204.01	0.9497201	204.01	0.9210089	204.01	0.9664858	204.01	0.05507368	204	-0.08183623	204	-0.1115309	204	-0.09054841	204	-0.1084619	204	-0.07703763	204	-0.08047349	204	-0.07063003	204	-0.04535914
204.21	0.8756498	204.21	0.9205378	204.21	0.9610986	204.21	1.014292	204.21	0.9508759	204.21	0.9315047	204.21	0.970009	204.21	0.05166498	204.2	-0.0873888	204.2	-0.1146336	204.2	-0.09559116	204.2	-0.1031224	204.2	-0.0818034	204.2	-0.07836509	204.2	-0.07258364	204.2	-0.04561174
204.41	0.8786069	204.41	0.9204862	204.41	0.9719916	204.41	1.020398	204.41	0.9515237	204.41	0.9298186	204.41	0.9700159	204.41	0.05699068	204.4	-0.08160605	204.4	-0.1110639	204.4	-0.09705731	204.4	-0.100237	204.4	-0.07915309	204.4	-0.07692994	204.4	-0.07019399	204.4	-0.04000841
204.61	0.878311	204.61	0.9164608	204.61	0.9731572	204.61	1.020582	204.61	0.9585707	204.61	0.9324768	204.61	0.9715218	204.61	0.05702654	204.6	-0.08390307	204.6	-0.1099337	204.6	-0.1005999	204.6	-0.1053437	204.6	-0.0752216	204.6	-0.07927472	204.6	-0.06738552	204.6	-0.04478885
204.81	0.8772491	204.81	0.9275319	204.81	0.9681687	204.81	1.022043	204.81	0.9613943	204.81	0.9368313	204.81	0.977146	204.81	0.05131011	204.8	-0.08347263	204.8	-0.110827	204.8	-0.09888047	204.8	-0.1025286	204.8	-0.07351751	204.8	-0.07733259	204.8	-0.07014564	204.8	-0.04542249
205.01	0.8846018	205.01	0.9315714	205.01	0.9727979	205.01	1.02263	205.01	0.9666427	205.01	0.938531	205.01	0.9802957	205.01	0.05240857	205	-0.08120254	205	-0.1105185	205	-0.098761	205	-0.1016319	205	-0.07702281	205	-0.0759779	205	-0.0700659	205	-0.04340546
205.21	0.8860747	205.21	0.9304499	205.21	0.9743186	205.21	1.020521	205.21	0.9606555	205.21	0.9396235	205.21	0.9772751	205.21	0.05862214	205.2	-0.08253004	205.2	-0.1137989	205.2	-0.09308088	205.2	-0.1034948	205.2	-0.07685299	205.2	-0.07646357	205.2	-0.07052783	205.2	-0.04260264
205.41	0.8861279	205.41	0.9320776	205.41	0.9744899	205.41	1.025584	205.41	0.9635286	205.41	0.9407557	205.41	0.9807176	205.41	0.05333711	205.4	-0.08347177	205.4	-0.1082955	205.4	-0.09440799	205.4	-0.1004402	205.4	-0.07804748	205.4	-0.07987361	205.4	-0.07128639	205.4	-0.03491254
205.61	0.8916597	205.61	0.9315853	205.61	0.9759923	205.61	1.025073	205.61	0.9644447	205.61	0.9426013	205.61	0.9815429	205.61	0.0542523	205.6	-0.08295565	205.6	-0.1101807	205.6	-0.09464038	205.6	-0.0998396	205.6	-0.07561177	205.6	-0.07638216	205.6	-0.06972665	205.6	-0.04123556
205.81	0.8898664	205.81	0.9370247	205.81	0.9773787	205.81	1.027979	205.81	0.9711599	205.81	0.9442712	205.81	0.9814441	205.81	0.0540222	205.8	-0.08121591	205.8	-0.1084611	205.8	-0.09467185	205.8	-0.1055998	205.8	-0.07714775	205.8	-0.0777543	205.8	-0.07379496	205.8	-0.04188263
206.01	0.8929923	206.01	0.9319779	206.01	0.9843709	206.01	1.033428	206.01	0.9707841	206.01	0.9443681	206.01	0.9859109	206.01	0.05636045	206	-0.08411554	206	-0.1041142	206	-0.0955795	206	-0.1036328	206	-0.07453661	206	-0.07224216	206	-0.07453438	206	-0.0409271
206.21	0.8882765	206.21	0.9383073	206.21	0.98153	206.21	1.033468	206.21	0.9733297	206.21	0.9427804	206.21	0.9859874	206.21	0.05355821	206.2	-0.08231634	206.2	-0.1079622	206.2	-0.1000697	206.2	-0.1027841	206.2	-0.07619087	206.2	-0.07848036	206.2	-0.06952376	206.2	-0.04402721
206.41	0.8989671	206.41	0.9423168	206.41	0.981375	206.41	1.035146	206.41	0.9729615	206.41	0.9496866	206.41	0.9886938	206.41	0.05712494	206.4	-0.08139689	206.4	-0.1082976	206.4	-0.09625709	206.4	-0.09678677	206.4	-0.07549991	206.4	-0.07581963	206.4	-0.07224651	206.4	-0.04173432
206.61	0.898405	206.61	0.9454964	206.61	0.9850225	206.61	1.035441	206.61	0.9702648	206.61	0.9454662	206.61	0.9945654	206.61	0.05053512	206.6	-0.08492862	206.6	-0.106332	206.6	-0.0993073	206.6	-0.1019327	206.6	-0.07314423	206.6	-0.07733113	206.6	-0.07590584	206.6	-0.04254928
206.81	0.8967412	206.81	0.9442323	206.81	0.9904568	206.81	1.042154	206.81	0.9779636	206.81	0.9524422	206.81	0.993821	206.81	0.05527787	206.8	-0.07874116	206.8	-0.107877	206.8	-0.097092	206.8	-0.1034879	206.8	-0.07494572	206.8	-0.07628311	206.8	-0.07217281	206.8	-0.03899548
207.01	0.8995593	207.01	0.9453828	207.01	0.9884391	207.01	1.042123	207.01	0.9774192	207.01	0.9531466	207.01	0.9933671	207.01	0.06251275	207	-0.07857167	207	-0.1078276	207	-0.09354846	207	-0.1018899	207	-0.0731439	207	-0.07355716	207	-0.06475636	207	-0.0428957
207.21	0.9038317	207.21	0.9455034	207.21	0.9918237	207.21	1.039996	207.21	0.9788352	207.21	0.9541278	207.21	0.9961361	207.21	0.05755552	207.2	-0.08574054	207.2	-0.1049012	207.2	-0.09974083	207.2	-0.1043275	207.2	-0.07755653	207.2	-0.07319949	207.2	-0.06519122	207.2	-0.03919433
207.41	0.9048658	207.41	0.9496903	207.41	0.9913149	207.41	1.04376	207.41	0.9768034	207.41	0.9562167	207.41	0.9980956	207.41	0.05644833	207.4	-0.08163725	207.4	-0.1106539	207.4	-0.0972809	207.4	-0.1025118	207.4	-0.07453804	207.4	-0.07506593	207.4	-0.06626958	207.4	-0.04506879
207.61	0.9008282	207.61	0.9474314	207.61	0.9930504	207.61	1.045802	207.61	0.9815615	207.61	0.9592865	207.61	1.002224	207.61	0.05346849	207.6	-0.08102166	207.6	-0.1115702	207.6	-0.09803232	207.6	-0.1028993	207.6	-0.07352963	207.6	-0.07559787	207.6	-0.06817319	207.6	-0.03881309
207.81	0.9084126	207.81	0.9513252	207.81	0.9928603	207.81	1.041023	207.81	0.9837036	207.81	0.9569622	207.81	0.9975762	207.81	0.05627878	207.8	-0.07664066	207.8	-0.1144576	207.8	-0.09532899	207.8	-0.09940775	207.8	-0.07513341	207.8	-0.07705744	207.8	-0.06486603	207.8	-0.04333488
208.01	0.9073735	208.01	0.9542653	208.01	0.9990907	208.01	1.047004	208.01	0.9880015	208.01	0.9631554	208.01	1.002526	208.01	0.06183609	208	-0.08348716	208	-0.1079565	208	-0.0942547	208	-0.09753986	208	-0.07391944	208	-0.07710627	208	-0.06602532	208	-0.04070655
208.21	0.9112485	208.21	0.9550387	208.21	0.9965184	208.21	1.052846	208.21	0.9859757	208.21	0.9665396	208.21	1.002763	208.21	0.0555753	208.2	-0.08566304	208.2	-0.1081658	208.2	-0.09216867	208.2	-0.09660156	208.2	-0.07591957	208.2	-0.07335471	208.2	-0.06877086	208.2	-0.04295892
208.41	0.9082964	208.41	0.9565696	208.41	1.001819	208.41	1.050314	208.41	0.9856883	208.41	0.9649754	208.41	1.007658	208.41	0.06192358	208.4	-0.07685596	208.4	-0.1056875	208.4	-0.09204969	208.4	-0.1001664	208.4	-0.07393596	208.4	-0.07269016	208.4	-0.06783507	208.4	-0.03934569
208.61	0.9133593	208.61	0.9546153	208.61	1.00119	208.61	1.054584	208.61	0.9875336	208.61	0.9653359	208.61	1.007683	208.61	0.05622091	208.6	-0.08052569	208.6	-0.1063088	208.6	-0.09764191	208.6	-0.09616562	208.6	-0.07603087	208.6	-0.07675447	208.6	-0.07156573	208.6	-0.04073662
208.81	0.914053	208.81	0.9586034	208.81	1.002788	208.81	1.054051	208.81	0.9910774	208.81	0.9661312	208.81	1.006044	208.81	0.05686597	208.8	-0.07991484	208.8	-0.1088446	208.8	-0.09464838	208.8	-0.09786337	208.8	-0.07401507	208.8	-0.073464	208.8	-0.06576239	208.8	-0.03806598
209.01	0.9180466	209.01	0.9653078	209.01	1.005219	209.01	1.051782	209.01	0.9950935	209.01	0.9679203	209.01	1.009708	209.01	0.06050423	209	-0.08031531	209	-0.1089591	209	-0.09759249	209	-0.09564767	209	-0.07516808	209	-0.0745017	209	-0.06980956	209	-0.03819142
209.21	0.9140821	209.21	0.9627669	209.21	1.003256	209.21	1.059341	209.21	0.99346	209.21	0.9693387	209.21	1.011693	209.21	0.057893	209.2	-0.07793511	209.2	-0.1113146	209.2	-0.09517172	209.2	-0.1070124	209.2	-0.07186925	209.2	-0.07966234	209.2	-0.06561696	209.2	-0.04356436
209.41	0.917312	209.41	0.9628637	209.41	1.006562	209.41	1.060321	209.41	0.9979009	209.41	0.9689868	209.41	1.015269	209.41	0.05944945	209.4	-0.07998937	209.4	-0.1096622	209.4	-0.09104865	209.4	-0.1016208	209.4	-0.07604374	209.4	-0.07826491	209.4	-0.06669052	209.4	-0.0392191
209.61	0.9211237	209.61	0.9661543	209.61	1.008206	209.61	1.059221	209.61	0.997605	209.61	0.9721779	209.61	1.01768	209.61	0.0599926	209.6	-0.07939696	209.6	-0.1075171	209.6	-0.09337056	209.6	-0.09736659	209.6	-0.07436296	209.6	-0.07500903	209.6	-0.06914427	209.6	-0.04294925
209.81	0.9219092	209.81	0.9623803	209.81	1.010264	209.81	1.066323	209.81	0.9991316	209.81	0.9792513	209.81	1.015447	209.81	0.06444257	209.81	-0.08017053	209.81	-0.1090243	209.81	-0.09770723	209.81	-0.09836712	209.81	-0.07005652	209.81	-0.0761568	209.81	-0.07351477	209.81	-0.04423618
210.01	0.9232031	210.01	0.9690934	210.01	1.012293	210.01	1.05945	210.01	1.003295	210.01	0.9758524	210.01	1.018882	210.01	0.05847535	210	-0.07464692	210	-0.1092607	210	-0.0948124	210	-0.101655	210	-0.07439686	210	-0.07487256	210	-0.06942269	210	-0.0370172
210.21	0.9240707	210.21	0.9743494	210.21	1.013	210.21	1.062069	210.21	1.004429	210.21	0.9780312	210.21	1.022864	210.21	0.05993501	210.2	-0.08162922	210.2	-0.1065495	210.2	-0.09322747	210.2	-0.09845009	210.2	-0.07438081	210.2	-0.07437193	210.2	-0.06863721	210.2	-0.03627994
210.41	0.9233282	210.41	0.9675111	210.41	1.0157	210.41	1.068006	210.41	1.00458	210.41	0.9773364	210.41	1.018461	210.41	0.06067745	210.4	-0.08379236	210.4	-0.1032839	210.4	-0.09404627	210.4	-0.09901785	210.4	-0.07425456	210.4	-0.07461064	210.4	-0.06559359	210.4	-0.04246055
210.61	0.925355	210.61	0.9726841	210.61	1.017793	210.61	1.065572	210.61	1.003682	210.61	0.9815934	210.61	1.02698	210.61	0.06001543	210.6	-0.08255354	210.6	-0.1078413	210.6	-0.09587473	210.6	-0.1032604	210.6	-0.08038538	210.6	-0.07293106	210.6	-0.06640068	210.6	-0.04317954
210.81	0.9263756	210.81	0.9738873	210.81	1.017916	210.81	1.069341	210.81	1.005881	210.81	0.9821434	210.81	1.028221	210.81	0.05427062	210.8	-0.08061825	210.8	-0.1098709	210.8	-0.09574438	210.8	-0.1029287	210.8	-0.07294175	210.8	-0.07465488	210.8	-0.06274269	210.8	-0.04126345
211.01	0.9339588	211.01	0.9791449	211.01	1.022685	211.01	1.070192	211.01	1.008755	211.01	0.9851273	211.01	1.02359	211.01	0.06366543	211	-0.08007059	211	-0.104223	211	-0.09512761	211	-0.09002655	211	-0.07105704	211	-0.07575899	211	-0.06979678	211	-0.03790936
211.21	0.9301758	211.21	0.9788105	211.21	1.025962	211.21	1.074905	211.21	1.007743	211.21	0.9823644	211.21	1.024738	211.21	0.05694459	211.2	-0.08375014	211.2	-0.1079776	211.2	-0.09284693	211.2	-0.1020897	211.2	-0.06828866	211.2	-0.07244038	211.2	-0.06940738	211.2	-0.03730156
211.41	0.9314204	211.41	0.9788661	211.41	1.020327	211.41	1.073854	211.41	1.011142	211.41	0.984269	211.41	1.028558	211.41	0.06116605	211.4	-0.07809982	211.4	-0.1089092	211.4	-0.0925576	211.4	-0.09753548	211.4	-0.07010749	211.4	-0.0779658	211.4	-0.06784171	211.4	-0.03864928
211.61	0.9342989	211.61	0.9764076	211.61	1.023233	211.61	1.078766	211.61	1.012793	211.61	0.9859061	211.61	1.035467	211.61	0.06620361	211.6	-0.08050057	211.6	-0.1076699	211.6	-0.09224924	211.6	-0.1018098	211.6	-0.06906413	211.6	-0.07367814	211.6	-0.06605029	211.6	-0.0383616
211.81	0.9372472	211.81	0.9825813	211.81	1.024909	211.81	1.076014	211.81	1.010754	211.81	0.9928252	211.81	1.032554	211.81	0.05884567	211.8	-0.0769354	211.8	-0.1097279	211.8	-0.0959767	211.8	-0.09757828	211.8	-0.07321683	211.8	-0.0753739	211.8	-0.06348806	211.8	-0.03911829
212.01	0.9359036	212.01	0.9864181	212.01	1.026937	212.01	1.077462	212.01	1.012839	212.01	0.9903661	212.01	1.034685	212.01	0.06216354	212	-0.08002135	212	-0.1119666	212	-0.09199676	212	-0.09431926	212	-0.07259113	212	-0.07476498	212	-0.06949052	212	-0.04067454
212.21	0.9381834	212.21	0.9850889	212.21	1.027241	212.21	1.079828	212.21	1.018539	212.21	0.9915992	212.21	1.036226	212.21	0.0642193	212.2	-0.07735305	212.2	-0.1101481	212.2	-0.09273678	212.2	-0.09703758	212.2	-0.07344203	212.2	-0.07395297	212.2	-0.06291918	212.2	-0.04227824
212.41	0.9422814	212.41	0.9916363	212.41	1.02918	212.41	1.081995	212.41	1.018238	212.41	0.9935485	212.41	1.040253	212.41	0.06469552	212.4	-0.08104926	212.4	-0.1073894	212.4	-0.09153803	212.4	-0.09925357	212.4	-0.06971711	212.4	-0.07433572	212.4	-0.06231412	212.4	-0.03847906
212.61	0.9381936	212.61	0.9876126	212.61	1.034277	212.61	1.080239	212.61	1.016393	212.61	0.99807	212.61	1.04414	212.61	0.06396054	212.6	-0.07786216	212.6	-0.1078745	212.6	-0.09797043	212.6	-0.09670627	212.6	-0.07635705	212.6	-0.07555013	212.6	-0.0711512	212.6	-0.0417478
212.81	0.9426802	212.81	0.9890013	212.81	1.031829	212.81	1.087482	212.81	1.020121	212.81	0.9966619	212.81	1.038923	212.81	0.06400912	212.8	-0.07861789	212.8	-0.1050369	212.8	-0.09207777	212.8	-0.1009322	212.8	-0.07772548	212.8	-0.07151294	212.8	-0.06645021	212.8	-0.03752317
213.01	0.9434391	213.01	0.990951	213.01	1.037788	213.01	1.086197	213.01	1.022748	213.01	0.994101	213.01	1.042686	213.01	0.05918539	213	-0.07581653	213	-0.1085694	213	-0.09527539	213	-0.09980025	213	-0.07583904	213	-0.0754682	213	-0.06763396	213	-0.04196083
213.21	0.9434537	213.21	0.9966451	213.21	1.036645	213.21	1.089615	213.21	1.021335	213.21	0.9999335	213.21	1.045408	213.21	0.06081184	213.2	-0.08252788	213.2	-0.1104279	213.2	-0.09466766	213.2	-0.09812553	213.2	-0.07047219	213.2	-0.07289577	213.2	-0.06684641	213.2	-0.04062685
213.41	0.9452205	213.41	0.9949042	213.41	1.038265	213.41	1.0867	213.41	1.024343	213.41	1.000828	213.41	1.045943	213.41	0.06209573	213.4	-0.07835229	213.4	-0.1026873	213.4	-0.09253465	213.4	-0.1055569	213.4	-0.07238669	213.4	-0.07403367	213.4	-0.06393796	213.4	-0.03795348
213.61	0.9503153	213.61	0.9955689	213.61	1.043528	213.61	1.089169	213.61	1.026602	213.61	1.004916	213.61	1.04773	213.61	0.06008973	213.6	-0.07377236	213.6	-0.1000306	213.6	-0.09071366	213.6	-0.09665444	213.6	-0.06820133	213.6	-0.07183766	213.6	-0.06576575	213.6	-0.04073262
213.81	0.947445	213.81	0.9968125	213.81	1.037825	213.81	1.087557	213.81	1.031286	213.81	1.001395	213.81	1.049476	213.81	0.06234926	213.8	-0.07661883	213.8	-0.104989	213.8	-0.09428139	213.8	-0.09400574	213.8	-0.0730458	213.8	-0.0754996	213.8	-0.06781416	213.8	-0.03880203
214.01	0.949169	214.01	0.999027	214.01	1.040957	214.01	1.09775	214.01	1.028167	214.01	1.00472	214.01	1.04785	214.01	0.06322917	214	-0.07772639	214	-0.1052037	214	-0.0876298	214	-0.0952784	214	-0.0742391	214	-0.07044599	214	-0.06342372	214	-0.03752718
214.21	0.9514745	214.21	0.9989094	214.21	1.044065	214.21	1.095159	214.21	1.027547	214.21	1.006429	214.21	1.052289	214.21	0.06136819	214.2	-0.07940583	214.2	-0.1039732	214.2	-0.08873651	214.2	-0.100964	214.2	-0.07440776	214.2	-0.07461207	214.2	-0.06470525	214.2	-0.03421198
214.41	0.9537826	214.41	1.000694	214.41	1.050052	214.41	1.096345	214.41	1.032509	214.41	1.006211	214.41	1.051625	214.41	0.05863762	214.4	-0.07858855	214.4	-0.1074762	214.4	-0.09239602	214.4	-0.0997077	214.4	-0.07196651	214.4	-0.07347286	214.4	-0.0651258	214.4	-0.03903731
214.62	0.955568	214.62	1.006822	214.62	1.04458	214.62	1.099893	214.62	1.031767	214.62	1.01238	214.62	1.056695	214.62	0.06222547	214.6	-0.08059387	214.6	-0.1033791	214.6	-0.08958831	214.6	-0.09949985	214.6	-0.06868765	214.6	-0.07339884	214.6	-0.06462456	214.6	-0.0357409
214.81	0.9602221	214.81	1.008225	214.81	1.0442	214.81	1.102105	214.81	1.034587	214.81	1.008861	214.81	1.052293	214.81	0.06099103	214.8	-0.07775236	214.8	-0.1059945	214.8	-0.09196313	214.8	-0.09594255	214.8	-0.07034932	214.8	-0.07831512	214.8	-0.06808922	214.8	-0.04148525
215.01	0.9602199	215.01	1.005601	215.01	1.048389	215.01	1.096021	215.01	1.032885	215.01	1.009634	215.01	1.059452	215.01	0.06216459	215	-0.07658289	215	-0.1061887	215	-0.09121212	215	-0.1011544	215	-0.07294761	215	-0.07703494	215	-0.06899121	215	-0.03508752
215.21	0.9616049	215.21	1.008963	215.21	1.052996	215.21	1.100287	215.21	1.035255	215.21	1.01178	215.21	1.055809	215.21	0.05986408	215.2	-0.07299837	215.2	-0.1081842	215.2	-0.09142805	215.2	-0.09934048	215.2	-0.07394183	215.2	-0.07767007	215.2	-0.06773424	215.2	-0.04068978
215.41	0.9608873	215.41	1.01158	215.41	1.055205	215.41	1.101832	215.41	1.039175	215.41	1.012373	215.41	1.058115	215.41	0.06471679	215.4	-0.07859346	215.4	-0.1075677	215.4	-0.0880717	215.4	-0.09743919	215.4	-0.06991157	215.4	-0.07372934	215.4	-0.06233725	215.4	-0.0409277
215.61	0.9636571	215.61	1.011913	215.61	1.053248	215.61	1.105096	215.61	1.044828	215.61	1.016915	215.61	1.059825	215.61	0.06170187	215.6	-0.07358634	215.6	-0.1057	215.6	-0.08719796	215.6	-0.09422596	215.6	-0.06815912	215.6	-0.06993616	215.6	-0.06713834	215.6	-0.03721524
215.81	0.9643998	215.81	1.00895	215.81	1.055097	215.81	1.105373	215.81	1.040244	215.81	1.01944	215.81	1.061897	215.81	0.06031872	215.8	-0.07237342	215.8	-0.1048473	215.8	-0.09123298	215.8	-0.1011592	215.8	-0.06944393	215.8	-0.07227033	215.8	-0.06416997	215.8	-0.04122625
216.01	0.9612815	216.01	1.012542	216.01	1.059171	216.01	1.105385	216.01	1.040225	216.01	1.020832	216.01	1.065002	216.01	0.06421056	216	-0.07400778	216	-0.1070583	216	-0.09314097	216	-0.09328135	216	-0.07447778	216	-0.0741322	216	-0.06569413	216	-0.04164988
216.21	0.9673076	216.21	1.010698	216.21	1.058719	216.21	1.111519	216.21	1.044424	216.21	1.018046	216.21	1.061388	216.21	0.06301917	216.2	-0.07843921	216.2	-0.1056215	216.2	-0.08941074	216.2	-0.09668954	216.2	-0.07098491	216.2	-0.07440836	216.2	-0.06366504	216.2	-0.03484578
216.41	0.9681246	216.41	1.015061	216.41	1.060571	216.41	1.112182	216.41	1.047008	216.41	1.019633	216.41	1.065582	216.41	0.05932474	216.4	-0.08092823	216.4	-0.1058548	216.4	-0.08653665	216.4	-0.09687153	216.4	-0.073222	216.4	-0.07425866	216.4	-0.06857824	216.4	-0.03824534
216.61	0.9663691	216.61	1.016784	216.61	1.058946	216.61	1.10998	216.61	1.046894	216.61	1.023111	216.61	1.06504	216.61	0.0627299	216.6	-0.07818346	216.6	-0.1059564	216.6	-0.09401048	216.6	-0.09417948	216.6	-0.06926651	216.6	-0.07502624	216.6	-0.06929345	216.6	-0.03573714
216.81	0.9653648	216.81	1.020322	216.81	1.05911	216.81	1.111763	216.81	1.044986	216.81	1.019326	216.81	1.071778	216.81	0.06518676	216.8	-0.07556006	216.8	-0.1018421	216.8	-0.09233193	216.8	-0.09700296	216.8	-0.06728386	216.8	-0.07097898	216.8	-0.06268716	216.8	-0.03291178
217.01	0.9755127	217.01	1.02187	217.01	1.063534	217.01	1.112063	217.01	1.047281	217.01	1.02595	217.01	1.075012	217.01	0.06212071	217	-0.07407144	217	-0.1030969	217	-0.08814032	217	-0.09828005	217	-0.06907086	217	-0.07243588	217	-0.0682097	217	-0.04041908
217.21	0.9710018	217.21	1.022266	217.21	1.065044	217.21	1.110994	217.21	1.051308	217.21	1.025693	217.21	1.075572	217.21	0.06368474	217.2	-0.07699543	217.2	-0.1096908	217.2	-0.09292325	217.2	-0.09736815	217.2	-0.06788694	217.2	-0.07276236	217.2	-0.0686728	217.2	-0.03850765
217.41	0.9732419	217.41	1.019443	217.41	1.063696	217.41	1.121426	217.41	1.051828	217.41	1.023409	217.41	1.072967	217.41	0.06553341	217.4	-0.07439069	217.4	-0.105337	217.4	-0.09155278	217.4	-0.0978233	217.4	-0.07763866	217.4	-0.0697849	217.4	-0.0594782	217.4	-0.03809755
217.61	0.9751903	217.61	1.021612	217.61	1.068711	217.61	1.116859	217.61	1.053589	217.61	1.02663	217.61	1.078754	217.61	0.06476701	217.6	-0.07587829	217.6	-0.1044464	217.6	-0.08814677	217.6	-0.09455197	217.6	-0.07220171	217.6	-0.07181644	217.6	-0.0693882	217.6	-0.04120585
217.81	0.976436	217.81	1.023413	217.81	1.066707	217.81	1.116125	217.81	1.055896	217.81	1.025964	217.81	1.07926	217.81	0.06002113	217.8	-0.0787333	217.8	-0.1069905	217.8	-0.09589034	217.8	-0.09970909	217.8	-0.07190219	217.8	-0.07181811	217.8	-0.06219516	217.8	-0.03867418
218.01	0.9770379	218.01	1.026237	218.01	1.070394	218.01	1.120404	218.01	1.054806	218.01	1.030149	218.01	1.075784	218.01	0.06619483	218	-0.07687979	218	-0.1003316	218	-0.08968426	218	-0.09729976	218	-0.06930476	218	-0.06769786	218	-0.06636295	218	-0.04088416
218.21	0.9794334	218.21	1.025952	218.21	1.067797	218.21	1.12031	218.21	1.05611	218.21	1.030754	218.21	1.079238	218.21	0.06357097	218.2	-0.07880171	218.2	-0.1021488	218.2	-0.09024378	218.2	-0.0944421	218.2	-0.07102735	218.2	-0.0709429	218.2	-0.0635592	218.2	-0.04016606
218.41	0.9773074	218.41	1.027756	218.41	1.068197	218.41	1.12043	218.41	1.058203	218.41	1.038969	218.41	1.07984	218.41	0.06706246	218.4	-0.07631961	218.4	-0.09831697	218.4	-0.0913708	218.4	-0.09467725	218.4	-0.07031444	218.4	-0.07235983	218.4	-0.06624027	218.4	-0.03603883
218.61	0.9801022	218.61	1.029526	218.61	1.072991	218.61	1.122255	218.61	1.057707	218.61	1.031502	218.61	1.083884	218.61	0.06267688	218.6	-0.08103871	218.6	-0.1082973	218.6	-0.09348134	218.6	-0.09500949	218.6	-0.07055574	218.6	-0.07375944	218.6	-0.06584809	218.6	-0.04275525
218.81	0.9835048	218.81	1.027394	218.81	1.073941	218.81	1.124776	218.81	1.056947	218.81	1.037209	218.81	1.082469	218.81	0.06256237	218.8	-0.07670936	218.8	-0.1070857	218.8	-0.09318897	218.8	-0.09814251	218.8	-0.06910227	218.8	-0.07419016	218.8	-0.06756375	218.8	-0.04204129
219.01	0.9824811	219.01	1.032195	219.01	1.07461	219.01	1.126519	219.01	1.05633	219.01	1.036394	219.01	1.086745	219.01	0.06044479	219	-0.0747534	219	-0.1071675	219	-0.08876998	219	-0.0996426	219	-0.07165398	219	-0.07273038	219	-0.0680087	219	-0.03460401
219.21	0.9835367	219.21	1.030118	219.21	1.078232	219.21	1.127348	219.21	1.057803	219.21	1.045724	219.21	1.086582	219.21	0.0666693	219.2	-0.07848828	219.2	-0.1043439	219.2	-0.09220491	219.2	-0.09457866	219.2	-0.07032157	219.2	-0.07318884	219.2	-0.0676718	219.2	-0.03674044
219.41	0.9873064	219.41	1.030016	219.41	1.075966	219.41	1.125724	219.41	1.063327	219.41	1.039222	219.41	1.0843	219.41	0.06313618	219.4	-0.07961873	219.4	-0.1061493	219.4	-0.09165638	219.4	-0.09633566	219.4	-0.06639103	219.4	-0.07594842	219.4	-0.06513777	219.4	-0.03553727
219.61	0.9834366	219.61	1.040471	219.61	1.07636	219.61	1.12688	219.61	1.064669	219.61	1.04246	219.61	1.089109	219.61	0.06387566	219.61	-0.07762268	219.61	-0.1020359	219.61	-0.08976712	219.61	-0.09619336	219.61	-0.06821132	219.61	-0.07045384	219.61	-0.06509221	219.61	-0.03744414
219.81	0.9829438	219.81	1.039382	219.81	1.079524	219.81	1.122369	219.81	1.063383	219.81	1.044764	219.81	1.091682	219.81	0.06429401	219.8	-0.07398364	219.8	-0.1023035	219.8	-0.08908034	219.8	-0.09593602	219.8	-0.07167666	219.8	-0.07129008	219.8	-0.06268745	219.8	-0.03704253
220.01	0.9919436	220.01	1.039024	220.01	1.083112	220.01	1.12972	220.01	1.064528	220.01	1.044193	220.01	1.094672	220.01	0.06638803	220	-0.07199042	220	-0.1064522	220	-0.08988126	220	-0.09856193	220	-0.07245168	220	-0.06882042	220	-0.06004518	220	-0.03657831
220.21	0.9857976	220.21	1.039227	220.21	1.080539	220.21	1.129024	220.21	1.061936	220.21	1.040733	220.21	1.094541	220.21	0.06081527	220.2	-0.07742827	220.2	-0.1023649	220.2	-0.09280462	220.2	-0.0964858	220.2	-0.06861244	220.2	-0.07088146	220.2	-0.06135442	220.2	-0.03501365
220.41	0.9936471	220.41	1.036321	220.41	1.084771	220.41	1.132424	220.41	1.070601	220.41	1.043531	220.41	1.093557	220.41	0.06514326	220.4	-0.07597596	220.4	-0.1068222	220.4	-0.09022807	220.4	-0.09624004	220.4	-0.06948189	220.4	-0.0691485	220.4	-0.06604818	220.4	-0.0377676
220.61	0.9908783	220.61	1.039993	220.61	1.082602	220.61	1.13865	220.61	1.073011	220.61	1.050662	220.61	1.098067	220.61	0.06414369	220.6	-0.07435489	220.6	-0.1080358	220.6	-0.09055624	220.6	-0.09971313	220.6	-0.06721849	220.6	-0.07093466	220.6	-0.06497149	220.6	-0.0336219
220.81	0.992819	220.81	1.043844	220.81	1.088479	220.81	1.139724	220.81	1.072551	220.81	1.046465	220.81	1.097916	220.81	0.06412858	220.8	-0.07653758	220.8	-0.1043211	220.8	-0.09244648	220.8	-0.09208701	220.8	-0.06919395	220.8	-0.07366957	220.8	-0.06551161	220.8	-0.03930133
221.01	0.9924443	221.01	1.044048	221.01	1.086961	221.01	1.138106	221.01	1.071571	221.01	1.047137	221.01	1.098638	221.01	0.06435061	221	-0.07662084	221	-0.1001988	221	-0.09422588	221	-0.09543125	221	-0.06616452	221	-0.0720656	221	-0.06891315	221	-0.03783544
221.21	0.9953868	221.21	1.046805	221.21	1.090245	221.21	1.141973	221.21	1.068775	221.21	1.051262	221.21	1.099784	221.21	0.06675287	221.2	-0.07940955	221.2	-0.1036124	221.2	-0.08823121	221.2	-0.09242921	221.2	-0.07071083	221.2	-0.06907951	221.2	-0.06580208	221.2	-0.03822819
221.41	0.9993113	221.41	1.046842	221.41	1.0881	221.41	1.140306	221.41	1.078937	221.41	1.05459	221.41	1.102119	221.41	0.06625993	221.4	-0.07394383	221.4	-0.1066298	221.4	-0.08672722	221.4	-0.08880888	221.4	-0.06712127	221.4	-0.07306539	221.4	-0.0630037	221.4	-0.0367527
221.61	0.9968281	221.61	1.044783	221.61	1.087356	221.61	1.140952	221.61	1.078703	221.61	1.052008	221.61	1.100675	221.61	0.06756271	221.6	-0.07514336	221.6	-0.1005967	221.6	-0.09407637	221.6	-0.09795832	221.6	-0.06515944	221.6	-0.07144481	221.6	-0.05992551	221.6	-0.03332695
221.81	0.9980075	221.81	1.050723	221.81	1.093167	221.81	1.144908	221.81	1.08071	221.81	1.055302	221.81	1.104841	221.81	0.06560873	221.8	-0.0751721	221.8	-0.1048993	221.8	-0.09246266	221.8	-0.1003285	221.8	-0.07038414	221.8	-0.06867546	221.8	-0.06569824	221.8	-0.03770668
222.01	0.9980922	222.01	1.054287	222.01	1.094901	222.01	1.146789	222.01	1.079955	222.01	1.055739	222.01	1.103845	222.01	0.0635687	222	-0.07287598	222	-0.10071	222	-0.08365591	222	-0.09309503	222	-0.0679811	222	-0.0677832	222	-0.06109437	222	-0.0387989
222.21	1.004517	222.21	1.051891	222.21	1.094556	222.21	1.144899	222.21	1.078302	222.21	1.058369	222.21	1.107343	222.21	0.06670293	222.2	-0.07640602	222.2	-0.1045296	222.2	-0.08851904	222.2	-0.09569389	222.2	-0.07259054	222.2	-0.06792861	222.2	-0.06049823	222.2	-0.03095266
222.42	1.000788	222.42	1.048785	222.42	1.099179	222.42	1.145802	222.42	1.079312	222.42	1.062845	222.42	1.110472	222.42	0.0662123	222.4	-0.07621942	222.4	-0.1057045	222.4	-0.09292432	222.4	-0.09728082	222.4	-0.06610978	222.4	-0.07049585	222.4	-0.06193836	222.4	-0.03424756
222.61	1.003729	222.61	1.051644	222.61	1.098123	222.61	1.14901	222.61	1.080018	222.61	1.058705	222.61	1.104867	222.61	0.06749613	222.6	-0.07635306	222.6	-0.1052817	222.6	-0.09056982	222.6	-0.09544035	222.6	-0.06985978	222.6	-0.07279491	222.6	-0.06076842	222.6	-0.03830424
222.81	1.00335	222.81	1.056291	222.81	1.098066	222.81	1.150717	222.81	1.084069	222.81	1.059425	222.81	1.111198	222.81	0.06363996	222.8	-0.07206661	222.8	-0.09917613	222.8	-0.08785263	222.8	-0.1013194	222.8	-0.06577087	222.8	-0.07271184	222.8	-0.06358496	222.8	-0.03885403
223.01	1.007212	223.01	1.059395	223.01	1.098457	223.01	1.1521	223.01	1.086489	223.01	1.061959	223.01	1.108931	223.01	0.06936242	223	-0.07699722	223	-0.09898205	223	-0.08836699	223	-0.09520043	223	-0.06620106	223	-0.06953771	223	-0.0638581	223	-0.04166491
223.21	1.008779	223.21	1.06359	223.21	1.099593	223.21	1.148086	223.21	1.091262	223.21	1.065535	223.21	1.111339	223.21	0.06427382	223.2	-0.0739014	223.2	-0.1024894	223.2	-0.09028422	223.2	-0.09660017	223.2	-0.06465406	223.2	-0.06922678	223.2	-0.06424826	223.2	-0.03477179
223.41	1.010615	223.41	1.060672	223.41	1.104403	223.41	1.147149	223.41	1.087037	223.41	1.067174	223.41	1.113216	223.41	0.06846411	223.4	-0.073081	223.4	-0.1025407	223.4	-0.08790278	223.4	-0.09168138	223.4	-0.06695578	223.4	-0.06770401	223.4	-0.06160108	223.4	-0.03168335
223.61	1.007195	223.61	1.066817	223.61	1.098262	223.61	1.153265	223.61	1.086908	223.61	1.065187	223.61	1.115282	223.61	0.06820812	223.6	-0.07352147	223.6	-0.1019353	223.6	-0.08863343	223.6	-0.09628449	223.6	-0.06906967	223.6	-0.06885039	223.6	-0.05848083	223.6	-0.03691692
223.81	1.009327	223.81	1.059745	223.81	1.103992	223.81	1.155477	223.81	1.086154	223.81	1.06651	223.81	1.10857	223.81	0.06857559	223.8	-0.07512499	223.8	-0.1041864	223.8	-0.08909745	223.8	-0.09472127	223.8	-0.06842316	223.8	-0.0703337	223.8	-0.06330188	223.8	-0.038167
224.01	1.012346	224.01	1.066371	224.01	1.10383	224.01	1.15757	224.01	1.094239	224.01	1.06779	224.01	1.114406	224.01	0.06349134	224	-0.07588757	224	-0.1026321	224	-0.09139021	224	-0.09662475	224	-0.06897381	224	-0.06764232	224	-0.06110097	224	-0.03668003
224.21	1.01213	224.21	1.067446	224.21	1.11079	224.21	1.154209	224.21	1.089635	224.21	1.069412	224.21	1.116159	224.21	0.06743398	224.2	-0.07489349	224.2	-0.1027953	224.2	-0.09043886	224.2	-0.09725884	224.2	-0.06921247	224.2	-0.06890242	224.2	-0.06180535	224.2	-0.03320128
224.41	1.016645	224.41	1.062719	224.41	1.10533	224.41	1.159171	224.41	1.091317	224.41	1.071234	224.41	1.120773	224.41	0.06375702	224.4	-0.07254612	224.4	-0.1024584	224.4	-0.09098135	224.4	-0.093183	224.4	-0.06516452	224.4	-0.07229836	224.4	-0.06235375	224.4	-0.03736713
224.61	1.014431	224.61	1.069201	224.61	1.11072	224.61	1.162067	224.61	1.096782	224.61	1.071902	224.61	1.114074	224.61	0.06450073	224.6	-0.0732423	224.6	-0.1072661	224.6	-0.09341817	224.6	-0.09519692	224.6	-0.06735903	224.6	-0.06913948	224.6	-0.06609102	224.6	-0.03458226
224.81	1.014936	224.81	1.064556	224.81	1.114054	224.81	1.159293	224.81	1.098028	224.81	1.071778	224.81	1.123152	224.81	0.06906062	224.8	-0.07510454	224.8	-0.100845	224.8	-0.08979493	224.8	-0.09651526	224.8	-0.07083885	224.8	-0.0712003	224.8	-0.06100602	224.8	-0.03883926
225.01	1.014693	225.01	1.065684	225.01	1.109073	225.01	1.162928	225.01	1.097397	225.01	1.077854	225.01	1.121697	225.01	0.06582034	225	-0.07495426	225	-0.1016672	225	-0.08973665	225	-0.09804173	225	-0.06377788	225	-0.06830958	225	-0.0623322	225	-0.03636303
225.21	1.016522	225.21	1.066923	225.21	1.11161	225.21	1.160976	225.21	1.097556	225.21	1.073798	225.21	1.121084	225.21	0.07243031	225.2	-0.07286245	225.2	-0.1030575	225.2	-0.09062988	225.2	-0.09281615	225.2	-0.07033058	225.2	-0.06833019	225.2	-0.06273089	225.2	-0.03677806
225.41	1.016926	225.41	1.070208	225.41	1.112724	225.41	1.15879	225.41	1.098905	225.41	1.075335	225.41	1.123634	225.41	0.06822345	225.4	-0.07316945	225.4	-0.1023115	225.4	-0.08982185	225.4	-0.09302751	225.4	-0.06732995	225.4	-0.07350864	225.4	-0.06599473	225.4	-0.03864715
225.61	1.018587	225.61	1.07136	225.61	1.112329	225.61	1.165737	225.61	1.101176	225.61	1.074416	225.61	1.124652	225.61	0.07418387	225.6	-0.07496729	225.6	-0.1002061	225.6	-0.08649062	225.6	-0.09684565	225.6	-0.06604593	225.6	-0.06692706	225.6	-0.0603519	225.6	-0.03425158
225.81	1.018923	225.81	1.075582	225.81	1.118687	225.81	1.168142	225.81	1.100241	225.81	1.076216	225.81	1.124061	225.81	0.07160242	225.8	-0.07488026	225.8	-0.09643827	225.8	-0.09009798	225.8	-0.09208584	225.8	-0.06870826	225.8	-0.07185483	225.8	-0.06256843	225.8	-0.03658437
226.01	1.027362	226.01	1.070411	226.01	1.119182	226.01	1.167054	226.01	1.102045	226.01	1.077013	226.01	1.125929	226.01	0.06246029	226	-0.0749037	226	-0.1036407	226	-0.08896662	226	-0.09113473	226	-0.06201888	226	-0.06912787	226	-0.06383236	226	-0.03682144
226.21	1.022319	226.21	1.075913	226.21	1.119536	226.21	1.168897	226.21	1.100542	226.21	1.076482	226.21	1.123841	226.21	0.06451803	226.2	-0.07313866	226.2	-0.1004548	226.2	-0.09101529	226.2	-0.09304354	226.2	-0.06348711	226.2	-0.06681097	226.2	-0.06506974	226.2	-0.03763295
226.41	1.024838	226.41	1.080618	226.41	1.11844	226.41	1.170271	226.41	1.101465	226.41	1.08315	226.41	1.133453	226.41	0.06773566	226.4	-0.07269793	226.4	-0.1059388	226.4	-0.09127308	226.4	-0.09021378	226.4	-0.06721921	226.4	-0.0659291	226.4	-0.06121963	226.4	-0.03448048
226.61	1.028985	226.61	1.075783	226.61	1.116477	226.61	1.168928	226.61	1.1052	226.61	1.080118	226.61	1.134566	226.61	0.07180924	226.6	-0.07686305	226.6	-0.1005181	226.6	-0.08879625	226.6	-0.0941271	226.6	-0.06419133	226.6	-0.06805331	226.6	-0.06160396	226.6	-0.04098723
226.81	1.023921	226.81	1.078258	226.81	1.120953	226.81	1.173973	226.81	1.1074	226.81	1.082195	226.81	1.128826	226.81	0.0702441	226.8	-0.07687214	226.8	-0.1036678	226.8	-0.08638132	226.8	-0.09827825	226.8	-0.06785878	226.8	-0.0706527	226.8	-0.05719317	226.8	-0.03803873
227.01	1.028885	227.01	1.080666	227.01	1.121596	227.01	1.173161	227.01	1.102759	227.01	1.085007	227.01	1.13043	227.01	0.06678113	227	-0.07854722	227	-0.1033346	227	-0.09132286	227	-0.09356631	227	-0.06783725	227	-0.06446193	227	-0.0607825	227	-0.04190593
227.21	1.024064	227.21	1.081104	227.21	1.126142	227.21	1.171256	227.21	1.106926	227.21	1.084113	227.21	1.136588	227.21	0.06402487	227.2	-0.07333209	227.2	-0.1050351	227.2	-0.08816694	227.2	-0.09155441	227.2	-0.06679722	227.2	-0.07385886	227.2	-0.06223485	227.2	-0.03440376
227.41	1.027164	227.41	1.087416	227.41	1.125622	227.41	1.175465	227.41	1.109019	227.41	1.085793	227.41	1.136082	227.41	0.07006527	227.4	-0.06786279	227.4	-0.1037735	227.4	-0.08795141	227.4	-0.09422731	227.4	-0.06600183	227.4	-0.06466957	227.4	-0.06341916	227.4	-0.04056381
227.61	1.031382	227.61	1.086154	227.61	1.124681	227.61	1.175134	227.61	1.108886	227.61	1.085022	227.61	1.137674	227.61	0.07116294	227.6	-0.07677969	227.6	-0.09840238	227.6	-0.09220453	227.6	-0.09625123	227.6	-0.06232686	227.6	-0.07270453	227.6	-0.06039244	227.6	-0.03197935
227.81	1.029782	227.81	1.090981	227.81	1.129482	227.81	1.17774	227.81	1.110945	227.81	1.087434	227.81	1.139532	227.81	0.0722299	227.8	-0.07412612	227.8	-0.100899	227.8	-0.08759463	227.8	-0.09586599	227.8	-0.06771407	227.8	-0.06931032	227.8	-0.05625347	227.8	-0.03395944
228.01	1.034995	228.01	1.086287	228.01	1.125184	228.01	1.176031	228.01	1.116525	228.01	1.087766	228.01	1.140772	228.01	0.06888772	228	-0.07016692	228	-0.1009358	228	-0.08604938	228	-0.09671126	228	-0.06537606	228	-0.07079007	228	-0.06134023	228	-0.03541461
228.21	1.036879	228.21	1.089689	228.21	1.130059	228.21	1.182876	228.21	1.111999	228.21	1.088994	228.21	1.142487	228.21	0.070519	228.2	-0.0726231	228.2	-0.09528001	228.2	-0.08945142	228.2	-0.08930293	228.2	-0.06133471	228.2	-0.06839333	228.2	-0.05603365	228.2	-0.03854153
228.41	1.038485	228.41	1.086064	228.41	1.131446	228.41	1.182733	228.41	1.113672	228.41	1.088831	228.41	1.142551	228.41	0.0710841	228.4	-0.07110345	228.4	-0.1008657	228.4	-0.08541184	228.4	-0.09149905	228.4	-0.06189013	228.4	-0.06668974	228.4	-0.06302028	228.4	-0.03287699
228.61	1.034304	228.61	1.089806	228.61	1.131251	228.61	1.179516	228.61	1.116925	228.61	1.09308	228.61	1.140579	228.61	0.06780674	228.6	-0.07431683	228.6	-0.0997872	228.6	-0.08368389	228.6	-0.0933293	228.6	-0.06395268	228.6	-0.06968135	228.6	-0.06454226	228.6	-0.03286643
228.81	1.03805	228.81	1.092598	228.81	1.1327	228.81	1.181552	228.81	1.113512	228.81	1.096495	228.81	1.141336	228.81	0.07082417	228.8	-0.07302306	228.8	-0.1003224	228.8	-0.08881865	228.8	-0.09597508	228.8	-0.06392586	228.8	-0.06804869	228.8	-0.06336934	228.8	-0.03412917
229.01	1.042485	229.01	1.093688	229.01	1.131577	229.01	1.17744	229.01	1.115513	229.01	1.095904	229.01	1.143292	229.01	0.0652753	229	-0.07058362	229	-0.1019446	229	-0.09052001	229	-0.09131163	229	-0.06546883	229	-0.06596147	229	-0.05969946	229	-0.03165609
229.21	1.040882	229.21	1.090945	229.21	1.13431	229.21	1.184279	229.21	1.118964	229.21	1.094345	229.21	1.143378	229.21	0.06951979	229.2	-0.06961223	229.2	-0.101892	229.2	-0.08965506	229.2	-0.09458698	229.2	-0.06742886	229.2	-0.06525267	229.2	-0.05977899	229.2	-0.0363695
229.41	1.042627	229.41	1.094607	229.41	1.134843	229.41	1.18309	229.41	1.117556	229.41	1.098563	229.41	1.148524	229.41	0.0671057	229.4	-0.07338478	229.4	-0.0986656	229.4	-0.09073637	229.4	-0.09557481	229.4	-0.06064652	229.4	-0.07006067	229.4	-0.05993496	229.4	-0.03455514
229.61	1.044693	229.61	1.09392	229.61	1.134682	229.61	1.186538	229.61	1.11877	229.61	1.095942	229.61	1.149878	229.61	0.06749079	229.6	-0.07248565	229.6	-0.1008186	229.6	-0.08998192	229.6	-0.09224769	229.6	-0.06650112	229.6	-0.06803815	229.6	-0.06277358	229.6	-0.03318229
229.81	1.042203	229.81	1.095293	229.81	1.137015	229.81	1.185376	229.81	1.119816	229.81	1.099825	229.81	1.149196	229.81	0.0700994	229.8	-0.073519	229.8	-0.1017328	229.8	-0.08898539	229.8	-0.09241544	229.8	-0.06364186	229.8	-0.0653739	229.8	-0.06045922	229.8	-0.03245905
230.01	1.088613	230.01	1.141436	230.01	1.185309	230.01	1.232063	230.01	1.175363	230.01	1.148568	230.01	1.201425	230.01	0.06838004	230	-0.06901217	230	-0.09709837	230	-0.08636869	230	-0.09395646	230	-0.06466172	230	-0.06440563	230	-0.05800237	230	-0.03297922
230.21	1.089404	230.21	1.145484	230.21	1.193519	230.21	1.239939	230.21	1.177455	230.21	1.155692	230.21	1.203998	230.21	0.0744351	230.2	-0.07338931	230.2	-0.1003192	230.2	-0.08875468	230.2	-0.08921964	230.2	-0.06125349	230.2	-0.06936681	230.2	-0.05897839	230.2	-0.03490699
230.41	1.093323	230.41	1.150006	230.41	1.191059	230.41	1.239877	230.41	1.17759	230.41	1.160264	230.41	1.205485	230.41	0.07449133	230.4	-0.07236357	230.4	-0.09489312	230.4	-0.08555069	230.4	-0.0928256	230.4	-0.06603312	230.4	-0.06958649	230.4	-0.06348861	230.4	-0.03926452
230.61	1.0915	230.61	1.151336	230.61	1.192924	230.61	1.243783	230.61	1.177564	230.61	1.158201	230.61	1.20606	230.61	0.07421043	230.59	-0.07319371	230.59	-0.09737942	230.59	-0.08616117	230.59	-0.08888219	230.59	-0.06132952	230.59	-0.06942504	230.59	-0.05446143	230.59	-0.03362647
230.81	1.09532	230.81	1.152123	230.81	1.192609	230.81	1.243642	230.81	1.184437	230.81	1.157743	230.81	1.210739	230.81	0.0711733	230.8	-0.07300582	230.8	-0.09586746	230.8	-0.08881241	230.8	-0.09032846	230.8	-0.06517965	230.8	-0.0690561	230.8	-0.06040878	230.8	-0.03105837
231.02	1.097869	231.02	1.151582	231.02	1.191353	231.02	1.242493	231.02	1.180106	231.02	1.153949	231.02	1.208187	231.02	0.0767334	231	-0.07246231	231	-0.09690445	231	-0.08041028	231	-0.08955935	231	-0.0640584	231	-0.06970476	231	-0.05951735	231	-0.03111707
231.21	1.100136	231.21	1.158638	231.21	1.190547	231.21	1.244196	231.21	1.1835	231.21	1.15936	231.21	1.211561	231.21	0.07411888	231.2	-0.06731807	231.2	-0.0981625	231.2	-0.08560777	231.2	-0.0895131	231.2	-0.06572866	231.2	-0.06736831	231.2	-0.06328707	231.2	-0.03830075
231.41	1.095258	231.41	1.151179	231.41	1.192361	231.41	1.242977	231.41	1.183165	231.41	1.163112	231.41	1.213846	231.41	0.07477245	231.4	-0.07278944	231.4	-0.09874765	231.4	-0.08460006	231.4	-0.09267361	231.4	-0.06685618	231.4	-0.06481319	231.4	-0.05944036	231.4	-0.03613514
231.61	1.096229	231.61	1.152359	231.61	1.190704	231.61	1.245731	231.61	1.182302	231.61	1.161502	231.61	1.203325	231.61	0.072069	231.6	-0.07352997	231.6	-0.09808138	231.6	-0.08586494	231.6	-0.09682844	231.6	-0.06065964	231.6	-0.06833684	231.6	-0.05837334	231.6	-0.0376948
231.81	1.102663	231.81	1.157139	231.81	1.197325	231.81	1.247956	231.81	1.181926	231.81	1.163645	231.81	1.212759	231.81	0.07553473	231.8	-0.06595274	231.8	-0.09638762	231.8	-0.08998534	231.8	-0.09549476	231.8	-0.06437622	231.8	-0.07037964	231.8	-0.06081819	231.8	-0.0333137
232.01	1.100251	232.01	1.154763	232.01	1.194151	232.01	1.245549	232.01	1.176612	232.01	1.161115	232.01	1.213985	232.01	0.07509773	232	-0.07044175	232	-0.1020484	232	-0.0845395	232	-0.09435478	232	-0.0630254	232	-0.06473627	232	-0.05931488	232	-0.03148606
232.21	1.097703	232.21	1.157995	232.21	1.200288	232.21	1.247817	232.21	1.17968	232.21	1.161328	232.21	1.210224	232.21	0.07653321	232.2	-0.07465217	232.2	-0.1001961	232.2	-0.08526219	232.2	-0.09062825	232.2	-0.06241474	232.2	-0.06371958	232.2	-0.05647221	232.2	-0.03557584
232.41	1.100102	232.41	1.157839	232.41	1.195672	232.41	1.245908	232.41	1.179488	232.41	1.167289	232.41	1.210444	232.41	0.07514213	232.4	-0.07202376	232.4	-0.09288509	232.4	-0.08401832	232.4	-0.0903277	232.4	-0.05966402	232.4	-0.06730016	232.4	-0.06281093	232.4	-0.02851033
232.61	1.09893	232.61	1.153249	232.61	1.197403	232.61	1.24574	232.61	1.18477	232.61	1.165652	232.61	1.210507	232.61	0.07229666	232.59	-0.07427967	232.59	-0.09494033	232.59	-0.08668022	232.59	-0.09367569	232.59	-0.06057258	232.59	-0.06478658	232.59	-0.05750133	232.59	-0.03407824
232.81	1.103485	232.81	1.154866	232.81	1.198559	232.81	1.249003	232.81	1.183928	232.81	1.163907	232.81	1.207739	232.81	0.07619004	232.8	-0.06966604	232.8	-0.09848028	232.8	-0.08510435	232.8	-0.09044355	232.8	-0.06100139	232.8	-0.06473316	232.8	-0.06007371	232.8	-0.03207346
233.01	1.102054	233.01	1.157259	233.01	1.199199	233.01	1.247167	233.01	1.184345	233.01	1.161416	233.01	1.214636	233.01	0.06992377	233	-0.07244006	233	-0.09490522	233	-0.08494291	233	-0.09039369	233	-0.0637534	233	-0.0648429	233	-0.06259871	233	-0.03258319
233.21	1.103226	233.21	1.157828	233.21	1.196859	233.21	1.250962	233.21	1.183805	233.21	1.165429	233.21	1.211088	233.21	0.07461099	233.2	-0.07104367	233.2	-0.100878	233.2	-0.09132656	233.2	-0.09136576	233.2	-0.06092425	233.2	-0.06759024	233.2	-0.05778097	233.2	-0.03279079
233.42	1.104273	233.42	1.157826	233.42	1.197852	233.42	1.246951	233.42	1.177442	233.42	1.161721	233.42	1.2166	233.42	0.07444961	233.4	-0.07380541	233.4	-0.09642397	233.4	-0.08582955	233.4	-0.08745156	233.4	-0.06541568	233.4	-0.066109	233.4	-0.06034154	233.4	-0.03009818
233.62	1.099193	233.62	1.155743	233.62	1.197101	233.62	1.250841	233.62	1.180291	233.62	1.162782	233.62	1.214335	233.62	0.07776239	233.6	-0.07091805	233.6	-0.0985679	233.6	-0.08236818	233.6	-0.08965202	233.6	-0.06458177	233.6	-0.06225529	233.6	-0.05700496	233.6	-0.03547057
233.81	1.096344	233.81	1.154494	233.81	1.192094	233.81	1.250845	233.81	1.186447	233.81	1.166711	233.81	1.217382	233.81	0.07816058	233.8	-0.06865057	233.8	-0.09761792	233.8	-0.08746699	233.8	-0.09159444	233.8	-0.06167747	233.8	-0.0635145	233.8	-0.05567585	233.8	-0.03244002
234.01	1.103017	234.01	1.157069	234.01	1.198621	234.01	1.249676	234.01	1.184876	234.01	1.165406	234.01	1.214814	234.01	0.07992914	233.99	-0.06822541	233.99	-0.09656715	233.99	-0.08796312	233.99	-0.08717012	233.99	-0.06351712	233.99	-0.06710098	233.99	-0.05422453	233.99	-0.03315822
234.21	1.09721	234.21	1.154092	234.21	1.196383	234.21	1.245767	234.21	1.189306	234.21	1.167029	234.21	1.21116	234.21	0.07225819	234.19	-0.06871077	234.19	-0.09721804	234.19	-0.08442742	234.19	-0.08861484	234.19	-0.06349702	234.19	-0.06765752	234.19	-0.06090128	234.19	-0.03503811
234.41	1.102637	234.41	1.153971	234.41	1.197859	234.41	1.246662	234.41	1.183059	234.41	1.166132	234.41	1.216233	234.41	0.07651039	234.4	-0.06936888	234.4	-0.1020068	234.4	-0.08327141	234.4	-0.0881844	234.4	-0.05953889	234.4	-0.06835563	234.4	-0.06104772	234.4	-0.02869132
234.61	1.101734	234.61	1.157994	234.61	1.199598	234.61	1.248947	234.61	1.186303	234.61	1.16327	234.61	1.215828	234.61	0.07550003	234.6	-0.07271609	234.6	-0.09440824	234.6	-0.08576817	234.6	-0.09547101	234.6	-0.06519958	234.6	-0.06701092	234.6	-0.05775687	234.6	-0.0358426
234.81	1.105264	234.81	1.156894	234.81	1.200426	234.81	1.251481	234.81	1.180923	234.81	1.162923	234.81	1.22013	234.81	0.07914144	234.79	-0.06944411	234.79	-0.09223313	234.79	-0.08089307	234.79	-0.09112877	234.79	-0.06204996	234.79	-0.06892656	234.79	-0.06014591	234.79	-0.03224494
235.01	1.102273	235.01	1.159246	235.01	1.19869	235.01	1.249524	235.01	1.187132	235.01	1.164534	235.01	1.212744	235.01	0.07778578	235	-0.06983753	235	-0.09953599	235	-0.08159602	235	-0.09112669	235	-0.06317198	235	-0.06113101	235	-0.05747056	235	-0.03219165
235.21	1.099226	235.21	1.161883	235.21	1.202425	235.21	1.248319	235.21	1.185369	235.21	1.163644	235.21	1.207558	235.21	0.07591417	235.19	-0.06741907	235.19	-0.1000114	235.19	-0.08435488	235.19	-0.091742	235.19	-0.06580911	235.19	-0.06779752	235.19	-0.05670562	235.19	-0.03115074
235.41	1.102971	235.41	1.15774	235.41	1.196287	235.41	1.248211	235.41	1.186043	235.41	1.166008	235.41	1.217645	235.41	0.07464126	235.4	-0.0711912	235.4	-0.09438747	235.4	-0.08407138	235.4	-0.08903847	235.4	-0.06160782	235.4	-0.06580224	235.4	-0.05880265	235.4	-0.03399197
235.61	1.102189	235.61	1.156261	235.61	1.202543	235.61	1.250393	235.61	1.185402	235.61	1.163115	235.61	1.215723	235.61	0.07542719	235.59	-0.06879002	235.59	-0.09923044	235.59	-0.08528128	235.59	-0.09106831	235.59	-0.06338658	235.59	-0.064973	235.59	-0.0568036	235.59	-0.03093201
235.81	1.103104	235.81	1.156357	235.81	1.197585	235.81	1.249758	235.81	1.189107	235.81	1.163136	235.81	1.212267	235.81	0.07823255	235.8	-0.06817306	235.8	-0.09749602	235.8	-0.08194206	235.8	-0.08865083	235.8	-0.05906366	235.8	-0.06187694	235.8	-0.05558987	235.8	-0.03043009
236.01	1.100278	236.01	1.157732	236.01	1.201424	236.01	1.249869	236.01	1.184872	236.01	1.167313	236.01	1.215641	236.01	0.07392463	236	-0.07157969	236	-0.09446376	236	-0.08289772	236	-0.08806409	236	-0.06214703	236	-0.0620605	236	-0.05360787	236	-0.03499265
236.21	1.10142	236.21	1.163166	236.21	1.198278	236.21	1.254482	236.21	1.186826	236.21	1.165904	236.21	1.217317	236.21	0.07619485	236.2	-0.06820992	236.2	-0.09600371	236.2	-0.08129719	236.2	-0.08500751	236.2	-0.06041416	236.2	-0.06212436	236.2	-0.0567402	236.2	-0.03258977
236.41	1.106448	236.41	1.154697	236.41	1.199293	236.41	1.254108	236.41	1.188397	236.41	1.16422	236.41	1.221224	236.41	0.07465982	236.39	-0.0717207	236.39	-0.1005572	236.39	-0.08493342	236.39	-0.08731655	236.39	-0.06138164	236.39	-0.06711456	236.39	-0.05976631	236.39	-0.03290456
236.61	1.102207	236.61	1.154528	236.61	1.202747	236.61	1.250767	236.61	1.187692	236.61	1.166701	236.61	1.21476	236.61	0.0775005	236.59	-0.07139389	236.59	-0.1026913	236.59	-0.08113608	236.59	-0.09088665	236.59	-0.06218387	236.59	-0.06797677	236.59	-0.05761201	236.59	-0.02963195
236.81	1.10309	236.81	1.15933	236.81	1.203169	236.81	1.251529	236.81	1.184862	236.81	1.169432	236.81	1.214723	236.81	0.08097464	236.8	-0.06797119	236.8	-0.09377562	236.8	-0.0840795	236.8	-0.08671778	236.8	-0.06200527	236.8	-0.06011588	236.8	-0.05427999	236.8	-0.03128282
237.02	1.105784	237.02	1.160351	237.02	1.20028	237.02	1.249598	237.02	1.186821	237.02	1.164545	237.02	1.218673	237.02	0.07738034	237	-0.07114374	237	-0.09595182	237	-0.08516891	237	-0.08650296	237	-0.05509795	237	-0.06392588	237	-0.05819798	237	-0.03265354
237.21	1.103042	237.21	1.159106	237.21	1.203184	237.21	1.252173	237.21	1.183604	237.21	1.165019	237.21	1.218743	237.21	0.07359912	237.19	-0.07273659	237.19	-0.09594197	237.19	-0.08610912	237.19	-0.09207401	237.19	-0.06016574	237.19	-0.06444399	237.19	-0.05870197	237.19	-0.03652338
237.41	1.105963	237.41	1.161438	237.41	1.202464	237.41	1.252588	237.41	1.186217	237.41	1.167586	237.41	1.218247	237.41	0.07742253	237.39	-0.06693626	237.39	-0.09769337	237.39	-0.08093724	237.39	-0.08833464	237.39	-0.06126954	237.39	-0.064341	237.39	-0.05558605	237.39	-0.03235076
237.61	1.102975	237.61	1.160279	237.61	1.199827	237.61	1.246773	237.61	1.184757	237.61	1.164549	237.61	1.221345	237.61	0.07895578	237.6	-0.06833118	237.6	-0.09638462	237.6	-0.08221339	237.6	-0.09188052	237.6	-0.0593577	237.6	-0.06455991	237.6	-0.05897558	237.6	-0.03189828
237.81	1.109827	237.81	1.161568	237.81	1.200187	237.81	1.249179	237.81	1.187467	237.81	1.166098	237.81	1.2134	237.81	0.07666991	237.8	-0.06951862	237.8	-0.09573182	237.8	-0.08236203	237.8	-0.08778767	237.8	-0.06157879	237.8	-0.06151781	237.8	-0.05448796	237.8	-0.0330225
238.01	1.108109	238.01	1.15945	238.01	1.201905	238.01	1.251006	238.01	1.18599	238.01	1.166281	238.01	1.215619	238.01	0.07495034	238	-0.06802542	238	-0.1005623	238	-0.08508269	238	-0.08994114	238	-0.05854448	238	-0.06198198	238	-0.0556565	238	-0.03475209
238.21	1.105039	238.21	1.160823	238.21	1.200117	238.21	1.249793	238.21	1.191272	238.21	1.168809	238.21	1.216254	238.21	0.07648414	238.2	-0.07146294	238.2	-0.09869755	238.2	-0.08240192	238.2	-0.08888824	238.2	-0.05906894	238.2	-0.0660793	238.2	-0.05771454	238.2	-0.02849062
238.41	1.104988	238.41	1.159877	238.41	1.1968	238.41	1.251635	238.41	1.187137	238.41	1.166764	238.41	1.219939	238.41	0.08254953	238.4	-0.07287556	238.4	-0.09450521	238.4	-0.08228163	238.4	-0.08855464	238.4	-0.05551331	238.4	-0.06189188	238.4	-0.05701726	238.4	-0.03112824
238.61	1.104902	238.61	1.160241	238.61	1.200863	238.61	1.249173	238.61	1.191119	238.61	1.169633	238.61	1.216662	238.61	0.07863569	238.61	-0.06803385	238.61	-0.0971378	238.61	-0.08826145	238.61	-0.08893631	238.61	-0.05986018	238.61	-0.06529939	238.61	-0.05727116	238.61	-0.03270435
238.81	1.102677	238.81	1.163862	238.81	1.201078	238.81	1.250825	238.81	1.188789	238.81	1.17101	238.81	1.218554	238.81	0.07700613	238.8	-0.06830115	238.8	-0.09654436	238.8	-0.07772768	238.8	-0.087839	238.8	-0.06147612	238.8	-0.0586796	238.8	-0.05169239	238.8	-0.0280796
239.01	1.107182	239.01	1.162073	239.01	1.198035	239.01	1.250169	239.01	1.184717	239.01	1.168223	239.01	1.220508	239.01	0.08108746	238.99	-0.07224192	238.99	-0.09724648	238.99	-0.08768961	238.99	-0.08944894	238.99	-0.0581059	238.99	-0.06124204	238.99	-0.05876381	238.99	-0.03547226
239.21	1.105673	239.21	1.16399	239.21	1.202225	239.21	1.254339	239.21	1.186346	239.21	1.164492	239.21	1.218541	239.21	0.08093458	239.2	-0.0630318	239.2	-0.09403194	239.2	-0.08078881	239.2	-0.08296308	239.2	-0.05805276	239.2	-0.06808653	239.2	-0.05650578	239.2	-0.03387453
239.41	1.107163	239.41	1.164879	239.41	1.196167	239.41	1.246761	239.41	1.189922	239.41	1.169021	239.41	1.224461	239.41	0.08036497	239.39	-0.06949346	239.39	-0.0959561	239.39	-0.08332042	239.39	-0.08817801	239.39	-0.06072265	239.39	-0.06147123	239.39	-0.05779887	239.39	-0.03375794
239.61	1.108994	239.61	1.16088	239.61	1.200214	239.61	1.253873	239.61	1.190271	239.61	1.16781	239.61	1.219463	239.61	0.07560198	239.6	-0.06748543	239.6	-0.09683462	239.6	-0.08345968	239.6	-0.08343209	239.6	-0.06007099	239.6	-0.06286612	239.6	-0.06000994	239.6	-0.03263537
239.81	1.104484	239.81	1.162405	239.81	1.202654	239.81	1.257148	239.81	1.188846	239.81	1.169385	239.81	1.220773	239.81	0.07962527	239.8	-0.06906556	239.8	-0.09409287	239.8	-0.08052526	239.8	-0.0866638	239.8	-0.05874572	239.8	-0.06384751	239.8	-0.06087676	239.8	-0.03070087
240.01	1.105919	240.01	1.164661	240.01	1.201533	240.01	1.252524	240.01	1.193449	240.01	1.173367	240.01	1.218225	240.01	0.08060429	240	-0.06670845	240	-0.09821404	240	-0.08271623	240	-0.08869181	240	-0.05838936	240	-0.0618968	240	-0.05875336	240	-0.03485126
240.21	1.109844	240.21	1.159536	240.21	1.200534	240.21	1.248097	240.21	1.188208	240.21	1.165344	240.21	1.219673	240.21	0.0756356	240.19	-0.06828529	240.19	-0.09737884	240.19	-0.07995818	240.19	-0.08831067	240.19	-0.0570985	240.19	-0.06376879	240.19	-0.05501468	240.19	-0.03538677
240.41	1.10417	240.41	1.159083	240.41	1.199031	240.41	1.252838	240.41	1.188842	240.41	1.166689	240.41	1.223653	240.41	0.07905524	240.4	-0.06967986	240.4	-0.09980398	240.4	-0.08120389	240.4	-0.08998036	240.4	-0.0620039	240.4	-0.06711536	240.4	-0.05445202	240.4	-0.03464425
240.61	1.107109	240.61	1.157854	240.61	1.203646	240.61	1.253745	240.61	1.190329	240.61	1.164618	240.61	1.216176	240.61	0.07660958	240.59	-0.06851968	240.59	-0.09302276	240.59	-0.08227438	240.59	-0.08924358	240.59	-0.05909861	240.59	-0.06386008	240.59	-0.05740867	240.59	-0.03282912
240.81	1.105502	240.81	1.160546	240.81	1.199471	240.81	1.254598	240.81	1.18406	240.81	1.167287	240.81	1.218068	240.81	0.07507146	240.8	-0.06843748	240.8	-0.09951279	240.8	-0.07648797	240.8	-0.08533273	240.8	-0.05958373	240.8	-0.06021872	240.8	-0.05842244	240.8	-0.0323597
241.01	1.10463	241.01	1.157539	241.01	1.200756	241.01	1.253343	241.01	1.192375	241.01	1.172745	241.01	1.218762	241.01	0.08065768	240.99	-0.06781529	240.99	-0.09561267	240.99	-0.08357924	240.99	-0.08631812	240.99	-0.06152317	240.99	-0.06303657	240.99	-0.05826901	240.99	-0.02936718
241.21	1.10684	241.21	1.159289	241.21	1.203831	241.21	1.253089	241.21	1.1872	241.21	1.168373	241.21	1.221008	241.21	0.07989065	241.19	-0.0679872	241.19	-0.09440257	241.19	-0.08145459	241.19	-0.08400969	241.19	-0.05733098	241.19	-0.06311312	241.19	-0.05491898	241.19	-0.03290427
241.41	1.104559	241.41	1.170116	241.41	1.204327	241.41	1.255307	241.41	1.192145	241.41	1.166327	241.41	1.219828	241.41	0.07744474	241.4	-0.06914777	241.4	-0.09485719	241.4	-0.08073793	241.4	-0.08735028	241.4	-0.05858621	241.4	-0.0632148	241.4	-0.05982906	241.4	-0.03015202
241.61	1.109263	241.61	1.162345	241.61	1.198552	241.61	1.254898	241.61	1.189293	241.61	1.167824	241.61	1.221279	241.61	0.07576481	241.59	-0.06774772	241.59	-0.08714879	241.59	-0.07999772	241.59	-0.08714268	241.59	-0.05773437	241.59	-0.06110886	241.59	-0.0560935	241.59	-0.02888918
241.81	1.108816	241.81	1.156119	241.81	1.202609	241.81	1.257114	241.81	1.184181	241.81	1.171692	241.81	1.21872	241.81	0.07808776	241.79	-0.06647182	241.79	-0.09503363	241.79	-0.07921638	241.79	-0.08675197	241.79	-0.06039373	241.79	-0.06485571	241.79	-0.05470804	241.79	-0.03178052
242.01	1.108777	242.01	1.160359	242.01	1.201962	242.01	1.253271	242.01	1.190443	242.01	1.171618	242.01	1.22413	242.01	0.07757198	242	-0.06902019	242	-0.09483995	242	-0.07997589	242	-0.09049894	242	-0.05455795	242	-0.06293345	242	-0.05862851	242	-0.02739917
242.21	1.10862	242.21	1.159397	242.21	1.198743	242.21	1.251044	242.21	1.1877	242.21	1.168085	242.21	1.218497	242.21	0.07480685	242.2	-0.06694718	242.2	-0.09493069	242.2	-0.07966252	242.2	-0.08996662	242.2	-0.0560171	242.2	-0.0627555	242.2	-0.05655181	242.2	-0.030741
242.41	1.106129	242.41	1.166505	242.41	1.198164	242.41	1.250079	242.41	1.187473	242.41	1.168988	242.41	1.218523	242.41	0.07799252	242.39	-0.06797277	242.39	-0.09776168	242.39	-0.07911328	242.39	-0.08612676	242.39	-0.05746309	242.39	-0.06340133	242.39	-0.0528828	242.39	-0.03042744
242.61	1.108518	242.61	1.159388	242.61	1.204943	242.61	1.250767	242.61	1.189593	242.61	1.171788	242.61	1.220782	242.61	0.0834984	242.6	-0.06556836	242.6	-0.09629247	242.6	-0.07933049	242.6	-0.09195853	242.6	-0.06196322	242.6	-0.06622806	242.6	-0.0512546	242.6	-0.02859541
242.81	1.111923	242.81	1.165519	242.81	1.200026	242.81	1.252411	242.81	1.190699	242.81	1.170862	242.81	1.219304	242.81	0.07359232	242.8	-0.07049741	242.8	-0.09685177	242.8	-0.07968881	242.8	-0.08835819	242.8	-0.05824512	242.8	-0.06268033	242.8	-0.05537016	242.8	-0.02834094
243.01	1.108553	243.01	1.166129	243.01	1.204226	243.01	1.254907	243.01	1.193666	243.01	1.170049	243.01	1.219141	243.01	0.08138438	243	-0.06304491	243	-0.09762321	243	-0.0868725	243	-0.08705523	243	-0.06158392	243	-0.0602488	243	-0.05501612	243	-0.03134749
243.21	1.109517	243.21	1.167173	243.21	1.2082	243.21	1.251197	243.21	1.191836	243.21	1.170988	243.21	1.220474	243.21	0.08042643	243.19	-0.06347815	243.19	-0.09440859	243.19	-0.07927785	243.19	-0.08939935	243.19	-0.05991294	243.19	-0.06157851	243.19	-0.05584648	243.19	-0.03390934
243.41	1.107253	243.41	1.167382	243.41	1.203697	243.41	1.252852	243.41	1.194552	243.41	1.167328	243.41	1.222378	243.41	0.08037415	243.4	-0.06458765	243.4	-0.08994088	243.4	-0.07706933	243.4	-0.0887573	243.4	-0.058345	243.4	-0.06392878	243.4	-0.05629411	243.4	-0.0297753
243.61	1.109738	243.61	1.16668	243.61	1.205355	243.61	1.256019	243.61	1.194109	243.61	1.171996	243.61	1.217378	243.61	0.07985496	243.59	-0.06420392	243.59	-0.09611433	243.59	-0.07757714	243.59	-0.08656021	243.59	-0.05766286	243.59	-0.06179474	243.59	-0.05086597	243.59	-0.03028077
243.81	1.110387	243.81	1.166105	243.81	1.205152	243.81	1.25415	243.81	1.192268	243.81	1.17334	243.81	1.220309	243.81	0.0787126	243.79	-0.06389746	243.79	-0.09140936	243.79	-0.07932761	243.79	-0.08767788	243.79	-0.05832962	243.79	-0.06291806	243.79	-0.054505	243.79	-0.03183598
244.01	1.107436	244.01	1.170676	244.01	1.204949	244.01	1.254408	244.01	1.188206	244.01	1.169143	244.01	1.220733	244.01	0.080036	244	-0.06921882	244	-0.09368405	244	-0.08317853	244	-0.08128811	244	-0.06090921	244	-0.06158989	244	-0.05026685	244	-0.02883225
244.21	1.110123	244.21	1.160211	244.21	1.200927	244.21	1.257874	244.21	1.191427	244.21	1.166783	244.21	1.221163	244.21	0.08240929	244.19	-0.06969026	244.19	-0.09492972	244.19	-0.08425497	244.19	-0.08444674	244.19	-0.05805606	244.19	-0.06523538	244.19	-0.05435894	244.19	-0.03261252
244.41	1.108684	244.41	1.163541	244.41	1.206031	244.41	1.256043	244.41	1.186347	244.41	1.169273	244.41	1.2178	244.41	0.0785748	244.4	-0.06848282	244.4	-0.09562013	244.4	-0.07854185	244.4	-0.08420239	244.4	-0.05883499	244.4	-0.06361312	244.4	-0.05582386	244.4	-0.02666876
244.61	1.111519	244.61	1.162773	244.61	1.204387	244.61	1.24969	244.61	1.192434	244.61	1.172185	244.61	1.218102	244.61	0.07785797	244.6	-0.06703989	244.6	-0.09160954	244.6	-0.08060792	244.6	-0.08330847	244.6	-0.05799923	244.6	-0.06311332	244.6	-0.05245265	244.6	-0.02938757
244.82	1.108471	244.82	1.162626	244.82	1.208919	244.82	1.257017	244.82	1.193936	244.82	1.171468	244.82	1.223041	244.82	0.08499768	244.79	-0.06372204	244.79	-0.09407742	244.79	-0.08187456	244.79	-0.08564544	244.79	-0.05946315	244.79	-0.0631577	244.79	-0.05328903	244.79	-0.02833659
245.01	1.108797	245.01	1.164129	245.01	1.210229	245.01	1.251784	245.01	1.193655	245.01	1.170708	245.01	1.220475	245.01	0.08215319	244.99	-0.06315453	244.99	-0.09149149	244.99	-0.08258879	244.99	-0.0826094	244.99	-0.05688472	244.99	-0.05933521	244.99	-0.05064939	244.99	-0.02674928
245.21	1.105276	245.21	1.16482	245.21	1.205958	245.21	1.249283	245.21	1.19537	245.21	1.164656	245.21	1.217781	245.21	0.07870605	245.2	-0.06501822	245.2	-0.09355936	245.2	-0.0770191	245.2	-0.08642045	245.2	-0.05104821	245.2	-0.06314426	245.2	-0.05617272	245.2	-0.0264241
245.41	1.107865	245.41	1.164834	245.41	1.206297	245.41	1.2547	245.41	1.189651	245.41	1.17135	245.41	1.216129	245.41	0.08293131	245.4	-0.06661777	245.4	-0.09401616	245.4	-0.08054828	245.4	-0.08392945	245.4	-0.05429662	245.4	-0.06510152	245.4	-0.05764007	245.4	-0.03134437
245.61	1.106411	245.61	1.162938	245.61	1.207228	245.61	1.255905	245.61	1.193174	245.61	1.172069	245.61	1.223876	245.61	0.0840677	245.59	-0.06419074	245.59	-0.09186643	245.59	-0.07842325	245.59	-0.08657273	245.59	-0.05516031	245.59	-0.05546815	245.59	-0.05714377	245.59	-0.02761975
245.81	1.109807	245.81	1.167922	245.81	1.20314	245.81	1.259205	245.81	1.194464	245.81	1.167401	245.81	1.223815	245.81	0.08198106	245.79	-0.07231337	245.79	-0.09886757	245.79	-0.07812759	245.79	-0.08961175	245.79	-0.05332251	245.79	-0.05670374	245.79	-0.05467294	245.79	-0.02771164
246.01	1.114515	246.01	1.17103	246.01	1.210895	246.01	1.260314	246.01	1.194742	246.01	1.17259	246.01	1.221381	246.01	0.081545	246	-0.06525313	246	-0.09500575	246	-0.08522117	246	-0.08765506	246	-0.05488043	246	-0.06325055	246	-0.0525788	246	-0.02951424
246.21	1.106281	246.21	1.166953	246.21	1.20472	246.21	1.25577	246.21	1.19068	246.21	1.170721	246.21	1.221429	246.21	0.08030045	246.2	-0.06474524	246.2	-0.09508698	246.2	-0.07814989	246.2	-0.08406303	246.2	-0.05484612	246.2	-0.06585101	246.2	-0.05540764	246.2	-0.02768925
246.41	1.11187	246.41	1.162536	246.41	1.209734	246.41	1.257378	246.41	1.191284	246.41	1.172421	246.41	1.226329	246.41	0.08049087	246.39	-0.06566118	246.39	-0.09466227	246.39	-0.07910357	246.39	-0.08477642	246.39	-0.05247221	246.39	-0.06298155	246.39	-0.05412021	246.39	-0.03021578
246.61	1.106473	246.61	1.163637	246.61	1.203389	246.61	1.255597	246.61	1.196393	246.61	1.17171	246.61	1.222923	246.61	0.08209328	246.59	-0.06572325	246.59	-0.09322166	246.59	-0.07705622	246.59	-0.08494452	246.59	-0.05530911	246.59	-0.05884465	246.59	-0.05563778	246.59	-0.03224511
246.81	1.107865	246.81	1.161713	246.81	1.209399	246.81	1.255504	246.81	1.195686	246.81	1.171288	246.81	1.223153	246.81	0.08255325	246.79	-0.06394914	246.79	-0.09027611	246.79	-0.07505761	246.79	-0.08464661	246.79	-0.05655004	246.79	-0.05996507	246.79	-0.05340661	246.79	-0.03449795
247.01	1.112294	247.01	1.162764	247.01	1.20512	247.01	1.253906	247.01	1.19362	247.01	1.171152	247.01	1.21812	247.01	0.08425266	247	-0.06745213	247	-0.0936401	247	-0.07984997	247	-0.08479476	247	-0.0573904	247	-0.05836232	247	-0.05227672	247	-0.02612751
247.21	1.11137	247.21	1.164261	247.21	1.206931	247.21	1.256217	247.21	1.19375	247.21	1.171534	247.21	1.219166	247.21	0.08074966	247.19	-0.06767727	247.19	-0.09715056	247.19	-0.08012222	247.19	-0.08010813	247.19	-0.05309423	247.19	-0.05972012	247.19	-0.05379942	247.19	-0.02899344
247.41	1.111679	247.41	1.165024	247.41	1.201545	247.41	1.257269	247.41	1.19379	247.41	1.174234	247.41	1.224173	247.41	0.07807491	247.4	-0.06376014	247.4	-0.09595682	247.4	-0.07799808	247.4	-0.08576337	247.4	-0.05397985	247.4	-0.05626372	247.4	-0.05635298	247.4	-0.02849622
247.61	1.111099	247.61	1.161589	247.61	1.210434	247.61	1.250669	247.61	1.191762	247.61	1.169007	247.61	1.222292	247.61	0.08379891	247.59	-0.06143556	247.59	-0.09339357	247.59	-0.07833922	247.59	-0.08685894	247.59	-0.05583077	247.59	-0.05869553	247.59	-0.05638718	247.59	-0.02518279
247.81	1.110345	247.81	1.164764	247.81	1.210217	247.81	1.254349	247.81	1.195241	247.81	1.173447	247.81	1.222963	247.81	0.07992167	247.8	-0.06534935	247.8	-0.09493858	247.8	-0.07665778	247.8	-0.08136284	247.8	-0.05367923	247.8	-0.05819218	247.8	-0.05893375	247.8	-0.02739164
248.01	1.107394	248.01	1.166873	248.01	1.206747	248.01	1.255278	248.01	1.199268	248.01	1.170614	248.01	1.22403	248.01	0.08040702	247.99	-0.06214194	247.99	-0.09417927	247.99	-0.07944115	247.99	-0.08593712	247.99	-0.05930332	247.99	-0.05901527	247.99	-0.04956451	247.99	-0.02964876
248.21	1.113953	248.21	1.169884	248.21	1.205437	248.21	1.25527	248.21	1.19339	248.21	1.172389	248.21	1.220405	248.21	0.08049845	248.19	-0.06354558	248.19	-0.09112566	248.19	-0.08011841	248.19	-0.0855655	248.19	-0.0577953	248.19	-0.05893102	248.19	-0.0543253	248.19	-0.0271975
248.41	1.109591	248.41	1.165034	248.41	1.209345	248.41	1.253733	248.41	1.195851	248.41	1.174989	248.41	1.225053	248.41	0.08142837	248.39	-0.06588862	248.39	-0.09164567	248.39	-0.07777447	248.39	-0.08552475	248.39	-0.05518206	248.39	-0.06040467	248.39	-0.05269194	248.39	-0.02884636
248.61	1.112297	248.61	1.166354	248.61	1.204747	248.61	1.260196	248.61	1.199373	248.61	1.171221	248.61	1.224669	248.61	0.08127011	248.6	-0.063645	248.6	-0.0936113	248.6	-0.07818232	248.6	-0.08653229	248.6	-0.0572133	248.6	-0.06108847	248.6	-0.05207634	248.6	-0.02674528
248.81	1.110279	248.81	1.167957	248.81	1.205793	248.81	1.255216	248.81	1.194025	248.81	1.171065	248.81	1.226022	248.81	0.08147893	248.79	-0.06919312	248.79	-0.0919771	248.79	-0.07855718	248.79	-0.0823895	248.79	-0.05700123	248.79	-0.05857727	248.79	-0.04822027	248.79	-0.02703802
249.01	1.114954	249.01	1.163593	249.01	1.20415	249.01	1.25112	249.01	1.194615	249.01	1.169386	249.01	1.224528	249.01	0.07979798	249	-0.06389914	249	-0.09091583	249	-0.07721219	249	-0.08784857	249	-0.0539359	249	-0.06146691	249	-0.05277578	249	-0.02921102
249.22	1.110914	249.22	1.167629	249.22	1.20739	249.22	1.255594	249.22	1.192986	249.22	1.173146	249.22	1.218451	249.22	0.08409077	249.2	-0.06359319	249.2	-0.09605855	249.2	-0.080667	249.2	-0.08621017	249.2	-0.05312656	249.2	-0.05960979	249.2	-0.05812172	249.2	-0.03086195
249.41	1.108688	249.41	1.169932	249.41	1.207046	249.41	1.257711	249.41	1.195635	249.41	1.170203	249.41	1.226196	249.41	0.08473912	249.4	-0.06689436	249.4	-0.09441852	249.4	-0.08075301	249.4	-0.08387237	249.4	-0.05596546	249.4	-0.06053781	249.4	-0.04943101	249.4	-0.02806414
249.61	1.111391	249.61	1.162585	249.61	1.205879	249.61	1.26166	249.61	1.193199	249.61	1.169975	249.61	1.220943	249.61	0.08338518	249.6	-0.0627263	249.6	-0.09137009	249.6	-0.08060122	249.6	-0.089223	249.6	-0.05560494	249.6	-0.06016621	249.6	-0.05309391	249.6	-0.03066927
249.81	1.109663	249.81	1.168377	249.81	1.20708	249.81	1.25908	249.81	1.19481	249.81	1.175463	249.81	1.224308	249.81	0.08019	249.79	-0.06604134	249.79	-0.08594624	249.79	-0.07833168	249.79	-0.08223497	249.79	-0.05332305	249.79	-0.0596225	249.79	-0.05393806	249.79	-0.02960881
250.01	1.111095	250.01	1.164267	250.01	1.208828	250.01	1.261603	250.01	1.194598	250.01	1.173942	250.01	1.224501	250.01	0.08210614	250	-0.06561042	250	-0.09232873	250	-0.07974389	250	-0.08344933	250	-0.0549425	250	-0.05724096	250	-0.05193269	250	-0.02961749
250.21	1.118507	250.21	1.166349	250.21	1.205081	250.21	1.258288	250.21	1.192919	250.21	1.17653	250.21	1.224242	250.21	0.08330296	250.19	-0.06381907	250.19	-0.09015244	250.19	-0.07375681	250.19	-0.08671086	250.19	-0.05645883	250.19	-0.0600263	250.19	-0.04969165	250.19	-0.0267469
250.41	1.116232	250.41	1.169118	250.41	1.211631	250.41	1.25606	250.41	1.200933	250.41	1.173895	250.41	1.226862	250.41	0.0837656	250.4	-0.0624028	250.4	-0.0918223	250.4	-0.076832	250.4	-0.08686173	250.4	-0.05714662	250.4	-0.064302	250.4	-0.05261837	250.4	-0.02615079
250.61	1.114978	250.61	1.17034	250.61	1.20946	250.61	1.260891	250.61	1.191091	250.61	1.169389	250.61	1.223775	250.61	0.08018941	250.59	-0.06173914	250.59	-0.09231055	250.59	-0.07911057	250.59	-0.08269039	250.59	-0.05986143	250.59	-0.05932869	250.59	-0.04689674	250.59	-0.02917754
250.81	1.110635	250.81	1.168265	250.81	1.210332	250.81	1.256079	250.81	1.195599	250.81	1.172177	250.81	1.226683	250.81	0.08758733	250.79	-0.06806754	250.79	-0.08802736	250.79	-0.07810804	250.79	-0.08490761	250.79	-0.05766164	250.79	-0.05993343	250.79	-0.05241189	250.79	-0.02649068
251.01	1.113406	251.01	1.169475	251.01	1.211189	251.01	1.259608	251.01	1.19606	251.01	1.173529	251.01	1.223741	251.01	0.08119097	251	-0.06519406	251	-0.09211062	251	-0.08013197	251	-0.08357776	251	-0.05429379	251	-0.06160118	251	-0.05069692	251	-0.02740179
251.21	1.115657	251.21	1.168186	251.21	1.208151	251.21	1.256892	251.21	1.19124	251.21	1.173864	251.21	1.223544	251.21	0.0823517	251.2	-0.06242254	251.2	-0.09141074	251.2	-0.07744531	251.2	-0.08641361	251.2	-0.05342257	251.2	-0.06002732	251.2	-0.05351128	251.2	-0.02947882
251.41	1.110326	251.41	1.17232	251.41	1.21012	251.41	1.258015	251.41	1.195064	251.41	1.174844	251.41	1.227881	251.41	0.07938413	251.39	-0.06299793	251.39	-0.08875997	251.39	-0.07536344	251.39	-0.0850034	251.39	-0.05707514	251.39	-0.05845803	251.39	-0.05090413	251.39	-0.02178403
251.61	1.113037	251.61	1.171344	251.61	1.207879	251.61	1.255055	251.61	1.195152	251.61	1.171358	251.61	1.227312	251.61	0.08283503	251.59	-0.06367618	251.59	-0.09104809	251.59	-0.07849804	251.59	-0.08890486	251.59	-0.05319857	251.59	-0.05809725	251.59	-0.05131104	251.59	-0.02401691
251.81	1.1189	251.81	1.16662	251.81	1.210359	251.81	1.25806	251.81	1.192904	251.81	1.174845	251.81	1.223231	251.81	0.08260479	251.8	-0.0694792	251.8	-0.0943073	251.8	-0.08121281	251.8	-0.08237464	251.8	-0.05278447	251.8	-0.06125208	251.8	-0.04545772	251.8	-0.026934
252.01	1.113338	252.01	1.170886	252.01	1.205854	252.01	1.252737	252.01	1.194615	252.01	1.174045	252.01	1.228174	252.01	0.08345821	251.99	-0.06089612	251.99	-0.09439402	251.99	-0.07817565	251.99	-0.08489786	251.99	-0.05508973	251.99	-0.05976108	251.99	-0.05860154	251.99	-0.02917347
252.21	1.111743	252.21	1.167082	252.21	1.210112	252.21	1.260394	252.21	1.194861	252.21	1.172431	252.21	1.226026	252.21	0.07918175	252.2	-0.06497848	252.2	-0.0897172	252.2	-0.08056048	252.2	-0.08384867	252.2	-0.05202772	252.2	-0.05887895	252.2	-0.05085047	252.2	-0.02119078
252.41	1.11455	252.41	1.16708	252.41	1.213539	252.41	1.261994	252.41	1.198564	252.41	1.173379	252.41	1.220139	252.41	0.08528496	252.39	-0.06211822	252.39	-0.09232502	252.39	-0.07915602	252.39	-0.08741558	252.39	-0.05449614	252.39	-0.05997312	252.39	-0.05280072	252.39	-0.02762595
252.61	1.117636	252.61	1.17234	252.61	1.207989	252.61	1.258718	252.61	1.197629	252.61	1.17343	252.61	1.225455	252.61	0.08045431	252.59	-0.06400976	252.59	-0.09077937	252.59	-0.07463805	252.59	-0.08924718	252.59	-0.05473632	252.59	-0.05594052	252.59	-0.05135096	252.59	-0.02668669
252.81	1.112831	252.81	1.167923	252.81	1.209447	252.81	1.25633	252.81	1.19801	252.81	1.179879	252.81	1.227745	252.81	0.08012276	252.8	-0.0681311	252.8	-0.09386765	252.8	-0.07860158	252.8	-0.08391764	252.8	-0.0512675	252.8	-0.05466163	252.8	-0.05247261	252.8	-0.03067992
253.01	1.113558	253.01	1.166429	253.01	1.204667	253.01	1.25812	253.01	1.196794	253.01	1.176655	253.01	1.226908	253.01	0.08482682	253	-0.06363204	253	-0.09302371	253	-0.08197875	253	-0.08388287	253	-0.05367318	253	-0.05682683	253	-0.04903079	253	-0.02531369
253.21	1.119243	253.21	1.166647	253.21	1.208853	253.21	1.259795	253.21	1.198469	253.21	1.169907	253.21	1.227642	253.21	0.08501188	253.19	-0.06510746	253.19	-0.09349481	253.19	-0.07659865	253.19	-0.08596454	253.19	-0.05373192	253.19	-0.06174364	253.19	-0.05124241	253.19	-0.02736201
253.41	1.114835	253.41	1.168078	253.41	1.209511	253.41	1.254621	253.41	1.196177	253.41	1.174688	253.41	1.222318	253.41	0.08587386	253.4	-0.0655317	253.4	-0.09222735	253.4	-0.07868905	253.4	-0.08274262	253.4	-0.05516308	253.4	-0.05548097	253.4	-0.04722816	253.4	-0.03082081
253.61	1.112335	253.61	1.172691	253.61	1.21035	253.61	1.254843	253.61	1.194244	253.61	1.177347	253.61	1.228942	253.61	0.08505503	253.59	-0.06579515	253.59	-0.08815087	253.59	-0.07744865	253.59	-0.08153588	253.59	-0.05329136	253.59	-0.05797355	253.59	-0.05221035	253.59	-0.0275794
253.81	1.118324	253.81	1.173176	253.81	1.207469	253.81	1.258896	253.81	1.200149	253.81	1.177217	253.81	1.227662	253.81	0.08301824	253.79	-0.06044306	253.79	-0.09163832	253.79	-0.07762294	253.79	-0.08568035	253.79	-0.05125663	253.79	-0.05775176	253.79	-0.04788882	253.79	-0.02503075
254.01	1.116407	254.01	1.168123	254.01	1.205948	254.01	1.260305	254.01	1.200081	254.01	1.181499	254.01	1.228875	254.01	0.08193545	253.99	-0.06386067	253.99	-0.08901361	253.99	-0.0764051	253.99	-0.08366007	253.99	-0.05287191	253.99	-0.06049452	253.99	-0.04829154	253.99	-0.02331432
254.21	1.111585	254.21	1.172503	254.21	1.21123	254.21	1.258894	254.21	1.199075	254.21	1.176778	254.21	1.225763	254.21	0.07950962	254.19	-0.06111851	254.19	-0.09359831	254.19	-0.07477894	254.19	-0.08284824	254.19	-0.0514786	254.19	-0.05853674	254.19	-0.05056023	254.19	-0.02891091
254.41	1.116041	254.41	1.170193	254.41	1.211844	254.41	1.254326	254.41	1.191204	254.41	1.176671	254.41	1.226845	254.41	0.0869881	254.4	-0.06376683	254.4	-0.09089366	254.4	-0.07633404	254.4	-0.08186849	254.4	-0.05144855	254.4	-0.05717564	254.4	-0.05153333	254.4	-0.02316928
254.61	1.117455	254.61	1.170668	254.61	1.210374	254.61	1.26112	254.61	1.195318	254.61	1.178097	254.61	1.226098	254.61	0.08939679	254.59	-0.0656887	254.59	-0.08840187	254.59	-0.07869858	254.59	-0.07926137	254.59	-0.05013262	254.59	-0.05937455	254.59	-0.04546434	254.59	-0.03080585
254.81	1.11804	254.81	1.171182	254.81	1.206607	254.81	1.26109	254.81	1.195616	254.81	1.174651	254.81	1.22632	254.81	0.08172237	254.79	-0.06775483	254.79	-0.08993283	254.79	-0.07581071	254.79	-0.08476888	254.79	-0.05027972	254.79	-0.0563823	254.79	-0.04981797	254.79	-0.02480928
255.01	1.118624	255.01	1.167609	255.01	1.209615	255.01	1.261806	255.01	1.197167	255.01	1.175418	255.01	1.226347	255.01	0.08193322	255	-0.06403908	255	-0.09008076	255	-0.07473213	255	-0.08425061	255	-0.05451139	255	-0.0542548	255	-0.05474767	255	-0.02879383
255.21	1.119715	255.21	1.171542	255.21	1.211919	255.21	1.262732	255.21	1.195026	255.21	1.17626	255.21	1.225313	255.21	0.0813964	255.2	-0.06249798	255.2	-0.0878317	255.2	-0.0842044	255.2	-0.08541819	255.2	-0.05231878	255.2	-0.06029411	255.2	-0.05479646	255.2	-0.03267374
255.41	1.11186	255.41	1.167282	255.41	1.209983	255.41	1.2608	255.41	1.199441	255.41	1.174426	255.41	1.229563	255.41	0.08633956	255.4	-0.06205222	255.4	-0.09123135	255.4	-0.07616009	255.4	-0.08383328	255.4	-0.05448452	255.4	-0.05900268	255.4	-0.05090153	255.4	-0.02457598
255.61	1.114075	255.61	1.172298	255.61	1.208836	255.61	1.257612	255.61	1.20102	255.61	1.177827	255.61	1.226251	255.61	0.08475032	255.6	-0.06101383	255.6	-0.09210514	255.6	-0.07645781	255.6	-0.07996836	255.6	-0.04983689	255.6	-0.05774749	255.6	-0.04396309	255.6	-0.02227151
255.81	1.111898	255.81	1.170905	255.81	1.211015	255.81	1.257022	255.81	1.19981	255.81	1.175086	255.81	1.228997	255.81	0.08395578	255.8	-0.06176395	255.8	-0.08751737	255.8	-0.0794468	255.8	-0.0803315	255.8	-0.05340065	255.8	-0.05739249	255.8	-0.0512042	255.8	-0.02550181
256.01	1.109123	256.01	1.167837	256.01	1.208411	256.01	1.262502	256.01	1.199532	256.01	1.177823	256.01	1.227572	256.01	0.08626638	255.99	-0.06002803	255.99	-0.08743667	255.99	-0.07250758	255.99	-0.0786683	255.99	-0.04554667	255.99	-0.05605941	255.99	-0.04962519	255.99	-0.019941
256.21	1.113679	256.21	1.168444	256.21	1.209489	256.21	1.260583	256.21	1.200699	256.21	1.176068	256.21	1.228854	256.21	0.08358737	256.2	-0.0613245	256.2	-0.09260821	256.2	-0.07675693	256.2	-0.0807695	256.2	-0.05185008	256.2	-0.05126742	256.2	-0.05315739	256.2	-0.02050635
256.41	1.115071	256.41	1.171384	256.41	1.209888	256.41	1.259953	256.41	1.193569	256.41	1.177315	256.41	1.223544	256.41	0.08387136	256.41	-0.06281878	256.41	-0.09228525	256.41	-0.07050473	256.41	-0.07965586	256.41	-0.050177	256.41	-0.05910234	256.41	-0.04824156	256.41	-0.02418385
256.61	1.117054	256.61	1.167248	256.61	1.212533	256.61	1.260474	256.61	1.20163	256.61	1.176759	256.61	1.226577	256.61	0.08677196	256.59	-0.06417396	256.59	-0.08750477	256.59	-0.074297	256.59	-0.08313853	256.59	-0.05399776	256.59	-0.06025418	256.59	-0.04733216	256.59	-0.03087981
256.81	1.113851	256.81	1.168453	256.81	1.211118	256.81	1.260195	256.81	1.199427	256.81	1.177509	256.81	1.222944	256.81	0.08458768	256.79	-0.05981477	256.79	-0.08948736	256.79	-0.07716363	256.79	-0.08055258	256.79	-0.05482093	256.79	-0.05685261	256.79	-0.05014887	256.79	-0.02251791
257.01	1.11521	257.01	1.170367	257.01	1.205464	257.01	1.258922	257.01	1.201278	257.01	1.177244	257.01	1.227293	257.01	0.08529617	257	-0.06282035	257	-0.08814705	257	-0.0751579	257	-0.08121785	257	-0.05005411	257	-0.05797387	257	-0.04754094	257	-0.02592066
257.21	1.109414	257.21	1.171807	257.21	1.213612	257.21	1.264959	257.21	1.200312	257.21	1.178133	257.21	1.228502	257.21	0.08360271	257.19	-0.06092151	257.19	-0.09051437	257.19	-0.076393	257.19	-0.08153411	257.19	-0.04865317	257.19	-0.05790439	257.19	-0.05178442	257.19	-0.0279379
257.41	1.112288	257.41	1.169335	257.41	1.210631	257.41	1.259502	257.41	1.197438	257.41	1.181494	257.41	1.230221	257.41	0.0835664	257.39	-0.06408329	257.39	-0.08824991	257.39	-0.07634442	257.39	-0.07960389	257.39	-0.05092673	257.39	-0.05797087	257.39	-0.05375895	257.39	-0.02609069
257.61	1.116434	257.61	1.174381	257.61	1.208796	257.61	1.260234	257.61	1.194514	257.61	1.17624	257.61	1.227331	257.61	0.08913705	257.6	-0.06576689	257.6	-0.08900645	257.6	-0.07608686	257.6	-0.08246264	257.6	-0.05122455	257.6	-0.05689476	257.6	-0.05592117	257.6	-0.022545
257.81	1.117907	257.81	1.167366	257.81	1.209355	257.81	1.262208	257.81	1.202107	257.81	1.17713	257.81	1.229946	257.81	0.09019823	257.79	-0.06113711	257.79	-0.09264959	257.79	-0.07576233	257.79	-0.08340066	257.79	-0.05541181	257.79	-0.05378572	257.79	-0.048546	257.79	-0.02033414
258.01	1.117067	258.01	1.172069	258.01	1.213111	258.01	1.263384	258.01	1.195186	258.01	1.179636	258.01	1.230016	258.01	0.08698905	257.99	-0.06335317	257.99	-0.09279992	257.99	-0.07318232	257.99	-0.08129112	257.99	-0.05052166	257.99	-0.05720611	257.99	-0.0461851	257.99	-0.02866631
258.21	1.115452	258.21	1.170244	258.21	1.209717	258.21	1.264809	258.21	1.197418	258.21	1.177101	258.21	1.231517	258.21	0.08354818	258.19	-0.0645373	258.19	-0.09268982	258.19	-0.07711338	258.19	-0.08073936	258.19	-0.05057688	258.19	-0.05654101	258.19	-0.0499787	258.19	-0.02410506
258.41	1.111739	258.41	1.169082	258.41	1.21213	258.41	1.263764	258.41	1.202398	258.41	1.178281	258.41	1.231057	258.41	0.0807901	258.4	-0.06251435	258.4	-0.09019913	258.4	-0.07197428	258.4	-0.08345705	258.4	-0.04974797	258.4	-0.06190428	258.4	-0.05078272	258.4	-0.02695443
258.61	1.11293	258.61	1.170087	258.61	1.214097	258.61	1.259564	258.61	1.20237	258.61	1.17821	258.61	1.229632	258.61	0.08786212	258.59	-0.06640567	258.59	-0.09036177	258.59	-0.07233945	258.59	-0.08020322	258.59	-0.04673459	258.59	-0.05494706	258.59	-0.05130133	258.59	-0.02010207
258.82	1.115373	258.82	1.171694	258.82	1.213944	258.82	1.256598	258.82	1.193536	258.82	1.177443	258.82	1.226813	258.82	0.0836563	258.8	-0.06490821	258.8	-0.08865994	258.8	-0.07664152	258.8	-0.0807775	258.8	-0.0534065	258.8	-0.05820361	258.8	-0.04635969	258.8	-0.02514415
259.01	1.118841	259.01	1.169387	259.01	1.210603	259.01	1.260832	259.01	1.200293	259.01	1.179954	259.01	1.225827	259.01	0.08542022	259	-0.06017002	259	-0.08955849	259	-0.07360201	259	-0.08272966	259	-0.05061998	259	-0.05264588	259	-0.05039762	259	-0.02190047
259.21	1.114613	259.21	1.169613	259.21	1.21476	259.21	1.261163	259.21	1.202705	259.21	1.174137	259.21	1.226635	259.21	0.08652078	259.19	-0.06254209	259.19	-0.08397394	259.19	-0.0726611	259.19	-0.08002241	259.19	-0.05273603	259.19	-0.05383768	259.19	-0.05334808	259.19	-0.02519022
259.41	1.118933	259.41	1.172646	259.41	1.209982	259.41	1.265828	259.41	1.200666	259.41	1.178867	259.41	1.228307	259.41	0.08576196	259.4	-0.05709153	259.4	-0.0863481	259.4	-0.07470544	259.4	-0.08139077	259.4	-0.04998829	259.4	-0.0529204	259.4	-0.04784689	259.4	-0.02821696
259.61	1.119112	259.61	1.17646	259.61	1.207052	259.61	1.258449	259.61	1.204556	259.61	1.179542	259.61	1.229368	259.61	0.08710114	259.6	-0.05865503	259.6	-0.08973633	259.6	-0.07556659	259.6	-0.08018367	259.6	-0.0516483	259.6	-0.05808244	259.6	-0.0494018	259.6	-0.02731249
259.81	1.116619	259.81	1.167522	259.81	1.212129	259.81	1.263021	259.81	1.198286	259.81	1.175158	259.81	1.23388	259.81	0.08587593	259.8	-0.05889751	259.8	-0.0863549	259.8	-0.0784061	259.8	-0.07951176	259.8	-0.05101354	259.8	-0.05495483	259.8	-0.04674929	259.8	-0.02821573
260.01	1.121892	260.01	1.174007	260.01	1.20704	260.01	1.261875	260.01	1.200631	260.01	1.178376	260.01	1.230905	260.01	0.08720423	259.99	-0.05766473	259.99	-0.08484925	259.99	-0.0788045	259.99	-0.08463278	259.99	-0.04826965	259.99	-0.05383202	259.99	-0.04499388	259.99	-0.02656556
260.21	1.116333	260.21	1.1735	260.21	1.209785	260.21	1.265046	260.21	1.204668	260.21	1.173059	260.21	1.222536	260.21	0.08652905	260.2	-0.05998623	260.2	-0.08613462	260.2	-0.07420278	260.2	-0.08099138	260.2	-0.04777949	260.2	-0.05760496	260.2	-0.05176531	260.2	-0.02275658
260.41	1.114903	260.41	1.174037	260.41	1.216069	260.41	1.263965	260.41	1.204286	260.41	1.177845	260.41	1.226552	260.41	0.08772452	260.4	-0.06344257	260.4	-0.08860178	260.4	-0.07833006	260.4	-0.07700514	260.4	-0.05315157	260.4	-0.05362303	260.4	-0.05342309	260.4	-0.02446719
260.61	1.1192	260.61	1.170283	260.61	1.212676	260.61	1.259939	260.61	1.2041	260.61	1.178867	260.61	1.231521	260.61	0.08585163	260.59	-0.05919937	260.59	-0.09028405	260.59	-0.07184765	260.59	-0.08506979	260.59	-0.05067945	260.59	-0.05919082	260.59	-0.04984654	260.59	-0.02511624
260.81	1.118356	260.81	1.17234	260.81	1.212104	260.81	1.261474	260.81	1.197036	260.81	1.177978	260.81	1.232453	260.81	0.08722539	260.79	-0.06531764	260.79	-0.0899517	260.79	-0.07067458	260.79	-0.08301093	260.79	-0.04892254	260.79	-0.05760173	260.79	-0.04956024	260.79	-0.02646247
261.01	1.117151	261.01	1.170779	261.01	1.214702	261.01	1.262666	261.01	1.201932	261.01	1.17863	261.01	1.227562	261.01	0.08850789	260.99	-0.06462501	260.99	-0.08772383	260.99	-0.07897209	260.99	-0.08455518	260.99	-0.05429459	260.99	-0.05413448	260.99	-0.04787051	260.99	-0.02569734
261.23	1.113841	261.23	1.173952	261.23	1.212641	261.23	1.265128	261.23	1.198879	261.23	1.177045	261.23	1.232372	261.23	0.08622219	261.2	-0.05989874	261.2	-0.08479583	261.2	-0.07350311	261.2	-0.08156541	261.2	-0.05145806	261.2	-0.05718744	261.2	-0.04965616	261.2	-0.02561288
261.41	1.1216	261.41	1.174806	261.41	1.215246	261.41	1.259251	261.41	1.201069	261.41	1.174931	261.41	1.228684	261.41	0.08952313	261.39	-0.06060949	261.39	-0.08453317	261.39	-0.0799052	261.39	-0.07777739	261.39	-0.04891075	261.39	-0.05240514	261.39	-0.04950669	261.39	-0.02742975
261.61	1.12657	261.61	1.174801	261.61	1.214444	261.61	1.259217	261.61	1.202203	261.61	1.181041	261.61	1.231332	261.61	0.08772598	261.6	-0.06171483	261.6	-0.08795618	261.6	-0.07328091	261.6	-0.07810212	261.6	-0.04782758	261.6	-0.05564168	261.6	-0.0500591	261.6	-0.02559607
261.81	1.119244	261.81	1.171664	261.81	1.215929	261.81	1.262249	261.81	1.203918	261.81	1.176098	261.81	1.226844	261.81	0.08589046	261.79	-0.06089306	261.79	-0.08628311	261.79	-0.07486825	261.79	-0.08210755	261.79	-0.05076889	261.79	-0.05504723	261.79	-0.05020187	261.79	-0.02559338
262.01	1.117729	262.01	1.171549	262.01	1.216242	262.01	1.260037	262.01	1.196439	262.01	1.181916	262.01	1.231412	262.01	0.08750174	262	-0.06416842	262	-0.08899342	262	-0.07278378	262	-0.08349345	262	-0.04373566	262	-0.05530125	262	-0.0479253	262	-0.02680801
262.21	1.117453	262.21	1.169989	262.21	1.21099	262.21	1.260211	262.21	1.203911	262.21	1.177761	262.21	1.230395	262.21	0.0856778	262.19	-0.06152103	262.19	-0.08693362	262.19	-0.07258683	262.19	-0.07923469	262.19	-0.04935884	262.19	-0.05724597	262.19	-0.05282271	262.19	-0.02177844
262.41	1.116249	262.41	1.172497	262.41	1.215504	262.41	1.26019	262.41	1.200993	262.41	1.17689	262.41	1.230402	262.41	0.08867697	262.39	-0.06115615	262.39	-0.08806551	262.39	-0.07228096	262.39	-0.07873446	262.39	-0.04413778	262.39	-0.05516565	262.39	-0.0473919	262.39	-0.02475469
262.61	1.124413	262.61	1.17658	262.61	1.212453	262.61	1.264529	262.61	1.197101	262.61	1.178751	262.61	1.22977	262.61	0.09158316	262.6	-0.06350674	262.6	-0.08724847	262.6	-0.07180991	262.6	-0.08139502	262.6	-0.0534433	262.6	-0.05696151	262.6	-0.05015365	262.6	-0.0267896
262.81	1.117264	262.81	1.175158	262.81	1.212696	262.81	1.264268	262.81	1.204255	262.81	1.18168	262.81	1.232639	262.81	0.08917918	262.8	-0.06603336	262.8	-0.08534792	262.8	-0.07640973	262.8	-0.08361053	262.8	-0.05288168	262.8	-0.05336564	262.8	-0.04879183	262.8	-0.02493883
263.01	1.11877	263.01	1.171505	263.01	1.212871	263.01	1.26682	263.01	1.205468	263.01	1.179436	263.01	1.233576	263.01	0.08437169	263	-0.05941896	263	-0.08580786	263	-0.07595643	263	-0.07992643	263	-0.04836604	263	-0.05429613	263	-0.0516723	263	-0.02248226
263.21	1.118518	263.21	1.17421	263.21	1.217555	263.21	1.262514	263.21	1.205203	263.21	1.180455	263.21	1.231582	263.21	0.08544017	263.19	-0.06274285	263.19	-0.08890002	263.19	-0.07341548	263.19	-0.07794061	263.19	-0.0470544	263.19	-0.05452466	263.19	-0.0498726	263.19	-0.0218097
263.41	1.119398	263.41	1.174491	263.41	1.214116	263.41	1.263049	263.41	1.202824	263.41	1.18156	263.41	1.23223	263.41	0.09318823	263.4	-0.0616646	263.4	-0.09120856	263.4	-0.07108836	263.4	-0.08621201	263.4	-0.04623782	263.4	-0.05341098	263.4	-0.04686924	263.4	-0.02236768
263.61	1.118282	263.61	1.174654	263.61	1.21481	263.61	1.261133	263.61	1.200093	263.61	1.181993	263.61	1.234613	263.61	0.08800761	263.59	-0.06259794	263.59	-0.08590862	263.59	-0.07478403	263.59	-0.08141366	263.59	-0.04838431	263.59	-0.0570147	263.59	-0.05240247	263.59	-0.02431752
263.81	1.126483	263.81	1.176434	263.81	1.212693	263.81	1.265779	263.81	1.203422	263.81	1.17583	263.81	1.235132	263.81	0.08839913	263.79	-0.05623636	263.79	-0.087053	263.79	-0.07457927	263.79	-0.08469461	263.79	-0.0488896	263.79	-0.05081858	263.79	-0.04720369	263.79	-0.02106654
264.01	1.118805	264.01	1.174058	264.01	1.210504	264.01	1.267041	264.01	1.1983	264.01	1.180823	264.01	1.230449	264.01	0.08820361	263.99	-0.06249663	263.99	-0.08830497	263.99	-0.07758886	263.99	-0.07816192	263.99	-0.04726809	263.99	-0.06017156	263.99	-0.05138857	263.99	-0.02762146
264.21	1.121151	264.21	1.173631	264.21	1.215785	264.21	1.260441	264.21	1.201116	264.21	1.181622	264.21	1.230559	264.21	0.08524814	264.19	-0.058185	264.19	-0.08859238	264.19	-0.07765613	264.19	-0.0783573	264.19	-0.05072348	264.19	-0.05111349	264.19	-0.04691493	264.19	-0.02504335
264.41	1.121589	264.41	1.175327	264.41	1.212818	264.41	1.261135	264.41	1.204662	264.41	1.183522	264.41	1.229149	264.41	0.0911376	264.4	-0.05987027	264.4	-0.0926828	264.4	-0.07606679	264.4	-0.07697988	264.4	-0.04893103	264.4	-0.05470679	264.4	-0.04985685	264.4	-0.02343437
264.61	1.121594	264.61	1.173547	264.61	1.213411	264.61	1.262629	264.61	1.205073	264.61	1.180065	264.61	1.231439	264.61	0.08897813	264.59	-0.05967065	264.59	-0.08733939	264.59	-0.07074297	264.59	-0.08157572	264.59	-0.05034367	264.59	-0.05269085	264.59	-0.04726424	264.59	-0.02447091
264.81	1.119166	264.81	1.172557	264.81	1.215249	264.81	1.259762	264.81	1.202359	264.81	1.182302	264.81	1.232456	264.81	0.08834903	264.8	-0.05827109	264.8	-0.08584882	264.8	-0.07729842	264.8	-0.07300738	264.8	-0.04726959	264.8	-0.05602826	264.8	-0.04617504	264.8	-0.03017289
265.01	1.123534	265.01	1.181936	265.01	1.217537	265.01	1.269003	265.01	1.204504	265.01	1.177249	265.01	1.227484	265.01	0.08560109	264.99	-0.0592534	264.99	-0.08600936	264.99	-0.07071544	264.99	-0.07993658	264.99	-0.0470525	264.99	-0.05252998	264.99	-0.05067541	264.99	-0.0250279
265.21	1.122041	265.21	1.174905	265.21	1.21831	265.21	1.267071	265.21	1.200385	265.21	1.184476	265.21	1.232651	265.21	0.08920562	265.2	-0.05767934	265.2	-0.08628306	265.2	-0.07355764	265.2	-0.07905958	265.2	-0.0454773	265.2	-0.05620362	265.2	-0.04680195	265.2	-0.02481354
265.41	1.120261	265.41	1.172199	265.41	1.214589	265.41	1.261644	265.41	1.200824	265.41	1.181465	265.41	1.23025	265.41	0.08704064	265.39	-0.05849938	265.39	-0.08125465	265.39	-0.0743751	265.39	-0.07886687	265.39	-0.0477773	265.39	-0.05687926	265.39	-0.04604847	265.39	-0.01860846
265.61	1.118517	265.61	1.173145	265.61	1.216012	265.61	1.265437	265.61	1.204584	265.61	1.179297	265.61	1.233108	265.61	0.08955894	265.6	-0.06190168	265.6	-0.08520097	265.6	-0.07285871	265.6	-0.08192939	265.6	-0.04492456	265.6	-0.05523993	265.6	-0.04550582	265.6	-0.02594564
265.81	1.118454	265.81	1.177067	265.81	1.214142	265.81	1.258434	265.81	1.19936	265.81	1.181629	265.81	1.231573	265.81	0.08703903	265.79	-0.06436558	265.79	-0.09314376	265.79	-0.07325984	265.79	-0.08126348	265.79	-0.04925505	265.79	-0.05712721	265.79	-0.04584995	265.79	-0.02434959
266.01	1.116092	266.01	1.180324	266.01	1.215914	266.01	1.265983	266.01	1.201291	266.01	1.179672	266.01	1.229307	266.01	0.08734201	266.01	-0.060312	266.01	-0.08598483	266.01	-0.06913014	266.01	-0.07754722	266.01	-0.04874158	266.01	-0.05315549	266.01	-0.04607725	266.01	-0.02715832
266.21	1.116973	266.21	1.177559	266.21	1.215416	266.21	1.264849	266.21	1.200786	266.21	1.184041	266.21	1.232549	266.21	0.08898851	266.19	-0.05690365	266.19	-0.08596854	266.19	-0.07622094	266.19	-0.07939663	266.19	-0.04462706	266.19	-0.05397728	266.19	-0.04575117	266.19	-0.02226072
266.41	1.121744	266.41	1.175991	266.41	1.214928	266.41	1.265554	266.41	1.203114	266.41	1.180941	266.41	1.230408	266.41	0.09121529	266.39	-0.0569862	266.39	-0.082813	266.39	-0.07419627	266.39	-0.08046845	266.39	-0.04552138	266.39	-0.05323287	266.39	-0.04769186	266.39	-0.02164211
266.61	1.12364	266.61	1.172614	266.61	1.219783	266.61	1.262956	266.61	1.20327	266.61	1.177259	266.61	1.231578	266.61	0.09141698	266.6	-0.05772977	266.6	-0.08428333	266.6	-0.06873846	266.6	-0.07550713	266.6	-0.05100491	266.6	-0.05749128	266.6	-0.04140652	266.6	-0.02415184
266.81	1.113892	266.81	1.18092	266.81	1.215829	266.81	1.263496	266.81	1.202799	266.81	1.176766	266.81	1.228043	266.81	0.08600213	266.79	-0.05645445	266.79	-0.08888295	266.79	-0.07210283	266.79	-0.07905434	266.79	-0.04463513	266.79	-0.04843502	266.79	-0.04521485	266.79	-0.02296615
267.01	1.114779	267.01	1.173283	267.01	1.216058	267.01	1.267824	267.01	1.203866	267.01	1.185038	267.01	1.23046	267.01	0.08631766	266.99	-0.06144502	266.99	-0.08987782	266.99	-0.07706363	266.99	-0.07425465	266.99	-0.04565186	266.99	-0.05531894	266.99	-0.04451833	266.99	-0.02365272
267.21	1.122119	267.21	1.17581	267.21	1.217173	267.21	1.264795	267.21	1.202546	267.21	1.186585	267.21	1.232621	267.21	0.09027815	267.19	-0.05869513	267.19	-0.09072232	267.19	-0.0751192	267.19	-0.08084124	267.19	-0.04404296	267.19	-0.05487806	267.19	-0.04924466	267.19	-0.02319292
267.41	1.119542	267.41	1.173062	267.41	1.220787	267.41	1.265137	267.41	1.204183	267.41	1.183392	267.41	1.236651	267.41	0.09456342	267.39	-0.06180541	267.39	-0.08673997	267.39	-0.07426848	267.39	-0.08322603	267.39	-0.04629024	267.39	-0.05355402	267.39	-0.04695661	267.39	-0.02318004
267.61	1.12474	267.61	1.173538	267.61	1.216025	267.61	1.266308	267.61	1.204148	267.61	1.184212	267.61	1.233635	267.61	0.09315301	267.59	-0.05892139	267.59	-0.08523239	267.59	-0.07417674	267.59	-0.08127481	267.59	-0.04594164	267.59	-0.05369603	267.59	-0.04743142	267.59	-0.02338509
267.81	1.116992	267.81	1.174902	267.81	1.213693	267.81	1.262306	267.81	1.199291	267.81	1.180246	267.81	1.23028	267.81	0.09303414	267.8	-0.05808996	267.8	-0.08661248	267.8	-0.07222494	267.8	-0.07608413	267.8	-0.04507051	267.8	-0.05406681	267.8	-0.04803122	267.8	-0.02206138
268.01	1.12134	268.01	1.173318	268.01	1.214805	268.01	1.268057	268.01	1.203402	268.01	1.178987	268.01	1.232937	268.01	0.0892284	267.99	-0.05668914	267.99	-0.082722	267.99	-0.07165333	267.99	-0.07580642	267.99	-0.04967117	267.99	-0.05640231	267.99	-0.04688545	267.99	-0.02287424
268.21	1.123755	268.21	1.17458	268.21	1.213693	268.21	1.26418	268.21	1.206083	268.21	1.180578	268.21	1.231954	268.21	0.09239418	268.19	-0.06185247	268.19	-0.08839761	268.19	-0.06955672	268.19	-0.08327655	268.19	-0.04270754	268.19	-0.05062307	268.19	-0.04830601	268.19	-0.02327912
268.41	1.121261	268.41	1.177086	268.41	1.221618	268.41	1.263766	268.41	1.202165	268.41	1.183378	268.41	1.231431	268.41	0.09011912	268.39	-0.05846925	268.39	-0.08759132	268.39	-0.07322693	268.39	-0.07731438	268.39	-0.05005189	268.39	-0.05172038	268.39	-0.04952357	268.39	-0.02655226
268.61	1.122118	268.61	1.17369	268.61	1.218249	268.61	1.26559	268.61	1.202338	268.61	1.184139	268.61	1.234554	268.61	0.08815217	268.6	-0.06213921	268.6	-0.08919267	268.6	-0.07362694	268.6	-0.07926834	268.6	-0.04830102	268.6	-0.0533723	268.6	-0.04392662	268.6	-0.02252623
268.81	1.11963	268.81	1.179179	268.81	1.217279	268.81	1.264513	268.81	1.20465	268.81	1.180831	268.81	1.233886	268.81	0.0879298	268.8	-0.05774053	268.8	-0.08682039	268.8	-0.0697689	268.8	-0.07589372	268.8	-0.04730931	268.8	-0.0523923	268.8	-0.04744542	268.8	-0.02221751
269.01	1.124845	269.01	1.176533	269.01	1.213458	269.01	1.2624	269.01	1.203854	269.01	1.183746	269.01	1.237338	269.01	0.09358246	269	-0.06150528	269	-0.08731598	269	-0.07095698	269	-0.08190546	269	-0.04672866	269	-0.05311524	269	-0.04461519	269	-0.02442353
269.21	1.120139	269.21	1.172112	269.21	1.218374	269.21	1.266262	269.21	1.207441	269.21	1.183111	269.21	1.233207	269.21	0.09121946	269.19	-0.06002326	269.19	-0.08711315	269.19	-0.07268328	269.19	-0.07166041	269.19	-0.0492188	269.19	-0.05320961	269.19	-0.04588658	269.19	-0.02024462
269.41	1.120469	269.41	1.179966	269.41	1.21893	269.41	1.26695	269.41	1.204739	269.41	1.181942	269.41	1.234034	269.41	0.09189618	269.39	-0.05644225	269.39	-0.09085236	269.39	-0.06865177	269.39	-0.07910173	269.39	-0.04833071	269.39	-0.05279269	269.39	-0.04728515	269.39	-0.02472294
269.61	1.120307	269.61	1.181387	269.61	1.216231	269.61	1.268103	269.61	1.203686	269.61	1.185615	269.61	1.230695	269.61	0.08943992	269.59	-0.05565359	269.59	-0.08212386	269.59	-0.07561634	269.59	-0.07602596	269.59	-0.04844356	269.59	-0.05556927	269.59	-0.04536482	269.59	-0.02630699
269.81	1.119961	269.81	1.171054	269.81	1.216061	269.81	1.267188	269.81	1.204937	269.81	1.185473	269.81	1.233689	269.81	0.08906119	269.8	-0.05717841	269.8	-0.08408946	269.8	-0.07532632	269.8	-0.07831304	269.8	-0.04584964	269.8	-0.05294982	269.8	-0.04775066	269.8	-0.02347886
270.01	1.119802	270.01	1.175949	270.01	1.217255	270.01	1.267997	270.01	1.205917	270.01	1.183761	270.01	1.233696	270.01	0.08848874	269.99	-0.06074979	269.99	-0.0860469	269.99	-0.07662308	269.99	-0.07588028	269.99	-0.0449584	269.99	-0.05391615	269.99	-0.04324781	269.99	-0.02335558
270.21	1.124448	270.21	1.177919	270.21	1.217605	270.21	1.264673	270.21	1.207016	270.21	1.182348	270.21	1.235746	270.21	0.08979525	270.2	-0.05775059	270.2	-0.08529183	270.2	-0.07627933	270.2	-0.08013842	270.2	-0.04739874	270.2	-0.04848341	270.2	-0.04936884	270.2	-0.02454589
270.41	1.122287	270.41	1.178869	270.41	1.218696	270.41	1.266925	270.41	1.209156	270.41	1.185889	270.41	1.233012	270.41	0.08704807	270.39	-0.05929701	270.39	-0.08552108	270.39	-0.06934194	270.39	-0.0800549	270.39	-0.0467968	270.39	-0.05119357	270.39	-0.04603395	270.39	-0.02304087
270.61	1.119957	270.61	1.179775	270.61	1.217024	270.61	1.267722	270.61	1.205125	270.61	1.182248	270.61	1.236834	270.61	0.09260345	270.59	-0.06261106	270.59	-0.08968314	270.59	-0.07477219	270.59	-0.07621465	270.59	-0.04491935	270.59	-0.05071189	270.59	-0.04257024	270.59	-0.02090257
270.81	1.12377	270.81	1.17754	270.81	1.215672	270.81	1.263689	270.81	1.204724	270.81	1.18269	270.81	1.234183	270.81	0.08917286	270.8	-0.063315	270.8	-0.08765429	270.8	-0.07284819	270.8	-0.07537921	270.8	-0.04620012	270.8	-0.0522017	270.8	-0.04036347	270.8	-0.02357752
271.01	1.120512	271.01	1.16997	271.01	1.21611	271.01	1.265482	271.01	1.208119	271.01	1.184427	271.01	1.23359	271.01	0.09334257	270.99	-0.05276658	270.99	-0.08306298	270.99	-0.07038175	270.99	-0.07655139	270.99	-0.04369406	270.99	-0.04983234	270.99	-0.04681953	270.99	-0.02424755
271.21	1.122266	271.21	1.178102	271.21	1.213102	271.21	1.26854	271.21	1.201403	271.21	1.183287	271.21	1.231932	271.21	0.09429777	271.19	-0.05814832	271.19	-0.08356871	271.19	-0.07200501	271.19	-0.07554154	271.19	-0.04536238	271.19	-0.05531252	271.19	-0.04595364	271.19	-0.02266349
271.41	1.120458	271.41	1.175822	271.41	1.220093	271.41	1.267789	271.41	1.2065	271.41	1.185202	271.41	1.233527	271.41	0.08727632	271.39	-0.05784769	271.39	-0.08384161	271.39	-0.07067701	271.39	-0.07594757	271.39	-0.04642041	271.39	-0.05690021	271.39	-0.04615252	271.39	-0.02048469
271.61	1.124503	271.61	1.179235	271.61	1.217107	271.61	1.2671	271.61	1.206006	271.61	1.181964	271.61	1.234934	271.61	0.09322806	271.59	-0.05604178	271.59	-0.08336844	271.59	-0.07366589	271.59	-0.07790188	271.59	-0.04466503	271.59	-0.05338512	271.59	-0.04724877	271.59	-0.02626886
271.81	1.117722	271.81	1.183904	271.81	1.215936	271.81	1.272919	271.81	1.209213	271.81	1.183846	271.81	1.235856	271.81	0.09010075	271.79	-0.05757319	271.79	-0.08803155	271.79	-0.07247196	271.79	-0.07472817	271.79	-0.0440104	271.79	-0.05257332	271.79	-0.04876031	271.79	-0.01834757
272.01	1.119161	272.01	1.176803	272.01	1.216711	272.01	1.267522	272.01	1.207462	272.01	1.18584	272.01	1.233392	272.01	0.09247008	272	-0.05775068	272	-0.08550275	272	-0.0713673	272	-0.07712047	272	-0.04677897	272	-0.05187587	272	-0.04388566	272	-0.01729874
272.21	1.120804	272.21	1.182165	272.21	1.221255	272.21	1.265927	272.21	1.206384	272.21	1.178382	272.21	1.233115	272.21	0.09337655	272.2	-0.05828596	272.2	-0.08489986	272.2	-0.0694328	272.2	-0.07709935	272.2	-0.04176793	272.2	-0.05334845	272.2	-0.04529962	272.2	-0.02078285
272.41	1.123075	272.41	1.181393	272.41	1.217587	272.41	1.267738	272.41	1.20582	272.41	1.180831	272.41	1.234657	272.41	0.09056848	272.39	-0.05543569	272.39	-0.08734468	272.39	-0.07330526	272.39	-0.07891423	272.39	-0.04738989	272.39	-0.05165249	272.39	-0.04298823	272.39	-0.01886448
272.61	1.125296	272.61	1.178069	272.61	1.216306	272.61	1.268804	272.61	1.201635	272.61	1.184593	272.61	1.235046	272.61	0.09293544	272.59	-0.05804659	272.59	-0.08504456	272.59	-0.07276429	272.59	-0.0765595	272.59	-0.04415894	272.59	-0.05283019	272.59	-0.04352522	272.59	-0.02152313
272.81	1.116798	272.81	1.178012	272.81	1.218668	272.81	1.268864	272.81	1.202831	272.81	1.18256	272.81	1.233452	272.81	0.09072223	272.8	-0.06117345	272.8	-0.08542082	272.8	-0.07231007	272.8	-0.07506757	272.8	-0.04735618	272.8	-0.05132834	272.8	-0.04373866	272.8	-0.01461952
273.01	1.121511	273.01	1.182475	273.01	1.219999	273.01	1.267434	273.01	1.205023	273.01	1.185151	273.01	1.234123	273.01	0.09644935	272.99	-0.05482304	272.99	-0.08329374	272.99	-0.06700705	272.99	-0.07723136	272.99	-0.04269416	272.99	-0.05024834	272.99	-0.04640169	272.99	-0.01934517
273.21	1.121139	273.21	1.177811	273.21	1.222796	273.21	1.270623	273.21	1.206904	273.21	1.178891	273.21	1.229645	273.21	0.09282625	273.19	-0.05578359	273.19	-0.08229852	273.19	-0.07003089	273.19	-0.07885291	273.19	-0.04436952	273.19	-0.05185004	273.19	-0.04523497	273.19	-0.02062639
273.41	1.120493	273.41	1.184595	273.41	1.216893	273.41	1.265814	273.41	1.207631	273.41	1.19054	273.41	1.231371	273.41	0.08803227	273.4	-0.05650668	273.4	-0.0835592	273.4	-0.07177233	273.4	-0.07509541	273.4	-0.04672573	273.4	-0.04947723	273.4	-0.04468879	273.4	-0.02394027
273.61	1.122339	273.61	1.174595	273.61	1.222238	273.61	1.265129	273.61	1.209378	273.61	1.185405	273.61	1.234896	273.61	0.09452454	273.59	-0.05740269	273.59	-0.08283117	273.59	-0.0680766	273.59	-0.0766981	273.59	-0.04702654	273.59	-0.04992496	273.59	-0.04629413	273.59	-0.02250873
273.81	1.125309	273.81	1.180962	273.81	1.218681	273.81	1.26708	273.81	1.205739	273.81	1.181839	273.81	1.233234	273.81	0.09099256	273.8	-0.05836338	273.8	-0.08206874	273.8	-0.0714037	273.8	-0.08204354	273.8	-0.04460402	273.8	-0.05063006	273.8	-0.04735713	273.8	-0.01699953
274.01	1.121303	274.01	1.178021	274.01	1.217255	274.01	1.268209	274.01	1.206277	274.01	1.187774	274.01	1.234421	274.01	0.09089709	273.99	-0.06267872	273.99	-0.0862949	273.99	-0.06741762	273.99	-0.07713711	273.99	-0.04598499	273.99	-0.05196834	273.99	-0.04557405	273.99	-0.01785607
274.21	1.121512	274.21	1.176628	274.21	1.22257	274.21	1.271854	274.21	1.209804	274.21	1.190681	274.21	1.237014	274.21	0.08834831	274.2	-0.05576966	274.2	-0.08255234	274.2	-0.07429618	274.2	-0.07374847	274.2	-0.04672856	274.2	-0.05365615	274.2	-0.04666945	274.2	-0.0230278
274.41	1.122567	274.41	1.176896	274.41	1.219342	274.41	1.27116	274.41	1.202348	274.41	1.186637	274.41	1.23966	274.41	0.09245109	274.4	-0.05519024	274.4	-0.0871298	274.4	-0.06923786	274.4	-0.07520135	274.4	-0.04627631	274.4	-0.05037038	274.4	-0.04292632	274.4	-0.02390686
274.61	1.124902	274.61	1.17948	274.61	1.217416	274.61	1.267322	274.61	1.206855	274.61	1.181643	274.61	1.233981	274.61	0.09027121	274.6	-0.05835328	274.6	-0.08090637	274.6	-0.07076887	274.6	-0.07381078	274.6	-0.04249308	274.6	-0.04936288	274.6	-0.04630506	274.6	-0.02138055
274.81	1.123167	274.81	1.181602	274.81	1.215374	274.81	1.267539	274.81	1.206273	274.81	1.184849	274.81	1.236556	274.81	0.09204885	274.79	-0.05989591	274.79	-0.08335442	274.79	-0.07579581	274.79	-0.07814389	274.79	-0.04410941	274.79	-0.05229474	274.79	-0.04362949	274.79	-0.02073212
275.01	1.121528	275.01	1.182218	275.01	1.220755	275.01	1.267369	275.01	1.207243	275.01	1.190689	275.01	1.23154	275.01	0.0936525	275	-0.05465287	275	-0.08356756	275	-0.07201716	275	-0.07933031	275	-0.04490895	275	-0.04983626	275	-0.04495387	275	-0.0244317
275.21	1.122017	275.21	1.177091	275.21	1.218539	275.21	1.264908	275.21	1.211024	275.21	1.183957	275.21	1.234093	275.21	0.089316	275.2	-0.05307836	275.2	-0.08798966	275.2	-0.06702756	275.2	-0.0771848	275.2	-0.04681019	275.2	-0.04853325	275.2	-0.04362687	275.2	-0.02034412
275.41	1.123871	275.41	1.178817	275.41	1.221956	275.41	1.264036	275.41	1.208499	275.41	1.184085	275.41	1.237519	275.41	0.0911783	275.39	-0.05556533	275.39	-0.08400491	275.39	-0.07450175	275.39	-0.07490045	275.39	-0.0421415	275.39	-0.04981908	275.39	-0.04575658	275.39	-0.02240402
275.61	1.126627	275.61	1.176177	275.61	1.222282	275.61	1.270863	275.61	1.207426	275.61	1.185539	275.61	1.232287	275.61	0.09230018	275.59	-0.05806485	275.59	-0.08817462	275.59	-0.06903004	275.59	-0.0718881	275.59	-0.04413373	275.59	-0.0518728	275.59	-0.0441183	275.59	-0.02303582
275.81	1.123986	275.81	1.17705	275.81	1.214091	275.81	1.268785	275.81	1.202919	275.81	1.185775	275.81	1.229127	275.81	0.09498202	275.79	-0.0584657	275.79	-0.08065616	275.79	-0.0710602	275.79	-0.07524907	275.79	-0.03989822	275.79	-0.05649766	275.79	-0.04582462	275.79	-0.02120727
276.01	1.123166	276.01	1.177029	276.01	1.220889	276.01	1.268659	276.01	1.204267	276.01	1.183523	276.01	1.23956	276.01	0.09364558	275.99	-0.05538213	275.99	-0.08288737	275.99	-0.06451554	275.99	-0.07556815	275.99	-0.04529235	275.99	-0.05413033	275.99	-0.04271843	275.99	-0.01807189
276.21	1.128433	276.21	1.179824	276.21	1.218208	276.21	1.266138	276.21	1.210216	276.21	1.188172	276.21	1.237749	276.21	0.09137841	276.19	-0.05737551	276.19	-0.0806419	276.19	-0.06919063	276.19	-0.07687701	276.19	-0.04053583	276.19	-0.05491302	276.19	-0.0446555	276.19	-0.02424699
276.41	1.12438	276.41	1.180953	276.41	1.220317	276.41	1.266601	276.41	1.20633	276.41	1.184639	276.41	1.236158	276.41	0.08795226	276.4	-0.0597234	276.4	-0.08594465	276.4	-0.06831522	276.4	-0.07450283	276.4	-0.04371991	276.4	-0.0510474	276.4	-0.04733552	276.4	-0.02216922
276.61	1.130002	276.61	1.176471	276.61	1.220864	276.61	1.271678	276.61	1.208449	276.61	1.18761	276.61	1.237043	276.61	0.08836093	276.59	-0.05590063	276.59	-0.08325685	276.59	-0.07322176	276.59	-0.07420779	276.59	-0.04502103	276.59	-0.05110478	276.59	-0.04466984	276.59	-0.02271446
276.81	1.12501	276.81	1.178116	276.81	1.220081	276.81	1.269179	276.81	1.211171	276.81	1.188848	276.81	1.234094	276.81	0.09721956	276.79	-0.0521083	276.79	-0.08303578	276.79	-0.06705972	276.79	-0.07707515	276.79	-0.04048046	276.79	-0.04913241	276.79	-0.04335828	276.79	-0.0227276
277.01	1.121598	277.01	1.178283	277.01	1.223135	277.01	1.268915	277.01	1.209751	277.01	1.190425	277.01	1.235403	277.01	0.09095152	277	-0.05637933	277	-0.08470163	277	-0.07534423	277	-0.07475257	277	-0.04311887	277	-0.05384088	277	-0.04448894	277	-0.01685336
277.21	1.125912	277.21	1.18051	277.21	1.219421	277.21	1.272392	277.21	1.204765	277.21	1.184665	277.21	1.239243	277.21	0.08914342	277.2	-0.05583509	277.2	-0.0779218	277.2	-0.06469823	277.2	-0.07585441	277.2	-0.04193832	277.2	-0.05034064	277.2	-0.04756334	277.2	-0.01956297
277.41	1.122281	277.41	1.183061	277.41	1.219405	277.41	1.271584	277.41	1.207946	277.41	1.188437	277.41	1.237442	277.41	0.09389256	277.4	-0.05139919	277.4	-0.08146799	277.4	-0.07034089	277.4	-0.07490905	277.4	-0.04476816	277.4	-0.05148592	277.4	-0.04209907	277.4	-0.01941671
277.61	1.121746	277.61	1.175538	277.61	1.224974	277.61	1.269346	277.61	1.206607	277.61	1.188885	277.61	1.233503	277.61	0.09034421	277.59	-0.05842396	277.59	-0.08326424	277.59	-0.07151777	277.59	-0.07994493	277.59	-0.04332507	277.59	-0.04713376	277.59	-0.04514557	277.59	-0.01886151
277.81	1.123536	277.81	1.181951	277.81	1.220477	277.81	1.273027	277.81	1.206389	277.81	1.183945	277.81	1.237391	277.81	0.09377807	277.79	-0.05756342	277.79	-0.08100659	277.79	-0.07131516	277.79	-0.07282037	277.79	-0.04255391	277.79	-0.05030973	277.79	-0.04286508	277.79	-0.01850345
278.01	1.126129	278.01	1.181158	278.01	1.215165	278.01	1.269133	278.01	1.209259	278.01	1.186237	278.01	1.239121	278.01	0.09352935	278	-0.05293187	278	-0.08119942	278	-0.06929611	278	-0.06900671	278	-0.04275503	278	-0.04910612	278	-0.04391822	278	-0.01956572
278.21	1.124885	278.21	1.17954	278.21	1.219412	278.21	1.271009	278.21	1.205763	278.21	1.187998	278.21	1.236276	278.21	0.09152352	278.2	-0.05841836	278.2	-0.08025709	278.2	-0.070613	278.2	-0.07416479	278.2	-0.04497134	278.2	-0.05331767	278.2	-0.04257081	278.2	-0.01982149
278.41	1.121467	278.41	1.182727	278.41	1.218001	278.41	1.270689	278.41	1.212972	278.41	1.190547	278.41	1.232923	278.41	0.09077167	278.39	-0.06280649	278.39	-0.0816563	278.39	-0.07095002	278.39	-0.07452556	278.39	-0.039253	278.39	-0.0477727	278.39	-0.04646934	278.39	-0.02496564
278.61	1.12853	278.61	1.182337	278.61	1.220711	278.61	1.270919	278.61	1.21048	278.61	1.185472	278.61	1.234289	278.61	0.09080791	278.6	-0.05921527	278.6	-0.08444048	278.6	-0.07135005	278.6	-0.0736369	278.6	-0.04077116	278.6	-0.0474513	278.6	-0.04830292	278.6	-0.01753587
278.81	1.122445	278.81	1.179702	278.81	1.221101	278.81	1.271674	278.81	1.208225	278.81	1.188824	278.81	1.237554	278.81	0.09260551	278.8	-0.05556332	278.8	-0.07933229	278.8	-0.07115024	278.8	-0.07815594	278.8	-0.04211937	278.8	-0.05288236	278.8	-0.04471758	278.8	-0.0205523
279.01	1.122941	279.01	1.182198	279.01	1.222137	279.01	1.270586	279.01	1.208661	279.01	1.188885	279.01	1.23694	279.01	0.0967567	279	-0.0588046	279	-0.07977346	279	-0.07103977	279	-0.07167161	279	-0.04008783	279	-0.04706796	279	-0.04433566	279	-0.02348089
279.21	1.129363	279.21	1.184238	279.21	1.220049	279.21	1.271434	279.21	1.21005	279.21	1.192556	279.21	1.241124	279.21	0.09123205	279.19	-0.05310936	279.19	-0.08190906	279.19	-0.06965312	279.19	-0.07841705	279.19	-0.04209608	279.19	-0.053028	279.19	-0.03918086	279.19	-0.02083673
279.41	1.126495	279.41	1.17847	279.41	1.217989	279.41	1.271471	279.41	1.206782	279.41	1.191293	279.41	1.24104	279.41	0.09461223	279.39	-0.05378618	279.39	-0.0778371	279.39	-0.06593865	279.39	-0.07539922	279.39	-0.04115105	279.39	-0.0508838	279.39	-0.04430958	279.39	-0.01928236
279.61	1.123106	279.61	1.18052	279.61	1.218652	279.61	1.265902	279.61	1.208957	279.61	1.188989	279.61	1.237245	279.61	0.09085993	279.59	-0.05563662	279.59	-0.07991166	279.59	-0.07055504	279.59	-0.07493587	279.59	-0.04216264	279.59	-0.0510724	279.59	-0.0453473	279.59	-0.02202296
279.81	1.128969	279.81	1.180243	279.81	1.217361	279.81	1.277471	279.81	1.210704	279.81	1.189692	279.81	1.238384	279.81	0.09313635	279.8	-0.05173369	279.8	-0.08185388	279.8	-0.06741284	279.8	-0.07916511	279.8	-0.04052719	279.8	-0.04489505	279.8	-0.04091318	279.8	-0.02230203
280.01	1.129732	280.01	1.182589	280.01	1.220099	280.01	1.271866	280.01	1.211032	280.01	1.190705	280.01	1.239664	280.01	0.09343385	280	-0.05787171	280	-0.0830477	280	-0.06846031	280	-0.07729212	280	-0.04136276	280	-0.04795659	280	-0.03681538	280	-0.02068995
280.21	1.129446	280.21	1.182553	280.21	1.225973	280.21	1.269983	280.21	1.206928	280.21	1.188089	280.21	1.239642	280.21	0.09188653	280.2	-0.05792024	280.2	-0.08263214	280.2	-0.06733567	280.2	-0.07314983	280.2	-0.04227176	280.2	-0.04689233	280.2	-0.04577236	280.2	-0.01957553
280.41	1.12245	280.41	1.178406	280.41	1.224057	280.41	1.271574	280.41	1.208951	280.41	1.183884	280.41	1.236485	280.41	0.09310162	280.39	-0.05670178	280.39	-0.07758442	280.39	-0.07003167	280.39	-0.07399945	280.39	-0.03850229	280.39	-0.05109363	280.39	-0.04098522	280.39	-0.02096721
280.61	1.128713	280.61	1.177883	280.61	1.2235	280.61	1.270537	280.61	1.210539	280.61	1.187079	280.61	1.236085	280.61	0.09572214	280.6	-0.05412773	280.6	-0.08536555	280.6	-0.06941894	280.6	-0.0648177	280.6	-0.0408105	280.6	-0.05238241	280.6	-0.04320095	280.6	-0.0204518
280.81	1.124368	280.81	1.181817	280.81	1.220511	280.81	1.26875	280.81	1.213409	280.81	1.186383	280.81	1.238955	280.81	0.08953746	280.79	-0.05577252	280.79	-0.08348025	280.79	-0.07190654	280.79	-0.06842825	280.79	-0.04095469	280.79	-0.04752681	280.79	-0.04669784	280.79	-0.02226506
281.01	1.129345	281.01	1.177861	281.01	1.219909	281.01	1.27574	281.01	1.21017	281.01	1.187775	281.01	1.239876	281.01	0.09841387	281	-0.05653793	281	-0.08243226	281	-0.06498297	281	-0.07238513	281	-0.03859212	281	-0.05158842	281	-0.04597031	281	-0.02114275
281.21	1.130034	281.21	1.181895	281.21	1.225391	281.21	1.273516	281.21	1.209649	281.21	1.191275	281.21	1.239871	281.21	0.09414979	281.19	-0.06013228	281.19	-0.08435573	281.19	-0.06633676	281.19	-0.07825981	281.19	-0.04204587	281.19	-0.05375867	281.19	-0.04242737	281.19	-0.02371805
281.41	1.130918	281.41	1.179866	281.41	1.222617	281.41	1.269509	281.41	1.213658	281.41	1.187777	281.41	1.237506	281.41	0.09596722	281.4	-0.05410653	281.4	-0.07957983	281.4	-0.06287872	281.4	-0.07566074	281.4	-0.04170012	281.4	-0.04932347	281.4	-0.04202326	281.4	-0.02256901
281.61	1.126712	281.61	1.180741	281.61	1.220512	281.61	1.272846	281.61	1.209585	281.61	1.183707	281.61	1.236348	281.61	0.09042544	281.6	-0.05353671	281.6	-0.08209123	281.6	-0.06681872	281.6	-0.07351778	281.6	-0.04170088	281.6	-0.04817592	281.6	-0.0419501	281.6	-0.01925309
281.81	1.127104	281.81	1.181826	281.81	1.221098	281.81	1.268099	281.81	1.209744	281.81	1.186989	281.81	1.238742	281.81	0.09574806	281.79	-0.05616374	281.79	-0.07889642	281.79	-0.07150598	281.79	-0.07630755	281.79	-0.04494572	281.79	-0.04984451	281.79	-0.0421752	281.79	-0.01922005
282.01	1.127658	282.01	1.182183	282.01	1.222426	282.01	1.272658	282.01	1.2114	282.01	1.186922	282.01	1.239012	282.01	0.09734428	281.99	-0.05528937	281.99	-0.08440457	281.99	-0.07027687	281.99	-0.07323715	281.99	-0.04444841	281.99	-0.04696082	281.99	-0.04023694	281.99	-0.01873976
282.21	1.121925	282.21	1.178218	282.21	1.221697	282.21	1.273741	282.21	1.212922	282.21	1.192362	282.21	1.242971	282.21	0.09202492	282.19	-0.05551137	282.19	-0.0832655	282.19	-0.06713144	282.19	-0.071377	282.19	-0.0393905	282.19	-0.04716383	282.19	-0.03909605	282.19	-0.01858518
282.41	1.1276	282.41	1.179757	282.41	1.219771	282.41	1.272225	282.41	1.213263	282.41	1.189137	282.41	1.239148	282.41	0.09466415	282.39	-0.05414154	282.39	-0.07917588	282.39	-0.07010982	282.39	-0.07308876	282.39	-0.04309568	282.39	-0.04535714	282.39	-0.04243763	282.39	-0.01863552
282.61	1.126201	282.61	1.181776	282.61	1.218153	282.61	1.270795	282.61	1.206686	282.61	1.185263	282.61	1.239532	282.61	0.09415732	282.59	-0.0533106	282.59	-0.08427779	282.59	-0.06883048	282.59	-0.07633843	282.59	-0.03902823	282.59	-0.04794094	282.59	-0.04199	282.59	-0.02075757
282.81	1.128383	282.81	1.182288	282.81	1.224194	282.81	1.271491	282.81	1.211946	282.81	1.184387	282.81	1.236642	282.81	0.0947833	282.8	-0.05434602	282.8	-0.0827423	282.8	-0.0675338	282.8	-0.07279908	282.8	-0.04183707	282.8	-0.04811684	282.8	-0.03739645	282.8	-0.02230403
283.01	1.126666	283.01	1.18384	283.01	1.221807	283.01	1.27002	283.01	1.214198	283.01	1.19206	283.01	1.240948	283.01	0.0966025	282.99	-0.05596799	282.99	-0.08433571	282.99	-0.06992574	282.99	-0.07230152	282.99	-0.04144731	282.99	-0.04864606	282.99	-0.03831293	282.99	-0.02339719
283.21	1.129179	283.21	1.183221	283.21	1.22194	283.21	1.27358	283.21	1.213471	283.21	1.187814	283.21	1.238123	283.21	0.09531729	283.19	-0.05495484	283.19	-0.08775224	283.19	-0.06764984	283.19	-0.0702024	283.19	-0.04267014	283.19	-0.04963253	283.19	-0.03841241	283.19	-0.01513097
283.41	1.12584	283.41	1.181706	283.41	1.221456	283.41	1.273407	283.41	1.213683	283.41	1.190216	283.41	1.237671	283.41	0.09429426	283.39	-0.05214785	283.39	-0.07967251	283.39	-0.06627785	283.39	-0.07269747	283.39	-0.0397377	283.39	-0.04584733	283.39	-0.04566573	283.39	-0.02044456
283.61	1.125486	283.61	1.183995	283.61	1.220811	283.61	1.270724	283.61	1.214244	283.61	1.186915	283.61	1.235914	283.61	0.09852783	283.6	-0.05307741	283.6	-0.08097841	283.6	-0.0664717	283.6	-0.07200047	283.6	-0.04443347	283.6	-0.04965774	283.6	-0.04133928	283.6	-0.01930021
283.81	1.129127	283.81	1.184918	283.81	1.223036	283.81	1.268479	283.81	1.209591	283.81	1.190218	283.81	1.238606	283.81	0.09466948	283.79	-0.05073148	283.79	-0.08612629	283.79	-0.06897624	283.79	-0.07322915	283.79	-0.04091509	283.79	-0.04658025	283.79	-0.04268105	283.79	-0.02367909
284.01	1.123043	284.01	1.181361	284.01	1.218845	284.01	1.274364	284.01	1.211413	284.01	1.188951	284.01	1.235001	284.01	0.09525523	283.99	-0.05328656	283.99	-0.08019614	283.99	-0.06769571	283.99	-0.07075869	283.99	-0.03765149	283.99	-0.04941953	283.99	-0.04243743	283.99	-0.01744822
284.21	1.126315	284.21	1.180019	284.21	1.223765	284.21	1.27335	284.21	1.212708	284.21	1.190498	284.21	1.24258	284.21	0.09882417	284.19	-0.05342561	284.19	-0.08163349	284.19	-0.06720944	284.19	-0.06966545	284.19	-0.04191367	284.19	-0.0479975	284.19	-0.03939315	284.19	-0.01634301
284.41	1.128596	284.41	1.184548	284.41	1.225181	284.41	1.273304	284.41	1.212529	284.41	1.19145	284.41	1.23934	284.41	0.0933162	284.39	-0.05132048	284.39	-0.08254896	284.39	-0.06646436	284.39	-0.07330948	284.39	-0.0421464	284.39	-0.05043394	284.39	-0.04372176	284.39	-0.02280459
284.61	1.129034	284.61	1.184279	284.61	1.219174	284.61	1.269747	284.61	1.210967	284.61	1.18589	284.61	1.240503	284.61	0.09170033	284.6	-0.05473191	284.6	-0.08210598	284.6	-0.06596038	284.6	-0.07262917	284.6	-0.04033958	284.6	-0.05206693	284.6	-0.04194526	284.6	-0.01993587
284.81	1.129973	284.81	1.18352	284.81	1.223887	284.81	1.270972	284.81	1.211692	284.81	1.189315	284.81	1.238897	284.81	0.09574959	284.8	-0.05193477	284.8	-0.08043721	284.8	-0.06696511	284.8	-0.07304141	284.8	-0.04229018	284.8	-0.0453429	284.8	-0.04401299	284.8	-0.02272009
285.01	1.129414	285.01	1.186728	285.01	1.223429	285.01	1.269425	285.01	1.208527	285.01	1.188131	285.01	1.237701	285.01	0.09577611	285	-0.05445351	285	-0.08246891	285	-0.07045361	285	-0.07206446	285	-0.03988915	285	-0.04940047	285	-0.04514414	285	-0.0193105
285.21	1.127247	285.21	1.180448	285.21	1.224785	285.21	1.273806	285.21	1.212226	285.21	1.18999	285.21	1.243328	285.21	0.09343749	285.19	-0.05020523	285.19	-0.08103918	285.19	-0.06955495	285.19	-0.07629672	285.19	-0.03962895	285.19	-0.04922774	285.19	-0.04350154	285.19	-0.02031147
285.41	1.127582	285.41	1.183258	285.41	1.222884	285.41	1.271727	285.41	1.21178	285.41	1.186603	285.41	1.241818	285.41	0.09549239	285.39	-0.05388141	285.39	-0.07899436	285.39	-0.06841756	285.39	-0.07431173	285.39	-0.04129105	285.39	-0.04724397	285.39	-0.04084034	285.39	-0.01991393
285.61	1.128209	285.61	1.185202	285.61	1.221282	285.61	1.269428	285.61	1.213366	285.61	1.190313	285.61	1.238684	285.61	0.09464993	285.59	-0.05013916	285.59	-0.08059297	285.59	-0.06610338	285.59	-0.07180424	285.59	-0.0392698	285.59	-0.04347689	285.59	-0.04048083	285.59	-0.01711381
285.81	1.130165	285.81	1.184623	285.81	1.223153	285.81	1.272278	285.81	1.214288	285.81	1.190801	285.81	1.241814	285.81	0.09808037	285.79	-0.05734636	285.79	-0.08279101	285.79	-0.06950594	285.79	-0.07108976	285.79	-0.04073841	285.79	-0.04743119	285.79	-0.03826547	285.79	-0.01848679
286.01	1.127554	286.01	1.188802	286.01	1.223355	286.01	1.275189	286.01	1.214101	286.01	1.187036	286.01	1.239528	286.01	0.09324642	286	-0.0519479	286	-0.07959024	286	-0.06753501	286	-0.07315665	286	-0.03997647	286	-0.04745974	286	-0.0413669	286	-0.01852292
286.21	1.129255	286.21	1.183293	286.21	1.222709	286.21	1.26851	286.21	1.212294	286.21	1.18623	286.21	1.244434	286.21	0.09707724	286.19	-0.0543091	286.19	-0.08090879	286.19	-0.07004733	286.19	-0.07374299	286.19	-0.03854415	286.19	-0.04642325	286.19	-0.038222	286.19	-0.01842443
286.41	1.122574	286.41	1.181859	286.41	1.223036	286.41	1.272102	286.41	1.213856	286.41	1.185717	286.41	1.24131	286.41	0.09885959	286.39	-0.06188964	286.39	-0.08124128	286.39	-0.0677601	286.39	-0.07414652	286.39	-0.04074479	286.39	-0.0479488	286.39	-0.03888432	286.39	-0.02416058
286.61	1.127608	286.61	1.181449	286.61	1.2262	286.61	1.270175	286.61	1.213598	286.61	1.190064	286.61	1.235994	286.61	0.09803943	286.59	-0.051787	286.59	-0.07941029	286.59	-0.06630982	286.59	-0.07625076	286.59	-0.03851209	286.59	-0.04842535	286.59	-0.03537288	286.59	-0.01622943
286.81	1.12809	286.81	1.185657	286.81	1.221937	286.81	1.271611	286.81	1.215432	286.81	1.187839	286.81	1.244386	286.81	0.09317339	286.8	-0.05267422	286.8	-0.08346251	286.8	-0.06419019	286.8	-0.07792533	286.8	-0.04013225	286.8	-0.0469531	286.8	-0.0437613	286.8	-0.02038448
287.01	1.125075	287.01	1.181888	287.01	1.222246	287.01	1.271091	287.01	1.215628	287.01	1.188082	287.01	1.244434	287.01	0.09352726	287	-0.05173495	287	-0.08113589	287	-0.06680121	287	-0.07180921	287	-0.04034935	287	-0.04526845	287	-0.0419821	287	-0.02372101
287.21	1.126629	287.21	1.182094	287.21	1.221116	287.21	1.274913	287.21	1.212339	287.21	1.190317	287.21	1.241467	287.21	0.09751499	287.19	-0.05795557	287.19	-0.08056234	287.19	-0.06585337	287.19	-0.0714482	287.19	-0.03810958	287.19	-0.04465555	287.19	-0.04608821	287.19	-0.01698832
287.41	1.126375	287.41	1.18903	287.41	1.221743	287.41	1.273566	287.41	1.21303	287.41	1.193769	287.41	1.239706	287.41	0.09601896	287.39	-0.05247352	287.39	-0.08422573	287.39	-0.06745034	287.39	-0.07376307	287.39	-0.03524198	287.39	-0.04631532	287.39	-0.04069117	287.39	-0.01839267
287.61	1.129661	287.61	1.183723	287.61	1.22339	287.61	1.272057	287.61	1.208506	287.61	1.189238	287.61	1.24437	287.61	0.09133064	287.59	-0.04970423	287.59	-0.08467801	287.59	-0.06253363	287.59	-0.07257857	287.59	-0.0361498	287.59	-0.05311938	287.59	-0.04573313	287.59	-0.02442394
287.81	1.123282	287.81	1.186001	287.81	1.220162	287.81	1.271406	287.81	1.209742	287.81	1.188719	287.81	1.240094	287.81	0.1002479	287.79	-0.05440678	287.79	-0.07586332	287.79	-0.06553595	287.79	-0.07310743	287.79	-0.04142312	287.79	-0.04551475	287.79	-0.04178679	287.79	-0.01311408
288.01	1.128119	288.01	1.178503	288.01	1.224051	288.01	1.268611	288.01	1.214675	288.01	1.189388	288.01	1.240391	288.01	0.09492454	287.99	-0.05483365	287.99	-0.07900651	287.99	-0.06264023	287.99	-0.06915797	287.99	-0.03968148	287.99	-0.0503686	287.99	-0.03682704	287.99	-0.01831581
288.21	1.127398	288.21	1.183054	288.21	1.224385	288.21	1.269033	288.21	1.210074	288.21	1.188704	288.21	1.239157	288.21	0.1008898	288.19	-0.05148077	288.19	-0.08216733	288.19	-0.06471009	288.19	-0.07395868	288.19	-0.03627682	288.19	-0.04426457	288.19	-0.04200215	288.19	-0.01843852
288.41	1.129341	288.41	1.184218	288.41	1.224195	288.41	1.274069	288.41	1.21676	288.41	1.192412	288.41	1.242941	288.41	0.09476488	288.39	-0.05281713	288.39	-0.08014873	288.39	-0.06572913	288.39	-0.06902062	288.39	-0.04001554	288.39	-0.04879764	288.39	-0.03928855	288.39	-0.02072631
288.61	1.127022	288.61	1.188026	288.61	1.227478	288.61	1.267984	288.61	1.211002	288.61	1.19056	288.61	1.239772	288.61	0.09141534	288.59	-0.05708284	288.59	-0.07931183	288.59	-0.06412919	288.59	-0.07317834	288.59	-0.0392178	288.59	-0.04612998	288.59	-0.04111493	288.59	-0.01882204
288.81	1.128942	288.81	1.185278	288.81	1.224463	288.81	1.274437	288.81	1.211705	288.81	1.190466	288.81	1.237386	288.81	0.09786966	288.79	-0.05272868	288.79	-0.07886158	288.79	-0.06749954	288.79	-0.06825548	288.79	-0.04111288	288.79	-0.04484293	288.79	-0.04274474	288.79	-0.01656743
289.03	1.129182	289.03	1.185833	289.03	1.227716	289.03	1.271006	289.03	1.212468	289.03	1.189266	289.03	1.239096	289.03	0.09567767	288.99	-0.05340671	288.99	-0.08223113	288.99	-0.06625881	288.99	-0.07273082	288.99	-0.03743119	288.99	-0.0436749	288.99	-0.04033248	288.99	-0.01892117
289.21	1.126779	289.21	1.181265	289.21	1.226272	289.21	1.276875	289.21	1.209557	289.21	1.193315	289.21	1.242622	289.21	0.09795115	289.2	-0.05081521	289.2	-0.08034241	289.2	-0.06501388	289.2	-0.07278523	289.2	-0.03423691	289.2	-0.04636256	289.2	-0.03867795	289.2	-0.01551124
289.41	1.130282	289.41	1.179246	289.41	1.227752	289.41	1.274078	289.41	1.210824	289.41	1.19107	289.41	1.241865	289.41	0.1013002	289.39	-0.05279576	289.39	-0.07668913	289.39	-0.06975281	289.39	-0.07420452	289.39	-0.0340821	289.39	-0.04744374	289.39	-0.04114778	289.39	-0.01734752
289.61	1.124955	289.61	1.183391	289.61	1.226563	289.61	1.273007	289.61	1.213528	289.61	1.187181	289.61	1.244651	289.61	0.09857115	289.6	-0.05030549	289.6	-0.08132321	289.6	-0.06740411	289.6	-0.07534713	289.6	-0.04203943	289.6	-0.04683248	289.6	-0.0380422	289.6	-0.01601025
289.81	1.127576	289.81	1.191316	289.81	1.224605	289.81	1.270941	289.81	1.214262	289.81	1.191504	289.81	1.23842	289.81	0.09758177	289.8	-0.04937568	289.8	-0.08265202	289.8	-0.067795	289.8	-0.07304576	289.8	-0.0351493	289.8	-0.04672336	289.8	-0.04021057	289.8	-0.01711529
290.01	1.127335	290.01	1.181104	290.01	1.217475	290.01	1.264005	290.01	1.214928	290.01	1.187023	290.01	1.232941	290.01	0.09645009	290	-0.05347486	290	-0.08650659	290	-0.06620282	290	-0.07215121	290	-0.03940215	290	-0.05187869	290	-0.04644091	290	-0.02570393
290.21	1.118107	290.21	1.174762	290.21	1.205716	290.21	1.257949	290.21	1.203061	290.21	1.183041	290.21	1.228098	290.21	0.09852508	290.19	-0.05916361	290.19	-0.09218254	290.19	-0.07106532	290.19	-0.08256529	290.19	-0.04882102	290.19	-0.05196043	290.19	-0.05586682	290.19	-0.02669462
290.41	1.104838	290.41	1.168637	290.41	1.198409	290.41	1.246532	290.41	1.198266	290.41	1.180668	290.41	1.21488	290.41	0.09736913	290.4	-0.07376351	290.4	-0.1009404	290.4	-0.08195523	290.4	-0.08635283	290.4	-0.05394188	290.4	-0.06243612	290.4	-0.06440643	290.4	-0.02127818
290.61	1.10203	290.61	1.160968	290.61	1.193266	290.61	1.239836	290.61	1.189847	290.61	1.174021	290.61	1.208703	290.61	0.09688747	290.59	-0.08165263	290.59	-0.1126752	290.59	-0.09265142	290.59	-0.09165723	290.59	-0.0618797	290.59	-0.06698815	290.59	-0.07403126	290.59	-0.02514737
290.81	1.097008	290.81	1.15176	290.81	1.188657	290.81	1.240421	290.81	1.184957	290.81	1.163398	290.81	1.197698	290.81	0.09653559	290.8	-0.09173664	290.8	-0.1201378	290.8	-0.1016811	290.8	-0.1015248	290.8	-0.06572278	290.8	-0.07219245	290.8	-0.08554243	290.8	-0.02064852
291.01	1.092611	291.01	1.1474	291.01	1.18054	291.01	1.229144	291.01	1.179005	291.01	1.162094	291.01	1.186602	291.01	0.09394296	290.99	-0.1003694	290.99	-0.1275179	290.99	-0.104442	290.99	-0.1031636	290.99	-0.07134056	290.99	-0.0783667	290.99	-0.09409453	290.99	-0.02113757
291.21	1.084929	291.21	1.13834	291.21	1.178056	291.21	1.228261	291.21	1.176643	291.21	1.15144	291.21	1.189747	291.21	0.09886804	291.19	-0.09700139	291.19	-0.1315929	291.19	-0.1094797	291.19	-0.1146952	291.19	-0.07709738	291.19	-0.08414208	291.19	-0.09805305	291.19	-0.01934183
291.41	1.079697	291.41	1.137191	291.41	1.17976	291.41	1.229695	291.41	1.176276	291.41	1.147356	291.41	1.180111	291.41	0.1002079	291.4	-0.1103464	291.4	-0.1285969	291.4	-0.1139676	291.4	-0.1146474	291.4	-0.08053511	291.4	-0.08644582	291.4	-0.1031541	291.4	-0.02334749
291.61	1.077463	291.61	1.13065	291.61	1.176113	291.61	1.226042	291.61	1.171568	291.61	1.14779	291.61	1.177861	291.61	0.09871399	291.6	-0.115354	291.6	-0.1341206	291.6	-0.1132936	291.6	-0.1182241	291.6	-0.07795523	291.6	-0.08936132	291.6	-0.1152769	291.6	-0.02039488
291.81	1.075007	291.81	1.131834	291.81	1.171898	291.81	1.222334	291.81	1.167302	291.81	1.14907	291.81	1.167925	291.81	0.1027697	291.8	-0.117474	291.8	-0.1413589	291.8	-0.1216402	291.8	-0.1224822	291.8	-0.08531747	291.8	-0.09065485	291.8	-0.1252885	291.8	-0.02417534
292.01	1.069767	292.01	1.128221	292.01	1.164625	292.01	1.225037	292.01	1.167273	292.01	1.142021	292.01	1.166977	292.01	0.0959093	291.99	-0.1231864	291.99	-0.1462916	291.99	-0.1241656	291.99	-0.1220609	291.99	-0.08740493	291.99	-0.09728807	291.99	-0.1179557	291.99	-0.01765629
292.21	1.070872	292.21	1.125927	292.21	1.168004	292.21	1.22182	292.21	1.161174	292.21	1.139199	292.21	1.162097	292.21	0.09825701	292.2	-0.1232145	292.2	-0.1461248	292.2	-0.1271684	292.2	-0.1263326	292.2	-0.09002616	292.2	-0.1001888	292.2	-0.1256792	292.2	-0.02090981
292.41	1.068435	292.41	1.128343	292.41	1.17012	292.41	1.222152	292.41	1.166479	292.41	1.14055	292.41	1.162764	292.41	0.09954935	292.39	-0.1251411	292.39	-0.1472803	292.39	-0.1242403	292.39	-0.1295349	292.39	-0.08970876	292.39	-0.09883174	292.39	-0.1268896	292.39	-0.02010989
292.61	1.067413	292.61	1.1218	292.61	1.168779	292.61	1.219524	292.61	1.161349	292.61	1.138398	292.61	1.1563	292.61	0.0957425	292.6	-0.1266558	292.6	-0.146336	292.6	-0.1325295	292.6	-0.1294048	292.6	-0.09067775	292.6	-0.1004927	292.6	-0.1365826	292.6	-0.01820273
292.81	1.069324	292.81	1.120868	292.81	1.16414	292.81	1.218713	292.81	1.157433	292.81	1.140602	292.81	1.159434	292.81	0.09988636	292.79	-0.1298363	292.79	-0.1534397	292.79	-0.1290717	292.79	-0.1279264	292.79	-0.09391892	292.79	-0.1019975	292.79	-0.1349833	292.79	-0.01837951
293.01	1.067473	293.01	1.12413	293.01	1.169227	293.01	1.216203	293.01	1.159909	293.01	1.134281	293.01	1.159573	293.01	0.1011177	293	-0.1333236	293	-0.1576629	293	-0.1308584	293	-0.1342241	293	-0.09526512	293	-0.1041183	293	-0.1366649	293	-0.01507536
293.21	1.066978	293.21	1.12487	293.21	1.164521	293.21	1.21437	293.21	1.158573	293.21	1.135906	293.21	1.153991	293.21	0.09842773	293.19	-0.1289262	293.19	-0.1544632	293.19	-0.1324639	293.19	-0.1301661	293.19	-0.09803453	293.19	-0.1105401	293.19	-0.1377288	293.19	-0.02007249
293.41	1.062028	293.41	1.113546	293.41	1.168112	293.41	1.213016	293.41	1.156765	293.41	1.133269	293.41	1.152975	293.41	0.09925972	293.39	-0.1332141	293.39	-0.1564529	293.39	-0.1324767	293.39	-0.1334289	293.39	-0.09737882	293.39	-0.1049222	293.39	-0.1420858	293.39	-0.01917472
293.61	1.060524	293.61	1.12047	293.61	1.168083	293.61	1.21879	293.61	1.158748	293.61	1.133003	293.61	1.150536	293.61	0.09402411	293.59	-0.1330553	293.59	-0.1528318	293.59	-0.1317503	293.59	-0.1337565	293.59	-0.09331392	293.59	-0.1060766	293.59	-0.1418233	293.59	-0.01617723
293.81	1.06478	293.81	1.118149	293.81	1.166903	293.81	1.217906	293.81	1.15592	293.81	1.132437	293.81	1.148666	293.81	0.1015478	293.79	-0.1311699	293.79	-0.1516896	293.79	-0.1363349	293.79	-0.135394	293.79	-0.09204283	293.79	-0.1084643	293.79	-0.1463045	293.79	-0.01695508
294.01	1.058031	294.01	1.120585	294.01	1.167963	294.01	1.216815	294.01	1.154692	294.01	1.133728	294.01	1.14674	294.01	0.1002118	293.99	-0.1390726	293.99	-0.1523008	293.99	-0.1335973	293.99	-0.1349205	293.99	-0.09852424	293.99	-0.1046343	293.99	-0.1424377	293.99	-0.0121667
294.21	1.060706	294.21	1.119689	294.21	1.165067	294.21	1.219103	294.21	1.158746	294.21	1.128141	294.21	1.144448	294.21	0.1027241	294.2	-0.135523	294.2	-0.1567131	294.2	-0.1342773	294.2	-0.1308964	294.2	-0.09735955	294.2	-0.1093363	294.2	-0.1456587	294.2	-0.01260142
294.41	1.065459	294.41	1.114452	294.41	1.166325	294.41	1.213316	294.41	1.155572	294.41	1.131174	294.41	1.145289	294.41	0.1018997	294.39	-0.1365734	294.39	-0.151678	294.39	-0.1300623	294.39	-0.1374596	294.39	-0.0968448	294.39	-0.109647	294.39	-0.1496889	294.39	-0.01707043
294.61	1.060366	294.61	1.113735	294.61	1.160655	294.61	1.22048	294.61	1.155642	294.61	1.133096	294.61	1.150126	294.61	0.1004832	294.6	-0.1290971	294.6	-0.1549321	294.6	-0.1317676	294.6	-0.1318026	294.6	-0.1004205	294.6	-0.1100966	294.6	-0.1472499	294.6	-0.01499293
294.81	1.06598	294.81	1.118472	294.81	1.165806	294.81	1.219174	294.81	1.157292	294.81	1.132408	294.81	1.143982	294.81	0.1047539	294.79	-0.1315189	294.79	-0.1557764	294.79	-0.133031	294.79	-0.1356311	294.79	-0.10207	294.79	-0.1098294	294.79	-0.1465836	294.79	-0.0155818
295.01	1.062692	295.01	1.114246	295.01	1.161467	295.01	1.21923	295.01	1.151249	295.01	1.134695	295.01	1.148069	295.01	0.1033249	294.99	-0.1380778	294.99	-0.1538023	294.99	-0.1317223	294.99	-0.1352022	294.99	-0.09793419	294.99	-0.1086887	294.99	-0.1489819	294.99	-0.01794297
295.21	1.062968	295.21	1.117235	295.21	1.162108	295.21	1.215448	295.21	1.158014	295.21	1.134004	295.21	1.141671	295.21	0.09857697	295.2	-0.1352238	295.2	-0.1558266	295.2	-0.1339293	295.2	-0.1333336	295.2	-0.1060934	295.2	-0.1073867	295.2	-0.1519266	295.2	-0.01720127
295.41	1.063035	295.41	1.121572	295.41	1.167753	295.41	1.214473	295.41	1.155472	295.41	1.128878	295.41	1.146764	295.41	0.09803076	295.39	-0.1348371	295.39	-0.1537601	295.39	-0.1369757	295.39	-0.1354774	295.39	-0.1009963	295.39	-0.1111493	295.39	-0.1500665	295.39	-0.01656534
295.61	1.060156	295.61	1.11633	295.61	1.163549	295.61	1.217299	295.61	1.160055	295.61	1.132543	295.61	1.144454	295.61	0.1062168	295.59	-0.1333596	295.59	-0.1581796	295.59	-0.1347805	295.59	-0.1290184	295.59	-0.1000752	295.59	-0.1059826	295.59	-0.1504785	295.59	-0.01724016
295.81	1.059189	295.81	1.120349	295.81	1.164443	295.81	1.214722	295.81	1.161151	295.81	1.131208	295.81	1.145037	295.81	0.1055169	295.79	-0.1321962	295.79	-0.1580881	295.79	-0.1332042	295.79	-0.1367863	295.79	-0.09866866	295.79	-0.109272	295.79	-0.1501563	295.79	-0.01462198
296.01	1.059524	296.01	1.118019	296.01	1.166822	296.01	1.219808	296.01	1.160393	296.01	1.131605	296.01	1.144288	296.01	0.09953917	295.99	-0.1381274	295.99	-0.1528072	295.99	-0.1310422	295.99	-0.135335	295.99	-0.09655126	295.99	-0.1064193	295.99	-0.1509111	295.99	-0.01056037
296.21	1.062856	296.21	1.118157	296.21	1.165503	296.21	1.216817	296.21	1.154088	296.21	1.128646	296.21	1.142498	296.21	0.09916236	296.2	-0.1324104	296.2	-0.1519005	296.2	-0.1365377	296.2	-0.1335875	296.2	-0.1014872	296.2	-0.1114028	296.2	-0.1517489	296.2	-0.01378468
296.41	1.05784	296.41	1.117549	296.41	1.16603	296.41	1.214116	296.41	1.154361	296.41	1.131686	296.41	1.144363	296.41	0.1004762	296.39	-0.1317283	296.39	-0.1528352	296.39	-0.1390074	296.39	-0.1312475	296.39	-0.097367	296.39	-0.1088061	296.39	-0.1530218	296.39	-0.01146319
296.61	1.059306	296.61	1.119023	296.61	1.165466	296.61	1.214091	296.61	1.157576	296.61	1.130116	296.61	1.143666	296.61	0.103678	296.59	-0.1386321	296.59	-0.1519361	296.59	-0.1340049	296.59	-0.1314114	296.59	-0.09654531	296.59	-0.1112833	296.59	-0.1469999	296.59	-0.01376535
296.81	1.060716	296.81	1.118958	296.81	1.165108	296.81	1.217624	296.81	1.15606	296.81	1.12948	296.81	1.144085	296.81	0.1038871	296.79	-0.137124	296.79	-0.1564666	296.79	-0.1349971	296.79	-0.1355068	296.79	-0.09915758	296.79	-0.1102977	296.79	-0.1544091	296.79	-0.01327966
297.01	1.059323	297.01	1.117768	297.01	1.165457	297.01	1.217548	297.01	1.159181	297.01	1.132357	297.01	1.14509	297.01	0.1000003	296.99	-0.1345733	296.99	-0.1523716	296.99	-0.1352759	296.99	-0.1359224	296.99	-0.0994243	296.99	-0.1077687	296.99	-0.1504594	296.99	-0.0157863
[truncated: 13,714 more rows]
