# Supplementary material for: Functional development of a V3/glycan-specific broadly neutralizing antibody isolated from a case of HIV superinfection
Source: eLife journal article supplement (doi:10.7554/elife.68110), 2021-07-15
Supplement: fig2-data2 [file RawData0.xls]

A3		B3		C3		D3		E3		F3		G3		H3		A4		B4		C4		D4		E4		F4		G4		H4
0	0	0	0	0	0	0	0	0	0	0	0	0	0	0	0	0	0	0	0	0	0	0	0	0	0	0	0	0	0	0	0
0.2	-0.00300379	0.2	-0.00055477	0.2	0.00108271	0.2	-0.00233975	0.2	0.00067605	0.2	-0.00460839	0.2	0.00498546	0.2	0.00140326	0.2	-0.0023619	0.2	-0.00323379	0.2	0.00576083	0.2	-0.0028086	0.2	0.00032895	0.2	-0.00148037	0.2	0.00026366	0.2	0.00450178
0.4	-0.00494836	0.4	-0.0031864	0.4	0.00115476	0.4	0.00003851	0.4	0.00013729	0.4	-0.00042262	0.4	0.00691161	0.4	0.00510204	0.4	0.00004851	0.4	-0.00189369	0.4	0.00311941	0.4	-0.00004543	0.4	0.00532071	0.4	0.00049012	0.4	0.0013039	0.4	0.00310941
0.6	0.00449548	0.6	-0.00665535	0.6	0.00511157	0.6	0.00168462	0.6	0.00419053	0.6	-0.00659962	0.6	0.00657227	0.6	0.00540032	0.6	-0.00132513	0.6	-0.00232257	0.6	0.00823296	0.6	-0.00226591	0.6	0.00647149	0.6	0.00330789	0.6	0.00298529	0.6	0.00543085
0.8	0.0024038	0.8	0.00185004	0.8	0.00225497	0.8	-0.00413619	0.8	0.00597234	0.8	0.00315335	0.8	0.0058933	0.8	0.00656225	0.8	0.00350852	0.8	-0.00142522	0.8	0.01262061	0.8	-0.00084414	0.8	0.00412534	0.8	0.00044477	0.8	0.00540747	0.8	-0.00052177
1	0.00532224	1	-0.00795871	1	0.00402204	1	-0.00138607	1	0.00268551	1	-0.00052595	1	0.00683031	1	0.00454184	1	-0.00022002	1	-0.00353354	1	0.00266384	1	0.000376	1	0.00453866	1	0.00270751	1	0.00080277	1	0.00410586
1.2	0.00604781	1.2	-0.00332233	1.2	0.00739907	1.2	-0.00170055	1.2	0.00590408	1.2	-0.00212043	1.2	0.00405592	1.2	0.00599484	1.2	0.00298532	1.2	0.00375837	1.2	0.00497965	1.2	0.00338432	1.2	-0.00193762	1.2	-0.00148111	1.2	0.00407204	1.2	0.00433871
1.4	0.00404919	1.4	-0.0020516	1.4	0.00343396	1.4	0.0010875	1.4	0.00100167	1.4	0.00082967	1.4	0.00652277	1.4	0.00434742	1.4	0.00134393	1.4	-0.00295425	1.4	0.0090832	1.4	0.00415292	1.4	0.00278994	1.4	0.00534701	1.4	0.00491784	1.4	0.01176778
1.6	0.00461908	1.6	-0.00456648	1.6	0.00750093	1.6	0.00052883	1.6	0.00629412	1.6	0.00185595	1.6	0.00828669	1.6	0.00569356	1.6	0.00726854	1.6	-0.00464255	1.6	0.00842004	1.6	-0.00104604	1.6	0.00175365	1.6	0.00027974	1.6	0.00158871	1.6	0.00621941
1.8	0.00324401	1.8	-0.00267559	1.8	0.00698529	1.8	0.00502795	1.8	0.00035576	1.8	0.00105672	1.8	0.00939117	1.8	0.0107287	1.8	0.00263504	1.8	-0.00135012	1.8	0.00438592	1.8	0.00005584	1.8	0.00259677	1.8	0.00366238	1.8	0.00525454	1.8	0.00581346
2	0.00981963	2	-0.00027458	2	0.00753279	2	0.00451007	2	0.00525874	2	-0.00204366	2	0.00446077	2	0.01019199	2	0.00572137	2	0.00100575	2	0.0095079	2	0.00379173	2	0.00625603	2	0.00487055	2	0.00512812	2	0.00751308
2.2	0.00494173	2.2	0.00109995	2.2	0.0073761	2.2	0.00365018	2.2	0.00615576	2.2	0.00083638	2.2	0.00712193	2.2	0.00671231	2.2	0.00888967	2.2	-0.00308143	2.2	0.00962838	2.2	0.00322864	2.2	0.00586631	2.2	0.00122315	2.2	0.00311013	2.2	0.00388002
2.4	0.00329188	2.4	-0.00007646	2.4	0.00869071	2.4	0.00289316	2.4	0.0073908	2.4	0.00161087	2.4	0.00955682	2.4	0.0010901	2.4	0.00431186	2.4	0.00021876	2.4	0.01162026	2.4	0.00595257	2.4	0.00937686	2.4	0.00254389	2.4	0.00693757	2.4	0.01201132
2.6	0.00522011	2.6	-0.00310452	2.6	0.00295134	2.6	0.0011459	2.6	0.00370514	2.6	0.00094037	2.6	0.00609867	2.6	0.00754713	2.6	0.0035941	2.6	0.00144654	2.6	0.00847383	2.6	0.00543831	2.6	0.00238709	2.6	0.00107311	2.6	0.00502075	2.6	0.01047
2.8	0.00979103	2.8	-0.00138182	2.8	0.00082706	2.8	0.00229507	2.8	0.00862898	2.8	-0.00021042	2.8	0.0069805	2.8	0.00303478	2.8	0.00777337	2.8	-0.00167641	2.8	0.0037656	2.8	0.00711296	2.8	0.00286067	2.8	0.0027156	2.8	0.00238745	2.8	0.00466357
3	0.00631653	3	-0.00140592	3	0.00774158	3	0.0020771	3	0.01225737	3	-0.00156586	3	0.00564033	3	0.00570929	3	0.0096613	3	0.00183012	3	0.00940393	3	-0.00083199	3	0.00096511	3	0.00636983	3	0.00603681	3	0.01028203
3.2	0.00764654	3.2	0.000247	3.2	0.00503116	3.2	0.00287804	3.2	0.00714207	3.2	0.00072268	3.2	0.00724082	3.2	0.00355298	3.2	0.01031652	3.2	0.00074129	3.2	0.00717804	3.2	-0.00193904	3.2	0.00291963	3.2	0.00362255	3.2	0.00552274	3.2	0.01034395
3.4	0.011337	3.4	0.00091769	3.4	0.00204363	3.4	0.00279398	3.4	0.00780651	3.4	0.00235797	3.4	0.00466321	3.4	0.00737928	3.4	0.00331157	3.4	-0.00194742	3.4	0.00751682	3.4	0.00258219	3.4	0.0062257	3.4	0.0022993	3.4	0.00181979	3.4	0.00515535
3.6	0.00459786	3.6	-0.00021276	3.6	0.00904773	3.6	0.00189851	3.6	0.01048404	3.6	0.00505005	3.6	0.01123908	3.6	0.00644095	3.6	0.00721119	3.6	0.00395776	3.6	0.00702314	3.6	-0.00248495	3.6	0.00512606	3.6	0.00685466	3.6	0.00512956	3.6	0.0089676
3.8	0.00530145	3.8	-0.00117256	3.8	0.01337073	3.8	0.00265519	3.8	0.00772384	3.8	0.00247042	3.8	0.00823634	3.8	0.00530837	3.8	0.00387986	3.8	0.0006369	3.8	0.00822826	3.8	0.00153611	3.8	0.00757398	3.8	0.00230005	3.8	0.00576232	3.8	0.00811274
4	0.00418616	4	-0.00048209	4	0.00613375	4	0.00562322	4	0.00499851	4	0.00495119	4	0.0086697	4	0.00473085	4	0.00641434	4	0.00111144	4	0.00842877	4	0.00178433	4	0.00718435	4	0.00439444	4	0.00128634	4	0.00825018
4.2	0.00432566	4.2	0.00161697	4.2	0.00832328	4.2	0.00439734	4.2	0.00455274	4.2	0.00401629	4.2	0.00611438	4.2	0.00660881	4.2	0.00569964	4.2	0.00434636	4.2	0.01239742	4.2	0.00716428	4.2	0.00584976	4.2	0.00517498	4.2	0.0047134	4.2	0.00746238
4.4	0.00891174	4.4	0.00165519	4.4	0.00597608	4.4	0.00529345	4.4	0.00624056	4.4	0.00419655	4.4	0.00643822	4.4	0.00726611	4.4	0.00500901	4.4	0.00019953	4.4	0.00566818	4.4	-0.00107428	4.4	0.0042032	4.4	0.00261947	4.4	0.00601009	4.4	0.00929639
4.6	0.00420128	4.6	-0.00016041	4.6	0.01221382	4.6	0.00397565	4.6	0.00266512	4.6	0.00631421	4.6	0.00460712	4.6	0.00672877	4.6	0.00589097	4.6	-0.00305454	4.6	0.01488222	4.6	0.00447736	4.6	0.00438736	4.6	0.00251399	4.6	0.00410735	4.6	0.01086046
4.8	0.00361583	4.8	0.00237225	4.8	0.00857276	4.8	0.00632502	4.8	0.00273414	4.8	0.00502416	4.8	0.01169475	4.8	0.00761774	4.8	0.00481464	4.8	-0.00081603	4.8	0.0134303	4.8	-0.00174089	4.8	0.00709275	4.8	0.00614714	4.8	0.00790399	4.8	0.00858313
5	0.00737208	5	-0.00115029	5	0.00476409	5	0.00202954	5	0.00616658	5	0.00371505	5	0.01286711	5	0.00752324	5	0.00824816	5	-0.00092295	5	0.00709331	5	0.00597132	5	0.00527447	5	0.00806874	5	0.00116646	5	0.00584945
5.2	0.00700618	5.2	-0.00003162	5.2	0.00689436	5.2	0.00861657	5.2	0.00765546	5.2	0.00344238	5.2	0.01114452	5.2	0.00574262	5.2	0.00773506	5.2	-0.00033817	5.2	0.00911619	5.2	0.00441831	5.2	0.00868112	5.2	0.00542067	5.2	0.00777722	5.2	0.01333654
5.4	0.00686449	5.4	0.00077996	5.4	0.00605998	5.4	0.0060538	5.4	0.00526334	5.4	0.00393969	5.4	0.00676226	5.4	0.00792628	5.4	0.00386942	5.4	0.00030404	5.4	0.0074027	5.4	0.00442303	5.4	0.00473728	5.4	0.00309607	5.4	0.00242588	5.4	0.0126824
5.6	0.00919835	5.6	0.00160615	5.6	0.00517424	5.6	0.00664353	5.6	0.00384306	5.6	0.00527114	5.6	0.00440992	5.6	0.00710106	5.6	0.01139312	5.6	0.00189911	5.6	0.00892409	5.6	0.0008825	5.6	0.00801461	5.6	0.00380733	5.6	0.00694616	5.6	0.00791642
5.8	0.00903121	5.8	-0.00525719	5.8	0.00924631	5.8	0.00041004	5.8	0.00843067	5.8	0.00288528	5.8	0.00641656	5.8	0.00264707	5.8	0.00815651	5.8	0.00104336	5.8	0.01146995	5.8	0.00239823	5.8	0.00349696	5.8	0.00528695	5.8	0.00491387	5.8	0.00610188
6	0.00925477	6	-0.00049124	6	0.00714412	6	0.00490796	6	0.00616146	6	0.00206036	6	0.01596769	6	0.00471933	6	0.00724008	6	0.00473866	6	0.00965292	6	0.0045186	6	0.00650032	6	0.00252126	6	0.00450642	6	0.00498319
6.2	0.00932503	6.2	-0.00138108	6.2	0.00676427	6.2	0.00538436	6.2	0.0089822	6.2	0.00270553	6.2	0.0092331	6.2	0.00902878	6.2	0.01191819	6.2	-0.00045506	6.2	0.00676475	6.2	0.00549254	6.2	0.00160425	6.2	0.0087056	6.2	0.00265591	6.2	0.01073309
6.4	0.00477885	6.4	0.00046864	6.4	0.00456217	6.4	0.00371819	6.4	0.00277805	6.4	0.00476703	6.4	0.00888842	6.4	0.00563534	6.4	0.00323183	6.4	0.00384704	6.4	0.0114119	6.4	0.00257554	6.4	0.00824349	6.4	0.00796915	6.4	0.00136815	6.4	0.00978118
6.6	0.00147346	6.6	0.00367074	6.6	0.00949292	6.6	0.00498414	6.6	0.00779219	6.6	0.00333709	6.6	0.00864714	6.6	0.00532987	6.6	0.00616892	6.6	-0.00213029	6.6	0.00832586	6.6	0.01033129	6.6	0.00858245	6.6	0.00455733	6.6	0.00459915	6.6	0.01075121
6.8	0.00528778	6.8	0.00428809	6.8	0.00562109	6.8	0.00774349	6.8	0.00691423	6.8	0.00074339	6.8	0.00857137	6.8	0.00725921	6.8	0.00916636	6.8	0.00159894	6.8	0.0082531	6.8	0.00826707	6.8	0.00776427	6.8	0.00483566	6.8	0.00832755	6.8	0.01123124
7	0.00666121	7	0.00168056	7	0.01136479	7	0.00771614	7	0.00439961	7	0.00546216	7	0.00474477	7	0.00704138	7	0.00590019	7	0.0002168	7	0.01136038	7	0.00311476	7	0.00550406	7	0.00152927	7	0.00507499	7	0.00928015
7.2	0.00719145	7.2	-0.00081085	7.2	0.00703288	7.2	0.00663564	7.2	0.00886056	7.2	0.00117607	7.2	0.01276223	7.2	0.00873358	7.2	0.00640951	7.2	0.00038091	7.2	0.01439819	7.2	0.00810878	7.2	0.00203708	7.2	0.00653449	7.2	0.00768536	7.2	0.00687198
7.4	0.00616479	7.4	0.00343232	7.4	0.01161112	7.4	0.0095419	7.4	0.01060605	7.4	0.00256246	7.4	0.01048294	7.4	0.00894537	7.4	0.00619718	7.4	-0.00154032	7.4	0.00949168	7.4	0.00090707	7.4	0.0098902	7.4	0.00538511	7.4	0.00704205	7.4	0.00744231
7.6	0.01037007	7.6	0.00029164	7.6	0.00868521	7.6	0.0061299	7.6	0.00757833	7.6	0.00370597	7.6	0.01119248	7.6	0.00907318	7.6	0.0042988	7.6	0.00043501	7.6	0.00659212	7.6	0.00373522	7.6	0.00950621	7.6	0.00335838	7.6	0.00697039	7.6	0.01136807
7.8	0.00813938	7.8	0.00258149	7.8	0.00662106	7.8	0.00176254	7.8	0.00567248	7.8	0.00123436	7.8	0.0107852	7.8	0.00571608	7.8	0.00575654	7.8	-0.00314134	7.8	0.00993446	7.8	0.0079469	7.8	0.00993566	7.8	0.00673036	7.8	0.00815623	7.8	0.00696934
8	0.00798777	8	0.00386767	8	0.01126305	8	0.00707102	8	0.00525743	8	0.0046669	8	0.0099691	8	0.00723732	8	0.0091641	8	0.00079767	8	0.0099002	8	0.00841979	8	0.00762381	8	0.00344878	8	0.00267883	8	0.01074547
8.2	0.00529764	8.2	-0.00226495	8.2	0.01047376	8.2	0.00815285	8.2	0.01038784	8.2	0.00408609	8.2	0.00901232	8.2	0.00756361	8.2	0.01028588	8.2	0.00227183	8.2	0.01298334	8.2	0.00384059	8.2	0.00852206	8.2	0.00816599	8.2	0.00689348	8.2	0.00736033
8.4	0.00375529	8.4	0.00626274	8.4	0.01191379	8.4	0.00677516	8.4	0.00453038	8.4	0.00516067	8.4	0.00831062	8.4	0.00844566	8.4	0.00428319	8.4	0.00267215	8.4	0.01001586	8.4	0.00204982	8.4	0.00364111	8.4	0.00249672	8.4	0.00350931	8.4	0.01482877
8.6	0.01374201	8.6	0.00565187	8.6	0.00685953	8.6	0.0075474	8.6	0.00233838	8.6	0.00663291	8.6	0.00841234	8.6	0.00811086	8.6	0.00795954	8.6	0.00815505	8.6	0.01429903	8.6	0.00534519	8.6	0.00468018	8.6	0.00835787	8.6	0.00206669	8.6	0.00830922
8.8	0.00683032	8.8	0.00226846	8.8	0.01186628	8.8	0.00852133	8.8	0.00617882	8.8	0.00540572	8.8	0.00802016	8.8	0.00782864	8.8	0.00948575	8.8	0.00420384	8.8	0.01429151	8.8	0.01083122	8.8	0.00552616	8.8	0.00623637	8.8	0.00309834	8.8	0.00901403
9	0.00767412	9	0.00523023	9	0.01034197	9	0.01028055	9	0.0049514	9	0.00238975	9	0.01179389	9	0.0102336	9	0.00567572	9	0.00300909	9	0.01010701	9	0.00549987	9	-0.00021555	9	0.00568559	9	0.00488831	9	0.01282996
9.2	0.00351814	9.2	-0.00093237	9.2	0.01172975	9.2	0.00606658	9.2	0.00925103	9.2	0.0013175	9.2	0.01017688	9.2	0.01164204	9.2	0.00964877	9.2	0.00197085	9.2	0.01501731	9.2	0.00456143	9.2	0.00677823	9.2	0.00972435	9.2	0.00949479	9.2	0.00743339
9.4	0.00978825	9.4	0.00274058	9.4	0.01048024	9.4	0.0104697	9.4	0.00662613	9.4	0.00547796	9.4	0.00890594	9.4	0.00987594	9.4	0.01033453	9.4	0.00014098	9.4	0.00706818	9.4	0.00573768	9.4	0.00980842	9.4	0.00218177	9.4	0.00428126	9.4	0.00884568
9.6	0.00532559	9.6	0.00573991	9.6	0.01013859	9.6	0.00302737	9.6	0.00681403	9.6	0.00792111	9.6	0.00839031	9.6	0.00747655	9.6	0.00698605	9.6	0.00145628	9.6	0.01028957	9.6	0.00284081	9.6	0.00861522	9.6	0.00518398	9.6	0.00723012	9.6	0.00866846
9.8	0.01091389	9.8	0.00606142	9.8	0.00914388	9.8	0.00630319	9.8	0.00546708	9.8	0.00467861	9.8	0.00991118	9.8	0.00929066	9.8	0.00623087	9.8	0.00006683	9.8	0.01150092	9.8	0.00480242	9.8	0.00559176	9.8	0.00646261	9.8	0.00314114	9.8	0.00991495
10	0.01042417	10	0.00414229	10	0.00988555	10	0.0065736	10	0.00786717	10	0.00099171	10	0.00610582	10	0.00856554	10	0.00710155	10	0.00323979	10	0.01101348	10	0.00537009	10	0.0101461	10	0.00467417	10	0.00575969	10	0.00917543
10.2	0.00873796	10.2	0.00710928	10.2	0.00529642	10.2	0.0099587	10.2	0.00864881	10.2	0.00302869	10.2	0.01249289	10.2	0.01008732	10.2	0.01269317	10.2	0.00293734	10.2	0.01062726	10.2	0.0088265	10.2	0.00970683	10.2	0.00053506	10.2	0.00826019	10.2	0.01070624
10.4	0.00714954	10.4	0.00164393	10.4	0.00743373	10.4	0.00360966	10.4	0.00707357	10.4	0.00537623	10.4	0.00839362	10.4	0.01004559	10.4	0.00632889	10.4	0.00398067	10.4	0.00827642	10.4	0.00710527	10.4	0.00651606	10.4	0.00679396	10.4	0.00427015	10.4	0.00999287
10.6	0.00589597	10.6	0.00467734	10.6	0.00494973	10.6	0.01392273	10.6	0.00385042	10.6	0.00265913	10.6	0.01016376	10.6	0.00810636	10.6	0.00773288	10.6	0.00350781	10.6	0.01469962	10.6	0.00558359	10.6	0.00877104	10.6	0.00273445	10.6	0.00557987	10.6	0.00985052
10.8	0.00804466	10.8	0.00028589	10.8	0.00918746	10.8	0.00723987	10.8	0.002679	10.8	-0.00112623	10.8	0.00847114	10.8	0.0055448	10.8	0.00505589	10.8	0.00306593	10.8	0.01092052	10.8	0.00519398	10.8	0.00622488	10.8	0.00702093	10.8	0.00684359	10.8	0.01228357
11	0.00599047	11	0.00107965	11	0.01136311	11	0.01027396	11	0.00384785	11	0.00494548	11	0.00933577	11	0.00386112	11	0.00517465	11	0.00563763	11	0.01176129	11	0.0044043	11	0.00547395	11	0.00591032	11	0.00719926	11	0.00897595
11.2	0.0097302	11.2	0.00152743	11.2	0.0061718	11.2	0.00998828	11.2	0.00444957	11.2	0.0030131	11.2	0.00684245	11.2	0.00822525	11.2	0.00386746	11.2	0.00552686	11.2	0.01171069	11.2	0.00949602	11.2	0.01133242	11.2	0.00849436	11.2	0.00911003	11.2	0.01223511
11.4	0.00531685	11.4	0.00405008	11.4	0.01259553	11.4	0.0100398	11.4	0.00668917	11.4	0.00485957	11.4	0.01037549	11.4	0.00477713	11.4	0.00698342	11.4	0.00447937	11.4	0.00894674	11.4	0.00608637	11.4	0.00569375	11.4	0.00319246	11.4	0.00792398	11.4	0.00925793
11.6	0.00980165	11.6	0.00430654	11.6	0.00894684	11.6	0.00565607	11.6	0.00365607	11.6	0.00554751	11.6	0.00894831	11.6	0.00791555	11.6	0.01186221	11.6	0.00059643	11.6	0.011345	11.6	0.00762773	11.6	0.00982194	11.6	0.00929707	11.6	0.00493065	11.6	0.01046354
11.8	0.01020895	11.8	0.00818971	11.8	0.00843424	11.8	0.01257361	11.8	0.00464794	11.8	0.00358232	11.8	0.00776959	11.8	0.00563455	11.8	0.00774536	11.8	0.00149804	11.8	0.01074154	11.8	0.00036741	11.8	0.01133167	11.8	0.00366154	11.8	0.00873723	11.8	0.01349652
12	0.00617325	12	0.003944	12	0.00488305	12	0.00849164	12	0.00381239	12	0.00195969	12	0.00899139	12	0.00691814	12	0.01093284	12	0.0038189	12	0.01126706	12	0.00883836	12	0.00705339	12	0.00733184	12	0.00642947	12	0.00687356
12.2	0.00627587	12.2	0.00095883	12.2	0.01126752	12.2	0.01298856	12.2	0.00644001	12.2	0.00442998	12.2	0.00893241	12.2	0.00925733	12.2	0.00864721	12.2	0.00532669	12.2	0.0085972	12.2	0.0067406	12.2	0.00646966	12.2	0.00961585	12.2	0.00241354	12.2	0.00767705
12.4	0.00807964	12.4	0.00287961	12.4	0.00702389	12.4	0.00799925	12.4	0.01002276	12.4	0.00505235	12.4	0.00990328	12.4	0.00883957	12.4	0.00983921	12.4	0.00290188	12.4	0.01073508	12.4	0.00400799	12.4	0.00922391	12.4	0.0070124	12.4	0.00218494	12.4	0.00875433
12.6	0.00973434	12.6	0.00815071	12.6	0.0069587	12.6	0.01238698	12.6	0.0068354	12.6	0.00391705	12.6	0.00958314	12.6	0.00713809	12.6	0.01095882	12.6	0.00334845	12.6	0.00700091	12.6	0.00572913	12.6	0.00658386	12.6	0.00791701	12.6	0.00554654	12.6	0.01036673
12.8	0.00991595	12.8	0.00756573	12.8	0.00830551	12.8	0.00590965	12.8	0.00760119	12.8	0.00659884	12.8	0.0121902	12.8	0.01024407	12.8	0.01445452	12.8	0.00235325	12.8	0.01471979	12.8	0.006718	12.8	0.00843318	12.8	0.00710383	12.8	0.00472007	12.8	0.00732425
13	0.00843935	13	0.00707693	13	0.00918756	13	0.01271718	13	0.00427997	13	0.00735083	13	0.00665167	13	0.00793678	13	0.00867408	13	0.00108898	13	0.01635029	13	0.00644404	13	0.00925203	13	0.00833622	13	0.00516264	13	0.00955934
13.2	0.01342792	13.2	0.00761048	13.2	0.00728217	13.2	0.0126037	13.2	0.00557709	13.2	0.00473352	13.2	0.00782957	13.2	0.0106828	13.2	0.00944793	13.2	0.00172307	13.2	0.012482	13.2	0.00866869	13.2	0.00737174	13.2	0.00681173	13.2	0.00551053	13.2	0.00983091
13.4	0.00884614	13.4	0.00263612	13.4	0.00657407	13.4	0.01108362	13.4	0.0046656	13.4	0.00780352	13.4	0.01194287	13.4	0.00933587	13.4	0.01006922	13.4	-0.000166	13.4	0.0121133	13.4	0.0053289	13.4	0.00304981	13.4	0.01408774	13.4	0.00842032	13.4	0.01106052
13.6	0.00789268	13.6	0.00628968	13.6	0.00857026	13.6	0.01252099	13.6	0.00853105	13.6	0.00749674	13.6	0.01124696	13.6	0.00547969	13.6	0.007483	13.6	0.00565282	13.6	0.00781874	13.6	0.00885655	13.6	0.00960152	13.6	0.00501906	13.6	0.00924407	13.6	0.01124933
13.8	0.00736005	13.8	0.00658801	13.8	0.00775167	13.8	0.00863722	13.8	0.00869377	13.8	0.00169844	13.8	0.00619923	13.8	0.01149762	13.8	0.0127179	13.8	0.00549378	13.8	0.01260945	13.8	0.00685853	13.8	0.00820236	13.8	0.00425599	13.8	0.00423594	13.8	0.01238744
14	0.01350117	14	0.00712018	14	0.00876758	14	0.00838591	14	0.00357713	14	0.00346915	14	0.00894131	14	0.00574498	14	0.00734768	14	0.00693906	14	0.00760066	14	0.00623029	14	0.00901077	14	0.01014904	14	0.00430455	14	0.0090835
14.2	0.01090809	14.2	0.00513304	14.2	0.00725241	14.2	0.00762366	14.2	0.00274074	14.2	0.00651594	14.2	0.00905076	14.2	0.00951731	14.2	0.00992921	14.2	0.00582098	14.2	0.01197467	14.2	0.0084188	14.2	0.0055175	14.2	0.00669754	14.2	0.01067862	14.2	0.01262936
14.4	0.01263129	14.4	0.0065816	14.4	0.01138327	14.4	0.00907154	14.4	0.00470641	14.4	-0.00220614	14.4	0.00911621	14.4	0.00728305	14.4	0.00995595	14.4	0.00206085	14.4	0.01436243	14.4	0.00618538	14.4	0.01077758	14.4	0.00811423	14.4	0.00743328	14.4	0.01102958
14.6	0.00700273	14.6	0.00155596	14.6	0.00727217	14.6	0.00719982	14.6	0.00495278	14.6	0.00382353	14.6	0.01114742	14.6	0.00866437	14.6	0.01043782	14.6	0.00560947	14.6	0.01375644	14.6	0.00594739	14.6	0.00995255	14.6	0.00889846	14.6	0.00512039	14.6	0.01095177
14.8	0.01102626	14.8	0.00354034	14.8	0.01018584	14.8	0.00723561	14.8	0.00766365	14.8	0.00472423	14.8	0.00747277	14.8	0.00987548	14.8	0.00907597	14.8	0.00002835	14.8	0.01248565	14.8	0.01027586	14.8	0.00788219	14.8	0.01216564	14.8	0.00567742	14.8	0.00796906
15	0.01547621	15	0.00333379	15	0.00883364	15	0.0076054	15	0.00766199	15	0.0064376	15	0.0039199	15	0.0064435	15	0.01358962	15	0.00218537	15	0.01142481	15	0.01078347	15	0.00691355	15	0.01146174	15	0.00731778	15	0.01137448
15.2	0.01044827	15.2	0.00200875	15.2	0.0116637	15.2	0.01136511	15.2	0.00626263	15.2	0.00462593	15.2	0.00788747	15.2	0.007624	15.2	0.01162339	15.2	0.00510629	15.2	0.01186712	15.2	0.00797926	15.2	0.00771126	15.2	0.00785115	15.2	0.00766788	15.2	0.00905068
15.4	0.00920469	15.4	0.00826818	15.4	0.0106755	15.4	0.01346198	15.4	0.00971439	15.4	0.00951397	15.4	0.00897735	15.4	0.00745711	15.4	0.01008564	15.4	0.00242336	15.4	0.00835761	15.4	0.0090406	15.4	0.00778846	15.4	0.01031339	15.4	0.00262401	15.4	0.00783101
15.6	0.01038324	15.6	0.00667626	15.6	0.00990846	15.6	0.01290155	15.6	0.00611784	15.6	0.00472183	15.6	0.00748285	15.6	0.01103577	15.6	0.00875928	15.6	0.00380406	15.6	0.01115839	15.6	0.00606729	15.6	0.01165494	15.6	0.01356473	15.6	0.00430891	15.6	0.0119369
15.8	0.01174346	15.8	0.00604277	15.8	0.01053866	15.8	0.01107809	15.8	0.00688988	15.8	0.00185214	15.8	0.00918381	15.8	0.00443119	15.8	0.01326799	15.8	0.00506208	15.8	0.01419535	15.8	0.00730849	15.8	0.01133766	15.8	0.010418	15.8	0.00627557	15.8	0.01558553
16	0.01170203	16	0.00800737	16	0.01341945	16	0.01355624	16	0.00558621	16	0.00355628	16	0.00657666	16	0.00882737	16	0.00841448	16	0.00181503	16	0.01270658	16	0.00904484	16	0.00952545	16	0.00845574	16	0.00245051	16	0.01057454
16.2	0.00986662	16.2	0.00531874	16.2	0.01117429	16.2	0.0118891	16.2	0.00451181	16.2	0.00347285	16.2	0.01234438	16.2	0.00568155	16.2	0.00969543	16.2	0.00870634	16.2	0.01049683	16.2	0.0148942	16.2	0.01007633	16.2	0.00906298	16.2	0.01110533	16.2	0.01223471
16.4	0.01234737	16.4	0.00424968	16.4	0.01160007	16.4	0.0089083	16.4	0.00856059	16.4	0.00736849	16.4	0.00769447	16.4	0.00451652	16.4	0.00485539	16.4	0.00431905	16.4	0.01417205	16.4	0.0079134	16.4	0.00986622	16.4	0.01073286	16.4	0.00801091	16.4	0.0123813
16.6	0.00846146	16.6	0.00787578	16.6	0.00806166	16.6	0.01133437	16.6	0.00540862	16.6	0.00650587	16.6	0.01453727	16.6	0.00570568	16.6	0.00773403	16.6	0.00587783	16.6	0.00919504	16.6	0.00919219	16.6	0.01074245	16.6	0.00992817	16.6	0.00612642	16.6	0.01138649
16.8	0.01319242	16.8	0.00660767	16.8	0.00980722	16.8	0.00810447	16.8	0.00598686	16.8	0.0031538	16.8	0.01082854	16.8	0.01057378	16.8	0.0092585	16.8	0.008029	16.8	0.01146273	16.8	0.00840113	16.8	0.00959835	16.8	0.00911292	16.8	0.01084226	16.8	0.01156921
17	0.00730983	17	0.00242666	17	0.00784477	17	0.0097169	17	0.00338335	17	0.0027333	17	0.00946853	17	0.00611382	17	0.01313168	17	0.00341471	17	0.00803136	17	0.00714428	17	0.01470609	17	0.0090051	17	0.00772712	17	0.00913952
17.2	0.00663769	17.2	0.00516118	17.2	0.00806045	17.2	0.01051989	17.2	0.0067927	17.2	0.00887662	17.2	0.00831169	17.2	0.01158843	17.2	0.00491829	17.2	0.00228982	17.2	0.01461577	17.2	0.00638775	17.2	0.00764745	17.2	0.00671526	17.2	0.00903576	17.2	0.00910161
17.4	0.01490082	17.4	0.00473941	17.4	0.0109732	17.4	0.01380643	17.4	0.00948189	17.4	0.00785147	17.4	0.01172189	17.4	0.00594886	17.4	0.00891038	17.4	0.00321924	17.4	0.01701172	17.4	0.01030658	17.4	0.01767877	17.4	0.00734777	17.4	0.00886114	17.4	0.00785522
17.6	0.01265842	17.6	0.00360752	17.6	0.00801066	17.6	0.01275913	17.6	0.00679088	17.6	0.00750456	17.6	0.00829419	17.6	0.01045876	17.6	0.00990482	17.6	0.00312327	17.6	0.01552679	17.6	0.01127012	17.6	0.01021037	17.6	0.00928145	17.6	0.01215936	17.6	0.00577325
17.8	0.01140528	17.8	0.00918526	17.8	0.01007981	17.8	0.0145447	17.8	0.00795927	17.8	0.00352279	17.8	0.00787566	17.8	0.00833384	17.8	0.00890442	17.8	0.00735848	17.8	0.01190573	17.8	0.00751131	17.8	0.00893384	17.8	0.012439	17.8	0.00270539	17.8	0.00825127
18	0.00667322	18	0.00754891	18	0.00786378	18	0.01136312	18	0.00671219	18	0.00637328	18	0.01185929	18	0.00680634	18	0.00574531	18	0.00498912	18	0.01410461	18	0.0058408	18	0.00833201	18	0.00921463	18	0.00509615	18	0.01002346
18.2	0.00884482	18.2	0.00433545	18.2	0.00679103	18.2	0.01311549	18.2	0.00148355	18.2	0.00757731	18.2	0.00599724	18.2	0.01072862	18.2	0.010742	18.2	0.00643422	18.2	0.0091582	18.2	0.00697247	18.2	0.00532032	18.2	0.01140836	18.2	0.00808454	18.2	0.01128845
18.4	0.01521919	18.4	0.00841265	18.4	0.01088917	18.4	0.01202674	18.4	0.00688045	18.4	0.01024661	18.4	0.01130285	18.4	0.01074908	18.4	0.00787616	18.4	0.00103001	18.4	0.01609746	18.4	0.00586442	18.4	0.00952884	18.4	0.01025803	18.4	0.00890889	18.4	0.0119794
18.6	0.01532245	18.6	0.00161384	18.6	0.01090768	18.6	0.00792367	18.6	0.00467545	18.6	0.00706441	18.6	0.0113663	18.6	0.01172792	18.6	0.01288037	18.6	0.00794319	18.6	0.01221018	18.6	0.01142606	18.6	0.00895531	18.6	0.00792403	18.6	0.01044596	18.6	0.009086
18.8	0.01151535	18.8	0.00758211	18.8	0.01088543	18.8	0.01096328	18.8	0.00705035	18.8	0.00296625	18.8	0.009552	18.8	0.00414534	18.8	0.01123611	18.8	0.00355051	18.8	0.01279307	18.8	0.00920835	18.8	0.01234677	18.8	0.0124497	18.8	0.00895375	18.8	0.01065161
19	0.00876462	19	0.00683633	19	0.00907557	19	0.01321914	19	0.00684461	19	0.005606	19	0.01003445	19	0.00745965	19	0.00666732	19	0.00653998	19	0.01409245	19	0.00890623	19	0.00905631	19	0.00810877	19	0.00812366	19	0.01389332
19.2	0.00977765	19.2	0.00788768	19.2	0.00668352	19.2	0.01472911	19.2	0.00598845	19.2	0.00626694	19.2	0.01119217	19.2	0.01012661	19.2	0.00885441	19.2	0.00615239	19.2	0.01326442	19.2	0.00618612	19.2	0.01021921	19.2	0.00869855	19.2	0.00696716	19.2	0.01441087
19.4	0.01264973	19.4	0.00308616	19.4	0.00843247	19.4	0.0101077	19.4	0.0036157	19.4	0.00673824	19.4	0.00817007	19.4	0.00721119	19.4	0.01453057	19.4	0.00657614	19.4	0.01106995	19.4	0.00839892	19.4	0.01116287	19.4	0.00877776	19.4	0.00258541	19.4	0.00937785
19.6	0.01267261	19.6	0.00638178	19.6	0.00808361	19.6	0.01400242	19.6	0.00592939	19.6	0.00121827	19.6	0.01105339	19.6	0.00642005	19.6	0.01116261	19.6	0.00546887	19.6	0.01141065	19.6	0.01175634	19.6	0.00854039	19.6	0.01153288	19.6	0.0142078	19.6	0.0112702
19.8	0.00825438	19.8	0.00398176	19.8	0.01392976	19.8	0.01473608	19.8	0.00831301	19.8	0.00553266	19.8	0.0095715	19.8	0.00908597	19.8	0.00913995	19.8	0.00736416	19.8	0.01292533	19.8	0.00716878	19.8	0.0095986	19.8	0.0108433	19.8	0.00952285	19.8	0.00868543
20	0.00875925	20	0.00589484	20	0.01137048	20	0.0097132	20	0.00632392	20	0.00395239	20	0.01193044	20	0.00723279	20	0.01138779	20	0.00689296	20	0.00926199	20	0.00812382	20	0.00992601	20	0.01263388	20	0.00821989	20	0.01144301
20.2	0.01517494	20.2	0.00924974	20.2	0.01059892	20.2	0.01242261	20.2	0.00823833	20.2	0.0033225	20.2	0.00551241	20.2	0.0111176	20.2	0.0132326	20.2	0.00535435	20.2	0.01428733	20.2	0.01097422	20.2	0.01089805	20.2	0.01388204	20.2	0.01018514	20.2	0.00654027
20.4	0.01047521	20.4	0.0077258	20.4	0.01022091	20.4	0.01233567	20.4	0.00283358	20.4	0.00780584	20.4	0.0067494	20.4	0.01121826	20.4	0.01493549	20.4	0.00281128	20.4	0.01239109	20.4	0.00733242	20.4	0.00931143	20.4	0.00638114	20.4	0.00224009	20.4	0.00738406
20.6	0.01253237	20.6	0.00543895	20.6	0.01058375	20.6	0.01126816	20.6	0.00386935	20.6	0.00550089	20.6	0.00493377	20.6	0.00554392	20.6	0.01418277	20.6	0.00371513	20.6	0.01447023	20.6	0.01112341	20.6	0.00807094	20.6	0.00850219	20.6	0.01096425	20.6	0.01485243
20.8	0.01293483	20.8	0.0060982	20.8	0.01148904	20.8	0.01354343	20.8	0.00508132	20.8	0.00233273	20.8	0.01333888	20.8	0.01195771	20.8	0.0142861	20.8	0.00817634	20.8	0.0143396	20.8	0.00737103	20.8	0.00980572	20.8	0.01265027	20.8	0.00813327	20.8	0.01768279
21	0.01369598	21	0.00710084	21	0.01241703	21	0.01247161	21	0.0008556	21	0.0053305	21	0.00817992	21	0.0086326	21	0.01271107	21	0.005603	21	0.01126699	21	0.01126037	21	0.01001068	21	0.00886606	21	0.00932735	21	0.00987225
21.2	0.01303443	21.2	0.00555501	21.2	0.01253174	21.2	0.01639507	21.2	0.01037331	21.2	0.00369135	21.2	0.00786643	21.2	0.0128272	21.2	0.01183277	21.2	0.0067401	21.2	0.01949131	21.2	0.00909598	21.2	0.0130539	21.2	0.01115146	21.2	0.00948538	21.2	0.01046984
21.4	0.01509702	21.4	0.00708904	21.4	0.00797124	21.4	0.01004567	21.4	0.00529722	21.4	0.00535355	21.4	0.00634812	21.4	0.00915612	21.4	0.00887716	21.4	0.00467885	21.4	0.01778577	21.4	0.00572423	21.4	0.01053818	21.4	0.01283375	21.4	0.00837448	21.4	0.0132994
21.6	0.00996696	21.6	0.00633595	21.6	0.01375523	21.6	0.01539312	21.6	0.00221938	21.6	0.00493294	21.6	0.00792849	21.6	0.00756388	21.6	0.01015713	21.6	0.00641823	21.6	0.01232214	21.6	0.0068748	21.6	0.01014745	21.6	0.00809694	21.6	0.0045062	21.6	0.01369511
21.8	0.01154342	21.8	0.00914006	21.8	0.0102481	21.8	0.01232431	21.8	0.00271991	21.8	0.00526144	21.8	0.00644837	21.8	0.00857353	21.8	0.01080426	21.8	0.00401794	21.8	0.01236414	21.8	0.00721708	21.8	0.01170923	21.8	0.00973003	21.8	0.0106844	21.8	0.00836518
22	0.01320153	22	0.00846694	22	0.00600024	22	0.01720993	22	0.01028327	22	0.00338595	22	0.01334008	22	0.00574827	22	0.01306412	22	0.00456518	22	0.01387029	22	0.00884515	22	0.01065538	22	0.00920091	22	0.0079015	22	0.01277702
22.2	0.01287382	22.2	0.00797605	22.2	0.00981225	22.2	0.01354956	22.2	0.00449069	22.2	0.00200019	22.2	0.00759089	22.2	0.01073004	22.2	0.01538212	22.2	0.00473569	22.2	0.01334391	22.2	0.00686052	22.2	0.00802338	22.2	0.01058699	22.2	0.01310672	22.2	0.01316731
22.4	0.00923823	22.4	0.0038146	22.4	0.00493517	22.4	0.01269464	22.4	0.00470763	22.4	0.00706052	22.4	0.01165936	22.4	0.01032491	22.4	0.00999686	22.4	0.00597354	22.4	0.01169712	22.4	0.00753016	22.4	0.00850065	22.4	0.01358703	22.4	0.01362254	22.4	0.01075226
22.6	0.01215521	22.6	0.0091463	22.6	0.01121973	22.6	0.01540931	22.6	0.0083244	22.6	0.00428249	22.6	0.00774653	22.6	0.00953674	22.6	0.0143286	22.6	0.00693096	22.6	0.01259078	22.6	0.00922058	22.6	0.01248451	22.6	0.0110423	22.6	0.00721795	22.6	0.01177625
22.8	0.01323075	22.8	0.01045072	22.8	0.01011967	22.8	0.01221581	22.8	0.00567096	22.8	0.00734674	22.8	0.01567726	22.8	0.00552881	22.8	0.01025596	22.8	0.00611571	22.8	0.01791723	22.8	0.01052246	22.8	0.00867744	22.8	0.00639105	22.8	0.01289761	22.8	0.01602955
23	0.01766126	23	0.0052906	23	0.00790013	23	0.01178719	23	0.0060758	23	0.00378658	23	0.00993834	23	0.00921731	23	0.00641765	23	0.00649183	23	0.01261272	23	0.00830871	23	0.00859648	23	0.00771001	23	0.01282893	23	0.00943888
23.2	0.01042974	23.2	0.00625919	23.2	0.01269596	23.2	0.0108122	23.2	0.0083268	23.2	0.00661796	23.2	0.00553123	23.2	0.00951554	23.2	0.01386324	23.2	0.00241574	23.2	0.01717323	23.2	0.01265	23.2	0.0072616	23.2	0.0109932	23.2	0.00779347	23.2	0.01178435
23.4	0.01140941	23.4	0.00690287	23.4	0.01150191	23.4	0.01234361	23.4	0.00808654	23.4	0.00817992	23.4	0.00803641	23.4	0.01078536	23.4	0.01143125	23.4	0.00985362	23.4	0.01628867	23.4	0.00995016	23.4	0.01127363	23.4	0.00923105	23.4	0.01064354	23.4	0.00929612
23.6	0.00964324	23.6	0.00671066	23.6	0.01074555	23.6	0.01554782	23.6	0.00246157	23.6	0.00741115	23.6	0.0080733	23.6	0.00633657	23.6	0.01580954	23.6	0.01007335	23.6	0.01302715	23.6	0.00956301	23.6	0.00847612	23.6	0.0092205	23.6	0.00964405	23.6	0.01464351
23.8	0.01120429	23.8	0.0081673	23.8	0.00881756	23.8	0.01665954	23.8	0.00616539	23.8	0.00632468	23.8	0.01193522	23.8	0.00913532	23.8	0.01403662	23.8	0.00514499	23.8	0.01254186	23.8	0.00948364	23.8	0.01271126	23.8	0.01080926	23.8	0.00630913	23.8	0.01339649
24	0.01765234	24	0.00769943	24	0.0119917	24	0.01305634	24	0.00705856	24	0.0089345	24	0.01388793	24	0.00817904	24	0.01238376	24	0.00310765	24	0.01174879	24	0.00958724	24	0.008378	24	0.00912907	24	0.00934538	24	0.01474862
24.2	0.01106806	24.2	0.0038084	24.2	0.01165121	24.2	0.01097079	24.2	0.00406564	24.2	0.00579034	24.2	0.01183523	24.2	0.00679729	24.2	0.01129913	24.2	0.00846572	24.2	0.01512233	24.2	0.00961975	24.2	0.00939167	24.2	0.01450802	24.2	0.01056798	24.2	0.01224839
24.4	0.00946594	24.4	0.00846712	24.4	0.01024675	24.4	0.0116731	24.4	0.00960423	24.4	0.00699674	24.4	0.01057243	24.4	0.01316141	24.4	0.00935099	24.4	0.00546192	24.4	0.01721533	24.4	0.00772426	24.4	0.01018583	24.4	0.01055661	24.4	0.00604016	24.4	0.01074312
24.6	0.00841932	24.6	0.00614611	24.6	0.01062709	24.6	0.0166757	24.6	0.00492444	24.6	0.00656183	24.6	0.01144838	24.6	0.00481431	24.6	0.01574339	24.6	0.00302812	24.6	0.01887968	24.6	0.01170187	24.6	0.01047952	24.6	0.01091686	24.6	0.00299068	24.6	0.01274868
24.8	0.01010257	24.8	0.00566147	24.8	0.01124243	24.8	0.01014891	24.8	0.00512138	24.8	0.0060948	24.8	0.00999099	24.8	0.00858006	24.8	0.00753595	24.8	0.00604419	24.8	0.01667485	24.8	0.01040255	24.8	0.01292194	24.8	0.01376551	24.8	0.0097226	24.8	0.01040768
25	0.01022231	25	0.00715533	25	0.00919676	25	0.01246057	25	0.00295207	25	0.00610199	25	0.00771834	25	0.00616327	25	0.01333203	25	0.00545114	25	0.01402969	25	0.00756041	25	0.01291555	25	0.00885788	25	0.0112113	25	0.00684095
25.2	0.01351654	25.2	0.00054068	25.2	0.00504303	25.2	0.01468249	25.2	0.00886618	25.2	0.00935243	25.2	0.0065986	25.2	0.00632561	25.2	0.01272094	25.2	0.00654874	25.2	0.01184191	25.2	0.00943194	25.2	0.01405013	25.2	0.00952633	25.2	0.00978228	25.2	0.01446401
25.4	0.01395748	25.4	0.00812508	25.4	0.01192749	25.4	0.0164898	25.4	0.01235754	25.4	0.00738615	25.4	0.01010007	25.4	0.00593472	25.4	0.01082841	25.4	0.00468058	25.4	0.01132454	25.4	0.01063534	25.4	0.00877579	25.4	0.01310412	25.4	0.0097342	25.4	0.00842226
25.6	0.01478772	25.6	0.00558355	25.6	0.01248699	25.6	0.01062686	25.6	0.00565013	25.6	0.00691097	25.6	0.00837357	25.6	0.00787508	25.6	0.01472267	25.6	0.00825465	25.6	0.0146243	25.6	0.00700897	25.6	0.01112657	25.6	0.01149666	25.6	0.01166557	25.6	0.0126018
25.8	0.01412978	25.8	0.00381249	25.8	0.00747792	25.8	0.01323937	25.8	0.00778626	25.8	0.00772027	25.8	0.01017999	25.8	0.00849772	25.8	0.01624212	25.8	0.00783309	25.8	0.01076474	25.8	0.00934193	25.8	0.0137257	25.8	0.01113562	25.8	0.00434878	25.8	0.0117348
26	0.01457023	26	0.01219597	26	0.00900539	26	0.01365478	26	0.00936288	26	0.00764474	26	0.00638365	26	0.01337586	26	0.01510179	26	0.00966307	26	0.01493761	26	0.00985576	26	0.01180024	26	0.01004521	26	0.00453752	26	0.01497616
26.2	0.0126769	26.2	0.00891154	26.2	0.00498565	26.2	0.0123762	26.2	0.00529143	26.2	0.00580239	26.2	0.01097391	26.2	0.01221052	26.2	0.01366782	26.2	0.006296	26.2	0.01702815	26.2	0.01042555	26.2	0.00982882	26.2	0.01551918	26.2	0.01083926	26.2	0.01493246
26.4	0.01494514	26.4	0.00773657	26.4	0.01180318	26.4	0.01280697	26.4	0.00790455	26.4	0.00617056	26.4	0.01053911	26.4	0.01013665	26.4	0.01472741	26.4	0.00514555	26.4	0.01684129	26.4	0.01128429	26.4	0.00958088	26.4	0.00917555	26.4	0.00815012	26.4	0.01268971
26.6	0.01515364	26.6	0.00951571	26.6	0.00845615	26.6	0.01449911	26.6	0.00966016	26.6	0.0100948	26.6	0.00897834	26.6	0.00967025	26.6	0.01465654	26.6	0.00540347	26.6	0.01550638	26.6	0.0141284	26.6	0.01007862	26.6	0.01403829	26.6	0.0076715	26.6	0.01089696
26.8	0.00864056	26.8	0.00592421	26.8	0.01035235	26.8	0.01980285	26.8	0.00870711	26.8	0.01231342	26.8	0.00547199	26.8	0.00854552	26.8	0.01520887	26.8	0.01077686	26.8	0.01021003	26.8	0.00859668	26.8	0.00883294	26.8	0.00980079	26.8	0.00514678	26.8	0.01472489
27	0.01485535	27	0.00683419	27	0.00849953	27	0.01363689	27	0.00856488	27	0.00695231	27	0.01160346	27	0.01414094	27	0.01405647	27	0.00681318	27	0.0135868	27	0.00984079	27	0.01172343	27	0.01254531	27	0.00792231	27	0.01199104
27.2	0.0130477	27.2	0.00717177	27.2	0.00931509	27.2	0.0160227	27.2	0.00896364	27.2	0.00296505	27.2	0.00588693	27.2	0.01236303	27.2	0.01455886	27.2	0.00401597	27.2	0.01159323	27.2	0.00890262	27.2	0.01368401	27.2	0.01375257	27.2	0.01046938	27.2	0.01243737
27.4	0.01286383	27.4	0.01200238	27.4	0.0101672	27.4	0.01437291	27.4	0.00447706	27.4	0.00731918	27.4	0.00978264	27.4	0.00789888	27.4	0.01592366	27.4	0.00724009	27.4	0.01105572	27.4	0.00898086	27.4	0.00929836	27.4	0.01293406	27.4	0.01052793	27.4	0.01002655
27.6	0.01247427	27.6	0.00857549	27.6	0.01108727	27.6	0.01790067	27.6	0.00278356	27.6	0.00726673	27.6	0.00823508	27.6	0.0065799	27.6	0.01300053	27.6	0.00901272	27.6	0.0108507	27.6	0.01246215	27.6	0.01030048	27.6	0.01466895	27.6	0.01097021	27.6	0.01475441
27.8	0.01034717	27.8	0.00733456	27.8	0.00910102	27.8	0.01375777	27.8	0.01060689	27.8	0.00519237	27.8	0.00794171	27.8	0.00774004	27.8	0.01227672	27.8	0.00606716	27.8	0.01317323	27.8	0.00711529	27.8	0.00997605	27.8	0.01201406	27.8	0.00785174	27.8	0.01775918
28	0.01767927	28	0.00648314	28	0.00792116	28	0.01548412	28	0.00058024	28	0.00728216	28	0.0127315	28	0.00950517	28	0.01414611	28	0.00815591	28	0.0150472	28	0.01043511	28	0.00864761	28	0.01142038	28	0.0118624	28	0.01087472
28.2	0.01436756	28.2	0.00649937	28.2	0.00835458	28.2	0.0216121	28.2	0.00416829	28.2	0.00710462	28.2	0.01123953	28.2	0.00782399	28.2	0.01434583	28.2	0.00968645	28.2	0.01443299	28.2	0.01100796	28.2	0.00823131	28.2	0.01497579	28.2	0.00544794	28.2	0.0141851
28.4	0.01774801	28.4	0.00859967	28.4	0.00461322	28.4	0.01500875	28.4	0.00386561	28.4	0.0070897	28.4	0.00726192	28.4	0.01149841	28.4	0.01218893	28.4	0.00817544	28.4	0.01775447	28.4	0.01463459	28.4	0.00698855	28.4	0.01371715	28.4	0.01062834	28.4	0.01278808
28.6	0.01144953	28.6	0.00779706	28.6	0.0068647	28.6	0.01410115	28.6	0.00736763	28.6	0.00134085	28.6	0.00621165	28.6	0.00791265	28.6	0.01392759	28.6	0.0112751	28.6	0.01300261	28.6	0.01092616	28.6	0.00834413	28.6	0.01127327	28.6	0.00965229	28.6	0.01358721
28.8	0.01451133	28.8	0.00911872	28.8	0.00706889	28.8	0.01308552	28.8	0.00746627	28.8	0.00455575	28.8	0.0060521	28.8	0.00852129	28.8	0.01295526	28.8	0.00754272	28.8	0.01611069	28.8	0.00948202	28.8	0.01192732	28.8	0.0122013	28.8	0.01451856	28.8	0.01164325
29	0.01487716	29	0.01039962	29	0.01192531	29	0.01391598	29	0.0041424	29	0.00482391	29	0.01448459	29	0.00962057	29	0.00802042	29	0.00707578	29	0.01599311	29	0.00916852	29	0.00758734	29	0.00860158	29	0.01246974	29	0.01282033
29.2	0.01803994	29.2	0.00627075	29.2	0.00871945	29.2	0.01230104	29.2	0.00679352	29.2	0.00922412	29.2	0.00706288	29.2	0.01135791	29.2	0.01953679	29.2	0.00369388	29.2	0.01036397	29.2	0.00750881	29.2	0.00916835	29.2	0.01780854	29.2	0.01045887	29.2	0.00930469
29.4	0.01638714	29.4	0.00089023	29.4	0.01072128	29.4	0.01509831	29.4	0.00473432	29.4	0.00970193	29.4	0.00415027	29.4	0.01002876	29.4	0.01293498	29.4	0.00959086	29.4	0.01567611	29.4	0.01005151	29.4	0.01083823	29.4	0.01187954	29.4	0.00620275	29.4	0.01283249
29.6	0.01482758	29.6	0.00938105	29.6	0.00730185	29.6	0.0114186	29.6	0.00383126	29.6	0.0065992	29.6	0.00988152	29.6	0.00666303	29.6	0.01957934	29.6	0.0043424	29.6	0.01699203	29.6	0.00963015	29.6	0.01246126	29.6	0.0137709	29.6	0.00866493	29.6	0.01140158
29.8	0.01511501	29.8	0.00436933	29.8	0.00810394	29.8	0.01895004	29.8	0.0014832	29.8	0.00630464	29.8	0.0066966	29.8	0.01619417	29.8	0.01420935	29.8	0.00768875	29.8	0.02155028	29.8	0.00482475	29.8	0.01014918	29.8	0.01192808	29.8	0.01165885	29.8	0.01500126
30	0.01537963	30	0.0102085	30	0.00959355	30	0.01450381	30	0.00694294	30	0.00932977	30	0.01310787	30	0.01110175	30	0.012076	30	0.00757318	30	0.01334473	30	0.00998628	30	0.01051673	30	0.00984813	30	0.00501462	30	0.01339965
30.2	0.01576456	30.2	0.00818893	30.2	0.01046687	30.2	0.01596634	30.2	0.00550186	30.2	0.00282237	30.2	0.00942961	30.2	0.00915105	30.2	0.01441079	30.2	0.00885909	30.2	0.01889466	30.2	0.00824915	30.2	0.01192756	30.2	0.01383049	30.2	0.01065578	30.2	0.01659498
30.4	0.01029191	30.4	0.0066967	30.4	0.00783143	30.4	0.01849182	30.4	0.00814295	30.4	0.01111986	30.4	0.01085871	30.4	0.00560174	30.4	0.01342887	30.4	0.01027607	30.4	0.00689281	30.4	0.00637007	30.4	0.00969758	30.4	0.01518259	30.4	0.00929009	30.4	0.01241715
30.6	0.01236183	30.6	0.01057985	30.6	0.00972451	30.6	0.01540851	30.6	0.00294224	30.6	0.00324556	30.6	0.00685361	30.6	0.00847406	30.6	0.01390157	30.6	0.00526451	30.6	0.01705392	30.6	0.00915531	30.6	0.01085393	30.6	0.01108	30.6	0.00770959	30.6	0.01694184
30.8	0.01412191	30.8	0.00863645	30.8	0.00871444	30.8	0.01653878	30.8	0.00810731	30.8	0.00708508	30.8	0.01066918	30.8	0.00921527	30.8	0.00925627	30.8	0.00694102	30.8	0.01351074	30.8	0.01070549	30.8	0.00831246	30.8	0.01251452	30.8	0.01453289	30.8	0.01862416
31	0.01439433	31	0.00952985	31	0.01098149	31	0.01593955	31	0.00400242	31	0.00877699	31	0.00624596	31	0.01108131	31	0.01685174	31	0.00545756	31	0.01365601	31	0.01020321	31	0.01498802	31	0.01281868	31	0.0067018	31	0.01579824
31.2	0.0143057	31.2	0.00526736	31.2	0.00995893	31.2	0.01669445	31.2	0.00638936	31.2	0.01046267	31.2	0.00648167	31.2	0.00796783	31.2	0.01475383	31.2	0.00827875	31.2	0.01479547	31.2	0.01181844	31.2	0.0076373	31.2	0.01169523	31.2	0.01224651	31.2	0.01588982
31.4	0.01039249	31.4	0.00900231	31.4	0.01343664	31.4	0.01716788	31.4	0.0066008	31.4	0.01094593	31.4	0.00585269	31.4	0.0099272	31.4	0.01242344	31.4	0.01056395	31.4	0.01846106	31.4	0.0108746	31.4	0.01237043	31.4	0.01028507	31.4	0.01311472	31.4	0.0138916
31.6	0.01231917	31.6	0.0049269	31.6	0.01108673	31.6	0.01892766	31.6	0.00871937	31.6	0.00398649	31.6	0.01084579	31.6	0.01315244	31.6	0.01983635	31.6	0.00874789	31.6	0.01382724	31.6	0.00926612	31.6	0.0110654	31.6	0.01182085	31.6	0.01047108	31.6	0.01105571
31.8	0.00945668	31.8	0.0042734	31.8	0.01179449	31.8	0.01893648	31.8	0.00427014	31.8	0.00361546	31.8	0.00398254	31.8	0.01228611	31.8	0.01541425	31.8	0.01069721	31.8	0.01121801	31.8	0.01120095	31.8	0.01351264	31.8	0.0153682	31.8	0.01382404	31.8	0.0138583
32	0.01546844	32	0.00976282	32	0.00930101	32	0.0180987	32	0.00781701	32	0.00810138	32	0.01046141	32	0.00463731	32	0.01940026	32	0.0051181	32	0.01749808	32	0.00914404	32	0.01007668	32	0.01356896	32	0.00979888	32	0.01478583
32.2	0.01767263	32.2	0.00797478	32.2	0.00834639	32.2	0.01533572	32.2	0.00583856	32.2	0.0067464	32.2	0.01265885	32.2	0.00748437	32.2	0.01501441	32.2	0.00562616	32.2	0.0161269	32.2	0.01364694	32.2	0.01282815	32.2	0.01435788	32.2	0.00900693	32.2	0.01364012
32.4	0.01454675	32.4	0.01091603	32.4	0.01001926	32.4	0.01776385	32.4	0.00905143	32.4	0.01181668	32.4	0.01280179	32.4	0.01385902	32.4	0.01473928	32.4	0.00846323	32.4	0.01866769	32.4	0.0132697	32.4	0.01010377	32.4	0.01257058	32.4	0.01251326	32.4	0.01449208
32.6	0.01287911	32.6	0.01106551	32.6	0.00508995	32.6	0.01477222	32.6	0.00754203	32.6	0.00277541	32.6	0.00845623	32.6	0.007568	32.6	0.01266317	32.6	0.00659754	32.6	0.01703596	32.6	0.01139255	32.6	0.01258813	32.6	0.0050684	32.6	0.01199652	32.6	0.01197765
32.8	0.0137807	32.8	0.01084643	32.8	0.00774782	32.8	0.01825817	32.8	0.00703589	32.8	0.00861751	32.8	0.01353493	32.8	0.00793474	32.8	0.0122628	32.8	0.01142935	32.8	0.01097901	32.8	0.00988856	32.8	0.01415947	32.8	0.01434682	32.8	0.00869817	32.8	0.01741049
33	0.01308599	33	0.00483689	33	0.00792827	33	0.01689464	33	0.00544851	33	0.00734607	33	0.0089091	33	0.01092485	33	0.01498258	33	0.00606575	33	0.0145373	33	0.00974684	33	0.01131697	33	0.01409451	33	0.01342171	33	0.01313199
33.2	0.01440593	33.2	0.00878429	33.2	0.01268267	33.2	0.01649871	33.2	0.00639385	33.2	0.00286497	33.2	0.00639969	33.2	0.00883497	33.2	0.01312252	33.2	0.00650877	33.2	0.01602128	33.2	0.01222907	33.2	0.0118178	33.2	0.01278028	33.2	0.00609076	33.2	0.01205795
33.4	0.01824866	33.4	0.00732685	33.4	0.012982	33.4	0.01759784	33.4	0.00815745	33.4	0.00578541	33.4	0.00834042	33.4	0.00718731	33.4	0.01102295	33.4	0.00940687	33.4	0.01621355	33.4	0.00817676	33.4	0.01417484	33.4	0.01262458	33.4	0.01238577	33.4	0.01499676
33.6	0.0142299	33.6	0.00845399	33.6	0.01027089	33.6	0.02037738	33.6	0.00856412	33.6	0.00998603	33.6	0.00345485	33.6	0.00967075	33.6	0.0112675	33.6	0.01125103	33.6	0.01274446	33.6	0.0084327	33.6	0.00789976	33.6	0.01047552	33.6	0.01072935	33.6	0.01510307
33.8	0.01295521	33.8	0.01139752	33.8	0.01221102	33.8	0.02011546	33.8	0.002803	33.8	0.0055926	33.8	0.00773917	33.8	0.01303395	33.8	0.01430445	33.8	0.01007493	33.8	0.01717266	33.8	0.01512197	33.8	0.00746176	33.8	0.01687142	33.8	0.01084852	33.8	0.00867625
34	0.01639526	34	0.00970264	34	0.00935045	34	0.01899488	34	0.00122206	34	0.00826534	34	0.01082249	34	0.01050172	34	0.01561333	34	0.01035218	34	0.01365087	34	0.00967397	34	0.00918133	34	0.01748622	34	0.01585178	34	0.01097183
34.2	0.01331679	34.2	0.01309883	34.2	0.01204824	34.2	0.01741354	34.2	0.00775272	34.2	0.01087848	34.2	0.00943376	34.2	0.00871176	34.2	0.01476111	34.2	0.00607141	34.2	0.01995558	34.2	0.01198231	34.2	0.01460903	34.2	0.01074526	34.2	0.00686571	34.2	0.01475221
34.4	0.01408217	34.4	0.00736495	34.4	0.00813552	34.4	0.01649063	34.4	0.00958285	34.4	0.00938736	34.4	0.01098082	34.4	0.01086036	34.4	0.01570143	34.4	0.00633221	34.4	0.01854362	34.4	0.0037478	34.4	0.01332591	34.4	0.01455925	34.4	0.01284421	34.4	0.00784587
34.6	0.01669016	34.6	0.00549841	34.6	0.00815873	34.6	0.01673552	34.6	0.00399313	34.6	0.01197265	34.6	0.00970694	34.6	0.01291135	34.6	0.01356039	34.6	0.00580512	34.6	0.01549851	34.6	0.01105339	34.6	0.00694379	34.6	0.01200944	34.6	0.0132791	34.6	0.01244302
34.8	0.01648092	34.8	0.01042798	34.8	0.01054364	34.8	0.01991423	34.8	0.00346922	34.8	0.00591915	34.8	0.00882752	34.8	0.01115706	34.8	0.01646259	34.8	0.00776331	34.8	0.01984493	34.8	0.01004362	34.8	0.0094262	34.8	0.01660671	34.8	0.00841158	34.8	0.00768535
35	0.0195896	35	0.01063203	35	0.00979905	35	0.02024619	35	0.00159639	35	0.00333569	35	0.00798058	35	0.00904975	35	0.01610693	35	0.00557529	35	0.01244533	35	0.01259778	35	0.01115253	35	0.0170402	35	0.01108818	35	0.01459625
35.2	0.01974579	35.2	0.01030773	35.2	0.01236511	35.2	0.02017757	35.2	0.00807614	35.2	0.00448705	35.2	0.00678774	35.2	0.01049373	35.2	0.01136575	35.2	0.00929483	35.2	0.01515037	35.2	0.00985097	35.2	0.01000891	35.2	0.01534837	35.2	0.01246705	35.2	0.01596829
35.4	0.01390556	35.4	0.00756728	35.4	0.01417243	35.4	0.01547167	35.4	0.00297716	35.4	0.00910144	35.4	0.00549239	35.4	0.00476434	35.4	0.01493842	35.4	0.01549726	35.4	0.01908612	35.4	0.01614287	35.4	0.00689572	35.4	0.01788959	35.4	0.00886799	35.4	0.01404134
35.6	0.01547397	35.6	0.00909726	35.6	0.00676086	35.6	0.01845421	35.6	0.00825395	35.6	0.00881461	35.6	0.00793869	35.6	0.00745964	35.6	0.01802084	35.6	0.01213981	35.6	0.01611448	35.6	0.01097276	35.6	0.01309948	35.6	0.01315829	35.6	0.00941538	35.6	0.01442148
35.8	0.01569088	35.8	0.00749151	35.8	0.01204024	35.8	0.01488013	35.8	0.00825572	35.8	0.0135098	35.8	0.00867659	35.8	0.00919268	35.8	0.02005712	35.8	0.00721674	35.8	0.01239474	35.8	0.01157619	35.8	0.01103442	35.8	0.01057915	35.8	0.01031639	35.8	0.01135733
36	0.01052742	36	0.00995296	36	0.01413199	36	0.01865633	36	0.00207985	36	0.00643878	36	0.00616762	36	0.01052062	36	0.01655004	36	0.007787	36	0.01336654	36	0.00934999	36	0.01275669	36	0.01494279	36	0.01181839	36	0.01118527
36.2	0.01709514	36.2	0.00454225	36.2	0.0091787	36.2	0.01890765	36.2	0.0000612	36.2	0.00793152	36.2	0.00575165	36.2	0.01082376	36.2	0.01678905	36.2	0.0107452	36.2	0.01668315	36.2	0.0097291	36.2	0.01301941	36.2	0.01707354	36.2	0.01517398	36.2	0.01625356
36.4	0.01603199	36.4	0.00854559	36.4	0.01123461	36.4	0.01470071	36.4	0.00236337	36.4	0.00948175	36.4	0.00948858	36.4	0.01219511	36.4	0.01840035	36.4	0.00625519	36.4	0.01905121	36.4	0.00942207	36.4	0.01077872	36.4	0.0118931	36.4	0.01207948	36.4	0.01446188
36.6	0.01070367	36.6	0.00864711	36.6	0.01082689	36.6	0.01599975	36.6	0.00846406	36.6	0.00920771	36.6	0.00836072	36.6	0.00692174	36.6	0.01638099	36.6	0.00929404	36.6	0.01613067	36.6	0.01450328	36.6	0.01038628	36.6	0.01374325	36.6	0.00970819	36.6	0.00894024
36.8	0.0113634	36.8	0.01365716	36.8	0.00652725	36.8	0.01835751	36.8	0.00519632	36.8	0.00755129	36.8	0.00715285	36.8	0.01196757	36.8	0.01669082	36.8	0.01226724	36.8	0.0164633	36.8	0.01368939	36.8	0.01376057	36.8	0.01350734	36.8	0.01102069	36.8	0.0175886
37	0.01321346	37	0.00642919	37	0.00589587	37	0.01602364	37	0.00820271	37	0.00500677	37	0.00713552	37	0.01567729	37	0.01615143	37	0.0037574	37	0.01843	37	0.0094344	37	0.01528426	37	0.01449585	37	0.01222378	37	0.010045
37.2	0.01608969	37.2	0.00827251	37.2	0.008632	37.2	0.02205614	37.2	0.00740934	37.2	0.01138638	37.2	0.00860557	37.2	0.00957781	37.2	0.01370246	37.2	0.00805421	37.2	0.02005905	37.2	0.01294081	37.2	0.01241747	37.2	0.01250469	37.2	0.01254866	37.2	0.01452179
37.4	0.0148937	37.4	0.00698399	37.4	0.00860547	37.4	0.01732732	37.4	0.00201644	37.4	0.01069586	37.4	0.00555954	37.4	0.00862738	37.4	0.01304929	37.4	0.0090824	37.4	0.01700095	37.4	0.00691346	37.4	0.01169185	37.4	0.01355696	37.4	0.0152107	37.4	0.01441676
37.6	0.01405098	37.6	0.00914164	37.6	0.00911836	37.6	0.02017142	37.6	0.00352672	37.6	0.0113407	37.6	0.01006653	37.6	0.01018619	37.6	0.01946209	37.6	0.0091648	37.6	0.01700012	37.6	0.01201642	37.6	0.00916215	37.6	0.013354	37.6	0.00958794	37.6	0.01710677
37.8	0.0147707	37.8	0.00927136	37.8	0.01389152	37.8	0.01528111	37.8	0.00431239	37.8	0.01002216	37.8	0.01110822	37.8	0.00511667	37.8	0.01252199	37.8	0.00857152	37.8	0.02079708	37.8	0.01207028	37.8	0.00981025	37.8	0.01379434	37.8	0.01135983	37.8	0.01454183
38	0.01240163	38	0.00679812	38	0.0090286	38	0.01779973	38	0.0045946	38	0.00617373	38	0.00929905	38	0.00792479	38	0.02043907	38	0.00811302	38	0.01784099	38	0.00836607	38	0.01291892	38	0.01609661	38	0.00735687	38	0.01049089
38.2	0.01724912	38.2	0.00909495	38.2	0.01186567	38.2	0.01691638	38.2	0.00699904	38.2	0.00511124	38.2	0.00593176	38.2	0.00649386	38.2	0.01602166	38.2	0.00763783	38.2	0.01269044	38.2	0.00474661	38.2	0.01259715	38.2	0.01387744	38.2	0.01266409	38.2	0.00965037
38.4	0.01810877	38.4	0.01011406	38.4	0.01407535	38.4	0.01884362	38.4	0.00227955	38.4	0.0105489	38.4	0.00564029	38.4	0.01350956	38.4	0.01425993	38.4	0.01176352	38.4	0.01175714	38.4	0.00772575	38.4	0.01404154	38.4	0.01595367	38.4	0.00600255	38.4	0.0131197
38.6	0.01287385	38.6	0.01453885	38.6	0.00933116	38.6	0.0166882	38.6	0.00273775	38.6	0.00839168	38.6	0.00518294	38.6	0.0087697	38.6	0.01965407	38.6	0.01191127	38.6	0.01783599	38.6	0.00825557	38.6	0.01020384	38.6	0.01299797	38.6	0.01077444	38.6	0.01649277
38.8	0.0197955	38.8	0.00969878	38.8	0.00918756	38.8	0.01541748	38.8	0.00362966	38.8	0.01218005	38.8	0.01187131	38.8	0.00744559	38.8	0.01748412	38.8	0.00764876	38.8	0.01684313	38.8	0.01457531	38.8	0.0163052	38.8	0.01275919	38.8	0.01005543	38.8	0.01524174
39	0.01338004	39	0.01109694	39	0.0061061	39	0.01870516	39	0.00742964	39	0.00871477	39	0.00840815	39	0.01059988	39	0.01838242	39	0.00672437	39	0.01439163	39	0.01070215	39	0.01276369	39	0.01330916	39	0.01106493	39	0.01329484
39.2	0.02027846	39.2	0.01001322	39.2	0.01397592	39.2	0.01668456	39.2	0.00551928	39.2	0.00888149	39.2	0.00725689	39.2	0.00726742	39.2	0.0186621	39.2	0.01064084	39.2	0.01506039	39.2	0.01364118	39.2	0.01478287	39.2	0.01437761	39.2	0.01202361	39.2	0.01392678
39.4	0.01247776	39.4	0.00905609	39.4	0.01177774	39.4	0.01674284	39.4	0.00579002	39.4	0.00850619	39.4	0.00695862	39.4	0.0062693	39.4	0.01630729	39.4	0.00808772	39.4	0.016157	39.4	0.00918068	39.4	0.01327235	39.4	0.0173191	39.4	0.01236736	39.4	0.01722757
39.6	0.01504784	39.6	0.00347144	39.6	0.01120268	39.6	0.01746037	39.6	0.00543679	39.6	0.01239284	39.6	0.00518948	39.6	0.00880862	39.6	0.01480013	39.6	0.01114149	39.6	0.022233	39.6	0.00677405	39.6	0.010974	39.6	0.01238818	39.6	0.00915535	39.6	0.01316636
39.8	0.01601291	39.8	0.0067862	39.8	0.01109202	39.8	0.02141765	39.8	0.00559805	39.8	0.01429533	39.8	0.01415638	39.8	0.00620473	39.8	0.01606314	39.8	0.0132245	39.8	0.01359831	39.8	0.00890921	39.8	0.01341319	39.8	0.01380767	39.8	0.01299602	39.8	0.01531915
40	0.01217387	40	0.00905067	40	0.01200275	40	0.0186772	40	0.00196181	40	0.01053281	40	0.00625099	40	0.00857731	40	0.01806839	40	0.01355845	40	0.02107861	40	0.01355716	40	0.01507265	40	0.01660316	40	0.00890803	40	0.01011504
40.2	0.01429974	40.2	0.01192605	40.2	0.00993796	40.2	0.01396993	40.2	0.00618297	40.2	0.00526185	40.2	0.01364748	40.2	0.01182064	40.2	0.01562997	40.2	0.00868435	40.2	0.0179936	40.2	0.01010413	40.2	0.01335043	40.2	0.01422032	40.2	0.012553	40.2	0.01502793
40.4	0.01673774	40.4	0.01153387	40.4	0.01141857	40.4	0.01536199	40.4	0.00578854	40.4	0.00788427	40.4	0.00963771	40.4	0.01386261	40.4	0.01343459	40.4	0.01157128	40.4	0.01837234	40.4	0.00872388	40.4	0.0150315	40.4	0.0111174	40.4	0.01522816	40.4	0.01425814
40.6	0.01583291	40.6	0.01146353	40.6	0.01091423	40.6	0.01617542	40.6	0.00696223	40.6	0.0052639	40.6	0.00745691	40.6	0.00822786	40.6	0.01697906	40.6	0.01400211	40.6	0.01533143	40.6	0.00890495	40.6	0.01090907	40.6	0.01426038	40.6	0.01178992	40.6	0.01536065
40.8	0.01683896	40.8	0.01147833	40.8	0.00959521	40.8	0.01812279	40.8	0.00412524	40.8	0.00390362	40.8	0.00477887	40.8	0.00963224	40.8	0.01842388	40.8	0.01170672	40.8	0.01910954	40.8	0.01215411	40.8	0.01550916	40.8	0.01483778	40.8	0.0156919	40.8	0.01765423
41	0.01647104	41	0.01200502	41	0.0113446	41	0.01829365	41	0.00829134	41	0.0079441	41	0.00960009	41	0.01097059	41	0.0166247	41	0.01318197	41	0.01739361	41	0.01797242	41	0.01025427	41	0.01855871	41	0.01356818	41	0.01422795
41.2	0.01638298	41.2	0.0094862	41.2	0.01055137	41.2	0.0195266	41.2	0.00557013	41.2	0.0088395	41.2	0.00875982	41.2	0.01180152	41.2	0.01636884	41.2	0.01116658	41.2	0.01698017	41.2	0.01142276	41.2	0.01101287	41.2	0.01597111	41.2	0.00931299	41.2	0.01820075
41.4	0.02021913	41.4	0.01230855	41.4	0.00780923	41.4	0.01759149	41.4	0.00817185	41.4	0.00660321	41.4	0.0087848	41.4	0.00994	41.4	0.01601784	41.4	0.01053522	41.4	0.01943923	41.4	0.01253593	41.4	0.01305129	41.4	0.0185908	41.4	0.0109695	41.4	0.01300588
41.6	0.01535097	41.6	0.00838893	41.6	0.01156623	41.6	0.02261585	41.6	-0.00191197	41.6	0.00749059	41.6	0.00719406	41.6	0.00910547	41.6	0.02049511	41.6	0.00806925	41.6	0.01725668	41.6	0.01583568	41.6	0.01333551	41.6	0.01439888	41.6	0.0145281	41.6	0.013434
41.8	0.02196088	41.8	0.010104	41.8	0.01285684	41.8	0.01675547	41.8	0.00555456	41.8	0.00727237	41.8	0.00528093	41.8	0.00791423	41.8	0.01390327	41.8	0.00966426	41.8	0.01697457	41.8	0.01374537	41.8	0.0140577	41.8	0.0141027	41.8	0.0111518	41.8	0.01580672
42	0.01435945	42	0.0069319	42	0.00922158	42	0.01910105	42	0.00863728	42	0.00867974	42	0.00888132	42	0.00619008	42	0.01493831	42	0.00874976	42	0.01812749	42	0.01181298	42	0.01762275	42	0.01518097	42	0.008546	42	0.01258357
42.2	0.01729985	42.2	0.00873055	42.2	0.00978566	42.2	0.01322496	42.2	0.0007667	42.2	0.00666299	42.2	0.00525489	42.2	0.00767417	42.2	0.01702459	42.2	0.01015321	42.2	0.01675313	42.2	0.00940734	42.2	0.01093728	42.2	0.01369077	42.2	0.01166533	42.2	0.01160997
42.4	0.01397124	42.4	0.00862592	42.4	0.0114128	42.4	0.01863116	42.4	0.00419072	42.4	0.00720491	42.4	0.00697343	42.4	0.01287291	42.4	0.01966673	42.4	0.0110127	42.4	0.01670077	42.4	0.01341939	42.4	0.01378179	42.4	0.01779095	42.4	0.00826341	42.4	0.01290449
42.6	0.01838641	42.6	0.01136061	42.6	0.0112025	42.6	0.02224165	42.6	0.00505324	42.6	0.01182909	42.6	0.00781139	42.6	0.00814646	42.6	0.01881498	42.6	0.0042401	42.6	0.01719003	42.6	0.01403031	42.6	0.01680968	42.6	0.01820375	42.6	0.01602782	42.6	0.01511556
42.8	0.01407288	42.8	0.0093047	42.8	0.00996604	42.8	0.01984366	42.8	0.00155596	42.8	0.00354813	42.8	0.01029034	42.8	0.01081938	42.8	0.01868103	42.8	0.00994625	42.8	0.01686321	42.8	0.01519338	42.8	0.01217163	42.8	0.01640417	42.8	0.01222512	42.8	0.01507846
43	0.01153695	43	0.00571163	43	0.00808061	43	0.0150016	43	0.00220197	43	0.00692119	43	0.01097795	43	0.00589275	43	0.01962727	43	0.01096043	43	0.02290293	43	0.01466743	43	0.01193975	43	0.01376779	43	0.0091308	43	0.01334065
43.2	0.01879268	43.2	0.00889934	43.2	0.01093638	43.2	0.0179401	43.2	0.00337384	43.2	0.00568124	43.2	0.01410586	43.2	0.00781679	43.2	0.02128087	43.2	0.01240373	43.2	0.01504849	43.2	0.01298253	43.2	0.01250964	43.2	0.01884905	43.2	0.01721749	43.2	0.01657028
43.4	0.01411333	43.4	0.00852917	43.4	0.00794827	43.4	0.02074076	43.4	0.00760305	43.4	0.00619345	43.4	0.00957918	43.4	0.0088992	43.4	0.01822902	43.4	0.00855348	43.4	0.020746	43.4	0.01290351	43.4	0.01138389	43.4	0.01462264	43.4	0.012675	43.4	0.0174199
43.6	0.01492559	43.6	0.00904498	43.6	0.00642198	43.6	0.023447	43.6	0.00737371	43.6	0.01221448	43.6	0.00807627	43.6	0.00719297	43.6	0.01635967	43.6	0.01434746	43.6	0.01726308	43.6	0.01374376	43.6	0.01636601	43.6	0.01935651	43.6	0.01502584	43.6	0.01263229
43.8	0.01389706	43.8	0.00701416	43.8	0.01234575	43.8	0.01823058	43.8	0.00349755	43.8	0.00831689	43.8	0.00873854	43.8	0.00665919	43.8	0.01887978	43.8	0.00809121	43.8	0.0156086	43.8	0.010368	43.8	0.01648543	43.8	0.01718258	43.8	0.01356941	43.8	0.01931624
44	0.01564748	44	0.01046698	44	0.00966683	44	0.01706477	44	0.0033268	44	0.00609175	44	0.00944732	44	0.01450534	44	0.01593281	44	0.0139956	44	0.01725332	44	0.01039679	44	0.01044768	44	0.01565011	44	0.01116436	44	0.00995061
44.2	0.01390041	44.2	0.006773	44.2	0.01107107	44.2	0.01808677	44.2	0.0058286	44.2	0.0071134	44.2	0.00489776	44.2	0.01554325	44.2	0.01683609	44.2	0.00800995	44.2	0.01399836	44.2	0.00871876	44.2	0.01129621	44.2	0.01750533	44.2	0.01245837	44.2	0.01224266
44.4	0.01259749	44.4	0.01119249	44.4	0.00853383	44.4	0.01795934	44.4	0.00517173	44.4	0.0017587	44.4	0.0084126	44.4	0.01013071	44.4	0.01598958	44.4	0.01029063	44.4	0.02014377	44.4	0.00800191	44.4	0.0090184	44.4	0.01826733	44.4	0.01253045	44.4	0.0141151
44.6	0.01657422	44.6	0.01219567	44.6	0.01111706	44.6	0.01528194	44.6	0.00626524	44.6	0.01450918	44.6	0.01142456	44.6	0.00686179	44.6	0.01581655	44.6	0.01354182	44.6	0.01521487	44.6	0.00907976	44.6	0.01096622	44.6	0.01688885	44.6	0.01859817	44.6	0.01208546
44.8	0.01847479	44.8	0.00915763	44.8	0.0100411	44.8	0.01326058	44.8	0.00601754	44.8	0.00842359	44.8	0.0092393	44.8	0.00971154	44.8	0.01731392	44.8	0.01353088	44.8	0.01946393	44.8	0.01329749	44.8	0.01370346	44.8	0.0182185	44.8	0.01227676	44.8	0.01076735
45	0.01654691	45	0.01086314	45	0.01038495	45	0.01155999	45	0.00729344	45	0.01190973	45	0.00950997	45	0.00709175	45	0.02374246	45	0.01070895	45	0.0195839	45	0.01648712	45	0.01194187	45	0.01631643	45	0.01286857	45	0.01675538
45.2	0.01999739	45.2	0.00791684	45.2	0.01112779	45.2	0.01703776	45.2	0.00451874	45.2	0.00692871	45.2	0.00908749	45.2	0.00692019	45.2	0.02145188	45.2	0.00829841	45.2	0.02102892	45.2	0.01178087	45.2	0.01377315	45.2	0.02060071	45.2	0.01363349	45.2	0.00900147
45.4	0.01559969	45.4	0.00720287	45.4	0.00647367	45.4	0.02000695	45.4	0.00584154	45.4	0.00826459	45.4	0.01312086	45.4	0.00653257	45.4	0.01434892	45.4	0.00857293	45.4	0.02080136	45.4	0.01457578	45.4	0.01259894	45.4	0.01787077	45.4	0.01280834	45.4	0.01285946
45.6	0.01884878	45.6	0.0042242	45.6	0.00573392	45.6	0.02052604	45.6	0.0085826	45.6	0.00651994	45.6	0.00863547	45.6	0.00969616	45.6	0.01624271	45.6	0.00899732	45.6	0.01551693	45.6	0.01083745	45.6	0.01375757	45.6	0.01733653	45.6	0.01544647	45.6	0.01382741
45.8	0.01835171	45.8	0.01027559	45.8	0.00880689	45.8	0.02017252	45.8	0.00915565	45.8	0.00863032	45.8	0.00681665	45.8	0.01126843	45.8	0.012162	45.8	0.0124381	45.8	0.01844041	45.8	0.01225311	45.8	0.01201292	45.8	0.01624245	45.8	0.01483205	45.8	0.01543999
46	0.01667617	46	0.01379999	46	0.01024858	46	0.01899061	46	0.00574385	46	0.00784685	46	0.0017028	46	0.00536941	46	0.01824161	46	0.01089799	46	0.01711628	46	0.01176218	46	0.01210285	46	0.01675197	46	0.01497595	46	0.01601146
46.2	0.01426116	46.2	0.00896236	46.2	0.00848375	46.2	0.01191407	46.2	0.00381419	46.2	0.00807255	46.2	0.00902167	46.2	0.00824762	46.2	0.01566804	46.2	0.01192822	46.2	0.0210078	46.2	0.01389198	46.2	0.01375656	46.2	0.0207663	46.2	0.01308038	46.2	0.0145379
46.4	0.01422974	46.4	0.01299277	46.4	0.01257453	46.4	0.01530359	46.4	0.00460002	46.4	0.00518402	46.4	0.01289389	46.4	0.01224102	46.4	0.01661942	46.4	0.01085912	46.4	0.01683067	46.4	0.01425117	46.4	0.01234988	46.4	0.01502297	46.4	0.01156107	46.4	0.01218306
46.6	0.01554141	46.6	0.00615847	46.6	0.00866162	46.6	0.01982627	46.6	0.00332265	46.6	0.0115916	46.6	0.00717286	46.6	0.00722684	46.6	0.0192508	46.6	0.01163468	46.6	0.02104106	46.6	0.01310086	46.6	0.01210116	46.6	0.01792145	46.6	0.01749709	46.6	0.01083883
46.8	0.01650947	46.8	0.00674954	46.8	0.00936723	46.8	0.0180427	46.8	0.00674153	46.8	0.00513241	46.8	0.00824774	46.8	0.00726662	46.8	0.01540339	46.8	0.01052397	46.8	0.02134424	46.8	0.01014215	46.8	0.01736447	46.8	0.0167137	46.8	0.01220493	46.8	0.01504495
47	0.01491091	47	0.01015457	47	0.01200785	47	0.02112306	47	0.00892706	47	0.00939514	47	0.00758665	47	0.01023192	47	0.01960271	47	0.01618547	47	0.01539623	47	0.01047948	47	0.01145096	47	0.01548551	47	0.01250718	47	0.01319382
47.2	0.01680156	47.2	0.01003609	47.2	0.01103762	47.2	0.01774015	47.2	0.00480105	47.2	0.00934774	47.2	0.00593708	47.2	0.00850868	47.2	0.01410362	47.2	0.01449137	47.2	0.02145886	47.2	0.01437977	47.2	0.01314164	47.2	0.01458341	47.2	0.01365114	47.2	0.01326474
47.4	0.01846697	47.4	0.0110325	47.4	0.01152835	47.4	0.01650741	47.4	0.00722375	47.4	0.00774159	47.4	0.00642336	47.4	0.01072443	47.4	0.01761594	47.4	0.01623499	47.4	0.0191249	47.4	0.01339361	47.4	0.01087073	47.4	0.01627305	47.4	0.01076623	47.4	0.01238179
47.6	0.01624795	47.6	0.00816627	47.6	0.01008535	47.6	0.0149291	47.6	0.00591442	47.6	0.00704797	47.6	0.0090326	47.6	0.01195418	47.6	0.01816284	47.6	0.01522617	47.6	0.01762958	47.6	0.01516651	47.6	0.01264913	47.6	0.01784493	47.6	0.01133789	47.6	0.018255
47.8	0.01725267	47.8	0.00878011	47.8	0.00745301	47.8	0.01780479	47.8	0.00758992	47.8	0.00895879	47.8	0.01079104	47.8	0.01093407	47.8	0.01936877	47.8	0.01510938	47.8	0.02027122	47.8	0.01439806	47.8	0.01448334	47.8	0.01776893	47.8	0.01375825	47.8	0.01756627
48	0.01431728	48	0.00740054	48	0.01123448	48	0.01797004	48	0.0023035	48	0.00862647	48	0.01234383	48	0.00259066	48	0.0172986	48	0.01060943	48	0.01493376	48	0.01310461	48	0.01648085	48	0.01832093	48	0.01525277	48	0.01469736
48.2	0.01515485	48.2	0.01477287	48.2	0.01064503	48.2	0.02201725	48.2	0.00334032	48.2	0.00328695	48.2	0.0131623	48.2	0.00791499	48.2	0.01975498	48.2	0.00833815	48.2	0.0155763	48.2	0.01579814	48.2	0.011279	48.2	0.02069119	48.2	0.01220926	48.2	0.01412932
48.4	0.01851452	48.4	0.0100319	48.4	0.01052256	48.4	0.01391365	48.4	0.00460339	48.4	0.00657314	48.4	0.00580965	48.4	0.01082594	48.4	0.01784335	48.4	0.00952863	48.4	0.01672097	48.4	0.01296192	48.4	0.01309824	48.4	0.0187007	48.4	0.01496903	48.4	0.01647794
48.61	0.01685356	48.61	0.00795614	48.61	0.0092085	48.61	0.01676267	48.61	0.00375857	48.61	0.01059917	48.61	0.00657893	48.61	0.01080449	48.6	0.01319604	48.6	0.01284395	48.6	0.01555486	48.6	0.01122317	48.6	0.0134222	48.6	0.0138261	48.6	0.01339175	48.6	0.01585697
48.8	0.01575006	48.8	0.01098452	48.8	0.00501107	48.8	0.01556147	48.8	0.00768142	48.8	0.00706023	48.8	0.01061335	48.8	0.0051359	48.8	0.01984177	48.8	0.01490879	48.8	0.01750013	48.8	0.01289034	48.8	0.01352507	48.8	0.01263174	48.8	0.01423714	48.8	0.01557425
49	0.01296931	49	0.01224838	49	0.01370163	49	0.01747255	49	0.00292362	49	0.00638294	49	0.0078814	49	0.00761808	49	0.01890407	49	0.01261588	49	0.02086635	49	0.0140463	49	0.01654902	49	0.01329633	49	0.00821636	49	0.01483929
49.2	0.01846348	49.2	0.0106393	49.2	0.00947306	49.2	0.02266107	49.2	0.00941211	49.2	0.00873093	49.2	0.00209916	49.2	0.01179791	49.2	0.01815992	49.2	0.01276952	49.2	0.01853597	49.2	0.01349596	49.2	0.0132238	49.2	0.01884072	49.2	0.01584331	49.2	0.01739645
49.4	0.01196519	49.4	0.00702225	49.4	0.00647925	49.4	0.02042623	49.4	0.01157839	49.4	0.00720995	49.4	0.00990852	49.4	0.01224363	49.4	0.01819485	49.4	0.01037651	49.4	0.01453243	49.4	0.01674443	49.4	0.01522037	49.4	0.01744848	49.4	0.01502984	49.4	0.01687337
49.6	0.01452915	49.6	0.00447134	49.6	0.01095846	49.6	0.02054789	49.6	0.00185857	49.6	0.00706948	49.6	0.01295996	49.6	0.00727269	49.6	0.01597714	49.6	0.01579511	49.6	0.02086356	49.6	0.01475356	49.6	0.01678779	49.6	0.01941892	49.6	0.01385037	49.6	0.01212858
49.8	0.01184526	49.8	0.00829451	49.8	0.01311016	49.8	0.02420728	49.8	0.00586131	49.8	0.00597422	49.8	0.00922551	49.8	0.01082939	49.8	0.01764787	49.8	0.01511761	49.8	0.01534977	49.8	0.01585335	49.8	0.00980626	49.8	0.01330991	49.8	0.01726079	49.8	0.01235175
50	0.01375031	50	0.00801614	50	0.00987655	50	0.01922671	50	0.0076476	50	0.01221259	50	0.00708131	50	0.01169146	50	0.01966038	50	0.01217555	50	0.02229462	50	0.01133477	50	0.01830353	50	0.01773511	50	0.01486283	50	0.01570566
50.2	0.01729301	50.2	0.0112799	50.2	0.01133109	50.2	0.0221819	50.2	0.00247968	50.2	0.00721776	50.2	0.01199488	50.2	0.00677965	50.2	0.01976597	50.2	0.01296315	50.2	0.01498641	50.2	0.01582874	50.2	0.01097752	50.2	0.01627431	50.2	0.01708551	50.2	0.01366731
50.4	0.01830497	50.4	0.01121829	50.4	0.01430934	50.4	0.01409635	50.4	0.00463668	50.4	0.00482793	50.4	0.00572379	50.4	0.01073106	50.4	0.01715432	50.4	0.01313259	50.4	0.01755321	50.4	0.01389859	50.4	0.0161306	50.4	0.01442036	50.4	0.01255529	50.4	0.01584493
50.6	0.01660803	50.6	0.01035084	50.6	0.00797053	50.6	0.0200655	50.6	0.00140906	50.6	0.01024768	50.6	0.00972852	50.6	0.00782176	50.6	0.02377728	50.6	0.01420191	50.6	0.01584258	50.6	0.01557808	50.6	0.0149522	50.6	0.02056837	50.6	0.0142441	50.6	0.01412249
50.8	0.01088511	50.8	0.00824928	50.8	0.00849611	50.8	0.02041333	50.8	0.00819103	50.8	0.00654218	50.8	0.00908226	50.8	0.0077464	50.8	0.01621403	50.8	0.00947564	50.8	0.01573103	50.8	0.01466391	50.8	0.01793266	50.8	0.01888599	50.8	0.01505946	50.8	0.01518638
51	0.0176717	51	0.01028411	51	0.00831414	51	0.02199546	51	0.00023335	51	0.01502921	51	0.01007711	51	0.01056358	51	0.01835641	51	0.01219329	51	0.01571351	51	0.01049591	51	0.01769892	51	0.02007391	51	0.01604231	51	0.01221782
51.2	0.0189624	51.2	0.0123227	51.2	0.01184408	51.2	0.02273794	51.2	0.00749512	51.2	0.00959467	51.2	0.01479785	51.2	0.01036844	51.2	0.02144439	51.2	0.01393826	51.2	0.01891138	51.2	0.01806218	51.2	0.01540245	51.2	0.01973107	51.2	0.01434555	51.2	0.0095369
51.4	0.0165408	51.4	0.01014851	51.4	0.01222396	51.4	0.01912633	51.4	0.00710685	51.4	0.01094655	51.4	0.01098938	51.4	0.00836593	51.4	0.01797872	51.4	0.01254213	51.4	0.0159185	51.4	0.01260697	51.4	0.0118257	51.4	0.01557005	51.4	0.01492998	51.4	0.01742708
51.6	0.0162745	51.6	0.00864579	51.6	0.01016998	51.6	0.01568502	51.6	0.00506806	51.6	0.00941658	51.6	0.0116833	51.6	0.00900586	51.6	0.01672812	51.6	0.01264747	51.6	0.01808895	51.6	0.01424606	51.6	0.01687017	51.6	0.01683604	51.6	0.01407383	51.6	0.01506886
51.8	0.01444153	51.8	0.01030706	51.8	0.00629472	51.8	0.01883935	51.8	0.00989062	51.8	0.00816703	51.8	0.00892605	51.8	0.00482434	51.8	0.02006622	51.8	0.01573259	51.8	0.0214899	51.8	0.01490153	51.8	0.01542102	51.8	0.01865953	51.8	0.012866	51.8	0.01397643
52	0.01798401	52	0.01108224	52	0.01187778	52	0.02024825	52	0.00474149	52	0.0071355	52	0.00758044	52	0.01071016	52	0.02054739	52	0.01000778	52	0.01824331	52	0.0148563	52	0.02016718	52	0.01788382	52	0.01100021	52	0.01079408
52.2	0.01685882	52.2	0.00993951	52.2	0.00897311	52.2	0.01966032	52.2	0.00643424	52.2	0.00899294	52.2	0.0101098	52.2	0.01085402	52.2	0.01931677	52.2	0.01318211	52.2	0.02000996	52.2	0.01383319	52.2	0.01038897	52.2	0.0153286	52.2	0.01525704	52.2	0.01328643
52.4	0.01978919	52.4	0.0103176	52.4	0.00962166	52.4	0.02196	52.4	0.00602659	52.4	0.00862303	52.4	0.00644209	52.4	0.00872383	52.4	0.01479882	52.4	0.01178154	52.4	0.01737479	52.4	0.01495691	52.4	0.01162049	52.4	0.01883451	52.4	0.01674686	52.4	0.0166317
52.6	0.01604576	52.6	0.00922817	52.6	0.01415898	52.6	0.02304779	52.6	0.00553249	52.6	0.01017096	52.6	0.00558938	52.6	0.00792224	52.6	0.02205335	52.6	0.01291879	52.6	0.01944417	52.6	0.0153153	52.6	0.01194836	52.6	0.01765626	52.6	0.01464448	52.6	0.01244648
52.8	0.01743961	52.8	0.01303612	52.8	0.00978337	52.8	0.02479787	52.8	0.00213753	52.8	0.00572119	52.8	0.00894853	52.8	0.01163581	52.8	0.01995242	52.8	0.01777164	52.8	0.01767477	52.8	0.01273287	52.8	0.015448	52.8	0.02109236	52.8	0.01473807	52.8	0.01210168
53	0.02043035	53	0.00835515	53	0.00905652	53	0.0198007	53	0.00360338	53	0.01172534	53	0.0079823	53	0.00904391	53	0.02062779	53	0.01134879	53	0.01934279	53	0.01505257	53	0.01260377	53	0.01718169	53	0.01678016	53	0.01421062
53.2	0.01726965	53.2	0.01263775	53.2	0.01366177	53.2	0.01925397	53.2	0.00307951	53.2	0.0102733	53.2	0.00504306	53.2	0.00453944	53.2	0.02019012	53.2	0.01565509	53.2	0.02155	53.2	0.01713856	53.2	0.01675448	53.2	0.01713689	53.2	0.01268251	53.2	0.01210873
53.4	0.01653378	53.4	0.01242227	53.4	0.00961705	53.4	0.01814338	53.4	0.00599231	53.4	0.01006669	53.4	0.00626836	53.4	0.01109379	53.4	0.01443715	53.4	0.00925588	53.4	0.01995477	53.4	0.01657289	53.4	0.01312202	53.4	0.01858842	53.4	0.01211695	53.4	0.01302344
53.6	0.01621371	53.6	0.00690035	53.6	0.01463551	53.6	0.01916648	53.6	0.00642914	53.6	0.00844937	53.6	0.0079143	53.6	0.01082888	53.6	0.02068015	53.6	0.01235586	53.6	0.02070498	53.6	0.0109722	53.6	0.01376652	53.6	0.01924432	53.6	0.02127145	53.6	0.01266329
53.82	0.01675558	53.82	0.01110332	53.82	0.01169498	53.82	0.02223821	53.82	0.00558523	53.82	0.00731541	53.82	0.01139795	53.82	0.00902333	53.8	0.01855317	53.8	0.01436576	53.8	0.02021082	53.8	0.01560263	53.8	0.01389326	53.8	0.02004591	53.8	0.01771124	53.8	0.0131077
54	0.01348044	54	0.00624189	54	0.01072293	54	0.01917504	54	0.00597564	54	0.00698311	54	0.00869667	54	0.01076722	54	0.02193293	54	0.01822482	54	0.02145479	54	0.01275752	54	0.01657967	54	0.01850204	54	0.01569292	54	0.01065488
54.2	0.01568624	54.2	0.00937101	54.2	0.00748375	54.2	0.02093305	54.2	0.00560779	54.2	0.00710348	54.2	0.00880862	54.2	0.00744747	54.2	0.01708339	54.2	0.01514973	54.2	0.01954504	54.2	0.01124486	54.2	0.01646652	54.2	0.01733326	54.2	0.00964575	54.2	0.01494282
54.4	0.01528052	54.4	0.00971532	54.4	0.00960977	54.4	0.02063794	54.4	0.00471799	54.4	0.00915975	54.4	0.00597023	54.4	0.01008592	54.4	0.01483211	54.4	0.01300808	54.4	0.01968856	54.4	0.01606946	54.4	0.01753523	54.4	0.01854262	54.4	0.01966914	54.4	0.01227054
54.6	0.01375259	54.6	0.00648951	54.6	0.01200603	54.6	0.02041725	54.6	0.0040281	54.6	0.00749877	54.6	0.00804505	54.6	0.00595895	54.6	0.01832807	54.6	0.01741973	54.6	0.018155	54.6	0.01299851	54.6	0.01323823	54.6	0.01844836	54.6	0.01520496	54.6	0.01681672
54.8	0.01290519	54.8	0.009871	54.8	0.00626593	54.8	0.01614577	54.8	-0.0003116	54.8	0.00824251	54.8	0.0089299	54.8	0.0072932	54.8	0.01903757	54.8	0.01399964	54.8	0.02018424	54.8	0.0170517	54.8	0.01830367	54.8	0.01930565	54.8	0.01380213	54.8	0.01628746
55	0.01951507	55	0.01263065	55	0.01011185	55	0.01629343	55	0.00605804	55	0.00859809	55	0.00464573	55	0.01237963	55	0.02061511	55	0.01447926	55	0.01904737	55	0.01323529	55	0.01481393	55	0.01999622	55	0.01789474	55	0.01737103
55.2	0.01901406	55.2	0.01666447	55.2	0.01108284	55.2	0.01801033	55.2	0.00525257	55.2	0.00728216	55.2	0.01369499	55.2	0.01145686	55.2	0.01449476	55.2	0.01521289	55.2	0.02106053	55.2	0.01165904	55.2	0.01661552	55.2	0.02186717	55.2	0.01460339	55.2	0.01257424
55.4	0.02034277	55.4	0.00714131	55.4	0.01157283	55.4	0.020165	55.4	0.00764985	55.4	0.00536129	55.4	0.0021283	55.4	0.00853478	55.4	0.02215799	55.4	0.01437616	55.4	0.01763713	55.4	0.01337114	55.4	0.01293584	55.4	0.01918748	55.4	0.01443586	55.4	0.0137931
55.6	0.01319894	55.6	0.00934672	55.6	0.01168008	55.6	0.02106685	55.6	0.00287238	55.6	0.00816409	55.6	0.00983846	55.6	0.01017112	55.6	0.01996709	55.6	0.01158778	55.6	0.02066259	55.6	0.01545403	55.6	0.01899135	55.6	0.02001096	55.6	0.01492022	55.6	0.01467703
55.8	0.01757459	55.8	0.01238834	55.8	0.01213993	55.8	0.02257082	55.8	0.00094797	55.8	0.00745628	55.8	0.00581997	55.8	0.00866106	55.8	0.02342372	55.8	0.01033343	55.8	0.02112077	55.8	0.01340726	55.8	0.01773883	55.8	0.01368367	55.8	0.01410095	55.8	0.01721524
56	0.01542668	56	0.00493813	56	0.0105882	56	0.02128403	56	0.00485533	56	0.00763381	56	0.00621605	56	0.00979428	56	0.01976997	56	0.01486869	56	0.02098966	56	0.01569723	56	0.01272171	56	0.01936281	56	0.01428495	56	0.01165254
56.2	0.01636291	56.2	0.01182816	56.2	0.00866023	56.2	0.02168913	56.2	0.00594293	56.2	0.00885486	56.2	0.0086377	56.2	0.00912154	56.2	0.02360027	56.2	0.01440589	56.2	0.02203702	56.2	0.01603641	56.2	0.0118076	56.2	0.01966186	56.2	0.01089248	56.2	0.01318713
56.4	0.01775688	56.4	0.01028827	56.4	0.01091104	56.4	0.02160688	56.4	0.0079779	56.4	0.00747968	56.4	0.00592156	56.4	0.01291771	56.4	0.01808262	56.4	0.01737142	56.4	0.02457715	56.4	0.01721762	56.4	0.01407959	56.4	0.01407383	56.4	0.01651546	56.4	0.01729889
56.6	0.01604423	56.6	0.01298528	56.6	0.01025778	56.6	0.02285957	56.6	0.00752648	56.6	0.00838138	56.6	0.00669223	56.6	0.01157705	56.6	0.02109179	56.6	0.0169894	56.6	0.02009561	56.6	0.01737624	56.6	0.01935765	56.6	0.01961144	56.6	0.0163597	56.6	0.00698978
56.8	0.01436539	56.8	0.0072815	56.8	0.0121908	56.8	0.02181842	56.8	0.00104681	56.8	0.01074645	56.8	0.00704328	56.8	0.00949849	56.8	0.01770242	56.8	0.01583269	56.8	0.02119429	56.8	0.01295764	56.8	0.01609295	56.8	0.01929827	56.8	0.01151427	56.8	0.01477984
57	0.01783914	57	0.01410525	57	0.00802897	57	0.02313923	57	0.00589667	57	0.00532429	57	0.01142765	57	0.01359854	57	0.01847987	57	0.01686141	57	0.01880045	57	0.01730822	57	0.01545656	57	0.02146036	57	0.01342682	57	0.01401308
57.2	0.01541124	57.2	0.01199393	57.2	0.00980763	57.2	0.02143578	57.2	0.00684308	57.2	0.00374668	57.2	0.00530591	57.2	0.01056039	57.2	0.0164375	57.2	0.01497216	57.2	0.02033193	57.2	0.01542203	57.2	0.01651882	57.2	0.01563712	57.2	0.01512264	57.2	0.01722505
57.4	0.01891475	57.4	0.00646507	57.4	0.01553784	57.4	0.02411314	57.4	0.00329671	57.4	0.01155841	57.4	0.01103131	57.4	0.0081542	57.4	0.02413916	57.4	0.01496104	57.4	0.02212815	57.4	0.0193932	57.4	0.01086325	57.4	0.01995297	57.4	0.01231543	57.4	0.01267756
57.6	0.01793878	57.6	0.01141001	57.6	0.00997723	57.6	0.01970977	57.6	0.00813567	57.6	0.00819199	57.6	0.00622626	57.6	0.00702584	57.6	0.0159598	57.6	0.01365565	57.6	0.02109115	57.6	0.01663592	57.6	0.01496859	57.6	0.02199847	57.6	0.01532832	57.6	0.01907918
57.8	0.01356087	57.8	0.01204533	57.8	0.00955329	57.8	0.0215159	57.8	0.00658468	57.8	0.00732798	57.8	0.00639567	57.8	0.00570827	57.8	0.01957141	57.8	0.01538566	57.8	0.02232569	57.8	0.01545165	57.8	0.01841623	57.8	0.01483669	57.8	0.01244066	57.8	0.01336584
58	0.01772728	58	0.01318437	58	0.00901537	58	0.01977148	58	0.00320881	58	0.01045806	58	0.00878021	58	0.0070254	58	0.01686904	58	0.01560387	58	0.01608237	58	0.01669203	58	0.01472909	58	0.0180346	58	0.01109218	58	0.01627807
58.2	0.01696267	58.2	0.00588517	58.2	0.01155315	58.2	0.0214531	58.2	0.00634643	58.2	0.01110663	58.2	0.00545843	58.2	0.00666998	58.2	0.01993746	58.2	0.01084173	58.2	0.02004763	58.2	0.01529068	58.2	0.01892888	58.2	0.02103337	58.2	0.01756103	58.2	0.01389305
58.4	0.0131719	58.4	0.01244191	58.4	0.00776896	58.4	0.01569089	58.4	0.00750114	58.4	0.00858493	58.4	0.00754929	58.4	0.00652975	58.4	0.0168322	58.4	0.01445673	58.4	0.02174523	58.4	0.01530046	58.4	0.01374502	58.4	0.01413795	58.4	0.01855318	58.4	0.01599135
58.6	0.01590446	58.6	0.01329676	58.6	0.01121966	58.6	0.01967642	58.6	0.00411758	58.6	0.00761641	58.6	0.00963161	58.6	0.00902267	58.6	0.01783933	58.6	0.01161212	58.6	0.02138516	58.6	0.01361168	58.6	0.01467409	58.6	0.02567573	58.6	0.01494741	58.6	0.01568351
58.8	0.01402848	58.8	0.00946089	58.8	0.01069686	58.8	0.01913207	58.8	0.00524836	58.8	0.00689504	58.8	0.00879466	58.8	0.00704827	58.8	0.01672262	58.8	0.01550476	58.8	0.02299045	58.8	0.01595594	58.8	0.01039235	58.8	0.02210767	58.8	0.01654243	58.8	0.01778136
59	0.01679016	59	0.01422526	59	0.01300551	59	0.01864127	59	0.00639692	59	0.01048229	59	0.01043552	59	0.00943761	59	0.02110532	59	0.01238335	59	0.01634173	59	0.01653656	59	0.01748457	59	0.02500422	59	0.01474216	59	0.00606887
59.2	0.01762858	59.2	0.0076897	59.2	0.01439695	59.2	0.01913275	59.2	0.00761348	59.2	0.00994892	59.2	0.00248039	59.2	0.00821653	59.2	0.0203888	59.2	0.01036816	59.2	0.02140585	59.2	0.0183813	59.2	0.01944757	59.2	0.01951215	59.2	0.01563606	59.2	0.01489439
59.4	0.01659167	59.4	0.01132823	59.4	0.00976035	59.4	0.01964356	59.4	0.00314584	59.4	0.00779238	59.4	0.01017621	59.4	0.01034486	59.4	0.0194693	59.4	0.01748272	59.4	0.02305269	59.4	0.0218565	59.4	0.01784802	59.4	0.02188962	59.4	0.01519382	59.4	0.01103026
59.6	0.01697407	59.6	0.00904731	59.6	0.00982892	59.6	0.02119415	59.6	0.00862465	59.6	0.00913837	59.6	0.00666152	59.6	0.01534574	59.6	0.0200971	59.6	0.01581837	59.6	0.01748727	59.6	0.01325149	59.6	0.01535541	59.6	0.02042309	59.6	0.01700859	59.6	0.01065712
59.8	0.01535959	59.8	0.01272809	59.8	0.01183907	59.8	0.02530884	59.8	0.00531421	59.8	0.01123723	59.8	0.00840128	59.8	0.01073233	59.8	0.02223235	59.8	0.01348671	59.8	0.02202702	59.8	0.01339306	59.8	0.01401876	59.8	0.01493656	59.8	0.01680822	59.8	0.01030627
60	-4.077757	60	-4.165355	60	-4.408917	60	-4.319216	60	-4.23149	60	-4.33031	60	-4.301673	60	-3.960458	60	-3.793308	60	-3.890728	60	-3.845135	60	-3.800005	60	-3.691237	60	-3.746783	60	-3.765164	60	-3.690915
60.2	-4.39739	60.2	-4.496189	60.2	-4.655527	60.2	-4.595498	60.2	-4.523581	60.2	-4.612198	60.2	-4.586272	60.2	-4.318974	60.2	-4.170482	60.2	-4.23998	60.2	-4.242496	60.2	-4.198101	60.2	-4.099278	60.2	-4.134412	60.2	-4.169401	60.2	-4.111277
60.4	-4.595294	60.4	-4.705806	60.4	-4.819286	60.4	-4.784225	60.4	-4.707176	60.4	-4.80572	60.4	-4.777114	60.4	-4.534658	60.4	-4.374436	60.4	-4.445262	60.4	-4.452681	60.4	-4.402465	60.4	-4.315461	60.4	-4.336276	60.4	-4.37799	60.4	-4.31631
60.6	-4.714634	60.6	-4.826538	60.6	-4.921872	60.6	-4.899257	60.6	-4.831565	60.6	-4.922231	60.6	-4.898959	60.6	-4.666271	60.6	-4.508067	60.6	-4.583207	60.6	-4.583426	60.6	-4.545153	60.6	-4.452482	60.6	-4.472447	60.6	-4.515464	60.6	-4.456195
60.8	-4.82203	60.8	-4.928771	60.8	-5.023911	60.8	-4.993939	60.8	-4.936877	60.8	-5.026735	60.8	-4.998015	60.8	-4.772943	60.8	-4.610877	60.8	-4.692868	60.8	-4.688527	60.8	-4.642875	60.8	-4.560906	60.8	-4.57014	60.8	-4.62254	60.8	-4.566025
61	-4.903734	61	-5.010026	61	-5.093695	61	-5.073753	61	-5.015332	61	-5.10428	61	-5.081786	61	-4.861786	61	-4.690529	61	-4.780309	61	-4.773673	61	-4.730677	61	-4.642988	61	-4.661202	61	-4.70943	61	-4.653514
61.2	-4.980379	61.2	-5.089523	61.2	-5.161714	61.2	-5.144888	61.2	-5.082715	61.2	-5.174574	61.2	-5.148636	61.2	-4.934697	61.2	-4.763911	61.2	-4.852195	61.2	-4.846972	61.2	-4.805958	61.2	-4.71034	61.2	-4.728042	61.2	-4.780298	61.2	-4.71656
61.4	-5.037024	61.4	-5.147319	61.4	-5.215166	61.4	-5.203466	61.4	-5.141424	61.4	-5.230335	61.4	-5.210054	61.4	-4.996574	61.4	-4.823409	61.4	-4.905649	61.4	-4.905875	61.4	-4.865542	61.4	-4.771353	61.4	-4.78361	61.4	-4.839761	61.4	-4.781225
61.6	-5.085348	61.6	-5.196863	61.6	-5.26412	61.6	-5.256431	61.6	-5.193995	61.6	-5.282595	61.6	-5.261979	61.6	-5.046857	61.6	-4.882567	61.6	-4.965734	61.6	-4.960137	61.6	-4.917661	61.6	-4.820651	61.6	-4.839662	61.6	-4.896025	61.6	-4.83919
61.8	-5.133975	61.8	-5.244629	61.8	-5.31029	61.8	-5.301634	61.8	-5.244061	61.8	-5.332505	61.8	-5.311427	61.8	-5.102532	61.8	-4.919291	61.8	-5.010545	61.8	-5.006052	61.8	-4.967041	61.8	-4.869677	61.8	-4.881227	61.8	-4.9475	61.8	-4.883741
62	-5.173074	62	-5.292784	62	-5.349832	62	-5.34184	62	-5.280389	62	-5.373587	62	-5.342692	62	-5.140371	62	-4.968743	62	-5.046967	62	-5.041319	62	-5.007923	62	-4.910233	62	-4.926166	62	-4.980399	62	-4.92159
62.2	-5.210008	62.2	-5.331127	62.2	-5.385614	62.2	-5.380995	62.2	-5.316849	62.2	-5.407289	62.2	-5.387715	62.2	-5.177028	62.2	-5.007531	62.2	-5.088424	62.2	-5.085614	62.2	-5.041694	62.2	-4.948546	62.2	-4.961453	62.2	-5.023507	62.2	-4.960392
62.4	-5.252739	62.4	-5.359028	62.4	-5.416644	62.4	-5.414431	62.4	-5.359086	62.4	-5.443164	62.4	-5.419719	62.4	-5.219479	62.4	-5.032902	62.4	-5.119324	62.4	-5.119494	62.4	-5.078801	62.4	-4.984433	62.4	-4.996644	62.4	-5.056564	62.4	-4.992259
62.6	-5.2726	62.6	-5.398883	62.6	-5.446118	62.6	-5.443202	62.6	-5.385099	62.6	-5.477715	62.6	-5.457509	62.6	-5.248016	62.6	-5.070073	62.6	-5.154369	62.6	-5.148706	62.6	-5.113226	62.6	-5.012645	62.6	-5.026338	62.6	-5.088735	62.6	-5.025708
62.8	-5.305655	62.8	-5.419969	62.8	-5.48239	62.8	-5.47223	62.8	-5.410618	62.8	-5.503328	62.8	-5.482338	62.8	-5.273906	62.8	-5.097057	62.8	-5.183544	62.8	-5.177163	62.8	-5.137632	62.8	-5.039148	62.8	-5.051106	62.8	-5.115265	62.8	-5.055545
63	-5.333686	63	-5.450322	63	-5.496655	63	-5.493804	63	-5.443392	63	-5.528133	63	-5.5105	63	-5.305242	63	-5.118783	63	-5.207897	63	-5.202015	63	-5.158982	63	-5.061039	63	-5.076298	63	-5.140295	63	-5.084636
63.2	-5.356325	63.2	-5.478166	63.2	-5.527229	63.2	-5.523593	63.2	-5.466448	63.2	-5.560966	63.2	-5.534983	63.2	-5.325191	63.2	-5.145762	63.2	-5.226437	63.2	-5.225973	63.2	-5.187732	63.2	-5.088016	63.2	-5.098734	63.2	-5.15932	63.2	-5.106833
63.4	-5.381883	63.4	-5.502906	63.4	-5.550107	63.4	-5.546029	63.4	-5.489578	63.4	-5.578826	63.4	-5.5603	63.4	-5.349157	63.4	-5.168347	63.4	-5.255934	63.4	-5.251921	63.4	-5.210643	63.4	-5.1114	63.4	-5.11972	63.4	-5.18722	63.4	-5.128954
63.6	-5.407255	63.6	-5.523634	63.6	-5.569393	63.6	-5.563618	63.6	-5.515042	63.6	-5.600712	63.6	-5.579294	63.6	-5.372934	63.6	-5.186837	63.6	-5.272542	63.6	-5.271446	63.6	-5.233199	63.6	-5.135909	63.6	-5.142885	63.6	-5.209254	63.6	-5.150286
63.8	-5.422584	63.8	-5.543771	63.8	-5.593683	63.8	-5.5842	63.8	-5.526242	63.8	-5.620227	63.8	-5.604321	63.8	-5.393291	63.8	-5.207086	63.8	-5.291732	63.8	-5.287322	63.8	-5.250237	63.8	-5.14759	63.8	-5.161476	63.8	-5.227897	63.8	-5.166845
64	-5.441943	64	-5.565614	64	-5.607665	64	-5.607295	64	-5.556886	64	-5.643892	64	-5.62161	64	-5.407975	64	-5.230896	64	-5.320381	64	-5.309739	64	-5.268944	64	-5.168625	64	-5.184431	64	-5.249433	64	-5.191385
64.2	-5.466456	64.2	-5.579107	64.2	-5.624862	64.2	-5.625753	64.2	-5.5726	64.2	-5.65992	64.2	-5.639358	64.2	-5.434772	64.21	-5.24858	64.21	-5.331224	64.21	-5.325983	64.21	-5.293438	64.21	-5.18859	64.21	-5.201112	64.21	-5.270926	64.21	-5.203851
64.4	-5.481457	64.4	-5.598536	64.4	-5.64172	64.4	-5.641082	64.4	-5.582132	64.4	-5.674759	64.4	-5.654235	64.4	-5.443259	64.4	-5.260759	64.4	-5.348763	64.4	-5.341297	64.4	-5.306204	64.4	-5.202706	64.4	-5.213797	64.4	-5.281514	64.4	-5.221688
64.6	-5.490409	64.6	-5.611989	64.6	-5.654974	64.6	-5.653815	64.6	-5.59364	64.6	-5.691503	64.6	-5.672139	64.6	-5.461858	64.6	-5.272203	64.6	-5.355254	64.6	-5.353615	64.6	-5.313731	64.6	-5.216728	64.6	-5.22375	64.6	-5.299633	64.6	-5.235945
64.8	-5.502015	64.8	-5.62164	64.8	-5.662361	64.8	-5.663467	64.8	-5.609624	64.8	-5.70201	64.8	-5.68346	64.8	-5.470406	64.8	-5.282428	64.8	-5.36371	64.8	-5.368246	64.8	-5.327899	64.8	-5.225341	64.8	-5.23789	64.8	-5.305776	64.8	-5.247277
65	-1.02938	65	-1.055359	65	-1.048008	65	-1.046903	65	-1.048018	65	-1.046359	65	-1.041343	65	-1.011347	65	-0.9684538	65	-0.9924946	65	-0.9709958	65	-0.9518316	65	-0.9410172	65	-0.9292129	65	-0.9342408	65	-0.9360588
65.2	-0.9891607	65.2	-1.00884	65.2	-1.003932	65.2	-0.9981194	65.2	-1.000104	65.2	-1.001948	65.2	-0.9941494	65.2	-0.969731	65.2	-0.9268143	65.2	-0.9474824	65.2	-0.9236515	65.2	-0.9094415	65.2	-0.9045118	65.2	-0.889116	65.2	-0.8981821	65.2	-0.900776
65.4	-0.9487734	65.4	-0.9678625	65.4	-0.9610993	65.4	-0.9571424	65.4	-0.9598625	65.4	-0.9586691	65.4	-0.9546109	65.4	-0.9224129	65.4	-0.8795443	65.4	-0.9046624	65.4	-0.8885503	65.4	-0.8684249	65.4	-0.8647318	65.4	-0.8513296	65.4	-0.8571675	65.4	-0.8649387
65.6	-0.9085799	65.6	-0.9346578	65.6	-0.9298624	65.6	-0.9279301	65.6	-0.9281245	65.6	-0.9292594	65.6	-0.9181148	65.6	-0.8894657	65.6	-0.8453413	65.6	-0.8774552	65.6	-0.8459858	65.6	-0.8315436	65.6	-0.8338174	65.6	-0.8160262	65.6	-0.8212864	65.6	-0.8334217
65.8	-0.8830686	65.8	-0.9048513	65.8	-0.8995708	65.8	-0.8996517	65.8	-0.8982961	65.8	-0.8983496	65.8	-0.8928887	65.8	-0.869032	65.8	-0.8162825	65.8	-0.8477631	65.8	-0.8210645	65.8	-0.8066584	65.8	-0.80335	65.8	-0.783015	65.8	-0.7941702	65.8	-0.8055549
66	-0.8668066	66	-0.8802206	66	-0.8780577	66	-0.86924	66	-0.8770347	66	-0.8716813	66	-0.8700232	66	-0.8411447	66	-0.7962167	66	-0.8233124	66	-0.7962267	66	-0.7839411	66	-0.7807027	66	-0.7618598	66	-0.7786976	66	-0.7789404
66.2	-0.8393164	66.2	-0.8630695	66.2	-0.8582988	66.2	-0.8489309	66.2	-0.8582936	66.2	-0.8600938	66.2	-0.8501286	66.2	-0.8226206	66.2	-0.7778277	66.2	-0.8027857	66.2	-0.7793074	66.2	-0.7634625	66.2	-0.7641822	66.2	-0.7446361	66.2	-0.7543113	66.2	-0.7544827
66.4	-0.8226091	66.4	-0.844707	66.4	-0.834549	66.4	-0.8341358	66.4	-0.8390199	66.4	-0.8377978	66.4	-0.8293932	66.4	-0.8011854	66.4	-0.7537428	66.4	-0.7859656	66.4	-0.7665413	66.4	-0.7446993	66.4	-0.7418643	66.4	-0.7263876	66.4	-0.735478	66.4	-0.7449535
66.6	-0.8159026	66.6	-0.834304	66.6	-0.827667	66.6	-0.8167375	66.6	-0.8250926	66.6	-0.8239726	66.6	-0.8227621	66.6	-0.7883869	66.6	-0.7458894	66.6	-0.7726181	66.6	-0.7439574	66.6	-0.7264764	66.6	-0.7323813	66.6	-0.7131885	66.6	-0.7220275	66.6	-0.7251242
66.8	-0.7950062	66.8	-0.8156705	66.8	-0.8078134	66.8	-0.8078955	66.8	-0.8152804	66.8	-0.8087609	66.8	-0.8032511	66.8	-0.7803262	66.8	-0.73099	66.8	-0.7612014	66.8	-0.7362454	66.8	-0.7145249	66.8	-0.7169783	66.8	-0.6972684	66.8	-0.7056711	66.8	-0.7151687
67	-0.783687	67	-0.8097661	67	-0.797208	67	-0.7963818	67	-0.8008754	67	-0.7988626	67	-0.7947782	67	-0.7644995	67	-0.7211862	67	-0.746339	67	-0.7207298	67	-0.7043313	67	-0.703714	67	-0.6830558	67	-0.6938643	67	-0.6971959
67.2	-0.7750257	67.2	-0.7991313	67.2	-0.7875247	67.2	-0.7767899	67.2	-0.7912031	67.2	-0.782847	67.2	-0.7799746	67.2	-0.7564453	67.2	-0.7046707	67.2	-0.7307417	67.2	-0.7067163	67.2	-0.6971275	67.2	-0.6938019	67.2	-0.6795317	67.2	-0.6874108	67.2	-0.6919214
67.4	-0.7560676	67.4	-0.7887478	67.4	-0.7729952	67.4	-0.7695733	67.4	-0.7806331	67.4	-0.7775857	67.4	-0.7692055	67.4	-0.7425758	67.4	-0.6955814	67.4	-0.721866	67.4	-0.6975721	67.4	-0.6828263	67.4	-0.6834431	67.4	-0.6642417	67.4	-0.6763668	67.4	-0.6780145
67.6	-0.7531472	67.6	-0.7779234	67.6	-0.7676836	67.6	-0.7599617	67.6	-0.7687414	67.6	-0.7633023	67.6	-0.764725	67.6	-0.733197	67.6	-0.6870722	67.6	-0.7096084	67.6	-0.6886789	67.6	-0.6761491	67.6	-0.6720241	67.6	-0.6583863	67.6	-0.6675601	67.6	-0.6752945
67.8	-0.7392966	67.8	-0.7707188	67.8	-0.7564651	67.8	-0.7557153	67.8	-0.7602015	67.8	-0.7556496	67.8	-0.751119	67.8	-0.7222487	67.8	-0.6734937	67.8	-0.7044719	67.8	-0.6813477	67.8	-0.6700304	67.8	-0.6676913	67.8	-0.6505774	67.8	-0.6603278	67.8	-0.6660683
68	-0.734902	68	-0.7660877	68	-0.7445765	68	-0.7457941	68	-0.756244	68	-0.7563729	68	-0.7416095	68	-0.7209032	68	-0.6749646	68	-0.6977916	68	-0.6737359	68	-0.6629028	68	-0.658916	68	-0.6414663	68	-0.6529295	68	-0.6545424
68.2	-0.727677	68.2	-0.7508059	68.2	-0.7408094	68.2	-0.737783	68.2	-0.7498232	68.2	-0.7414519	68.2	-0.7368493	68.2	-0.7134095	68.2	-0.6679273	68.2	-0.6914059	68.2	-0.6605195	68.2	-0.6525536	68.2	-0.6508871	68.2	-0.6350024	68.2	-0.644856	68.2	-0.6467825
68.4	-0.7209963	68.4	-0.7459638	68.4	-0.7335531	68.4	-0.7267128	68.4	-0.7397949	68.4	-0.7358567	68.4	-0.7241291	68.4	-0.7010295	68.4	-0.654195	68.4	-0.6852024	68.4	-0.6611327	68.4	-0.6490139	68.4	-0.6397049	68.4	-0.6283096	68.4	-0.6327152	68.4	-0.6360879
68.6	-0.7188281	68.6	-0.7362338	68.6	-0.7321909	68.6	-0.7255756	68.6	-0.7292638	68.6	-0.7295583	68.6	-0.723747	68.6	-0.7011684	68.6	-0.6556149	68.6	-0.6787953	68.6	-0.6502447	68.6	-0.6330593	68.6	-0.6351244	68.6	-0.6213083	68.6	-0.6298816	68.6	-0.6340821
68.8	-0.7085658	68.8	-0.7324252	68.8	-0.7194558	68.8	-0.7161404	68.8	-0.7210634	68.8	-0.723659	68.8	-0.7145839	68.8	-0.6892843	68.8	-0.6482856	68.8	-0.665961	68.8	-0.6463497	68.8	-0.6275723	68.8	-0.6315311	68.8	-0.61646	68.8	-0.6234075	68.8	-0.6260167
69	-0.6956928	69	-0.7293785	69	-0.7158287	69	-0.7140799	69	-0.7208141	69	-0.7198021	69	-0.7127799	69	-0.688077	69	-0.6385173	69	-0.6659787	69	-0.6420186	69	-0.6282729	69	-0.6273177	69	-0.6075411	69	-0.6172974	69	-0.6192569
69.2	-0.6999627	69.2	-0.7186894	69.2	-0.7129208	69.2	-0.704839	69.2	-0.7165232	69.2	-0.7106627	69.2	-0.7013834	69.2	-0.6798579	69.2	-0.6335514	69.2	-0.6590195	69.2	-0.6313552	69.2	-0.6231504	69.2	-0.6191981	69.2	-0.6026134	69.2	-0.6134413	69.2	-0.6134235
69.4	-0.6936446	69.4	-0.7142712	69.4	-0.7052852	69.4	-0.6971336	69.4	-0.709444	69.4	-0.7051257	69.4	-0.6985434	69.4	-0.6738667	69.4	-0.6274458	69.4	-0.6556819	69.4	-0.6271018	69.4	-0.6168041	69.4	-0.6166162	69.4	-0.5978644	69.4	-0.6074242	69.4	-0.6121926
69.6	-0.6898806	69.6	-0.7120614	69.6	-0.70087	69.6	-0.6973628	69.6	-0.7069267	69.6	-0.6974601	69.6	-0.6947865	69.6	-0.6687375	69.6	-0.6280237	69.6	-0.6528074	69.6	-0.6282323	69.6	-0.6146421	69.6	-0.6110451	69.6	-0.5937976	69.6	-0.6043217	69.6	-0.6055471
69.8	-0.6865119	69.8	-0.7067221	69.8	-0.699554	69.8	-0.689386	69.8	-0.7019502	69.8	-0.694241	69.8	-0.6907635	69.8	-0.6664466	69.8	-0.6195942	69.8	-0.6452042	69.8	-0.6225576	69.8	-0.6095567	69.8	-0.6053938	69.8	-0.591471	69.8	-0.5996025	69.8	-0.607356
70	-4.704725	70	-4.864637	70	-4.820135	70	-4.843019	70	-4.895829	70	-4.932936	70	-4.852539	70	-4.717999	70	-4.512537	70	-4.616236	70	-4.544799	70	-4.51219	70	-4.423903	70	-4.470541	70	-4.504287	70	-4.44352
70.2	-4.973372	70.2	-5.106163	70.2	-5.099844	70.2	-5.11624	70.2	-5.113382	70.2	-5.165573	70.2	-5.122156	70.2	-4.956053	70.2	-4.792949	70.2	-4.870972	70.2	-4.844766	70.2	-4.809217	70.2	-4.715209	70.2	-4.726796	70.2	-4.784904	70.2	-4.729139
70.4	-5.100778	70.4	-5.231293	70.4	-5.237331	70.4	-5.24366	70.4	-5.222742	70.4	-5.279723	70.4	-5.256812	70.4	-5.071346	70.4	-4.921034	70.4	-5.001706	70.4	-4.967702	70.4	-4.935575	70.4	-4.844738	70.4	-4.84402	70.4	-4.905518	70.4	-4.863223
70.6	-5.17764	70.6	-5.305598	70.6	-5.312258	70.6	-5.317572	70.6	-5.2982	70.6	-5.359957	70.6	-5.334131	70.6	-5.143252	70.6	-4.987734	70.6	-5.068171	70.6	-5.052978	70.6	-5.006981	70.6	-4.916697	70.6	-4.919105	70.6	-4.979475	70.6	-4.936013
70.8	-5.236459	70.8	-5.361062	70.8	-5.365684	70.8	-5.372434	70.8	-5.351533	70.8	-5.412939	70.8	-5.391664	70.8	-5.201986	70.8	-5.040455	70.8	-5.127369	70.8	-5.108735	70.8	-5.06514	70.8	-4.966724	70.8	-4.968496	70.8	-5.033754	70.8	-4.991191
71	-5.270594	71	-5.403967	71	-5.410811	71	-5.415886	71	-5.38933	71	-5.456338	71	-5.432039	71	-5.238129	71	-5.079597	71	-5.165819	71	-5.151351	71	-5.103786	71	-5.012324	71	-5.008432	71	-5.075804	71	-5.035616
71.2	-5.308175	71.2	-5.435745	71.2	-5.443258	71.2	-5.450651	71.2	-5.425783	71.2	-5.48805	71.2	-5.46378	71.2	-5.277198	71.2	-5.115872	71.2	-5.202452	71.2	-5.183779	71.2	-5.137303	71.2	-5.044868	71.2	-5.051119	71.2	-5.112544	71.2	-5.064273
71.4	-5.345885	71.4	-5.470482	71.4	-5.477892	71.4	-5.484879	71.4	-5.455903	71.4	-5.517144	71.4	-5.500072	71.4	-5.305083	71.4	-5.146053	71.4	-5.236222	71.4	-5.210436	71.4	-5.169071	71.4	-5.078849	71.4	-5.074271	71.4	-5.145708	71.4	-5.09517
71.6	-5.364711	71.6	-5.491477	71.6	-5.504386	71.6	-5.513391	71.6	-5.479584	71.6	-5.545149	71.6	-5.521097	71.6	-5.330748	71.6	-5.16833	71.6	-5.257291	71.6	-5.238593	71.6	-5.194281	71.6	-5.104639	71.6	-5.103833	71.6	-5.167794	71.6	-5.127851
71.8	-5.393268	71.8	-5.521009	71.8	-5.527168	71.8	-5.537905	71.8	-5.498805	71.8	-5.57204	71.8	-5.550472	71.8	-5.358387	71.8	-5.1881	71.8	-5.282431	71.8	-5.262105	71.8	-5.217362	71.8	-5.125298	71.8	-5.127621	71.8	-5.192975	71.8	-5.14389
72	-5.414233	72	-5.540097	72	-5.545383	72	-5.55619	72	-5.525117	72	-5.593554	72	-5.57539	72	-5.38337	72	-5.212224	72	-5.30308	72	-5.281105	72	-5.235073	72	-5.148777	72	-5.147636	72	-5.207988	72	-5.16225
72.2	-5.430246	72.2	-5.560246	72.2	-5.566933	72.2	-5.576947	72.2	-5.538801	72.2	-5.60841	72.2	-5.591095	72.2	-5.38562	72.2	-5.226851	72.2	-5.319106	72.2	-5.297563	72.2	-5.252464	72.2	-5.163447	72.2	-5.157289	72.2	-5.230483	72.2	-5.183063
72.4	-5.445883	72.4	-5.580029	72.4	-5.58353	72.4	-5.589159	72.4	-5.559253	72.4	-5.630054	72.4	-5.610876	72.4	-5.408088	72.4	-5.250233	72.4	-5.336557	72.4	-5.315179	72.4	-5.269114	72.4	-5.177363	72.4	-5.18072	72.4	-5.245037	72.4	-5.201108
72.6	-5.469521	72.6	-5.601109	72.6	-5.598927	72.6	-5.606053	72.6	-5.572494	72.6	-5.643813	72.6	-5.624577	72.6	-5.430591	72.6	-5.264434	72.6	-5.350379	72.6	-5.335468	72.6	-5.286598	72.6	-5.194475	72.6	-5.199442	72.6	-5.261753	72.6	-5.21663
72.8	-5.477038	72.8	-5.609705	72.8	-5.615276	72.8	-5.622196	72.8	-5.589826	72.8	-5.659761	72.8	-5.642452	72.8	-5.440946	72.8	-5.277677	72.8	-5.366372	72.8	-5.346296	72.8	-5.300132	72.8	-5.213552	72.8	-5.208892	72.8	-5.278401	72.8	-5.227901
73	-5.492266	73	-5.618399	73	-5.629988	73	-5.631141	73	-5.598587	73	-5.673442	73	-5.658917	73	-5.455316	73	-5.294723	73	-5.380006	73	-5.360331	73	-5.313279	73	-5.227522	73	-5.219796	73	-5.29319	73	-5.243285
73.2	-5.509655	73.2	-5.638785	73.2	-5.643287	73.2	-5.649097	73.2	-5.614382	73.2	-5.688154	73.2	-5.663872	73.2	-5.471341	73.2	-5.30364	73.2	-5.392041	73.2	-5.372245	73.2	-5.32833	73.2	-5.227827	73.2	-5.22834	73.2	-5.299227	73.2	-5.24783
73.4	-5.518269	73.4	-5.650787	73.4	-5.657169	73.4	-5.665352	73.4	-5.626771	73.4	-5.700199	73.4	-5.678008	73.4	-5.480927	73.4	-5.312165	73.4	-5.406724	73.4	-5.380373	73.4	-5.337599	73.4	-5.247223	73.4	-5.244508	73.4	-5.313086	73.4	-5.265375
73.6	-5.527306	73.6	-5.657066	73.6	-5.663352	73.6	-5.675618	73.6	-5.634132	73.6	-5.711596	73.6	-5.692206	73.6	-5.488051	73.6	-5.329447	73.6	-5.413888	73.6	-5.391622	73.6	-5.351081	73.6	-5.257305	73.6	-5.256685	73.6	-5.327349	73.6	-5.277045
73.8	-5.54115	73.8	-5.665248	73.8	-5.67613	73.8	-5.6821	73.8	-5.642479	73.8	-5.714992	73.8	-5.700458	73.8	-5.499234	73.8	-5.332451	73.8	-5.423251	73.8	-5.403977	73.8	-5.362936	73.8	-5.267532	73.8	-5.265943	73.8	-5.328036	73.8	-5.285144
74	-5.551501	74	-5.678843	74	-5.685999	74	-5.70121	74	-5.656666	74	-5.732751	74	-5.7124	74	-5.512993	74	-5.346208	74	-5.430733	74	-5.412854	74	-5.370193	74	-5.269398	74	-5.271999	74	-5.350075	74	-5.289029
74.2	-5.557353	74.2	-5.689701	74.2	-5.691481	74.2	-5.70139	74.2	-5.66111	74.2	-5.742021	74.2	-5.724563	74.2	-5.523418	74.2	-5.354321	74.2	-5.445769	74.2	-5.421423	74.2	-5.378093	74.2	-5.285338	74.2	-5.282581	74.2	-5.353854	74.2	-5.305948
74.4	-5.571086	74.4	-5.701594	74.4	-5.704971	74.4	-5.714325	74.4	-5.675771	74.4	-5.748233	74.4	-5.731684	74.4	-5.529221	74.4	-5.365009	74.4	-5.451748	74.4	-5.43418	74.4	-5.387937	74.4	-5.294522	74.4	-5.289271	74.4	-5.361189	74.4	-5.312407
74.6	-5.576279	74.6	-5.704649	74.6	-5.71248	74.6	-5.722784	74.6	-5.681738	74.6	-5.753529	74.6	-5.740762	74.6	-5.537081	74.6	-5.373316	74.6	-5.453312	74.6	-5.438084	74.6	-5.391181	74.6	-5.293499	74.6	-5.299248	74.6	-5.374025	74.6	-5.321698
74.8	-5.578469	74.8	-5.708035	74.8	-5.717437	74.8	-5.721423	74.8	-5.692241	74.8	-5.761899	74.8	-5.745455	74.8	-5.540997	74.8	-5.37566	74.8	-5.465843	74.8	-5.443077	74.8	-5.396896	74.8	-5.302717	74.8	-5.306021	74.8	-5.373449	74.8	-5.326249
75	-1.010871	75	-1.055593	75	-1.025728	75	-1.019953	75	-1.032075	75	-1.01608	75	-1.010631	75	-0.9793787	75	-0.9564785	75	-0.973541	75	-0.9478475	75	-0.9260123	75	-0.920759	75	-0.9010823	75	-0.903033	75	-0.9092951
75.2	-0.9739024	75.2	-1.006814	75.2	-0.9751833	75.2	-0.9765872	75.2	-0.9911897	75.2	-0.9762918	75.2	-0.9690685	75.2	-0.9470669	75.2	-0.9210968	75.2	-0.9514109	75.2	-0.9131533	75.2	-0.8854948	75.2	-0.8908561	75.2	-0.8633908	75.2	-0.8735332	75.2	-0.888204
75.4	-0.9278943	75.4	-0.9704914	75.4	-0.9357197	75.4	-0.9394267	75.4	-0.9507241	75.4	-0.9383417	75.4	-0.9235308	75.4	-0.9036899	75.4	-0.8763894	75.4	-0.9152222	75.4	-0.8709032	75.4	-0.8484364	75.4	-0.8524204	75.4	-0.8246832	75.4	-0.8276327	75.4	-0.8443176
75.6	-0.8930324	75.6	-0.9359211	75.6	-0.901656	75.6	-0.9060476	75.6	-0.9140214	75.6	-0.8972809	75.6	-0.8977417	75.6	-0.869908	75.6	-0.8417022	75.6	-0.8798389	75.6	-0.8343887	75.6	-0.8150516	75.6	-0.8245329	75.6	-0.790606	75.6	-0.7974008	75.6	-0.8114402
75.8	-0.8682954	75.8	-0.9065188	75.8	-0.8780935	75.8	-0.8754063	75.8	-0.8891916	75.8	-0.8722991	75.8	-0.8675737	75.8	-0.8420836	75.8	-0.8154287	75.8	-0.8527453	75.8	-0.8168691	75.8	-0.7880092	75.8	-0.7915483	75.8	-0.7671033	75.8	-0.7699956	75.8	-0.7897741
76	-0.8455134	76	-0.8814443	76	-0.8524657	76	-0.8559003	76	-0.8647403	76	-0.8532074	76	-0.8430821	76	-0.8228928	76	-0.7937948	76	-0.8264795	76	-0.7895022	76	-0.7650083	76	-0.7711349	76	-0.7432517	76	-0.743968	76	-0.7659095
76.2	-0.8275889	76.2	-0.8644682	76.2	-0.8371341	76.2	-0.8353097	76.2	-0.8499057	76.2	-0.8327982	76.2	-0.820863	76.2	-0.8032797	76.2	-0.7744092	76.2	-0.8071286	76.2	-0.7662714	76.2	-0.7443421	76.2	-0.7465153	76.2	-0.7258702	76.2	-0.7321835	76.2	-0.7438484
76.4	-0.8070073	76.4	-0.8483924	76.4	-0.816249	76.4	-0.8190439	76.4	-0.8307654	76.4	-0.8155057	76.4	-0.8098456	76.4	-0.7828261	76.4	-0.7589124	76.4	-0.7889715	76.4	-0.7516187	76.4	-0.723712	76.4	-0.7360332	76.4	-0.706455	76.4	-0.7171625	76.4	-0.7265313
76.6	-0.7938876	76.6	-0.833689	76.6	-0.8034683	76.6	-0.8030626	76.6	-0.8135794	76.6	-0.8005948	76.6	-0.7909597	76.6	-0.7663895	76.6	-0.7423497	76.6	-0.777099	76.6	-0.739966	76.6	-0.7146433	76.6	-0.7180384	76.6	-0.6923497	76.6	-0.696507	76.6	-0.7142288
76.8	-0.7817068	76.8	-0.8243676	76.8	-0.7826802	76.8	-0.7902273	76.8	-0.805582	76.8	-0.7898419	76.8	-0.7798939	76.8	-0.7549309	76.8	-0.7292128	76.8	-0.7620729	76.8	-0.7189416	76.8	-0.7014538	76.8	-0.7108952	76.8	-0.6849043	76.8	-0.6879134	76.8	-0.6996444
77	-0.7698432	77	-0.8103137	77	-0.7767323	77	-0.7785327	77	-0.7936239	77	-0.7731798	77	-0.7664421	77	-0.7453182	77	-0.7200608	77	-0.7509023	77	-0.7175841	77	-0.6904238	77	-0.6974747	77	-0.6714518	77	-0.6761394	77	-0.6881205
77.2	-0.7613646	77.2	-0.7972644	77.2	-0.7654847	77.2	-0.7680146	77.2	-0.7783805	77.2	-0.7623156	77.2	-0.756465	77.2	-0.7327331	77.2	-0.7074187	77.2	-0.7406845	77.2	-0.7000487	77.2	-0.6764507	77.2	-0.6813554	77.2	-0.6590764	77.2	-0.6598236	77.2	-0.6760139
77.4	-0.7494262	77.4	-0.7876608	77.4	-0.7547637	77.4	-0.7567754	77.4	-0.7704341	77.4	-0.754479	77.4	-0.7484373	77.4	-0.7225268	77.4	-0.6972612	77.4	-0.7277219	77.4	-0.69135	77.4	-0.6698323	77.4	-0.677996	77.4	-0.6507729	77.4	-0.6476494	77.4	-0.6706054
77.6	-0.7405069	77.6	-0.7829239	77.6	-0.7436883	77.6	-0.7496462	77.6	-0.7613251	77.6	-0.7434952	77.6	-0.7408228	77.6	-0.7138221	77.59	-0.6865249	77.59	-0.7208158	77.59	-0.6800721	77.59	-0.6565586	77.59	-0.6695959	77.59	-0.6425727	77.59	-0.6408187	77.59	-0.6611393
77.8	-0.7322771	77.8	-0.767534	77.8	-0.7358987	77.8	-0.740824	77.8	-0.7549602	77.8	-0.7357317	77.8	-0.7328102	77.8	-0.7098945	77.8	-0.6822173	77.8	-0.7157273	77.8	-0.6735134	77.8	-0.6530308	77.8	-0.6598157	77.8	-0.6346433	77.8	-0.638436	77.8	-0.6466523
78	-0.7246789	78	-0.7630857	78	-0.7301005	78	-0.7310684	78	-0.7498974	78	-0.7293543	78	-0.718017	78	-0.7006835	78	-0.6757372	78	-0.7012823	78	-0.667134	78	-0.6430181	78	-0.6516912	78	-0.6243328	78	-0.6280171	78	-0.6370184
78.2	-0.7186623	78.2	-0.7580684	78.2	-0.7225247	78.2	-0.7228445	78.2	-0.7395737	78.2	-0.7192039	78.2	-0.7153503	78.2	-0.6907969	78.2	-0.6703876	78.2	-0.6923062	78.2	-0.6613166	78.2	-0.6392326	78.2	-0.6431624	78.2	-0.6200375	78.2	-0.6197622	78.2	-0.6343585
78.4	-0.7108872	78.4	-0.7541357	78.4	-0.714363	78.4	-0.7139474	78.4	-0.7350359	78.4	-0.7145499	78.4	-0.7056492	78.4	-0.6853606	78.4	-0.6575334	78.4	-0.689159	78.4	-0.6532785	78.4	-0.6295567	78.4	-0.637051	78.4	-0.612248	78.4	-0.6099536	78.4	-0.6332652
78.6	-0.7000473	78.6	-0.741715	78.6	-0.7078387	78.6	-0.7082254	78.6	-0.7281767	78.6	-0.7079505	78.6	-0.7005134	78.6	-0.6781746	78.6	-0.6598046	78.6	-0.685302	78.6	-0.6460701	78.6	-0.6215726	78.6	-0.6310275	78.6	-0.6051429	78.6	-0.6057832	78.6	-0.6210304
78.8	-0.6962774	78.8	-0.7428112	78.8	-0.6953647	78.8	-0.701705	78.8	-0.7223102	78.8	-0.7003708	78.8	-0.6918652	78.8	-0.670452	78.8	-0.647898	78.8	-0.6775556	78.8	-0.6381331	78.8	-0.6154907	78.8	-0.6241717	78.8	-0.5976402	78.8	-0.6040967	78.8	-0.6151764
79	-0.6906992	79	-0.7293828	79	-0.6912404	79	-0.6975501	79	-0.7111005	79	-0.6955292	79	-0.6863103	79	-0.6648273	79	-0.6413968	79	-0.67113	79	-0.6273309	79	-0.6088961	79	-0.6167583	79	-0.5910985	79	-0.5986096	79	-0.6127094
79.2	-0.6870849	79.2	-0.7314634	79.2	-0.6902037	79.2	-0.6908185	79.2	-0.7094949	79.2	-0.6932784	79.2	-0.6842531	79.2	-0.6607894	79.2	-0.6401038	79.2	-0.6718347	79.2	-0.6265951	79.2	-0.6049817	79.2	-0.6157674	79.2	-0.5857357	79.2	-0.5865379	79.2	-0.6037548
79.4	-0.6800702	79.4	-0.7198123	79.4	-0.682935	79.4	-0.6863077	79.4	-0.701781	79.4	-0.6866139	79.4	-0.6784154	79.4	-0.6548055	79.4	-0.6329223	79.4	-0.6584952	79.4	-0.6218718	79.4	-0.5996538	79.4	-0.6109124	79.4	-0.58314	79.4	-0.5871606	79.4	-0.6062868
79.6	-0.6789306	79.6	-0.7157049	79.6	-0.6838719	79.6	-0.6843899	79.6	-0.7008566	79.6	-0.6809883	79.6	-0.6739205	79.6	-0.6516219	79.6	-0.6256099	79.6	-0.6555501	79.6	-0.6185381	79.6	-0.5970806	79.6	-0.6086121	79.6	-0.577916	79.6	-0.5813794	79.6	-0.6020777
79.8	-0.6765379	79.8	-0.7150435	79.8	-0.6779862	79.8	-0.6795089	79.8	-0.6931618	79.8	-0.6775222	79.8	-0.6707899	79.8	-0.6463099	79.8	-0.6284725	79.8	-0.6546026	79.8	-0.6157171	79.8	-0.5927184	79.8	-0.604794	79.8	-0.5757582	79.8	-0.5790011	79.8	-0.5942575
80	-4.736589	80	-4.828608	80	-4.860476	80	-4.855034	80	-4.79593	80	-4.89119	80	-4.84087	80	-4.643126	80	-4.604643	80	-4.685388	80	-4.604036	80	-4.576575	80	-4.507751	80	-4.515102	80	-4.561697	80	-4.528552
80.2	-4.993245	80.2	-5.129562	80.2	-5.116895	80.2	-5.130687	80.2	-5.069825	80.2	-5.163797	80.2	-5.120366	80.2	-4.922642	80.19	-4.841177	80.19	-4.926641	80.19	-4.872234	80.19	-4.827489	80.19	-4.758065	80.19	-4.749317	80.19	-4.807166	80.19	-4.774078
80.4	-5.112891	80.4	-5.244938	80.4	-5.237481	80.4	-5.251677	80.4	-5.205266	80.4	-5.276498	80.4	-5.250288	80.4	-5.058667	80.4	-4.947147	80.4	-5.03557	80.4	-4.992112	80.4	-4.937312	80.4	-4.870957	80.4	-4.855279	80.4	-4.920331	80.4	-4.886423
80.6	-5.190746	80.6	-5.320434	80.6	-5.312532	80.6	-5.321173	80.6	-5.286444	80.6	-5.347745	80.6	-5.31729	80.6	-5.137687	80.6	-5.014081	80.6	-5.099315	80.6	-5.060912	80.6	-5.012335	80.6	-4.931893	80.6	-4.921174	80.6	-4.980692	80.6	-4.944661
80.8	-5.240163	80.8	-5.373463	80.8	-5.356363	80.8	-5.370651	80.8	-5.336042	80.8	-5.399744	80.8	-5.376979	80.8	-5.182536	80.8	-5.056325	80.8	-5.143976	80.8	-5.109585	80.8	-5.061123	80.8	-4.980085	80.8	-4.969696	80.8	-5.029128	80.8	-4.995543
81	-5.276012	81	-5.41254	81	-5.401137	81	-5.413012	81	-5.378603	81	-5.435408	81	-5.417723	81	-5.220309	81	-5.09476	81	-5.185396	81	-5.147698	81	-5.091198	81	-5.016973	81	-5.003674	81	-5.070495	81	-5.033899
81.2	-5.31063	81.2	-5.449309	81.2	-5.428735	81.2	-5.442506	81.2	-5.406492	81.2	-5.472078	81.2	-5.450204	81.2	-5.260972	81.2	-5.127373	81.2	-5.217465	81.2	-5.179006	81.2	-5.123837	81.2	-5.047031	81.2	-5.040894	81.2	-5.098132	81.2	-5.060357
81.4	-5.339854	81.4	-5.471739	81.4	-5.457228	81.4	-5.473485	81.4	-5.441069	81.4	-5.498477	81.4	-5.477762	81.4	-5.284776	81.4	-5.150552	81.4	-5.240537	81.4	-5.206924	81.4	-5.153105	81.4	-5.073358	81.4	-5.066624	81.4	-5.124027	81.4	-5.084197
81.6	-5.35811	81.6	-5.499038	81.6	-5.479335	81.6	-5.494475	81.6	-5.461617	81.6	-5.52131	81.6	-5.502375	81.6	-5.310503	81.6	-5.176634	81.6	-5.266417	81.6	-5.233145	81.6	-5.178069	81.6	-5.095077	81.6	-5.085876	81.6	-5.150051	81.6	-5.11796
81.8	-5.38464	81.8	-5.519527	81.8	-5.498434	81.8	-5.517801	81.8	-5.482128	81.8	-5.543754	81.8	-5.521793	81.8	-5.337041	81.8	-5.193399	81.8	-5.289426	81.8	-5.250159	81.8	-5.199759	81.8	-5.121073	81.8	-5.103443	81.8	-5.17087	81.8	-5.133488
82	-5.397393	82	-5.534143	82	-5.516695	82	-5.542783	82	-5.506791	82	-5.567435	82	-5.540248	82	-5.346045	82	-5.212804	82	-5.30391	82	-5.26708	82	-5.214484	82	-5.1305	82	-5.12201	82	-5.186892	82	-5.149054
82.2	-5.416593	82.2	-5.554498	82.2	-5.538487	82.2	-5.550797	82.2	-5.521731	82.2	-5.576756	82.2	-5.5597	82.2	-5.364921	82.19	-5.227867	82.19	-5.316309	82.19	-5.287951	82.19	-5.229384	82.19	-5.154247	82.19	-5.137428	82.19	-5.203228	82.19	-5.166222
82.4	-5.432331	82.4	-5.570623	82.4	-5.551759	82.4	-5.568605	82.4	-5.534487	82.4	-5.594329	82.4	-5.576327	82.4	-5.381488	82.4	-5.243213	82.4	-5.33143	82.4	-5.301351	82.4	-5.249284	82.4	-5.168161	82.4	-5.151357	82.4	-5.216516	82.4	-5.185173
82.6	-5.448205	82.6	-5.585441	82.6	-5.561013	82.6	-5.585361	82.6	-5.548198	82.6	-5.610791	82.6	-5.589644	82.6	-5.398035	82.6	-5.25858	82.6	-5.343659	82.6	-5.31387	82.6	-5.261096	82.6	-5.17473	82.6	-5.162326	82.6	-5.234656	82.6	-5.196572
82.8	-5.4538	82.8	-5.598464	82.8	-5.576754	82.8	-5.593509	82.8	-5.562036	82.8	-5.621521	82.8	-5.603926	82.8	-5.407791	82.8	-5.269746	82.8	-5.355653	82.8	-5.321865	82.8	-5.272266	82.8	-5.184415	82.8	-5.179845	82.8	-5.242428	82.8	-5.202888
83	-5.470648	83	-5.611799	83	-5.59126	83	-5.607181	83	-5.578006	83	-5.634284	83	-5.610692	83	-5.424092	83	-5.279913	83	-5.371757	83	-5.333687	83	-5.286122	83	-5.200909	83	-5.187894	83	-5.256421	83	-5.217946
83.2	-5.482774	83.2	-5.620997	83.2	-5.59746	83.2	-5.618662	83.2	-5.581605	83.2	-5.648338	83.2	-5.627223	83.2	-5.43461	83.19	-5.291172	83.19	-5.376574	83.19	-5.342527	83.19	-5.295353	83.19	-5.210594	83.19	-5.202735	83.19	-5.264957	83.19	-5.229034
83.4	-5.492766	83.4	-5.631537	83.4	-5.609313	83.4	-5.631394	83.4	-5.594688	83.4	-5.654751	83.4	-5.636576	83.4	-5.441756	83.4	-5.303518	83.4	-5.391403	83.4	-5.355882	83.4	-5.299094	83.4	-5.21705	83.4	-5.208622	83.4	-5.276488	83.4	-5.239583
83.6	-5.498861	83.6	-5.639115	83.6	-5.622549	83.6	-5.636096	83.6	-5.602103	83.6	-5.666632	83.6	-5.646655	83.6	-5.45082	83.6	-5.305449	83.6	-5.404297	83.6	-5.364668	83.6	-5.311858	83.6	-5.227555	83.6	-5.215421	83.6	-5.288891	83.6	-5.249894
83.8	-5.510315	83.8	-5.650641	83.8	-5.629405	83.8	-5.648807	83.8	-5.615661	83.8	-5.674862	83.8	-5.654561	83.8	-5.464732	83.8	-5.317005	83.8	-5.407234	83.8	-5.37495	83.8	-5.32447	83.8	-5.235172	83.8	-5.224519	83.8	-5.290248	83.8	-5.248014
84	-5.517498	84	-5.657973	84	-5.640143	84	-5.656887	84	-5.623595	84	-5.683416	84	-5.670022	84	-5.467488	84	-5.322998	84	-5.411559	84	-5.382011	84	-5.325778	84	-5.245459	84	-5.232096	84	-5.303227	84	-5.261912
84.2	-5.528582	84.2	-5.666418	84.2	-5.643375	84.2	-5.660274	84.2	-5.631122	84.2	-5.694822	84.2	-5.676935	84.2	-5.480893	84.19	-5.334899	84.19	-5.427774	84.19	-5.385015	84.19	-5.337232	84.19	-5.250502	84.19	-5.244029	84.19	-5.311271	84.19	-5.27116
84.4	-5.540782	84.4	-5.676562	84.4	-5.658462	84.4	-5.67349	84.4	-5.639935	84.4	-5.697233	84.4	-5.683681	84.4	-5.489191	84.4	-5.339485	84.4	-5.434963	84.4	-5.396986	84.4	-5.345014	84.4	-5.259849	84.4	-5.247415	84.4	-5.318724	84.4	-5.281664
84.6	-5.543731	84.6	-5.682816	84.6	-5.662354	84.6	-5.67657	84.6	-5.645242	84.6	-5.706957	84.6	-5.688988	84.6	-5.491663	84.6	-5.347558	84.6	-5.43492	84.6	-5.399892	84.6	-5.345461	84.6	-5.265737	84.6	-5.256253	84.6	-5.321352	84.6	-5.284606
84.8	-5.551011	84.8	-5.686367	84.8	-5.665816	84.8	-5.683416	84.8	-5.652329	84.8	-5.711007	84.8	-5.693544	84.8	-5.499792	84.8	-5.348834	84.8	-5.441873	84.8	-5.404046	84.8	-5.354436	84.8	-5.271324	84.8	-5.257221	84.8	-5.329376	84.8	-5.293402
85	-0.9533764	85	-0.9969169	85	-0.9419258	85	-0.9502528	85	-0.9709737	85	-0.9355581	85	-0.9267971	85	-0.9062832	85	-0.9089922	85	-0.9296759	85	-0.8906059	85	-0.8573789	85	-0.8649626	85	-0.8396147	85	-0.8354837	85	-0.8479247
85.2	-0.9132451	85.2	-0.9537471	85.2	-0.901253	85.2	-0.9086393	85.2	-0.9296268	85.2	-0.8934458	85.2	-0.886291	85.2	-0.8693107	85.2	-0.8745999	85.2	-0.9038942	85.2	-0.8639287	85.2	-0.8175007	85.2	-0.837314	85.2	-0.8075562	85.2	-0.800348	85.2	-0.8321075
85.4	-0.868373	85.4	-0.9190369	85.4	-0.8563215	85.4	-0.8717397	85.4	-0.8901987	85.4	-0.8558676	85.4	-0.8461683	85.4	-0.832693	85.4	-0.8419452	85.4	-0.863237	85.4	-0.8222489	85.4	-0.7799629	85.4	-0.8010621	85.4	-0.7634864	85.4	-0.765035	85.4	-0.7901384
85.6	-0.8363029	85.6	-0.8809713	85.6	-0.8275604	85.6	-0.8375437	85.6	-0.8627098	85.6	-0.8250665	85.6	-0.8166956	85.6	-0.7990381	85.6	-0.8017953	85.6	-0.833091	85.6	-0.7885386	85.6	-0.7487261	85.6	-0.7714275	85.6	-0.736785	85.6	-0.7311422	85.6	-0.7634636
85.8	-0.8088594	85.8	-0.8637512	85.8	-0.8021888	85.8	-0.8145582	85.8	-0.8351434	85.8	-0.8029078	85.8	-0.7955054	85.8	-0.7749773	85.8	-0.7750532	85.8	-0.8075553	85.8	-0.7641146	85.8	-0.7274187	85.8	-0.7391953	85.8	-0.7112644	85.8	-0.7016421	85.8	-0.7270691
86	-0.7885441	86	-0.8411893	86	-0.7791314	86	-0.7953323	86	-0.8092701	86	-0.7759781	86	-0.7661125	86	-0.754205	86	-0.7542451	86	-0.779788	86	-0.7444062	86	-0.7035223	86	-0.7187842	86	-0.6825612	86	-0.68498	86	-0.7136631
86.2	-0.7661151	86.2	-0.8210538	86.2	-0.7575204	86.2	-0.7758214	86.2	-0.794687	86.2	-0.7611616	86.2	-0.7490806	86.2	-0.7310184	86.2	-0.735119	86.2	-0.760644	86.2	-0.7232871	86.2	-0.6875093	86.2	-0.6946909	86.2	-0.6648195	86.2	-0.6647155	86.2	-0.691744
86.4	-0.7554877	86.4	-0.8027436	86.4	-0.7440171	86.4	-0.761773	86.4	-0.7759209	86.4	-0.7435085	86.4	-0.7332154	86.4	-0.7168495	86.4	-0.7143858	86.4	-0.7503272	86.4	-0.7032043	86.4	-0.6672685	86.4	-0.6857507	86.4	-0.6522524	86.4	-0.6448464	86.4	-0.675735
86.6	-0.739213	86.6	-0.7894246	86.6	-0.7285728	86.6	-0.7401943	86.6	-0.7622077	86.6	-0.7291442	86.6	-0.7176732	86.6	-0.7058704	86.6	-0.7042518	86.6	-0.7340358	86.6	-0.6890048	86.6	-0.6579439	86.6	-0.6746778	86.6	-0.6342766	86.6	-0.6324423	86.6	-0.6568299
86.8	-0.7268953	86.8	-0.7786729	86.8	-0.7207944	86.8	-0.7302754	86.8	-0.7495177	86.8	-0.7120411	86.8	-0.7065259	86.8	-0.6916458	86.8	-0.6893931	86.8	-0.7188433	86.8	-0.6766353	86.8	-0.6401195	86.8	-0.6616049	86.8	-0.6228098	86.8	-0.6210329	86.8	-0.6430714
87	-0.7122859	87	-0.7649618	87	-0.707556	87	-0.717438	87	-0.7361751	87	-0.7054697	87	-0.6955981	87	-0.6828781	87	-0.6804078	87	-0.7076364	87	-0.6600477	87	-0.626303	87	-0.6504627	87	-0.6114377	87	-0.6073526	87	-0.6379963
87.2	-0.7005553	87.2	-0.7543286	87.2	-0.696435	87.2	-0.7057092	87.2	-0.7296621	87.2	-0.6935706	87.2	-0.6838656	87.2	-0.6705204	87.2	-0.6658385	87.2	-0.701226	87.2	-0.6543976	87.2	-0.6211197	87.2	-0.6363529	87.2	-0.6001095	87.2	-0.5966069	87.2	-0.6199274
87.4	-0.6939739	87.4	-0.7472382	87.4	-0.685007	87.4	-0.6971003	87.4	-0.7152846	87.4	-0.6842052	87.4	-0.6762428	87.4	-0.6649264	87.4	-0.6565677	87.4	-0.6910627	87.4	-0.6456751	87.4	-0.609892	87.4	-0.6289821	87.4	-0.5896301	87.4	-0.5909256	87.4	-0.6111484
87.6	-0.6902041	87.6	-0.7389647	87.6	-0.6792074	87.6	-0.685035	87.6	-0.7094083	87.6	-0.67821	87.6	-0.6660058	87.6	-0.6533252	87.6	-0.6502459	87.6	-0.6802196	87.6	-0.6379575	87.6	-0.5996783	87.6	-0.6182733	87.6	-0.5823359	87.6	-0.5789509	87.6	-0.6068701
87.8	-0.6757169	87.8	-0.7324075	87.8	-0.6686922	87.8	-0.6834471	87.8	-0.7021251	87.8	-0.6652908	87.8	-0.6611242	87.8	-0.6459513	87.8	-0.6406577	87.8	-0.6732559	87.8	-0.6319238	87.8	-0.5945603	87.8	-0.6153653	87.8	-0.5755849	87.8	-0.5725619	87.8	-0.5993421
88	-0.6782683	88	-0.7251602	88	-0.6616278	88	-0.6747263	88	-0.6927924	88	-0.6574616	88	-0.6571537	88	-0.6352432	88	-0.6362228	88	-0.6637697	88	-0.6195834	88	-0.5888155	88	-0.6028241	88	-0.5682405	88	-0.5660583	88	-0.5907511
88.2	-0.6640521	88.2	-0.7134705	88.2	-0.6579145	88.2	-0.6647187	88.2	-0.6842141	88.2	-0.6514747	88.2	-0.6466632	88.2	-0.6268809	88.2	-0.6277833	88.2	-0.656987	88.2	-0.6173082	88.2	-0.5785088	88.2	-0.5966797	88.2	-0.5624893	88.2	-0.5567997	88.2	-0.5790769
88.4	-0.6596263	88.4	-0.7116067	88.4	-0.6489384	88.4	-0.6575552	88.4	-0.6802973	88.4	-0.6444842	88.4	-0.6361212	88.4	-0.6194825	88.4	-0.6218256	88.4	-0.6507289	88.4	-0.607006	88.4	-0.5681606	88.4	-0.5901952	88.4	-0.5524248	88.4	-0.5514159	88.4	-0.5742208
88.6	-0.6494065	88.6	-0.6989814	88.6	-0.6425136	88.6	-0.649299	88.6	-0.6775345	88.6	-0.6432409	88.6	-0.6283924	88.6	-0.6182321	88.6	-0.6119234	88.6	-0.646133	88.6	-0.6009327	88.6	-0.5658482	88.6	-0.5843144	88.6	-0.5442395	88.6	-0.5434224	88.6	-0.5684956
88.8	-0.6427824	88.8	-0.6943505	88.8	-0.6338953	88.8	-0.6467327	88.8	-0.6657705	88.8	-0.6351783	88.8	-0.6219146	88.8	-0.6120676	88.8	-0.6090352	88.8	-0.636557	88.8	-0.5983328	88.8	-0.5617696	88.8	-0.5825487	88.8	-0.5394913	88.8	-0.5398051	88.8	-0.5598374
89	-0.6396686	89	-0.6945289	89	-0.6280937	89	-0.6416918	89	-0.6621595	89	-0.6294603	89	-0.6245054	89	-0.6064722	89	-0.5994866	89	-0.633432	89	-0.5839528	89	-0.552471	89	-0.5738825	89	-0.5381408	89	-0.5353196	89	-0.5591804
89.2	-0.6359946	89.2	-0.6879411	89.2	-0.622483	89.2	-0.6362884	89.2	-0.6539539	89.2	-0.6219788	89.2	-0.617049	89.2	-0.5986192	89.2	-0.6000627	89.2	-0.6262501	89.2	-0.582314	89.2	-0.5492327	89.2	-0.568611	89.2	-0.5296014	89.2	-0.5288687	89.2	-0.5552524
89.4	-0.6304413	89.4	-0.683171	89.4	-0.620312	89.4	-0.629913	89.4	-0.6534455	89.4	-0.6166921	89.4	-0.6123961	89.4	-0.5928574	89.4	-0.5984426	89.4	-0.6232643	89.4	-0.5799568	89.4	-0.54392	89.4	-0.5639164	89.4	-0.5261933	89.4	-0.523533	89.4	-0.5491917
89.6	-0.6265933	89.6	-0.6827559	89.6	-0.6162417	89.6	-0.6255102	89.6	-0.6513345	89.6	-0.6152063	89.6	-0.6058311	89.6	-0.5931336	89.6	-0.58954	89.6	-0.6243979	89.6	-0.5761872	89.6	-0.5407696	89.6	-0.5543432	89.6	-0.5197595	89.6	-0.5179561	89.6	-0.5487772
89.8	-0.6211856	89.8	-0.6765422	89.8	-0.6145487	89.8	-0.6250519	89.8	-0.6448225	89.8	-0.6101692	89.8	-0.6009581	89.8	-0.5886272	89.8	-0.5886309	89.8	-0.617652	89.8	-0.571547	89.8	-0.5364605	89.8	-0.5583264	89.8	-0.520101	89.8	-0.5173522	89.8	-0.539313
90	-0.5449938	90	-0.5939047	90	-0.5314031	90	-0.5445828	90	-0.568371	90	-0.5309583	90	-0.5302775	90	-0.517053	90	-0.5247346	90	-0.5523664	90	-0.508102	90	-0.477432	90	-0.4931725	90	-0.4569924	90	-0.463399	90	-0.4829772
90.2	-0.5427165	90.2	-0.5820647	90.2	-0.5294998	90.2	-0.5407324	90.2	-0.5628288	90.2	-0.5289522	90.2	-0.5274014	90.2	-0.5081927	90.2	-0.5214199	90.2	-0.5518355	90.2	-0.5059279	90.2	-0.47454	90.2	-0.4957005	90.2	-0.4579559	90.2	-0.4597642	90.2	-0.4836818
90.41	-0.5340562	90.41	-0.586075	90.41	-0.5217229	90.41	-0.5404169	90.41	-0.5630838	90.41	-0.5275612	90.41	-0.5264509	90.41	-0.5076489	90.4	-0.5211119	90.4	-0.5477638	90.4	-0.5019547	90.4	-0.4702692	90.4	-0.4940716	90.4	-0.46316	90.4	-0.4582212	90.4	-0.4793655
90.6	-0.5373123	90.6	-0.5863718	90.6	-0.5231249	90.6	-0.535113	90.6	-0.5622014	90.6	-0.5235518	90.6	-0.5190454	90.6	-0.5070117	90.6	-0.5211682	90.6	-0.5474628	90.6	-0.5022992	90.6	-0.4726829	90.6	-0.4914978	90.6	-0.4543069	90.6	-0.4519002	90.6	-0.4765666
90.8	-0.5371862	90.8	-0.5821759	90.8	-0.5166315	90.8	-0.5327248	90.8	-0.5603682	90.8	-0.5238044	90.8	-0.5193778	90.8	-0.5017596	90.8	-0.5146846	90.8	-0.5448422	90.8	-0.5002667	90.8	-0.4703614	90.8	-0.4878476	90.8	-0.4538815	90.8	-0.4529247	90.8	-0.4793156
91	-0.5363562	91	-0.5777837	91	-0.5135517	91	-0.532627	91	-0.5551997	91	-0.5202165	91	-0.5156654	91	-0.5013438	91	-0.5154895	91	-0.5423	91	-0.4963253	91	-0.468845	91	-0.4858502	91	-0.4523656	91	-0.4520453	91	-0.4698009
91.2	-0.5282444	91.2	-0.5778296	91.2	-0.5143232	91.2	-0.5283364	91.2	-0.554065	91.2	-0.5207466	91.2	-0.5182073	91.2	-0.5031145	91.2	-0.5122069	91.2	-0.539777	91.2	-0.4951495	91.2	-0.4654942	91.2	-0.4875258	91.2	-0.445986	91.2	-0.4478291	91.2	-0.4714646
91.4	-0.5268714	91.4	-0.578801	91.4	-0.5169716	91.4	-0.5303887	91.4	-0.5489714	91.4	-0.5162206	91.4	-0.5099083	91.4	-0.4949234	91.4	-0.5114653	91.4	-0.5342118	91.4	-0.4902205	91.4	-0.4657205	91.4	-0.4819651	91.4	-0.4450639	91.4	-0.4437813	91.4	-0.4715648
91.6	-0.5234341	91.6	-0.5707942	91.6	-0.511893	91.6	-0.5221291	91.6	-0.5525675	91.6	-0.5140523	91.6	-0.5074291	91.6	-0.4920491	91.6	-0.5073248	91.6	-0.5394909	91.6	-0.4918111	91.6	-0.4613353	91.6	-0.4810707	91.6	-0.4487419	91.6	-0.4428723	91.6	-0.4678121
91.8	-0.5272928	91.8	-0.5743366	91.8	-0.504694	91.8	-0.5236298	91.8	-0.5493505	91.8	-0.5076031	91.8	-0.5082419	91.8	-0.4955159	91.8	-0.5092489	91.8	-0.5348066	91.8	-0.486827	91.8	-0.4619275	91.8	-0.4768713	91.8	-0.4461847	91.8	-0.4393763	91.8	-0.4658157
92	-0.525341	92	-0.5674258	92	-0.5034524	92	-0.5204731	92	-0.5443149	92	-0.5094156	92	-0.5051867	92	-0.4932633	92	-0.5035622	92	-0.5318491	92	-0.4895967	92	-0.4570937	92	-0.4741898	92	-0.4401211	92	-0.4418902	92	-0.4636951
92.2	-0.5206218	92.2	-0.5661075	92.2	-0.5031494	92.2	-0.5162632	92.2	-0.5429597	92.2	-0.5091586	92.2	-0.5024515	92.2	-0.4910531	92.2	-0.5018461	92.2	-0.5332562	92.2	-0.4898805	92.2	-0.459577	92.2	-0.4762031	92.2	-0.4394014	92.2	-0.4419673	92.2	-0.4618788
92.4	-0.5203063	92.4	-0.5673872	92.4	-0.5033849	92.4	-0.5204232	92.4	-0.5433209	92.4	-0.5053231	92.4	-0.501546	92.4	-0.4877608	92.4	-0.4987222	92.4	-0.5329593	92.4	-0.482651	92.4	-0.4576796	92.4	-0.4730472	92.4	-0.4380468	92.4	-0.4306077	92.4	-0.464325
92.6	-0.5180783	92.6	-0.5653235	92.6	-0.4990106	92.6	-0.5143749	92.6	-0.5386487	92.6	-0.5047267	92.6	-0.50135	92.6	-0.485489	92.6	-0.5001256	92.6	-0.5291116	92.6	-0.4819727	92.6	-0.4512669	92.6	-0.4738843	92.6	-0.4346316	92.6	-0.4403863	92.6	-0.4610544
92.8	-0.5155898	92.8	-0.5628871	92.8	-0.4982858	92.8	-0.5150557	92.8	-0.5378756	92.8	-0.5000365	92.8	-0.4994484	92.8	-0.4837887	92.8	-0.4997033	92.8	-0.5266459	92.8	-0.4847395	92.8	-0.451474	92.8	-0.4694173	92.8	-0.4364496	92.8	-0.4376571	92.8	-0.4582259
93	-0.5140599	93	-0.5660359	93	-0.4973314	93	-0.5124506	93	-0.5348361	93	-0.5018337	93	-0.5021519	93	-0.4830034	93	-0.4914368	93	-0.5253773	93	-0.4773593	93	-0.4523188	93	-0.4720217	93	-0.4302514	93	-0.4355769	93	-0.4587167
93.2	-0.5128301	93.2	-0.5587527	93.2	-0.495782	93.2	-0.5090407	93.2	-0.5348996	93.2	-0.5011485	93.2	-0.494128	93.2	-0.4807681	93.2	-0.4956523	93.2	-0.5202302	93.2	-0.4804107	93.2	-0.4499068	93.2	-0.47023	93.2	-0.430344	93.2	-0.4358587	93.2	-0.4550175
93.4	-0.5117812	93.4	-0.5612493	93.4	-0.496054	93.4	-0.5127075	93.4	-0.5309076	93.4	-0.5006127	93.4	-0.4892878	93.4	-0.4771945	93.4	-0.4955131	93.4	-0.5225517	93.4	-0.4749047	93.4	-0.4491776	93.4	-0.4653312	93.4	-0.4335009	93.4	-0.42677	93.4	-0.4468353
93.6	-0.5069106	93.6	-0.5552964	93.6	-0.4910347	93.6	-0.5097927	93.6	-0.534595	93.6	-0.4972637	93.6	-0.4967805	93.6	-0.4771202	93.6	-0.4926164	93.6	-0.5220873	93.6	-0.4726885	93.6	-0.446394	93.6	-0.463553	93.6	-0.4274754	93.6	-0.434457	93.6	-0.4479747
93.8	-0.5074394	93.8	-0.5537254	93.8	-0.4915053	93.8	-0.5071369	93.8	-0.5355544	93.8	-0.4899087	93.8	-0.4882605	93.8	-0.4755971	93.8	-0.485337	93.8	-0.516764	93.8	-0.4678769	93.8	-0.4459077	93.8	-0.4643256	93.8	-0.4324052	93.8	-0.4299496	93.8	-0.4530002
94	-0.5075788	94	-0.5516136	94	-0.4905721	94	-0.5027864	94	-0.5279279	94	-0.4960457	94	-0.4875188	94	-0.4728275	94	-0.4836239	94	-0.5164595	94	-0.4714153	94	-0.440705	94	-0.4630255	94	-0.42251	94	-0.4251912	94	-0.4495445
94.2	-0.5054172	94.2	-0.5573034	94.2	-0.487463	94.2	-0.5066012	94.2	-0.5276616	94.2	-0.4880459	94.2	-0.4884094	94.2	-0.4726956	94.2	-0.4863852	94.2	-0.5181732	94.2	-0.4729669	94.2	-0.4408735	94.2	-0.4617161	94.2	-0.425599	94.2	-0.4250366	94.2	-0.4466784
94.4	-0.4999616	94.4	-0.5511487	94.4	-0.4879975	94.4	-0.5014225	94.4	-0.5269802	94.4	-0.4921098	94.4	-0.4841791	94.4	-0.4730068	94.4	-0.4877144	94.4	-0.514819	94.4	-0.4726397	94.4	-0.4435586	94.4	-0.4579593	94.4	-0.4248782	94.4	-0.4231113	94.4	-0.445744
94.6	-0.4991419	94.6	-0.5516338	94.6	-0.4833271	94.6	-0.4976802	94.6	-0.5204045	94.6	-0.4939287	94.6	-0.4845843	94.6	-0.4723381	94.6	-0.4798084	94.6	-0.5128205	94.6	-0.4715881	94.6	-0.4405841	94.6	-0.4599132	94.6	-0.4199724	94.6	-0.423982	94.6	-0.4435789
94.8	-0.5013191	94.8	-0.5478097	94.8	-0.48509	94.8	-0.4990413	94.8	-0.5216675	94.8	-0.4907534	94.8	-0.483735	94.8	-0.4692633	94.8	-0.4824494	94.8	-0.5131687	94.8	-0.4700784	94.8	-0.4368676	94.8	-0.4577044	94.8	-0.4163658	94.8	-0.4202699	94.8	-0.4494855
95	-0.4982749	95	-0.5437779	95	-0.4805363	95	-0.4955337	95	-0.5216078	95	-0.4876325	95	-0.4808016	95	-0.4675019	95	-0.485032	95	-0.5122667	95	-0.4681953	95	-0.4380014	95	-0.4535665	95	-0.4157413	95	-0.4177355	95	-0.4388138
95.2	-0.4976175	95.2	-0.5464566	95.2	-0.480059	95.2	-0.4974022	95.2	-0.5183442	95.2	-0.4820298	95.2	-0.477284	95.2	-0.4639706	95.2	-0.4814002	95.2	-0.5099387	95.2	-0.4655536	95.2	-0.4343315	95.2	-0.4555037	95.2	-0.4186732	95.2	-0.4159417	95.2	-0.4408611
95.4	-0.4949523	95.4	-0.5412191	95.4	-0.4805731	95.4	-0.496828	95.4	-0.51942	95.4	-0.4828996	95.4	-0.4747173	95.4	-0.4595481	95.4	-0.4812313	95.4	-0.5128518	95.4	-0.458853	95.4	-0.4334412	95.4	-0.4541006	95.4	-0.4157382	95.4	-0.4145804	95.4	-0.4412356
95.6	-0.4912682	95.6	-0.53894	95.6	-0.4827881	95.6	-0.4960838	95.6	-0.5191994	95.6	-0.4798105	95.6	-0.4726353	95.6	-0.4605857	95.6	-0.478635	95.6	-0.5101907	95.6	-0.4617809	95.6	-0.4346088	95.6	-0.4521931	95.6	-0.417277	95.6	-0.4105421	95.6	-0.4430622
95.8	-0.4901628	95.8	-0.5432089	95.8	-0.4752939	95.8	-0.4950476	95.8	-0.5142876	95.8	-0.4797446	95.8	-0.4741661	95.8	-0.4554469	95.8	-0.4749948	95.8	-0.5067876	95.8	-0.4586049	95.8	-0.4313008	95.8	-0.4474929	95.8	-0.4121179	95.8	-0.4117965	95.8	-0.4437837
96	-0.4938022	96	-0.5379056	96	-0.475433	96	-0.4911091	96	-0.5125437	96	-0.4801666	96	-0.4762106	96	-0.4580501	96	-0.4742491	96	-0.5024753	96	-0.4577421	96	-0.4293992	96	-0.4493643	96	-0.414644	96	-0.4108548	96	-0.4368836
96.2	-0.4940722	96.2	-0.5363793	96.2	-0.473003	96.2	-0.4910622	96.2	-0.5111433	96.2	-0.477731	96.2	-0.4747323	96.2	-0.4564278	96.2	-0.4786962	96.2	-0.4996936	96.2	-0.4570154	96.2	-0.4248685	96.2	-0.4539483	96.2	-0.4129417	96.2	-0.410238	96.2	-0.4374989
96.4	-0.4910534	96.4	-0.5321811	96.4	-0.4709283	96.4	-0.4841672	96.4	-0.5160715	96.4	-0.4723694	96.4	-0.4716783	96.4	-0.4572921	96.4	-0.4739484	96.4	-0.5035406	96.4	-0.4577836	96.4	-0.4260062	96.4	-0.4457838	96.4	-0.407845	96.4	-0.4084842	96.4	-0.4352708
96.6	-0.4899172	96.6	-0.5355973	96.6	-0.4713356	96.6	-0.486957	96.6	-0.5135881	96.6	-0.4745156	96.6	-0.4669549	96.6	-0.4577721	96.6	-0.4718634	96.6	-0.500505	96.6	-0.4530263	96.6	-0.4290251	96.6	-0.4475473	96.6	-0.4071419	96.6	-0.4094839	96.6	-0.4300238
96.8	-0.4882205	96.8	-0.5379521	96.8	-0.4702607	96.8	-0.4875289	96.8	-0.5103049	96.8	-0.4744427	96.8	-0.466211	96.8	-0.4523075	96.8	-0.4695655	96.8	-0.496301	96.8	-0.4551822	96.8	-0.4223919	96.8	-0.4434128	96.8	-0.4084377	96.8	-0.4085238	96.8	-0.4312316
97	-0.4864864	97	-0.5314709	97	-0.4721019	97	-0.4830267	97	-0.5103711	97	-0.4725584	97	-0.4625143	97	-0.4511431	97	-0.4706612	97	-0.4964324	97	-0.4530415	97	-0.4174663	97	-0.4492684	97	-0.4051037	97	-0.4071524	97	-0.4295567
97.2	-0.4873596	97.2	-0.5328311	97.2	-0.4658446	97.2	-0.4809615	97.2	-0.5059411	97.2	-0.4710047	97.2	-0.4664787	97.2	-0.4525687	97.2	-0.4651178	97.2	-0.497829	97.2	-0.4537904	97.2	-0.4161181	97.2	-0.4395522	97.2	-0.4047335	97.2	-0.4040839	97.2	-0.4280563
97.4	-0.4824926	97.4	-0.530009	97.4	-0.4656806	97.4	-0.4864531	97.4	-0.5040335	97.4	-0.4726638	97.4	-0.4666895	97.4	-0.4509912	97.4	-0.4680825	97.4	-0.4965744	97.4	-0.4493115	97.4	-0.4197045	97.4	-0.4443663	97.4	-0.4035329	97.4	-0.3972844	97.4	-0.4315289
97.6	-0.4865937	97.6	-0.5287734	97.6	-0.4634916	97.6	-0.4833775	97.6	-0.5061194	97.6	-0.470221	97.6	-0.4616934	97.6	-0.4510817	97.6	-0.4655756	97.6	-0.4930326	97.6	-0.4502707	97.6	-0.4179343	97.6	-0.4384135	97.6	-0.4040377	97.6	-0.4007477	97.6	-0.4258324
97.8	-0.4832944	97.8	-0.5320992	97.8	-0.4655208	97.8	-0.4797553	97.8	-0.5046512	97.8	-0.4673645	97.8	-0.4607512	97.8	-0.450039	97.8	-0.4686228	97.8	-0.4966605	97.8	-0.446546	97.8	-0.4183962	97.8	-0.4369714	97.8	-0.3977033	97.8	-0.4028292	97.8	-0.4242806
98	-0.4803039	98	-0.5293704	98	-0.4624575	98	-0.4787352	98	-0.5041382	98	-0.464532	98	-0.4566651	98	-0.4484871	98	-0.4669981	98	-0.4975104	98	-0.4421927	98	-0.4167947	98	-0.4364064	98	-0.4002693	98	-0.3979622	98	-0.4234766
98.2	-0.4752652	98.2	-0.5272624	98.2	-0.4619152	98.2	-0.4788679	98.2	-0.503829	98.2	-0.4608969	98.2	-0.4565898	98.2	-0.4469039	98.2	-0.4610265	98.2	-0.4926164	98.2	-0.4451711	98.2	-0.4189367	98.2	-0.4358245	98.2	-0.3999421	98.2	-0.3955024	98.2	-0.426212
98.4	-0.4746959	98.4	-0.5224481	98.4	-0.4604462	98.4	-0.4748018	98.4	-0.5065079	98.4	-0.4643414	98.4	-0.4580778	98.4	-0.4448794	98.4	-0.4649088	98.4	-0.4852805	98.4	-0.4399496	98.4	-0.4178365	98.4	-0.4338775	98.4	-0.3964693	98.4	-0.3985102	98.4	-0.4278053
98.6	-0.4749293	98.6	-0.5226516	98.6	-0.4603351	98.6	-0.4742855	98.6	-0.5028045	98.6	-0.4645337	98.6	-0.4539411	98.6	-0.4440343	98.6	-0.4592826	98.6	-0.487977	98.6	-0.4370755	98.6	-0.414181	98.6	-0.4356868	98.6	-0.3979835	98.6	-0.3951479	98.6	-0.4222292
98.8	-0.4758311	98.8	-0.5218961	98.8	-0.4565798	98.8	-0.4727286	98.8	-0.495341	98.8	-0.4592113	98.8	-0.4554111	98.8	-0.4410831	98.8	-0.4594424	98.8	-0.4886442	98.8	-0.4415497	98.8	-0.4123892	98.8	-0.4360872	98.8	-0.4018749	98.8	-0.3943431	98.8	-0.4198986
99	-0.4792939	99	-0.5226786	99	-0.4540164	99	-0.4751481	99	-0.4942149	99	-0.460968	99	-0.4546258	99	-0.4435972	99	-0.4588892	99	-0.487153	99	-0.4383317	99	-0.4145893	99	-0.4292145	99	-0.3959564	99	-0.3951541	99	-0.4193896
99.2	-0.4744012	99.2	-0.5188443	99.2	-0.4566149	99.2	-0.4722626	99.2	-0.4979913	99.2	-0.4594613	99.2	-0.4545109	99.2	-0.4379756	99.2	-0.4583755	99.2	-0.488048	99.2	-0.4351977	99.2	-0.4103974	99.2	-0.4299604	99.2	-0.3975281	99.2	-0.3884882	99.2	-0.4200514
99.4	-0.4705845	99.4	-0.5167212	99.4	-0.4572703	99.4	-0.4743369	99.4	-0.4974663	99.4	-0.4531111	99.4	-0.4519411	99.4	-0.4396918	99.4	-0.4557776	99.4	-0.4863658	99.4	-0.4392926	99.4	-0.4097754	99.4	-0.4289055	99.4	-0.3928225	99.4	-0.3913499	99.4	-0.4160323
99.6	-0.472608	99.6	-0.5176287	99.6	-0.4546468	99.6	-0.4736852	99.6	-0.4923925	99.6	-0.4579156	99.6	-0.451904	99.6	-0.4365688	99.6	-0.4580185	99.6	-0.4826291	99.6	-0.4332697	99.6	-0.4084633	99.6	-0.4333114	99.6	-0.3884096	99.6	-0.3871016	99.6	-0.4152896
99.8	-0.4721762	99.8	-0.5155174	99.8	-0.4494971	99.8	-0.4711854	99.8	-0.4958877	99.8	-0.4562513	99.8	-0.4501163	99.8	-0.4393758	99.8	-0.4572404	99.8	-0.4789695	99.8	-0.4335594	99.8	-0.4052202	99.8	-0.4276594	99.8	-0.3912878	99.8	-0.3883923	99.8	-0.4152497
100	-0.4652242	100	-0.5165155	100	-0.4523066	100	-0.4694665	100	-0.4910848	100	-0.4519517	100	-0.4472735	100	-0.4409388	100	-0.4514956	100	-0.4833227	100	-0.4342816	100	-0.4057827	100	-0.4280331	100	-0.3933022	100	-0.3855586	100	-0.4153531
100.2	-0.4690193	100.2	-0.5178694	100.2	-0.4472015	100.2	-0.4665226	100.2	-0.4942675	100.2	-0.4557441	100.2	-0.4491359	100.2	-0.4360325	100.2	-0.4515042	100.2	-0.4805234	100.2	-0.4306573	100.2	-0.4084994	100.2	-0.425849	100.2	-0.3911762	100.2	-0.3847547	100.2	-0.4114998
100.4	-0.4715522	100.4	-0.5115167	100.4	-0.445026	100.4	-0.4678875	100.4	-0.4873585	100.4	-0.4521907	100.4	-0.4479896	100.4	-0.4329804	100.4	-0.4543353	100.4	-0.4800631	100.4	-0.4270621	100.4	-0.4043358	100.4	-0.4236106	100.4	-0.386886	100.4	-0.3862903	100.4	-0.4163506
100.6	-0.4642645	100.6	-0.5163414	100.6	-0.4477257	100.6	-0.4662167	100.6	-0.4888113	100.6	-0.4519599	100.6	-0.4466023	100.6	-0.4357407	100.6	-0.4520262	100.6	-0.4816463	100.6	-0.4273244	100.6	-0.402203	100.6	-0.4230166	100.6	-0.3871411	100.6	-0.3870441	100.6	-0.4188644
100.8	-0.4629588	100.8	-0.5127195	100.8	-0.4435841	100.8	-0.4627456	100.8	-0.4859788	100.8	-0.4517581	100.8	-0.4415489	100.8	-0.4332589	100.8	-0.4496402	100.8	-0.4785521	100.8	-0.4294204	100.8	-0.4031225	100.8	-0.4209763	100.8	-0.385119	100.8	-0.3840831	100.8	-0.4128296
101	-0.4652864	101	-0.5149946	101	-0.4477511	101	-0.4640374	101	-0.4838023	101	-0.4519042	101	-0.446599	101	-0.4282342	101	-0.448937	101	-0.4719888	101	-0.4273195	101	-0.397173	101	-0.4228469	101	-0.3841991	101	-0.3861366	101	-0.4110783
101.2	-0.463147	101.2	-0.5081576	101.2	-0.4447673	101.2	-0.4685577	101.2	-0.4827898	101.2	-0.4477196	101.2	-0.4412386	101.2	-0.4302341	101.2	-0.4483447	101.2	-0.474776	101.2	-0.4262796	101.2	-0.3998832	101.2	-0.4222949	101.2	-0.3810368	101.2	-0.38311	101.2	-0.4067297
101.4	-0.4596414	101.4	-0.511061	101.4	-0.443712	101.4	-0.4645764	101.4	-0.490796	101.4	-0.4458504	101.4	-0.4418992	101.4	-0.4289261	101.4	-0.4444595	101.4	-0.475408	101.4	-0.4263985	101.4	-0.4010291	101.4	-0.4196043	101.4	-0.3853273	101.4	-0.3823566	101.4	-0.4105296
101.6	-0.4595909	101.6	-0.5049133	101.6	-0.439475	101.6	-0.4640636	101.6	-0.483337	101.6	-0.4478389	101.6	-0.4448415	101.6	-0.4281043	101.6	-0.4460094	101.6	-0.4694008	101.6	-0.4230084	101.6	-0.400189	101.6	-0.4204142	101.6	-0.383785	101.6	-0.3784684	101.6	-0.4067155
101.8	-0.4646528	101.8	-0.5066528	101.8	-0.4395641	101.8	-0.4592998	101.8	-0.4826095	101.8	-0.449353	101.8	-0.4403922	101.8	-0.430472	101.8	-0.4437975	101.8	-0.4757224	101.8	-0.4275898	101.8	-0.3989873	101.8	-0.4227234	101.8	-0.3855069	101.8	-0.3791925	101.8	-0.4074579
102	-0.4586286	102	-0.5034612	102	-0.4403374	102	-0.458953	102	-0.4804692	102	-0.4418526	102	-0.4377977	102	-0.4265641	102	-0.4446622	102	-0.4714578	102	-0.4216513	102	-0.3999137	102	-0.42039	102	-0.3783694	102	-0.3793499	102	-0.4069386
102.2	-0.4614913	102.2	-0.5052487	102.2	-0.4429239	102.2	-0.4593462	102.2	-0.4829479	102.2	-0.4445533	102.2	-0.4397898	102.2	-0.4268864	102.2	-0.4453714	102.2	-0.4700958	102.2	-0.4213603	102.2	-0.3966205	102.2	-0.4143422	102.2	-0.3811347	102.2	-0.3767907	102.2	-0.4061381
102.4	-0.4573809	102.4	-0.5005811	102.4	-0.4373349	102.4	-0.4568226	102.4	-0.4827015	102.4	-0.4481924	102.4	-0.4352983	102.4	-0.4260732	102.4	-0.4449291	102.4	-0.4676111	102.4	-0.4206638	102.4	-0.3954526	102.4	-0.4148963	102.4	-0.3787861	102.4	-0.3762892	102.4	-0.4022786
102.6	-0.4550687	102.6	-0.5026082	102.6	-0.4365128	102.6	-0.4539021	102.6	-0.4819338	102.6	-0.4440177	102.6	-0.4369855	102.6	-0.4254188	102.6	-0.4426603	102.6	-0.4675995	102.6	-0.4203707	102.6	-0.3969191	102.6	-0.4169749	102.6	-0.3738761	102.6	-0.3773796	102.6	-0.4017498
102.8	-0.45757	102.8	-0.5050348	102.8	-0.4349649	102.8	-0.4610505	102.8	-0.4786562	102.8	-0.4407914	102.8	-0.4320345	102.8	-0.4271571	102.8	-0.4406886	102.8	-0.4639295	102.8	-0.4184038	102.8	-0.3938594	102.8	-0.4137773	102.8	-0.3797349	102.8	-0.3765408	102.8	-0.4017098
103	-0.455048	103	-0.5008729	103	-0.4336243	103	-0.4494488	103	-0.4764139	103	-0.4408637	103	-0.4313851	103	-0.424172	103	-0.4394273	103	-0.4676979	103	-0.4219989	103	-0.390918	103	-0.4105136	103	-0.3763701	103	-0.3688718	103	-0.4005022
103.2	-0.449995	103.2	-0.5021605	103.2	-0.4345129	103.2	-0.4499924	103.2	-0.4778401	103.2	-0.4401078	103.2	-0.4357309	103.2	-0.4209059	103.2	-0.4358604	103.2	-0.4663196	103.2	-0.4167262	103.2	-0.3902007	103.2	-0.4079295	103.2	-0.3743104	103.2	-0.370629	103.2	-0.3976117
103.4	-0.4576047	103.4	-0.4943767	103.4	-0.4330294	103.4	-0.4500997	103.4	-0.4769574	103.4	-0.4370892	103.4	-0.4255632	103.4	-0.4175367	103.4	-0.4339539	103.4	-0.4622529	103.4	-0.4186989	103.4	-0.3917373	103.4	-0.4075648	103.4	-0.3717622	103.4	-0.3697379	103.4	-0.4004436
103.6	-0.4540341	103.6	-0.4979806	103.6	-0.4328856	103.6	-0.4518135	103.6	-0.4736455	103.6	-0.4379531	103.6	-0.4295614	103.6	-0.4166287	103.6	-0.4386496	103.6	-0.4639525	103.6	-0.417803	103.6	-0.3898823	103.6	-0.40751	103.6	-0.3732456	103.6	-0.3691945	103.6	-0.3984309
103.8	-0.4492983	103.8	-0.5008439	103.8	-0.4329197	103.8	-0.451654	103.8	-0.4760469	103.8	-0.4355739	103.8	-0.4295111	103.8	-0.4178428	103.8	-0.4366845	103.8	-0.4643608	103.8	-0.4159825	103.8	-0.3916244	103.8	-0.406992	103.8	-0.3687577	103.8	-0.370719	103.8	-0.3999655
104	-0.4517959	104	-0.4963164	104	-0.4325868	104	-0.4514643	104	-0.4726514	104	-0.4363213	104	-0.4307817	104	-0.4196712	104	-0.4306202	104	-0.461402	104	-0.4166235	104	-0.3858719	104	-0.4044256	104	-0.371441	104	-0.3706284	104	-0.3967101
104.2	-0.4510056	104.2	-0.4948738	104.2	-0.4315939	104.2	-0.4484939	104.2	-0.4729499	104.2	-0.434071	104.2	-0.4276345	104.2	-0.4137437	104.2	-0.4390579	104.2	-0.465464	104.2	-0.4163218	104.2	-0.3875338	104.2	-0.4093815	104.2	-0.3683521	104.2	-0.3689433	104.2	-0.3962773
104.4	-0.4511406	104.4	-0.4957924	104.4	-0.4298566	104.4	-0.4505392	104.4	-0.4682308	104.4	-0.4335669	104.4	-0.4288026	104.4	-0.4165958	104.4	-0.4358981	104.4	-0.4578794	104.4	-0.4096835	104.4	-0.3842165	104.4	-0.4063599	104.4	-0.3637496	104.4	-0.3676099	104.4	-0.3986759
104.6	-0.4505679	104.6	-0.4963796	104.6	-0.4279914	104.6	-0.4437436	104.6	-0.4650168	104.6	-0.4357812	104.6	-0.4257354	104.6	-0.4195775	104.6	-0.4370797	104.6	-0.4586477	104.6	-0.4096602	104.6	-0.3856719	104.6	-0.407364	104.6	-0.3679093	104.6	-0.367295	104.6	-0.3929025
104.8	-0.448093	104.8	-0.4967738	104.8	-0.4290404	104.8	-0.4460943	104.8	-0.4684238	104.8	-0.4291777	104.8	-0.4274305	104.8	-0.414748	104.8	-0.4324873	104.8	-0.4564339	104.8	-0.4116391	104.8	-0.3873935	104.8	-0.407412	104.8	-0.3659781	104.8	-0.3651648	104.8	-0.3925195
105	-0.4499906	105	-0.4946506	105	-0.4242185	105	-0.4448539	105	-0.4711004	105	-0.4290485	105	-0.4249261	105	-0.4150222	105	-0.4320944	105	-0.4569629	105	-0.4089175	105	-0.3856691	105	-0.403062	105	-0.3697636	105	-0.3650237	105	-0.3927667
105.2	-0.4460467	105.2	-0.4885056	105.2	-0.4251733	105.2	-0.4443634	105.2	-0.466971	105.2	-0.4298457	105.2	-0.4230626	105.2	-0.4155519	105.2	-0.4305364	105.2	-0.4577432	105.2	-0.4124151	105.2	-0.3844498	105.2	-0.4016789	105.2	-0.364516	105.2	-0.36496	105.2	-0.3895562
105.4	-0.4489924	105.4	-0.4885182	105.4	-0.4265041	105.4	-0.4346927	105.4	-0.4674647	105.4	-0.4280403	105.4	-0.4247502	105.4	-0.4102323	105.4	-0.4287969	105.4	-0.4568104	105.4	-0.4048866	105.4	-0.382549	105.4	-0.3987145	105.4	-0.3672968	105.4	-0.3666467	105.4	-0.3935957
105.6	-0.4420916	105.6	-0.4923035	105.6	-0.4246238	105.6	-0.441825	105.6	-0.4671486	105.6	-0.4296456	105.6	-0.4235348	105.6	-0.4156014	105.6	-0.4278485	105.6	-0.4568401	105.6	-0.4101112	105.6	-0.3788931	105.6	-0.3994361	105.6	-0.3651584	105.6	-0.3563187	105.6	-0.3913873
105.8	-0.4486091	105.8	-0.4899506	105.8	-0.4220712	105.8	-0.4421529	105.8	-0.4690041	105.8	-0.4262893	105.8	-0.4253826	105.8	-0.4097841	105.8	-0.4256325	105.8	-0.4561237	105.8	-0.4087192	105.8	-0.3817839	105.8	-0.4033251	105.8	-0.3600036	105.8	-0.363875	105.8	-0.3896723
106	-0.441119	106	-0.4859866	106	-0.4277393	106	-0.4402555	106	-0.4633636	106	-0.4278744	106	-0.4212626	106	-0.4075163	106.01	-0.4283408	106.01	-0.4531356	106.01	-0.4024701	106.01	-0.3739007	106.01	-0.394904	106.01	-0.3618083	106.01	-0.3591542	106.01	-0.3870652
106.2	-0.4397694	106.2	-0.4869972	106.2	-0.4213304	106.2	-0.4420536	106.2	-0.4626699	106.2	-0.4264467	106.2	-0.4235643	106.2	-0.412127	106.2	-0.4217753	106.2	-0.4497985	106.2	-0.4042446	106.2	-0.3809778	106.2	-0.3952408	106.2	-0.3647247	106.2	-0.3589693	106.2	-0.3859024
106.4	-0.4418166	106.4	-0.4883231	106.4	-0.4227865	106.4	-0.4397733	106.4	-0.4620028	106.4	-0.426831	106.4	-0.4183335	106.4	-0.4105531	106.4	-0.4268624	106.4	-0.4501466	106.4	-0.4025336	106.4	-0.3792681	106.4	-0.3993791	106.4	-0.3621393	106.4	-0.3578757	106.4	-0.3915274
106.6	-0.4402443	106.6	-0.4895971	106.6	-0.4196199	106.6	-0.4342485	106.6	-0.458195	106.6	-0.419189	106.6	-0.4175567	106.6	-0.4030907	106.6	-0.4277681	106.6	-0.4500104	106.6	-0.4026625	106.6	-0.3790925	106.6	-0.3962744	106.6	-0.3585505	106.6	-0.3597959	106.6	-0.3887999
106.8	-0.4394307	106.8	-0.4853491	106.8	-0.4242414	106.8	-0.4321292	106.8	-0.4600685	106.8	-0.4229812	106.8	-0.4145687	106.8	-0.4108603	106.8	-0.425121	106.8	-0.4549383	106.8	-0.4022489	106.8	-0.3762796	106.8	-0.3934692	106.8	-0.3657226	106.8	-0.3546385	106.8	-0.3849522
107	-0.4344079	107	-0.4824589	107	-0.4202346	107	-0.436302	107	-0.458964	107	-0.4201123	107	-0.4162741	107	-0.4055552	107	-0.4216944	107	-0.4524451	107	-0.3975985	107	-0.3716817	107	-0.3973415	107	-0.3606067	107	-0.3579044	107	-0.3831976
107.2	-0.4370349	107.2	-0.4871314	107.2	-0.4157786	107.2	-0.4379662	107.2	-0.460023	107.2	-0.4220668	107.2	-0.4163547	107.2	-0.4055037	107.2	-0.4293683	107.2	-0.4451217	107.2	-0.403914	107.2	-0.3778014	107.2	-0.3935069	107.2	-0.3567593	107.2	-0.3542997	107.2	-0.3845876
107.4	-0.4344903	107.4	-0.4818805	107.4	-0.4184968	107.4	-0.4388804	107.4	-0.45871	107.4	-0.4215098	107.4	-0.4155111	107.4	-0.4056848	107.4	-0.4215004	107.4	-0.4471846	107.4	-0.4016339	107.4	-0.3769445	107.4	-0.3903488	107.4	-0.3595486	107.4	-0.3545552	107.4	-0.3810301
107.6	-0.436054	107.6	-0.4822321	107.6	-0.4111284	107.6	-0.4334102	107.6	-0.4555203	107.6	-0.4208072	107.6	-0.4127828	107.6	-0.4017323	107.6	-0.4211996	107.6	-0.4453023	107.6	-0.4008001	107.6	-0.3682167	107.6	-0.3972247	107.6	-0.35063	107.6	-0.3518857	107.6	-0.3850332
107.8	-0.4388745	107.8	-0.4842662	107.8	-0.4145038	107.8	-0.4316718	107.8	-0.4562391	107.8	-0.4228425	107.8	-0.4172186	107.8	-0.4022678	107.8	-0.4203496	107.8	-0.4436239	107.8	-0.4023123	107.8	-0.3751391	107.8	-0.3907449	107.8	-0.3563272	107.8	-0.3521161	107.8	-0.3875596
108	-0.435596	108	-0.478876	108	-0.4085687	108	-0.433607	108	-0.4587766	108	-0.417577	108	-0.4164493	108	-0.4040265	108	-0.4199571	108	-0.4432119	108	-0.3995549	108	-0.3755157	108	-0.3962266	108	-0.3595734	108	-0.352131	108	-0.380732
108.2	-0.4327907	108.2	-0.4814821	108.2	-0.4133793	108.2	-0.4349023	108.2	-0.4515226	108.2	-0.4163797	108.2	-0.4095142	108.2	-0.4030135	108.2	-0.4171387	108.2	-0.4422314	108.2	-0.3962494	108.2	-0.366016	108.2	-0.3854033	108.2	-0.3509046	108.2	-0.3515843	108.2	-0.3831163
108.4	-0.4302177	108.4	-0.4806422	108.4	-0.4148998	108.4	-0.4310312	108.4	-0.4576898	108.4	-0.4190449	108.4	-0.4080131	108.4	-0.3974423	108.4	-0.4207344	108.4	-0.443956	108.4	-0.3967444	108.4	-0.3689359	108.4	-0.3916	108.4	-0.3516499	108.4	-0.354012	108.4	-0.3792825
108.6	-0.4258973	108.6	-0.4816023	108.6	-0.4093577	108.6	-0.4313382	108.6	-0.4547561	108.6	-0.4184766	108.6	-0.4098712	108.6	-0.3975459	108.6	-0.4180717	108.6	-0.4494974	108.6	-0.3963845	108.6	-0.3691335	108.6	-0.3845846	108.6	-0.3523977	108.6	-0.3525148	108.6	-0.379148
108.8	-0.4348335	108.8	-0.4784524	108.8	-0.4124837	108.8	-0.430206	108.8	-0.4500635	108.8	-0.41788	108.8	-0.4138269	108.8	-0.4018209	108.8	-0.4168026	108.8	-0.4364576	108.8	-0.3937317	108.8	-0.3710278	108.8	-0.3903499	108.8	-0.3567752	108.8	-0.3517981	108.8	-0.3788997
109	-0.4288189	109	-0.472258	109	-0.4115995	109	-0.4270701	109	-0.4522363	109	-0.4130682	109	-0.4067452	109	-0.401801	109	-0.4182346	109	-0.4421388	109	-0.3951344	109	-0.3678283	109	-0.3877902	109	-0.3547509	109	-0.352618	109	-0.3745854
109.2	-0.4308245	109.2	-0.4794728	109.2	-0.4101831	109.2	-0.4323523	109.2	-0.4541552	109.2	-0.4141886	109.2	-0.4051861	109.2	-0.3998375	109.2	-0.4153613	109.2	-0.4415403	109.2	-0.3956999	109.2	-0.3684666	109.2	-0.3883267	109.2	-0.3480792	109.2	-0.348043	109.2	-0.3773686
109.4	-0.4297207	109.4	-0.4758097	109.4	-0.4100178	109.4	-0.4270604	109.4	-0.4453378	109.4	-0.416711	109.4	-0.4101257	109.4	-0.3996964	109.4	-0.4140713	109.4	-0.4366779	109.4	-0.3899926	109.4	-0.3687209	109.4	-0.3871863	109.4	-0.3470289	109.4	-0.3487105	109.4	-0.3797514
109.6	-0.432135	109.6	-0.4750356	109.6	-0.4087462	109.6	-0.4306369	109.6	-0.45108	109.6	-0.4176255	109.6	-0.4078676	109.6	-0.3957647	109.6	-0.414543	109.6	-0.4415244	109.6	-0.3894477	109.6	-0.3653219	109.6	-0.3830742	109.6	-0.3490703	109.6	-0.3508153	109.6	-0.3733883
109.8	-0.4335724	109.8	-0.478584	109.8	-0.4094323	109.8	-0.4174424	109.8	-0.4512056	109.8	-0.4121847	109.8	-0.4048679	109.8	-0.3960908	109.8	-0.414815	109.8	-0.4405611	109.8	-0.3930726	109.8	-0.3607911	109.8	-0.3823124	109.8	-0.3523647	109.8	-0.3469803	109.8	-0.3758829
110	-0.4316073	110	-0.4736079	110	-0.407728	110	-0.430928	110	-0.448254	110	-0.412654	110	-0.4057469	110	-0.3920376	110	-0.4140014	110	-0.4369591	110	-0.3921756	110	-0.3621029	110	-0.380408	110	-0.3502259	110	-0.3456222	110	-0.3764341
110.2	-0.4288251	110.2	-0.474528	110.2	-0.4030257	110.2	-0.4299555	110.2	-0.4439453	110.2	-0.4132131	110.2	-0.4062459	110.2	-0.3932351	110.2	-0.4118079	110.2	-0.4357616	110.2	-0.3910717	110.2	-0.363241	110.2	-0.3831476	110.2	-0.3469381	110.2	-0.344332	110.2	-0.3728102
110.4	-0.4288349	110.4	-0.4685164	110.4	-0.4044915	110.4	-0.4248311	110.4	-0.4484614	110.4	-0.4108069	110.4	-0.4048673	110.4	-0.3910582	110.4	-0.4112319	110.4	-0.4399714	110.4	-0.3920989	110.4	-0.3680157	110.4	-0.3817344	110.4	-0.3503875	110.4	-0.3422559	110.4	-0.3768517
110.6	-0.4236458	110.6	-0.465245	110.6	-0.4088988	110.6	-0.4219033	110.6	-0.4463012	110.6	-0.4091477	110.6	-0.3996533	110.6	-0.3892523	110.6	-0.4097441	110.6	-0.4352171	110.6	-0.3870572	110.6	-0.3654184	110.6	-0.3791801	110.6	-0.3453841	110.6	-0.3457542	110.6	-0.374675
110.8	-0.4247374	110.8	-0.4686174	110.8	-0.408873	110.8	-0.4245762	110.8	-0.4436563	110.8	-0.4092712	110.8	-0.4049943	110.8	-0.3909819	110.8	-0.4095109	110.8	-0.4357559	110.8	-0.3902708	110.8	-0.3641516	110.8	-0.3793468	110.8	-0.3404093	110.8	-0.3417089	110.8	-0.3738656
111	-0.425697	111	-0.4655152	111	-0.4048043	111	-0.4253569	111	-0.4462397	111	-0.4118842	111	-0.4026129	111	-0.3917422	111	-0.4088745	111	-0.4344546	111	-0.3900408	111	-0.3610028	111	-0.3778587	111	-0.3461124	111	-0.3401979	111	-0.3725502
111.2	-0.419899	111.2	-0.4687694	111.2	-0.4053235	111.2	-0.4249423	111.2	-0.4470319	111.2	-0.4086967	111.2	-0.4013804	111.2	-0.3879525	111.2	-0.4086459	111.2	-0.4363729	111.2	-0.3878608	111.2	-0.3623703	111.2	-0.3794811	111.2	-0.3488268	111.2	-0.343751	111.2	-0.3694681
111.4	-0.4224409	111.4	-0.4688818	111.4	-0.4026546	111.4	-0.4264265	111.4	-0.4422687	111.4	-0.4057389	111.4	-0.4001471	111.4	-0.3871917	111.4	-0.4076858	111.4	-0.4312484	111.4	-0.3848926	111.4	-0.3600892	111.4	-0.3784795	111.4	-0.3427781	111.4	-0.3397873	111.4	-0.3732249
111.6	-0.4219429	111.6	-0.4682829	111.6	-0.4037348	111.6	-0.4173338	111.6	-0.4398269	111.6	-0.4068398	111.6	-0.398428	111.6	-0.3920385	111.6	-0.4100334	111.6	-0.4320234	111.6	-0.3868873	111.6	-0.3618159	111.6	-0.379933	111.6	-0.3457985	111.6	-0.335842	111.6	-0.3724492
111.8	-0.4159887	111.8	-0.4680929	111.8	-0.4044084	111.8	-0.4231533	111.8	-0.4359439	111.8	-0.407448	111.8	-0.3984354	111.8	-0.3888301	111.8	-0.4086012	111.8	-0.4351844	111.8	-0.3829106	111.8	-0.359026	111.8	-0.3817317	111.8	-0.3436952	111.8	-0.341785	111.8	-0.3714336
112	-0.4190649	112	-0.4665707	112	-0.4009868	112	-0.420891	112	-0.4399166	112	-0.4049913	112	-0.398616	112	-0.3886172	112	-0.4049902	112	-0.4302377	112	-0.3838382	112	-0.3553825	112	-0.375309	112	-0.3402961	112	-0.3426362	112	-0.3639949
112.2	-0.4211974	112.2	-0.4688843	112.2	-0.3996557	112.2	-0.4232131	112.2	-0.4414933	112.2	-0.4029244	112.2	-0.3984684	112.2	-0.3925854	112.2	-0.4024748	112.2	-0.4334424	112.2	-0.38301	112.2	-0.357941	112.2	-0.3736164	112.2	-0.3378311	112.2	-0.3348966	112.2	-0.365212
112.4	-0.4218988	112.4	-0.4635656	112.4	-0.3990234	112.4	-0.4182402	112.4	-0.4420731	112.4	-0.4049385	112.4	-0.395306	112.4	-0.3856409	112.4	-0.4052658	112.4	-0.4305249	112.4	-0.3849562	112.4	-0.3522468	112.4	-0.3773143	112.4	-0.3440217	112.4	-0.3372248	112.4	-0.3679356
112.6	-0.4228603	112.6	-0.4604347	112.6	-0.3995604	112.6	-0.4168347	112.6	-0.4385816	112.6	-0.401024	112.6	-0.3992128	112.6	-0.3868856	112.6	-0.4035462	112.6	-0.4310028	112.6	-0.3810028	112.6	-0.3557416	112.6	-0.3727839	112.6	-0.3414466	112.6	-0.3343219	112.6	-0.3626014
112.8	-0.416686	112.8	-0.4645626	112.8	-0.4009351	112.8	-0.4182353	112.8	-0.4415413	112.8	-0.4056748	112.8	-0.3944516	112.8	-0.3853928	112.8	-0.400943	112.8	-0.4294871	112.8	-0.379236	112.8	-0.355271	112.8	-0.3711635	112.8	-0.3387535	112.8	-0.3404797	112.8	-0.3686326
113	-0.4210251	113	-0.4619095	113	-0.4008614	113	-0.4175746	113	-0.434681	113	-0.4006687	113	-0.3944033	113	-0.381446	113	-0.4033361	113	-0.4248113	113	-0.3801827	113	-0.351469	113	-0.373383	113	-0.34176	113	-0.3365371	113	-0.3701873
113.2	-0.420297	113.2	-0.4648116	113.2	-0.3964337	113.2	-0.4157743	113.2	-0.4382385	113.2	-0.4014018	113.2	-0.3932451	113.2	-0.3805853	113.2	-0.4015951	113.2	-0.4257459	113.2	-0.3814367	113.2	-0.3519042	113.2	-0.3736192	113.2	-0.3377554	113.2	-0.338154	113.2	-0.3680309
113.4	-0.4157127	113.4	-0.4593499	113.4	-0.3959586	113.4	-0.4131441	113.4	-0.4348325	113.4	-0.4023778	113.4	-0.3918765	113.4	-0.3806323	113.4	-0.4027844	113.4	-0.4249838	113.4	-0.376862	113.4	-0.3542304	113.4	-0.3741283	113.4	-0.3364685	113.4	-0.3351933	113.4	-0.3676657
113.6	-0.4156425	113.6	-0.4604307	113.6	-0.3971479	113.6	-0.4185403	113.6	-0.435452	113.6	-0.402227	113.6	-0.3948693	113.6	-0.3795872	113.6	-0.4024093	113.6	-0.4270239	113.6	-0.380049	113.6	-0.3558113	113.6	-0.3775714	113.6	-0.3351111	113.6	-0.3320062	113.6	-0.3692887
113.8	-0.4145397	113.8	-0.4610249	113.8	-0.392318	113.8	-0.4138579	113.8	-0.4362354	113.8	-0.3965447	113.8	-0.3928973	113.8	-0.37931	113.8	-0.4019794	113.8	-0.4206534	113.8	-0.380062	113.8	-0.3556251	113.8	-0.3719999	113.8	-0.3355175	113.8	-0.3356034	113.8	-0.3606819
114	-0.4147076	114	-0.4595314	114	-0.395309	114	-0.4169531	114	-0.4407434	114	-0.3993985	114	-0.3893627	114	-0.3807985	114	-0.3966212	114	-0.4193099	114	-0.3772805	114	-0.3489963	114	-0.372114	114	-0.3396389	114	-0.3312872	114	-0.3681258
114.2	-0.4174221	114.2	-0.4614874	114.2	-0.3932641	114.2	-0.4110011	114.2	-0.4349494	114.2	-0.4012585	114.2	-0.3935273	114.2	-0.3800038	114.2	-0.4001257	114.2	-0.4274894	114.2	-0.3755969	114.2	-0.34465	114.2	-0.3693455	114.2	-0.3329103	114.2	-0.3363054	114.2	-0.3600989
114.4	-0.4132251	114.4	-0.4607881	114.4	-0.3923528	114.4	-0.4136559	114.4	-0.4328829	114.4	-0.3973356	114.4	-0.3902006	114.4	-0.3839538	114.4	-0.3981337	114.4	-0.4226515	114.4	-0.3743014	114.4	-0.3483077	114.4	-0.3703679	114.4	-0.3286887	114.4	-0.3305333	114.4	-0.3616484
114.6	-0.4154811	114.6	-0.4587677	114.6	-0.3980784	114.6	-0.4086439	114.6	-0.4294705	114.6	-0.3950895	114.6	-0.3886733	114.6	-0.3785018	114.6	-0.3974041	114.6	-0.423999	114.6	-0.3728358	114.6	-0.3502285	114.6	-0.3702365	114.6	-0.337233	114.6	-0.3289394	114.6	-0.3611885
114.8	-0.4093337	114.8	-0.4572631	114.8	-0.3939199	114.8	-0.412715	114.8	-0.432784	114.8	-0.3912911	114.8	-0.3909699	114.8	-0.3823379	114.8	-0.3934081	114.8	-0.4193681	114.8	-0.3696023	114.8	-0.3478633	114.8	-0.3707896	114.8	-0.3357022	114.8	-0.3277354	114.8	-0.3613415
115	-0.4102943	115	-0.4553345	115	-0.3916566	115	-0.4097887	115	-0.4341989	115	-0.3963326	115	-0.3905753	115	-0.3760976	115	-0.3972163	115	-0.4234938	115	-0.3744683	115	-0.3519166	115	-0.3652013	115	-0.3315845	115	-0.3318065	115	-0.3597836
115.2	-0.4142453	115.2	-0.453812	115.2	-0.3927622	115.2	-0.4124405	115.2	-0.4324397	115.2	-0.3975777	115.2	-0.3873484	115.2	-0.3771651	115.2	-0.3939381	115.2	-0.4203462	115.2	-0.3750099	115.2	-0.3487161	115.2	-0.3706924	115.2	-0.3352607	115.2	-0.326136	115.2	-0.3539151
115.4	-0.4137914	115.4	-0.4581628	115.4	-0.3913235	115.4	-0.4106762	115.4	-0.430189	115.4	-0.3986286	115.4	-0.3923568	115.4	-0.3749805	115.4	-0.3893701	115.4	-0.4192686	115.4	-0.3728334	115.4	-0.343318	115.4	-0.3677367	115.4	-0.3327198	115.4	-0.3265054	115.4	-0.3593229
115.6	-0.4093103	115.6	-0.4502681	115.6	-0.3853531	115.6	-0.4114616	115.6	-0.4292891	115.6	-0.3967321	115.6	-0.3828506	115.6	-0.3793531	115.6	-0.3914221	115.6	-0.4163696	115.6	-0.37062	115.6	-0.3473991	115.6	-0.3651928	115.6	-0.3298692	115.6	-0.331499	115.6	-0.3589188
115.8	-0.4057812	115.8	-0.4575906	115.8	-0.3909	115.8	-0.4061881	115.8	-0.4286662	115.8	-0.3933579	115.8	-0.388685	115.8	-0.3791481	115.8	-0.3913195	115.8	-0.4148481	115.8	-0.3731524	115.8	-0.344715	115.8	-0.3637008	115.8	-0.333042	115.8	-0.3268091	115.8	-0.3596281
116	-0.4112271	116	-0.4559504	116	-0.3861782	116	-0.4095158	116	-0.428328	116	-0.3961178	116	-0.3815592	116	-0.3764008	116	-0.3924807	116	-0.4168203	116	-0.3735678	116	-0.3433572	116	-0.3640691	116	-0.3286147	116	-0.3304646	116	-0.3552381
116.2	-0.4077639	116.2	-0.4554083	116.2	-0.3851896	116.2	-0.4072034	116.2	-0.429198	116.2	-0.3931825	116.2	-0.3829947	116.2	-0.3721203	116.2	-0.3895305	116.2	-0.4167861	116.2	-0.3704371	116.2	-0.3447008	116.2	-0.3620517	116.2	-0.3274305	116.2	-0.3261386	116.2	-0.3583137
116.4	-0.4095654	116.4	-0.4495717	116.4	-0.3874653	116.4	-0.4046979	116.4	-0.4319036	116.4	-0.3953702	116.4	-0.3873403	116.4	-0.377381	116.4	-0.3940191	116.4	-0.4178644	116.4	-0.3727085	116.4	-0.3426652	116.4	-0.3627521	116.4	-0.3312614	116.4	-0.3239764	116.4	-0.3547481
116.6	-0.4081634	116.6	-0.4541261	116.6	-0.3867505	116.6	-0.4081956	116.6	-0.4302721	116.6	-0.3926608	116.6	-0.3869519	116.6	-0.3765136	116.6	-0.390132	116.6	-0.4173777	116.6	-0.3671572	116.6	-0.3443599	116.6	-0.3623686	116.6	-0.328467	116.6	-0.3228963	116.6	-0.3510999
116.8	-0.4083847	116.8	-0.4490592	116.8	-0.3836526	116.8	-0.4100355	116.8	-0.4278897	116.8	-0.3881251	116.8	-0.3866453	116.8	-0.3742894	116.8	-0.3881939	116.8	-0.4133754	116.8	-0.3719417	116.8	-0.3439975	116.8	-0.3591927	116.8	-0.3279393	116.8	-0.3226549	116.8	-0.3585392
117	-0.4108853	117	-0.4559313	117	-0.3864766	117	-0.4084564	117	-0.4264417	117	-0.3921481	117	-0.3815435	117	-0.3723359	117	-0.3910727	117	-0.4191666	117	-0.3686194	117	-0.346111	117	-0.360872	117	-0.3288206	117	-0.3231035	117	-0.3563455
117.2	-0.4086628	117.2	-0.4503855	117.2	-0.3879421	117.2	-0.4060908	117.2	-0.4330856	117.2	-0.3888527	117.2	-0.3803049	117.2	-0.3705323	117.2	-0.3882226	117.2	-0.4117195	117.2	-0.3676585	117.2	-0.3424754	117.2	-0.3627832	117.2	-0.3274287	117.2	-0.3232332	117.2	-0.3522269
117.4	-0.4006784	117.4	-0.4514247	117.4	-0.3850932	117.4	-0.4077542	117.4	-0.4225681	117.4	-0.385996	117.4	-0.3821917	117.4	-0.3738772	117.4	-0.3871921	117.4	-0.4159785	117.4	-0.367968	117.4	-0.3423475	117.4	-0.3602602	117.4	-0.3257912	117.4	-0.3246588	117.4	-0.3532192
117.6	-0.3999731	117.6	-0.4505983	117.6	-0.3860955	117.6	-0.4086474	117.6	-0.4291387	117.6	-0.3886081	117.6	-0.3831223	117.6	-0.3724646	117.6	-0.390101	117.6	-0.4175936	117.6	-0.367564	117.6	-0.340742	117.6	-0.357004	117.6	-0.3275158	117.6	-0.3206848	117.6	-0.3544209
117.8	-0.4028345	117.8	-0.448522	117.8	-0.3832864	117.8	-0.4042193	117.8	-0.4253776	117.8	-0.385457	117.8	-0.3785131	117.8	-0.3731042	117.8	-0.388335	117.8	-0.4152399	117.8	-0.3656288	117.8	-0.3406566	117.8	-0.3550519	117.8	-0.3244076	117.8	-0.3217105	117.8	-0.3539277
118	-0.4027508	118	-0.4472402	118	-0.3836198	118	-0.4001958	118	-0.4222388	118	-0.3879289	118	-0.3746009	118	-0.3700944	118	-0.3839422	118	-0.4154358	118	-0.3638367	118	-0.3376062	118	-0.3604981	118	-0.3226486	118	-0.3182674	118	-0.3554831
118.2	-0.406539	118.2	-0.4516936	118.2	-0.379336	118.2	-0.4037445	118.2	-0.4248759	118.2	-0.3865066	118.2	-0.3763975	118.2	-0.3731871	118.2	-0.3896772	118.2	-0.4116654	118.2	-0.365433	118.2	-0.3367119	118.2	-0.354112	118.2	-0.326121	118.2	-0.3219726	118.2	-0.3479587
118.4	-0.401543	118.4	-0.4483171	118.4	-0.3804675	118.4	-0.4015034	118.4	-0.4217446	118.4	-0.384255	118.4	-0.3773773	118.4	-0.3728974	118.4	-0.3895868	118.4	-0.4130028	118.4	-0.3705258	118.4	-0.3384193	118.4	-0.3622112	118.4	-0.3210952	118.4	-0.3148619	118.4	-0.3492692
118.6	-0.4039842	118.6	-0.4500503	118.6	-0.3802224	118.6	-0.4027268	118.6	-0.4224536	118.6	-0.3825335	118.6	-0.3786227	118.6	-0.3659202	118.6	-0.3914504	118.6	-0.412525	118.6	-0.3659224	118.6	-0.3358626	118.6	-0.3550248	118.6	-0.3251551	118.6	-0.3178213	118.6	-0.349725
118.8	-0.4018563	118.8	-0.4466549	118.8	-0.3801822	118.8	-0.4029543	118.8	-0.4230586	118.8	-0.3820725	118.8	-0.3768622	118.8	-0.3660753	118.8	-0.38984	118.8	-0.4071742	118.8	-0.3628983	118.8	-0.3386523	118.8	-0.3519734	118.8	-0.323949	118.8	-0.3193418	118.8	-0.347833
119	-0.3999242	119	-0.4454792	119	-0.3813147	119	-0.3992899	119	-0.4211327	119	-0.3815706	119	-0.3778332	119	-0.3659412	119	-0.3884102	119	-0.4104214	119	-0.3617767	119	-0.340759	119	-0.360486	119	-0.3206522	119	-0.3210277	119	-0.34891
119.2	-0.4026602	119.2	-0.4473652	119.2	-0.3803193	119.2	-0.4006764	119.2	-0.4172692	119.2	-0.3825175	119.2	-0.3748921	119.2	-0.3680733	119.2	-0.3873083	119.2	-0.4065791	119.2	-0.3630362	119.2	-0.3368472	119.2	-0.3562746	119.2	-0.3197021	119.2	-0.3164814	119.2	-0.3509898
119.4	-0.3950973	119.4	-0.4455518	119.4	-0.3793339	119.4	-0.4044887	119.4	-0.4206181	119.4	-0.3844856	119.4	-0.3760125	119.4	-0.3649729	119.4	-0.3815371	119.4	-0.4055801	119.4	-0.36171	119.4	-0.3341335	119.4	-0.3566101	119.4	-0.3164146	119.4	-0.3181508	119.4	-0.3474796
119.6	-0.4015063	119.6	-0.4437282	119.6	-0.3812417	119.6	-0.4011756	119.6	-0.4203246	119.6	-0.3861815	119.6	-0.3769304	119.6	-0.3615705	119.6	-0.380051	119.6	-0.4063599	119.6	-0.3588833	119.6	-0.3376754	119.6	-0.3539217	119.6	-0.3150957	119.6	-0.316466	119.6	-0.3500592
119.8	-0.3974863	119.8	-0.4404501	119.8	-0.3747003	119.8	-0.3988578	119.8	-0.42269	119.8	-0.3822311	119.8	-0.3791663	119.8	-0.3677341	119.8	-0.3819193	119.8	-0.4088017	119.8	-0.3631618	119.8	-0.3335778	119.8	-0.355019	119.8	-0.3214089	119.8	-0.3197246	119.8	-0.3448031
120	-0.4047731	120	-0.4441846	120	-0.3775328	120	-0.3966203	120	-0.4220711	120	-0.3809235	120	-0.3731682	120	-0.3619359	120	-0.3816229	120	-0.4090962	120	-0.3652513	120	-0.3355357	120	-0.3544707	120	-0.3220069	120	-0.3107089	120	-0.3472755
120.2	-0.4010248	120.2	-0.4417878	120.2	-0.3760511	120.2	-0.3955151	120.2	-0.4204158	120.2	-0.3842297	120.2	-0.3762879	120.2	-0.3621125	120.2	-0.3794938	120.2	-0.4080062	120.2	-0.3552436	120.2	-0.3336671	120.2	-0.3533925	120.2	-0.3207909	120.2	-0.3126942	120.2	-0.3518142
120.4	-0.399042	120.4	-0.4465798	120.4	-0.3750401	120.4	-0.3979425	120.4	-0.4203204	120.4	-0.3805693	120.4	-0.3706566	120.4	-0.3665634	120.4	-0.3860439	120.4	-0.4086921	120.4	-0.3594625	120.4	-0.333101	120.4	-0.3520256	120.4	-0.3201467	120.4	-0.3167089	120.4	-0.3483032
120.6	-0.3988591	120.6	-0.443159	120.6	-0.3772305	120.6	-0.3914648	120.6	-0.4193226	120.6	-0.3815815	120.6	-0.3726426	120.6	-0.3626103	120.6	-0.381354	120.6	-0.4052584	120.6	-0.3599033	120.6	-0.3357428	120.6	-0.3512149	120.6	-0.3156157	120.6	-0.3156842	120.6	-0.3483955
120.8	-0.3987828	120.8	-0.4435333	120.8	-0.3754734	120.8	-0.3969604	120.8	-0.4181474	120.8	-0.3789673	120.8	-0.3721099	120.8	-0.3610475	120.8	-0.3800292	120.8	-0.4051783	120.8	-0.3601601	120.8	-0.3306876	120.8	-0.3544728	120.8	-0.3187141	120.8	-0.3127839	120.8	-0.3461938
121	-0.3977195	121	-0.4444774	121	-0.379381	121	-0.399834	121	-0.4167317	121	-0.3795516	121	-0.3698115	121	-0.3641733	121	-0.3860905	121	-0.4033813	121	-0.3596492	121	-0.3342236	121	-0.3525996	121	-0.3182043	121	-0.3128885	121	-0.3448855
121.2	-0.3935397	121.2	-0.4420283	121.2	-0.3754752	121.2	-0.3949375	121.2	-0.4118242	121.2	-0.3799488	121.2	-0.3713997	121.2	-0.3613464	121.2	-0.3813287	121.2	-0.4118083	121.2	-0.3600315	121.2	-0.333985	121.2	-0.3486961	121.2	-0.3174414	121.2	-0.314168	121.2	-0.3475593
121.4	-0.3941744	121.4	-0.4401931	121.4	-0.373461	121.4	-0.3920478	121.4	-0.4127626	121.4	-0.3788736	121.4	-0.3710799	121.4	-0.3628004	121.4	-0.3796364	121.4	-0.4046777	121.4	-0.361888	121.4	-0.3303014	121.4	-0.3509079	121.4	-0.3206068	121.4	-0.3107783	121.4	-0.3482962
121.6	-0.3955373	121.6	-0.4418619	121.6	-0.3695844	121.6	-0.3990588	121.6	-0.414409	121.6	-0.3820922	121.6	-0.370195	121.6	-0.3633853	121.6	-0.3810513	121.6	-0.402304	121.6	-0.3589427	121.6	-0.327992	121.6	-0.3482814	121.6	-0.3167949	121.6	-0.3113446	121.6	-0.3423292
121.8	-0.4012812	121.8	-0.4391112	121.8	-0.3707126	121.8	-0.3945256	121.8	-0.4125967	121.8	-0.3755037	121.8	-0.367143	121.8	-0.3610559	121.8	-0.3838713	121.8	-0.4023882	121.8	-0.3581154	121.8	-0.3301651	121.8	-0.349414	121.8	-0.3123489	121.8	-0.3102892	121.8	-0.3435673
122	-0.3915442	122	-0.4370789	122	-0.3721392	122	-0.391252	122	-0.4172885	122	-0.3804432	122	-0.3741963	122	-0.362541	122	-0.3811127	122	-0.4004835	122	-0.3516603	122	-0.3323915	122	-0.347486	122	-0.3138309	122	-0.3157355	122	-0.3390109
122.2	-0.3928794	122.2	-0.4328616	122.2	-0.3696563	122.2	-0.3920044	122.2	-0.4111103	122.2	-0.378951	122.2	-0.3704705	122.2	-0.3595535	122.2	-0.3770741	122.2	-0.4052782	122.2	-0.3579132	122.2	-0.3322755	122.2	-0.34537	122.2	-0.3157092	122.2	-0.3112312	122.2	-0.3414961
122.4	-0.3957851	122.4	-0.4397056	122.4	-0.3752698	122.4	-0.3963149	122.4	-0.4124138	122.4	-0.3741566	122.4	-0.3665543	122.4	-0.35482	122.4	-0.3734433	122.4	-0.4003035	122.4	-0.3557833	122.4	-0.3240286	122.4	-0.347096	122.4	-0.3169281	122.4	-0.310722	122.4	-0.3399657
122.6	-0.3947954	122.6	-0.4342497	122.6	-0.373711	122.6	-0.392292	122.6	-0.413188	122.6	-0.3747947	122.6	-0.3655338	122.6	-0.3542307	122.6	-0.375236	122.6	-0.4030215	122.6	-0.3515039	122.6	-0.3287018	122.6	-0.3499234	122.6	-0.3118375	122.6	-0.3097423	122.6	-0.3378181
122.8	-0.3937113	122.8	-0.4330847	122.8	-0.3680388	122.8	-0.3938143	122.8	-0.4114017	122.8	-0.374908	122.8	-0.3670802	122.8	-0.3610823	122.8	-0.3759326	122.8	-0.4000871	122.8	-0.3515387	122.8	-0.3299536	122.8	-0.3440664	122.8	-0.3140456	122.8	-0.3041359	122.8	-0.3422716
123	-0.3899348	123	-0.4321473	123	-0.3670504	123	-0.3904108	123	-0.4079464	123	-0.3760822	123	-0.362782	123	-0.3568455	123	-0.3744827	123	-0.4034654	123	-0.3496078	123	-0.327581	123	-0.3459254	123	-0.3108669	123	-0.3077467	123	-0.3384072
123.2	-0.3880996	123.2	-0.4383985	123.2	-0.3690175	123.2	-0.3887801	123.2	-0.4091898	123.2	-0.3749945	123.2	-0.3672791	123.2	-0.3568786	123.2	-0.3737775	123.2	-0.4006287	123.2	-0.3511131	123.2	-0.328176	123.2	-0.3499404	123.2	-0.3111344	123.2	-0.3075461	123.2	-0.3415213
123.4	-0.392305	123.4	-0.4347619	123.4	-0.3658007	123.4	-0.3922313	123.4	-0.4123666	123.4	-0.3728167	123.4	-0.3657564	123.4	-0.3571926	123.4	-0.3744846	123.4	-0.3975752	123.4	-0.3520042	123.4	-0.3227369	123.4	-0.3442849	123.4	-0.3079021	123.4	-0.3072692	123.4	-0.3419131
123.6	-0.3881299	123.6	-0.4325789	123.6	-0.3668947	123.6	-0.3927926	123.6	-0.4061579	123.6	-0.3736432	123.6	-0.3681441	123.6	-0.3585854	123.6	-0.3722775	123.6	-0.3995387	123.6	-0.3510416	123.6	-0.3232216	123.6	-0.3457248	123.6	-0.3120569	123.6	-0.3027863	123.6	-0.3388523
123.8	-0.3852042	123.8	-0.4366673	123.8	-0.3657039	123.8	-0.3854268	123.8	-0.4105829	123.8	-0.3712466	123.8	-0.3679915	123.8	-0.3529311	123.8	-0.3748188	123.8	-0.3932133	123.8	-0.3484836	123.8	-0.3317473	123.8	-0.3429113	123.8	-0.3108245	123.8	-0.3094867	123.8	-0.3354278
124	-0.3888952	124	-0.434163	124	-0.3690142	124	-0.3875709	124	-0.4090392	124	-0.37514	124	-0.3608147	124	-0.3540081	124	-0.3754731	124	-0.3997226	124	-0.3469229	124	-0.3258005	124	-0.3432171	124	-0.3078097	124	-0.309883	124	-0.3386824
124.2	-0.3852109	124.2	-0.4391433	124.2	-0.3669362	124.2	-0.3877785	124.2	-0.4131497	124.2	-0.3720127	124.2	-0.3650379	124.2	-0.3519429	124.2	-0.3760722	124.2	-0.3992608	124.2	-0.3502278	124.2	-0.3217456	124.2	-0.3443615	124.2	-0.3104997	124.2	-0.3082363	124.2	-0.3344775
124.4	-0.3871399	124.4	-0.4291097	124.4	-0.3659984	124.4	-0.3868861	124.4	-0.4100763	124.4	-0.3764504	124.4	-0.3675385	124.4	-0.3507755	124.4	-0.3687113	124.4	-0.4003375	124.4	-0.3466991	124.4	-0.323906	124.4	-0.3436866	124.4	-0.3088054	124.4	-0.3018044	124.4	-0.3375338
124.6	-0.3894933	124.6	-0.4357682	124.6	-0.3629566	124.6	-0.3822257	124.6	-0.4087281	124.6	-0.3708139	124.6	-0.3617487	124.6	-0.3522435	124.6	-0.3733079	124.6	-0.3999582	124.6	-0.349657	124.6	-0.3257648	124.6	-0.3409375	124.6	-0.3078763	124.6	-0.3074395	124.6	-0.3379999
124.8	-0.3918332	124.8	-0.4385227	124.8	-0.3644249	124.8	-0.3881668	124.8	-0.4064739	124.8	-0.3742262	124.8	-0.359976	124.8	-0.3544014	124.8	-0.3730673	124.8	-0.3958001	124.8	-0.3514659	124.8	-0.3236505	124.8	-0.3391907	124.8	-0.3091406	124.8	-0.3079966	124.8	-0.3358739
125	-0.3899502	125	-0.434441	125	-0.3615945	125	-0.3873383	125	-0.4046644	125	-0.3679269	125	-0.3618878	125	-0.3502628	125	-0.373545	125	-0.3929844	125	-0.3496974	125	-0.3230903	125	-0.3421537	125	-0.3073071	125	-0.304364	125	-0.3368674
125.2	-0.3836414	125.2	-0.4278235	125.2	-0.3629984	125.2	-0.3886014	125.2	-0.403785	125.2	-0.3708559	125.2	-0.3651103	125.2	-0.3521928	125.2	-0.3700088	125.2	-0.3963317	125.2	-0.3424871	125.2	-0.3219287	125.2	-0.3392837	125.2	-0.3089415	125.2	-0.3045909	125.2	-0.332891
125.4	-0.3917885	125.4	-0.4308361	125.4	-0.3654128	125.4	-0.3861036	125.4	-0.404965	125.4	-0.3664645	125.4	-0.3620604	125.4	-0.3526362	125.4	-0.3674822	125.4	-0.392086	125.4	-0.3464711	125.4	-0.3221793	125.4	-0.3399774	125.4	-0.3087648	125.4	-0.301576	125.4	-0.3374786
125.6	-0.3829111	125.6	-0.4311354	125.6	-0.3633536	125.6	-0.3840833	125.6	-0.4059502	125.6	-0.3712412	125.6	-0.3568847	125.6	-0.3507044	125.6	-0.3727819	125.6	-0.3980851	125.6	-0.3468203	125.6	-0.3175529	125.6	-0.3381189	125.6	-0.3028778	125.6	-0.3020195	125.6	-0.3380023
125.8	-0.3822284	125.8	-0.4300699	125.8	-0.3627357	125.8	-0.3835289	125.8	-0.4067807	125.8	-0.366426	125.8	-0.3614927	125.8	-0.3532986	125.8	-0.3711934	125.8	-0.3960811	125.8	-0.3440365	125.8	-0.3212741	125.8	-0.3346611	125.8	-0.3030061	125.8	-0.3006357	125.8	-0.3346776
126	-0.3874276	126	-0.4283855	126	-0.3599946	126	-0.3838278	126	-0.4001698	126	-0.36667	126	-0.3587296	126	-0.3487591	126.02	-0.3685074	126.02	-0.396692	126.02	-0.3456373	126.02	-0.3183915	126.02	-0.3382421	126.02	-0.3070772	126.02	-0.2999834	126.02	-0.334869
126.2	-0.384117	126.2	-0.4272426	126.2	-0.3649446	126.2	-0.3825031	126.2	-0.3996299	126.2	-0.3716068	126.2	-0.3624867	126.2	-0.3530168	126.2	-0.3682298	126.2	-0.3940126	126.2	-0.3429104	126.2	-0.3182259	126.2	-0.3413173	126.2	-0.302877	126.2	-0.2986116	126.2	-0.3309475
126.4	-0.3870035	126.4	-0.4281046	126.4	-0.3633566	126.4	-0.383624	126.4	-0.4043519	126.4	-0.3643123	126.4	-0.362423	126.4	-0.3538499	126.4	-0.3694881	126.4	-0.394224	126.4	-0.3448133	126.4	-0.3195602	126.4	-0.3366927	126.4	-0.3031535	126.4	-0.2976111	126.4	-0.3340692
126.6	-0.3846709	126.6	-0.4285598	126.6	-0.3573877	126.6	-0.3842668	126.6	-0.4034429	126.6	-0.3677074	126.6	-0.3570489	126.6	-0.3485997	126.6	-0.3668018	126.6	-0.3938482	126.6	-0.3422797	126.6	-0.3213351	126.6	-0.3395842	126.6	-0.3009833	126.6	-0.3000008	126.6	-0.333216
126.8	-0.3844127	126.8	-0.4288191	126.8	-0.3616773	126.8	-0.3786792	126.8	-0.4005375	126.8	-0.3667168	126.8	-0.3564855	126.8	-0.349445	126.8	-0.3663132	126.8	-0.392828	126.8	-0.3455622	126.8	-0.3185847	126.8	-0.3350213	126.8	-0.2981584	126.8	-0.2977737	126.8	-0.3319967
127	-0.381105	127	-0.4289231	127	-0.3623429	127	-0.3806639	127	-0.4009283	127	-0.3676321	127	-0.3541025	127	-0.3451481	127	-0.3710875	127	-0.3892851	127	-0.3398586	127	-0.3175331	127	-0.3356831	127	-0.3028952	127	-0.2962628	127	-0.329736
127.2	-0.3866222	127.2	-0.423917	127.2	-0.3604476	127.2	-0.3805236	127.2	-0.4024694	127.2	-0.3627642	127.2	-0.3604747	127.2	-0.3429499	127.2	-0.3649737	127.2	-0.3938643	127.2	-0.3457594	127.2	-0.3209967	127.2	-0.3356344	127.2	-0.2996813	127.2	-0.2986067	127.2	-0.3324522
127.4	-0.3805676	127.4	-0.4288686	127.4	-0.3554135	127.4	-0.3814873	127.4	-0.3969819	127.4	-0.3621748	127.4	-0.357402	127.4	-0.3504774	127.4	-0.3640091	127.4	-0.3908162	127.4	-0.3427513	127.4	-0.3181406	127.4	-0.3337417	127.4	-0.3012867	127.4	-0.2943303	127.4	-0.3360854
127.6	-0.3805385	127.6	-0.421995	127.6	-0.3582711	127.6	-0.3829661	127.6	-0.3982461	127.6	-0.3624207	127.6	-0.3566547	127.6	-0.3441793	127.6	-0.3659391	127.6	-0.3900619	127.6	-0.3423049	127.6	-0.3146563	127.6	-0.3363671	127.6	-0.3029104	127.6	-0.2985865	127.6	-0.3306453
127.8	-0.3828893	127.8	-0.4241391	127.8	-0.3561261	127.8	-0.3810712	127.8	-0.3990821	127.8	-0.3645385	127.8	-0.3553174	127.8	-0.3496948	127.8	-0.3659266	127.8	-0.3895192	127.8	-0.3440557	127.8	-0.315813	127.8	-0.335876	127.8	-0.3021838	127.8	-0.2983279	127.8	-0.3298984
128	-0.3814681	128	-0.4186053	128	-0.356468	128	-0.383461	128	-0.3979121	128	-0.3608892	128	-0.3580619	128	-0.3444555	128	-0.3670645	128	-0.3857342	128	-0.3404733	128	-0.3091759	128	-0.333346	128	-0.301498	128	-0.2939383	128	-0.3276671
128.2	-0.379844	128.2	-0.4249258	128.2	-0.3562158	128.2	-0.380497	128.2	-0.3944517	128.2	-0.3642988	128.2	-0.3552913	128.2	-0.3447427	128.2	-0.3630688	128.2	-0.3863341	128.2	-0.3380063	128.2	-0.3143563	128.2	-0.3398423	128.2	-0.3004	128.2	-0.290512	128.2	-0.3305576
128.4	-0.3804874	128.4	-0.4264343	128.4	-0.3561744	128.4	-0.38233	128.4	-0.3972683	128.4	-0.3623275	128.4	-0.3587732	128.4	-0.3446735	128.4	-0.3671646	128.4	-0.3876677	128.4	-0.3396111	128.4	-0.3199337	128.4	-0.3299781	128.4	-0.2997491	128.4	-0.2938647	128.4	-0.3274589
128.6	-0.3815535	128.6	-0.4233755	128.6	-0.355048	128.6	-0.372638	128.6	-0.401911	128.6	-0.3637547	128.6	-0.3527166	128.6	-0.3432407	128.6	-0.3631315	128.6	-0.3875197	128.6	-0.3388728	128.6	-0.3147851	128.6	-0.3322257	128.6	-0.2995817	128.6	-0.2914013	128.6	-0.3281024
128.8	-0.3748239	128.8	-0.4255307	128.8	-0.3552887	128.8	-0.3788869	128.8	-0.4003031	128.8	-0.3636913	128.8	-0.3552139	128.8	-0.3462457	128.8	-0.3617354	128.8	-0.3900784	128.8	-0.3411699	128.8	-0.3101954	128.8	-0.3332435	128.8	-0.3002062	128.8	-0.2889619	128.8	-0.3278621
129	-0.3809395	129	-0.4206873	129	-0.3562624	129	-0.3784785	129	-0.3986727	129	-0.3597341	129	-0.3543334	129	-0.3426813	129	-0.3613181	129	-0.3879829	129	-0.339847	129	-0.3157439	129	-0.3299219	129	-0.2990182	129	-0.2882898	129	-0.3225448
129.2	-0.3800766	129.2	-0.4175788	129.2	-0.3546837	129.2	-0.3747942	129.2	-0.3962834	129.2	-0.3594815	129.2	-0.3524594	129.2	-0.34505	129.2	-0.3666946	129.2	-0.3856331	129.2	-0.3375425	129.2	-0.3125557	129.2	-0.3305252	129.2	-0.2944173	129.2	-0.2937632	129.2	-0.3283309
129.4	-0.3795162	129.4	-0.4190361	129.4	-0.3551311	129.4	-0.3761992	129.4	-0.3947411	129.4	-0.3601445	129.4	-0.3564799	129.4	-0.3468961	129.4	-0.3576974	129.4	-0.3909628	129.4	-0.3401883	129.4	-0.3094017	129.4	-0.3322747	129.4	-0.2949446	129.4	-0.2928914	129.4	-0.3255093
129.6	-0.3758755	129.6	-0.4240212	129.6	-0.3586875	129.6	-0.3779946	129.6	-0.3963557	129.6	-0.3620535	129.6	-0.3523076	129.6	-0.3417314	129.6	-0.3601053	129.6	-0.3854021	129.6	-0.3343829	129.6	-0.3113267	129.6	-0.3300442	129.6	-0.2976037	129.6	-0.2941053	129.6	-0.3257271
129.8	-0.3843075	129.8	-0.4205233	129.8	-0.3528015	129.8	-0.3770478	129.8	-0.3932647	129.8	-0.3617873	129.8	-0.350813	129.8	-0.3463022	129.8	-0.3632464	129.8	-0.3863077	129.8	-0.3370144	129.8	-0.3146733	129.8	-0.3317952	129.8	-0.2966905	129.8	-0.292358	129.8	-0.3289073
130	-0.3784239	130	-0.4194684	130	-0.3493665	130	-0.3808737	130	-0.3935881	130	-0.3554094	130	-0.3462819	130	-0.3476002	130	-0.3601484	130	-0.3866768	130	-0.3322341	130	-0.3132416	130	-0.3281789	130	-0.2960683	130	-0.2908502	130	-0.3245251
130.2	-0.3753186	130.2	-0.4211204	130.2	-0.3531856	130.2	-0.3762927	130.2	-0.3962032	130.2	-0.3582005	130.2	-0.347953	130.2	-0.344583	130.2	-0.3575442	130.2	-0.3809619	130.2	-0.3322489	130.2	-0.3126469	130.2	-0.330337	130.2	-0.2908396	130.2	-0.2887173	130.2	-0.3277032
130.4	-0.3780045	130.4	-0.4200277	130.4	-0.35282	130.4	-0.3768333	130.4	-0.3974508	130.4	-0.3595027	130.4	-0.3483966	130.4	-0.3445997	130.4	-0.359881	130.4	-0.3812289	130.4	-0.3317509	130.4	-0.3071783	130.4	-0.3339618	130.4	-0.2930247	130.4	-0.2855841	130.4	-0.3280351
130.6	-0.3822646	130.6	-0.4169895	130.6	-0.3507438	130.6	-0.3721258	130.6	-0.3928297	130.6	-0.3602508	130.6	-0.3484268	130.6	-0.3403475	130.6	-0.3585746	130.6	-0.3826516	130.6	-0.3364007	130.6	-0.3136318	130.6	-0.323429	130.6	-0.2987294	130.6	-0.2889087	130.6	-0.3259383
130.8	-0.3777885	130.8	-0.4187953	130.8	-0.3510914	130.8	-0.3729303	130.8	-0.3950563	130.8	-0.3584725	130.8	-0.3483571	130.8	-0.3442864	130.8	-0.3614983	130.8	-0.377266	130.8	-0.3341477	130.8	-0.3080198	130.8	-0.3301048	130.8	-0.2939405	130.8	-0.288713	130.8	-0.324099
131	-0.3786408	131	-0.4240861	131	-0.3529539	131	-0.3778053	131	-0.3964842	131	-0.3576578	131	-0.3480141	131	-0.3405396	131	-0.3593802	131	-0.3815707	131	-0.3327368	131	-0.3075962	131	-0.3297591	131	-0.2937287	131	-0.2886084	131	-0.3249911
131.2	-0.3752658	131.2	-0.4158199	131.2	-0.3502566	131.2	-0.3704938	131.2	-0.3936643	131.2	-0.3603596	131.2	-0.348633	131.2	-0.3421796	131.2	-0.3528201	131.2	-0.3793249	131.2	-0.3372026	131.2	-0.3092734	131.2	-0.3224304	131.2	-0.2957221	131.2	-0.2846247	131.2	-0.324323
131.4	-0.3718072	131.4	-0.4178802	131.4	-0.3521586	131.4	-0.3724773	131.4	-0.3948282	131.4	-0.3568074	131.4	-0.3494849	131.4	-0.3398289	131.4	-0.3597817	131.4	-0.3818246	131.4	-0.3322255	131.4	-0.3089972	131.4	-0.328634	131.4	-0.2932799	131.4	-0.2874483	131.4	-0.3212087
131.6	-0.373532	131.6	-0.4164568	131.6	-0.3483122	131.6	-0.3718996	131.6	-0.3917181	131.6	-0.3555038	131.6	-0.3445719	131.6	-0.3378893	131.6	-0.3535815	131.6	-0.3788875	131.6	-0.3324274	131.6	-0.306912	131.6	-0.3247326	131.6	-0.2950294	131.6	-0.2897696	131.6	-0.3240535
131.8	-0.3731261	131.8	-0.4218109	131.8	-0.3451281	131.8	-0.3713343	131.8	-0.3910348	131.8	-0.3516275	131.8	-0.3445185	131.8	-0.3346741	131.8	-0.3596002	131.8	-0.3793867	131.8	-0.3329496	131.8	-0.3078261	131.8	-0.326318	131.8	-0.2935407	131.8	-0.2883475	131.8	-0.3209085
132	-0.3748936	132	-0.417227	132	-0.3505835	132	-0.3703157	132	-0.3949695	132	-0.3539506	132	-0.3510921	132	-0.3363352	132	-0.3580456	132	-0.3794046	132	-0.3344328	132	-0.3108197	132	-0.3282795	132	-0.2897294	132	-0.2831293	132	-0.3219281
132.2	-0.3677427	132.2	-0.4160644	132.2	-0.3507532	132.2	-0.3701713	132.2	-0.3920434	132.2	-0.3543716	132.2	-0.3434155	132.2	-0.339648	132.2	-0.3553888	132.2	-0.3787057	132.2	-0.3330605	132.2	-0.3098519	132.2	-0.3239094	132.2	-0.2911527	132.2	-0.290101	132.2	-0.3242506
132.4	-0.3737946	132.4	-0.4152372	132.4	-0.3484676	132.4	-0.371594	132.4	-0.3911737	132.4	-0.3525711	132.4	-0.3434577	132.4	-0.3375914	132.4	-0.354376	132.4	-0.3770377	132.4	-0.3292181	132.4	-0.3050787	132.4	-0.3260563	132.4	-0.293269	132.4	-0.2874325	132.4	-0.3201219
132.6	-0.3753541	132.6	-0.4162794	132.6	-0.3462628	132.6	-0.3728628	132.6	-0.3933128	132.6	-0.3532097	132.6	-0.3469389	132.6	-0.3377812	132.6	-0.3566902	132.6	-0.3754999	132.6	-0.3286355	132.6	-0.3074454	132.6	-0.3287486	132.6	-0.2940847	132.6	-0.2863731	132.6	-0.321275
132.8	-0.3703936	132.8	-0.4130667	132.8	-0.3503404	132.8	-0.3707604	132.8	-0.3877389	132.8	-0.3503162	132.8	-0.3462472	132.8	-0.3382077	132.8	-0.3583635	132.8	-0.3796698	132.8	-0.3292233	132.8	-0.3045339	132.8	-0.3219223	132.8	-0.2914515	132.8	-0.2867973	132.8	-0.3225408
133	-0.3684488	133	-0.4121002	133	-0.349076	133	-0.3700484	133	-0.3882943	133	-0.3548407	133	-0.3469297	133	-0.3328683	133	-0.3525719	133	-0.3749203	133	-0.3256007	133	-0.3055729	133	-0.3198042	133	-0.292803	133	-0.283603	133	-0.3225113
133.2	-0.3717323	133.2	-0.4137248	133.2	-0.3477524	133.2	-0.3682358	133.2	-0.3892905	133.2	-0.3520868	133.2	-0.3469405	133.2	-0.3393279	133.2	-0.3534413	133.2	-0.3808231	133.2	-0.3280079	133.2	-0.3053162	133.2	-0.3188221	133.2	-0.2890369	133.2	-0.2821142	133.2	-0.318582
133.4	-0.3762191	133.4	-0.4170998	133.4	-0.3439718	133.4	-0.3703944	133.4	-0.3896426	133.4	-0.355907	133.4	-0.3444783	133.4	-0.3391992	133.4	-0.3547702	133.4	-0.3824935	133.4	-0.3274344	133.4	-0.3023783	133.4	-0.3224881	133.4	-0.2929817	133.4	-0.2810761	133.4	-0.321957
133.6	-0.3711976	133.6	-0.4149792	133.6	-0.3480347	133.6	-0.3654583	133.6	-0.3912567	133.6	-0.3531541	133.6	-0.3430203	133.6	-0.3320937	133.6	-0.3512007	133.6	-0.3732085	133.6	-0.3300024	133.6	-0.3052149	133.6	-0.3198705	133.6	-0.2945173	133.6	-0.2825357	133.6	-0.31869
133.8	-0.3638369	133.8	-0.4106223	133.8	-0.3451997	133.8	-0.3654386	133.8	-0.389335	133.8	-0.3530132	133.8	-0.3396868	133.8	-0.3323108	133.8	-0.3575543	133.8	-0.3782024	133.8	-0.3261487	133.8	-0.3020101	133.8	-0.3217179	133.8	-0.287982	133.8	-0.283913	133.8	-0.3189208
134	-0.3716142	134	-0.4148151	134	-0.3477477	134	-0.3693552	134	-0.3885173	134	-0.3520522	134	-0.3412	134	-0.3391435	134	-0.3534263	134	-0.3754131	134	-0.3280257	134	-0.3014468	134	-0.3208011	134	-0.2812245	134	-0.2835298	134	-0.3186846
134.2	-0.3722364	134.2	-0.4127652	134.2	-0.3450711	134.2	-0.3655958	134.2	-0.3847806	134.2	-0.3535293	134.2	-0.3424627	134.2	-0.3353824	134.2	-0.3522831	134.2	-0.3754219	134.2	-0.3269025	134.2	-0.3101858	134.2	-0.3202403	134.2	-0.2833788	134.2	-0.2826163	134.2	-0.321873
134.4	-0.3733441	134.4	-0.4137971	134.4	-0.3452367	134.4	-0.367806	134.4	-0.3880479	134.4	-0.3485395	134.4	-0.3419595	134.4	-0.3294506	134.4	-0.3514796	134.4	-0.3731613	134.4	-0.3274526	134.4	-0.3008181	134.4	-0.318521	134.4	-0.2895803	134.4	-0.2797979	134.4	-0.3164215
134.6	-0.3697927	134.6	-0.410041	134.6	-0.3428853	134.6	-0.3654417	134.6	-0.3828711	134.6	-0.3490541	134.6	-0.3395787	134.6	-0.3289334	134.6	-0.3506359	134.6	-0.3756364	134.6	-0.3273605	134.6	-0.3010806	134.6	-0.3225509	134.6	-0.2885023	134.6	-0.2822007	134.6	-0.3159161
134.8	-0.3665315	134.8	-0.4122832	134.8	-0.3453307	134.8	-0.3676119	134.8	-0.3851914	134.8	-0.3477122	134.8	-0.3406925	134.8	-0.3321608	134.8	-0.3546057	134.8	-0.3731187	134.8	-0.324714	134.8	-0.2992799	134.8	-0.3206089	134.8	-0.2871536	134.8	-0.2789205	134.8	-0.3156009
135	-0.3647471	135	-0.4095238	135	-0.3429638	135	-0.3675727	135	-0.3880381	135	-0.350463	135	-0.3396392	135	-0.3329895	135	-0.3498795	135	-0.3749453	135	-0.3217972	135	-0.3033603	135	-0.3188337	135	-0.2862042	135	-0.2791693	135	-0.3173728
135.2	-0.3672867	135.2	-0.4096221	135.2	-0.344757	135.2	-0.3688301	135.2	-0.382418	135.2	-0.3482995	135.2	-0.3393029	135.2	-0.3321506	135.2	-0.3492441	135.2	-0.3746143	135.2	-0.3266035	135.2	-0.3012034	135.2	-0.3158898	135.2	-0.2862839	135.2	-0.2789065	135.2	-0.3212799
135.4	-0.3650869	135.4	-0.4099967	135.4	-0.3426895	135.4	-0.365674	135.4	-0.3883055	135.4	-0.3519304	135.4	-0.3439142	135.4	-0.3278807	135.4	-0.3525911	135.4	-0.3732592	135.4	-0.3235357	135.4	-0.2954248	135.4	-0.3198434	135.4	-0.2830064	135.4	-0.28101	135.4	-0.3171201
135.6	-0.3649368	135.6	-0.4096645	135.6	-0.343798	135.6	-0.3667303	135.6	-0.3838259	135.6	-0.3506422	135.6	-0.335525	135.6	-0.3319466	135.6	-0.3497923	135.6	-0.3739075	135.6	-0.3236797	135.6	-0.299066	135.6	-0.3188188	135.6	-0.2794157	135.6	-0.2835712	135.6	-0.3150656
135.8	-0.3686618	135.8	-0.4061222	135.8	-0.3394617	135.8	-0.3687766	135.8	-0.3807197	135.8	-0.3456811	135.8	-0.3375089	135.8	-0.3278318	135.8	-0.3521043	135.8	-0.3706254	135.8	-0.3268307	135.8	-0.2981767	135.8	-0.3177552	135.8	-0.287391	135.8	-0.2799274	135.8	-0.313814
136	-0.3693705	136	-0.4065194	136	-0.3418765	136	-0.3662801	136	-0.3836859	136	-0.3478271	136	-0.3367818	136	-0.333663	136	-0.345584	136	-0.3700332	136	-0.3268304	136	-0.3036775	136	-0.3191032	136	-0.2809074	136	-0.2750932	136	-0.3127598
136.2	-0.3627134	136.2	-0.4109699	136.2	-0.3387564	136.2	-0.3638619	136.2	-0.3844021	136.2	-0.3464018	136.2	-0.3396337	136.2	-0.3302595	136.2	-0.35036	136.2	-0.3711023	136.2	-0.3236676	136.2	-0.2965623	136.2	-0.3183424	136.2	-0.2838978	136.2	-0.2764659	136.2	-0.3157787
136.4	-0.3694928	136.4	-0.4096585	136.4	-0.3406186	136.4	-0.3639716	136.4	-0.387911	136.4	-0.3453057	136.4	-0.3395367	136.4	-0.3311593	136.4	-0.3496965	136.4	-0.3690569	136.4	-0.3203649	136.4	-0.2986714	136.4	-0.3148975	136.4	-0.2836486	136.4	-0.278265	136.4	-0.31504
136.6	-0.361499	136.6	-0.4069749	136.6	-0.3414676	136.6	-0.3603671	136.6	-0.3799652	136.6	-0.343341	136.6	-0.3406206	136.6	-0.3261189	136.6	-0.3506306	136.6	-0.3703142	136.6	-0.3197193	136.6	-0.2977159	136.6	-0.3200823	136.6	-0.2856385	136.6	-0.2805878	136.6	-0.3098547
136.8	-0.3624505	136.8	-0.4087385	136.8	-0.3408448	136.8	-0.3636146	136.8	-0.3792621	136.8	-0.3463457	136.8	-0.3318722	136.8	-0.3316388	136.8	-0.3438037	136.8	-0.3711574	136.8	-0.320574	136.8	-0.2962428	136.8	-0.3186619	136.8	-0.2868835	136.8	-0.2796118	136.8	-0.3119509
137	-0.3603086	137	-0.4083851	137	-0.3407405	137	-0.3596984	137	-0.3821539	137	-0.3434145	137	-0.3368026	137	-0.3268277	137	-0.3452938	137	-0.3686613	137	-0.3213441	137	-0.3032333	137	-0.3154497	137	-0.2855248	137	-0.2789132	137	-0.3129843
137.2	-0.3628785	137.2	-0.4059114	137.2	-0.3385794	137.2	-0.3603455	137.2	-0.3814008	137.2	-0.3462601	137.2	-0.3358591	137.2	-0.3300351	137.2	-0.3472113	137.2	-0.3691112	137.2	-0.3241944	137.2	-0.2999566	137.2	-0.3153582	137.2	-0.2858782	137.2	-0.2812811	137.2	-0.3154933
137.4	-0.3612043	137.4	-0.4072053	137.4	-0.3377493	137.4	-0.3627251	137.4	-0.3852993	137.4	-0.3410572	137.4	-0.3380395	137.4	-0.3321069	137.4	-0.3460233	137.4	-0.3646396	137.4	-0.3237984	137.4	-0.2942763	137.4	-0.313534	137.4	-0.2836443	137.4	-0.2746941	137.4	-0.3135056
137.6	-0.3609911	137.6	-0.4116966	137.6	-0.3369851	137.6	-0.3615063	137.6	-0.377718	137.6	-0.3435277	137.6	-0.3359348	137.6	-0.3268076	137.6	-0.3522143	137.6	-0.372089	137.6	-0.3243906	137.6	-0.2919886	137.6	-0.3183441	137.6	-0.2807277	137.6	-0.2706551	137.6	-0.316069
137.8	-0.3622498	137.8	-0.4079155	137.8	-0.3354004	137.8	-0.3635752	137.8	-0.382982	137.8	-0.3446427	137.8	-0.333953	137.8	-0.3250065	137.8	-0.3518814	137.8	-0.3686466	137.8	-0.3172364	137.8	-0.2935732	137.8	-0.3089037	137.8	-0.2790591	137.8	-0.2744581	137.8	-0.3123904
138	-0.3620736	138	-0.4110582	138	-0.3353814	138	-0.3679745	138	-0.3796987	138	-0.3426031	138	-0.3342084	138	-0.3271126	138	-0.3481376	138	-0.3640815	138	-0.3170133	138	-0.2950423	138	-0.3145175	138	-0.2825494	138	-0.279672	138	-0.3163129
138.2	-0.3636083	138.2	-0.4038327	138.2	-0.332284	138.2	-0.3639193	138.2	-0.3832905	138.2	-0.3456715	138.2	-0.3349443	138.2	-0.3258783	138.2	-0.3446991	138.2	-0.3643273	138.2	-0.3175994	138.2	-0.2926818	138.2	-0.3133073	138.2	-0.2775484	138.2	-0.2759991	138.2	-0.3137763
138.4	-0.3636928	138.4	-0.4051185	138.4	-0.3330342	138.4	-0.3574088	138.4	-0.3818412	138.4	-0.3431905	138.4	-0.3344818	138.4	-0.3309976	138.4	-0.3436376	138.4	-0.3668852	138.4	-0.3192716	138.4	-0.2917569	138.4	-0.3168518	138.4	-0.2835236	138.4	-0.2709487	138.4	-0.3097067
138.6	-0.3604192	138.6	-0.4054676	138.6	-0.3361346	138.6	-0.360568	138.6	-0.3776416	138.6	-0.3416043	138.6	-0.3336788	138.6	-0.3263569	138.6	-0.3438609	138.6	-0.3647452	138.6	-0.3180912	138.6	-0.2968838	138.6	-0.3128922	138.6	-0.2801723	138.6	-0.2740272	138.6	-0.3093838
138.8	-0.3592754	138.8	-0.4081696	138.8	-0.3340066	138.8	-0.3573791	138.8	-0.3756818	138.8	-0.3438262	138.8	-0.3333271	138.8	-0.3274868	138.8	-0.3447898	138.8	-0.3665043	138.8	-0.3170558	138.8	-0.2890292	138.8	-0.3114159	138.8	-0.2818316	138.8	-0.2737819	138.8	-0.3059636
139	-0.364107	139	-0.4037533	139	-0.3359972	139	-0.3561565	139	-0.3769749	139	-0.3401057	139	-0.3299959	139	-0.326606	139	-0.3425424	139	-0.3711141	139	-0.3187312	139	-0.295692	139	-0.3089902	139	-0.2792565	139	-0.2770841	139	-0.3109018
139.2	-0.3641059	139.2	-0.4019347	139.2	-0.3378969	139.2	-0.3573807	139.2	-0.3785497	139.2	-0.3417853	139.2	-0.3310699	139.2	-0.3247209	139.2	-0.3434723	139.2	-0.3677444	139.2	-0.3177632	139.2	-0.2945722	139.2	-0.3127145	139.2	-0.2831257	139.2	-0.2722951	139.2	-0.3093703
139.4	-0.359435	139.4	-0.4048546	139.4	-0.336668	139.4	-0.3560336	139.4	-0.3795378	139.4	-0.3405974	139.4	-0.3306752	139.4	-0.3228497	139.4	-0.3425127	139.4	-0.3636984	139.4	-0.3174438	139.4	-0.2933372	139.4	-0.3119793	139.4	-0.2776771	139.4	-0.2726292	139.4	-0.3077236
139.6	-0.3626896	139.6	-0.4048714	139.6	-0.3367193	139.6	-0.3572409	139.6	-0.3809939	139.6	-0.3391008	139.6	-0.3323397	139.6	-0.3234526	139.6	-0.3440347	139.6	-0.3695926	139.6	-0.3158712	139.6	-0.2913271	139.6	-0.3107198	139.6	-0.2797749	139.6	-0.2751249	139.6	-0.3058565
139.8	-0.3585441	139.8	-0.4047221	139.8	-0.3333251	139.8	-0.3591794	139.8	-0.3684717	139.8	-0.3392698	139.8	-0.3353504	139.8	-0.3267318	139.8	-0.3442038	139.8	-0.3645412	139.8	-0.3188424	139.8	-0.2901191	139.8	-0.3086775	139.8	-0.2776557	139.8	-0.2732528	139.8	-0.3089927
140	-0.3564976	140	-0.4044697	140	-0.3313027	140	-0.3586147	140	-0.374507	140	-0.3388959	140	-0.330825	140	-0.3228275	140	-0.3443168	140	-0.3620754	140	-0.3179118	140	-0.2893831	140	-0.3132387	140	-0.2776335	140	-0.2720163	140	-0.305081
140.2	-0.3592088	140.2	-0.4048259	140.2	-0.3335563	140.2	-0.3558293	140.2	-0.3752933	140.2	-0.3478555	140.2	-0.3282592	140.2	-0.3197509	140.2	-0.3436447	140.2	-0.3631285	140.2	-0.3173493	140.2	-0.2933636	140.2	-0.3111808	140.2	-0.2722191	140.2	-0.2709846	140.2	-0.3100856
140.4	-0.3554049	140.4	-0.4005934	140.4	-0.3359907	140.4	-0.3548274	140.4	-0.3777077	140.4	-0.3383318	140.4	-0.3269811	140.4	-0.3230864	140.4	-0.338699	140.4	-0.3621954	140.4	-0.3129524	140.4	-0.2901751	140.4	-0.3096689	140.4	-0.276721	140.4	-0.271436	140.4	-0.3078145
140.6	-0.35902	140.6	-0.403105	140.6	-0.3336654	140.6	-0.3567832	140.6	-0.3732609	140.6	-0.3417603	140.6	-0.3301971	140.6	-0.3233401	140.6	-0.3413605	140.6	-0.3650868	140.6	-0.3146288	140.6	-0.2932746	140.6	-0.308607	140.6	-0.2754626	140.6	-0.2732613	140.6	-0.308369
140.8	-0.3585215	140.8	-0.4001869	140.8	-0.3304298	140.8	-0.3571306	140.8	-0.3708086	140.8	-0.3396457	140.8	-0.3296602	140.8	-0.3206264	140.8	-0.3397687	140.8	-0.3606951	140.8	-0.3161267	140.8	-0.2865725	140.8	-0.3075523	140.8	-0.2751147	140.8	-0.2781509	140.8	-0.3057347
141	-0.3547343	141	-0.4011517	141	-0.3332351	141	-0.3524414	141	-0.3753294	141	-0.3402148	141	-0.3288004	141	-0.3231962	141	-0.3412776	141	-0.3621585	141	-0.3152913	141	-0.2895275	141	-0.3093668	141	-0.2748023	141	-0.2654738	141	-0.3062662
141.2	-0.3556306	141.2	-0.4028996	141.2	-0.3295579	141.2	-0.3533215	141.2	-0.3763405	141.2	-0.3371266	141.2	-0.3338922	141.2	-0.3171076	141.2	-0.3418469	141.2	-0.3699394	141.2	-0.3133906	141.2	-0.2886149	141.2	-0.3076117	141.2	-0.2753305	141.2	-0.2678843	141.2	-0.3026475
141.4	-0.3577397	141.4	-0.3990413	141.4	-0.3336805	141.4	-0.3571843	141.4	-0.3774471	141.4	-0.3386508	141.4	-0.3324907	141.4	-0.324239	141.4	-0.3394664	141.4	-0.3629154	141.4	-0.3138782	141.4	-0.2901522	141.4	-0.3110347	141.4	-0.2727995	141.4	-0.2694157	141.4	-0.3057785
141.6	-0.3556969	141.6	-0.4013605	141.6	-0.329008	141.6	-0.3536561	141.6	-0.3711056	141.6	-0.3325241	141.6	-0.3283253	141.6	-0.3233573	141.6	-0.3358467	141.6	-0.3589386	141.6	-0.3122534	141.6	-0.2850417	141.6	-0.3067477	141.6	-0.2732317	141.6	-0.2686985	141.6	-0.3042211
141.8	-0.356646	141.8	-0.3947243	141.8	-0.3292142	141.8	-0.3558049	141.8	-0.3765341	141.8	-0.337509	141.8	-0.3316374	141.8	-0.3254241	141.8	-0.3398559	141.8	-0.3633476	141.8	-0.3114979	141.8	-0.2868813	141.8	-0.3110476	141.8	-0.2740905	141.8	-0.2728462	141.8	-0.3052182
142	-0.3581257	142	-0.3985808	142	-0.3273277	142	-0.3532214	142	-0.375237	142	-0.3356776	142	-0.3319286	142	-0.3218819	142	-0.3393793	142	-0.3648396	142	-0.3095123	142	-0.2875532	142	-0.3068705	142	-0.2732063	142	-0.2673073	142	-0.3014616
142.2	-0.3543805	142.2	-0.3999431	142.2	-0.3306085	142.2	-0.350671	142.2	-0.3746207	142.2	-0.3370256	142.2	-0.3274199	142.2	-0.320057	142.2	-0.3346293	142.2	-0.3559527	142.2	-0.3087611	142.2	-0.2871107	142.2	-0.3081506	142.2	-0.273076	142.2	-0.2704811	142.2	-0.3056237
142.4	-0.3503545	142.4	-0.3944078	142.4	-0.3307361	142.4	-0.3537204	142.4	-0.3730552	142.4	-0.3335229	142.4	-0.3277041	142.4	-0.319938	142.4	-0.3390221	142.4	-0.3577709	142.4	-0.3104057	142.4	-0.2864177	142.4	-0.3053968	142.4	-0.2735622	142.4	-0.2689442	142.4	-0.2996511
142.6	-0.3584487	142.6	-0.400542	142.6	-0.3280111	142.6	-0.3577875	142.6	-0.3693942	142.6	-0.3365024	142.6	-0.3249673	142.6	-0.3222829	142.6	-0.3342371	142.6	-0.3570236	142.6	-0.3119498	142.6	-0.2880825	142.6	-0.3034931	142.6	-0.2743813	142.6	-0.2634649	142.6	-0.3033272
142.8	-0.350394	142.8	-0.3946511	142.8	-0.3269708	142.8	-0.3539092	142.8	-0.3728781	142.8	-0.3378412	142.8	-0.3263808	142.8	-0.3225203	142.8	-0.3372891	142.8	-0.3568631	142.8	-0.3106324	142.8	-0.2875787	142.8	-0.3046464	142.8	-0.2733813	142.8	-0.2681518	142.8	-0.2986112
143	-0.3535486	143	-0.3935094	143	-0.3294564	143	-0.3567392	143	-0.3692685	143	-0.3325841	143	-0.3217303	143	-0.3205555	143	-0.3343838	143	-0.3590832	143	-0.305816	143	-0.2890202	143	-0.3075301	143	-0.2700826	143	-0.271181	143	-0.3035649
143.2	-0.3515129	143.2	-0.3927042	143.2	-0.325834	143.2	-0.3500414	143.2	-0.3714298	143.2	-0.336857	143.2	-0.3249271	143.2	-0.3160893	143.2	-0.3365692	143.2	-0.3587773	143.2	-0.3109106	143.2	-0.2838754	143.2	-0.3046951	143.2	-0.2732302	143.2	-0.2669301	143.2	-0.3039387
143.4	-0.3513854	143.4	-0.3937084	143.4	-0.3334101	143.4	-0.3509389	143.4	-0.3728008	143.4	-0.337018	143.4	-0.3251902	143.4	-0.316251	143.4	-0.3342748	143.4	-0.3601151	143.4	-0.3112003	143.4	-0.2838092	143.4	-0.3075813	143.4	-0.2693937	143.4	-0.2665119	143.4	-0.3088448
143.6	-0.3532789	143.6	-0.3974138	143.6	-0.3276649	143.6	-0.3535296	143.6	-0.3681677	143.6	-0.3361316	143.6	-0.3234992	143.6	-0.3206196	143.6	-0.3392184	143.6	-0.3600943	143.6	-0.3068971	143.6	-0.285397	143.6	-0.3029183	143.6	-0.2704601	143.6	-0.2647196	143.6	-0.3016369
143.8	-0.3537948	143.8	-0.3965355	143.8	-0.3236264	143.8	-0.3492233	143.8	-0.3701123	143.8	-0.3332199	143.8	-0.3240804	143.8	-0.3193059	143.8	-0.3318671	143.8	-0.3601142	143.8	-0.3088484	143.8	-0.2848972	143.8	-0.2999277	143.8	-0.2680455	143.8	-0.2636309	143.8	-0.3009199
144	-0.3507157	144	-0.3942969	144	-0.3281904	144	-0.3519635	144	-0.3701206	144	-0.3305118	144	-0.3231902	144	-0.3130701	144	-0.3367672	144	-0.3532704	144	-0.3073695	144	-0.2855853	144	-0.3015674	144	-0.2724649	144	-0.2686712	144	-0.302867
144.2	-0.3543277	144.2	-0.3968446	144.2	-0.3248433	144.2	-0.3476877	144.2	-0.3647337	144.2	-0.3327481	144.2	-0.3270037	144.2	-0.3150964	144.2	-0.3327723	144.2	-0.3537382	144.2	-0.3076306	144.2	-0.2835606	144.2	-0.3008543	144.2	-0.2730765	144.2	-0.2641673	144.2	-0.3024887
144.4	-0.3553451	144.4	-0.3976166	144.4	-0.3274124	144.4	-0.350941	144.4	-0.36962	144.4	-0.3331388	144.4	-0.3205757	144.4	-0.315908	144.4	-0.3328256	144.4	-0.3537731	144.4	-0.3070126	144.4	-0.2875212	144.4	-0.3048021	144.4	-0.2738259	144.4	-0.2631054	144.4	-0.3001438
144.6	-0.3521485	144.6	-0.3983142	144.6	-0.3286641	144.6	-0.3479427	144.6	-0.3691247	144.6	-0.3317017	144.6	-0.3227868	144.6	-0.3154399	144.6	-0.3339176	144.6	-0.3575132	144.6	-0.3067231	144.6	-0.2835423	144.6	-0.2983949	144.6	-0.2713026	144.6	-0.2605297	144.6	-0.2995787
144.8	-0.3470866	144.8	-0.4020036	144.8	-0.3280708	144.8	-0.3454436	144.8	-0.3687158	144.8	-0.334243	144.8	-0.3213737	144.8	-0.3137346	144.8	-0.3357935	144.8	-0.3517666	144.8	-0.3074732	144.8	-0.2792288	144.8	-0.3016717	144.8	-0.264641	144.8	-0.2637604	144.8	-0.2994231
145	-0.3495588	145	-0.3900104	145	-0.3239883	145	-0.354279	145	-0.3679631	145	-0.3331619	145	-0.3238422	145	-0.3121881	145	-0.3322001	145	-0.3545093	145	-0.3103384	145	-0.2807525	145	-0.3013482	145	-0.2704527	145	-0.2609416	145	-0.304314
145.2	-0.3463717	145.2	-0.3894998	145.2	-0.3220861	145.2	-0.3493732	145.2	-0.3644371	145.2	-0.3287307	145.2	-0.3220161	145.2	-0.316729	145.2	-0.3322335	145.2	-0.355014	145.2	-0.3062569	145.2	-0.2826368	145.2	-0.3039445	145.2	-0.268355	145.2	-0.2619564	145.2	-0.2990771
145.4	-0.3510346	145.4	-0.3941261	145.4	-0.3222424	145.4	-0.3491952	145.4	-0.3662759	145.4	-0.3321764	145.4	-0.3210134	145.4	-0.3180554	145.4	-0.3297761	145.4	-0.3547068	145.4	-0.307416	145.4	-0.2823623	145.4	-0.2997585	145.4	-0.2699001	145.4	-0.2638074	145.4	-0.3010823
145.6	-0.3501543	145.6	-0.3918923	145.6	-0.323976	145.6	-0.3493079	145.6	-0.3646561	145.6	-0.3320016	145.6	-0.3270283	145.6	-0.3185222	145.6	-0.3301179	145.6	-0.351628	145.6	-0.3024553	145.6	-0.2835366	145.6	-0.2993814	145.6	-0.2690011	145.6	-0.2634866	145.6	-0.2974882
145.8	-0.3551771	145.8	-0.3952135	145.8	-0.3256133	145.8	-0.3464136	145.8	-0.3672217	145.8	-0.3342764	145.8	-0.3244942	145.8	-0.3130017	145.8	-0.3318048	145.8	-0.3540319	145.8	-0.3006785	145.8	-0.2805301	145.8	-0.2997008	145.8	-0.2690936	145.8	-0.2599017	145.8	-0.3013227
146	-0.346275	146	-0.3942919	146	-0.322106	146	-0.3519495	146	-0.3684926	146	-0.324105	146	-0.3194881	146	-0.316009	146	-0.329305	146	-0.3556497	146	-0.3065901	146	-0.2846651	146	-0.2982221	146	-0.2678289	146	-0.2606888	146	-0.3013267
146.2	-0.35412	146.2	-0.3918024	146.2	-0.3279362	146.2	-0.3479474	146.2	-0.3655929	146.2	-0.3315386	146.2	-0.3197293	146.2	-0.3116604	146.2	-0.3318256	146.2	-0.352269	146.2	-0.3018393	146.2	-0.2790055	146.2	-0.2990835	146.2	-0.2667516	146.2	-0.2554007	146.2	-0.2994815
146.4	-0.351965	146.4	-0.3898927	146.4	-0.3204489	146.4	-0.3488353	146.4	-0.3603976	146.4	-0.3285327	146.4	-0.3231532	146.4	-0.3127262	146.4	-0.3307374	146.4	-0.3541992	146.4	-0.3052851	146.4	-0.2804376	146.4	-0.2999635	146.4	-0.266237	146.4	-0.2618154	146.4	-0.299919
146.6	-0.3460309	146.6	-0.3914227	146.6	-0.3228155	146.6	-0.3516582	146.6	-0.3671483	146.6	-0.3302327	146.6	-0.3213937	146.6	-0.3142008	146.6	-0.3325203	146.6	-0.3541298	146.6	-0.3074208	146.6	-0.2787482	146.6	-0.2996896	146.6	-0.265138	146.6	-0.2622876	146.6	-0.3018953
146.8	-0.3482336	146.8	-0.3917748	146.8	-0.3228545	146.8	-0.3463554	146.8	-0.3645016	146.8	-0.3291528	146.8	-0.3222701	146.8	-0.3114926	146.8	-0.3292495	146.8	-0.3517075	146.8	-0.3052723	146.8	-0.2814486	146.8	-0.3001772	146.8	-0.2671408	146.8	-0.2566341	146.8	-0.2977293
147	-0.3493657	147	-0.3882732	147	-0.317723	147	-0.3440693	147	-0.3664	147	-0.3293931	147	-0.3216449	147	-0.3066767	147	-0.3333538	147	-0.3530274	147	-0.3024203	147	-0.281572	147	-0.2959087	147	-0.2666631	147	-0.2609168	147	-0.2922453
147.2	-0.3482854	147.2	-0.3905561	147.2	-0.3237258	147.2	-0.3492922	147.2	-0.3640942	147.2	-0.3276324	147.2	-0.3203067	147.2	-0.3125806	147.2	-0.3290558	147.2	-0.3539219	147.2	-0.3010478	147.2	-0.2779417	147.2	-0.2984226	147.2	-0.2649067	147.2	-0.2597758	147.2	-0.296737
147.4	-0.346966	147.4	-0.3874064	147.4	-0.3214591	147.4	-0.3465668	147.4	-0.3617878	147.4	-0.330787	147.4	-0.3223147	147.4	-0.3057538	147.4	-0.3287257	147.4	-0.3542762	147.4	-0.3011596	147.4	-0.27858	147.4	-0.2949959	147.4	-0.2643581	147.4	-0.2595347	147.4	-0.2953966
147.6	-0.3498076	147.6	-0.3889208	147.6	-0.3189117	147.6	-0.3520415	147.6	-0.3633875	147.6	-0.3258	147.6	-0.3181455	147.6	-0.3103356	147.6	-0.3299432	147.6	-0.3492127	147.6	-0.30463	147.6	-0.2782029	147.6	-0.3008527	147.6	-0.2647142	147.6	-0.2590327	147.6	-0.2956187
147.8	-0.3490748	147.8	-0.3868112	147.8	-0.3222863	147.8	-0.3464064	147.8	-0.3617616	147.8	-0.3260009	147.8	-0.3196763	147.8	-0.31355	147.8	-0.3270714	147.8	-0.3465372	147.8	-0.3029837	147.8	-0.2800533	147.8	-0.297032	147.8	-0.2639692	147.8	-0.2622168	147.8	-0.3019751
148	-0.3434097	148	-0.3868831	148	-0.3190892	148	-0.3440472	148	-0.365444	148	-0.330256	148	-0.3185718	148	-0.3067842	148	-0.3308859	148	-0.3536598	148	-0.302417	148	-0.2811459	148	-0.2940367	148	-0.2611035	148	-0.257035	148	-0.2959058
148.2	-0.3438287	148.2	-0.3912515	148.2	-0.3255481	148.2	-0.341394	148.2	-0.3591367	148.2	-0.324964	148.2	-0.3155989	148.2	-0.3134106	148.2	-0.3300594	148.2	-0.3486959	148.2	-0.2991004	148.2	-0.2761967	148.2	-0.2943978	148.2	-0.2649438	148.2	-0.2584942	148.2	-0.2940005
148.4	-0.3478712	148.4	-0.388922	148.4	-0.3163995	148.4	-0.343375	148.4	-0.364387	148.4	-0.3235157	148.4	-0.3185698	148.4	-0.3109372	148.4	-0.32573	148.4	-0.3485253	148.4	-0.3027162	148.4	-0.2776224	148.4	-0.2957169	148.4	-0.2654566	148.4	-0.2503617	148.4	-0.2936957
148.6	-0.3489861	148.6	-0.3895496	148.6	-0.3185786	148.6	-0.3476114	148.6	-0.3632334	148.6	-0.3282135	148.6	-0.3191101	148.6	-0.3112351	148.6	-0.3281764	148.6	-0.3460558	148.6	-0.3000375	148.6	-0.2816587	148.6	-0.2955001	148.6	-0.262078	148.6	-0.2552279	148.6	-0.2935335
148.8	-0.3463689	148.8	-0.388107	148.8	-0.3188128	148.8	-0.344445	148.8	-0.3616897	148.8	-0.323607	148.8	-0.3111914	148.8	-0.3061533	148.8	-0.3246468	148.8	-0.3533347	148.8	-0.3025142	148.8	-0.2770214	148.8	-0.2935873	148.8	-0.2646356	148.8	-0.2535812	148.8	-0.2941968
149	-0.339696	149	-0.3866229	149	-0.3201999	149	-0.3428012	149	-0.3651566	149	-0.3269641	149	-0.3193854	149	-0.3113879	149	-0.3277528	149	-0.3519737	149	-0.3012179	149	-0.2736321	149	-0.2939159	149	-0.2594434	149	-0.261289	149	-0.2945797
149.2	-0.3432364	149.2	-0.3828236	149.2	-0.3199943	149.2	-0.3451221	149.2	-0.3585291	149.2	-0.3271343	149.2	-0.3127138	149.2	-0.3075226	149.2	-0.3246337	149.2	-0.3493174	149.2	-0.2986975	149.2	-0.2803458	149.2	-0.2938688	149.2	-0.2593271	149.2	-0.2537175	149.2	-0.2954615
149.4	-0.3407882	149.4	-0.3899454	149.4	-0.321052	149.4	-0.33899	149.4	-0.3650234	149.4	-0.3296798	149.4	-0.3149169	149.4	-0.3111812	149.4	-0.3246604	149.4	-0.3476278	149.4	-0.3005752	149.4	-0.2755958	149.4	-0.2960733	149.4	-0.2605773	149.4	-0.2560374	149.4	-0.2948321
149.6	-0.3415629	149.6	-0.3882637	149.6	-0.3196279	149.6	-0.3446578	149.6	-0.3624824	149.6	-0.323164	149.6	-0.3148411	149.6	-0.3086675	149.6	-0.327069	149.6	-0.3484167	149.6	-0.3037041	149.6	-0.2756365	149.6	-0.2965992	149.6	-0.2626454	149.6	-0.2588453	149.6	-0.2913026
149.8	-0.3454838	149.8	-0.3853943	149.8	-0.3199804	149.8	-0.3444089	149.8	-0.3586993	149.8	-0.3259021	149.8	-0.3131295	149.8	-0.3086381	149.8	-0.3235214	149.8	-0.3485233	149.8	-0.2999314	149.8	-0.280241	149.8	-0.2954168	149.8	-0.2602418	149.8	-0.2550279	149.8	-0.2924207
150	-0.3644879	150	-0.4080067	150	-0.341958	150	-0.3586037	150	-0.3788722	150	-0.345323	150	-0.3360985	150	-0.3030217	150	-0.3263499	150	-0.3482378	150	-0.2967538	150	-0.277319	150	-0.2884799	150	-0.2644811	150	-0.2511589	150	-0.2898233
150.2	-0.3557747	150.2	-0.4008084	150.2	-0.3359266	150.2	-0.3547191	150.2	-0.3752183	150.2	-0.3402582	150.2	-0.3223966	150.2	-0.3038777	150.2	-0.3254158	150.2	-0.345358	150.2	-0.2973419	150.2	-0.27594	150.2	-0.2922513	150.2	-0.2607528	150.2	-0.2530128	150.2	-0.2927923
150.4	-0.3505062	150.4	-0.3912272	150.4	-0.3275077	150.4	-0.3473316	150.4	-0.3670388	150.4	-0.3324153	150.4	-0.3193433	150.4	-0.3019289	150.4	-0.3175075	150.4	-0.3420684	150.4	-0.2987475	150.4	-0.269576	150.4	-0.291824	150.4	-0.2562852	150.4	-0.2577932	150.4	-0.2933741
150.6	-0.3373333	150.6	-0.3827535	150.6	-0.319539	150.6	-0.3394273	150.6	-0.3573873	150.6	-0.3173467	150.6	-0.3055703	150.6	-0.2948971	150.6	-0.324726	150.6	-0.3389101	150.6	-0.2937463	150.6	-0.2736175	150.6	-0.292414	150.6	-0.2609225	150.6	-0.2528694	150.6	-0.2919603
150.8	-0.328694	150.8	-0.3724496	150.8	-0.3097719	150.8	-0.3302596	150.8	-0.3502015	150.8	-0.3126778	150.8	-0.2998073	150.8	-0.2984187	150.8	-0.32325	150.8	-0.3463815	150.8	-0.2940179	150.8	-0.271021	150.8	-0.2896036	150.8	-0.2618459	150.8	-0.2550698	150.8	-0.2939155
151	-0.3232066	151	-0.3646809	151	-0.2988264	151	-0.3207922	151	-0.3391182	151	-0.3068062	151	-0.2929249	151	-0.3002198	151	-0.3233774	151	-0.3432308	151	-0.2961356	151	-0.2740398	151	-0.2899601	151	-0.2584479	151	-0.2526251	151	-0.2907384
151.2	-0.3111583	151.2	-0.3529834	151.2	-0.2901076	151.2	-0.3146831	151.2	-0.3355677	151.2	-0.2924164	151.2	-0.2808847	151.2	-0.2994858	151.2	-0.3219315	151.2	-0.3414042	151.2	-0.2942044	151.2	-0.2754572	151.2	-0.2893836	151.2	-0.2532617	151.2	-0.2540738	151.2	-0.2929613
151.4	-0.3049226	151.4	-0.3502791	151.4	-0.2833	151.4	-0.3045591	151.4	-0.3245492	151.4	-0.2819495	151.4	-0.2729126	151.4	-0.2943488	151.4	-0.3175598	151.4	-0.338779	151.4	-0.2932758	151.4	-0.2726492	151.4	-0.2926887	151.4	-0.2614	151.4	-0.2499042	151.4	-0.2868547
151.6	-0.294901	151.6	-0.3389589	151.6	-0.2751702	151.6	-0.2933664	151.6	-0.3173774	151.6	-0.2837303	151.6	-0.2605813	151.6	-0.2986858	151.6	-0.3238526	151.6	-0.3410078	151.6	-0.2900344	151.6	-0.2721532	151.6	-0.2898974	151.6	-0.2542591	151.6	-0.253274	151.6	-0.288195
151.8	-0.2831311	151.8	-0.3272876	151.8	-0.2655921	151.8	-0.2888135	151.8	-0.3063431	151.8	-0.2697017	151.8	-0.251317	151.8	-0.2995115	151.8	-0.3212534	151.8	-0.3414032	151.8	-0.2963668	151.8	-0.2738381	151.8	-0.2923623	151.8	-0.2549859	151.8	-0.2504902	151.8	-0.2912425
152	-0.2757685	152	-0.3221661	152	-0.2564417	152	-0.2758437	152	-0.2982945	152	-0.2626334	152	-0.2488733	152	-0.2963064	152	-0.3200192	152	-0.3398566	152	-0.2946207	152	-0.2662838	152	-0.2869458	152	-0.2583131	152	-0.246431	152	-0.2929143
152.2	-0.2660839	152.2	-0.312448	152.2	-0.2506199	152.2	-0.2687131	152.2	-0.2914409	152.2	-0.2511939	152.2	-0.2425098	152.2	-0.2989778	152.2	-0.3218676	152.2	-0.3467142	152.2	-0.2962161	152.2	-0.2666904	152.2	-0.2908821	152.2	-0.255264	152.2	-0.2504146	152.2	-0.2906772
152.4	-0.2625712	152.4	-0.3032294	152.4	-0.2375668	152.4	-0.2596391	152.4	-0.2822538	152.4	-0.2448881	152.4	-0.2301576	152.4	-0.2944179	152.4	-0.3196426	152.4	-0.3405193	152.4	-0.2939028	152.4	-0.2681138	152.4	-0.2912723	152.4	-0.2586783	152.4	-0.2472027	152.4	-0.2878337
152.6	-0.2483445	152.6	-0.2938242	152.6	-0.2264559	152.6	-0.2529516	152.6	-0.2748703	152.6	-0.2379061	152.6	-0.2162243	152.6	-0.2990736	152.6	-0.3227306	152.6	-0.3410122	152.6	-0.2966401	152.6	-0.2713604	152.6	-0.2901171	152.6	-0.2533263	152.6	-0.249109	152.6	-0.2863785
152.8	-0.2420711	152.8	-0.283002	152.8	-0.2189876	152.8	-0.2411679	152.8	-0.2644942	152.8	-0.2226612	152.8	-0.2103259	152.8	-0.2961748	152.8	-0.3216021	152.8	-0.3409291	152.8	-0.2947995	152.8	-0.2656201	152.8	-0.2876626	152.8	-0.2554574	152.8	-0.2484361	152.8	-0.2907938
153	-0.2301781	153	-0.2772021	153	-0.2153035	153	-0.238793	153	-0.2533502	153	-0.2191993	153	-0.1995343	153	-0.2987354	153	-0.3209694	153	-0.3362754	153	-0.2925541	153	-0.2702623	153	-0.2845764	153	-0.2610676	153	-0.2504642	153	-0.2914862
153.2	-0.2273867	153.2	-0.2661546	153.2	-0.2077668	153.2	-0.224944	153.2	-0.2514666	153.2	-0.2133201	153.2	-0.1945003	153.2	-0.2973307	153.2	-0.3187344	153.2	-0.3429152	153.2	-0.2935385	153.2	-0.2691314	153.2	-0.2861633	153.2	-0.2561105	153.2	-0.2502035	153.2	-0.290751
153.4	-0.2162833	153.4	-0.2593173	153.4	-0.1942174	153.4	-0.2186852	153.4	-0.2383915	153.4	-0.2016746	153.4	-0.187344	153.4	-0.2934454	153.4	-0.3213578	153.4	-0.3383062	153.4	-0.2891002	153.4	-0.2697851	153.4	-0.2869599	153.4	-0.2552991	153.4	-0.2491399	153.4	-0.2910855
153.6	-0.2079516	153.6	-0.2497963	153.6	-0.1897554	153.6	-0.2038131	153.6	-0.2308667	153.6	-0.1920933	153.6	-0.1746412	153.6	-0.2945894	153.6	-0.3246753	153.6	-0.3397539	153.6	-0.2889029	153.6	-0.2685046	153.6	-0.2859878	153.6	-0.253459	153.6	-0.2497358	153.6	-0.285451
153.8	-0.2020208	153.8	-0.2391803	153.8	-0.1727571	153.8	-0.2059308	153.8	-0.2290199	153.8	-0.1831694	153.8	-0.1684375	153.8	-0.2909945	153.8	-0.3161618	153.8	-0.3385695	153.8	-0.2919184	153.8	-0.27165	153.8	-0.2860314	153.8	-0.2595508	153.8	-0.2493863	153.8	-0.2875377
154	-0.1892716	154	-0.2334992	154	-0.1653362	154	-0.1939223	154	-0.2116992	154	-0.1797931	154	-0.1570174	154	-0.293133	154	-0.3205406	154	-0.3357725	154	-0.2900299	154	-0.2704845	154	-0.2858712	154	-0.2539859	154	-0.2458011	154	-0.2853977
154.2	-0.1827798	154.2	-0.2232212	154.2	-0.1634485	154.2	-0.1795339	154.2	-0.207936	154.2	-0.1705779	154.2	-0.1497846	154.2	-0.2917444	154.2	-0.3176871	154.2	-0.3390844	154.2	-0.2915626	154.2	-0.2658214	154.2	-0.2872911	154.2	-0.2552168	154.2	-0.244133	154.2	-0.2858743
154.4	-0.1687269	154.4	-0.2125455	154.4	-0.151523	154.4	-0.1734966	154.4	-0.1950088	154.4	-0.1617791	154.4	-0.140279	154.4	-0.2931372	154.4	-0.3173538	154.4	-0.3368883	154.4	-0.2886962	154.4	-0.2704246	154.4	-0.2855103	154.4	-0.2570166	154.4	-0.2470987	154.4	-0.2829937
154.6	-0.1643603	154.6	-0.2075884	154.6	-0.1432235	154.6	-0.1615234	154.6	-0.1916972	154.6	-0.1493001	154.6	-0.1291937	154.6	-0.2907274	154.6	-0.3222266	154.6	-0.3374578	154.6	-0.2895713	154.6	-0.2672492	154.6	-0.2838774	154.6	-0.2553267	154.6	-0.2482137	154.6	-0.28631
154.8	-0.1546934	154.8	-0.202877	154.8	-0.1398266	154.8	-0.1583123	154.8	-0.1805352	154.8	-0.1436149	154.8	-0.1262347	154.8	-0.2900703	154.8	-0.3182435	154.8	-0.3378069	154.8	-0.2869436	154.8	-0.2678651	154.8	-0.286375	154.8	-0.2557638	154.8	-0.2462593	154.8	-0.2863247
155	-0.1481068	155	-0.1907983	155	-0.1264604	155	-0.1463401	155	-0.1744162	155	-0.1333511	155	-0.1168743	155	-0.299434	155	-0.3213154	155	-0.335742	155	-0.292696	155	-0.2658421	155	-0.2848447	155	-0.2503421	155	-0.2417411	155	-0.2918164
155.2	-0.1372795	155.2	-0.179244	155.2	-0.1149933	155.2	-0.1412208	155.2	-0.1660461	155.2	-0.1263733	155.2	-0.1095375	155.2	-0.2888238	155.2	-0.312865	155.2	-0.3344992	155.2	-0.2896896	155.2	-0.2688986	155.2	-0.2868673	155.2	-0.2502661	155.2	-0.2444952	155.2	-0.2903901
155.4	-0.1318303	155.4	-0.1699492	155.4	-0.1109121	155.4	-0.1305537	155.4	-0.1570171	155.4	-0.1220497	155.4	-0.09952139	155.4	-0.2943747	155.4	-0.3168142	155.4	-0.3391486	155.4	-0.2910072	155.4	-0.2658834	155.4	-0.2846654	155.4	-0.2515112	155.4	-0.2442864	155.4	-0.2824224
155.6	-0.1191117	155.6	-0.1619446	155.6	-0.09969867	155.6	-0.1260579	155.6	-0.1485082	155.6	-0.1103277	155.6	-0.0904482	155.6	-0.2920836	155.6	-0.3179998	155.6	-0.3395627	155.6	-0.2865199	155.6	-0.2692059	155.6	-0.282461	155.6	-0.2517971	155.6	-0.2431885	155.6	-0.2849461
155.8	-0.1121971	155.8	-0.1589725	155.8	-0.09110332	155.8	-0.1160188	155.8	-0.1436258	155.8	-0.1045343	155.8	-0.08191894	155.8	-0.2950198	155.8	-0.3205583	155.8	-0.3337098	155.8	-0.2870141	155.8	-0.2656787	155.8	-0.2861263	155.8	-0.255806	155.8	-0.2473738	155.8	-0.2843289
156.02	-0.1065833	156.02	-0.151444	156.02	-0.08450267	156.02	-0.1031944	156.02	-0.1305681	156.02	-0.0971294	156.02	-0.07479265	156.02	-0.2896972	156	-0.3174302	156	-0.3370322	156	-0.2917491	156	-0.2691243	156	-0.2841897	156	-0.2499078	156	-0.238312	156	-0.2846704
156.2	-0.09687252	156.2	-0.1397054	156.2	-0.07871947	156.2	-0.1024066	156.2	-0.1228445	156.2	-0.08311167	156.2	-0.06802945	156.2	-0.2901821	156.2	-0.3188505	156.2	-0.3402142	156.2	-0.2927546	156.2	-0.2669852	156.2	-0.2869406	156.2	-0.2521429	156.2	-0.245375	156.2	-0.2843367
156.4	-0.09248683	156.4	-0.128921	156.4	-0.06725795	156.4	-0.08767786	156.4	-0.1181644	156.4	-0.08116568	156.4	-0.05801896	156.4	-0.2924564	156.4	-0.3112448	156.4	-0.3346677	156.4	-0.2888351	156.4	-0.2642647	156.4	-0.2884583	156.4	-0.2517889	156.4	-0.2466051	156.4	-0.2848742
156.6	-0.0806179	156.6	-0.1243509	156.6	-0.06498757	156.6	-0.08018208	156.6	-0.1037705	156.6	-0.07054997	156.6	-0.04715578	156.6	-0.2922593	156.6	-0.3186243	156.6	-0.3319724	156.6	-0.2843603	156.6	-0.2630924	156.6	-0.2848544	156.6	-0.2495091	156.6	-0.2436958	156.6	-0.2854763
156.8	-0.07243112	156.8	-0.1171424	156.8	-0.05375189	156.8	-0.07879313	156.8	-0.09945662	156.8	-0.0617763	156.8	-0.03967797	156.8	-0.2894051	156.8	-0.3167301	156.8	-0.334545	156.8	-0.2861644	156.8	-0.26173	156.8	-0.2832858	156.8	-0.2549138	156.8	-0.2437167	156.8	-0.2794063
157	-0.06207593	157	-0.1117053	157	-0.04491864	157	-0.06480165	157	-0.09490636	157	-0.05383074	157	-0.03118536	157	-0.2871922	157	-0.3118325	157	-0.3337951	157	-0.2881244	157	-0.2614567	157	-0.2794633	157	-0.2506817	157	-0.2422814	157	-0.2817562
157.2	-0.05788496	157.2	-0.09743199	157.2	-0.03625515	157.2	-0.06158109	157.2	-0.08727804	157.2	-0.04992775	157.2	-0.02848861	157.2	-0.2898816	157.2	-0.3130251	157.2	-0.3325442	157.2	-0.2873608	157.2	-0.2600388	157.2	-0.2802028	157.2	-0.2489057	157.2	-0.2450942	157.2	-0.2815112
157.4	-0.04742429	157.4	-0.08990682	157.4	-0.03185762	157.4	-0.05448214	157.4	-0.07637119	157.4	-0.03661526	157.4	-0.01688081	157.4	-0.292003	157.4	-0.3132421	157.4	-0.3350684	157.4	-0.2855005	157.4	-0.2628924	157.4	-0.2815356	157.4	-0.2476475	157.4	-0.2445806	157.4	-0.2845719
157.6	-0.04011046	157.6	-0.08319077	157.6	-0.02367592	157.6	-0.05227222	157.6	-0.06985587	157.6	-0.03632824	157.6	-0.00615944	157.6	-0.2866436	157.6	-0.3152768	157.6	-0.3326664	157.6	-0.2888879	157.6	-0.2627517	157.6	-0.2857025	157.6	-0.2499041	157.6	-0.2465494	157.6	-0.2788081
157.8	-0.03276581	157.8	-0.07750832	157.8	-0.01330093	157.8	-0.03748604	157.8	-0.06371381	157.8	-0.02223136	157.8	0.0021605	157.8	-0.2913125	157.8	-0.3126027	157.8	-0.3368775	157.8	-0.2865474	157.8	-0.2635374	157.8	-0.2832345	157.8	-0.2496976	157.8	-0.2455865	157.8	-0.2813968
158	-0.02446246	158	-0.06563547	158	-0.00446512	158	-0.02753818	158	-0.05518364	158	-0.01872454	158	0.00379004	158	-0.2847991	158	-0.317518	158	-0.3386374	158	-0.2848568	158	-0.262411	158	-0.2815457	158	-0.2493614	158	-0.2424137	158	-0.2845151
158.2	-0.01481256	158.2	-0.05788693	158.2	0.00203508	158.2	-0.0211298	158.2	-0.04821764	158.2	-0.0091412	158.2	0.0091964	158.2	-0.2837897	158.2	-0.3158112	158.2	-0.3374429	158.2	-0.2850068	158.2	-0.2595959	158.2	-0.2798491	158.2	-0.2480207	158.2	-0.2423509	158.2	-0.2798184
158.4	-0.01317128	158.4	-0.0587317	158.4	0.00550476	158.4	-0.01259878	158.4	-0.04432502	158.4	-0.00345405	158.4	0.01492708	158.4	-0.2812947	158.4	-0.311502	158.4	-0.3320927	158.4	-0.2796433	158.4	-0.2626564	158.4	-0.2796854	158.4	-0.2449027	158.4	-0.2405712	158.4	-0.2797306
158.6	-0.00219061	158.6	-0.04509468	158.6	0.01531799	158.6	-0.005143	158.6	-0.03508452	158.6	0.0048179	158.6	0.02796086	158.6	-0.2924479	158.6	-0.3121219	158.6	-0.3315179	158.6	-0.281012	158.6	-0.2619545	158.6	-0.2776526	158.6	-0.2481706	158.6	-0.2376792	158.6	-0.2853753
158.8	0.00335063	158.8	-0.03897279	158.8	0.02294105	158.8	-0.00000478	158.8	-0.02669986	158.8	0.00918503	158.8	0.03871164	158.8	-0.2845416	158.8	-0.3145211	158.8	-0.3327004	158.8	-0.2866109	158.8	-0.261516	158.8	-0.2816281	158.8	-0.248971	158.8	-0.2369712	158.8	-0.2797571
159	0.01516339	159	-0.03010759	159	0.02807114	159	0.0056948	159	-0.02056899	159	0.01837882	159	0.04290615	159	-0.2897409	159	-0.311105	159	-0.3341057	159	-0.2825264	159	-0.2621499	159	-0.2758694	159	-0.2474353	159	-0.2373811	159	-0.2820187
159.2	0.01460742	159.2	-0.02389212	159.2	0.03166297	159.2	0.01662585	159.2	-0.01418334	159.2	0.02873674	159.2	0.04854844	159.2	-0.2838542	159.2	-0.3116549	159.2	-0.3342941	159.2	-0.2805983	159.2	-0.2596238	159.2	-0.277285	159.2	-0.2414524	159.2	-0.2420095	159.2	-0.2811618
159.42	0.02801201	159.42	-0.01212548	159.42	0.04436993	159.42	0.02025694	159.42	-0.00547436	159.42	0.03002311	159.42	0.05678158	159.42	-0.286812	159.4	-0.3120221	159.4	-0.3323465	159.4	-0.2847854	159.4	-0.2587817	159.4	-0.2778052	159.4	-0.246443	159.4	-0.2389795	159.4	-0.2779198
159.6	0.03688702	159.6	-0.01288718	159.6	0.05018623	159.6	0.03026741	159.6	0.00088607	159.6	0.04187923	159.6	0.06174623	159.6	-0.2838185	159.6	-0.3112947	159.6	-0.3323652	159.6	-0.2781786	159.6	-0.260081	159.6	-0.2751446	159.6	-0.2449882	159.6	-0.2412204	159.6	-0.2773996
159.8	0.04426374	159.8	-0.00309012	159.8	0.05968567	159.8	0.04206025	159.8	0.01221132	159.8	0.04662251	159.8	0.07165381	159.8	-0.2850921	159.8	-0.3095016	159.8	-0.3293168	159.8	-0.283815	159.8	-0.2599712	159.8	-0.2775427	159.8	-0.2449187	159.8	-0.2368247	159.8	-0.2760863
160	0.04643951	160	0.00163472	160	0.07108261	160	0.04061969	160	0.01402591	160	0.05265423	160	0.07845543	160	-0.2903002	160	-0.3082715	160	-0.3334559	160	-0.2813351	160	-0.2629873	160	-0.2769894	160	-0.2467073	160	-0.2365642	160	-0.283282
160.2	0.05346993	160.2	0.01470918	160.2	0.07279316	160.2	0.04854162	160.2	0.02136532	160.2	0.06252777	160.2	0.0888402	160.2	-0.2880633	160.2	-0.3157677	160.2	-0.3298793	160.2	-0.2783016	160.2	-0.2619837	160.2	-0.2714021	160.2	-0.2438682	160.2	-0.2365308	160.2	-0.280545
160.4	0.06237975	160.4	0.01946234	160.4	0.07496193	160.4	0.0587463	160.4	0.03059734	160.4	0.0705204	160.4	0.09344918	160.4	-0.2868009	160.4	-0.3126027	160.4	-0.3352449	160.4	-0.2826697	160.4	-0.2588636	160.4	-0.2793923	160.4	-0.2490484	160.4	-0.238309	160.4	-0.2759349
160.6	0.07643627	160.6	0.02675368	160.6	0.0859386	160.6	0.06622493	160.6	0.03405077	160.6	0.07464866	160.6	0.09989674	160.6	-0.2871503	160.6	-0.3145409	160.6	-0.3310527	160.6	-0.2827224	160.6	-0.2599678	160.6	-0.2709542	160.6	-0.2459328	160.6	-0.234385	160.6	-0.2814476
160.8	0.08179538	160.8	0.02723943	160.8	0.09156687	160.8	0.06892105	160.8	0.03968702	160.8	0.08309003	160.8	0.1042597	160.8	-0.28345	160.8	-0.3102607	160.8	-0.330426	160.8	-0.2841482	160.8	-0.263568	160.8	-0.281494	160.8	-0.2456422	160.8	-0.2393134	160.8	-0.2811674
161	0.08308648	161	0.03911367	161	0.1027314	161	0.07242962	161	0.0501799	161	0.0840981	161	0.1151583	161	-0.2867831	161	-0.3080972	161	-0.3262122	161	-0.2808305	161	-0.2556621	161	-0.2747422	161	-0.2431815	161	-0.2439184	161	-0.2809689
161.2	0.08908948	161.2	0.04929059	161.2	0.107924	161.2	0.08727405	161.2	0.05715783	161.2	0.09257191	161.2	0.1210469	161.2	-0.2801322	161.2	-0.305686	161.2	-0.3276146	161.2	-0.280248	161.2	-0.2591003	161.2	-0.2772108	161.2	-0.2430989	161.2	-0.2361526	161.2	-0.2781199
161.4	0.0995009	161.4	0.05123111	161.4	0.1136432	161.4	0.08882114	161.4	0.06597804	161.4	0.09909363	161.4	0.1278724	161.4	-0.2855892	161.4	-0.3082159	161.4	-0.3276561	161.4	-0.2787375	161.4	-0.2570251	161.4	-0.2712763	161.4	-0.2390203	161.4	-0.2395007	161.4	-0.2835907
161.6	0.1086612	161.6	0.06000511	161.6	0.1222303	161.6	0.09619179	161.6	0.06802606	161.6	0.10664	161.6	0.1344693	161.6	-0.2807503	161.6	-0.3063259	161.6	-0.3234577	161.6	-0.2767222	161.6	-0.2560594	161.6	-0.2743893	161.6	-0.241592	161.6	-0.2344521	161.6	-0.278905
161.81	0.1062238	161.81	0.06915034	161.81	0.1268316	161.81	0.1008249	161.81	0.08256134	161.81	0.1128806	161.81	0.1398989	161.81	-0.2838109	161.8	-0.3105829	161.8	-0.3267875	161.8	-0.2830122	161.8	-0.2583155	161.8	-0.2709537	161.8	-0.2411535	161.8	-0.2380462	161.8	-0.2832144
162	0.1122675	162	0.07247379	162	0.1353107	162	0.1056156	162	0.08336852	162	0.1237909	162	0.1495001	162	-0.2813444	162	-0.3084722	162	-0.3272699	162	-0.2815303	162	-0.2577201	162	-0.2751813	162	-0.2437558	162	-0.2366514	162	-0.274057
162.2	0.1222053	162.2	0.08091195	162.2	0.1391118	162.2	0.1185986	162.2	0.08934996	162.2	0.1293224	162.2	0.1564736	162.2	-0.2839018	162.2	-0.3088771	162.2	-0.3254772	162.2	-0.2779885	162.2	-0.2565082	162.2	-0.2712214	162.2	-0.2397293	162.2	-0.2364842	162.2	-0.2784983
162.4	0.1318357	162.4	0.09237551	162.4	0.1474006	162.4	0.1200728	162.4	0.09406719	162.4	0.1391393	162.4	0.1613322	162.4	-0.2779934	162.4	-0.30693	162.4	-0.32882	162.4	-0.2767553	162.4	-0.2546859	162.4	-0.2773195	162.4	-0.2440874	162.4	-0.2342699	162.4	-0.2810768
162.6	0.1346132	162.6	0.09420939	162.6	0.1562255	162.6	0.1285974	162.6	0.1004263	162.6	0.1393333	162.6	0.1657794	162.6	-0.2839496	162.6	-0.3087707	162.6	-0.3281988	162.6	-0.2774917	162.6	-0.2654359	162.6	-0.2764353	162.6	-0.2469699	162.6	-0.2318896	162.6	-0.2733428
162.8	0.1396261	162.8	0.09550462	162.8	0.1589902	162.8	0.132262	162.8	0.1072274	162.8	0.1424046	162.8	0.1710395	162.8	-0.2791456	162.8	-0.3078368	162.8	-0.3248147	162.8	-0.2803151	162.8	-0.2530519	162.8	-0.2737772	162.8	-0.2413164	162.8	-0.2345095	162.8	-0.2810912
163	0.1506856	163	0.1050931	163	0.1615333	163	0.1432982	163	0.1177411	163	0.1521572	163	0.1737993	163	-0.2787234	163	-0.3057609	163	-0.3285953	163	-0.2792487	163	-0.2569885	163	-0.2742552	163	-0.2439906	163	-0.2320392	163	-0.2773886
163.2	0.1543835	163.2	0.1140888	163.2	0.1741435	163.2	0.144415	163.2	0.1206269	163.2	0.1576495	163.2	0.1868897	163.2	-0.2819696	163.2	-0.3071213	163.2	-0.3312921	163.2	-0.2788308	163.2	-0.2497682	163.2	-0.273167	163.2	-0.2422784	163.2	-0.2326196	163.2	-0.27684
163.4	0.1567574	163.4	0.1186754	163.4	0.1790382	163.4	0.1553277	163.4	0.1249427	163.4	0.1639802	163.4	0.1881942	163.4	-0.2785259	163.4	-0.307577	163.4	-0.3235464	163.4	-0.2764045	163.4	-0.2630969	163.4	-0.2703208	163.4	-0.2371363	163.4	-0.2362221	163.4	-0.2751673
163.6	0.1645539	163.6	0.1277289	163.6	0.187918	163.6	0.1570124	163.6	0.1367655	163.6	0.1717014	163.6	0.1993274	163.6	-0.2760991	163.6	-0.3078304	163.6	-0.3264592	163.6	-0.2755868	163.6	-0.2569754	163.6	-0.2729737	163.6	-0.2392185	163.6	-0.2336474	163.6	-0.2770007
163.81	0.1774008	163.81	0.1348612	163.81	0.1937949	163.81	0.1661787	163.81	0.1347559	163.81	0.1754638	163.81	0.2098064	163.81	-0.2817074	163.8	-0.3068025	163.8	-0.3209961	163.8	-0.2800729	163.8	-0.2505327	163.8	-0.2723022	163.8	-0.2418657	163.8	-0.2348966	163.8	-0.2791893
164	0.1786464	164	0.1338139	164	0.1942794	164	0.1701534	164	0.1417288	164	0.1815341	164	0.2119515	164	-0.2799962	164	-0.3045367	164	-0.3272559	164	-0.2711895	164	-0.2530771	164	-0.2729447	164	-0.2392257	164	-0.233565	164	-0.2780039
164.2	0.1819245	164.2	0.1387315	164.2	0.2053075	164.2	0.1761447	164.2	0.1525287	164.2	0.1873812	164.2	0.2151707	164.2	-0.2815202	164.2	-0.3052798	164.2	-0.3236848	164.2	-0.2753933	164.2	-0.2572295	164.2	-0.2721678	164.2	-0.2386681	164.2	-0.2345723	164.2	-0.2772656
164.4	0.1927062	164.4	0.1514515	164.4	0.2071797	164.4	0.1762035	164.4	0.1523891	164.4	0.1954379	164.4	0.2199061	164.4	-0.2821943	164.4	-0.3059852	164.4	-0.3224813	164.4	-0.2791281	164.4	-0.2547161	164.4	-0.2690794	164.4	-0.2399251	164.4	-0.2348916	164.4	-0.2778523
164.6	0.2004324	164.6	0.1513296	164.6	0.2129702	164.6	0.1906389	164.6	0.1627589	164.6	0.1982139	164.6	0.2240854	164.6	-0.2781386	164.6	-0.2999608	164.6	-0.3240969	164.6	-0.2723632	164.6	-0.2559384	164.6	-0.2717502	164.6	-0.2385401	164.6	-0.2306835	164.6	-0.2698572
164.8	0.2013283	164.8	0.1565542	164.8	0.2211947	164.8	0.1913611	164.8	0.1659332	164.8	0.2067223	164.8	0.2327679	164.8	-0.2784515	164.8	-0.3033746	164.8	-0.3269281	164.8	-0.2781754	164.8	-0.2497937	164.8	-0.2700497	164.8	-0.2359186	164.8	-0.2324624	164.8	-0.2745428
165	0.2070962	165	0.164387	165	0.22643	165	0.205032	165	0.1714497	165	0.2104285	165	0.2367095	165	-0.2813407	165	-0.3077189	165	-0.3195793	165	-0.2754908	165	-0.2500817	165	-0.2728753	165	-0.2361782	165	-0.2358131	165	-0.2740907
165.2	0.2116479	165.2	0.1705831	165.2	0.229197	165.2	0.2011763	165.2	0.1755792	165.2	0.2202961	165.2	0.2441431	165.2	-0.2817094	165.2	-0.307773	165.2	-0.3258969	165.2	-0.2740982	165.2	-0.2542809	165.2	-0.2703887	165.2	-0.2388793	165.2	-0.2288163	165.2	-0.2787025
165.4	0.2202764	165.4	0.1774334	165.4	0.2368224	165.4	0.2127667	165.4	0.1809814	165.4	0.2182964	165.4	0.2494487	165.4	-0.2808824	165.4	-0.3029249	165.4	-0.3250156	165.4	-0.2709133	165.4	-0.2523167	165.4	-0.2683553	165.4	-0.2377437	165.4	-0.2312187	165.4	-0.2759621
165.6	0.2255319	165.6	0.187624	165.6	0.239424	165.6	0.2176983	165.6	0.1875017	165.6	0.2263355	165.6	0.2589132	165.6	-0.2742207	165.6	-0.3047103	165.6	-0.3238167	165.6	-0.2765927	165.6	-0.2523642	165.6	-0.2723494	165.6	-0.2366455	165.6	-0.2278486	165.6	-0.2697756
165.8	0.231398	165.8	0.1894011	165.8	0.2426508	165.8	0.2219222	165.8	0.1938171	165.8	0.2348158	165.8	0.2577454	165.8	-0.2768055	165.8	-0.3054835	165.8	-0.3228463	165.8	-0.2729271	165.8	-0.2492034	165.8	-0.2718134	165.8	-0.2370339	165.8	-0.2294019	165.8	-0.270672
166	0.2392902	166	0.1907914	166	0.2534407	166	0.2260575	166	0.1997863	166	0.2377051	166	0.2649948	166	-0.273765	166	-0.3050172	166	-0.3250261	166	-0.2723442	166	-0.2524264	166	-0.2714433	166	-0.2374573	166	-0.2266168	166	-0.2759807
166.2	0.2428894	166.2	0.1966892	166.2	0.2590375	166.2	0.2286904	166.2	0.2005141	166.2	0.240723	166.2	0.2686112	166.2	-0.2812046	166.2	-0.3060782	166.2	-0.3187754	166.2	-0.276909	166.2	-0.2501227	166.2	-0.2692056	166.2	-0.2364376	166.2	-0.2317099	166.2	-0.2738371
166.4	0.2498469	166.4	0.2051195	166.4	0.2603465	166.4	0.2379835	166.4	0.2108505	166.4	0.2463113	166.4	0.2818682	166.4	-0.2816184	166.4	-0.2999895	166.4	-0.3205355	166.4	-0.2784911	166.4	-0.2549885	166.4	-0.2696098	166.4	-0.2379053	166.4	-0.2299686	166.4	-0.2731963
166.6	0.2536386	166.6	0.211252	166.6	0.2667889	166.6	0.2440605	166.6	0.2129995	166.6	0.2561816	166.6	0.2857068	166.6	-0.2790727	166.6	-0.3047098	166.6	-0.3204501	166.6	-0.2681097	166.6	-0.2523432	166.6	-0.2654992	166.6	-0.2359099	166.6	-0.2340769	166.6	-0.2763112
166.8	0.2566352	166.8	0.2226583	166.8	0.2736421	166.8	0.2503758	166.8	0.2166129	166.8	0.2558438	166.8	0.289169	166.8	-0.2786977	166.8	-0.3035944	166.8	-0.3230208	166.8	-0.2736847	166.8	-0.2476306	166.8	-0.2696095	166.8	-0.2365438	166.8	-0.2321918	166.8	-0.2692981
167	0.2638855	167	0.2216511	167	0.2748162	167	0.25266	167	0.220789	167	0.2627214	167	0.291841	167	-0.2770845	167	-0.3038042	167	-0.3187139	167	-0.2709199	167	-0.2496229	167	-0.26915	167	-0.2389075	167	-0.2294889	167	-0.270159
167.2	0.2670173	167.2	0.2273317	167.2	0.2851389	167.2	0.2602334	167.2	0.2303048	167.2	0.2672108	167.2	0.2964951	167.2	-0.2739501	167.2	-0.3003829	167.2	-0.3200924	167.2	-0.2734707	167.2	-0.2488561	167.2	-0.2711628	167.2	-0.233052	167.2	-0.2338055	167.2	-0.2733813
167.4	0.2742648	167.4	0.2310267	167.4	0.2863525	167.4	0.2634262	167.4	0.2318144	167.4	0.2753826	167.4	0.3058823	167.4	-0.2777985	167.4	-0.3018172	167.4	-0.3176297	167.4	-0.2700151	167.4	-0.2478179	167.4	-0.2690564	167.4	-0.2363035	167.4	-0.2299012	167.4	-0.2670819
167.6	0.2756951	167.6	0.2384558	167.6	0.2966654	167.6	0.2694289	167.6	0.236726	167.6	0.2785916	167.6	0.3111307	167.6	-0.2772942	167.6	-0.3010683	167.6	-0.3221983	167.6	-0.2739832	167.6	-0.2505052	167.6	-0.2688732	167.6	-0.2355509	167.6	-0.2292569	167.6	-0.2733137
167.8	0.2821078	167.8	0.2416518	167.8	0.2976052	167.8	0.2741488	167.8	0.2450468	167.8	0.2876315	167.8	0.3186178	167.8	-0.2762984	167.8	-0.2994623	167.8	-0.3158615	167.8	-0.273583	167.8	-0.2488928	167.8	-0.264518	167.8	-0.2334075	167.8	-0.2252041	167.8	-0.2711521
168	0.287719	168	0.2444874	168	0.3010103	168	0.278011	168	0.2497887	168	0.2897548	168	0.3145274	168	-0.2749858	168	-0.2988497	168	-0.3212925	168	-0.2711205	168	-0.2503007	168	-0.2628036	168	-0.2346736	168	-0.2302973	168	-0.2746286
168.2	0.2939079	168.2	0.2541428	168.2	0.3089148	168.2	0.2824921	168.2	0.2530909	168.2	0.2977622	168.2	0.3245678	168.2	-0.2796063	168.2	-0.3002938	168.2	-0.3189247	168.2	-0.2700762	168.2	-0.2458844	168.2	-0.2671245	168.2	-0.2365622	168.2	-0.2320737	168.2	-0.2793216
168.4	0.3012339	168.4	0.25598	168.4	0.3158004	168.4	0.2865217	168.4	0.2636206	168.4	0.3009817	168.4	0.3314907	168.4	-0.2740991	168.4	-0.303775	168.4	-0.3222734	168.4	-0.27568	168.4	-0.247442	168.4	-0.2672369	168.4	-0.2346384	168.4	-0.2266344	168.4	-0.2713929
168.6	0.3051894	168.6	0.2636541	168.6	0.3214692	168.6	0.2896302	168.6	0.2601704	168.6	0.3056494	168.6	0.3318762	168.6	-0.2732838	168.6	-0.3014492	168.6	-0.3247647	168.6	-0.2734341	168.6	-0.2457455	168.6	-0.2669346	168.6	-0.2389459	168.6	-0.227708	168.6	-0.271882
168.8	0.3087521	168.8	0.2665586	168.8	0.3225994	168.8	0.3005269	168.8	0.2692214	168.8	0.3062577	168.8	0.341921	168.8	-0.274614	168.8	-0.3012173	168.8	-0.322621	168.8	-0.2723817	168.8	-0.2473445	168.8	-0.2700723	168.8	-0.2342364	168.8	-0.229677	168.8	-0.2723991
169	0.3140607	169	0.2750665	169	0.330932	169	0.2999847	169	0.2722335	169	0.3122792	169	0.3458	169	-0.2722327	169	-0.2980546	169	-0.3173409	169	-0.2698496	169	-0.2441425	169	-0.2645793	169	-0.2320831	169	-0.2262682	169	-0.2657086
169.2	0.3168008	169.2	0.2764587	169.2	0.3337781	169.2	0.3075721	169.2	0.2810367	169.2	0.3177006	169.2	0.345018	169.2	-0.279208	169.2	-0.299619	169.2	-0.319344	169.2	-0.269791	169.2	-0.2503988	169.2	-0.2657126	169.2	-0.2310852	169.2	-0.2284493	169.2	-0.2703651
169.4	0.3219074	169.4	0.2809525	169.4	0.3409336	169.4	0.3169751	169.4	0.282857	169.4	0.3256099	169.4	0.3510897	169.4	-0.2784524	169.4	-0.2962067	169.4	-0.3184056	169.4	-0.2658933	169.4	-0.2475693	169.4	-0.2671238	169.4	-0.2323528	169.4	-0.2201876	169.4	-0.2695105
169.6	0.3269266	169.6	0.2857898	169.6	0.3401065	169.6	0.3174834	169.6	0.2842386	169.6	0.3251465	169.6	0.3572065	169.6	-0.2729536	169.6	-0.3000382	169.6	-0.3199372	169.6	-0.2695762	169.6	-0.244296	169.6	-0.2599733	169.6	-0.2323097	169.6	-0.2271937	169.6	-0.2685498
169.8	0.3276105	169.8	0.2933079	169.8	0.3467909	169.8	0.3159423	169.8	0.290537	169.8	0.3334506	169.8	0.3656617	169.8	-0.2718341	169.8	-0.3006613	169.8	-0.318247	169.8	-0.2677459	169.8	-0.2458505	169.8	-0.2630047	169.8	-0.2330815	169.8	-0.2258978	169.8	-0.2743278
170	0.3320772	170	0.2922574	170	0.3520866	170	0.3255368	170	0.2940367	170	0.338486	170	0.3709086	170	-0.273699	170	-0.3012943	170	-0.3180357	170	-0.2700972	170	-0.24823	170	-0.2659835	170	-0.2321842	170	-0.2291011	170	-0.2727057
170.2	0.3475734	170.2	0.2973219	170.2	0.3550111	170.2	0.3318563	170.2	0.3001194	170.2	0.3396112	170.2	0.3744927	170.2	-0.2781137	170.2	-0.2975714	170.2	-0.3197899	170.2	-0.2707221	170.2	-0.242509	170.2	-0.2606948	170.2	-0.2356565	170.2	-0.2212921	170.2	-0.2715085
170.4	0.3403401	170.4	0.3041157	170.4	0.3607721	170.4	0.3370855	170.4	0.3093309	170.4	0.3438425	170.4	0.3786954	170.4	-0.274495	170.4	-0.2966127	170.4	-0.3165225	170.4	-0.271148	170.4	-0.2457721	170.4	-0.2616082	170.4	-0.2311661	170.4	-0.2264851	170.4	-0.2680706
170.6	0.3505789	170.6	0.3040088	170.6	0.3637812	170.6	0.339843	170.6	0.3094402	170.6	0.3512783	170.6	0.3838416	170.6	-0.2711291	170.6	-0.2960879	170.6	-0.3147422	170.6	-0.2706321	170.6	-0.248955	170.6	-0.2646764	170.6	-0.2361487	170.6	-0.2243934	170.6	-0.2668045
170.8	0.3505374	170.8	0.3123708	170.8	0.3673734	170.8	0.3433442	170.8	0.3127607	170.8	0.3553315	170.8	0.3799681	170.8	-0.2716785	170.8	-0.3018411	170.8	-0.3119821	170.8	-0.270505	170.8	-0.2465082	170.8	-0.2613621	170.8	-0.2268112	170.8	-0.2223712	170.8	-0.2703989
171	0.3564157	171	0.3141003	171	0.3737478	171	0.3498078	171	0.3163407	171	0.3601747	171	0.3916231	171	-0.2724876	171	-0.2946209	171	-0.3135149	171	-0.2673684	171	-0.2464276	171	-0.2607111	171	-0.230253	171	-0.2231648	171	-0.2606139
171.2	0.3638597	171.2	0.3220197	171.2	0.3758216	171.2	0.356675	171.2	0.3250673	171.2	0.3622332	171.2	0.3920524	171.2	-0.268147	171.2	-0.2969475	171.2	-0.3153993	171.2	-0.2707234	171.2	-0.2436918	171.2	-0.2698059	171.2	-0.2287827	171.2	-0.2226332	171.2	-0.2624095
171.4	0.3656773	171.4	0.3220001	171.4	0.3780842	171.4	0.3569317	171.4	0.3288522	171.4	0.3708067	171.4	0.3991249	171.4	-0.2731734	171.4	-0.2955036	171.4	-0.3154354	171.4	-0.2673826	171.4	-0.2447902	171.4	-0.2613197	171.4	-0.2350121	171.4	-0.2243474	171.4	-0.267964
171.6	0.3746161	171.6	0.3316647	171.6	0.384498	171.6	0.3569042	171.6	0.3345157	171.6	0.3708121	171.6	0.4016844	171.6	-0.2730733	171.6	-0.2948225	171.6	-0.3180112	171.6	-0.2676322	171.6	-0.2454678	171.6	-0.2624415	171.6	-0.2282359	171.6	-0.2178068	171.6	-0.2609113
171.8	0.3735777	171.8	0.3325997	171.8	0.3903188	171.8	0.362142	171.8	0.3348266	171.8	0.3781982	171.8	0.4067895	171.8	-0.2697985	171.8	-0.2946036	171.8	-0.3142847	171.8	-0.2706813	171.8	-0.2445522	171.8	-0.2658419	171.8	-0.2301361	171.8	-0.2248455	171.8	-0.2663806
172	0.379442	172	0.3341244	172	0.3944229	172	0.3664725	172	0.3394251	172	0.3811361	172	0.4109978	172	-0.271564	172	-0.2921237	172	-0.3168117	172	-0.2676505	172	-0.2403724	172	-0.264832	172	-0.2327258	172	-0.2214573	172	-0.2664517
172.2	0.3826097	172.2	0.3445094	172.2	0.3976257	172.2	0.3759774	172.2	0.3463505	172.2	0.3818851	172.2	0.4117531	172.2	-0.27262	172.2	-0.2969327	172.2	-0.3149356	172.2	-0.268583	172.2	-0.2427274	172.2	-0.2611155	172.2	-0.2332955	172.2	-0.225047	172.2	-0.2659129
172.4	0.3838798	172.4	0.3458301	172.4	0.4056328	172.4	0.3713395	172.4	0.3490242	172.4	0.3878226	172.4	0.4224873	172.4	-0.2681882	172.41	-0.2933128	172.41	-0.3151781	172.41	-0.2692401	172.41	-0.2445317	172.41	-0.2610597	172.41	-0.2307148	172.41	-0.2214518	172.41	-0.2642081
172.6	0.3867554	172.6	0.3539655	172.6	0.4087884	172.6	0.3781574	172.6	0.3471967	172.6	0.3936918	172.6	0.4225986	172.6	-0.2696392	172.6	-0.2990847	172.6	-0.3130228	172.6	-0.2699107	172.6	-0.2447986	172.6	-0.2630146	172.6	-0.2284181	172.6	-0.2189558	172.6	-0.2619317
172.8	0.3991838	172.8	0.3583041	172.8	0.4094741	172.8	0.3807684	172.8	0.3524816	172.8	0.393053	172.8	0.4257716	172.8	-0.2710714	172.8	-0.2988996	172.8	-0.3184826	172.8	-0.2625476	172.8	-0.2462395	172.8	-0.2618262	172.8	-0.2268309	172.8	-0.2216777	172.8	-0.2650977
173	0.4001426	173	0.3552814	173	0.4136482	173	0.3906104	173	0.3599436	173	0.4000423	173	0.4365885	173	-0.2732359	173	-0.2914693	173	-0.3135338	173	-0.2663929	173	-0.2394075	173	-0.2621654	173	-0.2294635	173	-0.2281663	173	-0.2636071
173.2	0.4010653	173.2	0.3646319	173.2	0.4171132	173.2	0.3986615	173.2	0.3614204	173.2	0.4009983	173.2	0.4333623	173.2	-0.2706512	173.2	-0.2963241	173.2	-0.3158407	173.2	-0.2690261	173.2	-0.2373733	173.2	-0.2591377	173.2	-0.2264277	173.2	-0.2206127	173.2	-0.2661397
173.4	0.4031583	173.4	0.3667339	173.4	0.4267696	173.4	0.3968879	173.4	0.3686073	173.4	0.4109389	173.4	0.4374928	173.4	-0.2750002	173.4	-0.2928289	173.4	-0.3159274	173.4	-0.2700012	173.4	-0.2454068	173.4	-0.2592098	173.4	-0.2284602	173.4	-0.2233636	173.4	-0.2619983
173.6	0.4119499	173.6	0.3688939	173.6	0.4267408	173.6	0.4027156	173.6	0.3670861	173.6	0.4134727	173.6	0.4422778	173.6	-0.2742695	173.6	-0.2958085	173.6	-0.318941	173.6	-0.2654178	173.6	-0.2415422	173.6	-0.261206	173.6	-0.229361	173.6	-0.2197928	173.6	-0.2662224
173.8	0.4100026	173.8	0.3708104	173.8	0.4284752	173.8	0.4069221	173.8	0.3744437	173.8	0.4168453	173.8	0.4471395	173.8	-0.2676875	173.8	-0.290587	173.8	-0.3129665	173.8	-0.2637358	173.8	-0.2462254	173.8	-0.2558324	173.8	-0.2303026	173.8	-0.2176981	173.8	-0.2699925
174	0.4195766	174	0.3750752	174	0.4328775	174	0.4065039	174	0.3782439	174	0.4209403	174	0.448796	174	-0.2680423	174	-0.2965131	174	-0.311095	174	-0.2655725	174	-0.2391799	174	-0.2563837	174	-0.2279543	174	-0.2234161	174	-0.2629844
174.2	0.4214111	174.2	0.3819809	174.2	0.433698	174.2	0.4119776	174.2	0.3794419	174.2	0.4250183	174.2	0.4546496	174.2	-0.2722915	174.2	-0.2969449	174.2	-0.3109885	174.2	-0.2615505	174.2	-0.2412601	174.2	-0.2587073	174.2	-0.2249992	174.2	-0.2187386	174.2	-0.2636525
174.4	0.4279552	174.4	0.3826251	174.4	0.4436907	174.4	0.4136454	174.4	0.3853234	174.4	0.4280351	174.4	0.4644046	174.4	-0.2661048	174.4	-0.2917859	174.4	-0.3116582	174.4	-0.2672512	174.4	-0.2417724	174.4	-0.2583367	174.4	-0.2277794	174.4	-0.2149513	174.4	-0.2631314
174.6	0.4309678	174.6	0.3905475	174.6	0.4397973	174.6	0.4178967	174.6	0.387751	174.6	0.4326318	174.6	0.4609151	174.6	-0.2698638	174.6	-0.2925931	174.6	-0.3149036	174.6	-0.2626674	174.6	-0.2415389	174.6	-0.2581005	174.6	-0.2305858	174.6	-0.2206009	174.6	-0.2642053
174.8	0.4310302	174.8	0.393124	174.8	0.4470542	174.8	0.4221605	174.8	0.3971257	174.8	0.4311214	174.8	0.4698001	174.8	-0.2698393	174.8	-0.2938175	174.8	-0.3127399	174.8	-0.2612264	174.8	-0.2430792	174.8	-0.2558879	174.8	-0.2262409	174.8	-0.2194607	174.8	-0.2563845
175	0.4388286	175	0.3950132	175	0.4549796	175	0.4327205	175	0.3983612	175	0.4353928	175	0.4697941	175	-0.2680294	175	-0.3009556	175	-0.3113879	175	-0.2648241	175	-0.2344162	175	-0.2636649	175	-0.2241727	175	-0.220677	175	-0.2625575
175.2	0.4359995	175.2	0.4018141	175.2	0.4521207	175.2	0.4285413	175.2	0.4009226	175.2	0.4381379	175.2	0.4732414	175.2	-0.2724198	175.2	-0.2950244	175.2	-0.3085622	175.2	-0.2581674	175.2	-0.2442258	175.2	-0.2597853	175.2	-0.2305418	175.2	-0.2173244	175.2	-0.2659222
175.4	0.4440536	175.4	0.4048758	175.4	0.4546184	175.4	0.4339688	175.4	0.4037689	175.4	0.4440141	175.4	0.4755346	175.4	-0.264484	175.4	-0.2890215	175.4	-0.3131196	175.4	-0.2599019	175.4	-0.2406103	175.4	-0.2571076	175.4	-0.2292949	175.4	-0.2137278	175.4	-0.2653879
175.6	0.4453276	175.6	0.4060646	175.6	0.46275	175.6	0.4358407	175.6	0.4046645	175.6	0.4477266	175.6	0.4816492	175.6	-0.2656046	175.6	-0.2905293	175.6	-0.3106731	175.6	-0.2655371	175.6	-0.238033	175.6	-0.2586103	175.6	-0.2254009	175.6	-0.2185623	175.6	-0.2618305
175.8	0.4491445	175.8	0.4071226	175.8	0.4683814	175.8	0.4401157	175.8	0.4090703	175.8	0.4522068	175.8	0.4834878	175.8	-0.2699089	175.8	-0.2915985	175.8	-0.3115164	175.8	-0.2628569	175.8	-0.2423342	175.8	-0.2545384	175.8	-0.2239904	175.8	-0.2186385	175.8	-0.2647472
176	0.4545487	176	0.4129189	176	0.467088	176	0.4427109	176	0.4154012	176	0.4523077	176	0.4884193	176	-0.2683888	176	-0.2890376	176	-0.3126465	176	-0.258664	176	-0.2402023	176	-0.2594672	176	-0.2232065	176	-0.2200411	176	-0.2648134
176.2	0.4558716	176.2	0.4194019	176.2	0.4745641	176.2	0.4492076	176.2	0.4208971	176.2	0.4564964	176.2	0.4923178	176.2	-0.2689423	176.2	-0.2897142	176.2	-0.3131622	176.2	-0.2653276	176.2	-0.2387599	176.2	-0.2561911	176.2	-0.2319668	176.2	-0.2161726	176.2	-0.2645464
176.4	0.4578037	176.4	0.416045	176.4	0.4804483	176.4	0.4485262	176.4	0.4204418	176.4	0.4594645	176.4	0.494288	176.4	-0.2696126	176.4	-0.293345	176.4	-0.3087978	176.4	-0.2608222	176.4	-0.2416848	176.4	-0.2615887	176.4	-0.2260726	176.4	-0.2167328	176.4	-0.264108
176.6	0.46624	176.6	0.4280615	176.6	0.482073	176.6	0.4517619	176.6	0.4229166	176.6	0.464859	176.6	0.5022646	176.6	-0.269384	176.6	-0.291946	176.6	-0.308108	176.6	-0.2632968	176.6	-0.2399808	176.6	-0.2557338	176.6	-0.2205894	176.6	-0.2179835	176.6	-0.2660782
176.8	0.4687458	176.8	0.428811	176.8	0.4821794	176.8	0.4547176	176.8	0.4300889	176.8	0.4652473	176.8	0.4977452	176.8	-0.267137	176.8	-0.2901779	176.8	-0.3099869	176.8	-0.2666555	176.8	-0.2401883	176.8	-0.2586861	176.8	-0.2232184	176.8	-0.2176228	176.8	-0.2587911
177	0.4694907	177	0.4301481	177	0.4868115	177	0.4576013	177	0.4261976	177	0.4723114	177	0.5041685	177	-0.2687147	177	-0.2913873	177	-0.3024999	177	-0.2606968	177	-0.2434745	177	-0.2565	177	-0.2246759	177	-0.2171542	177	-0.2591012
177.2	0.4755894	177.2	0.4338752	177.2	0.4930239	177.2	0.4638271	177.2	0.4329589	177.2	0.4756493	177.2	0.508436	177.2	-0.2675542	177.2	-0.2905233	177.2	-0.3070885	177.2	-0.2604077	177.2	-0.2366596	177.2	-0.2496675	177.2	-0.2233066	177.2	-0.2199649	177.2	-0.2587186
177.4	0.4798024	177.4	0.440032	177.4	0.4954547	177.4	0.4650829	177.4	0.4333813	177.4	0.476261	177.4	0.5064079	177.4	-0.2679732	177.4	-0.2904191	177.4	-0.3107033	177.4	-0.2589208	177.4	-0.2380795	177.4	-0.2541481	177.4	-0.2245334	177.4	-0.2165059	177.4	-0.2607021
177.6	0.47565	177.6	0.4408998	177.6	0.4929701	177.6	0.4723608	177.6	0.4397155	177.6	0.4845581	177.6	0.5119395	177.6	-0.2672821	177.6	-0.2929843	177.6	-0.3058717	177.6	-0.2588477	177.6	-0.234043	177.6	-0.2584179	177.6	-0.2225781	177.6	-0.2134443	177.6	-0.2630866
177.8	0.4863495	177.8	0.4489266	177.8	0.5010692	177.8	0.4715963	177.8	0.4421679	177.8	0.4821917	177.8	0.5185148	177.8	-0.2695145	177.8	-0.2871993	177.8	-0.3077124	177.8	-0.2605909	177.8	-0.2339885	177.8	-0.2558534	177.8	-0.2246527	177.8	-0.2156908	177.8	-0.2617775
178	0.4895721	178	0.4480576	178	0.5026065	178	0.4805102	178	0.4506345	178	0.4897887	178	0.5172193	178	-0.2683669	178	-0.2954091	178	-0.3088838	178	-0.2587297	178	-0.2334685	178	-0.254897	178	-0.2209719	178	-0.2150804	178	-0.2617336
178.2	0.4896066	178.2	0.4505959	178.2	0.5036668	178.2	0.4786901	178.2	0.4528858	178.2	0.4948465	178.2	0.5248222	178.2	-0.2673584	178.2	-0.2874016	178.2	-0.3078506	178.2	-0.2581721	178.2	-0.2393074	178.2	-0.2505084	178.2	-0.2223295	178.2	-0.2137421	178.2	-0.2616461
178.4	0.4911368	178.4	0.4560402	178.4	0.5071034	178.4	0.4786701	178.4	0.4511233	178.4	0.4944858	178.4	0.5325416	178.4	-0.2640946	178.4	-0.2896076	178.4	-0.3043251	178.4	-0.2617607	178.4	-0.2374841	178.4	-0.2554483	178.4	-0.2230027	178.4	-0.2134299	178.4	-0.2641728
178.6	0.4987564	178.6	0.4603018	178.6	0.5123999	178.6	0.4891103	178.6	0.4544689	178.6	0.4964641	178.6	0.5302354	178.6	-0.2642748	178.6	-0.2901656	178.6	-0.3067924	178.6	-0.2594011	178.6	-0.2355334	178.6	-0.2590654	178.6	-0.2243442	178.6	-0.2183632	178.6	-0.2632436
178.8	0.5004569	178.8	0.4553158	178.8	0.5156932	178.8	0.4919609	178.8	0.4568496	178.8	0.5020007	178.8	0.5303071	178.8	-0.2624617	178.8	-0.2893063	178.8	-0.3109513	178.8	-0.2575826	178.8	-0.2359309	178.8	-0.2473237	178.8	-0.2207935	178.8	-0.2189743	178.8	-0.258127
179	0.5021366	179	0.4614578	179	0.5169317	179	0.4896364	179	0.4609123	179	0.5034559	179	0.5371072	179	-0.2602451	179	-0.2868552	179	-0.3054586	179	-0.2602639	179	-0.2337998	179	-0.2549618	179	-0.2208018	179	-0.2169458	179	-0.2617225
179.2	0.509259	179.2	0.4672823	179.2	0.5228729	179.2	0.4935026	179.2	0.4651918	179.2	0.5092542	179.2	0.5409466	179.2	-0.2689285	179.2	-0.2855226	179.2	-0.3079665	179.2	-0.2616075	179.2	-0.2378403	179.2	-0.2559546	179.2	-0.2201505	179.2	-0.2149119	179.2	-0.259898
179.4	0.5078745	179.4	0.4732857	179.4	0.5258083	179.4	0.4956601	179.4	0.4665596	179.4	0.5072779	179.4	0.5414826	179.4	-0.2685971	179.4	-0.2876923	179.4	-0.3016244	179.4	-0.2564681	179.4	-0.2302338	179.4	-0.2508908	179.4	-0.223163	179.4	-0.2146317	179.4	-0.2573572
179.6	0.5106609	179.6	0.4750075	179.6	0.5281298	179.6	0.5037912	179.6	0.4679331	179.6	0.5151343	179.6	0.5489793	179.6	-0.2629967	179.6	-0.2910703	179.6	-0.3086801	179.6	-0.2592005	179.6	-0.2321227	179.6	-0.2575791	179.6	-0.2227582	179.6	-0.2115515	179.6	-0.262071
179.8	0.5176964	179.8	0.4770456	179.8	0.5310002	179.8	0.5050564	179.8	0.4770825	179.8	0.512929	179.8	0.5460553	179.8	-0.2679024	179.8	-0.2848783	179.8	-0.3065652	179.8	-0.2606386	179.8	-0.2364695	179.8	-0.2544082	179.8	-0.220339	179.8	-0.2169833	179.8	-0.2599254
180	0.5244313	180	0.4794593	180	0.5333927	180	0.5073269	180	0.4783534	180	0.5162547	180	0.5546848	180	-0.2572757	180	-0.2849686	180	-0.3073027	180	-0.2527504	180	-0.2358096	180	-0.2547972	180	-0.222005	180	-0.2103569	180	-0.2607895
180.2	0.521159	180.2	0.4824412	180.2	0.5382206	180.2	0.5041229	180.2	0.478917	180.2	0.5192467	180.2	0.5541328	180.2	-0.2622661	180.2	-0.2847675	180.2	-0.3068432	180.2	-0.256091	180.2	-0.2407401	180.2	-0.2507165	180.2	-0.216597	180.2	-0.2168654	180.2	-0.2598705
180.4	0.522074	180.4	0.4900742	180.4	0.5462184	180.4	0.5138712	180.4	0.4861609	180.4	0.5244761	180.4	0.5549441	180.4	-0.264006	180.4	-0.2858815	180.4	-0.30598	180.4	-0.2577388	180.4	-0.2313555	180.4	-0.2494798	180.4	-0.2240868	180.4	-0.2144974	180.4	-0.2618438
180.6	0.5267817	180.6	0.4893856	180.6	0.5400134	180.6	0.5143198	180.6	0.4836012	180.6	0.5265961	180.6	0.5584356	180.6	-0.2617679	180.6	-0.2863503	180.6	-0.3064671	180.6	-0.2577589	180.6	-0.2316989	180.6	-0.2542304	180.6	-0.2219074	180.6	-0.2114685	180.6	-0.2596609
180.8	0.5286844	180.8	0.4916922	180.8	0.5447387	180.8	0.5184216	180.8	0.4858214	180.8	0.5279843	180.8	0.5599474	180.8	-0.2657633	180.8	-0.2876184	180.8	-0.3029468	180.8	-0.2564072	180.8	-0.2333398	180.8	-0.2484761	180.8	-0.2189926	180.8	-0.2134479	180.8	-0.2583744
181	0.5350187	181	0.4961648	181	0.5442732	181	0.5232954	181	0.4890387	181	0.535924	181	0.5654938	181	-0.2608587	181.01	-0.281487	181.01	-0.3041191	181.01	-0.2600641	181.01	-0.2342071	181.01	-0.2471728	181.01	-0.219079	181.01	-0.2095753	181.01	-0.2603666
181.2	0.5364124	181.2	0.495243	181.2	0.554352	181.2	0.5246513	181.2	0.4921683	181.2	0.5371002	181.2	0.5659943	181.2	-0.260149	181.2	-0.2872054	181.2	-0.3051489	181.2	-0.2576651	181.2	-0.2375204	181.2	-0.2488612	181.2	-0.2196854	181.2	-0.2124627	181.2	-0.2567322
181.4	0.5395193	181.4	0.5008907	181.4	0.5567624	181.4	0.5280924	181.4	0.4996293	181.4	0.5368894	181.4	0.5688488	181.4	-0.2653086	181.4	-0.2849748	181.4	-0.305761	181.4	-0.2562424	181.4	-0.233068	181.4	-0.2492045	181.4	-0.2206251	181.4	-0.2118838	181.4	-0.2581505
181.6	0.5414882	181.6	0.5006058	181.6	0.5565226	181.6	0.5313641	181.6	0.4985755	181.6	0.5408126	181.6	0.5750847	181.6	-0.2637801	181.6	-0.284529	181.6	-0.3066154	181.6	-0.2542569	181.6	-0.235225	181.6	-0.2521372	181.6	-0.2187182	181.6	-0.2127945	181.6	-0.2555746
181.8	0.5452017	181.8	0.5041991	181.8	0.5575172	181.8	0.5294327	181.8	0.5029637	181.8	0.5418389	181.8	0.5766033	181.8	-0.26245	181.8	-0.2845822	181.8	-0.3071611	181.8	-0.2559026	181.8	-0.2295495	181.8	-0.2518403	181.8	-0.2184933	181.8	-0.2130906	181.8	-0.2559429
182	0.5471072	182	0.5115972	182	0.564728	182	0.5364305	182	0.5060353	182	0.5468746	182	0.5788867	182	-0.2619814	182	-0.2803142	182	-0.3010397	182	-0.2576903	182	-0.233475	182	-0.2470719	182	-0.218695	182	-0.2098214	182	-0.2564307
182.2	0.5486346	182.2	0.5083433	182.2	0.5645948	182.2	0.5364929	182.2	0.5107675	182.2	0.5497203	182.2	0.5806352	182.2	-0.2624382	182.2	-0.2846775	182.2	-0.3031763	182.2	-0.2521881	182.2	-0.2341322	182.2	-0.2500074	182.2	-0.217004	182.2	-0.2130862	182.2	-0.2545381
182.4	0.5523772	182.4	0.5103869	182.4	0.5645074	182.4	0.5399032	182.4	0.5104851	182.4	0.5503779	182.4	0.586032	182.4	-0.2631325	182.4	-0.2823665	182.4	-0.3041928	182.4	-0.2541452	182.4	-0.236102	182.4	-0.2479649	182.4	-0.2203068	182.4	-0.2121042	182.4	-0.2555134
182.6	0.551823	182.6	0.5155098	182.6	0.5695825	182.6	0.5423887	182.6	0.5161726	182.6	0.55502	182.6	0.5885726	182.6	-0.2655462	182.6	-0.2841446	182.6	-0.2962964	182.6	-0.2527148	182.6	-0.2295398	182.6	-0.2507512	182.6	-0.2122414	182.6	-0.2104989	182.6	-0.2597873
182.8	0.556391	182.8	0.5223512	182.8	0.5755735	182.8	0.5478659	182.8	0.5152053	182.8	0.5583349	182.8	0.586438	182.8	-0.2629483	182.8	-0.2878045	182.8	-0.2996032	182.8	-0.2523099	182.8	-0.2307307	182.8	-0.2472705	182.8	-0.2170509	182.8	-0.2135321	182.8	-0.2554109
183	0.5578704	183	0.5244808	183	0.5746704	183	0.5526612	183	0.5111467	183	0.5581906	183	0.5943234	183	-0.2641287	183	-0.2854003	183	-0.2990864	183	-0.2541702	183	-0.233246	183	-0.2445377	183	-0.2184128	183	-0.208458	183	-0.2562777
183.2	0.5622515	183.2	0.5264263	183.2	0.5777762	183.2	0.553475	183.2	0.5294845	183.2	0.5641333	183.2	0.5964388	183.2	-0.2613642	183.2	-0.2824289	183.2	-0.3019317	183.2	-0.2510533	183.2	-0.230671	183.2	-0.2513455	183.2	-0.2118662	183.2	-0.209674	183.2	-0.2589943
183.4	0.5651361	183.4	0.5258777	183.4	0.5749726	183.4	0.5524015	183.4	0.520747	183.4	0.5642099	183.4	0.5996048	183.4	-0.2599883	183.4	-0.2824146	183.4	-0.300229	183.4	-0.2509546	183.4	-0.2281611	183.4	-0.250634	183.4	-0.2151674	183.4	-0.2105371	183.4	-0.2529157
183.6	0.5699056	183.6	0.5338306	183.6	0.5816249	183.6	0.559378	183.6	0.5237781	183.6	0.5664098	183.6	0.6008241	183.6	-0.2587651	183.6	-0.2868277	183.6	-0.3034085	183.6	-0.2545527	183.6	-0.2285092	183.6	-0.2503511	183.6	-0.217134	183.6	-0.2089874	183.6	-0.2608486
183.8	0.5680522	183.8	0.534977	183.8	0.5835968	183.8	0.5552806	183.8	0.5288121	183.8	0.573074	183.8	0.6043938	183.8	-0.2617545	183.8	-0.2840449	183.8	-0.2997954	183.8	-0.2537391	183.8	-0.2278053	183.8	-0.2469508	183.8	-0.2181828	183.8	-0.2090787	183.8	-0.2568027
184	0.5695367	184	0.5400478	184	0.5907385	184	0.5646934	184	0.5313083	184	0.5727254	184	0.6071795	184	-0.2653756	184	-0.2827899	184	-0.2978348	184	-0.252264	184	-0.2339107	184	-0.2528674	184	-0.2141994	184	-0.208179	184	-0.2538305
184.2	0.5760794	184.2	0.5373467	184.2	0.5902905	184.2	0.5594704	184.2	0.5335414	184.2	0.5774842	184.2	0.613331	184.2	-0.258543	184.2	-0.2852438	184.2	-0.3025133	184.2	-0.2500659	184.2	-0.2310422	184.2	-0.247617	184.2	-0.2180202	184.2	-0.210333	184.2	-0.2538181
184.4	0.580322	184.4	0.5438017	184.4	0.5954843	184.4	0.5646949	184.4	0.5359002	184.4	0.5802887	184.4	0.6089104	184.4	-0.256233	184.4	-0.2792112	184.4	-0.3047611	184.4	-0.2556625	184.4	-0.2295031	184.4	-0.2479769	184.4	-0.2166501	184.4	-0.2090103	184.4	-0.2564428
184.6	0.5768321	184.6	0.5428936	184.6	0.5976231	184.6	0.5624845	184.6	0.5369936	184.6	0.5756882	184.6	0.6147114	184.6	-0.2554791	184.6	-0.2783191	184.6	-0.2962991	184.6	-0.2516348	184.6	-0.2321921	184.6	-0.25291	184.6	-0.2141342	184.6	-0.2051568	184.6	-0.2517561
184.8	0.5835933	184.8	0.5466716	184.8	0.5960386	184.8	0.5706471	184.8	0.5433893	184.8	0.5853256	184.8	0.621027	184.8	-0.2576994	184.8	-0.2795247	184.8	-0.2981942	184.8	-0.2513514	184.8	-0.2282102	184.8	-0.2491213	184.8	-0.2124068	184.8	-0.2064693	184.8	-0.2543846
185	0.5869654	185	0.5495169	185	0.5983036	185	0.5738159	185	0.5430241	185	0.5886174	185	0.6181011	185	-0.2636861	185	-0.2812247	185	-0.302861	185	-0.2529553	185	-0.2254867	185	-0.2461278	185	-0.2154432	185	-0.2065323	185	-0.2505065
185.2	0.5902756	185.2	0.5502937	185.2	0.6047182	185.2	0.5760543	185.2	0.5498935	185.2	0.5870913	185.2	0.6204384	185.2	-0.2592735	185.2	-0.2840927	185.2	-0.2999279	185.2	-0.2525644	185.2	-0.2314322	185.2	-0.2501694	185.2	-0.2169505	185.2	-0.2057976	185.2	-0.2488122
185.4	0.5915481	185.4	0.5552949	185.4	0.6020434	185.4	0.5782139	185.4	0.5474427	185.4	0.59198	185.4	0.6252159	185.4	-0.2606175	185.4	-0.282592	185.4	-0.2975575	185.4	-0.2514811	185.4	-0.2278397	185.4	-0.2467974	185.4	-0.2154985	185.4	-0.2057672	185.4	-0.2575353
185.6	0.5871378	185.6	0.5558842	185.6	0.6077548	185.6	0.5821113	185.6	0.5533028	185.6	0.592198	185.6	0.627181	185.6	-0.2588561	185.6	-0.2813191	185.6	-0.3010118	185.6	-0.2546971	185.6	-0.226928	185.6	-0.2453988	185.6	-0.2172621	185.6	-0.2051637	185.6	-0.2533719
185.8	0.5914173	185.8	0.5594686	185.8	0.6083391	185.8	0.5844105	185.8	0.5515116	185.8	0.592307	185.8	0.6302577	185.8	-0.258458	185.8	-0.2776645	185.8	-0.297135	185.8	-0.2488172	185.8	-0.2305196	185.8	-0.2439911	185.8	-0.212925	185.8	-0.2060633	185.8	-0.2590456
186	0.6008182	186	0.5562733	186	0.6130798	186	0.583909	186	0.5557572	186	0.5977882	186	0.6305898	186	-0.2572787	186	-0.2812515	186	-0.2994224	186	-0.2512273	186	-0.2308935	186	-0.2477254	186	-0.2178406	186	-0.2054857	186	-0.2557431
186.2	0.5981269	186.2	0.5602944	186.2	0.6136159	186.2	0.5903561	186.2	0.5581442	186.2	0.5991567	186.2	0.6339582	186.2	-0.2585006	186.2	-0.2773345	186.2	-0.3004169	186.2	-0.2512536	186.2	-0.2281396	186.2	-0.2491947	186.2	-0.2143208	186.2	-0.2073418	186.2	-0.2520662
186.4	0.6018442	186.4	0.5618141	186.4	0.6147303	186.4	0.5902442	186.4	0.5561702	186.4	0.6036869	186.4	0.632948	186.4	-0.2564275	186.4	-0.2812994	186.4	-0.2934582	186.4	-0.2483383	186.4	-0.2272375	186.4	-0.2424992	186.4	-0.2155583	186.4	-0.2091245	186.4	-0.2544856
186.6	0.6015323	186.6	0.5698224	186.6	0.6192347	186.6	0.5920385	186.6	0.567843	186.6	0.6054435	186.6	0.6433286	186.6	-0.2565863	186.6	-0.2767737	186.6	-0.2978547	186.6	-0.252492	186.6	-0.2254617	186.6	-0.2487705	186.6	-0.2083234	186.6	-0.2082706	186.6	-0.2518957
186.8	0.6058227	186.8	0.5733025	186.8	0.6237276	186.8	0.6008319	186.8	0.5653139	186.8	0.6073592	186.8	0.6393496	186.8	-0.258342	186.8	-0.2799142	186.8	-0.2965041	186.8	-0.2474304	186.8	-0.2288739	186.8	-0.2421257	186.8	-0.2150474	186.8	-0.2059394	186.8	-0.2506153
187	0.6070281	187	0.5718087	187	0.6205559	187	0.5967636	187	0.5643088	187	0.610428	187	0.6456429	187	-0.2575408	187	-0.2789926	187	-0.2986424	187	-0.248795	187	-0.2282584	187	-0.2438982	187	-0.2128005	187	-0.2018535	187	-0.2493493
187.2	0.6081108	187.2	0.5747034	187.2	0.6234523	187.2	0.6054953	187.2	0.5658762	187.2	0.608199	187.2	0.6477943	187.2	-0.255508	187.2	-0.2786253	187.2	-0.2993092	187.2	-0.2483508	187.2	-0.2284542	187.2	-0.2440137	187.2	-0.2151645	187.2	-0.2059779	187.2	-0.2529635
187.4	0.6126909	187.4	0.5751687	187.4	0.6293184	187.4	0.5968063	187.4	0.572171	187.4	0.6174691	187.4	0.6488287	187.4	-0.2582957	187.4	-0.277466	187.4	-0.2918401	187.4	-0.2518924	187.4	-0.2260941	187.4	-0.245675	187.4	-0.2105197	187.4	-0.2068096	187.4	-0.2544839
187.6	0.6200937	187.6	0.5783985	187.6	0.6288217	187.6	0.6012552	187.6	0.5765443	187.6	0.6163617	187.6	0.6478863	187.6	-0.2572914	187.6	-0.2799569	187.6	-0.2963577	187.6	-0.2442871	187.6	-0.228879	187.6	-0.2457318	187.6	-0.2162554	187.6	-0.2011625	187.6	-0.251404
187.8	0.6187636	187.8	0.5828239	187.8	0.6298453	187.8	0.6058481	187.8	0.5769314	187.8	0.6184294	187.8	0.6508663	187.8	-0.2555778	187.8	-0.2766359	187.8	-0.2997998	187.8	-0.2443609	187.8	-0.2264378	187.8	-0.2434702	187.8	-0.210757	187.8	-0.2019504	187.8	-0.2528251
188	0.6247571	188	0.5803077	188	0.6363993	188	0.6087402	188	0.5758634	188	0.616366	188	0.6557183	188	-0.2560787	188	-0.2776708	188	-0.2977711	188	-0.2526324	188	-0.2243523	188	-0.2424976	188	-0.2133377	188	-0.2050022	188	-0.2510432
188.2	0.6206857	188.2	0.5840159	188.2	0.6356216	188.2	0.6139411	188.2	0.5774583	188.2	0.6225862	188.2	0.6618511	188.2	-0.2563497	188.2	-0.2757105	188.2	-0.2953112	188.2	-0.2490011	188.2	-0.2289113	188.2	-0.2471355	188.2	-0.2104358	188.2	-0.2040639	188.2	-0.2514098
188.4	0.6217557	188.4	0.5896182	188.4	0.6411366	188.4	0.6126	188.4	0.5822083	188.4	0.6268701	188.4	0.6527466	188.4	-0.2584829	188.4	-0.2792015	188.4	-0.2969086	188.4	-0.2478814	188.4	-0.2325324	188.4	-0.2440919	188.4	-0.210734	188.4	-0.2007773	188.4	-0.2515685
188.6	0.6254399	188.6	0.5949822	188.6	0.6429639	188.6	0.6121776	188.6	0.585152	188.6	0.6250039	188.6	0.6599915	188.6	-0.2567261	188.6	-0.2834815	188.6	-0.2991742	188.6	-0.2444339	188.6	-0.2244167	188.6	-0.2472993	188.6	-0.2174301	188.6	-0.2066044	188.6	-0.2521613
188.8	0.6311306	188.8	0.5901031	188.8	0.6458762	188.8	0.6168313	188.8	0.5874271	188.8	0.6315771	188.8	0.6650852	188.8	-0.2522392	188.8	-0.2752403	188.8	-0.2980166	188.8	-0.2511856	188.8	-0.224481	188.8	-0.242489	188.8	-0.2127083	188.8	-0.2031648	188.8	-0.2501222
189	0.6298413	189	0.5948833	189	0.6434286	189	0.6213704	189	0.5886998	189	0.6311367	189	0.6628617	189	-0.2573883	189	-0.276918	189	-0.2972929	189	-0.2488006	189	-0.2278924	189	-0.2440784	189	-0.2175977	189	-0.2023633	189	-0.2520331
189.2	0.6328249	189.2	0.5996556	189.2	0.6492806	189.2	0.6211082	189.2	0.5950528	189.2	0.6358007	189.2	0.6657426	189.2	-0.2530901	189.2	-0.2767366	189.2	-0.2961945	189.2	-0.2474906	189.2	-0.2256266	189.2	-0.244559	189.2	-0.2121613	189.2	-0.2043959	189.2	-0.2489851
189.4	0.6353735	189.4	0.5983392	189.4	0.6519171	189.4	0.6269644	189.4	0.5936771	189.4	0.6332131	189.4	0.6723109	189.4	-0.250416	189.4	-0.2756581	189.4	-0.2968043	189.4	-0.2471783	189.4	-0.2268093	189.4	-0.2422018	189.4	-0.2103915	189.4	-0.2015941	189.4	-0.2456308
189.6	0.6393214	189.6	0.6011974	189.6	0.6537076	189.6	0.6260616	189.6	0.592774	189.6	0.6423065	189.6	0.6741353	189.6	-0.2502216	189.6	-0.2725762	189.6	-0.292494	189.6	-0.2480506	189.6	-0.225183	189.6	-0.242911	189.6	-0.2072773	189.6	-0.2027456	189.6	-0.2505294
189.8	0.6411459	189.8	0.604793	189.8	0.6538858	189.8	0.6289742	189.8	0.598659	189.8	0.6383962	189.8	0.6804605	189.8	-0.2517404	189.8	-0.274276	189.8	-0.2971761	189.8	-0.2446451	189.8	-0.2244284	189.8	-0.2395585	189.8	-0.214562	189.8	-0.2025726	189.8	-0.2532627
190	0.6384959	190	0.6022964	190	0.6560044	190	0.6294407	190	0.6041692	190	0.6440068	190	0.6746647	190	-0.2527388	190	-0.2725569	190	-0.2952332	190	-0.2478904	190	-0.2216814	190	-0.2388228	190	-0.2132966	190	-0.204407	190	-0.2507201
190.2	0.6472762	190.2	0.6073655	190.2	0.6598606	190.2	0.6329633	190.2	0.6043354	190.2	0.6433685	190.2	0.6790361	190.2	-0.2555869	190.2	-0.2781377	190.2	-0.2909743	190.2	-0.2466931	190.2	-0.2185913	190.2	-0.2416857	190.2	-0.2104946	190.2	-0.1954446	190.2	-0.249393
190.4	0.6475538	190.4	0.611968	190.4	0.6564603	190.4	0.6304333	190.4	0.6060661	190.4	0.6486982	190.4	0.6812224	190.4	-0.254036	190.4	-0.2739429	190.4	-0.2914928	190.4	-0.2467024	190.4	-0.2284808	190.4	-0.2459386	190.4	-0.2094516	190.4	-0.2028619	190.4	-0.2493414
190.6	0.6473688	190.6	0.6107805	190.6	0.6611333	190.6	0.6389376	190.6	0.6004541	190.6	0.6489412	190.6	0.6790265	190.6	-0.257529	190.61	-0.2723149	190.61	-0.2941515	190.61	-0.2470968	190.61	-0.2216071	190.61	-0.2403771	190.61	-0.2144902	190.61	-0.1986107	190.61	-0.249026
190.8	0.6521356	190.8	0.6132996	190.8	0.6631839	190.8	0.6397324	190.8	0.610392	190.8	0.6520597	190.8	0.6837508	190.8	-0.2533554	190.8	-0.2808369	190.8	-0.2956701	190.8	-0.2471547	190.8	-0.2252105	190.8	-0.2399664	190.8	-0.2103911	190.8	-0.2047952	190.8	-0.2486497
191	0.649969	191	0.6183025	191	0.666956	191	0.6450396	191	0.6122098	191	0.6554124	191	0.6852388	191	-0.2538884	191	-0.2743635	191	-0.2927776	191	-0.2434124	191	-0.2243489	191	-0.2387163	191	-0.2072938	191	-0.2022005	191	-0.246849
191.2	0.6543627	191.2	0.6175313	191.2	0.6643209	191.2	0.6419238	191.2	0.6128504	191.2	0.6563879	191.2	0.6927599	191.2	-0.2486822	191.2	-0.2768836	191.2	-0.2908409	191.2	-0.2393043	191.2	-0.2212898	191.2	-0.2422336	191.2	-0.2056203	191.2	-0.2005731	191.2	-0.2511586
191.4	0.6562213	191.4	0.6182898	191.4	0.6687813	191.4	0.6424485	191.4	0.6129594	191.4	0.6540452	191.4	0.6902698	191.4	-0.2555906	191.4	-0.2755476	191.4	-0.2918272	191.4	-0.2481125	191.4	-0.2237368	191.4	-0.2404266	191.4	-0.2095731	191.4	-0.1961779	191.4	-0.2472697
191.6	0.6542681	191.6	0.6237178	191.6	0.6754594	191.6	0.6491403	191.6	0.6150072	191.6	0.6554876	191.6	0.6975431	191.6	-0.2515761	191.6	-0.2757227	191.6	-0.2911031	191.6	-0.2461485	191.6	-0.2209968	191.6	-0.2344356	191.6	-0.2035722	191.6	-0.2004384	191.6	-0.2463362
191.8	0.6588324	191.8	0.6216507	191.8	0.676217	191.8	0.6506452	191.8	0.615593	191.8	0.659076	191.8	0.696075	191.8	-0.255203	191.8	-0.2738363	191.8	-0.2928236	191.8	-0.2475228	191.8	-0.2224046	191.8	-0.2369565	191.8	-0.2125888	191.8	-0.1978209	191.8	-0.2494755
192	0.6626369	192	0.626228	192	0.6773829	192	0.6491895	192	0.6222455	192	0.6637913	192	0.7001034	192	-0.2562589	192	-0.2678981	192	-0.2944656	192	-0.2429902	192	-0.2193245	192	-0.239909	192	-0.2083027	192	-0.2008177	192	-0.2455821
192.2	0.6643782	192.2	0.6298104	192.2	0.681787	192.2	0.655178	192.2	0.6196594	192.2	0.6633253	192.2	0.6994937	192.2	-0.2532378	192.2	-0.2772344	192.2	-0.2919393	192.2	-0.2421855	192.2	-0.2263093	192.2	-0.2391621	192.2	-0.2109461	192.2	-0.1996466	192.2	-0.2467336
192.4	0.6677029	192.4	0.6368183	192.4	0.6811445	192.4	0.6561646	192.4	0.6238558	192.4	0.667419	192.4	0.6973573	192.4	-0.248026	192.4	-0.2759258	192.4	-0.2892976	192.4	-0.2455736	192.4	-0.218806	192.4	-0.2414828	192.4	-0.2058896	192.4	-0.1962324	192.4	-0.2453025
192.6	0.6658765	192.6	0.6335992	192.6	0.6812104	192.6	0.6562456	192.6	0.6303726	192.6	0.6677535	192.6	0.7027618	192.6	-0.250827	192.6	-0.275384	192.6	-0.2922481	192.6	-0.2416315	192.6	-0.2179803	192.6	-0.2384745	192.6	-0.2063836	192.6	-0.2000252	192.6	-0.2432689
192.8	0.6650947	192.8	0.6333376	192.8	0.687112	192.8	0.657542	192.8	0.6286152	192.8	0.6728593	192.8	0.7080914	192.8	-0.2524859	192.8	-0.2725356	192.8	-0.2937537	192.8	-0.2433626	192.8	-0.2246797	192.8	-0.2388761	192.8	-0.208515	192.8	-0.1993111	192.8	-0.2435182
193	0.672772	193	0.6375173	193	0.6841945	193	0.6616801	193	0.6266584	193	0.6752262	193	0.7056225	193	-0.2504149	193	-0.2697439	193	-0.2978327	193	-0.2505058	193	-0.2159736	193	-0.2441868	193	-0.2095817	193	-0.1971571	193	-0.2446394
193.2	0.6756698	193.2	0.6341718	193.2	0.6892708	193.2	0.6635641	193.2	0.6297153	193.2	0.6762568	193.2	0.7085834	193.2	-0.2493756	193.2	-0.2749537	193.2	-0.2875467	193.2	-0.2450236	193.2	-0.2183385	193.2	-0.2401605	193.2	-0.2102138	193.2	-0.1964464	193.2	-0.2499946
193.4	0.6754246	193.4	0.6384273	193.4	0.6936205	193.4	0.6653855	193.4	0.6338397	193.4	0.6764293	193.4	0.709716	193.4	-0.2560056	193.4	-0.276056	193.4	-0.2893373	193.4	-0.2395527	193.4	-0.217049	193.4	-0.2387946	193.4	-0.2079741	193.4	-0.1990711	193.4	-0.2443713
193.6	0.6761137	193.6	0.645449	193.6	0.6951883	193.6	0.6639777	193.6	0.6399506	193.6	0.6748024	193.6	0.7168334	193.6	-0.2504191	193.6	-0.2716514	193.6	-0.2903433	193.6	-0.236906	193.6	-0.2196048	193.6	-0.2376224	193.6	-0.2069169	193.6	-0.1994925	193.6	-0.249969
193.8	0.6801574	193.8	0.6425673	193.8	0.6899387	193.8	0.6724695	193.8	0.6376483	193.8	0.6792474	193.8	0.7120685	193.8	-0.2543148	193.8	-0.2693332	193.8	-0.2933419	193.8	-0.24013	193.8	-0.2201958	193.8	-0.2375568	193.8	-0.2037719	193.8	-0.1984062	193.8	-0.2467449
194	0.6837906	194	0.6433451	194	0.6971671	194	0.6695182	194	0.6398444	194	0.6867777	194	0.714325	194	-0.2496511	194	-0.2727365	194	-0.2874609	194	-0.2410406	194	-0.2173665	194	-0.2372919	194	-0.2095072	194	-0.1980426	194	-0.2427528
194.2	0.6811507	194.2	0.6461774	194.2	0.698463	194.2	0.6719683	194.2	0.6414841	194.2	0.6843691	194.2	0.7197987	194.2	-0.2486201	194.2	-0.2685907	194.2	-0.2865783	194.2	-0.2423432	194.2	-0.2171393	194.2	-0.2349972	194.2	-0.2058976	194.2	-0.1982295	194.2	-0.2469302
194.4	0.6848699	194.4	0.6533428	194.4	0.6968974	194.4	0.6767498	194.4	0.6430566	194.4	0.6846094	194.4	0.7195916	194.4	-0.2481361	194.4	-0.2705162	194.4	-0.2864689	194.4	-0.2426181	194.4	-0.2162506	194.4	-0.2382148	194.4	-0.2076997	194.4	-0.1975969	194.4	-0.2432657
194.6	0.6859084	194.6	0.6523793	194.6	0.7024282	194.6	0.6850127	194.6	0.6470233	194.6	0.6878821	194.6	0.7197896	194.6	-0.2526508	194.6	-0.2728441	194.6	-0.2910777	194.6	-0.2419983	194.6	-0.2206471	194.6	-0.240431	194.6	-0.2060831	194.6	-0.2001231	194.6	-0.2420866
194.8	0.6926835	194.8	0.6530423	194.8	0.7074254	194.8	0.6786435	194.8	0.6488521	194.8	0.6933275	194.8	0.7221407	194.8	-0.2462581	194.8	-0.2718143	194.8	-0.2908727	194.8	-0.2378898	194.8	-0.2165245	194.8	-0.2362624	194.8	-0.2078702	194.8	-0.1977309	194.8	-0.2472633
195	0.6899064	195	0.6555815	195	0.7052654	195	0.6779937	195	0.6503505	195	0.6925467	195	0.7272891	195	-0.2503846	195	-0.2734342	195	-0.2883939	195	-0.2445876	195	-0.2157964	195	-0.2377864	195	-0.2036015	195	-0.2005272	195	-0.2414055
195.2	0.6930193	195.2	0.6586411	195.2	0.7048752	195.2	0.6838401	195.2	0.6498829	195.2	0.6919723	195.2	0.7265697	195.2	-0.2502354	195.2	-0.2662298	195.2	-0.2872736	195.2	-0.2388624	195.2	-0.2175925	195.2	-0.2355485	195.2	-0.204798	195.2	-0.1935921	195.2	-0.2439635
195.4	0.6983795	195.4	0.66036	195.4	0.7100583	195.4	0.6828134	195.4	0.6565137	195.4	0.6965777	195.4	0.7329454	195.4	-0.2522503	195.4	-0.2713382	195.4	-0.2872224	195.4	-0.2389615	195.4	-0.2189326	195.4	-0.2391683	195.4	-0.2074533	195.4	-0.1957461	195.4	-0.2438953
195.6	0.6986626	195.6	0.6629648	195.6	0.7132589	195.6	0.6851233	195.6	0.6554077	195.6	0.6931756	195.6	0.7342432	195.6	-0.2509269	195.6	-0.2709483	195.6	-0.2839405	195.6	-0.239073	195.6	-0.2186088	195.6	-0.2356262	195.6	-0.2033906	195.6	-0.1954756	195.6	-0.2455275
195.8	0.701615	195.8	0.6611262	195.8	0.7152452	195.8	0.6872687	195.8	0.654304	195.8	0.6949018	195.8	0.7331678	195.8	-0.2501619	195.8	-0.2679458	195.8	-0.2875013	195.8	-0.2384945	195.8	-0.2192601	195.8	-0.2350965	195.8	-0.2064388	195.8	-0.1923809	195.8	-0.240232
196	0.7005557	196	0.6624928	196	0.716157	196	0.6853755	196	0.6622368	196	0.6980923	196	0.7378304	196	-0.2497337	196	-0.2720594	196	-0.2880116	196	-0.2399286	196	-0.2180606	196	-0.2338072	196	-0.2051172	196	-0.1924157	196	-0.2451365
196.2	0.7008101	196.2	0.6665983	196.2	0.7147985	196.2	0.6886206	196.2	0.6595528	196.2	0.707611	196.2	0.7383484	196.2	-0.2533281	196.2	-0.27239	196.2	-0.2888368	196.2	-0.2404872	196.2	-0.2218443	196.2	-0.2377674	196.2	-0.2053496	196.2	-0.1951458	196.2	-0.2408386
196.4	0.7026935	196.4	0.6671088	196.4	0.71469	196.4	0.6915554	196.4	0.6636693	196.4	0.703557	196.4	0.7409092	196.4	-0.2531068	196.4	-0.2675401	196.4	-0.2901258	196.4	-0.2406567	196.4	-0.2179788	196.4	-0.23444	196.4	-0.2019479	196.4	-0.1952471	196.4	-0.2476777
196.6	0.7062321	196.6	0.6769782	196.6	0.7178152	196.6	0.6950689	196.6	0.6677383	196.6	0.7054284	196.6	0.7405894	196.6	-0.2493543	196.6	-0.2689908	196.6	-0.2879631	196.6	-0.2397026	196.6	-0.2191741	196.6	-0.2368706	196.6	-0.2061609	196.6	-0.1918369	196.6	-0.2449511
196.8	0.7035546	196.8	0.6695322	196.8	0.7207093	196.8	0.6979122	196.8	0.6670943	196.8	0.7063905	196.8	0.7378123	196.8	-0.2504419	196.8	-0.2687106	196.8	-0.2845512	196.8	-0.2348535	196.8	-0.2151647	196.8	-0.2385165	196.8	-0.2056614	196.8	-0.1977703	196.8	-0.2439593
197	0.703966	197	0.6745418	197	0.7244328	197	0.6978797	197	0.6650233	197	0.7087563	197	0.7438743	197	-0.2473798	197	-0.2670365	197	-0.2877119	197	-0.2375038	197	-0.2176111	197	-0.2289454	197	-0.2058958	197	-0.1967076	197	-0.2449871
197.2	0.7114403	197.2	0.6699521	197.2	0.7253622	197.2	0.6977136	197.2	0.6684234	197.2	0.7158918	197.2	0.7467794	197.2	-0.247713	197.2	-0.2712958	197.2	-0.290367	197.2	-0.2403675	197.2	-0.219126	197.2	-0.235597	197.2	-0.2022114	197.2	-0.198226	197.2	-0.2432436
197.4	0.7147642	197.4	0.6677749	197.4	0.7287961	197.4	0.6984126	197.4	0.6710818	197.4	0.7164502	197.4	0.7434251	197.4	-0.2478519	197.4	-0.2631371	197.4	-0.2873822	197.4	-0.2362988	197.4	-0.2173057	197.4	-0.2357157	197.4	-0.2042377	197.4	-0.1967343	197.4	-0.2438152
197.6	0.7174172	197.6	0.6802422	197.6	0.7282766	197.6	0.7043774	197.6	0.6705344	197.6	0.7161037	197.6	0.7492355	197.6	-0.2497976	197.6	-0.26716	197.6	-0.2876923	197.6	-0.2362061	197.6	-0.216728	197.6	-0.2346039	197.6	-0.2012328	197.6	-0.1929417	197.6	-0.2428836
197.8	0.7165292	197.8	0.683086	197.8	0.7327489	197.8	0.7010759	197.8	0.6721535	197.8	0.7161433	197.8	0.7537698	197.8	-0.246153	197.8	-0.2701115	197.8	-0.2861036	197.8	-0.2341172	197.8	-0.2156375	197.8	-0.2340904	197.8	-0.2056492	197.8	-0.2007641	197.8	-0.2441155
198	0.7155837	198	0.6822356	198	0.7362369	198	0.7053242	198	0.6771778	198	0.7179847	198	0.7516651	198	-0.245498	198	-0.269501	198	-0.2880392	198	-0.2370009	198	-0.213114	198	-0.2336742	198	-0.2040992	198	-0.1891178	198	-0.2436773
198.2	0.7215357	198.2	0.6814971	198.2	0.7349496	198.2	0.7085949	198.2	0.6759008	198.2	0.7231287	198.2	0.7553501	198.2	-0.2475533	198.2	-0.2673999	198.2	-0.2861536	198.2	-0.2361072	198.2	-0.2165651	198.2	-0.2355015	198.2	-0.2004	198.2	-0.1979536	198.2	-0.2426833
198.4	0.713926	198.4	0.6873449	198.4	0.7348483	198.4	0.7111174	198.4	0.6819686	198.4	0.7235367	198.4	0.7521354	198.4	-0.2493825	198.4	-0.2658225	198.4	-0.2892497	198.4	-0.2380288	198.4	-0.2138325	198.4	-0.237145	198.4	-0.2035859	198.4	-0.1884823	198.4	-0.2441077
198.6	0.721823	198.6	0.6863488	198.6	0.7365339	198.6	0.7163269	198.6	0.6809134	198.6	0.7236831	198.6	0.7575995	198.6	-0.2475666	198.6	-0.2686704	198.6	-0.2857927	198.6	-0.2390394	198.6	-0.2184927	198.6	-0.2307685	198.6	-0.2042371	198.6	-0.1958214	198.6	-0.2420453
198.8	0.7278741	198.8	0.6875598	198.8	0.7359508	198.8	0.7083686	198.8	0.6815643	198.8	0.7254399	198.8	0.7635794	198.8	-0.2464573	198.8	-0.2689376	198.8	-0.2848666	198.8	-0.2333672	198.8	-0.2124971	198.8	-0.2337146	198.8	-0.2034098	198.8	-0.1940407	198.8	-0.2420257
199	0.7246109	199	0.692913	199	0.7368484	199	0.7197986	199	0.6863363	199	0.7290912	199	0.7598808	199	-0.2430608	199	-0.2641957	199	-0.2875457	199	-0.235864	199	-0.2171915	199	-0.2290971	199	-0.1947545	199	-0.1976157	199	-0.2382992
199.2	0.7261056	199.2	0.6936196	199.2	0.7418025	199.2	0.7179854	199.2	0.6801288	199.2	0.727913	199.2	0.7591079	199.2	-0.2482062	199.2	-0.2670169	199.2	-0.2838716	199.2	-0.2365159	199.2	-0.2131734	199.2	-0.2341154	199.2	-0.2012065	199.2	-0.1960334	199.2	-0.2460406
199.4	0.7271699	199.4	0.6967571	199.4	0.7423652	199.4	0.7186247	199.4	0.6871624	199.4	0.7238121	199.4	0.7617996	199.4	-0.2482014	199.4	-0.2701772	199.4	-0.2828796	199.4	-0.238668	199.4	-0.2142333	199.4	-0.2332597	199.4	-0.1993961	199.4	-0.1915401	199.4	-0.2428401
199.6	0.7337483	199.6	0.7000137	199.6	0.7428756	199.6	0.7223839	199.6	0.6884584	199.6	0.7259856	199.6	0.7640225	199.6	-0.2465627	199.6	-0.2657392	199.6	-0.2873063	199.6	-0.2398558	199.6	-0.2148708	199.6	-0.2357444	199.6	-0.2029817	199.6	-0.1930749	199.6	-0.2385423
199.8	0.7317804	199.8	0.695677	199.8	0.7459881	199.8	0.7180811	199.8	0.6872253	199.8	0.7323434	199.8	0.7663085	199.8	-0.2481475	199.8	-0.265911	199.8	-0.2858778	199.8	-0.2311085	199.8	-0.2165793	199.8	-0.2308501	199.8	-0.195912	199.8	-0.1938121	199.8	-0.2446391
200	0.73168	200	0.7022211	200	0.7471759	200	0.7195031	200	0.6942695	200	0.734084	200	0.7672466	200	-0.2466605	200	-0.2661057	200	-0.2849255	200	-0.2345476	200	-0.2151571	200	-0.2356332	200	-0.2066383	200	-0.1908826	200	-0.2424459
200.2	0.737299	200.2	0.7011175	200.2	0.7502794	200.2	0.7241693	200.2	0.6952307	200.2	0.7350016	200.2	0.7728355	200.2	-0.2468256	200.2	-0.2670013	200.2	-0.2836988	200.2	-0.2369855	200.2	-0.2161489	200.2	-0.2301606	200.2	-0.1991328	200.2	-0.1899904	200.2	-0.2399027
200.4	0.7382177	200.4	0.7028558	200.4	0.7478434	200.4	0.7270091	200.4	0.6952061	200.4	0.7348941	200.4	0.773329	200.4	-0.2478103	200.4	-0.2691978	200.4	-0.2828828	200.4	-0.2344894	200.4	-0.2131797	200.4	-0.2309493	200.4	-0.199973	200.4	-0.1892289	200.4	-0.241396
200.6	0.7374154	200.6	0.7042133	200.6	0.754704	200.6	0.7265254	200.6	0.6924337	200.6	0.7392887	200.6	0.7718062	200.6	-0.2485388	200.6	-0.2644717	200.6	-0.2846689	200.6	-0.2381593	200.6	-0.2140545	200.6	-0.2333333	200.6	-0.1978036	200.6	-0.1943767	200.6	-0.2380511
200.8	0.737451	200.8	0.7056568	200.8	0.7497	200.8	0.729799	200.8	0.7014204	200.8	0.7360445	200.8	0.7717078	200.8	-0.2500222	200.8	-0.2661085	200.8	-0.2828886	200.8	-0.2351373	200.8	-0.2094495	200.8	-0.2319206	200.8	-0.1979555	200.8	-0.1916277	200.8	-0.2411669
201	0.7402846	201	0.7046165	201	0.7517529	201	0.7286677	201	0.6969491	201	0.7391334	201	0.7783483	201	-0.2459151	201	-0.2666584	201	-0.2809184	201	-0.2328043	201	-0.2153687	201	-0.2325356	201	-0.1984979	201	-0.1935555	201	-0.2405579
201.2	0.7423368	201.2	0.7084829	201.2	0.7542665	201.2	0.7270178	201.2	0.7030499	201.2	0.7422181	201.2	0.7824767	201.2	-0.2454185	201.2	-0.2698191	201.2	-0.2822418	201.2	-0.2392512	201.2	-0.2133337	201.2	-0.2314772	201.2	-0.2013173	201.2	-0.1882692	201.2	-0.2373005
201.4	0.7449211	201.4	0.7112308	201.4	0.7601776	201.4	0.7296585	201.4	0.7028142	201.4	0.7429276	201.4	0.7777251	201.4	-0.2454145	201.4	-0.2693958	201.4	-0.2844481	201.4	-0.2328453	201.4	-0.2083864	201.4	-0.2296911	201.4	-0.200577	201.4	-0.1896463	201.4	-0.238982
201.6	0.7420277	201.6	0.7119058	201.6	0.7578202	201.6	0.7355884	201.6	0.7036751	201.6	0.7485915	201.6	0.7820049	201.6	-0.243657	201.6	-0.2645584	201.6	-0.2884303	201.6	-0.2318421	201.6	-0.2147259	201.6	-0.2288937	201.6	-0.1975666	201.6	-0.1879427	201.6	-0.2383586
201.8	0.7477372	201.8	0.7178577	201.8	0.7589778	201.8	0.736114	201.8	0.705884	201.8	0.7457148	201.8	0.7849642	201.8	-0.2456885	201.8	-0.2736715	201.8	-0.2861079	201.8	-0.2372674	201.8	-0.2137822	201.8	-0.2311229	201.8	-0.1994989	201.8	-0.1870492	201.8	-0.2423823
202	0.7433221	202	0.7167686	202	0.7641768	202	0.738068	202	0.7116792	202	0.7489029	202	0.7864344	202	-0.2485349	202	-0.2679945	202	-0.2867074	202	-0.2341677	202	-0.2129625	202	-0.2308082	202	-0.1981968	202	-0.18719	202	-0.2376474
202.2	0.7457721	202.2	0.7197987	202.2	0.765066	202.2	0.7404914	202.2	0.7088872	202.2	0.7485736	202.2	0.7866006	202.2	-0.243023	202.2	-0.2640207	202.2	-0.2840762	202.2	-0.2331432	202.2	-0.2118585	202.2	-0.2292867	202.2	-0.200267	202.2	-0.1916492	202.2	-0.2384261
202.4	0.7558392	202.4	0.7164049	202.4	0.7685385	202.4	0.742188	202.4	0.7085367	202.4	0.7518182	202.4	0.7859657	202.4	-0.2439069	202.4	-0.2627715	202.4	-0.2794524	202.4	-0.2326592	202.4	-0.2116126	202.4	-0.2298422	202.4	-0.1970325	202.4	-0.1879537	202.4	-0.2404169
202.6	0.7510232	202.6	0.7210944	202.6	0.7687795	202.6	0.74538	202.6	0.7111221	202.6	0.7516954	202.6	0.7895344	202.6	-0.2417314	202.6	-0.2621141	202.6	-0.2846552	202.6	-0.2326887	202.6	-0.2083082	202.6	-0.2283819	202.6	-0.1993094	202.6	-0.1893139	202.6	-0.2384989
202.8	0.7516086	202.8	0.7255625	202.8	0.7682421	202.8	0.7476271	202.8	0.713125	202.8	0.7557638	202.8	0.7932921	202.8	-0.2427666	202.8	-0.2656885	202.8	-0.278927	202.8	-0.2339674	202.8	-0.2123268	202.8	-0.229046	202.8	-0.1967093	202.8	-0.1848999	202.8	-0.2401304
203	0.752535	203	0.7209231	203	0.7698656	203	0.742329	203	0.7137623	203	0.755658	203	0.7960744	203	-0.2459218	203	-0.2701014	203	-0.279716	203	-0.230847	203	-0.2107571	203	-0.227488	203	-0.1946926	203	-0.1930257	203	-0.2407046
203.2	0.7565908	203.2	0.7232671	203.2	0.7738877	203.2	0.7490624	203.2	0.7175739	203.2	0.7587019	203.2	0.7925326	203.2	-0.2438635	203.2	-0.2656088	203.2	-0.2785607	203.2	-0.2344927	203.2	-0.2136	203.2	-0.2254671	203.2	-0.1985077	203.2	-0.189753	203.2	-0.2379085
203.4	0.7588004	203.4	0.7289811	203.4	0.7754444	203.4	0.7555171	203.4	0.7160864	203.4	0.7601093	203.4	0.7965307	203.4	-0.2454387	203.4	-0.2660099	203.4	-0.278542	203.4	-0.2372424	203.4	-0.2116751	203.4	-0.2288594	203.4	-0.1934986	203.4	-0.189594	203.4	-0.238239
203.6	0.7642152	203.6	0.7270476	203.6	0.7738149	203.6	0.7477331	203.6	0.7188437	203.6	0.7631088	203.6	0.7946728	203.6	-0.2417589	203.6	-0.2664896	203.6	-0.2799562	203.6	-0.2332944	203.6	-0.2123345	203.6	-0.2288182	203.6	-0.1984466	203.6	-0.1892373	203.6	-0.2417391
203.8	0.7606247	203.8	0.7262179	203.8	0.7746471	203.8	0.7527779	203.8	0.7157638	203.8	0.7614369	203.8	0.8006517	203.8	-0.2433576	203.8	-0.264164	203.8	-0.2785232	203.8	-0.2317891	203.8	-0.2134353	203.8	-0.2273469	203.8	-0.1972205	203.8	-0.1889339	203.8	-0.2456718
204	0.7610586	204	0.7288163	204	0.7742789	204	0.7541746	204	0.7206097	204	0.7609202	204	0.7984053	204	-0.2417997	204	-0.2642979	204	-0.2779888	204	-0.2333015	204	-0.2092505	204	-0.2287481	204	-0.1940399	204	-0.188103	204	-0.2387215
204.2	0.766134	204.2	0.7373226	204.2	0.7812403	204.2	0.755316	204.2	0.7237716	204.2	0.7647676	204.2	0.7963066	204.2	-0.2425759	204.2	-0.2588176	204.2	-0.2792635	204.2	-0.2335056	204.2	-0.2090366	204.2	-0.2272208	204.2	-0.19768	204.2	-0.1929521	204.2	-0.2442966
204.41	0.7674684	204.41	0.7311134	204.41	0.7803554	204.41	0.7566367	204.41	0.7264671	204.41	0.7675993	204.41	0.800776	204.41	-0.2468629	204.4	-0.2618942	204.4	-0.2778988	204.4	-0.2316635	204.4	-0.2126463	204.4	-0.2254701	204.4	-0.1980793	204.4	-0.1863827	204.4	-0.2393076
204.6	0.7656347	204.6	0.73576	204.6	0.7847846	204.6	0.7637972	204.6	0.7267457	204.6	0.7715445	204.6	0.7973454	204.6	-0.2439492	204.6	-0.2655956	204.6	-0.2778479	204.6	-0.2347388	204.6	-0.2070111	204.6	-0.2258075	204.6	-0.1964682	204.6	-0.1884107	204.6	-0.2340713
204.8	0.7665887	204.8	0.7364647	204.8	0.7849303	204.8	0.7626299	204.8	0.7281453	204.8	0.7727384	204.8	0.8054953	204.8	-0.2404018	204.8	-0.2636329	204.8	-0.2771673	204.8	-0.2325271	204.8	-0.2083925	204.8	-0.2276093	204.8	-0.1944413	204.8	-0.1901392	204.8	-0.235483
205	0.7692846	205	0.732857	205	0.7862407	205	0.7621943	205	0.7262369	205	0.7721041	205	0.802914	205	-0.2435268	205	-0.2659495	205	-0.2819595	205	-0.2319628	205	-0.2103476	205	-0.2256177	205	-0.1964602	205	-0.1861689	205	-0.2375431
205.2	0.7731121	205.2	0.7390025	205.2	0.7887769	205.2	0.7642265	205.2	0.7308986	205.2	0.772105	205.2	0.8071887	205.2	-0.2446037	205.2	-0.2569264	205.2	-0.2823116	205.2	-0.2264739	205.2	-0.2095708	205.2	-0.2307726	205.2	-0.1948639	205.2	-0.1874152	205.2	-0.2389393
205.41	0.7723023	205.41	0.7403009	205.41	0.7909953	205.41	0.760343	205.41	0.7303292	205.41	0.7754526	205.41	0.8087443	205.41	-0.2406415	205.4	-0.2597677	205.4	-0.2807446	205.4	-0.2276792	205.4	-0.20731	205.4	-0.2307531	205.4	-0.1959775	205.4	-0.1820281	205.4	-0.2362817
205.6	0.7728112	205.6	0.747983	205.6	0.7903002	205.6	0.7634512	205.6	0.7325413	205.6	0.7779096	205.6	0.8086098	205.6	-0.243638	205.6	-0.264353	205.6	-0.2775945	205.6	-0.2277665	205.6	-0.2084974	205.6	-0.2247228	205.6	-0.1954854	205.6	-0.1871768	205.6	-0.2405017
205.8	0.7781099	205.8	0.7392411	205.8	0.7935078	205.8	0.7631695	205.8	0.7341875	205.8	0.7749685	205.8	0.8103874	205.8	-0.2404868	205.8	-0.2680804	205.8	-0.279287	205.8	-0.2309065	205.8	-0.2065373	205.8	-0.2256723	205.8	-0.1951572	205.8	-0.184172	205.8	-0.2391509
206	0.7758534	206	0.7453065	206	0.7927418	206	0.7697778	206	0.7358948	206	0.7761403	206	0.8163022	206	-0.2395379	206	-0.2603201	206	-0.2764869	206	-0.2313555	206	-0.2078246	206	-0.2299668	206	-0.1961989	206	-0.1898193	206	-0.2422215
206.2	0.7808831	206.2	0.7449668	206.2	0.7922487	206.2	0.7665403	206.2	0.7456449	206.2	0.7812269	206.2	0.8149242	206.2	-0.2439577	206.2	-0.2622528	206.2	-0.2785052	206.2	-0.2306022	206.2	-0.2078391	206.2	-0.2262847	206.2	-0.197109	206.2	-0.1908753	206.2	-0.2379087
206.4	0.7796874	206.4	0.7426976	206.4	0.7962434	206.4	0.7692488	206.4	0.7376491	206.4	0.7817	206.4	0.812626	206.4	-0.2399927	206.4	-0.2571046	206.4	-0.2724366	206.4	-0.2239379	206.4	-0.2108154	206.4	-0.2257263	206.4	-0.1954746	206.4	-0.1869093	206.4	-0.2369201
206.6	0.7819245	206.6	0.7469071	206.6	0.7964211	206.6	0.7753454	206.6	0.7403814	206.6	0.7813541	206.6	0.8216315	206.6	-0.2434124	206.6	-0.2617998	206.6	-0.2779009	206.6	-0.2323293	206.6	-0.210012	206.6	-0.2265133	206.6	-0.196456	206.6	-0.1834646	206.6	-0.2335995
206.8	0.7825505	206.8	0.7505201	206.8	0.7983889	206.8	0.7729191	206.8	0.7379523	206.8	0.7840523	206.8	0.8204707	206.8	-0.2457087	206.8	-0.2593653	206.8	-0.2771916	206.8	-0.2267895	206.8	-0.2119604	206.8	-0.2275217	206.8	-0.1944997	206.8	-0.1876283	206.8	-0.2402342
207	0.783023	207	0.751025	207	0.804204	207	0.7752613	207	0.7431715	207	0.7865661	207	0.8224544	207	-0.2439204	207	-0.2615311	207	-0.2795236	207	-0.2244828	207	-0.2089297	207	-0.2239021	207	-0.1950274	207	-0.1821556	207	-0.2295693
207.2	0.7862375	207.2	0.7584099	207.2	0.8007421	207.2	0.7745611	207.2	0.7476516	207.2	0.7871795	207.2	0.8213093	207.2	-0.2385816	207.2	-0.2581464	207.2	-0.276816	207.2	-0.228675	207.2	-0.2070266	207.2	-0.2311049	207.2	-0.1915389	207.2	-0.1825815	207.2	-0.2321001
207.4	0.7848548	207.4	0.7559147	207.4	0.8029878	207.4	0.7815806	207.4	0.748279	207.4	0.7919306	207.4	0.8265393	207.4	-0.2353741	207.4	-0.2607301	207.4	-0.2777745	207.4	-0.2281609	207.4	-0.2104209	207.4	-0.2269274	207.4	-0.1970582	207.4	-0.1864505	207.4	-0.236399
207.6	0.7851906	207.6	0.7524238	207.6	0.8052841	207.6	0.7776656	207.6	0.7440201	207.6	0.784471	207.6	0.8235934	207.6	-0.2373653	207.6	-0.2612759	207.6	-0.2767989	207.6	-0.2289641	207.6	-0.2051082	207.6	-0.22386	207.6	-0.1926825	207.6	-0.1873397	207.6	-0.2364281
207.8	0.7922532	207.8	0.7556188	207.8	0.8037578	207.8	0.7822749	207.8	0.7494768	207.8	0.7951933	207.8	0.8300775	207.8	-0.2371613	207.8	-0.2565937	207.8	-0.2739943	207.8	-0.2267819	207.8	-0.2066503	207.8	-0.2248608	207.8	-0.1940302	207.8	-0.1836725	207.8	-0.2404006
208	0.7889594	208	0.7540682	208	0.80387	208	0.7791525	208	0.7466556	208	0.7920159	208	0.8323041	208	-0.2426268	208	-0.254869	208	-0.278998	208	-0.2276886	208	-0.2067201	208	-0.2249847	208	-0.1924408	208	-0.1828801	208	-0.2344528
208.2	0.7873651	208.2	0.7561287	208.2	0.8104632	208.2	0.7765455	208.2	0.7528312	208.2	0.7960411	208.2	0.8296775	208.2	-0.2402328	208.2	-0.259557	208.2	-0.2795903	208.2	-0.2316716	208.2	-0.2100237	208.2	-0.2233121	208.2	-0.1917838	208.2	-0.1879291	208.2	-0.2362269
208.4	0.796975	208.4	0.7614695	208.4	0.8112749	208.4	0.7857711	208.4	0.753768	208.4	0.7955479	208.4	0.8307941	208.4	-0.2426675	208.4	-0.2646647	208.4	-0.2728316	208.4	-0.228456	208.4	-0.2053138	208.4	-0.2242946	208.4	-0.1928681	208.4	-0.1883717	208.4	-0.2374134
208.6	0.7948914	208.6	0.7644411	208.6	0.8095647	208.6	0.7809508	208.6	0.757494	208.6	0.7984872	208.6	0.8333043	208.6	-0.2393778	208.6	-0.2581103	208.6	-0.2773232	208.6	-0.2287233	208.6	-0.2072355	208.6	-0.2231264	208.6	-0.1935852	208.6	-0.1832176	208.6	-0.2343468
208.8	0.7996803	208.8	0.7651497	208.8	0.8107381	208.8	0.7901498	208.8	0.7508328	208.8	0.7994837	208.8	0.8319384	208.8	-0.2419256	208.8	-0.2580274	208.8	-0.2720353	208.8	-0.2266874	208.8	-0.2043955	208.8	-0.2285649	208.8	-0.1914421	208.8	-0.1818852	208.8	-0.2354279
209	0.7980375	209	0.7643069	209	0.8155131	209	0.7894877	209	0.751825	209	0.8031005	209	0.8322689	209	-0.2427998	209	-0.2571235	209	-0.2764194	209	-0.2317953	209	-0.2075759	209	-0.2243138	209	-0.1946509	209	-0.1888732	209	-0.2374329
209.2	0.798858	209.2	0.7641735	209.2	0.814854	209.2	0.7824313	209.2	0.7571282	209.2	0.7996134	209.2	0.8359675	209.2	-0.2382614	209.2	-0.2604268	209.2	-0.2747569	209.2	-0.2297226	209.2	-0.205519	209.2	-0.2278821	209.2	-0.1969562	209.2	-0.1806791	209.2	-0.2356467
209.4	0.8047137	209.4	0.7733517	209.4	0.8199925	209.4	0.7894859	209.4	0.7575346	209.4	0.804827	209.4	0.8344808	209.4	-0.2396051	209.4	-0.2583299	209.4	-0.2733342	209.4	-0.2280594	209.4	-0.2084581	209.4	-0.2289991	209.4	-0.1896578	209.4	-0.1825587	209.4	-0.2323225
209.6	0.7978226	209.6	0.7679645	209.6	0.8188047	209.6	0.7917476	209.6	0.7604492	209.6	0.8034176	209.6	0.8365298	209.6	-0.2369201	209.6	-0.2556262	209.6	-0.2747277	209.6	-0.2252917	209.6	-0.2075912	209.6	-0.2191209	209.6	-0.1897913	209.6	-0.1868653	209.6	-0.2345299
209.8	0.8025941	209.8	0.7661388	209.8	0.8140157	209.8	0.7925546	209.8	0.7620423	209.8	0.805303	209.8	0.838355	209.8	-0.2376689	209.8	-0.2604521	209.8	-0.2778649	209.8	-0.2287559	209.8	-0.2048045	209.8	-0.2264049	209.8	-0.1909712	209.8	-0.1820046	209.8	-0.2320856
210	0.8075615	210	0.7726619	210	0.8215915	210	0.795646	210	0.7615449	210	0.8095165	210	0.8387825	210	-0.2406636	210	-0.2550109	210	-0.2735622	210	-0.2281659	210	-0.2061758	210	-0.2182573	210	-0.1966093	210	-0.1823808	210	-0.2378944
210.2	0.8099642	210.2	0.7751019	210.2	0.8222488	210.2	0.7939392	210.2	0.7657414	210.2	0.8029855	210.2	0.838693	210.2	-0.2377228	210.2	-0.2546781	210.2	-0.2747318	210.2	-0.2258662	210.2	-0.2053094	210.2	-0.2220134	210.2	-0.1914702	210.2	-0.1809756	210.2	-0.2305937
210.4	0.8078244	210.4	0.7746696	210.4	0.8230956	210.4	0.8009335	210.4	0.7657207	210.4	0.8075677	210.4	0.8448607	210.4	-0.2387642	210.4	-0.2544917	210.4	-0.2774941	210.4	-0.2279712	210.4	-0.2035611	210.4	-0.2248762	210.4	-0.1869467	210.4	-0.1812102	210.4	-0.2362365
210.6	0.8076297	210.6	0.774505	210.6	0.8225229	210.6	0.8028954	210.6	0.7726276	210.6	0.8082934	210.6	0.846661	210.6	-0.2410505	210.6	-0.2576512	210.6	-0.2734592	210.6	-0.2266366	210.6	-0.2057373	210.6	-0.2178795	210.6	-0.1932075	210.6	-0.1879827	210.6	-0.2297752
210.8	0.8100685	210.8	0.778104	210.8	0.8215323	210.8	0.7958191	210.8	0.7702318	210.8	0.8125831	210.8	0.8462115	210.8	-0.2362429	210.8	-0.25986	210.8	-0.2769135	210.8	-0.2263989	210.8	-0.2024098	210.8	-0.2255859	210.8	-0.1882976	210.8	-0.184822	210.8	-0.2314973
211	0.8118424	211	0.778283	211	0.8246612	211	0.8004869	211	0.7662498	211	0.8126985	211	0.8450686	211	-0.2342943	211	-0.2590492	211	-0.2774513	211	-0.2295794	211	-0.1998851	211	-0.2197343	211	-0.1938251	211	-0.1835126	211	-0.2306116
211.2	0.8063779	211.2	0.7784798	211.2	0.8263649	211.2	0.804785	211.2	0.7682304	211.2	0.8155465	211.2	0.8474076	211.2	-0.2349903	211.2	-0.2552679	211.2	-0.270613	211.2	-0.2221287	211.2	-0.2058272	211.2	-0.2199791	211.2	-0.1892063	211.2	-0.1840797	211.2	-0.2372635
211.4	0.8160457	211.4	0.778777	211.4	0.8283535	211.4	0.8052003	211.4	0.7739068	211.4	0.8142895	211.4	0.8499526	211.4	-0.2340376	211.4	-0.2591416	211.4	-0.2751481	211.4	-0.2256607	211.4	-0.2035266	211.4	-0.2219275	211.4	-0.1925119	211.4	-0.1859063	211.4	-0.2368655
211.6	0.8150145	211.6	0.7793479	211.6	0.8300008	211.6	0.8049079	211.6	0.77107	211.6	0.8174852	211.6	0.8501667	211.6	-0.2362136	211.6	-0.2557298	211.6	-0.2716802	211.6	-0.2280798	211.6	-0.2021121	211.6	-0.2202313	211.6	-0.1868211	211.6	-0.1826564	211.6	-0.2345625
211.8	0.8123989	211.8	0.7845248	211.8	0.8329343	211.8	0.8078998	211.8	0.7778327	211.8	0.8183197	211.8	0.8501035	211.8	-0.2359591	211.8	-0.2549219	211.8	-0.2737578	211.8	-0.2259002	211.8	-0.201351	211.8	-0.2177275	211.8	-0.1897327	211.8	-0.1820852	211.8	-0.237782
212	0.8180569	212	0.7865836	212	0.8270915	212	0.8073547	212	0.7752903	212	0.8181185	212	0.8520309	212	-0.234505	212	-0.2605283	212	-0.272058	212	-0.2235053	212	-0.2065525	212	-0.2234919	212	-0.1856998	212	-0.1793651	212	-0.2322666
212.2	0.8168344	212.2	0.7843668	212.2	0.830465	212.2	0.8086845	212.2	0.7760099	212.2	0.8209003	212.2	0.8576668	212.2	-0.2349428	212.2	-0.2566012	212.2	-0.2742913	212.2	-0.224441	212.2	-0.2013945	212.2	-0.2189322	212.2	-0.1886992	212.2	-0.1793389	212.2	-0.2335709
212.4	0.8212458	212.4	0.7892669	212.4	0.8339787	212.4	0.8124161	212.4	0.7756608	212.4	0.8209395	212.4	0.853444	212.4	-0.2397799	212.4	-0.2520681	212.4	-0.2713073	212.4	-0.2242393	212.4	-0.2030508	212.4	-0.2202238	212.4	-0.1908762	212.4	-0.1829616	212.4	-0.230245
212.6	0.8204247	212.6	0.7884632	212.6	0.8348243	212.6	0.8103604	212.6	0.7784507	212.6	0.8201892	212.6	0.8510193	212.6	-0.2381444	212.6	-0.2572125	212.6	-0.269915	212.6	-0.2241937	212.6	-0.2002088	212.6	-0.2210222	212.6	-0.1865093	212.6	-0.1833522	212.6	-0.2354832
212.8	0.8238436	212.8	0.7904571	212.8	0.8345833	212.8	0.8150599	212.8	0.7843826	212.8	0.8218804	212.8	0.8580488	212.8	-0.2337426	212.8	-0.2549722	212.8	-0.271073	212.8	-0.2226954	212.8	-0.2020162	212.8	-0.2224901	212.8	-0.1859065	212.8	-0.1782507	212.8	-0.2330654
213	0.8230906	213	0.7944543	213	0.8401462	213	0.816764	213	0.7799841	213	0.8242979	213	0.8582536	213	-0.234604	213	-0.2508915	213	-0.2721583	213	-0.2217638	213	-0.2016901	213	-0.2199412	213	-0.1899422	213	-0.1821852	213	-0.2317414
213.2	0.8221595	213.2	0.7889226	213.2	0.8398244	213.2	0.8167125	213.2	0.7829724	213.2	0.8284439	213.2	0.8600796	213.2	-0.2406612	213.2	-0.252831	213.2	-0.2728431	213.2	-0.2271256	213.2	-0.1993933	213.2	-0.2199076	213.2	-0.1918238	213.2	-0.1813603	213.2	-0.2328302
213.4	0.8283116	213.4	0.7895327	213.4	0.8424142	213.4	0.8127708	213.4	0.7865343	213.4	0.8266862	213.4	0.859638	213.4	-0.234723	213.4	-0.2545328	213.4	-0.2721744	213.4	-0.2231982	213.4	-0.2033338	213.4	-0.2232727	213.4	-0.190597	213.4	-0.1814371	213.4	-0.2297323
213.6	0.8291091	213.6	0.7928765	213.6	0.8411697	213.6	0.8150569	213.6	0.7896163	213.6	0.8282461	213.6	0.8630499	213.6	-0.2365513	213.6	-0.251461	213.6	-0.2705202	213.6	-0.2238959	213.6	-0.2028424	213.6	-0.2197378	213.6	-0.1856088	213.6	-0.1786547	213.6	-0.2286125
213.8	0.8233458	213.8	0.7970448	213.8	0.8392466	213.8	0.8177331	213.8	0.7853897	213.8	0.8246442	213.8	0.8592881	213.8	-0.2335589	213.8	-0.2559021	213.8	-0.2735257	213.8	-0.2219895	213.8	-0.2012902	213.8	-0.2163323	213.8	-0.1861754	213.8	-0.1789368	213.8	-0.2323821
214	0.8261402	214	0.7889614	214	0.8459585	214	0.8191808	214	0.7879261	214	0.8282384	214	0.8661203	214	-0.2362387	214	-0.2539549	214	-0.2706352	214	-0.2192021	214	-0.2024649	214	-0.2238768	214	-0.190331	214	-0.1795119	214	-0.23507
214.2	0.8315632	214.2	0.7957487	214.2	0.8470246	214.2	0.8226004	214.2	0.7916745	214.2	0.8283982	214.2	0.8640828	214.2	-0.2374892	214.2	-0.2542561	214.2	-0.2699412	214.2	-0.2217954	214.2	-0.2014192	214.2	-0.2218386	214.2	-0.190587	214.2	-0.1815159	214.2	-0.2287076
214.4	0.8291555	214.4	0.7962909	214.4	0.8470844	214.4	0.8214129	214.4	0.7921751	214.4	0.8312313	214.4	0.8692053	214.4	-0.2343968	214.4	-0.2542593	214.4	-0.2726536	214.4	-0.2238873	214.4	-0.2030864	214.4	-0.2197544	214.4	-0.1855369	214.4	-0.1753794	214.4	-0.2290539
214.6	0.8336427	214.6	0.8048486	214.6	0.8518544	214.6	0.8232018	214.6	0.7948355	214.6	0.8336109	214.6	0.8707372	214.6	-0.2339523	214.6	-0.2518819	214.6	-0.270872	214.6	-0.2268435	214.6	-0.1982696	214.6	-0.219784	214.6	-0.1850054	214.6	-0.18204	214.6	-0.2281445
214.8	0.834291	214.8	0.7964678	214.8	0.8461416	214.8	0.8278825	214.8	0.7928173	214.8	0.8367512	214.8	0.8702629	214.8	-0.2330911	214.8	-0.2508218	214.8	-0.27093	214.8	-0.21983	214.8	-0.2064655	214.8	-0.2220465	214.8	-0.1911287	214.8	-0.175341	214.8	-0.2330832
215.02	0.8328264	215.02	0.8023681	215.02	0.8519692	215.02	0.8232297	215.02	0.795722	215.02	0.8353881	215.02	0.8711264	215.02	-0.2374747	215	-0.2548598	215	-0.2763225	215	-0.2215706	215	-0.1988137	215	-0.2199719	215	-0.1864322	215	-0.1796273	215	-0.2285792
215.2	0.8325803	215.2	0.7977734	215.2	0.8495809	215.2	0.8265036	215.2	0.7927425	215.2	0.8399193	215.2	0.875068	215.2	-0.2320104	215.2	-0.2517149	215.2	-0.2676684	215.2	-0.2247724	215.2	-0.1990301	215.2	-0.2144663	215.2	-0.1907465	215.2	-0.1797882	215.2	-0.2242996
215.4	0.8391877	215.4	0.8058233	215.4	0.8474481	215.4	0.8328815	215.4	0.8007824	215.4	0.8425686	215.4	0.8751146	215.4	-0.2344282	215.4	-0.2511016	215.4	-0.269119	215.4	-0.2203938	215.4	-0.1990926	215.4	-0.216563	215.4	-0.1858336	215.4	-0.1796554	215.4	-0.231471
215.6	0.8400294	215.6	0.8060144	215.6	0.8504137	215.6	0.8336862	215.6	0.7989752	215.6	0.8386768	215.6	0.874316	215.6	-0.2322965	215.6	-0.2546644	215.6	-0.2682916	215.6	-0.2235966	215.6	-0.2012996	215.6	-0.2199599	215.6	-0.1920183	215.6	-0.171786	215.6	-0.2288007
215.8	0.8419909	215.8	0.8095877	215.8	0.8593218	215.8	0.8277476	215.8	0.7971919	215.8	0.8454975	215.8	0.8791801	215.8	-0.2311822	215.8	-0.2534672	215.8	-0.2726467	215.8	-0.2236085	215.8	-0.198279	215.8	-0.2178977	215.8	-0.1852426	215.8	-0.1792321	215.8	-0.2270437
216	0.8457611	216	0.810798	216	0.8517985	216	0.8344581	216	0.7983705	216	0.8443372	216	0.880226	216	-0.2307104	216	-0.2507882	216	-0.2730145	216	-0.2191661	216	-0.1982268	216	-0.2160854	216	-0.1875147	216	-0.1783409	216	-0.226903
216.2	0.8417271	216.2	0.8116945	216.2	0.8589065	216.2	0.8361223	216.2	0.802317	216.2	0.8438705	216.2	0.8799437	216.2	-0.2357689	216.2	-0.2543676	216.2	-0.2691317	216.2	-0.2222232	216.2	-0.199901	216.2	-0.2146805	216.2	-0.184498	216.2	-0.1799018	216.2	-0.2279616
216.4	0.84025	216.4	0.8111542	216.4	0.8588634	216.4	0.8351193	216.4	0.799884	216.4	0.8451694	216.4	0.879227	216.4	-0.2326055	216.4	-0.2519047	216.4	-0.2675569	216.4	-0.2162553	216.4	-0.1995758	216.4	-0.2184993	216.4	-0.1857873	216.4	-0.1768669	216.4	-0.2277406
216.6	0.8403118	216.6	0.8113253	216.6	0.858256	216.6	0.8338401	216.6	0.8034887	216.6	0.8455483	216.6	0.883145	216.6	-0.2335017	216.6	-0.2550072	216.6	-0.2680825	216.6	-0.2213753	216.6	-0.1976756	216.6	-0.2153916	216.6	-0.1878076	216.6	-0.1786808	216.6	-0.2315156
216.8	0.8442433	216.8	0.8150887	216.8	0.8615813	216.8	0.8335559	216.8	0.8062719	216.8	0.8506536	216.8	0.8785022	216.8	-0.2313563	216.8	-0.2523098	216.8	-0.2680524	216.8	-0.2193747	216.8	-0.2043982	216.8	-0.2140622	216.8	-0.1866288	216.8	-0.1749856	216.8	-0.2307054
217	0.8514234	217	0.8195809	217	0.8593098	217	0.8369371	217	0.8026565	217	0.8482488	217	0.880839	217	-0.2294281	217	-0.2485451	217	-0.2684252	217	-0.2213396	217	-0.1956337	217	-0.2195744	217	-0.1825825	217	-0.174619	217	-0.2264285
217.2	0.8471009	217.2	0.8144987	217.2	0.8627616	217.2	0.836065	217.2	0.806304	217.2	0.849053	217.2	0.8853844	217.2	-0.233583	217.2	-0.252566	217.2	-0.2671271	217.2	-0.2208055	217.2	-0.1949333	217.2	-0.2194931	217.2	-0.1853881	217.2	-0.1780881	217.2	-0.2310531
217.4	0.8488627	217.4	0.8195305	217.4	0.8614321	217.4	0.8389042	217.4	0.8060644	217.4	0.8500862	217.4	0.8803604	217.4	-0.2335645	217.4	-0.2537858	217.4	-0.2675156	217.4	-0.2210369	217.4	-0.1976166	217.4	-0.2147846	217.4	-0.1836738	217.4	-0.173785	217.4	-0.2288175
217.6	0.8533549	217.6	0.8172679	217.6	0.8598674	217.6	0.8427956	217.6	0.806662	217.6	0.8545204	217.6	0.8824179	217.6	-0.2315329	217.6	-0.2520667	217.6	-0.2677084	217.6	-0.216584	217.6	-0.1956007	217.6	-0.2153432	217.6	-0.187215	217.6	-0.1740086	217.6	-0.2275275
217.8	0.8505965	217.8	0.8184995	217.8	0.8673052	217.8	0.8403388	217.8	0.8103204	217.8	0.850215	217.8	0.8855015	217.8	-0.2298632	217.8	-0.2501053	217.8	-0.2638764	217.8	-0.2218494	217.8	-0.1999443	217.8	-0.2155993	217.8	-0.1847576	217.8	-0.1706177	217.8	-0.2327277
218	0.8534365	218	0.8205144	218	0.8700992	218	0.8437722	218	0.8098029	218	0.8550057	218	0.8872076	218	-0.2348567	218	-0.2499092	218	-0.2665521	218	-0.2182136	218	-0.1950068	218	-0.2150503	218	-0.1856144	218	-0.1780708	218	-0.2287119
218.2	0.8539193	218.2	0.8175395	218.2	0.8679612	218.2	0.8454043	218.2	0.8093655	218.2	0.8559656	218.2	0.8874965	218.2	-0.2304751	218.2	-0.2503804	218.2	-0.2664328	218.2	-0.2137751	218.2	-0.2013971	218.2	-0.21794	218.2	-0.188369	218.2	-0.1781939	218.2	-0.2232113
218.4	0.850297	218.4	0.8242922	218.4	0.868242	218.4	0.84962	218.4	0.810096	218.4	0.8604469	218.4	0.89296	218.4	-0.2313627	218.4	-0.2555469	218.4	-0.2685648	218.4	-0.217942	218.4	-0.1943146	218.4	-0.2158343	218.4	-0.1848568	218.4	-0.1763345	218.4	-0.2233703
218.6	0.8570417	218.6	0.8243245	218.6	0.8702265	218.6	0.8471281	218.6	0.8142384	218.6	0.8593058	218.6	0.8913411	218.6	-0.2343487	218.6	-0.2482892	218.6	-0.2665349	218.6	-0.216633	218.6	-0.1991627	218.6	-0.2176666	218.6	-0.1825777	218.6	-0.1771348	218.6	-0.2291481
218.8	0.8566493	218.8	0.8206994	218.8	0.8697209	218.8	0.846562	218.8	0.810294	218.8	0.8568299	218.8	0.8937491	218.8	-0.2314518	218.8	-0.2494324	218.8	-0.2681114	218.8	-0.2201889	218.8	-0.1974018	218.8	-0.2158863	218.8	-0.1823168	218.8	-0.1799789	218.8	-0.2298712
219	0.8584546	219	0.8247685	219	0.8745639	219	0.8455561	219	0.8177763	219	0.8604167	219	0.8970667	219	-0.2324482	219	-0.2479123	219	-0.2666397	219	-0.2175734	219	-0.1950468	219	-0.2137493	219	-0.1840951	219	-0.1753564	219	-0.2266793
219.2	0.8608137	219.2	0.8252841	219.2	0.8697924	219.2	0.850001	219.2	0.8162555	219.2	0.8619714	219.2	0.8964322	219.2	-0.2319022	219.2	-0.2488701	219.2	-0.2682372	219.2	-0.2174421	219.2	-0.1957114	219.2	-0.2149649	219.2	-0.1859802	219.2	-0.1776562	219.2	-0.2265877
219.4	0.8586619	219.4	0.8263361	219.4	0.8786542	219.4	0.8491348	219.4	0.8154594	219.4	0.8623385	219.4	0.8964716	219.4	-0.2351852	219.4	-0.2482928	219.4	-0.2666456	219.4	-0.2188247	219.4	-0.196869	219.4	-0.2145666	219.4	-0.1856393	219.4	-0.1720672	219.4	-0.2288831
219.6	0.8613135	219.6	0.828073	219.6	0.8729542	219.6	0.8484187	219.6	0.8207473	219.6	0.8619334	219.6	0.892656	219.6	-0.2297131	219.6	-0.2518157	219.6	-0.2669564	219.6	-0.217069	219.6	-0.1984881	219.6	-0.2148797	219.6	-0.1826136	219.6	-0.178825	219.6	-0.2225085
219.8	0.8586409	219.8	0.8261854	219.8	0.8743839	219.8	0.8573529	219.8	0.8166645	219.8	0.8669351	219.8	0.89733	219.8	-0.2294124	219.8	-0.2501932	219.8	-0.2690117	219.8	-0.2197787	219.8	-0.1960479	219.8	-0.2157888	219.8	-0.1830863	219.8	-0.1746194	219.8	-0.2272699
220	0.8614779	220	0.8311469	220	0.874854	220	0.8528717	220	0.8239685	220	0.8632625	220	0.9033182	220	-0.2316017	220	-0.2433288	220	-0.2650571	220	-0.2173036	220	-0.1968413	220	-0.212603	220	-0.1828502	220	-0.1745911	220	-0.2253349
220.2	0.8690889	220.2	0.8313739	220.2	0.8790662	220.2	0.8522452	220.2	0.8194119	220.2	0.8656098	220.2	0.9028234	220.2	-0.2288249	220.2	-0.2432657	220.2	-0.2641476	220.2	-0.2152454	220.2	-0.1910446	220.2	-0.2152643	220.2	-0.1825363	220.2	-0.1722391	220.2	-0.2292341
220.4	0.8627791	220.4	0.8324041	220.4	0.8809103	220.4	0.8560205	220.4	0.8247603	220.4	0.8690249	220.4	0.8997199	220.4	-0.2377528	220.4	-0.2501204	220.4	-0.2658359	220.4	-0.2168301	220.4	-0.1976504	220.4	-0.2123171	220.4	-0.1822511	220.4	-0.1739177	220.4	-0.2267731
220.6	0.8683466	220.6	0.8310008	220.6	0.8845587	220.6	0.8554299	220.6	0.8197689	220.6	0.8671704	220.6	0.9031793	220.6	-0.2257741	220.6	-0.2493503	220.6	-0.268314	220.6	-0.2119766	220.6	-0.1915404	220.6	-0.2151802	220.6	-0.1830191	220.6	-0.1703394	220.6	-0.2292091
220.8	0.8651209	220.8	0.8349454	220.8	0.8797299	220.8	0.8589357	220.8	0.8245503	220.8	0.8689285	220.8	0.902562	220.8	-0.229564	220.8	-0.2483024	220.8	-0.2661742	220.8	-0.2136259	220.8	-0.1984912	220.8	-0.2131464	220.8	-0.179387	220.8	-0.1737424	220.8	-0.2264434
221	0.8699734	221	0.8346981	221	0.8821312	221	0.8570899	221	0.8276001	221	0.8727714	221	0.9021354	221	-0.2262073	221	-0.2497183	221	-0.2659566	221	-0.218312	221	-0.1945867	221	-0.2134373	221	-0.1811748	221	-0.1719615	221	-0.2291332
221.2	0.8687932	221.2	0.8342803	221.2	0.8813686	221.2	0.8566824	221.2	0.8258856	221.2	0.8719835	221.2	0.902113	221.2	-0.2307159	221.2	-0.2475218	221.2	-0.2617583	221.2	-0.2160252	221.2	-0.2018985	221.2	-0.2147229	221.2	-0.1813718	221.2	-0.1725902	221.2	-0.2228131
221.4	0.8699175	221.4	0.8409357	221.4	0.8835645	221.4	0.8597962	221.4	0.8245106	221.4	0.8717819	221.4	0.9078604	221.4	-0.2319736	221.4	-0.2485046	221.4	-0.2672147	221.4	-0.217432	221.4	-0.19423	221.4	-0.2138539	221.4	-0.1826363	221.4	-0.1720506	221.4	-0.2238265
221.6	0.874297	221.6	0.838456	221.6	0.8821477	221.6	0.8628486	221.6	0.8341578	221.6	0.8715381	221.6	0.9070277	221.6	-0.2327484	221.6	-0.2488522	221.6	-0.2640671	221.6	-0.2158399	221.6	-0.1955173	221.6	-0.2145941	221.6	-0.1835447	221.6	-0.1703591	221.6	-0.2264363
221.8	0.8746334	221.8	0.8416793	221.8	0.886433	221.8	0.8579699	221.8	0.833289	221.8	0.8743775	221.8	0.9107712	221.8	-0.2304204	221.8	-0.2507394	221.8	-0.2629929	221.8	-0.2191917	221.8	-0.1930927	221.8	-0.2115926	221.8	-0.1861735	221.8	-0.173462	221.8	-0.226386
222	0.8736199	222	0.8408512	222	0.8851037	222	0.8632039	222	0.8284071	222	0.8715944	222	0.9077162	222	-0.2296254	222	-0.2404339	222	-0.2639771	222	-0.2201481	222	-0.1937547	222	-0.2125775	222	-0.1859807	222	-0.1769111	222	-0.2254047
222.2	0.8698614	222.2	0.8421407	222.2	0.8880473	222.2	0.8649996	222.2	0.8361173	222.2	0.8754953	222.2	0.9096432	222.2	-0.2320625	222.2	-0.249182	222.2	-0.2673689	222.2	-0.212044	222.2	-0.1912264	222.2	-0.2123872	222.2	-0.1783234	222.2	-0.1745282	222.2	-0.225365
222.4	0.8698925	222.4	0.8462105	222.4	0.887855	222.4	0.8664638	222.4	0.8342335	222.4	0.8762004	222.4	0.9094923	222.4	-0.2311497	222.4	-0.2455218	222.4	-0.2589591	222.4	-0.2161782	222.4	-0.1951473	222.4	-0.2081193	222.4	-0.1832515	222.4	-0.1716373	222.4	-0.2259421
222.6	0.8794407	222.6	0.8433099	222.6	0.8894901	222.6	0.8697624	222.6	0.8329329	222.6	0.8765447	222.6	0.9153467	222.6	-0.2267445	222.6	-0.2517233	222.6	-0.2622834	222.6	-0.2177386	222.6	-0.1936184	222.6	-0.2138225	222.6	-0.1822638	222.6	-0.1679211	222.6	-0.2268277
222.8	0.8770638	222.8	0.8418453	222.8	0.8936706	222.8	0.8672143	222.8	0.8403737	222.8	0.8769271	222.8	0.9147212	222.8	-0.227444	222.8	-0.2476991	222.8	-0.2652244	222.8	-0.2146923	222.8	-0.1934955	222.8	-0.2088578	222.8	-0.1755207	222.8	-0.1704251	222.8	-0.2278056
223	0.8792894	223	0.8447134	223	0.8984576	223	0.8688425	223	0.8369731	223	0.8800363	223	0.9153078	223	-0.2261823	223	-0.249013	223	-0.2602386	223	-0.2141132	223	-0.1940519	223	-0.214579	223	-0.180831	223	-0.1693332	223	-0.2254947
223.2	0.8812399	223.2	0.8452694	223.2	0.8949205	223.2	0.8684737	223.2	0.8405986	223.2	0.8797837	223.2	0.9171025	223.2	-0.2316684	223.2	-0.2475295	223.2	-0.260327	223.2	-0.214419	223.2	-0.1933873	223.2	-0.213495	223.2	-0.1813762	223.2	-0.1706461	223.2	-0.2262618
223.4	0.8802424	223.4	0.8437289	223.4	0.8971668	223.4	0.8691103	223.4	0.8407793	223.4	0.8836789	223.4	0.9123235	223.4	-0.2230684	223.4	-0.2431974	223.4	-0.2601211	223.4	-0.21329	223.4	-0.1920938	223.4	-0.2095059	223.4	-0.1794307	223.4	-0.1730395	223.4	-0.2221166
223.62	0.882049	223.62	0.8494033	223.62	0.8938378	223.62	0.8734256	223.62	0.8419905	223.62	0.8831148	223.62	0.9134701	223.62	-0.2263089	223.6	-0.2456552	223.6	-0.2651746	223.6	-0.2184917	223.6	-0.1943857	223.6	-0.20906	223.6	-0.1793935	223.6	-0.1737319	223.6	-0.2206821
223.8	0.8817659	223.8	0.8507665	223.8	0.8940731	223.8	0.8728641	223.8	0.8416988	223.8	0.8822945	223.8	0.9209389	223.8	-0.2308901	223.8	-0.2424071	223.8	-0.2646702	223.8	-0.2169404	223.8	-0.1916774	223.8	-0.2103737	223.8	-0.1785167	223.8	-0.171128	223.8	-0.2234618
224	0.8820427	224	0.8523444	224	0.8965873	224	0.8764884	224	0.8425545	224	0.8837017	224	0.9188864	224	-0.2266885	224	-0.2500044	224	-0.258836	224	-0.2131694	224	-0.1919705	224	-0.2100549	224	-0.181396	224	-0.1727766	224	-0.2279673
224.2	0.8849314	224.2	0.8525234	224.2	0.8951782	224.2	0.8735433	224.2	0.8472449	224.2	0.8850008	224.2	0.9211796	224.2	-0.2309915	224.2	-0.2442594	224.2	-0.2637959	224.2	-0.2120573	224.2	-0.1876576	224.2	-0.2108758	224.2	-0.1803455	224.2	-0.1683255	224.2	-0.2271511
224.4	0.885743	224.4	0.8556728	224.4	0.8996773	224.4	0.8798532	224.4	0.8430744	224.4	0.8933393	224.4	0.9195555	224.4	-0.2240944	224.4	-0.2437422	224.4	-0.2647927	224.4	-0.2119276	224.4	-0.1971009	224.4	-0.2102529	224.4	-0.1796253	224.4	-0.1690407	224.4	-0.2188208
224.6	0.8846195	224.6	0.8588889	224.6	0.8976328	224.6	0.8773386	224.6	0.8418798	224.6	0.8850283	224.6	0.9194785	224.6	-0.227394	224.6	-0.246733	224.6	-0.2613543	224.6	-0.2138978	224.6	-0.193055	224.6	-0.2066422	224.6	-0.1782987	224.6	-0.1722197	224.6	-0.222701
224.8	0.8862013	224.8	0.8555188	224.8	0.9018424	224.8	0.8739419	224.8	0.8429707	224.8	0.8952562	224.8	0.9270708	224.8	-0.2251411	224.8	-0.2451544	224.8	-0.2669149	224.8	-0.2155946	224.8	-0.1929058	224.8	-0.2132605	224.8	-0.1824976	224.8	-0.1743291	224.8	-0.2186798
225	0.8872934	225	0.8536994	225	0.902487	225	0.8771729	225	0.8487508	225	0.8924513	225	0.9250572	225	-0.22292	225	-0.2450185	225	-0.2639569	225	-0.2131681	225	-0.1950784	225	-0.2118165	225	-0.1793921	225	-0.1678449	225	-0.2237339
225.2	0.8857829	225.2	0.8569068	225.2	0.8993446	225.2	0.87974	225.2	0.8471279	225.2	0.8877325	225.2	0.9294571	225.2	-0.2288199	225.21	-0.2433796	225.21	-0.2614457	225.21	-0.2140281	225.21	-0.1862545	225.21	-0.2087697	225.21	-0.1826391	225.21	-0.1696388	225.21	-0.2246799
225.4	0.8927234	225.4	0.8550706	225.4	0.9065813	225.4	0.8808681	225.4	0.847199	225.4	0.8881136	225.4	0.9329244	225.4	-0.2274901	225.4	-0.2448078	225.4	-0.2622049	225.4	-0.213876	225.4	-0.1937736	225.4	-0.2096274	225.4	-0.1772226	225.4	-0.1696577	225.4	-0.2226852
225.6	0.8878626	225.6	0.8583937	225.6	0.9059308	225.6	0.8779888	225.6	0.8507618	225.6	0.8892407	225.6	0.931162	225.6	-0.2224654	225.6	-0.2442652	225.6	-0.2621359	225.6	-0.2148032	225.6	-0.1908478	225.6	-0.2098962	225.6	-0.1815081	225.6	-0.1672782	225.6	-0.22315
225.8	0.8906036	225.8	0.8597166	225.8	0.9054518	225.8	0.8804566	225.8	0.8515483	225.8	0.8943193	225.8	0.9296561	225.8	-0.2331022	225.8	-0.2453793	225.8	-0.2608978	225.8	-0.2137885	225.8	-0.1941126	225.8	-0.2101358	225.8	-0.177774	225.8	-0.1691361	225.8	-0.2246027
226	0.8915853	226	0.8608308	226	0.9087647	226	0.8847191	226	0.8520143	226	0.8951123	226	0.9323047	226	-0.2265124	226	-0.2427498	226	-0.2636229	226	-0.2140077	226	-0.1907794	226	-0.2076973	226	-0.1769318	226	-0.1681575	226	-0.2214482
226.2	0.8905976	226.2	0.857648	226.2	0.9119343	226.2	0.8844024	226.2	0.8554294	226.2	0.8966103	226.2	0.9320131	226.2	-0.227065	226.2	-0.2433222	226.2	-0.2594697	226.2	-0.2139042	226.2	-0.1893523	226.2	-0.2147062	226.2	-0.1755333	226.2	-0.1682106	226.2	-0.2208455
226.4	0.8961388	226.4	0.8635051	226.4	0.9118701	226.4	0.8873121	226.4	0.8506886	226.4	0.8966513	226.4	0.931483	226.4	-0.2245994	226.4	-0.2441549	226.4	-0.2616628	226.4	-0.2140103	226.4	-0.1920865	226.4	-0.2106673	226.4	-0.1803404	226.4	-0.163517	226.4	-0.2232817
226.6	0.896809	226.6	0.867882	226.6	0.9136184	226.6	0.8858175	226.6	0.8584971	226.6	0.8951758	226.6	0.9341552	226.6	-0.2284852	226.6	-0.2448319	226.6	-0.258715	226.6	-0.2110713	226.6	-0.1950078	226.6	-0.2075308	226.6	-0.1806466	226.6	-0.1648942	226.6	-0.2252616
226.8	0.8939745	226.8	0.8653641	226.8	0.9096401	226.8	0.8859527	226.8	0.8549364	226.8	0.8973819	226.8	0.9360956	226.8	-0.22669	226.8	-0.2435732	226.8	-0.2578202	226.8	-0.2115413	226.8	-0.1933223	226.8	-0.2102572	226.8	-0.1771196	226.8	-0.1640205	226.8	-0.219649
227	0.8991559	227	0.8658513	227	0.9118737	227	0.8881454	227	0.8523326	227	0.8991359	227	0.9329357	227	-0.2215606	227	-0.2427601	227	-0.2625945	227	-0.2122125	227	-0.1939834	227	-0.2106223	227	-0.1725459	227	-0.1668683	227	-0.2197897
227.2	0.9015164	227.2	0.8670118	227.2	0.9141627	227.2	0.8901302	227.2	0.8614022	227.2	0.8979834	227.2	0.9360991	227.2	-0.229215	227.2	-0.2438775	227.2	-0.2582634	227.2	-0.2085856	227.2	-0.190804	227.2	-0.2098371	227.2	-0.1792684	227.2	-0.1668417	227.2	-0.2247005
227.4	0.8983976	227.4	0.8683566	227.4	0.9112949	227.4	0.8872065	227.4	0.8564121	227.4	0.9031544	227.4	0.9368947	227.4	-0.2302979	227.4	-0.2459003	227.4	-0.262508	227.4	-0.2111039	227.4	-0.1855466	227.4	-0.2086447	227.4	-0.178809	227.4	-0.1697429	227.4	-0.222509
227.6	0.8975213	227.6	0.8693814	227.6	0.9141525	227.6	0.8903816	227.6	0.8622251	227.6	0.9023027	227.6	0.9400121	227.6	-0.2285847	227.6	-0.2430576	227.6	-0.2598154	227.6	-0.2115828	227.6	-0.1919691	227.6	-0.2098746	227.6	-0.175493	227.6	-0.1689649	227.6	-0.2252421
227.8	0.8999927	227.8	0.8721815	227.8	0.9173679	227.8	0.8914232	227.8	0.8623695	227.8	0.8998995	227.8	0.9365709	227.8	-0.2279779	227.8	-0.2426297	227.8	-0.2583893	227.8	-0.2120031	227.8	-0.1898634	227.8	-0.2101228	227.8	-0.1803563	227.8	-0.1733342	227.8	-0.2237328
228	0.9009594	228	0.8706368	228	0.9173057	228	0.8914691	228	0.8653466	228	0.9050166	228	0.9381459	228	-0.2307216	228	-0.2485483	228	-0.2552489	228	-0.2095433	228	-0.1886291	228	-0.2068183	228	-0.1769058	228	-0.1701228	228	-0.2219258
228.2	0.9060512	228.2	0.8707246	228.2	0.9207865	228.2	0.8932859	228.2	0.8618247	228.2	0.9016417	228.2	0.9476378	228.2	-0.2285651	228.2	-0.2419635	228.2	-0.2586836	228.2	-0.2101783	228.2	-0.1910353	228.2	-0.210282	228.2	-0.1779721	228.2	-0.1690497	228.2	-0.2235408
228.4	0.8959849	228.4	0.8744216	228.4	0.9179882	228.4	0.8970249	228.4	0.8611187	228.4	0.9060879	228.4	0.9402494	228.4	-0.2292124	228.4	-0.2448422	228.4	-0.2586948	228.4	-0.2135056	228.4	-0.1886191	228.4	-0.2147015	228.4	-0.1736894	228.4	-0.1647094	228.4	-0.2217043
228.6	0.9042085	228.6	0.8743978	228.6	0.9201656	228.6	0.8983443	228.6	0.8661005	228.6	0.9079672	228.6	0.9429649	228.6	-0.225027	228.6	-0.2373154	228.6	-0.2632914	228.6	-0.2112272	228.6	-0.1912518	228.6	-0.2089461	228.6	-0.1746027	228.6	-0.1628136	228.6	-0.2246838
228.8	0.9069561	228.8	0.8761269	228.8	0.9234151	228.8	0.8983834	228.8	0.8626586	228.8	0.909337	228.8	0.9470813	228.8	-0.225081	228.8	-0.2438051	228.8	-0.260637	228.8	-0.2088754	228.8	-0.184815	228.8	-0.2064835	228.8	-0.1769294	228.8	-0.1691406	228.8	-0.2258491
229	0.908111	229	0.8795387	229	0.9246958	229	0.8970557	229	0.8707696	229	0.9087077	229	0.9471927	229	-0.2282853	229	-0.2475873	229	-0.2587941	229	-0.2112818	229	-0.1857712	229	-0.2052362	229	-0.1740532	229	-0.1688991	229	-0.2251365
229.2	0.9101954	229.2	0.8746203	229.2	0.9211942	229.2	0.8969505	229.2	0.8652599	229.2	0.9112676	229.2	0.942994	229.2	-0.2222743	229.2	-0.2392743	229.2	-0.2561082	229.2	-0.2081623	229.2	-0.1873512	229.2	-0.2102668	229.2	-0.1756118	229.2	-0.1654966	229.2	-0.2215615
229.4	0.9061497	229.4	0.8753445	229.4	0.9225659	229.4	0.9052556	229.4	0.8729281	229.4	0.9126436	229.4	0.9481435	229.4	-0.2240164	229.4	-0.2398181	229.4	-0.2547241	229.4	-0.2120364	229.4	-0.1886118	229.4	-0.2059348	229.4	-0.1786476	229.4	-0.1679215	229.4	-0.2192707
229.6	0.907222	229.6	0.8810529	229.6	0.9278748	229.6	0.89971	229.6	0.8680599	229.6	0.911276	229.6	0.949238	229.6	-0.2226587	229.6	-0.2373835	229.6	-0.2530427	229.6	-0.2062139	229.6	-0.1887247	229.6	-0.2042894	229.6	-0.1743677	229.6	-0.1637164	229.6	-0.2198791
229.8	0.9100066	229.8	0.8785297	229.8	0.9279758	229.8	0.897688	229.8	0.8696972	229.8	0.9166057	229.8	0.9464143	229.8	-0.2229169	229.8	-0.2456611	229.8	-0.2567025	229.8	-0.2119952	229.8	-0.1910297	229.8	-0.2055178	229.8	-0.1795151	229.8	-0.1676198	229.8	-0.2194711
230	0.9544337	230	0.925896	230	0.9731178	230	0.9445346	230	0.9164477	230	0.9548665	230	0.987289	230	-0.230348	230	-0.2454413	230	-0.2585144	230	-0.2034995	230	-0.1880507	230	-0.2082626	230	-0.1753364	230	-0.1622362	230	-0.2214491
230.2	0.9571081	230.2	0.9206821	230.2	0.9757941	230.2	0.9444517	230.2	0.9162648	230.2	0.9620072	230.2	0.9894531	230.2	-0.2275502	230.2	-0.2398764	230.2	-0.2567512	230.2	-0.2055829	230.2	-0.1865668	230.2	-0.2026817	230.2	-0.169961	230.2	-0.1629539	230.2	-0.2214914
230.4	0.9599343	230.4	0.9269474	230.4	0.9764276	230.4	0.9474941	230.4	0.9170192	230.4	0.9601214	230.4	0.9921104	230.4	-0.2273036	230.4	-0.2370819	230.4	-0.2560895	230.4	-0.2077106	230.4	-0.1842461	230.4	-0.2027441	230.4	-0.1763715	230.4	-0.1644354	230.4	-0.2217591
230.6	0.9583274	230.6	0.9281375	230.6	0.977633	230.6	0.9500096	230.6	0.914818	230.6	0.9641532	230.6	0.9925355	230.6	-0.2284242	230.59	-0.2422365	230.59	-0.2557444	230.59	-0.2050954	230.59	-0.189796	230.59	-0.2087424	230.59	-0.17285	230.59	-0.1613871	230.59	-0.2185262
230.8	0.9595849	230.8	0.9336892	230.8	0.9799619	230.8	0.9528903	230.8	0.918004	230.8	0.9616492	230.8	0.9930301	230.8	-0.2253095	230.79	-0.2385354	230.79	-0.2554222	230.79	-0.2112325	230.79	-0.1832005	230.79	-0.2050205	230.79	-0.177728	230.79	-0.1669672	230.79	-0.2218017
231	0.9588636	231	0.9241956	231	0.9847811	231	0.9536892	231	0.9208372	231	0.9708811	231	0.9931675	231	-0.2279227	231	-0.2414311	231	-0.2511542	231	-0.2074864	231	-0.1870804	231	-0.2085829	231	-0.1702479	231	-0.166631	231	-0.219916
231.2	0.9634818	231.2	0.9303252	231.2	0.9804676	231.2	0.9480411	231.2	0.9195739	231.2	0.967229	231.2	1.001765	231.2	-0.2235257	231.2	-0.2424927	231.2	-0.2528869	231.2	-0.2066572	231.2	-0.1886321	231.2	-0.2051006	231.2	-0.1759496	231.2	-0.1680358	231.2	-0.2183386
231.4	0.962399	231.4	0.9292909	231.4	0.982905	231.4	0.9497325	231.4	0.9216641	231.4	0.9638532	231.4	0.9954906	231.4	-0.2238671	231.4	-0.2408104	231.4	-0.2576018	231.4	-0.20869	231.4	-0.1871505	231.4	-0.2087499	231.4	-0.1724709	231.4	-0.161359	231.4	-0.2169413
231.6	0.9617686	231.6	0.9314488	231.6	0.980593	231.6	0.9556556	231.6	0.9206917	231.6	0.9620913	231.6	0.9965449	231.6	-0.2259251	231.6	-0.2407142	231.6	-0.2568614	231.6	-0.2041617	231.6	-0.1924122	231.6	-0.1994042	231.6	-0.1773638	231.6	-0.1643106	231.6	-0.2178226
231.8	0.9659072	231.8	0.9376342	231.8	0.9849031	231.8	0.949524	231.8	0.920292	231.8	0.9647005	231.8	0.9966859	231.8	-0.2258616	231.8	-0.2428637	231.8	-0.258601	231.8	-0.2101486	231.8	-0.1848425	231.8	-0.2051826	231.8	-0.1740289	231.8	-0.163153	231.8	-0.2121385
232	0.9637751	232	0.9301918	232	0.9822002	232	0.9543127	232	0.9190627	232	0.9630537	232	0.9952837	232	-0.2231715	232	-0.2402055	232	-0.2522695	232	-0.2038792	232	-0.1827893	232	-0.2036823	232	-0.1761852	232	-0.1666593	232	-0.2209492
232.2	0.9639205	232.2	0.9367251	232.2	0.9824064	232.2	0.9529341	232.2	0.9258811	232.2	0.9646872	232.2	1.001178	232.2	-0.2214119	232.19	-0.2394584	232.19	-0.2537292	232.19	-0.2041758	232.19	-0.1823086	232.19	-0.2035842	232.19	-0.1735288	232.19	-0.163939	232.19	-0.2178927
232.4	0.9653259	232.4	0.9322833	232.4	0.9841186	232.4	0.9562455	232.4	0.9199428	232.4	0.9692843	232.4	1.003347	232.4	-0.2281405	232.4	-0.2365206	232.4	-0.2580894	232.4	-0.2084411	232.4	-0.1817735	232.4	-0.2057573	232.4	-0.1752958	232.4	-0.1610191	232.4	-0.2190258
232.6	0.9634852	232.6	0.9327085	232.6	0.9820815	232.6	0.9508886	232.6	0.9248176	232.6	0.9659445	232.6	0.9966966	232.6	-0.2252916	232.59	-0.2376256	232.59	-0.2496779	232.59	-0.2042823	232.59	-0.1851063	232.59	-0.2007895	232.59	-0.1707358	232.59	-0.1639948	232.59	-0.2202423
232.8	0.9617692	232.8	0.930423	232.8	0.9829547	232.8	0.9547226	232.8	0.9283581	232.8	0.968343	232.8	0.9987334	232.8	-0.2228066	232.79	-0.2407769	232.79	-0.2481383	232.79	-0.2100791	232.79	-0.1839667	232.79	-0.2031772	232.79	-0.1738302	232.79	-0.1671026	232.79	-0.2190329
233	0.9652904	233	0.9280713	233	0.9860243	233	0.9547454	233	0.9269623	233	0.9693139	233	0.9992329	233	-0.2187078	232.99	-0.2429465	232.99	-0.2531675	232.99	-0.2068724	232.99	-0.18546	232.99	-0.2064621	232.99	-0.1745871	232.99	-0.1640524	232.99	-0.2202632
233.2	0.9683531	233.2	0.9355433	233.2	0.9885271	233.2	0.9547355	233.2	0.9240003	233.2	0.9708904	233.2	0.9977047	233.2	-0.2237817	233.19	-0.2377382	233.19	-0.2559252	233.19	-0.2070782	233.19	-0.1894123	233.19	-0.2056399	233.19	-0.1701744	233.19	-0.1617804	233.19	-0.2201699
233.4	0.9613894	233.4	0.9278005	233.4	0.9845847	233.4	0.9559602	233.4	0.9243866	233.4	0.9698256	233.4	1.000457	233.4	-0.2246216	233.4	-0.2346602	233.4	-0.2562811	233.4	-0.2042222	233.4	-0.1860412	233.4	-0.1965971	233.4	-0.1707829	233.4	-0.1633961	233.4	-0.2133754
233.6	0.9662709	233.6	0.9329863	233.6	0.9808373	233.6	0.9598713	233.6	0.9228399	233.6	0.9633629	233.6	0.9970533	233.6	-0.2299229	233.6	-0.2367664	233.6	-0.2529231	233.6	-0.2059059	233.6	-0.1842198	233.6	-0.1997091	233.6	-0.1717715	233.6	-0.161788	233.6	-0.2137681
233.8	0.9647239	233.8	0.9347948	233.8	0.9825677	233.8	0.9552418	233.8	0.9272373	233.8	0.9663748	233.8	1.009494	233.8	-0.2238434	233.8	-0.2388834	233.8	-0.2530519	233.8	-0.2036787	233.8	-0.185586	233.8	-0.199392	233.8	-0.1731964	233.8	-0.1628376	233.8	-0.2183818
234	0.9648148	234	0.9325366	234	0.9865005	234	0.9522052	234	0.9270892	234	0.967609	234	0.9982242	234	-0.2241252	234	-0.241466	234	-0.2538122	234	-0.2035746	234	-0.1799409	234	-0.2007307	234	-0.1717675	234	-0.1655202	234	-0.217892
234.2	0.9630589	234.2	0.9354027	234.2	0.98686	234.2	0.9543048	234.2	0.9241316	234.2	0.9675804	234.2	0.9988256	234.2	-0.2226349	234.19	-0.2443167	234.19	-0.2542881	234.19	-0.2053138	234.19	-0.1845313	234.19	-0.1984152	234.19	-0.170401	234.19	-0.1616701	234.19	-0.2180497
234.4	0.9662988	234.4	0.9363816	234.4	0.9850178	234.4	0.9595693	234.4	0.9272704	234.4	0.9657642	234.4	1.002533	234.4	-0.2233031	234.4	-0.234226	234.4	-0.2514933	234.4	-0.2049036	234.4	-0.1866066	234.4	-0.2013458	234.4	-0.1723522	234.4	-0.1633274	234.4	-0.2192131
234.6	0.9673775	234.6	0.9335372	234.6	0.9851519	234.6	0.9561461	234.6	0.9262932	234.6	0.9689523	234.6	1.001245	234.6	-0.2228205	234.6	-0.2363787	234.6	-0.2502078	234.6	-0.2062278	234.6	-0.1844484	234.6	-0.2088203	234.6	-0.1678055	234.6	-0.1593054	234.6	-0.2165733
234.8	0.9680769	234.8	0.9343794	234.8	0.9828374	234.8	0.952047	234.8	0.9269948	234.8	0.9658895	234.8	1.00174	234.8	-0.2180621	234.79	-0.2383765	234.79	-0.2524546	234.79	-0.2044007	234.79	-0.1840373	234.79	-0.204286	234.79	-0.1709518	234.79	-0.1622632	234.79	-0.2104835
235	0.9703351	235	0.9375092	235	0.9855686	235	0.9518037	235	0.9253525	235	0.966691	235	1.002898	235	-0.2195273	234.99	-0.2367662	234.99	-0.2568895	234.99	-0.2085676	234.99	-0.1820918	234.99	-0.2031379	234.99	-0.1687199	234.99	-0.1606598	234.99	-0.2160791
235.2	0.9655207	235.2	0.9358473	235.2	0.9848562	235.2	0.9609987	235.2	0.9260355	235.2	0.9689498	235.2	1.007412	235.2	-0.218601	235.19	-0.2341408	235.19	-0.2508378	235.19	-0.2048426	235.19	-0.184399	235.19	-0.2003295	235.19	-0.1686412	235.19	-0.1602281	235.19	-0.2185552
235.4	0.9638936	235.4	0.9363096	235.4	0.9924375	235.4	0.9542047	235.4	0.9270472	235.4	0.9693102	235.4	1.005351	235.4	-0.2244104	235.39	-0.2397833	235.39	-0.2494467	235.39	-0.1987759	235.39	-0.1850631	235.39	-0.2001844	235.39	-0.1692471	235.39	-0.1612887	235.39	-0.2149457
235.6	0.9652539	235.6	0.9348425	235.6	0.988993	235.6	0.9556968	235.6	0.9259917	235.6	0.9696923	235.6	0.9985093	235.6	-0.2235905	235.6	-0.2391175	235.6	-0.2509913	235.6	-0.2050189	235.6	-0.1834594	235.6	-0.2025394	235.6	-0.1630511	235.6	-0.1577886	235.6	-0.211973
235.8	0.9660025	235.8	0.9329015	235.8	0.9857923	235.8	0.9585724	235.8	0.9232402	235.8	0.9703497	235.8	1.00536	235.8	-0.2207364	235.79	-0.2395436	235.79	-0.2552753	235.79	-0.2017662	235.79	-0.1825129	235.79	-0.1998547	235.79	-0.1665661	235.79	-0.1595621	235.79	-0.2164795
236	0.9651551	236	0.9396396	236	0.9862876	236	0.9608383	236	0.9261591	236	0.9717686	236	1.005041	236	-0.2212762	236	-0.2414663	236	-0.2514194	236	-0.2063152	236	-0.1855907	236	-0.2001309	236	-0.1675041	236	-0.1639122	236	-0.2111622
236.2	0.9696938	236.2	0.9335697	236.2	0.9848731	236.2	0.9566404	236.2	0.9307702	236.2	0.9684657	236.2	1.001936	236.2	-0.2246519	236.2	-0.2358881	236.2	-0.2543398	236.2	-0.2037112	236.2	-0.1831518	236.2	-0.1998784	236.2	-0.1674428	236.2	-0.1622136	236.2	-0.215014
236.4	0.9686199	236.4	0.9364997	236.4	0.9913604	236.4	0.9520754	236.4	0.9297302	236.4	0.9712107	236.4	1.006993	236.4	-0.2221049	236.4	-0.2387076	236.4	-0.2556317	236.4	-0.2107445	236.4	-0.1843104	236.4	-0.200516	236.4	-0.1647509	236.4	-0.1619211	236.4	-0.2181509
236.6	0.9676316	236.6	0.9366173	236.6	0.9855698	236.6	0.9577821	236.6	0.9276416	236.6	0.974089	236.6	1.002557	236.6	-0.2231098	236.6	-0.2367093	236.6	-0.2509054	236.6	-0.2013872	236.6	-0.1822972	236.6	-0.1997827	236.6	-0.167863	236.6	-0.1591144	236.6	-0.2116234
236.8	0.9689589	236.8	0.9366121	236.8	0.9912577	236.8	0.9563615	236.8	0.9262058	236.8	0.970202	236.8	1.003445	236.8	-0.220642	236.79	-0.2329158	236.79	-0.2511657	236.79	-0.2030748	236.79	-0.1797352	236.79	-0.2011904	236.79	-0.1751652	236.79	-0.1586991	236.79	-0.2101253
237	0.9701532	237	0.9395185	237	0.989364	237	0.9586337	237	0.92729	237	0.9701793	237	1.006065	237	-0.2205934	236.99	-0.2352728	236.99	-0.2502765	236.99	-0.206618	236.99	-0.1832421	236.99	-0.2000465	236.99	-0.1709786	236.99	-0.158025	236.99	-0.2137816
237.2	0.9628639	237.2	0.9375834	237.2	0.9893822	237.2	0.956505	237.2	0.9291599	237.2	0.9715291	237.2	1.002417	237.2	-0.2184183	237.19	-0.2382121	237.19	-0.2524022	237.19	-0.2030893	237.19	-0.1796227	237.19	-0.2009698	237.19	-0.1686747	237.19	-0.1572463	237.19	-0.2148286
237.4	0.9675426	237.4	0.9408584	237.4	0.9858516	237.4	0.9521344	237.4	0.9284974	237.4	0.9701868	237.4	1.005424	237.4	-0.2194283	237.39	-0.2359229	237.39	-0.2527774	237.39	-0.2036162	237.39	-0.1822292	237.39	-0.2011248	237.39	-0.1668579	237.39	-0.1582474	237.39	-0.2203555
237.6	0.9661605	237.6	0.9361679	237.6	0.9892543	237.6	0.9623637	237.6	0.934777	237.6	0.9706262	237.6	1.004462	237.6	-0.2232181	237.59	-0.2342922	237.59	-0.2542643	237.59	-0.2076378	237.59	-0.1840003	237.59	-0.1986144	237.59	-0.1718755	237.59	-0.1622411	237.59	-0.2140096
237.8	0.9654072	237.8	0.9350986	237.8	0.987485	237.8	0.9595835	237.8	0.9299706	237.8	0.9697681	237.8	1.002836	237.8	-0.2208727	237.79	-0.2385421	237.79	-0.2559122	237.79	-0.2072786	237.79	-0.1777229	237.79	-0.1983389	237.79	-0.1677588	237.79	-0.1621969	237.79	-0.2114654
238	0.9674754	238	0.93808	238	0.9880949	238	0.9666942	238	0.9286946	238	0.9726282	238	1.008862	238	-0.2211975	238	-0.2388591	238	-0.253359	238	-0.1976376	238	-0.1828899	238	-0.1997984	238	-0.167637	238	-0.1620802	238	-0.2136619
238.2	0.970989	238.2	0.9405374	238.2	0.9869127	238.2	0.95862	238.2	0.9337807	238.2	0.9685966	238.2	1.003455	238.2	-0.2238699	238.19	-0.2317244	238.19	-0.2540317	238.19	-0.2041696	238.19	-0.1793406	238.19	-0.1967833	238.19	-0.1688877	238.19	-0.1584472	238.19	-0.2123987
238.4	0.9711152	238.4	0.9370092	238.4	0.9872717	238.4	0.964449	238.4	0.9305923	238.4	0.9729186	238.4	1.006371	238.4	-0.2210149	238.4	-0.2328171	238.4	-0.253384	238.4	-0.1997248	238.4	-0.1802127	238.4	-0.2023445	238.4	-0.169718	238.4	-0.1547196	238.4	-0.2137335
238.6	0.9672444	238.6	0.9374973	238.6	0.9890994	238.6	0.9596735	238.6	0.924279	238.6	0.9735596	238.6	1.006987	238.6	-0.2161442	238.59	-0.2363142	238.59	-0.2534427	238.59	-0.2017678	238.59	-0.1797604	238.59	-0.201408	238.59	-0.1614067	238.59	-0.1591486	238.59	-0.2137628
238.8	0.9677114	238.8	0.9372395	238.8	0.9885275	238.8	0.9617328	238.8	0.9322257	238.8	0.973364	238.8	1.001649	238.8	-0.2217664	238.79	-0.2355424	238.79	-0.2485207	238.79	-0.2047538	238.79	-0.1800679	238.79	-0.1987008	238.79	-0.1674394	238.79	-0.1609136	238.79	-0.2135398
239	0.97022	239	0.9364313	239	0.9926459	239	0.9626671	239	0.929289	239	0.9729668	239	1.00559	239	-0.2168881	238.99	-0.2342175	238.99	-0.2490872	238.99	-0.2008228	238.99	-0.1788183	238.99	-0.2017591	238.99	-0.1669016	238.99	-0.1573782	238.99	-0.2125212
239.2	0.9679256	239.2	0.9416547	239.2	0.9930173	239.2	0.9581525	239.2	0.9309024	239.2	0.9730085	239.2	1.009273	239.2	-0.222596	239.19	-0.2371899	239.19	-0.2521456	239.19	-0.2004637	239.19	-0.1798722	239.19	-0.2003811	239.19	-0.1702763	239.19	-0.1560069	239.19	-0.2179802
239.4	0.9656112	239.4	0.938885	239.4	0.9908202	239.4	0.960866	239.4	0.9297163	239.4	0.9732457	239.4	1.003725	239.4	-0.2198887	239.39	-0.2370856	239.39	-0.2542522	239.39	-0.20348	239.39	-0.1858517	239.39	-0.1992074	239.39	-0.1670519	239.39	-0.1572681	239.39	-0.2141805
239.6	0.9664115	239.6	0.9427534	239.6	0.9903525	239.6	0.9611779	239.6	0.930888	239.6	0.9758044	239.6	1.004567	239.6	-0.2181151	239.59	-0.2358057	239.59	-0.2462218	239.59	-0.2012794	239.59	-0.1785504	239.59	-0.1991068	239.59	-0.1678093	239.59	-0.1584545	239.59	-0.2148072
239.8	0.9685433	239.8	0.9365386	239.8	0.9863279	239.8	0.9643815	239.8	0.9298818	239.8	0.9734018	239.8	1.009983	239.8	-0.219124	239.79	-0.2365795	239.79	-0.2514589	239.79	-0.198292	239.79	-0.176951	239.79	-0.2001883	239.79	-0.1607751	239.79	-0.1555955	239.79	-0.2092628
240	0.9697722	240	0.9391844	240	0.9888877	240	0.9586666	240	0.926853	240	0.9753387	240	1.006654	240	-0.21721	240	-0.2306038	240	-0.2520627	240	-0.2014166	240	-0.1795702	240	-0.197038	240	-0.1711646	240	-0.156189	240	-0.2165779
240.2	0.9708598	240.2	0.9387866	240.2	0.989053	240.2	0.9641229	240.2	0.9288461	240.2	0.9714193	240.2	1.004996	240.2	-0.2183076	240.2	-0.2358814	240.2	-0.2507106	240.2	-0.2032548	240.2	-0.1806816	240.2	-0.1933046	240.2	-0.1640996	240.2	-0.161853	240.2	-0.2098201
240.4	0.9674546	240.4	0.9374462	240.4	0.9879194	240.4	0.9613245	240.4	0.9309245	240.4	0.9754102	240.4	1.004958	240.4	-0.2160484	240.39	-0.2362456	240.39	-0.2488319	240.39	-0.2038709	240.39	-0.1797897	240.39	-0.1978538	240.39	-0.1636204	240.39	-0.1617879	240.39	-0.2155641
240.6	0.9732466	240.6	0.9381162	240.6	0.9881046	240.6	0.9642274	240.6	0.9306371	240.6	0.971761	240.6	1.008533	240.6	-0.2198464	240.6	-0.232788	240.6	-0.248168	240.6	-0.1993534	240.6	-0.177929	240.6	-0.1938174	240.6	-0.1658587	240.6	-0.1558369	240.6	-0.2154824
240.8	0.9702395	240.8	0.9396855	240.8	0.9935748	240.8	0.9615123	240.8	0.9292051	240.8	0.9726981	240.8	1.003617	240.8	-0.2186582	240.8	-0.2343863	240.8	-0.2514228	240.8	-0.2011651	240.8	-0.1785336	240.8	-0.1927202	240.8	-0.164469	240.8	-0.1510038	240.8	-0.2141233
241	0.9701707	241	0.9441708	241	0.990718	241	0.9632924	241	0.9340136	241	0.9744041	241	1.006528	241	-0.2163262	240.99	-0.2363984	240.99	-0.2480987	240.99	-0.1984707	240.99	-0.1718529	240.99	-0.192202	240.99	-0.1654692	240.99	-0.1597146	240.99	-0.2133644
241.2	0.9685424	241.2	0.9401503	241.2	0.989252	241.2	0.9608056	241.2	0.9318448	241.2	0.9764897	241.2	1.0036	241.2	-0.2182031	241.2	-0.2357761	241.2	-0.2443152	241.2	-0.1996197	241.2	-0.1778353	241.2	-0.1974098	241.2	-0.1619674	241.2	-0.1541984	241.2	-0.2097071
241.4	0.9723344	241.4	0.9381907	241.4	0.9873939	241.4	0.9623505	241.4	0.9344242	241.4	0.9737137	241.4	1.007782	241.4	-0.217518	241.39	-0.2275225	241.39	-0.249946	241.39	-0.1964636	241.39	-0.1778163	241.39	-0.1998863	241.39	-0.1642615	241.39	-0.1582893	241.39	-0.2133092
241.6	0.9701056	241.6	0.936868	241.6	0.9920875	241.6	0.9654872	241.6	0.927802	241.6	0.9759955	241.6	1.007811	241.6	-0.2158952	241.6	-0.2301913	241.6	-0.250835	241.6	-0.2018485	241.6	-0.1771974	241.6	-0.1932818	241.6	-0.1699713	241.6	-0.1551189	241.6	-0.2154651
241.8	0.9725659	241.8	0.9402358	241.8	0.9925144	241.8	0.9631943	241.8	0.9312873	241.8	0.9709409	241.8	1.008978	241.8	-0.2178695	241.79	-0.2316331	241.79	-0.2502522	241.79	-0.1996498	241.79	-0.174969	241.79	-0.19648	241.79	-0.1644231	241.79	-0.1552714	241.79	-0.2108998
242	0.9685465	242	0.940118	242	0.9934819	242	0.9665347	242	0.9295838	242	0.9740427	242	1.001896	242	-0.2166246	241.99	-0.232298	241.99	-0.2456796	241.99	-0.1989415	241.99	-0.1761178	241.99	-0.1972561	241.99	-0.1679841	241.99	-0.1550484	241.99	-0.2128365
242.2	0.9732077	242.2	0.9416065	242.2	0.9916865	242.2	0.9654093	242.2	0.9332329	242.2	0.9764866	242.2	1.006418	242.2	-0.2208297	242.19	-0.235829	242.19	-0.2494732	242.19	-0.1979308	242.19	-0.1791816	242.19	-0.1964921	242.19	-0.1684692	242.19	-0.1565429	242.19	-0.2122521
242.4	0.9692716	242.4	0.9398956	242.4	0.9970304	242.4	0.9661829	242.4	0.9319845	242.4	0.9781008	242.4	1.008171	242.4	-0.2180347	242.39	-0.2316264	242.39	-0.2512727	242.39	-0.1992794	242.39	-0.1776703	242.39	-0.1935896	242.39	-0.1675029	242.39	-0.1567177	242.39	-0.2134472
242.6	0.9718454	242.6	0.9407272	242.6	0.9941015	242.6	0.9622636	242.6	0.9343655	242.6	0.9762347	242.6	1.011517	242.6	-0.2168829	242.59	-0.2309943	242.59	-0.2456658	242.59	-0.193827	242.59	-0.1792465	242.59	-0.1957511	242.59	-0.1636941	242.59	-0.1576241	242.59	-0.2112655
242.8	0.9677692	242.8	0.94058	242.8	0.9918169	242.8	0.9655349	242.8	0.9322411	242.8	0.9752831	242.8	1.005524	242.8	-0.2153744	242.79	-0.2338234	242.79	-0.2489199	242.79	-0.1978196	242.79	-0.1756648	242.79	-0.1939002	242.79	-0.1597119	242.79	-0.1560813	242.79	-0.2088609
243	0.9740797	243	0.9378654	243	0.9933668	243	0.964827	243	0.9343681	243	0.9772506	243	1.009938	243	-0.2195404	242.99	-0.2301304	242.99	-0.2486836	242.99	-0.1969463	242.99	-0.1720631	242.99	-0.1951728	242.99	-0.1626431	242.99	-0.1525213	242.99	-0.2137238
243.2	0.9729421	243.2	0.9445648	243.2	0.9938114	243.2	0.9629444	243.2	0.9357769	243.2	0.9728786	243.2	1.013168	243.2	-0.2211258	243.19	-0.2328421	243.19	-0.2510872	243.19	-0.198222	243.19	-0.1785427	243.19	-0.1970893	243.19	-0.1641836	243.19	-0.1567835	243.19	-0.2112086
243.4	0.9726334	243.4	0.9461794	243.4	0.9918204	243.4	0.9679852	243.4	0.9294223	243.4	0.9753209	243.4	1.011114	243.4	-0.2150992	243.39	-0.2316589	243.39	-0.243492	243.39	-0.1973802	243.39	-0.178148	243.39	-0.1946729	243.39	-0.1667905	243.39	-0.1513359	243.39	-0.2122349
243.6	0.9767422	243.6	0.9401613	243.6	0.9969066	243.6	0.9687589	243.6	0.9351575	243.6	0.9751706	243.6	1.009713	243.6	-0.2159954	243.6	-0.2308683	243.6	-0.2471067	243.6	-0.1972274	243.6	-0.1769082	243.6	-0.196775	243.6	-0.1654812	243.6	-0.1542216	243.6	-0.2136349
243.8	0.9728981	243.8	0.9465787	243.8	0.9981502	243.8	0.9594132	243.8	0.9301975	243.8	0.9759452	243.8	1.007591	243.8	-0.2136977	243.79	-0.2337372	243.79	-0.2454049	243.79	-0.196957	243.79	-0.1768137	243.79	-0.1965899	243.79	-0.1674381	243.79	-0.1526965	243.79	-0.2104838
244	0.9694036	244	0.9386086	244	0.9917325	244	0.9615911	244	0.9348636	244	0.9748436	244	1.009385	244	-0.2188871	244	-0.2345601	244	-0.2435955	244	-0.1987714	244	-0.1755017	244	-0.1928716	244	-0.1660242	244	-0.15456	244	-0.2126397
244.2	0.9721773	244.2	0.9387056	244.2	0.9967656	244.2	0.967056	244.2	0.9347552	244.2	0.9740947	244.2	1.008343	244.2	-0.219638	244.19	-0.2277235	244.19	-0.2457014	244.19	-0.1990873	244.19	-0.1785391	244.19	-0.1954224	244.19	-0.1668261	244.19	-0.1500938	244.19	-0.2140847
244.4	0.9734896	244.4	0.9449239	244.4	0.9962417	244.4	0.964538	244.4	0.9321413	244.4	0.9799162	244.4	1.010095	244.4	-0.214432	244.39	-0.233567	244.39	-0.2480537	244.39	-0.1974289	244.39	-0.1752463	244.39	-0.1941633	244.39	-0.1596072	244.39	-0.1519793	244.39	-0.2133703
244.6	0.9676875	244.6	0.9419261	244.6	0.992586	244.6	0.9630848	244.6	0.9332413	244.6	0.9752625	244.6	1.010012	244.6	-0.2140445	244.59	-0.232379	244.59	-0.244351	244.59	-0.1984822	244.59	-0.1743063	244.59	-0.1930887	244.59	-0.160354	244.59	-0.1526291	244.59	-0.2140919
244.8	0.9773048	244.8	0.9385269	244.8	0.9967893	244.8	0.9623185	244.8	0.9351417	244.8	0.9781603	244.8	1.012575	244.8	-0.2207956	244.8	-0.2344932	244.8	-0.244093	244.8	-0.1980353	244.8	-0.1735605	244.8	-0.1974755	244.8	-0.1643118	244.8	-0.15407	244.8	-0.2094285
245	0.9708825	245	0.9483366	245	0.992945	245	0.9687853	245	0.937133	245	0.975963	245	1.011114	245	-0.214849	244.99	-0.2253103	244.99	-0.2481768	244.99	-0.1999879	244.99	-0.1781086	244.99	-0.1934787	244.99	-0.160974	244.99	-0.1528628	244.99	-0.2099558
245.2	0.9732801	245.2	0.9374226	245.2	0.9935385	245.2	0.9674041	245.2	0.9366567	245.2	0.9764324	245.2	1.00567	245.2	-0.2137962	245.2	-0.2330357	245.2	-0.2420903	245.2	-0.1974368	245.2	-0.173111	245.2	-0.1919491	245.2	-0.1652634	245.2	-0.1517539	245.2	-0.2076095
245.4	0.9739999	245.4	0.9413003	245.4	0.9945053	245.4	0.9639893	245.4	0.935456	245.4	0.9812298	245.4	1.009303	245.4	-0.2201999	245.4	-0.2309582	245.4	-0.2452492	245.4	-0.1941833	245.4	-0.1727058	245.4	-0.1940024	245.4	-0.1612814	245.4	-0.1506405	245.4	-0.2083167
245.6	0.9774848	245.6	0.9446894	245.6	0.9921349	245.6	0.964791	245.6	0.9356889	245.6	0.9736921	245.6	1.010636	245.6	-0.2152251	245.59	-0.2265159	245.59	-0.2394288	245.59	-0.1962117	245.59	-0.1739351	245.59	-0.1914519	245.59	-0.1627589	245.59	-0.1580418	245.59	-0.2134021
245.8	0.9737496	245.8	0.9439285	245.8	0.9945475	245.8	0.9627907	245.8	0.935934	245.8	0.9791428	245.8	1.010474	245.8	-0.2171584	245.79	-0.2287463	245.79	-0.248256	245.79	-0.1960923	245.79	-0.1765266	245.79	-0.1921788	245.79	-0.1650955	245.79	-0.1552525	245.79	-0.2111617
246	0.9773455	246	0.94709	246	0.9912233	246	0.9644299	246	0.9346845	246	0.9777898	246	1.003537	246	-0.2160099	245.99	-0.2262465	245.99	-0.2466398	245.99	-0.1952379	245.99	-0.1750473	245.99	-0.1924375	245.99	-0.1606477	245.99	-0.1525412	245.99	-0.2128339
246.2	0.9738953	246.2	0.9447646	246.2	0.998072	246.2	0.9644178	246.2	0.9340737	246.2	0.9793882	246.2	1.009182	246.2	-0.2169089	246.2	-0.2308047	246.2	-0.2425752	246.2	-0.192939	246.2	-0.1717451	246.2	-0.1930211	246.2	-0.1635685	246.2	-0.1568559	246.2	-0.2099752
246.4	0.9727181	246.4	0.9414232	246.4	0.9958231	246.4	0.9637057	246.4	0.9375982	246.4	0.9792247	246.4	1.009687	246.4	-0.2188999	246.4	-0.227678	246.4	-0.2397457	246.4	-0.191831	246.4	-0.1787386	246.4	-0.1928426	246.4	-0.1627566	246.4	-0.1549552	246.4	-0.2122993
246.6	0.9757599	246.6	0.9426606	246.6	0.997726	246.6	0.9652492	246.6	0.9356869	246.6	0.977398	246.6	1.00994	246.6	-0.2178614	246.59	-0.2306657	246.59	-0.2465007	246.59	-0.1923161	246.59	-0.1780111	246.59	-0.1950373	246.59	-0.1589693	246.59	-0.1538865	246.59	-0.2084657
246.8	0.9681233	246.8	0.9491718	246.8	0.9968262	246.8	0.9647529	246.8	0.9370904	246.8	0.9824795	246.8	1.012855	246.8	-0.2165422	246.8	-0.2254976	246.8	-0.2467895	246.8	-0.1949539	246.8	-0.1748422	246.8	-0.1923716	246.8	-0.1637944	246.8	-0.1517209	246.8	-0.2155252
247	0.974294	247	0.9402919	247	0.9930982	247	0.9653587	247	0.9381259	247	0.9798881	247	1.009753	247	-0.2153085	246.99	-0.2276813	246.99	-0.2405081	246.99	-0.1954971	246.99	-0.1724476	246.99	-0.189727	246.99	-0.1609589	246.99	-0.151637	246.99	-0.2090205
247.2	0.978815	247.2	0.9494279	247.2	0.992728	247.2	0.9607351	247.2	0.940343	247.2	0.9816937	247.2	1.012415	247.2	-0.2138285	247.19	-0.2278272	247.19	-0.2468591	247.19	-0.1946146	247.19	-0.1735483	247.19	-0.1942748	247.19	-0.1587676	247.19	-0.1510518	247.19	-0.2089312
247.4	0.9747536	247.4	0.9448279	247.4	0.9976394	247.4	0.9676982	247.4	0.9355827	247.4	0.9798099	247.4	1.01319	247.4	-0.2143089	247.39	-0.2212381	247.39	-0.2418344	247.39	-0.1954732	247.39	-0.1792715	247.39	-0.1878432	247.39	-0.1603169	247.39	-0.1539993	247.39	-0.2070944
247.6	0.9742478	247.6	0.9390734	247.6	0.9946699	247.6	0.9654195	247.6	0.9378593	247.6	0.9804308	247.6	1.018942	247.6	-0.2110559	247.59	-0.2283017	247.59	-0.2404037	247.59	-0.1947764	247.59	-0.1767893	247.59	-0.1915288	247.59	-0.1647363	247.59	-0.1548769	247.59	-0.2100375
247.8	0.9754272	247.8	0.9454998	247.8	0.994005	247.8	0.9649658	247.8	0.9322595	247.8	0.9797617	247.8	1.007176	247.8	-0.2163125	247.8	-0.2315196	247.8	-0.2452236	247.8	-0.1951763	247.8	-0.174462	247.8	-0.1930189	247.8	-0.1604291	247.8	-0.1533604	247.8	-0.2093012
248	0.9804469	248	0.9450809	248	0.9953784	248	0.9704662	248	0.940901	248	0.979898	248	1.013715	248	-0.2128801	248	-0.2250752	248	-0.2410837	248	-0.1959921	248	-0.1740187	248	-0.1878871	248	-0.1605866	248	-0.1498799	248	-0.2080071
248.2	0.9766207	248.2	0.9462806	248.2	0.9961386	248.2	0.9672294	248.2	0.9377754	248.2	0.9782932	248.2	1.007484	248.2	-0.2109918	248.2	-0.2269143	248.2	-0.2429003	248.2	-0.197324	248.2	-0.1767188	248.2	-0.1883872	248.2	-0.1580122	248.2	-0.1510449	248.2	-0.2101977
248.4	0.9730242	248.4	0.9441921	248.4	0.9965448	248.4	0.9690968	248.4	0.9368138	248.4	0.9813609	248.4	1.00834	248.4	-0.219552	248.39	-0.2269999	248.39	-0.2410588	248.39	-0.1903162	248.39	-0.1761763	248.39	-0.1914631	248.39	-0.1557636	248.39	-0.1515825	248.39	-0.207386
248.6	0.9756675	248.6	0.9486912	248.6	0.9986045	248.6	0.96794	248.6	0.9346204	248.6	0.9839497	248.6	1.009578	248.6	-0.2149543	248.59	-0.2307282	248.59	-0.2372983	248.59	-0.1969209	248.59	-0.1734283	248.59	-0.1910673	248.59	-0.1619304	248.59	-0.1531544	248.59	-0.211296
248.8	0.9754122	248.8	0.9466848	248.8	0.9964617	248.8	0.9660986	248.8	0.9382296	248.8	0.9758003	248.8	1.012889	248.8	-0.2151402	248.8	-0.2284061	248.8	-0.2440526	248.8	-0.195735	248.8	-0.1701004	248.8	-0.1906154	248.8	-0.1584603	248.8	-0.1489015	248.8	-0.2062316
249	0.974011	249	0.9485546	249	1.000351	249	0.9637883	249	0.9355221	249	0.9780097	249	1.015706	249	-0.2149484	249	-0.2245841	249	-0.2389585	249	-0.1932661	249	-0.1678558	249	-0.1893028	249	-0.1596662	249	-0.1494858	249	-0.210481
249.2	0.9753086	249.2	0.9459803	249.2	0.9972483	249.2	0.964112	249.2	0.9346747	249.2	0.9827669	249.2	1.008556	249.2	-0.2149124	249.2	-0.2246943	249.2	-0.2410899	249.2	-0.1981135	249.2	-0.1755278	249.2	-0.1913715	249.2	-0.1590269	249.2	-0.1483814	249.2	-0.2108008
249.4	0.976014	249.4	0.9468533	249.4	1.000238	249.4	0.9694128	249.4	0.9384259	249.4	0.9810886	249.4	1.01332	249.4	-0.2165101	249.4	-0.2234138	249.4	-0.2416919	249.4	-0.1973654	249.4	-0.1721722	249.4	-0.1903717	249.4	-0.1560637	249.4	-0.1523915	249.4	-0.2095045
249.6	0.9784631	249.6	0.9503417	249.6	0.9988848	249.6	0.9660189	249.6	0.93743	249.6	0.9806547	249.6	1.019337	249.6	-0.2070952	249.61	-0.2264462	249.61	-0.2418339	249.61	-0.1928588	249.61	-0.1739466	249.61	-0.1861966	249.61	-0.1583471	249.61	-0.1500659	249.61	-0.2094336
249.8	0.9767148	249.8	0.9431588	249.8	1.000083	249.8	0.9651871	249.8	0.9369135	249.8	0.9825039	249.8	1.013477	249.8	-0.21851	249.8	-0.2278952	249.8	-0.2403723	249.8	-0.1969703	249.8	-0.1716996	249.8	-0.1898526	249.8	-0.1606088	249.8	-0.1535325	249.8	-0.2132416
250	0.976647	250	0.9468633	250	0.9981788	250	0.9663012	250	0.9380587	250	0.9834752	250	1.010999	250	-0.2122921	250	-0.2249136	250	-0.2437851	250	-0.1914927	250	-0.1692431	250	-0.1902955	250	-0.1592777	250	-0.1499995	250	-0.2085208
250.2	0.9728138	250.2	0.9465953	250.2	1.000194	250.2	0.9654618	250.2	0.9369688	250.2	0.9813693	250.2	1.016479	250.2	-0.2163281	250.2	-0.2310282	250.2	-0.2418568	250.2	-0.1917091	250.2	-0.1706069	250.2	-0.1906863	250.2	-0.1623248	250.2	-0.1522157	250.2	-0.2074827
250.4	0.9777941	250.4	0.9444953	250.4	0.9938349	250.4	0.9654908	250.4	0.939852	250.4	0.9796895	250.4	1.013135	250.4	-0.2136379	250.4	-0.226407	250.4	-0.2385159	250.4	-0.1931923	250.4	-0.1713033	250.4	-0.18866	250.4	-0.1579772	250.4	-0.15092	250.4	-0.2092139
250.6	0.9775468	250.6	0.9474798	250.6	0.9956948	250.6	0.9697611	250.6	0.9404312	250.6	0.978592	250.6	1.014297	250.6	-0.2110625	250.6	-0.2284739	250.6	-0.2358197	250.6	-0.1918937	250.6	-0.1709937	250.6	-0.1930243	250.6	-0.1573897	250.6	-0.149451	250.6	-0.2088363
250.8	0.9746553	250.8	0.944625	250.8	0.9982891	250.8	0.9735715	250.8	0.9392768	250.8	0.9823941	250.8	1.012936	250.8	-0.2150777	250.8	-0.2248238	250.8	-0.2453707	250.8	-0.190745	250.8	-0.1699004	250.8	-0.1876138	250.8	-0.1595216	250.8	-0.1508654	250.8	-0.210148
251	0.9834482	251	0.9495731	251	0.9997436	251	0.9731616	251	0.9326237	251	0.9791709	251	1.013905	251	-0.214418	251	-0.2247243	251	-0.2411724	251	-0.1893837	251	-0.1698314	251	-0.1880908	251	-0.1570187	251	-0.1479802	251	-0.2086877
251.2	0.9782996	251.2	0.9520287	251.2	1.00162	251.2	0.9706515	251.2	0.9406251	251.2	0.9831183	251.2	1.014815	251.2	-0.2140276	251.2	-0.227453	251.2	-0.2440057	251.2	-0.1944542	251.2	-0.1793526	251.2	-0.1890523	251.2	-0.1602827	251.2	-0.1549595	251.2	-0.2062927
251.4	0.9836175	251.4	0.9508872	251.4	0.9981489	251.4	0.9652854	251.4	0.9410885	251.4	0.9831535	251.4	1.01798	251.4	-0.2090752	251.4	-0.2277997	251.4	-0.2394826	251.4	-0.1922985	251.4	-0.1685065	251.4	-0.1881667	251.4	-0.1593959	251.4	-0.1488127	251.4	-0.2072312
251.6	0.9771413	251.6	0.9426374	251.6	0.9965224	251.6	0.9703193	251.6	0.938343	251.6	0.983113	251.6	1.011675	251.6	-0.2148274	251.6	-0.2272587	251.6	-0.2372048	251.6	-0.1908834	251.6	-0.1712056	251.6	-0.1888621	251.6	-0.1591786	251.6	-0.1461646	251.6	-0.2068081
251.8	0.9796572	251.8	0.9501254	251.8	1.000783	251.8	0.970436	251.8	0.9400762	251.8	0.9790505	251.8	1.012427	251.8	-0.2115785	251.8	-0.2241165	251.8	-0.2433789	251.8	-0.1918589	251.8	-0.1719466	251.8	-0.1902864	251.8	-0.1515525	251.8	-0.1464118	251.8	-0.2074632
252	0.9824126	252	0.9481943	252	1.001806	252	0.9671953	252	0.9386626	252	0.9787328	252	1.015529	252	-0.2112672	252	-0.2269629	252	-0.2426165	252	-0.1936488	252	-0.1668191	252	-0.1871763	252	-0.1582853	252	-0.1481378	252	-0.2115389
252.2	0.9819317	252.2	0.94824	252.2	0.9972734	252.2	0.9672207	252.2	0.9429736	252.2	0.9786285	252.2	1.016554	252.2	-0.2132158	252.2	-0.2256584	252.2	-0.2425853	252.2	-0.1937805	252.2	-0.1681819	252.2	-0.1879982	252.2	-0.1557367	252.2	-0.1494352	252.2	-0.2102708
252.4	0.9834978	252.4	0.948728	252.4	1.00429	252.4	0.9704413	252.4	0.9404805	252.4	0.9805322	252.4	1.01298	252.4	-0.2139427	252.4	-0.2243605	252.4	-0.2369918	252.4	-0.1898381	252.4	-0.1711345	252.4	-0.1872469	252.4	-0.1563831	252.4	-0.1471797	252.4	-0.2049476
252.6	0.9787355	252.6	0.9523272	252.6	1.000522	252.6	0.9669745	252.6	0.9424024	252.6	0.9808976	252.6	1.017032	252.6	-0.211315	252.6	-0.2270591	252.6	-0.2441071	252.6	-0.1921636	252.6	-0.1654103	252.6	-0.1895725	252.6	-0.1546177	252.6	-0.149939	252.6	-0.2076955
252.8	0.9732357	252.8	0.9484318	252.8	0.9997534	252.8	0.9666507	252.8	0.9380183	252.8	0.983551	252.8	1.018585	252.8	-0.212749	252.8	-0.2208803	252.8	-0.2388828	252.8	-0.1910377	252.8	-0.1679256	252.8	-0.1876964	252.8	-0.1565166	252.8	-0.1511054	252.8	-0.2040678
253	0.9737491	253	0.947329	253	0.99851	253	0.9734616	253	0.9397626	253	0.9838769	253	1.017628	253	-0.2135064	252.99	-0.2248797	252.99	-0.2448632	252.99	-0.1888145	252.99	-0.1677758	252.99	-0.1887162	252.99	-0.1597071	252.99	-0.1444032	252.99	-0.2105236
253.2	0.9763919	253.2	0.9512346	253.2	1.002816	253.2	0.9705997	253.2	0.9420297	253.2	0.9817055	253.2	1.016411	253.2	-0.2128689	253.2	-0.2241287	253.2	-0.2401042	253.2	-0.1938268	253.2	-0.1721609	253.2	-0.1874484	253.2	-0.1544966	253.2	-0.1461537	253.2	-0.2023031
253.4	0.9794681	253.4	0.9457356	253.4	1.00029	253.4	0.9688017	253.4	0.9393876	253.4	0.9815069	253.4	1.01656	253.4	-0.211604	253.4	-0.2239665	253.4	-0.2415765	253.4	-0.1891385	253.4	-0.1686533	253.4	-0.1884711	253.4	-0.1587504	253.4	-0.1526703	253.4	-0.2097118
253.6	0.9802596	253.6	0.9474013	253.6	1.00246	253.6	0.9722817	253.6	0.9435431	253.6	0.9824938	253.6	1.01775	253.6	-0.2137231	253.6	-0.2190166	253.6	-0.2425865	253.6	-0.1894179	253.6	-0.1733151	253.6	-0.1880873	253.6	-0.1618787	253.6	-0.1472824	253.6	-0.203646
253.8	0.983577	253.8	0.9461606	253.8	0.9970885	253.8	0.9689914	253.8	0.9406046	253.8	0.9804494	253.8	1.019137	253.8	-0.2096733	253.8	-0.2257127	253.8	-0.2351419	253.8	-0.1909091	253.8	-0.1673145	253.8	-0.1886854	253.8	-0.1530664	253.8	-0.1438029	253.8	-0.2092112
254	0.9769582	254	0.947579	254	1.005646	254	0.9685177	254	0.9403608	254	0.9858037	254	1.017732	254	-0.2139754	254	-0.2281674	254	-0.2405408	254	-0.192429	254	-0.165261	254	-0.1838126	254	-0.159254	254	-0.1506586	254	-0.2032232
254.2	0.9811569	254.2	0.9442236	254.2	1.00236	254.2	0.9702458	254.2	0.9405643	254.2	0.9849567	254.2	1.01685	254.2	-0.2152824	254.2	-0.2232343	254.2	-0.2396757	254.2	-0.186621	254.2	-0.1730398	254.2	-0.1871465	254.2	-0.151605	254.2	-0.150195	254.2	-0.2070462
254.4	0.9786972	254.4	0.9537488	254.4	1.003904	254.4	0.9713862	254.4	0.9426868	254.4	0.9874549	254.4	1.015857	254.4	-0.2101602	254.4	-0.2209477	254.4	-0.2422262	254.4	-0.192424	254.4	-0.168907	254.4	-0.1882181	254.4	-0.158119	254.4	-0.1433599	254.4	-0.2017486
254.6	0.9734933	254.6	0.946976	254.6	1.001633	254.6	0.9721055	254.6	0.9398717	254.6	0.9836662	254.6	1.015337	254.6	-0.2127444	254.6	-0.2242543	254.6	-0.2401036	254.6	-0.1872674	254.6	-0.1699106	254.6	-0.1891347	254.6	-0.1579376	254.6	-0.1472449	254.6	-0.2052708
254.8	0.9781896	254.8	0.9461855	254.8	1.002874	254.8	0.973282	254.8	0.9381175	254.8	0.9899799	254.8	1.01645	254.8	-0.2132728	254.79	-0.221201	254.79	-0.2383224	254.79	-0.1952795	254.79	-0.1724171	254.79	-0.1877156	254.79	-0.1578237	254.79	-0.1496655	254.79	-0.2046819
255	0.9753641	255	0.9496884	255	1.000936	255	0.9680936	255	0.9463547	255	0.9838184	255	1.014523	255	-0.2121498	255	-0.2171469	255	-0.237087	255	-0.1874287	255	-0.1652718	255	-0.1870132	255	-0.15518	255	-0.1455727	255	-0.2049082
255.2	0.980644	255.2	0.948672	255.2	0.9995169	255.2	0.9744407	255.2	0.939187	255.2	0.9837021	255.2	1.019147	255.2	-0.2103048	255.2	-0.2219005	255.2	-0.2356743	255.2	-0.1900816	255.2	-0.1661385	255.2	-0.1827785	255.2	-0.1529616	255.2	-0.1438875	255.2	-0.2050477
255.4	0.9844888	255.4	0.9493934	255.4	0.9983494	255.4	0.9703959	255.4	0.9416913	255.4	0.9854214	255.4	1.016627	255.4	-0.2092579	255.4	-0.2251026	255.4	-0.2341494	255.4	-0.1898132	255.4	-0.1684574	255.4	-0.1899015	255.4	-0.1533313	255.4	-0.1441136	255.4	-0.2083747
255.6	0.9796627	255.6	0.9483838	255.6	0.9996237	255.6	0.9726503	255.6	0.9410219	255.6	0.9851375	255.6	1.017783	255.6	-0.2123581	255.6	-0.2231555	255.6	-0.2382905	255.6	-0.1899864	255.6	-0.168074	255.6	-0.1887107	255.6	-0.1537898	255.6	-0.1443121	255.6	-0.2057137
255.8	0.9779523	255.8	0.9497315	255.8	1.00362	255.8	0.9702147	255.8	0.9427523	255.8	0.9841907	255.8	1.016867	255.8	-0.2124176	255.8	-0.2227546	255.8	-0.2324649	255.8	-0.1924622	255.8	-0.1677013	255.8	-0.1858356	255.8	-0.1595485	255.8	-0.1441427	255.8	-0.1997327
256	0.9764619	256	0.9499471	256	1.000361	256	0.9730633	256	0.9386934	256	0.9825505	256	1.014757	256	-0.2092797	256	-0.220465	256	-0.2360669	256	-0.1864594	256	-0.1678468	256	-0.1841857	256	-0.1546645	256	-0.1453108	256	-0.2044488
256.2	0.982965	256.2	0.9505516	256.2	0.9983894	256.2	0.9696568	256.2	0.9468216	256.2	0.9863209	256.2	1.01736	256.2	-0.2100545	256.2	-0.2210421	256.2	-0.2364117	256.2	-0.1884043	256.2	-0.1666886	256.2	-0.1892371	256.2	-0.1567731	256.2	-0.1383981	256.2	-0.2075811
256.4	0.9821529	256.4	0.9497009	256.4	1.00446	256.4	0.9706638	256.4	0.9439273	256.4	0.9817306	256.4	1.019397	256.4	-0.2145693	256.4	-0.2222801	256.4	-0.2353004	256.4	-0.1888435	256.4	-0.1664685	256.4	-0.1846495	256.4	-0.1520758	256.4	-0.1446446	256.4	-0.2040445
256.6	0.9770221	256.6	0.9482393	256.6	0.9995824	256.6	0.9733418	256.6	0.9447043	256.6	0.9845889	256.6	1.023055	256.6	-0.211675	256.59	-0.218966	256.59	-0.238727	256.59	-0.1880008	256.59	-0.1682785	256.59	-0.1838108	256.59	-0.1540013	256.59	-0.1451044	256.59	-0.2010271
256.8	0.9838703	256.8	0.9483727	256.8	0.9950455	256.8	0.9675826	256.8	0.944366	256.8	0.9824181	256.8	1.017887	256.8	-0.2108881	256.8	-0.2229379	256.8	-0.2360748	256.8	-0.1874348	256.8	-0.168398	256.8	-0.1838606	256.8	-0.1565921	256.8	-0.1454328	256.8	-0.2034565
257	0.9837791	257	0.9476062	257	1.004696	257	0.9797593	257	0.9418458	257	0.9864857	257	1.020527	257	-0.2096865	257	-0.2224327	257	-0.2371189	257	-0.187084	257	-0.1635922	257	-0.1836166	257	-0.1539212	257	-0.1393342	257	-0.2058229
257.2	0.975777	257.2	0.9563557	257.2	1.004932	257.2	0.9702207	257.2	0.9424145	257.2	0.98348	257.2	1.022533	257.2	-0.2107748	257.2	-0.2201817	257.2	-0.2374619	257.2	-0.1890936	257.2	-0.1718957	257.2	-0.1839726	257.2	-0.155869	257.2	-0.1430309	257.2	-0.2024487
257.4	0.9846557	257.4	0.956444	257.4	1.005699	257.4	0.9751801	257.4	0.9411233	257.4	0.9857245	257.4	1.018648	257.4	-0.2090283	257.4	-0.220417	257.4	-0.2362164	257.4	-0.1873676	257.4	-0.1684491	257.4	-0.190102	257.4	-0.1513361	257.4	-0.1436176	257.4	-0.2033627
257.6	0.9800009	257.6	0.9512752	257.6	1.001239	257.6	0.9761287	257.6	0.9453667	257.6	0.9853251	257.6	1.022157	257.6	-0.2087901	257.59	-0.2216636	257.59	-0.2369264	257.59	-0.1895266	257.59	-0.1623551	257.59	-0.1858564	257.59	-0.1533958	257.59	-0.1457504	257.59	-0.2046947
257.8	0.9803709	257.8	0.9498696	257.8	1.003093	257.8	0.9749934	257.8	0.9378765	257.8	0.9833133	257.8	1.023128	257.8	-0.2064197	257.8	-0.2238568	257.8	-0.2365609	257.8	-0.1855496	257.8	-0.162494	257.8	-0.1847576	257.8	-0.1549182	257.8	-0.1502687	257.8	-0.2057558
258	0.9838263	258	0.9506488	258	1.005256	258	0.9688926	258	0.9431958	258	0.9863181	258	1.021175	258	-0.2132372	258	-0.2268116	258	-0.2350291	258	-0.1864212	258	-0.1640425	258	-0.183078	258	-0.1527153	258	-0.1441631	258	-0.198927
258.2	0.9802942	258.2	0.9535322	258.2	1.005286	258.2	0.9694245	258.2	0.9408546	258.2	0.9889925	258.2	1.0177	258.2	-0.2121975	258.2	-0.2188688	258.2	-0.2356888	258.2	-0.1877193	258.2	-0.1606858	258.2	-0.1857613	258.2	-0.153417	258.2	-0.1438369	258.2	-0.2002407
258.4	0.9828805	258.4	0.9529121	258.4	1.000876	258.4	0.9735776	258.4	0.9426115	258.4	0.9858812	258.4	1.019331	258.4	-0.2059055	258.4	-0.2197864	258.4	-0.2354794	258.4	-0.1833207	258.4	-0.1672399	258.4	-0.1827031	258.4	-0.1518821	258.4	-0.1424537	258.4	-0.205497
258.6	0.9788413	258.6	0.9483603	258.6	1.004035	258.6	0.9753771	258.6	0.9473391	258.6	0.9868603	258.6	1.020712	258.6	-0.2084254	258.6	-0.2226712	258.6	-0.2392749	258.6	-0.186596	258.6	-0.1718212	258.6	-0.1867538	258.6	-0.1514761	258.6	-0.1424927	258.6	-0.2050678
258.8	0.9812481	258.8	0.9528731	258.8	1.002961	258.8	0.9706054	258.8	0.9432169	258.8	0.9852902	258.8	1.020957	258.8	-0.2082807	258.8	-0.2231831	258.8	-0.2395378	258.8	-0.1836687	258.8	-0.1677805	258.8	-0.184951	258.8	-0.1545611	258.8	-0.1396797	258.8	-0.2040935
259	0.9847436	259	0.9514648	259	1.005151	259	0.9696438	259	0.9398847	259	0.9892101	259	1.017893	259	-0.2081617	259	-0.2207562	259	-0.2323752	259	-0.1857798	259	-0.1677761	259	-0.1866138	259	-0.151681	259	-0.1455673	259	-0.2033264
259.2	0.9821166	259.2	0.9556281	259.2	1.004399	259.2	0.968143	259.2	0.9421017	259.2	0.9866642	259.2	1.022158	259.2	-0.2098245	259.2	-0.2177453	259.2	-0.2353393	259.2	-0.1868881	259.2	-0.1669595	259.2	-0.1823419	259.2	-0.1492741	259.2	-0.1481581	259.2	-0.2072695
259.4	0.9857151	259.4	0.9537721	259.4	1.007374	259.4	0.9766002	259.4	0.9371114	259.4	0.9849923	259.4	1.018761	259.4	-0.2104366	259.39	-0.220703	259.39	-0.2351295	259.39	-0.1864493	259.39	-0.1681286	259.39	-0.1826799	259.39	-0.157071	259.39	-0.142905	259.39	-0.2016539
259.6	0.9814405	259.6	0.9577631	259.6	1.002111	259.6	0.9715621	259.6	0.9390758	259.6	0.987628	259.6	1.021841	259.6	-0.2059969	259.6	-0.2191048	259.6	-0.2346535	259.6	-0.1848351	259.6	-0.1619216	259.6	-0.1868995	259.6	-0.153343	259.6	-0.1452568	259.6	-0.201498
259.8	0.9812396	259.8	0.9508317	259.8	1.001654	259.8	0.9790285	259.8	0.9415154	259.8	0.9858189	259.8	1.019572	259.8	-0.210815	259.79	-0.2201422	259.79	-0.2351843	259.79	-0.1834963	259.79	-0.1656509	259.79	-0.1801603	259.79	-0.1538002	259.79	-0.1434989	259.79	-0.2070384
260	0.9834516	260	0.9510057	260	1.001058	260	0.9757076	260	0.941124	260	0.9830799	260	1.022786	260	-0.2108613	260	-0.2216159	260	-0.2369792	260	-0.183118	260	-0.1613548	260	-0.1814392	260	-0.1487507	260	-0.1470762	260	-0.2019516
260.2	0.9801822	260.2	0.9523264	260.2	1.002919	260.2	0.9746279	260.2	0.9446413	260.2	0.9898781	260.2	1.015144	260.2	-0.21194	260.19	-0.2195518	260.19	-0.2299117	260.19	-0.1830937	260.19	-0.1639831	260.19	-0.1785639	260.19	-0.1493866	260.19	-0.1444568	260.19	-0.2016101
260.4	0.9837405	260.4	0.9541035	260.4	1.006431	260.4	0.9747103	260.4	0.9444988	260.4	0.9843642	260.4	1.020056	260.4	-0.2083017	260.39	-0.2212948	260.39	-0.2339705	260.39	-0.1875125	260.39	-0.1659435	260.39	-0.1820946	260.39	-0.1501947	260.39	-0.1403219	260.39	-0.204341
260.6	0.9866376	260.6	0.9497215	260.6	1.001739	260.6	0.9774688	260.6	0.9422666	260.6	0.9869993	260.6	1.021351	260.6	-0.211135	260.59	-0.2219626	260.59	-0.2332167	260.59	-0.1846608	260.59	-0.1649036	260.59	-0.183295	260.59	-0.1529166	260.59	-0.1441176	260.59	-0.2041255
260.8	0.9850453	260.8	0.9543406	260.8	1.002329	260.8	0.9763938	260.8	0.9440068	260.8	0.9867868	260.8	1.019635	260.8	-0.2081172	260.8	-0.2204575	260.8	-0.2345871	260.8	-0.1829957	260.8	-0.1638269	260.8	-0.1847349	260.8	-0.1516806	260.8	-0.1431091	260.8	-0.1986935
261	0.9829158	261	0.9608638	261	1.003615	261	0.970273	261	0.9462007	261	0.9823872	261	1.016791	261	-0.2075823	260.99	-0.2193664	260.99	-0.237914	260.99	-0.1839626	260.99	-0.1619623	260.99	-0.1825042	260.99	-0.1536062	260.99	-0.1381994	260.99	-0.201047
261.2	0.9867256	261.2	0.955819	261.2	1.007064	261.2	0.9753429	261.2	0.9432659	261.2	0.9856785	261.2	1.016321	261.2	-0.2092293	261.19	-0.2188666	261.19	-0.2330864	261.19	-0.184317	261.19	-0.1617465	261.19	-0.1840926	261.19	-0.1556744	261.19	-0.1424629	261.19	-0.2035789
261.4	0.985866	261.4	0.9513005	261.4	1.00524	261.4	0.9700547	261.4	0.9456954	261.4	0.9888208	261.4	1.019591	261.4	-0.2066481	261.4	-0.2143396	261.4	-0.233919	261.4	-0.1851034	261.4	-0.1636205	261.4	-0.1828101	261.4	-0.1544938	261.4	-0.1425436	261.4	-0.2008686
261.6	0.9832584	261.6	0.9559528	261.6	1.00428	261.6	0.9753403	261.6	0.942636	261.6	0.9887651	261.6	1.017796	261.6	-0.2092923	261.6	-0.2201512	261.6	-0.2360569	261.6	-0.1874386	261.6	-0.1629459	261.6	-0.1848571	261.6	-0.1495422	261.6	-0.1399961	261.6	-0.2040424
261.8	0.9787052	261.8	0.9503134	261.8	1.004491	261.8	0.9773276	261.8	0.9490858	261.8	0.9894826	261.8	1.015077	261.8	-0.2090762	261.8	-0.2155764	261.8	-0.2358632	261.8	-0.18074	261.8	-0.167964	261.8	-0.1805374	261.8	-0.1526903	261.8	-0.1424715	261.8	-0.2012151
262	0.9852124	262	0.9550818	262	1.003889	262	0.9783971	262	0.947638	262	0.9886756	262	1.025907	262	-0.2080495	262	-0.2194152	262	-0.231689	262	-0.1810457	262	-0.1656497	262	-0.1822201	262	-0.1535329	262	-0.1414452	262	-0.2064304
262.2	0.9852936	262.2	0.9465448	262.2	1.006562	262.2	0.972527	262.2	0.946355	262.2	0.9870128	262.2	1.018467	262.2	-0.2065093	262.2	-0.2211751	262.2	-0.2305644	262.2	-0.1797129	262.2	-0.1635149	262.2	-0.1821954	262.2	-0.151647	262.2	-0.139548	262.2	-0.2017309
262.4	0.9838499	262.4	0.9517292	262.4	1.00618	262.4	0.9761229	262.4	0.94932	262.4	0.9872532	262.4	1.020945	262.4	-0.2106431	262.4	-0.2158295	262.4	-0.2305554	262.4	-0.1830764	262.4	-0.1637263	262.4	-0.1837007	262.4	-0.1489131	262.4	-0.1397172	262.4	-0.1990459
262.6	0.9854413	262.6	0.9539058	262.6	1.009724	262.6	0.9739407	262.6	0.9447208	262.6	0.9872589	262.6	1.021217	262.6	-0.210647	262.6	-0.2147046	262.6	-0.2296924	262.6	-0.1833786	262.6	-0.1662511	262.6	-0.1815471	262.6	-0.1509784	262.6	-0.1397185	262.6	-0.2016416
262.8	0.9819463	262.8	0.9532055	262.8	1.00848	262.8	0.9796951	262.8	0.9459762	262.8	0.9905679	262.8	1.020923	262.8	-0.2100049	262.8	-0.2192657	262.8	-0.234878	262.8	-0.182724	262.8	-0.164548	262.8	-0.17864	262.8	-0.148896	262.8	-0.1387767	262.8	-0.2029336
263	0.9863582	263	0.9564764	263	1.007616	263	0.9758004	263	0.949258	263	0.9855485	263	1.017667	263	-0.2067266	262.99	-0.2200826	262.99	-0.236925	262.99	-0.1842635	262.99	-0.1646001	262.99	-0.178518	262.99	-0.1505032	262.99	-0.141762	262.99	-0.2015425
263.2	0.9836356	263.2	0.9546136	263.2	1.008429	263.2	0.9768625	263.2	0.9518826	263.2	0.9870648	263.2	1.024165	263.2	-0.2056068	263.19	-0.2207713	263.19	-0.2280312	263.19	-0.1792188	263.19	-0.1652266	263.19	-0.1827213	263.19	-0.1528587	263.19	-0.1388072	263.19	-0.2011327
263.4	0.9851472	263.4	0.9517499	263.4	1.005042	263.4	0.9753643	263.4	0.9436124	263.4	0.987151	263.4	1.021371	263.4	-0.2095911	263.4	-0.2164417	263.4	-0.233988	263.4	-0.185367	263.4	-0.1683117	263.4	-0.1788994	263.4	-0.1497286	263.4	-0.1396329	263.4	-0.1968423
263.6	0.9838015	263.6	0.9520716	263.6	1.007617	263.6	0.973819	263.6	0.9474277	263.6	0.9864342	263.6	1.021908	263.6	-0.2069104	263.6	-0.219291	263.6	-0.2341484	263.6	-0.184466	263.6	-0.1626532	263.6	-0.1799716	263.6	-0.1540728	263.6	-0.1416105	263.6	-0.2014637
263.8	0.9846857	263.8	0.9568333	263.8	1.004156	263.8	0.9764804	263.8	0.9478787	263.8	0.9891941	263.8	1.023848	263.8	-0.208876	263.8	-0.2155186	263.8	-0.2343272	263.8	-0.1839782	263.8	-0.1590865	263.8	-0.1801489	263.8	-0.1504382	263.8	-0.1422818	263.8	-0.2010265
264	0.9835493	264	0.9479439	264	1.009113	264	0.9773769	264	0.9420689	264	0.9871795	264	1.022614	264	-0.2064973	263.99	-0.2211699	263.99	-0.2375156	263.99	-0.1864094	263.99	-0.1659376	263.99	-0.180916	263.99	-0.1477356	263.99	-0.1406533	263.99	-0.1986877
264.2	0.9854696	264.2	0.9556505	264.2	1.005457	264.2	0.975122	264.2	0.9456964	264.2	0.9874893	264.2	1.024424	264.2	-0.2098299	264.2	-0.2192038	264.2	-0.231172	264.2	-0.183337	264.2	-0.162713	264.2	-0.1811037	264.2	-0.1480364	264.2	-0.1383063	264.2	-0.1997597
264.4	0.9856879	264.4	0.9549622	264.4	1.006654	264.4	0.9760522	264.4	0.9502966	264.4	0.9909508	264.4	1.024068	264.4	-0.2078801	264.4	-0.2163944	264.4	-0.2289589	264.4	-0.1870302	264.4	-0.1627805	264.4	-0.1856314	264.4	-0.1471108	264.4	-0.1395665	264.4	-0.199836
264.6	0.9830108	264.6	0.9545348	264.6	1.004451	264.6	0.9754679	264.6	0.9443201	264.6	0.9894753	264.6	1.024722	264.6	-0.2104245	264.6	-0.2159905	264.6	-0.2268622	264.6	-0.181951	264.6	-0.1570907	264.6	-0.1821359	264.6	-0.1464651	264.6	-0.1375172	264.6	-0.2049616
264.8	0.9854304	264.8	0.9550117	264.8	1.006294	264.8	0.9759869	264.8	0.9481691	264.8	0.9898994	264.8	1.024233	264.8	-0.2056922	264.79	-0.2168272	264.79	-0.229667	264.79	-0.1827047	264.79	-0.1601583	264.79	-0.1769838	264.79	-0.1505025	264.79	-0.1390397	264.79	-0.2029296
265	0.9835193	265	0.954886	265	1.00603	265	0.9803524	265	0.9477668	265	0.9904662	265	1.019655	265	-0.2071672	264.99	-0.2159013	264.99	-0.2311202	264.99	-0.1847115	264.99	-0.1614537	264.99	-0.182065	264.99	-0.1499816	264.99	-0.1380665	264.99	-0.2054724
265.2	0.9877461	265.2	0.9538552	265.2	1.011383	265.2	0.9777794	265.2	0.9447043	265.2	0.9895915	265.2	1.021297	265.2	-0.2041924	265.2	-0.2155379	265.2	-0.2293174	265.2	-0.1797275	265.2	-0.1638643	265.2	-0.1783043	265.2	-0.1514658	265.2	-0.1390792	265.2	-0.1989956
265.4	0.9867421	265.4	0.9536228	265.4	1.006218	265.4	0.9711555	265.4	0.9495851	265.4	0.9955099	265.4	1.022029	265.4	-0.2053479	265.39	-0.2127246	265.39	-0.2334137	265.39	-0.1915029	265.39	-0.1651169	265.39	-0.1781459	265.39	-0.1490259	265.39	-0.1414242	265.39	-0.1974239
265.6	0.9797493	265.6	0.9549612	265.6	1.00584	265.6	0.9767638	265.6	0.9468814	265.6	0.9883308	265.6	1.026958	265.6	-0.2051896	265.59	-0.2172851	265.59	-0.2352703	265.59	-0.179865	265.59	-0.1613421	265.59	-0.1781951	265.59	-0.150446	265.59	-0.1378999	265.59	-0.2017427
265.8	0.983261	265.8	0.9573532	265.8	1.010557	265.8	0.9781613	265.8	0.9429297	265.8	0.9958575	265.8	1.023714	265.8	-0.2065828	265.79	-0.2127306	265.79	-0.2302895	265.79	-0.1810478	265.79	-0.1612769	265.79	-0.1749056	265.79	-0.1501135	265.79	-0.1423684	265.79	-0.1987622
266	0.9869424	266	0.9522155	266	1.008266	266	0.9735423	266	0.9471623	266	0.9929165	266	1.021319	266	-0.2047344	266	-0.2176889	266	-0.2305151	266	-0.1814307	266	-0.1588195	266	-0.1803716	266	-0.149937	266	-0.1370127	266	-0.1959494
266.2	0.985886	266.2	0.959681	266.2	1.007283	266.2	0.9802502	266.2	0.9493346	266.2	0.9903592	266.2	1.026999	266.2	-0.2057099	266.2	-0.2141738	266.2	-0.2293565	266.2	-0.1813699	266.2	-0.162054	266.2	-0.1791228	266.2	-0.1489508	266.2	-0.1345349	266.2	-0.198856
266.4	0.9851636	266.4	0.9515671	266.4	1.006091	266.4	0.9763217	266.4	0.9476481	266.4	0.989207	266.4	1.029374	266.4	-0.2072314	266.39	-0.2192121	266.39	-0.2328864	266.39	-0.1812448	266.39	-0.1579907	266.39	-0.1787139	266.39	-0.1510691	266.39	-0.1365498	266.39	-0.2011133
266.6	0.9891292	266.6	0.9546632	266.6	1.008206	266.6	0.9755656	266.6	0.9480903	266.6	0.9915556	266.6	1.022321	266.6	-0.2076865	266.59	-0.217757	266.59	-0.231187	266.59	-0.180583	266.59	-0.1624301	266.59	-0.180672	266.59	-0.1490165	266.59	-0.1337007	266.59	-0.1971022
266.8	0.9860052	266.8	0.9563173	266.8	1.008425	266.8	0.9806259	266.8	0.9490013	266.8	0.9899248	266.8	1.019853	266.8	-0.2092606	266.79	-0.2132393	266.79	-0.2286884	266.79	-0.1822856	266.79	-0.1636596	266.79	-0.1792756	266.79	-0.1493234	266.79	-0.1399358	266.79	-0.2017827
267	0.9870067	267	0.9556376	267	1.009939	267	0.9770859	267	0.9463787	267	0.9930433	267	1.025321	267	-0.2072461	267	-0.2150096	267	-0.2301792	267	-0.1812506	267	-0.1611354	267	-0.182818	267	-0.1460613	267	-0.1331371	267	-0.1972899
267.2	0.9890847	267.2	0.9561955	267.2	1.00918	267.2	0.9784893	267.2	0.9458594	267.2	0.9958319	267.2	1.02177	267.2	-0.2039375	267.2	-0.2190359	267.2	-0.2278163	267.2	-0.1792648	267.2	-0.1603022	267.2	-0.1818976	267.2	-0.1479071	267.2	-0.1366666	267.2	-0.2031003
267.4	0.9884783	267.4	0.9574894	267.4	1.009483	267.4	0.9772156	267.4	0.9508316	267.4	0.9902214	267.4	1.025676	267.4	-0.2044883	267.4	-0.2153475	267.4	-0.2332692	267.4	-0.1757235	267.4	-0.1568733	267.4	-0.1787615	267.4	-0.1472385	267.4	-0.1394105	267.4	-0.1992466
267.6	0.9891267	267.6	0.9556824	267.6	1.009266	267.6	0.9779169	267.6	0.9482332	267.6	0.9909273	267.6	1.025483	267.6	-0.20351	267.6	-0.2131038	267.6	-0.2287747	267.6	-0.1742425	267.6	-0.1581994	267.6	-0.1758548	267.6	-0.14735	267.6	-0.1323687	267.6	-0.1988155
267.8	0.9860695	267.8	0.9593921	267.8	1.009108	267.8	0.9742293	267.8	0.9502103	267.8	0.9898857	267.8	1.024441	267.8	-0.2019196	267.8	-0.2158487	267.8	-0.2315125	267.8	-0.1809482	267.8	-0.1643583	267.8	-0.1779948	267.8	-0.1476122	267.8	-0.1387662	267.8	-0.2015759
268	0.985239	268	0.9552805	268	1.009105	268	0.9777996	268	0.9548571	268	0.9930458	268	1.026218	268	-0.2090143	267.99	-0.2154919	267.99	-0.2273704	267.99	-0.1814144	267.99	-0.1612794	267.99	-0.1800556	267.99	-0.1497645	267.99	-0.1355905	267.99	-0.1972988
268.2	0.9808947	268.2	0.9560023	268.2	1.005505	268.2	0.9788069	268.2	0.9481353	268.2	0.9854198	268.2	1.025853	268.2	-0.2027041	268.2	-0.2162966	268.2	-0.2321292	268.2	-0.178047	268.2	-0.1574037	268.2	-0.1744591	268.2	-0.1453248	268.2	-0.1362574	268.2	-0.1976801
268.4	0.9882774	268.4	0.9587754	268.4	1.00625	268.4	0.9780558	268.4	0.9478585	268.4	0.99106	268.4	1.02138	268.4	-0.2079793	268.39	-0.2158063	268.39	-0.2288343	268.39	-0.1807839	268.39	-0.1599289	268.39	-0.1793135	268.39	-0.1488222	268.39	-0.132148	268.39	-0.2032611
268.6	0.9876413	268.6	0.9565956	268.6	1.009321	268.6	0.981861	268.6	0.9490117	268.6	0.9883832	268.6	1.028038	268.6	-0.2040509	268.6	-0.2097517	268.6	-0.2271921	268.6	-0.181703	268.6	-0.1609936	268.6	-0.1786386	268.6	-0.1478817	268.6	-0.1363782	268.6	-0.1976488
268.8	0.9913737	268.8	0.952988	268.8	1.012487	268.8	0.9807422	268.8	0.9461362	268.8	0.9947069	268.8	1.024252	268.8	-0.2040509	268.8	-0.2148367	268.8	-0.2291691	268.8	-0.1780231	268.8	-0.1601537	268.8	-0.1802473	268.8	-0.1500546	268.8	-0.134488	268.8	-0.1963145
269	0.9860604	269	0.957467	269	1.013311	269	0.9757999	269	0.9495642	269	0.9895024	269	1.028447	269	-0.1999016	269	-0.2123841	269	-0.2261916	269	-0.1809584	269	-0.1575117	269	-0.1770241	269	-0.1464064	269	-0.1364784	269	-0.1991826
269.2	0.9923106	269.2	0.9597594	269.2	1.005977	269.2	0.9804249	269.2	0.947428	269.2	0.9962494	269.2	1.02465	269.2	-0.2028146	269.19	-0.2191144	269.19	-0.2267393	269.19	-0.1846835	269.19	-0.1574842	269.19	-0.1781482	269.19	-0.1457903	269.19	-0.1358347	269.19	-0.1946657
269.4	0.9887016	269.4	0.956457	269.4	1.009792	269.4	0.9803492	269.4	0.9488451	269.4	0.9921435	269.4	1.025084	269.4	-0.2033846	269.4	-0.2136347	269.4	-0.2272441	269.4	-0.1790158	269.4	-0.1602178	269.4	-0.1759182	269.4	-0.1480413	269.4	-0.1356161	269.4	-0.1968237
269.6	0.9848848	269.6	0.956945	269.6	1.00892	269.6	0.9774762	269.6	0.9516581	269.6	0.9952356	269.6	1.028547	269.6	-0.202584	269.6	-0.208616	269.6	-0.2235747	269.6	-0.177606	269.6	-0.1619435	269.6	-0.1760778	269.6	-0.1456316	269.6	-0.1351943	269.6	-0.1955955
269.8	0.9886158	269.8	0.9551119	269.8	1.010081	269.8	0.9834385	269.8	0.9514056	269.8	0.9935684	269.8	1.030358	269.8	-0.2062254	269.8	-0.2174783	269.8	-0.2274882	269.8	-0.1805992	269.8	-0.1619966	269.8	-0.1765723	269.8	-0.1443702	269.8	-0.1372027	269.8	-0.202085
270	0.9910354	270	0.9578537	270	1.013452	270	0.9745636	270	0.9540138	270	0.9898626	270	1.027021	270	-0.1995697	269.99	-0.2157857	269.99	-0.2275187	269.99	-0.1807857	269.99	-0.1587892	269.99	-0.1764826	269.99	-0.1422143	269.99	-0.1344568	269.99	-0.1989261
270.2	0.9854056	270.2	0.9558524	270.2	1.014354	270.2	0.9792047	270.2	0.9493434	270.2	0.9923127	270.2	1.02803	270.2	-0.2043786	270.2	-0.208994	270.2	-0.2267274	270.2	-0.1793974	270.2	-0.1555737	270.2	-0.1771545	270.2	-0.1457091	270.2	-0.1336945	270.2	-0.1957824
270.4	0.9871732	270.4	0.9576662	270.4	1.008839	270.4	0.9816631	270.4	0.9455234	270.4	0.9911476	270.4	1.02482	270.4	-0.2066326	270.39	-0.2100309	270.39	-0.228815	270.39	-0.1794882	270.39	-0.1564812	270.39	-0.179919	270.39	-0.145277	270.39	-0.1365815	270.39	-0.1992246
270.6	0.9881295	270.6	0.9552577	270.6	1.013939	270.6	0.9814664	270.6	0.9507937	270.6	0.9918832	270.6	1.028757	270.6	-0.2058876	270.59	-0.2159589	270.59	-0.2285001	270.59	-0.1789369	270.59	-0.1546941	270.59	-0.1766238	270.59	-0.1453238	270.59	-0.1401246	270.59	-0.1963186
270.8	0.9823375	270.8	0.9569561	270.8	1.012571	270.8	0.9840628	270.8	0.9488286	270.8	0.9945564	270.8	1.02786	270.8	-0.204486	270.79	-0.2101628	270.79	-0.2302598	270.79	-0.180218	270.79	-0.1579694	270.79	-0.1766057	270.79	-0.1495997	270.79	-0.1328289	270.79	-0.1976657
271	0.9860985	271	0.9576331	271	1.010396	271	0.978457	271	0.9500942	271	0.9969134	271	1.025889	271	-0.2016691	270.99	-0.2070289	270.99	-0.2286266	270.99	-0.1788783	270.99	-0.159803	270.99	-0.1747384	270.99	-0.1470246	270.99	-0.1324337	270.99	-0.193731
271.22	0.9907321	271.22	0.9607544	271.22	1.013888	271.22	0.9798452	271.22	0.94954	271.22	0.9904292	271.22	1.026634	271.22	-0.2020978	271.2	-0.2107566	271.2	-0.2281257	271.2	-0.1770854	271.2	-0.1575963	271.2	-0.1743668	271.2	-0.1444712	271.2	-0.134469	271.2	-0.2002545
271.4	0.9900237	271.4	0.9584659	271.4	1.010405	271.4	0.9835886	271.4	0.9543445	271.4	0.9963866	271.4	1.025615	271.4	-0.1991578	271.39	-0.2152963	271.39	-0.2293	271.39	-0.176765	271.39	-0.1545595	271.39	-0.175955	271.39	-0.1422126	271.39	-0.1370675	271.39	-0.1966178
271.6	0.9887397	271.6	0.9640957	271.6	1.012248	271.6	0.9815519	271.6	0.9535219	271.6	0.9937998	271.6	1.024093	271.6	-0.2064706	271.59	-0.2160483	271.59	-0.230159	271.59	-0.1751189	271.59	-0.1599944	271.59	-0.1764115	271.59	-0.1470226	271.59	-0.133582	271.59	-0.1990072
271.8	0.9926435	271.8	0.9598809	271.8	1.008912	271.8	0.9770368	271.8	0.9458589	271.8	0.9885042	271.8	1.024689	271.8	-0.1978944	271.8	-0.2123308	271.8	-0.2273527	271.8	-0.1774569	271.8	-0.1533105	271.8	-0.1763777	271.8	-0.1450044	271.8	-0.1316222	271.8	-0.1922263
272	0.9922859	272	0.9644377	272	1.014842	272	0.9805225	272	0.9524397	272	0.9936324	272	1.024374	272	-0.2037284	271.99	-0.2125863	271.99	-0.2234835	271.99	-0.1788713	271.99	-0.1597924	271.99	-0.1735879	271.99	-0.1453055	271.99	-0.134253	271.99	-0.1979694
272.2	0.9948515	272.2	0.9585516	272.2	1.011964	272.2	0.9846836	272.2	0.9501519	272.2	0.9973593	272.2	1.02396	272.2	-0.1988546	272.19	-0.2120533	272.19	-0.2282364	272.19	-0.179438	272.19	-0.1547745	272.19	-0.1731271	272.19	-0.1408066	272.19	-0.1320594	272.19	-0.1964824
272.4	0.9908342	272.4	0.9579506	272.4	1.005938	272.4	0.9826102	272.4	0.9493302	272.4	0.9954487	272.4	1.026133	272.4	-0.203945	272.4	-0.2099258	272.4	-0.2276396	272.4	-0.1765771	272.4	-0.1579601	272.4	-0.1752592	272.4	-0.1457803	272.4	-0.1351423	272.4	-0.1941787
272.6	0.9941926	272.6	0.9584539	272.6	1.010399	272.6	0.984546	272.6	0.9474082	272.6	0.9949466	272.6	1.027064	272.6	-0.2012997	272.6	-0.2095723	272.6	-0.2202832	272.6	-0.1761864	272.6	-0.154471	272.6	-0.173115	272.6	-0.1450512	272.6	-0.1306203	272.6	-0.1961862
272.8	0.9934497	272.8	0.9603227	272.8	1.012289	272.8	0.9821803	272.8	0.9486086	272.8	0.9932772	272.8	1.028861	272.8	-0.205709	272.79	-0.21076	272.79	-0.2210065	272.79	-0.1748484	272.79	-0.158369	272.79	-0.1729083	272.79	-0.1413769	272.79	-0.1325644	272.79	-0.2009355
273	0.9900745	273	0.9630949	273	1.011668	273	0.9828036	273	0.9496573	273	0.9922655	273	1.024977	273	-0.2000658	273	-0.2136071	273	-0.2261225	273	-0.1778108	273	-0.1509555	273	-0.1754332	273	-0.1468245	273	-0.1344931	273	-0.193071
273.2	0.9885809	273.2	0.9652148	273.2	1.010249	273.2	0.9835893	273.2	0.9509248	273.2	0.9997667	273.2	1.026154	273.2	-0.2062007	273.2	-0.2134841	273.2	-0.2260219	273.2	-0.1723765	273.2	-0.1558165	273.2	-0.1759629	273.2	-0.142523	273.2	-0.1317871	273.2	-0.1974405
273.4	0.9937977	273.4	0.966058	273.4	1.010875	273.4	0.9864201	273.4	0.9542747	273.4	0.9913503	273.4	1.025803	273.4	-0.2014689	273.39	-0.2126069	273.39	-0.2286087	273.39	-0.170702	273.39	-0.1541807	273.39	-0.1742541	273.39	-0.146089	273.39	-0.1326392	273.39	-0.1985172
273.6	0.9873809	273.6	0.9572928	273.6	1.014942	273.6	0.9838482	273.6	0.952674	273.6	0.9925284	273.6	1.028117	273.6	-0.2019046	273.59	-0.2067851	273.59	-0.2197527	273.59	-0.1777422	273.59	-0.1560924	273.59	-0.1737314	273.59	-0.1418897	273.59	-0.1390961	273.59	-0.1969067
273.8	0.9929925	273.8	0.9550748	273.8	1.010731	273.8	0.9825116	273.8	0.9560043	273.8	0.9972854	273.8	1.028776	273.8	-0.2012087	273.79	-0.2112761	273.79	-0.2226732	273.79	-0.1746324	273.79	-0.1582767	273.79	-0.1763209	273.79	-0.1426215	273.79	-0.1350111	273.79	-0.1960555
274	0.9885784	274	0.9609802	274	1.009853	274	0.9819753	274	0.9510019	274	0.9958203	274	1.026651	274	-0.1974268	273.99	-0.212712	273.99	-0.2254002	273.99	-0.1772832	273.99	-0.1562395	273.99	-0.1767796	273.99	-0.1479447	273.99	-0.1315499	273.99	-0.1981686
274.2	0.9872172	274.2	0.9559619	274.2	1.011365	274.2	0.9830391	274.2	0.9529169	274.2	0.9955854	274.2	1.031508	274.2	-0.2013318	274.19	-0.2078958	274.19	-0.2249251	274.19	-0.1757281	274.19	-0.1553632	274.19	-0.172626	274.19	-0.1467155	274.19	-0.1360732	274.19	-0.19668
274.4	0.9904054	274.4	0.9592578	274.4	1.013495	274.4	0.9823238	274.4	0.9507465	274.4	0.9930099	274.4	1.025448	274.4	-0.2017728	274.4	-0.2119567	274.4	-0.2232766	274.4	-0.1734615	274.4	-0.1510951	274.4	-0.1703478	274.4	-0.1460533	274.4	-0.1336096	274.4	-0.1962874
274.6	0.9940091	274.6	0.9634745	274.6	1.010138	274.6	0.9849499	274.6	0.9555279	274.6	0.9970202	274.6	1.02837	274.6	-0.2065788	274.59	-0.2066889	274.59	-0.2237926	274.59	-0.177689	274.59	-0.1583101	274.59	-0.1751627	274.59	-0.1452765	274.59	-0.1324081	274.59	-0.1948879
274.8	0.9944598	274.8	0.9570226	274.8	1.011725	274.8	0.9799276	274.8	0.9534377	274.8	0.9979826	274.8	1.026556	274.8	-0.2023992	274.79	-0.2079603	274.79	-0.2282003	274.79	-0.1760942	274.79	-0.1532941	274.79	-0.1750521	274.79	-0.139898	274.79	-0.1326582	274.79	-0.1909311
275	0.990602	275	0.9590107	275	1.013421	275	0.980895	275	0.9508436	275	0.9964455	275	1.029251	275	-0.2033636	274.99	-0.2106452	274.99	-0.2252922	274.99	-0.1763502	274.99	-0.1534547	274.99	-0.171438	274.99	-0.1445849	274.99	-0.1350116	274.99	-0.1943909
275.2	0.9856672	275.2	0.9563915	275.2	1.013749	275.2	0.9844096	275.2	0.9548598	275.2	0.9959829	275.2	1.029264	275.2	-0.2072006	275.19	-0.211441	275.19	-0.2256187	275.19	-0.1743036	275.19	-0.1583364	275.19	-0.175503	275.19	-0.1410281	275.19	-0.129873	275.19	-0.1971051
275.4	0.9905194	275.4	0.9590083	275.4	1.011027	275.4	0.9837543	275.4	0.9550294	275.4	0.9917862	275.4	1.026246	275.4	-0.2035184	275.39	-0.2112671	275.39	-0.2286556	275.39	-0.1759262	275.39	-0.1561278	275.39	-0.1702498	275.39	-0.1423078	275.39	-0.1344752	275.39	-0.195222
275.6	0.9917085	275.6	0.96332	275.6	1.01358	275.6	0.9824597	275.6	0.9510705	275.6	0.9936094	275.6	1.033471	275.6	-0.1983556	275.59	-0.2078735	275.59	-0.2224652	275.59	-0.1757659	275.59	-0.1590635	275.59	-0.1731788	275.59	-0.1431856	275.59	-0.1337324	275.59	-0.1970951
275.8	0.9895688	275.8	0.9588119	275.8	1.013987	275.8	0.9880521	275.8	0.9500995	275.8	0.9981804	275.8	1.026655	275.8	-0.1998026	275.79	-0.2085125	275.79	-0.2236216	275.79	-0.1749574	275.79	-0.1572646	275.79	-0.1732602	275.79	-0.1435685	275.79	-0.1344879	275.79	-0.1958039
276	0.9964114	276	0.9607796	276	1.012391	276	0.9816457	276	0.9528754	276	0.9990758	276	1.035198	276	-0.1996387	275.99	-0.2083889	275.99	-0.2265064	275.99	-0.1757582	275.99	-0.1551689	275.99	-0.1704483	275.99	-0.1410113	275.99	-0.1335052	275.99	-0.1919224
276.2	0.9921876	276.2	0.9616195	276.2	1.014444	276.2	0.9827683	276.2	0.9572859	276.2	0.9950619	276.2	1.030457	276.2	-0.2006449	276.19	-0.2163611	276.19	-0.221843	276.19	-0.1766196	276.19	-0.1518375	276.19	-0.178745	276.19	-0.1429708	276.19	-0.1320965	276.19	-0.1924383
276.4	0.9919082	276.4	0.9595805	276.4	1.014443	276.4	0.9832062	276.4	0.9563637	276.4	0.9984694	276.4	1.030841	276.4	-0.2004979	276.39	-0.206977	276.39	-0.2201915	276.39	-0.1737854	276.39	-0.1554778	276.39	-0.1721697	276.39	-0.1455825	276.39	-0.1334927	276.39	-0.1890416
276.6	0.990351	276.6	0.961565	276.6	1.01109	276.6	0.9823936	276.6	0.9507231	276.6	0.9980779	276.6	1.031768	276.6	-0.203438	276.59	-0.2106985	276.59	-0.2213834	276.59	-0.1732639	276.59	-0.1532053	276.59	-0.1713195	276.59	-0.1399598	276.59	-0.13242	276.59	-0.1953837
276.8	0.9908863	276.8	0.9634596	276.8	1.014045	276.8	0.9848027	276.8	0.9568235	276.8	0.9986646	276.8	1.031426	276.8	-0.2009377	276.79	-0.2051893	276.79	-0.2226697	276.79	-0.1732259	276.79	-0.1538469	276.79	-0.1712227	276.79	-0.1441988	276.79	-0.1300231	276.79	-0.193825
277	0.9917486	277	0.964783	277	1.015825	277	0.9822982	277	0.9534993	277	0.9954793	277	1.024993	277	-0.1981354	276.99	-0.2086514	276.99	-0.2208113	276.99	-0.1781647	276.99	-0.1539151	276.99	-0.1730704	276.99	-0.139424	276.99	-0.1267579	276.99	-0.1982035
277.2	0.9906059	277.2	0.9619261	277.2	1.022102	277.2	0.9822811	277.2	0.9527798	277.2	1.000305	277.2	1.029597	277.2	-0.1965587	277.2	-0.2072667	277.2	-0.2206204	277.2	-0.1704473	277.2	-0.1513009	277.2	-0.1743832	277.2	-0.1424081	277.2	-0.1322526	277.2	-0.1979319
277.4	0.993772	277.4	0.9661278	277.4	1.014562	277.4	0.9862294	277.4	0.9542318	277.4	0.9965372	277.4	1.031298	277.4	-0.2029756	277.39	-0.2092547	277.39	-0.2239879	277.39	-0.1747957	277.39	-0.1535556	277.39	-0.1714333	277.39	-0.1409991	277.39	-0.1341491	277.39	-0.1956191
277.6	0.9897628	277.6	0.9648016	277.6	1.016862	277.6	0.984153	277.6	0.9553652	277.6	0.9970809	277.6	1.028181	277.6	-0.2001287	277.59	-0.2069273	277.59	-0.2210982	277.59	-0.1720514	277.59	-0.1517969	277.59	-0.1704235	277.59	-0.1388798	277.59	-0.1282037	277.59	-0.1924173
277.8	0.9883762	277.8	0.9625282	277.8	1.01088	277.8	0.9822488	277.8	0.9554003	277.8	1.000127	277.8	1.029368	277.8	-0.1949147	277.8	-0.2102361	277.8	-0.2242045	277.8	-0.1753831	277.8	-0.1558362	277.8	-0.1731223	277.8	-0.1419036	277.8	-0.1279904	277.8	-0.1950536
278	0.9896417	278	0.9658005	278	1.013847	278	0.9867703	278	0.9531549	278	0.9956546	278	1.031165	278	-0.2022767	278	-0.2111496	278	-0.2257685	278	-0.1752834	278	-0.1563693	278	-0.1695028	278	-0.1381612	278	-0.1354341	278	-0.192537
278.2	0.9941791	278.2	0.9624404	278.2	1.012305	278.2	0.983827	278.2	0.9557233	278.2	1.003696	278.2	1.029667	278.2	-0.2002122	278.2	-0.2060505	278.2	-0.2214804	278.2	-0.1771301	278.2	-0.154376	278.2	-0.1718755	278.2	-0.1427214	278.2	-0.127877	278.2	-0.192719
278.4	0.9949458	278.4	0.963218	278.4	1.01705	278.4	0.9863378	278.4	0.9544038	278.4	0.9995469	278.4	1.026389	278.4	-0.2004384	278.4	-0.2034381	278.4	-0.2238912	278.4	-0.1738208	278.4	-0.1525885	278.4	-0.169687	278.4	-0.1427003	278.4	-0.1288241	278.4	-0.1952966
278.6	0.9924306	278.6	0.962872	278.6	1.018546	278.6	0.983478	278.6	0.9582758	278.6	0.9979208	278.6	1.034616	278.6	-0.1984193	278.59	-0.2129602	278.59	-0.2203491	278.59	-0.1777425	278.59	-0.149844	278.59	-0.1684688	278.59	-0.138826	278.59	-0.1314209	278.59	-0.1988698
278.8	0.9921547	278.8	0.9640145	278.8	1.016604	278.8	0.9840115	278.8	0.9538898	278.8	0.9980699	278.8	1.027955	278.8	-0.1944928	278.79	-0.2052146	278.79	-0.2200963	278.79	-0.1757187	278.79	-0.1514394	278.79	-0.1634301	278.79	-0.1441526	278.79	-0.1300227	278.79	-0.1917222
279	0.9962593	279	0.9639758	279	1.013645	279	0.9864995	279	0.9533266	279	0.9935501	279	1.030856	279	-0.19793	278.99	-0.2102738	278.99	-0.219375	278.99	-0.1671508	278.99	-0.1512753	278.99	-0.1680222	278.99	-0.1418783	278.99	-0.1290651	278.99	-0.1960389
279.2	0.9915783	279.2	0.9603996	279.2	1.01964	279.2	0.9860183	279.2	0.9549993	279.2	1.000733	279.2	1.028702	279.2	-0.2013991	279.2	-0.2079456	279.2	-0.2221185	279.2	-0.1733151	279.2	-0.1531073	279.2	-0.1729802	279.2	-0.1416963	279.2	-0.1255913	279.2	-0.1914214
279.4	0.9928215	279.4	0.9619569	279.4	1.016659	279.4	0.9923882	279.4	0.9551427	279.4	0.9950948	279.4	1.031776	279.4	-0.2025571	279.4	-0.2075923	279.4	-0.2203844	279.4	-0.1731507	279.4	-0.1525418	279.4	-0.1706131	279.4	-0.1394001	279.4	-0.1256881	279.4	-0.1940114
279.6	0.9915079	279.6	0.9668993	279.6	1.015618	279.6	0.9860163	279.6	0.9526851	279.6	0.9967186	279.6	1.032305	279.6	-0.198587	279.6	-0.2092994	279.6	-0.2224742	279.6	-0.1693505	279.6	-0.1528984	279.6	-0.1685119	279.6	-0.1442093	279.6	-0.1275571	279.6	-0.1864091
279.8	0.9947208	279.8	0.9682865	279.8	1.016563	279.8	0.9846625	279.8	0.955883	279.8	1.000321	279.8	1.027488	279.8	-0.1992766	279.79	-0.2045331	279.79	-0.2195547	279.79	-0.1751818	279.79	-0.1524389	279.79	-0.1694432	279.79	-0.1414173	279.79	-0.1306268	279.79	-0.1969246
280	0.9924598	280	0.9655693	280	1.017906	280	0.9880491	280	0.9561034	280	0.9985718	280	1.034181	280	-0.2049243	280	-0.2062109	280	-0.2224385	280	-0.1728399	280	-0.1491455	280	-0.1712902	280	-0.1403116	280	-0.1324379	280	-0.1911074
280.2	0.9962908	280.2	0.9637205	280.2	1.01399	280.2	0.9876672	280.2	0.9542606	280.2	0.9967753	280.2	1.027994	280.2	-0.1960587	280.2	-0.2036113	280.2	-0.2201087	280.2	-0.1731451	280.2	-0.1536085	280.2	-0.1703354	280.2	-0.143449	280.2	-0.1241198	280.2	-0.1905873
280.4	0.9914798	280.4	0.9627205	280.4	1.018336	280.4	0.9867401	280.4	0.9559035	280.4	0.9978673	280.4	1.035864	280.4	-0.1932172	280.4	-0.2043805	280.4	-0.2220959	280.4	-0.1735475	280.4	-0.1527939	280.4	-0.1755015	280.4	-0.1404637	280.4	-0.1255566	280.4	-0.1937618
280.6	0.9944278	280.6	0.9616781	280.6	1.015891	280.6	0.9835861	280.6	0.9595569	280.6	0.9981696	280.6	1.032786	280.6	-0.1981489	280.6	-0.2114829	280.6	-0.2197528	280.6	-0.1740669	280.6	-0.149215	280.6	-0.1723912	280.6	-0.140437	280.6	-0.1310228	280.6	-0.1940905
280.8	0.9947701	280.8	0.9639257	280.8	1.017087	280.8	0.9856396	280.8	0.9577073	280.8	0.9988649	280.8	1.034444	280.8	-0.201129	280.8	-0.2114795	280.8	-0.2226516	280.8	-0.169156	280.8	-0.1524094	280.8	-0.1691648	280.8	-0.1382943	280.8	-0.1276107	280.8	-0.1910601
281	0.9915782	281	0.9639141	281	1.012548	281	0.9811817	281	0.9626144	281	0.9989761	281	1.029426	281	-0.2002258	281	-0.2053904	281	-0.22056	281	-0.1684289	281	-0.1533262	281	-0.17138	281	-0.1381711	281	-0.1309368	281	-0.1925314
281.2	0.9951616	281.2	0.9660649	281.2	1.015303	281.2	0.988857	281.2	0.9560072	281.2	0.9980876	281.2	1.033261	281.2	-0.2022499	281.19	-0.2023496	281.19	-0.217212	281.19	-0.173324	281.19	-0.1480365	281.19	-0.1666387	281.19	-0.1414994	281.19	-0.1327646	281.19	-0.1904135
281.4	0.9922643	281.4	0.9634964	281.4	1.016624	281.4	0.9883261	281.4	0.9544843	281.4	0.9984774	281.4	1.03242	281.4	-0.201278	281.4	-0.2062711	281.4	-0.2209266	281.4	-0.1742	281.4	-0.1460215	281.4	-0.1666049	281.4	-0.1383589	281.4	-0.1280169	281.4	-0.1898408
281.6	0.9947507	281.6	0.962202	281.6	1.018917	281.6	0.986285	281.6	0.9618984	281.6	1.001783	281.6	1.03297	281.6	-0.2005967	281.59	-0.2102616	281.59	-0.2249161	281.59	-0.1702883	281.59	-0.1499523	281.59	-0.1713533	281.59	-0.1353499	281.59	-0.127347	281.59	-0.1908431
281.8	0.9949999	281.8	0.9643686	281.8	1.015902	281.8	0.9835597	281.8	0.9556503	281.8	0.9979469	281.8	1.032071	281.8	-0.2025442	281.8	-0.2027411	281.8	-0.2175451	281.8	-0.1727868	281.8	-0.1498395	281.8	-0.1706348	281.8	-0.1362452	281.8	-0.1277654	281.8	-0.1946839
282	0.992985	282	0.9619393	282	1.019429	282	0.9868464	282	0.9592988	282	1.001236	282	1.026316	282	-0.1955718	281.99	-0.2057992	281.99	-0.2180711	281.99	-0.1684422	281.99	-0.1507302	281.99	-0.1676892	281.99	-0.1383776	281.99	-0.1307549	281.99	-0.1880913
282.2	0.9912206	282.2	0.9607208	282.2	1.016698	282.2	0.9879078	282.2	0.95864	282.2	0.9987574	282.2	1.034607	282.2	-0.1960068	282.2	-0.2049127	282.2	-0.2211482	282.2	-0.1732516	282.2	-0.1491319	282.2	-0.1664242	282.2	-0.1395779	282.2	-0.1282253	282.2	-0.1897565
282.4	0.9896188	282.4	0.9656087	282.4	1.014607	282.4	0.9858741	282.4	0.954821	282.4	0.9999482	282.4	1.035089	282.4	-0.1924573	282.4	-0.2087541	282.4	-0.2209271	282.4	-0.1693889	282.4	-0.1505233	282.4	-0.1680185	282.4	-0.1426449	282.4	-0.1272426	282.4	-0.1936752
282.6	0.9946296	282.6	0.9608434	282.6	1.019594	282.6	0.9899181	282.6	0.9565488	282.6	0.9993606	282.6	1.031734	282.6	-0.2002433	282.6	-0.2046137	282.6	-0.2199105	282.6	-0.1740266	282.6	-0.1485237	282.6	-0.1679176	282.6	-0.1398818	282.6	-0.1246134	282.6	-0.1911141
282.8	0.9978086	282.8	0.9669446	282.8	1.015198	282.8	0.9845662	282.8	0.9534299	282.8	0.9997289	282.8	1.032246	282.8	-0.1981652	282.8	-0.2043108	282.8	-0.2198856	282.8	-0.1718715	282.8	-0.1473235	282.8	-0.1668672	282.8	-0.1383999	282.8	-0.1276899	282.8	-0.1970751
283	0.9949719	283	0.968392	283	1.018373	283	0.9858335	283	0.9613529	283	1.000138	283	1.030048	283	-0.1949157	283	-0.2008737	283	-0.2163833	283	-0.1715051	283	-0.1501903	283	-0.1697907	283	-0.1363943	283	-0.1266075	283	-0.1882599
283.2	0.9941007	283.2	0.9622396	283.2	1.0144	283.2	0.9871258	283.2	0.95521	283.2	0.9948487	283.2	1.033776	283.2	-0.1978565	283.2	-0.2047573	283.2	-0.2159917	283.2	-0.1714565	283.2	-0.1518728	283.2	-0.1646949	283.2	-0.1401439	283.2	-0.1259701	283.2	-0.1960909
283.4	0.9892676	283.4	0.9645444	283.4	1.020624	283.4	0.9884721	283.4	0.9537332	283.4	1.000721	283.4	1.03302	283.4	-0.1963944	283.4	-0.2053246	283.4	-0.2181022	283.4	-0.167624	283.4	-0.1491767	283.4	-0.167066	283.4	-0.1370896	283.4	-0.1277771	283.4	-0.1943035
283.6	0.9953532	283.6	0.9648035	283.6	1.020447	283.6	0.9891459	283.6	0.9604266	283.6	1.005705	283.6	1.035272	283.6	-0.1962587	283.6	-0.2025087	283.6	-0.2147676	283.6	-0.1726423	283.6	-0.1501365	283.6	-0.1702859	283.6	-0.1405105	283.6	-0.1275512	283.6	-0.1895799
283.8	0.9944558	283.8	0.9703828	283.8	1.017842	283.8	0.9863751	283.8	0.9613172	283.8	1.000336	283.8	1.035243	283.8	-0.1967449	283.8	-0.203416	283.8	-0.2211226	283.8	-0.1667788	283.8	-0.1508477	283.8	-0.1657038	283.8	-0.1414255	283.8	-0.1245691	283.8	-0.1910165
284	0.9965727	284	0.9640148	284	1.015754	284	0.9891737	284	0.9590525	284	1.0009	284	1.034043	284	-0.1997239	284	-0.2075291	284	-0.2180652	284	-0.1687983	284	-0.1498049	284	-0.1643898	284	-0.1356484	284	-0.1289328	284	-0.190423
284.2	0.994529	284.2	0.9664719	284.2	1.021925	284.2	0.9885562	284.2	0.956778	284.2	0.9983147	284.2	1.03295	284.2	-0.1972157	284.21	-0.2061353	284.21	-0.2209228	284.21	-0.1731548	284.21	-0.1473135	284.21	-0.1627776	284.21	-0.1378395	284.21	-0.1237176	284.21	-0.1896646
284.4	0.9952981	284.4	0.9599699	284.4	1.016493	284.4	0.9891345	284.4	0.9556361	284.4	1.002183	284.4	1.038254	284.4	-0.1910813	284.4	-0.203141	284.4	-0.2173	284.4	-0.1696109	284.4	-0.1477709	284.4	-0.1659329	284.4	-0.1392477	284.4	-0.1306707	284.4	-0.1945958
284.6	0.9949431	284.6	0.9666071	284.6	1.021796	284.6	0.9876034	284.6	0.959888	284.6	1.003675	284.6	1.03691	284.6	-0.1975959	284.6	-0.205605	284.6	-0.2161532	284.6	-0.1685526	284.6	-0.146972	284.6	-0.1689328	284.6	-0.1404119	284.6	-0.1255032	284.6	-0.1927935
284.8	0.9948772	284.8	0.9655256	284.8	1.023279	284.8	0.9879111	284.8	0.9622099	284.8	1.002973	284.8	1.040009	284.8	-0.1963267	284.8	-0.2023832	284.8	-0.2152385	284.8	-0.1674004	284.8	-0.145178	284.8	-0.1701412	284.8	-0.136898	284.8	-0.1238718	284.8	-0.1902701
285	0.9928408	285	0.9709275	285	1.020645	285	0.9881756	285	0.9572539	285	1.001249	285	1.032619	285	-0.1970084	285	-0.2049687	285	-0.2122151	285	-0.1717756	285	-0.1491	285	-0.1662736	285	-0.137749	285	-0.119972	285	-0.1879534
285.2	0.9919451	285.2	0.9616395	285.2	1.019164	285.2	0.9857985	285.2	0.9582536	285.2	1.001299	285.2	1.035861	285.2	-0.1944663	285.2	-0.2069636	285.2	-0.2186349	285.2	-0.1712348	285.2	-0.1496752	285.2	-0.1699123	285.2	-0.1419363	285.2	-0.1266184	285.2	-0.189526
285.4	0.9948584	285.4	0.9672354	285.4	1.013273	285.4	0.9848037	285.4	0.9554418	285.4	0.998676	285.4	1.033112	285.4	-0.1935207	285.4	-0.204228	285.4	-0.2193619	285.4	-0.1680858	285.4	-0.1515476	285.4	-0.1666723	285.4	-0.1335038	285.4	-0.1247238	285.4	-0.190512
285.6	0.9969695	285.6	0.9672726	285.6	1.020781	285.6	0.9885927	285.6	0.958295	285.6	1.004105	285.6	1.037114	285.6	-0.195421	285.6	-0.2038308	285.6	-0.2156187	285.6	-0.1669975	285.6	-0.1475464	285.6	-0.1669207	285.6	-0.1372805	285.6	-0.1236347	285.6	-0.1884931
285.8	0.9911797	285.8	0.9652904	285.8	1.018608	285.8	0.9892602	285.8	0.960902	285.8	1.00191	285.8	1.033557	285.8	-0.1935145	285.8	-0.2059647	285.8	-0.2200317	285.8	-0.1668508	285.8	-0.1465801	285.8	-0.1657133	285.8	-0.1381382	285.8	-0.1261148	285.8	-0.1910018
286	0.9937456	286	0.9657148	286	1.020658	286	0.9906117	286	0.9573801	286	0.9963216	286	1.039281	286	-0.1966875	286	-0.2050792	286	-0.2148423	286	-0.1692866	286	-0.1418656	286	-0.1658498	286	-0.1360135	286	-0.1246863	286	-0.1893491
286.2	0.9955587	286.2	0.9719653	286.2	1.018014	286.2	0.9858258	286.2	0.9593943	286.2	1.003404	286.2	1.036545	286.2	-0.1938884	286.2	-0.2053175	286.2	-0.2158044	286.2	-0.1687136	286.2	-0.149721	286.2	-0.166454	286.2	-0.1365943	286.2	-0.1230254	286.2	-0.1898341
286.4	0.9913025	286.4	0.9631919	286.4	1.020627	286.4	0.9872882	286.4	0.9549247	286.4	1.007231	286.4	1.032747	286.4	-0.1967299	286.4	-0.2059038	286.4	-0.2168441	286.4	-0.1658732	286.4	-0.1477552	286.4	-0.1683657	286.4	-0.1338886	286.4	-0.1272808	286.4	-0.1881346
286.6	0.9969386	286.6	0.9674348	286.6	1.020222	286.6	0.9867981	286.6	0.960541	286.6	0.9994655	286.6	1.038469	286.6	-0.1942473	286.6	-0.2012226	286.6	-0.2164933	286.6	-0.1665879	286.6	-0.1496172	286.6	-0.1673916	286.6	-0.1382104	286.6	-0.1261851	286.6	-0.1916648
286.8	1.002828	286.8	0.9648418	286.8	1.017398	286.8	0.9895752	286.8	0.9633294	286.8	1.004443	286.8	1.035813	286.8	-0.1932112	286.8	-0.2009463	286.8	-0.2192698	286.8	-0.1665224	286.8	-0.1459747	286.8	-0.1664151	286.8	-0.1363049	286.8	-0.1260399	286.8	-0.1914431
287	0.9997433	287	0.9677785	287	1.020134	287	0.9860452	287	0.9611827	287	1.001924	287	1.035469	287	-0.1965469	287	-0.206917	287	-0.2130524	287	-0.1694006	287	-0.1460181	287	-0.1635516	287	-0.1333333	287	-0.1268627	287	-0.189116
287.2	0.9971122	287.2	0.9690436	287.2	1.022588	287.2	0.9879666	287.2	0.9595837	287.2	1.003195	287.2	1.038234	287.2	-0.1962571	287.2	-0.2040178	287.2	-0.2165922	287.2	-0.1678976	287.2	-0.1437183	287.2	-0.1667846	287.2	-0.13716	287.2	-0.1259276	287.2	-0.1927424
287.4	0.997654	287.4	0.9677969	287.4	1.019062	287.4	0.9831704	287.4	0.965337	287.4	1.00055	287.4	1.036219	287.4	-0.1944066	287.4	-0.2040106	287.4	-0.2177577	287.4	-0.1727314	287.4	-0.1450238	287.4	-0.1614302	287.4	-0.1340646	287.4	-0.1285411	287.4	-0.1914023
287.6	0.9999732	287.6	0.9667442	287.6	1.020191	287.6	0.9928697	287.6	0.9596068	287.6	1.004545	287.6	1.033804	287.6	-0.1935386	287.6	-0.205158	287.6	-0.2140798	287.6	-0.1649462	287.6	-0.1496596	287.6	-0.1627878	287.6	-0.1349695	287.6	-0.1197271	287.6	-0.1874175
287.8	0.992672	287.8	0.9642882	287.8	1.021128	287.8	0.9849468	287.8	0.9630126	287.8	0.9995772	287.8	1.038503	287.8	-0.1938012	287.8	-0.2059776	287.8	-0.2160664	287.8	-0.1664789	287.8	-0.1428037	287.8	-0.1676101	287.8	-0.1360883	287.8	-0.1205269	287.8	-0.1899033
288	0.9972422	288	0.9682242	288	1.024152	288	0.9875557	288	0.9614382	288	1.004865	288	1.037967	288	-0.1917978	287.99	-0.2033109	287.99	-0.217979	287.99	-0.1670579	287.99	-0.1490385	287.99	-0.162101	287.99	-0.1333648	287.99	-0.1216848	287.99	-0.1914317
288.2	0.9928034	288.2	0.9710518	288.2	1.018318	288.2	0.9935836	288.2	0.958635	288.2	1.004144	288.2	1.038732	288.2	-0.1992493	288.19	-0.2010536	288.19	-0.2172156	288.19	-0.1685012	288.19	-0.1475578	288.19	-0.1655342	288.19	-0.1334394	288.19	-0.1296244	288.19	-0.1898265
288.4	1.00331	288.4	0.9638148	288.4	1.022254	288.4	0.9929072	288.4	0.9629064	288.4	1.001277	288.4	1.032265	288.4	-0.1935839	288.4	-0.1986438	288.4	-0.2128195	288.4	-0.1640444	288.4	-0.147335	288.4	-0.1609788	288.4	-0.1344414	288.4	-0.1201219	288.4	-0.1869874
288.6	0.9990243	288.6	0.9733148	288.6	1.017369	288.6	0.9960853	288.6	0.9652921	288.6	1.004559	288.6	1.036499	288.6	-0.1946872	288.6	-0.2000366	288.6	-0.2116372	288.6	-0.163355	288.6	-0.1420179	288.6	-0.1684335	288.6	-0.136536	288.6	-0.1233699	288.6	-0.1903628
288.8	0.9950572	288.8	0.9634019	288.8	1.020353	288.8	0.9869843	288.8	0.9620735	288.8	1.008788	288.8	1.03567	288.8	-0.1929564	288.8	-0.2038883	288.8	-0.2182113	288.8	-0.1617873	288.8	-0.1472614	288.8	-0.1605658	288.8	-0.1327989	288.8	-0.1214219	288.8	-0.188797
289	0.9978294	289	0.9670784	289	1.020352	289	0.9894509	289	0.9612297	289	1.004232	289	1.037785	289	-0.1987449	289	-0.203827	289	-0.2153936	289	-0.1686104	289	-0.1443305	289	-0.1603543	289	-0.1346708	289	-0.1232425	289	-0.187836
289.2	1.000545	289.2	0.9677284	289.2	1.018474	289.2	0.98912	289.2	0.9601266	289.2	0.9998216	289.2	1.03402	289.2	-0.1934207	289.2	-0.1996929	289.2	-0.2141589	289.2	-0.1676024	289.2	-0.14682	289.2	-0.1633173	289.2	-0.1365446	289.2	-0.1227192	289.2	-0.1885742
289.4	0.9964387	289.4	0.9710879	289.4	1.023411	289.4	0.9947465	289.4	0.9580127	289.4	1.001065	289.4	1.039591	289.4	-0.1912553	289.42	-0.204161	289.42	-0.2168246	289.42	-0.1670688	289.42	-0.1461726	289.42	-0.1618335	289.42	-0.1289004	289.42	-0.1220854	289.42	-0.1902201
289.6	0.9997185	289.6	0.9672245	289.6	1.0226	289.6	0.9892814	289.6	0.9593108	289.6	1.004671	289.6	1.036435	289.6	-0.1900244	289.59	-0.2002482	289.59	-0.2165118	289.59	-0.1644138	289.59	-0.1470454	289.59	-0.1608293	289.59	-0.1362601	289.59	-0.1254279	289.59	-0.1888982
289.8	1.001258	289.8	0.969757	289.8	1.019529	289.8	0.9903855	289.8	0.9598548	289.8	1.000368	289.8	1.03978	289.8	-0.1931224	289.8	-0.2031078	289.8	-0.2173198	289.8	-0.1652766	289.8	-0.1481627	289.8	-0.164028	289.8	-0.1327799	289.8	-0.1272153	289.8	-0.188291
290	0.9929066	290	0.9616767	290	1.012414	290	0.9866881	290	0.9569635	290	0.999675	290	1.036222	290	-0.1906698	290	-0.2064574	290	-0.2172932	290	-0.1717997	290	-0.1469429	290	-0.1683023	290	-0.1331265	290	-0.1239943	290	-0.1861825
290.2	0.9897352	290.2	0.9630503	290.2	1.019879	290.2	0.9877163	290.2	0.9554076	290.2	1.001407	290.2	1.038225	290.2	-0.1902486	290.2	-0.2105291	290.2	-0.219164	290.2	-0.1738547	290.2	-0.1477323	290.2	-0.1666045	290.2	-0.1353278	290.2	-0.1177198	290.2	-0.1843922
290.4	0.9947478	290.4	0.9608431	290.4	1.016974	290.4	0.9832722	290.4	0.9553429	290.4	1.004437	290.4	1.039131	290.4	-0.1882695	290.39	-0.2128521	290.39	-0.2232401	290.39	-0.1722302	290.39	-0.1483997	290.39	-0.1686415	290.39	-0.1379808	290.39	-0.1201574	290.39	-0.1866421
290.6	0.9903865	290.6	0.9658275	290.6	1.013215	290.6	0.9888005	290.6	0.958754	290.6	0.9994541	290.6	1.038543	290.6	-0.1882009	290.59	-0.2074491	290.59	-0.2179191	290.59	-0.1716704	290.59	-0.1441896	290.59	-0.1711932	290.59	-0.1321669	290.59	-0.1192555	290.59	-0.1824406
290.8	0.9939935	290.8	0.9628611	290.8	1.015561	290.8	0.9861754	290.8	0.9580722	290.8	0.996949	290.8	1.037516	290.8	-0.1833698	290.8	-0.2100071	290.8	-0.2184414	290.8	-0.1758404	290.8	-0.1481769	290.8	-0.162298	290.8	-0.1356756	290.8	-0.119095	290.8	-0.1802853
291	0.9931215	291	0.9652692	291	1.013813	291	0.9909222	291	0.9559055	291	1.00313	291	1.04563	291	-0.191208	291	-0.2112601	291	-0.2159562	291	-0.1724682	291	-0.1452259	291	-0.1645617	291	-0.1347444	291	-0.1211171	291	-0.1791186
291.2	0.9932431	291.2	0.9615187	291.2	1.018255	291.2	0.9919546	291.2	0.9578729	291.2	1.001565	291.2	1.035656	291.2	-0.1890457	291.19	-0.2080775	291.19	-0.2222181	291.19	-0.1679876	291.19	-0.1472394	291.19	-0.1656763	291.19	-0.1405953	291.19	-0.1207645	291.19	-0.1809507
291.4	0.9955424	291.4	0.9610766	291.4	1.020116	291.4	0.9935514	291.4	0.9562568	291.4	1.003025	291.4	1.043864	291.4	-0.1905624	291.4	-0.2091971	291.4	-0.2223034	291.4	-0.1664939	291.4	-0.1481296	291.4	-0.1641819	291.4	-0.1305993	291.4	-0.1111295	291.4	-0.1769362
291.6	0.9919472	291.6	0.9672009	291.6	1.020131	291.6	0.9862139	291.6	0.9573553	291.6	1.003181	291.6	1.040921	291.6	-0.1862894	291.59	-0.2083622	291.59	-0.2187023	291.59	-0.170155	291.59	-0.1472137	291.59	-0.1641703	291.59	-0.1356289	291.59	-0.1228644	291.59	-0.1814727
291.8	0.9978338	291.8	0.9636926	291.8	1.019249	291.8	0.9902341	291.8	0.9552577	291.8	1.002518	291.8	1.038208	291.8	-0.1888134	291.79	-0.2086319	291.79	-0.2199233	291.79	-0.1680866	291.79	-0.1438461	291.79	-0.1641557	291.79	-0.1385859	291.79	-0.1193194	291.79	-0.1789675
292	0.995477	292	0.9648558	292	1.015621	292	0.9861224	292	0.95725	292	1.001958	292	1.033031	292	-0.1828636	291.99	-0.2073946	291.99	-0.2165411	291.99	-0.1659999	291.99	-0.1448736	291.99	-0.1619193	291.99	-0.1365258	291.99	-0.1201861	291.99	-0.1804823
292.2	1.001082	292.2	0.9623433	292.2	1.020332	292.2	0.9908076	292.2	0.9595292	292.2	1.00156	292.2	1.038722	292.2	-0.1823375	292.19	-0.2066815	292.19	-0.2190761	292.19	-0.1683429	292.19	-0.145548	292.19	-0.1644448	292.19	-0.1349538	292.19	-0.1191434	292.19	-0.1782736
292.4	0.9960603	292.4	0.9673432	292.4	1.017964	292.4	0.9911562	292.4	0.9556835	292.4	1.000389	292.4	1.038709	292.4	-0.1883035	292.39	-0.2127845	292.39	-0.2173637	292.39	-0.1719463	292.39	-0.1454183	292.39	-0.1677555	292.39	-0.1356873	292.39	-0.117958	292.39	-0.175223
292.6	0.9966253	292.6	0.9693956	292.6	1.021677	292.6	0.9918591	292.6	0.9563298	292.6	0.9983668	292.6	1.037775	292.6	-0.1819065	292.6	-0.2117488	292.6	-0.2142816	292.6	-0.1709133	292.6	-0.1395511	292.6	-0.1662486	292.6	-0.1349494	292.6	-0.1204312	292.6	-0.1780758
292.8	0.9960144	292.8	0.9677346	292.8	1.018419	292.8	0.9934022	292.8	0.9575912	292.8	1.003212	292.8	1.040534	292.8	-0.1835727	292.8	-0.2040932	292.8	-0.2168584	292.8	-0.172133	292.8	-0.1462822	292.8	-0.164943	292.8	-0.1312071	292.8	-0.1194702	292.8	-0.1797939
293	0.9989507	293	0.9693306	293	1.019236	293	0.987652	293	0.9613025	293	1.006328	293	1.038797	293	-0.1845004	293	-0.2064265	293	-0.2163789	293	-0.1692592	293	-0.139854	293	-0.1598016	293	-0.1353389	293	-0.1202287	293	-0.1823164
293.2	0.999334	293.2	0.9672028	293.2	1.016926	293.2	0.9956613	293.2	0.9607344	293.2	1.00397	293.2	1.046386	293.2	-0.1830833	293.2	-0.206683	293.2	-0.2154174	293.2	-0.1701076	293.2	-0.1444484	293.2	-0.1629787	293.2	-0.1360137	293.2	-0.1122578	293.2	-0.178994
293.4	1.005859	293.4	0.9690168	293.4	1.019896	293.4	0.9914569	293.4	0.958784	293.4	1.002026	293.4	1.043859	293.4	-0.1821956	293.4	-0.2078183	293.4	-0.2168684	293.4	-0.1687256	293.4	-0.1437862	293.4	-0.1644107	293.4	-0.1307653	293.4	-0.1118311	293.4	-0.1814335
293.6	1.006442	293.6	0.9681956	293.6	1.018938	293.6	0.9953372	293.6	0.9527771	293.6	0.9976851	293.6	1.041833	293.6	-0.1871533	293.59	-0.2056509	293.59	-0.2132754	293.59	-0.162915	293.59	-0.1444099	293.59	-0.1615842	293.59	-0.134978	293.59	-0.1173577	293.59	-0.176633
293.8	1.00222	293.8	0.971749	293.8	1.017546	293.8	0.9927866	293.8	0.9602815	293.8	1.001282	293.8	1.043813	293.8	-0.1841107	293.79	-0.2091299	293.79	-0.2160286	293.79	-0.1655325	293.79	-0.144067	293.79	-0.167652	293.79	-0.1343021	293.79	-0.1175872	293.79	-0.1766402
294	1.004983	294	0.9721129	294	1.019978	294	0.9926679	294	0.9631847	294	1.008875	294	1.039959	294	-0.1817022	294	-0.2076928	294	-0.2161192	294	-0.1671756	294	-0.1421347	294	-0.1664348	294	-0.131151	294	-0.116126	294	-0.177787
294.2	0.9989869	294.2	0.9720038	294.2	1.014216	294.2	0.9936337	294.2	0.9608096	294.2	1.00846	294.2	1.03378	294.2	-0.1834377	294.19	-0.2049552	294.19	-0.219143	294.19	-0.1674855	294.19	-0.1481462	294.19	-0.1681025	294.19	-0.1342552	294.19	-0.1143412	294.19	-0.1706992
294.4	1.005348	294.4	0.9704908	294.4	1.015133	294.4	0.9931604	294.4	0.9581558	294.4	1.004285	294.4	1.041447	294.4	-0.1828855	294.39	-0.2083372	294.39	-0.2158334	294.39	-0.1653139	294.39	-0.1434762	294.39	-0.1643516	294.39	-0.1320543	294.39	-0.1169958	294.39	-0.1787267
294.6	1.005509	294.6	0.9723537	294.6	1.020526	294.6	0.991679	294.6	0.958892	294.6	1.005031	294.6	1.038245	294.6	-0.187489	294.6	-0.204119	294.6	-0.2161546	294.6	-0.1726772	294.6	-0.1429729	294.6	-0.1648257	294.6	-0.1345011	294.6	-0.1162423	294.6	-0.1758069
294.8	1.005305	294.8	0.9723182	294.8	1.021112	294.8	0.9936731	294.8	0.958221	294.8	1.00165	294.8	1.043619	294.8	-0.1818675	294.8	-0.2033949	294.8	-0.2167313	294.8	-0.1692662	294.8	-0.1426315	294.8	-0.16323	294.8	-0.1269009	294.8	-0.1210267	294.8	-0.1766875
295	1.008745	295	0.972354	295	1.021765	295	0.9975584	295	0.9602921	295	1.009871	295	1.044853	295	-0.1826939	294.99	-0.2042999	294.99	-0.2152964	294.99	-0.1670863	294.99	-0.1462732	294.99	-0.1609529	294.99	-0.1314177	294.99	-0.1172157	294.99	-0.1779223
295.2	1.005984	295.2	0.9757518	295.2	1.024182	295.2	0.9947946	295.2	0.9594045	295.2	1.002823	295.2	1.041964	295.2	-0.180942	295.2	-0.2038642	295.2	-0.2143443	295.2	-0.1691726	295.2	-0.1435341	295.2	-0.1657872	295.2	-0.1326747	295.2	-0.1152198	295.2	-0.1758014
295.4	1.006652	295.4	0.9695938	295.4	1.023621	295.4	0.993207	295.4	0.9547237	295.4	1.005484	295.4	1.041277	295.4	-0.1854868	295.39	-0.2075401	295.39	-0.2164553	295.39	-0.1668055	295.39	-0.1441829	295.39	-0.1552832	295.39	-0.1298656	295.39	-0.1159221	295.39	-0.1790495
295.6	1.010109	295.6	0.971516	295.6	1.023819	295.6	0.9945175	295.6	0.9619711	295.6	1.008923	295.6	1.044483	295.6	-0.1811851	295.6	-0.2050848	295.6	-0.2118243	295.6	-0.169273	295.6	-0.1424251	295.6	-0.1656393	295.6	-0.1313422	295.6	-0.1146031	295.6	-0.1746045
295.8	1.01071	295.8	0.9731759	295.8	1.024532	295.8	0.9946799	295.8	0.9622571	295.8	1.008521	295.8	1.043843	295.8	-0.1853435	295.8	-0.2057795	295.8	-0.216988	295.8	-0.1644513	295.8	-0.1457622	295.8	-0.1583734	295.8	-0.1321607	295.8	-0.1123648	295.8	-0.1757127
296	1.011882	296	0.9717114	296	1.021363	296	0.9939495	296	0.9605042	296	1.004622	296	1.045353	296	-0.1806653	296	-0.2023464	296	-0.2170067	296	-0.1658983	296	-0.1399001	296	-0.1588177	296	-0.1303831	296	-0.1145477	296	-0.1748688
296.2	1.009863	296.2	0.9676909	296.2	1.021269	296.2	0.9948177	296.2	0.9618201	296.2	1.002555	296.2	1.043299	296.2	-0.1842717	296.19	-0.2069954	296.19	-0.2136001	296.19	-0.1619499	296.19	-0.1420466	296.19	-0.1618389	296.19	-0.1320424	296.19	-0.1132286	296.19	-0.1745994
296.4	1.012954	296.4	0.9765467	296.4	1.020205	296.4	0.9976091	296.4	0.9585613	296.4	1.002489	296.4	1.042021	296.4	-0.1838257	296.4	-0.1968257	296.4	-0.2158333	296.4	-0.164371	296.4	-0.1435456	296.4	-0.1653325	296.4	-0.1332433	296.4	-0.1147393	296.4	-0.1728875
296.6	1.010956	296.6	0.9762582	296.6	1.025245	296.6	0.9977003	296.6	0.9595606	296.6	1.003435	296.6	1.044056	296.6	-0.185096	296.6	-0.203348	296.6	-0.213369	296.6	-0.1678628	296.6	-0.1419917	296.6	-0.163392	296.6	-0.1289803	296.6	-0.1182091	296.6	-0.1750263
296.8	1.014594	296.8	0.9792856	296.8	1.023348	296.8	0.9948745	296.8	0.9604155	296.8	1.005054	296.8	1.046744	296.8	-0.1851	296.79	-0.2011257	296.79	-0.214754	296.79	-0.1660816	296.79	-0.1362282	296.79	-0.1612195	296.79	-0.1267917	296.79	-0.1205036	296.79	-0.1696136
297	1.015345	297	0.9741567	297	1.024824	297	0.9998481	297	0.9621077	297	1.00225	297	1.045514	297	-0.1797616	297	-0.2059923	297	-0.211721	297	-0.1637	297	-0.1430902	297	-0.1614018	297	-0.1330019	297	-0.1139967	297	-0.1772978
297.2	1.012071	297.2	0.9779521	297.2	1.023752	297.2	0.9967033	297.2	0.9622465	297.2	1.004373	297.2	1.046217	297.2	-0.1799183	297.2	-0.2063372	297.2	-0.2155582	297.2	-0.1664114	297.2	-0.1415783	297.2	-0.1620466	297.2	-0.1343002	297.2	-0.1143326	297.2	-0.1793038
297.4	1.011857	297.4	0.9769126	297.4	1.024465	297.4	0.9892288	297.4	0.9608625	297.4	1.007538	297.4	1.040313	297.4	-0.1809544	297.39	-0.2010342	297.39	-0.2168292	297.39	-0.1660736	297.39	-0.1407797	297.39	-0.1631655	297.39	-0.1280475	297.39	-0.1181315	297.39	-0.1757404
297.6	1.016316	297.6	0.9749883	297.6	1.022064	297.6	0.9944708	297.6	0.9605119	297.6	1.008135	297.6	1.042795	297.6	-0.1811969	297.59	-0.2035312	297.59	-0.2137444	297.59	-0.164929	297.59	-0.1388371	297.59	-0.1592843	297.59	-0.1310754	297.59	-0.1124406	297.59	-0.173669
297.8	1.013288	297.8	0.9758377	297.8	1.024478	297.8	0.9976488	297.8	0.9627275	297.8	1.005844	297.8	1.040048	297.8	-0.1816117	297.79	-0.1993294	297.79	-0.2157077	297.79	-0.1649995	297.79	-0.1423863	297.79	-0.1616834	297.79	-0.1317004	297.79	-0.1117096	297.79	-0.174519
298	1.01348	298	0.9733061	298	1.019936	298	0.994689	298	0.9612883	298	1.002989	298	1.044943	298	-0.1828005	297.99	-0.2070919	297.99	-0.2141813	297.99	-0.1679242	297.99	-0.1424299	297.99	-0.1573583	297.99	-0.1314228	297.99	-0.1112883	297.99	-0.176608
298.2	1.013314	298.2	0.9784734	298.2	1.028571	298.2	0.9959873	298.2	0.9616821	298.2	1.007987	298.2	1.040471	298.2	-0.1835463	298.19	-0.2025252	298.19	-0.2119275	298.19	-0.1657161	298.19	-0.1382451	298.19	-0.1574666	298.19	-0.1294159	298.19	-0.1142527	298.19	-0.1691211
298.4	1.017279	298.4	0.9759029	298.4	1.020789	298.4	0.9954817	298.4	0.9614259	298.4	1.004525	298.4	1.04173	298.4	-0.1789487	298.4	-0.2016457	298.4	-0.2130522	298.4	-0.160792	298.4	-0.1442635	298.4	-0.1589339	298.4	-0.1321204	298.4	-0.1149599	298.4	-0.1771138
298.6	1.021053	298.6	0.9781519	298.6	1.02688	298.6	0.9940907	298.6	0.9633616	298.6	1.003896	298.6	1.044361	298.6	-0.1839487	298.59	-0.2045454	298.59	-0.2132885	298.59	-0.1606948	298.59	-0.141887	298.59	-0.163494	298.59	-0.1272829	298.59	-0.1172332	298.59	-0.1748189
298.8	1.017992	298.8	0.9784312	298.8	1.024358	298.8	0.9976112	298.8	0.9642435	298.8	1.009695	298.8	1.044126	298.8	-0.1825093	298.79	-0.1986674	298.79	-0.210356	298.79	-0.1639609	298.79	-0.1383345	298.79	-0.1619204	298.79	-0.1286574	298.79	-0.1150772	298.79	-0.173003
299	1.016212	299	0.9734682	299	1.024717	299	0.9957295	299	0.9600819	299	1.003791	299	1.045806	299	-0.1771718	299	-0.2055716	299	-0.211748	299	-0.1641387	299	-0.1411608	299	-0.1627466	299	-0.1317706	299	-0.1109729	299	-0.1682722
299.2	1.013203	299.2	0.977817	299.2	1.021456	299.2	0.9993864	299.2	0.959067	299.2	1.008189	299.2	1.042481	299.2	-0.1798258	299.19	-0.2003058	299.19	-0.2123624	299.19	-0.1653346	299.19	-0.1430481	299.19	-0.1628731	299.19	-0.131363	299.19	-0.1126684	299.19	-0.171402
299.4	1.018964	299.4	0.9807932	299.4	1.024068	299.4	0.9959815	299.4	0.9625711	299.4	1.002325	299.4	1.048336	299.4	-0.1769759	299.39	-0.2048855	299.39	-0.2131321	299.39	-0.1613047	299.39	-0.1419858	299.39	-0.1623557	299.39	-0.1325341	299.39	-0.1126515	299.39	-0.1731319
299.6	1.021471	299.6	0.9821019	299.6	1.024457	299.6	0.9950333	299.6	0.9616979	299.6	1.009688	299.6	1.045903	299.6	-0.1796835	299.59	-0.2032034	299.59	-0.207247	299.59	-0.1657384	299.59	-0.1418438	299.59	-0.1614361	299.59	-0.1342138	299.59	-0.1164296	299.59	-0.1706671
299.8	1.015379	299.8	0.979856	299.8	1.025618	299.8	1.000222	299.8	0.9657952	299.8	1.006224	299.8	1.047779	299.8	-0.1805293	299.79	-0.200072	299.79	-0.2114803	299.79	-0.1601998	299.79	-0.1378456	299.79	-0.1588045	299.79	-0.1276612	299.79	-0.1127909	299.79	-0.1717922
300	1.017156	300	0.9784991	300	1.028035	300	0.9974821	300	0.9632447	300	1.007356	300	1.046458	300	-0.1776882	300	-0.1996029	300	-0.2095757	300	-0.16191	300	-0.140179	300	-0.1641762	300	-0.1266097	300	-0.1160887	300	-0.1676837
300.2	1.020921	300.2	0.9810869	300.2	1.028799	300.2	0.9985021	300.2	0.961362	300.2	1.004979	300.2	1.049993	300.2	-0.1796294	300.19	-0.1973344	300.19	-0.2088631	300.19	-0.1634963	300.19	-0.1399985	300.19	-0.1630063	300.19	-0.1285014	300.19	-0.1154085	300.19	-0.1746211
300.4	1.019588	300.4	0.9793431	300.4	1.026999	300.4	1.001711	300.4	0.9641628	300.4	1.008937	300.4	1.045788	300.4	-0.1788012	300.4	-0.200914	300.4	-0.2087843	300.4	-0.1630105	300.4	-0.1428717	300.4	-0.1593786	300.4	-0.1303913	300.4	-0.1137733	300.4	-0.1692727
300.6	1.020682	300.6	0.9837666	300.6	1.029423	300.6	0.9990969	300.6	0.9642155	300.6	1.006874	300.6	1.046942	300.6	-0.1798096	300.59	-0.1976548	300.59	-0.2129498	300.59	-0.1651612	300.59	-0.1422629	300.59	-0.1617727	300.59	-0.1294138	300.59	-0.1174555	300.59	-0.1739627
300.8	1.019156	300.8	0.9766374	300.8	1.027359	300.8	0.9989322	300.8	0.9633125	300.8	1.000605	300.8	1.045213	300.8	-0.1825307	300.79	-0.199192	300.79	-0.2119173	300.79	-0.1627134	300.79	-0.1388991	300.79	-0.1620051	300.79	-0.1263083	300.79	-0.1111809	300.79	-0.1688249
301	1.025038	301	0.979432	301	1.030453	301	0.9976911	301	0.9671189	301	1.009681	301	1.041478	301	-0.1806237	300.99	-0.200486	300.99	-0.2128008	300.99	-0.1589745	300.99	-0.1401815	300.99	-0.1639961	300.99	-0.1241252	300.99	-0.108261	300.99	-0.1710362
301.2	1.023594	301.2	0.9816943	301.2	1.026419	301.2	0.9972257	301.2	0.9630997	301.2	1.005939	301.2	1.048459	301.2	-0.1791714	301.19	-0.2006466	301.19	-0.2137226	301.19	-0.1629667	301.19	-0.1380825	301.19	-0.1630749	301.19	-0.1303709	301.19	-0.1165938	301.19	-0.1681878
301.4	1.027191	301.4	0.9815174	301.4	1.03012	301.4	1.003322	301.4	0.9616836	301.4	1.008926	301.4	1.046419	301.4	-0.1807692	301.4	-0.1985265	301.4	-0.2132304	301.4	-0.1626282	301.4	-0.1436345	301.4	-0.1639578	301.4	-0.1287573	301.4	-0.1124938	301.4	-0.169196
301.6	1.023353	301.6	0.98327	301.6	1.029242	301.6	0.9988753	301.6	0.963396	301.6	1.009577	301.6	1.045759	301.6	-0.1791287	301.6	-0.1983804	301.6	-0.210217	301.6	-0.162901	301.6	-0.1369599	301.6	-0.1593383	301.6	-0.1279498	301.6	-0.1082788	301.6	-0.1709951
301.8	1.021087	301.8	0.9827406	301.8	1.030447	301.8	1.004925	301.8	0.9627389	301.8	1.010284	301.8	1.044128	301.8	-0.1788453	301.8	-0.200919	301.8	-0.2107	301.8	-0.1625301	301.8	-0.138454	301.8	-0.1590861	301.8	-0.1327315	301.8	-0.1056904	301.8	-0.1710169
302.01	1.028609	302.01	0.9820262	302.01	1.031175	302.01	1.000289	302.01	0.9637193	302.01	1.007232	302.01	1.049075	302.01	-0.1846323	302	-0.1990942	302	-0.2105813	302	-0.1662546	302	-0.1407205	302	-0.1587059	302	-0.1279811	302	-0.1116782	302	-0.1699038
302.2	1.027559	302.2	0.9841939	302.2	1.028659	302.2	0.999079	302.2	0.964685	302.2	1.011047	302.2	1.044303	302.2	-0.1787195	302.19	-0.1973379	302.19	-0.2083585	302.19	-0.1638867	302.19	-0.1358969	302.19	-0.1570154	302.19	-0.1271262	302.19	-0.1122104	302.19	-0.169988
302.4	1.026058	302.4	0.9833985	302.4	1.031742	302.4	1.002647	302.4	0.966638	302.4	1.009033	302.4	1.048357	302.4	-0.1797308	302.39	-0.1991275	302.39	-0.2076594	302.39	-0.1629926	302.39	-0.1401007	302.39	-0.1603401	302.39	-0.126284	302.39	-0.1159433	302.39	-0.1676214
302.6	1.023856	302.6	0.9882218	302.6	1.030795	302.6	1.000165	302.6	0.9652326	302.6	1.007219	302.6	1.044634	302.6	-0.1752724	302.59	-0.1999865	302.59	-0.2131333	302.59	-0.1630285	302.59	-0.1362859	302.59	-0.1594177	302.59	-0.1259384	302.59	-0.1114693	302.59	-0.171106
302.8	1.024818	302.8	0.9826018	302.8	1.031157	302.8	1.000742	302.8	0.9664875	302.8	1.011104	302.8	1.045031	302.8	-0.1827684	302.79	-0.1994208	302.79	-0.2109319	302.79	-0.1585559	302.79	-0.1371919	302.79	-0.1565816	302.79	-0.1285958	302.79	-0.1117228	302.79	-0.1698003
303	1.023743	303	0.9813677	303	1.030092	303	1.00062	303	0.9657214	303	1.008555	303	1.0423	303	-0.1827482	302.99	-0.1984381	302.99	-0.2125311	302.99	-0.1587724	302.99	-0.1368229	302.99	-0.1559457	302.99	-0.129606	302.99	-0.11066	302.99	-0.1727292
303.2	1.032187	303.2	0.9860749	303.2	1.027952	303.2	1.001381	303.2	0.9621009	303.2	1.006208	303.2	1.043277	303.2	-0.1818227	303.19	-0.1983297	303.19	-0.2146558	303.19	-0.1580236	303.19	-0.1369931	303.19	-0.159588	303.19	-0.1258954	303.19	-0.1121639	303.19	-0.1714072
303.4	1.024747	303.4	0.9791614	303.4	1.030203	303.4	0.9968913	303.4	0.9627251	303.4	1.008918	303.4	1.047685	303.4	-0.1784621	303.4	-0.1961285	303.4	-0.2081674	303.4	-0.162091	303.4	-0.1359716	303.4	-0.1558767	303.4	-0.1294131	303.4	-0.1111877	303.4	-0.1679682
303.6	1.023305	303.6	0.9813498	303.6	1.031535	303.6	0.9967111	303.6	0.9671881	303.6	1.010288	303.6	1.050039	303.6	-0.1776761	303.6	-0.1938722	303.6	-0.204946	303.6	-0.1616266	303.6	-0.1363487	303.6	-0.1583455	303.6	-0.1285042	303.6	-0.1088438	303.6	-0.1677972
303.8	1.028636	303.8	0.9855725	303.8	1.029591	303.8	1.000165	303.8	0.9614741	303.8	1.01174	303.8	1.046182	303.8	-0.1757413	303.79	-0.1966258	303.79	-0.2125499	303.79	-0.1632304	303.79	-0.1379991	303.79	-0.1630097	303.79	-0.1252098	303.79	-0.1070153	303.79	-0.1674863
304	1.029421	304	0.9848238	304	1.029915	304	1.004715	304	0.9642943	304	1.009917	304	1.047786	304	-0.1749965	303.99	-0.1974731	303.99	-0.2087932	303.99	-0.1613385	303.99	-0.1396152	303.99	-0.1587576	303.99	-0.1271823	303.99	-0.1126432	303.99	-0.1642247
304.2	1.032729	304.2	0.9881276	304.2	1.030186	304.2	1.001827	304.2	0.9638501	304.2	1.010041	304.2	1.046782	304.2	-0.1816415	304.19	-0.1966182	304.19	-0.2088466	304.19	-0.1619779	304.19	-0.1365714	304.19	-0.1586039	304.19	-0.1240799	304.19	-0.1094227	304.19	-0.1687487
304.4	1.032534	304.4	0.9877372	304.4	1.031064	304.4	1.000535	304.4	0.9676948	304.4	1.009528	304.4	1.053716	304.4	-0.1750987	304.39	-0.1978483	304.39	-0.2139062	304.39	-0.1611609	304.39	-0.1351151	304.39	-0.1611475	304.39	-0.1273065	304.39	-0.1099151	304.39	-0.1678132
304.6	1.03246	304.6	0.9900815	304.6	1.031315	304.6	1.007734	304.6	0.9655557	304.6	1.006187	304.6	1.043452	304.6	-0.1738774	304.6	-0.1979037	304.6	-0.2097574	304.6	-0.1652684	304.6	-0.1381454	304.6	-0.1601131	304.6	-0.1263221	304.6	-0.1058852	304.6	-0.1674766
304.8	1.02837	304.8	0.9800277	304.8	1.032661	304.8	1.001477	304.8	0.9686082	304.8	1.009801	304.8	1.048203	304.8	-0.1782537	304.8	-0.1919707	304.8	-0.2084632	304.8	-0.1591217	304.8	-0.1374163	304.8	-0.1585845	304.8	-0.1290494	304.8	-0.1119866	304.8	-0.1680492
305	1.026989	305	0.9882009	305	1.028762	305	1.005154	305	0.966404	305	1.0094	305	1.048628	305	-0.1757621	304.99	-0.1965035	304.99	-0.2113077	304.99	-0.1599928	304.99	-0.1343441	304.99	-0.1577304	304.99	-0.1231133	304.99	-0.1095866	304.99	-0.1728303
305.2	1.030585	305.2	0.9871925	305.2	1.03131	305.2	1.006985	305.2	0.9631268	305.2	1.010333	305.2	1.049686	305.2	-0.1837261	305.19	-0.1960848	305.19	-0.2090664	305.19	-0.1607833	305.19	-0.1376601	305.19	-0.1593726	305.19	-0.1301783	305.19	-0.1100508	305.19	-0.16957
305.4	1.031711	305.4	0.9893813	305.4	1.029512	305.4	1.000561	305.4	0.9661901	305.4	1.012583	305.4	1.049452	305.4	-0.1766245	305.4	-0.1972331	305.4	-0.2111953	305.4	-0.159871	305.4	-0.1397433	305.4	-0.1572473	305.4	-0.124862	305.4	-0.1090955	305.4	-0.1670294
305.6	1.03467	305.6	0.9922763	305.6	1.028863	305.6	1.000417	305.6	0.9640274	305.6	1.008014	305.6	1.051263	305.6	-0.1811448	305.59	-0.1951179	305.59	-0.2083299	305.59	-0.1607078	305.59	-0.1368598	305.59	-0.158383	305.59	-0.1271675	305.59	-0.1069948	305.59	-0.1641138
305.8	1.031138	305.8	0.9883052	305.8	1.029848	305.8	1.001429	305.8	0.9686289	305.8	1.016601	305.8	1.049208	305.8	-0.1816328	305.8	-0.1932126	305.8	-0.2070879	305.8	-0.1578633	305.8	-0.1358648	305.8	-0.1599437	305.8	-0.1227646	305.8	-0.1123176	305.8	-0.1678931
306	1.032746	306	0.9893006	306	1.033163	306	1.005692	306	0.9656276	306	1.007806	306	1.046935	306	-0.1798938	305.99	-0.1970522	305.99	-0.2101782	305.99	-0.1620444	305.99	-0.138764	305.99	-0.1560275	305.99	-0.1239005	305.99	-0.107484	305.99	-0.1691604
306.2	1.030295	306.2	0.9846293	306.2	1.037103	306.2	1.001359	306.2	0.9670625	306.2	1.011303	306.2	1.045817	306.2	-0.1758209	306.19	-0.1975289	306.19	-0.2088352	306.19	-0.1616495	306.19	-0.141264	306.19	-0.1541395	306.19	-0.125879	306.19	-0.1075859	306.19	-0.1678129
306.4	1.030924	306.4	0.9917354	306.4	1.027719	306.4	1.001904	306.4	0.9700624	306.4	1.013261	306.4	1.051776	306.4	-0.1719225	306.39	-0.1994399	306.39	-0.2111939	306.39	-0.1600762	306.39	-0.1350954	306.39	-0.1618927	306.39	-0.1245209	306.39	-0.1044047	306.39	-0.1692864
306.6	1.029981	306.6	0.9923176	306.6	1.03425	306.6	1.002997	306.6	0.9688437	306.6	1.016288	306.6	1.046691	306.6	-0.1739695	306.6	-0.195603	306.6	-0.2045004	306.6	-0.1549887	306.6	-0.1355674	306.6	-0.1554351	306.6	-0.1219753	306.6	-0.1141781	306.6	-0.1698277
306.8	1.035433	306.8	0.9875523	306.8	1.032847	306.8	1.008724	306.8	0.968549	306.8	1.008527	306.8	1.051221	306.8	-0.1783725	306.8	-0.193945	306.8	-0.2062726	306.8	-0.1599725	306.8	-0.1350361	306.8	-0.1588964	306.8	-0.12436	306.8	-0.1046227	306.8	-0.170258
307	1.033769	307	0.987681	307	1.035115	307	1.006803	307	0.9711393	307	1.00974	307	1.049512	307	-0.1780053	306.99	-0.1944211	306.99	-0.2098915	306.99	-0.1613579	306.99	-0.1345672	306.99	-0.1544631	306.99	-0.1251713	306.99	-0.1098566	306.99	-0.1701513
307.2	1.033345	307.2	0.9917748	307.2	1.03807	307.2	1.003623	307.2	0.9694267	307.2	1.014088	307.2	1.051226	307.2	-0.180502	307.19	-0.1970597	307.19	-0.2072746	307.19	-0.1590542	307.19	-0.133447	307.19	-0.1575813	307.19	-0.1219415	307.19	-0.1076553	307.19	-0.1657164
307.4	1.03836	307.4	0.9912491	307.4	1.03462	307.4	1.003946	307.4	0.9679413	307.4	1.009671	307.4	1.048014	307.4	-0.1756859	307.39	-0.2001114	307.39	-0.2083865	307.39	-0.1609364	307.39	-0.1325672	307.39	-0.1566843	307.39	-0.1240807	307.39	-0.1106487	307.39	-0.1622808
307.6	1.033662	307.6	0.990859	307.6	1.033534	307.6	1.006027	307.6	0.9698268	307.6	1.014038	307.6	1.044762	307.6	-0.1755433	307.59	-0.1986138	307.59	-0.2049314	307.59	-0.1606411	307.59	-0.1354442	307.59	-0.1606666	307.59	-0.1237642	307.59	-0.1110293	307.59	-0.1704842
307.8	1.038888	307.8	0.9905154	307.8	1.034587	307.8	1.003221	307.8	0.9703805	307.8	1.013155	307.8	1.048901	307.8	-0.1785365	307.79	-0.1931235	307.79	-0.2089298	307.79	-0.1573372	307.79	-0.1373394	307.79	-0.1549228	307.79	-0.1218354	307.79	-0.1074497	307.79	-0.1669567
308	1.038362	308	0.9911225	308	1.028483	308	1.002122	308	0.971595	308	1.014313	308	1.044897	308	-0.1740524	307.99	-0.1992303	307.99	-0.2096226	307.99	-0.1590083	307.99	-0.1320939	307.99	-0.1524124	307.99	-0.1215548	307.99	-0.1081615	307.99	-0.1665926
308.2	1.039219	308.2	0.9889743	308.2	1.037213	308.2	1.004862	308.2	0.9670457	308.2	1.010717	308.2	1.050688	308.2	-0.1765319	308.19	-0.1924761	308.19	-0.2069482	308.19	-0.1615454	308.19	-0.1349086	308.19	-0.1556496	308.19	-0.1229637	308.19	-0.1070907	308.19	-0.1698442
308.4	1.039618	308.4	0.9880133	308.4	1.035348	308.4	1.006718	308.4	0.9686154	308.4	1.016227	308.4	1.049404	308.4	-0.1761336	308.4	-0.1945634	308.4	-0.2084173	308.4	-0.1588067	308.4	-0.137611	308.4	-0.1565287	308.4	-0.1272712	308.4	-0.1031763	308.4	-0.1673918
308.6	1.032477	308.6	0.9897223	308.6	1.036606	308.6	1.006817	308.6	0.9693608	308.6	1.009769	308.6	1.045148	308.6	-0.1743358	308.59	-0.1973966	308.59	-0.207864	308.59	-0.1577406	308.59	-0.1341963	308.59	-0.151802	308.59	-0.1267063	308.59	-0.1069387	308.59	-0.1663225
308.8	1.038782	308.8	0.9962045	308.8	1.037749	308.8	1.009751	308.8	0.9716779	308.8	1.017006	308.8	1.048952	308.8	-0.1769804	308.79	-0.1930691	308.79	-0.2043367	308.79	-0.1573484	308.79	-0.1340574	308.79	-0.1580032	308.79	-0.123657	308.79	-0.1090239	308.79	-0.1707517
309	1.035544	309	0.9919138	309	1.034986	309	1.007349	309	0.9685237	309	1.015986	309	1.050967	309	-0.1756429	309	-0.1940525	309	-0.2069581	309	-0.1623577	309	-0.1362356	309	-0.1591821	309	-0.1218117	309	-0.1081433	309	-0.1655703
309.2	1.035868	309.2	0.9937955	309.2	1.033535	309.2	1.005146	309.2	0.9733954	309.2	1.016771	309.2	1.052776	309.2	-0.1762117	309.19	-0.1953246	309.19	-0.2086698	309.19	-0.1583202	309.19	-0.1308411	309.19	-0.1594703	309.19	-0.1202588	309.19	-0.1125439	309.19	-0.1636855
309.4	1.038337	309.4	0.9956891	309.4	1.036683	309.4	1.010745	309.4	0.9638561	309.4	1.01569	309.4	1.046714	309.4	-0.1760018	309.39	-0.1942752	309.39	-0.208058	309.39	-0.1618807	309.39	-0.1373372	309.39	-0.156552	309.39	-0.1229245	309.39	-0.1086846	309.39	-0.1658041
309.6	1.042693	309.6	0.9975629	309.6	1.035689	309.6	1.009641	309.6	0.9698265	309.6	1.012873	309.6	1.047994	309.6	-0.1769398	309.59	-0.1930223	309.59	-0.207532	309.59	-0.1617671	309.59	-0.1370676	309.59	-0.1536663	309.59	-0.1204977	309.59	-0.1088477	309.59	-0.1626194
309.8	1.042027	309.8	0.9951733	309.8	1.034683	309.8	1.002951	309.8	0.9700651	309.8	1.016494	309.8	1.048237	309.8	-0.1769402	309.79	-0.1972514	309.79	-0.203961	309.79	-0.1610115	309.79	-0.13602	309.79	-0.1535954	309.79	-0.1265622	309.79	-0.113653	309.79	-0.165319
310	1.038057	310	0.9937448	310	1.033308	310	1.004075	310	0.9695559	310	1.010671	310	1.048984	310	-0.1772235	309.99	-0.1923201	309.99	-0.2084232	309.99	-0.161186	309.99	-0.1388271	309.99	-0.1532735	309.99	-0.1206696	309.99	-0.1093909	309.99	-0.1710051
310.2	1.041553	310.2	0.9944869	310.2	1.034061	310.2	1.008012	310.2	0.9698814	310.2	1.017913	310.2	1.051037	310.2	-0.1776843	310.19	-0.1930807	310.19	-0.2072422	310.19	-0.156267	310.19	-0.1352283	310.19	-0.1534744	310.19	-0.1243372	310.19	-0.1071322	310.19	-0.1645715
[truncated: 16,598 more rows]
