# Supplementary material for: Functional development of a V3/glycan-specific broadly neutralizing antibody isolated from a case of HIV superinfection
Source: eLife journal article supplement (doi:10.7554/elife.68110), 2021-07-15
Supplement: fig2-data2 [file RawData0.xls]

A7		B7		C7		D7		E7		F7		G7		H7		A8		B8		C8		D8		E8		F8		G8		H8
0	0	0	0	0	0	0	0	0	0	0	0	0	0	0	0	0	0	0	0	0	0	0	0	0	0	0	0	0	0	0	0
0.2	0.00270011	0.2	-0.00543473	0.2	-0.0003049	0.2	-0.00249504	0.2	-0.00146234	0.2	0.00027702	0.2	0.00059383	0.2	-0.0061473	0.2	0.0089406	0.2	0.00432453	0.2	0.00066097	0.2	-0.00625616	0.2	-0.00316014	0.2	0.00371393	0.2	-0.0012121	0.2	0.00364163
0.4	-0.00423339	0.4	-0.00175069	0.4	-0.00010192	0.4	-0.00521519	0.4	-0.00153391	0.4	0.00109883	0.4	0.00100282	0.4	-0.00319735	0.4	0.00117014	0.4	-0.00056995	0.4	-0.00593192	0.4	-0.00155446	0.4	0.00213764	0.4	0.00003613	0.4	-0.00055919	0.4	0.00685724
0.6	0.00069688	0.6	-0.00323793	0.6	0.00148471	0.6	0.00043446	0.6	0.00167005	0.6	0.00663806	0.6	0.00043902	0.6	-0.00655475	0.6	0.00778858	0.6	0.00350974	0.6	-0.00586838	0.6	-0.00175374	0.6	-0.0001298	0.6	0.00441657	0.6	0.00262551	0.6	0.00203802
0.8	-0.00346872	0.8	-0.00285857	0.8	0.00070054	0.8	0.0012393	0.8	-0.00121407	0.8	0.00278974	0.8	0.00038282	0.8	-0.00124984	0.8	0.00882892	0.8	0.00550382	0.8	-0.00046509	0.8	-0.00036346	0.8	-0.00295168	0.8	0.0037383	0.8	0.00636191	0.8	0.00755453
1	0.00324186	1	-0.00115864	1	0.00075508	1	0.00413519	1	0.00158887	1	0.00681944	1	-0.00058951	1	-0.00272155	1	0.00768365	1	0.00234111	1	-0.00328759	1	0.00310077	1	-0.00171166	1	0.0026413	1	0.00393696	1	0.00115113
1.2	0.00115772	1.2	0.00459315	1.2	0.00257968	1.2	0.00031993	1.2	0.00525004	1.2	0.00858877	1.2	0.00287215	1.2	0.00319092	1.2	0.00778445	1.2	0.00366065	1.2	-0.00026431	1.2	0.00346716	1.2	0.0039841	1.2	0.00259657	1.2	0.00523928	1.2	0.0014246
1.4	0.00550474	1.4	0.0005449	1.4	0.00162385	1.4	0.00338774	1.4	0.00330744	1.4	0.01001951	1.4	0.00179336	1.4	-0.00204418	1.4	0.01023739	1.4	0.00321411	1.4	-0.0037813	1.4	0.00052543	1.4	-0.0021681	1.4	0.00566971	1.4	0.00704419	1.4	0.00680363
1.6	-0.00063914	1.6	-0.00198365	1.6	0.00561413	1.6	0.00961558	1.6	0.00476757	1.6	0.00362394	1.6	0.00719339	1.6	-0.00087669	1.6	0.00845911	1.6	0.00723883	1.6	-0.00109654	1.6	0.00259542	1.6	0.00073864	1.6	0.0021767	1.6	0.0091047	1.6	0.00349869
1.8	-0.00087489	1.8	0.00013836	1.8	0.0063318	1.8	0.00375876	1.8	0.00379799	1.8	0.00596466	1.8	0.00073992	1.8	0.00325738	1.8	0.01392468	1.8	0.00450933	1.8	-0.00051029	1.8	0.0020874	1.8	0.00448497	1.8	0.00078685	1.8	0.00734338	1.8	0.00692593
2	0.00215791	2	0.00154106	2	0.00403118	2	-0.00283608	2	0.00365647	2	0.00419053	2	0.00792883	2	0.00085104	2	0.00909212	2	0.0045386	2	0.00323222	2	0.0036627	2	0.00364827	2	0.00546583	2	0.00366622	2	0.00484366
2.2	0.0012595	2.2	0.00082659	2.2	0.00527706	2.2	0.0076368	2.2	0.00389789	2.2	0.00605605	2.2	0.00529701	2.2	-0.00216919	2.2	0.00974264	2.2	0.00784218	2.2	-0.00014776	2.2	0.00587372	2.2	0.00220821	2.2	0.00604982	2.2	0.0088005	2.2	0.00884438
2.4	0.00052349	2.4	0.0005091	2.4	0.00451718	2.4	0.00617783	2.4	0.00617837	2.4	0.00580809	2.4	0.00502751	2.4	0.00317021	2.4	0.01602175	2.4	0.00915351	2.4	0.00556734	2.4	0.00333044	2.4	0.00584379	2.4	0.00468968	2.4	0.01376017	2.4	0.00906243
2.6	0.00329386	2.6	0.00195864	2.6	0.00349537	2.6	0.00808885	2.6	0.00532536	2.6	0.00177211	2.6	0.00392065	2.6	0.00279312	2.6	0.01104864	2.6	0.00827963	2.6	0.00589341	2.6	0.00315614	2.6	0.0069489	2.6	0.00550809	2.6	0.00693465	2.6	0.01093678
2.8	0.00196237	2.8	0.00566525	2.8	0.00606514	2.8	0.00750276	2.8	0.00283317	2.8	0.00463923	2.8	0.00751561	2.8	0.00407822	2.8	0.01199104	2.8	0.01286132	2.8	0.0071815	2.8	0.00546454	2.8	0.00649482	2.8	0.00336118	2.8	0.00868281	2.8	0.00606722
3	0.0035076	3	0.00026395	3	0.00955852	3	0.00291355	3	0.00626444	3	0.00718986	3	0.00541863	3	0.00098523	3	0.01062443	3	0.00783005	3	0.00485641	3	0.00210191	3	0.00617487	3	0.00970251	3	0.01023623	3	0.00453683
3.2	0.00490407	3.2	0.00494559	3.2	0.00905274	3.2	0.00708694	3.2	0.00650369	3.2	0.01138418	3.2	0.00424015	3.2	-0.00076743	3.2	0.01040558	3.2	0.00735916	3.2	0.00231701	3.2	0.00427448	3.2	0.00704059	3.2	0.00661105	3.2	0.009183	3.2	0.00528807
3.4	0.00330953	3.4	0.00078928	3.4	0.00685181	3.4	0.00771401	3.4	0.00260159	3.4	0.00665714	3.4	0.00507644	3.4	0.00062292	3.4	0.016205	3.4	0.00567989	3.4	0.0067815	3.4	0.00585603	3.4	0.00367679	3.4	0.00774065	3.4	0.0085865	3.4	0.01253881
3.62	0.00688506	3.62	0.00382738	3.62	0.00770629	3.62	0.00808794	3.62	0.00789551	3.62	0.00607567	3.62	0.00949471	3.62	0.00515571	3.6	0.01311836	3.6	0.00990303	3.6	-0.00016371	3.6	0.00552541	3.6	0.00883604	3.6	0.00576299	3.6	0.009813	3.6	0.01236365
3.8	0.00208142	3.8	0.00446511	3.8	0.00133104	3.8	0.00589672	3.8	0.00550684	3.8	0.01228836	3.8	0.00742667	3.8	0.00180009	3.8	0.00913967	3.8	0.00915657	3.8	0.00486106	3.8	0.00513838	3.8	0.00339693	3.8	0.00895449	3.8	0.0103605	3.8	0.00982064
4	0.00409069	4	0.00180231	4	0.0059521	4	0.00722586	4	0.00787266	4	0.00825216	4	0.00600887	4	0.00248391	4	0.01156924	4	0.01005997	4	0.00924792	4	0.00511071	4	0.0018308	4	0.00559535	4	0.01269464	4	0.01177077
4.2	0.0011417	4.2	0.00354301	4.2	0.00604823	4.2	0.00882734	4.2	0.00409838	4.2	0.01528809	4.2	0.01323224	4.2	0.00408492	4.2	0.01012439	4.2	0.01106052	4.2	0.00350193	4.2	0.00675288	4.2	0.00480219	4.2	0.00755297	4.2	0.00805609	4.2	0.00685014
4.4	0.00244562	4.4	0.00132598	4.4	0.00956105	4.4	0.01006453	4.4	0.00102481	4.4	0.00375075	4.4	0.0080492	4.4	0.0001863	4.4	0.01860376	4.4	0.01034509	4.4	0.00882554	4.4	0.0073122	4.4	0.00633226	4.4	0.00899538	4.4	0.01143008	4.4	0.00809223
4.6	0.00914224	4.6	0.00805514	4.6	0.00718216	4.6	0.00465064	4.6	0.01038094	4.6	0.0105929	4.6	0.01509929	4.6	0.0076208	4.6	0.0183691	4.6	0.00694316	4.6	0.00431805	4.6	0.00783221	4.6	0.00286498	4.6	0.00542051	4.6	0.01041323	4.6	0.01161996
4.8	0.00542661	4.8	0.00196671	4.8	0.00388206	4.8	0.01056416	4.8	0.00314431	4.8	0.00839185	4.8	0.00736107	4.8	0.0017847	4.8	0.01058201	4.8	0.01134522	4.8	0.0046772	4.8	0.00681745	4.8	0.0098847	4.8	0.01098445	4.8	0.0105083	4.8	0.01267074
5	0.00581987	5	0.00109637	5	0.00895689	5	0.00544225	5	0.00452035	5	0.00926712	5	0.00887647	5	0.00942291	5	0.01521122	5	0.0059261	5	0.00370091	5	0.00652263	5	0.0044604	5	0.00888969	5	0.01318904	5	0.00974266
5.2	0.00631664	5.2	0.00715196	5.2	0.00823292	5.2	0.00778046	5.2	0.00844635	5.2	0.01511686	5.2	0.01056714	5.2	0.00283602	5.2	0.01326306	5.2	0.00958267	5.2	0.0046545	5.2	0.01038075	5.2	0.01039343	5.2	0.00985517	5.2	0.01179782	5.2	0.01077181
5.4	0.00652823	5.4	0.00412567	5.4	0.01171246	5.4	0.00447826	5.4	0.00330815	5.4	0.01068327	5.4	0.00781168	5.4	0.00507309	5.4	0.01492545	5.4	0.01225643	5.4	0.00781304	5.4	0.01086018	5.4	0.00907722	5.4	0.01068454	5.4	0.01168799	5.4	0.00880264
5.6	0.00743025	5.6	0.00137423	5.6	0.00991513	5.6	0.01235689	5.6	0.00346282	5.6	0.01429568	5.6	0.00702765	5.6	0.00846533	5.6	0.0149046	5.6	0.01002439	5.6	0.00977442	5.6	0.00790226	5.6	0.00579599	5.6	0.01028627	5.6	0.01125708	5.6	0.0125595
5.8	0.01005596	5.8	0.0044549	5.8	0.0095108	5.8	0.00776207	5.8	0.00883458	5.8	0.00672152	5.8	0.01134261	5.8	0.01023559	5.8	0.01496551	5.8	0.01174872	5.8	0.00707057	5.8	0.0114347	5.8	0.00638536	5.8	0.01156851	5.8	0.01149289	5.8	0.00807896
6	0.00416534	6	0.00173122	6	0.00781836	6	0.00678981	6	0.00550617	6	0.0076047	6	0.0074791	6	0.00246815	6	0.0147779	6	0.00918256	6	0.00624348	6	0.00868116	6	0.00543081	6	0.01128451	6	0.00895792	6	0.01154745
6.2	0.00437851	6.2	0.00325882	6.2	0.01123987	6.2	0.00872036	6.2	0.00936963	6.2	0.01028073	6.2	0.01112558	6.2	0.00003531	6.2	0.01397302	6.2	0.00751856	6.2	0.00499476	6.2	0.01171451	6.2	0.0099736	6.2	0.01324395	6.2	0.0177435	6.2	0.00701366
6.4	0.00692977	6.4	0.00702721	6.4	0.00826673	6.4	0.01230025	6.4	0.00796507	6.4	0.0111122	6.4	0.00835347	6.4	0.00320751	6.4	0.01647121	6.4	0.01081795	6.4	0.00583676	6.4	0.0089738	6.4	0.00706938	6.4	0.00816858	6.4	0.00963995	6.4	0.00921726
6.6	0.00852124	6.6	0.00119095	6.6	0.00591115	6.6	0.01109605	6.6	0.00773107	6.6	0.00991384	6.6	0.00829044	6.6	0.00715265	6.6	0.01514042	6.6	0.01197067	6.6	0.00697314	6.6	0.00670756	6.6	0.00777157	6.6	0.00539668	6.6	0.01275712	6.6	0.00937723
6.8	0.00858109	6.8	0.00898661	6.8	0.01185262	6.8	0.00927217	6.8	0.00516513	6.8	0.01105535	6.8	0.01436456	6.8	0.00763557	6.8	0.01309412	6.8	0.00984141	6.8	0.00873453	6.8	0.00947645	6.8	0.00674771	6.8	0.00843495	6.8	0.01232523	6.8	0.010787
7	0.00615832	7	0.00227656	7	0.01084343	7	0.00843368	7	0.00654724	7	0.01178986	7	0.01285443	7	0.00281007	7	0.00678054	7	0.01245525	7	0.01418838	7	0.0076776	7	0.00628757	7	0.01388364	7	0.01633421	7	0.01464966
7.2	0.00374691	7.2	0.00219047	7.2	0.01134031	7.2	0.01024067	7.2	0.00820769	7.2	0.01036931	7.2	0.01135269	7.2	0.00559741	7.2	0.01473928	7.2	0.01232589	7.2	0.00767107	7.2	0.0069392	7.2	0.01361596	7.2	0.0097955	7.2	0.01125309	7.2	0.01695938
7.4	0.00646244	7.4	0.00463246	7.4	0.00978468	7.4	0.00549279	7.4	0.0093622	7.4	0.00734088	7.4	0.00587077	7.4	0.0056089	7.4	0.01755952	7.4	0.01359148	7.4	0.0083459	7.4	0.00654651	7.4	0.00956684	7.4	0.01424421	7.4	0.01345718	7.4	0.01176331
7.6	0.00476444	7.6	0.00559539	7.6	0.00951662	7.6	0.00887603	7.6	0.00540926	7.6	0.01056864	7.6	0.00797508	7.6	0.00405363	7.6	0.01164205	7.6	0.0149935	7.6	0.01060512	7.6	0.01125983	7.6	0.01111791	7.6	0.01282107	7.6	0.01412007	7.6	0.00921002
7.8	0.00954591	7.8	0.00296541	7.8	0.01412863	7.8	0.00702613	7.8	0.00904399	7.8	0.01180227	7.8	0.01268503	7.8	0.0081837	7.8	0.01732692	7.8	0.01328546	7.8	0.01021774	7.8	0.00685677	7.8	0.01196001	7.8	0.00990519	7.8	0.01288262	7.8	0.00957138
8	0.00675677	8	0.00148482	8	0.01427959	8	0.01433335	8	0.0096082	8	0.01085678	8	0.01288684	8	0.00757499	8	0.01849503	8	0.00878618	8	0.01026149	8	0.00658276	8	0.01125757	8	0.00927563	8	0.00860652	8	0.01027066
8.2	0.00794641	8.2	0.00610551	8.2	0.01067858	8.2	0.01016407	8.2	0.00272683	8.2	0.0121033	8.2	0.01197215	8.2	0.00821499	8.2	0.01832514	8.2	0.01512225	8.2	0.00636358	8.2	0.00851614	8.2	0.01398491	8.2	0.01440495	8.2	0.01134038	8.2	0.01063851
8.4	0.00370919	8.4	0.00407422	8.4	0.01054808	8.4	0.00903727	8.4	0.00629364	8.4	0.01178091	8.4	0.01556155	8.4	0.00474095	8.4	0.0166961	8.4	0.01053314	8.4	0.0072307	8.4	0.01151052	8.4	0.00995369	8.4	0.00878069	8.4	0.01702728	8.4	0.01065235
8.6	0.00742688	8.6	0.00810706	8.6	0.01085161	8.6	0.0091071	8.6	0.0046896	8.6	0.00998312	8.6	0.01437982	8.6	-0.00084069	8.6	0.0185996	8.6	0.00702411	8.6	0.00780431	8.6	0.00839012	8.6	0.00963964	8.6	0.01325298	8.6	0.01635985	8.6	0.00735758
8.8	0.01253653	8.8	0.00496583	8.8	0.00996664	8.8	0.01156027	8.8	0.00483704	8.8	0.01275881	8.8	0.01242063	8.8	0.00369759	8.8	0.01417217	8.8	0.01231619	8.8	0.00767546	8.8	0.01055045	8.8	0.01002833	8.8	0.0133191	8.8	0.01875928	8.8	0.00941548
9	0.0059656	9	0.00536884	9	0.01238852	9	0.01101958	9	0.00961935	9	0.01661037	9	0.01059923	9	0.00169061	9	0.01375011	9	0.01201521	9	0.01308631	9	0.01203962	9	0.01109926	9	0.01272319	9	0.01467749	9	0.00706389
9.2	0.0034197	9.2	0.00586657	9.2	0.01336865	9.2	0.01082771	9.2	0.01029877	9.2	0.01380431	9.2	0.01184341	9.2	0.00935499	9.2	0.02235988	9.2	0.01210985	9.2	0.00867646	9.2	0.00898601	9.2	0.01015808	9.2	0.01368725	9.2	0.01841824	9.2	0.0127743
9.4	0.00639242	9.4	0.00736839	9.4	0.00958397	9.4	0.01322378	9.4	0.01120379	9.4	0.01142769	9.4	0.01642258	9.4	0.00526732	9.4	0.01624827	9.4	0.01613994	9.4	0.00783449	9.4	0.00641405	9.4	0.0104971	9.4	0.01202083	9.4	0.01391816	9.4	0.0150617
9.6	0.00529734	9.6	0.00125865	9.6	0.01359458	9.6	0.01161523	9.6	0.00688723	9.6	0.01083297	9.6	0.01247085	9.6	0.00709277	9.6	0.01676896	9.6	0.01121543	9.6	0.00786078	9.6	0.00976846	9.6	0.00714769	9.6	0.01424531	9.6	0.01484886	9.6	0.01014938
9.8	0.00477128	9.8	0.00280221	9.8	0.01051988	9.8	0.01106174	9.8	0.00468078	9.8	0.01107517	9.8	0.01227571	9.8	0.00926484	9.8	0.02060778	9.8	0.01307365	9.8	0.00787771	9.8	0.0123754	9.8	0.00884639	9.8	0.01315405	9.8	0.01341807	9.8	0.00981381
10	0.00973178	10	0.0037926	10	0.01115185	10	0.00542532	10	0.01111495	10	0.01305279	10	0.01817085	10	0.0063416	10	0.02018701	10	0.01671514	10	0.00727888	10	0.01179263	10	0.0077365	10	0.01217255	10	0.01672327	10	0.01259427
10.2	0.00647236	10.2	0.00569417	10.2	0.01334586	10.2	0.01160048	10.2	0.00452812	10.2	0.0096649	10.2	0.01714898	10.2	0.00642822	10.2	0.01704645	10.2	0.01966561	10.2	0.00953335	10.2	0.01019787	10.2	0.01045765	10.2	0.01431514	10.2	0.01301784	10.2	0.01118462
10.4	0.00769107	10.4	0.01133916	10.4	0.01163476	10.4	0.01239949	10.4	0.01429552	10.4	0.00989208	10.4	0.009861	10.4	0.00840401	10.4	0.02186697	10.4	0.01437473	10.4	0.00290919	10.4	0.01110274	10.4	0.01172778	10.4	0.01376648	10.4	0.01024027	10.4	0.01421857
10.6	0.00911774	10.6	-0.00079399	10.6	0.01400084	10.6	0.01372552	10.6	0.01060767	10.6	0.01119594	10.6	0.01471021	10.6	0.00983349	10.6	0.01841518	10.6	0.01049089	10.6	0.01071087	10.6	0.01337279	10.6	0.00713082	10.6	0.01320705	10.6	0.01004196	10.6	0.01016937
10.8	0.01229808	10.8	0.00930673	10.8	0.01288581	10.8	0.01305403	10.8	0.01114226	10.8	0.01512442	10.8	0.01290788	10.8	0.00932517	10.8	0.01961107	10.8	0.01905373	10.8	0.00902124	10.8	0.01007712	10.8	0.01500211	10.8	0.01030731	10.8	0.01986775	10.8	0.01502765
11	0.01004591	11	0.00654205	11	0.0144414	11	0.01196875	11	0.0062758	11	0.01572305	11	0.01096877	11	0.00888746	11	0.01622018	11	0.01231512	11	0.00770218	11	0.00653571	11	0.01546201	11	0.01276449	11	0.01623852	11	0.00932973
11.2	0.010078	11.2	0.00566706	11.2	0.00957269	11.2	0.01013438	11.2	0.00849531	11.2	0.01042947	11.2	0.01283194	11.2	0.00697236	11.2	0.01838584	11.2	0.01532019	11.2	0.00985553	11.2	0.01499113	11.2	0.00334162	11.2	0.01416807	11.2	0.01701074	11.2	0.01372708
11.4	0.01262562	11.4	0.00703226	11.4	0.01635119	11.4	0.01064236	11.4	0.0079633	11.4	0.01966405	11.4	0.01486643	11.4	0.00547372	11.4	0.0188734	11.4	0.01291545	11.4	0.00856777	11.4	0.0138021	11.4	0.00772387	11.4	0.01284132	11.4	0.0194311	11.4	0.01164155
11.6	0.01003541	11.6	0.00767236	11.6	0.01363426	11.6	0.01024046	11.6	0.00724865	11.6	0.0157602	11.6	0.01276591	11.6	0.01192378	11.6	0.01718414	11.6	0.01290448	11.6	0.01352427	11.6	0.01358327	11.6	0.01179378	11.6	0.01487172	11.6	0.01874321	11.6	0.01330065
11.8	0.00742236	11.8	0.00625606	11.8	0.01548455	11.8	0.0163283	11.8	0.00957349	11.8	0.01303668	11.8	0.01510428	11.8	0.00951051	11.8	0.01599788	11.8	0.0118913	11.8	0.00919322	11.8	0.01353043	11.8	0.01036826	11.8	0.01222254	11.8	0.01826937	11.8	0.01300154
12	0.00692232	12	0.00462337	12	0.01333768	12	0.01374545	12	0.00829919	12	0.01673952	12	0.01402883	12	0.00657219	12	0.0188867	12	0.01422514	12	0.01129372	12	0.00946415	12	0.01514802	12	0.0115261	12	0.01537673	12	0.01095364
12.2	0.00664235	12.2	0.00906821	12.2	0.01575528	12.2	0.01285123	12.2	0.00579777	12.2	0.01887329	12.2	0.01567282	12.2	0.00825638	12.2	0.0159411	12.2	0.01061172	12.2	0.00918068	12.2	0.0108216	12.2	0.01423297	12.2	0.01162828	12.2	0.01915864	12.2	0.00990491
12.4	0.01513341	12.4	0.00588182	12.4	0.01473329	12.4	0.01008778	12.4	0.00974957	12.4	0.01071977	12.4	0.01636283	12.4	0.01200241	12.4	0.01781435	12.4	0.01977585	12.4	0.00818291	12.4	0.01355154	12.4	0.01217038	12.4	0.0094849	12.4	0.02030367	12.4	0.01820949
12.6	0.01116417	12.6	0.01077542	12.6	0.00954351	12.6	0.01611503	12.6	0.00902693	12.6	0.01283754	12.6	0.01355364	12.6	0.00922786	12.6	0.01501966	12.6	0.01635173	12.6	0.01057917	12.6	0.01265975	12.6	0.01235845	12.6	0.0140799	12.6	0.0145789	12.6	0.01277308
12.8	0.01688704	12.8	0.00672407	12.8	0.01654191	12.8	0.00733719	12.8	0.00778808	12.8	0.0100414	12.8	0.0146579	12.8	0.00865324	12.8	0.0178504	12.8	0.01616512	12.8	0.00981692	12.8	0.0111454	12.8	0.01076643	12.8	0.01729989	12.8	0.01344975	12.8	0.01119796
13	0.00999841	13	0.0036224	13	0.01421653	13	0.01056668	13	0.00724199	13	0.01295328	13	0.01029452	13	0.00676302	13	0.01522421	13	0.01489379	13	0.01026627	13	0.00993202	13	0.01305796	13	0.01454206	13	0.01704933	13	0.01007988
13.2	0.00853399	13.2	0.00431456	13.2	0.01145545	13.2	0.00942181	13.2	0.00882022	13.2	0.01810993	13.2	0.01266472	13.2	0.00840366	13.2	0.01723901	13.2	0.01220601	13.2	0.00786328	13.2	0.01182896	13.2	0.01468869	13.2	0.01595207	13.2	0.01488408	13.2	0.00983665
13.4	0.01535669	13.4	0.00510711	13.4	0.011918	13.4	0.01005532	13.4	0.01063269	13.4	0.0117871	13.4	0.01155213	13.4	0.01022361	13.4	0.02207894	13.4	0.01205689	13.4	0.00970087	13.4	0.01145338	13.4	0.00985637	13.4	0.01583888	13.4	0.01855277	13.4	0.01904096
13.6	0.00719747	13.6	0.00756406	13.6	0.01287674	13.6	0.01639863	13.6	0.00781487	13.6	0.01713202	13.6	0.0186321	13.6	0.01067982	13.6	0.01852765	13.6	0.0142254	13.6	0.01046679	13.6	0.01015087	13.6	0.01390752	13.6	0.01393448	13.6	0.01896086	13.6	0.01341048
13.8	0.00784737	13.8	0.00527198	13.8	0.01560962	13.8	0.00918853	13.8	0.01387729	13.8	0.01243208	13.8	0.01869472	13.8	0.00926586	13.8	0.02149435	13.8	0.0113849	13.8	0.01360821	13.8	0.01545757	13.8	0.01595746	13.8	0.01488492	13.8	0.0184158	13.8	0.01670483
14	0.00863164	14	0.00481892	14	0.01498149	14	0.01144803	14	0.00800061	14	0.01736217	14	0.01979416	14	0.01370418	14	0.01997552	14	0.01296717	14	0.01294442	14	0.00716973	14	0.01295465	14	0.01729436	14	0.01832733	14	0.0167271
14.2	0.01061343	14.2	0.00490544	14.2	0.01729564	14.2	0.0108452	14.2	0.01466199	14.2	0.0105114	14.2	0.01440084	14.2	0.00912322	14.2	0.01969219	14.2	0.01433753	14.2	0.01173277	14.2	0.01134087	14.2	0.01032861	14.2	0.01149855	14.2	0.02087024	14.2	0.01227466
14.4	0.00809875	14.4	0.0078126	14.4	0.0184805	14.4	0.01223337	14.4	0.00871518	14.4	0.01322223	14.4	0.0140352	14.4	0.00939628	14.4	0.02029837	14.4	0.01510208	14.4	0.01491692	14.4	0.01103991	14.4	0.01136558	14.4	0.01963537	14.4	0.02216697	14.4	0.01219466
14.6	0.01003073	14.6	0.0105764	14.6	0.01485593	14.6	0.01642254	14.6	0.00746355	14.6	0.01228132	14.6	0.0110582	14.6	0.01212585	14.6	0.02318612	14.6	0.01222938	14.6	0.01021617	14.6	0.00898928	14.6	0.01439295	14.6	0.015228	14.6	0.02091326	14.6	0.0178452
14.8	0.01388001	14.8	0.00840608	14.8	0.01405974	14.8	0.01043426	14.8	0.01664986	14.8	0.01752634	14.8	0.01438171	14.8	0.00835079	14.8	0.01971118	14.8	0.01290581	14.8	0.00743175	14.8	0.00685381	14.8	0.01299957	14.8	0.01428191	14.8	0.01905998	14.8	0.01479899
15	0.00938389	15	0.0057168	15	0.01635652	15	0.01264029	15	0.01157817	15	0.01429512	15	0.01689249	15	0.01080255	15	0.02098469	15	0.01672053	15	0.00926115	15	0.01300824	15	0.01339364	15	0.01297079	15	0.01717048	15	0.01593401
15.2	0.0138772	15.2	0.01102349	15.2	0.02114977	15.2	0.01389774	15.2	0.01058062	15.2	0.01558854	15.2	0.01391379	15.2	0.00600208	15.2	0.02088448	15.2	0.01188585	15.2	0.00918529	15.2	0.0112728	15.2	0.01568871	15.2	0.01287295	15.2	0.01647825	15.2	0.01877938
15.4	0.0054589	15.4	0.00571194	15.4	0.01769831	15.4	0.01441194	15.4	0.00951024	15.4	0.01098487	15.4	0.01411675	15.4	0.00992333	15.4	0.01982068	15.4	0.01606134	15.4	0.01106461	15.4	0.01270885	15.4	0.01287277	15.4	0.01812191	15.4	0.02122346	15.4	0.01334728
15.6	0.00731279	15.6	0.00316458	15.6	0.01710485	15.6	0.0130451	15.6	0.00619479	15.6	0.01451411	15.6	0.01527746	15.6	0.01288882	15.6	0.01856945	15.6	0.02078974	15.6	0.01412616	15.6	0.00958722	15.6	0.01078833	15.6	0.0147025	15.6	0.01875505	15.6	0.01292453
15.8	0.01208468	15.8	0.00631746	15.8	0.01822783	15.8	0.01199228	15.8	0.00723888	15.8	0.01189401	15.8	0.01323997	15.8	0.00838551	15.8	0.02212036	15.8	0.01333112	15.8	0.01398468	15.8	0.01658292	15.8	0.01016828	15.8	0.01010434	15.8	0.01804643	15.8	0.01454946
16	0.00787021	16	0.00465343	16	0.01428013	16	0.01649842	16	0.01167071	16	0.01123594	16	0.01861282	16	0.01237855	16	0.0241718	16	0.01521072	16	0.00859273	16	0.01765858	16	0.01621061	16	0.01823344	16	0.01996159	16	0.01477211
16.2	0.01072641	16.2	0.00927833	16.2	0.01638017	16.2	0.01869828	16.2	0.01037369	16.2	0.01304238	16.2	0.01670348	16.2	0.01060489	16.2	0.0200412	16.2	0.01944435	16.2	0.01034421	16.2	0.01033987	16.2	0.01226095	16.2	0.0157935	16.2	0.01964622	16.2	0.01426762
16.4	0.01019666	16.4	0.00940719	16.4	0.01661366	16.4	0.01238581	16.4	0.01390591	16.4	0.0159673	16.4	0.01506055	16.4	0.00645223	16.4	0.02183246	16.4	0.0157422	16.4	0.01290505	16.4	0.01393286	16.4	0.01154611	16.4	0.01276644	16.4	0.01592885	16.4	0.0111187
16.6	0.01420443	16.6	0.00549226	16.6	0.01981688	16.6	0.01469457	16.6	0.00634813	16.6	0.01163063	16.6	0.01377175	16.6	0.01142792	16.6	0.02180193	16.6	0.01595874	16.6	0.01603143	16.6	0.01146269	16.6	0.01424613	16.6	0.01461398	16.6	0.01497889	16.6	0.01021314
16.8	0.01065153	16.8	0.00661955	16.8	0.01468	16.8	0.01525634	16.8	0.0104718	16.8	0.01721039	16.8	0.01670625	16.8	0.00832467	16.8	0.01771148	16.8	0.01732076	16.8	0.01497769	16.8	0.01442554	16.8	0.01078586	16.8	0.01436292	16.8	0.02380523	16.8	0.01586685
17	0.01403274	17	0.00892283	17	0.01622772	17	0.01366513	17	0.01319497	17	0.01279345	17	0.01398581	17	0.01045866	17	0.01940249	17	0.01905025	17	0.00958458	17	0.01629904	17	0.01574784	17	0.01592022	17	0.02027211	17	0.01698483
17.2	0.01479565	17.2	0.01071993	17.2	0.01801066	17.2	0.00781499	17.2	0.01067268	17.2	0.01223907	17.2	0.0173028	17.2	0.00933377	17.2	0.0223337	17.2	0.01348444	17.2	0.00739292	17.2	0.01145825	17.2	0.01077417	17.2	0.01421377	17.2	0.01495561	17.2	0.01005603
17.4	0.01469611	17.4	0.01375476	17.4	0.01894139	17.4	0.01079643	17.4	0.01130169	17.4	0.01584753	17.4	0.01419114	17.4	0.01225186	17.4	0.02347963	17.4	0.01580344	17.4	0.01079322	17.4	0.01184488	17.4	0.01310945	17.4	0.01185359	17.4	0.01992748	17.4	0.01810658
17.6	0.01221949	17.6	0.00317073	17.6	0.01508804	17.6	0.01421151	17.6	0.01176164	17.6	0.0168299	17.6	0.021468	17.6	0.01008275	17.6	0.02088917	17.6	0.01994989	17.6	0.01323352	17.6	0.013443	17.6	0.01203599	17.6	0.01963808	17.6	0.0255937	17.6	0.01777113
17.8	0.01478518	17.8	0.00589068	17.8	0.01358972	17.8	0.01302278	17.8	0.01115621	17.8	0.01700339	17.8	0.01284827	17.8	0.01313758	17.8	0.02625049	17.8	0.01780688	17.8	0.01382665	17.8	0.01172112	17.8	0.01112365	17.8	0.01501726	17.8	0.02016262	17.8	0.01518286
18	0.01218077	18	0.00498518	18	0.01704753	18	0.0111272	18	0.01324667	18	0.01103046	18	0.01237268	18	0.01147704	18	0.02473401	18	0.01830654	18	0.01580237	18	0.01140745	18	0.01375565	18	0.01625755	18	0.02123248	18	0.013595
18.2	0.01211288	18.2	0.00986611	18.2	0.02063724	18.2	0.01553251	18.2	0.01329088	18.2	0.0161869	18.2	0.01815185	18.2	0.00953967	18.2	0.01901815	18.2	0.01679249	18.2	0.0119563	18.2	0.01565843	18.2	0.01012065	18.2	0.01624847	18.2	0.02090276	18.2	0.01474971
18.4	0.0155034	18.4	0.00750984	18.4	0.01519246	18.4	0.01168942	18.4	0.01228041	18.4	0.01057397	18.4	0.0146959	18.4	0.00755163	18.4	0.01564496	18.4	0.01624479	18.4	0.01056929	18.4	0.01640478	18.4	0.01257561	18.4	0.01809221	18.4	0.02402006	18.4	0.01567585
18.6	0.00927099	18.6	0.00486478	18.6	0.01654197	18.6	0.01632406	18.6	0.00728938	18.6	0.01908861	18.6	0.01097043	18.6	0.01116958	18.6	0.0238318	18.6	0.01606494	18.6	0.00954931	18.6	0.01112526	18.6	0.0150692	18.6	0.01501333	18.6	0.02121583	18.6	0.01591695
18.8	0.01457105	18.8	0.00666071	18.8	0.01530614	18.8	0.01330405	18.8	0.01524598	18.8	0.01612128	18.8	0.01813632	18.8	0.00718906	18.8	0.02187332	18.8	0.01561256	18.8	0.01615	18.8	0.01465979	18.8	0.01501908	18.8	0.01855902	18.8	0.02087799	18.8	0.01589734
19	0.01276911	19	0.00936394	19	0.0161968	19	0.01748355	19	0.01530619	19	0.01590543	19	0.01549561	19	0.0127818	19	0.02327354	19	0.01967604	19	0.01754043	19	0.01474036	19	0.01475837	19	0.01452146	19	0.02070342	19	0.01456495
19.2	0.0120721	19.2	0.00935432	19.2	0.01715101	19.2	0.00972494	19.2	0.00623072	19.2	0.01873512	19.2	0.01880598	19.2	0.01009888	19.2	0.02118378	19.2	0.01433663	19.2	0.01003035	19.2	0.01287197	19.2	0.01389108	19.2	0.01642853	19.2	0.02284506	19.2	0.01516674
19.4	0.00905891	19.4	0.00845887	19.4	0.02055213	19.4	0.01533765	19.4	0.01145041	19.4	0.01756618	19.4	0.01920609	19.4	0.01130024	19.4	0.02106485	19.4	0.01547169	19.4	0.01442108	19.4	0.01167547	19.4	0.01291109	19.4	0.01555648	19.4	0.02252181	19.4	0.00972444
19.6	0.00704197	19.6	0.01181603	19.6	0.01464576	19.6	0.01598485	19.6	0.01184686	19.6	0.01705871	19.6	0.016073	19.6	0.01589539	19.6	0.02311186	19.6	0.0165632	19.6	0.01333876	19.6	0.01522595	19.6	0.00998634	19.6	0.01715798	19.6	0.01656785	19.6	0.01740997
19.8	0.01100929	19.8	0.00766192	19.8	0.01761681	19.8	0.01731553	19.8	0.01237557	19.8	0.01205814	19.8	0.01724374	19.8	0.00841366	19.8	0.02101783	19.8	0.01612173	19.8	0.01550652	19.8	0.01669379	19.8	0.00814731	19.8	0.01408239	19.8	0.02118135	19.8	0.0134756
20	0.01016225	20	0.00942643	20	0.02094139	20	0.01460276	20	0.0102414	20	0.01738815	20	0.01604891	20	0.01298746	20	0.02142914	20	0.01770917	20	0.01564762	20	0.01651081	20	0.01571552	20	0.01214363	20	0.01791508	20	0.01655446
20.2	0.01279353	20.2	0.00660603	20.2	0.01456296	20.2	0.01216764	20.2	0.01195737	20.2	0.01772966	20.2	0.01669062	20.2	0.01364652	20.21	0.02245853	20.21	0.01713455	20.21	0.01280197	20.21	0.01386751	20.21	0.01438412	20.21	0.01612668	20.21	0.01793978	20.21	0.01787612
20.4	0.01166624	20.4	0.00392523	20.4	0.0154511	20.4	0.01260641	20.4	0.0152202	20.4	0.01038022	20.4	0.01485544	20.4	0.01171758	20.4	0.02380341	20.4	0.01945679	20.4	0.01508761	20.4	0.01521185	20.4	0.0107968	20.4	0.01765132	20.4	0.0225014	20.4	0.01652796
20.6	0.00979448	20.6	0.00648635	20.6	0.02107005	20.6	0.01301692	20.6	0.01594673	20.6	0.01525578	20.6	0.01749734	20.6	0.01066714	20.6	0.02629186	20.6	0.01550214	20.6	0.01205992	20.6	0.01299013	20.6	0.01337596	20.6	0.01935607	20.6	0.01946762	20.6	0.01294523
20.8	0.01597908	20.8	0.00669636	20.8	0.01468326	20.8	0.01372279	20.8	0.01180266	20.8	0.01503888	20.8	0.01456526	20.8	0.00899687	20.8	0.02374385	20.8	0.01982854	20.8	0.01284732	20.8	0.01615639	20.8	0.01287697	20.8	0.01603772	20.8	0.02377646	20.8	0.01396199
21	0.02137437	21	0.00820598	21	0.01667018	21	0.013089	21	0.01420551	21	0.01960051	21	0.02049479	21	0.01050143	21	0.02457766	21	0.02175816	21	0.01187257	21	0.01076721	21	0.01364512	21	0.01628316	21	0.02281589	21	0.01547046
21.2	0.00988522	21.2	0.00803548	21.2	0.01344858	21.2	0.01437362	21.2	0.01550439	21.2	0.01639812	21.2	0.02001135	21.2	0.0124678	21.2	0.02417642	21.2	0.01647552	21.2	0.01647026	21.2	0.01222481	21.2	0.00863646	21.2	0.01760388	21.2	0.0202283	21.2	0.0140263
21.4	0.01341026	21.4	0.00929903	21.4	0.01473634	21.4	0.01588846	21.4	0.01020093	21.4	0.0115467	21.4	0.01735397	21.4	0.01008309	21.4	0.02102571	21.4	0.01843268	21.4	0.01270634	21.4	0.0223388	21.4	0.01102476	21.4	0.01813919	21.4	0.02243	21.4	0.01584513
21.6	0.01129737	21.6	0.01021991	21.6	0.02284142	21.6	0.01264242	21.6	0.01107318	21.6	0.01913331	21.6	0.02194394	21.6	0.00936359	21.6	0.02213159	21.6	0.01600781	21.6	0.01481734	21.6	0.01641806	21.6	0.01283882	21.6	0.02068468	21.6	0.02754855	21.6	0.0182649
21.8	0.01564834	21.8	0.00774377	21.8	0.01490759	21.8	0.0150112	21.8	0.01311469	21.8	0.01688495	21.8	0.0152632	21.8	0.0121586	21.8	0.02056977	21.8	0.01581805	21.8	0.01379132	21.8	0.01260341	21.8	0.01261499	21.8	0.01743277	21.8	0.02324444	21.8	0.0119461
22	0.01481102	22	0.00499759	22	0.01612571	22	0.0119818	22	0.01455392	22	0.01330267	22	0.01944755	22	0.01566421	22	0.02281279	22	0.01719349	22	0.01290439	22	0.01520403	22	0.01423762	22	0.01650568	22	0.02262069	22	0.01659305
22.2	0.01401103	22.2	0.00793863	22.2	0.01913229	22.2	0.01129158	22.2	0.01382236	22.2	0.01400498	22.2	0.01484182	22.2	0.01328397	22.21	0.02018601	22.21	0.01496949	22.21	0.0191473	22.21	0.014509	22.21	0.01163828	22.21	0.02098179	22.21	0.01909133	22.21	0.01598052
22.4	0.01783104	22.4	0.01051585	22.4	0.0215096	22.4	0.01760377	22.4	0.01651888	22.4	0.01545431	22.4	0.01725753	22.4	0.01332595	22.4	0.0210459	22.4	0.020664	22.4	0.0187132	22.4	0.01488822	22.4	0.01698299	22.4	0.01631739	22.4	0.01930249	22.4	0.01544533
22.6	0.01529555	22.6	0.01452353	22.6	0.01752336	22.6	0.01722735	22.6	0.00758066	22.6	0.01576704	22.6	0.01999312	22.6	0.01180215	22.6	0.02567316	22.6	0.01282072	22.6	0.01734236	22.6	0.01404778	22.6	0.01328663	22.6	0.01891775	22.6	0.0229289	22.6	0.01387055
22.8	0.01634074	22.8	0.00907372	22.8	0.01634345	22.8	0.01822657	22.8	0.01121576	22.8	0.01799881	22.8	0.01739168	22.8	0.00828721	22.8	0.02063846	22.8	0.01689987	22.8	0.01210894	22.8	0.01928581	22.8	0.01682303	22.8	0.01436255	22.8	0.02238823	22.8	0.01612097
23	0.01393594	23	0.00675436	23	0.01682685	23	0.01939717	23	0.01647893	23	0.01855152	23	0.01814201	23	0.01460791	23	0.02309054	23	0.01688605	23	0.01427874	23	0.01091025	23	0.01391077	23	0.01660139	23	0.02021448	23	0.01994912
23.2	0.01558128	23.2	0.01040007	23.2	0.0217657	23.2	0.0121131	23.2	0.01725023	23.2	0.01631551	23.2	0.0168543	23.2	0.0121196	23.2	0.01871009	23.2	0.01222087	23.2	0.01227586	23.2	0.01160408	23.2	0.0119779	23.2	0.02072147	23.2	0.02015259	23.2	0.01494264
23.4	0.01934066	23.4	0.01298581	23.4	0.01853186	23.4	0.014821	23.4	0.01075375	23.4	0.01589571	23.4	0.0182357	23.4	0.01784383	23.4	0.02261777	23.4	0.01724564	23.4	0.01423874	23.4	0.01731529	23.4	0.01936221	23.4	0.01722847	23.4	0.0227068	23.4	0.01618629
23.6	0.01293806	23.6	0.00803992	23.6	0.01719532	23.6	0.01760504	23.6	0.01038162	23.6	0.01725923	23.6	0.02224399	23.6	0.00926506	23.6	0.02491246	23.6	0.01713867	23.6	0.01499761	23.6	0.01618092	23.6	0.01591981	23.6	0.01732339	23.6	0.02255234	23.6	0.01974913
23.8	0.01431868	23.8	0.01037115	23.8	0.0240689	23.8	0.01755136	23.8	0.01294026	23.8	0.01521122	23.8	0.02261747	23.8	0.01538282	23.8	0.02094436	23.8	0.01991495	23.8	0.01851598	23.8	0.01225597	23.8	0.0135819	23.8	0.01923743	23.8	0.02236913	23.8	0.01388458
24	0.01330297	24	0.00858197	24	0.01721516	24	0.02007729	24	0.01502157	24	0.01624183	24	0.01863327	24	0.01633819	24	0.02261682	24	0.01798447	24	0.01655583	24	0.01241263	24	0.01414817	24	0.01625601	24	0.02246878	24	0.01721736
24.2	0.00988445	24.2	0.00911889	24.2	0.01916579	24.2	0.00797242	24.2	0.0153988	24.2	0.01682664	24.2	0.01738019	24.2	0.00739249	24.2	0.023012	24.2	0.02129022	24.2	0.01419138	24.2	0.01641431	24.2	0.01470958	24.2	0.016288	24.2	0.01869292	24.2	0.01598031
24.4	0.0149568	24.4	0.01226593	24.4	0.02246657	24.4	0.0167717	24.4	0.01711895	24.4	0.01766988	24.4	0.01663868	24.4	0.01135712	24.4	0.02504082	24.4	0.02384887	24.4	0.01696491	24.4	0.0134439	24.4	0.01552733	24.4	0.01773152	24.4	0.02241321	24.4	0.02039702
24.6	0.01366164	24.6	0.00881338	24.6	0.01258692	24.6	0.01375653	24.6	0.01620606	24.6	0.02162058	24.6	0.01935538	24.6	0.01238714	24.6	0.02568857	24.6	0.02131478	24.6	0.01792885	24.6	0.01331625	24.6	0.01699825	24.6	0.0201865	24.6	0.02557511	24.6	0.01413162
24.8	0.01595742	24.8	0.00783438	24.8	0.02004455	24.8	0.01821953	24.8	0.01580259	24.8	0.01743006	24.8	0.01607522	24.8	0.00833307	24.8	0.02596716	24.8	0.01988254	24.8	0.0092449	24.8	0.01558161	24.8	0.01747341	24.8	0.01253994	24.8	0.02476773	24.8	0.01260453
25	0.01454376	25	0.00913155	25	0.01858866	25	0.0168894	25	0.01531264	25	0.01847333	25	0.02050172	25	0.00844156	25	0.02645503	25	0.02131439	25	0.01683782	25	0.01773869	25	0.01454462	25	0.01704349	25	0.02273544	25	0.0148262
25.2	0.01432548	25.2	0.0158388	25.2	0.01899227	25.2	0.01487295	25.2	0.01190181	25.2	0.01614363	25.2	0.01609917	25.2	0.01100146	25.2	0.02489483	25.2	0.01557054	25.2	0.01529641	25.2	0.01175424	25.2	0.01781241	25.2	0.0167932	25.2	0.02179285	25.2	0.01751411
25.4	0.01153511	25.4	0.01065314	25.4	0.01891528	25.4	0.01418395	25.4	0.00912541	25.4	0.01907746	25.4	0.01758066	25.4	0.0142381	25.4	0.02060432	25.4	0.0178842	25.4	0.01598692	25.4	0.01509126	25.4	0.01268799	25.4	0.01979048	25.4	0.02318052	25.4	0.01744708
25.6	0.01242209	25.6	0.00753856	25.6	0.0231909	25.6	0.01835023	25.6	0.01276213	25.6	0.01540973	25.6	0.01817351	25.6	0.01248064	25.6	0.02973347	25.6	0.01251654	25.6	0.01597096	25.6	0.01309296	25.6	0.01553442	25.6	0.02270092	25.6	0.02438164	25.6	0.01667493
25.8	0.01270832	25.8	0.00707114	25.8	0.01870786	25.8	0.0165888	25.8	0.01551611	25.8	0.01513613	25.8	0.0188337	25.8	0.01549334	25.8	0.0243265	25.8	0.02100358	25.8	0.01176778	25.8	0.01446043	25.8	0.01741908	25.8	0.01629576	25.8	0.02601782	25.8	0.01214489
26	0.01379758	26	0.00752812	26	0.0189782	26	0.01851244	26	0.01494994	26	0.02219164	26	0.01968485	26	0.01317644	26	0.02617759	26	0.01697703	26	0.01693463	26	0.01490352	26	0.01871124	26	0.02200542	26	0.02505037	26	0.01569855
26.2	0.01485137	26.2	0.01006903	26.2	0.01871459	26.2	0.01577237	26.2	0.01379721	26.2	0.01583127	26.2	0.02277788	26.2	0.00830103	26.2	0.0233411	26.2	0.02063416	26.2	0.01226652	26.2	0.01707798	26.2	0.01539604	26.2	0.01352967	26.2	0.02431702	26.2	0.01700858
26.4	0.01864403	26.4	0.00701515	26.4	0.01726205	26.4	0.01835285	26.4	0.01369694	26.4	0.01921138	26.4	0.01640701	26.4	0.00765685	26.4	0.02195135	26.4	0.02197512	26.4	0.01441963	26.4	0.01922131	26.4	0.01704219	26.4	0.01643464	26.4	0.02285764	26.4	0.01466597
26.6	0.01460438	26.6	0.0135102	26.6	0.02138676	26.6	0.01656018	26.6	0.01371247	26.6	0.01850919	26.6	0.01521549	26.6	0.01109079	26.6	0.02428254	26.6	0.01899422	26.6	0.02244676	26.6	0.01485244	26.6	0.01494636	26.6	0.01832141	26.6	0.02609606	26.6	0.0187816
26.8	0.01673718	26.8	0.01597806	26.8	0.01811264	26.8	0.01638782	26.8	0.01118515	26.8	0.0192853	26.8	0.01676625	26.8	0.01118931	26.8	0.02339559	26.8	0.01845439	26.8	0.01222272	26.8	0.01812991	26.8	0.01554787	26.8	0.01966895	26.8	0.02722868	26.8	0.01631704
27	0.0159332	27	0.00625933	27	0.0178206	27	0.01464466	27	0.01185821	27	0.01740638	27	0.01687404	27	0.0155135	27	0.02462079	27	0.01977785	27	0.01306349	27	0.01211427	27	0.01803286	27	0.01908077	27	0.02736696	27	0.01541934
27.2	0.01490459	27.2	0.01157766	27.2	0.01759056	27.2	0.01179586	27.2	0.01124947	27.2	0.01830885	27.2	0.01807768	27.2	0.01273228	27.2	0.02371649	27.2	0.02070005	27.2	0.018159	27.2	0.01858336	27.2	0.01765361	27.2	0.02064845	27.2	0.0271636	27.2	0.01497436
27.4	0.01469775	27.4	0.00963555	27.4	0.02352647	27.4	0.01232998	27.4	0.01684741	27.4	0.01956122	27.4	0.01699147	27.4	0.01102135	27.4	0.02316225	27.4	0.02106749	27.4	0.0143823	27.4	0.018197	27.4	0.01464455	27.4	0.0142416	27.4	0.02585547	27.4	0.01348659
27.6	0.01160977	27.6	0.01067677	27.6	0.02045405	27.6	0.01974187	27.6	0.01339838	27.6	0.01696968	27.6	0.02162419	27.6	0.01106656	27.6	0.02219041	27.6	0.02534364	27.6	0.01569268	27.6	0.01699505	27.6	0.01528048	27.6	0.02039982	27.6	0.02511203	27.6	0.01390466
27.8	0.01823172	27.8	0.00988044	27.8	0.02475726	27.8	0.01235432	27.8	0.01508333	27.8	0.01385553	27.8	0.02207652	27.8	0.00820213	27.8	0.02496938	27.8	0.02244519	27.8	0.01267987	27.8	0.01807397	27.8	0.01677955	27.8	0.01661482	27.8	0.02331596	27.8	0.01427231
28	0.01428309	28	0.00952672	28	0.0212116	28	0.02216896	28	0.01328116	28	0.01929387	28	0.01961614	28	0.01502635	28	0.028442	28	0.02124026	28	0.01531838	28	0.01872194	28	0.01186214	28	0.0196947	28	0.02239867	28	0.01863931
28.2	0.01361235	28.2	0.01428172	28.2	0.01384583	28.2	0.01153921	28.2	0.01512003	28.2	0.01738587	28.2	0.02000575	28.2	0.01264738	28.2	0.022865	28.2	0.0142251	28.2	0.01437058	28.2	0.01909703	28.2	0.01537772	28.2	0.01950009	28.2	0.02537061	28.2	0.01923118
28.4	0.01474971	28.4	0.0084951	28.4	0.02028965	28.4	0.01445666	28.4	0.01289331	28.4	0.01999288	28.4	0.01811373	28.4	0.0111734	28.4	0.02901414	28.4	0.01615396	28.4	0.01474714	28.4	0.01895233	28.4	0.01631689	28.4	0.01837069	28.4	0.0228	28.4	0.02124951
28.6	0.01736915	28.6	0.01468259	28.6	0.02042742	28.6	0.01397866	28.6	0.01253622	28.6	0.01833992	28.6	0.01500599	28.6	0.01500795	28.6	0.02374426	28.6	0.01711313	28.6	0.01709126	28.6	0.01913236	28.6	0.01802311	28.6	0.01894479	28.6	0.02714791	28.6	0.01881577
28.8	0.01655819	28.8	0.01270394	28.8	0.02016418	28.8	0.01541502	28.8	0.01223086	28.8	0.01637545	28.8	0.01947358	28.8	0.01435089	28.8	0.02613979	28.8	0.01986654	28.8	0.01569055	28.8	0.0177793	28.8	0.01867165	28.8	0.02040791	28.8	0.023653	28.8	0.013962
29	0.01723211	29	0.01331762	29	0.01780219	29	0.0186768	29	0.0105201	29	0.01803826	29	0.01827339	29	0.0116885	29	0.0251295	29	0.01928184	29	0.01723588	29	0.01810237	29	0.01313124	29	0.01995399	29	0.02619026	29	0.01400725
29.2	0.01653996	29.2	0.00794459	29.2	0.01636012	29.2	0.01317994	29.2	0.01243141	29.2	0.0161756	29.2	0.0184915	29.2	0.01351085	29.2	0.02222499	29.2	0.01980031	29.2	0.01800981	29.2	0.01691256	29.2	0.01804063	29.2	0.01743375	29.2	0.02533941	29.2	0.01324537
29.4	0.02178546	29.4	0.01029485	29.4	0.02081635	29.4	0.0168059	29.4	0.01138458	29.4	0.01806403	29.4	0.01867056	29.4	0.01557402	29.4	0.02219781	29.4	0.02609731	29.4	0.0159078	29.4	0.01633225	29.4	0.01805523	29.4	0.0195761	29.4	0.02835242	29.4	0.0128314
29.6	0.01442082	29.6	0.0105843	29.6	0.02096657	29.6	0.01586313	29.6	0.01282912	29.6	0.01684057	29.6	0.02052972	29.6	0.01200669	29.6	0.02075766	29.6	0.02462856	29.6	0.01395468	29.6	0.01831793	29.6	0.01907492	29.6	0.01524057	29.6	0.02859184	29.6	0.01746421
29.8	0.01471281	29.8	0.01142471	29.8	0.02145914	29.8	0.01569016	29.8	0.01401886	29.8	0.01666479	29.8	0.01757819	29.8	0.00987867	29.8	0.02420047	29.8	0.02465241	29.8	0.01430934	29.8	0.01935843	29.8	0.01643926	29.8	0.02133609	29.8	0.02770109	29.8	0.01419162
30	-3.889216	30	-4.031198	30	-4.004539	30	-4.014523	30	-3.977768	30	-4.007595	30	-4.002332	30	-4.027052	30	-3.739807	30	-3.742405	30	-3.833915	30	-3.668218	30	-3.754991	30	-3.693612	30	-3.714789	30	-3.643509
30.2	-4.201902	30.2	-4.357471	30.2	-4.315084	30.2	-4.315813	30.2	-4.291726	30.2	-4.336352	30.2	-4.317092	30.2	-4.342161	30.2	-3.987729	30.2	-4.06418	30.2	-4.08634	30.2	-3.966511	30.2	-3.991067	30.2	-3.997759	30.2	-4.028337	30.2	-3.946609
30.4	-4.383539	30.4	-4.55104	30.4	-4.505932	30.4	-4.494217	30.4	-4.473666	30.4	-4.523766	30.4	-4.513742	30.4	-4.522674	30.4	-4.133626	30.4	-4.235104	30.4	-4.242679	30.4	-4.130105	30.4	-4.1413	30.4	-4.159584	30.4	-4.193374	30.4	-4.098732
30.6	-4.520064	30.6	-4.679634	30.6	-4.638241	30.6	-4.622121	30.6	-4.605356	30.6	-4.66312	30.6	-4.639474	30.6	-4.65419	30.6	-4.244483	30.6	-4.346124	30.6	-4.347412	30.6	-4.241177	30.6	-4.242608	30.6	-4.272772	30.6	-4.316711	30.6	-4.214376
30.8	-4.614593	30.8	-4.784477	30.8	-4.732664	30.8	-4.717062	30.8	-4.69554	30.8	-4.75823	30.8	-4.744074	30.8	-4.746388	30.8	-4.337753	30.8	-4.43913	30.8	-4.434489	30.8	-4.334462	30.8	-4.323071	30.8	-4.359372	30.8	-4.402647	30.8	-4.312425
31	-4.693399	31	-4.864717	31	-4.810179	31	-4.793779	31	-4.772719	31	-4.840012	31	-4.817866	31	-4.826549	31	-4.406415	31	-4.519503	31	-4.510242	31	-4.408063	31	-4.394453	31	-4.442183	31	-4.480841	31	-4.3848
31.2	-4.759114	31.2	-4.93615	31.2	-4.877984	31.2	-4.862546	31.2	-4.842921	31.2	-4.907284	31.2	-4.890893	31.2	-4.901349	31.2	-4.472886	31.2	-4.585724	31.2	-4.575156	31.2	-4.474306	31.2	-4.453459	31.2	-4.507558	31.2	-4.5451	31.2	-4.448751
31.4	-4.818508	31.4	-4.994965	31.4	-4.938159	31.4	-4.917708	31.4	-4.897439	31.4	-4.962969	31.4	-4.949157	31.4	-4.955837	31.4	-4.519891	31.4	-4.642642	31.4	-4.624734	31.4	-4.525676	31.4	-4.509424	31.4	-4.558437	31.4	-4.603882	31.4	-4.504952
31.6	-4.865456	31.6	-5.042017	31.6	-4.990559	31.6	-4.966626	31.6	-4.947458	31.6	-5.020544	31.6	-4.999757	31.6	-5.00361	31.6	-4.565176	31.6	-4.690947	31.6	-4.670011	31.6	-4.577977	31.6	-4.556737	31.6	-4.607555	31.6	-4.648857	31.6	-4.550473
31.8	-4.908143	31.8	-5.088665	31.8	-5.031856	31.8	-5.010897	31.8	-4.990597	31.8	-5.061461	31.8	-5.042126	31.8	-5.046998	31.8	-4.610168	31.8	-4.731162	31.8	-4.710173	31.8	-4.615793	31.8	-4.594764	31.8	-4.649531	31.8	-4.694522	31.8	-4.592118
32	-4.95202	32	-5.131726	32	-5.07521	32	-5.049578	32	-5.032444	32	-5.103988	32	-5.087892	32	-5.089374	32	-4.653213	32	-4.776054	32	-4.74719	32	-4.657471	32	-4.635892	32	-4.691077	32	-4.736951	32	-4.630864
32.2	-4.988038	32.2	-5.165898	32.2	-5.110808	32.2	-5.090024	32.2	-5.070426	32.2	-5.142243	32.2	-5.120729	32.2	-5.12869	32.2	-4.67716	32.2	-4.810072	32.2	-4.783085	32.2	-4.688523	32.2	-4.669127	32.2	-4.723919	32.2	-4.773958	32.2	-4.665919
32.4	-5.02404	32.4	-5.199541	32.4	-5.145195	32.4	-5.125178	32.4	-5.101975	32.4	-5.174062	32.4	-5.153644	32.4	-5.163472	32.4	-4.718338	32.4	-4.838862	32.4	-4.813316	32.4	-4.721146	32.4	-4.697383	32.4	-4.756153	32.4	-4.802812	32.4	-4.694557
32.6	-5.047782	32.6	-5.231512	32.6	-5.169124	32.6	-5.15235	32.6	-5.129842	32.6	-5.211455	32.6	-5.187219	32.6	-5.194032	32.6	-4.745571	32.6	-4.872853	32.6	-4.846085	32.6	-4.750515	32.6	-4.724809	32.6	-4.781242	32.6	-4.829657	32.6	-4.72385
32.8	-5.07413	32.8	-5.25772	32.8	-5.202213	32.8	-5.187609	32.8	-5.161266	32.8	-5.234023	32.8	-5.216514	32.8	-5.219475	32.8	-4.770135	32.8	-4.90147	32.8	-4.868116	32.8	-4.773954	32.8	-4.750649	32.8	-4.812335	32.8	-4.858515	32.8	-4.750021
33	-5.104477	33	-5.29467	33	-5.226589	33	-5.200633	33	-5.187751	33	-5.259682	33	-5.241714	33	-5.245931	33	-4.795292	33	-4.923101	33	-4.896538	33	-4.800471	33	-4.773058	33	-4.834418	33	-4.881385	33	-4.77327
33.2	-5.127768	33.2	-5.312695	33.2	-5.25143	33.2	-5.228725	33.2	-5.213999	33.2	-5.288466	33.2	-5.267046	33.2	-5.27477	33.2	-4.821089	33.2	-4.947356	33.2	-4.914971	33.2	-4.823828	33.2	-4.795766	33.2	-4.864823	33.2	-4.907237	33.2	-4.798868
33.4	-5.151403	33.4	-5.332824	33.4	-5.27424	33.4	-5.252854	33.4	-5.233399	33.4	-5.309084	33.4	-5.289636	33.4	-5.293378	33.4	-4.837399	33.4	-4.964042	33.4	-4.935607	33.4	-4.845446	33.4	-4.818594	33.4	-4.882752	33.4	-4.928207	33.4	-4.814776
33.6	-5.171821	33.6	-5.358514	33.6	-5.296082	33.6	-5.2738	33.6	-5.252608	33.6	-5.328721	33.6	-5.314366	33.6	-5.314867	33.6	-4.857277	33.6	-4.988697	33.6	-4.962788	33.6	-4.865659	33.6	-4.832797	33.6	-4.902852	33.6	-4.945025	33.6	-4.837786
33.8	-5.19329	33.8	-5.379793	33.8	-5.314539	33.8	-5.295451	33.8	-5.269285	33.8	-5.349511	33.8	-5.334484	33.8	-5.337017	33.8	-4.872681	33.8	-5.006292	33.8	-4.974198	33.8	-4.880765	33.8	-4.855879	33.8	-4.91872	33.8	-4.96982	33.8	-4.858357
34	-5.217044	34	-5.396567	34	-5.333117	34	-5.309572	34	-5.2932	34	-5.369103	34	-5.352211	34	-5.354192	34	-4.895449	34	-5.028829	34	-4.993467	34	-4.899641	34	-4.873262	34	-4.942312	34	-4.988192	34	-4.877935
34.2	-5.235109	34.2	-5.420234	34.2	-5.354115	34.2	-5.331172	34.2	-5.307564	34.2	-5.387797	34.2	-5.373195	34.2	-5.374904	34.2	-4.908658	34.2	-5.04351	34.2	-5.015695	34.2	-4.912649	34.2	-4.889223	34.2	-4.960837	34.2	-5.004383	34.2	-4.891297
34.4	-5.243499	34.4	-5.429858	34.4	-5.367303	34.4	-5.346904	34.4	-5.322163	34.4	-5.403048	34.4	-5.384928	34.4	-5.389482	34.4	-4.929808	34.4	-5.060472	34.4	-5.024588	34.4	-4.931472	34.4	-4.902537	34.4	-4.975682	34.4	-5.018595	34.4	-4.908536
34.6	-5.258574	34.6	-5.442871	34.6	-5.381916	34.6	-5.361078	34.6	-5.333885	34.6	-5.417243	34.6	-5.399792	34.6	-5.39711	34.6	-4.936485	34.6	-5.070552	34.6	-5.032977	34.6	-4.94278	34.6	-4.913603	34.6	-4.986531	34.6	-5.03084	34.6	-4.920381
34.8	-5.266455	34.8	-5.454731	34.8	-5.394266	34.8	-5.366211	34.8	-5.344341	34.8	-5.426123	34.8	-5.406359	34.8	-5.413156	34.8	-4.947782	34.8	-5.080192	34.8	-5.050407	34.8	-4.951433	34.8	-4.925782	34.8	-4.99267	34.8	-5.041281	34.8	-4.931202
35	-0.9444328	35	-0.9871504	35	-0.9561455	35	-0.9550915	35	-0.9273344	35	-0.9590418	35	-0.9621184	35	-0.9596888	35	-0.8145606	35	-0.8497195	35	-0.842841	35	-0.82138	35	-0.8353778	35	-0.8202085	35	-0.8230278	35	-0.8126468
35.2	-0.9347941	35.2	-0.9759966	35.2	-0.9342475	35.2	-0.9377064	35.2	-0.9078357	35.2	-0.938786	35.2	-0.9334651	35.2	-0.9510696	35.2	-0.8250822	35.2	-0.8680401	35.2	-0.849948	35.2	-0.8174616	35.2	-0.8406135	35.2	-0.8251907	35.2	-0.8324184	35.2	-0.8261375
35.4	-0.9087027	35.4	-0.9559286	35.4	-0.9034522	35.4	-0.9087347	35.4	-0.8788133	35.4	-0.9062638	35.4	-0.9022689	35.4	-0.920884	35.4	-0.8020914	35.4	-0.8496935	35.4	-0.8312896	35.4	-0.7997561	35.4	-0.8117961	35.4	-0.8045827	35.4	-0.8141807	35.4	-0.8031333
35.6	-0.8804524	35.6	-0.9235837	35.6	-0.876321	35.6	-0.8815318	35.6	-0.8513064	35.6	-0.880189	35.6	-0.8736215	35.6	-0.8927451	35.6	-0.7812678	35.6	-0.8223866	35.6	-0.8051248	35.6	-0.7714388	35.6	-0.7879918	35.6	-0.7775776	35.6	-0.791119	35.6	-0.7765806
35.8	-0.8500903	35.8	-0.8987299	35.8	-0.8492618	35.8	-0.8567342	35.8	-0.8303442	35.8	-0.8522887	35.8	-0.851971	35.8	-0.8675221	35.8	-0.7577615	35.8	-0.8009503	35.8	-0.7819205	35.8	-0.7493482	35.8	-0.7661326	35.8	-0.7576641	35.8	-0.7711325	35.8	-0.7532426
36	-0.835057	36	-0.8821171	36	-0.828321	36	-0.8292357	36	-0.8051036	36	-0.8312532	36	-0.8288996	36	-0.8482233	36	-0.7329842	36	-0.7796542	36	-0.7618752	36	-0.7348886	36	-0.7408391	36	-0.7416267	36	-0.7482308	36	-0.739172
36.2	-0.8123274	36.2	-0.8611975	36.2	-0.813332	36.2	-0.8133527	36.2	-0.7884747	36.2	-0.8146008	36.2	-0.8127035	36.2	-0.8287233	36.2	-0.7169271	36.2	-0.7604609	36.2	-0.7419912	36.2	-0.7157763	36.2	-0.7260669	36.2	-0.723449	36.2	-0.7307299	36.2	-0.7227802
36.4	-0.8008327	36.4	-0.8457463	36.4	-0.7959586	36.4	-0.7956797	36.4	-0.7721928	36.4	-0.7992517	36.4	-0.7991971	36.4	-0.8117722	36.4	-0.701458	36.4	-0.7461289	36.4	-0.7261339	36.4	-0.70053	36.4	-0.7083004	36.4	-0.7089099	36.4	-0.716126	36.4	-0.7028152
36.6	-0.7860143	36.6	-0.8252141	36.6	-0.7788032	36.6	-0.7856147	36.6	-0.7551122	36.6	-0.785375	36.6	-0.7824719	36.6	-0.794723	36.6	-0.686242	36.6	-0.7349577	36.6	-0.7135807	36.6	-0.6842981	36.6	-0.6953925	36.6	-0.6913472	36.6	-0.6999602	36.6	-0.6888837
36.81	-0.7651019	36.81	-0.8128278	36.81	-0.767538	36.81	-0.7709932	36.81	-0.7427863	36.81	-0.7709563	36.81	-0.7661992	36.81	-0.7809963	36.8	-0.674229	36.8	-0.7180402	36.8	-0.698293	36.8	-0.6704437	36.8	-0.6808624	36.8	-0.6755527	36.8	-0.6821623	36.8	-0.6763708
37	-0.7602217	37	-0.8020307	37	-0.7568558	37	-0.7558684	37	-0.7288215	37	-0.7602535	37	-0.7565001	37	-0.7720042	37	-0.6618721	37	-0.7058301	37	-0.6889901	37	-0.6582682	37	-0.6712794	37	-0.66653	37	-0.6743539	37	-0.6663182
37.2	-0.7444307	37.2	-0.7989624	37.2	-0.749732	37.2	-0.745392	37.2	-0.7196386	37.2	-0.7536689	37.2	-0.7516233	37.2	-0.759644	37.2	-0.6530007	37.2	-0.693588	37.2	-0.6775305	37.2	-0.6465305	37.2	-0.6553979	37.2	-0.6528938	37.2	-0.6680123	37.2	-0.6540673
37.4	-0.738223	37.4	-0.7804959	37.4	-0.7366065	37.4	-0.7360175	37.4	-0.712221	37.4	-0.7401677	37.4	-0.7393362	37.4	-0.7502286	37.4	-0.6390973	37.4	-0.6836716	37.4	-0.6674141	37.4	-0.6430222	37.4	-0.6454929	37.4	-0.646239	37.4	-0.6541355	37.4	-0.6458946
37.6	-0.7318177	37.6	-0.775846	37.6	-0.7278065	37.6	-0.7292169	37.6	-0.7082272	37.6	-0.7326292	37.6	-0.7249829	37.6	-0.7421339	37.6	-0.6347343	37.6	-0.678505	37.6	-0.6540551	37.6	-0.6316543	37.6	-0.6399739	37.6	-0.6355192	37.6	-0.6442609	37.6	-0.6350417
37.8	-0.7232411	37.8	-0.7614623	37.8	-0.7242731	37.8	-0.7168359	37.8	-0.6936216	37.8	-0.724591	37.8	-0.7204924	37.8	-0.734051	37.8	-0.6226861	37.8	-0.6700314	37.8	-0.648687	37.8	-0.6228608	37.8	-0.6339639	37.8	-0.6260086	37.8	-0.6353551	37.8	-0.63086
38	-0.7117379	38	-0.7577225	38	-0.7140127	38	-0.7075354	38	-0.6896305	38	-0.7152902	38	-0.7117273	38	-0.7243827	38	-0.6173015	38	-0.6587777	38	-0.6380857	38	-0.6190107	38	-0.6270872	38	-0.6190155	38	-0.6325941	38	-0.6239209
38.2	-0.705855	38.2	-0.7479547	38.2	-0.7030821	38.2	-0.7031603	38.2	-0.6802513	38.2	-0.7053033	38.2	-0.7067296	38.2	-0.719208	38.2	-0.6146169	38.2	-0.6499432	38.2	-0.6321571	38.2	-0.6077754	38.2	-0.6194297	38.2	-0.6101035	38.2	-0.6215469	38.2	-0.609125
38.4	-0.6976758	38.4	-0.7412806	38.4	-0.6993905	38.4	-0.6999332	38.4	-0.6766683	38.4	-0.6986403	38.4	-0.7001978	38.4	-0.708721	38.4	-0.6053698	38.4	-0.6461111	38.4	-0.6210131	38.4	-0.6001229	38.4	-0.6106129	38.4	-0.6015725	38.4	-0.6187883	38.4	-0.6039221
38.6	-0.6920324	38.6	-0.7301592	38.6	-0.6951835	38.6	-0.6880753	38.6	-0.6665037	38.6	-0.6988892	38.6	-0.692908	38.6	-0.6981866	38.6	-0.5973405	38.6	-0.6370189	38.6	-0.6203622	38.6	-0.5928102	38.6	-0.5983837	38.6	-0.5996956	38.6	-0.6035717	38.6	-0.5984054
38.8	-0.6834583	38.8	-0.7306671	38.8	-0.6859887	38.8	-0.6823277	38.8	-0.6607547	38.8	-0.6876482	38.8	-0.6888819	38.8	-0.6923515	38.8	-0.5873174	38.8	-0.6300822	38.8	-0.6100582	38.8	-0.589543	38.8	-0.5989226	38.8	-0.5906215	38.8	-0.5986782	38.8	-0.5885543
39	-0.6735953	39	-0.722427	39	-0.6762417	39	-0.6787239	39	-0.6534461	39	-0.6793761	39	-0.6783476	39	-0.6874148	39	-0.5806894	39	-0.6210384	39	-0.6049197	39	-0.586534	39	-0.5907763	39	-0.5847353	39	-0.5951262	39	-0.5878922
39.2	-0.6742104	39.2	-0.7104973	39.2	-0.6756541	39.2	-0.6703688	39.2	-0.6499635	39.2	-0.6761927	39.2	-0.6711457	39.2	-0.6823772	39.2	-0.5785235	39.2	-0.6216995	39.2	-0.5974748	39.2	-0.5745637	39.2	-0.5816119	39.2	-0.5817896	39.2	-0.5894443	39.2	-0.5781212
39.4	-0.6714424	39.4	-0.7090774	39.4	-0.6656069	39.4	-0.6647757	39.4	-0.6469772	39.4	-0.6695495	39.4	-0.6689832	39.4	-0.6772026	39.4	-0.5751984	39.4	-0.6148062	39.4	-0.5924329	39.4	-0.5697902	39.4	-0.580328	39.4	-0.5717894	39.4	-0.5803678	39.4	-0.5724682
39.6	-0.6654688	39.6	-0.706474	39.6	-0.6619592	39.6	-0.6609111	39.6	-0.6403215	39.6	-0.6674481	39.6	-0.6586243	39.6	-0.673	39.61	-0.569054	39.61	-0.6110779	39.61	-0.5872045	39.61	-0.5632275	39.61	-0.577399	39.61	-0.5701162	39.61	-0.5802568	39.61	-0.5732557
39.8	-0.6584129	39.8	-0.6997919	39.8	-0.6596859	39.8	-0.6546765	39.8	-0.6369842	39.8	-0.6625941	39.8	-0.6593513	39.8	-0.6688336	39.8	-0.5637458	39.8	-0.6068643	39.8	-0.5861825	39.8	-0.5635091	39.8	-0.56977	39.8	-0.566397	39.8	-0.5743615	39.8	-0.5685239
40	-4.67053	40	-4.83525	40	-4.761019	40	-4.735038	40	-4.684989	40	-4.768964	40	-4.772986	40	-4.76923	40	-4.37787	40	-4.526277	40	-4.417447	40	-4.336319	40	-4.342636	40	-4.377085	40	-4.41292	40	-4.335738
40.2	-4.866638	40.2	-5.037187	40.2	-4.963253	40.2	-4.935814	40.2	-4.891865	40.2	-4.973962	40.2	-4.972207	40.2	-4.977081	40.2	-4.555996	40.2	-4.703293	40.2	-4.633504	40.2	-4.540868	40.2	-4.528188	40.2	-4.580495	40.2	-4.618773	40.2	-4.531934
40.4	-4.961782	40.4	-5.146902	40.4	-5.059474	40.4	-5.030464	40.4	-4.999072	40.4	-5.074543	40.4	-5.072691	40.4	-5.076119	40.4	-4.644847	40.4	-4.793085	40.4	-4.727899	40.4	-4.629671	40.4	-4.613664	40.4	-4.670058	40.4	-4.714168	40.4	-4.621396
40.6	-5.025441	40.6	-5.211846	40.6	-5.122329	40.6	-5.090654	40.6	-5.062984	40.6	-5.145739	40.6	-5.135526	40.6	-5.138253	40.6	-4.700621	40.6	-4.849212	40.6	-4.792068	40.6	-4.695066	40.6	-4.670441	40.6	-4.728835	40.6	-4.773142	40.6	-4.679671
40.8	-5.067223	40.8	-5.258555	40.8	-5.170971	40.8	-5.145174	40.8	-5.110288	40.8	-5.194177	40.8	-5.187795	40.8	-5.190713	40.8	-4.74237	40.8	-4.892939	40.8	-4.835509	40.8	-4.732112	40.8	-4.717271	40.8	-4.769317	40.8	-4.824297	40.8	-4.725707
41	-5.102998	41	-5.296968	41	-5.21321	41	-5.180426	41	-5.140492	41	-5.233391	41	-5.22437	41	-5.220625	41	-4.778652	41	-4.923176	41	-4.870479	41	-4.773007	41	-4.751621	41	-4.810822	41	-4.85813	41	-4.758137
41.2	-5.132027	41.2	-5.319777	41.2	-5.238627	41.2	-5.21146	41.2	-5.176595	41.2	-5.256369	41.2	-5.255162	41.2	-5.255307	41.2	-4.803797	41.2	-4.949157	41.2	-4.902007	41.2	-4.798008	41.2	-4.778433	41.2	-4.844117	41.2	-4.887126	41.2	-4.787259
41.4	-5.157487	41.4	-5.351691	41.4	-5.264744	41.4	-5.235171	41.4	-5.202342	41.4	-5.290978	41.4	-5.283803	41.4	-5.280622	41.4	-4.829443	41.4	-4.974833	41.4	-4.926151	41.4	-4.827397	41.4	-4.803476	41.4	-4.866972	41.4	-4.915564	41.4	-4.816066
41.6	-5.184825	41.6	-5.371875	41.6	-5.295776	41.6	-5.260598	41.6	-5.22438	41.6	-5.31498	41.6	-5.306352	41.6	-5.303972	41.6	-4.856016	41.6	-5.004967	41.6	-4.947558	41.6	-4.850439	41.6	-4.822502	41.6	-4.888974	41.6	-4.940013	41.6	-4.83552
41.8	-5.202138	41.8	-5.393869	41.8	-5.308774	41.8	-5.280852	41.8	-5.245465	41.8	-5.337674	41.8	-5.323322	41.8	-5.32577	41.8	-4.868587	41.8	-5.020386	41.8	-4.967928	41.8	-4.867641	41.8	-4.846919	41.8	-4.911065	41.8	-4.957869	41.8	-4.855756
42	-5.217606	42	-5.413902	42	-5.332052	42	-5.297462	42	-5.259211	42	-5.353646	42	-5.342481	42	-5.340423	42	-4.886334	42	-5.039514	42	-4.987506	42	-4.886863	42	-4.860283	42	-4.926543	42	-4.970562	42	-4.870854
42.2	-5.23668	42.2	-5.427784	42.2	-5.34579	42.2	-5.313481	42.2	-5.277165	42.2	-5.371506	42.2	-5.361233	42.2	-5.362581	42.2	-4.905868	42.2	-5.054258	42.2	-4.998594	42.2	-4.904263	42.2	-4.877808	42.2	-4.942724	42.2	-4.988433	42.2	-4.88627
42.4	-5.249448	42.4	-5.444998	42.4	-5.35902	42.4	-5.331813	42.4	-5.291567	42.4	-5.386965	42.4	-5.375196	42.4	-5.374629	42.4	-4.924793	42.4	-5.071715	42.4	-5.019015	42.4	-4.914021	42.4	-4.889114	42.4	-4.959678	42.4	-5.005032	42.4	-4.901301
42.6	-5.258775	42.6	-5.460554	42.6	-5.377135	42.6	-5.34369	42.6	-5.305007	42.6	-5.402445	42.6	-5.394397	42.6	-5.39346	42.6	-4.933465	42.6	-5.082965	42.6	-5.024075	42.6	-4.931217	42.6	-4.903083	42.6	-4.972126	42.6	-5.019681	42.6	-4.917061
42.8	-5.277467	42.8	-5.473113	42.8	-5.386267	42.8	-5.354223	42.8	-5.321396	42.8	-5.417984	42.8	-5.406389	42.8	-5.401101	42.8	-4.944181	42.8	-5.092969	42.8	-5.041743	42.8	-4.94248	42.8	-4.918	42.8	-4.985713	42.8	-5.031822	42.8	-4.926407
43	-5.289938	43	-5.488559	43	-5.403275	43	-5.368454	43	-5.332532	43	-5.424755	43	-5.415533	43	-5.416203	43	-4.958016	43	-5.104046	43	-5.055272	43	-4.950623	43	-4.934379	43	-4.996791	43	-5.042147	43	-4.941253
43.2	-5.298007	43.2	-5.498176	43.2	-5.408635	43.2	-5.379367	43.2	-5.338678	43.2	-5.435161	43.2	-5.431953	43.2	-5.428301	43.2	-4.966563	43.2	-5.118808	43.2	-5.070064	43.2	-4.965112	43.2	-4.938788	43.2	-5.008012	43.2	-5.052163	43.2	-4.950242
43.4	-5.309472	43.4	-5.510006	43.4	-5.42113	43.4	-5.393018	43.4	-5.348803	43.4	-5.452214	43.4	-5.445897	43.4	-5.441712	43.4	-4.98208	43.4	-5.128812	43.4	-5.075184	43.4	-4.968396	43.4	-4.951797	43.4	-5.017169	43.4	-5.059638	43.4	-4.958831
43.6	-5.324154	43.6	-5.517435	43.6	-5.434569	43.6	-5.403921	43.6	-5.362238	43.6	-5.461637	43.6	-5.449584	43.6	-5.45293	43.6	-4.984381	43.6	-5.134396	43.6	-5.089673	43.6	-4.983214	43.6	-4.956704	43.6	-5.028519	43.6	-5.074861	43.6	-4.972268
43.8	-5.330408	43.8	-5.527488	43.8	-5.4453	43.8	-5.412252	43.8	-5.369573	43.8	-5.466603	43.8	-5.461488	43.8	-5.45547	43.8	-4.998708	43.8	-5.148178	43.8	-5.094661	43.8	-4.994045	43.8	-4.968781	43.8	-5.040073	43.8	-5.082544	43.8	-4.976837
44	-5.340243	44	-5.535541	44	-5.455239	44	-5.418477	44	-5.379539	44	-5.479045	44	-5.46769	44	-5.469346	44	-5.004073	44	-5.160155	44	-5.103766	44	-5.001348	44	-4.973418	44	-5.044641	44	-5.097372	44	-4.988914
44.2	-5.348109	44.2	-5.550465	44.2	-5.462789	44.2	-5.428969	44.2	-5.390254	44.2	-5.484615	44.2	-5.477479	44.2	-5.472981	44.2	-5.016418	44.2	-5.16284	44.2	-5.113993	44.2	-5.012313	44.2	-4.98262	44.2	-5.055766	44.2	-5.09921	44.2	-5.001688
44.4	-5.358587	44.4	-5.551362	44.4	-5.471756	44.4	-5.438483	44.4	-5.405485	44.4	-5.496305	44.4	-5.486613	44.4	-5.485685	44.4	-5.023955	44.4	-5.17165	44.4	-5.121876	44.4	-5.018447	44.4	-4.990964	44.4	-5.062236	44.4	-5.107847	44.4	-5.00395
44.6	-5.360145	44.6	-5.56155	44.6	-5.474179	44.6	-5.442017	44.6	-5.406278	44.6	-5.498498	44.6	-5.491338	44.6	-5.488917	44.6	-5.02663	44.6	-5.180274	44.6	-5.128223	44.6	-5.025692	44.6	-4.996254	44.6	-5.070705	44.6	-5.115367	44.6	-5.011827
44.8	-5.365494	44.8	-5.569375	44.8	-5.479816	44.8	-5.45172	44.8	-5.412915	44.8	-5.506875	44.8	-5.500811	44.8	-5.491187	44.8	-5.033637	44.8	-5.182995	44.8	-5.130957	44.8	-5.031301	44.8	-5.001992	44.8	-5.07427	44.8	-5.121303	44.8	-5.012371
45	-0.9180528	45	-0.9814692	45	-0.9382121	45	-0.9312243	45	-0.8808478	45	-0.9228184	45	-0.9352233	45	-0.9337245	45	-0.7981989	45	-0.8469148	45	-0.831267	45	-0.8048292	45	-0.815046	45	-0.7997599	45	-0.8002122	45	-0.7932346
45.2	-0.8996183	45.2	-0.9725441	45.2	-0.9199197	45.2	-0.9204196	45.2	-0.8602832	45.2	-0.9140646	45.2	-0.913356	45.2	-0.9146471	45.2	-0.805706	45.2	-0.8555899	45.2	-0.8384379	45.2	-0.7946565	45.2	-0.8161154	45.2	-0.7996576	45.2	-0.8025542	45.2	-0.7983721
45.4	-0.8749616	45.4	-0.9372197	45.4	-0.8955874	45.4	-0.8940886	45.4	-0.8313649	45.4	-0.88691	45.4	-0.8825319	45.4	-0.8896227	45.4	-0.780512	45.4	-0.8402876	45.4	-0.8198501	45.4	-0.7694424	45.4	-0.7934985	45.4	-0.7787123	45.4	-0.7889677	45.4	-0.7783741
45.6	-0.8436755	45.6	-0.9165409	45.6	-0.8661407	45.6	-0.8609206	45.6	-0.8044342	45.6	-0.8591647	45.6	-0.858475	45.6	-0.8645625	45.6	-0.7598964	45.6	-0.8139182	45.6	-0.790381	45.6	-0.748867	45.6	-0.7734033	45.6	-0.7593568	45.6	-0.7584884	45.6	-0.7577154
45.8	-0.8213806	45.8	-0.889016	45.8	-0.8364738	45.8	-0.8392239	45.8	-0.7801765	45.8	-0.8356746	45.8	-0.8304725	45.8	-0.8396409	45.8	-0.7351006	45.8	-0.791226	45.8	-0.7688489	45.8	-0.7279018	45.8	-0.7448605	45.8	-0.7339746	45.8	-0.7510063	45.8	-0.735584
46	-0.8040267	46	-0.8713481	46	-0.8215668	46	-0.8165905	46	-0.7620706	46	-0.8206658	46	-0.8073565	46	-0.8187777	46	-0.7150555	46	-0.7746771	46	-0.7518158	46	-0.709125	46	-0.7323034	46	-0.7174632	46	-0.7228624	46	-0.7173854
46.2	-0.7909856	46.2	-0.8566542	46.2	-0.8054571	46.2	-0.8031079	46.2	-0.7514554	46.2	-0.7966025	46.2	-0.7930475	46.2	-0.802654	46.2	-0.7016075	46.2	-0.7586884	46.2	-0.7330645	46.2	-0.6932867	46.2	-0.7082477	46.2	-0.697065	46.2	-0.708963	46.2	-0.7002997
46.4	-0.7712323	46.4	-0.8365303	46.4	-0.7907311	46.4	-0.7827097	46.4	-0.7367216	46.4	-0.7824163	46.4	-0.7785335	46.4	-0.7883502	46.4	-0.6821086	46.4	-0.740242	46.4	-0.7180895	46.4	-0.6827885	46.4	-0.6918303	46.4	-0.6858305	46.4	-0.6969295	46.4	-0.6868501
46.6	-0.7589976	46.6	-0.8240218	46.6	-0.7724179	46.6	-0.7695836	46.6	-0.7157725	46.6	-0.7708995	46.6	-0.7651966	46.6	-0.7687554	46.6	-0.6716928	46.6	-0.7238427	46.6	-0.6983668	46.6	-0.6638467	46.6	-0.6797384	46.6	-0.6689305	46.6	-0.678794	46.6	-0.6702594
46.8	-0.7518423	46.8	-0.8091017	46.8	-0.7605757	46.8	-0.7557149	46.8	-0.7042731	46.8	-0.7538191	46.8	-0.7523075	46.8	-0.7618408	46.8	-0.6607738	46.8	-0.7142794	46.8	-0.6894535	46.8	-0.6536282	46.8	-0.6643318	46.8	-0.6605321	46.8	-0.6666489	46.8	-0.6548643
47	-0.742642	47	-0.7969779	47	-0.748051	47	-0.7438102	47	-0.6957915	47	-0.7433531	47	-0.7396435	47	-0.746523	47	-0.6463447	47	-0.7014089	47	-0.6786162	47	-0.6419733	47	-0.6588339	47	-0.6434826	47	-0.6537259	47	-0.6505385
47.2	-0.7262134	47.2	-0.7835732	47.2	-0.7404583	47.2	-0.735252	47.2	-0.6851041	47.2	-0.732276	47.2	-0.732061	47.2	-0.738791	47.2	-0.6359703	47.2	-0.6898481	47.2	-0.6663588	47.2	-0.6380116	47.2	-0.6444594	47.2	-0.6384212	47.2	-0.6474491	47.2	-0.6375202
47.4	-0.7168643	47.4	-0.7793514	47.4	-0.7323907	47.4	-0.7246049	47.4	-0.6746848	47.4	-0.7239059	47.4	-0.7212343	47.4	-0.7268912	47.4	-0.63053	47.4	-0.683994	47.4	-0.6591069	47.4	-0.6205447	47.4	-0.6381058	47.4	-0.6266925	47.4	-0.6359572	47.4	-0.6303341
47.6	-0.7084451	47.6	-0.7702265	47.6	-0.7162678	47.6	-0.7129147	47.6	-0.6659538	47.6	-0.7143022	47.6	-0.7118427	47.6	-0.7155716	47.6	-0.6190459	47.6	-0.6748579	47.6	-0.6504601	47.6	-0.6144897	47.6	-0.6285455	47.6	-0.6166129	47.6	-0.6262705	47.6	-0.6236318
47.8	-0.705087	47.8	-0.7641979	47.8	-0.7123876	47.8	-0.7092199	47.8	-0.660877	47.8	-0.7057058	47.8	-0.7037686	47.8	-0.7098217	47.8	-0.6090428	47.8	-0.6640949	47.8	-0.6459956	47.8	-0.6055894	47.8	-0.6222026	47.8	-0.6112136	47.8	-0.6200925	47.8	-0.6089619
48	-0.6916622	48	-0.7586556	48	-0.7082788	48	-0.6978675	48	-0.6536707	48	-0.6953872	48	-0.6981678	48	-0.7054636	48	-0.6023532	48	-0.6609374	48	-0.6339017	48	-0.5987644	48	-0.6153554	48	-0.6008503	48	-0.6064484	48	-0.602119
48.2	-0.686129	48.2	-0.7446806	48.2	-0.6951547	48.2	-0.6904818	48.2	-0.6447126	48.2	-0.6918316	48.2	-0.68758	48.2	-0.6943252	48.2	-0.5982453	48.2	-0.6523982	48.2	-0.6251327	48.2	-0.5928288	48.2	-0.6078502	48.2	-0.591493	48.2	-0.6039628	48.2	-0.5961298
48.4	-0.6832875	48.4	-0.738108	48.4	-0.6902359	48.4	-0.6806152	48.4	-0.6354541	48.4	-0.6804638	48.4	-0.6837744	48.4	-0.6872651	48.4	-0.5836802	48.4	-0.642464	48.4	-0.6164185	48.4	-0.585947	48.4	-0.5964912	48.4	-0.5844799	48.4	-0.599077	48.4	-0.5873437
48.6	-0.6764474	48.6	-0.7355027	48.6	-0.6819217	48.6	-0.6776682	48.6	-0.6326435	48.6	-0.6716879	48.6	-0.6755111	48.6	-0.6820865	48.6	-0.5797382	48.6	-0.6371522	48.6	-0.6097564	48.6	-0.5772202	48.6	-0.5928019	48.6	-0.5776642	48.6	-0.5910807	48.6	-0.5818352
48.8	-0.6691145	48.8	-0.7323101	48.8	-0.6749592	48.8	-0.6747416	48.8	-0.633358	48.8	-0.6688497	48.8	-0.6733589	48.8	-0.6771495	48.8	-0.5767347	48.8	-0.629964	48.8	-0.6048045	48.8	-0.5730029	48.8	-0.5878422	48.8	-0.5780554	48.8	-0.5866264	48.8	-0.574961
49	-0.6645197	49	-0.7273332	49	-0.6707403	49	-0.6662897	49	-0.6225319	49	-0.6663951	49	-0.661611	49	-0.6721205	49	-0.5705225	49	-0.625302	49	-0.5998335	49	-0.5670197	49	-0.5780915	49	-0.5676035	49	-0.5754023	49	-0.5716385
49.2	-0.6565011	49.2	-0.7201779	49.2	-0.6627482	49.2	-0.6569992	49.2	-0.6164602	49.2	-0.6570446	49.2	-0.661388	49.2	-0.6656508	49.2	-0.5640488	49.2	-0.6193243	49.2	-0.5930575	49.2	-0.562358	49.2	-0.5739141	49.2	-0.5642228	49.2	-0.5741816	49.2	-0.5686272
49.4	-0.6555122	49.4	-0.7124588	49.4	-0.6656674	49.4	-0.6546053	49.4	-0.6116272	49.4	-0.6516854	49.4	-0.6554726	49.4	-0.6566388	49.4	-0.5663553	49.4	-0.6164397	49.4	-0.5885162	49.4	-0.556901	49.4	-0.5699303	49.4	-0.5572637	49.4	-0.5689718	49.4	-0.5597911
49.6	-0.6493552	49.6	-0.7076886	49.6	-0.6575273	49.6	-0.6483333	49.6	-0.6096349	49.6	-0.6514458	49.6	-0.6505788	49.6	-0.6561188	49.6	-0.5573162	49.6	-0.6099269	49.6	-0.5854106	49.6	-0.5554917	49.6	-0.5651588	49.6	-0.5560092	49.6	-0.5672721	49.6	-0.5611271
49.8	-0.6452527	49.8	-0.707675	49.8	-0.6512948	49.8	-0.6454594	49.8	-0.6055964	49.8	-0.6446657	49.8	-0.6493267	49.8	-0.6520978	49.8	-0.5525343	49.8	-0.605893	49.8	-0.5825077	49.8	-0.5487722	49.8	-0.5633034	49.8	-0.5484017	49.8	-0.5620641	49.8	-0.5563404
50	-4.68485	50	-4.811684	50	-4.75141	50	-4.716728	50	-4.670352	50	-4.746505	50	-4.755317	50	-4.743732	50	-4.393301	50	-4.483521	50	-4.49611	50	-4.38442	50	-4.386137	50	-4.380218	50	-4.431061	50	-4.360514
50.2	-4.874605	50.2	-5.053105	50.2	-4.968322	50.2	-4.933095	50.2	-4.881345	50.2	-4.978718	50.2	-4.979861	50.2	-4.976375	50.2	-4.577382	50.2	-4.70433	50.2	-4.673282	50.2	-4.560838	50.2	-4.550023	50.2	-4.585791	50.2	-4.634229	50.2	-4.551299
50.4	-4.970712	50.4	-5.16763	50.4	-5.070308	50.4	-5.031492	50.4	-4.979209	50.4	-5.086404	50.4	-5.081033	50.4	-5.080631	50.4	-4.654218	50.4	-4.796823	50.4	-4.759892	50.4	-4.645721	50.4	-4.637016	50.4	-4.679352	50.4	-4.720791	50.4	-4.637818
50.6	-5.033629	50.6	-5.238186	50.6	-5.130556	50.6	-5.103131	50.6	-5.046706	50.6	-5.143802	50.6	-5.141011	50.6	-5.1437	50.6	-4.705507	50.6	-4.854253	50.6	-4.810965	50.6	-4.69839	50.6	-4.683223	50.6	-4.73142	50.6	-4.77886	50.6	-4.688265
50.8	-5.072974	50.8	-5.277781	50.8	-5.172884	50.8	-5.140223	50.8	-5.089455	50.8	-5.189935	50.8	-5.191998	50.8	-5.190471	50.8	-4.752752	50.8	-4.89205	50.8	-4.847109	50.8	-4.74062	50.8	-4.718206	50.8	-4.774305	50.8	-4.823889	50.8	-4.732961
51	-5.106611	51	-5.307406	51	-5.209124	51	-5.170452	51	-5.119677	51	-5.223103	51	-5.221786	51	-5.221507	51	-4.779725	51	-4.928585	51	-4.882387	51	-4.770431	51	-4.757538	51	-4.804068	51	-4.855996	51	-4.769835
51.2	-5.135556	51.2	-5.336924	51.2	-5.237633	51.2	-5.202686	51.2	-5.144732	51.2	-5.258118	51.2	-5.25131	51.2	-5.247939	51.2	-4.807199	51.2	-4.960192	51.2	-4.906903	51.2	-4.798861	51.2	-4.782796	51.2	-4.830073	51.2	-4.883448	51.2	-4.786214
51.4	-5.153032	51.4	-5.363876	51.4	-5.259717	51.4	-5.226778	51.4	-5.169424	51.4	-5.278457	51.4	-5.275599	51.4	-5.274871	51.4	-4.833579	51.4	-4.985764	51.4	-4.931887	51.4	-4.82404	51.4	-4.802575	51.4	-4.858778	51.4	-4.912489	51.4	-4.812835
51.6	-5.176626	51.6	-5.381809	51.6	-5.282165	51.6	-5.246696	51.6	-5.189085	51.6	-5.294139	51.6	-5.297582	51.6	-5.295437	51.6	-4.850823	51.6	-5.008184	51.6	-4.949398	51.6	-4.844653	51.6	-4.820881	51.6	-4.875783	51.6	-4.929329	51.6	-4.833905
51.8	-5.192575	51.8	-5.405043	51.8	-5.303215	51.8	-5.264737	51.8	-5.208135	51.8	-5.316449	51.8	-5.317768	51.8	-5.313202	51.8	-4.868388	51.8	-5.017504	51.8	-4.966285	51.8	-4.855579	51.8	-4.837712	51.8	-4.896563	51.8	-4.946349	51.8	-4.846061
52	-5.209684	52	-5.418877	52	-5.314351	52	-5.288961	52	-5.227715	52	-5.33318	52	-5.330173	52	-5.330577	52	-4.880504	52	-5.035503	52	-4.984684	52	-4.872059	52	-4.851177	52	-4.912156	52	-4.962026	52	-4.867551
52.2	-5.227051	52.2	-5.433632	52.2	-5.334367	52.2	-5.295394	52.2	-5.240509	52.2	-5.348619	52.2	-5.345814	52.2	-5.338476	52.2	-4.898586	52.2	-5.051325	52.2	-4.9969	52.2	-4.883943	52.2	-4.86087	52.2	-4.926644	52.2	-4.97577	52.2	-4.880998
52.4	-5.241714	52.4	-5.446062	52.4	-5.345351	52.4	-5.310844	52.4	-5.251647	52.4	-5.36484	52.4	-5.358689	52.4	-5.359069	52.4	-4.90755	52.4	-5.064469	52.4	-5.008096	52.4	-4.897312	52.4	-4.874777	52.4	-4.936707	52.4	-4.991659	52.4	-4.889247
52.6	-5.252285	52.6	-5.463086	52.6	-5.354592	52.6	-5.319178	52.6	-5.266759	52.6	-5.37139	52.6	-5.377984	52.6	-5.370871	52.6	-4.919619	52.6	-5.080362	52.6	-5.018553	52.6	-4.909956	52.6	-4.891351	52.6	-4.953647	52.6	-4.999841	52.6	-4.899687
52.8	-5.267645	52.8	-5.472046	52.8	-5.365232	52.8	-5.332996	52.8	-5.27954	52.8	-5.383809	52.8	-5.388067	52.8	-5.376983	52.8	-4.927846	52.8	-5.09106	52.8	-5.033803	52.8	-4.92458	52.8	-4.899092	52.8	-4.961671	52.8	-5.011668	52.8	-4.918002
53	-5.272819	53	-5.482719	53	-5.374449	53	-5.343427	53	-5.287049	53	-5.400195	53	-5.394594	53	-5.389798	53	-4.937526	53	-5.100261	53	-5.041475	53	-4.930979	53	-4.909025	53	-4.970286	53	-5.019499	53	-4.922478
53.2	-5.280588	53.2	-5.491372	53.2	-5.390238	53.2	-5.349453	53.2	-5.293533	53.2	-5.406525	53.2	-5.404726	53.2	-5.398506	53.2	-4.94746	53.2	-5.10382	53.2	-5.052488	53.2	-4.939062	53.2	-4.916864	53.2	-4.980435	53.2	-5.030152	53.2	-4.931405
53.4	-5.292909	53.4	-5.499835	53.4	-5.394056	53.4	-5.363346	53.4	-5.305604	53.4	-5.412907	53.4	-5.414882	53.4	-5.409078	53.4	-4.954886	53.4	-5.113132	53.4	-5.061827	53.4	-4.948234	53.4	-4.929742	53.4	-4.985645	53.4	-5.036012	53.4	-4.938753
53.6	-5.299201	53.6	-5.511739	53.6	-5.408287	53.6	-5.368973	53.6	-5.309876	53.6	-5.425498	53.6	-5.416834	53.6	-5.415715	53.6	-4.96909	53.6	-5.125879	53.6	-5.071323	53.6	-4.960437	53.6	-4.934783	53.6	-4.996851	53.6	-5.049436	53.6	-4.948164
53.81	-5.308193	53.81	-5.520619	53.81	-5.416595	53.81	-5.382103	53.81	-5.324495	53.81	-5.432386	53.81	-5.434369	53.81	-5.427958	53.8	-4.970931	53.8	-5.130658	53.8	-5.076422	53.8	-4.964349	53.8	-4.942016	53.8	-5.003942	53.8	-5.05523	53.8	-4.954127
54	-5.313437	54	-5.525163	54	-5.422594	54	-5.385252	54	-5.333625	54	-5.443575	54	-5.438237	54	-5.432821	54	-4.975294	54	-5.144501	54	-5.083354	54	-4.970888	54	-4.951334	54	-5.01053	54	-5.061962	54	-4.965281
54.2	-5.323268	54.2	-5.534548	54.2	-5.427733	54.2	-5.390683	54.2	-5.335855	54.2	-5.446567	54.2	-5.446466	54.2	-5.440369	54.2	-4.993415	54.2	-5.148188	54.2	-5.088038	54.2	-4.978715	54.2	-4.958432	54.2	-5.018436	54.2	-5.067998	54.2	-4.972836
54.4	-5.329356	54.4	-5.54233	54.4	-5.438098	54.4	-5.402216	54.4	-5.346838	54.4	-5.456735	54.4	-5.453415	54.4	-5.446214	54.4	-4.998264	54.4	-5.151524	54.4	-5.097026	54.4	-4.987982	54.4	-4.963357	54.4	-5.02341	54.4	-5.074541	54.4	-4.976556
54.6	-5.331223	54.6	-5.542888	54.6	-5.441795	54.6	-5.404897	54.6	-5.35024	54.6	-5.460029	54.6	-5.459383	54.6	-5.455698	54.6	-5.001034	54.6	-5.154398	54.6	-5.100737	54.6	-4.990559	54.6	-4.96699	54.6	-5.031093	54.6	-5.080295	54.6	-4.982943
54.8	-5.341181	54.8	-5.550551	54.8	-5.445831	54.8	-5.415038	54.8	-5.359536	54.8	-5.466269	54.8	-5.463209	54.8	-5.457228	54.8	-5.00705	54.8	-5.159295	54.8	-5.106199	54.8	-4.99157	54.8	-4.972847	54.8	-5.03364	54.8	-5.084363	54.8	-4.987879
55	-0.8633434	55	-0.9393224	55	-0.8752647	55	-0.8707172	55	-0.8008691	55	-0.8654128	55	-0.8668956	55	-0.8676489	55	-0.7466767	55	-0.8117563	55	-0.7873554	55	-0.7147036	55	-0.7677541	55	-0.7430745	55	-0.7538536	55	-0.7394681
55.2	-0.8430982	55.2	-0.9226378	55.2	-0.8603413	55.2	-0.8426345	55.2	-0.7901952	55.2	-0.8497543	55.2	-0.8497981	55.2	-0.8548844	55.2	-0.7438618	55.2	-0.8083175	55.2	-0.7791064	55.2	-0.7347301	55.2	-0.7670903	55.2	-0.7375313	55.2	-0.7453753	55.2	-0.7377644
55.4	-0.8200597	55.4	-0.8948974	55.4	-0.83582	55.4	-0.8153763	55.4	-0.7591982	55.4	-0.8206963	55.4	-0.8255141	55.4	-0.8317531	55.4	-0.7219294	55.4	-0.788185	55.4	-0.7657814	55.4	-0.7204306	55.4	-0.7397805	55.4	-0.7148821	55.4	-0.7242589	55.4	-0.7166133
55.6	-0.7965414	55.6	-0.8719292	55.6	-0.809012	55.6	-0.7917291	55.6	-0.7375682	55.6	-0.7951232	55.6	-0.801521	55.6	-0.7990179	55.6	-0.695251	55.6	-0.7634159	55.6	-0.7413409	55.6	-0.7033675	55.6	-0.7158836	55.6	-0.6916753	55.6	-0.7074845	55.6	-0.6966319
55.8	-0.7706343	55.8	-0.8498318	55.8	-0.7861016	55.8	-0.7663147	55.8	-0.7127081	55.8	-0.7707215	55.8	-0.7727802	55.8	-0.7774869	55.8	-0.6743768	55.8	-0.7457774	55.8	-0.7206735	55.8	-0.6840595	55.8	-0.693632	55.8	-0.6711003	55.8	-0.678838	55.8	-0.6755107
56	-0.7547866	56	-0.8282461	56	-0.7682633	56	-0.7451869	56	-0.6929724	56	-0.7554752	56	-0.755003	56	-0.7627044	56	-0.6590661	56	-0.724528	56	-0.698607	56	-0.6610016	56	-0.6744609	56	-0.6483329	56	-0.6625762	56	-0.6547002
56.2	-0.7370076	56.2	-0.81485	56.2	-0.7513276	56.2	-0.7246178	56.2	-0.6769241	56.2	-0.7326499	56.2	-0.7396745	56.2	-0.7432324	56.2	-0.6384327	56.2	-0.7109131	56.2	-0.6828502	56.2	-0.6492673	56.2	-0.6547675	56.2	-0.6370248	56.2	-0.6446823	56.2	-0.640236
56.4	-0.7204808	56.4	-0.8012252	56.4	-0.7344529	56.4	-0.7129448	56.4	-0.6622556	56.4	-0.7182079	56.4	-0.7259542	56.4	-0.7307403	56.4	-0.6260878	56.4	-0.6970839	56.4	-0.6694467	56.4	-0.6320992	56.4	-0.6411884	56.4	-0.6237873	56.4	-0.6290057	56.4	-0.6263345
56.6	-0.7121217	56.6	-0.7882569	56.6	-0.7238762	56.6	-0.7007062	56.6	-0.6495214	56.6	-0.7041018	56.6	-0.7082283	56.6	-0.7115873	56.6	-0.6153646	56.6	-0.6799315	56.6	-0.6500335	56.6	-0.6186763	56.6	-0.6245503	56.6	-0.6092977	56.6	-0.6165071	56.6	-0.6080404
56.8	-0.6959397	56.8	-0.7766929	56.8	-0.7071529	56.8	-0.6931111	56.8	-0.6374531	56.8	-0.694425	56.8	-0.6989726	56.8	-0.6986142	56.8	-0.6047423	56.8	-0.6706691	56.8	-0.6436832	56.8	-0.604018	56.8	-0.6230071	56.8	-0.6023852	56.8	-0.6038773	56.8	-0.5995783
57	-0.6830941	57	-0.7653193	57	-0.6941678	57	-0.6793194	57	-0.6306231	57	-0.6811557	57	-0.688678	57	-0.6883488	57	-0.5923908	57	-0.6556077	57	-0.627487	57	-0.5985677	57	-0.606273	57	-0.5885146	57	-0.5965585	57	-0.5885021
57.2	-0.677469	57.2	-0.7535226	57.2	-0.6890559	57.2	-0.672792	57.2	-0.6189637	57.2	-0.6698575	57.2	-0.6742911	57.2	-0.6735344	57.2	-0.5830532	57.2	-0.6496004	57.2	-0.6188704	57.2	-0.5871611	57.2	-0.5967715	57.2	-0.5770209	57.2	-0.5865495	57.2	-0.5790367
57.4	-0.6718114	57.4	-0.7415324	57.4	-0.6717117	57.4	-0.6588661	57.4	-0.6098137	57.4	-0.6672025	57.4	-0.6670109	57.4	-0.6712055	57.4	-0.5722549	57.4	-0.6382627	57.4	-0.6100503	57.4	-0.5784008	57.4	-0.5844142	57.4	-0.5678962	57.4	-0.5769431	57.4	-0.5678179
57.6	-0.6547548	57.6	-0.7352982	57.6	-0.663774	57.6	-0.6491363	57.6	-0.6016673	57.6	-0.6536487	57.6	-0.6558744	57.6	-0.6597208	57.6	-0.5650688	57.6	-0.6296296	57.6	-0.6039296	57.6	-0.5673943	57.6	-0.5781842	57.6	-0.553364	57.6	-0.5723603	57.6	-0.5584588
57.8	-0.6519659	57.8	-0.7268426	57.8	-0.6596586	57.8	-0.6426688	57.8	-0.5921221	57.8	-0.641247	57.8	-0.6448238	57.8	-0.6537731	57.8	-0.5599486	57.8	-0.6219372	57.8	-0.5918859	57.8	-0.5554162	57.8	-0.5762566	57.8	-0.5509428	57.8	-0.55846	57.8	-0.5513585
58.01	-0.6406152	58.01	-0.7182531	58.01	-0.6549907	58.01	-0.6331717	58.01	-0.5846454	58.01	-0.6328536	58.01	-0.6378218	58.01	-0.6460887	58	-0.5466739	58	-0.6130213	58	-0.586957	58	-0.5498673	58	-0.562767	58	-0.5439186	58	-0.5535402	58	-0.5471588
58.2	-0.6341974	58.2	-0.710756	58.2	-0.6428494	58.2	-0.6311375	58.2	-0.5812947	58.2	-0.6308339	58.2	-0.6364609	58.2	-0.638366	58.2	-0.5408474	58.2	-0.6100647	58.2	-0.5812297	58.2	-0.543339	58.2	-0.5568367	58.2	-0.5358427	58.2	-0.5478168	58.2	-0.5456527
58.4	-0.6287567	58.4	-0.701844	58.4	-0.6380988	58.4	-0.6204256	58.4	-0.5709523	58.4	-0.6204908	58.4	-0.6279401	58.4	-0.6357281	58.4	-0.532977	58.4	-0.5993041	58.4	-0.5731317	58.4	-0.5394694	58.4	-0.5472768	58.4	-0.528748	58.4	-0.5418526	58.4	-0.5348442
58.6	-0.6197987	58.6	-0.6969547	58.6	-0.6338175	58.6	-0.6134711	58.6	-0.5674773	58.6	-0.6167386	58.6	-0.6196057	58.6	-0.6288248	58.6	-0.5363349	58.6	-0.5963803	58.6	-0.5673782	58.6	-0.5294659	58.6	-0.5445193	58.6	-0.520795	58.6	-0.5342542	58.6	-0.5308546
58.8	-0.6167217	58.8	-0.6939051	58.8	-0.6235258	58.8	-0.6100052	58.8	-0.5613206	58.8	-0.6095507	58.8	-0.61862	58.8	-0.6223009	58.8	-0.523405	58.8	-0.593097	58.8	-0.5610764	58.8	-0.526124	58.8	-0.5392082	58.8	-0.5158214	58.8	-0.5244085	58.8	-0.5238925
59	-0.6142979	59	-0.6859983	59	-0.620728	59	-0.6045238	59	-0.5547414	59	-0.5999833	59	-0.610976	59	-0.6153958	59	-0.5163446	59	-0.5856448	59	-0.5564852	59	-0.5237243	59	-0.531477	59	-0.5105201	59	-0.5216619	59	-0.5206192
59.2	-0.6052989	59.2	-0.6787725	59.2	-0.6152494	59.2	-0.5997255	59.2	-0.5453395	59.2	-0.5958805	59.2	-0.6064059	59.2	-0.6058236	59.2	-0.5116829	59.2	-0.5821882	59.2	-0.5497877	59.2	-0.5133675	59.2	-0.5260759	59.2	-0.5063899	59.2	-0.5179167	59.2	-0.5103036
59.4	-0.5996014	59.4	-0.6724243	59.4	-0.609304	59.4	-0.5930889	59.4	-0.5444932	59.4	-0.5963289	59.4	-0.5979012	59.4	-0.6074999	59.4	-0.5105032	59.4	-0.5752143	59.4	-0.5488734	59.4	-0.5100031	59.4	-0.5226271	59.4	-0.5019619	59.4	-0.5171826	59.4	-0.5098945
59.6	-0.5986593	59.6	-0.6742528	59.6	-0.6064188	59.6	-0.5899582	59.6	-0.5429265	59.6	-0.5903478	59.6	-0.5942635	59.6	-0.6016113	59.6	-0.5062557	59.6	-0.570502	59.6	-0.5381896	59.6	-0.5021637	59.6	-0.5216091	59.6	-0.4952201	59.6	-0.5062467	59.6	-0.5037768
59.8	-0.5946668	59.8	-0.6684476	59.8	-0.6044829	59.8	-0.5875566	59.8	-0.5408217	59.8	-0.5883611	59.8	-0.5944279	59.8	-0.5971036	59.8	-0.503956	59.8	-0.566254	59.8	-0.5378772	59.8	-0.5050643	59.8	-0.5130025	59.8	-0.4920619	59.8	-0.5083819	59.8	-0.5009667
60	-0.5019473	60	-0.5748885	60	-0.5066099	60	-0.4929253	60	-0.4477054	60	-0.4917931	60	-0.4949096	60	-0.5047904	60	-0.4287237	60	-0.493163	60	-0.4645736	60	-0.4267232	60	-0.4410442	60	-0.4191182	60	-0.4283255	60	-0.4307068
60.2	-0.502813	60.2	-0.5683317	60.2	-0.505955	60.2	-0.4883617	60.2	-0.448361	60.2	-0.4888626	60.2	-0.4852134	60.2	-0.4999687	60.2	-0.4307856	60.2	-0.4914376	60.2	-0.4616452	60.2	-0.4278275	60.2	-0.4413669	60.2	-0.4154031	60.2	-0.4248691	60.2	-0.4296249
60.4	-0.4968	60.4	-0.5660332	60.4	-0.5011787	60.4	-0.4865656	60.4	-0.4458935	60.4	-0.486827	60.4	-0.4883046	60.4	-0.4997596	60.4	-0.4261814	60.4	-0.4908806	60.4	-0.4563043	60.4	-0.4237186	60.4	-0.4422848	60.4	-0.4175954	60.4	-0.4187178	60.4	-0.4263476
60.6	-0.4981945	60.6	-0.5677238	60.6	-0.4971379	60.6	-0.4900278	60.6	-0.4425013	60.6	-0.4830735	60.6	-0.4837209	60.6	-0.4973417	60.6	-0.4241393	60.6	-0.4874346	60.6	-0.4545322	60.6	-0.4248183	60.6	-0.4388222	60.6	-0.4123698	60.6	-0.4226722	60.6	-0.4279709
60.8	-0.4951397	60.8	-0.5632709	60.8	-0.4946176	60.8	-0.4845359	60.8	-0.4441349	60.8	-0.4830433	60.8	-0.4848402	60.8	-0.498246	60.8	-0.4206858	60.8	-0.4852301	60.8	-0.455493	60.8	-0.4216167	60.8	-0.4423793	60.8	-0.4130997	60.8	-0.4196391	60.8	-0.4234506
61.01	-0.4908465	61.01	-0.5602641	61.01	-0.4924314	61.01	-0.4774965	61.01	-0.4447477	61.01	-0.4792594	61.01	-0.4864885	61.01	-0.4913381	61	-0.4199903	61	-0.4807883	61	-0.4535432	61	-0.4163097	61	-0.4341954	61	-0.4109277	61	-0.4151099	61	-0.4244603
61.2	-0.4915221	61.2	-0.5605333	61.2	-0.4930024	61.2	-0.4754256	61.2	-0.4398382	61.2	-0.4739182	61.2	-0.4800814	61.2	-0.4894436	61.2	-0.4211134	61.2	-0.4818927	61.2	-0.454498	61.2	-0.4177458	61.2	-0.4309285	61.2	-0.4075665	61.2	-0.4151449	61.2	-0.4233212
61.4	-0.4887751	61.4	-0.5586273	61.4	-0.4942676	61.4	-0.4759873	61.4	-0.4349028	61.4	-0.4727935	61.4	-0.4800879	61.4	-0.4880954	61.4	-0.417304	61.4	-0.4776397	61.4	-0.4492623	61.4	-0.4146704	61.4	-0.428167	61.4	-0.4056519	61.4	-0.4146824	61.4	-0.4148807
61.6	-0.486666	61.6	-0.558939	61.6	-0.4905884	61.6	-0.4761798	61.6	-0.4331998	61.6	-0.4732358	61.6	-0.4788286	61.6	-0.4861162	61.6	-0.4208337	61.6	-0.4778204	61.6	-0.4495772	61.6	-0.4124461	61.6	-0.4257674	61.6	-0.4060453	61.6	-0.4129288	61.6	-0.4149445
61.8	-0.482438	61.8	-0.5562731	61.8	-0.4895732	61.8	-0.4764272	61.8	-0.4304231	61.8	-0.469698	61.8	-0.4745525	61.8	-0.4871935	61.8	-0.4153251	61.8	-0.4772034	61.8	-0.4451042	61.8	-0.4098668	61.8	-0.4264648	61.8	-0.4054876	61.8	-0.4100301	61.8	-0.4154842
62	-0.4831897	62	-0.5552598	62	-0.4844393	62	-0.4716269	62	-0.4284821	62	-0.4676341	62	-0.4730977	62	-0.4844485	62	-0.4154217	62	-0.4763905	62	-0.4459488	62	-0.4100795	62	-0.4236706	62	-0.4038173	62	-0.411959	62	-0.4121933
62.2	-0.4796444	62.2	-0.554361	62.2	-0.4886336	62.2	-0.4671509	62.2	-0.4300117	62.2	-0.4694886	62.2	-0.4703806	62.2	-0.478731	62.2	-0.4113757	62.2	-0.4743136	62.2	-0.4441225	62.2	-0.4108593	62.2	-0.4183189	62.2	-0.3993905	62.2	-0.4090089	62.2	-0.4102435
62.4	-0.4822848	62.4	-0.5507624	62.4	-0.4861613	62.4	-0.4702393	62.4	-0.4276557	62.4	-0.4649184	62.4	-0.4719577	62.4	-0.4790474	62.4	-0.4081926	62.4	-0.4694224	62.4	-0.4400821	62.4	-0.4087256	62.4	-0.4237458	62.4	-0.400733	62.4	-0.4033327	62.4	-0.4125707
62.6	-0.4752177	62.6	-0.5494772	62.6	-0.4855614	62.6	-0.4690891	62.6	-0.421718	62.6	-0.4683071	62.6	-0.4668907	62.6	-0.4752751	62.6	-0.4065548	62.6	-0.4712102	62.6	-0.443339	62.6	-0.4083531	62.6	-0.4239462	62.6	-0.397121	62.6	-0.4057196	62.6	-0.4112384
62.8	-0.4782843	62.8	-0.54922	62.8	-0.477443	62.8	-0.4659534	62.8	-0.4286846	62.8	-0.4594723	62.8	-0.4642301	62.8	-0.4747369	62.8	-0.4029039	62.8	-0.4702646	62.8	-0.4389958	62.8	-0.4070989	62.8	-0.4253518	62.8	-0.3988154	62.8	-0.3984673	62.8	-0.4072903
63	-0.4778656	63	-0.5471615	63	-0.4832186	63	-0.4638035	63	-0.4246639	63	-0.4650482	63	-0.467545	63	-0.4758326	63	-0.4043583	63	-0.4696224	63	-0.434182	63	-0.4068975	63	-0.4157875	63	-0.3914181	63	-0.3988163	63	-0.4058907
63.2	-0.4731064	63.2	-0.5446422	63.2	-0.4814468	63.2	-0.4662621	63.2	-0.4175357	63.2	-0.4568365	63.2	-0.4603887	63.2	-0.4728164	63.2	-0.4038503	63.2	-0.4652467	63.2	-0.4346078	63.2	-0.4010274	63.2	-0.4159822	63.2	-0.3939779	63.2	-0.4002779	63.2	-0.4092139
63.4	-0.4751315	63.4	-0.5438062	63.4	-0.4766196	63.4	-0.4614442	63.4	-0.4186026	63.4	-0.4509924	63.4	-0.4629129	63.4	-0.4675662	63.4	-0.4028162	63.4	-0.4661714	63.4	-0.4294846	63.4	-0.39764	63.4	-0.4211289	63.4	-0.3967082	63.4	-0.3996224	63.4	-0.4043871
63.6	-0.4741697	63.6	-0.5405635	63.6	-0.4764885	63.6	-0.4621034	63.6	-0.4194299	63.6	-0.4582437	63.6	-0.4585095	63.6	-0.4674316	63.6	-0.4029015	63.6	-0.4624054	63.6	-0.4336059	63.6	-0.3988105	63.6	-0.4137819	63.6	-0.3941353	63.6	-0.3979374	63.6	-0.3998912
63.8	-0.4688377	63.8	-0.5408994	63.8	-0.4734237	63.8	-0.4584548	63.8	-0.4196762	63.8	-0.457035	63.8	-0.4600675	63.8	-0.4684794	63.8	-0.4014716	63.8	-0.4597637	63.8	-0.4327564	63.8	-0.3948087	63.8	-0.4111717	63.8	-0.3889835	63.8	-0.3937756	63.8	-0.3982625
64	-0.4663561	64	-0.5386066	64	-0.4741461	64	-0.4583692	64	-0.414572	64	-0.4556698	64	-0.4559116	64	-0.4685992	64	-0.3997907	64	-0.4604108	64	-0.4293888	64	-0.3971285	64	-0.4131619	64	-0.3879512	64	-0.3919635	64	-0.3938305
64.2	-0.4652127	64.2	-0.5374853	64.2	-0.4722225	64.2	-0.457597	64.2	-0.4163486	64.2	-0.449372	64.2	-0.4490779	64.2	-0.4615116	64.2	-0.3978698	64.2	-0.4617002	64.2	-0.4268151	64.2	-0.3939185	64.2	-0.413001	64.2	-0.383655	64.2	-0.3933567	64.2	-0.4002739
64.4	-0.4665487	64.4	-0.5387246	64.4	-0.4702229	64.4	-0.4525301	64.4	-0.4110077	64.4	-0.4489602	64.4	-0.4559877	64.4	-0.4647307	64.4	-0.3946658	64.4	-0.4602475	64.4	-0.424502	64.4	-0.391389	64.4	-0.4098502	64.4	-0.3864714	64.4	-0.3899916	64.4	-0.3962457
64.6	-0.4639556	64.6	-0.535576	64.6	-0.4713408	64.6	-0.4517751	64.6	-0.4093062	64.6	-0.4463893	64.6	-0.455752	64.6	-0.465424	64.6	-0.3970156	64.6	-0.4545919	64.6	-0.4227149	64.6	-0.3954101	64.6	-0.4092425	64.6	-0.383	64.6	-0.3931434	64.6	-0.3958804
64.8	-0.4644247	64.8	-0.5370448	64.8	-0.4678581	64.8	-0.4524488	64.8	-0.4096032	64.8	-0.4519973	64.8	-0.4517702	64.8	-0.4643891	64.8	-0.3891208	64.8	-0.4527173	64.8	-0.4256968	64.8	-0.3937222	64.8	-0.4082963	64.8	-0.3816372	64.8	-0.3910886	64.8	-0.393986
65	-0.4648713	65	-0.5360044	65	-0.4627903	65	-0.4465757	65	-0.4067302	65	-0.4461281	65	-0.4513082	65	-0.459516	65	-0.388168	65	-0.4590605	65	-0.4251267	65	-0.3930691	65	-0.4039679	65	-0.3840786	65	-0.3889211	65	-0.3915014
65.2	-0.4617629	65.2	-0.5306665	65.2	-0.4619285	65.2	-0.4492209	65.2	-0.408034	65.2	-0.4433104	65.2	-0.4510517	65.2	-0.4619362	65.2	-0.3949822	65.2	-0.4483513	65.2	-0.4213739	65.2	-0.3847072	65.2	-0.4065274	65.2	-0.3813105	65.2	-0.3853174	65.2	-0.39161
65.4	-0.4576306	65.4	-0.5294901	65.4	-0.4602513	65.4	-0.4461502	65.4	-0.4062662	65.4	-0.4472919	65.4	-0.4437492	65.4	-0.4610444	65.4	-0.3868099	65.4	-0.4479055	65.4	-0.4173267	65.4	-0.3873735	65.4	-0.4046586	65.4	-0.3762498	65.4	-0.383555	65.4	-0.3913665
65.6	-0.4559842	65.6	-0.5263872	65.6	-0.45849	65.6	-0.4430896	65.6	-0.4066053	65.6	-0.4401837	65.6	-0.447235	65.6	-0.452562	65.6	-0.3869517	65.6	-0.4571069	65.6	-0.4175561	65.6	-0.3853349	65.6	-0.3965021	65.6	-0.3800468	65.6	-0.3855553	65.6	-0.3919393
65.8	-0.4552523	65.8	-0.5265301	65.8	-0.4588771	65.8	-0.445022	65.8	-0.3974747	65.8	-0.4417737	65.8	-0.4472024	65.8	-0.4516962	65.8	-0.3899275	65.8	-0.4489823	65.8	-0.4170561	65.8	-0.3852407	65.8	-0.4063241	65.8	-0.3752511	65.8	-0.3839548	65.8	-0.3886457
66	-0.4548471	66	-0.523442	66	-0.4562312	66	-0.4449437	66	-0.3987744	66	-0.4383065	66	-0.4461201	66	-0.4505646	66	-0.3837377	66	-0.4464257	66	-0.4185005	66	-0.3825004	66	-0.4023333	66	-0.372674	66	-0.3843292	66	-0.3843849
66.2	-0.4577757	66.2	-0.5211349	66.2	-0.4600321	66.2	-0.4427221	66.2	-0.403933	66.2	-0.4368118	66.2	-0.4453745	66.2	-0.448212	66.2	-0.3832146	66.2	-0.4478147	66.2	-0.4183862	66.2	-0.384823	66.2	-0.3980441	66.2	-0.3770893	66.2	-0.3807202	66.2	-0.3821684
66.4	-0.4548522	66.4	-0.5206302	66.4	-0.4549544	66.4	-0.4410802	66.4	-0.4047755	66.4	-0.4415359	66.4	-0.4409578	66.4	-0.4523727	66.4	-0.3818752	66.4	-0.4448636	66.4	-0.4126974	66.4	-0.3759789	66.4	-0.3963084	66.4	-0.3723952	66.4	-0.3799683	66.4	-0.3836006
66.6	-0.4552324	66.6	-0.5216084	66.6	-0.4557316	66.6	-0.4380563	66.6	-0.3954689	66.6	-0.4372348	66.6	-0.4400616	66.6	-0.4535969	66.6	-0.3835744	66.6	-0.447709	66.6	-0.413729	66.6	-0.3815407	66.6	-0.3982843	66.6	-0.3737067	66.6	-0.3813752	66.6	-0.3794688
66.8	-0.4553906	66.8	-0.5189394	66.8	-0.4550679	66.8	-0.4424197	66.8	-0.397337	66.8	-0.4360938	66.8	-0.4416161	66.8	-0.4499207	66.8	-0.3813638	66.8	-0.4408926	66.8	-0.4105463	66.8	-0.3760547	66.8	-0.3973293	66.8	-0.3700031	66.8	-0.3773467	66.8	-0.3798737
67	-0.4466282	67	-0.5199336	67	-0.4531773	67	-0.4400243	67	-0.3950816	67	-0.4323862	67	-0.4397121	67	-0.4508575	67	-0.3863822	67	-0.44131	67	-0.4112127	67	-0.378522	67	-0.3967687	67	-0.3721253	67	-0.3737535	67	-0.3840428
67.2	-0.448557	67.2	-0.5170166	67.2	-0.4526367	67.2	-0.4370205	67.2	-0.3945296	67.2	-0.4292936	67.2	-0.4410945	67.2	-0.4443424	67.2	-0.3811841	67.2	-0.4403446	67.2	-0.4092757	67.2	-0.3775582	67.2	-0.3931803	67.2	-0.3646273	67.2	-0.3750784	67.2	-0.3779182
67.4	-0.4466388	67.4	-0.5175478	67.4	-0.4494417	67.4	-0.4392053	67.4	-0.395454	67.4	-0.4337817	67.4	-0.4372418	67.4	-0.4447702	67.4	-0.3807938	67.4	-0.4412806	67.4	-0.4103175	67.4	-0.3754019	67.4	-0.3927415	67.4	-0.3683935	67.4	-0.3755234	67.4	-0.3768686
67.6	-0.4449302	67.6	-0.5166844	67.6	-0.4502101	67.6	-0.4325103	67.6	-0.3908013	67.6	-0.4351014	67.6	-0.4326233	67.6	-0.4423437	67.6	-0.3768561	67.6	-0.4381562	67.6	-0.4093947	67.6	-0.3743966	67.6	-0.3898648	67.6	-0.3625377	67.6	-0.3720512	67.6	-0.3757819
67.8	-0.4409561	67.8	-0.5143671	67.8	-0.4469489	67.8	-0.4358319	67.8	-0.3925064	67.8	-0.4302658	67.8	-0.43359	67.8	-0.4437763	67.8	-0.3748547	67.8	-0.4341152	67.8	-0.4083803	67.8	-0.3710529	67.8	-0.3898905	67.8	-0.3650025	67.8	-0.3729489	67.8	-0.3743047
68	-0.4484521	68	-0.5118214	68	-0.4521858	68	-0.4359866	68	-0.3911086	68	-0.4230675	68	-0.4320773	68	-0.4448988	68	-0.375003	68	-0.4396791	68	-0.4066613	68	-0.3713048	68	-0.3891362	68	-0.3624063	68	-0.368261	68	-0.3751383
68.2	-0.4423616	68.2	-0.5103289	68.2	-0.4473633	68.2	-0.4313005	68.2	-0.3908053	68.2	-0.4297433	68.2	-0.4298711	68.2	-0.4402503	68.2	-0.3783428	68.2	-0.435324	68.2	-0.4064884	68.2	-0.3686481	68.2	-0.390199	68.2	-0.362242	68.2	-0.3740143	68.2	-0.3716168
68.4	-0.4425254	68.4	-0.5139224	68.4	-0.4434657	68.4	-0.4304821	68.4	-0.3835879	68.4	-0.4301496	68.4	-0.427626	68.4	-0.4382084	68.4	-0.3755181	68.4	-0.4334392	68.4	-0.4009641	68.4	-0.3702389	68.4	-0.3897305	68.4	-0.3614043	68.4	-0.3678893	68.4	-0.3754658
68.6	-0.4382518	68.6	-0.5102422	68.6	-0.4414196	68.6	-0.4300321	68.6	-0.3900876	68.6	-0.4222064	68.6	-0.4260001	68.6	-0.4352418	68.6	-0.3747238	68.6	-0.4343212	68.6	-0.3984512	68.6	-0.3643989	68.6	-0.3865353	68.6	-0.3552118	68.6	-0.372041	68.6	-0.3696566
68.8	-0.437585	68.8	-0.5116619	68.8	-0.4460913	68.8	-0.4263659	68.8	-0.386426	68.8	-0.4247726	68.8	-0.4250711	68.8	-0.4354274	68.8	-0.3716265	68.8	-0.4340987	68.8	-0.4021717	68.8	-0.3713092	68.8	-0.3870394	68.8	-0.3629511	68.8	-0.3635284	68.8	-0.370157
69	-0.4388646	69	-0.5086643	69	-0.4443044	69	-0.4277788	69	-0.3900947	69	-0.4253845	69	-0.4253168	69	-0.4387495	69	-0.3713286	69	-0.4283429	69	-0.4018487	69	-0.3706159	69	-0.3816327	69	-0.3578162	69	-0.3638556	69	-0.3687875
69.2	-0.4378743	69.2	-0.5096688	69.2	-0.44231	69.2	-0.4255143	69.2	-0.391692	69.2	-0.4206751	69.2	-0.4271298	69.2	-0.4325548	69.2	-0.3766485	69.2	-0.4307259	69.2	-0.3941644	69.2	-0.3682617	69.2	-0.3839406	69.2	-0.3604592	69.2	-0.3599697	69.2	-0.3667978
69.4	-0.4307461	69.4	-0.5030761	69.4	-0.4419484	69.4	-0.4270927	69.4	-0.383783	69.4	-0.4165512	69.4	-0.4282365	69.4	-0.4301507	69.4	-0.3682101	69.4	-0.4322611	69.4	-0.4013786	69.4	-0.3664531	69.4	-0.3776934	69.4	-0.3533056	69.4	-0.359325	69.4	-0.3653843
69.6	-0.4382712	69.6	-0.5075228	69.6	-0.4414714	69.6	-0.4243297	69.6	-0.3818361	69.6	-0.4180056	69.6	-0.4245171	69.6	-0.4304485	69.6	-0.3647868	69.6	-0.429362	69.6	-0.3956695	69.6	-0.3662005	69.6	-0.3870847	69.6	-0.3540967	69.6	-0.3607506	69.6	-0.3652331
69.8	-0.4365487	69.8	-0.5019943	69.8	-0.4361795	69.8	-0.4238909	69.8	-0.3808575	69.8	-0.4222077	69.8	-0.421424	69.8	-0.435288	69.8	-0.3688824	69.8	-0.4266247	69.8	-0.4004229	69.8	-0.3607289	69.8	-0.3787374	69.8	-0.3530947	69.8	-0.3560664	69.8	-0.3608217
70	-0.4334843	70	-0.5035513	70	-0.4381052	70	-0.4185928	70	-0.3829666	70	-0.4155923	70	-0.419332	70	-0.431236	70	-0.3640634	70	-0.4276638	70	-0.3960216	70	-0.363669	70	-0.3761608	70	-0.3537421	70	-0.3597489	70	-0.3680102
70.2	-0.4330092	70.2	-0.5045754	70.2	-0.4365453	70.2	-0.4175105	70.2	-0.384025	70.2	-0.4192728	70.2	-0.4225357	70.2	-0.4302546	70.2	-0.3645236	70.2	-0.4272809	70.2	-0.3979607	70.2	-0.3663068	70.2	-0.3813041	70.2	-0.351213	70.2	-0.360967	70.2	-0.3650027
70.4	-0.4310525	70.4	-0.4969085	70.4	-0.4361412	70.4	-0.420343	70.4	-0.3767703	70.4	-0.4166754	70.4	-0.4208604	70.4	-0.4306909	70.4	-0.3665725	70.4	-0.4252568	70.4	-0.3918452	70.4	-0.3617226	70.4	-0.3770289	70.4	-0.3499267	70.4	-0.3594613	70.4	-0.3582703
70.6	-0.4317105	70.6	-0.5030003	70.6	-0.4310314	70.6	-0.4143666	70.6	-0.3782761	70.6	-0.4179916	70.6	-0.4210291	70.6	-0.4275898	70.6	-0.3592499	70.6	-0.4273793	70.6	-0.3884872	70.6	-0.3590855	70.6	-0.3802207	70.6	-0.3524188	70.6	-0.3572792	70.6	-0.364941
70.8	-0.4298843	70.8	-0.4962673	70.8	-0.4343876	70.8	-0.4163808	70.8	-0.3755917	70.8	-0.4156478	70.8	-0.4185741	70.8	-0.4253681	70.8	-0.3614403	70.8	-0.4196334	70.8	-0.3882107	70.8	-0.3575451	70.8	-0.374121	70.8	-0.3497919	70.8	-0.3541365	70.8	-0.3582191
71	-0.4292073	71	-0.4990084	71	-0.4291464	71	-0.4185036	71	-0.3790593	71	-0.4102443	71	-0.4106878	71	-0.4274523	71	-0.3631528	71	-0.4231536	71	-0.3882404	71	-0.3591413	71	-0.3769622	71	-0.3449093	71	-0.3540919	71	-0.3598915
71.2	-0.4294299	71.2	-0.4960741	71.2	-0.4315966	71.2	-0.4182179	71.2	-0.3758892	71.2	-0.4138469	71.2	-0.4121199	71.2	-0.4272121	71.2	-0.3607779	71.2	-0.4203514	71.2	-0.3924543	71.2	-0.3576913	71.2	-0.3737162	71.2	-0.3490205	71.2	-0.3545211	71.2	-0.3590938
71.41	-0.4229784	71.41	-0.4970105	71.41	-0.4317301	71.41	-0.4207788	71.41	-0.3784019	71.41	-0.4116481	71.41	-0.4162622	71.41	-0.4243665	71.4	-0.3566821	71.4	-0.4198524	71.4	-0.3891507	71.4	-0.3571725	71.4	-0.3764412	71.4	-0.3465264	71.4	-0.3578041	71.4	-0.3554328
71.6	-0.4252985	71.6	-0.4956933	71.6	-0.4312745	71.6	-0.4165116	71.6	-0.3714995	71.6	-0.4118333	71.6	-0.4162695	71.6	-0.4231814	71.6	-0.3624207	71.6	-0.417943	71.6	-0.387678	71.6	-0.3551265	71.6	-0.3710879	71.6	-0.3457222	71.6	-0.3552601	71.6	-0.3548301
71.8	-0.4238323	71.8	-0.4964693	71.8	-0.4283067	71.8	-0.412678	71.8	-0.3742885	71.8	-0.410527	71.8	-0.4139654	71.8	-0.4229515	71.8	-0.3553	71.8	-0.4220327	71.8	-0.3880208	71.8	-0.3539557	71.8	-0.368895	71.8	-0.3468948	71.8	-0.3500637	71.8	-0.3581858
72	-0.4266858	72	-0.4896219	72	-0.428319	72	-0.4083895	72	-0.3750834	72	-0.4091755	72	-0.4117087	72	-0.4230944	72	-0.3558051	72	-0.4141225	72	-0.3882686	72	-0.3528251	72	-0.366894	72	-0.3441518	72	-0.3513393	72	-0.3523828
72.2	-0.4267468	72.2	-0.4940155	72.2	-0.4239187	72.2	-0.4140086	72.2	-0.3673073	72.2	-0.4073643	72.2	-0.4102799	72.2	-0.4171357	72.2	-0.3557841	72.2	-0.415533	72.2	-0.3878048	72.2	-0.3499796	72.2	-0.3696651	72.2	-0.3429407	72.2	-0.3514757	72.2	-0.3549639
72.4	-0.4242355	72.4	-0.4912071	72.4	-0.4246199	72.4	-0.4117854	72.4	-0.3719664	72.4	-0.4061855	72.4	-0.4125502	72.4	-0.4182961	72.4	-0.3535139	72.4	-0.4120808	72.4	-0.3869146	72.4	-0.3515914	72.4	-0.3659337	72.4	-0.3457648	72.4	-0.3526011	72.4	-0.353422
72.6	-0.4190655	72.6	-0.490307	72.6	-0.4285198	72.6	-0.4103749	72.6	-0.3679868	72.6	-0.4054924	72.6	-0.407138	72.6	-0.4200053	72.6	-0.3542825	72.6	-0.4132066	72.6	-0.3840046	72.6	-0.3503995	72.6	-0.3693469	72.6	-0.3407876	72.6	-0.3427074	72.6	-0.3508213
72.8	-0.4220081	72.8	-0.4936245	72.8	-0.4223997	72.8	-0.409162	72.8	-0.3701154	72.8	-0.4052939	72.8	-0.4118982	72.8	-0.4180708	72.8	-0.3501816	72.8	-0.4163251	72.8	-0.3832718	72.8	-0.3494677	72.8	-0.3699426	72.8	-0.3440252	72.8	-0.3471522	72.8	-0.3528588
73	-0.4226049	73	-0.4895552	73	-0.4261272	73	-0.408426	73	-0.3656958	73	-0.4034897	73	-0.4084513	73	-0.4138635	73	-0.3502141	73	-0.4097995	73	-0.3824107	73	-0.3484468	73	-0.3640212	73	-0.3385698	73	-0.3478282	73	-0.3527439
73.2	-0.4198463	73.2	-0.4870888	73.2	-0.4231993	73.2	-0.4073105	73.2	-0.365205	73.2	-0.4036214	73.2	-0.4074746	73.2	-0.4173533	73.2	-0.3506479	73.2	-0.4137468	73.2	-0.3819223	73.2	-0.3465625	73.2	-0.3632591	73.2	-0.3359874	73.2	-0.3450063	73.2	-0.3508926
73.4	-0.4174918	73.4	-0.4932113	73.4	-0.4216669	73.4	-0.4049699	73.4	-0.3674574	73.4	-0.4025073	73.4	-0.4057695	73.4	-0.4207613	73.4	-0.3530213	73.4	-0.40898	73.4	-0.3814648	73.4	-0.3475391	73.4	-0.3623963	73.4	-0.3361721	73.4	-0.3445064	73.4	-0.3439804
73.6	-0.417164	73.6	-0.486916	73.6	-0.4209093	73.6	-0.4065818	73.6	-0.3692332	73.6	-0.4019749	73.6	-0.401895	73.6	-0.4141428	73.6	-0.3504636	73.6	-0.4081333	73.6	-0.3814168	73.6	-0.3452433	73.6	-0.3627993	73.6	-0.3374442	73.6	-0.341756	73.6	-0.351739
73.8	-0.4197276	73.8	-0.4866755	73.8	-0.4165863	73.8	-0.4024442	73.8	-0.3675935	73.8	-0.4016465	73.8	-0.4089943	73.8	-0.4113833	73.8	-0.3500721	73.8	-0.4116967	73.8	-0.3743936	73.8	-0.3438955	73.8	-0.3653556	73.8	-0.3348273	73.8	-0.3430437	73.8	-0.3449428
74	-0.4132829	74	-0.4820361	74	-0.4154412	74	-0.4044232	74	-0.3621986	74	-0.3978789	74	-0.4044308	74	-0.412979	74	-0.3495003	74	-0.4114696	74	-0.378127	74	-0.3442609	74	-0.3597286	74	-0.3334198	74	-0.3462272	74	-0.3423379
74.2	-0.4173218	74.2	-0.4883603	74.2	-0.4212041	74.2	-0.405398	74.2	-0.3581699	74.2	-0.4003138	74.2	-0.3976939	74.2	-0.4113859	74.2	-0.3421974	74.2	-0.405693	74.2	-0.374713	74.2	-0.3436107	74.2	-0.3608748	74.2	-0.3307837	74.2	-0.3407756	74.2	-0.3444757
74.4	-0.4128956	74.4	-0.480814	74.4	-0.4204876	74.4	-0.4053717	74.4	-0.3607486	74.4	-0.3928581	74.4	-0.3987759	74.4	-0.4134267	74.4	-0.3481265	74.4	-0.4070879	74.4	-0.3747959	74.4	-0.3467031	74.4	-0.3585234	74.4	-0.3313693	74.4	-0.3418316	74.4	-0.3403354
74.6	-0.4094698	74.6	-0.4872345	74.6	-0.4165304	74.6	-0.4040332	74.6	-0.363849	74.6	-0.3918512	74.6	-0.4006575	74.6	-0.4082642	74.6	-0.3470922	74.6	-0.4052623	74.6	-0.3742572	74.6	-0.3368902	74.6	-0.3612236	74.6	-0.3395527	74.6	-0.336416	74.6	-0.3487928
74.8	-0.4165384	74.8	-0.4823867	74.8	-0.4130739	74.8	-0.4050957	74.8	-0.3615985	74.8	-0.3985205	74.8	-0.3975902	74.8	-0.407901	74.8	-0.344354	74.8	-0.4063806	74.8	-0.3750777	74.8	-0.3453262	74.8	-0.3622522	74.8	-0.3352451	74.8	-0.3394683	74.8	-0.347557
75	-0.4098751	75	-0.486295	75	-0.4143954	75	-0.4005599	75	-0.365096	75	-0.3959186	75	-0.3985336	75	-0.4049443	75	-0.3437892	75	-0.4057654	75	-0.3757227	75	-0.3368705	75	-0.3578468	75	-0.3283487	75	-0.3377717	75	-0.3426883
75.2	-0.4133542	75.2	-0.4787	75.2	-0.4158313	75.2	-0.3996813	75.2	-0.3573821	75.2	-0.3971005	75.2	-0.3944829	75.2	-0.4099756	75.2	-0.3376691	75.2	-0.4061158	75.2	-0.3740713	75.2	-0.3397866	75.2	-0.357211	75.2	-0.3312961	75.2	-0.3374296	75.2	-0.3409407
75.4	-0.4099251	75.4	-0.4791548	75.4	-0.4111792	75.4	-0.3978094	75.4	-0.3606343	75.4	-0.3983885	75.4	-0.3993779	75.4	-0.4050761	75.4	-0.340862	75.4	-0.4001247	75.4	-0.3708964	75.4	-0.3393831	75.4	-0.3560648	75.4	-0.3290311	75.4	-0.3388415	75.4	-0.343237
75.6	-0.4110446	75.6	-0.4804918	75.6	-0.4143256	75.6	-0.3961103	75.6	-0.3600729	75.6	-0.3903839	75.6	-0.400412	75.6	-0.4082686	75.6	-0.3389911	75.6	-0.4003213	75.6	-0.3744757	75.6	-0.3374338	75.6	-0.3541076	75.6	-0.3301501	75.6	-0.333548	75.6	-0.3363927
75.8	-0.4029182	75.8	-0.4775361	75.8	-0.4112515	75.8	-0.4005254	75.8	-0.356708	75.8	-0.3904696	75.8	-0.3950733	75.8	-0.4048796	75.8	-0.3403502	75.8	-0.3993752	75.8	-0.3708283	75.8	-0.3392172	75.8	-0.3538439	75.8	-0.3294457	75.8	-0.3341552	75.8	-0.3400466
76	-0.4078755	76	-0.4777551	76	-0.411516	76	-0.3970431	76	-0.3570489	76	-0.3913312	76	-0.3951613	76	-0.4052124	76	-0.3447789	76	-0.4000853	76	-0.373591	76	-0.3367671	76	-0.3565822	76	-0.3290421	76	-0.3366308	76	-0.3417893
76.2	-0.408253	76.2	-0.4803919	76.2	-0.4104634	76.2	-0.3931576	76.2	-0.3564645	76.2	-0.3906609	76.2	-0.3946069	76.2	-0.4042032	76.2	-0.3411228	76.2	-0.402409	76.2	-0.3682902	76.2	-0.3374474	76.2	-0.352859	76.2	-0.3292194	76.2	-0.3351654	76.2	-0.3398618
76.4	-0.4055172	76.4	-0.4768269	76.4	-0.4072052	76.4	-0.3927108	76.4	-0.3526437	76.4	-0.3918216	76.4	-0.3935148	76.4	-0.4039076	76.4	-0.3360877	76.4	-0.3998278	76.4	-0.3677046	76.4	-0.3351265	76.4	-0.3577552	76.4	-0.3269508	76.4	-0.3310292	76.4	-0.3389448
76.6	-0.4062579	76.6	-0.4762508	76.6	-0.4089678	76.6	-0.3920029	76.6	-0.3539551	76.6	-0.3938651	76.6	-0.3883075	76.6	-0.4048709	76.6	-0.3414699	76.6	-0.3944403	76.6	-0.3617732	76.6	-0.3363788	76.6	-0.3513863	76.6	-0.3236179	76.6	-0.3286316	76.6	-0.3370245
76.8	-0.4053432	76.8	-0.4727059	76.8	-0.4060737	76.8	-0.3972812	76.8	-0.3539315	76.8	-0.3890069	76.8	-0.3928664	76.8	-0.399966	76.8	-0.3406673	76.8	-0.4025911	76.8	-0.3679795	76.8	-0.3302437	76.8	-0.3514379	76.8	-0.3235952	76.8	-0.3305584	76.8	-0.3381465
77	-0.4074197	77	-0.4738865	77	-0.4063208	77	-0.3989255	77	-0.3542233	77	-0.3878742	77	-0.3945754	77	-0.3945723	77	-0.3336331	77	-0.3996803	77	-0.3627411	77	-0.3344504	77	-0.3489883	77	-0.3248421	77	-0.3269007	77	-0.3362463
77.2	-0.4074266	77.2	-0.4745936	77.2	-0.4083008	77.2	-0.3907741	77.2	-0.3505599	77.2	-0.3874841	77.2	-0.3877068	77.2	-0.3989043	77.2	-0.3374108	77.2	-0.3947424	77.2	-0.369087	77.2	-0.3348057	77.2	-0.3492733	77.2	-0.321477	77.2	-0.331169	77.2	-0.339242
77.4	-0.4049528	77.4	-0.475174	77.4	-0.4106034	77.4	-0.3919036	77.4	-0.346903	77.4	-0.3859812	77.4	-0.3869495	77.4	-0.4015175	77.4	-0.3324763	77.4	-0.3936652	77.4	-0.3654344	77.4	-0.3325106	77.4	-0.3484396	77.4	-0.3210556	77.4	-0.3281278	77.4	-0.3383186
77.6	-0.4005429	77.6	-0.4729141	77.6	-0.4068066	77.6	-0.3885159	77.6	-0.3522158	77.6	-0.3891819	77.6	-0.3909017	77.6	-0.3986729	77.6	-0.3324037	77.6	-0.3943411	77.6	-0.3640848	77.6	-0.3314366	77.6	-0.3523355	77.6	-0.321212	77.6	-0.3297122	77.6	-0.3345159
77.8	-0.4020748	77.8	-0.4734665	77.8	-0.4035012	77.8	-0.393811	77.8	-0.3488753	77.8	-0.3920882	77.8	-0.3897573	77.8	-0.3967902	77.8	-0.3338057	77.8	-0.3943715	77.8	-0.3627634	77.8	-0.330499	77.8	-0.3472412	77.8	-0.3205084	77.8	-0.3287595	77.8	-0.3316065
78	-0.4072458	78	-0.4683812	78	-0.4051583	78	-0.3889007	78	-0.3513257	78	-0.3872304	78	-0.3916423	78	-0.4003337	78	-0.3377177	78	-0.3940207	78	-0.3633693	78	-0.328296	78	-0.3472492	78	-0.3238423	78	-0.3273366	78	-0.3364052
78.2	-0.3955629	78.2	-0.4678702	78.2	-0.4004011	78.2	-0.3911598	78.2	-0.3474426	78.2	-0.385294	78.2	-0.3859221	78.2	-0.3994885	78.2	-0.3325459	78.2	-0.392352	78.2	-0.360029	78.2	-0.3269051	78.2	-0.3450712	78.2	-0.31824	78.2	-0.3267465	78.2	-0.3303988
78.4	-0.4006767	78.4	-0.4676259	78.4	-0.4027067	78.4	-0.386163	78.4	-0.3483161	78.4	-0.383946	78.4	-0.3868512	78.4	-0.3923819	78.4	-0.334242	78.4	-0.3883874	78.4	-0.3614803	78.4	-0.3303239	78.4	-0.3485316	78.4	-0.3181086	78.4	-0.3207198	78.4	-0.3291362
78.6	-0.3986605	78.6	-0.4678048	78.6	-0.4010784	78.6	-0.3882029	78.6	-0.3459274	78.6	-0.3852572	78.6	-0.384551	78.6	-0.3945173	78.6	-0.3324702	78.6	-0.3924811	78.6	-0.3622584	78.6	-0.3244796	78.6	-0.3456768	78.6	-0.3190747	78.6	-0.3295639	78.6	-0.3364539
78.8	-0.3997467	78.8	-0.4661528	78.8	-0.4053546	78.8	-0.3865367	78.8	-0.344366	78.8	-0.3804354	78.8	-0.3874265	78.8	-0.3954712	78.8	-0.3340275	78.8	-0.3908695	78.8	-0.3598191	78.8	-0.3285046	78.8	-0.342188	78.8	-0.3179274	78.8	-0.3273937	78.8	-0.3299457
79	-0.4015745	79	-0.4643302	79	-0.4029143	79	-0.3812522	79	-0.3454171	79	-0.3803602	79	-0.3831941	79	-0.3924833	79	-0.3297371	79	-0.3911738	79	-0.3600971	79	-0.3245632	79	-0.3447719	79	-0.3189174	79	-0.3217416	79	-0.3265703
79.2	-0.3968956	79.2	-0.4679225	79.2	-0.3993247	79.2	-0.3819971	79.2	-0.3521299	79.2	-0.379452	79.2	-0.3813308	79.2	-0.3934577	79.2	-0.3307888	79.2	-0.3870424	79.2	-0.360345	79.2	-0.3279244	79.2	-0.3399126	79.2	-0.3127948	79.2	-0.3242295	79.2	-0.3282259
79.4	-0.395424	79.4	-0.4629718	79.4	-0.3979816	79.4	-0.3829449	79.4	-0.3441937	79.4	-0.382272	79.4	-0.3875915	79.4	-0.3929641	79.4	-0.3283058	79.4	-0.3892488	79.4	-0.3562367	79.4	-0.3260257	79.4	-0.3404021	79.4	-0.3130717	79.4	-0.3235295	79.4	-0.3258436
79.6	-0.3990327	79.6	-0.4645388	79.6	-0.3998659	79.6	-0.3870129	79.6	-0.3455799	79.6	-0.3770682	79.6	-0.3891078	79.6	-0.3917234	79.6	-0.3317827	79.6	-0.3865109	79.6	-0.3529852	79.6	-0.3220156	79.6	-0.342008	79.6	-0.3119147	79.6	-0.3173422	79.6	-0.3268629
79.8	-0.3951164	79.8	-0.464524	79.8	-0.398938	79.8	-0.3878605	79.8	-0.3418717	79.8	-0.3765615	79.8	-0.3816963	79.8	-0.3931654	79.8	-0.3308424	79.8	-0.3896666	79.8	-0.3560807	79.8	-0.3203931	79.8	-0.3413933	79.8	-0.3145145	79.8	-0.3182485	79.8	-0.3266827
80	-0.3985816	80	-0.4635767	80	-0.3953978	80	-0.3828187	80	-0.3428016	80	-0.3766742	80	-0.3831925	80	-0.3910105	80	-0.3301614	80	-0.3847302	80	-0.3577108	80	-0.3209879	80	-0.339771	80	-0.3145349	80	-0.3178357	80	-0.3246859
80.2	-0.3935391	80.2	-0.4627332	80.2	-0.3964322	80.2	-0.3845195	80.2	-0.3431934	80.2	-0.3771935	80.2	-0.3794751	80.2	-0.3908834	80.2	-0.3287992	80.2	-0.3832069	80.2	-0.3582225	80.2	-0.3213927	80.2	-0.3364376	80.2	-0.3087658	80.2	-0.3173415	80.2	-0.3234718
80.4	-0.3922976	80.4	-0.4612672	80.4	-0.3927994	80.4	-0.3788028	80.4	-0.3409454	80.4	-0.3737563	80.4	-0.3837445	80.4	-0.3877899	80.4	-0.325095	80.4	-0.3841664	80.4	-0.3533473	80.4	-0.3201537	80.4	-0.3399014	80.4	-0.3095272	80.4	-0.3153666	80.4	-0.3272338
80.6	-0.3896052	80.6	-0.4653637	80.6	-0.3972111	80.6	-0.3805936	80.6	-0.3446454	80.6	-0.3746274	80.6	-0.3805672	80.6	-0.3830668	80.6	-0.3270821	80.6	-0.3831182	80.6	-0.3520962	80.6	-0.3185885	80.6	-0.3405752	80.6	-0.3123513	80.6	-0.3170261	80.6	-0.3252413
80.8	-0.3967066	80.8	-0.4595061	80.8	-0.394517	80.8	-0.378293	80.8	-0.3413354	80.8	-0.3738376	80.8	-0.3807221	80.8	-0.3870766	80.8	-0.3240574	80.8	-0.3838409	80.8	-0.3541349	80.8	-0.3204626	80.8	-0.3384916	80.8	-0.3047415	80.8	-0.3163851	80.8	-0.3274287
81	-0.3870045	81	-0.4570193	81	-0.3947174	81	-0.3834629	81	-0.33676	81	-0.3744406	81	-0.3869828	81	-0.3866542	81	-0.3234771	81	-0.3818387	81	-0.3542985	81	-0.3193214	81	-0.3380105	81	-0.311267	81	-0.3182579	81	-0.3226532
81.2	-0.3935977	81.2	-0.4615848	81.2	-0.3950418	81.2	-0.3776249	81.2	-0.3387915	81.2	-0.3695902	81.2	-0.3808809	81.2	-0.3842487	81.2	-0.3196281	81.2	-0.377696	81.2	-0.3495432	81.2	-0.3158017	81.2	-0.3304637	81.2	-0.3085174	81.2	-0.3136962	81.2	-0.3228859
81.4	-0.3920439	81.4	-0.4585333	81.4	-0.3932841	81.4	-0.3787782	81.4	-0.3349916	81.4	-0.3717944	81.4	-0.3786508	81.4	-0.3855442	81.4	-0.3285966	81.4	-0.3786913	81.4	-0.3499969	81.4	-0.3145102	81.4	-0.3374557	81.4	-0.3140588	81.4	-0.3157064	81.4	-0.323451
81.6	-0.3920073	81.6	-0.4555653	81.6	-0.3904602	81.6	-0.3793722	81.6	-0.3397575	81.6	-0.373427	81.6	-0.380385	81.6	-0.385573	81.6	-0.3235226	81.6	-0.3792933	81.6	-0.3526079	81.6	-0.3157792	81.6	-0.3344217	81.6	-0.3110189	81.6	-0.3120962	81.6	-0.3183208
81.8	-0.3853836	81.8	-0.4567082	81.8	-0.3930425	81.8	-0.3826705	81.8	-0.3357283	81.8	-0.3712001	81.8	-0.373491	81.8	-0.3813151	81.8	-0.3245992	81.8	-0.3765632	81.8	-0.3482735	81.8	-0.3170813	81.8	-0.3342122	81.8	-0.3088757	81.8	-0.3159173	81.8	-0.3236748
82	-0.3924364	82	-0.4574915	82	-0.3931668	82	-0.3748419	82	-0.3357219	82	-0.3701732	82	-0.3785146	82	-0.3861558	82	-0.3199503	82	-0.3795272	82	-0.3508579	82	-0.3184327	82	-0.3377895	82	-0.3033935	82	-0.3133222	82	-0.3203729
82.2	-0.388113	82.2	-0.4559321	82.2	-0.3909048	82.2	-0.3716524	82.2	-0.3352009	82.2	-0.3687776	82.2	-0.3745472	82.2	-0.3817696	82.2	-0.3200351	82.2	-0.3806096	82.2	-0.3440422	82.2	-0.3128154	82.2	-0.3310685	82.2	-0.3041708	82.2	-0.3095417	82.2	-0.3186441
82.4	-0.3873801	82.4	-0.4527377	82.4	-0.3892286	82.4	-0.3782222	82.4	-0.3325003	82.4	-0.3721722	82.4	-0.3725375	82.4	-0.376137	82.4	-0.31698	82.4	-0.3849293	82.4	-0.3463186	82.4	-0.3171884	82.4	-0.3345306	82.4	-0.3032001	82.4	-0.3122301	82.4	-0.3200772
82.6	-0.3872081	82.6	-0.4507495	82.6	-0.3905393	82.6	-0.3744807	82.6	-0.3376525	82.6	-0.3697577	82.6	-0.3743534	82.6	-0.3791213	82.6	-0.3142726	82.6	-0.3796842	82.6	-0.3498873	82.6	-0.3136268	82.6	-0.3319107	82.6	-0.3036451	82.6	-0.3120775	82.6	-0.3212233
82.8	-0.3895317	82.8	-0.4555331	82.8	-0.3857617	82.8	-0.3710482	82.8	-0.3325142	82.8	-0.3683809	82.8	-0.3731537	82.8	-0.3821561	82.8	-0.3154105	82.8	-0.3780338	82.8	-0.3441028	82.8	-0.3175929	82.8	-0.3293388	82.8	-0.3032104	82.8	-0.311576	82.8	-0.3153772
83	-0.3829525	83	-0.4522402	83	-0.3891811	83	-0.3752875	83	-0.3277323	83	-0.3652003	83	-0.3720819	83	-0.3828716	83	-0.3166213	83	-0.3762206	83	-0.3401121	83	-0.3128789	83	-0.3285721	83	-0.2997473	83	-0.3097437	83	-0.3179242
83.2	-0.3862354	83.2	-0.4550867	83.2	-0.3852305	83.2	-0.369766	83.2	-0.3317487	83.2	-0.3668264	83.2	-0.3768271	83.2	-0.3817343	83.2	-0.3187234	83.2	-0.3750803	83.2	-0.3426013	83.2	-0.3101937	83.2	-0.3268106	83.2	-0.3015338	83.2	-0.307326	83.2	-0.3162376
83.4	-0.3835862	83.4	-0.4545706	83.4	-0.3869503	83.4	-0.3690324	83.4	-0.3320514	83.4	-0.3660367	83.4	-0.3684178	83.4	-0.3772794	83.4	-0.3126913	83.4	-0.3747524	83.4	-0.3433899	83.4	-0.3099104	83.4	-0.3309433	83.4	-0.3068988	83.4	-0.3102928	83.4	-0.3117155
83.6	-0.3851416	83.6	-0.4524233	83.6	-0.3872474	83.6	-0.3714641	83.6	-0.3262663	83.6	-0.3652087	83.6	-0.3697831	83.6	-0.3763677	83.6	-0.3166808	83.6	-0.3686745	83.6	-0.3421139	83.6	-0.3135221	83.6	-0.3299585	83.6	-0.2988536	83.6	-0.3059336	83.6	-0.3172381
83.8	-0.3849614	83.8	-0.4509623	83.8	-0.3885663	83.8	-0.366513	83.8	-0.3313993	83.8	-0.3657403	83.8	-0.3666711	83.8	-0.3759044	83.8	-0.3144768	83.8	-0.3714494	83.8	-0.3426434	83.8	-0.3119137	83.8	-0.3305599	83.8	-0.3005809	83.8	-0.3067225	83.8	-0.3164337
84	-0.3829959	84	-0.4522476	84	-0.3826169	84	-0.3713305	84	-0.3293536	84	-0.3656721	84	-0.3712597	84	-0.3790917	84	-0.3167379	84	-0.371557	84	-0.3380443	84	-0.3077521	84	-0.3268951	84	-0.2959399	84	-0.3062898	84	-0.315229
84.2	-0.3837805	84.2	-0.4525901	84.2	-0.3853508	84.2	-0.3690366	84.2	-0.3289434	84.2	-0.3663179	84.2	-0.3701329	84.2	-0.3731014	84.2	-0.3170788	84.2	-0.3679558	84.2	-0.3423403	84.2	-0.3071693	84.2	-0.3251637	84.2	-0.3009849	84.2	-0.3079832	84.2	-0.3139808
84.4	-0.382843	84.4	-0.4481122	84.4	-0.3840682	84.4	-0.3694967	84.4	-0.3274119	84.4	-0.3623396	84.4	-0.3663098	84.4	-0.3765771	84.4	-0.3088797	84.4	-0.3739706	84.4	-0.3397904	84.4	-0.3066439	84.4	-0.3255554	84.4	-0.2999744	84.4	-0.3071543	84.4	-0.3101728
84.6	-0.3794732	84.6	-0.4484716	84.6	-0.3798105	84.6	-0.3703342	84.6	-0.3267456	84.6	-0.3674827	84.6	-0.3680997	84.6	-0.3763618	84.6	-0.3118096	84.6	-0.3690999	84.6	-0.3429541	84.6	-0.3098636	84.6	-0.3230799	84.6	-0.2959512	84.6	-0.301689	84.6	-0.3186269
84.8	-0.3771892	84.8	-0.4442439	84.8	-0.3788705	84.8	-0.3697543	84.8	-0.3294413	84.8	-0.3593064	84.8	-0.3701326	84.8	-0.3789662	84.8	-0.3160048	84.8	-0.369001	84.8	-0.3342037	84.8	-0.3080014	84.8	-0.3290063	84.8	-0.2988347	84.8	-0.3018598	84.8	-0.3148444
85	-0.3788936	85	-0.4424943	85	-0.3886205	85	-0.3669434	85	-0.3279662	85	-0.3597643	85	-0.363006	85	-0.3700223	85	-0.3116826	85	-0.3674358	85	-0.3387798	85	-0.3085173	85	-0.3251565	85	-0.2925254	85	-0.3051273	85	-0.3100386
85.2	-0.3809219	85.2	-0.4426942	85.2	-0.3810774	85.2	-0.3671863	85.2	-0.3260566	85.2	-0.3638559	85.2	-0.3644072	85.2	-0.3744203	85.2	-0.3158959	85.2	-0.3683681	85.2	-0.3329625	85.2	-0.3038961	85.2	-0.3213067	85.2	-0.2945151	85.2	-0.3016504	85.2	-0.3124349
85.4	-0.3778886	85.4	-0.4467734	85.4	-0.3798531	85.4	-0.3654779	85.4	-0.3255903	85.4	-0.3611978	85.4	-0.3655818	85.4	-0.3702719	85.4	-0.3103627	85.4	-0.3661772	85.4	-0.3356214	85.4	-0.310721	85.4	-0.3231076	85.4	-0.2954939	85.4	-0.3067926	85.4	-0.3133205
85.6	-0.3778653	85.6	-0.4454	85.6	-0.3809583	85.6	-0.3674542	85.6	-0.322147	85.6	-0.361624	85.6	-0.3620529	85.6	-0.3714674	85.6	-0.3074948	85.6	-0.3680693	85.6	-0.3390968	85.6	-0.303567	85.6	-0.3214193	85.6	-0.2964252	85.6	-0.3045459	85.6	-0.3049382
85.8	-0.3773607	85.8	-0.4465755	85.8	-0.3790556	85.8	-0.3643797	85.8	-0.3237524	85.8	-0.359791	85.8	-0.3617508	85.8	-0.3729774	85.8	-0.3025365	85.8	-0.3659295	85.8	-0.333734	85.8	-0.3018396	85.8	-0.3206595	85.8	-0.2973257	85.8	-0.3010417	85.8	-0.3112794
86	-0.3730499	86	-0.4467293	86	-0.380939	86	-0.3669356	86	-0.3250475	86	-0.3604752	86	-0.3621789	86	-0.3694471	86	-0.3125847	86	-0.3707231	86	-0.3343022	86	-0.3041684	86	-0.324481	86	-0.2939542	86	-0.3045606	86	-0.3054805
86.2	-0.3820588	86.2	-0.4443079	86.2	-0.378549	86.2	-0.3662165	86.2	-0.3219642	86.2	-0.363313	86.2	-0.3616529	86.2	-0.3752993	86.2	-0.3061028	86.2	-0.3677305	86.2	-0.3402265	86.2	-0.3004061	86.2	-0.3200504	86.2	-0.2921518	86.2	-0.3017052	86.2	-0.3136085
86.4	-0.375972	86.4	-0.4389856	86.4	-0.3774415	86.4	-0.363797	86.4	-0.3233196	86.4	-0.3556738	86.4	-0.3643727	86.4	-0.3724415	86.4	-0.30446	86.4	-0.3662511	86.4	-0.3367409	86.4	-0.3033297	86.4	-0.3221191	86.4	-0.2915786	86.4	-0.303281	86.4	-0.3079122
86.6	-0.3729187	86.6	-0.4390379	86.6	-0.3787836	86.6	-0.3617694	86.6	-0.3220303	86.6	-0.3565263	86.6	-0.3555444	86.6	-0.3707739	86.6	-0.3073213	86.6	-0.3648001	86.6	-0.3352594	86.6	-0.2995822	86.6	-0.321971	86.6	-0.29185	86.6	-0.2998797	86.6	-0.3106806
86.8	-0.3704941	86.8	-0.443489	86.8	-0.3742693	86.8	-0.3650635	86.8	-0.3213433	86.8	-0.3567422	86.8	-0.3602992	86.8	-0.3672155	86.8	-0.3059134	86.8	-0.3655567	86.8	-0.336752	86.8	-0.3022282	86.8	-0.3217461	86.8	-0.2890918	86.8	-0.295479	86.8	-0.3055689
87	-0.3756717	87	-0.4417527	87	-0.375545	87	-0.3639434	87	-0.322607	87	-0.352489	87	-0.3604738	87	-0.3688241	87	-0.3013886	87	-0.3653459	87	-0.3348767	87	-0.3025494	87	-0.319622	87	-0.2909406	87	-0.298379	87	-0.3087618
87.2	-0.3755901	87.2	-0.4422439	87.2	-0.3743799	87.2	-0.3636854	87.2	-0.3195338	87.2	-0.3544565	87.2	-0.361683	87.2	-0.3684022	87.2	-0.305032	87.2	-0.367077	87.2	-0.3373664	87.2	-0.3013873	87.2	-0.3198529	87.2	-0.2879367	87.2	-0.3019365	87.2	-0.3047461
87.4	-0.3713878	87.4	-0.4403794	87.4	-0.3753836	87.4	-0.3606496	87.4	-0.3195616	87.4	-0.3542508	87.4	-0.360091	87.4	-0.3671044	87.4	-0.3015024	87.4	-0.3648291	87.4	-0.3371252	87.4	-0.2999688	87.4	-0.3192559	87.4	-0.2904162	87.4	-0.2964942	87.4	-0.307881
87.6	-0.3723987	87.6	-0.4396501	87.6	-0.3727103	87.6	-0.3590398	87.6	-0.3201199	87.6	-0.3542455	87.6	-0.3624772	87.6	-0.3658016	87.6	-0.3062126	87.6	-0.3638269	87.6	-0.3300132	87.6	-0.2987662	87.6	-0.3191972	87.6	-0.2917073	87.6	-0.297804	87.6	-0.3045191
87.8	-0.3719347	87.8	-0.4409267	87.8	-0.3754309	87.8	-0.3627197	87.8	-0.3192881	87.8	-0.3528876	87.8	-0.3601847	87.8	-0.3638914	87.8	-0.3001389	87.8	-0.3620174	87.8	-0.3302561	87.8	-0.2945637	87.8	-0.3178798	87.8	-0.2872299	87.8	-0.2957179	87.8	-0.3026314
88	-0.3696456	88	-0.4413549	88	-0.370942	88	-0.3606403	88	-0.3141674	88	-0.3559786	88	-0.3558723	88	-0.3624183	88	-0.3011732	88	-0.3611932	88	-0.3368221	88	-0.2981875	88	-0.321213	88	-0.2869714	88	-0.2955763	88	-0.304469
88.2	-0.3699883	88.2	-0.4372975	88.2	-0.3707268	88.2	-0.3549365	88.2	-0.3194287	88.2	-0.3521627	88.2	-0.3532593	88.2	-0.3663924	88.2	-0.3009203	88.2	-0.3559991	88.2	-0.331385	88.2	-0.3002798	88.2	-0.3181052	88.2	-0.288258	88.2	-0.2961253	88.2	-0.3020057
88.4	-0.3708154	88.4	-0.4359513	88.4	-0.3755639	88.4	-0.358725	88.4	-0.3197979	88.4	-0.3484432	88.4	-0.3558594	88.4	-0.3681535	88.4	-0.3049786	88.4	-0.3599939	88.4	-0.3296083	88.4	-0.30063	88.4	-0.3167333	88.4	-0.2868831	88.4	-0.2959838	88.4	-0.3047643
88.6	-0.3705391	88.6	-0.4412496	88.6	-0.3768389	88.6	-0.3565343	88.6	-0.3171204	88.6	-0.3508646	88.6	-0.3538648	88.6	-0.3631514	88.6	-0.2951511	88.6	-0.356692	88.6	-0.3266807	88.6	-0.2926546	88.6	-0.3134502	88.6	-0.2882109	88.6	-0.2955498	88.6	-0.303154
88.8	-0.3705845	88.8	-0.4329824	88.8	-0.3734745	88.8	-0.3595971	88.8	-0.3170738	88.8	-0.3538163	88.8	-0.355555	88.8	-0.359929	88.8	-0.3012761	88.8	-0.3582599	88.8	-0.330515	88.8	-0.293583	88.8	-0.3129209	88.8	-0.2897291	88.8	-0.2941639	88.8	-0.2988527
89	-0.3673664	89	-0.4331564	89	-0.3762732	89	-0.3539856	89	-0.3162289	89	-0.3505079	89	-0.3538294	89	-0.3641633	89	-0.3010163	89	-0.3625365	89	-0.3302257	89	-0.2968366	89	-0.3130771	89	-0.2837955	89	-0.2921396	89	-0.2995985
89.2	-0.3732023	89.2	-0.4349202	89.2	-0.3695147	89.2	-0.3564744	89.2	-0.3156319	89.2	-0.3464799	89.2	-0.3575352	89.2	-0.3612033	89.2	-0.3009131	89.2	-0.3549146	89.2	-0.3255059	89.2	-0.2978537	89.2	-0.3124478	89.2	-0.2877661	89.2	-0.2918982	89.2	-0.2993885
89.4	-0.3647851	89.4	-0.4375439	89.4	-0.3656521	89.4	-0.3544138	89.4	-0.3122681	89.4	-0.3508586	89.4	-0.3530647	89.4	-0.3643991	89.4	-0.2997296	89.4	-0.3592553	89.4	-0.3291107	89.4	-0.2964916	89.4	-0.3148963	89.4	-0.2833402	89.4	-0.2870027	89.4	-0.302057
89.61	-0.3691354	89.61	-0.4326014	89.61	-0.3665378	89.61	-0.352663	89.61	-0.3179807	89.61	-0.3500803	89.61	-0.3537012	89.61	-0.3598629	89.6	-0.3012537	89.6	-0.3571939	89.6	-0.3250294	89.6	-0.2932847	89.6	-0.3128702	89.6	-0.2801423	89.6	-0.2896404	89.6	-0.2953652
89.8	-0.369055	89.8	-0.4332427	89.8	-0.3699534	89.8	-0.353629	89.8	-0.3109041	89.8	-0.3482664	89.8	-0.3552519	89.8	-0.3572146	89.8	-0.3001681	89.8	-0.3559783	89.8	-0.3251565	89.8	-0.2929922	89.8	-0.3129748	89.8	-0.283105	89.8	-0.2881497	89.8	-0.2978369
90	-0.3825271	90	-0.4475572	90	-0.391085	90	-0.3716759	90	-0.3235239	90	-0.3679824	90	-0.3722729	90	-0.3547176	90	-0.2949596	90	-0.3513409	90	-0.3173721	90	-0.2923871	90	-0.3050592	90	-0.2813658	90	-0.2885884	90	-0.2997389
90.2	-0.3716949	90.2	-0.4418989	90.2	-0.376969	90.2	-0.3576837	90.2	-0.3143269	90.2	-0.3623307	90.2	-0.364923	90.2	-0.3519457	90.2	-0.2983764	90.2	-0.3558787	90.2	-0.3263198	90.2	-0.2893955	90.2	-0.3046012	90.2	-0.2759706	90.2	-0.2889099	90.2	-0.2959083
90.4	-0.3613184	90.4	-0.4341168	90.4	-0.3695328	90.4	-0.3539341	90.4	-0.3088323	90.4	-0.3566782	90.4	-0.3566873	90.4	-0.3494089	90.4	-0.2881416	90.4	-0.3518222	90.4	-0.3180592	90.4	-0.2892267	90.4	-0.3062679	90.4	-0.2777945	90.4	-0.2882072	90.4	-0.2937686
90.6	-0.3551371	90.6	-0.4283648	90.6	-0.3573628	90.6	-0.3417966	90.6	-0.2963534	90.6	-0.341986	90.6	-0.3471836	90.6	-0.3500621	90.6	-0.2918122	90.6	-0.3533641	90.6	-0.3185935	90.6	-0.2913548	90.6	-0.3060995	90.6	-0.2785196	90.6	-0.2852219	90.6	-0.2960468
90.8	-0.3490461	90.8	-0.4159986	90.8	-0.3537388	90.8	-0.3284647	90.8	-0.2867493	90.8	-0.337429	90.8	-0.338179	90.8	-0.3516803	90.8	-0.2896839	90.8	-0.3493675	90.8	-0.3192163	90.8	-0.2891666	90.8	-0.3061447	90.8	-0.2741571	90.8	-0.2815189	90.8	-0.2977
91	-0.3387973	91	-0.4048643	91	-0.3414032	91	-0.3284634	91	-0.2825955	91	-0.3269786	91	-0.331185	91	-0.3481661	91	-0.2902234	91	-0.3531893	91	-0.3200238	91	-0.2918374	91	-0.305357	91	-0.2780268	91	-0.2864251	91	-0.2959006
91.2	-0.3270208	91.2	-0.3963538	91.2	-0.3353111	91.2	-0.3188234	91.2	-0.2737361	91.2	-0.3241768	91.2	-0.3219016	91.2	-0.3501286	91.2	-0.2935143	91.2	-0.3519297	91.2	-0.3199284	91.2	-0.2855275	91.2	-0.3076269	91.2	-0.2744584	91.2	-0.2851403	91.2	-0.292897
91.4	-0.3200906	91.4	-0.3890038	91.4	-0.3236612	91.4	-0.3033664	91.4	-0.2647692	91.4	-0.3129276	91.4	-0.3163457	91.4	-0.3447228	91.4	-0.2944829	91.4	-0.3526468	91.4	-0.3189447	91.4	-0.2884265	91.4	-0.300135	91.4	-0.2782594	91.4	-0.286073	91.4	-0.2922115
91.6	-0.3167091	91.6	-0.3846771	91.6	-0.3175882	91.6	-0.2997239	91.6	-0.2565892	91.6	-0.2986705	91.6	-0.3062158	91.6	-0.3444233	91.6	-0.2885039	91.6	-0.3497781	91.6	-0.3180332	91.6	-0.2836226	91.6	-0.3022599	91.6	-0.2734189	91.6	-0.2808076	91.6	-0.2943833
91.8	-0.3007477	91.8	-0.3718371	91.8	-0.304312	91.8	-0.2895358	91.8	-0.2466082	91.8	-0.2958651	91.8	-0.2943068	91.8	-0.3467422	91.8	-0.2872072	91.8	-0.3523516	91.8	-0.3193672	91.8	-0.2831061	91.8	-0.3017002	91.8	-0.27381	91.8	-0.2814497	91.8	-0.2932148
92	-0.2944292	92	-0.3599935	92	-0.3001749	92	-0.279853	92	-0.2382611	92	-0.2858537	92	-0.2882721	92	-0.3466116	92	-0.2911907	92	-0.3497143	92	-0.3159092	92	-0.2829508	92	-0.3023147	92	-0.2749307	92	-0.2840446	92	-0.2942414
92.2	-0.2848334	92.2	-0.3527276	92.2	-0.2883407	92.2	-0.2686874	92.2	-0.2316352	92.2	-0.279202	92.2	-0.2769199	92.2	-0.3448496	92.2	-0.2949197	92.2	-0.3494731	92.2	-0.3131797	92.2	-0.2854873	92.2	-0.3035662	92.2	-0.2712016	92.2	-0.2859801	92.2	-0.2923613
92.4	-0.2722598	92.4	-0.3470058	92.4	-0.2826332	92.4	-0.2589217	92.4	-0.2194774	92.4	-0.2729901	92.4	-0.2667812	92.4	-0.3473789	92.4	-0.288222	92.4	-0.3467584	92.4	-0.311523	92.4	-0.2783712	92.4	-0.3042612	92.4	-0.2735212	92.4	-0.2817381	92.4	-0.2894006
92.6	-0.2647171	92.6	-0.3348943	92.6	-0.2733053	92.6	-0.2525334	92.6	-0.2112673	92.6	-0.2576077	92.6	-0.2609007	92.6	-0.347616	92.6	-0.2856447	92.6	-0.3483829	92.6	-0.3174271	92.6	-0.2833445	92.6	-0.3028734	92.6	-0.2756111	92.6	-0.2831052	92.6	-0.2914732
92.8	-0.2581908	92.8	-0.3218489	92.8	-0.263034	92.8	-0.2428097	92.8	-0.1999993	92.8	-0.2512663	92.8	-0.2494354	92.8	-0.345905	92.8	-0.2891383	92.8	-0.3413763	92.8	-0.3147915	92.8	-0.287908	92.8	-0.3025874	92.8	-0.2717726	92.8	-0.2790204	92.8	-0.2885081
93	-0.2509643	93	-0.3143986	93	-0.2565448	93	-0.2386916	93	-0.1936106	93	-0.2401734	93	-0.2502229	93	-0.344751	93	-0.2887767	93	-0.3410082	93	-0.3121898	93	-0.2811272	93	-0.3014756	93	-0.2735885	93	-0.2787096	93	-0.290836
93.2	-0.2438416	93.2	-0.3078494	93.2	-0.2471591	93.2	-0.2258407	93.2	-0.1849294	93.2	-0.2336317	93.2	-0.2289823	93.2	-0.3445562	93.2	-0.2887149	93.2	-0.3453088	93.2	-0.3140509	93.2	-0.2835948	93.2	-0.2979136	93.2	-0.2728241	93.2	-0.2814828	93.2	-0.2915657
93.4	-0.2356972	93.4	-0.3004612	93.4	-0.2346394	93.4	-0.2181056	93.4	-0.1793149	93.4	-0.229653	93.4	-0.2261976	93.4	-0.3468288	93.4	-0.2875863	93.4	-0.3450542	93.4	-0.312354	93.4	-0.2796587	93.4	-0.2942947	93.4	-0.2683552	93.4	-0.275201	93.4	-0.2880768
93.6	-0.2228107	93.6	-0.2905193	93.6	-0.230337	93.6	-0.2105561	93.6	-0.1693756	93.6	-0.2191834	93.6	-0.2190224	93.6	-0.3400031	93.6	-0.2900284	93.6	-0.3488753	93.6	-0.3180248	93.6	-0.2831914	93.6	-0.300016	93.6	-0.2779457	93.6	-0.2798545	93.6	-0.2840872
93.8	-0.218775	93.8	-0.2778918	93.8	-0.2224165	93.8	-0.1994062	93.8	-0.1571183	93.8	-0.2096265	93.8	-0.2096388	93.8	-0.338723	93.8	-0.2837256	93.8	-0.3399855	93.8	-0.3135908	93.8	-0.2824851	93.8	-0.3003884	93.8	-0.2706237	93.8	-0.2762772	93.8	-0.2890117
94	-0.204948	94	-0.2678996	94	-0.2126247	94	-0.192825	94	-0.1534081	94	-0.1995567	94	-0.1955143	94	-0.3394846	94	-0.282127	94	-0.338597	94	-0.310329	94	-0.2759322	94	-0.298373	94	-0.2668838	94	-0.2760559	94	-0.2853627
94.2	-0.1950262	94.2	-0.2667616	94.2	-0.200983	94.2	-0.1810166	94.2	-0.1450061	94.2	-0.1927511	94.2	-0.1981295	94.2	-0.3450206	94.2	-0.2869489	94.2	-0.3464572	94.2	-0.3150153	94.2	-0.279582	94.2	-0.2988139	94.2	-0.2685706	94.2	-0.2778794	94.2	-0.2858033
94.4	-0.1891811	94.4	-0.2550512	94.4	-0.1965617	94.4	-0.1797405	94.4	-0.1357017	94.4	-0.18398	94.4	-0.1800531	94.4	-0.3385569	94.4	-0.2809759	94.4	-0.3435351	94.4	-0.3082059	94.4	-0.2736597	94.4	-0.2981201	94.4	-0.2689955	94.4	-0.2758673	94.4	-0.2836048
94.6	-0.1810128	94.6	-0.2484532	94.6	-0.1847786	94.6	-0.1697076	94.6	-0.1265817	94.6	-0.1737874	94.6	-0.1719155	94.6	-0.3408608	94.6	-0.2828119	94.6	-0.3398462	94.6	-0.3114177	94.6	-0.2772478	94.6	-0.2978831	94.6	-0.2695251	94.6	-0.2767838	94.6	-0.2858863
94.8	-0.1724885	94.8	-0.2361638	94.8	-0.1749241	94.8	-0.1562005	94.8	-0.1192427	94.8	-0.1654307	94.8	-0.1683815	94.8	-0.3397892	94.8	-0.2852984	94.8	-0.3378203	94.8	-0.3110279	94.8	-0.2809427	94.8	-0.3004599	94.8	-0.2674357	94.8	-0.2746928	94.8	-0.2861342
95	-0.1660458	95	-0.2312702	95	-0.1667951	95	-0.1551577	95	-0.109918	95	-0.1570705	95	-0.1601775	95	-0.3405959	95	-0.2847372	95	-0.3370869	95	-0.3129387	95	-0.2816102	95	-0.2960695	95	-0.2718481	95	-0.2803037	95	-0.2851787
95.2	-0.1552498	95.2	-0.2167922	95.2	-0.1617022	95.2	-0.1431652	95.2	-0.09547559	95.2	-0.1439278	95.2	-0.1541378	95.2	-0.3387915	95.2	-0.2849949	95.2	-0.3405655	95.2	-0.3100508	95.2	-0.2747414	95.2	-0.2934604	95.2	-0.2686384	95.2	-0.2758003	95.2	-0.2840868
95.4	-0.1493781	95.4	-0.2138362	95.4	-0.1505534	95.4	-0.134651	95.4	-0.08892307	95.4	-0.1383518	95.4	-0.1408385	95.4	-0.3352	95.41	-0.283898	95.41	-0.3385674	95.41	-0.3096068	95.41	-0.2732075	95.41	-0.2977296	95.41	-0.2693624	95.41	-0.2723658	95.41	-0.2841845
95.6	-0.1392339	95.6	-0.1989415	95.6	-0.146401	95.6	-0.1233392	95.6	-0.0836153	95.6	-0.1354296	95.6	-0.1334928	95.6	-0.3377665	95.6	-0.2814949	95.6	-0.3393911	95.6	-0.3110628	95.6	-0.2799138	95.6	-0.2974806	95.6	-0.2624902	95.6	-0.2736049	95.6	-0.2810521
95.8	-0.1324991	95.8	-0.193737	95.8	-0.138091	95.8	-0.1178454	95.8	-0.07979538	95.8	-0.1260373	95.8	-0.1285656	95.8	-0.3359529	95.8	-0.282194	95.8	-0.3408733	95.8	-0.3071857	95.8	-0.2737291	95.8	-0.2940662	95.8	-0.267168	95.8	-0.2753353	95.8	-0.2863056
96	-0.1199899	96	-0.1857458	96	-0.1282887	96	-0.1098794	96	-0.06597219	96	-0.1208971	96	-0.1177169	96	-0.3348027	96	-0.2806989	96	-0.3382676	96	-0.3062426	96	-0.2756581	96	-0.2958411	96	-0.266358	96	-0.2748293	96	-0.2819019
96.2	-0.1157151	96.2	-0.1785068	96.2	-0.1272984	96.2	-0.1039696	96.2	-0.06270479	96.2	-0.1115168	96.2	-0.1137858	96.2	-0.3361846	96.2	-0.2835935	96.2	-0.3373676	96.2	-0.3069018	96.2	-0.2757252	96.2	-0.2954744	96.2	-0.262625	96.2	-0.2750933	96.2	-0.2806582
96.4	-0.1049282	96.4	-0.1674713	96.4	-0.1139525	96.4	-0.09385785	96.4	-0.05475324	96.4	-0.1034487	96.4	-0.1004847	96.4	-0.3345349	96.4	-0.2816891	96.4	-0.3365348	96.4	-0.3032967	96.4	-0.27272	96.4	-0.2932557	96.4	-0.2607377	96.4	-0.2716715	96.4	-0.2809244
96.6	-0.09019539	96.6	-0.161649	96.6	-0.1025684	96.6	-0.08483984	96.6	-0.0442534	96.6	-0.09519939	96.6	-0.09438914	96.6	-0.3317671	96.6	-0.2785209	96.6	-0.3350227	96.6	-0.3051081	96.6	-0.2744152	96.6	-0.2885389	96.6	-0.2629014	96.6	-0.277017	96.6	-0.2828989
96.8	-0.08844248	96.8	-0.1543024	96.8	-0.09117699	96.8	-0.07651803	96.8	-0.03876615	96.8	-0.0869418	96.8	-0.07908688	96.8	-0.3346929	96.8	-0.2814986	96.8	-0.3370087	96.8	-0.3062562	96.8	-0.2752739	96.8	-0.294911	96.8	-0.2622168	96.8	-0.2700028	96.8	-0.281282
97	-0.07689797	97	-0.1460336	97	-0.08561568	97	-0.07555445	97	-0.0296962	97	-0.07358801	97	-0.07890479	97	-0.3337596	97	-0.2784312	97	-0.3341731	97	-0.3009077	97	-0.2735668	97	-0.2922557	97	-0.2611296	97	-0.2738676	97	-0.2824312
97.2	-0.07456371	97.2	-0.1398546	97.2	-0.07904151	97.2	-0.06041797	97.2	-0.02265071	97.2	-0.06873152	97.2	-0.06581852	97.2	-0.33395	97.2	-0.2752632	97.2	-0.3348539	97.2	-0.3082509	97.2	-0.2738349	97.2	-0.2934058	97.2	-0.2627048	97.2	-0.2647482	97.2	-0.2799564
97.4	-0.06448474	97.4	-0.1304885	97.4	-0.0737997	97.4	-0.05248382	97.4	-0.0139907	97.4	-0.0642324	97.4	-0.0649916	97.4	-0.3314309	97.4	-0.2797997	97.4	-0.3349671	97.4	-0.3058727	97.4	-0.2754397	97.4	-0.2927709	97.4	-0.2644899	97.4	-0.2679302	97.4	-0.2796503
97.6	-0.0601917	97.6	-0.1224386	97.6	-0.06490614	97.6	-0.04395132	97.6	-0.0034593	97.6	-0.05346235	97.6	-0.0548321	97.6	-0.3344684	97.6	-0.2775225	97.6	-0.3349466	97.6	-0.305537	97.6	-0.2700518	97.6	-0.2878526	97.6	-0.2650836	97.6	-0.2658536	97.6	-0.2758406
97.8	-0.0522677	97.8	-0.1137342	97.8	-0.05628448	97.8	-0.03675947	97.8	-0.00218037	97.8	-0.05031237	97.8	-0.04813674	97.8	-0.3312018	97.8	-0.2740638	97.8	-0.3346106	97.8	-0.3030964	97.8	-0.2733902	97.8	-0.288491	97.8	-0.2632847	97.8	-0.2650805	97.8	-0.2820137
98	-0.04456701	98	-0.103891	98	-0.04896016	98	-0.02912049	98	0.0069794	98	-0.04113721	98	-0.04230532	98	-0.3290352	98	-0.2761676	98	-0.3301628	98	-0.3034702	98	-0.2715869	98	-0.2940044	98	-0.2623491	98	-0.2652022	98	-0.2818155
98.2	-0.03454523	98.2	-0.09385263	98.2	-0.04129459	98.2	-0.021526	98.2	0.01145317	98.2	-0.03113286	98.2	-0.02814304	98.2	-0.3318554	98.2	-0.2726653	98.2	-0.3318454	98.2	-0.3042843	98.2	-0.2699482	98.2	-0.2888017	98.2	-0.2587028	98.2	-0.2707042	98.2	-0.2794481
98.4	-0.02546095	98.4	-0.09147332	98.4	-0.03372542	98.4	-0.0158691	98.4	0.02349154	98.4	-0.02741337	98.4	-0.01943151	98.4	-0.3268313	98.4	-0.2740321	98.4	-0.3338026	98.4	-0.2994339	98.4	-0.2673319	98.4	-0.2883586	98.4	-0.2612641	98.4	-0.2685256	98.4	-0.2777703
98.6	-0.0200907	98.6	-0.07635622	98.6	-0.02453447	98.6	-0.00755562	98.6	0.03121644	98.6	-0.01818423	98.6	-0.01672303	98.6	-0.3323449	98.6	-0.2731826	98.6	-0.3322005	98.6	-0.3038194	98.6	-0.270794	98.6	-0.2839316	98.6	-0.2589757	98.6	-0.2708615	98.6	-0.2798352
98.8	-0.01446877	98.8	-0.07520323	98.8	-0.01568676	98.8	-0.00262736	98.8	0.03630675	98.8	-0.00673588	98.8	-0.00580849	98.8	-0.3328063	98.8	-0.2742541	98.8	-0.3316147	98.8	-0.3044202	98.8	-0.2648549	98.8	-0.2871757	98.8	-0.256708	98.8	-0.263284	98.8	-0.2821181
99	-0.00308982	99	-0.06424845	99	-0.01305026	99	0.00772407	99	0.04743563	99	-0.00228276	99	-0.00092369	99	-0.3310234	99	-0.2727514	99	-0.3303115	99	-0.3010988	99	-0.2674674	99	-0.2865997	99	-0.2577364	99	-0.2634059	99	-0.2749622
99.2	0.00280114	99.2	-0.06464619	99.2	-0.00262202	99.2	0.01966067	99.2	0.05337508	99.2	0.005789	99.2	0.00899709	99.2	-0.3296434	99.2	-0.2764557	99.2	-0.3351973	99.2	-0.3050905	99.2	-0.2696002	99.2	-0.2893675	99.2	-0.2619823	99.2	-0.2639272	99.2	-0.2770175
99.4	0.01239356	99.4	-0.04807673	99.4	0.0061482	99.4	0.02437527	99.4	0.05536449	99.4	0.01274897	99.4	0.01333613	99.4	-0.3269913	99.4	-0.2741176	99.4	-0.3315039	99.4	-0.2984725	99.4	-0.2695978	99.4	-0.2851789	99.4	-0.2605018	99.4	-0.2642709	99.4	-0.2761037
99.6	0.01593989	99.6	-0.042736	99.6	0.01120479	99.6	0.02939649	99.6	0.06931964	99.6	0.02043055	99.6	0.01937704	99.6	-0.3286022	99.6	-0.2749315	99.6	-0.3284716	99.6	-0.2959774	99.6	-0.2673897	99.6	-0.2830624	99.6	-0.2579365	99.6	-0.2671355	99.6	-0.2712917
99.8	0.02527951	99.8	-0.03379574	99.8	0.02160217	99.8	0.03288626	99.8	0.07463587	99.8	0.02505114	99.8	0.02584414	99.8	-0.3228362	99.8	-0.2682278	99.8	-0.3302368	99.8	-0.2992295	99.8	-0.2717372	99.8	-0.2869313	99.8	-0.2583214	99.8	-0.2646269	99.8	-0.2733531
100	0.03059369	100	-0.02678128	100	0.02725278	100	0.04274096	100	0.07778881	100	0.03331076	100	0.03220246	100	-0.3292047	100	-0.277108	100	-0.3297603	100	-0.2992783	100	-0.2665049	100	-0.2872654	100	-0.2572509	100	-0.2645057	100	-0.268306
100.2	0.04185487	100.2	-0.01985532	100.2	0.03282041	100.2	0.05059954	100.2	0.08981554	100.2	0.0411161	100.2	0.04368398	100.2	-0.3281783	100.2	-0.2711262	100.2	-0.3289956	100.2	-0.2994153	100.2	-0.2664854	100.2	-0.2816032	100.2	-0.2552355	100.2	-0.2637526	100.2	-0.2779448
100.4	0.04633436	100.4	-0.00939692	100.4	0.04396367	100.4	0.05788242	100.4	0.09460173	100.4	0.04710763	100.4	0.05485236	100.4	-0.3315285	100.4	-0.276154	100.4	-0.3303208	100.4	-0.2993088	100.4	-0.2654442	100.4	-0.2857684	100.4	-0.2586685	100.4	-0.2662996	100.4	-0.2753864
100.6	0.05262142	100.6	-0.00499814	100.6	0.05048664	100.6	0.06121066	100.6	0.09649952	100.6	0.0532054	100.6	0.05843689	100.6	-0.3272629	100.6	-0.2722349	100.6	-0.3287713	100.6	-0.2974095	100.6	-0.2665152	100.6	-0.2848231	100.6	-0.2571336	100.6	-0.2634366	100.6	-0.2783752
100.8	0.05670279	100.8	-0.00053218	100.8	0.05359747	100.8	0.07430661	100.8	0.111494	100.8	0.06468019	100.8	0.06627763	100.8	-0.3255328	100.8	-0.2734183	100.8	-0.324772	100.8	-0.2956826	100.8	-0.2672015	100.8	-0.2836774	100.8	-0.252887	100.8	-0.2602443	100.8	-0.2762942
101	0.06786479	101	0.00930355	101	0.06073706	101	0.08149126	101	0.1149888	101	0.06980867	101	0.07383634	101	-0.3279414	101	-0.2715821	101	-0.3268448	101	-0.294695	101	-0.2650853	101	-0.281287	101	-0.2531705	101	-0.2587265	101	-0.277471
101.2	0.07310446	101.2	0.01433458	101.2	0.07279225	101.2	0.08323245	101.2	0.123199	101.2	0.07534171	101.2	0.07792573	101.2	-0.3267199	101.2	-0.2685878	101.2	-0.3237847	101.2	-0.2958885	101.2	-0.2643596	101.2	-0.2848026	101.2	-0.2540293	101.2	-0.2612835	101.2	-0.2749877
101.4	0.07942747	101.4	0.02051684	101.4	0.07199713	101.4	0.08743038	101.4	0.1282091	101.4	0.08077536	101.4	0.08609147	101.4	-0.3257574	101.4	-0.271721	101.4	-0.3265411	101.4	-0.2924661	101.4	-0.2630547	101.4	-0.2875776	101.4	-0.2538545	101.4	-0.2618669	101.4	-0.2738024
101.6	0.08823171	101.6	0.02522172	101.6	0.08468602	101.6	0.09857292	101.6	0.1374953	101.6	0.08588017	101.6	0.09204972	101.6	-0.3242666	101.6	-0.274285	101.6	-0.3275934	101.6	-0.2904328	101.6	-0.2636676	101.6	-0.2814488	101.6	-0.253422	101.6	-0.2608805	101.6	-0.27058
101.8	0.0990404	101.8	0.03149921	101.8	0.08537061	101.8	0.1039008	101.8	0.1413276	101.8	0.09291463	101.8	0.1002943	101.8	-0.3249861	101.8	-0.2706135	101.8	-0.3242662	101.8	-0.2976632	101.8	-0.2640896	101.8	-0.2851496	101.8	-0.2564701	101.8	-0.2635719	101.8	-0.2710427
102	0.1007484	102	0.0424338	102	0.098488	102	0.1097188	102	0.1482723	102	0.1049093	102	0.1088859	102	-0.3245328	102	-0.2680764	102	-0.3238989	102	-0.296921	102	-0.2593809	102	-0.2794467	102	-0.25293	102	-0.2595256	102	-0.2743824
102.2	0.10489	102.2	0.04799115	102.2	0.09953228	102.2	0.1206465	102.2	0.1587238	102.2	0.110831	102.2	0.1134246	102.2	-0.3214879	102.2	-0.2680477	102.2	-0.3236135	102.2	-0.2918034	102.2	-0.2584136	102.2	-0.2827816	102.2	-0.2524896	102.2	-0.2595066	102.2	-0.2712802
102.4	0.1120974	102.4	0.05489629	102.4	0.1089744	102.4	0.1218287	102.4	0.1618745	102.4	0.1174427	102.4	0.1172569	102.4	-0.3227124	102.4	-0.2680222	102.4	-0.3286219	102.4	-0.2930579	102.4	-0.2640533	102.4	-0.2783106	102.4	-0.2509308	102.4	-0.2635159	102.4	-0.2730271
102.62	0.1164167	102.62	0.05722534	102.62	0.1156802	102.62	0.1330652	102.62	0.1676943	102.62	0.1232585	102.62	0.1273167	102.62	-0.3243925	102.6	-0.2645655	102.6	-0.3232546	102.6	-0.2923993	102.6	-0.2630256	102.6	-0.2778786	102.6	-0.2506455	102.6	-0.2582584	102.6	-0.2697404
102.81	0.1250628	102.81	0.06930701	102.81	0.1213087	102.81	0.142112	102.81	0.1749453	102.81	0.1275324	102.81	0.1327862	102.81	-0.3237427	102.8	-0.2651666	102.8	-0.3232024	102.8	-0.2928278	102.8	-0.2596899	102.8	-0.2796438	102.8	-0.2484258	102.8	-0.2593011	102.8	-0.2753277
103	0.1295368	103	0.07697633	103	0.1241692	103	0.1434867	103	0.1782862	103	0.1310938	103	0.1383138	103	-0.3228395	103	-0.2645709	103	-0.3221311	103	-0.2937958	103	-0.2590859	103	-0.2780873	103	-0.2518511	103	-0.2618098	103	-0.2729168
103.2	0.1435704	103.2	0.08205657	103.2	0.1334384	103.2	0.1521683	103.2	0.1839972	103.2	0.1355917	103.2	0.1414982	103.2	-0.3233221	103.2	-0.2700434	103.2	-0.3268568	103.2	-0.2925268	103.2	-0.2596772	103.2	-0.2816509	103.2	-0.24943	103.2	-0.2562887	103.2	-0.2740175
103.4	0.1451887	103.4	0.08704732	103.4	0.1436206	103.4	0.1537829	103.4	0.1909918	103.4	0.1480118	103.4	0.1525329	103.4	-0.3205022	103.4	-0.2684584	103.4	-0.3215645	103.4	-0.2932427	103.4	-0.2604137	103.4	-0.2779373	103.4	-0.2513216	103.4	-0.2562965	103.4	-0.2713818
103.6	0.1530258	103.6	0.09486749	103.6	0.1506428	103.6	0.1627424	103.6	0.1956911	103.6	0.1524564	103.6	0.1571596	103.6	-0.3223201	103.6	-0.2630144	103.6	-0.3199549	103.6	-0.2912406	103.6	-0.2578518	103.6	-0.2768833	103.6	-0.2469866	103.6	-0.2577279	103.6	-0.268157
103.8	0.1564797	103.8	0.1048754	103.8	0.1584038	103.8	0.1660547	103.8	0.2086789	103.8	0.1599967	103.8	0.1657546	103.8	-0.3187159	103.8	-0.2639027	103.8	-0.3253645	103.8	-0.2875379	103.8	-0.2567406	103.8	-0.2830951	103.8	-0.2466958	103.8	-0.2591419	103.8	-0.2693478
104	0.1637778	104	0.107765	104	0.1604996	104	0.1739255	104	0.2078535	104	0.1666769	104	0.1679519	104	-0.3204234	104	-0.2660718	104	-0.3219709	104	-0.2891835	104	-0.2581919	104	-0.2811253	104	-0.2465688	104	-0.2588446	104	-0.2640391
104.2	0.1694463	104.2	0.1113871	104.2	0.1675776	104.2	0.1807682	104.2	0.2108038	104.2	0.1709441	104.2	0.1713941	104.2	-0.32202	104.2	-0.2632039	104.2	-0.3188569	104.2	-0.2906975	104.2	-0.2570125	104.2	-0.2773048	104.2	-0.2499067	104.2	-0.2562885	104.2	-0.2703298
104.4	0.1743784	104.4	0.1181555	104.4	0.173022	104.4	0.1904356	104.4	0.2210806	104.4	0.1744969	104.4	0.1771031	104.4	-0.3205672	104.4	-0.263736	104.4	-0.3193636	104.4	-0.2926006	104.4	-0.2559361	104.4	-0.2799587	104.4	-0.248289	104.4	-0.2554444	104.4	-0.2661702
104.6	0.1820351	104.6	0.1290048	104.6	0.1763158	104.6	0.1971972	104.6	0.2233615	104.6	0.1814762	104.6	0.1915445	104.6	-0.3164518	104.6	-0.2620579	104.6	-0.3190753	104.6	-0.2904407	104.6	-0.264573	104.6	-0.2791523	104.6	-0.2475691	104.6	-0.255422	104.6	-0.2670149
104.8	0.186775	104.8	0.1322795	104.8	0.1862003	104.8	0.1987369	104.8	0.2323529	104.8	0.1896017	104.8	0.1943376	104.8	-0.319411	104.8	-0.2623112	104.8	-0.3221768	104.8	-0.2904768	104.8	-0.2586196	104.8	-0.2732891	104.8	-0.2460098	104.8	-0.2530583	104.8	-0.2655506
105	0.1888286	105	0.1346281	105	0.1899331	105	0.201811	105	0.2385442	105	0.1979307	105	0.200886	105	-0.3210247	105.01	-0.2628985	105.01	-0.3204347	105.01	-0.2854525	105.01	-0.2582172	105.01	-0.2795559	105.01	-0.2430453	105.01	-0.2557964	105.01	-0.268235
105.2	0.1975143	105.2	0.139593	105.2	0.2011873	105.2	0.2071234	105.2	0.2413544	105.2	0.203303	105.2	0.2038714	105.2	-0.3210746	105.2	-0.2626638	105.2	-0.320691	105.2	-0.2925572	105.2	-0.2550467	105.2	-0.2761746	105.2	-0.2475393	105.2	-0.2487807	105.2	-0.2652184
105.4	0.2028694	105.4	0.1480938	105.4	0.2014899	105.4	0.215703	105.4	0.2496049	105.4	0.2093678	105.4	0.2109627	105.4	-0.3167558	105.4	-0.2637243	105.4	-0.3207257	105.4	-0.2876509	105.4	-0.2581715	105.4	-0.2778079	105.4	-0.241132	105.4	-0.2527888	105.4	-0.266792
105.6	0.2138943	105.6	0.1557007	105.6	0.2088496	105.6	0.2160742	105.6	0.2533161	105.6	0.2126157	105.6	0.2207511	105.6	-0.3163525	105.6	-0.2636711	105.6	-0.3254021	105.6	-0.2899885	105.6	-0.253906	105.6	-0.2732783	105.6	-0.2462423	105.6	-0.2561319	105.6	-0.2649889
105.8	0.215711	105.8	0.163179	105.8	0.2131107	105.8	0.2314123	105.8	0.2584602	105.8	0.2194515	105.8	0.2187425	105.8	-0.3167003	105.8	-0.2614852	105.8	-0.3203303	105.8	-0.2846518	105.8	-0.2564454	105.8	-0.2758207	105.8	-0.2446989	105.8	-0.2511223	105.8	-0.2652729
106	0.2217017	106	0.1665933	106	0.2195399	106	0.2319065	106	0.2663673	106	0.2270287	106	0.2286241	106	-0.3182623	106	-0.2601179	106	-0.3193481	106	-0.286077	106	-0.2588406	106	-0.2716299	106	-0.2459379	106	-0.2529664	106	-0.265451
106.2	0.2279989	106.2	0.1778038	106.2	0.2223068	106.2	0.2338641	106.2	0.2685658	106.2	0.227652	106.2	0.2309882	106.2	-0.3162889	106.2	-0.2597676	106.2	-0.3168408	106.2	-0.2812269	106.2	-0.258049	106.2	-0.2763169	106.2	-0.2486689	106.2	-0.2509513	106.2	-0.2650858
106.4	0.2314557	106.4	0.1749876	106.4	0.2344141	106.4	0.2426061	106.4	0.2784225	106.4	0.2326673	106.4	0.2391784	106.4	-0.314143	106.4	-0.2641079	106.4	-0.3185169	106.4	-0.2852708	106.4	-0.2532683	106.4	-0.2756565	106.4	-0.243935	106.4	-0.2535106	106.4	-0.2657861
106.6	0.2373894	106.6	0.1855239	106.6	0.2348133	106.6	0.2430368	106.6	0.2816178	106.6	0.2367375	106.6	0.244004	106.6	-0.3196237	106.6	-0.2594879	106.6	-0.3145839	106.6	-0.2881962	106.6	-0.249604	106.6	-0.2725	106.6	-0.2446832	106.6	-0.2523274	106.6	-0.2644176
106.8	0.2407792	106.8	0.1917485	106.8	0.2383791	106.8	0.2475543	106.8	0.2847296	106.8	0.2450729	106.8	0.24858	106.8	-0.3178527	106.8	-0.2585865	106.8	-0.3152883	106.8	-0.2840883	106.8	-0.2558378	106.8	-0.2731212	106.8	-0.2391104	106.8	-0.2515944	106.8	-0.2637002
107	0.2461036	107	0.1892974	107	0.2446727	107	0.2576421	107	0.2927428	107	0.2474492	107	0.2567554	107	-0.3164152	107	-0.2571336	107	-0.3133185	107	-0.2818787	107	-0.2534339	107	-0.2752053	107	-0.2426243	107	-0.2501923	107	-0.2617649
107.2	0.2555029	107.2	0.2024813	107.2	0.2539192	107.2	0.2639475	107.2	0.3006373	107.2	0.2525999	107.2	0.2558995	107.2	-0.313766	107.2	-0.2582513	107.2	-0.3187396	107.2	-0.2887968	107.2	-0.2490986	107.2	-0.2748401	107.2	-0.2407803	107.2	-0.2515625	107.2	-0.2627079
107.4	0.2547981	107.4	0.2082477	107.4	0.2552228	107.4	0.2696331	107.4	0.2978204	107.4	0.2548273	107.4	0.2636218	107.4	-0.3154285	107.4	-0.2595272	107.4	-0.3162727	107.4	-0.2842857	107.4	-0.2510367	107.4	-0.2755947	107.4	-0.2480001	107.4	-0.2496202	107.4	-0.2638163
107.6	0.2582203	107.6	0.2128383	107.6	0.2668633	107.6	0.2743109	107.6	0.3073376	107.6	0.263427	107.6	0.2698212	107.6	-0.3133192	107.6	-0.2611746	107.6	-0.3208137	107.6	-0.2846089	107.6	-0.2553208	107.6	-0.271275	107.6	-0.2385369	107.6	-0.2533385	107.6	-0.2591155
107.8	0.2655994	107.8	0.2136392	107.8	0.2694717	107.8	0.2816019	107.8	0.3096533	107.8	0.2689608	107.8	0.2748831	107.8	-0.3116759	107.8	-0.2578806	107.8	-0.3116212	107.8	-0.2845605	107.8	-0.247562	107.8	-0.2750825	107.8	-0.2419842	107.8	-0.2510812	107.8	-0.2586368
108	0.275785	108	0.2232185	108	0.2744414	108	0.2851016	108	0.3183473	108	0.2718296	108	0.2791436	108	-0.3138568	108	-0.2556872	108	-0.3138559	108	-0.2866524	108	-0.2502626	108	-0.2699783	108	-0.2412179	108	-0.2461589	108	-0.2614349
108.2	0.2764205	108.2	0.2269422	108.2	0.2761455	108.2	0.2922137	108.2	0.3231848	108.2	0.2851073	108.2	0.2863314	108.2	-0.316298	108.2	-0.2567415	108.2	-0.3112433	108.2	-0.2767971	108.2	-0.2501139	108.2	-0.273984	108.2	-0.2358244	108.2	-0.24591	108.2	-0.2590464
108.4	0.2849935	108.4	0.2326628	108.4	0.2804278	108.4	0.2929035	108.4	0.3252412	108.4	0.2863073	108.4	0.2889883	108.4	-0.3084996	108.4	-0.2559555	108.4	-0.3099196	108.4	-0.2799341	108.4	-0.250435	108.4	-0.2667043	108.4	-0.2428619	108.4	-0.2520091	108.4	-0.2603463
108.6	0.2859155	108.6	0.2332769	108.6	0.289344	108.6	0.2945773	108.6	0.3338265	108.6	0.2901574	108.6	0.2967883	108.6	-0.3117194	108.6	-0.2578257	108.6	-0.3119664	108.6	-0.2812888	108.6	-0.2520636	108.6	-0.2682278	108.6	-0.241704	108.6	-0.2479138	108.6	-0.2601492
108.8	0.2938572	108.8	0.244593	108.8	0.2910291	108.8	0.3044756	108.8	0.3349077	108.8	0.2984366	108.8	0.2966842	108.8	-0.3128666	108.8	-0.2536114	108.8	-0.3169201	108.8	-0.2786413	108.8	-0.2473609	108.8	-0.2701504	108.8	-0.2389767	108.8	-0.2464372	108.8	-0.2621015
109	0.2959073	109	0.2461743	109	0.2990071	109	0.3138421	109	0.3426383	109	0.2996872	109	0.3070363	109	-0.3119308	109	-0.2530458	109	-0.3118627	109	-0.2820719	109	-0.2455246	109	-0.2715122	109	-0.2379435	109	-0.2450675	109	-0.2609472
109.2	0.3012879	109.2	0.2520641	109.2	0.30406	109.2	0.3109925	109.2	0.3454996	109.2	0.3085361	109.2	0.3090005	109.2	-0.3120109	109.2	-0.2561177	109.2	-0.3072566	109.2	-0.2839432	109.2	-0.2518653	109.2	-0.2689971	109.2	-0.2412375	109.2	-0.2438042	109.2	-0.2598625
109.4	0.3079463	109.4	0.2611621	109.4	0.3088403	109.4	0.3171708	109.4	0.3501394	109.4	0.3108009	109.4	0.3086891	109.4	-0.3127936	109.4	-0.2587624	109.4	-0.3088319	109.4	-0.2794477	109.4	-0.2524096	109.4	-0.2639696	109.4	-0.2381354	109.4	-0.2446529	109.4	-0.2610158
109.6	0.3151896	109.6	0.2597796	109.6	0.3177414	109.6	0.3243884	109.6	0.3568622	109.6	0.3144782	109.6	0.3211974	109.6	-0.309054	109.6	-0.2549091	109.6	-0.3092055	109.6	-0.2820975	109.6	-0.2482316	109.6	-0.268432	109.6	-0.2347084	109.6	-0.2450143	109.6	-0.2617022
109.8	0.3192906	109.8	0.2713481	109.8	0.3178043	109.8	0.3301674	109.8	0.3587725	109.8	0.3197746	109.8	0.3233376	109.8	-0.3045285	109.8	-0.2543911	109.8	-0.3089318	109.8	-0.2748885	109.8	-0.246836	109.8	-0.2665157	109.8	-0.2396973	109.8	-0.2394243	109.8	-0.2593998
110	0.3255235	110	0.2743256	110	0.3237916	110	0.3365223	110	0.3673704	110	0.3242813	110	0.3280866	110	-0.3105118	110	-0.2527494	110	-0.3101442	110	-0.2795264	110	-0.2508078	110	-0.2719774	110	-0.2363572	110	-0.2464695	110	-0.2606417
110.2	0.3276276	110.2	0.2754284	110.2	0.3288689	110.2	0.3366634	110.2	0.3672257	110.2	0.3261487	110.2	0.3356815	110.2	-0.3036976	110.2	-0.2550891	110.2	-0.3107771	110.2	-0.282235	110.2	-0.24342	110.2	-0.2685506	110.2	-0.2342996	110.2	-0.2399105	110.2	-0.2616794
110.4	0.3291256	110.4	0.2785947	110.4	0.3314621	110.4	0.3484288	110.4	0.3758278	110.4	0.3330742	110.4	0.3411944	110.4	-0.3122986	110.4	-0.2560144	110.4	-0.3078269	110.4	-0.2725753	110.4	-0.2466178	110.4	-0.2668452	110.4	-0.2329739	110.4	-0.2404439	110.4	-0.2554162
110.6	0.3300025	110.6	0.2865068	110.6	0.3331695	110.6	0.3450653	110.6	0.3726716	110.6	0.33983	110.6	0.3447933	110.6	-0.3100714	110.6	-0.2561316	110.6	-0.3091826	110.6	-0.2773314	110.6	-0.2493551	110.6	-0.2627321	110.6	-0.2381488	110.6	-0.2431874	110.6	-0.2605668
110.8	0.3431725	110.8	0.2903652	110.8	0.3368827	110.8	0.3534497	110.8	0.3807285	110.8	0.3442818	110.8	0.3464524	110.8	-0.305926	110.8	-0.2503735	110.8	-0.3021791	110.8	-0.2803539	110.8	-0.2460472	110.8	-0.2652634	110.8	-0.2326299	110.8	-0.2433525	110.8	-0.2590306
111	0.3459519	111	0.2923616	111	0.3446343	111	0.3529873	111	0.3875477	111	0.3503063	111	0.3509011	111	-0.3121559	111	-0.2510083	111	-0.3085355	111	-0.2815932	111	-0.244908	111	-0.2681586	111	-0.2361692	111	-0.2433361	111	-0.2538486
111.2	0.3457513	111.2	0.3023982	111.2	0.3531421	111.2	0.3621038	111.2	0.3902153	111.2	0.3534712	111.2	0.351801	111.2	-0.3099943	111.2	-0.2508101	111.2	-0.3078684	111.2	-0.2801735	111.2	-0.242718	111.2	-0.2655912	111.2	-0.2357818	111.2	-0.2437439	111.2	-0.2595255
111.4	0.3484738	111.4	0.3043116	111.4	0.3546514	111.4	0.3650158	111.4	0.3926295	111.4	0.3519023	111.4	0.3628698	111.4	-0.3089185	111.4	-0.2527192	111.4	-0.3074086	111.4	-0.2812614	111.4	-0.2479638	111.4	-0.2677603	111.4	-0.2299217	111.4	-0.244189	111.4	-0.2576614
111.6	0.3600572	111.6	0.3065948	111.6	0.3579513	111.6	0.3656718	111.6	0.3998425	111.6	0.3644519	111.6	0.3642172	111.6	-0.3071705	111.6	-0.2484286	111.6	-0.3084576	111.6	-0.2795416	111.6	-0.2470867	111.6	-0.2711517	111.6	-0.2340359	111.6	-0.2344912	111.6	-0.2559712
111.8	0.3610555	111.8	0.3148032	111.8	0.3638032	111.8	0.3689784	111.8	0.3993988	111.8	0.3655664	111.8	0.3670321	111.8	-0.3105539	111.8	-0.248191	111.8	-0.3029478	111.8	-0.2744018	111.8	-0.2438717	111.8	-0.2652918	111.8	-0.2310878	111.8	-0.2429422	111.8	-0.2523552
112	0.3634618	112	0.3162809	112	0.3699429	112	0.3772826	112	0.4101972	112	0.3653548	112	0.3727296	112	-0.3090078	112	-0.2494513	112	-0.3090025	112	-0.2794075	112	-0.2483145	112	-0.2658076	112	-0.2382332	112	-0.2420639	112	-0.2575001
112.2	0.3680232	112.2	0.3218324	112.2	0.3679095	112.2	0.3771468	112.2	0.4119062	112.2	0.371354	112.2	0.3768215	112.2	-0.3069041	112.2	-0.2506935	112.2	-0.3046173	112.2	-0.2760058	112.2	-0.2410929	112.2	-0.261568	112.2	-0.231508	112.2	-0.2407515	112.2	-0.258482
112.4	0.3785799	112.4	0.3272962	112.4	0.3734706	112.4	0.3768672	112.4	0.4155559	112.4	0.3760416	112.4	0.3806122	112.4	-0.3063203	112.4	-0.2479865	112.4	-0.3018744	112.4	-0.2737092	112.4	-0.2431218	112.4	-0.2669359	112.4	-0.2318036	112.4	-0.2408514	112.4	-0.2572798
112.6	0.3728249	112.6	0.3258089	112.6	0.3839941	112.6	0.3848176	112.6	0.4166842	112.6	0.3827094	112.6	0.3878527	112.6	-0.304854	112.6	-0.2505294	112.6	-0.3067409	112.6	-0.2733214	112.6	-0.2423846	112.6	-0.2649975	112.6	-0.2316949	112.6	-0.2390894	112.6	-0.2554502
112.8	0.3854836	112.8	0.333004	112.8	0.3842961	112.8	0.3948868	112.8	0.4177756	112.8	0.3846407	112.8	0.3900864	112.8	-0.3011859	112.8	-0.2461247	112.8	-0.3019958	112.8	-0.2783771	112.8	-0.2390555	112.8	-0.261409	112.8	-0.2288255	112.8	-0.2415207	112.8	-0.255905
113	0.3834256	113	0.3377083	113	0.3933961	113	0.3967634	113	0.4253969	113	0.3891968	113	0.3924191	113	-0.3050219	113	-0.2496953	113	-0.3023889	113	-0.2731663	113	-0.2439636	113	-0.2665004	113	-0.2319278	113	-0.2359397	113	-0.2543888
113.2	0.3918642	113.2	0.3383921	113.2	0.3932906	113.2	0.39734	113.2	0.4274838	113.2	0.3943717	113.2	0.3949602	113.2	-0.3040111	113.2	-0.2497498	113.2	-0.3020717	113.2	-0.2731454	113.2	-0.2427377	113.2	-0.2613695	113.2	-0.2285216	113.2	-0.239766	113.2	-0.2522366
113.4	0.3943624	113.4	0.3418503	113.4	0.3928008	113.4	0.4060179	113.4	0.4342654	113.4	0.3965715	113.4	0.4037295	113.4	-0.3065542	113.4	-0.2461489	113.4	-0.3043162	113.4	-0.2750903	113.4	-0.2407173	113.4	-0.2561887	113.4	-0.2301513	113.4	-0.241446	113.4	-0.2524616
113.6	0.3990825	113.6	0.3501163	113.6	0.4051866	113.6	0.4076264	113.6	0.4403328	113.6	0.4016177	113.6	0.4053861	113.6	-0.3099934	113.6	-0.2457453	113.6	-0.3058864	113.6	-0.2740787	113.6	-0.2427859	113.6	-0.2577536	113.6	-0.2286314	113.6	-0.2429742	113.6	-0.2531121
113.8	0.4050635	113.8	0.3524002	113.8	0.4021876	113.8	0.4061337	113.8	0.4405153	113.8	0.40727	113.8	0.4088306	113.8	-0.3045832	113.8	-0.2477282	113.8	-0.3066524	113.8	-0.2733468	113.8	-0.2422832	113.8	-0.2640554	113.8	-0.2295947	113.8	-0.2381129	113.8	-0.2528471
114	0.4069651	114	0.3543226	114	0.4082425	114	0.4134838	114	0.4469896	114	0.4138575	114	0.4164056	114	-0.2992747	114	-0.2447667	114	-0.3028825	114	-0.27561	114	-0.2376401	114	-0.2574106	114	-0.2283066	114	-0.2376323	114	-0.2555863
114.2	0.4104253	114.2	0.3626674	114.2	0.4141053	114.2	0.4252042	114.2	0.4477936	114.2	0.4124289	114.2	0.4167023	114.2	-0.3009706	114.2	-0.2416344	114.2	-0.3001983	114.2	-0.2730915	114.2	-0.2404496	114.2	-0.262668	114.2	-0.2306044	114.2	-0.2418466	114.2	-0.2565334
114.4	0.4091859	114.4	0.3617077	114.4	0.414885	114.4	0.420808	114.4	0.4503518	114.4	0.4146564	114.4	0.4187256	114.4	-0.298267	114.4	-0.2440787	114.4	-0.3059643	114.4	-0.2737332	114.4	-0.2411903	114.4	-0.2584399	114.4	-0.2238336	114.4	-0.2386474	114.4	-0.2543927
114.6	0.4125641	114.6	0.3657046	114.6	0.4188879	114.6	0.428433	114.6	0.4578836	114.6	0.423256	114.6	0.425945	114.6	-0.3002985	114.61	-0.2447613	114.61	-0.3030028	114.61	-0.2737356	114.61	-0.2402944	114.61	-0.2573279	114.61	-0.2294173	114.61	-0.2420038	114.61	-0.2491445
114.8	0.4175493	114.8	0.3667891	114.8	0.4212482	114.8	0.4307146	114.8	0.4632185	114.8	0.4263827	114.8	0.4251313	114.8	-0.2993034	114.8	-0.2472152	114.8	-0.2995403	114.8	-0.2703879	114.8	-0.2358069	114.8	-0.2639275	114.8	-0.2277755	114.8	-0.235613	114.8	-0.2478845
115	0.4239435	115	0.379528	115	0.4294844	115	0.4359398	115	0.4638333	115	0.4288837	115	0.4346885	115	-0.2978702	115	-0.245196	115	-0.2994901	115	-0.26799	115	-0.2411145	115	-0.2576129	115	-0.2257821	115	-0.2376068	115	-0.2509257
115.2	0.4293197	115.2	0.3791766	115.2	0.4341409	115.2	0.4413379	115.2	0.4658832	115.2	0.4304346	115.2	0.4338493	115.2	-0.3013729	115.2	-0.2476419	115.2	-0.3030633	115.2	-0.2747086	115.2	-0.239129	115.2	-0.2606497	115.2	-0.2278943	115.2	-0.2368479	115.2	-0.2488738
115.4	0.4317219	115.4	0.383738	115.4	0.4316203	115.4	0.4391083	115.4	0.4712008	115.4	0.4329374	115.4	0.4351199	115.4	-0.301154	115.4	-0.2419803	115.4	-0.3007748	115.4	-0.275775	115.4	-0.2407635	115.4	-0.2593707	115.4	-0.2271753	115.4	-0.2339822	115.4	-0.2505456
115.6	0.4347143	115.6	0.3880098	115.6	0.4421337	115.6	0.4446746	115.6	0.4688287	115.6	0.4398724	115.6	0.4444563	115.6	-0.2927667	115.6	-0.2473266	115.6	-0.3027339	115.6	-0.2733264	115.6	-0.2372548	115.6	-0.2587413	115.6	-0.2234563	115.6	-0.2316197	115.6	-0.2460545
115.8	0.4396982	115.8	0.3924469	115.8	0.4384947	115.8	0.4518305	115.8	0.4809548	115.8	0.4406515	115.8	0.4473573	115.8	-0.3002377	115.8	-0.2454728	115.8	-0.2992176	115.8	-0.2689832	115.8	-0.2336545	115.8	-0.2611089	115.8	-0.2274527	115.8	-0.2360035	115.8	-0.2471055
116	0.4436222	116	0.3927177	116	0.4471225	116	0.4504869	116	0.4819674	116	0.4494983	116	0.4492588	116	-0.3001807	116	-0.238476	116	-0.2999001	116	-0.2664413	116	-0.2394826	116	-0.2564947	116	-0.2266462	116	-0.2305621	116	-0.2484193
116.2	0.4483145	116.2	0.3983945	116.2	0.4493482	116.2	0.4577055	116.2	0.4843584	116.2	0.4514722	116.2	0.4544024	116.2	-0.2982445	116.2	-0.2391804	116.2	-0.3005816	116.2	-0.2697438	116.2	-0.2400984	116.2	-0.2604945	116.2	-0.2252558	116.2	-0.2330901	116.2	-0.2487364
116.4	0.4511979	116.4	0.3986987	116.4	0.4551083	116.4	0.4646576	116.4	0.4885868	116.4	0.4558938	116.4	0.4555262	116.4	-0.3016382	116.4	-0.2479902	116.4	-0.29987	116.4	-0.2648694	116.4	-0.2410522	116.4	-0.2579569	116.4	-0.226465	116.4	-0.2322967	116.4	-0.2466003
116.6	0.4541408	116.6	0.4099815	116.6	0.457882	116.6	0.4621212	116.6	0.4911314	116.6	0.4564359	116.6	0.4654936	116.6	-0.2981631	116.6	-0.2399111	116.6	-0.2983094	116.6	-0.2732345	116.6	-0.2375091	116.6	-0.2582012	116.6	-0.2279359	116.6	-0.2376698	116.6	-0.2454767
116.8	0.4567232	116.8	0.4134032	116.8	0.4608749	116.8	0.4695937	116.8	0.4955034	116.8	0.4614081	116.8	0.4666067	116.8	-0.2977353	116.8	-0.2463711	116.8	-0.2981592	116.8	-0.2680141	116.8	-0.2397921	116.8	-0.2589844	116.8	-0.2221097	116.8	-0.2376054	116.8	-0.2464582
117	0.4581509	117	0.4126509	117	0.4645534	117	0.4746037	117	0.4965911	117	0.4641807	117	0.4712221	117	-0.2939898	117	-0.238081	117	-0.2982198	117	-0.2685247	117	-0.2334639	117	-0.2585756	117	-0.2248069	117	-0.2342219	117	-0.2469554
117.2	0.4612057	117.2	0.4152121	117.2	0.4687771	117.2	0.4711078	117.2	0.5030801	117.2	0.464992	117.2	0.4736515	117.2	-0.2968529	117.2	-0.2401072	117.2	-0.2959873	117.2	-0.2625046	117.2	-0.2329033	117.2	-0.2537211	117.2	-0.2259001	117.2	-0.2358889	117.2	-0.249674
117.4	0.4669577	117.4	0.4188716	117.4	0.4685454	117.4	0.4792496	117.4	0.5044736	117.4	0.4676578	117.4	0.4767133	117.4	-0.2966755	117.4	-0.2383614	117.4	-0.2987445	117.4	-0.2709735	117.4	-0.2367659	117.4	-0.2582301	117.4	-0.2237343	117.4	-0.23743	117.4	-0.2491062
117.6	0.4725749	117.6	0.4276125	117.6	0.4768287	117.6	0.4776466	117.6	0.5092042	117.6	0.4709907	117.6	0.4788099	117.6	-0.3006447	117.6	-0.2456027	117.6	-0.2996441	117.6	-0.2660756	117.6	-0.2399274	117.6	-0.2525518	117.6	-0.2214548	117.6	-0.2312112	117.6	-0.246756
117.8	0.4726632	117.8	0.4284105	117.8	0.4823564	117.8	0.4827461	117.8	0.5117337	117.8	0.4837217	117.8	0.4796444	117.8	-0.3007706	117.8	-0.2440219	117.8	-0.2943092	117.8	-0.26768	117.8	-0.2321714	117.8	-0.2560257	117.8	-0.2242267	117.8	-0.2339811	117.8	-0.2522006
118	0.4769979	118	0.4302814	118	0.4782277	118	0.4832369	118	0.5166166	118	0.4794861	118	0.4841103	118	-0.2949403	118	-0.2346495	118	-0.2964022	118	-0.2671272	118	-0.2380889	118	-0.2532477	118	-0.2224236	118	-0.2314233	118	-0.2490335
118.2	0.4775493	118.2	0.4375401	118.2	0.4831986	118.2	0.4891804	118.2	0.5167437	118.2	0.4825082	118.2	0.4855693	118.2	-0.2909904	118.2	-0.2387758	118.2	-0.2970687	118.2	-0.2643214	118.2	-0.234101	118.2	-0.2569527	118.2	-0.2213878	118.2	-0.2245968	118.2	-0.2448968
118.4	0.4817198	118.4	0.4348293	118.4	0.4910552	118.4	0.4907865	118.4	0.5186997	118.4	0.4894624	118.4	0.4909298	118.4	-0.2920311	118.4	-0.2402072	118.4	-0.3000793	118.4	-0.2648427	118.4	-0.2336067	118.4	-0.2535456	118.4	-0.2204039	118.4	-0.2298036	118.4	-0.2424215
118.6	0.4883852	118.6	0.4440796	118.6	0.4926345	118.6	0.5011311	118.6	0.5225096	118.6	0.487669	118.6	0.4990169	118.6	-0.2955815	118.6	-0.2404186	118.6	-0.2920826	118.6	-0.2642718	118.6	-0.2362939	118.6	-0.25702	118.6	-0.2205343	118.6	-0.2276786	118.6	-0.2477489
118.8	0.4827242	118.8	0.4394216	118.8	0.490833	118.8	0.4988122	118.8	0.5260507	118.8	0.490988	118.8	0.4991264	118.8	-0.2963402	118.8	-0.2397301	118.8	-0.2926638	118.8	-0.2608833	118.8	-0.2337863	118.8	-0.2573708	118.8	-0.2235511	118.8	-0.2301918	118.8	-0.2472863
119	0.4924787	119	0.4482462	119	0.502335	119	0.5072575	119	0.5339448	119	0.4973606	119	0.5035188	119	-0.2957448	119	-0.2373524	119	-0.2940611	119	-0.2696159	119	-0.2309597	119	-0.2523113	119	-0.2178706	119	-0.2299649	119	-0.2457178
119.2	0.4988037	119.2	0.4480884	119.2	0.5039046	119.2	0.508606	119.2	0.5312619	119.2	0.5030808	119.2	0.5045177	119.2	-0.2964107	119.2	-0.2367039	119.2	-0.2961768	119.2	-0.2646864	119.2	-0.235497	119.2	-0.2587834	119.2	-0.2217859	119.2	-0.2315459	119.2	-0.2462352
119.4	0.4979296	119.4	0.4506833	119.4	0.5030522	119.4	0.5114524	119.4	0.5373483	119.4	0.5068164	119.4	0.5114885	119.4	-0.2960614	119.4	-0.23806	119.4	-0.2974388	119.4	-0.2591884	119.4	-0.2312738	119.4	-0.2521619	119.4	-0.2215389	119.4	-0.2303461	119.4	-0.2469334
119.6	0.5045847	119.6	0.4565698	119.6	0.5091613	119.6	0.5176947	119.6	0.5377978	119.6	0.502919	119.6	0.5083981	119.6	-0.2948215	119.6	-0.2382224	119.6	-0.2962917	119.6	-0.2629077	119.6	-0.2305482	119.6	-0.2542856	119.6	-0.2196467	119.6	-0.2291581	119.6	-0.2461594
119.8	0.5096853	119.8	0.4580651	119.8	0.5110661	119.8	0.5192893	119.8	0.5448018	119.8	0.5092472	119.8	0.5165665	119.8	-0.2917244	119.8	-0.233534	119.8	-0.2940701	119.8	-0.2620773	119.8	-0.2333477	119.8	-0.251737	119.8	-0.2196208	119.8	-0.2257787	119.8	-0.2471931
120	0.5086229	120	0.4611665	120	0.5169089	120	0.5166996	120	0.5495401	120	0.514762	120	0.5166326	120	-0.2973054	120	-0.2358922	120	-0.289756	120	-0.2649515	120	-0.2293371	120	-0.2511417	120	-0.2187254	120	-0.2293906	120	-0.2475154
120.2	0.5078081	120.2	0.4657234	120.2	0.5180693	120.2	0.5237806	120.2	0.5435357	120.2	0.5200464	120.2	0.5228592	120.2	-0.2944509	120.2	-0.2370519	120.2	-0.2958408	120.2	-0.2641263	120.2	-0.2288184	120.2	-0.2504158	120.2	-0.2185193	120.2	-0.2254832	120.2	-0.2405734
120.4	0.5112602	120.4	0.4707454	120.4	0.5180653	120.4	0.5249004	120.4	0.551235	120.4	0.5189261	120.4	0.5256218	120.4	-0.2911206	120.4	-0.2364844	120.4	-0.2912482	120.4	-0.2623618	120.4	-0.2288247	120.4	-0.2509611	120.4	-0.2185633	120.4	-0.2300017	120.4	-0.2405154
120.6	0.5141765	120.6	0.4703774	120.6	0.5241741	120.6	0.5251555	120.6	0.5482837	120.6	0.5196581	120.6	0.5279958	120.6	-0.2946424	120.6	-0.2388438	120.6	-0.2895486	120.6	-0.2621567	120.6	-0.2322437	120.6	-0.2494383	120.6	-0.2163866	120.6	-0.2266174	120.6	-0.2422205
120.8	0.5153276	120.8	0.4776924	120.8	0.523699	120.8	0.5324828	120.8	0.5546362	120.8	0.524136	120.8	0.5289912	120.8	-0.2917317	120.8	-0.235078	120.8	-0.2944047	120.8	-0.2592014	120.8	-0.231186	120.8	-0.2515139	120.8	-0.2171592	120.8	-0.2279686	120.8	-0.2443968
121	0.5215687	121	0.47515	121	0.532081	121	0.5348197	121	0.5621806	121	0.5295865	121	0.5318202	121	-0.2923258	121	-0.2396456	121	-0.2877244	121	-0.2598612	121	-0.2286208	121	-0.2532667	121	-0.2147626	121	-0.2210558	121	-0.2442709
121.2	0.5261734	121.2	0.4835801	121.2	0.5317639	121.2	0.5324304	121.2	0.5634351	121.2	0.5319042	121.2	0.5379175	121.2	-0.293016	121.2	-0.2327714	121.2	-0.2910672	121.2	-0.2589187	121.2	-0.2299768	121.2	-0.2461102	121.2	-0.2194164	121.2	-0.2221332	121.2	-0.2440681
121.4	0.526461	121.4	0.4822307	121.4	0.5362149	121.4	0.5358892	121.4	0.5705234	121.4	0.5349488	121.4	0.5357055	121.4	-0.2917646	121.4	-0.2347276	121.4	-0.2920839	121.4	-0.2569153	121.4	-0.2301135	121.4	-0.2487633	121.4	-0.2198005	121.4	-0.2238352	121.4	-0.2423609
121.6	0.529959	121.6	0.4867793	121.6	0.5432059	121.6	0.5459532	121.6	0.5635998	121.6	0.5410379	121.6	0.5412038	121.6	-0.2921706	121.6	-0.2341445	121.6	-0.2895002	121.6	-0.2556134	121.6	-0.2290623	121.6	-0.24642	121.6	-0.2213776	121.6	-0.2305921	121.6	-0.2398112
121.8	0.531508	121.8	0.4884751	121.8	0.5393718	121.8	0.5416451	121.8	0.5716572	121.8	0.5433013	121.8	0.5413314	121.8	-0.2877253	121.8	-0.2351849	121.8	-0.2907396	121.8	-0.2593454	121.8	-0.2265351	121.8	-0.2467031	121.8	-0.2187003	121.8	-0.2268056	121.8	-0.2418223
122	0.5335743	122	0.4889553	122	0.5435985	122	0.549638	122	0.5699283	122	0.538044	122	0.5488672	122	-0.2968704	122	-0.2324601	122	-0.2919656	122	-0.2578364	122	-0.2287405	122	-0.2493481	122	-0.2130229	122	-0.2250563	122	-0.2447347
122.2	0.535531	122.2	0.4951088	122.2	0.549306	122.2	0.5517974	122.2	0.5757576	122.2	0.5425	122.2	0.5492215	122.2	-0.2940164	122.2	-0.2341429	122.2	-0.2892513	122.2	-0.2621135	122.2	-0.2305233	122.2	-0.2476657	122.2	-0.2144991	122.2	-0.2211318	122.2	-0.243962
122.4	0.54058	122.4	0.4943298	122.4	0.5474626	122.4	0.551156	122.4	0.5793129	122.4	0.5441498	122.4	0.5520915	122.4	-0.2888584	122.4	-0.2362908	122.4	-0.2924449	122.4	-0.2568199	122.4	-0.224738	122.4	-0.2464219	122.4	-0.2143731	122.4	-0.2273942	122.4	-0.2402465
122.6	0.5515004	122.6	0.5035017	122.6	0.5505949	122.6	0.5541326	122.6	0.5776352	122.6	0.5487263	122.6	0.5519927	122.6	-0.2910125	122.6	-0.2328477	122.6	-0.2839819	122.6	-0.2562103	122.6	-0.2274504	122.6	-0.2429017	122.6	-0.2165745	122.6	-0.2279431	122.6	-0.239528
122.83	0.5467774	122.83	0.5058179	122.83	0.5561188	122.83	0.5545046	122.83	0.5870261	122.83	0.5557929	122.83	0.5583964	122.83	-0.2861387	122.8	-0.2361861	122.8	-0.2860054	122.8	-0.2532189	122.8	-0.2259219	122.8	-0.2469327	122.8	-0.2192325	122.8	-0.22234	122.8	-0.2426528
123.01	0.5577173	123.01	0.5043031	123.01	0.5614807	123.01	0.5620539	123.01	0.5871984	123.01	0.5577717	123.01	0.5581567	123.01	-0.2910587	123	-0.2320739	123	-0.2881293	123	-0.2612019	123	-0.2308887	123	-0.2449162	123	-0.2150904	123	-0.2242535	123	-0.2376639
123.2	0.5533266	123.2	0.5064458	123.2	0.5620866	123.2	0.5653639	123.2	0.5911379	123.2	0.5595292	123.2	0.5675129	123.2	-0.2894707	123.2	-0.2323362	123.2	-0.2930061	123.2	-0.2550145	123.2	-0.2304847	123.2	-0.245134	123.2	-0.2160944	123.2	-0.2212577	123.2	-0.2403348
123.4	0.5562829	123.4	0.5151593	123.4	0.5659576	123.4	0.5665073	123.4	0.5972715	123.4	0.5623629	123.4	0.5656025	123.4	-0.2906792	123.4	-0.2341391	123.4	-0.2863588	123.4	-0.2576583	123.4	-0.2250528	123.4	-0.2487656	123.4	-0.2157103	123.4	-0.2241156	123.4	-0.2384221
123.6	0.5544338	123.6	0.5165988	123.6	0.5679395	123.6	0.5734198	123.6	0.5980847	123.6	0.5647816	123.6	0.564004	123.6	-0.2892821	123.6	-0.2328109	123.6	-0.2887244	123.6	-0.2577325	123.6	-0.2262602	123.6	-0.2439836	123.6	-0.2147201	123.6	-0.2222464	123.6	-0.2424157
123.8	0.5576313	123.8	0.5133157	123.8	0.5705326	123.8	0.5721281	123.8	0.5977007	123.8	0.5643079	123.8	0.568548	123.8	-0.288246	123.8	-0.2333371	123.8	-0.2884972	123.8	-0.2566546	123.8	-0.2191819	123.8	-0.2463219	123.8	-0.2121403	123.8	-0.2241508	123.8	-0.2413346
124	0.5619119	124	0.5188584	124	0.5714468	124	0.575191	124	0.594467	124	0.5648165	124	0.5716548	124	-0.2875145	124	-0.2294001	124	-0.2883378	124	-0.254836	124	-0.221619	124	-0.2445503	124	-0.2164129	124	-0.2200549	124	-0.2379314
124.2	0.5658467	124.2	0.5226948	124.2	0.5761324	124.2	0.5784071	124.2	0.6033682	124.2	0.5702189	124.2	0.5769555	124.2	-0.2857296	124.2	-0.2307668	124.2	-0.2886897	124.2	-0.2560201	124.2	-0.2276318	124.2	-0.2475921	124.2	-0.2132436	124.2	-0.221412	124.2	-0.24256
124.4	0.5669436	124.4	0.5196451	124.4	0.5829172	124.4	0.580029	124.4	0.6039926	124.4	0.5716758	124.4	0.5838897	124.4	-0.284791	124.4	-0.2295664	124.4	-0.2904585	124.4	-0.2557495	124.4	-0.2226911	124.4	-0.2461797	124.4	-0.2092577	124.4	-0.2207439	124.4	-0.2347783
124.6	0.5745069	124.6	0.5280809	124.6	0.5841233	124.6	0.5842581	124.6	0.6080322	124.6	0.5711195	124.6	0.5862724	124.6	-0.2895116	124.6	-0.2240385	124.6	-0.2861527	124.6	-0.255101	124.6	-0.2255452	124.6	-0.2470818	124.6	-0.2157371	124.6	-0.2210767	124.6	-0.2403908
124.8	0.5713235	124.8	0.5296482	124.8	0.5856867	124.8	0.5846866	124.8	0.6101915	124.8	0.5787272	124.8	0.5892513	124.8	-0.2894968	124.8	-0.2298795	124.8	-0.2848195	124.8	-0.2549522	124.8	-0.2267136	124.8	-0.24437	124.8	-0.2099065	124.8	-0.2192867	124.8	-0.2355697
125	0.5711806	125	0.5313389	125	0.5888356	125	0.5899921	125	0.6155553	125	0.5804843	125	0.585728	125	-0.2851463	125	-0.2289386	125	-0.2854497	125	-0.2545992	125	-0.2261878	125	-0.2461196	125	-0.2132629	125	-0.2203129	125	-0.2350983
125.2	0.5819561	125.2	0.5352505	125.2	0.5886664	125.2	0.5897205	125.2	0.6176975	125.2	0.5860572	125.2	0.5936536	125.2	-0.2845515	125.2	-0.2291933	125.2	-0.2832589	125.2	-0.2520335	125.2	-0.2221677	125.2	-0.2429147	125.2	-0.2124905	125.2	-0.2200601	125.2	-0.2370271
125.4	0.5822952	125.4	0.5398955	125.4	0.5939119	125.4	0.5942509	125.4	0.6135441	125.4	0.592267	125.4	0.5913379	125.4	-0.2882985	125.4	-0.2322285	125.4	-0.2859054	125.4	-0.2533667	125.4	-0.2218498	125.4	-0.2428484	125.4	-0.2134822	125.4	-0.219395	125.4	-0.236096
125.6	0.5861236	125.6	0.5380166	125.6	0.5934812	125.6	0.5947481	125.6	0.6189073	125.6	0.5851867	125.6	0.5943439	125.6	-0.2852032	125.6	-0.2302112	125.6	-0.2874342	125.6	-0.2576286	125.6	-0.2220623	125.6	-0.2426648	125.6	-0.2087958	125.6	-0.2197655	125.6	-0.2377304
125.8	0.5866541	125.8	0.5449812	125.8	0.5926521	125.8	0.59913	125.8	0.6199628	125.8	0.5935011	125.8	0.5976083	125.8	-0.2845574	125.8	-0.2292582	125.8	-0.2876717	125.8	-0.2558548	125.8	-0.2218258	125.8	-0.2403998	125.8	-0.2078289	125.8	-0.2210739	125.8	-0.2338363
126	0.5858444	126	0.5443387	126	0.5974863	126	0.6023041	126	0.6217009	126	0.5936018	126	0.6026295	126	-0.2862291	126	-0.2252068	126	-0.284468	126	-0.2491162	126	-0.2280879	126	-0.2468018	126	-0.2110098	126	-0.2169852	126	-0.2378738
126.2	0.5880231	126.2	0.5466781	126.2	0.6040311	126.2	0.6025047	126.2	0.626866	126.2	0.5989282	126.2	0.6009392	126.2	-0.2859845	126.2	-0.2294466	126.2	-0.2834599	126.2	-0.251475	126.2	-0.2206539	126.2	-0.2392365	126.2	-0.2080766	126.2	-0.2198116	126.2	-0.2371017
126.4	0.5993225	126.4	0.5514364	126.4	0.6016433	126.4	0.6082729	126.4	0.6332038	126.4	0.5946193	126.4	0.6043886	126.4	-0.2816508	126.4	-0.2315767	126.4	-0.2874595	126.4	-0.2503332	126.4	-0.2253323	126.4	-0.2393688	126.4	-0.2089137	126.4	-0.2206746	126.4	-0.2372188
126.6	0.5954641	126.6	0.5527788	126.6	0.6081229	126.6	0.6118452	126.6	0.6330147	126.6	0.5987231	126.6	0.6098593	126.6	-0.2830377	126.6	-0.2302915	126.6	-0.2792955	126.6	-0.2488128	126.6	-0.2191096	126.6	-0.243006	126.6	-0.2109056	126.6	-0.219339	126.6	-0.2349695
126.8	0.5917453	126.8	0.5571471	126.8	0.6102284	126.8	0.6121491	126.8	0.6327804	126.8	0.6050705	126.8	0.6123242	126.8	-0.2839885	126.8	-0.2287317	126.8	-0.2835948	126.8	-0.2513593	126.8	-0.2219496	126.8	-0.2396959	126.8	-0.2078072	126.8	-0.220855	126.8	-0.2382298
127	0.6009779	127	0.5593838	127	0.610988	127	0.6159015	127	0.6365796	127	0.6083659	127	0.6118429	127	-0.2834851	127	-0.2273037	127	-0.2834665	127	-0.2477206	127	-0.2213907	127	-0.2423455	127	-0.2083469	127	-0.2168146	127	-0.2299338
127.2	0.6001558	127.2	0.5584044	127.2	0.6141369	127.2	0.6157785	127.2	0.6437073	127.2	0.6052902	127.2	0.6147271	127.2	-0.2833589	127.2	-0.2280231	127.2	-0.280694	127.2	-0.247853	127.2	-0.2204992	127.2	-0.2403041	127.2	-0.2103415	127.2	-0.2186864	127.2	-0.2336856
127.4	0.6058512	127.4	0.5617644	127.4	0.6193999	127.4	0.617691	127.4	0.6379926	127.4	0.6123321	127.4	0.6182111	127.4	-0.2834869	127.4	-0.2299957	127.4	-0.2789398	127.4	-0.2487051	127.4	-0.2178607	127.4	-0.2409367	127.4	-0.2077318	127.4	-0.2159405	127.4	-0.2334326
127.6	0.6036112	127.6	0.563237	127.6	0.6205976	127.6	0.6129814	127.6	0.640377	127.6	0.6077423	127.6	0.6231892	127.6	-0.2850594	127.6	-0.2267123	127.6	-0.2815596	127.6	-0.2507031	127.6	-0.2228028	127.6	-0.245152	127.6	-0.2093542	127.6	-0.2158454	127.6	-0.2366304
127.8	0.6082265	127.8	0.5664289	127.8	0.6217671	127.8	0.6246672	127.8	0.6432567	127.8	0.616461	127.8	0.6247736	127.8	-0.2849568	127.8	-0.2280368	127.8	-0.2791271	127.8	-0.2529976	127.8	-0.2241272	127.8	-0.2408584	127.8	-0.2095318	127.8	-0.2132042	127.8	-0.2349841
128	0.608235	128	0.5735217	128	0.6231834	128	0.6232058	128	0.6519815	128	0.6194366	128	0.6236688	128	-0.2813978	128	-0.2227945	128	-0.2832401	128	-0.2490772	128	-0.2216502	128	-0.2381306	128	-0.2065985	128	-0.214289	128	-0.2341577
128.2	0.6121761	128.2	0.569298	128.2	0.6267057	128.2	0.6261592	128.2	0.6549724	128.2	0.6179547	128.2	0.6284463	128.2	-0.2794152	128.2	-0.2242064	128.2	-0.2801636	128.2	-0.2501905	128.2	-0.2177172	128.2	-0.2371921	128.2	-0.2059567	128.2	-0.2181636	128.2	-0.2355852
128.4	0.6152651	128.4	0.5759371	128.4	0.6282946	128.4	0.6295215	128.4	0.6517519	128.4	0.6226918	128.4	0.6259449	128.4	-0.2834793	128.4	-0.2236632	128.4	-0.2841431	128.4	-0.2424937	128.4	-0.2178011	128.4	-0.2356127	128.4	-0.2063061	128.4	-0.2143304	128.4	-0.2332382
128.6	0.617989	128.6	0.5771354	128.6	0.6275409	128.6	0.6335226	128.6	0.6525386	128.6	0.6277466	128.6	0.6318115	128.6	-0.2819633	128.6	-0.226616	128.6	-0.2817781	128.6	-0.2500202	128.6	-0.2190478	128.6	-0.23958	128.6	-0.2045314	128.6	-0.2122118	128.6	-0.2288492
128.8	0.6193691	128.8	0.5777724	128.8	0.6335034	128.8	0.6284549	128.8	0.6568921	128.8	0.6267152	128.8	0.6333528	128.8	-0.284546	128.8	-0.2242206	128.8	-0.2813331	128.8	-0.2519546	128.8	-0.2201293	128.8	-0.2370915	128.8	-0.2080999	128.8	-0.2152904	128.8	-0.2364373
129	0.6235324	129	0.5748618	129	0.6342512	129	0.6341357	129	0.654628	129	0.630614	129	0.6375047	129	-0.2794456	129	-0.2247498	129	-0.2814027	129	-0.2510952	129	-0.2178014	129	-0.2384854	129	-0.204496	129	-0.2138599	129	-0.232832
129.2	0.6286752	129.2	0.5805265	129.2	0.6369287	129.2	0.6374522	129.2	0.6656842	129.2	0.6288031	129.2	0.6364631	129.2	-0.2810139	129.2	-0.2270082	129.2	-0.2807856	129.2	-0.2515252	129.2	-0.216671	129.2	-0.2405721	129.2	-0.2058734	129.2	-0.2137978	129.2	-0.2343965
129.4	0.631702	129.4	0.5861626	129.4	0.639578	129.4	0.6417346	129.4	0.6639756	129.4	0.6320914	129.4	0.6425921	129.4	-0.2840811	129.4	-0.2250481	129.4	-0.2786015	129.4	-0.2499462	129.4	-0.2154111	129.4	-0.2414726	129.4	-0.204795	129.4	-0.2148328	129.4	-0.2336725
129.6	0.6263022	129.6	0.589517	129.6	0.6411461	129.6	0.6444755	129.6	0.668956	129.6	0.6360447	129.6	0.644527	129.6	-0.283344	129.6	-0.2217494	129.6	-0.2776689	129.6	-0.2483048	129.6	-0.2159356	129.6	-0.2353103	129.6	-0.209443	129.6	-0.2143712	129.6	-0.2330084
129.8	0.6342862	129.8	0.5934549	129.8	0.6425247	129.8	0.6422408	129.8	0.6678793	129.8	0.6387784	129.8	0.6444298	129.8	-0.281899	129.8	-0.2248178	129.8	-0.2804163	129.8	-0.2464276	129.8	-0.2177385	129.8	-0.2341485	129.8	-0.2071021	129.8	-0.2155883	129.8	-0.2345527
130	0.6358821	130	0.5929546	130	0.6508154	130	0.6450145	130	0.668682	130	0.640508	130	0.650814	130	-0.2833169	130	-0.2220975	130	-0.284146	130	-0.2481834	130	-0.2193142	130	-0.2346824	130	-0.2107755	130	-0.2142801	130	-0.2298454
130.2	0.6328601	130.2	0.5954092	130.2	0.6480801	130.2	0.6485758	130.2	0.6732916	130.2	0.6383165	130.2	0.6509365	130.2	-0.2826226	130.2	-0.2245688	130.2	-0.277058	130.2	-0.2440195	130.2	-0.2161946	130.2	-0.238298	130.2	-0.2052276	130.2	-0.2109179	130.2	-0.2305243
130.42	0.6381949	130.42	0.597249	130.42	0.6580257	130.42	0.6467364	130.42	0.6765303	130.42	0.6390428	130.42	0.6554682	130.42	-0.2781372	130.4	-0.2223936	130.4	-0.2765108	130.4	-0.2463772	130.4	-0.2160587	130.4	-0.2304672	130.4	-0.2002767	130.4	-0.2123629	130.4	-0.2294783
130.6	0.6391842	130.6	0.6001644	130.6	0.6491857	130.6	0.649347	130.6	0.6745239	130.6	0.6500391	130.6	0.654569	130.6	-0.2773021	130.6	-0.2208196	130.6	-0.2712482	130.6	-0.2472752	130.6	-0.2144178	130.6	-0.2340537	130.6	-0.2032428	130.6	-0.2142009	130.6	-0.2337045
130.8	0.6410651	130.8	0.6011985	130.8	0.654749	130.8	0.6561675	130.8	0.6772809	130.8	0.6503845	130.8	0.654152	130.8	-0.2792385	130.8	-0.2184297	130.8	-0.2728482	130.8	-0.2458592	130.8	-0.214647	130.8	-0.2413718	130.8	-0.2071776	130.8	-0.2128871	130.8	-0.2304909
131	0.6446339	131	0.6032293	131	0.6586275	131	0.6600203	131	0.6810231	131	0.6517366	131	0.656358	131	-0.2781305	131	-0.2192744	131	-0.2795585	131	-0.2442184	131	-0.2133927	131	-0.2374754	131	-0.1964798	131	-0.2130601	131	-0.2279722
131.2	0.6502208	131.2	0.6037526	131.2	0.6585735	131.2	0.6642293	131.2	0.6802105	131.2	0.6543656	131.2	0.6607575	131.2	-0.2805351	131.2	-0.2173838	131.2	-0.2735071	131.2	-0.2441149	131.2	-0.2117174	131.2	-0.2394937	131.2	-0.2032384	131.2	-0.2097931	131.2	-0.2308627
131.4	0.6408086	131.4	0.6099561	131.4	0.6639636	131.4	0.6579369	131.4	0.6852157	131.4	0.6554368	131.4	0.6635669	131.4	-0.2799752	131.4	-0.2194886	131.4	-0.2763212	131.4	-0.2456108	131.4	-0.2147019	131.4	-0.2343659	131.4	-0.2036388	131.4	-0.2144621	131.4	-0.2278198
131.6	0.6461635	131.6	0.6164863	131.6	0.6662967	131.6	0.665543	131.6	0.6826651	131.6	0.660907	131.6	0.6631123	131.6	-0.2755434	131.6	-0.2199893	131.6	-0.2771118	131.6	-0.2488875	131.6	-0.2132458	131.6	-0.23597	131.6	-0.2061568	131.6	-0.2105031	131.6	-0.2317459
131.8	0.6463398	131.8	0.6134638	131.8	0.6653798	131.8	0.6609814	131.8	0.6834514	131.8	0.6599346	131.8	0.6667279	131.8	-0.2751407	131.8	-0.2194917	131.8	-0.2765556	131.8	-0.2460256	131.8	-0.2151583	131.8	-0.2353242	131.8	-0.2011464	131.8	-0.2134383	131.8	-0.221682
132	0.6537053	132	0.6145027	132	0.6690258	132	0.6711246	132	0.690573	132	0.661091	132	0.6662165	132	-0.2759353	132	-0.221593	132	-0.2780969	132	-0.2491788	132	-0.2130991	132	-0.2371628	132	-0.2003364	132	-0.2165967	132	-0.230057
132.2	0.6569225	132.2	0.6183364	132.2	0.6701856	132.2	0.6690266	132.2	0.689306	132.2	0.6657313	132.2	0.6722314	132.2	-0.2806292	132.2	-0.2147427	132.2	-0.2716127	132.2	-0.245045	132.2	-0.2115801	132.2	-0.2338161	132.2	-0.1995959	132.2	-0.210062	132.2	-0.2291912
132.4	0.6586968	132.4	0.6186577	132.4	0.6673554	132.4	0.6711013	132.4	0.6923836	132.4	0.667548	132.4	0.670685	132.4	-0.2710787	132.4	-0.2220674	132.4	-0.2737305	132.4	-0.2447855	132.4	-0.214258	132.4	-0.2336234	132.4	-0.1986951	132.4	-0.2100755	132.4	-0.2292021
132.6	0.6631798	132.6	0.6201087	132.6	0.6778579	132.6	0.6714074	132.6	0.6967058	132.6	0.6675433	132.6	0.6692415	132.6	-0.2749116	132.6	-0.2173579	132.6	-0.2737753	132.6	-0.2433318	132.6	-0.2095255	132.6	-0.2312178	132.6	-0.2028996	132.6	-0.2105537	132.6	-0.2277138
132.8	0.6621622	132.8	0.6220351	132.8	0.6769262	132.8	0.6770249	132.8	0.6970208	132.8	0.6706495	132.8	0.6760182	132.8	-0.2764284	132.8	-0.2171152	132.8	-0.2718735	132.8	-0.2436996	132.8	-0.2127241	132.8	-0.2350748	132.8	-0.1993545	132.8	-0.2085372	132.8	-0.2272436
133	0.6673542	133	0.6231294	133	0.6823631	133	0.6774891	133	0.7012987	133	0.6705542	133	0.6783452	133	-0.277836	133	-0.2193339	133	-0.2731569	133	-0.2471106	133	-0.2128807	133	-0.2314508	133	-0.1981444	133	-0.2078116	133	-0.2328024
133.2	0.6653614	133.2	0.6247216	133.2	0.6799213	133.2	0.6757186	133.2	0.703197	133.2	0.6720107	133.2	0.680702	133.2	-0.2749438	133.2	-0.2176892	133.2	-0.2755924	133.2	-0.2438818	133.2	-0.2144564	133.2	-0.2344476	133.2	-0.1980485	133.2	-0.2081334	133.2	-0.2247296
133.4	0.6674253	133.4	0.6294292	133.4	0.6801224	133.4	0.678469	133.4	0.7014163	133.4	0.6757299	133.4	0.6785815	133.4	-0.2722059	133.4	-0.2165473	133.4	-0.2723033	133.4	-0.2386955	133.4	-0.2131769	133.4	-0.2304308	133.4	-0.2007445	133.4	-0.2048136	133.4	-0.2268984
133.6	0.6693523	133.6	0.6302206	133.6	0.6828388	133.6	0.6850045	133.6	0.7052699	133.6	0.6806512	133.6	0.6841837	133.6	-0.2756038	133.6	-0.2124892	133.6	-0.2742353	133.6	-0.2438629	133.6	-0.2105539	133.6	-0.228745	133.6	-0.1938081	133.6	-0.2026642	133.6	-0.2218793
133.8	0.6691861	133.8	0.6319818	133.8	0.6896331	133.8	0.6774703	133.8	0.7065898	133.8	0.6791422	133.8	0.6826378	133.8	-0.2786601	133.8	-0.2193176	133.8	-0.2749269	133.8	-0.2413883	133.8	-0.2120039	133.8	-0.231707	133.8	-0.2033137	133.8	-0.2053847	133.8	-0.2238951
134	0.671055	134	0.6340369	134	0.687498	134	0.6918263	134	0.7081962	134	0.6791007	134	0.6858248	134	-0.2701952	134	-0.220914	134	-0.2747413	134	-0.2427466	134	-0.213633	134	-0.2278068	134	-0.2015688	134	-0.203594	134	-0.2289651
134.2	0.6761798	134.2	0.6337577	134.2	0.6865742	134.2	0.6878211	134.2	0.7119306	134.2	0.6841453	134.2	0.6891907	134.2	-0.2736253	134.2	-0.2189131	134.2	-0.271228	134.2	-0.2387663	134.2	-0.2066867	134.2	-0.2278469	134.2	-0.1989586	134.2	-0.2021981	134.2	-0.2287048
134.4	0.6790792	134.4	0.6337016	134.4	0.6909338	134.4	0.6927187	134.4	0.7127373	134.4	0.6889803	134.4	0.693448	134.4	-0.2778382	134.4	-0.2171901	134.4	-0.2746527	134.4	-0.2426618	134.4	-0.2098926	134.4	-0.2289226	134.4	-0.1970617	134.4	-0.2073378	134.4	-0.2270138
134.6	0.6796272	134.6	0.639495	134.6	0.6933993	134.6	0.6945457	134.6	0.7135373	134.6	0.6874217	134.6	0.6984757	134.6	-0.2725016	134.6	-0.2139397	134.6	-0.273751	134.6	-0.2402464	134.6	-0.2065153	134.6	-0.2319063	134.6	-0.1998314	134.6	-0.2037409	134.6	-0.2282647
134.8	0.6810124	134.8	0.6439093	134.8	0.6963409	134.8	0.6915375	134.8	0.7133482	134.8	0.6917593	134.8	0.6955989	134.8	-0.2727839	134.8	-0.2163951	134.8	-0.270028	134.8	-0.2438106	134.8	-0.2081208	134.8	-0.23018	134.8	-0.1996137	134.8	-0.205216	134.8	-0.2240439
135	0.6799299	135	0.6475247	135	0.6971743	135	0.6938248	135	0.7187856	135	0.693196	135	0.6963647	135	-0.2756316	135	-0.214219	135	-0.2708175	135	-0.2352217	135	-0.2134112	135	-0.2330806	135	-0.1959921	135	-0.2063625	135	-0.2221583
135.2	0.6882522	135.2	0.6469697	135.2	0.7016948	135.2	0.700219	135.2	0.7248447	135.2	0.6901867	135.2	0.7015375	135.2	-0.2746098	135.2	-0.2125076	135.2	-0.2681782	135.2	-0.2399288	135.2	-0.2082569	135.2	-0.2309943	135.2	-0.1948997	135.2	-0.2122175	135.2	-0.2257459
135.4	0.6886782	135.4	0.647608	135.4	0.702189	135.4	0.7037531	135.4	0.7240674	135.4	0.6951119	135.4	0.7042085	135.4	-0.2742151	135.4	-0.2172692	135.4	-0.2718111	135.4	-0.2408156	135.4	-0.204446	135.4	-0.2314776	135.4	-0.200176	135.4	-0.20664	135.4	-0.2294596
135.6	0.6890293	135.6	0.6503686	135.6	0.7023512	135.6	0.7030588	135.6	0.7274731	135.6	0.6963157	135.6	0.7054952	135.6	-0.2734526	135.6	-0.2150568	135.6	-0.2699817	135.6	-0.2407372	135.6	-0.2109199	135.6	-0.2336383	135.6	-0.1986876	135.6	-0.20133	135.6	-0.2279444
135.8	0.689778	135.8	0.6489316	135.8	0.703408	135.8	0.7054896	135.8	0.7252641	135.8	0.6945255	135.8	0.7049274	135.8	-0.2707151	135.8	-0.2118786	135.8	-0.2753844	135.8	-0.2406166	135.8	-0.2068516	135.8	-0.2303621	135.8	-0.1964886	135.8	-0.2043468	135.8	-0.2286987
136	0.6938766	136	0.6553003	136	0.7100736	136	0.7067315	136	0.7254958	136	0.6991133	136	0.7108601	136	-0.2689612	136	-0.2146064	136	-0.2748972	136	-0.238548	136	-0.2061559	136	-0.2305306	136	-0.1986729	136	-0.2092235	136	-0.2250912
136.2	0.6910596	136.2	0.6530392	136.2	0.7057149	136.2	0.7125483	136.2	0.7317988	136.2	0.7054042	136.2	0.7064394	136.2	-0.2720056	136.2	-0.2121433	136.2	-0.2700775	136.2	-0.2388056	136.2	-0.209407	136.2	-0.2297318	136.2	-0.1959808	136.2	-0.2053993	136.2	-0.2244273
136.4	0.6964396	136.4	0.6568224	136.4	0.7072591	136.4	0.7145517	136.4	0.7306196	136.4	0.7065181	136.4	0.7133855	136.4	-0.270421	136.4	-0.2125487	136.4	-0.2674649	136.4	-0.2376339	136.4	-0.2087126	136.4	-0.2291265	136.4	-0.1946394	136.4	-0.2014658	136.4	-0.2218688
136.6	0.6968101	136.6	0.6584919	136.6	0.7147362	136.6	0.7155911	136.6	0.736005	136.6	0.7055887	136.6	0.709695	136.6	-0.2723777	136.6	-0.2098962	136.6	-0.270153	136.6	-0.2395788	136.6	-0.2047171	136.6	-0.2308072	136.6	-0.1931016	136.6	-0.2005762	136.6	-0.2228038
136.8	0.7018656	136.8	0.6617421	136.8	0.7152029	136.8	0.7162309	136.8	0.7365414	136.8	0.7097003	136.8	0.7128364	136.8	-0.2744127	136.8	-0.2138882	136.8	-0.268418	136.8	-0.2415008	136.8	-0.2080555	136.8	-0.2278733	136.8	-0.1947648	136.8	-0.2012872	136.8	-0.2202898
137	0.7029049	137	0.6598104	137	0.7140909	137	0.7115299	137	0.7372185	137	0.7071169	137	0.7165303	137	-0.270359	137	-0.2160078	137	-0.2693228	137	-0.2334765	137	-0.209205	137	-0.2241778	137	-0.1967034	137	-0.2048844	137	-0.2216559
137.2	0.7040931	137.2	0.6668523	137.2	0.7198679	137.2	0.7122778	137.2	0.7369336	137.2	0.7146045	137.2	0.7184141	137.2	-0.2688362	137.2	-0.2165526	137.2	-0.2644918	137.2	-0.2369754	137.2	-0.2121295	137.2	-0.2265334	137.2	-0.1922475	137.2	-0.2041003	137.2	-0.2236187
137.4	0.7047107	137.4	0.6642568	137.4	0.721431	137.4	0.7148988	137.4	0.7356445	137.4	0.7115507	137.4	0.7189189	137.4	-0.274986	137.4	-0.2122509	137.4	-0.2656005	137.4	-0.2392628	137.4	-0.2032255	137.4	-0.2278334	137.4	-0.1976305	137.4	-0.202618	137.4	-0.2227603
137.6	0.7060488	137.6	0.6681878	137.6	0.7181947	137.6	0.7212759	137.6	0.7374496	137.6	0.7146758	137.6	0.7196935	137.6	-0.2725592	137.6	-0.2118972	137.6	-0.2726558	137.6	-0.2366738	137.6	-0.2036401	137.6	-0.2233422	137.6	-0.191489	137.6	-0.2056037	137.6	-0.2258824
137.8	0.7079597	137.8	0.6757894	137.8	0.7223308	137.8	0.7255044	137.8	0.7459776	137.8	0.7171506	137.8	0.7248898	137.8	-0.2712482	137.8	-0.2092433	137.8	-0.2679343	137.8	-0.2326663	137.8	-0.2058126	137.8	-0.2281292	137.8	-0.1947814	137.8	-0.1983574	137.8	-0.2233807
138	0.7108881	138	0.6712269	138	0.7302448	138	0.7263092	138	0.7475003	138	0.7201102	138	0.7255017	138	-0.27022	138	-0.2096007	138	-0.2677815	138	-0.2333749	138	-0.2049908	138	-0.225339	138	-0.1902024	138	-0.2046732	138	-0.2220836
138.2	0.7067647	138.2	0.6700213	138.2	0.7284898	138.2	0.7262878	138.2	0.7464272	138.2	0.7227767	138.2	0.7307377	138.2	-0.2692053	138.2	-0.2104123	138.2	-0.2665655	138.2	-0.2343908	138.2	-0.2042987	138.2	-0.2289706	138.2	-0.1898	138.2	-0.2055715	138.2	-0.2196799
138.4	0.7110103	138.4	0.6744421	138.4	0.7275599	138.4	0.7303582	138.4	0.7476147	138.4	0.7213949	138.4	0.7251968	138.4	-0.2698264	138.4	-0.2103489	138.4	-0.2668341	138.4	-0.2326593	138.4	-0.2044995	138.4	-0.2241978	138.4	-0.1930749	138.4	-0.201874	138.4	-0.2250536
138.6	0.7154883	138.6	0.6744133	138.6	0.7315369	138.6	0.7298738	138.6	0.7525234	138.6	0.7266461	138.6	0.7333511	138.6	-0.2704063	138.6	-0.2079243	138.6	-0.2722105	138.6	-0.2335737	138.6	-0.2076221	138.6	-0.2265102	138.6	-0.189157	138.6	-0.1983499	138.6	-0.222647
138.8	0.7164263	138.8	0.6785772	138.8	0.7301545	138.8	0.733339	138.8	0.748934	138.8	0.7256534	138.8	0.7308854	138.8	-0.2650468	138.8	-0.2080391	138.8	-0.267503	138.8	-0.2377453	138.8	-0.2037801	138.8	-0.2239874	138.8	-0.1938592	138.8	-0.2008578	138.8	-0.2170334
139	0.718224	139	0.6797352	139	0.7364724	139	0.7299021	139	0.7559288	139	0.7289866	139	0.7271928	139	-0.2711603	139	-0.2068634	139	-0.2664155	139	-0.2362913	139	-0.2039033	139	-0.2233773	139	-0.1926718	139	-0.2036117	139	-0.2218893
139.2	0.7196891	139.2	0.6850117	139.2	0.7355409	139.2	0.7317164	139.2	0.7587404	139.2	0.7254443	139.2	0.7333122	139.2	-0.2692465	139.2	-0.2103933	139.2	-0.2682355	139.2	-0.2333892	139.2	-0.2058842	139.2	-0.2249157	139.2	-0.1899234	139.2	-0.2033014	139.2	-0.2176746
139.4	0.7211564	139.4	0.6814526	139.4	0.7375461	139.4	0.7327166	139.4	0.7540997	139.4	0.7281781	139.4	0.7374546	139.4	-0.2689072	139.4	-0.2079016	139.4	-0.2647658	139.4	-0.2384843	139.4	-0.2043379	139.4	-0.2247518	139.4	-0.1947183	139.4	-0.2049394	139.4	-0.2221375
139.6	0.7264441	139.6	0.6878064	139.6	0.7359416	139.6	0.7398746	139.6	0.7565302	139.6	0.7290409	139.6	0.7364824	139.6	-0.2696185	139.6	-0.2113906	139.6	-0.2652873	139.6	-0.2355439	139.6	-0.2051789	139.6	-0.2208806	139.6	-0.1937954	139.6	-0.2013555	139.6	-0.2177121
139.8	0.7294504	139.8	0.6808167	139.8	0.7422591	139.8	0.7384211	139.8	0.7622472	139.8	0.7336382	139.8	0.7407992	139.8	-0.2672547	139.8	-0.2121207	139.8	-0.2632311	139.8	-0.2325884	139.8	-0.2015505	139.8	-0.224024	139.8	-0.1913949	139.8	-0.1990627	139.8	-0.2162846
140	0.7254025	140	0.6849612	140	0.7449839	140	0.7416298	140	0.7690287	140	0.7364566	140	0.7472081	140	-0.2713106	140	-0.2066112	140	-0.2660977	140	-0.232064	140	-0.2056411	140	-0.2241117	140	-0.18831	140	-0.199356	140	-0.2226561
140.2	0.7292856	140.2	0.6937772	140.2	0.7510217	140.2	0.7446249	140.2	0.7641121	140.2	0.7365608	140.2	0.7389888	140.2	-0.2660844	140.2	-0.212374	140.2	-0.2651387	140.2	-0.2341207	140.2	-0.2001681	140.2	-0.2212207	140.2	-0.1878794	140.2	-0.195946	140.2	-0.2220127
140.4	0.7303112	140.4	0.6892564	140.4	0.7469865	140.4	0.7436158	140.4	0.7684633	140.4	0.7426747	140.4	0.7449765	140.4	-0.2654484	140.4	-0.2047451	140.4	-0.2616849	140.4	-0.235122	140.4	-0.2069996	140.4	-0.2196819	140.4	-0.1922526	140.4	-0.2007143	140.4	-0.220763
140.6	0.726544	140.6	0.6944606	140.6	0.751004	140.6	0.7434717	140.6	0.7632456	140.6	0.7398798	140.6	0.7476222	140.6	-0.2695245	140.6	-0.21135	140.6	-0.2630382	140.6	-0.2338135	140.6	-0.2013136	140.6	-0.2257447	140.6	-0.1880268	140.6	-0.1996038	140.6	-0.2213949
140.8	0.7372921	140.8	0.6972554	140.8	0.7524782	140.8	0.7468381	140.8	0.7736517	140.8	0.7406912	140.8	0.7489269	140.8	-0.2677	140.8	-0.2043131	140.8	-0.262203	140.8	-0.2273123	140.8	-0.1976633	140.8	-0.2220338	140.8	-0.1869688	140.8	-0.2004534	140.8	-0.2246609
141	0.7331734	141	0.6975403	141	0.7512442	141	0.7524043	141	0.7677094	141	0.7463387	141	0.749314	141	-0.2617345	141	-0.2075785	141	-0.2614774	141	-0.2352355	141	-0.2013745	141	-0.2225965	141	-0.1910258	141	-0.1989852	141	-0.221493
141.2	0.7390176	141.2	0.6975313	141.2	0.752664	141.2	0.7514712	141.2	0.7708082	141.2	0.7423931	141.2	0.7549682	141.2	-0.2659036	141.2	-0.208514	141.2	-0.2662051	141.2	-0.2304614	141.2	-0.1988365	141.2	-0.2203507	141.2	-0.1897218	141.2	-0.2003688	141.2	-0.2199819
141.4	0.7334496	141.4	0.7027456	141.4	0.7558064	141.4	0.7523588	141.4	0.7746258	141.4	0.7442776	141.4	0.756509	141.4	-0.2632708	141.4	-0.209445	141.4	-0.2614006	141.4	-0.2334315	141.4	-0.198638	141.4	-0.2241132	141.4	-0.188358	141.4	-0.2016267	141.4	-0.2198763
141.6	0.739629	141.6	0.7014884	141.6	0.7509516	141.6	0.7533363	141.6	0.7727284	141.6	0.7512068	141.6	0.7533563	141.6	-0.2671585	141.6	-0.2082744	141.6	-0.265768	141.6	-0.2306219	141.6	-0.204729	141.6	-0.2243466	141.6	-0.1925029	141.6	-0.1993801	141.6	-0.2192578
141.8	0.7382702	141.8	0.7057922	141.8	0.7598852	141.8	0.7526584	141.8	0.7746109	141.8	0.7481741	141.8	0.7580926	141.8	-0.2670472	141.8	-0.2055389	141.8	-0.2634209	141.8	-0.2295831	141.8	-0.1998337	141.8	-0.2237058	141.8	-0.1892883	141.8	-0.195058	141.8	-0.2194379
142	0.7445399	142	0.7090938	142	0.7577923	142	0.7584518	142	0.7740774	142	0.7560333	142	0.7595975	142	-0.2714506	142	-0.2089191	142	-0.2656062	142	-0.2306874	142	-0.2006163	142	-0.2182404	142	-0.1873133	142	-0.1977498	142	-0.2188621
142.2	0.7431934	142.2	0.7063149	142.2	0.7608305	142.2	0.7649374	142.2	0.7779415	142.2	0.7521235	142.2	0.7637383	142.2	-0.2619703	142.2	-0.2084305	142.2	-0.2631818	142.2	-0.2312268	142.2	-0.2016472	142.2	-0.2220102	142.2	-0.1856672	142.2	-0.2002067	142.2	-0.2149755
142.4	0.7440783	142.4	0.704826	142.4	0.7607799	142.4	0.7565988	142.4	0.7772258	142.4	0.7530426	142.4	0.7664833	142.4	-0.2667539	142.4	-0.2058246	142.4	-0.2590008	142.4	-0.2295267	142.4	-0.1947202	142.4	-0.2215969	142.4	-0.1905365	142.4	-0.1955642	142.4	-0.2206724
142.6	0.7487435	142.6	0.7093941	142.6	0.7657658	142.6	0.7598077	142.6	0.777862	142.6	0.7586286	142.6	0.7671105	142.6	-0.2624095	142.6	-0.202122	142.6	-0.2619156	142.6	-0.2307842	142.6	-0.195694	142.6	-0.2204823	142.6	-0.1877222	142.6	-0.1973426	142.6	-0.2181836
142.8	0.7491288	142.8	0.7075548	142.8	0.7703775	142.8	0.7599261	142.8	0.7847094	142.8	0.7601901	142.8	0.7643004	142.8	-0.2668962	142.8	-0.2068722	142.8	-0.262673	142.8	-0.2285875	142.8	-0.1991262	142.8	-0.2143572	142.8	-0.1860701	142.8	-0.1989701	142.8	-0.220292
143	0.7506526	143	0.7134452	143	0.7678769	143	0.7662617	143	0.7914449	143	0.7619457	143	0.767039	143	-0.2669297	143	-0.207228	143	-0.2600924	143	-0.2294156	143	-0.2020701	143	-0.2193347	143	-0.189439	143	-0.1975476	143	-0.2152687
143.2	0.7557919	143.2	0.7119934	143.2	0.7678705	143.2	0.7657648	143.2	0.7900286	143.2	0.7600764	143.2	0.7677863	143.2	-0.2645657	143.2	-0.2009895	143.2	-0.2610801	143.2	-0.2289893	143.2	-0.1976618	143.2	-0.221923	143.2	-0.1901342	143.2	-0.1981717	143.2	-0.216061
143.4	0.7527661	143.4	0.71408	143.4	0.7675599	143.4	0.7718977	143.4	0.7886726	143.4	0.7619689	143.4	0.7749388	143.4	-0.2651799	143.4	-0.2040678	143.4	-0.2599141	143.4	-0.2271881	143.4	-0.2009752	143.4	-0.2199107	143.4	-0.1828571	143.4	-0.1919838	143.4	-0.2175039
143.6	0.7573083	143.6	0.7146291	143.6	0.7711872	143.6	0.7716051	143.6	0.7876952	143.6	0.7634626	143.6	0.7679399	143.6	-0.2642479	143.6	-0.2068965	143.6	-0.2584597	143.6	-0.2284409	143.6	-0.1978298	143.6	-0.2178665	143.6	-0.1798085	143.6	-0.1915562	143.6	-0.2164679
143.8	0.7587093	143.8	0.719936	143.8	0.7749357	143.8	0.7717443	143.8	0.7957675	143.8	0.7644622	143.8	0.7737198	143.8	-0.2649915	143.8	-0.2043607	143.8	-0.2608646	143.8	-0.2319432	143.8	-0.1968375	143.8	-0.2192451	143.8	-0.1850923	143.8	-0.1970891	143.8	-0.2221783
144	0.7605699	144	0.7190018	144	0.7758812	144	0.7707631	144	0.7934757	144	0.7674492	144	0.777117	144	-0.2613046	144	-0.2045689	144	-0.2607332	144	-0.2268379	144	-0.1977888	144	-0.2184795	144	-0.184533	144	-0.1922583	144	-0.2142128
144.2	0.7617095	144.2	0.7216006	144.2	0.7768752	144.2	0.7697945	144.2	0.7944478	144.2	0.7656258	144.2	0.7728903	144.2	-0.2604075	144.2	-0.2030306	144.2	-0.2587827	144.2	-0.2302283	144.2	-0.2000013	144.2	-0.2253231	144.2	-0.1874026	144.2	-0.1927708	144.2	-0.2176518
144.4	0.7600557	144.4	0.7272554	144.4	0.7796407	144.4	0.7761867	144.4	0.8014315	144.4	0.7699872	144.4	0.7805978	144.4	-0.2656713	144.4	-0.200201	144.4	-0.2578704	144.4	-0.2268264	144.4	-0.2000857	144.4	-0.2187986	144.4	-0.1880453	144.4	-0.1907406	144.4	-0.21631
144.6	0.7628461	144.6	0.7249932	144.6	0.7839864	144.6	0.7798092	144.6	0.7998933	144.6	0.7690778	144.6	0.7770278	144.6	-0.2611126	144.6	-0.2021686	144.6	-0.2593881	144.6	-0.2273352	144.6	-0.1966438	144.6	-0.2147303	144.6	-0.1832231	144.6	-0.1924191	144.6	-0.2146135
144.8	0.7637157	144.8	0.7264741	144.8	0.7827077	144.8	0.7818797	144.8	0.7970735	144.8	0.7737719	144.8	0.7836061	144.8	-0.2614739	144.8	-0.204329	144.8	-0.2589518	144.8	-0.2324756	144.8	-0.1961986	144.8	-0.2200433	144.8	-0.1851787	144.8	-0.1946112	144.8	-0.2145203
145	0.7668164	145	0.7304867	145	0.7816033	145	0.7825135	145	0.8008404	145	0.7772493	145	0.7792165	145	-0.2616123	145	-0.2033765	145	-0.2531093	145	-0.2310791	145	-0.2012643	145	-0.2186549	145	-0.1811442	145	-0.1959059	145	-0.2193048
145.2	0.7672606	145.2	0.7274261	145.2	0.7876722	145.2	0.7854412	145.2	0.8031112	145.2	0.7712599	145.2	0.7821831	145.2	-0.2609003	145.2	-0.2077527	145.2	-0.2629472	145.2	-0.2271616	145.2	-0.1995943	145.2	-0.2171209	145.2	-0.1860498	145.2	-0.199104	145.2	-0.2123397
145.4	0.7686967	145.4	0.7313305	145.4	0.7871426	145.4	0.7849221	145.4	0.7994372	145.4	0.7752403	145.4	0.7816918	145.4	-0.2616263	145.4	-0.2017967	145.4	-0.2563657	145.4	-0.2262285	145.4	-0.1957893	145.4	-0.2177666	145.4	-0.1848155	145.4	-0.1899613	145.4	-0.2124456
145.6	0.7700925	145.6	0.7328876	145.6	0.7907224	145.6	0.7862291	145.6	0.8050592	145.6	0.7834872	145.6	0.7901221	145.6	-0.2610784	145.6	-0.2025631	145.6	-0.2594537	145.6	-0.2212972	145.6	-0.196672	145.6	-0.2159941	145.6	-0.1822644	145.6	-0.1949544	145.6	-0.2171897
145.8	0.7726389	145.8	0.7342489	145.8	0.7940335	145.8	0.7834109	145.8	0.8054878	145.8	0.7809523	145.8	0.78875	145.8	-0.2641858	145.8	-0.2021596	145.8	-0.2583284	145.8	-0.2254516	145.8	-0.1979844	145.8	-0.2161704	145.8	-0.1829346	145.8	-0.1951847	145.8	-0.2174138
146	0.7666317	146	0.7336491	146	0.7934136	146	0.7903751	146	0.810383	146	0.7838193	146	0.7899961	146	-0.2600028	146	-0.2015123	146	-0.2546947	146	-0.2255386	146	-0.1957312	146	-0.2150934	146	-0.1818741	146	-0.1897852	146	-0.2152762
146.2	0.7755032	146.2	0.7348763	146.2	0.7971463	146.2	0.7851976	146.2	0.8046688	146.2	0.7823277	146.2	0.7928653	146.2	-0.2656593	146.2	-0.200276	146.2	-0.2548526	146.2	-0.2288377	146.2	-0.1960495	146.2	-0.2178551	146.2	-0.1822749	146.2	-0.1906924	146.2	-0.215444
146.4	0.7779984	146.4	0.7436461	146.4	0.797858	146.4	0.7951096	146.4	0.8088498	146.4	0.788367	146.4	0.7932361	146.4	-0.2625139	146.4	-0.2010641	146.4	-0.2592809	146.4	-0.2225911	146.4	-0.1936174	146.4	-0.2158864	146.4	-0.1822772	146.4	-0.1907795	146.4	-0.2183725
146.6	0.7776498	146.6	0.7402989	146.6	0.7960631	146.6	0.7925612	146.6	0.8109121	146.6	0.7889575	146.6	0.7959048	146.6	-0.2629682	146.6	-0.1997348	146.6	-0.2565651	146.6	-0.2216314	146.6	-0.1922466	146.6	-0.2162096	146.6	-0.1829644	146.6	-0.1895683	146.6	-0.2179353
146.8	0.779295	146.8	0.7441022	146.8	0.7948658	146.8	0.7930219	146.8	0.8099717	146.8	0.7864859	146.8	0.7878686	146.8	-0.2576847	146.8	-0.1947993	146.8	-0.2590274	146.8	-0.2201968	146.8	-0.1967165	146.8	-0.2172623	146.8	-0.1829328	146.8	-0.191704	146.8	-0.2120309
147	0.7763413	147	0.7443003	147	0.8003505	147	0.7895094	147	0.8168764	147	0.7872932	147	0.7972592	147	-0.2608571	147	-0.2053711	147	-0.252913	147	-0.22194	147	-0.1968046	147	-0.2193609	147	-0.1798794	147	-0.1877257	147	-0.2134744
147.2	0.7783719	147.2	0.7406361	147.2	0.7948169	147.2	0.7931244	147.2	0.8138012	147.2	0.7887272	147.2	0.7955818	147.2	-0.2620455	147.2	-0.198113	147.2	-0.2579913	147.2	-0.2221693	147.2	-0.1951031	147.2	-0.2146317	147.2	-0.1795961	147.2	-0.1890205	147.2	-0.2104017
147.4	0.780053	147.4	0.7436476	147.4	0.8000445	147.4	0.8002913	147.4	0.8180816	147.4	0.7871629	147.4	0.8017612	147.4	-0.2588864	147.4	-0.1997257	147.4	-0.2562475	147.4	-0.2250789	147.4	-0.1915519	147.4	-0.2071681	147.4	-0.1796628	147.4	-0.1898667	147.4	-0.2125654
147.6	0.7870677	147.6	0.7513217	147.6	0.7975249	147.6	0.7993835	147.6	0.8189152	147.6	0.7937703	147.6	0.8032662	147.6	-0.2597127	147.6	-0.197022	147.6	-0.2544219	147.6	-0.2268241	147.6	-0.1913624	147.6	-0.2152366	147.6	-0.1823265	147.6	-0.1902619	147.6	-0.213571
147.8	0.7859427	147.8	0.7464854	147.8	0.8044024	147.8	0.7968647	147.8	0.8182679	147.8	0.7955785	147.8	0.8056484	147.8	-0.2575589	147.8	-0.1989578	147.8	-0.2543887	147.8	-0.2257452	147.8	-0.1935834	147.8	-0.2127653	147.8	-0.1848323	147.8	-0.1897123	147.8	-0.2123221
148	0.7871823	148	0.7506637	148	0.8072947	148	0.7979895	148	0.8251494	148	0.7952476	148	0.8038487	148	-0.2611557	148	-0.1974322	148	-0.2578921	148	-0.2221747	148	-0.1890912	148	-0.2076428	148	-0.1798182	148	-0.1893128	148	-0.2127256
148.2	0.7821685	148.2	0.7503755	148.2	0.8058958	148.2	0.8021482	148.2	0.8250111	148.2	0.7958669	148.2	0.8051919	148.2	-0.2617477	148.2	-0.1982172	148.2	-0.2567989	148.2	-0.21827	148.2	-0.1899792	148.2	-0.2125633	148.2	-0.1802251	148.2	-0.1865532	148.2	-0.2122982
148.4	0.7911167	148.4	0.7481348	148.4	0.8096619	148.4	0.8037469	148.4	0.8261612	148.4	0.8006899	148.4	0.804994	148.4	-0.2575292	148.4	-0.1940854	148.4	-0.2523833	148.4	-0.2226041	148.4	-0.1951421	148.4	-0.212415	148.4	-0.180567	148.4	-0.1864704	148.4	-0.2094478
148.61	0.7906282	148.61	0.7501032	148.61	0.8094305	148.61	0.8043197	148.61	0.8265939	148.61	0.8008027	148.61	0.8100423	148.61	-0.2593151	148.6	-0.1971879	148.6	-0.2533871	148.6	-0.2249757	148.6	-0.1875986	148.6	-0.2142086	148.6	-0.1785571	148.6	-0.1921122	148.6	-0.2096848
148.8	0.7940487	148.8	0.7551853	148.8	0.8112801	148.8	0.8003764	148.8	0.825935	148.8	0.800895	148.8	0.8072388	148.8	-0.2581417	148.8	-0.1998299	148.8	-0.2544031	148.8	-0.2260573	148.8	-0.1961062	148.8	-0.213561	148.8	-0.1779176	148.8	-0.1857162	148.8	-0.2158486
149	0.7856163	149	0.7556596	149	0.8174477	149	0.8064634	149	0.830081	149	0.8019877	149	0.8077677	149	-0.2567214	149	-0.1971877	149	-0.24697	149	-0.2238065	149	-0.1932314	149	-0.2119604	149	-0.1784223	149	-0.1867047	149	-0.2091827
149.2	0.7945849	149.2	0.7537628	149.2	0.816174	149.2	0.812741	149.2	0.8299794	149.2	0.8015357	149.2	0.8085901	149.2	-0.2585246	149.2	-0.1951954	149.2	-0.2516125	149.2	-0.2225317	149.2	-0.1913798	149.2	-0.2107578	149.2	-0.1831677	149.2	-0.1886006	149.2	-0.2089387
149.4	0.7974871	149.4	0.7590569	149.4	0.8168633	149.4	0.8084797	149.4	0.8298044	149.4	0.8076195	149.4	0.8148448	149.4	-0.2595966	149.4	-0.1956781	149.4	-0.2505083	149.4	-0.2205524	149.4	-0.1968249	149.4	-0.2141495	149.4	-0.1778932	149.4	-0.1866087	149.4	-0.2125875
149.6	0.7988861	149.6	0.7590145	149.6	0.8162143	149.6	0.8137941	149.6	0.8334296	149.6	0.8070146	149.6	0.8137842	149.6	-0.2555552	149.6	-0.196782	149.6	-0.2529954	149.6	-0.2212693	149.6	-0.1956774	149.6	-0.2112733	149.6	-0.1801199	149.6	-0.1847069	149.6	-0.2109694
149.8	0.7940909	149.8	0.7664844	149.8	0.8211772	149.8	0.8134894	149.8	0.8342973	149.8	0.8020766	149.8	0.8167688	149.8	-0.2572651	149.8	-0.1947025	149.8	-0.2541496	149.8	-0.221061	149.8	-0.1872164	149.8	-0.2090487	149.8	-0.1791652	149.8	-0.1882021	149.8	-0.2066605
150	0.7966648	150	0.7651523	150	0.8188672	150	0.8138019	150	0.8385156	150	0.8108693	150	0.8122632	150	-0.2580225	150	-0.1977927	150	-0.251617	150	-0.2181866	150	-0.1888027	150	-0.215614	150	-0.1723339	150	-0.1849855	150	-0.2106085
150.2	0.7983788	150.2	0.7637626	150.2	0.819415	150.2	0.8142264	150.2	0.8383203	150.2	0.8063155	150.2	0.8178128	150.2	-0.2590919	150.2	-0.1982862	150.2	-0.2532931	150.2	-0.2221193	150.2	-0.1926419	150.2	-0.2119594	150.2	-0.1765793	150.2	-0.18635	150.2	-0.2118815
150.4	0.8027304	150.4	0.7638313	150.4	0.8248806	150.4	0.8181043	150.4	0.8414878	150.4	0.8095935	150.4	0.822883	150.4	-0.2576788	150.4	-0.1965156	150.4	-0.2496916	150.4	-0.2204931	150.4	-0.1880269	150.4	-0.2099812	150.4	-0.1776399	150.4	-0.1855439	150.4	-0.2064846
150.6	0.801905	150.6	0.7673729	150.6	0.8235921	150.6	0.8169909	150.6	0.8337158	150.6	0.8057544	150.6	0.8234954	150.6	-0.2562332	150.6	-0.1978739	150.6	-0.2533584	150.6	-0.2224465	150.6	-0.1902485	150.6	-0.2066551	150.6	-0.1696947	150.6	-0.1864178	150.6	-0.2092107
150.8	0.8085322	150.8	0.7703425	150.8	0.8201346	150.8	0.818468	150.8	0.836402	150.8	0.8134392	150.8	0.8260701	150.8	-0.2595638	150.8	-0.1999907	150.8	-0.253405	150.8	-0.2187968	150.8	-0.1895841	150.8	-0.2115341	150.8	-0.1806399	150.8	-0.1878693	150.8	-0.2057653
151	0.8009352	151	0.7704081	151	0.8257167	151	0.824347	151	0.8424021	151	0.8188127	151	0.8190832	151	-0.2557372	151	-0.1949007	151	-0.2528373	151	-0.22221	151	-0.1896276	151	-0.2115481	151	-0.1750931	151	-0.1867099	151	-0.2094475
151.2	0.8093045	151.2	0.7689722	151.2	0.8251844	151.2	0.8244044	151.2	0.8412608	151.2	0.8164213	151.2	0.8305669	151.2	-0.2528933	151.2	-0.1957863	151.2	-0.2500737	151.2	-0.2245901	151.2	-0.1902002	151.2	-0.2146062	151.2	-0.1811702	151.2	-0.1864406	151.2	-0.2078936
151.4	0.8100051	151.4	0.77079	151.4	0.8279318	151.4	0.8218116	151.4	0.8465934	151.4	0.8163025	151.4	0.8306472	151.4	-0.2543617	151.4	-0.1960301	151.4	-0.2493109	151.4	-0.2204341	151.4	-0.1913301	151.4	-0.210224	151.4	-0.1773674	151.4	-0.1812358	151.4	-0.2028283
151.6	0.8099064	151.6	0.7757868	151.6	0.8288988	151.6	0.8269827	151.6	0.8437707	151.6	0.8182873	151.6	0.8298898	151.6	-0.2531529	151.6	-0.1929875	151.6	-0.2502452	151.6	-0.2185783	151.6	-0.189613	151.6	-0.2077167	151.6	-0.1774463	151.6	-0.1869789	151.6	-0.2103567
151.8	0.808857	151.8	0.7766424	151.8	0.8324903	151.8	0.8287335	151.8	0.8436094	151.8	0.8233318	151.8	0.8236094	151.8	-0.2541501	151.8	-0.1951046	151.8	-0.2428088	151.8	-0.2188044	151.8	-0.1871166	151.8	-0.2129334	151.8	-0.1733271	151.8	-0.1817701	151.8	-0.2101024
152	0.810043	152	0.7741029	152	0.830003	152	0.8269709	152	0.8499781	152	0.8254761	152	0.8394536	152	-0.2569315	152	-0.1890181	152	-0.2468148	152	-0.2203996	152	-0.1881641	152	-0.2105646	152	-0.1735633	152	-0.1862876	152	-0.2056252
152.2	0.8106385	152.2	0.7785915	152.2	0.8386836	152.2	0.8303902	152.2	0.8526517	152.2	0.8228456	152.2	0.8320559	152.2	-0.2527895	152.2	-0.1899793	152.2	-0.2513556	152.2	-0.2159639	152.2	-0.187979	152.2	-0.2089565	152.2	-0.1804538	152.2	-0.1856743	152.2	-0.2095506
152.4	0.8152716	152.4	0.7764487	152.4	0.8350142	152.4	0.8263798	152.4	0.8499778	152.4	0.8286965	152.4	0.8326389	152.4	-0.2540429	152.4	-0.1893328	152.4	-0.2546548	152.4	-0.2173971	152.4	-0.1872265	152.4	-0.2080633	152.4	-0.1761484	152.4	-0.1845168	152.4	-0.2069308
152.6	0.8168764	152.6	0.7830909	152.6	0.838383	152.6	0.8294843	152.6	0.8507912	152.6	0.8270196	152.6	0.8405469	152.6	-0.2526755	152.6	-0.1922369	152.6	-0.2459991	152.6	-0.2175217	152.6	-0.1869447	152.6	-0.2093481	152.6	-0.1732985	152.6	-0.1874782	152.6	-0.2036676
152.8	0.8176382	152.8	0.7869642	152.8	0.8389062	152.8	0.8279939	152.8	0.8526117	152.8	0.8271592	152.8	0.8364319	152.8	-0.2531627	152.8	-0.1920519	152.8	-0.2477465	152.8	-0.2150335	152.8	-0.1914271	152.8	-0.2086194	152.8	-0.171284	152.8	-0.1844552	152.8	-0.2054909
153	0.8193916	153	0.7804998	153	0.8382852	153	0.8356893	153	0.8531629	153	0.8286003	153	0.8391182	153	-0.2536075	153	-0.1917738	153	-0.2457998	153	-0.2207036	153	-0.187057	153	-0.2112213	153	-0.1727778	153	-0.1839925	153	-0.2064536
153.2	0.8147458	153.2	0.7790167	153.2	0.8427285	153.2	0.8357638	153.2	0.8544746	153.2	0.8327857	153.2	0.832835	153.2	-0.2507315	153.2	-0.19197	153.2	-0.2532607	153.2	-0.2200279	153.2	-0.1925557	153.2	-0.2088555	153.2	-0.177195	153.2	-0.1862441	153.2	-0.209999
153.4	0.8203654	153.4	0.7865418	153.4	0.8439319	153.4	0.8363788	153.4	0.8581148	153.4	0.8320031	153.4	0.8436223	153.4	-0.2517514	153.4	-0.1912898	153.4	-0.2488053	153.4	-0.2192969	153.4	-0.1856248	153.4	-0.2090862	153.4	-0.1753851	153.4	-0.187606	153.4	-0.2058233
153.6	0.8242457	153.6	0.7838624	153.6	0.846564	153.6	0.8399881	153.6	0.8537319	153.6	0.8340881	153.6	0.8439032	153.6	-0.2480861	153.6	-0.1922922	153.6	-0.2449793	153.6	-0.2189161	153.6	-0.1893832	153.6	-0.2120786	153.6	-0.1740704	153.6	-0.1823607	153.6	-0.207611
153.8	0.8262516	153.8	0.7924519	153.8	0.8452901	153.8	0.8393111	153.8	0.8586091	153.8	0.8325784	153.8	0.8405216	153.8	-0.2527148	153.8	-0.195244	153.8	-0.2426277	153.8	-0.2195346	153.8	-0.1881734	153.8	-0.2098141	153.8	-0.1762942	153.8	-0.1843662	153.8	-0.2057034
154	0.8245834	154	0.7918049	154	0.846817	154	0.8400078	154	0.858317	154	0.8343541	154	0.8373315	154	-0.2540853	154	-0.1917381	154	-0.2464245	154	-0.2171603	154	-0.184272	154	-0.2069383	154	-0.1684811	154	-0.1830069	154	-0.205349
154.2	0.8218853	154.2	0.7957484	154.2	0.8522153	154.2	0.8439451	154.2	0.8623062	154.2	0.8377414	154.2	0.8377974	154.2	-0.2534069	154.2	-0.1928078	154.2	-0.2462663	154.2	-0.2174844	154.2	-0.188382	154.2	-0.2054296	154.2	-0.1737832	154.2	-0.1872012	154.2	-0.2062725
154.4	0.8280119	154.4	0.7897848	154.4	0.8462088	154.4	0.8445359	154.4	0.8696588	154.4	0.838155	154.4	0.8460784	154.4	-0.2521097	154.4	-0.1890747	154.4	-0.2439669	154.4	-0.2177426	154.4	-0.187568	154.4	-0.206632	154.4	-0.1726421	154.4	-0.1794174	154.4	-0.1991972
154.6	0.8247818	154.6	0.7888164	154.6	0.8540958	154.6	0.8454319	154.6	0.8636724	154.6	0.8414082	154.6	0.8414977	154.6	-0.2533844	154.6	-0.1932454	154.6	-0.2487531	154.6	-0.2163228	154.6	-0.1844573	154.6	-0.2082728	154.6	-0.1735102	154.6	-0.1817372	154.6	-0.207997
154.8	0.8309171	154.8	0.7987011	154.8	0.8530295	154.8	0.8467023	154.8	0.8647895	154.8	0.8406139	154.8	0.8461214	154.8	-0.2504828	154.8	-0.1883036	154.8	-0.2495098	154.8	-0.21163	154.8	-0.1819827	154.8	-0.2061645	154.8	-0.1709365	154.8	-0.1804625	154.8	-0.2046636
155	0.8284076	155	0.7923157	155	0.8579597	155	0.8466108	155	0.8658121	155	0.842809	155	0.8474395	155	-0.2504359	155	-0.1901274	155	-0.2473624	155	-0.2162279	155	-0.1872681	155	-0.2045463	155	-0.1703601	155	-0.1849054	155	-0.2046695
155.2	0.8334194	155.2	0.798308	155.2	0.8526615	155.2	0.8451303	155.2	0.8677887	155.2	0.8426729	155.2	0.8494249	155.2	-0.2513742	155.2	-0.1880788	155.2	-0.251469	155.2	-0.2134875	155.2	-0.1827851	155.2	-0.2089979	155.2	-0.1715475	155.2	-0.1811007	155.2	-0.2073176
155.4	0.8324631	155.4	0.7965552	155.4	0.8566337	155.4	0.8465992	155.4	0.868239	155.4	0.8445697	155.4	0.8469337	155.4	-0.2528091	155.4	-0.1936043	155.4	-0.2452883	155.4	-0.2159813	155.4	-0.1862276	155.4	-0.2077749	155.4	-0.1700978	155.4	-0.1767592	155.4	-0.2077209
155.6	0.8356147	155.6	0.794559	155.6	0.8589961	155.6	0.848691	155.6	0.8699763	155.6	0.8386094	155.6	0.8491285	155.6	-0.2493668	155.6	-0.1882698	155.6	-0.2496301	155.6	-0.2114978	155.6	-0.1839118	155.6	-0.2078135	155.6	-0.1701596	155.6	-0.1791489	155.6	-0.2052306
155.8	0.8308713	155.8	0.7996634	155.8	0.8547227	155.8	0.8481464	155.8	0.8703959	155.8	0.8477411	155.8	0.8575837	155.8	-0.2578819	155.8	-0.1909272	155.8	-0.2471649	155.8	-0.2144359	155.8	-0.1832022	155.8	-0.2009877	155.8	-0.1724256	155.8	-0.1781121	155.8	-0.2081242
156	0.8375128	156	0.7994207	156	0.8586389	156	0.8542166	156	0.8680339	156	0.8470269	156	0.8558373	156	-0.2519541	156	-0.1917354	156	-0.2443201	156	-0.2133455	156	-0.1820054	156	-0.2071741	156	-0.1694999	156	-0.1782089	156	-0.2075521
156.2	0.8390576	156.2	0.8031648	156.2	0.862313	156.2	0.8525015	156.2	0.872438	156.2	0.852738	156.2	0.8524002	156.2	-0.2502099	156.2	-0.1931128	156.2	-0.2451496	156.2	-0.2156088	156.2	-0.183059	156.2	-0.2103502	156.2	-0.1755714	156.2	-0.1774752	156.2	-0.2065213
156.4	0.8415246	156.4	0.7993159	156.4	0.857487	156.4	0.8561642	156.4	0.875199	156.4	0.8489377	156.4	0.8593485	156.4	-0.2494251	156.4	-0.1876795	156.4	-0.2463344	156.4	-0.2160378	156.4	-0.1835582	156.4	-0.2058618	156.4	-0.1680231	156.4	-0.1820814	156.4	-0.2049073
156.6	0.8402867	156.6	0.805612	156.6	0.864323	156.6	0.8537555	156.6	0.8727719	156.6	0.849364	156.6	0.8593624	156.6	-0.249257	156.6	-0.1852038	156.6	-0.2426309	156.6	-0.2092785	156.6	-0.1837524	156.6	-0.2035322	156.6	-0.1673013	156.6	-0.1805336	156.6	-0.2025462
156.8	0.8401093	156.8	0.8049415	156.8	0.8685759	156.8	0.8565986	156.8	0.8770235	156.8	0.8548093	156.8	0.8665071	156.8	-0.2456138	156.8	-0.1895657	156.8	-0.2472587	156.8	-0.2146864	156.8	-0.1854663	156.8	-0.2052951	156.8	-0.1684351	156.8	-0.179743	156.8	-0.2079197
157	0.8430206	157	0.8087138	157	0.8644021	157	0.8588896	157	0.8778742	157	0.8513017	157	0.8628783	157	-0.2469608	157	-0.1908539	157	-0.2401791	157	-0.2113	157	-0.1834983	157	-0.2029627	157	-0.1660021	157	-0.1781282	157	-0.2027518
157.2	0.8470561	157.2	0.8088564	157.2	0.8642678	157.2	0.8603709	157.2	0.8804497	157.2	0.8534828	157.2	0.8604273	157.2	-0.2494348	157.2	-0.1886451	157.2	-0.2397602	157.2	-0.2130239	157.2	-0.1847728	157.2	-0.203628	157.2	-0.167206	157.2	-0.1765281	157.2	-0.2059526
157.4	0.8441202	157.4	0.8040211	157.4	0.8659522	157.4	0.8636267	157.4	0.8803797	157.4	0.8555073	157.4	0.8645514	157.4	-0.2494958	157.4	-0.1895462	157.4	-0.2429152	157.4	-0.2086015	157.4	-0.1834845	157.4	-0.204093	157.4	-0.169374	157.4	-0.1791208	157.4	-0.2065785
157.6	0.8443785	157.6	0.8055186	157.6	0.8661417	157.6	0.8622615	157.6	0.8829774	157.6	0.8572947	157.6	0.8636191	157.6	-0.2455027	157.6	-0.1857954	157.6	-0.2417497	157.6	-0.2119719	157.6	-0.1814096	157.6	-0.2020164	157.6	-0.1707729	157.6	-0.1813662	157.6	-0.2062159
157.8	0.8514131	157.8	0.812358	157.8	0.8680295	157.8	0.8609588	157.8	0.8859444	157.8	0.856944	157.8	0.8630011	157.8	-0.2477925	157.8	-0.1891332	157.8	-0.2454925	157.8	-0.2123085	157.8	-0.1786093	157.8	-0.2047293	157.8	-0.1678164	157.8	-0.1803043	157.8	-0.2010162
158	0.8481641	158	0.8113459	158	0.871671	158	0.8649133	158	0.8836213	158	0.8578601	158	0.8709314	158	-0.2443532	158	-0.1873047	158	-0.2436685	158	-0.2131838	158	-0.1791481	158	-0.2042879	158	-0.1677771	158	-0.1795324	158	-0.2053272
158.22	0.8518446	158.22	0.8145513	158.22	0.8725871	158.22	0.866507	158.22	0.8850679	158.22	0.8598753	158.22	0.8612074	158.22	-0.2495531	158.2	-0.1853244	158.2	-0.2422663	158.2	-0.2081486	158.2	-0.1837068	158.2	-0.2037774	158.2	-0.1701078	158.2	-0.1735637	158.2	-0.2026657
158.4	0.8481818	158.4	0.8159573	158.4	0.8694806	158.4	0.8648778	158.4	0.888149	158.4	0.8674362	158.4	0.8700442	158.4	-0.2502066	158.4	-0.1837982	158.4	-0.2441916	158.4	-0.2121945	158.4	-0.1805362	158.4	-0.2022567	158.4	-0.1686917	158.4	-0.1833081	158.4	-0.2044276
158.6	0.8531004	158.6	0.8180491	158.6	0.8741418	158.6	0.8661137	158.6	0.8898907	158.6	0.8613502	158.6	0.8719094	158.6	-0.248894	158.6	-0.1868052	158.6	-0.2438597	158.6	-0.2149364	158.6	-0.1799839	158.6	-0.2022821	158.6	-0.1680223	158.6	-0.1736928	158.6	-0.2011706
158.8	0.8500612	158.8	0.8136848	158.8	0.8759077	158.8	0.8702219	158.8	0.891273	158.8	0.8653921	158.8	0.871085	158.8	-0.2476737	158.8	-0.1900311	158.8	-0.243402	158.8	-0.2120873	158.8	-0.1815353	158.8	-0.1990163	158.8	-0.1661166	158.8	-0.1741833	158.8	-0.2005125
159	0.8566254	159	0.819575	159	0.876923	159	0.8689885	159	0.8900332	159	0.8648841	159	0.8737448	159	-0.2457686	159	-0.18749	159	-0.242794	159	-0.2122858	159	-0.1775375	159	-0.2017364	159	-0.1628199	159	-0.177133	159	-0.2044647
159.2	0.8535769	159.2	0.8159112	159.2	0.8742526	159.2	0.8727729	159.2	0.8893776	159.2	0.8656139	159.2	0.876057	159.2	-0.2448643	159.2	-0.1857317	159.2	-0.2366868	159.2	-0.2070458	159.2	-0.1797929	159.2	-0.2040916	159.2	-0.1703128	159.2	-0.1779229	159.2	-0.2004906
159.4	0.8547626	159.4	0.8177294	159.4	0.8745511	159.4	0.8719402	159.4	0.8858244	159.4	0.8662132	159.4	0.8748931	159.4	-0.2458273	159.4	-0.1899532	159.4	-0.2414756	159.4	-0.2100101	159.4	-0.1794267	159.4	-0.1987567	159.4	-0.1658308	159.4	-0.1768747	159.4	-0.2017849
159.6	0.8556744	159.6	0.8222942	159.6	0.8783152	159.6	0.8740698	159.6	0.8907009	159.6	0.8685096	159.6	0.8800275	159.6	-0.2508413	159.6	-0.1874156	159.6	-0.2403489	159.6	-0.205759	159.6	-0.1823893	159.6	-0.2029928	159.6	-0.1689905	159.6	-0.1764658	159.6	-0.2019671
159.8	0.8561425	159.8	0.8284565	159.8	0.8822329	159.8	0.8735853	159.8	0.8950491	159.8	0.8714586	159.8	0.8774768	159.8	-0.2489948	159.8	-0.1861534	159.8	-0.2435921	159.8	-0.2059517	159.8	-0.1835256	159.8	-0.2015516	159.8	-0.1693987	159.8	-0.1741729	159.8	-0.1968313
160	0.8576146	160	0.8255775	160	0.8837531	160	0.8740337	160	0.8949112	160	0.8692961	160	0.8797873	160	-0.243949	160	-0.1845951	160	-0.2366829	160	-0.2101355	160	-0.1806203	160	-0.1991987	160	-0.167583	160	-0.1753002	160	-0.2006615
160.2	0.8603817	160.2	0.8248839	160.2	0.8819536	160.2	0.8777752	160.2	0.8948401	160.2	0.8696026	160.2	0.8845767	160.2	-0.2485131	160.2	-0.18638	160.2	-0.2351963	160.2	-0.2099162	160.2	-0.179454	160.2	-0.1967813	160.2	-0.16765	160.2	-0.1721485	160.2	-0.204041
160.4	0.862842	160.4	0.8274602	160.4	0.8828969	160.4	0.8791501	160.4	0.8954545	160.4	0.8707134	160.4	0.8805396	160.4	-0.2468971	160.4	-0.1842683	160.4	-0.2390909	160.4	-0.2073327	160.4	-0.1790137	160.4	-0.2002304	160.4	-0.1673218	160.4	-0.1716329	160.4	-0.1986358
160.6	0.8614947	160.6	0.8222989	160.6	0.8849367	160.6	0.8817204	160.6	0.8984712	160.6	0.8725907	160.6	0.8812836	160.6	-0.2500677	160.6	-0.1844893	160.6	-0.2366287	160.6	-0.2063119	160.6	-0.1772629	160.6	-0.1987495	160.6	-0.1626271	160.6	-0.1775995	160.6	-0.2014403
160.8	0.8605838	160.8	0.8283399	160.8	0.8836418	160.8	0.8770669	160.8	0.9009001	160.8	0.8717333	160.8	0.8917794	160.8	-0.2455221	160.8	-0.1864326	160.8	-0.2382174	160.8	-0.204064	160.8	-0.1798871	160.8	-0.1988949	160.8	-0.1670471	160.8	-0.1722953	160.8	-0.2013782
161	0.859914	161	0.8278802	161	0.8866873	161	0.8826435	161	0.9028357	161	0.8745206	161	0.8884216	161	-0.2429241	161	-0.1829049	161	-0.2404437	161	-0.2076815	161	-0.1752826	161	-0.1977638	161	-0.1658519	161	-0.1717386	161	-0.20236
161.2	0.8654062	161.2	0.8289214	161.2	0.8869589	161.2	0.8839868	161.2	0.9016182	161.2	0.8746438	161.2	0.8884174	161.2	-0.2507447	161.2	-0.1833078	161.2	-0.2345319	161.2	-0.2094854	161.2	-0.1791624	161.2	-0.1986744	161.2	-0.164194	161.2	-0.1769906	161.2	-0.1993171
161.4	0.867498	161.4	0.8298596	161.4	0.8915226	161.4	0.8852121	161.4	0.9016391	161.4	0.8805698	161.4	0.8823408	161.4	-0.2456094	161.4	-0.1845518	161.4	-0.2393437	161.4	-0.2061233	161.4	-0.1756766	161.4	-0.2027804	161.4	-0.1627751	161.4	-0.1732632	161.4	-0.2005693
161.6	0.8691075	161.6	0.8313946	161.6	0.8892642	161.6	0.8888668	161.6	0.9028082	161.6	0.8774767	161.6	0.8891924	161.6	-0.2481841	161.6	-0.18573	161.6	-0.2388083	161.6	-0.2038713	161.6	-0.17792	161.6	-0.200526	161.6	-0.1704437	161.6	-0.1747776	161.6	-0.1990988
161.8	0.8728643	161.8	0.833292	161.8	0.8893827	161.8	0.8866438	161.8	0.9024305	161.8	0.8810462	161.8	0.8874615	161.8	-0.2446374	161.8	-0.1880357	161.8	-0.2404829	161.8	-0.208976	161.8	-0.1810205	161.8	-0.1972742	161.8	-0.1612228	161.8	-0.177564	161.8	-0.2003437
162	0.8714805	162	0.8337404	162	0.8928292	162	0.8871313	162	0.9010178	162	0.8832585	162	0.8857636	162	-0.2448451	162	-0.1781064	162	-0.235854	162	-0.2063862	162	-0.1789834	162	-0.1998447	162	-0.1624635	162	-0.1759011	162	-0.2009536
162.2	0.870559	162.2	0.837249	162.2	0.8904777	162.2	0.8896416	162.2	0.9075446	162.2	0.8829533	162.2	0.8957865	162.2	-0.2454915	162.2	-0.185749	162.2	-0.2402015	162.2	-0.2104421	162.2	-0.178636	162.2	-0.2014416	162.2	-0.1652558	162.2	-0.1719808	162.2	-0.1915453
162.4	0.87176	162.4	0.8373881	162.4	0.8967154	162.4	0.8922643	162.4	0.9080892	162.4	0.8797454	162.4	0.8916104	162.4	-0.2479759	162.4	-0.1791844	162.4	-0.2362682	162.4	-0.208728	162.4	-0.1787273	162.4	-0.197836	162.4	-0.1623669	162.4	-0.1764433	162.4	-0.1987569
162.6	0.8726333	162.6	0.8404602	162.6	0.8950471	162.6	0.8907058	162.6	0.9078884	162.6	0.8889777	162.6	0.8972433	162.6	-0.2431271	162.6	-0.1830008	162.6	-0.2379754	162.6	-0.2078621	162.6	-0.1767403	162.6	-0.1980876	162.6	-0.161715	162.6	-0.1690599	162.6	-0.202646
162.8	0.8741643	162.8	0.837197	162.8	0.8987408	162.8	0.8885565	162.8	0.9088649	162.8	0.8870407	162.8	0.8928882	162.8	-0.2406481	162.8	-0.1802833	162.8	-0.2384208	162.8	-0.2077964	162.8	-0.1773619	162.8	-0.1953115	162.8	-0.1591449	162.8	-0.1729158	162.8	-0.1956187
163	0.8748099	163	0.8431559	163	0.9043028	163	0.8943319	163	0.9068748	163	0.8895258	163	0.8945789	163	-0.2403778	163	-0.1791259	163	-0.2367475	163	-0.2073357	163	-0.1772985	163	-0.1999818	163	-0.1670148	163	-0.1704369	163	-0.1955283
163.2	0.8786079	163.2	0.8453825	163.2	0.8967996	163.2	0.8894124	163.2	0.9111238	163.2	0.8915929	163.2	0.8974013	163.2	-0.2399366	163.2	-0.1817216	163.2	-0.238201	163.2	-0.2050876	163.2	-0.18127	163.2	-0.1982007	163.2	-0.1598712	163.2	-0.1736074	163.2	-0.2002216
163.4	0.8802723	163.4	0.8392553	163.4	0.9035174	163.4	0.8945792	163.4	0.9131809	163.4	0.883594	163.4	0.8966208	163.4	-0.2433583	163.4	-0.1773668	163.4	-0.2333656	163.4	-0.2022111	163.4	-0.1754596	163.4	-0.1957558	163.4	-0.1645237	163.4	-0.1724084	163.4	-0.1973689
163.6	0.8756915	163.6	0.8423594	163.6	0.903478	163.6	0.8964486	163.6	0.9147871	163.6	0.8910406	163.6	0.898353	163.6	-0.2415272	163.6	-0.1834693	163.6	-0.2348682	163.6	-0.2052403	163.6	-0.1762079	163.6	-0.1939213	163.6	-0.1619992	163.6	-0.16904	163.6	-0.1991384
163.8	0.8767918	163.8	0.8435588	163.8	0.9055066	163.8	0.8968138	163.8	0.9125718	163.8	0.892607	163.8	0.9026517	163.8	-0.2462132	163.8	-0.1886663	163.8	-0.2328956	163.8	-0.2043847	163.8	-0.1775495	163.8	-0.1952088	163.8	-0.1655661	163.8	-0.1720355	163.8	-0.1987175
164	0.8809936	164	0.8437068	164	0.9036286	164	0.8910162	164	0.9139283	164	0.8897356	164	0.9043797	164	-0.2438416	164	-0.1851467	164	-0.2355505	164	-0.2068024	164	-0.1761257	164	-0.1986723	164	-0.1661481	164	-0.1691207	164	-0.1953236
164.2	0.8748366	164.2	0.8447054	164.2	0.9076281	164.2	0.9007723	164.2	0.918574	164.2	0.8933615	164.2	0.9038394	164.2	-0.2423289	164.2	-0.1832657	164.2	-0.2326391	164.2	-0.2086712	164.2	-0.1729114	164.2	-0.1964851	164.2	-0.1599094	164.2	-0.1738782	164.2	-0.1993215
164.4	0.8832594	164.4	0.8482402	164.4	0.9047147	164.4	0.896039	164.4	0.9166849	164.4	0.8945426	164.4	0.9029168	164.4	-0.2440313	164.4	-0.1783028	164.4	-0.2361317	164.4	-0.2057953	164.4	-0.1791121	164.4	-0.1909749	164.4	-0.1609004	164.4	-0.1721005	164.4	-0.1955672
164.6	0.8811066	164.6	0.8470833	164.6	0.9052705	164.6	0.8998332	164.6	0.9151034	164.6	0.900815	164.6	0.9075248	164.6	-0.2438917	164.6	-0.1866608	164.6	-0.2337529	164.6	-0.2013213	164.6	-0.1799975	164.6	-0.1953572	164.6	-0.1567162	164.6	-0.1672885	164.6	-0.1949853
164.8	0.8825432	164.8	0.8451369	164.8	0.9075367	164.8	0.9004499	164.8	0.9225277	164.8	0.8980311	164.8	0.9078693	164.8	-0.2389194	164.8	-0.1843049	164.8	-0.2357979	164.8	-0.200867	164.8	-0.1756765	164.8	-0.1958545	164.8	-0.1633319	164.8	-0.1688918	164.8	-0.1956545
165	0.8871747	165	0.8493589	165	0.9094487	165	0.9009427	165	0.922678	165	0.8942261	165	0.9051375	165	-0.2412865	165	-0.1808343	165	-0.2363984	165	-0.2056652	165	-0.1725889	165	-0.1926985	165	-0.1591317	165	-0.1686777	165	-0.1962282
165.2	0.8873268	165.2	0.852531	165.2	0.9104217	165.2	0.9036449	165.2	0.9229504	165.2	0.8977976	165.2	0.9065011	165.2	-0.2408209	165.2	-0.1814296	165.2	-0.2307295	165.2	-0.2022933	165.2	-0.1721307	165.2	-0.195812	165.2	-0.1604074	165.2	-0.1694326	165.2	-0.1974048
165.4	0.8874664	165.4	0.8530375	165.4	0.9124504	165.4	0.9029973	165.4	0.9261902	165.4	0.9003069	165.4	0.9077787	165.4	-0.2411495	165.4	-0.1786197	165.4	-0.2357105	165.4	-0.2037907	165.4	-0.1740297	165.4	-0.1924188	165.4	-0.1620854	165.4	-0.1693001	165.4	-0.1908786
165.6	0.8910218	165.6	0.853904	165.6	0.9070172	165.6	0.9035746	165.6	0.9227388	165.6	0.8991407	165.6	0.907307	165.6	-0.2434343	165.6	-0.1793847	165.6	-0.2367086	165.6	-0.203276	165.6	-0.173589	165.6	-0.1954036	165.6	-0.1599164	165.6	-0.1712698	165.6	-0.1968703
165.8	0.8942546	165.8	0.8518637	165.8	0.9147534	165.8	0.9041985	165.8	0.9263138	165.8	0.907104	165.8	0.9061177	165.8	-0.2395377	165.8	-0.1779264	165.8	-0.2323965	165.8	-0.2058049	165.8	-0.1736331	165.8	-0.1987494	165.8	-0.1588301	165.8	-0.1705507	165.8	-0.1960597
166	0.8891248	166	0.8530698	166	0.9153154	166	0.9096046	166	0.9230247	166	0.9024453	166	0.910877	166	-0.2444583	166	-0.1810735	166	-0.2377617	166	-0.1989412	166	-0.1712701	166	-0.1966611	166	-0.1588525	166	-0.1676214	166	-0.1986287
166.2	0.8926576	166.2	0.8573565	166.2	0.9159087	166.2	0.9064187	166.2	0.9271464	166.2	0.9039987	166.2	0.917697	166.2	-0.2447652	166.2	-0.1816032	166.2	-0.2381782	166.2	-0.2038657	166.2	-0.1754957	166.2	-0.1945664	166.2	-0.1603413	166.2	-0.1719501	166.2	-0.1947748
166.4	0.8911241	166.4	0.8601652	166.4	0.9133618	166.4	0.9076101	166.4	0.9268698	166.4	0.9021814	166.4	0.9167228	166.4	-0.2425724	166.4	-0.1770474	166.4	-0.2335157	166.4	-0.2050539	166.4	-0.1718999	166.4	-0.1925977	166.4	-0.1622783	166.4	-0.1708636	166.4	-0.1910178
166.6	0.8920093	166.6	0.8563719	166.6	0.9173477	166.6	0.9114435	166.6	0.9258775	166.6	0.9083384	166.6	0.918721	166.6	-0.2358596	166.6	-0.1783728	166.6	-0.2333794	166.6	-0.2047776	166.6	-0.1707313	166.6	-0.1920126	166.6	-0.1603398	166.6	-0.1711667	166.6	-0.1966774
166.8	0.8921573	166.8	0.8608075	166.8	0.917647	166.8	0.9065297	166.8	0.9302585	166.8	0.9027151	166.8	0.9175853	166.8	-0.2403101	166.8	-0.1779614	166.8	-0.2334744	166.8	-0.203688	166.8	-0.1736734	166.8	-0.1937625	166.8	-0.1599596	166.8	-0.1661436	166.8	-0.1913976
167	0.8985193	167	0.8574299	167	0.9225417	167	0.9114051	167	0.9267779	167	0.9057152	167	0.9160467	167	-0.2417788	167	-0.1778858	167	-0.2366883	167	-0.2005255	167	-0.1745753	167	-0.1935351	167	-0.161983	167	-0.170844	167	-0.1992584
167.2	0.8927934	167.2	0.8646585	167.2	0.9191867	167.2	0.9134797	167.2	0.9332368	167.2	0.9089265	167.2	0.9191315	167.2	-0.2408153	167.2	-0.1802706	167.2	-0.2335498	167.2	-0.2043803	167.2	-0.1680479	167.2	-0.1959778	167.2	-0.1577852	167.2	-0.1715771	167.2	-0.197316
167.4	0.8954889	167.4	0.8618274	167.4	0.9245369	167.4	0.92352	167.4	0.9342613	167.4	0.9063092	167.4	0.9191499	167.4	-0.2410213	167.4	-0.1742845	167.4	-0.2320291	167.4	-0.2016937	167.4	-0.1729655	167.4	-0.1882341	167.4	-0.1579126	167.4	-0.1631152	167.4	-0.1843834
167.6	0.9023707	167.6	0.8631427	167.6	0.9191722	167.6	0.9194324	167.6	0.9364272	167.6	0.9099984	167.6	0.918914	167.6	-0.2371963	167.6	-0.1742438	167.6	-0.2337496	167.6	-0.2022823	167.6	-0.1716407	167.6	-0.1976299	167.6	-0.1587149	167.6	-0.1670487	167.6	-0.194666
167.83	0.9014106	167.83	0.8616979	167.83	0.9242603	167.83	0.9212654	167.83	0.9344669	167.83	0.9112082	167.83	0.9236817	167.83	-0.2345421	167.8	-0.1766943	167.8	-0.2312817	167.8	-0.2002879	167.8	-0.1716678	167.8	-0.1939503	167.8	-0.1604501	167.8	-0.1677586	167.8	-0.1933314
168	0.9050209	168	0.8690654	168	0.9264222	168	0.9182815	168	0.9402852	168	0.9146658	168	0.9254031	168	-0.241505	168	-0.1788628	168	-0.2346457	168	-0.2032661	168	-0.1723905	168	-0.1898175	168	-0.1569729	168	-0.1639204	168	-0.1954334
168.2	0.9061775	168.2	0.8642373	168.2	0.9223103	168.2	0.9137026	168.2	0.9353477	168.2	0.9145491	168.2	0.9183409	168.2	-0.2408618	168.2	-0.1783577	168.2	-0.2326901	168.2	-0.2023633	168.2	-0.172567	168.2	-0.1900426	168.2	-0.1560238	168.2	-0.1665653	168.2	-0.1926292
168.4	0.9010192	168.4	0.8699386	168.4	0.927465	168.4	0.9201837	168.4	0.939131	168.4	0.9162427	168.4	0.9267434	168.4	-0.2375713	168.4	-0.1775053	168.4	-0.2307814	168.4	-0.2019233	168.4	-0.1709738	168.4	-0.1956696	168.4	-0.1582215	168.4	-0.1656245	168.4	-0.1969422
168.6	0.9033847	168.6	0.8679155	168.6	0.927674	168.6	0.9192032	168.6	0.9399189	168.6	0.9150764	168.6	0.9261374	168.6	-0.2427512	168.6	-0.1782696	168.6	-0.2318099	168.6	-0.20215	168.6	-0.1697731	168.6	-0.1923564	168.6	-0.1560602	168.6	-0.1729226	168.6	-0.1934347
168.8	0.9052809	168.8	0.8752413	168.8	0.9360887	168.8	0.9189815	168.8	0.9395737	168.8	0.9139541	168.8	0.9252048	168.8	-0.2373408	168.8	-0.1798444	168.8	-0.2307939	168.8	-0.201223	168.8	-0.169413	168.8	-0.1948152	168.8	-0.1586014	168.8	-0.1695632	168.8	-0.1943218
169	0.9072682	169	0.8697302	169	0.9312802	169	0.9210758	169	0.9389958	169	0.9210752	169	0.9302797	169	-0.2359566	169	-0.1759563	169	-0.23065	169	-0.2002062	169	-0.1747035	169	-0.1912117	169	-0.1575494	169	-0.1610646	169	-0.1932283
169.2	0.9099529	169.2	0.869816	169.2	0.9315053	169.2	0.9257753	169.2	0.9484453	169.2	0.9167334	169.2	0.9303404	169.2	-0.2386883	169.2	-0.179583	169.2	-0.2361428	169.2	-0.1987571	169.2	-0.1732495	169.2	-0.1897764	169.2	-0.1548056	169.2	-0.1648701	169.2	-0.194963
169.4	0.9064987	169.4	0.8751181	169.4	0.9330101	169.4	0.9253138	169.4	0.9436739	169.4	0.9174863	169.4	0.9271824	169.4	-0.2370002	169.4	-0.1749949	169.4	-0.2306335	169.4	-0.1968083	169.4	-0.1689315	169.4	-0.1931607	169.4	-0.1610996	169.4	-0.1665159	169.4	-0.1901434
169.6	0.9073582	169.6	0.8700434	169.6	0.9323984	169.6	0.9230667	169.6	0.9434072	169.6	0.9170166	169.6	0.9312335	169.6	-0.2404879	169.6	-0.1746861	169.6	-0.2291175	169.6	-0.1965293	169.6	-0.1700923	169.6	-0.1890782	169.6	-0.1535397	169.6	-0.164326	169.6	-0.1951001
169.8	0.9072208	169.8	0.8716576	169.8	0.9339719	169.8	0.9239968	169.8	0.9472699	169.8	0.9213622	169.8	0.9285944	169.8	-0.2382942	169.8	-0.1789159	169.8	-0.231068	169.8	-0.2000415	169.8	-0.1726386	169.8	-0.1912815	169.8	-0.1553635	169.8	-0.1624243	169.8	-0.1920264
170	0.964667	170	0.9324759	170	0.9911773	170	0.977788	170	0.9990706	170	0.979114	170	0.9925283	170	-0.237534	170	-0.1724005	170	-0.2295239	170	-0.1978123	170	-0.1722918	170	-0.1898357	170	-0.1537924	170	-0.1681573	170	-0.1935625
170.2	0.9583648	170.2	0.9324834	170.2	0.9907305	170.2	0.9778023	170.2	1.001521	170.2	0.9792198	170.2	0.9934968	170.2	-0.2354776	170.2	-0.1716784	170.2	-0.22622	170.2	-0.1999858	170.2	-0.1688414	170.2	-0.1843844	170.2	-0.1548244	170.2	-0.1679472	170.2	-0.1903581
170.4	0.9658772	170.4	0.9273835	170.4	0.9955993	170.4	0.979278	170.4	1.000656	170.4	0.9839135	170.4	0.9932957	170.4	-0.2356674	170.4	-0.173796	170.4	-0.2252308	170.4	-0.1973233	170.4	-0.1649236	170.4	-0.1925579	170.4	-0.1567869	170.4	-0.1643433	170.4	-0.1926451
170.6	0.9639066	170.6	0.9363779	170.6	0.9949421	170.6	0.9841098	170.6	1.002224	170.6	0.9817697	170.6	0.9922841	170.6	-0.2373404	170.6	-0.1734703	170.6	-0.2227617	170.6	-0.1999038	170.6	-0.1667612	170.6	-0.1909166	170.6	-0.1524963	170.6	-0.1610011	170.6	-0.1900116
170.8	0.9670148	170.8	0.9422858	170.8	1.000124	170.8	0.9876445	170.8	1.003106	170.8	0.9800078	170.8	0.9969076	170.8	-0.234284	170.8	-0.1789078	170.8	-0.2308926	170.8	-0.1974253	170.8	-0.1691424	170.8	-0.1897956	170.8	-0.1566983	170.8	-0.1653533	170.8	-0.1953475
171	0.9670408	171	0.9329312	171	0.9986429	171	0.9846978	171	1.00436	171	0.9838802	171	1.000394	171	-0.2391806	171	-0.1732266	171	-0.2286362	171	-0.1979824	171	-0.169536	171	-0.1869777	171	-0.1571534	171	-0.1646	171	-0.1901697
171.2	0.9695803	171.2	0.941229	171.2	0.9955119	171.2	0.988233	171.2	1.007059	171.2	0.9872875	171.2	1.000587	171.2	-0.2372331	171.2	-0.1747679	171.2	-0.2285059	171.2	-0.1980122	171.2	-0.173828	171.2	-0.1909033	171.2	-0.1558265	171.2	-0.1625873	171.2	-0.1881437
171.4	0.9688988	171.4	0.9394807	171.4	0.9949733	171.4	0.9860542	171.4	1.004773	171.4	0.9866703	171.4	0.9942883	171.4	-0.2316996	171.4	-0.1743396	171.4	-0.2273431	171.4	-0.1981352	171.4	-0.1682873	171.4	-0.1865258	171.4	-0.1539105	171.4	-0.1566934	171.4	-0.1917512
171.6	0.9729688	171.6	0.9420741	171.6	0.9973592	171.6	0.9868492	171.6	1.00815	171.6	0.985346	171.6	1.001303	171.6	-0.2379962	171.6	-0.1758502	171.6	-0.2236732	171.6	-0.1959992	171.6	-0.1673783	171.6	-0.1877962	171.6	-0.1574425	171.6	-0.1646695	171.6	-0.1905112
171.8	0.9690819	171.8	0.941613	171.8	0.9982623	171.8	0.9918642	171.8	1.002116	171.8	0.9918337	171.8	1.002686	171.8	-0.2327765	171.8	-0.1731538	171.8	-0.2273101	171.8	-0.1973109	171.8	-0.1659059	171.8	-0.1858022	171.8	-0.1541371	171.8	-0.1617296	171.8	-0.1909454
172	0.9731404	172	0.9432567	172	0.9997232	172	0.9916999	172	1.004453	172	0.9914752	172	0.9975635	172	-0.2312092	172	-0.1751857	172	-0.2244162	172	-0.196293	172	-0.1659406	172	-0.1855475	172	-0.1557402	172	-0.1637336	172	-0.1886885
172.2	0.9740354	172.2	0.9410731	172.2	0.9985014	172.2	0.9912632	172.2	1.011458	172.2	0.9933826	172.2	1.003946	172.2	-0.2371321	172.2	-0.1744075	172.2	-0.2241757	172.2	-0.1941427	172.2	-0.1639019	172.2	-0.188362	172.2	-0.1537426	172.2	-0.1587544	172.2	-0.1922769
172.4	0.9718686	172.4	0.9396728	172.4	0.997104	172.4	0.9848427	172.4	1.009734	172.4	0.9909977	172.4	1.005309	172.4	-0.2334075	172.4	-0.1760778	172.4	-0.2292829	172.4	-0.1960835	172.4	-0.1663335	172.4	-0.1847226	172.4	-0.1508041	172.4	-0.1613068	172.4	-0.1901381
172.6	0.9729313	172.6	0.9418564	172.6	0.9988617	172.6	0.9867908	172.6	1.006838	172.6	0.9907465	172.6	1.004775	172.6	-0.2351295	172.6	-0.1710421	172.6	-0.2297302	172.6	-0.1942662	172.6	-0.1663439	172.6	-0.1899619	172.6	-0.1536443	172.6	-0.1602767	172.6	-0.192972
172.8	0.975309	172.8	0.9394603	172.8	1.002259	172.8	0.9907385	172.8	1.011827	172.8	0.9915723	172.8	1.004915	172.8	-0.2337991	172.8	-0.1717825	172.8	-0.2235569	172.8	-0.1950275	172.8	-0.1666477	172.8	-0.1868817	172.8	-0.1544899	172.8	-0.1678942	172.8	-0.1915357
173	0.976062	173	0.945449	173	0.9973519	173	0.9909075	173	1.010206	173	0.9908339	173	1.006173	173	-0.2326939	173	-0.1718739	173	-0.226341	173	-0.1969024	173	-0.1689124	173	-0.1818198	173	-0.1507973	173	-0.1687339	173	-0.1869989
173.2	0.9741501	173.2	0.9417477	173.2	0.9975005	173.2	0.9931578	173.2	1.010508	173.2	0.989359	173.2	1.008194	173.2	-0.2336965	173.2	-0.1719029	173.2	-0.2205667	173.2	-0.1958588	173.2	-0.1667368	173.2	-0.1882444	173.2	-0.1497364	173.2	-0.1620656	173.2	-0.1942118
173.4	0.9781397	173.4	0.9433327	173.4	1.001869	173.4	0.992029	173.4	1.012709	173.4	0.9920788	173.4	1.002722	173.4	-0.2346376	173.4	-0.1711839	173.4	-0.2216793	173.4	-0.1963369	173.4	-0.1645902	173.4	-0.1877947	173.4	-0.1528898	173.4	-0.1608003	173.4	-0.1870037
173.6	0.9749722	173.6	0.9422016	173.6	1.004119	173.6	0.9914281	173.6	1.014476	173.6	0.9947101	173.6	1.005525	173.6	-0.231558	173.6	-0.177021	173.6	-0.2245969	173.6	-0.1948588	173.6	-0.16427	173.6	-0.1890048	173.6	-0.1493406	173.6	-0.1612703	173.6	-0.1911352
173.8	0.9775476	173.8	0.9442896	173.8	1.000248	173.8	0.9924869	173.8	1.004389	173.8	0.9920678	173.8	1.007642	173.8	-0.2338672	173.8	-0.1696378	173.8	-0.2206432	173.8	-0.1919753	173.8	-0.167383	173.8	-0.1823915	173.8	-0.1492857	173.8	-0.1577054	173.8	-0.1888041
174	0.9770288	174	0.9453148	174	1.003969	174	0.9930158	174	1.015903	174	0.9929975	174	1.007823	174	-0.2296035	174	-0.1711086	174	-0.2264427	174	-0.1934133	174	-0.1623989	174	-0.182318	174	-0.1514211	174	-0.1579227	174	-0.1905162
174.2	0.9796059	174.2	0.9460869	174.2	1.006208	174.2	1.000068	174.2	1.011698	174.2	0.9924016	174.2	1.012965	174.2	-0.235438	174.2	-0.1694704	174.2	-0.2196782	174.2	-0.1936794	174.2	-0.163161	174.2	-0.1880745	174.2	-0.1490166	174.2	-0.157527	174.2	-0.1921067
174.4	0.9720616	174.4	0.9440606	174.4	1.003302	174.4	0.9956326	174.4	1.0107	174.4	0.991004	174.4	1.004304	174.4	-0.2300015	174.4	-0.1690221	174.4	-0.224964	174.4	-0.194744	174.4	-0.1670266	174.4	-0.1846862	174.4	-0.1509444	174.4	-0.1610142	174.4	-0.1889893
174.6	0.9811766	174.6	0.9433268	174.6	1.008719	174.6	0.9937343	174.6	1.011911	174.6	1.001953	174.6	1.012663	174.6	-0.232346	174.6	-0.1673726	174.6	-0.2224108	174.6	-0.1926763	174.6	-0.1618427	174.6	-0.1855247	174.6	-0.1487524	174.6	-0.1588341	174.6	-0.1888486
174.8	0.979975	174.8	0.9454217	174.8	1.005689	174.8	1.000044	174.8	1.015061	174.8	0.9946005	174.8	1.015489	174.8	-0.228309	174.8	-0.1695304	174.8	-0.2262744	174.8	-0.1936735	174.8	-0.1671832	174.8	-0.1904538	174.8	-0.1484562	174.8	-0.1554068	174.8	-0.1866772
175	0.9794275	175	0.9482893	175	1.005776	175	0.9940355	175	1.01612	175	0.9985201	175	1.006023	175	-0.2272128	175	-0.1702591	175	-0.2263979	175	-0.1941046	175	-0.1667211	175	-0.1850636	175	-0.150143	175	-0.1570735	175	-0.1879993
175.2	0.9760401	175.2	0.9534391	175.2	1.008897	175.2	1.001722	175.2	1.018155	175.2	0.9995483	175.2	1.009591	175.2	-0.2286527	175.21	-0.1709726	175.21	-0.221871	175.21	-0.1923969	175.21	-0.1641837	175.21	-0.1828605	175.21	-0.1470561	175.21	-0.1615591	175.21	-0.1912629
175.4	0.9796508	175.4	0.9480355	175.4	1.010425	175.4	0.9967852	175.4	1.014564	175.4	0.9966055	175.4	1.009834	175.4	-0.2279681	175.4	-0.1719714	175.4	-0.2246723	175.4	-0.1912407	175.4	-0.1656735	175.4	-0.1888253	175.4	-0.1484556	175.4	-0.1587907	175.4	-0.1916579
175.6	0.9768158	175.6	0.9489444	175.6	1.010307	175.6	0.9997973	175.6	1.015322	175.6	0.997166	175.6	1.01099	175.6	-0.2298362	175.6	-0.1686074	175.6	-0.2273871	175.6	-0.1959707	175.6	-0.170623	175.6	-0.1820639	175.6	-0.1498436	175.6	-0.1610969	175.6	-0.1864885
175.8	0.9750533	175.8	0.9475729	175.8	1.007382	175.8	1.002919	175.8	1.010997	175.8	0.9982083	175.8	1.012902	175.8	-0.2261811	175.8	-0.1690612	175.8	-0.221777	175.8	-0.188112	175.8	-0.1619091	175.8	-0.1826985	175.8	-0.1465207	175.8	-0.1560917	175.8	-0.1883583
176	0.9829377	176	0.9518403	176	1.009272	176	0.9976106	176	1.014721	176	0.9971807	176	1.006373	176	-0.2307516	176	-0.1683026	176	-0.2256373	176	-0.1963223	176	-0.1629596	176	-0.1844876	176	-0.1478373	176	-0.1606843	176	-0.1876418
176.2	0.974678	176.2	0.9509386	176.2	1.010719	176.2	0.9926929	176.2	1.016736	176.2	1.003849	176.2	1.011461	176.2	-0.2281128	176.2	-0.1687189	176.2	-0.2246833	176.2	-0.1877435	176.2	-0.1638704	176.2	-0.1853233	176.2	-0.1527575	176.2	-0.1573216	176.2	-0.1863582
176.4	0.9812163	176.4	0.946829	176.4	1.005861	176.4	1.000204	176.4	1.018383	176.4	0.9977138	176.4	1.014342	176.4	-0.2281027	176.4	-0.1682894	176.4	-0.2227611	176.4	-0.1889474	176.4	-0.1609691	176.4	-0.1797637	176.4	-0.1452247	176.4	-0.1567026	176.4	-0.1881396
176.6	0.9817418	176.6	0.9477519	176.6	1.010344	176.6	1.000181	176.6	1.020114	176.6	1.005737	176.6	1.010157	176.6	-0.2298511	176.6	-0.1718501	176.6	-0.222599	176.6	-0.1941413	176.6	-0.1623285	176.6	-0.1853002	176.6	-0.1475861	176.6	-0.1614953	176.6	-0.1874608
176.8	0.981934	176.8	0.9518278	176.8	1.00993	176.8	1.001454	176.8	1.017399	176.8	0.9921184	176.8	1.014758	176.8	-0.2281231	176.8	-0.1693598	176.8	-0.2214056	176.8	-0.1923085	176.8	-0.1615369	176.8	-0.1859389	176.8	-0.1487704	176.8	-0.1583911	176.8	-0.1901453
177	0.9809343	177	0.9487716	177	1.009651	177	0.9989298	177	1.013692	177	0.99443	177	1.015736	177	-0.2283857	177	-0.1662135	177	-0.2247951	177	-0.1909645	177	-0.1610265	177	-0.1837275	177	-0.1492142	177	-0.1633525	177	-0.1822854
177.2	0.9807932	177.2	0.9477727	177.2	1.006839	177.2	0.9989757	177.2	1.016895	177.2	1.001411	177.2	1.011466	177.2	-0.2225945	177.2	-0.1685684	177.2	-0.2190971	177.2	-0.1937684	177.2	-0.1635441	177.2	-0.1830225	177.2	-0.1503633	177.2	-0.1559422	177.2	-0.1902078
177.4	0.9776738	177.4	0.951191	177.4	1.010608	177.4	1.002473	177.4	1.01549	177.4	0.9992867	177.4	1.016043	177.4	-0.2212955	177.4	-0.1664962	177.4	-0.2243831	177.4	-0.1870866	177.4	-0.1610795	177.4	-0.1805048	177.4	-0.146583	177.4	-0.1530716	177.4	-0.1887866
177.6	0.9825257	177.6	0.9545035	177.6	1.005527	177.6	0.9974243	177.6	1.018253	177.6	1.000781	177.6	1.010876	177.6	-0.2266482	177.6	-0.1658764	177.6	-0.2236116	177.6	-0.1933375	177.6	-0.1598614	177.6	-0.1861687	177.6	-0.1468469	177.6	-0.156977	177.6	-0.1868074
177.8	0.985254	177.8	0.9527996	177.8	1.01057	177.8	1.003533	177.8	1.015411	177.8	1.004044	177.8	1.01448	177.8	-0.2258556	177.83	-0.1665235	177.83	-0.2232268	177.83	-0.187482	177.83	-0.1576684	177.83	-0.1803208	177.83	-0.1457538	177.83	-0.1567053	177.83	-0.1874228
178	0.9805075	178	0.9501687	178	1.009153	178	1.003588	178	1.01749	178	0.9994198	178	1.013427	178	-0.227474	178	-0.1660425	178	-0.2203495	178	-0.1914313	178	-0.162562	178	-0.1845408	178	-0.1437149	178	-0.1538797	178	-0.1890157
178.2	0.9842041	178.2	0.9529448	178.2	1.014416	178.2	1.002377	178.2	1.017842	178.2	0.9999614	178.2	1.011665	178.2	-0.227275	178.2	-0.1673656	178.2	-0.2206232	178.2	-0.1918738	178.2	-0.1616839	178.2	-0.184002	178.2	-0.1482479	178.2	-0.1563245	178.2	-0.1838058
178.4	0.9845114	178.4	0.9511588	178.4	1.009024	178.4	0.9962305	178.4	1.017942	178.4	0.9956828	178.4	1.015105	178.4	-0.2300578	178.4	-0.1657133	178.4	-0.2175733	178.4	-0.1881184	178.4	-0.1604231	178.4	-0.1873332	178.4	-0.1446886	178.4	-0.1556459	178.4	-0.1870629
178.6	0.9877003	178.6	0.9531937	178.6	1.012258	178.6	0.9998749	178.6	1.017937	178.6	1.003605	178.6	1.021249	178.6	-0.2241479	178.6	-0.1663122	178.6	-0.2218155	178.6	-0.190137	178.6	-0.1610235	178.6	-0.182742	178.6	-0.1467973	178.6	-0.1567297	178.6	-0.1831978
178.8	0.9900798	178.8	0.9525329	178.8	1.004703	178.8	1.003502	178.8	1.021197	178.8	1.005308	178.8	1.01726	178.8	-0.2267526	178.8	-0.166699	178.8	-0.2202327	178.8	-0.1887112	178.8	-0.1637379	178.8	-0.184451	178.8	-0.1447417	178.8	-0.1544256	178.8	-0.1868077
179	0.9836441	179	0.9571303	179	1.010428	179	0.9985361	179	1.021531	179	1.00252	179	1.017456	179	-0.2276445	179	-0.1630321	179	-0.2187018	179	-0.1907333	179	-0.1565138	179	-0.185752	179	-0.1482917	179	-0.1578406	179	-0.1849852
179.2	0.9820374	179.2	0.9541147	179.2	1.012009	179.2	1.002017	179.2	1.019737	179.2	1.003891	179.2	1.011409	179.2	-0.2226512	179.2	-0.1674031	179.2	-0.2207152	179.2	-0.1868584	179.2	-0.1611294	179.2	-0.1832172	179.2	-0.1483999	179.2	-0.1511949	179.2	-0.1847974
179.4	0.9858654	179.4	0.955443	179.4	1.010027	179.4	0.9997725	179.4	1.021936	179.4	1.001581	179.4	1.012938	179.4	-0.2235341	179.4	-0.1631534	179.4	-0.2239811	179.4	-0.1907743	179.4	-0.1603268	179.4	-0.1832826	179.4	-0.1464391	179.4	-0.1546888	179.4	-0.187633
179.6	0.986588	179.6	0.9535122	179.6	1.009968	179.6	1.001348	179.6	1.018114	179.6	1.004097	179.6	1.019302	179.6	-0.2260791	179.6	-0.1655435	179.6	-0.216164	179.6	-0.1905895	179.6	-0.1578471	179.6	-0.1839565	179.6	-0.1445509	179.6	-0.1568785	179.6	-0.1857643
179.8	0.9856658	179.8	0.9521022	179.8	1.015873	179.8	1.002946	179.8	1.017453	179.8	1.002212	179.8	1.020069	179.8	-0.223341	179.8	-0.1603713	179.8	-0.2197245	179.8	-0.1913398	179.8	-0.1609178	179.8	-0.1785805	179.8	-0.1462749	179.8	-0.1534022	179.8	-0.1850038
180	0.9839903	180	0.9552078	180	1.010193	180	1.006591	180	1.018034	180	0.9991983	180	1.017237	180	-0.2234279	180	-0.1636072	180	-0.215049	180	-0.1881837	180	-0.1579217	180	-0.1817797	180	-0.1465764	180	-0.1522596	180	-0.1850964
180.2	0.9851097	180.2	0.9544921	180.2	1.011685	180.2	1.001403	180.2	1.0189	180.2	1.006014	180.2	1.019208	180.2	-0.222357	180.2	-0.1657464	180.2	-0.2206626	180.2	-0.1893224	180.2	-0.1565768	180.2	-0.180867	180.2	-0.1424071	180.2	-0.1550898	180.2	-0.1868217
180.4	0.9845782	180.4	0.9552654	180.4	1.01329	180.4	1.004647	180.4	1.021562	180.4	1.00307	180.4	1.013086	180.4	-0.2224975	180.4	-0.1662331	180.4	-0.2152589	180.4	-0.188966	180.4	-0.1557203	180.4	-0.1796807	180.4	-0.143861	180.4	-0.1571714	180.4	-0.184246
180.6	0.9925411	180.6	0.9526158	180.6	1.011148	180.6	1.005669	180.6	1.02041	180.6	1.003591	180.6	1.020123	180.6	-0.2256911	180.6	-0.1663165	180.6	-0.2190373	180.6	-0.1868304	180.6	-0.1596495	180.6	-0.177663	180.6	-0.1466783	180.6	-0.1569777	180.6	-0.1833521
180.8	0.9840449	180.8	0.9544675	180.8	1.011727	180.8	1.005634	180.8	1.020932	180.8	1.004768	180.8	1.020087	180.8	-0.2243182	180.8	-0.1650312	180.8	-0.2167709	180.8	-0.1866066	180.8	-0.1566153	180.8	-0.1798788	180.8	-0.1434465	180.8	-0.1535094	180.8	-0.1818861
181	0.986339	181	0.9580003	181	1.014678	181	1.005795	181	1.018766	181	1.004036	181	1.018976	181	-0.2247524	181	-0.1643177	181	-0.2193767	181	-0.1895269	181	-0.1569066	181	-0.1805524	181	-0.1424389	181	-0.1516683	181	-0.1863803
181.2	0.9877069	181.2	0.9555936	181.2	1.016775	181.2	1.002428	181.2	1.021838	181.2	1.011471	181.2	1.019658	181.2	-0.2237242	181.2	-0.1637937	181.2	-0.2172415	181.2	-0.1877419	181.2	-0.1583525	181.2	-0.1823923	181.2	-0.1428513	181.2	-0.1523293	181.2	-0.181146
181.4	0.9896262	181.4	0.953145	181.4	1.015407	181.4	1.008242	181.4	1.02243	181.4	1.007705	181.4	1.022048	181.4	-0.2242402	181.4	-0.1638295	181.4	-0.2194783	181.4	-0.1850367	181.4	-0.1552135	181.4	-0.1793679	181.4	-0.144704	181.4	-0.150267	181.4	-0.182899
181.6	0.9825708	181.6	0.9594758	181.6	1.015773	181.6	1.005321	181.6	1.019457	181.6	1.00304	181.6	1.016298	181.6	-0.224318	181.6	-0.1654217	181.6	-0.2182471	181.6	-0.1874409	181.6	-0.1560676	181.6	-0.1728188	181.6	-0.1422725	181.6	-0.1512562	181.6	-0.1801681
181.8	0.9848102	181.8	0.9565682	181.8	1.010503	181.8	1.006325	181.8	1.023881	181.8	1.008359	181.8	1.022745	181.8	-0.2224695	181.8	-0.1594312	181.8	-0.2208157	181.8	-0.1866827	181.8	-0.1571508	181.8	-0.1745373	181.8	-0.1461214	181.8	-0.1499234	181.8	-0.1810704
182	0.985176	182	0.9581661	182	1.013798	182	1.007858	182	1.027623	182	1.005364	182	1.01579	182	-0.219697	182	-0.1641413	182	-0.2167009	182	-0.1819974	182	-0.1578054	182	-0.1780227	182	-0.1396775	182	-0.1518615	182	-0.1852418
182.2	0.9874178	182.2	0.958239	182.2	1.016388	182.2	1.003532	182.2	1.023994	182.2	1.003266	182.2	1.018282	182.2	-0.2242231	182.2	-0.1643483	182.2	-0.2149365	182.2	-0.1856497	182.2	-0.1551543	182.2	-0.1762239	182.2	-0.1469396	182.2	-0.1506646	182.2	-0.18024
182.4	0.988615	182.4	0.9538177	182.4	1.012552	182.4	1.009	182.4	1.025292	182.4	1.004263	182.4	1.016991	182.4	-0.2215286	182.4	-0.1604518	182.4	-0.2188707	182.4	-0.1856751	182.4	-0.1538639	182.4	-0.1769197	182.4	-0.1446907	182.4	-0.1517397	182.4	-0.1868187
182.6	0.9846306	182.6	0.9598976	182.6	1.014581	182.6	1.005403	182.6	1.021797	182.6	1.006953	182.6	1.020496	182.6	-0.2215221	182.6	-0.161605	182.6	-0.2202354	182.6	-0.1819255	182.6	-0.1588231	182.6	-0.1805985	182.6	-0.1465221	182.6	-0.149526	182.6	-0.1822889
182.8	0.9888991	182.8	0.9552935	182.8	1.0206	182.8	1.005355	182.8	1.025026	182.8	1.007715	182.8	1.018318	182.8	-0.2273056	182.8	-0.1669319	182.8	-0.216119	182.8	-0.1860766	182.8	-0.1507682	182.8	-0.1791294	182.8	-0.1416879	182.8	-0.1497327	182.8	-0.1802008
183	0.9835824	183	0.9570663	183	1.018442	183	1.007638	183	1.023837	183	1.002728	183	1.015036	183	-0.2215744	183	-0.1638887	183	-0.2189646	183	-0.1859291	183	-0.1566039	183	-0.1839135	183	-0.1391445	183	-0.1462514	183	-0.1808602
183.2	0.9901062	183.2	0.9572745	183.2	1.018024	183.2	1.010569	183.2	1.022823	183.2	1.005594	183.2	1.023349	183.2	-0.2244938	183.2	-0.1594077	183.2	-0.2160058	183.2	-0.1897193	183.2	-0.1542541	183.2	-0.1786489	183.2	-0.1398177	183.2	-0.1536034	183.2	-0.1858888
183.4	0.9876629	183.4	0.9596635	183.4	1.026605	183.4	1.004321	183.4	1.018294	183.4	1.009838	183.4	1.022386	183.4	-0.2235808	183.41	-0.161136	183.41	-0.2153114	183.41	-0.1783384	183.41	-0.1567676	183.41	-0.1769567	183.41	-0.1449956	183.41	-0.1512897	183.41	-0.1833965
183.6	0.9851751	183.6	0.9582938	183.6	1.015493	183.6	1.005754	183.6	1.021447	183.6	1.003794	183.6	1.027101	183.6	-0.226322	183.6	-0.1569072	183.6	-0.21521	183.6	-0.1842839	183.6	-0.1567319	183.6	-0.1787026	183.6	-0.1399134	183.6	-0.1554871	183.6	-0.1837488
183.8	0.9859107	183.8	0.9574816	183.8	1.017231	183.8	1.007612	183.8	1.023908	183.8	1.006969	183.8	1.018831	183.8	-0.2210252	183.8	-0.1602075	183.8	-0.2162174	183.8	-0.1844549	183.8	-0.1547132	183.8	-0.1769572	183.8	-0.1372201	183.8	-0.1523246	183.8	-0.1813404
184	0.9869098	184	0.9529412	184	1.01588	184	1.006589	184	1.028358	184	1.008724	184	1.02171	184	-0.2221194	184	-0.1597187	184	-0.2165854	184	-0.1866314	184	-0.1525949	184	-0.175439	184	-0.1415	184	-0.1494483	184	-0.1818836
184.2	0.985388	184.2	0.9594798	184.2	1.018493	184.2	1.007038	184.2	1.023317	184.2	1.01064	184.2	1.022839	184.2	-0.2252276	184.2	-0.1634281	184.2	-0.2166764	184.2	-0.1834118	184.2	-0.1538037	184.2	-0.1794124	184.2	-0.143398	184.2	-0.1490611	184.2	-0.1874445
184.4	0.9919481	184.4	0.961756	184.4	1.019624	184.4	1.010165	184.4	1.026143	184.4	1.008091	184.4	1.026389	184.4	-0.2180148	184.4	-0.1579819	184.4	-0.2152597	184.4	-0.1863764	184.4	-0.148575	184.4	-0.1795737	184.4	-0.1390193	184.4	-0.1468066	184.4	-0.1854769
184.6	0.9958653	184.6	0.956687	184.6	1.018704	184.6	1.006508	184.6	1.021851	184.6	1.008065	184.6	1.019576	184.6	-0.2246906	184.6	-0.1574548	184.6	-0.2137886	184.6	-0.1872568	184.6	-0.1475174	184.6	-0.174585	184.6	-0.1394665	184.6	-0.1485509	184.6	-0.1826236
184.8	0.9898418	184.8	0.956002	184.8	1.015267	184.8	1.009522	184.8	1.023263	184.8	1.011546	184.8	1.022235	184.8	-0.2227024	184.8	-0.1573556	184.8	-0.2151151	184.8	-0.1852524	184.8	-0.1533301	184.8	-0.1808771	184.8	-0.1399981	184.8	-0.1517521	184.8	-0.1828539
185	0.9878364	185	0.9592496	185	1.017848	185	1.010265	185	1.027809	185	1.00592	185	1.021219	185	-0.2259828	185	-0.1576755	185	-0.2186116	185	-0.1842516	185	-0.1534791	185	-0.1749762	185	-0.1396734	185	-0.1485854	185	-0.1843208
185.2	0.9909444	185.2	0.9604866	185.2	1.019098	185.2	1.011289	185.2	1.026362	185.2	1.008414	185.2	1.019471	185.2	-0.22554	185.2	-0.1623797	185.2	-0.214337	185.2	-0.1837162	185.2	-0.156571	185.2	-0.1757307	185.2	-0.1412183	185.2	-0.1473527	185.2	-0.1804799
185.4	0.9921941	185.4	0.9638483	185.4	1.021115	185.4	1.010137	185.4	1.022906	185.4	1.010489	185.4	1.024065	185.4	-0.2165768	185.4	-0.1580963	185.4	-0.2135089	185.4	-0.183009	185.4	-0.1501586	185.4	-0.1754879	185.4	-0.1404465	185.4	-0.148044	185.4	-0.1795641
185.6	0.9893767	185.6	0.962307	185.6	1.015151	185.6	1.008469	185.6	1.024442	185.6	1.008373	185.6	1.019168	185.6	-0.2235279	185.6	-0.1610018	185.6	-0.2154158	185.6	-0.1831982	185.6	-0.1534588	185.6	-0.1792609	185.6	-0.1407916	185.6	-0.1430573	185.6	-0.1793352
185.8	0.9921006	185.8	0.9567778	185.8	1.017328	185.8	1.006447	185.8	1.026302	185.8	1.014708	185.8	1.024368	185.8	-0.217335	185.8	-0.1568616	185.8	-0.213786	185.8	-0.1821311	185.8	-0.1536098	185.8	-0.177295	185.8	-0.1418181	185.8	-0.1509577	185.8	-0.1814074
186	0.9893435	186	0.9553846	186	1.01354	186	1.006285	186	1.022094	186	1.010909	186	1.026515	186	-0.2162466	186	-0.1613789	186	-0.2077292	186	-0.1841886	186	-0.1514925	186	-0.1758599	186	-0.1389687	186	-0.1515979	186	-0.1829224
186.2	0.9925072	186.2	0.9607398	186.2	1.020184	186.2	1.013015	186.2	1.030346	186.2	1.00851	186.2	1.021237	186.2	-0.2199567	186.2	-0.157038	186.2	-0.2143427	186.2	-0.1827237	186.2	-0.1484918	186.2	-0.173006	186.2	-0.1411351	186.2	-0.1472419	186.2	-0.1811383
186.4	0.9870847	186.4	0.9601256	186.4	1.022238	186.4	1.009026	186.4	1.025225	186.4	1.008456	186.4	1.025864	186.4	-0.2237884	186.4	-0.1584553	186.4	-0.2159389	186.4	-0.180579	186.4	-0.1522625	186.4	-0.1788969	186.4	-0.1390444	186.4	-0.1435834	186.4	-0.1839074
186.6	0.9912543	186.6	0.9604547	186.6	1.015082	186.6	1.012565	186.6	1.026405	186.6	1.014327	186.6	1.028284	186.6	-0.2215876	186.6	-0.1597894	186.6	-0.2132265	186.6	-0.1815836	186.6	-0.1551551	186.6	-0.1717247	186.6	-0.1390667	186.6	-0.1441245	186.6	-0.1759418
186.8	0.992043	186.8	0.9601324	186.8	1.016796	186.8	1.012942	186.8	1.029671	186.8	1.009326	186.8	1.024168	186.8	-0.219233	186.8	-0.1624859	186.8	-0.2119919	186.8	-0.1819742	186.8	-0.1529332	186.8	-0.1727721	186.8	-0.1393354	186.8	-0.1464462	186.8	-0.1800879
187	0.9951254	187	0.9594241	187	1.019421	187	1.01483	187	1.031498	187	1.010158	187	1.019642	187	-0.2215878	187	-0.1572681	187	-0.209139	187	-0.1827817	187	-0.1561662	187	-0.1702835	187	-0.1381144	187	-0.1471341	187	-0.1840527
187.2	0.9910599	187.2	0.9616351	187.2	1.02381	187.2	1.010191	187.2	1.025888	187.2	1.014056	187.2	1.026952	187.2	-0.2240402	187.2	-0.1598196	187.2	-0.2132377	187.2	-0.1792846	187.2	-0.152119	187.2	-0.1713888	187.2	-0.1409353	187.2	-0.1467165	187.2	-0.1827882
187.4	0.9903803	187.4	0.9647264	187.4	1.018715	187.4	1.013645	187.4	1.026033	187.4	1.013338	187.4	1.027199	187.4	-0.2219464	187.4	-0.157451	187.4	-0.2096349	187.4	-0.180535	187.4	-0.1543182	187.4	-0.1785557	187.4	-0.1374449	187.4	-0.1449877	187.4	-0.180231
187.6	0.9922016	187.6	0.9609858	187.6	1.020636	187.6	1.009631	187.6	1.028819	187.6	1.012188	187.6	1.025943	187.6	-0.2204527	187.6	-0.1578507	187.6	-0.2131995	187.6	-0.1835461	187.6	-0.1517295	187.6	-0.1691038	187.6	-0.1360213	187.6	-0.149357	187.6	-0.1794642
187.8	0.9904577	187.8	0.963614	187.8	1.022326	187.8	1.01009	187.8	1.027613	187.8	1.009279	187.8	1.026129	187.8	-0.2194584	187.8	-0.1616072	187.8	-0.2085907	187.8	-0.1827969	187.8	-0.1535842	187.8	-0.1724237	187.8	-0.1389831	187.8	-0.1483209	187.8	-0.1749636
188	0.991991	188	0.9635681	188	1.022581	188	1.013365	188	1.028286	188	1.010624	188	1.023204	188	-0.2204854	188	-0.1589376	188	-0.2127449	188	-0.1871884	188	-0.1454996	188	-0.1703892	188	-0.1405112	188	-0.1506942	188	-0.1790277
188.2	0.9970092	188.2	0.9633461	188.2	1.021275	188.2	1.014528	188.2	1.026624	188.2	1.012151	188.2	1.022489	188.2	-0.2170382	188.2	-0.1552372	188.2	-0.2163658	188.2	-0.1814775	188.2	-0.1522915	188.2	-0.1713837	188.2	-0.1388082	188.2	-0.1435274	188.2	-0.1763967
188.4	0.9901578	188.4	0.962419	188.4	1.017729	188.4	1.009771	188.4	1.029261	188.4	1.012089	188.4	1.024588	188.4	-0.2176323	188.4	-0.1580685	188.4	-0.2100211	188.4	-0.1786647	188.4	-0.1515274	188.4	-0.17075	188.4	-0.1367673	188.4	-0.1456504	188.4	-0.1797708
188.6	0.9948211	188.6	0.9652181	188.6	1.018861	188.6	1.012896	188.6	1.028394	188.6	1.013934	188.6	1.027836	188.6	-0.2196696	188.6	-0.1554329	188.6	-0.2133836	188.6	-0.1803377	188.6	-0.1524862	188.6	-0.17168	188.6	-0.136346	188.6	-0.1457963	188.6	-0.1801005
188.8	0.9964191	188.8	0.9622295	188.8	1.022994	188.8	1.015041	188.8	1.030681	188.8	1.011711	188.8	1.031369	188.8	-0.2224888	188.8	-0.1571245	188.8	-0.2081685	188.8	-0.178387	188.8	-0.1493555	188.8	-0.1735024	188.8	-0.1334212	188.8	-0.1441306	188.8	-0.1792755
189	0.9903531	189	0.9613978	189	1.023623	189	1.016658	189	1.027714	189	1.015712	189	1.026721	189	-0.2180035	189	-0.1588475	189	-0.2107842	189	-0.1806267	189	-0.1491185	189	-0.1717435	189	-0.1371211	189	-0.1475793	189	-0.174723
189.2	0.9953562	189.2	0.9636177	189.2	1.019491	189.2	1.00941	189.2	1.029708	189.2	1.010573	189.2	1.022334	189.2	-0.2232049	189.2	-0.1530665	189.2	-0.2085239	189.2	-0.1828328	189.2	-0.1512982	189.2	-0.1718284	189.2	-0.1362831	189.2	-0.1454328	189.2	-0.1776888
189.4	0.9939926	189.4	0.9672861	189.4	1.019832	189.4	1.01452	189.4	1.029066	189.4	1.013787	189.4	1.029487	189.4	-0.2204973	189.4	-0.1556345	189.4	-0.2121474	189.4	-0.1789144	189.4	-0.1506199	189.4	-0.1736493	189.4	-0.133521	189.4	-0.1435773	189.4	-0.1809599
189.6	0.9974884	189.6	0.9622826	189.6	1.026373	189.6	1.008583	189.6	1.028555	189.6	1.01249	189.6	1.026192	189.6	-0.2212336	189.6	-0.1566929	189.6	-0.2080991	189.6	-0.1785964	189.6	-0.1468021	189.6	-0.174504	189.6	-0.138371	189.6	-0.1434669	189.6	-0.1785927
189.8	0.9939971	189.8	0.9626602	189.8	1.017374	189.8	1.010666	189.8	1.029886	189.8	1.016822	189.8	1.028275	189.8	-0.2181806	189.8	-0.1552425	189.8	-0.20859	189.8	-0.1804255	189.8	-0.1503765	189.8	-0.1704853	189.8	-0.141561	189.8	-0.1462142	189.8	-0.1816508
190	0.9909284	190	0.9613442	190	1.024733	190	1.010064	190	1.03031	190	1.017354	190	1.026469	190	-0.2183752	190	-0.1548721	190	-0.2121607	190	-0.1815346	190	-0.151637	190	-0.1685982	190	-0.1351287	190	-0.1438965	190	-0.1801803
190.2	0.9916971	190.2	0.9578566	190.2	1.023331	190.2	1.01175	190.2	1.030183	190.2	1.014005	190.2	1.029701	190.2	-0.2175031	190.2	-0.1515511	190.2	-0.2072315	190.2	-0.1801181	190.2	-0.1503804	190.2	-0.1738225	190.2	-0.135233	190.2	-0.1464598	190.2	-0.1775525
190.4	0.9922842	190.4	0.9643846	190.4	1.024721	190.4	1.016864	190.4	1.030857	190.4	1.015078	190.4	1.031672	190.4	-0.2190995	190.4	-0.1527762	190.4	-0.2071945	190.4	-0.1797908	190.4	-0.1461475	190.4	-0.1728889	190.4	-0.1362569	190.4	-0.144525	190.4	-0.1802656
190.6	0.9950482	190.6	0.9631079	190.6	1.021614	190.6	1.012431	190.6	1.030609	190.6	1.014198	190.6	1.025753	190.6	-0.2203968	190.6	-0.1586554	190.6	-0.2072838	190.6	-0.1774796	190.6	-0.1502933	190.6	-0.1686531	190.6	-0.1361896	190.6	-0.1438894	190.6	-0.1775214
190.8	0.9990293	190.8	0.9613655	190.8	1.024161	190.8	1.017642	190.8	1.028186	190.8	1.010762	190.8	1.028945	190.8	-0.2189164	190.8	-0.1532891	190.8	-0.2080421	190.8	-0.1789749	190.8	-0.1465986	190.8	-0.17048	190.8	-0.1338234	190.8	-0.1428245	190.8	-0.1764484
191	0.9933572	191	0.965322	191	1.023026	191	1.014645	191	1.033045	191	1.018964	191	1.029464	191	-0.214292	191	-0.1563391	191	-0.2077903	191	-0.1771195	191	-0.1522834	191	-0.1709623	191	-0.1364875	191	-0.1419237	191	-0.1739232
191.2	0.9889023	191.2	0.9656198	191.2	1.026456	191.2	1.009739	191.2	1.030232	191.2	1.015953	191.2	1.025624	191.2	-0.2149652	191.2	-0.1591104	191.2	-0.2088269	191.2	-0.1781247	191.2	-0.1503228	191.2	-0.1741995	191.2	-0.1369392	191.2	-0.1434114	191.2	-0.1778344
191.4	0.9954657	191.4	0.9648336	191.4	1.026238	191.4	1.016081	191.4	1.030148	191.4	1.016924	191.4	1.025693	191.4	-0.2180745	191.4	-0.1542416	191.4	-0.2119141	191.4	-0.1783694	191.4	-0.1492377	191.4	-0.1661976	191.4	-0.1312054	191.4	-0.1398976	191.4	-0.1795178
191.6	0.9916745	191.6	0.9637934	191.6	1.025307	191.6	1.014888	191.6	1.035256	191.6	1.015015	191.6	1.030561	191.6	-0.2188353	191.6	-0.1531775	191.6	-0.2066933	191.6	-0.1798798	191.6	-0.1472545	191.6	-0.1704721	191.6	-0.1322198	191.6	-0.1432932	191.6	-0.1779756
191.8	0.991824	191.8	0.9681193	191.8	1.026955	191.8	1.014075	191.8	1.033882	191.8	1.018037	191.8	1.025198	191.8	-0.2147811	191.8	-0.1528278	191.8	-0.2091885	191.8	-0.1759569	191.8	-0.1445854	191.8	-0.1718204	191.8	-0.1314811	191.8	-0.1446394	191.8	-0.178346
192	0.9970109	192	0.9632155	192	1.024907	192	1.012099	192	1.029621	192	1.017395	192	1.030052	192	-0.2120418	192	-0.155307	192	-0.2028642	192	-0.1763694	192	-0.1447187	192	-0.1684239	192	-0.1330582	192	-0.1412093	192	-0.1741256
192.2	0.9945349	192.2	0.9662091	192.2	1.02209	192.2	1.012393	192.2	1.03259	192.2	1.015024	192.2	1.029611	192.2	-0.2213534	192.2	-0.1539117	192.2	-0.2102003	192.2	-0.1741167	192.2	-0.1507169	192.2	-0.1696949	192.2	-0.1357637	192.2	-0.1418478	192.2	-0.1765795
192.4	0.9952652	192.4	0.9638754	192.4	1.025229	192.4	1.013189	192.4	1.032021	192.4	1.015228	192.4	1.027457	192.4	-0.2118924	192.4	-0.151344	192.4	-0.2076898	192.4	-0.1737341	192.4	-0.1440699	192.4	-0.1699051	192.4	-0.131279	192.4	-0.1420621	192.4	-0.1752331
192.6	0.9962395	192.6	0.9686382	192.6	1.029226	192.6	1.00761	192.6	1.033393	192.6	1.017322	192.6	1.03014	192.6	-0.2159308	192.6	-0.1504717	192.6	-0.20831	192.6	-0.1763009	192.6	-0.1453776	192.6	-0.1664513	192.6	-0.1355937	192.6	-0.1422839	192.6	-0.1759667
192.8	1.002122	192.8	0.9628562	192.8	1.026933	192.8	1.017091	192.8	1.033832	192.8	1.017061	192.8	1.029552	192.8	-0.214521	192.8	-0.1542836	192.8	-0.2066456	192.8	-0.1763375	192.8	-0.1497778	192.8	-0.165492	192.8	-0.1303575	192.8	-0.1395815	192.8	-0.176826
193	0.9974619	193	0.9684994	193	1.025242	193	1.018309	193	1.033048	193	1.014842	193	1.030169	193	-0.2187782	193	-0.1518162	193	-0.2096991	193	-0.173746	193	-0.1477436	193	-0.1719115	193	-0.1351741	193	-0.1414261	193	-0.1744788
193.2	0.9962032	193.2	0.9674918	193.2	1.027738	193.2	1.015239	193.2	1.033455	193.2	1.01889	193.2	1.031726	193.2	-0.2155662	193.2	-0.1511066	193.2	-0.2057641	193.2	-0.1737715	193.2	-0.1472348	193.2	-0.1663548	193.2	-0.1335544	193.2	-0.1432993	193.2	-0.1783336
193.4	0.9940943	193.4	0.964081	193.4	1.022866	193.4	1.014056	193.4	1.029898	193.4	1.020042	193.4	1.029958	193.4	-0.2136364	193.4	-0.1503984	193.4	-0.2078343	193.4	-0.1737372	193.4	-0.1475642	193.4	-0.1672554	193.4	-0.1354928	193.4	-0.1429086	193.4	-0.1744427
193.6	0.998669	193.6	0.9679823	193.6	1.031179	193.6	1.015817	193.6	1.033178	193.6	1.018862	193.6	1.027854	193.6	-0.2153413	193.6	-0.1508044	193.6	-0.2085705	193.6	-0.1748056	193.6	-0.1427235	193.6	-0.172349	193.6	-0.1324267	193.6	-0.1407661	193.6	-0.1756599
193.8	1.000567	193.8	0.9673922	193.8	1.02703	193.8	1.014382	193.8	1.035382	193.8	1.019027	193.8	1.035663	193.8	-0.2132448	193.8	-0.1518282	193.8	-0.2045708	193.8	-0.1770938	193.8	-0.1474537	193.8	-0.1651185	193.8	-0.1330827	193.8	-0.1419578	193.8	-0.1792657
194	0.9978044	194	0.9690685	194	1.026585	194	1.016653	194	1.038147	194	1.021469	194	1.03097	194	-0.2171478	194	-0.1495579	194	-0.204857	194	-0.177706	194	-0.1455932	194	-0.1671965	194	-0.1294483	194	-0.1411611	194	-0.1762172
194.2	1.00359	194.2	0.9633867	194.2	1.021656	194.2	1.015961	194.2	1.031418	194.2	1.021949	194.2	1.030263	194.2	-0.2168397	194.2	-0.1571036	194.2	-0.2117032	194.2	-0.1742719	194.2	-0.1455826	194.2	-0.1670129	194.2	-0.1348899	194.2	-0.1392514	194.2	-0.1768212
194.4	0.9976023	194.4	0.96819	194.4	1.025826	194.4	1.012807	194.4	1.032266	194.4	1.020568	194.4	1.03382	194.4	-0.2181005	194.4	-0.1506532	194.4	-0.2058934	194.4	-0.1723393	194.4	-0.1484606	194.4	-0.1726923	194.4	-0.1319546	194.4	-0.1380384	194.4	-0.1823798
194.6	1.001359	194.6	0.9645703	194.6	1.024773	194.6	1.016633	194.6	1.032179	194.6	1.019511	194.6	1.034082	194.6	-0.215704	194.6	-0.152293	194.6	-0.204359	194.6	-0.1763344	194.6	-0.148027	194.6	-0.1645485	194.6	-0.1309071	194.6	-0.1415006	194.6	-0.1760972
194.8	0.9979867	194.8	0.9680551	194.8	1.027394	194.8	1.022258	194.8	1.035578	194.8	1.020164	194.8	1.03272	194.8	-0.2138952	194.8	-0.1523455	194.8	-0.2051088	194.8	-0.1759271	194.8	-0.1471294	194.8	-0.1685473	194.8	-0.1297482	194.8	-0.1412527	194.8	-0.1737747
195	0.9981129	195	0.9685605	195	1.03075	195	1.019078	195	1.035601	195	1.016254	195	1.031093	195	-0.2151856	195	-0.1501584	195	-0.2075965	195	-0.1719351	195	-0.1462199	195	-0.1721547	195	-0.1268197	195	-0.1384591	195	-0.1704344
195.2	0.9997447	195.2	0.9715039	195.2	1.028255	195.2	1.01675	195.2	1.033832	195.2	1.017761	195.2	1.034787	195.2	-0.210779	195.2	-0.1517659	195.2	-0.2014152	195.2	-0.1712514	195.2	-0.1426104	195.2	-0.1663473	195.2	-0.1290463	195.2	-0.1410303	195.2	-0.1713858
195.4	1.000584	195.4	0.9681953	195.4	1.028937	195.4	1.016332	195.4	1.0363	195.4	1.019284	195.4	1.03342	195.4	-0.2148041	195.4	-0.1486934	195.4	-0.202624	195.4	-0.1705614	195.4	-0.1444964	195.4	-0.1703135	195.4	-0.1259357	195.4	-0.1420293	195.4	-0.1739012
195.6	1.006778	195.6	0.9631389	195.6	1.02864	195.6	1.021377	195.6	1.033201	195.6	1.018948	195.6	1.031226	195.6	-0.2102502	195.6	-0.1510279	195.6	-0.2056854	195.6	-0.1748978	195.6	-0.1426127	195.6	-0.1677614	195.6	-0.13078	195.6	-0.1432406	195.6	-0.1716755
195.8	1.000701	195.8	0.9672622	195.8	1.028932	195.8	1.017	195.8	1.034348	195.8	1.021312	195.8	1.036961	195.8	-0.2088599	195.8	-0.1521209	195.8	-0.2053834	195.8	-0.1718278	195.8	-0.1414491	195.8	-0.1675589	195.8	-0.1305062	195.8	-0.1380654	195.8	-0.1737096
196	1.000925	196	0.9673766	196	1.032039	196	1.017211	196	1.03266	196	1.021286	196	1.036225	196	-0.2126492	196.01	-0.1489627	196.01	-0.2055475	196.01	-0.1723987	196.01	-0.145432	196.01	-0.1666879	196.01	-0.1310852	196.01	-0.1374965	196.01	-0.1719291
196.2	1.003937	196.2	0.9728494	196.2	1.03129	196.2	1.022461	196.2	1.031563	196.2	1.020109	196.2	1.0334	196.2	-0.2154333	196.2	-0.147017	196.2	-0.2065661	196.2	-0.1705411	196.2	-0.1388932	196.2	-0.1710361	196.2	-0.1321044	196.2	-0.1365837	196.2	-0.1728881
196.4	0.9962666	196.4	0.9658772	196.4	1.029403	196.4	1.017327	196.4	1.038493	196.4	1.02091	196.4	1.03083	196.4	-0.2088561	196.4	-0.1493192	196.4	-0.2058486	196.4	-0.1710468	196.4	-0.1421624	196.4	-0.1687986	196.4	-0.1311094	196.4	-0.1386794	196.4	-0.1724498
196.6	1.004282	196.6	0.9689968	196.6	1.029461	196.6	1.016567	196.6	1.036377	196.6	1.019412	196.6	1.033556	196.6	-0.2125734	196.6	-0.1466301	196.6	-0.2051091	196.6	-0.1748594	196.6	-0.1458723	196.6	-0.1662187	196.6	-0.1304921	196.6	-0.1372375	196.6	-0.1742986
196.8	1.00112	196.8	0.9710428	196.8	1.028611	196.8	1.020677	196.8	1.033349	196.8	1.019433	196.8	1.031484	196.8	-0.2182561	196.8	-0.1496189	196.8	-0.2058752	196.8	-0.1750119	196.8	-0.1435738	196.8	-0.1680906	196.8	-0.1277631	196.8	-0.1345691	196.8	-0.175624
197	1.003127	197	0.9666788	197	1.028476	197	1.017421	197	1.036991	197	1.024862	197	1.035479	197	-0.2145288	197	-0.1488534	197	-0.2028493	197	-0.1714227	197	-0.1435747	197	-0.1634995	197	-0.1289499	197	-0.1416509	197	-0.1744633
197.2	1.000468	197.2	0.9695109	197.2	1.029272	197.2	1.01611	197.2	1.035943	197.2	1.021481	197.2	1.037661	197.2	-0.2128265	197.2	-0.1485803	197.2	-0.1980985	197.2	-0.1689811	197.2	-0.1426018	197.2	-0.1709948	197.2	-0.1270477	197.2	-0.1404773	197.2	-0.1730236
197.4	1.00201	197.4	0.9686993	197.4	1.029971	197.4	1.01823	197.4	1.037439	197.4	1.021919	197.4	1.034079	197.4	-0.2113097	197.4	-0.1467144	197.4	-0.2057308	197.4	-0.1712273	197.4	-0.1414959	197.4	-0.1653893	197.4	-0.130542	197.4	-0.1363837	197.4	-0.173293
197.6	1.003611	197.6	0.9669346	197.6	1.028784	197.6	1.021969	197.6	1.034451	197.6	1.018904	197.6	1.033279	197.6	-0.2078119	197.6	-0.1512715	197.6	-0.201608	197.6	-0.1701314	197.6	-0.1444217	197.6	-0.1655443	197.6	-0.1294375	197.6	-0.1345607	197.6	-0.1773507
197.8	1.006481	197.8	0.9678864	197.8	1.030017	197.8	1.015367	197.8	1.039472	197.8	1.017751	197.8	1.035792	197.8	-0.2099797	197.8	-0.1462753	197.8	-0.2023774	197.8	-0.1702105	197.8	-0.137564	197.8	-0.1633927	197.8	-0.1295379	197.8	-0.1388271	197.8	-0.1771187
198	1.002553	198	0.9718286	198	1.030823	198	1.018403	198	1.03666	198	1.018291	198	1.037667	198	-0.2154944	198	-0.1462982	198	-0.2005437	198	-0.172029	198	-0.1434285	198	-0.1656411	198	-0.1298939	198	-0.1404625	198	-0.170002
198.2	1.001138	198.2	0.9672024	198.2	1.031269	198.2	1.026613	198.2	1.0375	198.2	1.017432	198.2	1.037896	198.2	-0.2094022	198.2	-0.1489387	198.2	-0.199103	198.2	-0.1690947	198.2	-0.1437278	198.2	-0.1687053	198.2	-0.1252255	198.2	-0.138053	198.2	-0.1717686
198.4	1.001346	198.4	0.9712732	198.4	1.029157	198.4	1.023698	198.4	1.037799	198.4	1.021678	198.4	1.038394	198.4	-0.2108206	198.4	-0.1506071	198.4	-0.2029548	198.4	-0.1750089	198.4	-0.1428431	198.4	-0.1638682	198.4	-0.1284493	198.4	-0.1370766	198.4	-0.1720304
198.6	0.9985397	198.6	0.970607	198.6	1.027858	198.6	1.020208	198.6	1.035622	198.6	1.01901	198.6	1.033812	198.6	-0.2122607	198.6	-0.1506505	198.6	-0.1977153	198.6	-0.1663623	198.6	-0.142373	198.6	-0.1570116	198.6	-0.1297261	198.6	-0.133634	198.6	-0.1720215
198.8	1.003539	198.8	0.9680055	198.8	1.031695	198.8	1.019284	198.8	1.037444	198.8	1.023408	198.8	1.033582	198.8	-0.2066622	198.8	-0.1443974	198.8	-0.2022382	198.8	-0.1660392	198.8	-0.1404845	198.8	-0.1654378	198.8	-0.1306491	198.8	-0.1346588	198.8	-0.1691944
199	1.007	199	0.970416	199	1.032479	199	1.019876	199	1.040009	199	1.020188	199	1.034834	199	-0.2117577	199	-0.1463487	199	-0.2069426	199	-0.1694283	199	-0.1421608	199	-0.1688238	199	-0.130839	199	-0.1373705	199	-0.1722811
199.2	0.9984697	199.2	0.9703645	199.2	1.033386	199.2	1.019901	199.2	1.036749	199.2	1.020527	199.2	1.039142	199.2	-0.2118426	199.2	-0.1441751	199.2	-0.2046898	199.2	-0.1735301	199.2	-0.1419803	199.2	-0.1659457	199.2	-0.1262762	199.2	-0.1368309	199.2	-0.1728464
199.4	0.9994951	199.4	0.9663899	199.4	1.03275	199.4	1.021953	199.4	1.033674	199.4	1.016491	199.4	1.03599	199.4	-0.213667	199.4	-0.1474104	199.4	-0.206072	199.4	-0.1689629	199.4	-0.1416228	199.4	-0.164277	199.4	-0.1268326	199.4	-0.1354465	199.4	-0.1730769
199.6	1.000257	199.6	0.9711884	199.6	1.032703	199.6	1.025723	199.6	1.03538	199.6	1.025072	199.6	1.040756	199.6	-0.2115177	199.6	-0.14934	199.6	-0.200365	199.6	-0.1681649	199.6	-0.1427319	199.6	-0.1642158	199.6	-0.1294665	199.6	-0.1394357	199.6	-0.1722047
199.8	1.0024	199.8	0.9682571	199.8	1.031125	199.8	1.022817	199.8	1.037117	199.8	1.024292	199.8	1.037631	199.8	-0.2103596	199.8	-0.1441859	199.8	-0.2014484	199.8	-0.1687938	199.8	-0.1420199	199.8	-0.1635136	199.8	-0.1282781	199.8	-0.1374422	199.8	-0.1684805
200	0.9782546	200	0.9489986	200	1.001656	200	0.9954552	200	1.021224	200	0.9989492	200	1.008707	200	-0.2339804	200	-0.1706095	200	-0.2252155	200	-0.1968321	200	-0.1657805	200	-0.1832583	200	-0.1489838	200	-0.1597647	200	-0.1983605
200.2	0.9835834	200.2	0.9463867	200.2	1.007967	200.2	0.9991536	200.2	1.020768	200.2	1.00142	200.2	1.008168	200.2	-0.2304574	200.19	-0.1690549	200.19	-0.2255371	200.19	-0.1882071	200.19	-0.1671848	200.19	-0.1797833	200.19	-0.1456932	200.19	-0.1576717	200.19	-0.1910177
200.4	0.9827121	200.4	0.945868	200.4	1.011088	200.4	0.9984341	200.4	1.016639	200.4	0.9997458	200.4	1.004508	200.4	-0.2297895	200.4	-0.1656632	200.4	-0.2220479	200.4	-0.1933183	200.4	-0.1629805	200.4	-0.1807702	200.4	-0.1487626	200.4	-0.1579007	200.4	-0.1882128
200.6	0.982864	200.6	0.9493911	200.6	1.005508	200.6	0.9982226	200.6	1.018129	200.6	1.001017	200.6	1.008782	200.6	-0.2361597	200.6	-0.1658294	200.6	-0.2179034	200.6	-0.1891148	200.6	-0.1586884	200.6	-0.179208	200.6	-0.1418297	200.6	-0.1584878	200.6	-0.1888096
200.8	0.9823108	200.8	0.9530126	200.8	1.007505	200.8	1.000478	200.8	1.023053	200.8	1.002351	200.8	1.007915	200.8	-0.2277839	200.79	-0.1680462	200.79	-0.219062	200.79	-0.1912394	200.79	-0.1602898	200.79	-0.1785631	200.79	-0.1443588	200.79	-0.1584484	200.79	-0.1909873
201	0.9852567	201	0.9481007	201	1.016035	201	1.005798	201	1.020243	201	1.004389	201	1.010214	201	-0.2266238	201	-0.1642549	201	-0.2189894	201	-0.1892978	201	-0.157571	201	-0.1782951	201	-0.1425404	201	-0.1589462	201	-0.1862931
201.2	0.9896442	201.2	0.9571368	201.2	1.014628	201.2	0.997188	201.2	1.022661	201.2	1.000976	201.2	1.011697	201.2	-0.2284877	201.2	-0.1636658	201.2	-0.2158682	201.2	-0.1867599	201.2	-0.1595338	201.2	-0.1818901	201.2	-0.1373096	201.2	-0.1486637	201.2	-0.1877831
201.4	0.9907357	201.4	0.9544762	201.4	1.01255	201.4	1.001332	201.4	1.024258	201.4	1.003071	201.4	1.013882	201.4	-0.2279158	201.4	-0.1623063	201.4	-0.2192734	201.4	-0.1856302	201.4	-0.1616604	201.4	-0.1785188	201.4	-0.143936	201.4	-0.1557098	201.4	-0.1852951
201.6	0.9917278	201.6	0.9587585	201.6	1.009912	201.6	1.000541	201.6	1.025746	201.6	1.005194	201.6	1.013792	201.6	-0.2263488	201.6	-0.1580957	201.6	-0.2182468	201.6	-0.1811819	201.6	-0.1580006	201.6	-0.1798876	201.6	-0.1431227	201.6	-0.1559666	201.6	-0.1832383
201.8	0.9893957	201.8	0.9554724	201.8	1.01097	201.8	1.003955	201.8	1.022232	201.8	1.001247	201.8	1.007758	201.8	-0.2268048	201.8	-0.1592474	201.8	-0.2181487	201.8	-0.1848202	201.8	-0.159322	201.8	-0.1780185	201.8	-0.1409764	201.8	-0.1573144	201.8	-0.1831065
202	0.9938056	202	0.9543309	202	1.015659	202	1.000761	202	1.024707	202	1.004847	202	1.011439	202	-0.2236234	202	-0.1589914	202	-0.2173144	202	-0.1853854	202	-0.1554625	202	-0.1773505	202	-0.143263	202	-0.1545918	202	-0.1863478
202.2	0.9959992	202.2	0.9543939	202.2	1.012912	202.2	1.001643	202.2	1.0158	202.2	1.004712	202.2	1.014265	202.2	-0.2249122	202.19	-0.1605279	202.19	-0.2149768	202.19	-0.1881771	202.19	-0.1544101	202.19	-0.1759378	202.19	-0.1398403	202.19	-0.1525803	202.19	-0.1798379
202.4	0.9962215	202.4	0.9592986	202.4	1.010491	202.4	1.004055	202.4	1.022056	202.4	1.008125	202.4	1.016814	202.4	-0.2210421	202.39	-0.1552182	202.39	-0.2134993	202.39	-0.1857519	202.39	-0.1601029	202.39	-0.1798383	202.39	-0.1427492	202.39	-0.1554896	202.39	-0.1821158
202.6	0.9956442	202.6	0.9584821	202.6	1.013031	202.6	1.000453	202.6	1.024374	202.6	1.00327	202.6	1.014076	202.6	-0.2223553	202.6	-0.159118	202.6	-0.219178	202.6	-0.1828465	202.6	-0.1516231	202.6	-0.1784233	202.6	-0.1419277	202.6	-0.1516723	202.6	-0.1767388
202.8	0.9972656	202.8	0.9602641	202.8	1.013445	202.8	1.006936	202.8	1.021547	202.8	1.00326	202.8	1.009077	202.8	-0.22242	202.8	-0.1530245	202.8	-0.2155071	202.8	-0.1825892	202.8	-0.1582049	202.8	-0.1788202	202.8	-0.138821	202.8	-0.155497	202.8	-0.1822112
203	0.9985381	203	0.9613003	203	1.017703	203	0.9985968	203	1.027598	203	1.003627	203	1.018932	203	-0.2251876	202.99	-0.1575492	202.99	-0.2174483	202.99	-0.1872785	202.99	-0.149595	202.99	-0.1746113	202.99	-0.1384827	202.99	-0.1525224	202.99	-0.1773806
203.2	1.003751	203.2	0.9599166	203.2	1.016898	203.2	1.000775	203.2	1.024234	203.2	1.003992	203.2	1.013101	203.2	-0.2238347	203.19	-0.1544339	203.19	-0.2172026	203.19	-0.1825202	203.19	-0.1557152	203.19	-0.1757951	203.19	-0.140242	203.19	-0.156322	203.19	-0.1810972
203.4	1.000842	203.4	0.9646162	203.4	1.017445	203.4	1.005852	203.4	1.025938	203.4	1.006469	203.4	1.012563	203.4	-0.2243954	203.4	-0.1555785	203.4	-0.2125157	203.4	-0.1841525	203.4	-0.1540463	203.4	-0.1745234	203.4	-0.1419166	203.4	-0.1496335	203.4	-0.1813429
203.6	0.9991968	203.6	0.9593511	203.6	1.016272	203.6	1.00425	203.6	1.022625	203.6	1.00483	203.6	1.015693	203.6	-0.2205679	203.6	-0.1566422	203.6	-0.2122098	203.6	-0.1859346	203.6	-0.1540644	203.6	-0.1742368	203.6	-0.1418329	203.6	-0.1508814	203.6	-0.1819032
203.8	1.00593	203.8	0.9626552	203.8	1.019776	203.8	1.004486	203.8	1.02544	203.8	1.001894	203.8	1.01702	203.8	-0.2232131	203.8	-0.1554378	203.8	-0.2160646	203.8	-0.1828572	203.8	-0.1528664	203.8	-0.1746844	203.8	-0.140802	203.8	-0.1474949	203.8	-0.1814596
204	1.006348	204	0.9679878	204	1.017296	204	1.004783	204	1.024503	204	1.009793	204	1.013164	204	-0.2200218	203.99	-0.1538996	203.99	-0.2128868	203.99	-0.1818583	203.99	-0.1550022	203.99	-0.1786012	203.99	-0.1405329	203.99	-0.1519693	203.99	-0.1789536
204.2	1.00105	204.2	0.9637133	204.2	1.019986	204.2	1.007489	204.2	1.026545	204.2	1.004732	204.2	1.018	204.2	-0.2221582	204.19	-0.1528575	204.19	-0.2126349	204.19	-0.182201	204.19	-0.1510707	204.19	-0.1758982	204.19	-0.1390099	204.19	-0.1492222	204.19	-0.1799614
204.4	1.006762	204.4	0.9664369	204.4	1.017638	204.4	1.005624	204.4	1.022443	204.4	1.0105	204.4	1.01607	204.4	-0.2244243	204.39	-0.156288	204.39	-0.2162345	204.39	-0.1820746	204.39	-0.1490619	204.39	-0.1742292	204.39	-0.1373143	204.39	-0.1530746	204.39	-0.1793346
204.6	1.004497	204.6	0.9638069	204.6	1.029303	204.6	1.001822	204.6	1.024027	204.6	1.009018	204.6	1.014143	204.6	-0.2202047	204.6	-0.156354	204.6	-0.2140183	204.6	-0.1835051	204.6	-0.1459823	204.6	-0.1746771	204.6	-0.1407137	204.6	-0.1529083	204.6	-0.1748671
204.8	1.007259	204.8	0.9619917	204.8	1.021802	204.8	1.007131	204.8	1.026464	204.8	1.006331	204.8	1.015554	204.8	-0.2190065	204.8	-0.1518205	204.8	-0.2108923	204.8	-0.1816808	204.8	-0.1521989	204.8	-0.1704412	204.8	-0.1358625	204.8	-0.149549	204.8	-0.1813921
205	1.011546	205	0.9716569	205	1.019926	205	1.005926	205	1.026571	205	1.005378	205	1.021129	205	-0.2190022	205	-0.1571113	205	-0.2128739	205	-0.1840062	205	-0.148676	205	-0.1732602	205	-0.1393646	205	-0.1529004	205	-0.1793174
205.2	1.007297	205.2	0.9710813	205.2	1.023631	205.2	1.006038	205.2	1.031789	205.2	1.008209	205.2	1.015131	205.2	-0.2184101	205.2	-0.1497322	205.2	-0.2091692	205.2	-0.1779473	205.2	-0.1530815	205.2	-0.1712605	205.2	-0.1393222	205.2	-0.1468201	205.2	-0.1798376
205.4	1.008479	205.4	0.968712	205.4	1.026056	205.4	1.006547	205.4	1.029702	205.4	1.009658	205.4	1.018683	205.4	-0.2194311	205.4	-0.1533035	205.4	-0.2163877	205.4	-0.1812191	205.4	-0.1503914	205.4	-0.1676992	205.4	-0.13849	205.4	-0.1484522	205.4	-0.1733727
205.6	1.017099	205.6	0.9746364	205.6	1.024425	205.6	1.010576	205.6	1.032883	205.6	1.00646	205.6	1.015927	205.6	-0.2151728	205.59	-0.1542639	205.59	-0.2103318	205.59	-0.180755	205.59	-0.1535137	205.59	-0.1748649	205.59	-0.1404887	205.59	-0.1493332	205.59	-0.1781689
205.8	1.011909	205.8	0.9695851	205.8	1.028606	205.8	1.009174	205.8	1.033048	205.8	1.009508	205.8	1.016282	205.8	-0.2238666	205.8	-0.1551513	205.8	-0.2050298	205.8	-0.1821907	205.8	-0.1464763	205.8	-0.1701564	205.8	-0.1335656	205.8	-0.1516761	205.8	-0.1762739
206.02	1.009822	206.02	0.9710935	206.02	1.021912	206.02	1.006823	206.02	1.028829	206.02	1.005385	206.02	1.016854	206.02	-0.2175215	205.99	-0.1521142	205.99	-0.2098945	205.99	-0.181016	205.99	-0.1515016	205.99	-0.1677946	205.99	-0.1315526	205.99	-0.1466944	205.99	-0.1746833
206.2	1.017632	206.2	0.9669256	206.2	1.024257	206.2	1.010764	206.2	1.02814	206.2	1.013127	206.2	1.019217	206.2	-0.2220682	206.2	-0.1465229	206.2	-0.2082766	206.2	-0.1791822	206.2	-0.1466269	206.2	-0.1747451	206.2	-0.1349649	206.2	-0.1490391	206.2	-0.1801582
206.4	1.010485	206.4	0.9717923	206.4	1.028766	206.4	1.015974	206.4	1.027257	206.4	1.012847	206.4	1.016399	206.4	-0.2168822	206.4	-0.1518201	206.4	-0.2095322	206.4	-0.1784153	206.4	-0.1523247	206.4	-0.1706892	206.4	-0.136783	206.4	-0.1486595	206.4	-0.1758529
206.6	1.015857	206.6	0.9739605	206.6	1.025692	206.6	1.008576	206.6	1.033168	206.6	1.010523	206.6	1.018461	206.6	-0.2156334	206.6	-0.1522626	206.6	-0.2123576	206.6	-0.1797941	206.6	-0.1505335	206.6	-0.1678533	206.6	-0.1336408	206.6	-0.1522798	206.6	-0.1760931
206.8	1.018167	206.8	0.9668373	206.8	1.026347	206.8	1.010156	206.8	1.032797	206.8	1.013696	206.8	1.01484	206.8	-0.2170278	206.8	-0.1500546	206.8	-0.210397	206.8	-0.1804897	206.8	-0.1508262	206.8	-0.1671894	206.8	-0.1280543	206.8	-0.1488089	206.8	-0.1766086
207	1.021002	207	0.9743242	207	1.023575	207	1.010165	207	1.036455	207	1.011606	207	1.021388	207	-0.2219979	206.99	-0.1508044	206.99	-0.2067894	206.99	-0.1780456	206.99	-0.1504536	206.99	-0.1714848	206.99	-0.1342855	206.99	-0.1475749	206.99	-0.1753184
207.2	1.020075	207.2	0.9733654	207.2	1.0239	207.2	1.012659	207.2	1.030417	207.2	1.012756	207.2	1.016304	207.2	-0.2184197	207.2	-0.1487834	207.2	-0.2100946	207.2	-0.1765735	207.2	-0.1506789	207.2	-0.1709044	207.2	-0.1337335	207.2	-0.1492278	207.2	-0.1751359
207.4	1.021635	207.4	0.9700136	207.4	1.024672	207.4	1.013803	207.4	1.031382	207.4	1.012075	207.4	1.023521	207.4	-0.2130261	207.39	-0.1495995	207.39	-0.2110652	207.39	-0.1816053	207.39	-0.1446584	207.39	-0.1714754	207.39	-0.1373837	207.39	-0.1503056	207.39	-0.1821139
207.6	1.021619	207.6	0.9746011	207.6	1.030602	207.6	1.015445	207.6	1.029265	207.6	1.016708	207.6	1.021771	207.6	-0.2228632	207.6	-0.1517302	207.6	-0.2084253	207.6	-0.1781291	207.6	-0.1477129	207.6	-0.1708804	207.6	-0.1382696	207.6	-0.1430905	207.6	-0.1737597
207.8	1.021005	207.8	0.970218	207.8	1.025805	207.8	1.013548	207.8	1.030946	207.8	1.011533	207.8	1.015615	207.8	-0.2174908	207.79	-0.1516165	207.79	-0.2091359	207.79	-0.1740938	207.79	-0.1476067	207.79	-0.1761111	207.79	-0.1330847	207.79	-0.1484641	207.79	-0.1778489
208	1.02474	208	0.9757221	208	1.027488	208	1.017132	208	1.033156	208	1.008416	208	1.020476	208	-0.2130084	208	-0.1508017	208	-0.207886	208	-0.171417	208	-0.1482895	208	-0.1692484	208	-0.1304366	208	-0.1489018	208	-0.1727623
208.2	1.026749	208.2	0.9730028	208.2	1.031747	208.2	1.014227	208.2	1.03152	208.2	1.012392	208.2	1.019875	208.2	-0.2171561	208.2	-0.1475025	208.2	-0.2060157	208.2	-0.1768489	208.2	-0.1524687	208.2	-0.1719383	208.2	-0.1361094	208.2	-0.1459371	208.2	-0.1745059
208.4	1.025027	208.4	0.9734229	208.4	1.02892	208.4	1.012326	208.4	1.03133	208.4	1.014999	208.4	1.014663	208.4	-0.2188443	208.39	-0.1454827	208.39	-0.2051374	208.39	-0.1762948	208.39	-0.1484854	208.39	-0.172235	208.39	-0.1366847	208.39	-0.1484794	208.39	-0.1754052
208.6	1.021285	208.6	0.9784797	208.6	1.024383	208.6	1.009033	208.6	1.028476	208.6	1.005405	208.6	1.020272	208.6	-0.2138726	208.6	-0.1483737	208.6	-0.209143	208.6	-0.1741844	208.6	-0.1471708	208.6	-0.1703272	208.6	-0.1346802	208.6	-0.1476329	208.6	-0.1745709
208.8	1.02871	208.8	0.9754531	208.8	1.026477	208.8	1.015317	208.8	1.030736	208.8	1.012677	208.8	1.014298	208.8	-0.2142452	208.8	-0.1498839	208.8	-0.2091465	208.8	-0.1757055	208.8	-0.1479122	208.8	-0.1693868	208.8	-0.1350495	208.8	-0.1443032	208.8	-0.1776577
209	1.025777	209	0.9852368	209	1.032362	209	1.013729	209	1.033583	209	1.016077	209	1.018899	209	-0.2160086	209	-0.1501297	209	-0.2044263	209	-0.1738158	209	-0.1475877	209	-0.1681227	209	-0.1349698	209	-0.1449492	209	-0.1712461
209.2	1.02567	209.2	0.9791923	209.2	1.032893	209.2	1.016217	209.2	1.030446	209.2	1.011844	209.2	1.018111	209.2	-0.2142357	209.2	-0.1484946	209.2	-0.2071434	209.2	-0.1766633	209.2	-0.1445668	209.2	-0.1660523	209.2	-0.1325768	209.2	-0.1480414	209.2	-0.173554
209.4	1.030196	209.4	0.9750739	209.4	1.035881	209.4	1.013648	209.4	1.033003	209.4	1.012694	209.4	1.016726	209.4	-0.2178756	209.39	-0.1484963	209.39	-0.2102973	209.39	-0.1793752	209.39	-0.1472315	209.39	-0.1723662	209.39	-0.134516	209.39	-0.1448063	209.39	-0.1762376
209.6	1.030531	209.6	0.976118	209.6	1.032354	209.6	1.016372	209.6	1.037454	209.6	1.017755	209.6	1.017128	209.6	-0.2157015	209.6	-0.1470358	209.6	-0.2059886	209.6	-0.1743116	209.6	-0.1450772	209.6	-0.1679308	209.6	-0.1313151	209.6	-0.1492981	209.6	-0.1695329
209.8	1.027127	209.8	0.983263	209.8	1.027342	209.8	1.018388	209.8	1.036372	209.8	1.012657	209.8	1.023034	209.8	-0.2150651	209.8	-0.1510177	209.8	-0.2060326	209.8	-0.1684734	209.8	-0.1457482	209.8	-0.1679447	209.8	-0.1349024	209.8	-0.1446558	209.8	-0.1691963
210	1.030287	210	0.9819192	210	1.030516	210	1.015738	210	1.037848	210	1.018648	210	1.019951	210	-0.2130498	209.99	-0.1477134	209.99	-0.2049287	209.99	-0.1734632	209.99	-0.145528	209.99	-0.1693184	209.99	-0.1310166	209.99	-0.1474142	209.99	-0.171697
210.2	1.032652	210.2	0.9802353	210.2	1.027872	210.2	1.012856	210.2	1.038286	210.2	1.018007	210.2	1.02185	210.2	-0.2167452	210.19	-0.1494576	210.19	-0.2073497	210.19	-0.1736153	210.19	-0.1465963	210.19	-0.1678176	210.19	-0.1298106	210.19	-0.1511862	210.19	-0.1745693
210.4	1.034694	210.4	0.9811425	210.4	1.030427	210.4	1.017218	210.4	1.039002	210.4	1.016967	210.4	1.024414	210.4	-0.2188552	210.39	-0.1466721	210.39	-0.2074853	210.39	-0.1754337	210.39	-0.1469845	210.39	-0.1667467	210.39	-0.1324876	210.39	-0.1433132	210.39	-0.1696221
210.6	1.032879	210.6	0.9840707	210.6	1.030119	210.6	1.018256	210.6	1.034178	210.6	1.012771	210.6	1.024215	210.6	-0.2118611	210.6	-0.1456526	210.6	-0.2047131	210.6	-0.1709326	210.6	-0.1432653	210.6	-0.164398	210.6	-0.134116	210.6	-0.1422311	210.6	-0.1692885
210.8	1.029961	210.8	0.9833168	210.8	1.033242	210.8	1.012823	210.8	1.029294	210.8	1.015095	210.8	1.014888	210.8	-0.2180085	210.79	-0.1497576	210.79	-0.2028949	210.79	-0.1732418	210.79	-0.146081	210.79	-0.1671485	210.79	-0.1321188	210.79	-0.1470324	210.79	-0.1717183
211	1.029642	211	0.9848124	211	1.028645	211	1.018446	211	1.036182	211	1.013061	211	1.020921	211	-0.2175172	211	-0.1491716	211	-0.20543	211	-0.1721335	211	-0.1456532	211	-0.1673226	211	-0.1297254	211	-0.1436355	211	-0.1717675
211.2	1.036906	211.2	0.9837212	211.2	1.032865	211.2	1.016541	211.2	1.030242	211.2	1.019276	211.2	1.021908	211.2	-0.2150451	211.19	-0.1476314	211.19	-0.2027762	211.19	-0.1766618	211.19	-0.1478306	211.19	-0.1667767	211.19	-0.1291149	211.19	-0.1464052	211.19	-0.1701468
211.4	1.036998	211.4	0.9834136	211.4	1.033234	211.4	1.020001	211.4	1.036648	211.4	1.015333	211.4	1.022315	211.4	-0.2140204	211.39	-0.1471241	211.39	-0.2018082	211.39	-0.1710696	211.39	-0.1475812	211.39	-0.1640089	211.39	-0.1314696	211.39	-0.1412887	211.39	-0.1707193
211.6	1.034199	211.6	0.9836202	211.6	1.037118	211.6	1.024218	211.6	1.031615	211.6	1.016573	211.6	1.019197	211.6	-0.2138874	211.6	-0.1468871	211.6	-0.2074115	211.6	-0.1750181	211.6	-0.1458307	211.6	-0.1709629	211.6	-0.1320699	211.6	-0.1458343	211.6	-0.1718194
211.8	1.032933	211.8	0.983426	211.8	1.036968	211.8	1.020395	211.8	1.037519	211.8	1.018167	211.8	1.021031	211.8	-0.2162896	211.79	-0.1477349	211.79	-0.2000976	211.79	-0.1734296	211.79	-0.1424343	211.79	-0.1651153	211.79	-0.1307255	211.79	-0.1457153	211.79	-0.1739529
212	1.033096	212	0.9804249	212	1.033794	212	1.021765	212	1.035595	212	1.017205	212	1.022632	212	-0.2145573	211.99	-0.1462568	211.99	-0.201812	211.99	-0.1722246	211.99	-0.1433226	211.99	-0.1664448	211.99	-0.1360154	211.99	-0.1414339	211.99	-0.1719252
212.2	1.032466	212.2	0.9867361	212.2	1.033399	212.2	1.018677	212.2	1.036282	212.2	1.013779	212.2	1.023338	212.2	-0.2118262	212.19	-0.1457428	212.19	-0.2003027	212.19	-0.1711255	212.19	-0.1436126	212.19	-0.1689641	212.19	-0.1296492	212.19	-0.1480283	212.19	-0.1709764
212.4	1.035951	212.4	0.985075	212.4	1.037066	212.4	1.013418	212.4	1.034471	212.4	1.023629	212.4	1.023805	212.4	-0.2152293	212.39	-0.1421235	212.39	-0.1985307	212.39	-0.1729303	212.39	-0.1444905	212.39	-0.1636073	212.39	-0.1274865	212.39	-0.143424	212.39	-0.1693597
212.6	1.037747	212.6	0.984722	212.6	1.039564	212.6	1.023727	212.6	1.032225	212.6	1.013847	212.6	1.021694	212.6	-0.209923	212.59	-0.1425205	212.59	-0.2011533	212.59	-0.1705258	212.59	-0.1446706	212.59	-0.1647315	212.59	-0.1273352	212.59	-0.1425129	212.59	-0.1751368
212.8	1.036739	212.8	0.9882887	212.8	1.03749	212.8	1.017332	212.8	1.034162	212.8	1.018741	212.8	1.023967	212.8	-0.2142709	212.8	-0.1471213	212.8	-0.202565	212.8	-0.1709146	212.8	-0.1462656	212.8	-0.16249	212.8	-0.1300921	212.8	-0.1414528	212.8	-0.1680897
213	1.038907	213	0.9895551	213	1.036616	213	1.018053	213	1.036079	213	1.024505	213	1.025718	213	-0.2084596	212.99	-0.1439161	212.99	-0.2021416	212.99	-0.1780728	212.99	-0.1431898	212.99	-0.1619215	212.99	-0.1272594	212.99	-0.143193	212.99	-0.1683265
213.2	1.041543	213.2	0.9876134	213.2	1.039203	213.2	1.018585	213.2	1.037399	213.2	1.018866	213.2	1.017925	213.2	-0.2126421	213.19	-0.1443178	213.19	-0.2011707	213.19	-0.1737031	213.19	-0.1420376	213.19	-0.1633827	213.19	-0.1288512	213.19	-0.1437479	213.19	-0.1687596
213.4	1.040387	213.4	0.9875759	213.4	1.039157	213.4	1.018956	213.4	1.037902	213.4	1.013496	213.4	1.022923	213.4	-0.2128389	213.39	-0.1453456	213.39	-0.2004998	213.39	-0.1706739	213.39	-0.1422158	213.39	-0.1648645	213.39	-0.1240031	213.39	-0.1445526	213.39	-0.1705763
213.6	1.040795	213.6	0.985017	213.6	1.041213	213.6	1.020035	213.6	1.038596	213.6	1.020735	213.6	1.02445	213.6	-0.2109319	213.59	-0.1457713	213.59	-0.2000509	213.59	-0.1711823	213.59	-0.1452506	213.59	-0.1659865	213.59	-0.1284271	213.59	-0.1401709	213.59	-0.1687729
213.8	1.040834	213.8	0.9904636	213.8	1.033192	213.8	1.018635	213.8	1.037867	213.8	1.020664	213.8	1.022891	213.8	-0.2124456	213.8	-0.1432919	213.8	-0.2066661	213.8	-0.1719558	213.8	-0.1441661	213.8	-0.1627121	213.8	-0.1272657	213.8	-0.1383997	213.8	-0.1700116
214	1.040679	214	0.9884031	214	1.038636	214	1.021486	214	1.038761	214	1.019596	214	1.020937	214	-0.2103312	214	-0.147197	214	-0.2021926	214	-0.1710091	214	-0.1450563	214	-0.1670362	214	-0.1243548	214	-0.1429167	214	-0.1683444
214.2	1.037272	214.2	0.9895946	214.2	1.041267	214.2	1.021284	214.2	1.040614	214.2	1.018843	214.2	1.027964	214.2	-0.2109118	214.19	-0.1451209	214.19	-0.1969704	214.19	-0.1755329	214.19	-0.1434102	214.19	-0.1621777	214.19	-0.1279477	214.19	-0.143879	214.19	-0.1663139
214.4	1.039425	214.4	0.9901409	214.4	1.040841	214.4	1.019402	214.4	1.035966	214.4	1.021711	214.4	1.021726	214.4	-0.2104689	214.39	-0.1421331	214.39	-0.2010352	214.39	-0.1732051	214.39	-0.1443788	214.39	-0.164702	214.39	-0.1314976	214.39	-0.1383533	214.39	-0.1667512
214.6	1.040749	214.6	0.9903837	214.6	1.041554	214.6	1.018454	214.6	1.034729	214.6	1.014998	214.6	1.024988	214.6	-0.2119838	214.59	-0.1450631	214.59	-0.1958389	214.59	-0.170908	214.59	-0.1421877	214.59	-0.1638715	214.59	-0.1255336	214.59	-0.1416275	214.59	-0.1723622
214.8	1.04628	214.8	0.9896656	214.8	1.038324	214.8	1.020087	214.8	1.041341	214.8	1.017438	214.8	1.026883	214.8	-0.2111836	214.79	-0.1407648	214.79	-0.2013196	214.79	-0.1707637	214.79	-0.1409898	214.79	-0.1639359	214.79	-0.126872	214.79	-0.1425139	214.79	-0.1673908
215	1.044883	215	0.9878299	215	1.039368	215	1.022309	215	1.038778	215	1.021516	215	1.021183	215	-0.2094138	215	-0.1448263	215	-0.2016319	215	-0.1705913	215	-0.1464749	215	-0.1608962	215	-0.1272939	215	-0.1379902	215	-0.1737536
215.2	1.044782	215.2	0.9911056	215.2	1.040744	215.2	1.019787	215.2	1.041067	215.2	1.016473	215.2	1.030022	215.2	-0.2101022	215.19	-0.1403916	215.19	-0.2026298	215.19	-0.1726493	215.19	-0.1399052	215.19	-0.159172	215.19	-0.129205	215.19	-0.1398012	215.19	-0.1673244
215.4	1.046408	215.4	0.9917312	215.4	1.041957	215.4	1.021738	215.4	1.038756	215.4	1.021313	215.4	1.026672	215.4	-0.2100179	215.4	-0.1465269	215.4	-0.1969207	215.4	-0.1649898	215.4	-0.1393239	215.4	-0.1590688	215.4	-0.1307204	215.4	-0.1440879	215.4	-0.167808
215.6	1.04622	215.6	0.9924969	215.6	1.042509	215.6	1.02362	215.6	1.045304	215.6	1.021227	215.6	1.026383	215.6	-0.2102294	215.59	-0.1405802	215.59	-0.2014901	215.59	-0.1655554	215.59	-0.1403066	215.59	-0.1674096	215.59	-0.1262937	215.59	-0.1432031	215.59	-0.1723106
215.8	1.048837	215.8	0.995087	215.8	1.039853	215.8	1.02315	215.8	1.045312	215.8	1.019941	215.8	1.030452	215.8	-0.2105575	215.8	-0.1390922	215.8	-0.2009244	215.8	-0.1710864	215.8	-0.1428439	215.8	-0.1609634	215.8	-0.1296455	215.8	-0.1419823	215.8	-0.1690942
216	1.047872	216	0.9938656	216	1.04049	216	1.027233	216	1.039881	216	1.022217	216	1.02486	216	-0.2112889	216	-0.1422249	216	-0.2003262	216	-0.1694025	216	-0.1398917	216	-0.1586471	216	-0.1267654	216	-0.142687	216	-0.1687807
216.2	1.041473	216.2	0.9955451	216.2	1.043759	216.2	1.023621	216.2	1.039815	216.2	1.021836	216.2	1.025235	216.2	-0.2070891	216.2	-0.1428569	216.2	-0.1987224	216.2	-0.1710735	216.2	-0.1374613	216.2	-0.1606495	216.2	-0.1263983	216.2	-0.1441965	216.2	-0.1670167
216.4	1.049243	216.4	0.9900246	216.4	1.043658	216.4	1.02504	216.4	1.041961	216.4	1.015492	216.4	1.025359	216.4	-0.2078399	216.4	-0.140556	216.4	-0.2041913	216.4	-0.168707	216.4	-0.1378755	216.4	-0.1622144	216.4	-0.1297893	216.4	-0.1387432	216.4	-0.1689071
216.6	1.0442	216.6	0.9973421	216.6	1.043368	216.6	1.022652	216.6	1.039301	216.6	1.019533	216.6	1.025649	216.6	-0.2082694	216.6	-0.1383356	216.6	-0.2018252	216.6	-0.1702473	216.6	-0.1420435	216.6	-0.1631533	216.6	-0.1287937	216.6	-0.1396099	216.6	-0.1701688
216.8	1.050372	216.8	0.9948407	216.8	1.04012	216.8	1.022978	216.8	1.043919	216.8	1.022609	216.8	1.026377	216.8	-0.2114273	216.8	-0.1375721	216.8	-0.2021265	216.8	-0.1661527	216.8	-0.1367062	216.8	-0.1580462	216.8	-0.1254468	216.8	-0.1349614	216.8	-0.1684482
217	1.043487	217	0.9965245	217	1.040153	217	1.024869	217	1.04154	217	1.021965	217	1.026709	217	-0.2096675	216.99	-0.137353	216.99	-0.1981189	216.99	-0.1648687	216.99	-0.1414682	216.99	-0.1645765	216.99	-0.1239342	216.99	-0.1386361	216.99	-0.1645645
217.2	1.05143	217.2	0.9963135	217.2	1.041833	217.2	1.029019	217.2	1.044567	217.2	1.019249	217.2	1.025109	217.2	-0.2046178	217.2	-0.1400464	217.2	-0.2003371	217.2	-0.1668321	217.2	-0.1385957	217.2	-0.1607758	217.2	-0.1293353	217.2	-0.1380342	217.2	-0.1651712
217.4	1.049361	217.4	0.998502	217.4	1.039888	217.4	1.025549	217.4	1.043903	217.4	1.021216	217.4	1.025342	217.4	-0.2096594	217.4	-0.1376498	217.4	-0.2008912	217.4	-0.1685475	217.4	-0.1379813	217.4	-0.1631155	217.4	-0.1272689	217.4	-0.1348934	217.4	-0.1686138
217.6	1.052992	217.6	0.9973533	217.6	1.045092	217.6	1.026932	217.6	1.047096	217.6	1.021768	217.6	1.029605	217.6	-0.2073925	217.6	-0.1382017	217.6	-0.1974804	217.6	-0.1657686	217.6	-0.1348379	217.6	-0.1597388	217.6	-0.1244532	217.6	-0.1407912	217.6	-0.1701864
217.8	1.048055	217.8	0.993273	217.8	1.047286	217.8	1.025104	217.8	1.04803	217.8	1.026476	217.8	1.022364	217.8	-0.2061261	217.8	-0.1399235	217.8	-0.1922065	217.8	-0.168144	217.8	-0.1436424	217.8	-0.1625583	217.8	-0.128772	217.8	-0.1371628	217.8	-0.1651077
218	1.050696	218	0.9975952	218	1.042075	218	1.025015	218	1.045066	218	1.021416	218	1.028373	218	-0.2056626	218	-0.1443	218	-0.1987695	218	-0.1640769	218	-0.1369922	218	-0.1642927	218	-0.1245189	218	-0.1378708	218	-0.1687619
218.2	1.055789	218.2	0.9982507	218.2	1.045528	218.2	1.024605	218.2	1.041131	218.2	1.023146	218.2	1.030126	218.2	-0.2107788	218.2	-0.1361802	218.2	-0.1953281	218.2	-0.1676085	218.2	-0.1389594	218.2	-0.1540043	218.2	-0.1272353	218.2	-0.1377178	218.2	-0.1648207
218.4	1.049663	218.4	1.004104	218.4	1.047283	218.4	1.025659	218.4	1.043095	218.4	1.020236	218.4	1.033054	218.4	-0.2126179	218.4	-0.1402871	218.4	-0.2004158	218.4	-0.1692699	218.4	-0.1401061	218.4	-0.1608988	218.4	-0.1276392	218.4	-0.1385758	218.4	-0.1650075
218.6	1.050901	218.6	1.001509	218.6	1.043304	218.6	1.026882	218.6	1.04097	218.6	1.024431	218.6	1.029187	218.6	-0.205373	218.6	-0.1372575	218.6	-0.1969323	218.6	-0.1685365	218.6	-0.1406166	218.6	-0.1584759	218.6	-0.1264325	218.6	-0.1387187	218.6	-0.1687678
218.8	1.051226	218.8	1.000934	218.8	1.045846	218.8	1.023078	218.8	1.041441	218.8	1.023378	218.8	1.029573	218.8	-0.2088913	218.8	-0.1382576	218.8	-0.1996609	218.8	-0.164377	218.8	-0.1407485	218.8	-0.1584613	218.8	-0.1272113	218.8	-0.1356126	218.8	-0.1689018
219	1.052962	219	1.000767	219	1.048147	219	1.026783	219	1.038506	219	1.021648	219	1.027984	219	-0.2056739	219	-0.1395714	219	-0.197722	219	-0.1714334	219	-0.1374679	219	-0.1601053	219	-0.1284067	219	-0.1373204	219	-0.1658161
219.2	1.051107	219.2	0.999606	219.2	1.043198	219.2	1.033215	219.2	1.040696	219.2	1.022817	219.2	1.029077	219.2	-0.2074885	219.2	-0.13766	219.2	-0.1975195	219.2	-0.1674667	219.2	-0.1370278	219.2	-0.16216	219.2	-0.1228046	219.2	-0.1379971	219.2	-0.1663531
219.4	1.058546	219.4	1.003309	219.4	1.049576	219.4	1.029369	219.4	1.041604	219.4	1.0258	219.4	1.031163	219.4	-0.2076742	219.39	-0.1413173	219.39	-0.1955687	219.39	-0.1637186	219.39	-0.1360927	219.39	-0.1598834	219.39	-0.1223143	219.39	-0.1358153	219.39	-0.168645
219.6	1.056766	219.6	1.000088	219.6	1.046961	219.6	1.023253	219.6	1.042135	219.6	1.024607	219.6	1.032609	219.6	-0.2041934	219.6	-0.1400873	219.6	-0.1958061	219.6	-0.1704679	219.6	-0.137805	219.6	-0.1591415	219.6	-0.1256188	219.6	-0.1368739	219.6	-0.1630208
219.8	1.057563	219.8	1.001471	219.8	1.046628	219.8	1.022275	219.8	1.040729	219.8	1.025412	219.8	1.031813	219.8	-0.208996	219.8	-0.139968	219.8	-0.1899611	219.8	-0.1652482	219.8	-0.1417637	219.8	-0.1574054	219.8	-0.1253116	219.8	-0.139954	219.8	-0.162567
220	1.05525	220	1.002111	220	1.045334	220	1.030063	220	1.041869	220	1.030076	220	1.033822	220	-0.2075265	220	-0.1361612	220	-0.1955722	220	-0.1676214	220	-0.1346456	220	-0.1616575	220	-0.1288451	220	-0.1403255	220	-0.1659629
220.2	1.057122	220.2	0.9983162	220.2	1.044961	220.2	1.027252	220.2	1.042996	220.2	1.023997	220.2	1.030198	220.2	-0.2049263	220.19	-0.1371572	220.19	-0.2019857	220.19	-0.1649863	220.19	-0.136231	220.19	-0.1593346	220.19	-0.1257134	220.19	-0.1364788	220.19	-0.1632209
220.4	1.053043	220.4	0.999998	220.4	1.045821	220.4	1.030798	220.4	1.042422	220.4	1.022127	220.4	1.033165	220.4	-0.2078001	220.4	-0.1360245	220.4	-0.2014052	220.4	-0.1657432	220.4	-0.1382984	220.4	-0.1592067	220.4	-0.1229343	220.4	-0.1366091	220.4	-0.1639003
220.6	1.058637	220.6	1.002887	220.6	1.046367	220.6	1.026598	220.6	1.043561	220.6	1.029033	220.6	1.03078	220.6	-0.2048279	220.6	-0.1358895	220.6	-0.1997024	220.6	-0.1646752	220.6	-0.1320581	220.6	-0.1601084	220.6	-0.1249539	220.6	-0.1358284	220.6	-0.1626859
220.8	1.062752	220.8	1.001721	220.8	1.048845	220.8	1.027272	220.8	1.042275	220.8	1.023666	220.8	1.028354	220.8	-0.2020224	220.8	-0.1390948	220.8	-0.1978075	220.8	-0.1663887	220.8	-0.1333375	220.8	-0.1574563	220.8	-0.1221473	220.8	-0.1344038	220.8	-0.1621347
221	1.060105	221	1.006611	221	1.046338	221	1.029828	221	1.048221	221	1.020694	221	1.029949	221	-0.2021092	221	-0.1367134	221	-0.1950372	221	-0.16532	221	-0.1381966	221	-0.1569563	221	-0.1244802	221	-0.1307759	221	-0.1649335
221.2	1.058683	221.2	0.9993269	221.2	1.046378	221.2	1.027741	221.2	1.045308	221.2	1.021793	221.2	1.028868	221.2	-0.2030438	221.2	-0.133771	221.2	-0.1968112	221.2	-0.1654157	221.2	-0.1319772	221.2	-0.1547122	221.2	-0.1232696	221.2	-0.138297	221.2	-0.1625332
221.4	1.062381	221.4	1.001184	221.4	1.051618	221.4	1.025944	221.4	1.045857	221.4	1.022994	221.4	1.031443	221.4	-0.2049752	221.4	-0.1407264	221.4	-0.1930035	221.4	-0.1650448	221.4	-0.1336163	221.4	-0.1602336	221.4	-0.1245031	221.4	-0.1354001	221.4	-0.1674859
221.6	1.055019	221.6	1.001058	221.6	1.047285	221.6	1.027262	221.6	1.038218	221.6	1.025485	221.6	1.030465	221.6	-0.2042436	221.6	-0.1351654	221.6	-0.194332	221.6	-0.168023	221.6	-0.1353823	221.6	-0.1583314	221.6	-0.1213171	221.6	-0.1408421	221.6	-0.1686138
221.8	1.061023	221.8	1.003718	221.8	1.046615	221.8	1.032323	221.8	1.044819	221.8	1.02674	221.8	1.030906	221.8	-0.2074046	221.8	-0.1343644	221.8	-0.1995887	221.8	-0.164707	221.8	-0.1385005	221.8	-0.1570966	221.8	-0.1212789	221.8	-0.138981	221.8	-0.163665
222	1.061712	222	1.004488	222	1.046019	222	1.025131	222	1.048265	222	1.024093	222	1.029934	222	-0.2093179	222	-0.1373052	222	-0.1939956	222	-0.1657809	222	-0.1390188	222	-0.1600925	222	-0.1217381	222	-0.1377817	222	-0.1639802
222.2	1.058231	222.2	1.006944	222.2	1.053474	222.2	1.026064	222.2	1.043123	222.2	1.02613	222.2	1.035462	222.2	-0.2076072	222.2	-0.1344449	222.2	-0.1922595	222.2	-0.1631911	222.2	-0.1370272	222.2	-0.1578669	222.2	-0.1222462	222.2	-0.1360923	222.2	-0.1653706
222.4	1.05882	222.4	1.006027	222.4	1.051801	222.4	1.029858	222.4	1.048787	222.4	1.027549	222.4	1.030485	222.4	-0.2063895	222.4	-0.1353321	222.4	-0.1931998	222.4	-0.1597179	222.4	-0.1328933	222.4	-0.1532114	222.4	-0.1226349	222.4	-0.1330516	222.4	-0.1650815
222.6	1.06376	222.6	1.004926	222.6	1.051829	222.6	1.03103	222.6	1.048047	222.6	1.022371	222.6	1.032802	222.6	-0.2044558	222.6	-0.1392414	222.6	-0.194108	222.6	-0.1656343	222.6	-0.1351376	222.6	-0.1582121	222.6	-0.1216163	222.6	-0.1372926	222.6	-0.1623979
222.8	1.05969	222.8	1.008911	222.8	1.04952	222.8	1.030068	222.8	1.043077	222.8	1.025692	222.8	1.032162	222.8	-0.204703	222.79	-0.1376128	222.79	-0.189857	222.79	-0.1651709	222.79	-0.1329745	222.79	-0.1564464	222.79	-0.1222944	222.79	-0.1341578	222.79	-0.1647779
223	1.064486	223	1.004857	223	1.049742	223	1.026588	223	1.04667	223	1.028006	223	1.031605	223	-0.2068601	222.99	-0.1319173	222.99	-0.1969752	222.99	-0.1628674	222.99	-0.1305634	222.99	-0.1606852	222.99	-0.1255767	222.99	-0.1412468	222.99	-0.1664584
223.2	1.06093	223.2	1.008719	223.2	1.050855	223.2	1.034775	223.2	1.053258	223.2	1.026588	223.2	1.032947	223.2	-0.2087821	223.2	-0.135418	223.2	-0.1924494	223.2	-0.1640447	223.2	-0.1403098	223.2	-0.1559964	223.2	-0.1209109	223.2	-0.1385947	223.2	-0.1642265
223.4	1.064362	223.4	1.003821	223.4	1.051884	223.4	1.031812	223.4	1.048369	223.4	1.029058	223.4	1.031414	223.4	-0.2035296	223.39	-0.1344385	223.39	-0.1934077	223.39	-0.1665871	223.39	-0.1361748	223.39	-0.1570791	223.39	-0.1215529	223.39	-0.1341557	223.39	-0.1614929
223.6	1.059608	223.6	1.008539	223.6	1.04919	223.6	1.03278	223.6	1.045697	223.6	1.034369	223.6	1.0346	223.6	-0.2039947	223.6	-0.1387683	223.6	-0.1934401	223.6	-0.1633554	223.6	-0.1351022	223.6	-0.1607395	223.6	-0.1207548	223.6	-0.1358995	223.6	-0.1678791
223.8	1.066026	223.8	1.005955	223.8	1.057419	223.8	1.033388	223.8	1.050785	223.8	1.028781	223.8	1.037454	223.8	-0.1992371	223.79	-0.1371848	223.79	-0.1926367	223.79	-0.1589783	223.79	-0.1373421	223.79	-0.1581085	223.79	-0.1198621	223.79	-0.1318236	223.79	-0.1630418
224	1.065484	224	1.008263	224	1.057246	224	1.033653	224	1.050291	224	1.029333	224	1.037253	224	-0.2040543	224	-0.1372931	224	-0.189474	224	-0.1643959	224	-0.1332959	224	-0.1548782	224	-0.1245741	224	-0.1353606	224	-0.1647224
224.21	1.065549	224.21	1.008719	224.21	1.051327	224.21	1.037005	224.21	1.044867	224.21	1.033376	224.21	1.036373	224.21	-0.2065735	224.2	-0.1354897	224.2	-0.1888657	224.2	-0.1596197	224.2	-0.1317676	224.2	-0.1511073	224.2	-0.121956	224.2	-0.130038	224.2	-0.1639136
224.4	1.063756	224.4	1.00805	224.4	1.053833	224.4	1.035148	224.4	1.048164	224.4	1.030941	224.4	1.030088	224.4	-0.2059086	224.4	-0.1348303	224.4	-0.1924155	224.4	-0.1636058	224.4	-0.132608	224.4	-0.1534525	224.4	-0.1204082	224.4	-0.1316424	224.4	-0.1612203
224.6	1.070501	224.6	1.003329	224.6	1.053635	224.6	1.034551	224.6	1.051266	224.6	1.029385	224.6	1.032339	224.6	-0.2057925	224.6	-0.1359997	224.6	-0.1942333	224.6	-0.1653462	224.6	-0.1316914	224.6	-0.1573184	224.6	-0.1211923	224.6	-0.1324224	224.6	-0.1635234
224.8	1.070215	224.8	1.008897	224.8	1.056348	224.8	1.026974	224.8	1.049584	224.8	1.02517	224.8	1.032057	224.8	-0.205815	224.8	-0.1323895	224.8	-0.1915644	224.8	-0.1638216	224.8	-0.1299737	224.8	-0.1572107	224.8	-0.1234695	224.8	-0.1357169	224.8	-0.1606946
225	1.066298	225	1.011263	225	1.05736	225	1.03312	225	1.047077	225	1.028162	225	1.034963	225	-0.2057277	224.99	-0.135631	224.99	-0.1953502	224.99	-0.1594715	224.99	-0.1313563	224.99	-0.1543584	224.99	-0.1219493	224.99	-0.1297214	224.99	-0.1586585
225.2	1.064975	225.2	1.011147	225.2	1.052388	225.2	1.033987	225.2	1.051803	225.2	1.028617	225.2	1.039451	225.2	-0.2033392	225.19	-0.1311469	225.19	-0.1927907	225.19	-0.1622974	225.19	-0.1306823	225.19	-0.1532467	225.19	-0.1225025	225.19	-0.1333203	225.19	-0.1605658
225.4	1.067216	225.4	1.005655	225.4	1.05455	225.4	1.036107	225.4	1.049895	225.4	1.029	225.4	1.031533	225.4	-0.2039167	225.4	-0.1306244	225.4	-0.1938544	225.4	-0.1608579	225.4	-0.1338477	225.4	-0.1587283	225.4	-0.1178743	225.4	-0.1344654	225.4	-0.166647
225.6	1.0656	225.6	1.015726	225.6	1.054646	225.6	1.030559	225.6	1.04623	225.6	1.027788	225.6	1.031778	225.6	-0.2001429	225.59	-0.1311208	225.59	-0.188333	225.59	-0.1612723	225.59	-0.1304066	225.59	-0.1523446	225.59	-0.1182479	225.59	-0.1318741	225.59	-0.1618896
225.8	1.070805	225.8	1.010066	225.8	1.054851	225.8	1.036638	225.8	1.04592	225.8	1.029912	225.8	1.036212	225.8	-0.2028943	225.79	-0.1356791	225.79	-0.1927766	225.79	-0.160819	225.79	-0.1290778	225.79	-0.1561829	225.79	-0.1209043	225.79	-0.1346581	225.79	-0.1616785
226	1.072778	226	1.015792	226	1.059028	226	1.034157	226	1.049838	226	1.027875	226	1.037454	226	-0.1977497	226	-0.1363045	226	-0.1928078	226	-0.1554109	226	-0.1328389	226	-0.1543475	226	-0.1219901	226	-0.1331654	226	-0.1624338
226.2	1.076136	226.2	1.009253	226.2	1.053963	226.2	1.032003	226.2	1.051306	226.2	1.03244	226.2	1.032682	226.2	-0.2021121	226.2	-0.1344129	226.2	-0.1918956	226.2	-0.1575228	226.2	-0.1327649	226.2	-0.1517385	226.2	-0.1195103	226.2	-0.1304675	226.2	-0.1587343
226.4	1.070433	226.4	1.011427	226.4	1.057207	226.4	1.035123	226.4	1.049273	226.4	1.033879	226.4	1.033666	226.4	-0.2017627	226.4	-0.1349097	226.4	-0.1898167	226.4	-0.1575445	226.4	-0.1324323	226.4	-0.1491229	226.4	-0.1203855	226.4	-0.1322828	226.4	-0.1622127
226.6	1.074257	226.6	1.010679	226.6	1.058689	226.6	1.03283	226.6	1.054044	226.6	1.029587	226.6	1.038678	226.6	-0.2016855	226.6	-0.1341954	226.6	-0.1921962	226.6	-0.1544712	226.6	-0.1308612	226.6	-0.1511616	226.6	-0.11811	226.6	-0.1337729	226.6	-0.1596377
226.8	1.07006	226.8	1.011426	226.8	1.056299	226.8	1.032208	226.8	1.052365	226.8	1.03058	226.8	1.030763	226.8	-0.1989811	226.79	-0.1342498	226.79	-0.1897235	226.79	-0.1610022	226.79	-0.1306271	226.79	-0.149101	226.79	-0.1192155	226.79	-0.132693	226.79	-0.1625346
227	1.072892	227	1.01211	227	1.05951	227	1.034488	227	1.050024	227	1.031356	227	1.03366	227	-0.2000672	227	-0.1328836	227	-0.1932965	227	-0.1577243	227	-0.1343142	227	-0.1474945	227	-0.1121749	227	-0.1308058	227	-0.155911
227.2	1.07362	227.2	1.011735	227.2	1.057843	227.2	1.031646	227.2	1.053934	227.2	1.03043	227.2	1.040121	227.2	-0.2041512	227.19	-0.1298562	227.19	-0.1895797	227.19	-0.1575169	227.19	-0.1294942	227.19	-0.1540046	227.19	-0.1171166	227.19	-0.1286568	227.19	-0.1545603
227.4	1.072401	227.4	1.013173	227.4	1.053577	227.4	1.03512	227.4	1.053343	227.4	1.03019	227.4	1.033035	227.4	-0.2020279	227.4	-0.1295545	227.4	-0.1860976	227.4	-0.1585984	227.4	-0.1334236	227.4	-0.1554345	227.4	-0.121249	227.4	-0.1303608	227.4	-0.1625536
227.6	1.074527	227.6	1.016614	227.6	1.060987	227.6	1.034222	227.6	1.053599	227.6	1.031499	227.6	1.039053	227.6	-0.1999696	227.6	-0.1337156	227.6	-0.1920647	227.6	-0.1588901	227.6	-0.1293632	227.6	-0.1524818	227.6	-0.1199002	227.6	-0.1313608	227.6	-0.1624759
227.8	1.068629	227.8	1.014479	227.8	1.056725	227.8	1.035051	227.8	1.049469	227.8	1.029404	227.8	1.040127	227.8	-0.1976566	227.8	-0.128229	227.8	-0.1883112	227.8	-0.1586304	227.8	-0.1304286	227.8	-0.1531038	227.8	-0.1165551	227.8	-0.127669	227.8	-0.1590714
228	1.071949	228	1.0099	228	1.061705	228	1.034634	228	1.048531	228	1.030479	228	1.039641	228	-0.1998912	227.99	-0.1321678	227.99	-0.1904736	227.99	-0.1606704	227.99	-0.1330476	227.99	-0.1538347	227.99	-0.121967	227.99	-0.1292485	227.99	-0.1629027
228.2	1.07345	228.2	1.014188	228.2	1.063204	228.2	1.037078	228.2	1.056153	228.2	1.035464	228.2	1.040798	228.2	-0.2058191	228.19	-0.132555	228.19	-0.1881507	228.19	-0.1553412	228.19	-0.1306435	228.19	-0.1499121	228.19	-0.11895	228.19	-0.128479	228.19	-0.157908
228.4	1.073063	228.4	1.015799	228.4	1.059805	228.4	1.035021	228.4	1.052142	228.4	1.026789	228.4	1.036329	228.4	-0.1988327	228.4	-0.1307885	228.4	-0.1853159	228.4	-0.1608224	228.4	-0.1313103	228.4	-0.1501961	228.4	-0.120396	228.4	-0.1264511	228.4	-0.1618011
228.6	1.073148	228.6	1.012785	228.6	1.062482	228.6	1.038359	228.6	1.05308	228.6	1.029189	228.6	1.032719	228.6	-0.2048002	228.59	-0.1292342	228.59	-0.1845695	228.59	-0.1568205	228.59	-0.1297354	228.59	-0.1511668	228.59	-0.1177606	228.59	-0.1306341	228.59	-0.1590213
228.8	1.073693	228.8	1.014042	228.8	1.062422	228.8	1.034368	228.8	1.057106	228.8	1.030272	228.8	1.037479	228.8	-0.1984438	228.8	-0.1311128	228.8	-0.1867767	228.8	-0.1591071	228.8	-0.1310938	228.8	-0.1546725	228.8	-0.1195443	228.8	-0.1297144	228.8	-0.1627787
229	1.074776	229	1.019369	229	1.058942	229	1.035203	229	1.054859	229	1.028525	229	1.039332	229	-0.2022467	229	-0.1307952	229	-0.1838284	229	-0.1632599	229	-0.1274315	229	-0.1488247	229	-0.1201398	229	-0.1276454	229	-0.1551005
229.2	1.079973	229.2	1.016408	229.2	1.060423	229.2	1.034735	229.2	1.054059	229.2	1.033501	229.2	1.03978	229.2	-0.2000516	229.2	-0.1290639	229.2	-0.1902971	229.2	-0.1564957	229.2	-0.1324047	229.2	-0.1534855	229.2	-0.1184716	229.2	-0.1284275	229.2	-0.1573884
229.4	1.079464	229.4	1.016189	229.4	1.061066	229.4	1.037216	229.4	1.055204	229.4	1.03202	229.4	1.033	229.4	-0.205099	229.39	-0.1286427	229.39	-0.1918703	229.39	-0.161017	229.39	-0.1322889	229.39	-0.1514612	229.39	-0.121075	229.39	-0.1313042	229.39	-0.1596512
229.6	1.078026	229.6	1.018667	229.6	1.064427	229.6	1.037935	229.6	1.055023	229.6	1.032573	229.6	1.036958	229.6	-0.1985312	229.6	-0.1268229	229.6	-0.1851991	229.6	-0.1563052	229.6	-0.1281005	229.6	-0.1519948	229.6	-0.1190356	229.6	-0.1281442	229.6	-0.1561766
229.8	1.076682	229.8	1.015129	229.8	1.063923	229.8	1.038765	229.8	1.056048	229.8	1.032649	229.8	1.039527	229.8	-0.2053189	229.79	-0.1338723	229.79	-0.1914342	229.79	-0.1557304	229.79	-0.1318545	229.79	-0.1535925	229.79	-0.1151855	229.79	-0.1288364	229.79	-0.1588402
230	1.079682	230	1.012988	230	1.061795	230	1.035295	230	1.056064	230	1.03206	230	1.036626	230	-0.2031869	229.99	-0.1282414	229.99	-0.1887095	229.99	-0.1586702	229.99	-0.1280911	229.99	-0.1501178	229.99	-0.1156637	229.99	-0.1263057	229.99	-0.1548817
230.2	1.076214	230.2	1.01142	230.2	1.06142	230.2	1.036833	230.2	1.054388	230.2	1.033488	230.2	1.039741	230.2	-0.2001082	230.2	-0.1286112	230.2	-0.1849656	230.2	-0.1638571	230.2	-0.1283666	230.2	-0.1492198	230.2	-0.1169912	230.2	-0.1314569	230.2	-0.1596827
230.4	1.075638	230.4	1.019404	230.4	1.065696	230.4	1.039373	230.4	1.051367	230.4	1.033706	230.4	1.039937	230.4	-0.1983808	230.4	-0.1267246	230.4	-0.1890918	230.4	-0.1563345	230.4	-0.1325313	230.4	-0.1553026	230.4	-0.1163339	230.4	-0.1319409	230.4	-0.1574561
230.6	1.083639	230.6	1.016346	230.6	1.060223	230.6	1.038215	230.6	1.052702	230.6	1.029726	230.6	1.038482	230.6	-0.1999538	230.59	-0.1308557	230.59	-0.1918873	230.59	-0.1567451	230.59	-0.1337902	230.59	-0.1475551	230.59	-0.1160947	230.59	-0.130051	230.59	-0.1574126
230.8	1.082153	230.8	1.017892	230.8	1.060962	230.8	1.039052	230.8	1.052508	230.8	1.030746	230.8	1.038526	230.8	-0.2024088	230.79	-0.1304976	230.79	-0.1928691	230.79	-0.1578848	230.79	-0.1307151	230.79	-0.1495201	230.79	-0.1175615	230.79	-0.1286734	230.79	-0.1584523
231	1.080657	231	1.018583	231	1.063211	231	1.040505	231	1.053546	231	1.033245	231	1.034486	231	-0.1947451	231	-0.1300975	231	-0.1862039	231	-0.1579817	231	-0.1281682	231	-0.1526898	231	-0.1193658	231	-0.1287416	231	-0.1589293
231.2	1.07941	231.2	1.020163	231.2	1.063341	231.2	1.038682	231.2	1.050634	231.2	1.028702	231.2	1.041782	231.2	-0.1954765	231.19	-0.1287898	231.19	-0.1850895	231.19	-0.158013	231.19	-0.1295781	231.19	-0.1477163	231.19	-0.1114991	231.19	-0.1328552	231.19	-0.1561895
231.4	1.075992	231.4	1.016	231.4	1.061287	231.4	1.038432	231.4	1.056305	231.4	1.029459	231.4	1.037751	231.4	-0.1981136	231.39	-0.1285574	231.39	-0.1874462	231.39	-0.1600228	231.39	-0.1295542	231.39	-0.1512263	231.39	-0.1139246	231.39	-0.1289997	231.39	-0.1567673
231.6	1.079822	231.6	1.019406	231.6	1.063802	231.6	1.034683	231.6	1.055599	231.6	1.030551	231.6	1.041432	231.6	-0.2024872	231.6	-0.1299566	231.6	-0.1894514	231.6	-0.1532582	231.6	-0.1293532	231.6	-0.1490451	231.6	-0.1192329	231.6	-0.1331072	231.6	-0.1566135
231.8	1.08195	231.8	1.012755	231.8	1.062964	231.8	1.042174	231.8	1.054713	231.8	1.034389	231.8	1.041967	231.8	-0.2019906	231.79	-0.1261658	231.79	-0.1855519	231.79	-0.155868	231.79	-0.1259283	231.79	-0.1461987	231.79	-0.1153483	231.79	-0.1267742	231.79	-0.1547294
232	1.082572	232	1.025392	232	1.069838	232	1.039988	232	1.057561	232	1.034077	232	1.038093	232	-0.1977201	232	-0.1278118	232	-0.1880671	232	-0.1536413	232	-0.1284495	232	-0.1498194	232	-0.1158814	232	-0.127165	232	-0.1594321
232.2	1.079561	232.2	1.024327	232.2	1.063748	232.2	1.044928	232.2	1.054296	232.2	1.034505	232.2	1.038132	232.2	-0.2003202	232.19	-0.1309364	232.19	-0.1828214	232.19	-0.1543913	232.19	-0.1316829	232.19	-0.1477051	232.19	-0.117599	232.19	-0.1274514	232.19	-0.1559409
232.4	1.080435	232.4	1.023706	232.4	1.068647	232.4	1.03937	232.4	1.053566	232.4	1.037032	232.4	1.041109	232.4	-0.194628	232.39	-0.1291111	232.39	-0.1878738	232.39	-0.1522358	232.39	-0.1267842	232.39	-0.1472782	232.39	-0.1178944	232.39	-0.1268622	232.39	-0.1566351
232.6	1.079481	232.6	1.026122	232.6	1.066248	232.6	1.039868	232.6	1.058472	232.6	1.036387	232.6	1.039078	232.6	-0.1983062	232.59	-0.1255172	232.59	-0.1833695	232.59	-0.1556253	232.59	-0.1319529	232.59	-0.1477192	232.59	-0.1187218	232.59	-0.1236258	232.59	-0.1572406
232.81	1.084048	232.81	1.022147	232.81	1.065072	232.81	1.040683	232.81	1.054736	232.81	1.033802	232.81	1.042884	232.81	-0.2001037	232.8	-0.1292759	232.8	-0.1888459	232.8	-0.1625541	232.8	-0.1290311	232.8	-0.1526843	232.8	-0.1169229	232.8	-0.1257425	232.8	-0.1547987
233	1.087551	233	1.021761	233	1.065076	233	1.039532	233	1.055018	233	1.036111	233	1.043049	233	-0.193873	232.99	-0.1250368	232.99	-0.1846919	232.99	-0.1576598	232.99	-0.1254393	232.99	-0.1483766	232.99	-0.1125875	232.99	-0.1222813	232.99	-0.1560752
233.2	1.086756	233.2	1.022386	233.2	1.064238	233.2	1.040015	233.2	1.058955	233.2	1.035855	233.2	1.042832	233.2	-0.2004404	233.19	-0.1267535	233.19	-0.1865626	233.19	-0.1576165	233.19	-0.1255026	233.19	-0.1479546	233.19	-0.1181239	233.19	-0.1269559	233.19	-0.1577196
233.4	1.08261	233.4	1.022748	233.4	1.066908	233.4	1.037971	233.4	1.061319	233.4	1.033943	233.4	1.040466	233.4	-0.2003707	233.4	-0.1293125	233.4	-0.1868899	233.4	-0.1575966	233.4	-0.1330115	233.4	-0.144379	233.4	-0.1144344	233.4	-0.1299661	233.4	-0.1539234
233.6	1.084572	233.6	1.023027	233.6	1.062331	233.6	1.039863	233.6	1.05835	233.6	1.033857	233.6	1.043941	233.6	-0.200369	233.59	-0.125246	233.59	-0.184624	233.59	-0.156471	233.59	-0.1262319	233.59	-0.1480958	233.59	-0.1150565	233.59	-0.1275169	233.59	-0.1549591
233.8	1.083397	233.8	1.020984	233.8	1.063392	233.8	1.043543	233.8	1.054705	233.8	1.038216	233.8	1.039608	233.8	-0.1952255	233.8	-0.1276173	233.8	-0.1865353	233.8	-0.1570917	233.8	-0.1270453	233.8	-0.1516923	233.8	-0.1154497	233.8	-0.1254085	233.8	-0.1561714
234	1.08638	234	1.028126	234	1.061502	234	1.043982	234	1.057118	234	1.04102	234	1.041177	234	-0.1972014	233.99	-0.1227985	233.99	-0.1834972	233.99	-0.1537718	233.99	-0.1251583	233.99	-0.1445355	233.99	-0.1109814	233.99	-0.1269532	233.99	-0.1577304
234.2	1.083102	234.2	1.021207	234.2	1.065898	234.2	1.041763	234.2	1.059619	234.2	1.036799	234.2	1.044315	234.2	-0.1939328	234.19	-0.1267395	234.19	-0.1852105	234.19	-0.1557782	234.19	-0.1276997	234.19	-0.1462254	234.19	-0.1115546	234.19	-0.1212035	234.19	-0.1530247
234.4	1.087625	234.4	1.02407	234.4	1.066505	234.4	1.04339	234.4	1.05677	234.4	1.038044	234.4	1.045436	234.4	-0.1964167	234.4	-0.1277631	234.4	-0.1867666	234.4	-0.152097	234.4	-0.123227	234.4	-0.1498456	234.4	-0.1130167	234.4	-0.1243227	234.4	-0.1524694
234.6	1.086702	234.6	1.027942	234.6	1.069311	234.6	1.044779	234.6	1.054974	234.6	1.036586	234.6	1.041048	234.6	-0.1983735	234.59	-0.1228336	234.59	-0.1854741	234.59	-0.1548238	234.59	-0.1254576	234.59	-0.1461868	234.59	-0.1153188	234.59	-0.1283468	234.59	-0.1556263
234.8	1.085428	234.8	1.025513	234.8	1.067093	234.8	1.04651	234.8	1.061517	234.8	1.036896	234.8	1.042493	234.8	-0.1959657	234.79	-0.1277876	234.79	-0.1850296	234.79	-0.1520941	234.79	-0.1265814	234.79	-0.1454868	234.79	-0.1135089	234.79	-0.1227289	234.79	-0.1535246
235	1.087361	235	1.025761	235	1.066434	235	1.04203	235	1.055565	235	1.040359	235	1.040381	235	-0.1967734	234.99	-0.1277737	234.99	-0.1856712	234.99	-0.1570466	234.99	-0.1228643	234.99	-0.1509972	234.99	-0.117368	234.99	-0.1296113	234.99	-0.1603089
235.2	1.087052	235.2	1.028165	235.2	1.061268	235.2	1.044517	235.2	1.05701	235.2	1.039216	235.2	1.043328	235.2	-0.1961352	235.19	-0.1268576	235.19	-0.1843698	235.19	-0.1548249	235.19	-0.122641	235.19	-0.1484798	235.19	-0.1149105	235.19	-0.1272711	235.19	-0.1577235
235.4	1.084176	235.4	1.031677	235.4	1.069755	235.4	1.040173	235.4	1.057228	235.4	1.035195	235.4	1.044214	235.4	-0.1982119	235.4	-0.1254663	235.4	-0.1826217	235.4	-0.1549239	235.4	-0.1280291	235.4	-0.1461144	235.4	-0.1177144	235.4	-0.1255877	235.4	-0.1602656
235.6	1.090231	235.6	1.023413	235.6	1.070728	235.6	1.047415	235.6	1.057941	235.6	1.03639	235.6	1.042988	235.6	-0.1927639	235.59	-0.1287129	235.59	-0.1819336	235.59	-0.1554584	235.59	-0.1225283	235.59	-0.146691	235.59	-0.1117283	235.59	-0.1252024	235.59	-0.1555875
235.8	1.084295	235.8	1.02493	235.8	1.066868	235.8	1.04278	235.8	1.057607	235.8	1.037925	235.8	1.043567	235.8	-0.2014623	235.79	-0.1289838	235.79	-0.1844517	235.79	-0.1529388	235.79	-0.1257784	235.79	-0.1501211	235.79	-0.1140481	235.79	-0.1246995	235.79	-0.1563522
236	1.0857	236	1.020167	236	1.07266	236	1.044311	236	1.060997	236	1.038257	236	1.042685	236	-0.1958077	235.99	-0.1273513	235.99	-0.1844874	235.99	-0.1535847	235.99	-0.1261948	235.99	-0.1492753	235.99	-0.1167318	235.99	-0.1215664	235.99	-0.1559
236.2	1.090849	236.2	1.03038	236.2	1.064664	236.2	1.043625	236.2	1.064061	236.2	1.035431	236.2	1.040965	236.2	-0.1912958	236.2	-0.1230051	236.2	-0.183831	236.2	-0.1531367	236.2	-0.1261612	236.2	-0.1481315	236.2	-0.1143934	236.2	-0.1297439	236.2	-0.155429
236.4	1.090001	236.4	1.028768	236.4	1.070622	236.4	1.042947	236.4	1.062976	236.4	1.042046	236.4	1.044194	236.4	-0.1984106	236.4	-0.1257908	236.4	-0.1829505	236.4	-0.1542955	236.4	-0.1235563	236.4	-0.1480228	236.4	-0.1113956	236.4	-0.1305148	236.4	-0.1521514
236.6	1.09064	236.6	1.025487	236.6	1.068261	236.6	1.048632	236.6	1.059876	236.6	1.042359	236.6	1.042413	236.6	-0.1910637	236.59	-0.124267	236.59	-0.1845675	236.59	-0.1542124	236.59	-0.1261148	236.59	-0.1473669	236.59	-0.1094431	236.59	-0.1235664	236.59	-0.158155
236.8	1.090677	236.8	1.02726	236.8	1.066	236.8	1.04465	236.8	1.057528	236.8	1.0387	236.8	1.040705	236.8	-0.1944879	236.8	-0.1214233	236.8	-0.185341	236.8	-0.1493971	236.8	-0.1248064	236.8	-0.1483068	236.8	-0.112196	236.8	-0.1244257	236.8	-0.1539151
237	1.091288	237	1.027402	237	1.070676	237	1.046445	237	1.06123	237	1.041644	237	1.045336	237	-0.1995182	236.99	-0.1235719	236.99	-0.18129	236.99	-0.150093	236.99	-0.1262232	236.99	-0.1471386	236.99	-0.1114871	236.99	-0.121494	236.99	-0.1527989
237.2	1.087728	237.2	1.028058	237.2	1.071966	237.2	1.046112	237.2	1.060896	237.2	1.039686	237.2	1.039175	237.2	-0.1937174	237.19	-0.1227913	237.19	-0.184876	237.19	-0.1504758	237.19	-0.1258149	237.19	-0.1471482	237.19	-0.1116588	237.19	-0.1239207	237.19	-0.1527376
237.4	1.093335	237.4	1.026579	237.4	1.070777	237.4	1.045847	237.4	1.059488	237.4	1.03921	237.4	1.043562	237.4	-0.1948082	237.39	-0.1208938	237.39	-0.1837993	237.39	-0.1517887	237.39	-0.1235324	237.39	-0.1393484	237.39	-0.1100729	237.39	-0.1231064	237.39	-0.1519043
237.6	1.092908	237.6	1.023104	237.6	1.06772	237.6	1.043339	237.6	1.054527	237.6	1.042053	237.6	1.044811	237.6	-0.1946572	237.6	-0.128337	237.6	-0.183505	237.6	-0.1495978	237.6	-0.1246423	237.6	-0.1468671	237.6	-0.1130819	237.6	-0.124464	237.6	-0.154742
237.8	1.093273	237.8	1.032449	237.8	1.073664	237.8	1.04673	237.8	1.061726	237.8	1.038704	237.8	1.044495	237.8	-0.1980219	237.79	-0.1252632	237.79	-0.1833138	237.79	-0.1556738	237.79	-0.1199031	237.79	-0.1468985	237.79	-0.1106122	237.79	-0.1228233	237.79	-0.1565823
238	1.091271	238	1.031075	238	1.065281	238	1.050933	238	1.05841	238	1.037899	238	1.044011	238	-0.192672	237.99	-0.1261173	237.99	-0.1787637	237.99	-0.1495817	237.99	-0.1212508	237.99	-0.1491613	237.99	-0.1151923	237.99	-0.128204	237.99	-0.1565394
238.2	1.093617	238.2	1.029509	238.2	1.073308	238.2	1.044346	238.2	1.060119	238.2	1.041756	238.2	1.044641	238.2	-0.1942691	238.19	-0.1257245	238.19	-0.1823969	238.19	-0.1537097	238.19	-0.1265171	238.19	-0.1462071	238.19	-0.1125421	238.19	-0.1279709	238.19	-0.1511731
238.4	1.091118	238.4	1.024408	238.4	1.070875	238.4	1.044183	238.4	1.066083	238.4	1.04031	238.4	1.046065	238.4	-0.1967562	238.39	-0.1220935	238.39	-0.1869038	238.39	-0.1564962	238.39	-0.1236116	238.39	-0.141242	238.39	-0.110589	238.39	-0.1272931	238.39	-0.1519561
238.6	1.094459	238.6	1.026613	238.6	1.073997	238.6	1.045973	238.6	1.061784	238.6	1.037515	238.6	1.044995	238.6	-0.1951381	238.59	-0.1195245	238.59	-0.1791509	238.59	-0.152872	238.59	-0.1235671	238.59	-0.1399101	238.59	-0.1137692	238.59	-0.1242255	238.59	-0.1509005
238.8	1.093366	238.8	1.026871	238.8	1.073722	238.8	1.04755	238.8	1.060433	238.8	1.03756	238.8	1.044246	238.8	-0.1936531	238.79	-0.1259045	238.79	-0.1792868	238.79	-0.147702	238.79	-0.1216221	238.79	-0.1460014	238.79	-0.1137404	238.79	-0.1232693	238.79	-0.1564916
239	1.097646	239	1.032765	239	1.073283	239	1.045181	239	1.060918	239	1.044455	239	1.047754	239	-0.1927021	239	-0.1274839	239	-0.1805799	239	-0.1545133	239	-0.1200463	239	-0.1460614	239	-0.1067709	239	-0.1240177	239	-0.1523242
239.2	1.091379	239.2	1.03441	239.2	1.072239	239.2	1.043069	239.2	1.062822	239.2	1.040236	239.2	1.047005	239.2	-0.1979113	239.2	-0.1259768	239.2	-0.1800871	239.2	-0.1525891	239.2	-0.1222223	239.2	-0.1434821	239.2	-0.1135802	239.2	-0.1250108	239.2	-0.1515568
239.4	1.09276	239.4	1.033073	239.4	1.074397	239.4	1.048306	239.4	1.06153	239.4	1.03636	239.4	1.043947	239.4	-0.1967885	239.4	-0.1242578	239.4	-0.1849495	239.4	-0.1550115	239.4	-0.121463	239.4	-0.1469855	239.4	-0.109453	239.4	-0.1192004	239.4	-0.1527732
239.6	1.092269	239.6	1.030526	239.6	1.078064	239.6	1.048134	239.6	1.061328	239.6	1.038396	239.6	1.044828	239.6	-0.1953055	239.59	-0.1214847	239.59	-0.1779246	239.59	-0.1514612	239.59	-0.1227088	239.59	-0.1457605	239.59	-0.11189	239.59	-0.1211727	239.59	-0.1536909
239.8	1.092021	239.8	1.032378	239.8	1.074581	239.8	1.050189	239.8	1.063249	239.8	1.04079	239.8	1.049827	239.8	-0.1961737	239.8	-0.1236398	239.8	-0.1829427	239.8	-0.1512211	239.8	-0.1279232	239.8	-0.1432424	239.8	-0.1125861	239.8	-0.1229307	239.8	-0.1536412
240	1.095695	240	1.032608	240	1.074976	240	1.045594	240	1.065987	240	1.042842	240	1.043164	240	-0.1900861	240	-0.1226469	240	-0.1809997	240	-0.1496389	240	-0.1213563	240	-0.1419384	240	-0.1119289	240	-0.1246818	240	-0.149849
240.2	1.099969	240.2	1.033056	240.2	1.074604	240.2	1.052012	240.2	1.062985	240.2	1.042496	240.2	1.045458	240.2	-0.1947929	240.2	-0.1240656	240.2	-0.1826984	240.2	-0.1519904	240.2	-0.1161612	240.2	-0.1495599	240.2	-0.1105569	240.2	-0.1241459	240.2	-0.1525951
240.4	1.097068	240.4	1.032828	240.4	1.077121	240.4	1.049049	240.4	1.053859	240.4	1.0413	240.4	1.045626	240.4	-0.1962648	240.4	-0.1231335	240.4	-0.1816037	240.4	-0.1515915	240.4	-0.1206955	240.4	-0.1420722	240.4	-0.1101313	240.4	-0.1215968	240.4	-0.1530419
240.6	1.095396	240.6	1.035456	240.6	1.071366	240.6	1.04394	240.6	1.063801	240.6	1.043675	240.6	1.045191	240.6	-0.1914039	240.6	-0.1225003	240.6	-0.1787485	240.6	-0.1485129	240.6	-0.1195133	240.6	-0.1448667	240.6	-0.114947	240.6	-0.1191684	240.6	-0.1531064
240.8	1.096718	240.8	1.037795	240.8	1.074095	240.8	1.046738	240.8	1.058614	240.8	1.042015	240.8	1.047956	240.8	-0.1950865	240.8	-0.1238037	240.8	-0.1827182	240.8	-0.1490079	240.8	-0.123942	240.8	-0.1400181	240.8	-0.1072515	240.8	-0.1188411	240.8	-0.1525528
241	1.096145	241	1.029776	241	1.075181	241	1.051891	241	1.063405	241	1.038894	241	1.037756	241	-0.190631	241	-0.1196221	241	-0.1813022	241	-0.1535163	241	-0.1184604	241	-0.1427479	241	-0.1071342	241	-0.1237755	241	-0.1535873
241.2	1.096914	241.2	1.028172	241.2	1.072785	241.2	1.046622	241.2	1.061122	241.2	1.041984	241.2	1.047286	241.2	-0.1913753	241.2	-0.1253049	241.2	-0.1827378	241.2	-0.1509988	241.2	-0.1187864	241.2	-0.1417073	241.2	-0.1077715	241.2	-0.1189332	241.2	-0.1502086
241.4	1.095895	241.4	1.033441	241.4	1.072976	241.4	1.049489	241.4	1.065459	241.4	1.039173	241.4	1.042928	241.4	-0.1943423	241.4	-0.1212221	241.4	-0.1787744	241.4	-0.1478574	241.4	-0.1228129	241.4	-0.1455919	241.4	-0.1047054	241.4	-0.1209149	241.4	-0.1534053
241.6	1.097086	241.6	1.032595	241.6	1.074545	241.6	1.048629	241.6	1.065341	241.6	1.03948	241.6	1.047099	241.6	-0.1945942	241.6	-0.119316	241.6	-0.1767706	241.6	-0.1513827	241.6	-0.1219099	241.6	-0.1428291	241.6	-0.1114945	241.6	-0.12137	241.6	-0.1509729
241.8	1.095231	241.8	1.036217	241.8	1.072333	241.8	1.049852	241.8	1.06342	241.8	1.043792	241.8	1.048321	241.8	-0.1891507	241.8	-0.1234959	241.8	-0.1794218	241.8	-0.1509554	241.8	-0.1211315	241.8	-0.1387498	241.8	-0.1079992	241.8	-0.1186143	241.8	-0.1494764
242	1.095042	242	1.035689	242	1.073751	242	1.049608	242	1.06047	242	1.042203	242	1.052938	242	-0.1910164	242	-0.1209143	242	-0.1812389	242	-0.1519361	242	-0.1227654	242	-0.142441	242	-0.1067452	242	-0.119458	242	-0.1501435
242.2	1.09789	242.2	1.034426	242.2	1.077705	242.2	1.04681	242.2	1.063204	242.2	1.045538	242.2	1.046161	242.2	-0.1907455	242.2	-0.1201809	242.2	-0.1799084	242.2	-0.1466986	242.2	-0.1220938	242.2	-0.1386426	242.2	-0.1087615	242.2	-0.1173785	242.2	-0.1551418
242.41	1.097838	242.41	1.034173	242.41	1.076322	242.41	1.050539	242.41	1.0647	242.41	1.038746	242.41	1.047544	242.41	-0.1891186	242.4	-0.1223704	242.4	-0.1800551	242.4	-0.1510287	242.4	-0.1172487	242.4	-0.1416447	242.4	-0.1099121	242.4	-0.1157516	242.4	-0.1535418
242.6	1.099586	242.6	1.031456	242.6	1.076247	242.6	1.046497	242.6	1.06188	242.6	1.044017	242.6	1.049349	242.6	-0.1890265	242.6	-0.1187784	242.6	-0.1829118	242.6	-0.1536537	242.6	-0.1175559	242.6	-0.142274	242.6	-0.1067776	242.6	-0.120287	242.6	-0.1525164
242.8	1.098035	242.8	1.035406	242.8	1.077737	242.8	1.050098	242.8	1.064236	242.8	1.043613	242.8	1.045986	242.8	-0.1906734	242.8	-0.1185478	242.8	-0.1811779	242.8	-0.1520244	242.8	-0.1208531	242.8	-0.1445043	242.8	-0.1123421	242.8	-0.1210807	242.8	-0.1455303
243	1.097898	243	1.032557	243	1.075125	243	1.050638	243	1.065458	243	1.036823	243	1.050173	243	-0.1957599	243	-0.1220116	243	-0.182117	243	-0.1501636	243	-0.1234241	243	-0.1435326	243	-0.1074405	243	-0.1210531	243	-0.1526644
243.2	1.101207	243.2	1.035869	243.2	1.074743	243.2	1.053755	243.2	1.064144	243.2	1.042316	243.2	1.049912	243.2	-0.1921502	243.2	-0.1218813	243.2	-0.1792006	243.2	-0.1498396	243.2	-0.1185395	243.2	-0.1450082	243.2	-0.1107118	243.2	-0.1217912	243.2	-0.1496945
243.4	1.103699	243.4	1.031802	243.4	1.079915	243.4	1.052776	243.4	1.062991	243.4	1.03908	243.4	1.048071	243.4	-0.1921563	243.4	-0.1192666	243.4	-0.1798443	243.4	-0.146652	243.4	-0.1191459	243.4	-0.1412135	243.4	-0.1084762	243.4	-0.1178892	243.4	-0.151391
243.6	1.100191	243.6	1.038375	243.6	1.081023	243.6	1.049038	243.6	1.063258	243.6	1.046123	243.6	1.046537	243.6	-0.1940561	243.6	-0.1231807	243.6	-0.1828079	243.6	-0.1464221	243.6	-0.1188672	243.6	-0.1450107	243.6	-0.1114799	243.6	-0.1214949	243.6	-0.1536444
243.8	1.101842	243.8	1.037592	243.8	1.077747	243.8	1.051196	243.8	1.064962	243.8	1.039429	243.8	1.046166	243.8	-0.1889739	243.8	-0.1200439	243.8	-0.1795952	243.8	-0.1519117	243.8	-0.1189516	243.8	-0.1413745	243.8	-0.1064361	243.8	-0.1227868	243.8	-0.1506934
244	1.104929	244	1.037723	244	1.080793	244	1.050694	244	1.065655	244	1.046997	244	1.051045	244	-0.1876971	243.99	-0.1222878	243.99	-0.180962	243.99	-0.150281	243.99	-0.1228327	243.99	-0.1383804	243.99	-0.1104219	243.99	-0.1226808	243.99	-0.1508102
244.2	1.099892	244.2	1.040275	244.2	1.074253	244.2	1.052531	244.2	1.068047	244.2	1.045315	244.2	1.04705	244.2	-0.1898489	244.2	-0.1195078	244.2	-0.1778156	244.2	-0.1509682	244.2	-0.1197791	244.2	-0.1400956	244.2	-0.1092988	244.2	-0.120474	244.2	-0.1525474
244.4	1.10059	244.4	1.03755	244.4	1.075486	244.4	1.049329	244.4	1.065921	244.4	1.042689	244.4	1.045847	244.4	-0.1935688	244.4	-0.1238765	244.4	-0.1783236	244.4	-0.1507828	244.4	-0.1204086	244.4	-0.1383044	244.4	-0.110168	244.4	-0.1197396	244.4	-0.1543056
244.6	1.100972	244.6	1.033387	244.6	1.080646	244.6	1.052573	244.6	1.06696	244.6	1.04656	244.6	1.051361	244.6	-0.1893744	244.6	-0.1226591	244.6	-0.1771067	244.6	-0.1482433	244.6	-0.1184969	244.6	-0.138771	244.6	-0.1092137	244.6	-0.1172841	244.6	-0.1543498
244.81	1.100652	244.81	1.037631	244.81	1.085679	244.81	1.051753	244.81	1.063981	244.81	1.041418	244.81	1.045442	244.81	-0.191515	244.8	-0.1180309	244.8	-0.1742809	244.8	-0.1489259	244.8	-0.1174012	244.8	-0.141517	244.8	-0.1109226	244.8	-0.1176561	244.8	-0.1508767
245	1.101782	245	1.037115	245	1.081306	245	1.050408	245	1.067515	245	1.047473	245	1.050461	245	-0.1936065	245	-0.1199692	245	-0.1796876	245	-0.1486562	245	-0.1231337	245	-0.1398163	245	-0.107063	245	-0.1189713	245	-0.1487505
245.2	1.110455	245.2	1.041868	245.2	1.076925	245.2	1.056362	245.2	1.066811	245.2	1.046382	245.2	1.048078	245.2	-0.185762	245.2	-0.1200835	245.2	-0.1790818	245.2	-0.145122	245.2	-0.1164196	245.2	-0.1435546	245.2	-0.1048695	245.2	-0.1191135	245.2	-0.1508199
245.4	1.11142	245.4	1.038478	245.4	1.082978	245.4	1.055759	245.4	1.063132	245.4	1.046602	245.4	1.048249	245.4	-0.1895896	245.4	-0.1247682	245.4	-0.1757517	245.4	-0.1506448	245.4	-0.1186526	245.4	-0.1428408	245.4	-0.1073195	245.4	-0.1204142	245.4	-0.144845
245.6	1.102471	245.6	1.043797	245.6	1.083279	245.6	1.052508	245.6	1.067556	245.6	1.043806	245.6	1.047184	245.6	-0.1934225	245.6	-0.1166788	245.6	-0.1750697	245.6	-0.1431507	245.6	-0.1215133	245.6	-0.1423146	245.6	-0.1079298	245.6	-0.1182495	245.6	-0.1491787
245.8	1.106722	245.8	1.038268	245.8	1.083566	245.8	1.056117	245.8	1.068039	245.8	1.045934	245.8	1.05288	245.8	-0.1878038	245.8	-0.1187897	245.8	-0.1776117	245.8	-0.1450527	245.8	-0.119579	245.8	-0.140436	245.8	-0.1051436	245.8	-0.117647	245.8	-0.1526093
246	1.09984	246	1.039089	246	1.082385	246	1.057842	246	1.068988	246	1.045458	246	1.05192	246	-0.190967	245.99	-0.1185059	245.99	-0.1763179	245.99	-0.1474462	245.99	-0.1206854	245.99	-0.1431101	245.99	-0.1009859	245.99	-0.1137382	245.99	-0.1501103
246.2	1.106363	246.2	1.036885	246.2	1.079211	246.2	1.054546	246.2	1.06398	246.2	1.043126	246.2	1.051011	246.2	-0.1877882	246.19	-0.121212	246.19	-0.1748223	246.19	-0.1517069	246.19	-0.1162158	246.19	-0.1410597	246.19	-0.1048161	246.19	-0.1160473	246.19	-0.1440064
246.4	1.106338	246.4	1.038143	246.4	1.084028	246.4	1.051103	246.4	1.065109	246.4	1.043744	246.4	1.05116	246.4	-0.1869149	246.4	-0.1196547	246.4	-0.1725053	246.4	-0.1477296	246.4	-0.1176922	246.4	-0.1361977	246.4	-0.1091413	246.4	-0.1192185	246.4	-0.1449014
246.6	1.106087	246.6	1.041174	246.6	1.080166	246.6	1.052347	246.6	1.067291	246.6	1.043055	246.6	1.050628	246.6	-0.1877	246.6	-0.1164135	246.6	-0.1804622	246.6	-0.1488674	246.6	-0.1189077	246.6	-0.1430223	246.6	-0.1040486	246.6	-0.1184874	246.6	-0.1473728
246.8	1.101625	246.8	1.039796	246.8	1.081538	246.8	1.052932	246.8	1.065742	246.8	1.042813	246.8	1.051284	246.8	-0.1920624	246.79	-0.1147811	246.79	-0.1768222	246.79	-0.1518742	246.79	-0.1143806	246.79	-0.1404096	246.79	-0.1032344	246.79	-0.1160736	246.79	-0.1501297
247	1.106345	247	1.039933	247	1.080402	247	1.053641	247	1.064219	247	1.046218	247	1.046578	247	-0.1911413	247	-0.1163637	247	-0.1802867	247	-0.1463968	247	-0.1148777	247	-0.1404003	247	-0.1057669	247	-0.1180358	247	-0.149099
247.2	1.107853	247.2	1.037187	247.2	1.078239	247.2	1.055686	247.2	1.071624	247.2	1.04115	247.2	1.051042	247.2	-0.1867452	247.19	-0.1143149	247.19	-0.1772904	247.19	-0.1457375	247.19	-0.1186628	247.19	-0.1371255	247.19	-0.1070422	247.19	-0.1217886	247.19	-0.150117
247.4	1.101448	247.4	1.037516	247.4	1.078944	247.4	1.055538	247.4	1.068443	247.4	1.048312	247.4	1.054106	247.4	-0.1906578	247.4	-0.1211473	247.4	-0.1761402	247.4	-0.1447215	247.4	-0.1225261	247.4	-0.1376658	247.4	-0.1076988	247.4	-0.1168016	247.4	-0.1476472
247.6	1.111258	247.6	1.040871	247.6	1.083409	247.6	1.055554	247.6	1.068471	247.6	1.048419	247.6	1.053113	247.6	-0.1838403	247.59	-0.1189386	247.59	-0.1785352	247.59	-0.1471342	247.59	-0.1174295	247.59	-0.1388916	247.59	-0.1076372	247.59	-0.1180149	247.59	-0.1483002
247.8	1.1079	247.8	1.043607	247.8	1.0824	247.8	1.053572	247.8	1.068097	247.8	1.047946	247.8	1.05278	247.8	-0.1912941	247.79	-0.1178809	247.79	-0.1738244	247.79	-0.1449917	247.79	-0.1168559	247.79	-0.1413942	247.79	-0.1081057	247.79	-0.1155645	247.79	-0.1458786
248	1.106031	248	1.039918	248	1.080301	248	1.048812	248	1.065511	248	1.047036	248	1.049916	248	-0.1885933	247.99	-0.1170785	247.99	-0.178941	247.99	-0.1472535	247.99	-0.1172763	247.99	-0.1396914	247.99	-0.1088846	247.99	-0.1178279	247.99	-0.1458852
248.2	1.108973	248.2	1.041278	248.2	1.080548	248.2	1.053335	248.2	1.070527	248.2	1.048059	248.2	1.049387	248.2	-0.1844711	248.19	-0.1162775	248.19	-0.1737206	248.19	-0.1422851	248.19	-0.1152477	248.19	-0.13938	248.19	-0.1040753	248.19	-0.1158618	248.19	-0.1447401
248.4	1.108109	248.4	1.043066	248.4	1.080996	248.4	1.056449	248.4	1.070751	248.4	1.047801	248.4	1.051086	248.4	-0.1881116	248.4	-0.115937	248.4	-0.1787221	248.4	-0.1457485	248.4	-0.1172316	248.4	-0.1430696	248.4	-0.1048515	248.4	-0.116486	248.4	-0.1440659
248.6	1.109537	248.6	1.041227	248.6	1.083141	248.6	1.052682	248.6	1.067753	248.6	1.045405	248.6	1.047443	248.6	-0.1872248	248.6	-0.1179559	248.6	-0.1708726	248.6	-0.1438623	248.6	-0.1165597	248.6	-0.1371216	248.6	-0.1037193	248.6	-0.1177512	248.6	-0.147507
248.8	1.10905	248.8	1.042721	248.8	1.086386	248.8	1.056357	248.8	1.067175	248.8	1.049695	248.8	1.051164	248.8	-0.1869922	248.79	-0.1170832	248.79	-0.1750697	248.79	-0.150334	248.79	-0.1164505	248.79	-0.1365251	248.79	-0.1099462	248.79	-0.1135873	248.79	-0.143203
249	1.112644	249	1.043536	249	1.079651	249	1.057099	249	1.073078	249	1.045257	249	1.047696	249	-0.1903318	248.99	-0.1165383	248.99	-0.1752027	248.99	-0.1416044	248.99	-0.1200929	248.99	-0.1420272	248.99	-0.1086629	248.99	-0.1190082	248.99	-0.147076
249.2	1.10764	249.2	1.044568	249.2	1.081263	249.2	1.059369	249.2	1.070832	249.2	1.045817	249.2	1.050033	249.2	-0.1910446	249.2	-0.1166346	249.2	-0.1775017	249.2	-0.143429	249.2	-0.1129845	249.2	-0.1400196	249.2	-0.1065291	249.2	-0.1154503	249.2	-0.1468219
249.4	1.111429	249.4	1.043372	249.4	1.083625	249.4	1.057091	249.4	1.06937	249.4	1.047785	249.4	1.056246	249.4	-0.1884251	249.39	-0.1181784	249.39	-0.1760519	249.39	-0.1463097	249.39	-0.1119432	249.39	-0.1383511	249.39	-0.1027513	249.39	-0.1120984	249.39	-0.1444858
249.6	1.113825	249.6	1.041302	249.6	1.08537	249.6	1.053931	249.6	1.071028	249.6	1.046646	249.6	1.051875	249.6	-0.1872117	249.6	-0.1190787	249.6	-0.1745631	249.6	-0.1470342	249.6	-0.1141678	249.6	-0.1360676	249.6	-0.1024704	249.6	-0.1206743	249.6	-0.1474002
249.8	1.107989	249.8	1.047836	249.8	1.08032	249.8	1.055217	249.8	1.072624	249.8	1.047879	249.8	1.053486	249.8	-0.1850605	249.79	-0.1130023	249.79	-0.1750991	249.79	-0.1434749	249.79	-0.1122305	249.79	-0.1373783	249.79	-0.1089898	249.79	-0.1159878	249.79	-0.1465492
250	1.110212	250	1.038414	250	1.085397	250	1.054706	250	1.071041	250	1.048391	250	1.047616	250	-0.1879199	250	-0.1173559	250	-0.176012	250	-0.1453452	250	-0.119304	250	-0.1373074	250	-0.1048852	250	-0.1155016	250	-0.1409321
250.2	1.105911	250.2	1.040859	250.2	1.083401	250.2	1.056397	250.2	1.070788	250.2	1.049299	250.2	1.055425	250.2	-0.1849686	250.19	-0.1171125	250.19	-0.1752018	250.19	-0.1483072	250.19	-0.1170858	250.19	-0.1400185	250.19	-0.1019318	250.19	-0.1146161	250.19	-0.149066
250.4	1.11205	250.4	1.049694	250.4	1.084099	250.4	1.055306	250.4	1.071352	250.4	1.047832	250.4	1.053766	250.4	-0.1876991	250.4	-0.1155615	250.4	-0.171812	250.4	-0.1456322	250.4	-0.1157643	250.4	-0.134891	250.4	-0.1090684	250.4	-0.1138175	250.4	-0.1468716
250.6	1.109795	250.6	1.043881	250.6	1.08279	250.6	1.057567	250.6	1.069221	250.6	1.048977	250.6	1.056047	250.6	-0.1890136	250.6	-0.1128914	250.6	-0.1708383	250.6	-0.1432583	250.6	-0.1156196	250.6	-0.1377966	250.6	-0.1063296	250.6	-0.1104093	250.6	-0.146663
250.8	1.113992	250.8	1.04768	250.8	1.086649	250.8	1.058953	250.8	1.072279	250.8	1.049508	250.8	1.051535	250.8	-0.1866239	250.79	-0.117347	250.79	-0.1759354	250.79	-0.1449927	250.79	-0.1151715	250.79	-0.1381172	250.79	-0.1005675	250.79	-0.114473	250.79	-0.1501416
251	1.110689	251	1.045718	251	1.087205	251	1.057176	251	1.068333	251	1.051604	251	1.058511	251	-0.1877597	251	-0.1170049	251	-0.1727145	251	-0.1418077	251	-0.1144863	251	-0.1384236	251	-0.1033974	251	-0.1175592	251	-0.1420405
251.2	1.116143	251.2	1.045503	251.2	1.085148	251.2	1.05585	251.2	1.070931	251.2	1.042364	251.2	1.052507	251.2	-0.189141	251.19	-0.1167173	251.19	-0.1737605	251.19	-0.1438161	251.19	-0.112919	251.19	-0.1378213	251.19	-0.1014193	251.19	-0.1173694	251.19	-0.1501474
251.4	1.113189	251.4	1.047356	251.4	1.089682	251.4	1.062734	251.4	1.0684	251.4	1.044405	251.4	1.052541	251.4	-0.1830735	251.4	-0.1149861	251.4	-0.1817915	251.4	-0.144989	251.4	-0.1148426	251.4	-0.1367283	251.4	-0.1062267	251.4	-0.1168186	251.4	-0.1436798
251.6	1.112754	251.6	1.043625	251.6	1.091028	251.6	1.055838	251.6	1.070156	251.6	1.051631	251.6	1.056253	251.6	-0.1838887	251.6	-0.1105163	251.6	-0.1727112	251.6	-0.1450252	251.6	-0.1165462	251.6	-0.1378889	251.6	-0.1073209	251.6	-0.1104021	251.6	-0.145744
251.8	1.119136	251.8	1.045552	251.8	1.082076	251.8	1.058038	251.8	1.070504	251.8	1.044974	251.8	1.055707	251.8	-0.1889903	251.8	-0.1191274	251.8	-0.1700038	251.8	-0.1399007	251.8	-0.1116038	251.8	-0.1366013	251.8	-0.1048557	251.8	-0.1159798	251.8	-0.1447655
252	1.112172	252	1.043234	252	1.092408	252	1.063047	252	1.070973	252	1.048989	252	1.055161	252	-0.1830911	251.99	-0.1177427	251.99	-0.1686932	251.99	-0.1422895	251.99	-0.1164592	251.99	-0.1351582	251.99	-0.103943	251.99	-0.1120644	251.99	-0.1493074
252.2	1.114114	252.2	1.048451	252.2	1.090334	252.2	1.058574	252.2	1.069101	252.2	1.048539	252.2	1.053576	252.2	-0.1837975	252.19	-0.1181894	252.19	-0.1697332	252.19	-0.1419822	252.19	-0.1183136	252.19	-0.1395448	252.19	-0.1058779	252.19	-0.1145286	252.19	-0.1478052
252.4	1.11592	252.4	1.049801	252.4	1.087212	252.4	1.058035	252.4	1.072904	252.4	1.05199	252.4	1.05407	252.4	-0.1885317	252.4	-0.112991	252.4	-0.1721434	252.4	-0.1426467	252.4	-0.1148448	252.4	-0.1360042	252.4	-0.1057117	252.4	-0.1155673	252.4	-0.1444379
252.6	1.11396	252.6	1.043406	252.6	1.088104	252.6	1.059716	252.6	1.072401	252.6	1.050079	252.6	1.055164	252.6	-0.1852341	252.59	-0.1155065	252.59	-0.1744069	252.59	-0.1428599	252.59	-0.120911	252.59	-0.1431081	252.59	-0.1016478	252.59	-0.1144991	252.59	-0.1449496
252.8	1.117748	252.8	1.043768	252.8	1.083665	252.8	1.063171	252.8	1.075267	252.8	1.050517	252.8	1.056752	252.8	-0.1828149	252.79	-0.1186115	252.79	-0.1680607	252.79	-0.1427215	252.79	-0.1168035	252.79	-0.1350238	252.79	-0.1056683	252.79	-0.1126315	252.79	-0.146978
253	1.117766	253	1.044495	253	1.089195	253	1.060847	253	1.074616	253	1.05313	253	1.050934	253	-0.1873631	252.99	-0.1195076	252.99	-0.1750212	252.99	-0.1418443	252.99	-0.1145911	252.99	-0.1394149	252.99	-0.104884	252.99	-0.1178308	252.99	-0.1455956
253.2	1.11428	253.2	1.047371	253.2	1.089026	253.2	1.060022	253.2	1.070131	253.2	1.053131	253.2	1.053912	253.2	-0.1847321	253.19	-0.1173012	253.19	-0.174223	253.19	-0.1410831	253.19	-0.1142421	253.19	-0.1344172	253.19	-0.1043563	253.19	-0.1163446	253.19	-0.1445112
253.4	1.114674	253.4	1.050924	253.4	1.083284	253.4	1.062775	253.4	1.074345	253.4	1.050766	253.4	1.051998	253.4	-0.1856628	253.39	-0.1149684	253.39	-0.1732398	253.39	-0.1419159	253.39	-0.1146626	253.39	-0.136013	253.39	-0.1007448	253.39	-0.1117141	253.39	-0.1431991
253.6	1.115497	253.6	1.051295	253.6	1.085711	253.6	1.054965	253.6	1.070763	253.6	1.051923	253.6	1.053333	253.6	-0.185384	253.59	-0.1109368	253.59	-0.174844	253.59	-0.1452911	253.59	-0.114572	253.59	-0.1371349	253.59	-0.09725033	253.59	-0.113082	253.59	-0.1458336
253.8	1.116921	253.8	1.045617	253.8	1.089473	253.8	1.058724	253.8	1.074117	253.8	1.05189	253.8	1.052241	253.8	-0.1865146	253.8	-0.1138419	253.8	-0.1733285	253.8	-0.141752	253.8	-0.1161388	253.8	-0.1403711	253.8	-0.1065638	253.8	-0.1120084	253.8	-0.1414144
254	1.118272	254	1.049594	254	1.086961	254	1.061679	254	1.071687	254	1.05746	254	1.053325	254	-0.187459	254	-0.1131728	254	-0.1727027	254	-0.1422284	254	-0.1143596	254	-0.1304719	254	-0.0989584	254	-0.1169302	254	-0.1476009
254.2	1.110143	254.2	1.04507	254.2	1.087383	254.2	1.063649	254.2	1.070017	254.2	1.049447	254.2	1.055528	254.2	-0.1846671	254.19	-0.1128754	254.19	-0.1729262	254.19	-0.1398617	254.19	-0.1137167	254.19	-0.1348976	254.19	-0.10292	254.19	-0.1110446	254.19	-0.1451529
254.4	1.120619	254.4	1.05308	254.4	1.091781	254.4	1.064338	254.4	1.073467	254.4	1.053349	254.4	1.051652	254.4	-0.1826636	254.39	-0.1170683	254.39	-0.1721104	254.39	-0.1443167	254.39	-0.1155866	254.39	-0.1369586	254.39	-0.1035203	254.39	-0.1153576	254.39	-0.1456752
254.6	1.116661	254.6	1.047804	254.6	1.087822	254.6	1.063882	254.6	1.074201	254.6	1.053904	254.6	1.055338	254.6	-0.182928	254.59	-0.1156237	254.59	-0.1747703	254.59	-0.1442732	254.59	-0.1174814	254.59	-0.1365384	254.59	-0.1057615	254.59	-0.1107864	254.59	-0.1412289
254.8	1.118363	254.8	1.045051	254.8	1.08588	254.8	1.059179	254.8	1.076732	254.8	1.045534	254.8	1.060863	254.8	-0.1807621	254.79	-0.1104606	254.79	-0.1731526	254.79	-0.1408614	254.79	-0.1121318	254.79	-0.1349681	254.79	-0.1047618	254.79	-0.1152529	254.79	-0.1441736
255	1.121382	255	1.051902	255	1.088172	255	1.062051	255	1.078709	255	1.05213	255	1.050668	255	-0.1840472	255	-0.1153889	255	-0.1692555	255	-0.1419929	255	-0.1149719	255	-0.1356043	255	-0.1033796	255	-0.1194989	255	-0.1453097
255.2	1.115077	255.2	1.051253	255.2	1.088295	255.2	1.059422	255.2	1.078227	255.2	1.047949	255.2	1.055996	255.2	-0.189276	255.2	-0.1154603	255.2	-0.1703916	255.2	-0.1424209	255.2	-0.1140718	255.2	-0.1358955	255.2	-0.1027792	255.2	-0.1106784	255.2	-0.1467831
255.4	1.117347	255.4	1.051205	255.4	1.090882	255.4	1.060513	255.4	1.072001	255.4	1.049585	255.4	1.05319	255.4	-0.1868219	255.39	-0.1137465	255.39	-0.1688775	255.39	-0.1433597	255.39	-0.1109369	255.39	-0.1345436	255.39	-0.1031282	255.39	-0.1191251	255.39	-0.1438673
255.6	1.112365	255.6	1.047756	255.6	1.086514	255.6	1.059292	255.6	1.073204	255.6	1.047952	255.6	1.058917	255.6	-0.1833919	255.59	-0.113702	255.59	-0.1682538	255.59	-0.1419605	255.59	-0.115349	255.59	-0.1335514	255.59	-0.09870762	255.59	-0.1127853	255.59	-0.1429995
255.8	1.122235	255.8	1.052544	255.8	1.086888	255.8	1.062524	255.8	1.07603	255.8	1.050179	255.8	1.054528	255.8	-0.1814585	255.8	-0.1139008	255.8	-0.174294	255.8	-0.1344954	255.8	-0.1122633	255.8	-0.1322924	255.8	-0.09972358	255.8	-0.1079402	255.8	-0.1430797
256	1.117271	256	1.052003	256	1.0912	256	1.062783	256	1.079107	256	1.052654	256	1.055564	256	-0.1849311	255.99	-0.1073625	255.99	-0.1720232	255.99	-0.1406989	255.99	-0.1123572	255.99	-0.1337385	255.99	-0.104921	255.99	-0.1175439	255.99	-0.1429055
256.2	1.120208	256.2	1.050106	256.2	1.090295	256.2	1.063326	256.2	1.071407	256.2	1.052575	256.2	1.05527	256.2	-0.1879953	256.2	-0.1113531	256.2	-0.1687667	256.2	-0.1403426	256.2	-0.1094282	256.2	-0.1367348	256.2	-0.1024366	256.2	-0.1136075	256.2	-0.1473399
256.4	1.123297	256.4	1.055321	256.4	1.090776	256.4	1.067353	256.4	1.074299	256.4	1.05486	256.4	1.05467	256.4	-0.1830009	256.39	-0.1123133	256.39	-0.1728525	256.39	-0.142857	256.39	-0.1150931	256.39	-0.135673	256.39	-0.1013073	256.39	-0.1077034	256.39	-0.1461882
256.6	1.1208	256.6	1.051166	256.6	1.092337	256.6	1.061632	256.6	1.0749	256.6	1.050396	256.6	1.0584	256.6	-0.1848198	256.6	-0.1096818	256.6	-0.1696799	256.6	-0.1408529	256.6	-0.108334	256.6	-0.1325249	256.6	-0.09974334	256.6	-0.1115686	256.6	-0.1446751
256.8	1.122568	256.8	1.05371	256.8	1.09119	256.8	1.064294	256.8	1.074952	256.8	1.052527	256.8	1.052506	256.8	-0.1812753	256.79	-0.1129158	256.79	-0.1697322	256.79	-0.1394133	256.79	-0.1138762	256.79	-0.1377696	256.79	-0.1066312	256.79	-0.1116731	256.79	-0.1429161
257	1.121746	257	1.0515	257	1.090088	257	1.06005	257	1.07458	257	1.051151	257	1.057428	257	-0.1803113	256.99	-0.1094456	256.99	-0.1701792	256.99	-0.1435402	256.99	-0.1154314	256.99	-0.1300609	256.99	-0.1019193	256.99	-0.1115881	256.99	-0.1480973
257.2	1.114688	257.2	1.050302	257.2	1.091034	257.2	1.06304	257.2	1.074738	257.2	1.04961	257.2	1.060115	257.2	-0.1838685	257.19	-0.1124148	257.19	-0.1717347	257.19	-0.1373594	257.19	-0.1125477	257.19	-0.1334884	257.19	-0.1026261	257.19	-0.1117145	257.19	-0.1434985
257.4	1.124548	257.4	1.058494	257.4	1.090366	257.4	1.064986	257.4	1.076322	257.4	1.053635	257.4	1.054557	257.4	-0.1835109	257.4	-0.1086819	257.4	-0.1679563	257.4	-0.1435097	257.4	-0.1124143	257.4	-0.1283631	257.4	-0.1010308	257.4	-0.109445	257.4	-0.143797
257.6	1.120057	257.6	1.050926	257.6	1.092119	257.6	1.060349	257.6	1.072961	257.6	1.049177	257.6	1.06493	257.6	-0.1819941	257.59	-0.1161954	257.59	-0.1675084	257.59	-0.143608	257.59	-0.11546	257.59	-0.1342383	257.59	-0.09910687	257.59	-0.1090435	257.59	-0.1434297
257.8	1.126429	257.8	1.055196	257.8	1.093421	257.8	1.06649	257.8	1.07471	257.8	1.05101	257.8	1.060431	257.8	-0.1828894	257.79	-0.1104637	257.79	-0.1696304	257.79	-0.1410249	257.79	-0.1130434	257.79	-0.13534	257.79	-0.1004102	257.79	-0.1138035	257.79	-0.14131
258	1.127645	258	1.055217	258	1.094758	258	1.060782	258	1.074483	258	1.05277	258	1.059206	258	-0.1872631	257.99	-0.1103635	257.99	-0.1665153	257.99	-0.1393961	257.99	-0.1132081	257.99	-0.1326409	257.99	-0.09543378	257.99	-0.112404	257.99	-0.1436198
258.2	1.123255	258.2	1.053227	258.2	1.090458	258.2	1.063145	258.2	1.076914	258.2	1.053333	258.2	1.060596	258.2	-0.1822694	258.19	-0.1101441	258.19	-0.1675182	258.19	-0.1423081	258.19	-0.1133973	258.19	-0.1322085	258.19	-0.1013302	258.19	-0.1099491	258.19	-0.1379012
258.4	1.122618	258.4	1.053193	258.4	1.093327	258.4	1.06248	258.4	1.075013	258.4	1.0503	258.4	1.059386	258.4	-0.178591	258.39	-0.1117223	258.39	-0.173065	258.39	-0.1390795	258.39	-0.1109931	258.39	-0.1343539	258.39	-0.1015961	258.39	-0.114664	258.39	-0.1455564
258.6	1.123048	258.6	1.05538	258.6	1.09287	258.6	1.066829	258.6	1.075302	258.6	1.051444	258.6	1.056811	258.6	-0.1813868	258.59	-0.1146555	258.59	-0.1663468	258.59	-0.1396985	258.59	-0.1141774	258.59	-0.1340529	258.59	-0.1005005	258.59	-0.110328	258.59	-0.138944
258.8	1.126383	258.8	1.056604	258.8	1.096313	258.8	1.064154	258.8	1.076614	258.8	1.053528	258.8	1.055611	258.8	-0.1865616	258.79	-0.1110152	258.79	-0.1658972	258.79	-0.1460439	258.79	-0.1058342	258.79	-0.133336	258.79	-0.1022341	258.79	-0.1101418	258.79	-0.1405355
259	1.121733	259	1.051043	259	1.094105	259	1.069584	259	1.078306	259	1.049264	259	1.059035	259	-0.1847701	258.99	-0.1099995	258.99	-0.1677977	258.99	-0.1390448	258.99	-0.1130595	258.99	-0.1298005	258.99	-0.09903651	258.99	-0.1139014	258.99	-0.1432896
259.2	1.128398	259.2	1.052392	259.2	1.093428	259.2	1.065835	259.2	1.076389	259.2	1.055256	259.2	1.055727	259.2	-0.1820768	259.19	-0.1103147	259.19	-0.166785	259.19	-0.1344489	259.19	-0.1143671	259.19	-0.1316258	259.19	-0.09964816	259.19	-0.1082103	259.19	-0.1374563
259.4	1.126031	259.4	1.055117	259.4	1.094862	259.4	1.059966	259.4	1.07952	259.4	1.05267	259.4	1.059515	259.4	-0.1821272	259.39	-0.111142	259.39	-0.169601	259.39	-0.1431897	259.39	-0.1134659	259.39	-0.1287886	259.39	-0.1003429	259.39	-0.1086279	259.39	-0.1430679
259.6	1.122641	259.6	1.049567	259.6	1.098178	259.6	1.066494	259.6	1.077433	259.6	1.052285	259.6	1.061425	259.6	-0.1788378	259.6	-0.1119331	259.6	-0.1687368	259.6	-0.1373911	259.6	-0.11001	259.6	-0.1337138	259.6	-0.0960796	259.6	-0.1133171	259.6	-0.1469658
259.8	1.125072	259.8	1.056685	259.8	1.092769	259.8	1.062073	259.8	1.083055	259.8	1.050883	259.8	1.054835	259.8	-0.1797874	259.8	-0.1108656	259.8	-0.1697652	259.8	-0.140557	259.8	-0.1110307	259.8	-0.1334148	259.8	-0.09911449	259.8	-0.1111639	259.8	-0.1418758
260	1.129031	260	1.056723	260	1.09322	260	1.066564	260	1.080165	260	1.054768	260	1.060352	260	-0.1844141	259.99	-0.1112338	259.99	-0.1688555	259.99	-0.1344514	259.99	-0.109151	259.99	-0.130651	259.99	-0.102156	259.99	-0.1076465	259.99	-0.1410685
260.2	1.124267	260.2	1.055304	260.2	1.094338	260.2	1.066305	260.2	1.077615	260.2	1.051785	260.2	1.057997	260.2	-0.1776492	260.19	-0.1131127	260.19	-0.1661676	260.19	-0.1384642	260.19	-0.1111311	260.19	-0.1351817	260.19	-0.1027915	260.19	-0.1090611	260.19	-0.1431317
260.4	1.124001	260.4	1.054257	260.4	1.094529	260.4	1.063953	260.4	1.079186	260.4	1.053775	260.4	1.057814	260.4	-0.1786283	260.4	-0.1075135	260.4	-0.1672834	260.4	-0.1350941	260.4	-0.1071191	260.4	-0.1309693	260.4	-0.1006249	260.4	-0.1107072	260.4	-0.1392106
260.6	1.128068	260.6	1.055696	260.6	1.091754	260.6	1.06536	260.6	1.081528	260.6	1.056358	260.6	1.063192	260.6	-0.1823411	260.6	-0.1094123	260.6	-0.1665735	260.6	-0.1402246	260.6	-0.1133883	260.6	-0.1223896	260.6	-0.09980095	260.6	-0.1127245	260.6	-0.1427906
260.8	1.12703	260.8	1.056281	260.8	1.097133	260.8	1.062502	260.8	1.081627	260.8	1.053082	260.8	1.064551	260.8	-0.1781942	260.8	-0.1101659	260.8	-0.167303	260.8	-0.134046	260.8	-0.1132428	260.8	-0.1260566	260.8	-0.1012354	260.8	-0.1119825	260.8	-0.1380986
261	1.128245	261	1.053847	261	1.094081	261	1.064559	261	1.076706	261	1.054322	261	1.063465	261	-0.1808073	261	-0.1106577	261	-0.1653942	261	-0.1423027	261	-0.1108003	261	-0.1344141	261	-0.09645104	261	-0.1085538	261	-0.1437557
261.2	1.124468	261.2	1.054262	261.2	1.096428	261.2	1.065043	261.2	1.079134	261.2	1.055128	261.2	1.06099	261.2	-0.1805089	261.19	-0.1126659	261.19	-0.1680291	261.19	-0.1383749	261.19	-0.1099955	261.19	-0.1307277	261.19	-0.09815877	261.19	-0.1098249	261.19	-0.1423305
261.4	1.128983	261.4	1.057651	261.4	1.095672	261.4	1.067675	261.4	1.07679	261.4	1.055691	261.4	1.061145	261.4	-0.1825385	261.4	-0.1114699	261.4	-0.1649239	261.4	-0.1383895	261.4	-0.1124347	261.4	-0.1359399	261.4	-0.1002646	261.4	-0.1089194	261.4	-0.1384775
261.6	1.12638	261.6	1.054072	261.6	1.099052	261.6	1.06737	261.6	1.074679	261.6	1.056297	261.6	1.064321	261.6	-0.1815218	261.6	-0.1076346	261.6	-0.1677261	261.6	-0.138985	261.6	-0.1052381	261.6	-0.1279979	261.6	-0.1007761	261.6	-0.1121678	261.6	-0.1382095
261.8	1.128874	261.8	1.053993	261.8	1.096474	261.8	1.068315	261.8	1.07539	261.8	1.055447	261.8	1.058126	261.8	-0.1811341	261.8	-0.1119943	261.8	-0.1718055	261.8	-0.1352195	261.8	-0.1105954	261.8	-0.1306257	261.8	-0.09932793	261.8	-0.1086287	261.8	-0.1367793
262	1.126168	262	1.057277	262	1.091302	262	1.065895	262	1.074872	262	1.056836	262	1.063107	262	-0.1774967	262	-0.1107193	262	-0.1670637	262	-0.1397021	262	-0.1061035	262	-0.126316	262	-0.09503627	262	-0.1087867	262	-0.144235
262.2	1.128695	262.2	1.057274	262.2	1.092551	262.2	1.068492	262.2	1.07988	262.2	1.054629	262.2	1.064281	262.2	-0.1763746	262.2	-0.1038804	262.2	-0.1677228	262.2	-0.137636	262.2	-0.1053325	262.2	-0.1357976	262.2	-0.09858835	262.2	-0.1040569	262.2	-0.1401658
262.4	1.128061	262.4	1.057523	262.4	1.100643	262.4	1.06331	262.4	1.077076	262.4	1.053108	262.4	1.064193	262.4	-0.1777912	262.4	-0.1110041	262.4	-0.1679272	262.4	-0.1429363	262.4	-0.1109318	262.4	-0.1279474	262.4	-0.09770717	262.4	-0.1081686	262.4	-0.1432155
262.6	1.128607	262.6	1.055341	262.6	1.100467	262.6	1.069069	262.6	1.079111	262.6	1.05265	262.6	1.058934	262.6	-0.177262	262.6	-0.1065923	262.6	-0.1648571	262.6	-0.1368543	262.6	-0.106817	262.6	-0.132917	262.6	-0.1003344	262.6	-0.1061806	262.6	-0.1436989
262.8	1.128685	262.8	1.058004	262.8	1.095565	262.8	1.065059	262.8	1.074231	262.8	1.055733	262.8	1.061846	262.8	-0.1828364	262.8	-0.1089861	262.8	-0.1704202	262.8	-0.1396074	262.8	-0.1105351	262.8	-0.1324715	262.8	-0.09978683	262.8	-0.1074036	262.8	-0.1424947
263	1.128298	263	1.059834	263	1.099288	263	1.06488	263	1.078785	263	1.054043	263	1.065	263	-0.1793738	263	-0.1094147	263	-0.1675644	263	-0.1328324	263	-0.1092459	263	-0.1311911	263	-0.09930248	263	-0.1095939	263	-0.1411083
263.2	1.133526	263.2	1.058764	263.2	1.0955	263.2	1.069555	263.2	1.083037	263.2	1.05162	263.2	1.059896	263.2	-0.1829993	263.2	-0.1125401	263.2	-0.1723884	263.2	-0.1353666	263.2	-0.1070115	263.2	-0.1314205	263.2	-0.0991394	263.2	-0.1115589	263.2	-0.143598
263.4	1.130121	263.4	1.060036	263.4	1.097467	263.4	1.065573	263.4	1.082305	263.4	1.05954	263.4	1.062264	263.4	-0.1763615	263.4	-0.1071086	263.4	-0.1694687	263.4	-0.1376922	263.4	-0.1070037	263.4	-0.1288713	263.4	-0.09940837	263.4	-0.1093082	263.4	-0.1410206
263.6	1.132262	263.6	1.059928	263.6	1.097738	263.6	1.065849	263.6	1.080216	263.6	1.05328	263.6	1.062871	263.6	-0.1761949	263.6	-0.1075099	263.6	-0.1677444	263.6	-0.1360822	263.6	-0.1103326	263.6	-0.1294149	263.6	-0.09955165	263.6	-0.1076072	263.6	-0.1403137
263.8	1.131317	263.8	1.061441	263.8	1.098577	263.8	1.06821	263.8	1.082552	263.8	1.059129	263.8	1.060401	263.8	-0.1799187	263.8	-0.104213	263.8	-0.1693687	263.8	-0.13748	263.8	-0.1078402	263.8	-0.1296609	263.8	-0.1012538	263.8	-0.1121475	263.8	-0.1398692
264	1.12732	264	1.060276	264	1.101442	264	1.070101	264	1.081158	264	1.052876	264	1.057798	264	-0.1796677	264	-0.1112501	264	-0.1663441	264	-0.1390739	264	-0.1090467	264	-0.1290468	264	-0.09823377	264	-0.1105746	264	-0.1381076
264.2	1.1273	264.2	1.058701	264.2	1.093443	264.2	1.070035	264.2	1.07895	264.2	1.05887	264.2	1.058984	264.2	-0.177732	264.2	-0.1104468	264.2	-0.1630453	264.2	-0.1374855	264.2	-0.1096211	264.2	-0.1340572	264.2	-0.1005416	264.2	-0.108533	264.2	-0.1447507
264.4	1.136165	264.4	1.056056	264.4	1.099532	264.4	1.06539	264.4	1.080215	264.4	1.0579	264.4	1.065982	264.4	-0.1782469	264.4	-0.109378	264.4	-0.1672069	264.4	-0.1381377	264.4	-0.1111873	264.4	-0.130528	264.4	-0.0984477	264.4	-0.1108106	264.4	-0.1370884
264.6	1.133181	264.6	1.064065	264.6	1.096732	264.6	1.069861	264.6	1.085122	264.6	1.058055	264.6	1.059439	264.6	-0.1764208	264.6	-0.1091083	264.6	-0.1694173	264.6	-0.1369404	264.6	-0.1072742	264.6	-0.1327696	264.6	-0.09634466	264.6	-0.1060618	264.6	-0.1368286
264.8	1.130682	264.8	1.05575	264.8	1.097747	264.8	1.066231	264.8	1.081398	264.8	1.060381	264.8	1.059751	264.8	-0.1738994	264.8	-0.1058243	264.8	-0.1680586	264.8	-0.1369117	264.8	-0.106398	264.8	-0.1267676	264.8	-0.09846812	264.8	-0.1099847	264.8	-0.1371167
265	1.130648	265	1.060378	265	1.10375	265	1.070327	265	1.078981	265	1.058102	265	1.065131	265	-0.1778566	265	-0.1093937	265	-0.1673307	265	-0.1295587	265	-0.1085967	265	-0.1306489	265	-0.09504179	265	-0.1113258	265	-0.1386816
265.2	1.137507	265.2	1.062281	265.2	1.098285	265.2	1.064214	265.2	1.082658	265.2	1.059238	265.2	1.063966	265.2	-0.1784465	265.2	-0.1095908	265.2	-0.1626374	265.2	-0.1372057	265.2	-0.1072197	265.2	-0.1258457	265.2	-0.0978113	265.2	-0.1116342	265.2	-0.1371149
265.4	1.130216	265.4	1.060019	265.4	1.102379	265.4	1.067653	265.4	1.079657	265.4	1.058217	265.4	1.061987	265.4	-0.1790937	265.4	-0.1051375	265.4	-0.1687746	265.4	-0.1383768	265.4	-0.1020329	265.4	-0.1254416	265.4	-0.09826831	265.4	-0.1050277	265.4	-0.1435145
265.6	1.137102	265.6	1.061199	265.6	1.099206	265.6	1.068808	265.6	1.083229	265.6	1.05735	265.6	1.065053	265.6	-0.1812625	265.6	-0.1085876	265.6	-0.1604518	265.6	-0.1369416	265.6	-0.1067827	265.6	-0.1264793	265.6	-0.09509716	265.6	-0.1101974	265.6	-0.1401297
265.8	1.135019	265.8	1.057269	265.8	1.101434	265.8	1.068549	265.8	1.088361	265.8	1.056359	265.8	1.062936	265.8	-0.1820059	265.8	-0.1069332	265.8	-0.166091	265.8	-0.1356764	265.8	-0.1078375	265.8	-0.1303778	265.8	-0.09614249	265.8	-0.1086257	265.8	-0.1368558
266	1.134762	266	1.059546	266	1.099976	266	1.070466	266	1.086542	266	1.05983	266	1.06313	266	-0.17916	266	-0.1075796	266	-0.1637073	266	-0.1360992	266	-0.106089	266	-0.1290306	266	-0.09797171	266	-0.1068644	266	-0.1379981
266.2	1.135458	266.2	1.066634	266.2	1.101215	266.2	1.071416	266.2	1.081547	266.2	1.054826	266.2	1.063128	266.2	-0.1786137	266.2	-0.1057367	266.2	-0.1680375	266.2	-0.1352789	266.2	-0.1079279	266.2	-0.1299022	266.2	-0.09275788	266.2	-0.1103058	266.2	-0.1389601
266.4	1.134527	266.4	1.063932	266.4	1.101204	266.4	1.06997	266.4	1.082027	266.4	1.062999	266.4	1.059776	266.4	-0.1815901	266.4	-0.1069208	266.4	-0.1671992	266.4	-0.133008	266.4	-0.1079687	266.4	-0.1303454	266.4	-0.09642866	266.4	-0.1026353	266.4	-0.1337741
266.6	1.13364	266.6	1.065453	266.6	1.100754	266.6	1.068855	266.6	1.084646	266.6	1.056194	266.6	1.065245	266.6	-0.1722022	266.6	-0.1028688	266.6	-0.1651537	266.6	-0.1355525	266.6	-0.1071559	266.6	-0.1264242	266.6	-0.09857061	266.6	-0.104844	266.6	-0.1337825
266.8	1.132985	266.8	1.063569	266.8	1.100485	266.8	1.069836	266.8	1.080092	266.8	1.058662	266.8	1.068984	266.8	-0.1764093	266.8	-0.1071797	266.8	-0.1631412	266.8	-0.1351679	266.8	-0.1092627	266.8	-0.1283551	266.8	-0.09697397	266.8	-0.1070283	266.8	-0.1361187
267	1.135774	267	1.060735	267	1.099585	267	1.069709	267	1.081912	267	1.058086	267	1.067638	267	-0.1797396	266.99	-0.1070349	266.99	-0.1618496	266.99	-0.1313571	266.99	-0.1069965	266.99	-0.13025	266.99	-0.09818738	266.99	-0.1081355	266.99	-0.1431049
267.2	1.130156	267.2	1.062199	267.2	1.105496	267.2	1.073617	267.2	1.082453	267.2	1.061288	267.2	1.067788	267.2	-0.1735128	267.19	-0.1122876	267.19	-0.1631612	267.19	-0.1346141	267.19	-0.1068883	267.19	-0.1271326	267.19	-0.09800247	267.19	-0.1071531	267.19	-0.1362711
267.4	1.134962	267.4	1.067355	267.4	1.100593	267.4	1.066703	267.4	1.08419	267.4	1.05861	267.4	1.05976	267.4	-0.1806924	267.39	-0.1098028	267.39	-0.1604937	267.39	-0.1325938	267.39	-0.1047832	267.39	-0.1296063	267.39	-0.1003564	267.39	-0.1097981	267.39	-0.1383722
267.6	1.135608	267.6	1.062955	267.6	1.101957	267.6	1.070551	267.6	1.080577	267.6	1.059313	267.6	1.067918	267.6	-0.1732883	267.6	-0.1059811	267.6	-0.1655926	267.6	-0.1375425	267.6	-0.1050365	267.6	-0.1307536	267.6	-0.09518506	267.6	-0.1066707	267.6	-0.1360742
267.8	1.133829	267.8	1.064868	267.8	1.100153	267.8	1.073387	267.8	1.086976	267.8	1.062936	267.8	1.064787	267.8	-0.176803	267.8	-0.1024761	267.8	-0.1668205	267.8	-0.1356606	267.8	-0.1073036	267.8	-0.1319292	267.8	-0.09819626	267.8	-0.1068161	267.8	-0.1429495
268	1.135334	268	1.06444	268	1.103734	268	1.070086	268	1.081155	268	1.059235	268	1.061858	268	-0.1747511	268	-0.1069009	268	-0.164278	268	-0.1334541	268	-0.1033799	268	-0.12936	268	-0.09431081	268	-0.1054174	268	-0.1364441
268.2	1.136236	268.2	1.063032	268.2	1.100715	268.2	1.071597	268.2	1.082652	268.2	1.064252	268.2	1.06536	268.2	-0.174628	268.2	-0.1069346	268.2	-0.1665042	268.2	-0.133082	268.2	-0.1003806	268.2	-0.1252077	268.2	-0.09400506	268.2	-0.1056306	268.2	-0.1374857
268.4	1.132548	268.4	1.061743	268.4	1.104368	268.4	1.073838	268.4	1.079039	268.4	1.061062	268.4	1.064921	268.4	-0.1771504	268.4	-0.1095522	268.4	-0.1698095	268.4	-0.1360692	268.4	-0.1061988	268.4	-0.1259	268.4	-0.09363716	268.4	-0.1066864	268.4	-0.1381719
268.61	1.139824	268.61	1.061427	268.61	1.103751	268.61	1.074082	268.61	1.080634	268.61	1.06091	268.61	1.064434	268.61	-0.1779552	268.6	-0.1047916	268.6	-0.1676254	268.6	-0.1369899	268.6	-0.1056391	268.6	-0.1288558	268.6	-0.09768638	268.6	-0.106249	268.6	-0.1370603
268.8	1.136482	268.8	1.065317	268.8	1.106127	268.8	1.07131	268.8	1.082702	268.8	1.058271	268.8	1.066611	268.8	-0.1791416	268.79	-0.1029208	268.79	-0.163443	268.79	-0.1326952	268.79	-0.1071512	268.79	-0.1299032	268.79	-0.09588292	268.79	-0.1052632	268.79	-0.1345731
269	1.136629	269	1.069277	269	1.104187	269	1.071192	269	1.083016	269	1.060292	269	1.05949	269	-0.1749612	269	-0.1048514	269	-0.1654375	269	-0.1360755	269	-0.1060601	269	-0.1240749	269	-0.09485373	269	-0.1037711	269	-0.1334686
269.2	1.138455	269.2	1.069115	269.2	1.104369	269.2	1.074507	269.2	1.085455	269.2	1.061102	269.2	1.069328	269.2	-0.1753583	269.2	-0.1010481	269.2	-0.1607147	269.2	-0.1328266	269.2	-0.1056978	269.2	-0.1286357	269.2	-0.09274041	269.2	-0.1076138	269.2	-0.1360231
269.4	1.145058	269.4	1.065243	269.4	1.101903	269.4	1.071164	269.4	1.08646	269.4	1.060001	269.4	1.064929	269.4	-0.1741875	269.39	-0.1078526	269.39	-0.1630974	269.39	-0.1318224	269.39	-0.1084982	269.39	-0.1298421	269.39	-0.0968229	269.39	-0.1041127	269.39	-0.1377382
269.6	1.144208	269.6	1.065783	269.6	1.105536	269.6	1.070547	269.6	1.089472	269.6	1.059367	269.6	1.060139	269.6	-0.1754123	269.6	-0.1037104	269.6	-0.1629138	269.6	-0.1342741	269.6	-0.09977763	269.6	-0.1246853	269.6	-0.09376949	269.6	-0.103257	269.6	-0.1397923
269.8	1.136585	269.8	1.062462	269.8	1.10137	269.8	1.072883	269.8	1.080108	269.8	1.060995	269.8	1.068125	269.8	-0.1731005	269.8	-0.1021644	269.8	-0.1677123	269.8	-0.1348242	269.8	-0.1066138	269.8	-0.1274747	269.8	-0.09152486	269.8	-0.1085955	269.8	-0.1352321
270	1.134451	270	1.067385	270	1.108268	270	1.075924	270	1.084837	270	1.060645	270	1.067517	270	-0.1780759	270	-0.1035477	270	-0.1601119	270	-0.1362605	270	-0.1077055	270	-0.1306465	270	-0.09369817	270	-0.1083712	270	-0.133195
270.2	1.137984	270.2	1.068851	270.2	1.101156	270.2	1.074268	270.2	1.082099	270.2	1.060294	270.2	1.065805	270.2	-0.173856	270.19	-0.1074663	270.19	-0.1642002	270.19	-0.1310378	270.19	-0.1077946	270.19	-0.130238	270.19	-0.0917304	270.19	-0.1052593	270.19	-0.1348984
270.4	1.140774	270.4	1.06489	270.4	1.102343	270.4	1.077598	270.4	1.08645	270.4	1.06214	270.4	1.062681	270.4	-0.1755244	270.4	-0.1069132	270.4	-0.1593604	270.4	-0.1339391	270.4	-0.0999142	270.4	-0.127584	270.4	-0.09578375	270.4	-0.103422	270.4	-0.1407244
270.6	1.133754	270.6	1.065048	270.6	1.107152	270.6	1.073443	270.6	1.085698	270.6	1.060473	270.6	1.070427	270.6	-0.1754057	270.6	-0.108317	270.6	-0.1650558	270.6	-0.132192	270.6	-0.102815	270.6	-0.1267743	270.6	-0.09404654	270.6	-0.1050423	270.6	-0.1317327
270.8	1.14051	270.8	1.066578	270.8	1.104224	270.8	1.070912	270.8	1.088722	270.8	1.061856	270.8	1.066209	270.8	-0.1778011	270.8	-0.1026968	270.8	-0.1630159	270.8	-0.1300283	270.8	-0.1008352	270.8	-0.1230786	270.8	-0.0956257	270.8	-0.1083645	270.8	-0.1387933
271	1.135045	271	1.067054	271	1.107	271	1.073255	271	1.087002	271	1.056637	271	1.065008	271	-0.1751239	270.99	-0.1053652	270.99	-0.1650616	270.99	-0.1302006	270.99	-0.1032298	270.99	-0.1262014	270.99	-0.09302333	270.99	-0.1035305	270.99	-0.1376467
271.2	1.144443	271.2	1.061211	271.2	1.105502	271.2	1.072261	271.2	1.088824	271.2	1.058176	271.2	1.068244	271.2	-0.1746909	271.2	-0.1035666	271.2	-0.1655561	271.2	-0.1297101	271.2	-0.1055049	271.2	-0.1288803	271.2	-0.0978645	271.2	-0.101205	271.2	-0.1382842
271.4	1.140856	271.4	1.070859	271.4	1.106509	271.4	1.069085	271.4	1.089167	271.4	1.061254	271.4	1.064034	271.4	-0.1736675	271.4	-0.1046745	271.4	-0.1574225	271.4	-0.1362061	271.4	-0.1023007	271.4	-0.1308374	271.4	-0.09707858	271.4	-0.1040085	271.4	-0.1408292
271.6	1.13883	271.6	1.071137	271.6	1.104154	271.6	1.07473	271.6	1.084533	271.6	1.058278	271.6	1.069693	271.6	-0.1785832	271.59	-0.1067333	271.59	-0.1630112	271.59	-0.1329725	271.59	-0.1061504	271.59	-0.1273625	271.59	-0.09579706	271.59	-0.1011763	271.59	-0.1388052
271.8	1.13845	271.8	1.067286	271.8	1.107685	271.8	1.071689	271.8	1.089636	271.8	1.057584	271.8	1.068189	271.8	-0.1744594	271.8	-0.1047151	271.8	-0.1631952	271.8	-0.1327931	271.8	-0.104104	271.8	-0.1310763	271.8	-0.0933568	271.8	-0.1081832	271.8	-0.1338469
272	1.144553	272	1.069359	272	1.104679	272	1.071664	272	1.085745	272	1.062605	272	1.06493	272	-0.1759538	271.99	-0.1076266	271.99	-0.1603575	271.99	-0.1332479	271.99	-0.1035289	271.99	-0.1249038	271.99	-0.09477477	271.99	-0.1024103	271.99	-0.1348066
272.2	1.140882	272.2	1.068098	272.2	1.10882	272.2	1.070922	272.2	1.088786	272.2	1.065893	272.2	1.068148	272.2	-0.1760725	272.2	-0.1054282	272.2	-0.1629944	272.2	-0.129438	272.2	-0.09807428	272.2	-0.1307198	272.2	-0.09309391	272.2	-0.1045375	272.2	-0.1389589
272.4	1.136074	272.4	1.069209	272.4	1.106658	272.4	1.07216	272.4	1.089604	272.4	1.066012	272.4	1.069782	272.4	-0.1759373	272.39	-0.1036812	272.39	-0.1651386	272.39	-0.1308485	272.39	-0.1044519	272.39	-0.1281122	272.39	-0.09351015	272.39	-0.1043326	272.39	-0.1401955
272.6	1.141501	272.6	1.074437	272.6	1.109434	272.6	1.076857	272.6	1.08275	272.6	1.063849	272.6	1.06723	272.6	-0.177946	272.6	-0.1065594	272.6	-0.1604731	272.6	-0.1271685	272.6	-0.1035033	272.6	-0.125644	272.6	-0.0970515	272.6	-0.1017137	272.6	-0.1355699
272.8	1.142365	272.8	1.06983	272.8	1.109092	272.8	1.07101	272.8	1.082877	272.8	1.068159	272.8	1.06842	272.8	-0.177256	272.79	-0.1039276	272.79	-0.160798	272.79	-0.1295602	272.79	-0.1045363	272.79	-0.1265891	272.79	-0.09460714	272.79	-0.1060616	272.79	-0.1334879
273	1.142956	273	1.072003	273	1.106763	273	1.072383	273	1.082601	273	1.062554	273	1.072201	273	-0.1728288	273	-0.1029003	273	-0.15837	273	-0.1328149	273	-0.1032211	273	-0.1280141	273	-0.09441775	273	-0.1034169	273	-0.1351149
273.2	1.138618	273.2	1.068611	273.2	1.108646	273.2	1.077813	273.2	1.085686	273.2	1.059979	273.2	1.068582	273.2	-0.1734626	273.2	-0.1057492	273.2	-0.16033	273.2	-0.1317539	273.2	-0.1065572	273.2	-0.1291169	273.2	-0.09194554	273.2	-0.1050152	273.2	-0.1322678
273.4	1.14597	273.4	1.067228	273.4	1.103775	273.4	1.071399	273.4	1.085235	273.4	1.062072	273.4	1.064796	273.4	-0.1752048	273.39	-0.1004972	273.39	-0.161401	273.39	-0.1324818	273.39	-0.1023134	273.39	-0.1260442	273.39	-0.09241573	273.39	-0.1061169	273.39	-0.1333559
273.6	1.14362	273.6	1.069442	273.6	1.108434	273.6	1.074826	273.6	1.081748	273.6	1.067024	273.6	1.07051	273.6	-0.1729234	273.6	-0.1069815	273.6	-0.1613989	273.6	-0.1315078	273.6	-0.1063997	273.6	-0.1230464	273.6	-0.08930504	273.6	-0.1068439	273.6	-0.1324165
273.8	1.141392	273.8	1.068982	273.8	1.10863	273.8	1.079072	273.8	1.08351	273.8	1.059644	273.8	1.065351	273.8	-0.1701735	273.79	-0.1037173	273.79	-0.1628285	273.79	-0.13641	273.79	-0.1052094	273.79	-0.1219412	273.79	-0.09328064	273.79	-0.1055371	273.79	-0.1359926
274	1.143707	274	1.072423	274	1.108725	274	1.07626	274	1.084019	274	1.062978	274	1.067039	274	-0.1724095	274	-0.1068349	274	-0.1646079	274	-0.1301333	274	-0.1050655	274	-0.1235192	274	-0.09182553	274	-0.1011782	274	-0.1356845
274.2	1.143896	274.2	1.067211	274.2	1.112452	274.2	1.078115	274.2	1.081397	274.2	1.063648	274.2	1.063575	274.2	-0.1788775	274.19	-0.1041064	274.19	-0.1604877	274.19	-0.1337919	274.19	-0.1016255	274.19	-0.1233453	274.19	-0.09020293	274.19	-0.1053912	274.19	-0.1342004
274.4	1.140874	274.4	1.069461	274.4	1.110134	274.4	1.074772	274.4	1.086935	274.4	1.065103	274.4	1.071152	274.4	-0.1737942	274.39	-0.1022184	274.39	-0.1608666	274.39	-0.1258926	274.39	-0.1031759	274.39	-0.1258068	274.39	-0.09098713	274.39	-0.09682007	274.39	-0.135567
274.6	1.147774	274.6	1.069632	274.6	1.110034	274.6	1.075835	274.6	1.090047	274.6	1.062626	274.6	1.071198	274.6	-0.1741272	274.6	-0.1040332	274.6	-0.1629204	274.6	-0.1292634	274.6	-0.101835	274.6	-0.1232408	274.6	-0.09598633	274.6	-0.102052	274.6	-0.1376105
274.8	1.145246	274.8	1.069597	274.8	1.104823	274.8	1.071314	274.8	1.092461	274.8	1.063838	274.8	1.07083	274.8	-0.1726738	274.8	-0.102243	274.8	-0.1587454	274.8	-0.1277256	274.8	-0.09959277	274.8	-0.1219299	274.8	-0.09532153	274.8	-0.1048921	274.8	-0.136561
275	1.144249	275	1.072652	275	1.108234	275	1.075853	275	1.087979	275	1.064693	275	1.067293	275	-0.1708134	274.99	-0.1031331	274.99	-0.1630982	274.99	-0.1340982	274.99	-0.1023826	274.99	-0.1203266	274.99	-0.09539264	274.99	-0.1065712	274.99	-0.1343804
275.2	1.145946	275.2	1.073062	275.2	1.10278	275.2	1.077099	275.2	1.09143	275.2	1.062864	275.2	1.063435	275.2	-0.1727952	275.2	-0.1082948	275.2	-0.1615604	275.2	-0.1301943	275.2	-0.1020686	275.2	-0.1229727	275.2	-0.09370136	275.2	-0.1017206	275.2	-0.1365165
275.4	1.148708	275.4	1.071455	275.4	1.106664	275.4	1.076027	275.4	1.089876	275.4	1.06416	275.4	1.068347	275.4	-0.1753255	275.4	-0.1020938	275.4	-0.1619845	275.4	-0.1308074	275.4	-0.1022047	275.4	-0.1229321	275.4	-0.09108958	275.4	-0.1043732	275.4	-0.1352741
275.6	1.144661	275.6	1.071304	275.6	1.10792	275.6	1.07741	275.6	1.091795	275.6	1.065245	275.6	1.071246	275.6	-0.1686756	275.6	-0.1015997	275.6	-0.1564697	275.6	-0.1280811	275.6	-0.1011045	275.6	-0.1251323	275.6	-0.09164822	275.6	-0.1033286	275.6	-0.1325213
275.8	1.146012	275.8	1.070497	275.8	1.111744	275.8	1.076896	275.8	1.088338	275.8	1.059189	275.8	1.069469	275.8	-0.1742319	275.8	-0.1080284	275.8	-0.1588641	275.8	-0.1327967	275.8	-0.102536	275.8	-0.1233069	275.8	-0.09086788	275.8	-0.1032096	275.8	-0.1317077
276	1.144876	276	1.077434	276	1.108665	276	1.080148	276	1.091199	276	1.067997	276	1.070411	276	-0.1653729	275.99	-0.1003508	275.99	-0.1556161	275.99	-0.1279342	275.99	-0.09920832	275.99	-0.1220132	275.99	-0.08877909	275.99	-0.1023114	275.99	-0.1316969
276.2	1.144267	276.2	1.07188	276.2	1.106591	276.2	1.07685	276.2	1.09078	276.2	1.065798	276.2	1.065625	276.2	-0.1676993	276.19	-0.1019887	276.19	-0.1642258	276.19	-0.1293502	276.19	-0.1025362	276.19	-0.1276715	276.19	-0.09059408	276.19	-0.1006864	276.19	-0.1290621
276.4	1.146162	276.4	1.065018	276.4	1.109247	276.4	1.077556	276.4	1.090137	276.4	1.065597	276.4	1.069343	276.4	-0.1713269	276.39	-0.1014962	276.39	-0.1560599	276.39	-0.1324563	276.39	-0.1009292	276.39	-0.1258719	276.39	-0.09473732	276.39	-0.0969831	276.39	-0.1356517
276.6	1.146539	276.6	1.076458	276.6	1.109783	276.6	1.081068	276.6	1.087391	276.6	1.06398	276.6	1.066315	276.6	-0.1725247	276.6	-0.09821513	276.6	-0.1610069	276.6	-0.1278074	276.6	-0.1015263	276.6	-0.1234219	276.6	-0.09238455	276.6	-0.1038697	276.6	-0.1354406
276.8	1.14658	276.8	1.065226	276.8	1.111625	276.8	1.076229	276.8	1.087809	276.8	1.067524	276.8	1.06836	276.8	-0.1717063	276.79	-0.10337	276.79	-0.1595051	276.79	-0.131257	276.79	-0.09956565	276.79	-0.1243913	276.79	-0.09478823	276.79	-0.1042948	276.79	-0.1337131
277	1.145125	277	1.074831	277	1.110919	277	1.075421	277	1.086699	277	1.063374	277	1.070551	277	-0.1703579	277	-0.1022417	277	-0.1566504	277	-0.1305881	277	-0.1034727	277	-0.1209222	277	-0.0888231	277	-0.1030064	277	-0.1344268
277.2	1.148631	277.2	1.074852	277.2	1.115344	277.2	1.076914	277.2	1.094829	277.2	1.067116	277.2	1.067506	277.2	-0.1699608	277.19	-0.1008668	277.19	-0.1617418	277.19	-0.1281671	277.19	-0.1002335	277.19	-0.1271204	277.19	-0.08816604	277.19	-0.09844614	277.19	-0.1342667
277.4	1.154028	277.4	1.075977	277.4	1.114608	277.4	1.077093	277.4	1.088312	277.4	1.062942	277.4	1.07531	277.4	-0.1707517	277.4	-0.1021876	277.4	-0.1591568	277.4	-0.1333538	277.4	-0.09995373	277.4	-0.1277555	277.4	-0.09402309	277.4	-0.1008686	277.4	-0.136543
277.6	1.148306	277.6	1.076682	277.6	1.107663	277.6	1.078657	277.6	1.085497	277.6	1.062662	277.6	1.071849	277.6	-0.1731267	277.59	-0.1033349	277.59	-0.1582561	277.59	-0.1274232	277.59	-0.102219	277.59	-0.1248029	277.59	-0.08951398	277.59	-0.1059635	277.59	-0.1285228
277.8	1.151045	277.8	1.069366	277.8	1.109475	277.8	1.076018	277.8	1.095062	277.8	1.064596	277.8	1.068702	277.8	-0.1690032	277.79	-0.1034205	277.79	-0.1571772	277.79	-0.1287836	277.79	-0.09940966	277.79	-0.1244305	277.79	-0.09590738	277.79	-0.1053624	277.79	-0.1346966
278	1.147575	278	1.074582	278	1.107214	278	1.079992	278	1.086856	278	1.066175	278	1.072256	278	-0.1705872	277.99	-0.1030726	277.99	-0.1576775	277.99	-0.1297005	277.99	-0.1010255	277.99	-0.1175231	277.99	-0.08980455	277.99	-0.09912132	277.99	-0.1341801
278.2	1.152261	278.2	1.073846	278.2	1.11365	278.2	1.081816	278.2	1.09152	278.2	1.066679	278.2	1.07059	278.2	-0.1701337	278.19	-0.09888524	278.19	-0.1595513	278.19	-0.1297518	278.19	-0.09722271	278.19	-0.1242427	278.19	-0.09014957	278.19	-0.09871943	278.19	-0.133043
278.4	1.14722	278.4	1.075035	278.4	1.109155	278.4	1.077792	278.4	1.09093	278.4	1.067056	278.4	1.072037	278.4	-0.1666769	278.39	-0.1035079	278.39	-0.1572997	278.39	-0.1248592	278.39	-0.09950528	278.39	-0.1228488	278.39	-0.08763795	278.39	-0.09813659	278.39	-0.1322165
278.6	1.146114	278.6	1.075094	278.6	1.113509	278.6	1.07581	278.6	1.087242	278.6	1.065901	278.6	1.066439	278.6	-0.1703852	278.59	-0.1019913	278.59	-0.1572295	278.59	-0.1305676	278.59	-0.1004857	278.59	-0.124323	278.59	-0.09175935	278.59	-0.09994084	278.59	-0.1328775
278.8	1.148184	278.8	1.074361	278.8	1.114094	278.8	1.077814	278.8	1.093908	278.8	1.061846	278.8	1.070783	278.8	-0.1732204	278.79	-0.09737733	278.79	-0.1557995	278.79	-0.1255995	278.79	-0.104647	278.79	-0.1233091	278.79	-0.09091215	278.79	-0.1036813	278.79	-0.1332083
279	1.149646	279	1.080755	279	1.11692	279	1.07663	279	1.08793	279	1.066964	279	1.069086	279	-0.1719641	278.99	-0.1028494	278.99	-0.1542642	278.99	-0.1292383	278.99	-0.1012176	278.99	-0.1252307	278.99	-0.09045936	278.99	-0.1032346	278.99	-0.1338831
279.2	1.148457	279.2	1.072596	279.2	1.110262	279.2	1.079448	279.2	1.090249	279.2	1.068422	279.2	1.072678	279.2	-0.171667	279.19	-0.09929777	279.19	-0.1576802	279.19	-0.1249702	279.19	-0.1020422	279.19	-0.1223781	279.19	-0.09274159	279.19	-0.09775712	279.19	-0.1312288
279.4	1.152138	279.4	1.079484	279.4	1.113767	279.4	1.081214	279.4	1.091195	279.4	1.07029	279.4	1.070898	279.4	-0.1697506	279.39	-0.1021237	279.39	-0.1536248	279.39	-0.126562	279.39	-0.09854792	279.39	-0.1204891	279.39	-0.09149349	279.39	-0.1055158	279.39	-0.1303273
279.6	1.149659	279.6	1.073552	279.6	1.111539	279.6	1.079486	279.6	1.088968	279.6	1.070092	279.6	1.071248	279.6	-0.1721475	279.59	-0.0956314	279.59	-0.1535584	279.59	-0.1294877	279.59	-0.0982684	279.59	-0.1262839	279.59	-0.08704633	279.59	-0.1014233	279.59	-0.1327375
279.8	1.150197	279.8	1.081465	279.8	1.107492	279.8	1.077743	279.8	1.093864	279.8	1.060567	279.8	1.072198	279.8	-0.1666472	279.79	-0.1027011	279.79	-0.1558351	279.79	-0.1246082	279.79	-0.1014671	279.79	-0.1240734	279.79	-0.09023014	279.79	-0.1038084	279.79	-0.1306536
280	1.151169	280	1.074821	280	1.108066	280	1.078911	280	1.088912	280	1.065862	280	1.071463	280	-0.1688784	279.99	-0.09527925	279.99	-0.1604195	279.99	-0.1296164	279.99	-0.0988061	279.99	-0.123422	279.99	-0.09328385	279.99	-0.09785295	279.99	-0.1325668
280.2	1.154094	280.2	1.075709	280.2	1.110887	280.2	1.081617	280.2	1.091018	280.2	1.064917	280.2	1.069991	280.2	-0.1703711	280.19	-0.1017649	280.19	-0.1542531	280.19	-0.1295941	280.19	-0.09853032	280.19	-0.1252577	280.19	-0.08721869	280.19	-0.1015969	280.19	-0.1322146
280.4	1.152563	280.4	1.076819	280.4	1.11283	280.4	1.080033	280.4	1.090322	280.4	1.068315	280.4	1.069861	280.4	-0.1644544	280.43	-0.1023437	280.43	-0.1600091	280.43	-0.1278535	280.43	-0.09854097	280.43	-0.1241017	280.43	-0.09061667	280.43	-0.1008317	280.43	-0.1337223
280.6	1.152427	280.6	1.07355	280.6	1.110924	280.6	1.08216	280.6	1.088599	280.6	1.065899	280.6	1.06968	280.6	-0.1719515	280.59	-0.09740764	280.59	-0.1522853	280.59	-0.128275	280.59	-0.09659503	280.59	-0.1241528	280.59	-0.0872924	280.59	-0.09819329	280.59	-0.1295743
280.8	1.148388	280.8	1.076771	280.8	1.109053	280.8	1.0807	280.8	1.097006	280.8	1.065949	280.8	1.069953	280.8	-0.166391	280.79	-0.1043382	280.79	-0.1559144	280.79	-0.1264678	280.79	-0.1001073	280.79	-0.1198049	280.79	-0.09252821	280.79	-0.1022425	280.79	-0.1286479
281	1.152532	281	1.076776	281	1.111895	281	1.080793	281	1.089225	281	1.068252	281	1.068416	281	-0.1705926	280.99	-0.09744547	280.99	-0.1599866	280.99	-0.1287581	280.99	-0.1006958	280.99	-0.1183537	280.99	-0.08776041	280.99	-0.09823959	280.99	-0.133339
281.2	1.152787	281.2	1.074826	281.2	1.115499	281.2	1.081086	281.2	1.09348	281.2	1.064925	281.2	1.068071	281.2	-0.1721084	281.19	-0.09840257	281.19	-0.1583801	281.19	-0.1251639	281.19	-0.0993261	281.19	-0.1207878	281.19	-0.08815146	281.19	-0.1013188	281.19	-0.1303436
281.4	1.148044	281.4	1.079023	281.4	1.114754	281.4	1.08189	281.4	1.090265	281.4	1.066594	281.4	1.076377	281.4	-0.174499	281.39	-0.09804661	281.39	-0.1548757	281.39	-0.1285752	281.39	-0.09864961	281.39	-0.1246152	281.39	-0.08754569	281.39	-0.1004809	281.39	-0.1304566
281.6	1.155668	281.6	1.078659	281.6	1.116446	281.6	1.082444	281.6	1.092435	281.6	1.066258	281.6	1.07374	281.6	-0.1676732	281.59	-0.1004503	281.59	-0.1542948	281.59	-0.1251825	281.59	-0.1028962	281.59	-0.1224201	281.59	-0.08903255	281.59	-0.09979656	281.59	-0.1343296
281.8	1.153051	281.8	1.077869	281.8	1.118197	281.8	1.081364	281.8	1.089478	281.8	1.067604	281.8	1.075377	281.8	-0.1702379	281.79	-0.1014596	281.79	-0.1575909	281.79	-0.1274219	281.79	-0.09891946	281.79	-0.1211263	281.79	-0.08847915	281.79	-0.1004347	281.79	-0.1305887
282	1.155735	282	1.079691	282	1.115737	282	1.083109	282	1.088275	282	1.072648	282	1.072992	282	-0.1654117	281.99	-0.1002695	281.99	-0.1582129	281.99	-0.1287636	281.99	-0.1009019	281.99	-0.116627	281.99	-0.0874399	281.99	-0.1011536	281.99	-0.1318858
282.2	1.155023	282.2	1.076475	282.2	1.112807	282.2	1.078424	282.2	1.086189	282.2	1.066502	282.2	1.070477	282.2	-0.1694645	282.2	-0.09890322	282.2	-0.1555734	282.2	-0.1250542	282.2	-0.103234	282.2	-0.1215849	282.2	-0.08767727	282.2	-0.09803115	282.2	-0.1331309
282.4	1.153936	282.4	1.079974	282.4	1.11657	282.4	1.080101	282.4	1.090069	282.4	1.070266	282.4	1.072306	282.4	-0.167242	282.39	-0.1004103	282.39	-0.1548987	282.39	-0.1309166	282.39	-0.1011334	282.39	-0.1191535	282.39	-0.09111273	282.39	-0.09709888	282.39	-0.1349069
282.6	1.156156	282.6	1.076453	282.6	1.113956	282.6	1.081468	282.6	1.094202	282.6	1.073099	282.6	1.074913	282.6	-0.1706257	282.59	-0.1000588	282.59	-0.161407	282.59	-0.1261069	282.59	-0.09487876	282.59	-0.1226119	282.59	-0.08514123	282.59	-0.1001829	282.59	-0.1270977
282.8	1.154618	282.8	1.082906	282.8	1.117414	282.8	1.07938	282.8	1.092145	282.8	1.070731	282.8	1.070234	282.8	-0.1689135	282.79	-0.09684749	282.79	-0.1539555	282.79	-0.1254781	282.79	-0.096175	282.79	-0.1205158	282.79	-0.0848205	282.79	-0.09895337	282.79	-0.1347973
283	1.157877	283	1.079932	283	1.116353	283	1.077425	283	1.094561	283	1.064443	283	1.073106	283	-0.166591	282.99	-0.09841346	282.99	-0.1537056	282.99	-0.1249726	282.99	-0.09843072	282.99	-0.1200437	282.99	-0.08515972	282.99	-0.09878137	282.99	-0.1304653
283.2	1.157518	283.2	1.079632	283.2	1.113836	283.2	1.078489	283.2	1.093553	283.2	1.068473	283.2	1.07324	283.2	-0.168293	283.2	-0.09693442	283.2	-0.1555753	283.2	-0.1277571	283.2	-0.09966352	283.2	-0.1193262	283.2	-0.09281874	283.2	-0.09756286	283.2	-0.1309752
283.4	1.157817	283.4	1.077833	283.4	1.117618	283.4	1.086682	283.4	1.094109	283.4	1.067997	283.4	1.07547	283.4	-0.1701953	283.4	-0.09954445	283.4	-0.1565433	283.4	-0.1299072	283.4	-0.09936874	283.4	-0.1190651	283.4	-0.08794498	283.4	-0.09964918	283.4	-0.1290417
283.6	1.155879	283.6	1.081423	283.6	1.117889	283.6	1.081576	283.6	1.095162	283.6	1.071849	283.6	1.069243	283.6	-0.1678616	283.6	-0.09906597	283.6	-0.1538235	283.6	-0.1226927	283.6	-0.09505726	283.6	-0.1185198	283.6	-0.08752425	283.6	-0.09668907	283.6	-0.1361316
283.8	1.152781	283.8	1.081576	283.8	1.113804	283.8	1.081281	283.8	1.093546	283.8	1.068544	283.8	1.075566	283.8	-0.1712913	283.8	-0.1010312	283.8	-0.154678	283.8	-0.1274002	283.8	-0.1014669	283.8	-0.1200901	283.8	-0.08840673	283.8	-0.09900463	283.8	-0.130784
284	1.15642	284	1.082735	284	1.116673	284	1.084427	284	1.094642	284	1.074565	284	1.075121	284	-0.1701118	284	-0.09406657	284	-0.154325	284	-0.1216736	284	-0.09745834	284	-0.1195561	284	-0.08934493	284	-0.09918304	284	-0.1333147
284.2	1.159109	284.2	1.081482	284.2	1.117153	284.2	1.080122	284.2	1.096103	284.2	1.068695	284.2	1.071463	284.2	-0.1688114	284.2	-0.1009038	284.2	-0.156781	284.2	-0.1238629	284.2	-0.09922361	284.2	-0.1194355	284.2	-0.08465618	284.2	-0.1014473	284.2	-0.1334114
284.4	1.153411	284.4	1.080608	284.4	1.120332	284.4	1.079846	284.4	1.090538	284.4	1.068885	284.4	1.072644	284.4	-0.1668253	284.4	-0.1031189	284.4	-0.1604971	284.4	-0.127875	284.4	-0.09615374	284.4	-0.1200613	284.4	-0.08980136	284.4	-0.09797864	284.4	-0.1352064
284.6	1.156811	284.6	1.081813	284.6	1.116674	284.6	1.082866	284.6	1.093961	284.6	1.067899	284.6	1.076622	284.6	-0.1697192	284.6	-0.09796698	284.6	-0.1548107	284.6	-0.1287482	284.6	-0.09948372	284.6	-0.1193454	284.6	-0.08704723	284.6	-0.0963094	284.6	-0.1305447
284.8	1.155367	284.8	1.080046	284.8	1.117102	284.8	1.084618	284.8	1.092959	284.8	1.070189	284.8	1.074041	284.8	-0.1678964	284.8	-0.09559966	284.8	-0.1562004	284.8	-0.1263302	284.8	-0.09927835	284.8	-0.117352	284.8	-0.08866686	284.8	-0.09472747	284.8	-0.1296299
285	1.152697	285	1.078609	285	1.120064	285	1.079764	285	1.089731	285	1.06933	285	1.077067	285	-0.1717671	285	-0.09326527	285	-0.1543744	285	-0.1252997	285	-0.09609994	285	-0.1164031	285	-0.08335434	285	-0.09791118	285	-0.132838
285.2	1.158031	285.2	1.084276	285.2	1.115891	285.2	1.087193	285.2	1.097006	285.2	1.066707	285.2	1.073086	285.2	-0.1666159	285.2	-0.09930177	285.2	-0.1589259	285.2	-0.1195323	285.2	-0.09462373	285.2	-0.1195301	285.2	-0.08825628	285.2	-0.09785502	285.2	-0.1352635
285.4	1.150965	285.4	1.081403	285.4	1.125452	285.4	1.082637	285.4	1.094187	285.4	1.065421	285.4	1.073509	285.4	-0.1689205	285.4	-0.09797302	285.4	-0.1561677	285.4	-0.1275297	285.4	-0.1019337	285.4	-0.1180918	285.4	-0.08360238	285.4	-0.09878881	285.4	-0.1286795
285.6	1.157245	285.6	1.076693	285.6	1.117046	285.6	1.081703	285.6	1.094274	285.6	1.070003	285.6	1.077146	285.6	-0.1705129	285.6	-0.0995817	285.6	-0.1539441	285.6	-0.1257674	285.6	-0.1010451	285.6	-0.1207661	285.6	-0.08841997	285.6	-0.0996334	285.6	-0.1297556
285.8	1.157922	285.8	1.085444	285.8	1.119572	285.8	1.082153	285.8	1.09329	285.8	1.06934	285.8	1.075689	285.8	-0.1682104	285.8	-0.09978641	285.8	-0.1516066	285.8	-0.1250988	285.8	-0.09767307	285.8	-0.1153158	285.8	-0.08655657	285.8	-0.09639724	285.8	-0.1266848
286	1.157207	286	1.085302	286	1.120309	286	1.076874	286	1.09527	286	1.069679	286	1.077212	286	-0.167006	286	-0.09786745	286	-0.1534085	286	-0.1272152	286	-0.09949736	286	-0.1221265	286	-0.08922745	286	-0.09676626	286	-0.1321774
286.2	1.155119	286.2	1.080943	286.2	1.114567	286.2	1.083599	286.2	1.094082	286.2	1.067698	286.2	1.075999	286.2	-0.1704656	286.2	-0.09556366	286.2	-0.1548927	286.2	-0.1242181	286.2	-0.09502421	286.2	-0.1207043	286.2	-0.08441136	286.2	-0.09615438	286.2	-0.1264107
286.4	1.157278	286.4	1.083776	286.4	1.118821	286.4	1.081384	286.4	1.092728	286.4	1.071365	286.4	1.07806	286.4	-0.1652247	286.4	-0.1020377	286.4	-0.1549609	286.4	-0.1258681	286.4	-0.09986759	286.4	-0.1178046	286.4	-0.09142162	286.4	-0.1016273	286.4	-0.1290492
286.6	1.163393	286.6	1.078061	286.6	1.117303	286.6	1.0857	286.6	1.095895	286.6	1.072875	286.6	1.073552	286.6	-0.1702862	286.6	-0.09291014	286.6	-0.1534165	286.6	-0.1245875	286.6	-0.09786408	286.6	-0.1180659	286.6	-0.08633337	286.6	-0.09582113	286.6	-0.1297407
286.8	1.158882	286.8	1.084002	286.8	1.119622	286.8	1.086033	286.8	1.094862	286.8	1.073604	286.8	1.071778	286.8	-0.1653573	286.8	-0.09439479	286.8	-0.1542805	286.8	-0.1258347	286.8	-0.101036	286.8	-0.1215499	286.8	-0.08835039	286.8	-0.09741759	286.8	-0.1265084
287	1.154099	287	1.077897	287	1.119084	287	1.083539	287	1.096329	287	1.072281	287	1.076547	287	-0.1655811	287	-0.101329	287	-0.1545569	287	-0.1254859	287	-0.09783586	287	-0.1196424	287	-0.08553859	287	-0.0995539	287	-0.130447
287.2	1.162679	287.2	1.086723	287.2	1.115727	287.2	1.082828	287.2	1.090752	287.2	1.069088	287.2	1.073543	287.2	-0.1662998	287.2	-0.0979106	287.2	-0.1547848	287.2	-0.1222051	287.2	-0.09606858	287.2	-0.1179762	287.2	-0.08772776	287.2	-0.09698587	287.2	-0.1310294
287.4	1.160232	287.4	1.082609	287.4	1.125129	287.4	1.081458	287.4	1.101177	287.4	1.07245	287.4	1.075035	287.4	-0.1663016	287.39	-0.09623746	287.39	-0.157451	287.39	-0.1253303	287.39	-0.09786562	287.39	-0.1138397	287.39	-0.08841831	287.39	-0.09622793	287.39	-0.1272875
287.6	1.15769	287.6	1.081435	287.6	1.119137	287.6	1.087912	287.6	1.096215	287.6	1.068691	287.6	1.076676	287.6	-0.1630649	287.6	-0.09909164	287.6	-0.1497177	287.6	-0.1236713	287.6	-0.09219465	287.6	-0.1155745	287.6	-0.08577204	287.6	-0.09821674	287.6	-0.1294874
287.8	1.160035	287.8	1.084425	287.8	1.117794	287.8	1.082682	287.8	1.094967	287.8	1.072088	287.8	1.076648	287.8	-0.1653796	287.79	-0.09755916	287.79	-0.1554918	287.79	-0.1248967	287.79	-0.09796848	287.79	-0.1188525	287.79	-0.08687086	287.79	-0.09485386	287.79	-0.1302026
288	1.157653	288	1.083631	288	1.121349	288	1.083497	288	1.094632	288	1.069069	288	1.074578	288	-0.1688892	288	-0.1012419	288	-0.1513779	288	-0.1248209	288	-0.09716929	288	-0.1180503	288	-0.08642002	288	-0.09605135	288	-0.1268837
288.2	1.158864	288.2	1.085692	288.2	1.120946	288.2	1.088133	288.2	1.097127	288.2	1.073284	288.2	1.077026	288.2	-0.1666842	288.19	-0.0964389	288.19	-0.1537156	288.19	-0.1278796	288.19	-0.1017889	288.19	-0.1145435	288.19	-0.08839244	288.19	-0.09465241	288.19	-0.1314172
288.4	1.157503	288.4	1.085857	288.4	1.118749	288.4	1.083272	288.4	1.09826	288.4	1.071612	288.4	1.077496	288.4	-0.1714627	288.4	-0.09429377	288.4	-0.150672	288.4	-0.1200415	288.4	-0.09772202	288.4	-0.1186668	288.4	-0.08898428	288.4	-0.09753942	288.4	-0.1293969
288.63	1.160613	288.63	1.084495	288.63	1.121868	288.63	1.083601	288.63	1.099131	288.63	1.074907	288.63	1.076863	288.63	-0.1636833	288.59	-0.0971101	288.59	-0.1546089	288.59	-0.1232365	288.59	-0.09473108	288.59	-0.1178819	288.59	-0.08681325	288.59	-0.09258078	288.59	-0.1291326
288.82	1.162756	288.82	1.083347	288.82	1.123994	288.82	1.085726	288.82	1.098774	288.82	1.067371	288.82	1.075402	288.82	-0.1668604	288.79	-0.1022587	288.79	-0.1545955	288.79	-0.1194718	288.79	-0.09499949	288.79	-0.1187644	288.79	-0.08481468	288.79	-0.0916097	288.79	-0.129385
289	1.16085	289	1.084381	289	1.12027	289	1.085294	289	1.095419	289	1.068282	289	1.071986	289	-0.1661837	289.01	-0.09630203	289.01	-0.1524412	289.01	-0.1255212	289.01	-0.09946393	289.01	-0.121064	289.01	-0.08531741	289.01	-0.09629188	289.01	-0.1308932
289.2	1.157048	289.2	1.083788	289.2	1.123451	289.2	1.082369	289.2	1.096486	289.2	1.068026	289.2	1.07301	289.2	-0.1655628	289.2	-0.09311546	289.2	-0.1512038	289.2	-0.1225824	289.2	-0.09474167	289.2	-0.1223364	289.2	-0.08220533	289.2	-0.093628	289.2	-0.1264162
289.4	1.163008	289.4	1.079746	289.4	1.12057	289.4	1.084964	289.4	1.097997	289.4	1.071241	289.4	1.077202	289.4	-0.1661692	289.4	-0.09370592	289.4	-0.1536759	289.4	-0.1234837	289.4	-0.09417167	289.4	-0.114897	289.4	-0.08580348	289.4	-0.09426464	289.4	-0.1339243
289.6	1.167756	289.6	1.084817	289.6	1.127375	289.6	1.086291	289.6	1.09591	289.6	1.070875	289.6	1.076474	289.6	-0.168993	289.6	-0.09611177	289.6	-0.1536973	289.6	-0.1238501	289.6	-0.09846184	289.6	-0.1198061	289.6	-0.08723511	289.6	-0.09575505	289.6	-0.128881
289.8	1.165626	289.8	1.084672	289.8	1.121527	289.8	1.084839	289.8	1.094815	289.8	1.068	289.8	1.076034	289.8	-0.1673299	289.8	-0.1012013	289.8	-0.1485375	289.8	-0.1234898	289.8	-0.09636185	289.8	-0.1137974	289.8	-0.08573042	289.8	-0.09418283	289.8	-0.1272669
290	1.16271	290	1.089664	290	1.115499	290	1.084343	290	1.096395	290	1.073774	290	1.075621	290	-0.1658766	290	-0.09682968	290	-0.1594493	290	-0.1234731	290	-0.09702165	290	-0.1187115	290	-0.08581976	290	-0.09312148	290	-0.1251668
290.2	1.163022	290.2	1.08685	290.2	1.118763	290.2	1.086621	290.2	1.095297	290.2	1.068196	290.2	1.076822	290.2	-0.166437	290.2	-0.09834214	290.2	-0.1539156	290.2	-0.1217038	290.2	-0.0893523	290.2	-0.1149413	290.2	-0.08396811	290.2	-0.09528123	290.2	-0.1254919
290.4	1.160885	290.4	1.08415	290.4	1.118281	290.4	1.084904	290.4	1.096076	290.4	1.0713	290.4	1.076454	290.4	-0.1628858	290.39	-0.09339923	290.39	-0.1548062	290.39	-0.1231753	290.39	-0.0913973	290.39	-0.1135089	290.39	-0.08545931	290.39	-0.09670051	290.39	-0.1250352
290.6	1.158826	290.6	1.085688	290.6	1.123887	290.6	1.090062	290.6	1.095638	290.6	1.071721	290.6	1.076544	290.6	-0.1655859	290.6	-0.09189881	290.6	-0.1487314	290.6	-0.1199779	290.6	-0.09465193	290.6	-0.1146874	290.6	-0.08297583	290.6	-0.0928439	290.6	-0.1279806
290.8	1.166394	290.8	1.086263	290.8	1.121687	290.8	1.086441	290.8	1.097336	290.8	1.07127	290.8	1.07484	290.8	-0.1672335	290.8	-0.09484516	290.8	-0.1556402	290.8	-0.1223057	290.8	-0.09675615	290.8	-0.1189219	290.8	-0.08262206	290.8	-0.09470821	290.8	-0.1273517
291	1.160106	291	1.08604	291	1.124331	291	1.09023	291	1.100884	291	1.076374	291	1.080827	291	-0.1657345	291	-0.09615748	291	-0.1572098	291	-0.1258844	291	-0.09532499	291	-0.1185539	291	-0.0860607	291	-0.09357186	291	-0.127627
291.2	1.16136	291.2	1.091583	291.2	1.125237	291.2	1.088832	291.2	1.097871	291.2	1.072541	291.2	1.080585	291.2	-0.1648722	291.19	-0.09746497	291.19	-0.1504898	291.19	-0.1259808	291.19	-0.09179571	291.19	-0.1173218	291.19	-0.08737287	291.19	-0.0919197	291.19	-0.1297193
291.4	1.161962	291.4	1.09371	291.4	1.124075	291.4	1.083867	291.4	1.099925	291.4	1.069243	291.4	1.071767	291.4	-0.1633437	291.39	-0.09612424	291.39	-0.1480266	291.39	-0.1224292	291.39	-0.09648224	291.39	-0.1168329	291.39	-0.08692766	291.39	-0.1000392	291.39	-0.1250882
291.6	1.161672	291.6	1.083045	291.6	1.123282	291.6	1.083461	291.6	1.099153	291.6	1.073793	291.6	1.077521	291.6	-0.1677851	291.6	-0.09512203	291.6	-0.1519449	291.6	-0.1238433	291.6	-0.09714489	291.6	-0.1152662	291.6	-0.08297282	291.6	-0.0934752	291.6	-0.1238983
291.82	1.162428	291.82	1.089698	291.82	1.123951	291.82	1.085878	291.82	1.096728	291.82	1.077354	291.82	1.082553	291.82	-0.1656297	291.8	-0.09827553	291.8	-0.1526239	291.8	-0.1215737	291.8	-0.09342261	291.8	-0.1149158	291.8	-0.08207577	291.8	-0.09465457	291.8	-0.1266725
292	1.163961	292	1.087853	292	1.116592	292	1.084648	292	1.099457	292	1.072859	292	1.078998	292	-0.159758	292	-0.09382713	292	-0.1547287	292	-0.1207212	292	-0.08999924	292	-0.1193508	292	-0.08786062	292	-0.09015574	292	-0.1266899
292.2	1.163855	292.2	1.08528	292.2	1.121914	292.2	1.084873	292.2	1.097903	292.2	1.075379	292.2	1.080654	292.2	-0.1640561	292.2	-0.09914096	292.2	-0.155684	292.2	-0.1215989	292.2	-0.09822982	292.2	-0.1161283	292.2	-0.08208752	292.2	-0.0926328	292.2	-0.1237895
292.4	1.167091	292.4	1.090852	292.4	1.127043	292.4	1.080509	292.4	1.098614	292.4	1.074704	292.4	1.079228	292.4	-0.1665379	292.4	-0.09487488	292.4	-0.1554108	292.4	-0.1234776	292.4	-0.09453867	292.4	-0.1176544	292.4	-0.08477452	292.4	-0.09167593	292.4	-0.1225339
292.6	1.163647	292.6	1.087468	292.6	1.12342	292.6	1.084806	292.6	1.096492	292.6	1.071731	292.6	1.075889	292.6	-0.1705795	292.59	-0.09625949	292.59	-0.1515186	292.59	-0.1230434	292.59	-0.09038153	292.59	-0.1190059	292.59	-0.08804861	292.59	-0.0939342	292.59	-0.124763
292.8	1.165003	292.8	1.091692	292.8	1.120875	292.8	1.086977	292.8	1.098066	292.8	1.076984	292.8	1.082977	292.8	-0.1624103	292.79	-0.09673625	292.79	-0.1507872	292.79	-0.1268268	292.79	-0.09537441	292.79	-0.115316	292.79	-0.08476338	292.79	-0.09718941	292.79	-0.1287864
293	1.165518	293	1.085584	293	1.120695	293	1.08917	293	1.100422	293	1.075457	293	1.079058	293	-0.1649833	293	-0.08983316	293	-0.1538429	293	-0.1191414	293	-0.09504673	293	-0.1180311	293	-0.08322836	293	-0.09800044	293	-0.1268486
293.2	1.165316	293.2	1.089886	293.2	1.122966	293.2	1.085476	293.2	1.10221	293.2	1.071636	293.2	1.079138	293.2	-0.1676719	293.19	-0.09475644	293.19	-0.1485529	293.19	-0.1214734	293.19	-0.09680915	293.19	-0.112299	293.19	-0.08144369	293.19	-0.09333334	293.19	-0.1237469
293.4	1.165529	293.4	1.090263	293.4	1.124321	293.4	1.085116	293.4	1.097135	293.4	1.077859	293.4	1.077701	293.4	-0.160471	293.39	-0.09050249	293.39	-0.1516128	293.39	-0.1196096	293.39	-0.09301794	293.39	-0.1165082	293.39	-0.08543078	293.39	-0.09477836	293.39	-0.1240156
293.6	1.166289	293.6	1.089264	293.6	1.124909	293.6	1.09133	293.6	1.101958	293.6	1.072808	293.6	1.083884	293.6	-0.1602018	293.59	-0.0973591	293.59	-0.1517454	293.59	-0.1215245	293.59	-0.09321917	293.59	-0.1168858	293.59	-0.08606201	293.59	-0.09859261	293.59	-0.1268448
293.8	1.167631	293.8	1.087678	293.8	1.123577	293.8	1.090814	293.8	1.100365	293.8	1.071537	293.8	1.074619	293.8	-0.1638645	293.79	-0.09390823	293.79	-0.1533373	293.79	-0.1175832	293.79	-0.0936329	293.79	-0.1130957	293.79	-0.08194797	293.79	-0.09477068	293.79	-0.1262989
294	1.169962	294	1.093238	294	1.121037	294	1.087766	294	1.102539	294	1.071095	294	1.07975	294	-0.1651659	294	-0.09095795	294	-0.150587	294	-0.1214925	294	-0.09490393	294	-0.1158061	294	-0.08032311	294	-0.08823045	294	-0.128884
294.2	1.164051	294.2	1.087028	294.2	1.126172	294.2	1.085711	294.2	1.105999	294.2	1.073776	294.2	1.080894	294.2	-0.1648279	294.2	-0.09703565	294.2	-0.150568	294.2	-0.1189403	294.2	-0.08813717	294.2	-0.1136225	294.2	-0.08521237	294.2	-0.09074023	294.2	-0.1229727
294.4	1.169169	294.4	1.089461	294.4	1.124	294.4	1.0868	294.4	1.104365	294.4	1.074435	294.4	1.080349	294.4	-0.1616458	294.39	-0.09293459	294.39	-0.1529246	294.39	-0.1209818	294.39	-0.09342407	294.39	-0.1139683	294.39	-0.08110388	294.39	-0.0890095	294.39	-0.1286671
294.6	1.165132	294.6	1.086367	294.6	1.12368	294.6	1.090973	294.6	1.100447	294.6	1.081838	294.6	1.082614	294.6	-0.1608031	294.59	-0.0898594	294.59	-0.1509998	294.59	-0.1224596	294.59	-0.09094961	294.59	-0.1122902	294.59	-0.08483154	294.59	-0.09581011	294.59	-0.1308763
294.8	1.166051	294.8	1.089358	294.8	1.124248	294.8	1.089028	294.8	1.098599	294.8	1.076909	294.8	1.074743	294.8	-0.1609203	294.8	-0.0951713	294.8	-0.1533424	294.8	-0.1196059	294.8	-0.09723154	294.8	-0.1127407	294.8	-0.0828729	294.8	-0.09418239	294.8	-0.1252644
295	1.165379	295	1.092582	295	1.123716	295	1.086486	295	1.098578	295	1.070109	295	1.080646	295	-0.1634866	294.99	-0.09540671	294.99	-0.1549017	294.99	-0.123605	294.99	-0.08706865	294.99	-0.1100096	294.99	-0.08460475	294.99	-0.08991872	294.99	-0.1259049
295.2	1.168137	295.2	1.088636	295.2	1.126834	295.2	1.096414	295.2	1.101731	295.2	1.073323	295.2	1.083352	295.2	-0.1642421	295.19	-0.09522871	295.19	-0.1492036	295.19	-0.1156649	295.19	-0.09487013	295.19	-0.113678	295.19	-0.08425681	295.19	-0.08864363	295.19	-0.1240269
295.4	1.165703	295.4	1.09293	295.4	1.12325	295.4	1.088526	295.4	1.102293	295.4	1.075577	295.4	1.076525	295.4	-0.1617528	295.39	-0.09243926	295.39	-0.1483453	295.39	-0.1227745	295.39	-0.09574401	295.39	-0.1149009	295.39	-0.08094307	295.39	-0.09580386	295.39	-0.1288297
295.6	1.169484	295.6	1.09218	295.6	1.130934	295.6	1.086874	295.6	1.100967	295.6	1.073329	295.6	1.078291	295.6	-0.1637652	295.6	-0.09187877	295.6	-0.1514188	295.6	-0.1212207	295.6	-0.09242442	295.6	-0.1128794	295.6	-0.08253748	295.6	-0.09138547	295.6	-0.1259957
295.8	1.166805	295.8	1.087494	295.8	1.126312	295.8	1.091145	295.8	1.101766	295.8	1.076833	295.8	1.080576	295.8	-0.1625739	295.79	-0.09492299	295.79	-0.1480412	295.79	-0.1203408	295.79	-0.09121186	295.79	-0.1108703	295.79	-0.08422945	295.79	-0.09157009	295.79	-0.1273937
296	1.166184	296	1.085192	296	1.128906	296	1.095797	296	1.09655	296	1.077175	296	1.080985	296	-0.159428	296	-0.09461458	296	-0.146947	296	-0.1201435	296	-0.09185162	296	-0.1152687	296	-0.0844984	296	-0.09516425	296	-0.1247015
296.2	1.170196	296.2	1.089648	296.2	1.124265	296.2	1.087284	296.2	1.103101	296.2	1.073916	296.2	1.079663	296.2	-0.160415	296.2	-0.09170547	296.2	-0.1528176	296.2	-0.1205545	296.2	-0.09063287	296.2	-0.1162411	296.2	-0.08640116	296.2	-0.09054754	296.2	-0.1258049
296.4	1.167895	296.4	1.091124	296.4	1.12741	296.4	1.088136	296.4	1.099401	296.4	1.076236	296.4	1.079872	296.4	-0.1633853	296.39	-0.0920716	296.39	-0.1559705	296.39	-0.1181243	296.39	-0.09214377	296.39	-0.1113896	296.39	-0.08255916	296.39	-0.09025525	296.39	-0.1260345
296.6	1.166751	296.6	1.093235	296.6	1.126454	296.6	1.091151	296.6	1.099311	296.6	1.078196	296.6	1.083	296.6	-0.1622928	296.6	-0.09189624	296.6	-0.1529026	296.6	-0.1175875	296.6	-0.09811879	296.6	-0.1171659	296.6	-0.08562363	296.6	-0.0938174	296.6	-0.1202134
296.8	1.170105	296.8	1.089642	296.8	1.125917	296.8	1.090615	296.8	1.100354	296.8	1.074891	296.8	1.083459	296.8	-0.1574804	296.79	-0.09060489	296.79	-0.1520077	296.79	-0.1185007	296.79	-0.09077175	296.79	-0.1156558	296.79	-0.08274403	296.79	-0.09389269	296.79	-0.1237691
297	1.166586	297	1.092833	297	1.125927	297	1.088167	297	1.097988	297	1.073602	297	1.080713	297	-0.1609203	296.99	-0.09441177	296.99	-0.1526728	296.99	-0.1156791	296.99	-0.0927527	296.99	-0.114787	296.99	-0.08071127	296.99	-0.09349908	296.99	-0.1252007
297.2	1.169288	297.2	1.09151	297.2	1.123328	297.2	1.090494	297.2	1.102977	297.2	1.073402	297.2	1.079907	297.2	-0.1642381	297.2	-0.09362034	297.2	-0.1500137	297.2	-0.1232759	297.2	-0.09352911	297.2	-0.116052	297.2	-0.08448003	297.2	-0.09608504	297.2	-0.1233537
297.4	1.16555	297.4	1.08975	297.4	1.125329	297.4	1.086622	297.4	1.105126	297.4	1.079903	297.4	1.074884	297.4	-0.1638987	297.4	-0.08875255	297.4	-0.1435416	297.4	-0.1194357	297.4	-0.0933048	297.4	-0.1124616	297.4	-0.08801562	297.4	-0.09334048	297.4	-0.1270019
297.6	1.166167	297.6	1.092612	297.6	1.125829	297.6	1.090979	297.6	1.099874	297.6	1.076138	297.6	1.078076	297.6	-0.1598508	297.59	-0.08830407	297.59	-0.1468201	297.59	-0.1220275	297.59	-0.09146782	297.59	-0.1151775	297.59	-0.08026507	297.59	-0.0939009	297.59	-0.1214622
297.8	1.171014	297.8	1.098732	297.8	1.12718	297.8	1.0941	297.8	1.097323	297.8	1.075041	297.8	1.081731	297.8	-0.1591381	297.8	-0.09221176	297.8	-0.1498328	297.8	-0.1189631	297.8	-0.09230656	297.8	-0.1129925	297.8	-0.08112261	297.8	-0.08910449	297.8	-0.1232463
298	1.170283	298	1.095126	298	1.126848	298	1.089402	298	1.103398	298	1.078496	298	1.082524	298	-0.1603664	297.99	-0.09029433	297.99	-0.1458447	297.99	-0.1178068	297.99	-0.0907772	297.99	-0.1180607	297.99	-0.08122877	297.99	-0.09113969	297.99	-0.1239467
298.2	1.173864	298.2	1.090455	298.2	1.127813	298.2	1.090146	298.2	1.104357	298.2	1.078083	298.2	1.08012	298.2	-0.1620929	298.2	-0.08940281	298.2	-0.148746	298.2	-0.1176456	298.2	-0.09352717	298.2	-0.1149027	298.2	-0.08198281	298.2	-0.09689303	298.2	-0.1248524
298.4	1.17302	298.4	1.094278	298.4	1.127599	298.4	1.093511	298.4	1.103196	298.4	1.079771	298.4	1.076307	298.4	-0.1610975	298.4	-0.09461857	298.4	-0.1512435	298.4	-0.1177739	298.4	-0.0908782	298.4	-0.1091857	298.4	-0.07837774	298.4	-0.09264499	298.4	-0.1254108
298.6	1.168906	298.6	1.098134	298.6	1.129644	298.6	1.09237	298.6	1.101828	298.6	1.080216	298.6	1.083263	298.6	-0.1593653	298.59	-0.09006304	298.59	-0.145656	298.59	-0.1228253	298.59	-0.08966368	298.59	-0.1158098	298.59	-0.07998874	298.59	-0.08982188	298.59	-0.1254484
298.8	1.1699	298.8	1.093417	298.8	1.129537	298.8	1.091189	298.8	1.101752	298.8	1.07819	298.8	1.080404	298.8	-0.1600593	298.8	-0.09201087	298.8	-0.1482012	298.8	-0.1198906	298.8	-0.09086291	298.8	-0.1141097	298.8	-0.0799105	298.8	-0.09342999	298.8	-0.1234911
299	1.176934	299	1.095217	299	1.129221	299	1.090025	299	1.102736	299	1.080366	299	1.084436	299	-0.1596471	298.99	-0.09287546	298.99	-0.1488764	298.99	-0.1181739	298.99	-0.08893764	298.99	-0.1155441	298.99	-0.08316944	298.99	-0.09151947	298.99	-0.1208514
299.2	1.17477	299.2	1.090234	299.2	1.129631	299.2	1.091897	299.2	1.107111	299.2	1.077188	299.2	1.085397	299.2	-0.1633268	299.19	-0.09003401	299.19	-0.1485248	299.19	-0.1200481	299.19	-0.09270803	299.19	-0.11347	299.19	-0.08263963	299.19	-0.09068888	299.19	-0.1260276
299.4	1.176253	299.4	1.09367	299.4	1.13109	299.4	1.089896	299.4	1.101897	299.4	1.07423	299.4	1.076489	299.4	-0.1634731	299.39	-0.09085108	299.39	-0.1477772	299.39	-0.1186499	299.39	-0.09103379	299.39	-0.1108538	299.39	-0.08203702	299.39	-0.08997263	299.39	-0.1223986
299.6	1.171769	299.6	1.094416	299.6	1.127823	299.6	1.093092	299.6	1.10129	299.6	1.07496	299.6	1.078499	299.6	-0.1630753	299.59	-0.09423047	299.59	-0.152149	299.59	-0.1230121	299.59	-0.0898637	299.59	-0.1084765	299.59	-0.08267728	299.59	-0.09085652	299.59	-0.1215261
299.8	1.170941	299.8	1.095163	299.8	1.130024	299.8	1.088367	299.8	1.106435	299.8	1.078569	299.8	1.077912	299.8	-0.165202	299.79	-0.09239455	299.79	-0.1495707	299.79	-0.1204637	299.79	-0.09274825	299.79	-0.1095132	299.79	-0.08482432	299.79	-0.09118209	299.79	-0.1241426
300	1.176921	300	1.091946	300	1.128812	300	1.091569	300	1.104532	300	1.08015	300	1.078663	300	-0.1597489	300	-0.09001892	300	-0.149396	300	-0.1206207	300	-0.09409855	300	-0.1119865	300	-0.08303623	300	-0.09265942	300	-0.1235491
300.2	1.1745	300.2	1.092871	300.2	1.130137	300.2	1.092853	300.2	1.103079	300.2	1.07665	300.2	1.081485	300.2	-0.1606054	300.19	-0.09200691	300.19	-0.1419666	300.19	-0.118801	300.19	-0.09178232	300.19	-0.1154467	300.19	-0.08206546	300.19	-0.08952234	300.19	-0.1214896
300.4	1.173779	300.4	1.09178	300.4	1.128567	300.4	1.095819	300.4	1.102582	300.4	1.077489	300.4	1.080607	300.4	-0.1609637	300.39	-0.08977776	300.39	-0.1509757	300.39	-0.1162106	300.39	-0.09041261	300.39	-0.1187951	300.39	-0.07702045	300.39	-0.09092271	300.39	-0.1274153
300.6	1.168875	300.6	1.095806	300.6	1.129975	300.6	1.093928	300.6	1.102072	300.6	1.079924	300.6	1.086104	300.6	-0.1617652	300.59	-0.09472384	300.59	-0.1495553	300.59	-0.1170551	300.59	-0.0879293	300.59	-0.1094826	300.59	-0.0806445	300.59	-0.08875231	300.59	-0.1217034
300.8	1.173481	300.8	1.092911	300.8	1.129328	300.8	1.090524	300.8	1.105942	300.8	1.080846	300.8	1.080779	300.8	-0.1583599	300.79	-0.09443142	300.79	-0.1474899	300.79	-0.1164613	300.79	-0.08985157	300.79	-0.1124258	300.79	-0.08183512	300.79	-0.09256254	300.79	-0.1219031
301	1.174267	301	1.095969	301	1.127506	301	1.095037	301	1.102228	301	1.07733	301	1.08071	301	-0.1566037	300.99	-0.09523451	300.99	-0.1538341	300.99	-0.1190123	300.99	-0.08967667	300.99	-0.1119352	300.99	-0.07734101	300.99	-0.08831644	300.99	-0.1222213
301.2	1.171631	301.2	1.089698	301.2	1.134384	301.2	1.093347	301.2	1.101043	301.2	1.07866	301.2	1.083479	301.2	-0.1579129	301.19	-0.08907325	301.19	-0.149156	301.19	-0.1163245	301.19	-0.09153604	301.19	-0.1086889	301.19	-0.0792789	301.19	-0.09087567	301.19	-0.1234834
301.4	1.17534	301.4	1.093866	301.4	1.131526	301.4	1.091851	301.4	1.101158	301.4	1.076156	301.4	1.080935	301.4	-0.1594956	301.39	-0.08700275	301.39	-0.1491183	301.39	-0.1176773	301.39	-0.09116071	301.39	-0.1162192	301.39	-0.08213324	301.39	-0.09180145	301.39	-0.1242013
301.6	1.176548	301.6	1.098868	301.6	1.129235	301.6	1.092158	301.6	1.099574	301.6	1.077064	301.6	1.082885	301.6	-0.1603713	301.59	-0.09148165	301.59	-0.1497323	301.59	-0.1166432	301.59	-0.09065975	301.59	-0.1089378	301.59	-0.07924685	301.59	-0.08550666	301.59	-0.1251854
301.8	1.17219	301.8	1.093829	301.8	1.130871	301.8	1.086868	301.8	1.106769	301.8	1.078993	301.8	1.082856	301.8	-0.1595881	301.79	-0.09326851	301.79	-0.1486199	301.79	-0.1173317	301.79	-0.08615453	301.79	-0.109583	301.79	-0.08369847	301.79	-0.08883274	301.79	-0.1214084
302	1.17888	302	1.09843	302	1.133489	302	1.091707	302	1.108355	302	1.077166	302	1.079731	302	-0.1603293	301.99	-0.0860743	301.99	-0.1491448	301.99	-0.1178786	301.99	-0.08828928	301.99	-0.1113553	301.99	-0.08127222	301.99	-0.09116287	301.99	-0.1217032
302.2	1.177382	302.2	1.102382	302.2	1.127844	302.2	1.093829	302.2	1.103752	302.2	1.077997	302.2	1.083212	302.2	-0.1637743	302.19	-0.09161054	302.19	-0.1467488	302.19	-0.1203496	302.19	-0.08930089	302.19	-0.1142045	302.19	-0.08116208	302.19	-0.0851832	302.19	-0.1246757
302.4	1.176577	302.4	1.097081	302.4	1.130946	302.4	1.09476	302.4	1.10326	302.4	1.079746	302.4	1.081681	302.4	-0.1599846	302.39	-0.08982109	302.39	-0.1463357	302.39	-0.1182864	302.39	-0.08876681	302.39	-0.1098147	302.39	-0.07879128	302.39	-0.09020241	302.39	-0.1211807
302.6	1.174669	302.6	1.098057	302.6	1.13216	302.6	1.090978	302.6	1.103256	302.6	1.076449	302.6	1.082241	302.6	-0.160303	302.59	-0.08934521	302.59	-0.1462331	302.59	-0.1173405	302.59	-0.08983525	302.59	-0.1119481	302.59	-0.07883845	302.59	-0.09083124	302.59	-0.1234407
302.8	1.175698	302.8	1.095173	302.8	1.131037	302.8	1.094604	302.8	1.105537	302.8	1.079018	302.8	1.081696	302.8	-0.15373	302.79	-0.08649715	302.79	-0.1511607	302.79	-0.1172244	302.79	-0.08621725	302.79	-0.1128315	302.79	-0.08190124	302.79	-0.09341967	302.79	-0.1255728
303	1.17562	303	1.097979	303	1.12747	303	1.092294	303	1.106553	303	1.085144	303	1.080013	303	-0.1609908	302.99	-0.08518797	302.99	-0.1462469	302.99	-0.1161087	302.99	-0.08959768	302.99	-0.1144289	302.99	-0.07892654	302.99	-0.09240568	302.99	-0.1264165
303.2	1.174258	303.2	1.100439	303.2	1.131794	303.2	1.093845	303.2	1.102503	303.2	1.082272	303.2	1.084242	303.2	-0.1607968	303.2	-0.09395569	303.2	-0.1512012	303.2	-0.1163666	303.2	-0.08898354	303.2	-0.1139634	303.2	-0.08269233	303.2	-0.0864316	303.2	-0.1260119
303.4	1.172543	303.4	1.095904	303.4	1.130679	303.4	1.094427	303.4	1.104702	303.4	1.084589	303.4	1.083995	303.4	-0.160656	303.39	-0.08949678	303.39	-0.1450125	303.39	-0.1150252	303.39	-0.08578777	303.39	-0.1137847	303.39	-0.08229585	303.39	-0.08971864	303.39	-0.1264298
303.6	1.17318	303.6	1.096295	303.6	1.128817	303.6	1.095691	303.6	1.109379	303.6	1.07956	303.6	1.083201	303.6	-0.1585284	303.6	-0.09074447	303.6	-0.1471349	303.6	-0.1176621	303.6	-0.09121771	303.6	-0.1092808	303.6	-0.08138656	303.6	-0.09030948	303.6	-0.1191835
303.8	1.17742	303.8	1.094381	303.8	1.128408	303.8	1.094627	303.8	1.105107	303.8	1.076643	303.8	1.084258	303.8	-0.1609861	303.79	-0.08938719	303.79	-0.1469786	303.79	-0.1165422	303.79	-0.09446742	303.79	-0.1137796	303.79	-0.07919541	303.79	-0.08995899	303.79	-0.1217029
304	1.174657	304	1.098513	304	1.13079	304	1.09104	304	1.104791	304	1.0794	304	1.083257	304	-0.1562573	303.99	-0.0864381	303.99	-0.1447602	303.99	-0.1165032	303.99	-0.08826206	303.99	-0.1059394	303.99	-0.08027201	303.99	-0.08789898	303.99	-0.1206085
304.2	1.173423	304.2	1.098556	304.2	1.132984	304.2	1.092262	304.2	1.109145	304.2	1.081224	304.2	1.081686	304.2	-0.1622033	304.19	-0.08667923	304.19	-0.1475298	304.19	-0.1185087	304.19	-0.08389156	304.19	-0.1108746	304.19	-0.08133625	304.19	-0.08929228	304.19	-0.1210474
304.4	1.172967	304.4	1.094738	304.4	1.130017	304.4	1.094696	304.4	1.105094	304.4	1.078982	304.4	1.078575	304.4	-0.1598305	304.4	-0.08718805	304.4	-0.1489164	304.4	-0.1196023	304.4	-0.08976798	304.4	-0.111569	304.4	-0.07992342	304.4	-0.08853295	304.4	-0.1242987
304.6	1.178061	304.6	1.096881	304.6	1.134621	304.6	1.095891	304.6	1.0994	304.6	1.080386	304.6	1.087294	304.6	-0.1633689	304.59	-0.08866552	304.59	-0.1457997	304.59	-0.1200579	304.59	-0.08712932	304.59	-0.1120289	304.59	-0.08084809	304.59	-0.0894887	304.59	-0.1195829
304.8	1.177454	304.8	1.096365	304.8	1.132789	304.8	1.088643	304.8	1.105033	304.8	1.081358	304.8	1.087623	304.8	-0.1596165	304.8	-0.08927	304.8	-0.1440815	304.8	-0.1179466	304.8	-0.08689161	304.8	-0.1059073	304.8	-0.0777151	304.8	-0.08760295	304.8	-0.1191373
305	1.178136	305	1.098104	305	1.131372	305	1.093639	305	1.104572	305	1.082009	305	1.082901	305	-0.1578522	305	-0.0906954	305	-0.1457573	305	-0.1170945	305	-0.08603812	305	-0.1098944	305	-0.08095388	305	-0.08925896	305	-0.1215239
305.2	1.179316	305.2	1.098715	305.2	1.132038	305.2	1.094562	305.2	1.10517	305.2	1.07818	305.2	1.082308	305.2	-0.1561487	305.2	-0.08991473	305.2	-0.1459268	305.2	-0.1153408	305.2	-0.08894142	305.2	-0.1111615	305.2	-0.07797699	305.2	-0.09040707	305.2	-0.1186725
305.4	1.178673	305.4	1.095726	305.4	1.134734	305.4	1.094707	305.4	1.105791	305.4	1.077957	305.4	1.083548	305.4	-0.156315	305.39	-0.08662234	305.39	-0.1483109	305.39	-0.1180824	305.39	-0.0895209	305.39	-0.112219	305.39	-0.0798994	305.39	-0.08934323	305.39	-0.1233995
305.6	1.177882	305.6	1.103863	305.6	1.131188	305.6	1.094667	305.6	1.108745	305.6	1.083164	305.6	1.084887	305.6	-0.1589642	305.6	-0.0868002	305.6	-0.1461218	305.6	-0.1152375	305.6	-0.08731755	305.6	-0.1120591	305.6	-0.08066823	305.6	-0.08928265	305.6	-0.1188822
305.8	1.179934	305.8	1.098797	305.8	1.133265	305.8	1.093816	305.8	1.104705	305.8	1.079057	305.8	1.088242	305.8	-0.1589335	305.8	-0.09313931	305.8	-0.144766	305.8	-0.1185961	305.8	-0.08750182	305.8	-0.1105486	305.8	-0.08219287	305.8	-0.09072587	305.8	-0.1188623
306	1.184438	306	1.095993	306	1.12652	306	1.095142	306	1.105078	306	1.079647	306	1.082359	306	-0.1570562	306	-0.08719248	306	-0.1470972	306	-0.1173156	306	-0.08748129	306	-0.1068301	306	-0.07916837	306	-0.08748382	306	-0.1225045
306.2	1.176877	306.2	1.099326	306.2	1.131981	306.2	1.096837	306.2	1.104337	306.2	1.084395	306.2	1.08487	306.2	-0.1571506	306.2	-0.08512294	306.2	-0.1453892	306.2	-0.1216624	306.2	-0.09205796	306.2	-0.1127156	306.2	-0.07600269	306.2	-0.09205745	306.2	-0.1192953
306.4	1.179475	306.4	1.098617	306.4	1.132537	306.4	1.096887	306.4	1.109695	306.4	1.082846	306.4	1.089281	306.4	-0.1581596	306.4	-0.09118095	306.4	-0.1435928	306.4	-0.114256	306.4	-0.08863387	306.4	-0.1093075	306.4	-0.07914667	306.4	-0.08501115	306.4	-0.119761
306.6	1.180055	306.6	1.104648	306.6	1.136529	306.6	1.099098	306.6	1.107012	306.6	1.082955	306.6	1.084399	306.6	-0.1602063	306.6	-0.0887006	306.6	-0.1458839	306.6	-0.1179743	306.6	-0.08637268	306.6	-0.1114733	306.6	-0.07598916	306.6	-0.08757559	306.6	-0.1236586
306.8	1.178626	306.8	1.102596	306.8	1.131112	306.8	1.094311	306.8	1.107737	306.8	1.081585	306.8	1.079473	306.8	-0.1572574	306.8	-0.08874184	306.8	-0.1425001	306.8	-0.1158519	306.8	-0.08617775	306.8	-0.1121135	306.8	-0.0769908	306.8	-0.0862939	306.8	-0.1232238
307	1.179813	307	1.102047	307	1.133323	307	1.096583	307	1.105751	307	1.081844	307	1.080881	307	-0.1581717	307	-0.08843771	307	-0.146261	307	-0.1183149	307	-0.08753335	307	-0.106563	307	-0.07742854	307	-0.08592799	307	-0.1222612
307.2	1.178293	307.2	1.098902	307.2	1.133327	307.2	1.098674	307.2	1.106701	307.2	1.08332	307.2	1.085827	307.2	-0.1600005	307.19	-0.08802029	307.19	-0.1442627	307.19	-0.1137263	307.19	-0.08524572	307.19	-0.1105167	307.19	-0.08226644	307.19	-0.08436038	307.19	-0.1205527
307.4	1.176612	307.4	1.101792	307.4	1.132794	307.4	1.092325	307.4	1.107625	307.4	1.081111	307.4	1.085146	307.4	-0.158607	307.4	-0.08712427	307.4	-0.143931	307.4	-0.115459	307.4	-0.08701766	307.4	-0.1093923	307.4	-0.07812098	307.4	-0.09141545	307.4	-0.1238267
307.6	1.183425	307.6	1.101466	307.6	1.132275	307.6	1.098521	307.6	1.107575	307.6	1.083927	307.6	1.083679	307.6	-0.1582065	307.59	-0.08690421	307.59	-0.1448217	307.59	-0.113558	307.59	-0.08743289	307.59	-0.1110201	307.59	-0.08394887	307.59	-0.08617393	307.59	-0.1212505
307.8	1.178411	307.8	1.094273	307.8	1.136461	307.8	1.094349	307.8	1.109545	307.8	1.079099	307.8	1.083484	307.8	-0.1570339	307.8	-0.08586132	307.8	-0.1443594	307.8	-0.1130715	307.8	-0.08698886	307.8	-0.1104422	307.8	-0.07819021	307.8	-0.08568665	307.8	-0.1239341
308	1.179451	308	1.096923	308	1.137515	308	1.093589	308	1.11009	308	1.079151	308	1.087834	308	-0.1570513	308	-0.08626667	308	-0.1429182	308	-0.1149947	308	-0.09153454	308	-0.110993	308	-0.08092692	308	-0.08745874	308	-0.1194247
308.2	1.181445	308.2	1.101248	308.2	1.136999	308.2	1.096395	308.2	1.108606	308.2	1.082851	308.2	1.086707	308.2	-0.1559407	308.2	-0.08686434	308.2	-0.1450096	308.2	-0.1165305	308.2	-0.08724055	308.2	-0.1076523	308.2	-0.07685052	308.2	-0.08289717	308.2	-0.1199046
308.4	1.182941	308.4	1.103391	308.4	1.129517	308.4	1.096124	308.4	1.110747	308.4	1.084774	308.4	1.088277	308.4	-0.1554023	308.4	-0.08435488	308.4	-0.1404787	308.4	-0.114066	308.4	-0.08649902	308.4	-0.106759	308.4	-0.08346666	308.4	-0.08571368	308.4	-0.120913
308.63	1.181026	308.63	1.10085	308.63	1.137589	308.63	1.097126	308.63	1.10839	308.63	1.082093	308.63	1.084137	308.63	-0.1573756	308.6	-0.08512828	308.6	-0.1444288	308.6	-0.1172218	308.6	-0.09053744	308.6	-0.1096748	308.6	-0.07502135	308.6	-0.08693501	308.6	-0.1232976
308.8	1.179682	308.8	1.098668	308.8	1.132122	308.8	1.093366	308.8	1.11099	308.8	1.080954	308.8	1.085824	308.8	-0.1498593	308.8	-0.08725107	308.8	-0.1436634	308.8	-0.1169164	308.8	-0.08878639	308.8	-0.1091604	308.8	-0.07696386	308.8	-0.08673695	308.8	-0.1214185
309	1.181265	309	1.104863	309	1.134643	309	1.094807	309	1.107346	309	1.081838	309	1.085571	309	-0.1574818	309	-0.08203494	309	-0.1393456	309	-0.1175203	309	-0.09038445	309	-0.1067526	309	-0.07678632	309	-0.08647685	309	-0.1161803
309.2	1.182175	309.2	1.102734	309.2	1.134487	309.2	1.094125	309.2	1.107546	309.2	1.081831	309.2	1.089044	309.2	-0.1510484	309.2	-0.08559062	309.2	-0.1426112	309.2	-0.1140115	309.2	-0.0878894	309.2	-0.107331	309.2	-0.07816483	309.2	-0.08595184	309.2	-0.121576
309.4	1.179181	309.4	1.100221	309.4	1.139143	309.4	1.099076	309.4	1.113608	309.4	1.084246	309.4	1.083491	309.4	-0.153902	309.39	-0.0864726	309.39	-0.1437674	309.39	-0.1118226	309.39	-0.08723987	309.39	-0.107515	309.39	-0.07846732	309.39	-0.09059668	309.39	-0.1186359
309.6	1.183458	309.6	1.095923	309.6	1.134001	309.6	1.097962	309.6	1.103446	309.6	1.078561	309.6	1.088163	309.6	-0.1580998	309.59	-0.09029499	309.59	-0.1447753	309.59	-0.1133819	309.59	-0.0876646	309.59	-0.1144459	309.59	-0.07844488	309.59	-0.08551921	309.59	-0.1198823
309.8	1.180486	309.8	1.105179	309.8	1.137355	309.8	1.099502	309.8	1.105279	309.8	1.078461	309.8	1.089897	309.8	-0.1575364	309.8	-0.08787078	309.8	-0.1459652	309.8	-0.1134329	309.8	-0.0859402	309.8	-0.1111006	309.8	-0.07389903	309.8	-0.09086227	309.8	-0.1189409
310	1.182818	310	1.107114	310	1.132755	310	1.096423	310	1.10486	310	1.083408	310	1.084685	310	-0.1531943	310	-0.0859678	310	-0.1437355	310	-0.1096833	310	-0.08788291	310	-0.106274	310	-0.079542	310	-0.08700899	310	-0.123254
310.2	1.180537	310.2	1.106418	310.2	1.133754	310.2	1.096527	310.2	1.110688	310.2	1.083434	310.2	1.090542	310.2	-0.1542147	310.2	-0.09273218	310.2	-0.1467945	310.2	-0.1098612	310.2	-0.0865842	310.2	-0.1106248	310.2	-0.07411452	310.2	-0.08563213	310.2	-0.1145659
310.4	1.185097	310.4	1.102381	310.4	1.13861	310.4	1.097272	310.4	1.107708	310.4	1.086553	310.4	1.085208	310.4	-0.1526909	310.4	-0.0860121	310.4	-0.1414792	310.4	-0.1200098	310.4	-0.08777393	310.4	-0.1074993	310.4	-0.08186658	310.4	-0.0839642	310.4	-0.11857
310.6	1.179016	310.6	1.09976	310.6	1.139689	310.6	1.102036	310.6	1.111095	310.6	1.084584	310.6	1.0893	310.6	-0.1580338	310.6	-0.09254505	310.6	-0.1392921	310.6	-0.1169427	310.6	-0.0854763	310.6	-0.1041635	310.6	-0.07517418	310.6	-0.08323117	310.6	-0.1188733
310.8	1.18508	310.8	1.100583	310.8	1.135585	310.8	1.100282	310.8	1.10801	310.8	1.083093	310.8	1.090498	310.8	-0.156017	310.8	-0.08909822	310.8	-0.1495843	310.8	-0.113549	310.8	-0.08950099	310.8	-0.1124871	310.8	-0.0768114	310.8	-0.08822154	310.8	-0.124784
311	1.185182	311	1.105504	311	1.13592	311	1.099259	311	1.111281	311	1.082395	311	1.086159	311	-0.1573987	311	-0.08626942	311	-0.1429438	311	-0.1166315	311	-0.08071401	311	-0.1121743	311	-0.07761781	311	-0.08857299	311	-0.1162497
311.2	1.1806	311.2	1.102759	311.2	1.133815	311.2	1.095394	311.2	1.114149	311.2	1.084811	311.2	1.089463	311.2	-0.1526139	311.2	-0.08945173	311.2	-0.1451622	311.2	-0.1138759	311.2	-0.08091071	311.2	-0.1073474	311.2	-0.07655756	311.2	-0.09086978	311.2	-0.1195536
311.4	1.180494	311.4	1.103666	311.4	1.134359	311.4	1.09353	311.4	1.111133	311.4	1.084412	311.4	1.087661	311.4	-0.156284	311.4	-0.08818618	311.4	-0.1407252	311.4	-0.1110642	311.4	-0.08820397	311.4	-0.1106943	311.4	-0.07261898	311.4	-0.08571003	311.4	-0.1165841
311.6	1.188388	311.6	1.103876	311.6	1.134155	311.6	1.097797	311.6	1.111267	311.6	1.082755	311.6	1.085035	311.6	-0.1535281	311.6	-0.0890293	311.6	-0.1445103	311.6	-0.1111522	311.6	-0.08941121	311.6	-0.1121557	311.6	-0.07578661	311.6	-0.08366533	311.6	-0.1149592
311.8	1.18469	311.8	1.100515	311.8	1.137724	311.8	1.099679	311.8	1.105912	311.8	1.081813	311.8	1.090244	311.8	-0.1537125	311.81	-0.08494449	311.81	-0.1482582	311.81	-0.1132091	311.81	-0.08318384	311.81	-0.1031459	311.81	-0.07306139	311.81	-0.08581524	311.81	-0.1208286
312	1.18454	312	1.104254	312	1.136475	312	1.096913	312	1.109245	312	1.086033	312	1.085648	312	-0.1537551	312	-0.08979916	312	-0.1457482	312	-0.112465	312	-0.08744678	312	-0.1067753	312	-0.07969542	312	-0.0815735	312	-0.1183524
312.2	1.187477	312.2	1.106993	312.2	1.137801	312.2	1.094906	312.2	1.112131	312.2	1.082352	312.2	1.08987	312.2	-0.1558642	312.2	-0.08837786	312.2	-0.1404267	312.2	-0.1149252	312.2	-0.08571736	312.2	-0.1064123	312.2	-0.0776	312.2	-0.0813029	312.2	-0.1137246
312.4	1.184938	312.4	1.10604	312.4	1.137124	312.4	1.101636	312.4	1.109222	312.4	1.086836	312.4	1.089064	312.4	-0.1496551	312.4	-0.08506029	312.4	-0.143497	312.4	-0.1145887	312.4	-0.08527917	312.4	-0.1076391	312.4	-0.07865817	312.4	-0.08382307	312.4	-0.1206333
312.6	1.185264	312.6	1.103145	312.6	1.135325	312.6	1.100361	312.6	1.109428	312.6	1.083905	312.6	1.086634	312.6	-0.1558332	312.6	-0.08325268	312.6	-0.1420633	312.6	-0.1135513	312.6	-0.08658525	312.6	-0.10622	312.6	-0.07173845	312.6	-0.08012281	312.6	-0.1217782
312.8	1.188208	312.8	1.105309	312.8	1.134656	312.8	1.10067	312.8	1.106261	312.8	1.084513	312.8	1.08591	312.8	-0.1532097	312.79	-0.08143003	312.79	-0.1413151	312.79	-0.111203	312.79	-0.08273106	312.79	-0.1061409	312.79	-0.07851238	312.79	-0.08471109	312.79	-0.1196864
313	1.188623	313	1.102398	313	1.135353	313	1.0998	313	1.108898	313	1.086564	313	1.090273	313	-0.1569185	312.99	-0.08336336	312.99	-0.1417618	312.99	-0.1116506	312.99	-0.08324388	312.99	-0.1070301	312.99	-0.07600677	312.99	-0.08602891	312.99	-0.1136151
313.2	1.183781	313.2	1.103813	313.2	1.141932	313.2	1.100731	313.2	1.115586	313.2	1.088691	313.2	1.092803	313.2	-0.1514594	313.19	-0.08496771	313.19	-0.1393642	313.19	-0.1112536	313.19	-0.08655097	313.19	-0.1013092	313.19	-0.07257117	313.19	-0.08367619	313.19	-0.1170613
313.4	1.18453	313.4	1.10408	313.4	1.138492	313.4	1.098864	313.4	1.110752	313.4	1.082423	313.4	1.089704	313.4	-0.152063	313.4	-0.0861391	313.4	-0.1438178	313.4	-0.118066	313.4	-0.08539131	313.4	-0.1078277	313.4	-0.07706635	313.4	-0.0811569	313.4	-0.1210795
[truncated: 17,282 more rows]
