# Supplementary material for: Functional development of a V3/glycan-specific broadly neutralizing antibody isolated from a case of HIV superinfection
Source: eLife journal article supplement (doi:10.7554/elife.68110), 2021-07-15
Supplement: fig2-data2 [file RawData0.xls]

A1		B1		C1		D1		E1		F1		G1		H1		A2		B2		C2		D2		E2		F2		G2		H2
0	0	0	0	0	0	0	0	0	0	0	0	0	0	0	0	0	0	0	0	0	0	0	0	0	0	0	0	0	0	0	0
0.2	-0.00589727	0.2	-0.00294047	0.2	0.00180692	0.2	-0.00023705	0.2	0.00427105	0.2	-0.00302804	0.2	-0.00088172	0.2	-0.00063886	0.2	0.00174743	0.2	-0.00061414	0.2	0.00031795	0.2	0.0027748	0.2	-0.00088803	0.2	0.00327181	0.2	0.0086939	0.2	-0.00237672
0.4	0.00141776	0.4	0.00217149	0.4	0.00162394	0.4	0.0032064	0.4	0.00662971	0.4	0.00402036	0.4	0.00065076	0.4	0.00282867	0.4	0.00026588	0.4	-0.00307801	0.4	-0.00017438	0.4	0.00044627	0.4	0.00075343	0.4	0.00075533	0.4	0.00442769	0.4	0.00303451
0.6	0.00531633	0.6	-0.00266927	0.6	0.00523396	0.6	0.00423263	0.6	0.00566183	0.6	0.00276132	0.6	0.00385583	0.6	0.00285043	0.6	0.00470947	0.6	0.0049996	0.6	0.00609654	0.6	0.00787457	0.6	0.00169891	0.6	0.00341534	0.6	0.00349869	0.6	0.00024812
0.8	0.00586584	0.8	0.0006391	0.8	0.00581782	0.8	0.00369287	0.8	0.0094028	0.8	0.00491867	0.8	0.0072996	0.8	0.002971	0.8	0.00468213	0.8	0.00097989	0.8	0.00326592	0.8	0.00439554	0.8	0.0063634	0.8	0.00652963	0.8	0.00634438	0.8	0.00403718
1	0.00093205	1	0.00306458	1	0.00685519	1	0.00745722	1	0.01105609	1	0.00771126	1	0.00528971	1	0.0065668	1	0.00922446	1	0.00178005	1	0.00859663	1	0.0067087	1	0.00560176	1	0.01036712	1	0.01345509	1	0.00793061
1.2	0.00539455	1.2	0.00981841	1.2	0.00556004	1.2	0.00526623	1.2	0.00883351	1.2	0.00411414	1.2	0.00941586	1.2	0.00209294	1.2	0.00465415	1.2	0.00200356	1.2	0.00545326	1.2	0.00498134	1.2	0.00702786	1.2	0.00718203	1.2	0.0132055	1.2	0.00877662
1.4	0.00605378	1.4	0.00028563	1.4	0.00957922	1.4	0.00465307	1.4	0.01657474	1.4	0.00680446	1.4	0.00749948	1.4	0.00805282	1.4	0.00889936	1.4	0.0018836	1.4	0.00682252	1.4	0.00401925	1.4	0.01097491	1.4	0.00770756	1.4	0.01308199	1.4	0.00694935
1.6	0.00484899	1.6	0.00474238	1.6	0.01105491	1.6	0.01074396	1.6	0.01701448	1.6	0.0093502	1.6	0.01396885	1.6	0.00922859	1.6	0.00802194	1.6	0.00889424	1.6	0.01006685	1.6	0.0077522	1.6	0.01021204	1.6	0.01063934	1.6	0.01178202	1.6	0.00930737
1.8	0.00864151	1.8	0.0022251	1.8	0.01134705	1.8	0.01087043	1.8	0.01225963	1.8	0.00593449	1.8	0.00867425	1.8	0.00919586	1.8	0.00835368	1.8	0.00781425	1.8	0.01229782	1.8	0.0089075	1.8	0.0098227	1.8	0.00755945	1.8	0.01262187	1.8	0.0073946
2	0.00987811	2	0.0068717	2	0.01053428	2	0.01153303	2	0.00636663	2	0.00538088	2	0.00876101	2	0.00813275	2	0.01300138	2	0.01338519	2	0.00984248	2	0.00912335	2	0.01529421	2	0.01144812	2	0.0119973	2	0.01171147
2.2	0.00781021	2.2	0.00436282	2.2	0.01266243	2.2	0.01125023	2.2	0.00962445	2.2	0.01060011	2.2	0.00989917	2.2	0.00809314	2.2	0.01128423	2.2	0.00506062	2.2	0.00825385	2.2	0.00959363	2.2	0.01004976	2.2	0.00994708	2.2	0.01187735	2.2	0.00924506
2.4	0.00786929	2.4	0.0034893	2.4	0.01095771	2.4	0.00946941	2.4	0.01435005	2.4	0.0062185	2.4	0.0154244	2.4	0.00872466	2.4	0.00975803	2.4	0.01006653	2.4	0.01033529	2.4	0.00896939	2.4	0.01103648	2.4	0.01073357	2.4	0.01258297	2.4	0.01000515
2.6	0.00629144	2.6	0.01052508	2.6	0.00888784	2.6	0.01242558	2.6	0.0137866	2.6	0.00984928	2.6	0.01235163	2.6	0.00525329	2.6	0.01264182	2.6	0.00403625	2.6	0.00766586	2.6	0.01113736	2.6	0.01401189	2.6	0.01003025	2.6	0.01180801	2.6	0.00755165
2.8	0.00967428	2.8	0.00932648	2.8	0.01431998	2.8	0.01118119	2.8	0.01311773	2.8	0.01398883	2.8	0.01176787	2.8	0.0115025	2.8	0.01002584	2.8	0.00898002	2.8	0.00797324	2.8	0.00963086	2.8	0.00921451	2.8	0.01239633	2.8	0.01445702	2.8	0.0097738
3	0.01004276	3	0.00519577	3	0.0106682	3	0.01311548	3	0.01059456	3	0.00948253	3	0.00885316	3	0.00960246	3	0.01056787	3	0.00699536	3	0.0115443	3	0.01255127	3	0.01446427	3	0.01054593	3	0.01295601	3	0.01045205
3.2	0.01386587	3.2	0.00653773	3.2	0.0096905	3.2	0.01066127	3.2	0.01123013	3.2	0.00914233	3.2	0.01167539	3.2	0.00960923	3.2	0.01156954	3.2	0.0127909	3.2	0.01335262	3.2	0.00872043	3.2	0.01219452	3.2	0.00912939	3.2	0.01723361	3.2	0.01404198
3.4	0.01096158	3.4	0.00527803	3.4	0.00654603	3.4	0.0082696	3.4	0.01568562	3.4	0.01036754	3.4	0.01385487	3.4	0.00935753	3.4	0.00773257	3.4	0.00421096	3.4	0.01325282	3.4	0.00993839	3.4	0.01232388	3.4	0.0092504	3.4	0.01381839	3.4	0.01222622
3.6	0.01163344	3.6	0.00676609	3.6	0.01291884	3.6	0.01343198	3.6	0.01137571	3.6	0.01092244	3.6	0.01057912	3.6	0.00810804	3.6	0.01424231	3.6	0.00737494	3.6	0.01083408	3.6	0.00774093	3.6	0.01186303	3.6	0.01216771	3.6	0.01948972	3.6	0.01132952
3.8	0.0137566	3.8	0.00659764	3.8	0.01100703	3.8	0.00990332	3.8	0.0141773	3.8	0.01106632	3.8	0.0096037	3.8	0.01156722	3.8	0.01205351	3.8	0.00359812	3.8	0.01440968	3.8	0.01086873	3.8	0.01577364	3.8	0.01168859	3.8	0.01401765	3.8	0.01708597
4	0.01344276	4	0.00849957	4	0.00979043	4	0.01603088	4	0.01634903	4	0.01436216	4	0.01325721	4	0.01158288	4	0.00731988	4	0.00618788	4	0.01370197	4	0.01211392	4	0.01097647	4	0.01052292	4	0.01252983	4	0.01042281
4.2	0.00916285	4.2	0.00429628	4.2	0.0108708	4.2	0.01265872	4.2	0.01244672	4.2	0.01046212	4.2	0.01531723	4.2	0.01231824	4.2	0.01108522	4.2	0.01078881	4.2	0.01373505	4.2	0.00911101	4.2	0.01013188	4.2	0.01228611	4.2	0.01265017	4.2	0.01065608
4.4	0.00853352	4.4	0.00634929	4.4	0.01215111	4.4	0.01608991	4.4	0.01138949	4.4	0.01273113	4.4	0.0101489	4.4	0.01146865	4.4	0.01218038	4.4	0.00788781	4.4	0.01115169	4.4	0.0112548	4.4	0.01430535	4.4	0.00797326	4.4	0.01154777	4.4	0.01103989
4.6	0.01124913	4.6	0.00665515	4.6	0.01408092	4.6	0.01170194	4.6	0.01229078	4.6	0.01356612	4.6	0.01494921	4.6	0.00817514	4.6	0.01539089	4.6	0.00801812	4.6	0.01084158	4.6	0.01175876	4.6	0.01414548	4.6	0.0130901	4.6	0.01645287	4.6	0.00733821
4.8	0.00957955	4.8	0.01603802	4.8	0.01451071	4.8	0.0140421	4.8	0.01458429	4.8	0.01394963	4.8	0.01251569	4.8	0.00991154	4.8	0.01134638	4.8	0.00828909	4.8	0.01416006	4.8	0.01180734	4.8	0.01148623	4.8	0.01681398	4.8	0.01484064	4.8	0.01003009
5	0.01118115	5	0.00699207	5	0.01360111	5	0.01333672	5	0.01288429	5	0.01117682	5	0.01342408	5	0.00923162	5	0.0138935	5	0.0106928	5	0.00832265	5	0.01402459	5	0.01349604	5	0.01320253	5	0.01753313	5	0.00745257
5.2	0.01099137	5.2	0.01139503	5.2	0.01127878	5.2	0.01487137	5.2	0.01452811	5.2	0.01174588	5.2	0.01190463	5.2	0.01198817	5.2	0.01535948	5.2	0.01243156	5.2	0.01232896	5.2	0.0109265	5.2	0.01122231	5.2	0.01427454	5.2	0.02136447	5.2	0.01450295
5.4	0.00737943	5.4	0.00645204	5.4	0.01242931	5.4	0.01235996	5.4	0.01589204	5.4	0.01441541	5.4	0.00728793	5.4	0.01096617	5.4	0.01290194	5.4	0.00793462	5.4	0.01061424	5.4	0.01327084	5.4	0.01289293	5.4	0.01567648	5.4	0.01822269	5.4	0.01500165
5.6	0.00773108	5.6	0.01272407	5.6	0.01202365	5.6	0.01381272	5.6	0.01439863	5.6	0.01265167	5.6	0.01137948	5.6	0.01262878	5.6	0.01240136	5.6	0.00755472	5.6	0.01434889	5.6	0.00970047	5.6	0.01343501	5.6	0.01586034	5.6	0.01874638	5.6	0.0080271
5.8	0.00873275	5.8	0.01019241	5.8	0.01308653	5.8	0.01182987	5.8	0.01684186	5.8	0.01027679	5.8	0.01284707	5.8	0.0102314	5.8	0.00883827	5.8	0.00948377	5.8	0.01465077	5.8	0.01026347	5.8	0.01278965	5.8	0.01676396	5.8	0.02098571	5.8	0.01452568
6	0.01008627	6	0.00742315	6	0.01451904	6	0.01666786	6	0.01609207	6	0.01230248	6	0.01086004	6	0.01393807	6	0.01626206	6	0.00961611	6	0.01528717	6	0.01768378	6	0.01596735	6	0.01128969	6	0.01603982	6	0.01269799
6.2	0.01062143	6.2	0.00570231	6.2	0.01303529	6.2	0.01431653	6.2	0.01305183	6.2	0.01398604	6.2	0.01515271	6.2	0.01287071	6.2	0.01460307	6.2	0.01271238	6.2	0.01506334	6.2	0.01598876	6.2	0.01780934	6.2	0.0132455	6.2	0.02087099	6.2	0.00996948
6.4	0.01272162	6.4	0.00749434	6.4	0.01679468	6.4	0.01357723	6.4	0.01662884	6.4	0.00873461	6.4	0.01610201	6.4	0.01204832	6.4	0.01508553	6.4	0.01047151	6.4	0.0165504	6.4	0.01224851	6.4	0.01638125	6.4	0.01535464	6.4	0.01503955	6.4	0.01496445
6.6	0.00999948	6.6	0.00884333	6.6	0.01684148	6.6	0.01311233	6.6	0.01092412	6.6	0.01130872	6.6	0.01491899	6.6	0.01742044	6.6	0.01289233	6.6	0.00787446	6.6	0.01721937	6.6	0.01148474	6.6	0.01083831	6.6	0.01796331	6.6	0.01967177	6.6	0.01584542
6.8	0.00915653	6.8	0.00867288	6.8	0.01087632	6.8	0.01324125	6.8	0.01582908	6.8	0.0144557	6.8	0.01579982	6.8	0.01314976	6.8	0.01635831	6.8	0.00950773	6.8	0.01587666	6.8	0.01309146	6.8	0.01867544	6.8	0.01246063	6.8	0.0160654	6.8	0.0078973
7	0.01035367	7	0.00984537	7	0.01400761	7	0.01608461	7	0.01639837	7	0.01103557	7	0.01683027	7	0.01548646	7	0.01288703	7	0.01149225	7	0.01985644	7	0.01449539	7	0.01307767	7	0.01344769	7	0.0149291	7	0.00781338
7.2	0.01354304	7.2	0.00655614	7.2	0.00986851	7.2	0.0164451	7.2	0.01751127	7.2	0.01346425	7.2	0.01418683	7.2	0.01145802	7.2	0.01079521	7.2	0.00967119	7.2	0.01402364	7.2	0.01123577	7.2	0.01311839	7.2	0.01361884	7.2	0.01906069	7.2	0.01022155
7.4	0.01032802	7.4	0.00646413	7.4	0.01226015	7.4	0.01628372	7.4	0.01335286	7.4	0.01126144	7.4	0.00897336	7.4	0.01628442	7.4	0.01184008	7.4	0.00802223	7.4	0.01203513	7.4	0.00891073	7.4	0.02061483	7.4	0.01181082	7.4	0.01427633	7.4	0.00452055
7.6	0.01000931	7.6	0.01250043	7.6	0.01539366	7.6	0.01540291	7.6	0.01511235	7.6	0.01375094	7.6	0.0170066	7.6	0.01407727	7.6	0.01394296	7.6	0.01211603	7.6	0.01184834	7.6	0.01139848	7.6	0.01318111	7.6	0.01651109	7.6	0.01638907	7.6	0.00851052
7.8	0.00679158	7.8	0.01111074	7.8	0.01527016	7.8	0.01903868	7.8	0.01459809	7.8	0.01788952	7.8	0.0118499	7.8	0.01449598	7.8	0.01254646	7.8	0.01471397	7.8	0.01728892	7.8	0.01121774	7.8	0.01509698	7.8	0.01683715	7.8	0.0188951	7.8	0.01364501
8	0.01092932	8	0.00975092	8	0.01302616	8	0.01792464	8	0.01630054	8	0.01432496	8	0.01447862	8	0.01205203	8	0.01344316	8	0.01527373	8	0.01626609	8	0.01813624	8	0.01435093	8	0.01406746	8	0.01679614	8	0.00994576
8.2	0.01170863	8.2	0.01159305	8.2	0.01599478	8.2	0.01570183	8.2	0.01462508	8.2	0.01561343	8.2	0.01362215	8.2	0.01005888	8.2	0.01617384	8.2	0.01034625	8.2	0.01379402	8.2	0.01532444	8.2	0.01480091	8.2	0.01123231	8.2	0.02195787	8.2	0.01491525
8.4	0.01054963	8.4	0.00837003	8.4	0.01069988	8.4	0.01531731	8.4	0.01724504	8.4	0.01411296	8.4	0.01901534	8.4	0.00847187	8.4	0.01643064	8.4	0.01476638	8.4	0.01592769	8.4	0.0145041	8.4	0.01900731	8.4	0.01228412	8.4	0.01917684	8.4	0.00771144
8.6	0.00917336	8.6	0.00487652	8.6	0.01381688	8.6	0.01881296	8.6	0.01655279	8.6	0.01605913	8.6	0.01467391	8.6	0.01150492	8.6	0.01182335	8.6	0.01217605	8.6	0.01821866	8.6	0.01394918	8.6	0.0153228	8.6	0.01490768	8.6	0.01909441	8.6	0.01457716
8.8	0.01462365	8.8	0.01318287	8.8	0.01580425	8.8	0.01632732	8.8	0.01181181	8.8	0.01701029	8.8	0.01006818	8.8	0.00934639	8.8	0.01577614	8.8	0.01300957	8.8	0.01468691	8.8	0.01474206	8.8	0.01885653	8.8	0.01597019	8.8	0.02037189	8.8	0.00990371
9	0.00650224	9	0.00463975	9	0.01692585	9	0.01404122	9	0.01366868	9	0.01572558	9	0.01230604	9	0.01183309	9	0.01244607	9	0.01251882	9	0.01767311	9	0.01616907	9	0.01460199	9	0.01387849	9	0.02137864	9	0.01049202
9.2	0.01059481	9.2	0.01054418	9.2	0.01509173	9.2	0.01550027	9.2	0.01439978	9.2	0.01526586	9.2	0.01547537	9.2	0.01545229	9.2	0.01574199	9.2	0.01138304	9.2	0.01511596	9.2	0.0179281	9.2	0.01376569	9.2	0.01669261	9.2	0.01887813	9.2	0.01505747
9.4	0.00938132	9.4	0.01178354	9.4	0.0162613	9.4	0.01634398	9.4	0.01172191	9.4	0.0130998	9.4	0.01375154	9.4	0.01018476	9.4	0.01393496	9.4	0.01183219	9.4	0.01804261	9.4	0.01470549	9.4	0.01869827	9.4	0.01274806	9.4	0.01866538	9.4	0.01273467
9.6	0.01106472	9.6	0.0058156	9.6	0.01651341	9.6	0.01982356	9.6	0.01376981	9.6	0.01267707	9.6	0.01448972	9.6	0.0101577	9.6	0.01170001	9.6	0.01149174	9.6	0.01823863	9.6	0.01487101	9.6	0.0159998	9.6	0.01353325	9.6	0.01840414	9.6	0.01141364
9.8	0.00770112	9.8	0.01002262	9.8	0.01262305	9.8	0.01932686	9.8	0.01674273	9.8	0.01583084	9.8	0.01193823	9.8	0.01376406	9.8	0.01648795	9.8	0.01775479	9.8	0.01469	9.8	0.01133075	9.8	0.01958011	9.8	0.01668736	9.8	0.01854883	9.8	0.01304217
10	0.01514535	10	0.01050532	10	0.01102031	10	0.016622	10	0.01546303	10	0.01504987	10	0.01601763	10	0.00832896	10	0.0111314	10	0.005134	10	0.01519743	10	0.01529524	10	0.01570122	10	0.01375638	10	0.02079432	10	0.01013349
10.2	0.01482795	10.2	0.01115247	10.2	0.01241998	10.2	0.01021334	10.2	0.01637588	10.2	0.01704626	10.2	0.01530163	10.2	0.01260569	10.2	0.01696764	10.2	0.01176615	10.2	0.01588029	10.2	0.01591793	10.2	0.01661833	10.2	0.01721742	10.2	0.01938593	10.2	0.01120127
10.4	0.01087946	10.4	0.01040895	10.4	0.01685601	10.4	0.02033478	10.4	0.01547863	10.4	0.01516044	10.4	0.01428718	10.4	0.01204099	10.4	0.01670101	10.4	0.01390828	10.4	0.0201533	10.4	0.01229115	10.4	0.01641713	10.4	0.01567284	10.4	0.02509867	10.4	0.01317166
10.6	0.01062689	10.6	0.01020891	10.6	0.01485546	10.6	0.01925531	10.6	0.01658708	10.6	0.01300764	10.6	0.0124769	10.6	0.01189301	10.6	0.01811337	10.6	0.01216341	10.6	0.01602807	10.6	0.01424178	10.6	0.01287878	10.6	0.01384545	10.6	0.01400447	10.6	0.01001645
10.8	0.00906879	10.8	0.01029641	10.8	0.014847	10.8	0.01690171	10.8	0.01868009	10.8	0.01712383	10.8	0.01644406	10.8	0.01554258	10.8	0.01490984	10.8	0.01576737	10.8	0.01544288	10.8	0.01540208	10.8	0.01662685	10.8	0.01490449	10.8	0.01955384	10.8	0.00828303
11	0.01001289	11	0.00982316	11	0.01690359	11	0.01507216	11	0.01437594	11	0.017262	11	0.01403777	11	0.01438578	11	0.01074364	11	0.00905791	11	0.017904	11	0.01735569	11	0.01319111	11	0.01943744	11	0.02290275	11	0.01717421
11.2	0.00994033	11.2	0.00950099	11.2	0.01271358	11.2	0.01512965	11.2	0.01552019	11.2	0.01314051	11.2	0.0130792	11.2	0.00943232	11.2	0.01596956	11.2	0.01267689	11.2	0.0177225	11.2	0.01930755	11.2	0.01284951	11.2	0.01541525	11.2	0.02138479	11.2	0.01278534
11.4	0.01211282	11.4	0.01388931	11.4	0.01616648	11.4	0.02061314	11.4	0.01425358	11.4	0.01493144	11.4	0.01351663	11.4	0.01438853	11.4	0.01575433	11.4	0.00986291	11.4	0.01738474	11.4	0.01760035	11.4	0.01928786	11.4	0.01463867	11.4	0.01912622	11.4	0.01548318
11.6	0.01061399	11.6	0.00892665	11.6	0.01800843	11.6	0.01976192	11.6	0.01760615	11.6	0.01443867	11.6	0.01390873	11.6	0.01214538	11.6	0.01596822	11.6	0.01507918	11.6	0.02026416	11.6	0.01957838	11.6	0.01745329	11.6	0.01669913	11.6	0.02170444	11.6	0.00874746
11.8	0.00631178	11.8	0.0094302	11.8	0.01504022	11.8	0.0210489	11.8	0.01422488	11.8	0.01348694	11.8	0.01217877	11.8	0.00623717	11.8	0.01626352	11.8	0.01208243	11.8	0.02089831	11.8	0.01761711	11.8	0.0139918	11.8	0.01741413	11.8	0.02381389	11.8	0.01350138
12	0.01041064	12	0.00996436	12	0.01567338	12	0.01517306	12	0.01836902	12	0.01599183	12	0.0146264	12	0.00963591	12	0.01404558	12	0.01380964	12	0.02258005	12	0.01520985	12	0.01681493	12	0.01523964	12	0.01909531	12	0.01027843
12.2	0.01098296	12.2	0.0077068	12.2	0.01809494	12.2	0.01768952	12.2	0.01629229	12.2	0.01456663	12.2	0.00898464	12.2	0.0071919	12.2	0.01388672	12.2	0.0166744	12.2	0.02061619	12.2	0.01649337	12.2	0.01432305	12.2	0.01508108	12.2	0.02173929	12.2	0.01307674
12.4	0.01311746	12.4	0.01256285	12.4	0.01325076	12.4	0.02187664	12.4	0.01810615	12.4	0.01862761	12.4	0.01941634	12.4	0.00805212	12.4	0.01316425	12.4	0.0114661	12.4	0.02064617	12.4	0.01665239	12.4	0.01494498	12.4	0.01114918	12.4	0.0214748	12.4	0.01087288
12.63	0.00597337	12.63	0.01313867	12.63	0.01536293	12.63	0.01412867	12.63	0.01700621	12.63	0.01781901	12.63	0.01683041	12.63	0.00947334	12.6	0.01784635	12.6	0.00912602	12.6	0.01597879	12.6	0.01195921	12.6	0.01226606	12.6	0.01412556	12.6	0.01964744	12.6	0.01626107
12.8	0.0087195	12.8	0.01192455	12.8	0.01284797	12.8	0.01399394	12.8	0.01755767	12.8	0.01393885	12.8	0.01486676	12.8	0.00986139	12.8	0.01381829	12.8	0.01242427	12.8	0.01562355	12.8	0.01428415	12.8	0.01485538	12.8	0.01098762	12.8	0.02127422	12.8	0.0090643
13	0.01008117	13	0.01288174	13	0.0173645	13	0.01665344	13	0.01428666	13	0.01277807	13	0.01507684	13	0.0115096	13	0.01796725	13	0.0129849	13	0.02041398	13	0.01545777	13	0.0202782	13	0.01314903	13	0.02070341	13	0.01609435
13.2	0.01260677	13.2	0.01070024	13.2	0.01940442	13.2	0.01903383	13.2	0.01563367	13.2	0.01579785	13.2	0.01672021	13.2	0.01743813	13.2	0.01585926	13.2	0.01349107	13.2	0.01937596	13.2	0.01532384	13.2	0.01965513	13.2	0.01582324	13.2	0.0159366	13.2	0.01341671
13.4	0.00554886	13.4	0.00815374	13.4	0.01702581	13.4	0.01868328	13.4	0.01789673	13.4	0.01145113	13.4	0.0217013	13.4	0.0062103	13.4	0.01580781	13.4	0.0133957	13.4	0.01870596	13.4	0.01420155	13.4	0.00933277	13.4	0.01364376	13.4	0.0173495	13.4	0.01501061
13.6	0.00987487	13.6	0.01082503	13.6	0.01342088	13.6	0.01798439	13.6	0.01365131	13.6	0.01186754	13.6	0.01518985	13.6	0.0099224	13.6	0.01547939	13.6	0.01505605	13.6	0.01807777	13.6	0.0152726	13.6	0.01587402	13.6	0.01802638	13.6	0.02022832	13.6	0.01636449
13.8	0.00823271	13.8	0.01121255	13.8	0.01316823	13.8	0.01711464	13.8	0.01553723	13.8	0.01503485	13.8	0.01986777	13.8	0.00678196	13.8	0.01641542	13.8	0.01047571	13.8	0.01747677	13.8	0.01459444	13.8	0.01818331	13.8	0.01548786	13.8	0.0257814	13.8	0.00769856
14	0.01160776	14	0.01266782	14	0.01800795	14	0.01771983	14	0.01649559	14	0.01427861	14	0.01384271	14	0.01372072	14	0.01352073	14	0.0124874	14	0.01768225	14	0.01755618	14	0.01657964	14	0.01395702	14	0.02270773	14	0.01488194
14.2	0.01116226	14.2	0.00764504	14.2	0.01568961	14.2	0.01789252	14.2	0.01139089	14.2	0.01256319	14.2	0.01624379	14.2	0.01106653	14.21	0.0125949	14.21	0.0128868	14.21	0.02099217	14.21	0.01818982	14.21	0.0188293	14.21	0.01849747	14.21	0.01776154	14.21	0.01256972
14.4	0.00849048	14.4	0.0092145	14.4	0.01648986	14.4	0.01835704	14.4	0.01275333	14.4	0.01480612	14.4	0.01531756	14.4	0.01149062	14.4	0.01847201	14.4	0.01257684	14.4	0.01863939	14.4	0.01380055	14.4	0.01604948	14.4	0.01622077	14.4	0.0214768	14.4	0.01183088
14.6	0.00878047	14.6	0.01312394	14.6	0.01336919	14.6	0.01560022	14.6	0.01528496	14.6	0.01430614	14.6	0.011613	14.6	0.01473756	14.6	0.01967298	14.6	0.01022823	14.6	0.01654972	14.6	0.01400087	14.6	0.01493484	14.6	0.0169227	14.6	0.02554934	14.6	0.00941918
14.8	0.01119549	14.8	0.01124189	14.8	0.01570725	14.8	0.0182041	14.8	0.01645423	14.8	0.01522509	14.8	0.0137889	14.8	0.00842482	14.8	0.01295036	14.8	0.01542887	14.8	0.01845759	14.8	0.01794576	14.8	0.01358882	14.8	0.01607494	14.8	0.01836156	14.8	0.0127416
15	0.01121679	15	0.00872789	15	0.01355043	15	0.0225544	15	0.01338537	15	0.01792875	15	0.01295866	15	0.01229565	15	0.01036681	15	0.01673795	15	0.02111596	15	0.01701063	15	0.01581006	15	0.02004578	15	0.01889174	15	0.01077936
15.2	0.01254122	15.2	0.01007943	15.2	0.01410959	15.2	0.01534511	15.2	0.01592236	15.2	0.01717241	15.2	0.01619608	15.2	0.01301923	15.2	0.0188305	15.2	0.01302783	15.2	0.0208807	15.2	0.01763433	15.2	0.0162501	15.2	0.01665955	15.2	0.01952651	15.2	0.01194568
15.4	0.01221845	15.4	0.00840516	15.4	0.01493751	15.4	0.01975704	15.4	0.01707757	15.4	0.01325136	15.4	0.01164382	15.4	0.00486455	15.4	0.01320896	15.4	0.01820737	15.4	0.01783306	15.4	0.01817393	15.4	0.01219788	15.4	0.01645218	15.4	0.02197614	15.4	0.00874901
15.6	0.00773635	15.6	0.01179658	15.6	0.0157885	15.6	0.02235041	15.6	0.01784626	15.6	0.01785998	15.6	0.00975077	15.6	0.01005422	15.6	0.01844625	15.6	0.01161282	15.6	0.02024839	15.6	0.01461208	15.6	0.01579535	15.6	0.01560024	15.6	0.01991724	15.6	0.01478132
15.8	0.01038736	15.8	0.00751327	15.8	0.01546248	15.8	0.01854976	15.8	0.01593524	15.8	0.01636441	15.8	0.01586095	15.8	0.0088058	15.8	0.01435922	15.8	0.01642555	15.8	0.02172343	15.8	0.01751841	15.8	0.0185171	15.8	0.01594667	15.8	0.01944186	15.8	0.01254817
16	0.00931782	16	0.01084696	16	0.0116982	16	0.01819114	16	0.01871978	16	0.02153148	16	0.01726666	16	0.01258889	16	0.01845776	16	0.01209379	16	0.02019556	16	0.01499537	16	0.01764669	16	0.01973146	16	0.02749003	16	0.00859384
16.2	0.0120227	16.2	0.0098051	16.2	0.01346001	16.2	0.01803731	16.2	0.01159707	16.2	0.01813213	16.2	0.01635878	16.2	0.01091178	16.2	0.01729999	16.2	0.01101675	16.2	0.01889438	16.2	0.01832279	16.2	0.01877424	16.2	0.01560567	16.2	0.02065912	16.2	0.01501223
16.4	0.01293411	16.4	0.006581	16.4	0.01287079	16.4	0.02095545	16.4	0.01171455	16.4	0.01630479	16.4	0.01133379	16.4	0.01349988	16.4	0.01562413	16.4	0.01308135	16.4	0.01725367	16.4	0.01741685	16.4	0.01284521	16.4	0.01639456	16.4	0.01990161	16.4	0.01821085
16.6	0.01035835	16.6	0.01444095	16.6	0.0189705	16.6	0.01610241	16.6	0.01566314	16.6	0.01318211	16.6	0.01705818	16.6	0.01171508	16.6	0.01102267	16.6	0.01395178	16.6	0.02201828	16.6	0.01535553	16.6	0.01970096	16.6	0.01345158	16.6	0.02469127	16.6	0.01648274
16.8	0.01308333	16.8	0.0129481	16.8	0.01616194	16.8	0.01748365	16.8	0.0152982	16.8	0.01348614	16.8	0.01523238	16.8	0.01168355	16.8	0.0179742	16.8	0.01382871	16.8	0.02014419	16.8	0.01755742	16.8	0.01469232	16.8	0.01897451	16.8	0.01959855	16.8	0.01225352
17	0.01272606	17	0.01092364	17	0.01337363	17	0.01917765	17	0.01504092	17	0.01682114	17	0.01647113	17	0.01126515	17	0.0173019	17	0.01421205	17	0.02280988	17	0.01677723	17	0.01698896	17	0.01445301	17	0.01867044	17	0.0176135
17.2	0.01106913	17.2	0.00728009	17.2	0.01282969	17.2	0.01803187	17.2	0.02049079	17.2	0.01522588	17.2	0.01346486	17.2	0.01512932	17.2	0.0170951	17.2	0.01230004	17.2	0.02179128	17.2	0.01873967	17.2	0.0177338	17.2	0.01517784	17.2	0.02353566	17.2	0.01524141
17.4	0.01304125	17.4	0.01238864	17.4	0.01742576	17.4	0.01700188	17.4	0.01493787	17.4	0.01322735	17.4	0.01887842	17.4	0.01241055	17.4	0.02026623	17.4	0.0162606	17.4	0.0161975	17.4	0.01428926	17.4	0.02031849	17.4	0.01903249	17.4	0.01975205	17.4	0.01715149
17.6	0.01349462	17.6	0.01226796	17.6	0.01249555	17.6	0.01988993	17.6	0.01788977	17.6	0.01305852	17.6	0.01149065	17.6	0.01110559	17.6	0.01501128	17.6	0.01013057	17.6	0.01729806	17.6	0.02028499	17.6	0.0156725	17.6	0.016942	17.6	0.02057718	17.6	0.01387429
17.8	0.01017749	17.8	0.00951827	17.8	0.01672114	17.8	0.02029685	17.8	0.01694106	17.8	0.01653001	17.8	0.00951909	17.8	0.01179427	17.8	0.01763555	17.8	0.01417909	17.8	0.02232384	17.8	0.02037865	17.8	0.01528516	17.8	0.01715673	17.8	0.02079932	17.8	0.00663806
18	0.01337478	18	0.01592348	18	0.01638552	18	0.0206542	18	0.01375625	18	0.01553388	18	0.01463651	18	0.00885194	18	0.01751883	18	0.01279364	18	0.01726912	18	0.01945793	18	0.01951472	18	0.02032736	18	0.02290771	18	0.01148457
18.2	0.01167381	18.2	0.01172007	18.2	0.01566982	18.2	0.02061733	18.2	0.01942733	18.2	0.01486224	18.2	0.01038464	18.2	0.00783772	18.2	0.0175466	18.2	0.00824348	18.2	0.0181162	18.2	0.01551586	18.2	0.01775522	18.2	0.01808196	18.2	0.01845063	18.2	0.01495101
18.4	0.00744112	18.4	0.01063211	18.4	0.01286865	18.4	0.02264008	18.4	0.01461628	18.4	0.01252972	18.4	0.01321925	18.4	0.00846159	18.4	0.01615854	18.4	0.01549559	18.4	0.02246307	18.4	0.01723069	18.4	0.01391601	18.4	0.01540868	18.4	0.02311214	18.4	0.01240504
18.6	0.00826928	18.6	0.012037	18.6	0.01091123	18.6	0.02156935	18.6	0.0178557	18.6	0.01611238	18.6	0.01051788	18.6	0.00670653	18.6	0.01355856	18.6	0.01168671	18.6	0.01766235	18.6	0.01344425	18.6	0.01511217	18.6	0.01876182	18.6	0.02059092	18.6	0.00851824
18.8	0.01093953	18.8	0.00948852	18.8	0.01510697	18.8	0.02236493	18.8	0.01777903	18.8	0.01690115	18.8	0.01356029	18.8	0.00783539	18.8	0.02054837	18.8	0.01273528	18.8	0.01811924	18.8	0.01937478	18.8	0.01882951	18.8	0.01901765	18.8	0.02217548	18.8	0.01889603
19	0.00852899	19	0.00851322	19	0.02128731	19	0.02483362	19	0.01018117	19	0.01415076	19	0.01510245	19	0.01294644	19	0.01632451	19	0.01127368	19	0.0224107	19	0.01904401	19	0.01617183	19	0.01901742	19	0.02041594	19	0.0124434
19.2	0.00877228	19.2	0.010629	19.2	0.01468232	19.2	0.01695253	19.2	0.01120556	19.2	0.0189078	19.2	0.01450519	19.2	0.010654	19.2	0.01663657	19.2	0.01612306	19.2	0.02674944	19.2	0.01513433	19.2	0.01534617	19.2	0.01548142	19.2	0.02813851	19.2	0.01193611
19.4	0.00767349	19.4	0.0100003	19.4	0.01749146	19.4	0.01761546	19.4	0.01291783	19.4	0.0160562	19.4	0.01593751	19.4	0.01652488	19.4	0.01767682	19.4	0.01124009	19.4	0.02092468	19.4	0.01500674	19.4	0.01424734	19.4	0.01558904	19.4	0.02381797	19.4	0.01549415
19.6	0.00888056	19.6	0.00650893	19.6	0.0116868	19.6	0.02109486	19.6	0.01857685	19.6	0.0176278	19.6	0.01494889	19.6	0.01098973	19.6	0.01683224	19.6	0.01397956	19.6	0.01941347	19.6	0.01887589	19.6	0.01839671	19.6	0.0125827	19.6	0.02631833	19.6	0.01404514
19.8	0.01239726	19.8	0.00992484	19.8	0.01611186	19.8	0.01908468	19.8	0.0186717	19.8	0.01708639	19.8	0.01465933	19.8	0.00847161	19.8	0.0156827	19.8	0.01608285	19.8	0.02122229	19.8	0.01226234	19.8	0.02104141	19.8	0.01396454	19.8	0.02476938	19.8	0.01109134
20	0.00909446	20	0.00790039	20	0.01462627	20	0.01924856	20	0.01702039	20	0.0123831	20	0.01200301	20	0.01026485	20	0.01548604	20	0.01590577	20	0.02241054	20	0.01667888	20	0.01761943	20	0.01694968	20	0.02296995	20	0.01333765
20.2	0.00950873	20.2	0.00938751	20.2	0.01196414	20.2	0.01665769	20.2	0.01528046	20.2	0.01413992	20.2	0.010338	20.2	0.00994623	20.2	0.01301775	20.2	0.0124936	20.2	0.01616168	20.2	0.01230704	20.2	0.02009631	20.2	0.01863855	20.2	0.02776081	20.2	0.01182026
20.4	0.01013025	20.4	0.01165607	20.4	0.0144187	20.4	0.01733841	20.4	0.01368141	20.4	0.01893373	20.4	0.01325932	20.4	0.01130523	20.4	0.01590018	20.4	0.01495562	20.4	0.01858667	20.4	0.013829	20.4	0.01786353	20.4	0.01809601	20.4	0.02473938	20.4	0.01384906
20.6	0.01214549	20.6	0.0144761	20.6	0.01531006	20.6	0.01969131	20.6	0.0111248	20.6	0.019052	20.6	0.01512076	20.6	0.00897287	20.6	0.01515296	20.6	0.01598025	20.6	0.02182985	20.6	0.01767816	20.6	0.0173816	20.6	0.02108371	20.6	0.0232325	20.6	0.01455168
20.8	0.00776044	20.8	0.01187418	20.8	0.01632845	20.8	0.01691857	20.8	0.01643156	20.8	0.01570757	20.8	0.01976414	20.8	0.01178832	20.8	0.02088379	20.8	0.01491894	20.8	0.02067386	20.8	0.0136337	20.8	0.01529525	20.8	0.01366367	20.8	0.02033072	20.8	0.01656725
21	0.0096125	21	0.01017443	21	0.0131786	21	0.01763934	21	0.01326318	21	0.02088397	21	0.01450599	21	0.00811492	21	0.01763183	21	0.01314857	21	0.01671879	21	0.01231637	21	0.01686457	21	0.01779445	21	0.02030472	21	0.01202206
21.2	0.0098036	21.2	0.01303139	21.2	0.01548322	21.2	0.02022936	21.2	0.01857896	21.2	0.01841027	21.2	0.0127167	21.2	0.01045839	21.2	0.01634759	21.2	0.01603756	21.2	0.02224595	21.2	0.02058156	21.2	0.01899869	21.2	0.0143913	21.2	0.02292311	21.2	0.01521466
21.4	0.00815107	21.4	0.01085571	21.4	0.0104637	21.4	0.02054576	21.4	0.01493237	21.4	0.01594498	21.4	0.0167643	21.4	0.0152681	21.4	0.01489281	21.4	0.01220112	21.4	0.02178959	21.4	0.01744686	21.4	0.01826444	21.4	0.0185259	21.4	0.02439033	21.4	0.01080719
21.6	0.00888047	21.6	0.00891058	21.6	0.01346748	21.6	0.02242308	21.6	0.01220493	21.6	0.01695384	21.6	0.00842364	21.6	0.01213795	21.6	0.01254577	21.6	0.01302409	21.6	0.01916394	21.6	0.01403204	21.6	0.01556865	21.6	0.0153452	21.6	0.01814061	21.6	0.01557837
21.8	0.01517931	21.8	0.00766393	21.8	0.01469497	21.8	0.02321572	21.8	0.01377853	21.8	0.01485608	21.8	0.01161073	21.8	0.00689426	21.8	0.0151682	21.8	0.01284655	21.8	0.0168802	21.8	0.01471009	21.8	0.01331242	21.8	0.01554806	21.8	0.0229548	21.8	0.0115793
22	0.01006935	22	0.01150386	22	0.01699198	22	0.01843725	22	0.01156696	22	0.01166743	22	0.01593241	22	0.00615704	22	0.01690297	22	0.01817974	22	0.01987323	22	0.01941853	22	0.01704299	22	0.01867554	22	0.02331307	22	0.01338968
22.2	0.00954303	22.2	0.01613814	22.2	0.01429869	22.2	0.01492788	22.2	0.01564004	22.2	0.01754964	22.2	0.01223165	22.2	0.01337884	22.2	0.01656735	22.2	0.01391539	22.2	0.02480635	22.2	0.01838296	22.2	0.0169961	22.2	0.01627282	22.2	0.02119903	22.2	0.0089533
22.4	0.00868059	22.4	0.00811943	22.4	0.01507598	22.4	0.01619785	22.4	0.01365339	22.4	0.01443322	22.4	0.01129486	22.4	0.01306197	22.4	0.01708222	22.4	0.01174973	22.4	0.01933687	22.4	0.01764241	22.4	0.01816722	22.4	0.01885315	22.4	0.01809151	22.4	0.01210052
22.6	0.01119457	22.6	0.01315198	22.6	0.01514533	22.6	0.01828063	22.6	0.0140959	22.6	0.01608678	22.6	0.01477348	22.6	0.01024311	22.6	0.01599936	22.6	0.01624164	22.6	0.01618562	22.6	0.01890462	22.6	0.01526786	22.6	0.0197372	22.6	0.02216176	22.6	0.01474726
22.8	0.01079611	22.8	0.01239691	22.8	0.01825744	22.8	0.01575882	22.8	0.01289645	22.8	0.01786912	22.8	0.0161686	22.8	0.01129292	22.8	0.01309402	22.8	0.01624445	22.8	0.01444864	22.8	0.01790756	22.8	0.01774286	22.8	0.01978222	22.8	0.02145058	22.8	0.01210323
23	0.01380013	23	0.00722519	23	0.0203406	23	0.01902918	23	0.01326514	23	0.01447607	23	0.01325381	23	0.01130496	23	0.01579936	23	0.01860361	23	0.01733139	23	0.01460565	23	0.01768454	23	0.01645206	23	0.0219323	23	0.01157295
23.2	0.01022581	23.2	0.0105684	23.2	0.01645955	23.2	0.01962206	23.2	0.0116678	23.2	0.01469046	23.2	0.01419956	23.2	0.00996501	23.2	0.01913098	23.2	0.01231354	23.2	0.01945018	23.2	0.02009174	23.2	0.01661596	23.2	0.02032522	23.2	0.02296338	23.2	0.01379163
23.4	0.01120675	23.4	0.00905799	23.4	0.01073435	23.4	0.01618934	23.4	0.01263859	23.4	0.01718207	23.4	0.01436791	23.4	0.0141298	23.4	0.01342162	23.4	0.01681326	23.4	0.01984486	23.4	0.02023617	23.4	0.01721345	23.4	0.02088338	23.4	0.02478571	23.4	0.01366873
23.6	0.00902147	23.6	0.01213627	23.6	0.01509381	23.6	0.02129265	23.6	0.01582559	23.6	0.01683314	23.6	0.01286486	23.6	0.00602937	23.6	0.01715713	23.6	0.01757788	23.6	0.01848376	23.6	0.02094993	23.6	0.01468018	23.6	0.01810244	23.6	0.02362042	23.6	0.01707874
23.8	0.01152409	23.8	0.01047845	23.8	0.0151698	23.8	0.01777237	23.8	0.01476807	23.8	0.0184042	23.8	0.01521816	23.8	0.01671745	23.8	0.01777196	23.8	0.01709353	23.8	0.02210251	23.8	0.01745788	23.8	0.01872039	23.8	0.01548671	23.8	0.02425649	23.8	0.01307065
24	0.00436906	24	0.00775921	24	0.011363	24	0.01884093	24	0.01049656	24	0.01835114	24	0.01667333	24	0.00932524	24	0.01354097	24	0.01344214	24	0.01926843	24	0.01688094	24	0.01992376	24	0.01872132	24	0.02612661	24	0.01793623
24.2	0.00908139	24.2	0.01303027	24.2	0.01677546	24.2	0.02036114	24.2	0.01248659	24.2	0.02235656	24.2	0.01475454	24.2	0.00948049	24.2	0.01257446	24.2	0.01655218	24.2	0.02570882	24.2	0.01758515	24.2	0.01706423	24.2	0.01557586	24.2	0.02336692	24.2	0.00947665
24.4	0.00790413	24.4	0.01007854	24.4	0.0167022	24.4	0.02087685	24.4	0.02057972	24.4	0.01947028	24.4	0.01365854	24.4	0.01402794	24.4	0.01814538	24.4	0.01331544	24.4	0.02267407	24.4	0.01933498	24.4	0.01916122	24.4	0.01692657	24.4	0.02003322	24.4	0.01190612
24.6	0.01206519	24.6	0.01042326	24.6	0.01365112	24.6	0.02100448	24.6	0.0135343	24.6	0.01348708	24.6	0.01288282	24.6	0.01212744	24.6	0.01689167	24.6	0.01459833	24.6	0.02085277	24.6	0.0202062	24.6	0.01629996	24.6	0.01772589	24.6	0.02308674	24.6	0.01211323
24.8	0.0069383	24.8	0.01089616	24.8	0.01656824	24.8	0.02290168	24.8	0.01182092	24.8	0.02094263	24.8	0.01539932	24.8	0.0090177	24.8	0.02089432	24.8	0.01224189	24.8	0.02162743	24.8	0.01923134	24.8	0.01675003	24.8	0.01708872	24.8	0.0217381	24.8	0.010853
25	0.00998129	25	0.01471477	25	0.01271292	25	0.0210914	25	0.01649693	25	0.01990998	25	0.01193044	25	0.00894859	25	0.01998652	25	0.0144123	25	0.02340018	25	0.01762959	25	0.01912403	25	0.01674146	25	0.0202526	25	0.01348265
25.2	0.01401084	25.2	0.0100352	25.2	0.01709671	25.2	0.02200459	25.2	0.01283448	25.2	0.01596066	25.2	0.0119083	25.2	0.01422496	25.2	0.01699545	25.2	0.01344321	25.2	0.01803982	25.2	0.01437265	25.2	0.02022777	25.2	0.01907467	25.2	0.02035466	25.2	0.01303336
25.4	0.01047797	25.4	0.0089736	25.4	0.01495648	25.4	0.02108811	25.4	0.01359918	25.4	0.01681531	25.4	0.01428902	25.4	0.0091079	25.4	0.01508067	25.4	0.01822922	25.4	0.02193447	25.4	0.01707733	25.4	0.0139848	25.4	0.01722726	25.4	0.02253599	25.4	0.01405699
25.6	0.0125875	25.6	0.00771425	25.6	0.01629163	25.6	0.01838633	25.6	0.01671098	25.6	0.0168858	25.6	0.0098844	25.6	0.01250074	25.6	0.01511389	25.6	0.01208789	25.6	0.01954596	25.6	0.01668634	25.6	0.01909676	25.6	0.01915351	25.6	0.01720929	25.6	0.01757423
25.8	0.00866259	25.8	0.01103777	25.8	0.01424912	25.8	0.01898184	25.8	0.01372746	25.8	0.01624176	25.8	0.01486127	25.8	0.0109811	25.8	0.01598326	25.8	0.01225743	25.8	0.01974037	25.8	0.01761791	25.8	0.01963557	25.8	0.01925266	25.8	0.02768061	25.8	0.01681001
26	0.0105659	26	0.00916802	26	0.01198132	26	0.02178851	26	0.01372985	26	0.01529144	26	0.01531455	26	0.00585033	26	0.01399632	26	0.01686061	26	0.02157329	26	0.01462358	26	0.01876742	26	0.01733521	26	0.02319139	26	0.01498529
26.2	0.01124573	26.2	0.01306745	26.2	0.01635051	26.2	0.02095352	26.2	0.01193506	26.2	0.01879605	26.2	0.01628028	26.2	0.00887201	26.2	0.01743723	26.2	0.01563128	26.2	0.01688618	26.2	0.01507949	26.2	0.01778251	26.2	0.01917038	26.2	0.02464949	26.2	0.01631177
26.4	0.01026236	26.4	0.00664371	26.4	0.01733292	26.4	0.02204967	26.4	0.01299511	26.4	0.02063712	26.4	0.01459458	26.4	0.01498544	26.4	0.01869995	26.4	0.01135101	26.4	0.01864523	26.4	0.01518598	26.4	0.01845982	26.4	0.02185675	26.4	0.02454667	26.4	0.01146856
26.6	0.00816779	26.6	0.01027656	26.6	0.01140224	26.6	0.01982725	26.6	0.01076479	26.6	0.01902846	26.6	0.01013006	26.6	0.01231903	26.6	0.01213216	26.6	0.01578202	26.6	0.021433	26.6	0.01909532	26.6	0.01732037	26.6	0.0197054	26.6	0.02237528	26.6	0.01513871
26.8	0.01141988	26.8	0.01130102	26.8	0.01456222	26.8	0.0162694	26.8	0.01485086	26.8	0.01372267	26.8	0.01147356	26.8	0.01015142	26.8	0.01639819	26.8	0.01163201	26.8	0.02481262	26.8	0.01672536	26.8	0.01993676	26.8	0.01524954	26.8	0.02208435	26.8	0.00965361
27	0.00967847	27	0.00529489	27	0.01612792	27	0.02026514	27	0.01413069	27	0.01514198	27	0.0144138	27	0.00218321	27.01	0.01834145	27.01	0.01358432	27.01	0.01609219	27.01	0.0241335	27.01	0.01464194	27.01	0.01739747	27.01	0.02008624	27.01	0.0115808
27.2	0.00706968	27.2	0.01034698	27.2	0.01468526	27.2	0.02177623	27.2	0.0108584	27.2	0.01737517	27.2	0.01671023	27.2	0.00863586	27.2	0.01685617	27.2	0.01752787	27.2	0.01910123	27.2	0.02126068	27.2	0.01534092	27.2	0.01781773	27.2	0.02488905	27.2	0.01156301
27.4	0.00900689	27.4	0.00818953	27.4	0.01681791	27.4	0.0166485	27.4	0.01460975	27.4	0.01841355	27.4	0.01184868	27.4	0.00841342	27.4	0.01460727	27.4	0.01411372	27.4	0.01740201	27.4	0.01857816	27.4	0.01608538	27.4	0.02317223	27.4	0.02449593	27.4	0.0141567
27.6	0.01313436	27.6	0.0148578	27.6	0.01642836	27.6	0.02008013	27.6	0.01428774	27.6	0.01624391	27.6	0.01308549	27.6	0.01014768	27.6	0.01458163	27.6	0.00688068	27.6	0.01942025	27.6	0.01354745	27.6	0.0210364	27.6	0.01425489	27.6	0.0198159	27.6	0.01786129
27.8	0.00938572	27.8	0.00757588	27.8	0.016996	27.8	0.02042256	27.8	0.01425278	27.8	0.01630151	27.8	0.01481568	27.8	0.01137884	27.8	0.01398469	27.8	0.01190058	27.8	0.01664952	27.8	0.01514107	27.8	0.01977081	27.8	0.02190452	27.8	0.02511998	27.8	0.01170511
28	0.00808998	28	0.01154037	28	0.01195371	28	0.01897179	28	0.01128773	28	0.01581268	28	0.01108064	28	0.01105236	28	0.01452178	28	0.01980652	28	0.01759959	28	0.01986201	28	0.01642355	28	0.01839574	28	0.02562228	28	0.01256602
28.2	0.0112051	28.2	0.00919723	28.2	0.00992344	28.2	0.01962518	28.2	0.01576198	28.2	0.01285892	28.2	0.01217092	28.2	0.00670555	28.2	0.01727668	28.2	0.01308009	28.2	0.01991371	28.2	0.02381823	28.2	0.0169825	28.2	0.01684838	28.2	0.02040342	28.2	0.01330757
28.4	0.00792665	28.4	0.01024382	28.4	0.01579865	28.4	0.02313566	28.4	0.01155555	28.4	0.01352107	28.4	0.01413104	28.4	0.00790926	28.4	0.01209428	28.4	0.01289059	28.4	0.01815869	28.4	0.01675193	28.4	0.0186374	28.4	0.02024139	28.4	0.02382465	28.4	0.01324327
28.6	0.00957756	28.6	0.01584957	28.6	0.01729304	28.6	0.0222884	28.6	0.01147148	28.6	0.0170651	28.6	0.01597773	28.6	0.00810137	28.6	0.02275718	28.6	0.01352448	28.6	0.02282261	28.6	0.02051081	28.6	0.02015865	28.6	0.01832059	28.6	0.02063238	28.6	0.01086973
28.8	0.01086781	28.8	0.00831709	28.8	0.0141421	28.8	0.01979861	28.8	0.01743331	28.8	0.01666285	28.8	0.01408584	28.8	0.00725251	28.8	0.01293599	28.8	0.01525223	28.8	0.02309365	28.8	0.02068673	28.8	0.01573416	28.8	0.01600286	28.8	0.02646361	28.8	0.01314812
29	0.00927028	29	0.01109378	29	0.01313425	29	0.02020145	29	0.01601531	29	0.01462165	29	0.0174902	29	0.00829517	29	0.01491264	29	0.01302821	29	0.02257534	29	0.01659857	29	0.01773712	29	0.02088702	29	0.02144306	29	0.01735621
29.2	0.01042173	29.2	0.00972329	29.2	0.01529366	29.2	0.02179368	29.2	0.01243289	29.2	0.01818795	29.2	0.0123849	29.2	0.00991414	29.2	0.01441664	29.2	0.0158247	29.2	0.01752585	29.2	0.01808348	29.2	0.02512961	29.2	0.01643111	29.2	0.02133441	29.2	0.01283173
29.4	0.01046847	29.4	0.00661165	29.4	0.01341116	29.4	0.01910695	29.4	0.00942795	29.4	0.01733904	29.4	0.01378831	29.4	0.00810958	29.4	0.01812387	29.4	0.01454917	29.4	0.02750351	29.4	0.01800498	29.4	0.01760404	29.4	0.01646736	29.4	0.02237244	29.4	0.01224598
29.6	0.01202117	29.6	0.01365658	29.6	0.01374706	29.6	0.01977966	29.6	0.01514285	29.6	0.02032336	29.6	0.01166532	29.6	0.01273505	29.6	0.01883217	29.6	0.01728258	29.6	0.02199774	29.6	0.02020325	29.6	0.02064789	29.6	0.02014314	29.6	0.01794465	29.6	0.01244911
29.8	0.00879588	29.8	0.01074289	29.8	0.01353899	29.8	0.02159679	29.8	0.01340772	29.8	0.01702193	29.8	0.01104439	29.8	0.0097133	29.8	0.01638186	29.8	0.01725069	29.8	0.02241185	29.8	0.01664362	29.8	0.01456399	29.8	0.020302	29.8	0.02478067	29.8	0.01539728
30	-4.512355	30	-4.553494	30	-4.633349	30	-4.52388	30	-4.430553	30	-4.53214	30	-4.507053	30	-4.302373	30	-4.221577	30	-4.183211	30	-4.232177	30	-4.077389	30	-4.046603	30	-4.11138	30	-4.054653	30	-4.028567
30.2	-4.785906	30.2	-4.864507	30.2	-4.927938	30.2	-4.801785	30.2	-4.759927	30.2	-4.853616	30.2	-4.79872	30.2	-4.634235	30.2	-4.529572	30.2	-4.579028	30.2	-4.602019	30.2	-4.456877	30.2	-4.439113	30.2	-4.501349	30.2	-4.458727	30.2	-4.399639
30.4	-4.957758	30.4	-5.058653	30.4	-5.103913	30.4	-4.984454	30.4	-4.946713	30.4	-5.039492	30.4	-4.983765	30.4	-4.831538	30.4	-4.706347	30.4	-4.795799	30.4	-4.808367	30.4	-4.66716	30.4	-4.643174	30.4	-4.700995	30.4	-4.655725	30.4	-4.598343
30.6	-5.086657	30.6	-5.201447	30.6	-5.231569	30.6	-5.103694	30.6	-5.08783	30.6	-5.17391	30.6	-5.113941	30.6	-4.96369	30.6	-4.824228	30.6	-4.939621	30.6	-4.941898	30.6	-4.811412	30.6	-4.784388	30.6	-4.843331	30.6	-4.798716	30.6	-4.730237
30.8	-5.174119	30.8	-5.29838	30.8	-5.331371	30.8	-5.197573	30.8	-5.187414	30.8	-5.267786	30.8	-5.223407	30.8	-5.066802	30.8	-4.921406	30.8	-5.040877	30.8	-5.037502	30.8	-4.914677	30.8	-4.885916	30.8	-4.945495	30.8	-4.89762	30.8	-4.829361
31	-5.259108	31	-5.383964	31	-5.408888	31	-5.275568	31	-5.266008	31	-5.357047	31	-5.302433	31	-5.150739	31	-4.998942	31	-5.127407	31	-5.12579	31	-4.988495	31	-4.971182	31	-5.023369	31	-4.98489	31	-4.91105
31.2	-5.321761	31.2	-5.454926	31.2	-5.472585	31.2	-5.338228	31.2	-5.339715	31.2	-5.421908	31.2	-5.365788	31.2	-5.217449	31.2	-5.057599	31.2	-5.195407	31.2	-5.192191	31.2	-5.065022	31.2	-5.0345	31.2	-5.091878	31.2	-5.051974	31.2	-4.978728
31.4	-5.381828	31.4	-5.510316	31.4	-5.525524	31.4	-5.398342	31.4	-5.393325	31.4	-5.480465	31.4	-5.425919	31.4	-5.279499	31.4	-5.116459	31.4	-5.256614	31.4	-5.249107	31.4	-5.119446	31.4	-5.092729	31.4	-5.154527	31.4	-5.113791	31.4	-5.036089
31.6	-5.426296	31.6	-5.560148	31.6	-5.577752	31.6	-5.443267	31.6	-5.444086	31.6	-5.528939	31.6	-5.470107	31.6	-5.325	31.6	-5.163604	31.6	-5.305994	31.6	-5.300327	31.6	-5.170778	31.6	-5.143467	31.6	-5.202664	31.6	-5.16447	31.6	-5.083774
31.8	-5.47059	31.8	-5.603132	31.8	-5.621461	31.8	-5.486073	31.8	-5.48433	31.8	-5.577748	31.8	-5.526109	31.8	-5.373671	31.8	-5.205401	31.8	-5.340203	31.8	-5.344876	31.8	-5.21839	31.8	-5.188172	31.8	-5.247113	31.8	-5.204833	31.8	-5.124465
32	-5.506771	32	-5.63965	32	-5.653181	32	-5.525331	32	-5.5294	32	-5.60942	32	-5.558016	32	-5.409852	32	-5.244018	32	-5.385693	32	-5.382751	32	-5.252422	32	-5.230263	32	-5.286688	32	-5.244302	32	-5.169941
32.2	-5.542466	32.2	-5.678573	32.2	-5.694414	32.2	-5.561	32.2	-5.565112	32.2	-5.647332	32.2	-5.596259	32.2	-5.446729	32.2	-5.277116	32.2	-5.418617	32.2	-5.41855	32.2	-5.288146	32.2	-5.262354	32.2	-5.323075	32.2	-5.278401	32.2	-5.199074
32.4	-5.574877	32.4	-5.712321	32.4	-5.723154	32.4	-5.589309	32.4	-5.592556	32.4	-5.680278	32.4	-5.624671	32.4	-5.481765	32.4	-5.309542	32.4	-5.448544	32.4	-5.449252	32.4	-5.317132	32.4	-5.292604	32.4	-5.348069	32.4	-5.308184	32.4	-5.227051
32.6	-5.60521	32.6	-5.744968	32.6	-5.751246	32.6	-5.615025	32.6	-5.626131	32.6	-5.706586	32.6	-5.656755	32.6	-5.510411	32.6	-5.340151	32.6	-5.482431	32.6	-5.474496	32.6	-5.347159	32.6	-5.322811	32.6	-5.376453	32.6	-5.33611	32.6	-5.258677
32.8	-5.633282	32.8	-5.765237	32.8	-5.780094	32.8	-5.641396	32.8	-5.650598	32.8	-5.734594	32.8	-5.681705	32.8	-5.533218	32.8	-5.359476	32.8	-5.50671	32.8	-5.503951	32.8	-5.371827	32.8	-5.349363	32.8	-5.409317	32.8	-5.36472	32.8	-5.280544
33	-5.653988	33	-5.794549	33	-5.804768	33	-5.670003	33	-5.673877	33	-5.757763	33	-5.70877	33	-5.562794	33	-5.384829	33	-5.535717	33	-5.527256	33	-5.40125	33	-5.369516	33	-5.429484	33	-5.388659	33	-5.307871
33.2	-5.676929	33.2	-5.81896	33.2	-5.82809	33.2	-5.691123	33.2	-5.699499	33.2	-5.787138	33.2	-5.729354	33.2	-5.581959	33.2	-5.400744	33.2	-5.560962	33.2	-5.55185	33.2	-5.420275	33.2	-5.398165	33.2	-5.453282	33.2	-5.413365	33.2	-5.328967
33.4	-5.699303	33.4	-5.839409	33.4	-5.847571	33.4	-5.713833	33.4	-5.716614	33.4	-5.80629	33.4	-5.751596	33.4	-5.604729	33.4	-5.42912	33.4	-5.576847	33.4	-5.569592	33.4	-5.441268	33.4	-5.411278	33.4	-5.471014	33.4	-5.428379	33.4	-5.349545
33.6	-5.724345	33.6	-5.859869	33.6	-5.867137	33.6	-5.734871	33.6	-5.739377	33.6	-5.823826	33.6	-5.768454	33.6	-5.62728	33.6	-5.444622	33.6	-5.598855	33.6	-5.587614	33.6	-5.458248	33.6	-5.434643	33.6	-5.491322	33.6	-5.448973	33.6	-5.365983
33.8	-5.737463	33.8	-5.879933	33.8	-5.88742	33.8	-5.746316	33.8	-5.75754	33.8	-5.844481	33.8	-5.789833	33.8	-5.647035	33.8	-5.460675	33.8	-5.611978	33.8	-5.603993	33.8	-5.479847	33.8	-5.451987	33.8	-5.506955	33.8	-5.466244	33.8	-5.38315
34	-5.758544	34	-5.900438	34	-5.905581	34	-5.769274	34	-5.775936	34	-5.861253	34	-5.805544	34	-5.665812	34	-5.482927	34	-5.635203	34	-5.625285	34	-5.493984	34	-5.467384	34	-5.531379	34	-5.486796	34	-5.402869
34.2	-5.77309	34.2	-5.912444	34.2	-5.920411	34.2	-5.783681	34.2	-5.791045	34.2	-5.878644	34.2	-5.827491	34.2	-5.679235	34.2	-5.496653	34.2	-5.647751	34.2	-5.641249	34.2	-5.517788	34.2	-5.487611	34.2	-5.537468	34.2	-5.503664	34.2	-5.416575
34.4	-5.788087	34.4	-5.928989	34.4	-5.930091	34.4	-5.797255	34.4	-5.805984	34.4	-5.893014	34.4	-5.838377	34.4	-5.696074	34.4	-5.509691	34.4	-5.663902	34.4	-5.658266	34.4	-5.529445	34.4	-5.498724	34.4	-5.555494	34.4	-5.512408	34.4	-5.435575
34.6	-5.800004	34.6	-5.938346	34.6	-5.944519	34.6	-5.811005	34.6	-5.822334	34.6	-5.907422	34.6	-5.848231	34.6	-5.712229	34.6	-5.523995	34.6	-5.674855	34.6	-5.668212	34.6	-5.536762	34.6	-5.511442	34.6	-5.565963	34.6	-5.523705	34.6	-5.442002
34.8	-5.80839	34.8	-5.952172	34.8	-5.953105	34.8	-5.818789	34.8	-5.828999	34.8	-5.913126	34.8	-5.862605	34.8	-5.71757	34.8	-5.529109	34.8	-5.683581	34.8	-5.678634	34.8	-5.550932	34.8	-5.52076	34.8	-5.57684	34.8	-5.538258	34.8	-5.453176
35	-1.059169	35	-1.104576	35	-1.081483	35	-1.050453	35	-1.075421	35	-1.074542	35	-1.05614	35	-1.042257	35	-0.9871574	35	-1.040927	35	-1.023131	35	-0.9702721	35	-0.9773877	35	-0.970822	35	-0.9611929	35	-0.9483117
35.2	-1.013215	35.2	-1.054107	35.2	-1.034051	35.2	-1.000771	35.2	-1.030102	35.2	-1.030109	35.2	-1.003853	35.2	-1.004596	35.2	-0.9457213	35.2	-0.9924848	35.2	-0.969037	35.2	-0.9297156	35.2	-0.9415129	35.2	-0.9303503	35.2	-0.9239603	35.2	-0.9063457
35.4	-0.9718862	35.4	-1.008853	35.4	-0.9888094	35.4	-0.9581106	35.4	-0.9806191	35.4	-0.9848708	35.4	-0.9635695	35.4	-0.9609172	35.4	-0.8931519	35.4	-0.9422126	35.4	-0.9215317	35.4	-0.8955648	35.4	-0.8987817	35.4	-0.8804358	35.4	-0.8751217	35.4	-0.8665135
35.6	-0.9332023	35.6	-0.9740037	35.6	-0.9573659	35.6	-0.9211564	35.6	-0.9539796	35.6	-0.9423972	35.6	-0.9290388	35.6	-0.9184778	35.6	-0.8562952	35.6	-0.9052474	35.6	-0.8830774	35.6	-0.8507118	35.6	-0.8575228	35.6	-0.8474801	35.6	-0.8338	35.6	-0.8322553
35.8	-0.9025256	35.8	-0.9436414	35.8	-0.9232337	35.8	-0.8870643	35.8	-0.921645	35.8	-0.9119517	35.8	-0.8939119	35.8	-0.8940547	35.8	-0.8249782	35.8	-0.879881	35.8	-0.8492111	35.8	-0.8238335	35.8	-0.8246201	35.8	-0.8204868	35.8	-0.807714	35.8	-0.7972421
36	-0.8790835	36	-0.9197243	36	-0.8948977	36	-0.8674824	36	-0.8973979	36	-0.8887967	36	-0.8687621	36	-0.866369	36	-0.8034487	36	-0.8448002	36	-0.8216476	36	-0.7927935	36	-0.8006735	36	-0.7890807	36	-0.7795112	36	-0.7668897
36.2	-0.859437	36.2	-0.8943796	36.2	-0.8713607	36.2	-0.8434294	36.2	-0.8761714	36.2	-0.8633977	36.2	-0.855333	36.2	-0.8421174	36.2	-0.7786829	36.2	-0.8246765	36.2	-0.8028437	36.2	-0.7760537	36.2	-0.7760935	36.2	-0.7662583	36.2	-0.7576947	36.2	-0.7497143
36.4	-0.8403532	36.4	-0.8829051	36.4	-0.8563577	36.4	-0.8278704	36.4	-0.8599926	36.4	-0.8493518	36.4	-0.8310552	36.4	-0.8231949	36.4	-0.7578809	36.4	-0.8064123	36.4	-0.7780578	36.4	-0.7535442	36.4	-0.7608746	36.4	-0.7483443	36.4	-0.7413744	36.4	-0.7341505
36.6	-0.8241748	36.6	-0.8604826	36.6	-0.8402505	36.6	-0.8087451	36.6	-0.843919	36.6	-0.8290574	36.6	-0.8156438	36.6	-0.8066442	36.6	-0.7457175	36.6	-0.7890877	36.6	-0.7603771	36.6	-0.7376999	36.6	-0.7383088	36.6	-0.7355068	36.6	-0.7227577	36.6	-0.7110362
36.8	-0.8103051	36.8	-0.8479195	36.8	-0.8231463	36.8	-0.7944683	36.8	-0.8235989	36.8	-0.8148049	36.8	-0.8009926	36.8	-0.7947361	36.8	-0.7222676	36.8	-0.7718072	36.8	-0.7474121	36.8	-0.7179304	36.8	-0.7277871	36.8	-0.7183596	36.8	-0.7051051	36.8	-0.6997563
37	-0.7946579	37	-0.8291854	37	-0.8174164	37	-0.7812538	37	-0.8108118	37	-0.79917	37	-0.7870288	37	-0.7815303	37	-0.7153173	37	-0.7575321	37	-0.731305	37	-0.7069651	37	-0.7127879	37	-0.7040678	37	-0.6901634	37	-0.6912864
37.2	-0.7850998	37.2	-0.8236534	37.2	-0.8016455	37.2	-0.7719077	37.2	-0.7979641	37.2	-0.7851845	37.2	-0.7764352	37.2	-0.7679271	37.2	-0.7046255	37.2	-0.7503655	37.2	-0.7208839	37.2	-0.6959582	37.2	-0.7047747	37.2	-0.6906853	37.2	-0.6792998	37.2	-0.6778899
37.4	-0.7759451	37.4	-0.8095416	37.4	-0.788545	37.4	-0.758504	37.4	-0.7922162	37.4	-0.7801685	37.4	-0.7603264	37.4	-0.7571064	37.4	-0.6884311	37.4	-0.7346537	37.4	-0.7062284	37.4	-0.6861635	37.4	-0.6887787	37.4	-0.6776863	37.4	-0.665886	37.4	-0.6655629
37.6	-0.763635	37.6	-0.8025474	37.6	-0.7799017	37.6	-0.7533504	37.6	-0.7807343	37.6	-0.7667598	37.6	-0.7502945	37.6	-0.748594	37.6	-0.6785751	37.6	-0.7268894	37.6	-0.7023095	37.6	-0.678206	37.6	-0.6849772	37.6	-0.6691715	37.6	-0.6636426	37.6	-0.651406
37.8	-0.7562264	37.8	-0.7927635	37.8	-0.7695307	37.8	-0.7366213	37.8	-0.7731397	37.8	-0.7542148	37.8	-0.7431164	37.8	-0.7374316	37.8	-0.6744791	37.8	-0.7169983	37.8	-0.6880672	37.8	-0.6711344	37.8	-0.6660301	37.8	-0.6599081	37.8	-0.6486664	37.8	-0.6450704
38	-0.7447172	38	-0.7824103	38	-0.7583601	38	-0.7302532	38	-0.7614258	38	-0.7508243	38	-0.7390158	38	-0.7294998	38	-0.6611282	38	-0.7062801	38	-0.6813439	38	-0.6570691	38	-0.6613864	38	-0.6509758	38	-0.6402861	38	-0.6352733
38.2	-0.7391966	38.2	-0.7748342	38.2	-0.7470652	38.2	-0.7177214	38.2	-0.7521989	38.2	-0.7378382	38.2	-0.7266979	38.2	-0.7179246	38.2	-0.6525508	38.2	-0.6989455	38.2	-0.6715606	38.2	-0.6477854	38.2	-0.6562142	38.2	-0.6415508	38.2	-0.6304723	38.2	-0.629573
38.4	-0.7291622	38.4	-0.7693276	38.4	-0.7454476	38.4	-0.7156664	38.4	-0.746907	38.4	-0.7314041	38.4	-0.7195737	38.4	-0.7153729	38.4	-0.6477794	38.4	-0.6869779	38.4	-0.6633964	38.4	-0.6393714	38.4	-0.6466295	38.4	-0.6343307	38.4	-0.6191648	38.4	-0.6206461
38.6	-0.7246767	38.6	-0.755251	38.6	-0.7358279	38.6	-0.7056984	38.6	-0.7366769	38.6	-0.7215054	38.6	-0.710283	38.6	-0.704897	38.6	-0.6398506	38.6	-0.681006	38.6	-0.6562006	38.6	-0.6277383	38.6	-0.6442972	38.6	-0.625634	38.6	-0.6170144	38.6	-0.6137658
38.8	-0.7106516	38.8	-0.752689	38.8	-0.7284456	38.8	-0.7020172	38.8	-0.7303904	38.8	-0.7151313	38.8	-0.7050664	38.8	-0.696032	38.8	-0.63201	38.8	-0.6774283	38.8	-0.6501656	38.8	-0.625669	38.8	-0.6302788	38.8	-0.6230529	38.8	-0.6118296	38.8	-0.6060767
39	-0.7077088	39	-0.7459986	39	-0.7255619	39	-0.6960266	39	-0.7238162	39	-0.7101429	39	-0.6996524	39	-0.6894176	39	-0.6304205	39	-0.672994	39	-0.6412562	39	-0.6226232	39	-0.6267244	39	-0.6123617	39	-0.6012865	39	-0.603596
39.2	-0.7063333	39.2	-0.7400138	39.2	-0.7159263	39.2	-0.6859158	39.2	-0.7199742	39.2	-0.7057242	39.2	-0.6896954	39.2	-0.6860259	39.2	-0.6214298	39.2	-0.6620833	39.2	-0.6322627	39.2	-0.6104231	39.2	-0.6184042	39.2	-0.6075667	39.2	-0.5920034	39.2	-0.5942348
39.4	-0.6980339	39.4	-0.7353272	39.4	-0.7079949	39.4	-0.6846148	39.4	-0.7092195	39.4	-0.695203	39.4	-0.6839724	39.4	-0.6800254	39.4	-0.6129496	39.4	-0.6580402	39.4	-0.6280118	39.4	-0.6027804	39.4	-0.6149645	39.4	-0.603223	39.4	-0.5885252	39.4	-0.5855888
39.6	-0.6944896	39.6	-0.7283343	39.6	-0.7030814	39.6	-0.676204	39.6	-0.7093495	39.6	-0.6909675	39.6	-0.6833693	39.6	-0.6757171	39.6	-0.608546	39.6	-0.6523489	39.6	-0.6214041	39.6	-0.6016186	39.6	-0.6074102	39.6	-0.5967115	39.6	-0.5875564	39.6	-0.5814001
39.8	-0.6884301	39.8	-0.7246917	39.8	-0.7005721	39.8	-0.6721007	39.8	-0.7014735	39.8	-0.686671	39.8	-0.6799207	39.8	-0.6720526	39.8	-0.6085402	39.8	-0.6471003	39.8	-0.6246945	39.8	-0.6008818	39.8	-0.6056172	39.8	-0.593345	39.8	-0.5859982	39.8	-0.5779243
40	-5.040419	40	-5.065309	40	-5.114499	40	-4.958614	40	-4.949217	40	-5.040856	40	-4.969454	40	-4.841447	40	-4.809836	40	-4.872416	40	-4.849042	40	-4.699505	40	-4.689751	40	-4.722232	40	-4.702672	40	-4.662553
40.2	-5.262229	40.2	-5.357929	40.2	-5.370687	40.2	-5.223302	40.2	-5.238259	40.2	-5.316958	40.2	-5.247493	40.2	-5.131961	40.2	-5.006898	40.2	-5.139148	40.2	-5.117419	40.2	-4.980402	40.2	-4.964192	40.2	-5.009447	40.2	-4.97533	40.2	-4.909183
40.4	-5.368281	40.4	-5.495578	40.4	-5.487361	40.4	-5.348257	40.4	-5.361227	40.4	-5.439648	40.4	-5.375143	40.4	-5.257479	40.4	-5.112634	40.4	-5.255936	40.4	-5.226185	40.4	-5.097895	40.4	-5.085829	40.4	-5.124829	40.4	-5.08992	40.4	-5.017067
40.6	-5.439815	40.6	-5.571084	40.6	-5.562295	40.6	-5.420068	40.6	-5.447528	40.6	-5.516353	40.6	-5.454813	40.6	-5.330876	40.6	-5.182864	40.6	-5.332229	40.6	-5.30249	40.6	-5.169136	40.6	-5.158464	40.6	-5.195007	40.6	-5.161312	40.6	-5.084917
40.8	-5.490692	40.8	-5.630242	40.8	-5.610941	40.8	-5.472025	40.8	-5.506582	40.8	-5.569562	40.8	-5.511532	40.8	-5.381	40.8	-5.225688	40.8	-5.382657	40.8	-5.353058	40.8	-5.224308	40.8	-5.213277	40.8	-5.247528	40.8	-5.2099	40.8	-5.135607
41	-5.52619	41	-5.673998	41	-5.656706	41	-5.517924	41	-5.543663	41	-5.612788	41	-5.556076	41	-5.427692	41	-5.263196	41	-5.420964	41	-5.388674	41	-5.263094	41	-5.254961	41	-5.29621	41	-5.256611	41	-5.17173
41.2	-5.564932	41.2	-5.711049	41.2	-5.690305	41.2	-5.550406	41.2	-5.579842	41.2	-5.645119	41.2	-5.591664	41.2	-5.460319	41.2	-5.298549	41.2	-5.453939	41.2	-5.429113	41.2	-5.301034	41.2	-5.287988	41.2	-5.326637	41.2	-5.289327	41.2	-5.214152
41.4	-5.593276	41.4	-5.738402	41.4	-5.72163	41.4	-5.5764	41.4	-5.60765	41.4	-5.673743	41.4	-5.622542	41.4	-5.493109	41.4	-5.325836	41.4	-5.488005	41.4	-5.459063	41.4	-5.325428	41.4	-5.321978	41.4	-5.353512	41.4	-5.316408	41.4	-5.238396
41.6	-5.608013	41.6	-5.761773	41.6	-5.745009	41.6	-5.607592	41.6	-5.636971	41.6	-5.699822	41.6	-5.647521	41.6	-5.513712	41.6	-5.349922	41.6	-5.511713	41.6	-5.479734	41.6	-5.350008	41.6	-5.340828	41.6	-5.381431	41.6	-5.338983	41.6	-5.260326
41.8	-5.636981	41.8	-5.784819	41.8	-5.767311	41.8	-5.621881	41.8	-5.658073	41.8	-5.723366	41.8	-5.667872	41.8	-5.536842	41.8	-5.368614	41.8	-5.533197	41.8	-5.509101	41.8	-5.3705	41.8	-5.368154	41.8	-5.398492	41.8	-5.365405	41.8	-5.287056
42	-5.655487	42	-5.807964	42	-5.786757	42	-5.64122	42	-5.677175	42	-5.74748	42	-5.687846	42	-5.5582	42	-5.386155	42	-5.555802	42	-5.523374	42	-5.393394	42	-5.383372	42	-5.421724	42	-5.384066	42	-5.307865
42.2	-5.675162	42.2	-5.830475	42.2	-5.808142	42.2	-5.663243	42.2	-5.697107	42.2	-5.757291	42.2	-5.710126	42.2	-5.580585	42.2	-5.403759	42.2	-5.569423	42.2	-5.537941	42.2	-5.410316	42.2	-5.400116	42.2	-5.437474	42.2	-5.398274	42.2	-5.317656
42.4	-5.698965	42.4	-5.842516	42.4	-5.826373	42.4	-5.679457	42.4	-5.711556	42.4	-5.778381	42.4	-5.729645	42.4	-5.592843	42.4	-5.4216	42.4	-5.586533	42.4	-5.560122	42.4	-5.428373	42.4	-5.411911	42.4	-5.456844	42.4	-5.413758	42.4	-5.33375
42.6	-5.712068	42.6	-5.861341	42.6	-5.840764	42.6	-5.697406	42.6	-5.729949	42.6	-5.791119	42.6	-5.739482	42.6	-5.610615	42.6	-5.432538	42.6	-5.600196	42.6	-5.570493	42.6	-5.43886	42.6	-5.429496	42.6	-5.469396	42.6	-5.430913	42.6	-5.348745
42.8	-5.720843	42.8	-5.873279	42.8	-5.85157	42.8	-5.710158	42.8	-5.743212	42.8	-5.810549	42.8	-5.756748	42.8	-5.627732	42.8	-5.449983	42.8	-5.612905	42.8	-5.588735	42.8	-5.457416	42.8	-5.442392	42.8	-5.484126	42.8	-5.448199	42.8	-5.363226
43	-5.728973	43	-5.889112	43	-5.866079	43	-5.721608	43	-5.752716	43	-5.82113	43	-5.763683	43	-5.639458	43	-5.457675	43	-5.627714	43	-5.600988	43	-5.469573	43	-5.455163	43	-5.498342	43	-5.460198	43	-5.373989
43.2	-5.742596	43.2	-5.900066	43.2	-5.88275	43.2	-5.736878	43.2	-5.768121	43.2	-5.829367	43.2	-5.773351	43.2	-5.647934	43.2	-5.474446	43.2	-5.637749	43.2	-5.609272	43.2	-5.477985	43.2	-5.46571	43.2	-5.510968	43.2	-5.470062	43.2	-5.383251
43.4	-5.756202	43.4	-5.916143	43.4	-5.885931	43.4	-5.747509	43.4	-5.78346	43.4	-5.845071	43.4	-5.786806	43.4	-5.660088	43.4	-5.47789	43.4	-5.647315	43.4	-5.619942	43.4	-5.489283	43.4	-5.479008	43.4	-5.516862	43.4	-5.476821	43.4	-5.393986
43.6	-5.762162	43.6	-5.922994	43.6	-5.902324	43.6	-5.758632	43.6	-5.78658	43.6	-5.852627	43.6	-5.800402	43.6	-5.669497	43.6	-5.490119	43.6	-5.662563	43.6	-5.635707	43.6	-5.500515	43.6	-5.489781	43.6	-5.528503	43.6	-5.486209	43.6	-5.404808
43.8	-5.773712	43.8	-5.929284	43.8	-5.909091	43.8	-5.762918	43.8	-5.797924	43.8	-5.864986	43.8	-5.808061	43.8	-5.672804	43.8	-5.504662	43.8	-5.668921	43.8	-5.640883	43.8	-5.509788	43.8	-5.498109	43.8	-5.540212	43.8	-5.499512	43.8	-5.416138
44	-5.780863	44	-5.936853	44	-5.921025	44	-5.775078	44	-5.808126	44	-5.871989	44	-5.820308	44	-5.689917	44	-5.513753	44	-5.67768	44	-5.658807	44	-5.517106	44	-5.51297	44	-5.545843	44	-5.510621	44	-5.427722
44.2	-5.789679	44.2	-5.954727	44.2	-5.932514	44.2	-5.782568	44.2	-5.81641	44.2	-5.880087	44.2	-5.827657	44.2	-5.696697	44.2	-5.520836	44.2	-5.686228	44.2	-5.661834	44.2	-5.531099	44.2	-5.516872	44.2	-5.558026	44.2	-5.519287	44.2	-5.436156
44.4	-5.800639	44.4	-5.962537	44.4	-5.938137	44.4	-5.788858	44.4	-5.824883	44.4	-5.892979	44.4	-5.840446	44.4	-5.701732	44.4	-5.525945	44.4	-5.695909	44.4	-5.671957	44.4	-5.531546	44.4	-5.529486	44.4	-5.56307	44.4	-5.52754	44.4	-5.440953
44.6	-5.805418	44.6	-5.96753	44.6	-5.947766	44.6	-5.797818	44.6	-5.833321	44.6	-5.898022	44.6	-5.849013	44.6	-5.718419	44.6	-5.531704	44.6	-5.70428	44.6	-5.676808	44.6	-5.539446	44.6	-5.533611	44.6	-5.572335	44.6	-5.536349	44.6	-5.451287
44.8	-5.813717	44.8	-5.968899	44.8	-5.948539	44.8	-5.799871	44.8	-5.839339	44.8	-5.903323	44.8	-5.849763	44.8	-5.716381	44.8	-5.538546	44.8	-5.712188	44.8	-5.678269	44.8	-5.549726	44.8	-5.539506	44.8	-5.579521	44.8	-5.539429	44.8	-5.457032
45	-1.003353	45	-1.062665	45	-1.01105	45	-0.9694219	45	-1.026596	45	-1.001473	45	-0.9763914	45	-0.9793274	45	-0.9152953	45	-0.9910404	45	-0.950368	45	-0.897826	45	-0.9266214	45	-0.8946069	45	-0.8966348	45	-0.875981
45.2	-0.9537306	45.2	-1.01133	45.2	-0.9623634	45.2	-0.9296606	45.2	-0.9746687	45.2	-0.9557725	45.2	-0.9371194	45.2	-0.9304624	45.2	-0.8807051	45.2	-0.9494273	45.2	-0.907803	45.2	-0.8603083	45.2	-0.8876289	45.2	-0.8732256	45.2	-0.8571392	45.2	-0.8525007
45.4	-0.908645	45.4	-0.9660673	45.4	-0.9183029	45.4	-0.8851813	45.4	-0.9295639	45.4	-0.9094893	45.4	-0.8909345	45.4	-0.8950215	45.4	-0.8352709	45.4	-0.9008793	45.4	-0.8563715	45.4	-0.8224712	45.4	-0.8484499	45.4	-0.8355547	45.4	-0.81273	45.4	-0.8105815
45.6	-0.872645	45.6	-0.9292767	45.6	-0.8852406	45.6	-0.8517631	45.6	-0.8961422	45.6	-0.8691878	45.6	-0.8564953	45.6	-0.854637	45.6	-0.7982245	45.6	-0.8605205	45.6	-0.8202578	45.6	-0.7878843	45.6	-0.8045212	45.6	-0.7962993	45.6	-0.7778029	45.6	-0.7757025
45.8	-0.8464647	45.8	-0.9020831	45.8	-0.8584934	45.8	-0.8222268	45.8	-0.8691137	45.8	-0.8359435	45.8	-0.8308743	45.8	-0.8266938	45.8	-0.7681184	45.8	-0.8300157	45.8	-0.7937289	45.8	-0.7546968	45.8	-0.7818851	45.8	-0.7647422	45.8	-0.7449896	45.8	-0.7496983
46	-0.8268412	46	-0.8800002	46	-0.8311696	46	-0.7973156	46	-0.8485361	46	-0.8159402	46	-0.8046758	46	-0.8038577	46	-0.7471249	46	-0.8077013	46	-0.7609119	46	-0.7271656	46	-0.7545246	46	-0.7340156	46	-0.7201044	46	-0.7230362
46.2	-0.8006446	46.2	-0.8619172	46.2	-0.8141201	46.2	-0.7770926	46.2	-0.8295503	46.2	-0.7941122	46.2	-0.7833977	46.2	-0.777767	46.2	-0.7249596	46.2	-0.7878094	46.2	-0.7414657	46.2	-0.7064775	46.2	-0.7343295	46.2	-0.7153998	46.2	-0.6982675	46.2	-0.7010926
46.4	-0.7839761	46.4	-0.8400728	46.4	-0.7968634	46.4	-0.7527031	46.4	-0.8117987	46.4	-0.770397	46.4	-0.7651961	46.4	-0.7618301	46.4	-0.7066613	46.4	-0.7670005	46.4	-0.7269746	46.4	-0.6924513	46.4	-0.7183056	46.4	-0.6974645	46.4	-0.6856769	46.4	-0.6798684
46.6	-0.7673508	46.6	-0.8256442	46.6	-0.7797247	46.6	-0.7416012	46.6	-0.7951379	46.6	-0.7628305	46.6	-0.7539907	46.6	-0.7498486	46.6	-0.6924567	46.6	-0.7541026	46.6	-0.7095552	46.6	-0.6768366	46.6	-0.7046077	46.6	-0.6825348	46.6	-0.669047	46.6	-0.6645078
46.8	-0.7535144	46.8	-0.8117099	46.8	-0.7623219	46.8	-0.7246906	46.8	-0.7756092	46.8	-0.7437574	46.8	-0.7374551	46.8	-0.7319547	46.8	-0.6786408	46.8	-0.7353398	46.8	-0.6960014	46.8	-0.6572882	46.8	-0.6881052	46.8	-0.6608275	46.8	-0.6528629	46.8	-0.6530766
47	-0.7405017	47	-0.7949086	47	-0.7531289	47	-0.7166917	47	-0.7656217	47	-0.7318754	47	-0.7183586	47	-0.7170479	47	-0.6688073	47	-0.724775	47	-0.6812417	47	-0.6524558	47	-0.6756076	47	-0.6532431	47	-0.6405368	47	-0.6338267
47.2	-0.7321033	47.2	-0.7854335	47.2	-0.7435582	47.2	-0.7007933	47.2	-0.7553714	47.2	-0.720053	47.2	-0.7099009	47.2	-0.7074316	47.2	-0.6522577	47.2	-0.7122217	47.2	-0.6684325	47.2	-0.6407393	47.2	-0.6638655	47.2	-0.6353464	47.2	-0.6248986	47.2	-0.6263704
47.4	-0.7188589	47.4	-0.7723095	47.4	-0.7243842	47.4	-0.692357	47.4	-0.7461552	47.4	-0.7089213	47.4	-0.7009907	47.4	-0.6971106	47.4	-0.6420928	47.4	-0.703131	47.4	-0.660289	47.4	-0.6286637	47.4	-0.6545119	47.4	-0.6259098	47.4	-0.615431	47.4	-0.6169551
47.6	-0.7079682	47.6	-0.7624922	47.6	-0.717178	47.6	-0.6805295	47.6	-0.7367245	47.6	-0.6958244	47.6	-0.6901746	47.6	-0.6864616	47.6	-0.6335995	47.6	-0.6950621	47.6	-0.6505961	47.6	-0.6229892	47.6	-0.6414161	47.6	-0.6196344	47.6	-0.6049713	47.6	-0.6035715
47.8	-0.6985296	47.8	-0.7546063	47.8	-0.7036212	47.8	-0.6719189	47.8	-0.7246708	47.8	-0.6877429	47.8	-0.6821903	47.8	-0.6777372	47.8	-0.6202644	47.8	-0.6803904	47.8	-0.6370567	47.8	-0.6107457	47.8	-0.6359554	47.8	-0.6109431	47.8	-0.5939969	47.8	-0.5941305
48	-0.6956648	48	-0.7481332	48	-0.6982685	48	-0.6659763	48	-0.7156714	48	-0.6828833	48	-0.6762615	48	-0.6697377	48	-0.6186486	48	-0.6699461	48	-0.6308671	48	-0.6002482	48	-0.6219999	48	-0.5967973	48	-0.5864902	48	-0.5888495
48.2	-0.6841487	48.2	-0.7395332	48.2	-0.6895068	48.2	-0.6605579	48.2	-0.7099336	48.2	-0.6701484	48.2	-0.6654844	48.2	-0.663358	48.2	-0.6097551	48.2	-0.6661114	48.2	-0.62522	48.2	-0.5882386	48.2	-0.6168022	48.2	-0.5932999	48.2	-0.5818326	48.2	-0.5770763
48.4	-0.6799663	48.4	-0.7284271	48.4	-0.6848265	48.4	-0.6459455	48.4	-0.7055449	48.4	-0.6650085	48.4	-0.6595773	48.4	-0.6535725	48.4	-0.5982692	48.4	-0.6554081	48.4	-0.613349	48.4	-0.5865011	48.4	-0.611168	48.4	-0.5863778	48.4	-0.5754724	48.4	-0.5712225
48.6	-0.6747108	48.6	-0.7283195	48.6	-0.6749614	48.6	-0.6434937	48.6	-0.691526	48.6	-0.6588129	48.6	-0.6535648	48.6	-0.6440587	48.6	-0.5911424	48.6	-0.6547507	48.6	-0.6051161	48.6	-0.5765853	48.6	-0.6039007	48.6	-0.5750515	48.6	-0.5646015	48.6	-0.5662857
48.8	-0.6635944	48.8	-0.717907	48.8	-0.6695346	48.8	-0.6350269	48.8	-0.6859667	48.8	-0.6456634	48.8	-0.6435238	48.8	-0.6422804	48.8	-0.5895206	48.8	-0.6433443	48.8	-0.6026627	48.8	-0.5711855	48.8	-0.5940701	48.8	-0.5715396	48.8	-0.5611913	48.8	-0.5553843
49	-0.6530541	49	-0.7131572	49	-0.6636901	49	-0.6289508	49	-0.6805112	49	-0.6466103	49	-0.6346874	49	-0.6349108	49	-0.579529	49	-0.6350737	49	-0.5917866	49	-0.5626764	49	-0.5904177	49	-0.5661829	49	-0.5526989	49	-0.5526224
49.2	-0.6515877	49.2	-0.7067248	49.2	-0.657779	49.2	-0.6208275	49.2	-0.6783476	49.2	-0.6392853	49.2	-0.6310986	49.2	-0.6285047	49.2	-0.5748296	49.2	-0.634409	49.2	-0.5892735	49.2	-0.5526488	49.2	-0.5830736	49.2	-0.5578856	49.2	-0.5442473	49.2	-0.5494228
49.4	-0.644806	49.4	-0.7028456	49.4	-0.6508746	49.4	-0.6190785	49.4	-0.6684218	49.4	-0.6321307	49.4	-0.6279492	49.4	-0.6225083	49.4	-0.5637603	49.4	-0.6264019	49.4	-0.5830277	49.4	-0.5492665	49.4	-0.5778589	49.4	-0.5527521	49.4	-0.5389106	49.4	-0.5430797
49.6	-0.6418597	49.6	-0.6950697	49.6	-0.6475701	49.6	-0.6148408	49.6	-0.6658263	49.6	-0.6278623	49.6	-0.6207616	49.6	-0.6147267	49.6	-0.5616603	49.6	-0.6219702	49.6	-0.5794687	49.6	-0.553911	49.6	-0.5752913	49.6	-0.5500826	49.6	-0.5387834	49.6	-0.5350267
49.8	-0.6399635	49.8	-0.6877722	49.8	-0.6463565	49.8	-0.6110257	49.8	-0.6632519	49.8	-0.6229342	49.8	-0.6185244	49.8	-0.6144814	49.8	-0.5575661	49.8	-0.6202327	49.8	-0.5767352	49.8	-0.5477371	49.8	-0.5714776	49.8	-0.5465761	49.8	-0.5343155	49.8	-0.5327708
50	-5.031717	50	-5.08336	50	-5.049784	50	-4.922362	50	-4.927154	50	-4.993093	50	-4.941714	50	-4.837806	50	-4.836033	50	-4.89052	50	-4.891341	50	-4.707907	50	-4.648254	50	-4.773116	50	-4.705407	50	-4.670591
50.2	-5.235381	50.2	-5.35545	50.2	-5.311497	50.2	-5.178344	50.2	-5.211326	50.2	-5.267058	50.2	-5.21309	50.2	-5.107904	50.2	-5.007265	50.2	-5.148961	50.2	-5.118823	50.2	-4.951174	50.2	-4.939982	50.2	-5.003847	50.2	-4.963192	50.2	-4.90143
50.4	-5.335465	50.4	-5.47829	50.4	-5.428568	50.4	-5.289245	50.4	-5.340421	50.4	-5.381629	50.4	-5.328881	50.4	-5.21483	50.4	-5.092017	50.4	-5.250391	50.4	-5.211527	50.4	-5.06826	50.4	-5.060265	50.4	-5.10307	50.4	-5.063936	50.4	-4.990173
50.6	-5.396286	50.6	-5.550566	50.6	-5.499365	50.6	-5.362626	50.6	-5.409662	50.6	-5.453662	50.6	-5.401991	50.6	-5.28381	50.6	-5.145444	50.6	-5.307019	50.6	-5.269744	50.6	-5.126248	50.6	-5.132493	50.6	-5.161919	50.6	-5.121358	50.6	-5.046065
50.8	-5.441543	50.8	-5.599977	50.8	-5.551596	50.8	-5.410128	50.8	-5.461507	50.8	-5.5071	50.8	-5.456851	50.8	-5.336137	50.8	-5.190173	50.8	-5.356903	50.8	-5.311534	50.8	-5.17738	50.8	-5.176324	50.8	-5.210813	50.8	-5.171281	50.8	-5.097912
51	-5.479417	51	-5.640751	51	-5.589801	51	-5.452323	51	-5.499949	51	-5.549861	51	-5.493469	51	-5.377041	51	-5.225387	51	-5.395744	51	-5.350419	51	-5.211966	51	-5.215621	51	-5.244549	51	-5.209464	51	-5.134387
51.2	-5.512747	51.2	-5.672846	51.2	-5.618647	51.2	-5.478037	51.2	-5.532268	51.2	-5.577268	51.2	-5.525797	51.2	-5.405816	51.2	-5.251804	51.2	-5.426531	51.2	-5.384581	51.2	-5.246134	51.2	-5.249495	51.2	-5.278913	51.2	-5.238315	51.2	-5.162975
51.4	-5.533689	51.4	-5.700874	51.4	-5.647024	51.4	-5.504924	51.4	-5.558597	51.4	-5.605589	51.4	-5.554667	51.4	-5.433843	51.4	-5.27905	51.4	-5.446521	51.4	-5.411448	51.4	-5.273169	51.4	-5.278953	51.4	-5.302768	51.4	-5.266964	51.4	-5.188503
51.6	-5.558618	51.6	-5.725008	51.6	-5.673891	51.6	-5.53137	51.6	-5.581829	51.6	-5.63047	51.6	-5.579731	51.6	-5.458233	51.6	-5.302475	51.6	-5.472327	51.6	-5.425095	51.6	-5.289005	51.6	-5.300849	51.6	-5.322727	51.6	-5.294243	51.6	-5.207142
51.8	-5.575179	51.8	-5.741933	51.8	-5.692509	51.8	-5.558009	51.8	-5.602969	51.8	-5.653799	51.8	-5.597194	51.8	-5.474998	51.8	-5.320117	51.8	-5.492154	51.8	-5.450264	51.8	-5.310409	51.8	-5.319577	51.8	-5.344908	51.8	-5.31291	51.8	-5.227341
52	-5.595784	52	-5.762314	52	-5.710802	52	-5.571058	52	-5.627155	52	-5.664164	52	-5.61662	52	-5.488479	52	-5.332592	52	-5.509518	52	-5.462707	52	-5.327731	52	-5.333076	52	-5.361182	52	-5.326175	52	-5.239755
52.2	-5.61004	52.2	-5.778909	52.2	-5.729296	52.2	-5.581985	52.2	-5.636836	52.2	-5.684206	52.2	-5.633654	52.2	-5.511939	52.2	-5.348519	52.2	-5.523549	52.2	-5.485336	52.2	-5.343556	52.2	-5.350476	52.2	-5.3749	52.2	-5.342226	52.2	-5.258818
52.4	-5.628276	52.4	-5.79644	52.4	-5.741332	52.4	-5.600156	52.4	-5.653683	52.4	-5.699541	52.4	-5.645191	52.4	-5.521148	52.4	-5.363548	52.4	-5.540419	52.4	-5.490639	52.4	-5.359086	52.4	-5.362133	52.4	-5.391998	52.4	-5.35494	52.4	-5.27031
52.6	-5.638098	52.6	-5.806634	52.6	-5.755722	52.6	-5.608507	52.6	-5.664954	52.6	-5.7077	52.6	-5.656932	52.6	-5.537955	52.6	-5.378005	52.6	-5.550747	52.6	-5.506698	52.6	-5.366508	52.6	-5.376036	52.6	-5.404517	52.6	-5.365384	52.6	-5.286557
52.8	-5.649488	52.8	-5.821752	52.8	-5.766704	52.8	-5.624557	52.8	-5.676319	52.8	-5.726101	52.8	-5.672316	52.8	-5.551386	52.8	-5.387135	52.8	-5.568554	52.8	-5.516972	52.8	-5.383959	52.8	-5.386288	52.8	-5.419359	52.8	-5.378856	52.8	-5.295697
53	-5.660429	53	-5.839013	53	-5.782792	53	-5.637482	53	-5.690959	53	-5.735534	53	-5.683836	53	-5.560812	53	-5.397133	53	-5.577138	53	-5.529215	53	-5.386435	53	-5.39676	53	-5.422665	53	-5.387968	53	-5.302328
53.2	-5.670248	53.2	-5.838759	53.2	-5.790367	53.2	-5.653462	53.2	-5.698101	53.2	-5.744238	53.2	-5.693683	53.2	-5.572086	53.2	-5.407024	53.2	-5.584482	53.2	-5.537016	53.2	-5.402992	53.2	-5.408182	53.2	-5.431389	53.2	-5.397238	53.2	-5.316823
53.4	-5.679665	53.4	-5.851561	53.4	-5.79508	53.4	-5.654134	53.4	-5.711913	53.4	-5.756174	53.4	-5.702863	53.4	-5.576673	53.4	-5.415304	53.4	-5.591708	53.4	-5.550231	53.4	-5.417296	53.4	-5.415766	53.4	-5.445388	53.4	-5.412837	53.4	-5.324443
53.61	-5.688851	53.61	-5.860331	53.61	-5.80776	53.61	-5.664859	53.61	-5.723393	53.61	-5.763198	53.61	-5.716895	53.61	-5.588851	53.6	-5.422457	53.6	-5.604058	53.6	-5.555874	53.6	-5.421922	53.6	-5.43047	53.6	-5.453267	53.6	-5.420368	53.6	-5.336368
53.8	-5.699135	53.8	-5.869559	53.8	-5.815743	53.8	-5.674455	53.8	-5.728394	53.8	-5.772376	53.8	-5.72587	53.8	-5.598129	53.8	-5.429193	53.8	-5.611283	53.8	-5.565281	53.8	-5.431712	53.8	-5.439347	53.8	-5.463953	53.8	-5.427383	53.8	-5.342808
54	-5.701313	54	-5.874132	54	-5.827661	54	-5.677212	54	-5.736802	54	-5.781832	54	-5.732539	54	-5.610592	54	-5.43896	54	-5.620445	54	-5.575366	54	-5.435907	54	-5.448613	54	-5.468176	54	-5.43089	54	-5.349964
54.2	-5.713023	54.2	-5.883091	54.2	-5.83482	54.2	-5.689993	54.2	-5.750248	54.2	-5.789636	54.2	-5.736241	54.2	-5.610075	54.2	-5.445504	54.2	-5.627448	54.2	-5.583849	54.2	-5.444731	54.2	-5.452338	54.2	-5.480038	54.2	-5.446528	54.2	-5.357069
54.4	-5.721276	54.4	-5.891614	54.4	-5.838271	54.4	-5.701386	54.4	-5.751113	54.4	-5.79668	54.4	-5.747274	54.4	-5.622071	54.4	-5.455451	54.4	-5.636523	54.4	-5.589673	54.4	-5.452115	54.4	-5.459314	54.4	-5.484226	54.4	-5.449158	54.4	-5.362373
54.6	-5.72586	54.6	-5.89741	54.6	-5.847108	54.6	-5.703344	54.6	-5.758159	54.6	-5.801378	54.6	-5.751534	54.6	-5.625698	54.6	-5.464773	54.6	-5.643184	54.6	-5.593293	54.6	-5.45682	54.6	-5.462886	54.6	-5.489237	54.6	-5.453118	54.6	-5.372347
54.8	-5.726464	54.8	-5.904528	54.8	-5.852033	54.8	-5.706105	54.8	-5.759623	54.8	-5.808664	54.8	-5.756288	54.8	-5.634501	54.8	-5.465639	54.8	-5.646143	54.8	-5.597013	54.8	-5.46444	54.8	-5.473145	54.8	-5.493938	54.8	-5.459812	54.8	-5.373554
55	-0.9031183	55	-0.9848691	55	-0.9107581	55	-0.8661783	55	-0.9373449	55	-0.8936133	55	-0.8753757	55	-0.875019	55	-0.8304201	55	-0.9071369	55	-0.8605492	55	-0.7942979	55	-0.8361238	55	-0.7965925	55	-0.7959672	55	-0.778397
55.2	-0.8563036	55.2	-0.9342067	55.2	-0.8607322	55.2	-0.8253805	55.2	-0.896613	55.2	-0.849683	55.2	-0.8311445	55.2	-0.8340594	55.2	-0.7927321	55.2	-0.8692577	55.2	-0.8163412	55.2	-0.7687261	55.2	-0.7986836	55.2	-0.776815	55.2	-0.7619403	55.2	-0.756625
55.4	-0.8142013	55.4	-0.8908525	55.4	-0.8137175	55.4	-0.7808394	55.4	-0.8527373	55.4	-0.814595	55.4	-0.7866787	55.4	-0.7916886	55.4	-0.7472325	55.4	-0.8276836	55.4	-0.7718746	55.4	-0.7268145	55.4	-0.7625069	55.4	-0.7345404	55.4	-0.7216606	55.4	-0.7171861
55.6	-0.7760834	55.6	-0.8536563	55.6	-0.7833833	55.6	-0.7495442	55.6	-0.8152427	55.6	-0.7677398	55.6	-0.7493264	55.6	-0.7545512	55.6	-0.7144124	55.6	-0.7935581	55.6	-0.7348004	55.6	-0.6979365	55.6	-0.7259345	55.6	-0.6962196	55.6	-0.6812257	55.6	-0.6839518
55.8	-0.7554574	55.8	-0.8282345	55.8	-0.7564271	55.8	-0.7155159	55.8	-0.7859945	55.8	-0.7384479	55.8	-0.7266812	55.8	-0.7217674	55.8	-0.6854134	55.8	-0.7633718	55.8	-0.7058046	55.8	-0.6645966	55.8	-0.702032	55.8	-0.6673771	55.8	-0.6553007	55.8	-0.6522242
56	-0.7277313	56	-0.8047301	56	-0.7307856	56	-0.6941034	56	-0.762354	56	-0.7141706	56	-0.6992933	56	-0.696055	56	-0.6665047	56	-0.7344231	56	-0.6771601	56	-0.6412236	56	-0.6776837	56	-0.6410853	56	-0.6323157	56	-0.6302518
56.2	-0.705844	56.2	-0.7841472	56.2	-0.713912	56.2	-0.6708982	56.2	-0.7458163	56.2	-0.6958273	56.2	-0.6806345	56.2	-0.6810119	56.2	-0.6441014	56.2	-0.7152216	56.2	-0.6554359	56.2	-0.6178728	56.2	-0.6547942	56.2	-0.6176956	56.2	-0.6108285	56.2	-0.6081163
56.4	-0.6901118	56.4	-0.7630117	56.4	-0.6905627	56.4	-0.6561671	56.4	-0.7240515	56.4	-0.6717371	56.4	-0.6622512	56.4	-0.6637727	56.4	-0.6263447	56.4	-0.6993114	56.4	-0.6438512	56.4	-0.5995511	56.4	-0.6451531	56.4	-0.6031298	56.4	-0.5915849	56.4	-0.588624
56.6	-0.6745137	56.6	-0.7525128	56.6	-0.6783278	56.6	-0.6372559	56.6	-0.7106513	56.6	-0.6606951	56.6	-0.6494217	56.6	-0.6476038	56.6	-0.6049544	56.6	-0.685725	56.6	-0.6185889	56.6	-0.5928667	56.6	-0.6227924	56.6	-0.5886254	56.6	-0.5782238	56.6	-0.5755103
56.8	-0.6626636	56.8	-0.737022	56.8	-0.6604378	56.8	-0.6278522	56.8	-0.6934706	56.8	-0.6425967	56.8	-0.6358576	56.8	-0.6368108	56.8	-0.5941862	56.8	-0.6642033	56.8	-0.6114504	56.8	-0.5706488	56.8	-0.6049941	56.8	-0.5730236	56.8	-0.5656154	56.8	-0.5602828
57	-0.6501845	57	-0.7189023	57	-0.6576011	57	-0.6181089	57	-0.6847612	57	-0.6363107	57	-0.6238446	57	-0.6208357	57	-0.5792926	57	-0.6514251	57	-0.5938942	57	-0.5576772	57	-0.5958625	57	-0.5585706	57	-0.5478836	57	-0.5491607
57.2	-0.6352031	57.2	-0.7077534	57.2	-0.6359343	57.2	-0.6020662	57.2	-0.6723135	57.2	-0.6210157	57.2	-0.6093163	57.2	-0.6103766	57.2	-0.5725189	57.2	-0.6392464	57.2	-0.5868741	57.2	-0.5478499	57.2	-0.5879656	57.2	-0.5478698	57.2	-0.5390359	57.2	-0.5348536
57.4	-0.6278272	57.4	-0.6985214	57.4	-0.6270113	57.4	-0.5929022	57.4	-0.6682488	57.4	-0.6085612	57.4	-0.596224	57.4	-0.5983117	57.4	-0.5637207	57.4	-0.6302157	57.4	-0.5727941	57.4	-0.5335652	57.4	-0.5774426	57.4	-0.5343298	57.4	-0.5300168	57.4	-0.5245288
57.6	-0.618857	57.6	-0.6916505	57.6	-0.6137623	57.6	-0.5817897	57.6	-0.6512081	57.6	-0.5965672	57.6	-0.587832	57.6	-0.5920676	57.6	-0.5512839	57.6	-0.6242749	57.6	-0.5631338	57.6	-0.5283327	57.6	-0.5662748	57.6	-0.5328552	57.6	-0.5165851	57.6	-0.5175466
57.8	-0.6055457	57.8	-0.6821347	57.8	-0.6075476	57.8	-0.5749505	57.8	-0.6405775	57.8	-0.5897976	57.8	-0.5842459	57.8	-0.5806585	57.8	-0.5382808	57.8	-0.6128408	57.8	-0.5512735	57.8	-0.5203977	57.8	-0.557966	57.8	-0.5228856	57.8	-0.5068951	57.8	-0.5074411
58	-0.6025013	58	-0.6732056	58	-0.6022514	58	-0.566935	58	-0.6345171	58	-0.5833562	58	-0.5678524	58	-0.5728509	58	-0.531579	58	-0.6083813	58	-0.5472775	58	-0.5140234	58	-0.5470333	58	-0.5084148	58	-0.5009428	58	-0.4959024
58.2	-0.5902628	58.2	-0.6623887	58.2	-0.5945923	58.2	-0.561148	58.2	-0.6296933	58.2	-0.5756247	58.2	-0.5583519	58.2	-0.5702234	58.2	-0.5287073	58.2	-0.596863	58.2	-0.537739	58.2	-0.5020937	58.2	-0.541619	58.2	-0.499509	58.2	-0.4937416	58.2	-0.4915035
58.4	-0.5890728	58.4	-0.6572661	58.4	-0.5863116	58.4	-0.547969	58.4	-0.6249476	58.4	-0.5604566	58.4	-0.5566388	58.4	-0.5602284	58.4	-0.5182498	58.4	-0.5876296	58.4	-0.5297241	58.4	-0.4936483	58.4	-0.5315976	58.4	-0.4893522	58.4	-0.4819045	58.4	-0.4860243
58.6	-0.5738811	58.6	-0.6485181	58.6	-0.5789973	58.6	-0.5454586	58.6	-0.6151724	58.6	-0.5596988	58.6	-0.5489801	58.6	-0.5499998	58.6	-0.517792	58.6	-0.5821394	58.6	-0.5210866	58.6	-0.4905427	58.6	-0.5268929	58.6	-0.487435	58.6	-0.4767472	58.6	-0.4743333
58.8	-0.5739292	58.8	-0.6460469	58.8	-0.5701697	58.8	-0.5389415	58.8	-0.6075197	58.8	-0.5543806	58.8	-0.5390707	58.8	-0.5459373	58.8	-0.501385	58.8	-0.5747581	58.8	-0.5126056	58.8	-0.4817511	58.8	-0.523285	58.8	-0.4775237	58.8	-0.4678189	58.8	-0.4713154
59	-0.5620928	59	-0.6384438	59	-0.5675899	59	-0.5289506	59	-0.5987931	59	-0.5502903	59	-0.5393867	59	-0.5361624	59	-0.4998531	59	-0.5721117	59	-0.5134573	59	-0.469856	59	-0.5166128	59	-0.4729184	59	-0.4663067	59	-0.4661485
59.2	-0.5586117	59.2	-0.6332752	59.2	-0.5547846	59.2	-0.5258546	59.2	-0.5946447	59.2	-0.5410479	59.2	-0.5359396	59.2	-0.5306617	59.2	-0.4925783	59.2	-0.5675198	59.2	-0.5044492	59.2	-0.4711034	59.2	-0.5069991	59.2	-0.4686436	59.2	-0.4583926	59.2	-0.4595832
59.4	-0.5528823	59.4	-0.6252312	59.4	-0.5533937	59.4	-0.5203854	59.4	-0.5885293	59.4	-0.533321	59.4	-0.5242816	59.4	-0.528961	59.4	-0.4875944	59.4	-0.5577908	59.4	-0.5012949	59.4	-0.4618837	59.4	-0.5048462	59.4	-0.459042	59.4	-0.4527595	59.4	-0.4537123
59.6	-0.5480389	59.6	-0.6209952	59.6	-0.5510442	59.6	-0.5131654	59.6	-0.5820693	59.6	-0.5332657	59.6	-0.5270247	59.6	-0.5261117	59.6	-0.485053	59.6	-0.5582349	59.6	-0.4997498	59.6	-0.4584303	59.6	-0.5004898	59.6	-0.458053	59.6	-0.4517684	59.6	-0.4536419
59.8	-0.5445812	59.8	-0.6192826	59.8	-0.5454945	59.8	-0.5126703	59.8	-0.5826287	59.8	-0.5261377	59.8	-0.5205742	59.8	-0.5201919	59.8	-0.4811301	59.8	-0.552072	59.8	-0.4937395	59.8	-0.4556668	59.8	-0.4936315	59.8	-0.4541741	59.8	-0.4461477	59.8	-0.4501841
60	-0.4672737	60	-0.5409172	60	-0.4702864	60	-0.4403338	60	-0.5108079	60	-0.4523669	60	-0.4488203	60	-0.4530838	60	-0.409428	60	-0.4785544	60	-0.423019	60	-0.3930817	60	-0.4346409	60	-0.3908696	60	-0.3882854	60	-0.386662
60.2	-0.4583979	60.2	-0.5319594	60.2	-0.4635884	60.2	-0.4363179	60.2	-0.5043577	60.2	-0.4525168	60.2	-0.4434899	60.2	-0.443802	60.2	-0.4093505	60.2	-0.4744146	60.2	-0.4206186	60.2	-0.3875284	60.2	-0.4352012	60.2	-0.3921546	60.2	-0.38603	60.2	-0.3834779
60.4	-0.4616856	60.4	-0.5332896	60.4	-0.4621159	60.4	-0.4316704	60.4	-0.5032662	60.4	-0.4473841	60.4	-0.4399566	60.4	-0.442739	60.4	-0.4064665	60.4	-0.4747843	60.4	-0.4196714	60.4	-0.385237	60.4	-0.4331806	60.4	-0.3890671	60.4	-0.379913	60.4	-0.3814849
60.6	-0.4587574	60.6	-0.5288836	60.6	-0.460818	60.6	-0.427999	60.6	-0.5043635	60.6	-0.443495	60.6	-0.4402814	60.6	-0.4452978	60.6	-0.4045623	60.6	-0.4702805	60.6	-0.4192149	60.6	-0.3869801	60.6	-0.4290856	60.6	-0.3863974	60.6	-0.3829933	60.6	-0.3755834
60.8	-0.4566231	60.8	-0.5242535	60.8	-0.4522903	60.8	-0.4246442	60.8	-0.4969769	60.8	-0.4373392	60.8	-0.4352159	60.8	-0.4388604	60.8	-0.4016697	60.8	-0.4670945	60.8	-0.4099104	60.8	-0.3819454	60.8	-0.4257229	60.8	-0.3817334	60.8	-0.3760404	60.8	-0.3759387
61	-0.4492899	61	-0.5249951	61	-0.4518876	61	-0.4254431	61	-0.493393	61	-0.4364848	61	-0.432651	61	-0.4377559	61	-0.4002558	61	-0.4597456	61	-0.4145178	61	-0.3781078	61	-0.4229782	61	-0.3804315	61	-0.3767657	61	-0.3749566
61.2	-0.4472475	61.2	-0.5180876	61.2	-0.4501756	61.2	-0.4238993	61.2	-0.4911455	61.2	-0.4367796	61.2	-0.4343826	61.2	-0.4330192	61.2	-0.3948999	61.2	-0.4623809	61.2	-0.4080281	61.2	-0.3755339	61.2	-0.4227433	61.2	-0.3767499	61.2	-0.368787	61.2	-0.3664782
61.4	-0.4484241	61.4	-0.5164719	61.4	-0.4457906	61.4	-0.417762	61.4	-0.4918064	61.4	-0.4317125	61.4	-0.4251702	61.4	-0.4287352	61.4	-0.3922389	61.4	-0.4636779	61.4	-0.4109351	61.4	-0.3727239	61.4	-0.4205937	61.4	-0.3738361	61.4	-0.3675935	61.4	-0.3675644
61.6	-0.4457178	61.6	-0.5181111	61.6	-0.4433857	61.6	-0.4179632	61.6	-0.491868	61.6	-0.4308819	61.6	-0.4237518	61.6	-0.4256963	61.6	-0.3922985	61.6	-0.4597008	61.6	-0.406825	61.6	-0.3700183	61.6	-0.4161608	61.6	-0.3687247	61.6	-0.3700865	61.6	-0.3723949
61.8	-0.4409724	61.8	-0.5126147	61.8	-0.4425927	61.8	-0.4123394	61.8	-0.4902792	61.8	-0.4299263	61.8	-0.4216235	61.8	-0.4252602	61.8	-0.384103	61.8	-0.4530778	61.8	-0.4024937	61.8	-0.370366	61.8	-0.4159935	61.8	-0.368681	61.8	-0.3684587	61.8	-0.3676902
62	-0.439234	62	-0.5095716	62	-0.4363787	62	-0.4153161	62	-0.4851274	62	-0.423217	62	-0.4211353	62	-0.4256501	62	-0.3926115	62	-0.4559964	62	-0.3977761	62	-0.3704731	62	-0.4128592	62	-0.3726391	62	-0.363127	62	-0.3651477
62.2	-0.4365254	62.2	-0.5097138	62.2	-0.4421628	62.2	-0.4105799	62.2	-0.4824107	62.2	-0.4280537	62.2	-0.4201317	62.2	-0.4203054	62.2	-0.3830305	62.2	-0.4553092	62.2	-0.3956084	62.2	-0.3689346	62.2	-0.4155036	62.2	-0.3666588	62.2	-0.3653106	62.2	-0.3610709
62.4	-0.4310978	62.4	-0.5101063	62.4	-0.439224	62.4	-0.408797	62.4	-0.4775889	62.4	-0.4227527	62.4	-0.417871	62.4	-0.4207829	62.4	-0.3835935	62.4	-0.4540079	62.4	-0.3964055	62.4	-0.3663411	62.4	-0.4106638	62.4	-0.3635846	62.4	-0.363082	62.4	-0.3595669
62.6	-0.4327295	62.6	-0.5030901	62.6	-0.434426	62.6	-0.4049393	62.6	-0.4807516	62.6	-0.420456	62.6	-0.4159835	62.6	-0.4164799	62.6	-0.3848535	62.6	-0.4518059	62.6	-0.3941299	62.6	-0.3630829	62.6	-0.4075552	62.6	-0.3624376	62.6	-0.361048	62.6	-0.3604606
62.8	-0.4347329	62.8	-0.5022269	62.8	-0.4345469	62.8	-0.4030446	62.8	-0.4808652	62.8	-0.4199221	62.8	-0.4158116	62.8	-0.4156636	62.8	-0.3837824	62.8	-0.442736	62.8	-0.3937842	62.8	-0.3597542	62.8	-0.4036981	62.8	-0.3628174	62.8	-0.3572904	62.8	-0.3594012
63	-0.4345829	63	-0.4951608	63	-0.4299225	63	-0.4024786	63	-0.4716287	63	-0.4146509	63	-0.4125065	63	-0.4135154	63	-0.3790542	63	-0.4511155	63	-0.38968	63	-0.3594764	63	-0.4093609	63	-0.3602137	63	-0.3594021	63	-0.3574615
63.2	-0.4300205	63.2	-0.4945278	63.2	-0.433668	63.2	-0.4007996	63.2	-0.4722505	63.2	-0.4110826	63.2	-0.4071282	63.2	-0.4126462	63.2	-0.379063	63.2	-0.4417956	63.2	-0.3890688	63.2	-0.3560614	63.2	-0.4009965	63.2	-0.362582	63.2	-0.3531255	63.2	-0.354641
63.4	-0.4280038	63.4	-0.4956382	63.4	-0.4306386	63.4	-0.3973005	63.4	-0.473096	63.4	-0.4149032	63.4	-0.4053317	63.4	-0.4088906	63.4	-0.3799828	63.4	-0.4390737	63.4	-0.3874866	63.4	-0.3556371	63.4	-0.403466	63.4	-0.3557219	63.4	-0.3503049	63.4	-0.3554933
63.6	-0.4281819	63.6	-0.4936952	63.6	-0.4278285	63.6	-0.3973658	63.6	-0.464717	63.6	-0.413144	63.6	-0.4056439	63.6	-0.4103929	63.6	-0.3730808	63.6	-0.4432096	63.6	-0.3886926	63.6	-0.3508853	63.6	-0.4032307	63.6	-0.3542804	63.6	-0.344114	63.6	-0.3477817
63.8	-0.4240066	63.8	-0.4942973	63.8	-0.4246892	63.8	-0.3975414	63.8	-0.4676018	63.8	-0.4035773	63.8	-0.4063636	63.8	-0.4062369	63.8	-0.3744272	63.8	-0.4403403	63.8	-0.3844506	63.8	-0.3460973	63.8	-0.3958302	63.8	-0.3514968	63.8	-0.349601	63.8	-0.3498457
64	-0.419654	64	-0.4919834	64	-0.4257447	64	-0.3946773	64	-0.4647456	64	-0.405254	64	-0.3986529	64	-0.4062421	64	-0.3702414	64	-0.4351954	64	-0.3801092	64	-0.3504899	64	-0.3963162	64	-0.3534348	64	-0.3446252	64	-0.3411516
64.2	-0.4184491	64.2	-0.4886674	64.2	-0.4188062	64.2	-0.39378	64.2	-0.4624989	64.2	-0.406934	64.2	-0.3969901	64.2	-0.3970657	64.2	-0.3668663	64.2	-0.4382439	64.2	-0.3804735	64.2	-0.3512817	64.2	-0.3917029	64.2	-0.3548601	64.2	-0.3433657	64.2	-0.3464576
64.4	-0.4193838	64.4	-0.4896119	64.4	-0.4140902	64.4	-0.3884301	64.4	-0.4625635	64.4	-0.4043424	64.4	-0.395212	64.4	-0.3960778	64.4	-0.3633777	64.4	-0.4336455	64.4	-0.3801256	64.4	-0.3456811	64.4	-0.3920155	64.4	-0.3529454	64.4	-0.3444042	64.4	-0.3436237
64.6	-0.4144767	64.6	-0.4877521	64.6	-0.4132742	64.6	-0.3858915	64.6	-0.4623924	64.6	-0.3997915	64.6	-0.3962459	64.6	-0.3969608	64.6	-0.3667398	64.6	-0.432745	64.6	-0.377528	64.6	-0.344528	64.6	-0.3894938	64.6	-0.3455439	64.6	-0.3398395	64.6	-0.3447639
64.8	-0.4152079	64.8	-0.4865852	64.8	-0.410707	64.8	-0.3847286	64.8	-0.4590578	64.8	-0.4006297	64.8	-0.3945445	64.8	-0.3978573	64.8	-0.3608243	64.8	-0.4249994	64.8	-0.3777775	64.8	-0.3436779	64.8	-0.3889415	64.8	-0.3427434	64.8	-0.3417456	64.8	-0.3434819
65	-0.4098477	65	-0.4845752	65	-0.4099435	65	-0.3809918	65	-0.4542995	65	-0.3957484	65	-0.3981044	65	-0.3931153	65	-0.3610172	65	-0.426748	65	-0.3734702	65	-0.3388361	65	-0.390006	65	-0.3456808	65	-0.3386241	65	-0.3406183
65.2	-0.4118991	65.2	-0.4805196	65.2	-0.4100118	65.2	-0.3804904	65.2	-0.4576645	65.2	-0.3955568	65.2	-0.3904474	65.2	-0.4001485	65.2	-0.3598057	65.2	-0.4332862	65.2	-0.3729258	65.2	-0.340599	65.2	-0.3839093	65.2	-0.3413733	65.2	-0.3429136	65.2	-0.337077
65.4	-0.4082921	65.4	-0.4840016	65.4	-0.4034784	65.4	-0.3831201	65.4	-0.4561032	65.4	-0.3978834	65.4	-0.392074	65.4	-0.3935639	65.4	-0.3625036	65.4	-0.428478	65.4	-0.3681466	65.4	-0.3412423	65.4	-0.38006	65.4	-0.3384851	65.4	-0.3403428	65.4	-0.3372535
65.6	-0.4065069	65.6	-0.4809322	65.6	-0.4095508	65.6	-0.3789238	65.6	-0.4512097	65.6	-0.3951617	65.6	-0.3896389	65.6	-0.3933533	65.6	-0.3619431	65.6	-0.4239871	65.6	-0.3714723	65.6	-0.3400538	65.6	-0.3801897	65.6	-0.3389741	65.6	-0.3369725	65.6	-0.3363095
65.8	-0.4031527	65.8	-0.4763184	65.8	-0.407685	65.8	-0.3752167	65.8	-0.4497388	65.8	-0.3884096	65.8	-0.3893595	65.8	-0.3909405	65.8	-0.3578634	65.8	-0.4244457	65.8	-0.3699958	65.8	-0.3350032	65.8	-0.3828462	65.8	-0.3393162	65.8	-0.3350466	65.8	-0.3353056
66	-0.4067949	66	-0.4743856	66	-0.4042151	66	-0.3729063	66	-0.4532897	66	-0.388335	66	-0.3871756	66	-0.3863219	66	-0.3549146	66	-0.4200042	66	-0.3698334	66	-0.3376441	66	-0.3847569	66	-0.3364991	66	-0.3345847	66	-0.332288
66.2	-0.4053675	66.2	-0.4737095	66.2	-0.4015184	66.2	-0.37591	66.2	-0.450983	66.2	-0.3885441	66.2	-0.3891227	66.2	-0.3887716	66.2	-0.3519498	66.2	-0.417973	66.2	-0.3678531	66.2	-0.3359566	66.2	-0.3807832	66.2	-0.337634	66.2	-0.3277025	66.2	-0.3322801
66.4	-0.4033574	66.4	-0.4728145	66.4	-0.4049903	66.4	-0.3725008	66.4	-0.4446747	66.4	-0.3902732	66.4	-0.3885508	66.4	-0.3867467	66.4	-0.3543859	66.4	-0.4177051	66.4	-0.3652164	66.4	-0.3309305	66.4	-0.3769934	66.4	-0.3367045	66.4	-0.3271455	66.4	-0.3310647
66.6	-0.4020762	66.6	-0.4715459	66.6	-0.4006065	66.6	-0.3774065	66.6	-0.4468115	66.6	-0.3881795	66.6	-0.3832935	66.6	-0.389866	66.6	-0.3503835	66.6	-0.4158683	66.6	-0.3561199	66.6	-0.3325106	66.6	-0.3775906	66.6	-0.3327657	66.6	-0.3311677	66.6	-0.3268009
66.8	-0.3998516	66.8	-0.4704297	66.8	-0.3933175	66.8	-0.3689141	66.8	-0.447571	66.8	-0.3828471	66.8	-0.3839649	66.8	-0.3840375	66.8	-0.3545861	66.8	-0.4184965	66.8	-0.367445	66.8	-0.3297961	66.8	-0.3747701	66.8	-0.3340469	66.8	-0.329717	66.8	-0.328901
67	-0.3984272	67	-0.4668927	67	-0.3986208	67	-0.3690631	67	-0.4439767	67	-0.3848738	67	-0.3780354	67	-0.3783107	67	-0.3510208	67	-0.4161536	67	-0.3588435	67	-0.3297685	67	-0.3774323	67	-0.3328319	67	-0.3248129	67	-0.3235843
67.2	-0.396741	67.2	-0.4669015	67.2	-0.3998019	67.2	-0.3695507	67.2	-0.4383632	67.2	-0.3757237	67.2	-0.3743271	67.2	-0.3813772	67.2	-0.3509697	67.2	-0.4159911	67.2	-0.3582282	67.2	-0.3303345	67.2	-0.3710258	67.2	-0.3322411	67.2	-0.3227418	67.2	-0.3249885
67.4	-0.3997376	67.4	-0.4648522	67.4	-0.3986354	67.4	-0.3646564	67.4	-0.4367425	67.4	-0.3806223	67.4	-0.3775665	67.4	-0.373203	67.4	-0.3467345	67.4	-0.4134249	67.4	-0.3566521	67.4	-0.3282349	67.4	-0.3714417	67.4	-0.3332461	67.4	-0.3258815	67.4	-0.3285718
67.6	-0.4009624	67.6	-0.4624815	67.6	-0.393106	67.6	-0.3662947	67.6	-0.4437973	67.6	-0.3758467	67.6	-0.3726668	67.6	-0.374902	67.6	-0.3463481	67.6	-0.4116866	67.6	-0.3594288	67.6	-0.3243197	67.6	-0.3657653	67.6	-0.3294151	67.6	-0.3248053	67.6	-0.3225848
67.8	-0.3931805	67.8	-0.4631599	67.8	-0.3900974	67.8	-0.3654941	67.8	-0.4367476	67.8	-0.3766324	67.8	-0.3722444	67.8	-0.3761469	67.8	-0.3476138	67.8	-0.4093815	67.8	-0.3583651	67.8	-0.3242124	67.8	-0.3707522	67.8	-0.3234326	67.8	-0.3241238	67.8	-0.3221575
68	-0.3899654	68	-0.4631274	68	-0.3898584	68	-0.3624398	68	-0.4335248	68	-0.3767585	68	-0.370858	68	-0.3742291	68	-0.3409296	68	-0.4092942	68	-0.3514972	68	-0.3243632	68	-0.3678403	68	-0.3217617	68	-0.3198514	68	-0.3228418
68.2	-0.3890019	68.2	-0.4611156	68.2	-0.389351	68.2	-0.3661605	68.2	-0.4364215	68.2	-0.3726051	68.2	-0.3730214	68.2	-0.3722039	68.2	-0.3411304	68.2	-0.4085317	68.2	-0.3566628	68.2	-0.3243696	68.2	-0.364139	68.2	-0.3262527	68.2	-0.3195274	68.2	-0.3177042
68.4	-0.3886109	68.4	-0.460308	68.4	-0.3863143	68.4	-0.3589134	68.4	-0.4321728	68.4	-0.375628	68.4	-0.3715529	68.4	-0.3721843	68.4	-0.340051	68.4	-0.4077342	68.4	-0.3527177	68.4	-0.3259334	68.4	-0.3633736	68.4	-0.3238527	68.4	-0.3184916	68.4	-0.3194241
68.6	-0.3924985	68.6	-0.4604144	68.6	-0.3876576	68.6	-0.3623576	68.6	-0.4317624	68.6	-0.3709896	68.6	-0.3686641	68.6	-0.3693759	68.6	-0.3407294	68.6	-0.406376	68.6	-0.3520607	68.6	-0.3193714	68.6	-0.3632143	68.6	-0.3219162	68.6	-0.3156529	68.6	-0.3171538
68.8	-0.3853266	68.8	-0.4507124	68.8	-0.3846453	68.8	-0.3589938	68.8	-0.4332899	68.8	-0.3750563	68.8	-0.3689859	68.8	-0.3748553	68.84	-0.3388029	68.84	-0.405475	68.84	-0.3482117	68.84	-0.3210735	68.84	-0.3613192	68.84	-0.3203633	68.84	-0.3128804	68.84	-0.3187242
69	-0.3912362	69	-0.4549215	69	-0.3853261	69	-0.3553105	69	-0.4332689	69	-0.3695581	69	-0.3640109	69	-0.3717412	69	-0.3394115	69	-0.4020695	69	-0.349934	69	-0.3153791	69	-0.3630357	69	-0.317056	69	-0.3152938	69	-0.313926
69.2	-0.3885759	69.2	-0.454525	69.2	-0.3882488	69.2	-0.3586766	69.2	-0.4281558	69.2	-0.3668139	69.2	-0.3686669	69.2	-0.3684132	69.2	-0.3338087	69.2	-0.402407	69.2	-0.3515009	69.2	-0.3176928	69.2	-0.3604786	69.2	-0.3204081	69.2	-0.3106404	69.2	-0.3144765
69.4	-0.3829468	69.4	-0.4558244	69.4	-0.3838031	69.4	-0.3581846	69.4	-0.4294909	69.4	-0.3717465	69.4	-0.3649832	69.4	-0.36409	69.4	-0.3351802	69.4	-0.3995693	69.4	-0.3495218	69.4	-0.3146913	69.4	-0.355416	69.4	-0.316305	69.4	-0.3135528	69.4	-0.3129478
69.6	-0.3852323	69.6	-0.4523808	69.6	-0.3800813	69.6	-0.3544511	69.6	-0.4244376	69.6	-0.3647143	69.6	-0.36034	69.6	-0.3652922	69.6	-0.3326246	69.6	-0.4047749	69.6	-0.347039	69.6	-0.3113908	69.6	-0.360437	69.6	-0.3182522	69.6	-0.3087512	69.6	-0.3126578
69.8	-0.3837274	69.8	-0.4507393	69.8	-0.3804798	69.8	-0.3509345	69.8	-0.4228161	69.8	-0.3652336	69.8	-0.361682	69.8	-0.3614971	69.8	-0.329345	69.8	-0.3931458	69.8	-0.3470365	69.8	-0.3121178	69.8	-0.3536839	69.8	-0.3135761	69.8	-0.30736	69.8	-0.3105976
70	-0.3827016	70	-0.452651	70	-0.38072	70	-0.3523425	70	-0.4251435	70	-0.3660093	70	-0.3600156	70	-0.3656244	70	-0.3304497	70	-0.3965643	70	-0.3457886	70	-0.3127964	70	-0.3549815	70	-0.3102442	70	-0.3062482	70	-0.3111272
70.2	-0.3796258	70.2	-0.4477196	70.2	-0.3802514	70.2	-0.3526499	70.2	-0.4202996	70.2	-0.3648039	70.2	-0.3552175	70.2	-0.3662548	70.2	-0.3304124	70.2	-0.3959991	70.2	-0.3442606	70.2	-0.3083301	70.2	-0.3541395	70.2	-0.3108421	70.2	-0.3026211	70.2	-0.3078769
70.4	-0.3765859	70.4	-0.4481169	70.4	-0.3800254	70.4	-0.3507716	70.4	-0.4172583	70.4	-0.3627968	70.4	-0.3589838	70.4	-0.3618186	70.4	-0.3323379	70.4	-0.3927842	70.4	-0.3393626	70.4	-0.3141424	70.4	-0.3533587	70.4	-0.3117443	70.4	-0.3086834	70.4	-0.3076587
70.6	-0.3771287	70.6	-0.4429215	70.6	-0.3787252	70.6	-0.3448906	70.6	-0.4214467	70.6	-0.3615983	70.6	-0.3568104	70.6	-0.3592912	70.6	-0.3249338	70.6	-0.3927087	70.6	-0.3357134	70.6	-0.3054659	70.6	-0.3537959	70.6	-0.3122917	70.6	-0.3023443	70.6	-0.3084594
70.8	-0.3747095	70.8	-0.4452361	70.8	-0.37493	70.8	-0.3451114	70.8	-0.419533	70.8	-0.3599001	70.8	-0.3545828	70.8	-0.3567441	70.8	-0.3258676	70.8	-0.3966343	70.8	-0.3402968	70.8	-0.308101	70.8	-0.3517014	70.8	-0.310188	70.8	-0.3063013	70.8	-0.3054545
71	-0.3819624	71	-0.4461307	71	-0.3762792	71	-0.350446	71	-0.4173082	71	-0.3627021	71	-0.353078	71	-0.3565019	71	-0.3299341	71	-0.3876428	71	-0.3414968	71	-0.3043551	71	-0.345801	71	-0.3085858	71	-0.3068827	71	-0.3033107
71.2	-0.3720807	71.2	-0.4476342	71.2	-0.3723509	71.2	-0.3475246	71.2	-0.4107868	71.2	-0.360033	71.2	-0.3580529	71.2	-0.359427	71.2	-0.3318992	71.2	-0.39002	71.2	-0.3327829	71.2	-0.3040298	71.2	-0.3481725	71.2	-0.3095066	71.2	-0.3041847	71.2	-0.3042252
71.4	-0.3725733	71.4	-0.4403715	71.4	-0.3746842	71.4	-0.3463012	71.4	-0.41541	71.4	-0.3609604	71.4	-0.3532982	71.4	-0.3551099	71.4	-0.3240579	71.4	-0.3885291	71.4	-0.3362514	71.4	-0.3033586	71.4	-0.3451105	71.4	-0.310194	71.4	-0.3027632	71.4	-0.2983466
71.6	-0.3707279	71.6	-0.4403948	71.6	-0.3726386	71.6	-0.3438907	71.6	-0.4167978	71.6	-0.3553152	71.6	-0.3523327	71.6	-0.3536273	71.6	-0.3224266	71.6	-0.3883379	71.6	-0.3383231	71.6	-0.3005015	71.6	-0.3443794	71.6	-0.307831	71.6	-0.2976109	71.6	-0.3039306
71.8	-0.3724671	71.8	-0.4379511	71.8	-0.3687173	71.8	-0.339777	71.8	-0.4147972	71.8	-0.355003	71.8	-0.3457512	71.8	-0.349812	71.8	-0.3221671	71.8	-0.3842524	71.8	-0.3354684	71.8	-0.3019979	71.8	-0.3439349	71.8	-0.3079122	71.8	-0.2975945	71.8	-0.3013574
72	-0.3718258	72	-0.4364691	72	-0.3678069	72	-0.3409363	72	-0.4143738	72	-0.3585883	72	-0.3534696	72	-0.3510766	72	-0.3258864	72	-0.3833344	72	-0.3355782	72	-0.2995024	72	-0.342237	72	-0.3012211	72	-0.2962655	72	-0.2951015
72.2	-0.3698399	72.2	-0.4365899	72.2	-0.3677593	72.2	-0.3394549	72.2	-0.4113624	72.2	-0.3540635	72.2	-0.3483279	72.2	-0.3548043	72.2	-0.3183085	72.2	-0.3839602	72.2	-0.3329922	72.2	-0.3036049	72.2	-0.342901	72.2	-0.2995089	72.2	-0.2933714	72.2	-0.2995239
72.4	-0.368524	72.4	-0.4381716	72.4	-0.3657531	72.4	-0.3396806	72.4	-0.4117953	72.4	-0.3519475	72.4	-0.3487612	72.4	-0.347568	72.4	-0.3212203	72.4	-0.3875975	72.4	-0.3299645	72.4	-0.2966653	72.4	-0.3410091	72.4	-0.3005956	72.4	-0.2945371	72.4	-0.2980565
72.6	-0.3700256	72.6	-0.4350781	72.6	-0.3642078	72.6	-0.3347946	72.6	-0.4147587	72.6	-0.3523836	72.6	-0.3484918	72.6	-0.3485146	72.6	-0.3188592	72.6	-0.3792923	72.6	-0.3292717	72.6	-0.2990273	72.6	-0.3402611	72.6	-0.2995088	72.6	-0.2939122	72.6	-0.299933
72.8	-0.3666464	72.8	-0.4373059	72.8	-0.3644826	72.8	-0.3377882	72.8	-0.4099849	72.8	-0.3499647	72.8	-0.3455867	72.8	-0.3501323	72.8	-0.3213938	72.8	-0.3840142	72.8	-0.3282491	72.8	-0.2990406	72.8	-0.3408136	72.8	-0.3001043	72.8	-0.2947761	72.8	-0.2988533
73	-0.3664335	73	-0.4340939	73	-0.3622735	73	-0.341259	73	-0.4082501	73	-0.3520141	73	-0.3467697	73	-0.3470785	73	-0.3158116	73	-0.3838272	73	-0.3299617	73	-0.2947622	73	-0.3399686	73	-0.3018651	73	-0.2949955	73	-0.2955545
73.2	-0.366391	73.2	-0.4339702	73.2	-0.3590706	73.2	-0.3349698	73.2	-0.4022743	73.2	-0.3494061	73.2	-0.3419382	73.2	-0.3435283	73.2	-0.3193167	73.2	-0.3808016	73.2	-0.3296759	73.2	-0.2976643	73.2	-0.3349591	73.2	-0.2954754	73.2	-0.2925431	73.2	-0.2944705
73.4	-0.3620207	73.4	-0.4284443	73.4	-0.3617972	73.4	-0.3338513	73.4	-0.4079007	73.4	-0.3496194	73.4	-0.3440027	73.4	-0.3506033	73.4	-0.3169207	73.4	-0.3823639	73.4	-0.3274235	73.4	-0.2930944	73.4	-0.3390342	73.4	-0.2933454	73.4	-0.2894609	73.4	-0.2906045
73.61	-0.3598025	73.61	-0.427327	73.61	-0.3624539	73.61	-0.3344585	73.61	-0.4034826	73.61	-0.3513781	73.61	-0.3436367	73.61	-0.3444172	73.6	-0.3142398	73.6	-0.3795977	73.6	-0.3276808	73.6	-0.2959277	73.6	-0.3374168	73.6	-0.2977068	73.6	-0.2887422	73.6	-0.2944115
73.8	-0.3610888	73.8	-0.4300677	73.8	-0.3581289	73.8	-0.3316552	73.8	-0.4022536	73.8	-0.3452942	73.8	-0.3413402	73.8	-0.3470691	73.8	-0.3183588	73.8	-0.3749828	73.8	-0.3242117	73.8	-0.2950261	73.8	-0.3358321	73.8	-0.295905	73.8	-0.2882064	73.8	-0.2902839
74	-0.3620628	74	-0.4249122	74	-0.3621488	74	-0.328916	74	-0.4019058	74	-0.34307	74	-0.3460675	74	-0.3432507	74	-0.3122011	74	-0.3761536	74	-0.3248712	74	-0.2936104	74	-0.3320761	74	-0.2951052	74	-0.2890602	74	-0.286428
74.2	-0.3614576	74.2	-0.4303134	74.2	-0.3591658	74.2	-0.3324107	74.2	-0.4062523	74.2	-0.3459012	74.2	-0.3381229	74.2	-0.3380769	74.2	-0.314345	74.2	-0.3778177	74.2	-0.3218203	74.2	-0.2914639	74.2	-0.3341447	74.2	-0.2943448	74.2	-0.289179	74.2	-0.2917388
74.4	-0.3605965	74.4	-0.4245072	74.4	-0.356457	74.4	-0.3324482	74.4	-0.402894	74.4	-0.3406428	74.4	-0.3375116	74.4	-0.3443801	74.4	-0.3102929	74.4	-0.3725687	74.4	-0.3221083	74.4	-0.294356	74.4	-0.3306448	74.4	-0.2934698	74.4	-0.2890694	74.4	-0.2850819
74.6	-0.3599024	74.6	-0.4284284	74.6	-0.355319	74.6	-0.3306887	74.6	-0.403763	74.6	-0.3449536	74.6	-0.338229	74.6	-0.3424887	74.6	-0.3095363	74.6	-0.3724999	74.6	-0.3218501	74.6	-0.2910395	74.6	-0.3332948	74.6	-0.2946941	74.6	-0.2876161	74.6	-0.2905813
74.8	-0.3550342	74.8	-0.4221452	74.8	-0.3492402	74.8	-0.3263405	74.8	-0.4029784	74.8	-0.339486	74.8	-0.3369908	74.8	-0.3381823	74.8	-0.311488	74.8	-0.3753304	74.8	-0.3137712	74.8	-0.2881141	74.8	-0.3334848	74.8	-0.2909836	74.8	-0.2828405	74.8	-0.2891811
75	-0.3562392	75	-0.4253503	75	-0.3540808	75	-0.3257129	75	-0.3992074	75	-0.3375874	75	-0.3353603	75	-0.3427733	75	-0.306473	75	-0.3794526	75	-0.3206671	75	-0.2903154	75	-0.3337058	75	-0.2920898	75	-0.2840492	75	-0.2884352
75.2	-0.3513156	75.2	-0.4249111	75.2	-0.3531633	75.2	-0.3277631	75.2	-0.3973285	75.2	-0.3422767	75.2	-0.3348885	75.2	-0.3378602	75.2	-0.3130748	75.2	-0.367241	75.2	-0.3224711	75.2	-0.2896851	75.2	-0.3311001	75.2	-0.28694	75.2	-0.2860601	75.2	-0.2878763
75.4	-0.353007	75.4	-0.4214128	75.4	-0.3515936	75.4	-0.3235847	75.4	-0.3910358	75.4	-0.3374473	75.4	-0.3334093	75.4	-0.3348065	75.4	-0.3075757	75.4	-0.370551	75.4	-0.3202791	75.4	-0.2878222	75.4	-0.3244611	75.4	-0.2875234	75.4	-0.2862607	75.4	-0.2858984
75.6	-0.3517245	75.6	-0.4244855	75.6	-0.3478227	75.6	-0.3254604	75.6	-0.3902894	75.6	-0.3391322	75.6	-0.3370513	75.6	-0.3343672	75.6	-0.3068607	75.6	-0.371837	75.6	-0.3210403	75.6	-0.2794825	75.6	-0.3287513	75.6	-0.2854103	75.6	-0.2861925	75.6	-0.2853602
75.8	-0.3529451	75.8	-0.4210073	75.8	-0.3513942	75.8	-0.3244239	75.8	-0.3941656	75.8	-0.3364278	75.8	-0.3325028	75.8	-0.3326487	75.8	-0.3061765	75.8	-0.3711778	75.8	-0.316686	75.8	-0.2827382	75.8	-0.32884	75.8	-0.2875271	75.8	-0.2765129	75.8	-0.2810358
76	-0.3515232	76	-0.4203017	76	-0.3486226	76	-0.3272806	76	-0.3952983	76	-0.3404289	76	-0.3343652	76	-0.3351172	76	-0.3034446	76	-0.3628758	76	-0.3163063	76	-0.2809794	76	-0.3272133	76	-0.2872123	76	-0.2857556	76	-0.2786956
76.2	-0.3499466	76.2	-0.417536	76.2	-0.3474394	76.2	-0.3204701	76.2	-0.3910234	76.2	-0.3385725	76.2	-0.3331725	76.2	-0.3335603	76.2	-0.3033555	76.2	-0.3640558	76.2	-0.3114156	76.2	-0.2816856	76.2	-0.3280417	76.2	-0.2853378	76.2	-0.2769536	76.2	-0.2834845
76.4	-0.3512637	76.4	-0.4175555	76.4	-0.3511497	76.4	-0.3239846	76.4	-0.3934357	76.4	-0.329617	76.4	-0.3308352	76.4	-0.3306342	76.4	-0.3014367	76.4	-0.3681631	76.4	-0.3168951	76.4	-0.2824538	76.4	-0.3241334	76.4	-0.2802168	76.4	-0.2825963	76.4	-0.2776812
76.6	-0.351104	76.6	-0.4150731	76.6	-0.3500998	76.6	-0.3231363	76.6	-0.3928554	76.6	-0.3292101	76.6	-0.3298452	76.6	-0.3320322	76.6	-0.3024575	76.6	-0.3630435	76.6	-0.3115778	76.6	-0.2851238	76.6	-0.3239388	76.6	-0.2862972	76.6	-0.2783769	76.6	-0.2826891
76.8	-0.3507046	76.8	-0.4166386	76.8	-0.3455515	76.8	-0.3186907	76.8	-0.3929792	76.8	-0.3361922	76.8	-0.3327802	76.8	-0.3340616	76.8	-0.3021565	76.8	-0.365251	76.8	-0.3139319	76.8	-0.2853661	76.8	-0.3208513	76.8	-0.280035	76.8	-0.2769865	76.8	-0.2783622
77	-0.3434072	77	-0.4184057	77	-0.3470376	77	-0.3154562	77	-0.3890171	77	-0.3319058	77	-0.3269511	77	-0.3282857	77	-0.2988862	77	-0.364887	77	-0.3081782	77	-0.2812688	77	-0.3269736	77	-0.2820039	77	-0.2772594	77	-0.2763631
77.2	-0.3468418	77.2	-0.4165834	77.2	-0.3411768	77.2	-0.3156533	77.2	-0.3883474	77.2	-0.3338774	77.2	-0.3282159	77.2	-0.3297701	77.2	-0.2980802	77.2	-0.3607763	77.2	-0.3105127	77.2	-0.2818569	77.2	-0.3240236	77.2	-0.280787	77.2	-0.2797195	77.2	-0.2750624
77.4	-0.3447887	77.4	-0.418484	77.4	-0.3430524	77.4	-0.3165936	77.4	-0.3883155	77.4	-0.3326239	77.4	-0.3293554	77.4	-0.332579	77.41	-0.2983225	77.41	-0.3613796	77.41	-0.3071995	77.41	-0.2815693	77.41	-0.3182557	77.41	-0.2812377	77.41	-0.2726695	77.41	-0.2774642
77.6	-0.3443719	77.6	-0.4119387	77.6	-0.3394939	77.6	-0.3150517	77.6	-0.3846262	77.6	-0.3360416	77.6	-0.3283285	77.6	-0.3261227	77.6	-0.3033831	77.6	-0.3610655	77.6	-0.3081519	77.6	-0.2768586	77.6	-0.3155713	77.6	-0.2815348	77.6	-0.2758687	77.6	-0.2822366
77.8	-0.3457153	77.8	-0.4141617	77.8	-0.3446539	77.8	-0.3122906	77.8	-0.3864233	77.8	-0.3278482	77.8	-0.3224337	77.8	-0.3300374	77.8	-0.3018491	77.8	-0.3573202	77.8	-0.3092339	77.8	-0.2756114	77.8	-0.3186233	77.8	-0.2779788	77.8	-0.2717999	77.8	-0.2763114
78	-0.3407641	78	-0.4109328	78	-0.3407192	78	-0.3142469	78	-0.3823416	78	-0.3275587	78	-0.3232853	78	-0.3289292	78	-0.2967302	78	-0.3556783	78	-0.3052845	78	-0.2764746	78	-0.3184	78	-0.2784211	78	-0.2748924	78	-0.2785583
78.2	-0.3411255	78.2	-0.4106594	78.2	-0.3375817	78.2	-0.316911	78.2	-0.3841881	78.2	-0.3284747	78.2	-0.3217216	78.2	-0.3259789	78.2	-0.2950004	78.2	-0.3596027	78.2	-0.3094014	78.2	-0.2801814	78.2	-0.3223931	78.2	-0.2752215	78.2	-0.2761269	78.2	-0.270299
78.4	-0.3419389	78.4	-0.4136143	78.4	-0.338007	78.4	-0.3141516	78.4	-0.3861308	78.4	-0.3291574	78.4	-0.3226577	78.4	-0.325145	78.4	-0.2948705	78.4	-0.3559259	78.4	-0.3077422	78.4	-0.2775091	78.4	-0.3166903	78.4	-0.2752728	78.4	-0.2744403	78.4	-0.272644
78.6	-0.3415881	78.6	-0.4056652	78.6	-0.338877	78.6	-0.3155822	78.6	-0.3816223	78.6	-0.3272894	78.6	-0.3228405	78.6	-0.3246695	78.6	-0.2943139	78.6	-0.3563815	78.6	-0.3078139	78.6	-0.2743294	78.6	-0.3166376	78.6	-0.2735284	78.6	-0.2684112	78.6	-0.2715722
78.8	-0.3421688	78.8	-0.4096746	78.8	-0.3373331	78.8	-0.3111064	78.8	-0.3863867	78.8	-0.3273246	78.8	-0.3219702	78.8	-0.3241266	78.8	-0.295092	78.8	-0.3611639	78.8	-0.3036011	78.8	-0.2761994	78.8	-0.3186628	78.8	-0.2752827	78.8	-0.2695463	78.8	-0.271952
79	-0.3389243	79	-0.4072557	79	-0.3383612	79	-0.308138	79	-0.3835005	79	-0.3260801	79	-0.315968	79	-0.3245567	79	-0.2979016	79	-0.3565314	79	-0.3036078	79	-0.2714811	79	-0.3144051	79	-0.2749109	79	-0.2689247	79	-0.2712565
79.2	-0.344557	79.2	-0.4080774	79.2	-0.3360289	79.2	-0.3079996	79.2	-0.379649	79.2	-0.3217106	79.2	-0.3207102	79.2	-0.3202858	79.2	-0.2905429	79.2	-0.3539529	79.2	-0.3039293	79.2	-0.2728595	79.2	-0.3145362	79.2	-0.2739245	79.2	-0.2681238	79.2	-0.2717488
79.4	-0.3377526	79.4	-0.4075818	79.4	-0.3351278	79.4	-0.309503	79.4	-0.3802236	79.4	-0.3233949	79.4	-0.3158811	79.4	-0.318799	79.4	-0.2961369	79.4	-0.3598382	79.4	-0.3029575	79.4	-0.2724269	79.4	-0.3132587	79.4	-0.2728653	79.4	-0.2705892	79.4	-0.2681193
79.6	-0.3346545	79.6	-0.4050961	79.6	-0.3336926	79.6	-0.3076556	79.6	-0.3825143	79.6	-0.3193537	79.6	-0.3166806	79.6	-0.3225861	79.6	-0.2887323	79.6	-0.3544308	79.6	-0.3044407	79.6	-0.2701335	79.6	-0.3161996	79.6	-0.2738244	79.6	-0.2708062	79.6	-0.2708371
79.8	-0.3369536	79.8	-0.4119454	79.8	-0.3346051	79.8	-0.3080533	79.8	-0.3841462	79.8	-0.3202252	79.8	-0.3241599	79.8	-0.316781	79.8	-0.2924339	79.8	-0.3509119	79.8	-0.3017648	79.8	-0.2690026	79.8	-0.3121038	79.8	-0.2701066	79.8	-0.2652064	79.8	-0.2749892
80	-0.3353695	80	-0.4078611	80	-0.3333928	80	-0.311142	80	-0.3775511	80	-0.3167069	80	-0.3179666	80	-0.3143029	80	-0.2885568	80	-0.3571443	80	-0.2976015	80	-0.2701878	80	-0.3090178	80	-0.2724111	80	-0.2673692	80	-0.2654225
80.2	-0.3364834	80.2	-0.405262	80.2	-0.3310748	80.2	-0.3060685	80.2	-0.3783422	80.2	-0.3206254	80.2	-0.3188049	80.2	-0.3181726	80.2	-0.2870433	80.2	-0.3488773	80.2	-0.3000904	80.2	-0.2710013	80.2	-0.3102816	80.2	-0.2694328	80.2	-0.2659455	80.2	-0.2669128
80.4	-0.332865	80.4	-0.4026684	80.4	-0.3299114	80.4	-0.3144003	80.4	-0.3787288	80.4	-0.3231532	80.4	-0.3156717	80.4	-0.3206455	80.4	-0.2871889	80.4	-0.3538594	80.4	-0.3012922	80.4	-0.2667982	80.4	-0.3072193	80.4	-0.2685628	80.4	-0.2674369	80.4	-0.2695498
80.6	-0.3334813	80.6	-0.4028335	80.6	-0.3272626	80.6	-0.3019503	80.6	-0.3766364	80.6	-0.3176265	80.6	-0.3175518	80.6	-0.3168005	80.6	-0.2888774	80.6	-0.3494539	80.6	-0.2978352	80.6	-0.269691	80.6	-0.3096717	80.6	-0.2649837	80.6	-0.2652388	80.6	-0.2639518
80.8	-0.3369151	80.8	-0.4067341	80.8	-0.3317766	80.8	-0.3028581	80.8	-0.3779395	80.8	-0.3171269	80.8	-0.3136096	80.8	-0.3197708	80.8	-0.2891168	80.8	-0.3504358	80.8	-0.2962086	80.8	-0.2645451	80.8	-0.3081484	80.8	-0.2670517	80.8	-0.263895	80.8	-0.2639089
81	-0.3280209	81	-0.4010466	81	-0.3289692	81	-0.3087877	81	-0.3783207	81	-0.3120716	81	-0.3153106	81	-0.3137177	81	-0.2848345	81	-0.3481071	81	-0.2957139	81	-0.2681491	81	-0.3054723	81	-0.2691256	81	-0.2644739	81	-0.2629678
81.2	-0.3334057	81.2	-0.4005993	81.2	-0.3316455	81.2	-0.3011232	81.2	-0.3756959	81.2	-0.3171266	81.2	-0.3140532	81.2	-0.3180579	81.2	-0.2844248	81.2	-0.3489575	81.2	-0.2961721	81.2	-0.2686965	81.2	-0.306216	81.2	-0.2667729	81.2	-0.2644496	81.2	-0.2625393
81.4	-0.3347161	81.4	-0.3999726	81.4	-0.3264135	81.4	-0.3061392	81.4	-0.3756588	81.4	-0.3158582	81.4	-0.3146228	81.4	-0.3142676	81.4	-0.2840599	81.4	-0.3489412	81.4	-0.2994994	81.4	-0.2666261	81.4	-0.3064788	81.4	-0.2653212	81.4	-0.2579182	81.4	-0.2622243
81.6	-0.3320261	81.6	-0.39528	81.6	-0.3268995	81.6	-0.3031063	81.6	-0.3754474	81.6	-0.3146603	81.6	-0.3115878	81.6	-0.3139422	81.6	-0.2862369	81.6	-0.343451	81.6	-0.295493	81.6	-0.2672526	81.6	-0.3067024	81.6	-0.2637775	81.6	-0.2609987	81.6	-0.2659473
81.8	-0.3337576	81.8	-0.3946285	81.8	-0.327979	81.8	-0.3012497	81.8	-0.3715791	81.8	-0.3143029	81.8	-0.313782	81.8	-0.3137564	81.8	-0.280895	81.8	-0.3425865	81.8	-0.2890582	81.8	-0.2650923	81.8	-0.302499	81.8	-0.2612334	81.8	-0.2635614	81.8	-0.26155
82	-0.3297747	82	-0.3990551	82	-0.3250263	82	-0.301559	82	-0.3718998	82	-0.3125359	82	-0.3093969	82	-0.3088893	82	-0.2826749	82	-0.3498025	82	-0.2945225	82	-0.2597022	82	-0.3055015	82	-0.2639854	82	-0.2560358	82	-0.2602259
82.2	-0.3280843	82.2	-0.3961305	82.2	-0.3245983	82.2	-0.2986382	82.2	-0.3730962	82.2	-0.3158435	82.2	-0.3079917	82.2	-0.3116006	82.2	-0.2829638	82.2	-0.339039	82.2	-0.291726	82.2	-0.2691976	82.2	-0.301416	82.2	-0.2613097	82.2	-0.2588912	82.2	-0.2609459
82.4	-0.3283557	82.4	-0.3967451	82.4	-0.3259254	82.4	-0.3032908	82.4	-0.3683566	82.4	-0.312562	82.4	-0.3070313	82.4	-0.3132026	82.4	-0.2821336	82.4	-0.3415317	82.4	-0.2936152	82.4	-0.2608719	82.4	-0.3038831	82.4	-0.2642273	82.4	-0.258833	82.4	-0.2646959
82.6	-0.3272085	82.6	-0.3925716	82.6	-0.3250281	82.6	-0.2988014	82.6	-0.3680936	82.6	-0.3109477	82.6	-0.3097014	82.6	-0.3082348	82.6	-0.286872	82.6	-0.3423357	82.6	-0.2947356	82.6	-0.2607982	82.6	-0.3042201	82.6	-0.2643114	82.6	-0.2568288	82.6	-0.2621985
82.8	-0.3283328	82.8	-0.3921135	82.8	-0.3213023	82.8	-0.3000102	82.8	-0.3703079	82.8	-0.3091638	82.8	-0.3066327	82.8	-0.3073494	82.8	-0.2848647	82.8	-0.3467071	82.8	-0.2920262	82.8	-0.2604309	82.8	-0.3011476	82.8	-0.2639702	82.8	-0.257517	82.8	-0.2571017
83	-0.3291544	83	-0.3962581	83	-0.3199968	83	-0.2966529	83	-0.3647089	83	-0.308878	83	-0.3062329	83	-0.3056472	83	-0.2806652	83	-0.3371634	83	-0.2866872	83	-0.2591175	83	-0.3025157	83	-0.2621819	83	-0.2587348	83	-0.2563578
83.2	-0.3317019	83.2	-0.3955921	83.2	-0.3195744	83.2	-0.2972228	83.2	-0.3659465	83.2	-0.3070953	83.2	-0.3055166	83.2	-0.3106237	83.2	-0.2775099	83.2	-0.3404475	83.2	-0.2879852	83.2	-0.2576846	83.2	-0.2988546	83.2	-0.2637591	83.2	-0.2564753	83.2	-0.2608203
83.4	-0.3287855	83.4	-0.3962899	83.4	-0.3215192	83.4	-0.2983559	83.4	-0.3717745	83.4	-0.3076219	83.4	-0.3048776	83.4	-0.3065965	83.4	-0.2800195	83.4	-0.3407962	83.4	-0.2857423	83.4	-0.2593454	83.4	-0.2978064	83.4	-0.2608075	83.4	-0.2544004	83.4	-0.2572482
83.6	-0.3271078	83.6	-0.3922484	83.6	-0.3225634	83.6	-0.2996989	83.6	-0.365138	83.6	-0.3088187	83.6	-0.3084671	83.6	-0.3066504	83.6	-0.2795551	83.6	-0.3436784	83.6	-0.2840298	83.6	-0.25875	83.6	-0.2957514	83.6	-0.2632081	83.6	-0.2535904	83.6	-0.2567878
83.8	-0.3298061	83.8	-0.3915366	83.8	-0.3251501	83.8	-0.2983522	83.8	-0.3622088	83.8	-0.3082284	83.8	-0.3011952	83.8	-0.3074229	83.8	-0.2773245	83.8	-0.3380875	83.8	-0.2896743	83.8	-0.2563035	83.8	-0.3013684	83.8	-0.2547438	83.8	-0.2539699	83.8	-0.2557218
84	-0.3215759	84	-0.3933508	84	-0.3190508	84	-0.2982784	84	-0.3641205	84	-0.3094535	84	-0.3021222	84	-0.3057429	84	-0.2817641	84	-0.3386798	84	-0.2873399	84	-0.2546291	84	-0.2988608	84	-0.260134	84	-0.2565558	84	-0.2548557
84.2	-0.3252285	84.2	-0.393105	84.2	-0.3151681	84.2	-0.2948264	84.2	-0.3678442	84.2	-0.3078623	84.2	-0.3030315	84.2	-0.305236	84.2	-0.2761609	84.2	-0.3381098	84.2	-0.2877827	84.2	-0.2587881	84.2	-0.2978952	84.2	-0.2588586	84.2	-0.2503276	84.2	-0.2581562
84.4	-0.3243872	84.4	-0.3865458	84.4	-0.3204695	84.4	-0.2927461	84.4	-0.3624585	84.4	-0.3067779	84.4	-0.305461	84.4	-0.3036076	84.4	-0.2747499	84.4	-0.3411587	84.4	-0.2835453	84.4	-0.2559306	84.4	-0.2966329	84.4	-0.2555025	84.4	-0.2539204	84.4	-0.2572071
84.6	-0.3214944	84.6	-0.3886014	84.6	-0.3194483	84.6	-0.2934753	84.6	-0.3669141	84.6	-0.3057146	84.6	-0.3064408	84.6	-0.3035516	84.6	-0.2788933	84.6	-0.3352311	84.6	-0.286012	84.6	-0.2512642	84.6	-0.2976902	84.6	-0.2560441	84.6	-0.247599	84.6	-0.2581181
84.8	-0.3259836	84.8	-0.3854771	84.8	-0.3162436	84.8	-0.2939872	84.8	-0.362055	84.8	-0.304575	84.8	-0.3003018	84.8	-0.3032475	84.8	-0.2739846	84.8	-0.3343935	84.8	-0.2863521	84.8	-0.2547752	84.8	-0.2962368	84.8	-0.2599356	84.8	-0.2497664	84.8	-0.2547497
85	-0.3211388	85	-0.3850319	85	-0.319673	85	-0.292629	85	-0.3586518	85	-0.3050353	85	-0.2997769	85	-0.3034746	85	-0.276408	85	-0.3325158	85	-0.2821202	85	-0.2560105	85	-0.2901118	85	-0.2540716	85	-0.2486061	85	-0.2578371
85.2	-0.3162305	85.2	-0.3924869	85.2	-0.3138635	85.2	-0.2924789	85.2	-0.3631053	85.2	-0.3023822	85.2	-0.2963606	85.2	-0.3055936	85.2	-0.2744217	85.2	-0.3337786	85.2	-0.2823073	85.2	-0.2513278	85.2	-0.2942993	85.2	-0.254338	85.2	-0.2478816	85.2	-0.254927
85.4	-0.3166855	85.4	-0.3887562	85.4	-0.3179275	85.4	-0.2929108	85.4	-0.3638277	85.4	-0.3037452	85.4	-0.2980088	85.4	-0.3028052	85.4	-0.2735808	85.4	-0.3349984	85.4	-0.2807752	85.4	-0.2481532	85.4	-0.2915591	85.4	-0.2546527	85.4	-0.2471342	85.4	-0.2497572
85.6	-0.3214541	85.6	-0.3856263	85.6	-0.3195679	85.6	-0.2895596	85.6	-0.3590619	85.6	-0.3041937	85.6	-0.2959525	85.6	-0.3010229	85.6	-0.2736764	85.6	-0.3321114	85.6	-0.2810745	85.6	-0.2524662	85.6	-0.2911435	85.6	-0.2557249	85.6	-0.247099	85.6	-0.2526676
85.8	-0.3183585	85.8	-0.394014	85.8	-0.3163228	85.8	-0.2920428	85.8	-0.3610778	85.8	-0.3013086	85.8	-0.2982637	85.8	-0.2991818	85.8	-0.2708307	85.8	-0.3346858	85.8	-0.2808322	85.8	-0.2493937	85.8	-0.2911413	85.8	-0.2555045	85.8	-0.248642	85.8	-0.2515938
86	-0.3173758	86	-0.3863079	86	-0.3137221	86	-0.2873017	86	-0.3584547	86	-0.3011132	86	-0.3007392	86	-0.2979132	86	-0.2673205	86	-0.3314556	86	-0.285561	86	-0.2504091	86	-0.2948914	86	-0.2545247	86	-0.2469565	86	-0.2525298
86.2	-0.3181093	86.2	-0.3889224	86.2	-0.3127231	86.2	-0.2877946	86.2	-0.3563932	86.2	-0.297717	86.2	-0.2983267	86.2	-0.2987594	86.2	-0.2704943	86.2	-0.3345077	86.2	-0.2835252	86.2	-0.2502044	86.2	-0.2915323	86.2	-0.2494356	86.2	-0.2402761	86.2	-0.2496775
86.4	-0.3152336	86.4	-0.3823915	86.4	-0.3169023	86.4	-0.2847682	86.4	-0.3541665	86.4	-0.2989036	86.4	-0.2967413	86.4	-0.2951669	86.4	-0.2693636	86.4	-0.3278092	86.4	-0.2807015	86.4	-0.248055	86.4	-0.2925849	86.4	-0.2502113	86.4	-0.2416563	86.4	-0.2520323
86.6	-0.3117831	86.6	-0.3848774	86.6	-0.3082386	86.6	-0.286678	86.6	-0.3519926	86.6	-0.3007652	86.6	-0.2935845	86.6	-0.295958	86.6	-0.2677964	86.6	-0.3287278	86.6	-0.2820821	86.6	-0.2481807	86.6	-0.2854602	86.6	-0.2498981	86.6	-0.2451831	86.6	-0.2480316
86.8	-0.3165457	86.8	-0.3822484	86.8	-0.3083277	86.8	-0.2903801	86.8	-0.3567795	86.8	-0.303347	86.8	-0.2946633	86.8	-0.2976494	86.8	-0.2700584	86.8	-0.332793	86.8	-0.2810239	86.8	-0.2488934	86.8	-0.2955652	86.8	-0.2522118	86.8	-0.2428485	86.8	-0.2509965
87	-0.3141426	87	-0.3817385	87	-0.3149134	87	-0.2866815	87	-0.3556485	87	-0.3031106	87	-0.2934107	87	-0.3001206	87	-0.2683781	87	-0.3326107	87	-0.2782857	87	-0.2488785	87	-0.2865991	87	-0.2464168	87	-0.2455653	87	-0.2469551
87.2	-0.3140346	87.2	-0.382733	87.2	-0.3089663	87.2	-0.2874801	87.2	-0.3529306	87.2	-0.2947965	87.2	-0.2948844	87.2	-0.2942317	87.2	-0.2705012	87.2	-0.3269928	87.2	-0.2766797	87.2	-0.2470558	87.2	-0.2866688	87.2	-0.2500608	87.2	-0.2417368	87.2	-0.2444661
87.4	-0.3092372	87.4	-0.3843558	87.4	-0.3122911	87.4	-0.2898981	87.4	-0.354756	87.4	-0.2950331	87.4	-0.2966283	87.4	-0.2918884	87.4	-0.2654818	87.4	-0.3287907	87.4	-0.2796056	87.4	-0.2452024	87.4	-0.2853094	87.4	-0.2454217	87.4	-0.2408791	87.4	-0.2436648
87.6	-0.3123709	87.6	-0.3789569	87.6	-0.308116	87.6	-0.2852465	87.6	-0.3507179	87.6	-0.2973711	87.6	-0.2896664	87.6	-0.3001293	87.6	-0.266684	87.6	-0.3298261	87.6	-0.2746032	87.6	-0.248645	87.6	-0.2858471	87.6	-0.2460013	87.6	-0.2395583	87.6	-0.24654
87.8	-0.3122	87.8	-0.3863335	87.8	-0.3063129	87.8	-0.2886286	87.8	-0.3516829	87.8	-0.2888453	87.8	-0.29345	87.8	-0.2958204	87.8	-0.2664708	87.8	-0.3244207	87.8	-0.2738839	87.8	-0.2471036	87.8	-0.2817571	87.8	-0.2465897	87.8	-0.2428589	87.8	-0.2452035
88	-0.3142735	88	-0.3750044	88	-0.3073281	88	-0.2845099	88	-0.3523062	88	-0.2991906	88	-0.2928753	88	-0.2920708	88	-0.265874	88	-0.3290762	88	-0.2696582	88	-0.2456028	88	-0.2814353	88	-0.2454435	88	-0.240113	88	-0.2459195
88.2	-0.3151025	88.2	-0.3797903	88.2	-0.3076113	88.2	-0.2890738	88.2	-0.3579211	88.2	-0.2986004	88.2	-0.2907295	88.2	-0.2959837	88.2	-0.2646689	88.2	-0.3261579	88.2	-0.2757518	88.2	-0.2474987	88.2	-0.2855282	88.2	-0.2457116	88.2	-0.2407569	88.2	-0.2445958
88.4	-0.3109103	88.4	-0.3767149	88.4	-0.3027347	88.4	-0.2789827	88.4	-0.3527943	88.4	-0.2981918	88.4	-0.2907452	88.4	-0.2969453	88.4	-0.2652786	88.4	-0.3228489	88.4	-0.2742424	88.4	-0.2442185	88.4	-0.2863531	88.4	-0.2460273	88.4	-0.2399318	88.4	-0.2448547
88.6	-0.3151331	88.6	-0.3785569	88.6	-0.3038921	88.6	-0.2842975	88.6	-0.3512888	88.6	-0.2949244	88.6	-0.2901447	88.6	-0.2966743	88.6	-0.2608603	88.6	-0.3251107	88.6	-0.2754203	88.6	-0.2458452	88.6	-0.2848989	88.6	-0.2459343	88.6	-0.2395074	88.6	-0.2446041
88.8	-0.3074241	88.8	-0.3796164	88.8	-0.3047439	88.8	-0.2823094	88.8	-0.345647	88.8	-0.2965481	88.8	-0.2895254	88.8	-0.2985308	88.8	-0.2628481	88.8	-0.3241704	88.8	-0.2719924	88.8	-0.244735	88.8	-0.2835274	88.8	-0.2434277	88.8	-0.238028	88.8	-0.2458682
89	-0.3093919	89	-0.3757549	89	-0.3074679	89	-0.2876174	89	-0.3529075	89	-0.2948616	89	-0.2916039	89	-0.2934439	89	-0.2605968	89	-0.3201467	89	-0.27321	89	-0.239219	89	-0.2810942	89	-0.2489204	89	-0.2386948	89	-0.2411242
89.2	-0.3086933	89.2	-0.3719249	89.2	-0.3047005	89.2	-0.2778803	89.2	-0.3521236	89.2	-0.2926603	89.2	-0.2884952	89.2	-0.2920145	89.2	-0.2584842	89.2	-0.3179195	89.2	-0.2730599	89.2	-0.2432865	89.2	-0.2840519	89.2	-0.2418355	89.2	-0.2403519	89.2	-0.2436227
89.4	-0.3073075	89.4	-0.376561	89.4	-0.3045337	89.4	-0.27905	89.4	-0.3530388	89.4	-0.2937842	89.4	-0.2882597	89.4	-0.2898915	89.4	-0.2597303	89.4	-0.3217341	89.4	-0.2723708	89.4	-0.2421251	89.4	-0.2811521	89.4	-0.2422383	89.4	-0.2351673	89.4	-0.2432767
89.6	-0.3110484	89.6	-0.3769662	89.6	-0.3014471	89.6	-0.2790267	89.6	-0.3514948	89.6	-0.2953488	89.6	-0.2886698	89.6	-0.294486	89.6	-0.2609118	89.6	-0.3252093	89.6	-0.2718811	89.6	-0.2416238	89.6	-0.2832205	89.6	-0.2409358	89.6	-0.2352072	89.6	-0.2378649
89.8	-0.309132	89.8	-0.3741802	89.8	-0.303564	89.8	-0.2779863	89.8	-0.349052	89.8	-0.2923358	89.8	-0.2887509	89.8	-0.290968	89.8	-0.2607416	89.8	-0.3227773	89.8	-0.272767	89.8	-0.2405074	89.8	-0.2821589	89.8	-0.2397914	89.8	-0.2346152	89.8	-0.2409423
90	-0.324888	90	-0.3859797	90	-0.3050154	90	-0.2898554	90	-0.3593178	90	-0.3084392	90	-0.2976544	90	-0.2807914	90	-0.2611736	90	-0.3196217	90	-0.2685807	90	-0.2404639	90	-0.2797043	90	-0.2390505	90	-0.2345909	90	-0.2329675
90.2	-0.3145174	90.2	-0.3828933	90.2	-0.3001261	90.2	-0.2838852	90.2	-0.3510086	90.2	-0.2912453	90.2	-0.2859486	90.2	-0.279262	90.2	-0.2559705	90.2	-0.3175618	90.2	-0.2684664	90.2	-0.236796	90.2	-0.2761524	90.2	-0.2400068	90.2	-0.2324979	90.2	-0.2390385
90.4	-0.3121715	90.4	-0.3703592	90.4	-0.2868642	90.4	-0.271927	90.4	-0.3399861	90.4	-0.2900692	90.4	-0.274235	90.4	-0.2722135	90.4	-0.255272	90.4	-0.3178962	90.4	-0.2596669	90.4	-0.2350558	90.4	-0.2773684	90.4	-0.238702	90.4	-0.233689	90.4	-0.2385341
90.6	-0.3015431	90.6	-0.360138	90.6	-0.2773463	90.6	-0.264204	90.6	-0.3278167	90.6	-0.2811458	90.6	-0.2649882	90.6	-0.2779896	90.6	-0.2539515	90.6	-0.3145402	90.6	-0.2681356	90.6	-0.239482	90.6	-0.279791	90.6	-0.2406209	90.6	-0.2300117	90.6	-0.2391229
90.8	-0.2903978	90.8	-0.3535584	90.8	-0.2723438	90.8	-0.2594166	90.8	-0.320567	90.8	-0.2733246	90.8	-0.2561617	90.8	-0.2732061	90.8	-0.2550287	90.8	-0.3159955	90.8	-0.266255	90.8	-0.2374515	90.8	-0.2753674	90.8	-0.2404767	90.8	-0.2345279	90.8	-0.2349792
91	-0.2818559	91	-0.3440515	91	-0.2666349	91	-0.2402477	91	-0.3143812	91	-0.25931	91	-0.2478614	91	-0.2742393	91	-0.2557369	91	-0.3157911	91	-0.2601613	91	-0.2354529	91	-0.2708126	91	-0.2357809	91	-0.2325672	91	-0.2370242
91.2	-0.271156	91.2	-0.3322172	91.2	-0.2555381	91.2	-0.2391059	91.2	-0.3072925	91.2	-0.2516516	91.2	-0.2425564	91.2	-0.2763577	91.2	-0.2543701	91.2	-0.317722	91.2	-0.2588346	91.2	-0.2308422	91.2	-0.2710806	91.2	-0.2391887	91.2	-0.2305759	91.2	-0.2362403
91.4	-0.2584632	91.4	-0.3273375	91.4	-0.2492008	91.4	-0.2215945	91.4	-0.2959319	91.4	-0.2458964	91.4	-0.2284027	91.4	-0.2767002	91.4	-0.2522161	91.4	-0.317934	91.4	-0.2674603	91.4	-0.2373911	91.4	-0.2763726	91.4	-0.2342925	91.4	-0.2322255	91.4	-0.2344068
91.6	-0.2528515	91.6	-0.3151878	91.6	-0.2399776	91.6	-0.2213213	91.6	-0.2768887	91.6	-0.2347768	91.6	-0.2209919	91.6	-0.2718227	91.6	-0.2507631	91.6	-0.3096721	91.6	-0.260578	91.6	-0.2303347	91.6	-0.2728063	91.6	-0.2362783	91.6	-0.2317764	91.6	-0.2333977
91.8	-0.2421126	91.8	-0.3039795	91.8	-0.2287457	91.8	-0.2090207	91.8	-0.273459	91.8	-0.2229961	91.8	-0.2103833	91.8	-0.2739103	91.8	-0.2526806	91.8	-0.3130501	91.8	-0.2629879	91.8	-0.231361	91.8	-0.2775109	91.8	-0.2332143	91.8	-0.2232811	91.8	-0.2336684
92	-0.236546	92	-0.2957273	92	-0.2218654	92	-0.196079	92	-0.2665333	92	-0.2113647	92	-0.1990572	92	-0.2731892	92	-0.2531776	92	-0.3149436	92	-0.2609173	92	-0.2274911	92	-0.2752049	92	-0.2336168	92	-0.2240388	92	-0.230151
92.2	-0.2209831	92.2	-0.2837882	92.2	-0.2109936	92.2	-0.1895983	92.2	-0.2612248	92.2	-0.2067073	92.2	-0.1966142	92.2	-0.2717799	92.2	-0.2518976	92.2	-0.3104838	92.2	-0.261683	92.2	-0.2303457	92.2	-0.2753869	92.2	-0.2317006	92.2	-0.2281118	92.2	-0.2316485
92.4	-0.213236	92.4	-0.2739071	92.4	-0.2065367	92.4	-0.1778155	92.4	-0.2482261	92.4	-0.1940664	92.4	-0.1796286	92.4	-0.2715866	92.4	-0.2528213	92.4	-0.3117326	92.4	-0.2621745	92.4	-0.2281428	92.4	-0.26881	92.4	-0.2326263	92.4	-0.2282092	92.4	-0.233146
92.6	-0.206059	92.6	-0.2660038	92.6	-0.194128	92.6	-0.168818	92.6	-0.2354589	92.6	-0.184709	92.6	-0.1689855	92.6	-0.2713483	92.6	-0.2537332	92.6	-0.3110114	92.6	-0.257005	92.6	-0.2305253	92.6	-0.2723115	92.6	-0.2318811	92.6	-0.2247935	92.6	-0.2339235
92.8	-0.1966872	92.8	-0.2592773	92.8	-0.1881233	92.8	-0.1623601	92.8	-0.2240321	92.8	-0.1791737	92.8	-0.1606256	92.8	-0.2752062	92.8	-0.249358	92.8	-0.3092726	92.8	-0.2586637	92.8	-0.2282259	92.8	-0.267735	92.8	-0.2300843	92.8	-0.2257115	92.8	-0.2315282
93	-0.1848989	93	-0.2432097	93	-0.1778237	93	-0.1526014	93	-0.2178382	93	-0.1667361	93	-0.1500298	93	-0.2720741	93	-0.2490259	93	-0.3104286	93	-0.2592794	93	-0.2331778	93	-0.2699045	93	-0.2277477	93	-0.2238577	93	-0.2279323
93.2	-0.1789618	93.2	-0.2355265	93.2	-0.1734239	93.2	-0.1439559	93.2	-0.2166745	93.2	-0.157846	93.2	-0.1416989	93.2	-0.2697428	93.2	-0.2468404	93.2	-0.3115964	93.2	-0.2593406	93.2	-0.2281224	93.2	-0.2659471	93.2	-0.233863	93.2	-0.2217639	93.2	-0.2320351
93.4	-0.1655941	93.4	-0.2236113	93.4	-0.1597089	93.4	-0.1344312	93.4	-0.1957993	93.4	-0.1486131	93.4	-0.1304695	93.4	-0.2671071	93.4	-0.2469344	93.4	-0.315366	93.4	-0.2630276	93.4	-0.2273572	93.4	-0.2699052	93.4	-0.2317891	93.4	-0.2260037	93.4	-0.2307621
93.6	-0.1518917	93.6	-0.2174138	93.6	-0.1520788	93.6	-0.1231836	93.6	-0.1938628	93.6	-0.1378537	93.6	-0.120761	93.6	-0.2678508	93.62	-0.247621	93.62	-0.3084412	93.62	-0.2660217	93.62	-0.2251512	93.62	-0.2722027	93.62	-0.2280705	93.62	-0.2271268	93.62	-0.2295102
93.8	-0.1465388	93.8	-0.2121017	93.8	-0.1439913	93.8	-0.111564	93.8	-0.1800532	93.8	-0.1265925	93.8	-0.1148893	93.8	-0.266748	93.8	-0.2459219	93.8	-0.3082612	93.8	-0.2565661	93.8	-0.2284577	93.8	-0.2674904	93.8	-0.227938	93.8	-0.2193838	93.8	-0.2318976
94	-0.1380192	94	-0.1975417	94	-0.1382922	94	-0.1078527	94	-0.1754822	94	-0.1168569	94	-0.09764977	94	-0.2676941	94	-0.2523092	94	-0.3063994	94	-0.2617659	94	-0.2314009	94	-0.267042	94	-0.2281084	94	-0.2196974	94	-0.2350045
94.2	-0.1272654	94.2	-0.1854163	94.2	-0.1293874	94.2	-0.09649291	94.2	-0.1578269	94.2	-0.1069624	94.2	-0.0972298	94.2	-0.2659864	94.2	-0.2495429	94.2	-0.3089269	94.2	-0.2588567	94.2	-0.2260904	94.2	-0.2691247	94.2	-0.222491	94.2	-0.2243022	94.2	-0.2271279
94.4	-0.1197875	94.4	-0.1814617	94.4	-0.1228439	94.4	-0.08553227	94.4	-0.1526325	94.4	-0.09760082	94.4	-0.08178578	94.4	-0.2659612	94.4	-0.2460579	94.4	-0.3104766	94.4	-0.2583219	94.4	-0.225861	94.4	-0.2697573	94.4	-0.2258833	94.4	-0.2202476	94.4	-0.2325555
94.6	-0.111378	94.6	-0.1698028	94.6	-0.1128533	94.6	-0.07800694	94.6	-0.1405824	94.6	-0.09246798	94.6	-0.07573344	94.6	-0.2660541	94.6	-0.2469506	94.6	-0.307357	94.6	-0.2544107	94.6	-0.2228714	94.6	-0.2712977	94.6	-0.2288564	94.6	-0.2222776	94.6	-0.224051
94.8	-0.09994427	94.8	-0.1596919	94.8	-0.1038278	94.8	-0.06578686	94.8	-0.1363782	94.8	-0.08076993	94.8	-0.06496233	94.8	-0.2637183	94.8	-0.2499238	94.8	-0.3009811	94.8	-0.2553005	94.8	-0.2273839	94.8	-0.2677877	94.8	-0.2220321	94.8	-0.2195575	94.8	-0.2266911
95	-0.09024668	95	-0.1462758	95	-0.09943593	95	-0.05972372	95	-0.1302211	95	-0.07450078	95	-0.05458436	95	-0.2665065	95	-0.2483114	95	-0.310115	95	-0.2551404	95	-0.2266115	95	-0.2643588	95	-0.2262594	95	-0.2201252	95	-0.2270522
95.2	-0.07698021	95.2	-0.1412383	95.2	-0.08594253	95.2	-0.05190485	95.2	-0.1188205	95.2	-0.06267735	95.2	-0.04857267	95.2	-0.2624639	95.2	-0.2445765	95.2	-0.3023906	95.2	-0.2531005	95.2	-0.2268482	95.2	-0.2660607	95.2	-0.2289872	95.2	-0.2205954	95.2	-0.2221652
95.4	-0.07395125	95.4	-0.1333679	95.4	-0.0760034	95.4	-0.04174289	95.4	-0.10979	95.4	-0.04940258	95.4	-0.04028982	95.4	-0.2642573	95.4	-0.2439469	95.4	-0.3041095	95.4	-0.2505489	95.4	-0.2235055	95.4	-0.2617701	95.4	-0.2209046	95.4	-0.2177507	95.4	-0.2281162
95.6	-0.06354755	95.6	-0.120209	95.6	-0.07101224	95.6	-0.03362473	95.6	-0.1003945	95.6	-0.04666572	95.6	-0.02682692	95.6	-0.2653399	95.6	-0.2456188	95.6	-0.3030428	95.6	-0.2538823	95.6	-0.2227992	95.6	-0.2626927	95.6	-0.2245972	95.6	-0.221088	95.6	-0.2277635
95.8	-0.05605562	95.8	-0.1163897	95.8	-0.06271241	95.8	-0.02274423	95.8	-0.0909663	95.8	-0.03761865	95.8	-0.01872821	95.8	-0.2612966	95.8	-0.2471453	95.8	-0.3089364	95.8	-0.2545242	95.8	-0.2257171	95.8	-0.2623562	95.8	-0.2242286	95.8	-0.2199925	95.8	-0.2301363
96	-0.04899433	96	-0.1100282	96	-0.05861335	96	-0.01373047	96	-0.07885209	96	-0.02261564	96	-0.01173396	96	-0.2653772	96	-0.2438198	96	-0.3041449	96	-0.2492302	96	-0.2248104	96	-0.2624917	96	-0.2257989	96	-0.2188097	96	-0.2273713
96.2	-0.04073546	96.2	-0.1052577	96.2	-0.04936876	96.2	-0.00819595	96.2	-0.0752418	96.2	-0.0194351	96.2	-0.00005851	96.2	-0.259153	96.2	-0.2423259	96.2	-0.3106401	96.2	-0.2513867	96.2	-0.2234471	96.2	-0.2614392	96.2	-0.2247283	96.2	-0.2167786	96.2	-0.2220321
96.4	-0.03130845	96.4	-0.09054394	96.4	-0.03337925	96.4	0.00113936	96.4	-0.0654799	96.4	-0.00903567	96.4	0.00415388	96.4	-0.2614818	96.4	-0.2428678	96.4	-0.3022287	96.4	-0.2544908	96.4	-0.2216147	96.4	-0.2626857	96.4	-0.2240693	96.4	-0.2172716	96.4	-0.223127
96.6	-0.01794032	96.6	-0.08255306	96.6	-0.03078386	96.6	0.01098995	96.6	-0.05581726	96.6	-0.00177038	96.6	0.0188585	96.6	-0.2568132	96.6	-0.2442673	96.6	-0.3032705	96.6	-0.2524939	96.6	-0.2166738	96.6	-0.265426	96.6	-0.2220749	96.6	-0.2163019	96.6	-0.2237754
96.8	-0.01319249	96.8	-0.06655754	96.8	-0.02347487	96.8	0.01512227	96.8	-0.04754516	96.8	0.01146215	96.8	0.0247402	96.8	-0.2630352	96.8	-0.2392056	96.8	-0.3002736	96.8	-0.2501461	96.8	-0.2225734	96.8	-0.2586817	96.8	-0.2196629	96.8	-0.2177327	96.8	-0.2264794
97	-0.00498781	97	-0.06756168	97	-0.01510807	97	0.02663063	97	-0.04262481	97	0.0130238	97	0.03300701	97	-0.2569579	97	-0.2387461	97	-0.3013776	97	-0.2528642	97	-0.2240653	97	-0.2590866	97	-0.2209918	97	-0.214131	97	-0.219773
97.2	0.0044897	97.2	-0.05663684	97.2	-0.00580832	97.2	0.03413549	97.2	-0.03280558	97.2	0.02271934	97.2	0.03689435	97.2	-0.2594982	97.2	-0.240434	97.2	-0.2955467	97.2	-0.24914	97.2	-0.2202543	97.2	-0.2578361	97.2	-0.2198941	97.2	-0.2162297	97.2	-0.2247885
97.4	0.00867001	97.4	-0.04230345	97.4	0.00101506	97.4	0.04267076	97.4	-0.02251338	97.4	0.03369324	97.4	0.05015806	97.4	-0.2540468	97.4	-0.2377446	97.4	-0.3019878	97.4	-0.2545368	97.4	-0.2194825	97.4	-0.2589827	97.4	-0.2213225	97.4	-0.2165083	97.4	-0.2219498
97.6	0.02114799	97.6	-0.03963305	97.6	0.00665623	97.6	0.04855758	97.6	-0.01215393	97.6	0.04070479	97.6	0.05584297	97.6	-0.2562422	97.6	-0.2362197	97.6	-0.3015155	97.6	-0.2492341	97.6	-0.2197894	97.6	-0.2556605	97.6	-0.2198821	97.6	-0.2171757	97.6	-0.2169277
97.8	0.0269318	97.8	-0.03170378	97.8	0.01421471	97.8	0.0545161	97.8	-0.00623732	97.8	0.04966598	97.8	0.06390734	97.8	-0.2613163	97.8	-0.238872	97.8	-0.29959	97.8	-0.2486105	97.8	-0.2192632	97.8	-0.2589796	97.8	-0.2223915	97.8	-0.2143945	97.8	-0.2223259
98	0.03518803	98	-0.01968789	98	0.02321623	98	0.0641638	98	0.00141524	98	0.05600396	98	0.07709569	98	-0.256653	98	-0.2368327	98	-0.2944588	98	-0.2509218	98	-0.2188825	98	-0.2584959	98	-0.2204292	98	-0.2144355	98	-0.2204457
98.2	0.04237963	98.2	-0.01334237	98.2	0.02813106	98.2	0.07509995	98.2	0.00777641	98.2	0.06872679	98.2	0.08470893	98.2	-0.2544045	98.2	-0.2365998	98.2	-0.2954296	98.2	-0.2509448	98.2	-0.2154728	98.2	-0.2570186	98.2	-0.2192433	98.2	-0.2184304	98.2	-0.2192462
98.4	0.05141428	98.4	-0.00365274	98.4	0.03607683	98.4	0.08089964	98.4	0.01432365	98.4	0.07200913	98.4	0.09583532	98.4	-0.2560837	98.4	-0.2386802	98.4	-0.2965524	98.4	-0.2506487	98.4	-0.2222492	98.4	-0.2533708	98.4	-0.2210568	98.4	-0.2144205	98.4	-0.2181088
98.6	0.06201358	98.6	-0.00183346	98.6	0.04857968	98.6	0.08753	98.6	0.03016869	98.6	0.08426857	98.6	0.09831086	98.6	-0.2559184	98.6	-0.2351619	98.6	-0.2976172	98.6	-0.2466324	98.6	-0.2170761	98.6	-0.2607773	98.6	-0.220645	98.6	-0.213522	98.6	-0.223173
98.8	0.070852	98.8	0.00787015	98.8	0.05071286	98.8	0.09518766	98.8	0.03601715	98.8	0.0882232	98.8	0.109419	98.8	-0.2606134	98.8	-0.2382978	98.8	-0.2975185	98.8	-0.2502848	98.8	-0.2174051	98.8	-0.2559202	98.8	-0.2215495	98.8	-0.2139814	98.8	-0.2199359
99	0.07200063	99	0.01839246	99	0.06113913	99	0.101127	99	0.04259463	99	0.1007883	99	0.1126039	99	-0.2512551	99	-0.2359333	99	-0.2947967	99	-0.2493733	99	-0.2153708	99	-0.2556089	99	-0.2182679	99	-0.2116581	99	-0.2188396
99.2	0.08314995	99.2	0.02645161	99.2	0.06483133	99.2	0.1069064	99.2	0.05210587	99.2	0.1079099	99.2	0.1250804	99.2	-0.2570131	99.2	-0.2357001	99.2	-0.2978285	99.2	-0.2474605	99.2	-0.2166736	99.2	-0.2575783	99.2	-0.2161743	99.2	-0.2124854	99.2	-0.2197246
99.4	0.09112754	99.4	0.03551795	99.4	0.07354445	99.4	0.1198932	99.4	0.05492823	99.4	0.1142786	99.4	0.1372873	99.4	-0.2605775	99.4	-0.2373527	99.4	-0.3016022	99.4	-0.2444713	99.4	-0.2170894	99.4	-0.2580105	99.4	-0.212189	99.4	-0.2111864	99.4	-0.2185773
99.6	0.09541252	99.6	0.0410629	99.6	0.08147462	99.6	0.1280464	99.6	0.06487241	99.6	0.1193296	99.6	0.1421957	99.6	-0.2531239	99.6	-0.2328087	99.6	-0.2975336	99.6	-0.2458267	99.6	-0.2164078	99.6	-0.2509744	99.6	-0.2161981	99.6	-0.2101922	99.6	-0.2165767
99.8	0.1058977	99.8	0.05318614	99.8	0.08929129	99.8	0.1370829	99.8	0.07080489	99.8	0.1292367	99.8	0.1461284	99.8	-0.2546319	99.8	-0.2372417	99.8	-0.2947719	99.8	-0.243337	99.8	-0.2145059	99.8	-0.2582991	99.8	-0.213791	99.8	-0.2083038	99.8	-0.2189831
100	0.1161198	100	0.05300808	100	0.0950821	100	0.1431776	100	0.07983102	100	0.13621	100	0.1536648	100	-0.256805	100	-0.2341216	100	-0.2940701	100	-0.2434984	100	-0.2145342	100	-0.253795	100	-0.2191351	100	-0.2125755	100	-0.2131986
100.2	0.1241638	100.2	0.064611	100.2	0.1017572	100.2	0.148556	100.2	0.08509728	100.2	0.147015	100.2	0.1692149	100.2	-0.2523586	100.2	-0.2313029	100.2	-0.2914649	100.2	-0.2426174	100.2	-0.2167996	100.2	-0.2536612	100.2	-0.2142527	100.2	-0.2085497	100.2	-0.2161191
100.4	0.1255126	100.4	0.07239274	100.4	0.1120311	100.4	0.157518	100.4	0.09545616	100.4	0.1493966	100.4	0.175802	100.4	-0.254355	100.4	-0.2388656	100.4	-0.2906941	100.4	-0.2447524	100.4	-0.2135935	100.4	-0.2525211	100.4	-0.215689	100.4	-0.2064786	100.4	-0.2231133
100.6	0.1344912	100.6	0.08347514	100.6	0.1194319	100.6	0.1626431	100.6	0.1045013	100.6	0.1629148	100.6	0.179273	100.6	-0.2528601	100.6	-0.2330833	100.6	-0.2941623	100.6	-0.2403914	100.6	-0.2131323	100.6	-0.2540285	100.6	-0.2134706	100.6	-0.209553	100.6	-0.2189112
100.8	0.1432084	100.8	0.08812472	100.8	0.1270187	100.8	0.1717233	100.8	0.1067126	100.8	0.1659106	100.8	0.1887365	100.8	-0.2511541	100.8	-0.2380208	100.8	-0.2948321	100.8	-0.246626	100.8	-0.2160025	100.8	-0.2561874	100.8	-0.2135549	100.8	-0.2078388	100.8	-0.2161269
101	0.1500026	101	0.09403943	101	0.1252623	101	0.1791839	101	0.1145178	101	0.1690746	101	0.1926963	101	-0.2520387	101	-0.2338938	101	-0.2924492	101	-0.2432897	101	-0.2138419	101	-0.2495973	101	-0.212182	101	-0.2076659	101	-0.2135833
101.2	0.1527699	101.2	0.1050514	101.2	0.1360806	101.2	0.1899352	101.2	0.1228104	101.2	0.1828534	101.2	0.2014016	101.2	-0.2518882	101.2	-0.2325232	101.2	-0.2928309	101.2	-0.2453419	101.2	-0.2119395	101.2	-0.2501549	101.2	-0.2157643	101.2	-0.2076318	101.2	-0.2152666
101.4	0.1631395	101.4	0.1102841	101.4	0.1469914	101.4	0.1908121	101.4	0.1306696	101.4	0.1899028	101.4	0.2121727	101.4	-0.2499686	101.4	-0.2295991	101.4	-0.2923414	101.4	-0.2471417	101.4	-0.2120574	101.4	-0.2493664	101.4	-0.2142936	101.4	-0.2097975	101.4	-0.2211483
101.6	0.1744861	101.6	0.117033	101.6	0.1542567	101.6	0.1993784	101.6	0.1404227	101.6	0.1996128	101.6	0.2134987	101.6	-0.2512632	101.6	-0.2295624	101.6	-0.2903889	101.6	-0.2395961	101.6	-0.2125552	101.6	-0.2505462	101.6	-0.2159678	101.6	-0.205857	101.6	-0.216143
101.8	0.1829176	101.8	0.124054	101.8	0.1573696	101.8	0.2034775	101.8	0.1432072	101.8	0.2004281	101.8	0.2238654	101.8	-0.2530578	101.8	-0.2339358	101.8	-0.2905572	101.8	-0.2376958	101.8	-0.2095473	101.8	-0.2541067	101.8	-0.210549	101.8	-0.2076387	101.8	-0.2125991
102	0.1834556	102	0.1271682	102	0.1640357	102	0.2157364	102	0.1540339	102	0.209715	102	0.2331481	102	-0.2531774	102	-0.2322522	102	-0.2910261	102	-0.2434563	102	-0.2147982	102	-0.2527749	102	-0.2126466	102	-0.2098899	102	-0.2170646
102.2	0.1930812	102.2	0.1382191	102.2	0.17105	102.2	0.2201033	102.2	0.1560891	102.2	0.220242	102.2	0.2355856	102.2	-0.2512847	102.2	-0.231879	102.2	-0.2928285	102.2	-0.2396382	102.2	-0.2121857	102.2	-0.2513529	102.2	-0.2141901	102.2	-0.2031124	102.2	-0.2127712
102.4	0.200649	102.4	0.1466349	102.4	0.1763281	102.4	0.2261473	102.4	0.1647783	102.4	0.2223296	102.4	0.2441939	102.4	-0.2482404	102.4	-0.2267713	102.4	-0.2887151	102.4	-0.2376588	102.4	-0.2116758	102.4	-0.2468523	102.4	-0.2136275	102.4	-0.2070345	102.4	-0.2125435
102.6	0.2037506	102.6	0.1542957	102.6	0.1849213	102.6	0.2292458	102.6	0.1753517	102.6	0.2272344	102.6	0.2522122	102.6	-0.2528073	102.6	-0.2279448	102.6	-0.2881714	102.6	-0.2391163	102.6	-0.2101769	102.6	-0.2493417	102.6	-0.2086413	102.6	-0.2074531	102.6	-0.2117014
102.8	0.2139528	102.8	0.1580456	102.8	0.1925238	102.8	0.2390867	102.8	0.1780141	102.8	0.2330256	102.8	0.25638	102.8	-0.2478692	102.8	-0.2282599	102.8	-0.2921382	102.8	-0.2370951	102.8	-0.2113869	102.8	-0.2478179	102.8	-0.2107266	102.8	-0.2054219	102.8	-0.2081102
103	0.219437	103	0.1672802	103	0.1982102	103	0.2497215	103	0.1858551	103	0.2438674	103	0.2652446	103	-0.2432318	103	-0.2262259	103	-0.285604	103	-0.2348752	103	-0.2084927	103	-0.2468516	103	-0.2119959	103	-0.2048241	103	-0.2104555
103.2	0.2221847	103.2	0.1722028	103.2	0.2063553	103.2	0.2498814	103.2	0.1904084	103.2	0.2570165	103.2	0.271031	103.2	-0.252582	103.2	-0.2287703	103.2	-0.2941103	103.2	-0.2405389	103.2	-0.2111537	103.2	-0.249576	103.2	-0.2101486	103.2	-0.2017971	103.2	-0.2112551
103.4	0.2303261	103.4	0.1814593	103.4	0.2065384	103.4	0.2591086	103.4	0.1911451	103.4	0.2584725	103.4	0.2738432	103.4	-0.2517332	103.4	-0.2279764	103.4	-0.2874317	103.4	-0.2375558	103.4	-0.2072519	103.4	-0.2490353	103.4	-0.2057083	103.4	-0.2034935	103.4	-0.2091632
103.6	0.2407454	103.6	0.1810008	103.6	0.2142806	103.6	0.2687683	103.6	0.2082583	103.6	0.2639937	103.6	0.2816755	103.6	-0.2467668	103.6	-0.2258843	103.6	-0.2910669	103.6	-0.239585	103.6	-0.2070119	103.6	-0.2470089	103.6	-0.2110684	103.6	-0.2058178	103.6	-0.212667
103.8	0.2495133	103.8	0.1955487	103.8	0.219506	103.8	0.2728428	103.8	0.2075048	103.8	0.2698742	103.8	0.2908254	103.8	-0.2490522	103.8	-0.2290793	103.8	-0.2875095	103.8	-0.2401603	103.8	-0.210095	103.8	-0.249492	103.8	-0.2097565	103.8	-0.2016794	103.8	-0.2107675
104	0.2481884	104	0.195503	104	0.2284632	104	0.2758031	104	0.2239584	104	0.2792464	104	0.2954581	104	-0.2441144	104	-0.2309619	104	-0.2848539	104	-0.2377736	104	-0.2054072	104	-0.2488675	104	-0.2052153	104	-0.1987011	104	-0.2121391
104.2	0.257341	104.2	0.2040903	104.2	0.2334003	104.2	0.2803706	104.2	0.2222701	104.2	0.2824926	104.2	0.302057	104.2	-0.2466156	104.2	-0.2233912	104.2	-0.2816747	104.2	-0.237433	104.2	-0.2094951	104.2	-0.242847	104.2	-0.2103004	104.2	-0.2038188	104.2	-0.2112455
104.4	0.2666538	104.4	0.2123202	104.4	0.2460059	104.4	0.2880544	104.4	0.2261865	104.4	0.2881968	104.4	0.3084836	104.4	-0.2437445	104.4	-0.2282793	104.4	-0.2870969	104.4	-0.2376165	104.4	-0.2014025	104.4	-0.2440299	104.4	-0.2059398	104.4	-0.2000632	104.4	-0.2122488
104.6	0.271362	104.6	0.2127675	104.6	0.2498284	104.6	0.298951	104.6	0.2306391	104.6	0.297843	104.6	0.3145797	104.6	-0.2460623	104.6	-0.2253239	104.6	-0.289446	104.6	-0.2355938	104.6	-0.2052971	104.6	-0.2439858	104.6	-0.206349	104.6	-0.200765	104.6	-0.2089254
104.8	0.2767133	104.8	0.2259356	104.8	0.2494304	104.8	0.2988557	104.8	0.2443271	104.8	0.3022482	104.8	0.3281332	104.8	-0.2450098	104.8	-0.2293338	104.8	-0.2885852	104.8	-0.2378392	104.8	-0.2051869	104.8	-0.2457491	104.8	-0.203391	104.8	-0.2002998	104.8	-0.2119869
105	0.2842091	105	0.2305613	105	0.2573951	105	0.310496	105	0.2450508	105	0.31135	105	0.3283664	105	-0.2432522	105	-0.2244734	105	-0.2853481	105	-0.2360415	105	-0.2025543	105	-0.2449291	105	-0.2063138	105	-0.200859	105	-0.2041552
105.2	0.2890679	105.2	0.2332884	105.2	0.266432	105.2	0.3138599	105.2	0.2505326	105.2	0.3135754	105.2	0.3345447	105.2	-0.2479985	105.2	-0.2262136	105.2	-0.2869925	105.2	-0.2365374	105.2	-0.2023148	105.2	-0.2423514	105.2	-0.2030394	105.2	-0.2059743	105.2	-0.2060738
105.4	0.2877502	105.4	0.2403707	105.4	0.2719879	105.4	0.3175042	105.4	0.2591405	105.4	0.320115	105.4	0.3396163	105.4	-0.2423349	105.4	-0.2244651	105.4	-0.2837646	105.4	-0.2332407	105.4	-0.2071668	105.4	-0.2395062	105.4	-0.2054858	105.4	-0.1977504	105.4	-0.2068904
105.6	0.2985835	105.6	0.2460996	105.6	0.2781232	105.6	0.3255937	105.6	0.2622822	105.6	0.3271171	105.6	0.3456545	105.6	-0.2446576	105.6	-0.2254948	105.6	-0.2829361	105.6	-0.233997	105.6	-0.2020674	105.6	-0.2451455	105.6	-0.2033827	105.6	-0.2012549	105.6	-0.2063935
105.8	0.3006649	105.8	0.2566006	105.8	0.2818438	105.8	0.3295569	105.8	0.2708973	105.8	0.3333554	105.8	0.3517613	105.8	-0.2447654	105.8	-0.2226012	105.8	-0.2820548	105.8	-0.2293986	105.8	-0.2038603	105.8	-0.2415489	105.8	-0.2046638	105.8	-0.1994902	105.8	-0.2086897
106	0.3096238	106	0.2551027	106	0.2909542	106	0.3344036	106	0.2740515	106	0.3373161	106	0.3608436	106	-0.2460656	106	-0.2205891	106	-0.2808351	106	-0.2360746	106	-0.2045762	106	-0.2407819	106	-0.2052329	106	-0.202007	106	-0.2026748
106.2	0.3209781	106.2	0.2651471	106.2	0.2914152	106.2	0.3414017	106.2	0.2826071	106.2	0.3447196	106.2	0.3628222	106.2	-0.2434719	106.2	-0.2202319	106.2	-0.2814694	106.2	-0.2312193	106.2	-0.2075817	106.2	-0.2413635	106.2	-0.2025479	106.2	-0.1996498	106.2	-0.2089399
106.4	0.3245995	106.4	0.271139	106.4	0.299478	106.4	0.3497557	106.4	0.2843204	106.4	0.3496234	106.4	0.3651255	106.4	-0.2409211	106.4	-0.2208771	106.4	-0.2815862	106.4	-0.2306246	106.4	-0.207938	106.4	-0.2435704	106.4	-0.2018969	106.4	-0.201648	106.4	-0.2004913
106.6	0.3247628	106.6	0.2755373	106.6	0.3074434	106.6	0.3527988	106.6	0.2945297	106.6	0.3542646	106.6	0.3767877	106.6	-0.2423906	106.6	-0.2207793	106.6	-0.2754017	106.6	-0.2330846	106.6	-0.2016092	106.6	-0.2361036	106.6	-0.1993271	106.6	-0.196022	106.6	-0.2065049
106.8	0.3362651	106.8	0.2821572	106.8	0.3113904	106.8	0.3567683	106.8	0.300741	106.8	0.3604731	106.8	0.3794293	106.8	-0.2373763	106.8	-0.2198376	106.8	-0.2819289	106.8	-0.2318949	106.8	-0.2056354	106.8	-0.236876	106.8	-0.2006882	106.8	-0.1965141	106.8	-0.2089609
107	0.3388545	107	0.2865734	107	0.3113068	107	0.3650225	107	0.3061407	107	0.3662371	107	0.3857158	107	-0.2427592	107	-0.2223248	107	-0.283989	107	-0.2265533	107	-0.2026003	107	-0.2410189	107	-0.2004273	107	-0.1901016	107	-0.2074874
107.2	0.3468984	107.2	0.2937876	107.2	0.3198759	107.2	0.3754062	107.2	0.3076635	107.2	0.3703745	107.2	0.3852517	107.2	-0.2430738	107.2	-0.226494	107.2	-0.2824211	107.2	-0.2274237	107.2	-0.1990927	107.2	-0.2409206	107.2	-0.1977569	107.2	-0.1968571	107.2	-0.2058281
107.4	0.3526982	107.4	0.2961783	107.4	0.3294674	107.4	0.3744059	107.4	0.3152464	107.4	0.3775085	107.4	0.3991256	107.4	-0.2406114	107.4	-0.2150755	107.4	-0.281211	107.4	-0.2320957	107.4	-0.2000534	107.4	-0.2405055	107.4	-0.1989114	107.4	-0.2003249	107.4	-0.2047404
107.6	0.350993	107.6	0.3026527	107.6	0.3326432	107.6	0.3799507	107.6	0.3169611	107.6	0.3860108	107.6	0.4032278	107.6	-0.2379635	107.6	-0.2236246	107.6	-0.2825386	107.6	-0.2321163	107.6	-0.2023925	107.6	-0.2416781	107.6	-0.1985756	107.6	-0.1976477	107.6	-0.2012208
107.8	0.3637043	107.8	0.3060722	107.8	0.3298034	107.8	0.3870178	107.8	0.3252709	107.8	0.3837845	107.8	0.4056142	107.8	-0.2386196	107.8	-0.2196199	107.8	-0.2792649	107.8	-0.2306283	107.8	-0.2043065	107.8	-0.2379767	107.8	-0.2018616	107.8	-0.1969216	107.8	-0.2097258
108	0.3689573	108	0.3154594	108	0.338918	108	0.389133	108	0.330515	108	0.3912611	108	0.4115712	108	-0.2377069	108	-0.2223235	108	-0.2784538	108	-0.2284865	108	-0.2003533	108	-0.2364302	108	-0.2000166	108	-0.1932837	108	-0.2026883
108.2	0.3668888	108.2	0.3172034	108.2	0.3429008	108.2	0.396931	108.2	0.3362153	108.2	0.3997859	108.2	0.4126093	108.2	-0.241559	108.2	-0.2183812	108.2	-0.2793225	108.2	-0.2283993	108.2	-0.1989037	108.2	-0.241217	108.2	-0.2009941	108.2	-0.1963313	108.2	-0.203304
108.4	0.3763568	108.4	0.3240925	108.4	0.3508503	108.4	0.3982588	108.4	0.3361921	108.4	0.4015685	108.4	0.4257479	108.4	-0.2417022	108.4	-0.217611	108.4	-0.2829296	108.4	-0.2288542	108.4	-0.1979323	108.4	-0.2416232	108.4	-0.199667	108.4	-0.1982075	108.4	-0.2058839
108.6	0.3751394	108.6	0.3354841	108.6	0.3620118	108.6	0.4032192	108.6	0.3435468	108.6	0.4070338	108.6	0.4282058	108.6	-0.2373465	108.6	-0.2164032	108.6	-0.279401	108.6	-0.2279096	108.6	-0.1991585	108.6	-0.2438185	108.6	-0.2016827	108.6	-0.1984657	108.6	-0.2034276
108.8	0.3827024	108.8	0.3375171	108.8	0.3615419	108.8	0.4061607	108.8	0.3497612	108.8	0.4101072	108.8	0.4358075	108.8	-0.238013	108.8	-0.2156489	108.8	-0.2770784	108.8	-0.2261954	108.8	-0.2013452	108.8	-0.2385296	108.8	-0.1998877	108.8	-0.1927866	108.8	-0.2028674
109	0.3926782	109	0.3387385	109	0.3686759	109	0.415129	109	0.3523793	109	0.4159719	109	0.4363931	109	-0.2326024	109	-0.2159953	109	-0.2782549	109	-0.2323866	109	-0.1996449	109	-0.2378941	109	-0.1968568	109	-0.1965618	109	-0.2015073
109.2	0.3933839	109.2	0.3471063	109.2	0.3698328	109.2	0.4156653	109.2	0.3596217	109.2	0.4235171	109.2	0.4401529	109.2	-0.2399398	109.2	-0.221331	109.2	-0.2760401	109.2	-0.2287939	109.2	-0.1944891	109.2	-0.2379407	109.2	-0.1970744	109.2	-0.1927241	109.2	-0.2032559
109.4	0.3978689	109.4	0.3499958	109.4	0.3810746	109.4	0.4259264	109.4	0.3677391	109.4	0.4293602	109.4	0.4495479	109.4	-0.2381991	109.4	-0.2159769	109.4	-0.2785345	109.4	-0.2301404	109.4	-0.1962481	109.4	-0.2354022	109.4	-0.1971501	109.4	-0.1941594	109.4	-0.2007966
109.6	0.4035973	109.6	0.3534018	109.6	0.3831066	109.6	0.429859	109.6	0.3648834	109.6	0.432302	109.6	0.4530928	109.6	-0.232485	109.6	-0.2187837	109.6	-0.2776277	109.6	-0.2278788	109.6	-0.1994826	109.6	-0.2348103	109.6	-0.1953535	109.6	-0.1934903	109.6	-0.1981837
109.8	0.4072234	109.8	0.3631759	109.8	0.3824962	109.8	0.4339984	109.8	0.3742653	109.8	0.4345261	109.8	0.4580465	109.8	-0.2413983	109.8	-0.2183581	109.8	-0.2792882	109.8	-0.2276492	109.8	-0.1956766	109.8	-0.2374577	109.8	-0.1980075	109.8	-0.1908126	109.8	-0.1998619
110	0.4144465	110	0.368897	110	0.3917599	110	0.438039	110	0.3753265	110	0.4433638	110	0.4625883	110	-0.2384403	110	-0.218626	110	-0.2761742	110	-0.2254367	110	-0.1930089	110	-0.2379765	110	-0.1948269	110	-0.1920939	110	-0.199202
110.2	0.4196025	110.2	0.3703967	110.2	0.3996859	110.2	0.4457598	110.2	0.383464	110.2	0.4460427	110.2	0.4649392	110.2	-0.234276	110.2	-0.2185524	110.2	-0.27396	110.2	-0.2256182	110.2	-0.1991242	110.2	-0.2364126	110.2	-0.1920037	110.2	-0.1932395	110.2	-0.1996062
110.4	0.4207987	110.4	0.3739756	110.4	0.4043698	110.4	0.446745	110.4	0.3900125	110.4	0.4524401	110.4	0.4677858	110.4	-0.2372386	110.4	-0.2120355	110.4	-0.2761316	110.4	-0.2254092	110.4	-0.1983862	110.4	-0.2373616	110.4	-0.1968459	110.4	-0.1919498	110.4	-0.2025118
110.6	0.4251333	110.6	0.3811296	110.6	0.4063162	110.6	0.4547884	110.6	0.3925522	110.6	0.4582603	110.6	0.4790259	110.6	-0.233417	110.6	-0.2150187	110.6	-0.2756993	110.6	-0.2307532	110.6	-0.1982501	110.6	-0.2355042	110.6	-0.1961413	110.6	-0.187982	110.6	-0.1987143
110.8	0.4320809	110.8	0.3798179	110.8	0.4058852	110.8	0.4548714	110.8	0.3943315	110.8	0.4597082	110.8	0.4837053	110.8	-0.232543	110.8	-0.2139427	110.8	-0.2711878	110.8	-0.2274411	110.8	-0.1911849	110.8	-0.234086	110.8	-0.1943693	110.8	-0.1879054	110.8	-0.1998016
111	0.4366229	111	0.3904756	111	0.4142751	111	0.4607444	111	0.3971195	111	0.4665538	111	0.490338	111	-0.2362413	111	-0.2110841	111	-0.2740978	111	-0.2279438	111	-0.1912075	111	-0.2304951	111	-0.196081	111	-0.1875873	111	-0.1927987
111.2	0.4393358	111.2	0.3913078	111.2	0.4201298	111.2	0.4664601	111.2	0.4102559	111.2	0.465825	111.2	0.4893237	111.2	-0.2363632	111.2	-0.2131324	111.2	-0.2744938	111.2	-0.2211829	111.2	-0.1924361	111.2	-0.2292077	111.2	-0.1943454	111.2	-0.1889272	111.2	-0.1989072
111.4	0.4437728	111.4	0.3963951	111.4	0.4234985	111.4	0.4718095	111.4	0.4105023	111.4	0.4724396	111.4	0.4943492	111.4	-0.2297089	111.4	-0.2156823	111.4	-0.2747729	111.4	-0.2291606	111.4	-0.1937276	111.4	-0.2276786	111.4	-0.1964573	111.4	-0.1894187	111.4	-0.1995151
111.6	0.4484333	111.6	0.4012445	111.6	0.4273039	111.6	0.4723516	111.6	0.4151143	111.6	0.4817113	111.6	0.4992681	111.6	-0.2309914	111.6	-0.2143732	111.6	-0.2704214	111.6	-0.2236455	111.6	-0.1947301	111.6	-0.2337536	111.6	-0.194779	111.6	-0.1913992	111.6	-0.1989335
111.8	0.4557489	111.8	0.4076991	111.8	0.4322446	111.8	0.4790208	111.8	0.4167527	111.8	0.4857679	111.8	0.5023383	111.8	-0.2325507	111.81	-0.2132688	111.81	-0.2716748	111.81	-0.224943	111.81	-0.1917312	111.81	-0.2350034	111.81	-0.1968586	111.81	-0.187419	111.81	-0.1928937
112	0.4608805	112	0.4127915	112	0.4377383	112	0.4832579	112	0.4269728	112	0.4876493	112	0.5068806	112	-0.2353202	112	-0.2103165	112	-0.2751171	112	-0.2189011	112	-0.1949883	112	-0.2310133	112	-0.1951415	112	-0.1908036	112	-0.1958064
112.2	0.4670644	112.2	0.4166695	112.2	0.4412504	112.2	0.482357	112.2	0.4286795	112.2	0.4880177	112.2	0.5118915	112.2	-0.2362257	112.2	-0.2074736	112.2	-0.2727917	112.2	-0.22221	112.2	-0.1920736	112.2	-0.2307335	112.2	-0.1912776	112.2	-0.1885184	112.2	-0.195674
112.4	0.4754174	112.4	0.412964	112.4	0.4460389	112.4	0.4927973	112.4	0.4309702	112.4	0.4976911	112.4	0.5149075	112.4	-0.2340485	112.4	-0.2129128	112.4	-0.2708683	112.4	-0.2236528	112.4	-0.1904638	112.4	-0.2326813	112.4	-0.1943006	112.4	-0.1893243	112.4	-0.194995
112.6	0.4685827	112.6	0.4223138	112.6	0.4479596	112.6	0.4932537	112.6	0.4339274	112.6	0.5009713	112.6	0.5202181	112.6	-0.2313408	112.6	-0.2137432	112.6	-0.2737274	112.6	-0.2218925	112.6	-0.1910105	112.6	-0.2283626	112.6	-0.1928909	112.6	-0.1878836	112.6	-0.1948893
112.8	0.4782383	112.8	0.4254682	112.8	0.4544154	112.8	0.4983806	112.8	0.440767	112.8	0.5062569	112.8	0.5228399	112.8	-0.2345201	112.8	-0.2116944	112.8	-0.2712907	112.8	-0.220255	112.8	-0.1920479	112.8	-0.2286867	112.8	-0.1926716	112.8	-0.1873911	112.8	-0.1956689
113	0.4796896	113	0.4332706	113	0.4605628	113	0.4992017	113	0.4399436	113	0.5050273	113	0.5280296	113	-0.230951	113	-0.2084997	113	-0.2736624	113	-0.2253559	113	-0.1913662	113	-0.23	113	-0.1920414	113	-0.1899283	113	-0.19585
113.2	0.4800266	113.2	0.4314158	113.2	0.4636854	113.2	0.5054834	113.2	0.443034	113.2	0.5136396	113.2	0.5315823	113.2	-0.2300429	113.2	-0.2114777	113.2	-0.2704307	113.2	-0.2227159	113.2	-0.1949227	113.2	-0.2258362	113.2	-0.1930774	113.2	-0.1863201	113.2	-0.1926122
113.4	0.4864452	113.4	0.4415438	113.4	0.4675658	113.4	0.512003	113.4	0.4501572	113.4	0.5130502	113.4	0.5338269	113.4	-0.2320843	113.4	-0.2063003	113.4	-0.2707608	113.4	-0.2218514	113.4	-0.1926036	113.4	-0.2217858	113.4	-0.1849409	113.4	-0.186426	113.4	-0.1943131
113.6	0.4925852	113.6	0.445523	113.6	0.4743687	113.6	0.5120674	113.6	0.4533112	113.6	0.5155079	113.6	0.5413098	113.6	-0.2266489	113.6	-0.2098276	113.6	-0.2706054	113.6	-0.220612	113.6	-0.1910636	113.6	-0.2283711	113.6	-0.1892522	113.6	-0.1907228	113.6	-0.1916087
113.8	0.4944929	113.8	0.4453242	113.8	0.4744742	113.8	0.5173013	113.8	0.4579383	113.8	0.5295699	113.8	0.5460293	113.8	-0.2293619	113.8	-0.2086839	113.8	-0.2728869	113.8	-0.2140484	113.8	-0.1896942	113.8	-0.2286959	113.8	-0.1921717	113.8	-0.1822641	113.8	-0.1936994
114	0.5006852	114	0.4539044	114	0.4789791	114	0.5242118	114	0.4632222	114	0.5304334	114	0.548066	114	-0.2314712	114	-0.207981	114	-0.2705827	114	-0.2168624	114	-0.1943002	114	-0.2237836	114	-0.1917426	114	-0.1848209	114	-0.1920038
114.2	0.5066794	114.2	0.4544239	114.2	0.4821836	114.2	0.5251166	114.2	0.4680395	114.2	0.5339598	114.2	0.5520163	114.2	-0.2325348	114.2	-0.2103332	114.2	-0.2703294	114.2	-0.2169222	114.2	-0.1881554	114.2	-0.2293061	114.2	-0.1898458	114.2	-0.1858004	114.2	-0.1917237
114.4	0.5094621	114.4	0.4598503	114.4	0.4908029	114.4	0.531197	114.4	0.4732003	114.4	0.5370754	114.4	0.556689	114.4	-0.2291726	114.4	-0.2087307	114.4	-0.2691021	114.4	-0.2204541	114.4	-0.1930176	114.4	-0.2311231	114.4	-0.1909855	114.4	-0.1877093	114.4	-0.1951642
114.6	0.5118478	114.6	0.459654	114.6	0.4907388	114.6	0.5352422	114.6	0.4729783	114.6	0.543322	114.6	0.5622693	114.6	-0.2262325	114.6	-0.2118983	114.6	-0.268625	114.6	-0.2205038	114.6	-0.1884248	114.6	-0.2246241	114.6	-0.1893826	114.6	-0.1847804	114.6	-0.1980098
114.8	0.5093529	114.8	0.4685088	114.8	0.4962508	114.8	0.5370353	114.8	0.4793816	114.8	0.5434551	114.8	0.5594541	114.8	-0.2302089	114.8	-0.2125502	114.8	-0.2671321	114.8	-0.2128498	114.8	-0.1907047	114.8	-0.2254883	114.8	-0.1869234	114.8	-0.1894854	114.8	-0.1927378
115	0.519325	115	0.4702646	115	0.5011218	115	0.5430486	115	0.4828127	115	0.5462557	115	0.5681705	115	-0.2268918	115	-0.2051734	115	-0.2654732	115	-0.2163816	115	-0.1903816	115	-0.2283496	115	-0.1870236	115	-0.1817334	115	-0.1911448
115.2	0.5218443	115.2	0.4724242	115.2	0.5025306	115.2	0.5435304	115.2	0.4872525	115.2	0.5514781	115.2	0.5720647	115.2	-0.2279593	115.2	-0.2074799	115.2	-0.2659566	115.2	-0.2195556	115.2	-0.1892049	115.2	-0.2286225	115.2	-0.1877163	115.2	-0.1868315	115.2	-0.1912849
115.4	0.524542	115.4	0.4773781	115.4	0.5043544	115.4	0.5479699	115.4	0.4897572	115.4	0.5543995	115.4	0.5707555	115.4	-0.2240611	115.4	-0.205696	115.4	-0.2657502	115.4	-0.2134117	115.4	-0.1881987	115.4	-0.2206595	115.4	-0.1874371	115.4	-0.1845018	115.4	-0.1950304
115.6	0.5317917	115.6	0.4846334	115.6	0.506803	115.6	0.547311	115.6	0.4901423	115.6	0.5559057	115.6	0.577413	115.6	-0.2271927	115.6	-0.2083509	115.6	-0.2662951	115.6	-0.216507	115.6	-0.1888303	115.6	-0.2239704	115.6	-0.1846185	115.6	-0.1788496	115.6	-0.1931714
115.8	0.5328279	115.8	0.4898468	115.8	0.5099365	115.8	0.5553565	115.8	0.4996662	115.8	0.564491	115.8	0.5864245	115.8	-0.2257921	115.8	-0.2074016	115.8	-0.2703587	115.8	-0.2155434	115.8	-0.1887682	115.8	-0.2260887	115.8	-0.1863497	115.8	-0.1820424	115.8	-0.1935708
116	0.5357651	116	0.4870209	116	0.5142832	116	0.5552779	116	0.4966391	116	0.5631148	116	0.5897849	116	-0.2290959	116	-0.20787	116	-0.2617254	116	-0.2119638	116	-0.189624	116	-0.2266509	116	-0.1824337	116	-0.1800745	116	-0.1945288
116.2	0.5403499	116.2	0.4916221	116.2	0.5217705	116.2	0.560562	116.2	0.5031589	116.2	0.5680832	116.2	0.592927	116.2	-0.2270175	116.2	-0.2069914	116.2	-0.2655892	116.2	-0.2120763	116.2	-0.1864333	116.2	-0.2255713	116.2	-0.1857296	116.2	-0.1798318	116.2	-0.1938692
116.4	0.5438607	116.4	0.4966738	116.4	0.529406	116.4	0.5604275	116.4	0.5067581	116.4	0.5768216	116.4	0.5904593	116.4	-0.2228637	116.4	-0.209177	116.4	-0.2654403	116.4	-0.2164174	116.4	-0.1863894	116.4	-0.2221252	116.4	-0.1907852	116.4	-0.1805154	116.4	-0.1906232
116.6	0.547757	116.6	0.5008177	116.6	0.5265759	116.6	0.5667643	116.6	0.5156788	116.6	0.5756971	116.6	0.5979022	116.6	-0.2204079	116.6	-0.2060734	116.6	-0.2613971	116.6	-0.2135609	116.6	-0.1853813	116.6	-0.2281138	116.6	-0.1845486	116.6	-0.1806016	116.6	-0.1882874
116.8	0.5531983	116.8	0.5040104	116.8	0.5332126	116.8	0.5726687	116.8	0.5148971	116.8	0.5815138	116.8	0.5952688	116.8	-0.2292183	116.8	-0.2042298	116.8	-0.2617761	116.8	-0.2109514	116.8	-0.1838805	116.8	-0.2273528	116.8	-0.1848667	116.8	-0.1802066	116.8	-0.1874988
117	0.5568846	117	0.5058863	117	0.5373652	117	0.5797752	117	0.5153282	117	0.5809583	117	0.6029906	117	-0.2258331	117	-0.2025333	117	-0.2658645	117	-0.211153	117	-0.1839171	117	-0.226908	117	-0.1872281	117	-0.1829069	117	-0.1952376
117.2	0.5518767	117.2	0.5095031	117.2	0.5387108	117.2	0.5765759	117.2	0.519043	117.2	0.5896209	117.2	0.6071698	117.2	-0.2304164	117.2	-0.2035124	117.2	-0.2628197	117.2	-0.2105929	117.2	-0.1850935	117.2	-0.2198806	117.2	-0.1849577	117.2	-0.1775713	117.2	-0.185993
117.4	0.5641593	117.4	0.5125719	117.4	0.5448151	117.4	0.5868465	117.4	0.5269433	117.4	0.5936624	117.4	0.6078411	117.4	-0.2253405	117.4	-0.204711	117.4	-0.2657805	117.4	-0.2156983	117.4	-0.1850164	117.4	-0.2273661	117.4	-0.185614	117.4	-0.1838683	117.4	-0.1879697
117.6	0.5626819	117.6	0.5164627	117.6	0.542789	117.6	0.5868403	117.6	0.5303091	117.6	0.5931861	117.6	0.6183998	117.6	-0.2277565	117.6	-0.2038267	117.6	-0.2635333	117.6	-0.2089265	117.6	-0.1852516	117.6	-0.2243982	117.6	-0.188341	117.6	-0.1798218	117.6	-0.1874463
117.8	0.5634674	117.8	0.5211558	117.8	0.5475056	117.8	0.5880098	117.8	0.5298995	117.8	0.5977206	117.8	0.6147313	117.8	-0.2310386	117.8	-0.2035024	117.8	-0.2588272	117.8	-0.209888	117.8	-0.1821618	117.8	-0.2190387	117.8	-0.1864669	117.8	-0.1804414	117.8	-0.1883109
118	0.5719335	118	0.5268506	118	0.5552371	118	0.5933685	118	0.5341935	118	0.5983885	118	0.6196817	118	-0.228359	118	-0.2046326	118	-0.2616312	118	-0.2122057	118	-0.1893453	118	-0.2200025	118	-0.1833233	118	-0.1826376	118	-0.1884636
118.2	0.5750163	118.2	0.5279083	118.2	0.5535058	118.2	0.5979279	118.2	0.5378285	118.2	0.6014972	118.2	0.6234323	118.2	-0.2240027	118.2	-0.2045988	118.2	-0.2573023	118.2	-0.2149605	118.2	-0.1852647	118.2	-0.2257195	118.2	-0.1834396	118.2	-0.1775756	118.2	-0.187353
118.4	0.573921	118.4	0.5308346	118.4	0.5648232	118.4	0.5960324	118.4	0.5418012	118.4	0.6068352	118.4	0.6252952	118.4	-0.2230068	118.4	-0.2069029	118.4	-0.2569834	118.4	-0.210908	118.4	-0.1848788	118.4	-0.2242784	118.4	-0.1848341	118.4	-0.1773065	118.4	-0.1880812
118.6	0.5824606	118.6	0.5336533	118.6	0.5609528	118.6	0.6063077	118.6	0.5439103	118.6	0.6081549	118.6	0.6331255	118.6	-0.2207652	118.6	-0.2000558	118.6	-0.2614453	118.6	-0.2103751	118.6	-0.1795017	118.6	-0.2188222	118.6	-0.182364	118.6	-0.1773421	118.6	-0.1858994
118.8	0.5818943	118.8	0.5348144	118.8	0.5682663	118.8	0.6050944	118.8	0.5476517	118.8	0.6132575	118.8	0.6348026	118.8	-0.224041	118.8	-0.2034234	118.8	-0.2625208	118.8	-0.2148225	118.8	-0.1838344	118.8	-0.2238363	118.8	-0.1789796	118.8	-0.1760054	118.8	-0.1853116
119	0.5847913	119	0.5418542	119	0.5743032	119	0.6065665	119	0.5453826	119	0.6127166	119	0.6351339	119	-0.2186545	119	-0.2031703	119	-0.2617415	119	-0.2118865	119	-0.1849007	119	-0.2208954	119	-0.1813072	119	-0.1787022	119	-0.1889131
119.2	0.5902807	119.2	0.5409172	119.2	0.5747199	119.2	0.6065873	119.2	0.5567462	119.2	0.6214182	119.2	0.638761	119.2	-0.2275194	119.2	-0.1979293	119.2	-0.2610832	119.2	-0.2122176	119.2	-0.1803526	119.2	-0.2197517	119.2	-0.1815693	119.2	-0.1780884	119.2	-0.1877153
119.4	0.594207	119.4	0.5485128	119.4	0.5756058	119.4	0.6152436	119.4	0.5551234	119.4	0.6208052	119.4	0.6475277	119.4	-0.2205725	119.4	-0.2014452	119.4	-0.2644647	119.4	-0.2087486	119.4	-0.1797079	119.4	-0.2255777	119.4	-0.1798262	119.4	-0.17689	119.4	-0.1831916
119.6	0.5967483	119.6	0.5513452	119.6	0.5831363	119.6	0.6150113	119.6	0.5583206	119.6	0.6250979	119.6	0.6489397	119.6	-0.2234816	119.6	-0.2027699	119.6	-0.2534398	119.6	-0.2092112	119.6	-0.1782824	119.6	-0.2225077	119.6	-0.1805771	119.6	-0.171727	119.6	-0.181986
119.8	0.6029069	119.8	0.5502201	119.8	0.5818997	119.8	0.6190823	119.8	0.5589969	119.8	0.6257634	119.8	0.6487384	119.8	-0.2216505	119.8	-0.2021821	119.8	-0.2616687	119.8	-0.2085982	119.8	-0.1796188	119.8	-0.2186198	119.8	-0.1807662	119.8	-0.1788359	119.8	-0.187259
120	0.6014877	120	0.5550894	120	0.5888234	120	0.6245061	120	0.5677115	120	0.631329	120	0.6516526	120	-0.2164751	120	-0.2020717	120	-0.2619436	120	-0.2083467	120	-0.1798046	120	-0.2212179	120	-0.1812219	120	-0.1762384	120	-0.1838828
120.2	0.605208	120.2	0.5614986	120.2	0.5945349	120.2	0.625579	120.2	0.5660034	120.2	0.6354744	120.2	0.65613	120.2	-0.2229758	120.2	-0.2016677	120.2	-0.2576465	120.2	-0.2130976	120.2	-0.1785687	120.2	-0.2209724	120.2	-0.1815587	120.2	-0.177136	120.2	-0.1797733
120.4	0.606347	120.4	0.5619122	120.4	0.5892691	120.4	0.6305022	120.4	0.5705767	120.4	0.643581	120.4	0.6635615	120.4	-0.2223285	120.4	-0.2007704	120.4	-0.2588977	120.4	-0.2077662	120.4	-0.177822	120.4	-0.2181122	120.4	-0.1821314	120.4	-0.1758033	120.4	-0.1927235
120.6	0.6062849	120.6	0.5696099	120.6	0.597814	120.6	0.6273524	120.6	0.5758893	120.6	0.6384761	120.6	0.6628639	120.6	-0.2201886	120.6	-0.1988753	120.6	-0.2609546	120.6	-0.2060916	120.6	-0.1825605	120.6	-0.2122655	120.6	-0.1784553	120.6	-0.1754135	120.6	-0.1870255
120.8	0.6176409	120.8	0.5707324	120.8	0.597441	120.8	0.6326029	120.8	0.5751533	120.8	0.6437837	120.8	0.6670929	120.8	-0.2197071	120.8	-0.19961	120.8	-0.2525367	120.8	-0.212609	120.8	-0.1846125	120.8	-0.2137521	120.8	-0.1800555	120.8	-0.1737376	120.8	-0.1831835
121	0.6143972	121	0.5680552	121	0.6046844	121	0.6368636	121	0.5763315	121	0.6508296	121	0.6673601	121	-0.2194594	121	-0.195631	121	-0.2606632	121	-0.2095661	121	-0.180383	121	-0.2165392	121	-0.1823217	121	-0.1688948	121	-0.1815518
121.2	0.6169782	121.2	0.5777853	121.2	0.6073869	121.2	0.6356723	121.2	0.5857012	121.2	0.6516376	121.2	0.6681184	121.2	-0.2199495	121.2	-0.1949992	121.2	-0.2574287	121.2	-0.2054646	121.2	-0.1796837	121.2	-0.2154435	121.2	-0.1788758	121.2	-0.1729166	121.2	-0.1814539
121.4	0.6225294	121.4	0.5708985	121.4	0.6098813	121.4	0.6429953	121.4	0.591872	121.4	0.6507443	121.4	0.6744973	121.4	-0.223502	121.4	-0.1941693	121.4	-0.2595931	121.4	-0.2080276	121.4	-0.1799625	121.4	-0.2171167	121.4	-0.176055	121.4	-0.1732806	121.4	-0.1874225
121.6	0.6230767	121.6	0.5783608	121.6	0.610258	121.6	0.6462117	121.6	0.5887555	121.6	0.6575961	121.6	0.6734805	121.6	-0.2208124	121.6	-0.1947938	121.6	-0.2604275	121.6	-0.2036561	121.6	-0.1787792	121.6	-0.2149919	121.6	-0.1803042	121.6	-0.1745062	121.6	-0.1823246
121.8	0.6264887	121.8	0.5853873	121.8	0.6148387	121.8	0.6525244	121.8	0.591217	121.8	0.659698	121.8	0.6830843	121.8	-0.2156667	121.8	-0.1949511	121.8	-0.2586688	121.8	-0.2075697	121.8	-0.1760307	121.8	-0.2182246	121.8	-0.1779786	121.8	-0.1726488	121.8	-0.1862476
122	0.6296351	122	0.5857906	122	0.6162109	122	0.6482045	122	0.5902326	122	0.6599861	122	0.6823926	122	-0.2220681	122	-0.1997368	122	-0.2567583	122	-0.2063731	122	-0.1765577	122	-0.2177142	122	-0.1775403	122	-0.1726183	122	-0.1847598
122.2	0.6356693	122.2	0.5922644	122.2	0.6209018	122.2	0.6530198	122.2	0.5969218	122.2	0.6608959	122.2	0.6860937	122.2	-0.2187857	122.2	-0.1983516	122.2	-0.2586165	122.2	-0.2048445	122.2	-0.1798842	122.2	-0.2180192	122.2	-0.1754535	122.2	-0.1760789	122.2	-0.1859716
122.4	0.633155	122.4	0.5909532	122.4	0.6209332	122.4	0.6534364	122.4	0.6029144	122.4	0.6658897	122.4	0.6926218	122.4	-0.2228725	122.4	-0.2020686	122.4	-0.2549906	122.4	-0.2095985	122.4	-0.1779845	122.4	-0.2176003	122.4	-0.1804796	122.4	-0.1713675	122.4	-0.1848966
122.6	0.6348328	122.6	0.5963724	122.6	0.6274257	122.6	0.6619765	122.6	0.6006773	122.6	0.6698706	122.6	0.6924874	122.6	-0.2151303	122.6	-0.198646	122.6	-0.2576185	122.6	-0.206864	122.6	-0.1769597	122.6	-0.2184387	122.6	-0.1772142	122.6	-0.1719576	122.6	-0.1832001
122.8	0.6436071	122.8	0.5990019	122.8	0.6245918	122.8	0.6607681	122.8	0.6034294	122.8	0.6764221	122.8	0.6979555	122.8	-0.216785	122.8	-0.1979085	122.8	-0.2535145	122.8	-0.2056932	122.8	-0.1796509	122.8	-0.2127593	122.8	-0.1741042	122.8	-0.1689307	122.8	-0.1816459
123	0.6458475	123	0.5973166	123	0.6343451	123	0.6627429	123	0.6066989	123	0.6742911	123	0.6972633	123	-0.2201228	123	-0.1912956	123	-0.255837	123	-0.2051872	123	-0.1778544	123	-0.2146811	123	-0.1723567	123	-0.1713622	123	-0.1808401
123.2	0.6486718	123.2	0.6001658	123.2	0.6375958	123.2	0.6629189	123.2	0.6071712	123.2	0.6825106	123.2	0.6981607	123.2	-0.2161698	123.2	-0.196714	123.2	-0.2538101	123.2	-0.2017333	123.2	-0.1768564	123.2	-0.2129223	123.2	-0.1759304	123.2	-0.1724024	123.2	-0.1814343
123.4	0.6473228	123.4	0.6018946	123.4	0.6402282	123.4	0.6713127	123.4	0.6128799	123.4	0.682191	123.4	0.7042016	123.4	-0.2173019	123.4	-0.1981187	123.4	-0.2568176	123.4	-0.2036001	123.4	-0.1789737	123.4	-0.2118776	123.4	-0.1717873	123.4	-0.170827	123.4	-0.1805619
123.6	0.6529508	123.6	0.6074442	123.6	0.6397375	123.6	0.6688138	123.6	0.6172894	123.6	0.679563	123.6	0.7042146	123.6	-0.2188102	123.6	-0.1900696	123.6	-0.2558667	123.6	-0.2043486	123.6	-0.1741224	123.6	-0.2158857	123.6	-0.1741812	123.6	-0.169306	123.6	-0.1810322
123.8	0.6533832	123.8	0.6093388	123.8	0.6462379	123.8	0.6729695	123.8	0.6183792	123.8	0.6858914	123.8	0.7121663	123.8	-0.2120916	123.8	-0.1958662	123.8	-0.253402	123.8	-0.2006268	123.8	-0.1763948	123.8	-0.2176538	123.8	-0.1737072	123.8	-0.1737894	123.8	-0.1780001
124	0.6574493	124	0.6103599	124	0.6433544	124	0.6728218	124	0.618331	124	0.6932192	124	0.7082723	124	-0.2134318	124	-0.194243	124	-0.2490476	124	-0.2023169	124	-0.1733755	124	-0.2153328	124	-0.1753994	124	-0.1722493	124	-0.1801189
124.2	0.6634887	124.2	0.6135918	124.2	0.6527292	124.2	0.6791883	124.2	0.6254406	124.2	0.6908001	124.2	0.7087148	124.2	-0.2149179	124.2	-0.1949598	124.2	-0.2532436	124.2	-0.2034009	124.2	-0.179916	124.2	-0.2176034	124.2	-0.1715434	124.2	-0.1726799	124.2	-0.177443
124.4	0.661963	124.4	0.6177503	124.4	0.650454	124.4	0.6834007	124.4	0.6260875	124.4	0.6914008	124.4	0.717254	124.4	-0.2183528	124.4	-0.1963761	124.4	-0.2512356	124.4	-0.2016647	124.4	-0.1741733	124.4	-0.2099485	124.4	-0.1748245	124.4	-0.1676648	124.4	-0.1768709
124.6	0.6622149	124.6	0.6197388	124.6	0.6543208	124.6	0.683665	124.6	0.6268564	124.6	0.7008878	124.6	0.718615	124.6	-0.2174302	124.6	-0.1964066	124.6	-0.2524493	124.6	-0.2041529	124.6	-0.1764767	124.6	-0.2113166	124.6	-0.1709282	124.6	-0.1693086	124.6	-0.1795517
124.8	0.6656061	124.8	0.6211026	124.8	0.6575336	124.8	0.6853682	124.8	0.6327075	124.8	0.6996242	124.8	0.7199306	124.8	-0.2167681	124.8	-0.1955019	124.8	-0.2549351	124.8	-0.2026972	124.8	-0.1700823	124.8	-0.2134399	124.8	-0.172002	124.8	-0.1723426	124.8	-0.181474
125	0.671892	125	0.629943	125	0.6607295	125	0.6930057	125	0.6344268	125	0.7040549	125	0.7220274	125	-0.215083	125	-0.192793	125	-0.2553214	125	-0.2011624	125	-0.1751241	125	-0.2081027	125	-0.1774537	125	-0.1697554	125	-0.1807001
125.2	0.6763798	125.2	0.6297622	125.2	0.6612477	125.2	0.693729	125.2	0.6392642	125.2	0.7065582	125.2	0.7209457	125.2	-0.2130642	125.2	-0.1900111	125.2	-0.2497268	125.2	-0.2077806	125.2	-0.1735379	125.2	-0.2093542	125.2	-0.1756189	125.2	-0.1694335	125.2	-0.1786584
125.4	0.6734608	125.4	0.6348966	125.4	0.6609349	125.4	0.6916338	125.4	0.6374453	125.4	0.7043	125.4	0.7309339	125.4	-0.214714	125.4	-0.1921219	125.4	-0.2513762	125.4	-0.2015212	125.4	-0.1727912	125.4	-0.2120059	125.4	-0.1740796	125.4	-0.1675864	125.4	-0.178794
125.6	0.6773071	125.6	0.6362658	125.6	0.6673449	125.6	0.6980728	125.6	0.6437398	125.6	0.7090641	125.6	0.7340128	125.6	-0.2143894	125.6	-0.1951429	125.6	-0.2479189	125.6	-0.1987833	125.6	-0.1712505	125.6	-0.2149369	125.6	-0.1737103	125.6	-0.1676024	125.6	-0.1801662
125.8	0.6791796	125.8	0.6344021	125.8	0.6669932	125.8	0.6968448	125.8	0.6456398	125.8	0.7104708	125.8	0.7371812	125.8	-0.2224608	125.8	-0.1922901	125.8	-0.2462039	125.8	-0.2022787	125.8	-0.1748095	125.8	-0.2088242	125.8	-0.1726637	125.8	-0.168135	125.8	-0.1774407
126	0.6840267	126	0.6376932	126	0.6748896	126	0.6982229	126	0.6475424	126	0.7137123	126	0.7334627	126	-0.2162708	126	-0.192517	126	-0.2508976	126	-0.2044649	126	-0.1695631	126	-0.2090141	126	-0.1709626	126	-0.1677866	126	-0.1795548
126.2	0.6892365	126.2	0.6450923	126.2	0.6741949	126.2	0.7053515	126.2	0.6518512	126.2	0.7193564	126.2	0.7405239	126.2	-0.2119573	126.2	-0.191712	126.2	-0.2537392	126.2	-0.2040259	126.2	-0.1754937	126.2	-0.2095941	126.2	-0.1716161	126.2	-0.1677958	126.2	-0.1720539
126.4	0.6859788	126.4	0.640241	126.4	0.680753	126.4	0.7065673	126.4	0.6533013	126.4	0.7180325	126.4	0.7396715	126.4	-0.2113211	126.4	-0.1925158	126.4	-0.2487798	126.4	-0.2021142	126.4	-0.171854	126.4	-0.2122352	126.4	-0.1766681	126.4	-0.1689898	126.4	-0.1757824
126.6	0.6889143	126.6	0.6478443	126.6	0.6829112	126.6	0.705698	126.6	0.6542283	126.6	0.7188861	126.6	0.7437465	126.6	-0.2151706	126.6	-0.1888175	126.6	-0.247665	126.6	-0.2036508	126.6	-0.1704454	126.6	-0.2114249	126.6	-0.1755019	126.6	-0.1652898	126.6	-0.1765703
126.8	0.6943085	126.8	0.6482615	126.8	0.6835008	126.8	0.7107779	126.8	0.6522688	126.8	0.7259388	126.8	0.7481768	126.8	-0.2101176	126.8	-0.1930663	126.8	-0.2499687	126.8	-0.2009331	126.8	-0.1686542	126.8	-0.2085019	126.8	-0.1761955	126.8	-0.1698008	126.8	-0.1814284
127	0.6921726	127	0.6482552	127	0.6841207	127	0.7127958	127	0.6570889	127	0.7267657	127	0.7526434	127	-0.2136155	127	-0.1911957	127	-0.2483323	127	-0.2011341	127	-0.1714446	127	-0.2071715	127	-0.1723454	127	-0.1644069	127	-0.1762983
127.2	0.6958651	127.2	0.651651	127.2	0.6845091	127.2	0.7169136	127.2	0.661994	127.2	0.7280471	127.2	0.7509404	127.2	-0.2081661	127.2	-0.1880168	127.2	-0.2454736	127.2	-0.1980937	127.2	-0.16745	127.2	-0.2082534	127.2	-0.1664114	127.2	-0.1668632	127.2	-0.1775587
127.4	0.7043503	127.4	0.6530872	127.4	0.6923455	127.4	0.718225	127.4	0.6622826	127.4	0.7292801	127.4	0.7490125	127.4	-0.2074381	127.4	-0.1862479	127.4	-0.2523218	127.4	-0.1965371	127.4	-0.1682674	127.4	-0.205542	127.4	-0.1728337	127.4	-0.1677328	127.4	-0.1748535
127.6	0.6956	127.6	0.6586697	127.6	0.6966724	127.6	0.7224053	127.6	0.6634415	127.6	0.7339667	127.6	0.7547765	127.6	-0.2100834	127.6	-0.1867073	127.6	-0.2459212	127.6	-0.1978523	127.6	-0.1703392	127.6	-0.2082388	127.6	-0.171943	127.6	-0.1630786	127.6	-0.1754159
127.8	0.7048396	127.8	0.6635395	127.8	0.7026695	127.8	0.7210434	127.8	0.6669688	127.8	0.7355655	127.8	0.7550045	127.8	-0.2116816	127.8	-0.1893234	127.8	-0.2518429	127.8	-0.2013875	127.8	-0.1730092	127.8	-0.2106916	127.8	-0.1709935	127.8	-0.1704167	127.8	-0.1744206
128	0.7082916	128	0.6652132	128	0.6946123	128	0.7281724	128	0.6747937	128	0.7390931	128	0.7585452	128	-0.2045788	128	-0.1860475	128	-0.2445224	128	-0.1970674	128	-0.1703223	128	-0.2098895	128	-0.1689175	128	-0.1624844	128	-0.1756608
128.2	0.7090039	128.2	0.6644003	128.2	0.7004914	128.2	0.7254767	128.2	0.6715757	128.2	0.7372482	128.2	0.7659463	128.2	-0.2082567	128.2	-0.1872662	128.2	-0.2501413	128.2	-0.2009012	128.2	-0.1706461	128.2	-0.2074772	128.2	-0.1692804	128.2	-0.1647037	128.2	-0.1766914
128.4	0.7099055	128.4	0.666017	128.4	0.7017451	128.4	0.7287356	128.4	0.6754609	128.4	0.748612	128.4	0.7642515	128.4	-0.2104339	128.4	-0.1867674	128.4	-0.2466598	128.4	-0.1993405	128.4	-0.1701838	128.4	-0.2080717	128.4	-0.1692427	128.4	-0.1669947	128.4	-0.17429
128.6	0.7153494	128.6	0.6652686	128.6	0.7060947	128.6	0.729768	128.6	0.673263	128.6	0.7465758	128.6	0.7631567	128.6	-0.2118758	128.6	-0.188721	128.6	-0.2470475	128.6	-0.1960984	128.6	-0.1689362	128.6	-0.2081903	128.6	-0.1690777	128.6	-0.1675383	128.6	-0.1740898
128.8	0.7136129	128.8	0.6746687	128.8	0.7093617	128.8	0.7341117	128.8	0.6720747	128.8	0.7452628	128.8	0.7723302	128.8	-0.2130032	128.8	-0.184689	128.8	-0.2462174	128.8	-0.1978287	128.8	-0.1646263	128.8	-0.2032901	128.8	-0.1690875	128.8	-0.1624043	128.8	-0.1757817
129	0.7220935	129	0.6758778	129	0.7098167	129	0.7412586	129	0.672936	129	0.751272	129	0.7705078	129	-0.2088889	129	-0.1876891	129	-0.2477383	129	-0.1962434	129	-0.1677816	129	-0.2077482	129	-0.1670009	129	-0.1642024	129	-0.1755169
129.2	0.7190012	129.2	0.6756362	129.2	0.7161022	129.2	0.7388831	129.2	0.6837732	129.2	0.7522304	129.2	0.7746685	129.2	-0.2068981	129.2	-0.18932	129.2	-0.2512976	129.2	-0.19803	129.2	-0.1660624	129.2	-0.2070387	129.2	-0.1703296	129.2	-0.1664989	129.2	-0.1750705
129.4	0.7193253	129.4	0.6799994	129.4	0.7169477	129.4	0.7382716	129.4	0.6857284	129.4	0.7555745	129.4	0.7733954	129.4	-0.2083243	129.4	-0.1882388	129.4	-0.2471091	129.4	-0.1944566	129.4	-0.1679057	129.4	-0.2035556	129.4	-0.1693702	129.4	-0.1661135	129.4	-0.1748612
129.6	0.7227834	129.6	0.6809678	129.6	0.7175808	129.6	0.7448923	129.6	0.6861511	129.6	0.7572027	129.6	0.7759583	129.6	-0.2090001	129.6	-0.1881258	129.6	-0.2436322	129.6	-0.1993216	129.6	-0.1636592	129.6	-0.2032459	129.6	-0.1668932	129.6	-0.1660906	129.6	-0.169014
129.8	0.7272794	129.8	0.681851	129.8	0.719833	129.8	0.7419879	129.8	0.689566	129.8	0.7618155	129.8	0.7844118	129.8	-0.2138472	129.8	-0.1878693	129.8	-0.2465589	129.8	-0.1946946	129.8	-0.1687671	129.8	-0.2012894	129.8	-0.1705309	129.8	-0.164675	129.8	-0.1735716
130	0.7270778	130	0.6868438	130	0.7227493	130	0.7505685	130	0.6901227	130	0.7639645	130	0.7833783	130	-0.2083732	130	-0.1857356	130	-0.2485112	130	-0.195549	130	-0.1719079	130	-0.2024337	130	-0.168784	130	-0.15657	130	-0.1767411
130.2	0.7289252	130.2	0.6856382	130.2	0.724272	130.2	0.7478034	130.2	0.6888885	130.2	0.7644581	130.2	0.7865786	130.2	-0.2097457	130.2	-0.1926534	130.2	-0.2441179	130.2	-0.1963398	130.2	-0.1663789	130.2	-0.2092918	130.2	-0.1698088	130.2	-0.1611942	130.2	-0.1749124
130.4	0.7304935	130.4	0.6892595	130.4	0.7248348	130.4	0.7493091	130.4	0.6940338	130.4	0.7639904	130.4	0.7872081	130.4	-0.2094109	130.4	-0.1873487	130.4	-0.2480389	130.4	-0.1952377	130.4	-0.1651276	130.4	-0.2065918	130.4	-0.168635	130.4	-0.1638659	130.4	-0.1710669
130.6	0.7312481	130.6	0.6903455	130.6	0.7291243	130.6	0.7522091	130.6	0.6976303	130.6	0.7708209	130.6	0.7880399	130.6	-0.2087747	130.6	-0.1829606	130.6	-0.2442063	130.6	-0.1965487	130.6	-0.1694646	130.6	-0.2071003	130.6	-0.1683246	130.6	-0.1582331	130.6	-0.1739842
130.8	0.7383515	130.8	0.696111	130.8	0.7264189	130.8	0.7555909	130.8	0.6976869	130.8	0.7680598	130.8	0.7893697	130.8	-0.2074978	130.8	-0.1881528	130.8	-0.2425384	130.8	-0.1927817	130.8	-0.1635044	130.8	-0.2058281	130.8	-0.1692872	130.8	-0.1597408	130.8	-0.1671785
131	0.7390159	131	0.6951206	131	0.7361606	131	0.7602104	131	0.7005799	131	0.7664955	131	0.792405	131	-0.2076516	131	-0.1860081	131	-0.2450844	131	-0.1935897	131	-0.1662363	131	-0.2032185	131	-0.1689494	131	-0.1570411	131	-0.1685932
131.2	0.7377207	131.2	0.6963363	131.2	0.7361212	131.2	0.7598061	131.2	0.7050993	131.2	0.7772548	131.2	0.7960514	131.2	-0.2095084	131.2	-0.1835358	131.2	-0.2433003	131.2	-0.1948274	131.2	-0.1651377	131.2	-0.2048386	131.2	-0.1688744	131.2	-0.1577437	131.2	-0.1662892
131.4	0.7430333	131.4	0.6979355	131.4	0.7409603	131.4	0.7563037	131.4	0.7075042	131.4	0.776096	131.4	0.7969102	131.4	-0.2099754	131.4	-0.1825601	131.4	-0.2447125	131.4	-0.1918909	131.4	-0.1645153	131.4	-0.203512	131.4	-0.165502	131.4	-0.1611219	131.4	-0.1727624
131.6	0.7447641	131.6	0.7004814	131.6	0.7398403	131.6	0.7632513	131.6	0.7060294	131.6	0.7776324	131.6	0.7959713	131.6	-0.2092568	131.6	-0.1863452	131.6	-0.241333	131.6	-0.1917014	131.6	-0.1645234	131.6	-0.1976168	131.6	-0.1649049	131.6	-0.1573969	131.6	-0.1672411
131.8	0.7517626	131.8	0.6997759	131.8	0.745922	131.8	0.7717389	131.8	0.7059635	131.8	0.7788472	131.8	0.7999395	131.8	-0.207201	131.8	-0.1834736	131.8	-0.2436624	131.8	-0.1906204	131.8	-0.1647832	131.8	-0.2049048	131.8	-0.1644916	131.8	-0.1609844	131.8	-0.168808
132	0.7438847	132	0.7028871	132	0.7423735	132	0.7676622	132	0.7104511	132	0.7787897	132	0.8014494	132	-0.2087769	132	-0.1840914	132	-0.2428055	132	-0.1893056	132	-0.1661914	132	-0.198782	132	-0.162685	132	-0.1581581	132	-0.1688577
132.2	0.7499636	132.2	0.7065406	132.2	0.7407767	132.2	0.7682251	132.2	0.7143795	132.2	0.7778165	132.2	0.8060042	132.2	-0.2100099	132.2	-0.1824294	132.2	-0.2391645	132.2	-0.1867267	132.2	-0.1661356	132.2	-0.2023932	132.2	-0.166383	132.2	-0.1607919	132.2	-0.1720926
132.4	0.7552859	132.4	0.7127224	132.4	0.7455423	132.4	0.7742165	132.4	0.7174761	132.4	0.7849502	132.4	0.8090855	132.4	-0.2075181	132.4	-0.1834704	132.4	-0.2441648	132.4	-0.1930497	132.4	-0.160686	132.4	-0.1981622	132.4	-0.1620317	132.4	-0.1625772	132.4	-0.1694475
132.6	0.750196	132.6	0.7109795	132.6	0.7479002	132.6	0.7709255	132.6	0.7161629	132.6	0.7863123	132.6	0.8048543	132.6	-0.2045794	132.6	-0.1865188	132.6	-0.2445212	132.6	-0.1942495	132.6	-0.1656325	132.6	-0.1997871	132.6	-0.1608137	132.6	-0.1538146	132.6	-0.1720705
132.8	0.7589566	132.8	0.7083334	132.8	0.7467723	132.8	0.7768338	132.8	0.7149819	132.8	0.7877008	132.8	0.8100065	132.8	-0.2038774	132.8	-0.1846215	132.8	-0.2399771	132.8	-0.1915784	132.8	-0.1639228	132.8	-0.1988328	132.8	-0.1617679	132.8	-0.1575473	132.8	-0.1696394
133	0.7589998	133	0.716799	133	0.7506183	133	0.7781757	133	0.7192733	133	0.7913663	133	0.8089204	133	-0.2037401	133	-0.1794049	133	-0.2431065	133	-0.1905553	133	-0.1628863	133	-0.2017777	133	-0.1662368	133	-0.1565415	133	-0.167908
133.2	0.7573754	133.2	0.7171128	133.2	0.7572336	133.2	0.7851838	133.2	0.7231832	133.2	0.7926729	133.2	0.817827	133.2	-0.2035593	133.2	-0.1792417	133.2	-0.2408208	133.2	-0.188584	133.2	-0.1636998	133.2	-0.2009994	133.2	-0.1614552	133.2	-0.1544598	133.2	-0.1663367
133.4	0.757214	133.4	0.7196244	133.4	0.7574062	133.4	0.78174	133.4	0.7307758	133.4	0.7941369	133.4	0.8134086	133.4	-0.2047821	133.4	-0.1823502	133.4	-0.2425909	133.4	-0.1963616	133.4	-0.1637066	133.4	-0.2020687	133.4	-0.1614118	133.4	-0.1602913	133.4	-0.1728222
133.6	0.7681682	133.6	0.714902	133.6	0.7583557	133.6	0.7886741	133.6	0.7254044	133.6	0.797208	133.6	0.8207495	133.6	-0.2027078	133.6	-0.1797994	133.6	-0.2399883	133.6	-0.1872479	133.6	-0.1621455	133.6	-0.1976204	133.6	-0.1639174	133.6	-0.1550486	133.6	-0.1707119
133.8	0.7697341	133.8	0.7250357	133.8	0.7598411	133.8	0.7856601	133.8	0.7257875	133.8	0.7993259	133.8	0.8187764	133.8	-0.2065561	133.8	-0.1838221	133.8	-0.2414064	133.8	-0.1875873	133.8	-0.1630023	133.8	-0.2029332	133.8	-0.1627959	133.8	-0.1550696	133.8	-0.1702759
134	0.7643155	134	0.7291384	134	0.7618699	134	0.7870316	134	0.7306915	134	0.802308	134	0.8243293	134	-0.2039588	134	-0.1814148	134	-0.2440743	134	-0.1905041	134	-0.1663422	134	-0.1979963	134	-0.159257	134	-0.1573501	134	-0.1676804
134.2	0.7722999	134.2	0.729371	134.2	0.7656927	134.2	0.7925609	134.2	0.7280278	134.2	0.8068079	134.2	0.8225515	134.2	-0.2017162	134.2	-0.1783992	134.2	-0.2416746	134.2	-0.1923719	134.2	-0.1687542	134.2	-0.1975985	134.2	-0.1585673	134.2	-0.1552049	134.2	-0.1706827
134.4	0.7694663	134.4	0.7251995	134.4	0.7694235	134.4	0.7881016	134.4	0.7338826	134.4	0.8015642	134.4	0.8246737	134.4	-0.2036324	134.4	-0.1780675	134.4	-0.241808	134.4	-0.1877401	134.4	-0.1596413	134.4	-0.1981181	134.4	-0.1625411	134.4	-0.1569249	134.4	-0.1681691
134.6	0.7718884	134.6	0.7301273	134.6	0.7659486	134.6	0.7887971	134.6	0.7390574	134.6	0.8086908	134.6	0.8280649	134.6	-0.2028486	134.6	-0.1852246	134.6	-0.2375928	134.6	-0.1894509	134.6	-0.1623054	134.6	-0.1999667	134.6	-0.1559545	134.6	-0.1523153	134.6	-0.1682732
134.8	0.7738087	134.8	0.7310182	134.8	0.7693585	134.8	0.7953666	134.8	0.7386524	134.8	0.8107484	134.8	0.8282812	134.8	-0.203309	134.8	-0.1814701	134.8	-0.2411581	134.8	-0.1864496	134.8	-0.1594308	134.8	-0.204069	134.8	-0.1655376	134.8	-0.1554196	134.8	-0.1709788
135	0.7753308	135	0.7355812	135	0.772594	135	0.7941155	135	0.7356692	135	0.8094876	135	0.8309258	135	-0.2008361	135	-0.1788918	135	-0.2366745	135	-0.1883607	135	-0.1596766	135	-0.2005653	135	-0.1602545	135	-0.1525348	135	-0.1679459
135.2	0.7798406	135.2	0.7394454	135.2	0.7741703	135.2	0.7971834	135.2	0.7382612	135.2	0.8073897	135.2	0.8351666	135.2	-0.2007809	135.2	-0.1814348	135.2	-0.2360846	135.2	-0.1945799	135.2	-0.1621463	135.2	-0.1986761	135.2	-0.1627551	135.2	-0.1550623	135.2	-0.1696305
135.4	0.7818413	135.4	0.739606	135.4	0.7835186	135.4	0.8008718	135.4	0.7443162	135.4	0.8144079	135.4	0.8348673	135.4	-0.2021202	135.4	-0.1812391	135.4	-0.2418273	135.4	-0.1877317	135.4	-0.160553	135.4	-0.1950296	135.4	-0.1577949	135.4	-0.1495206	135.4	-0.1626913
135.6	0.7833367	135.6	0.7440141	135.6	0.7774454	135.6	0.8020963	135.6	0.7453876	135.6	0.8217585	135.6	0.8375253	135.6	-0.1969339	135.6	-0.1779591	135.6	-0.2440606	135.6	-0.1898326	135.6	-0.1578483	135.6	-0.1999044	135.6	-0.1615113	135.6	-0.1518773	135.6	-0.1693484
135.8	0.7861197	135.8	0.7417491	135.8	0.7786032	135.8	0.7991276	135.8	0.7455977	135.8	0.8168074	135.8	0.8418794	135.8	-0.1989456	135.8	-0.1767019	135.8	-0.2441492	135.8	-0.1863886	135.8	-0.1596601	135.8	-0.1952578	135.8	-0.1604598	135.8	-0.156499	135.8	-0.1669948
136	0.784907	136	0.7425801	136	0.782636	136	0.8040312	136	0.7504109	136	0.8204473	136	0.8376045	136	-0.2016178	136	-0.1794584	136	-0.236086	136	-0.1876441	136	-0.1595663	136	-0.1957155	136	-0.1602671	136	-0.1525266	136	-0.1630894
136.2	0.7897131	136.2	0.7461002	136.2	0.7808939	136.2	0.8062031	136.2	0.7559276	136.2	0.8237969	136.2	0.8463508	136.2	-0.2036131	136.2	-0.1772055	136.2	-0.2363568	136.2	-0.1866673	136.2	-0.1562888	136.2	-0.1956022	136.2	-0.1628464	136.2	-0.1515214	136.2	-0.1656697
136.4	0.7918397	136.4	0.7452364	136.4	0.7882783	136.4	0.8053772	136.4	0.7523	136.4	0.8229025	136.4	0.842941	136.4	-0.2009122	136.4	-0.1792279	136.4	-0.2382962	136.4	-0.1889625	136.4	-0.1606327	136.4	-0.1965869	136.4	-0.1577342	136.4	-0.1550647	136.4	-0.1637769
136.6	0.7915108	136.6	0.7480766	136.6	0.7850247	136.6	0.8096594	136.6	0.7558886	136.6	0.8222514	136.6	0.8479136	136.6	-0.1997439	136.6	-0.1779399	136.6	-0.2370656	136.6	-0.1883243	136.6	-0.1593515	136.6	-0.1962354	136.6	-0.161487	136.6	-0.1558269	136.6	-0.1676116
136.8	0.7946258	136.8	0.751709	136.8	0.7903463	136.8	0.8100287	136.8	0.7601428	136.8	0.8237821	136.8	0.8476375	136.8	-0.1967356	136.8	-0.1753041	136.8	-0.2359716	136.8	-0.1806998	136.8	-0.1615261	136.8	-0.1942087	136.8	-0.1542931	136.8	-0.1497165	136.8	-0.164923
137	0.7969438	137	0.7539068	137	0.7891319	137	0.815751	137	0.7545258	137	0.8266309	137	0.8490903	137	-0.1996652	137	-0.1761448	137	-0.2306359	137	-0.1882831	137	-0.1563463	137	-0.1978788	137	-0.1610935	137	-0.1537876	137	-0.1678972
137.2	0.7934403	137.2	0.7554585	137.2	0.7876109	137.2	0.8123935	137.2	0.7625418	137.2	0.8314376	137.2	0.8498901	137.2	-0.1995262	137.2	-0.1745562	137.2	-0.2348456	137.2	-0.1842958	137.2	-0.158603	137.2	-0.1997793	137.2	-0.1595492	137.2	-0.1501358	137.2	-0.1639139
137.4	0.7991734	137.4	0.7543932	137.4	0.7948067	137.4	0.8158056	137.4	0.7596616	137.4	0.8316038	137.4	0.8542141	137.4	-0.200382	137.4	-0.17627	137.4	-0.2377388	137.4	-0.1885041	137.4	-0.159045	137.4	-0.1988946	137.4	-0.1608672	137.4	-0.1527219	137.4	-0.1658218
137.6	0.8013256	137.6	0.7607516	137.6	0.7991891	137.6	0.8238915	137.6	0.7655483	137.6	0.8362419	137.6	0.8555115	137.6	-0.2017422	137.6	-0.1798781	137.6	-0.2348126	137.6	-0.1859392	137.6	-0.1594427	137.6	-0.1902451	137.6	-0.1549478	137.6	-0.14901	137.6	-0.1633468
137.8	0.803803	137.8	0.7604706	137.8	0.8011479	137.8	0.818667	137.8	0.7634696	137.8	0.8367697	137.8	0.8513741	137.8	-0.2024124	137.8	-0.1747309	137.8	-0.2347511	137.8	-0.1877694	137.8	-0.1581546	137.8	-0.1953706	137.8	-0.1608537	137.8	-0.1547105	137.8	-0.1630715
138	0.8028514	138	0.76365	138	0.7992527	138	0.8240533	138	0.7671146	138	0.8321869	138	0.8566846	138	-0.2028545	138	-0.1755845	138	-0.2322602	138	-0.1856684	138	-0.1593065	138	-0.1928459	138	-0.1561829	138	-0.1475543	138	-0.1634848
138.2	0.8030838	138.2	0.7619436	138.2	0.8032325	138.2	0.8198696	138.2	0.77019	138.2	0.8368605	138.2	0.8629127	138.2	-0.1986505	138.2	-0.1748191	138.2	-0.2344058	138.2	-0.1854603	138.2	-0.1600966	138.2	-0.191745	138.2	-0.1564081	138.2	-0.1503876	138.2	-0.157278
138.4	0.8074865	138.4	0.7656977	138.4	0.8011323	138.4	0.8235431	138.4	0.7764449	138.4	0.8403006	138.4	0.8617804	138.4	-0.2027576	138.4	-0.1742629	138.4	-0.2282968	138.4	-0.1863651	138.4	-0.1565959	138.4	-0.1945272	138.4	-0.1609887	138.4	-0.1471772	138.4	-0.1646513
138.6	0.8064273	138.6	0.7673338	138.6	0.809164	138.6	0.8243215	138.6	0.774905	138.6	0.8426108	138.6	0.8607628	138.6	-0.2006832	138.6	-0.1719461	138.6	-0.233001	138.6	-0.1854824	138.6	-0.1570937	138.6	-0.1922081	138.6	-0.1596079	138.6	-0.1539023	138.6	-0.1613173
138.8	0.8093321	138.8	0.7731813	138.8	0.8035657	138.8	0.8323793	138.8	0.7741976	138.8	0.8410693	138.8	0.8679054	138.8	-0.1962606	138.8	-0.1804492	138.8	-0.2322572	138.8	-0.1837851	138.8	-0.1580825	138.8	-0.1909532	138.8	-0.1551711	138.8	-0.1498284	138.8	-0.1661197
139	0.8121424	139	0.7696131	139	0.8105334	139	0.8309688	139	0.7723159	139	0.8454393	139	0.8680912	139	-0.2021731	139	-0.1727005	139	-0.2355236	139	-0.1893739	139	-0.1547854	139	-0.1916399	139	-0.1538777	139	-0.1536966	139	-0.1625342
139.2	0.8124302	139.2	0.7748836	139.2	0.8099881	139.2	0.8306755	139.2	0.7753522	139.2	0.8475213	139.2	0.8641718	139.2	-0.2011297	139.2	-0.1730954	139.2	-0.23371	139.2	-0.1838008	139.2	-0.1600505	139.2	-0.1926817	139.2	-0.1613503	139.2	-0.1531007	139.2	-0.1583849
139.4	0.8112122	139.4	0.7758235	139.4	0.8130383	139.4	0.83105	139.4	0.7788226	139.4	0.8505277	139.4	0.8751773	139.4	-0.2029425	139.4	-0.1731687	139.4	-0.2332294	139.4	-0.1866165	139.4	-0.1527019	139.4	-0.1878669	139.4	-0.1533205	139.4	-0.1518132	139.4	-0.1627268
139.6	0.8178793	139.6	0.775677	139.6	0.8135843	139.6	0.8354487	139.6	0.7762977	139.6	0.8509137	139.6	0.8726375	139.6	-0.1938882	139.6	-0.1732437	139.6	-0.2324532	139.6	-0.1889779	139.6	-0.1559736	139.6	-0.1907855	139.6	-0.1553983	139.6	-0.1493963	139.6	-0.1631902
139.8	0.8183267	139.8	0.7759644	139.8	0.8133257	139.8	0.8354778	139.8	0.77886	139.8	0.8504851	139.8	0.8747469	139.8	-0.1965884	139.8	-0.1730993	139.8	-0.233943	139.8	-0.1791456	139.8	-0.1589727	139.8	-0.1896728	139.8	-0.1501888	139.8	-0.1513785	139.8	-0.1617796
140	0.8212703	140	0.7758874	140	0.8182871	140	0.8387879	140	0.7816321	140	0.8559145	140	0.8782828	140	-0.1978852	140	-0.1717871	140	-0.2322174	140	-0.1850619	140	-0.1537547	140	-0.1908578	140	-0.1561465	140	-0.1492123	140	-0.1641648
140.2	0.8245531	140.2	0.7824134	140.2	0.8260017	140.2	0.8401338	140.2	0.7855476	140.2	0.8556945	140.2	0.8774583	140.2	-0.1957674	140.2	-0.1746	140.2	-0.2320081	140.2	-0.1835963	140.2	-0.1571329	140.2	-0.1911218	140.2	-0.1499386	140.2	-0.149754	140.2	-0.1631842
140.4	0.8257042	140.4	0.7811797	140.4	0.8223534	140.4	0.8422816	140.4	0.785539	140.4	0.8592409	140.4	0.8758114	140.4	-0.1923822	140.4	-0.1725187	140.4	-0.2337812	140.4	-0.1829744	140.4	-0.1562179	140.4	-0.1883512	140.4	-0.158161	140.4	-0.1471834	140.4	-0.1648714
140.6	0.8261627	140.6	0.7815597	140.6	0.8226035	140.6	0.8409519	140.6	0.7881361	140.6	0.8596373	140.6	0.8756791	140.6	-0.1963289	140.6	-0.1731579	140.6	-0.2321146	140.6	-0.1832716	140.6	-0.1554788	140.6	-0.1947952	140.6	-0.1533582	140.6	-0.1498545	140.6	-0.1579267
140.8	0.8254138	140.8	0.787562	140.8	0.8259224	140.8	0.8465006	140.8	0.7908157	140.8	0.8586428	140.8	0.8810855	140.8	-0.197212	140.8	-0.1732371	140.8	-0.2284884	140.8	-0.1866633	140.8	-0.155493	140.8	-0.1885836	140.8	-0.1524692	140.8	-0.1487724	140.8	-0.162296
141	0.8281578	141	0.7884793	141	0.8281024	141	0.8501118	141	0.7906749	141	0.86279	141	0.8811626	141	-0.1972886	141	-0.168887	141	-0.2305785	141	-0.1823012	141	-0.1549129	141	-0.1898073	141	-0.1526714	141	-0.146072	141	-0.1581542
141.2	0.8283641	141.2	0.7883134	141.2	0.8300847	141.2	0.8476093	141.2	0.7933343	141.2	0.8613151	141.2	0.8868459	141.2	-0.1932423	141.2	-0.172342	141.2	-0.2313305	141.2	-0.1848305	141.2	-0.1553327	141.2	-0.1899664	141.2	-0.1537963	141.2	-0.1507388	141.2	-0.1597904
141.4	0.8304507	141.4	0.7903398	141.4	0.831714	141.4	0.8488812	141.4	0.7948672	141.4	0.8625898	141.4	0.8871382	141.4	-0.1980752	141.4	-0.1757016	141.4	-0.2294519	141.4	-0.1812385	141.4	-0.1499451	141.4	-0.1961569	141.4	-0.152779	141.4	-0.1494929	141.4	-0.1613545
141.6	0.8362232	141.6	0.7878962	141.6	0.8337302	141.6	0.8558026	141.6	0.7938052	141.6	0.8699386	141.6	0.8895333	141.6	-0.1992068	141.6	-0.1659736	141.6	-0.2310177	141.6	-0.1783129	141.6	-0.1518733	141.6	-0.1906499	141.6	-0.149957	141.6	-0.1485143	141.6	-0.1605796
141.8	0.8359802	141.8	0.7943959	141.8	0.8312132	141.8	0.8558711	141.8	0.8008543	141.8	0.8713667	141.8	0.8885875	141.8	-0.2013153	141.8	-0.1736211	141.8	-0.2273406	141.8	-0.1815155	141.8	-0.1530976	141.8	-0.1852894	141.8	-0.1518019	141.8	-0.1458158	141.8	-0.1616666
142	0.8354894	142	0.7939329	142	0.8339206	142	0.8548905	142	0.7957097	142	0.8724304	142	0.8912922	142	-0.1974702	142	-0.1749277	142	-0.2328126	142	-0.1795855	142	-0.1523249	142	-0.1878112	142	-0.1560049	142	-0.1488239	142	-0.1616175
142.2	0.8347363	142.2	0.7970978	142.2	0.8394766	142.2	0.8555837	142.2	0.8037679	142.2	0.8692621	142.2	0.8886245	142.2	-0.1963028	142.2	-0.1667565	142.2	-0.2317737	142.2	-0.178545	142.2	-0.1560845	142.2	-0.1852964	142.2	-0.155667	142.2	-0.14901	142.2	-0.1643359
142.42	0.8382171	142.42	0.7988572	142.42	0.8389437	142.42	0.8543777	142.42	0.7994673	142.42	0.8723381	142.42	0.8952396	142.42	-0.1958505	142.4	-0.1687699	142.4	-0.2324048	142.4	-0.1827468	142.4	-0.154952	142.4	-0.1830153	142.4	-0.1481301	142.4	-0.1452289	142.4	-0.1589615
142.6	0.8428993	142.6	0.7996983	142.6	0.839814	142.6	0.8530484	142.6	0.8025497	142.6	0.8763365	142.6	0.8932418	142.6	-0.196335	142.6	-0.1697015	142.6	-0.2313032	142.6	-0.1831137	142.6	-0.1526691	142.6	-0.1919903	142.6	-0.1482586	142.6	-0.1462361	142.6	-0.1557389
142.8	0.8423635	142.8	0.8019174	142.8	0.8400711	142.8	0.8582698	142.8	0.807961	142.8	0.876249	142.8	0.8990321	142.8	-0.1934755	142.8	-0.1743117	142.8	-0.2316661	142.8	-0.1831892	142.8	-0.1511597	142.8	-0.1875916	142.8	-0.1507313	142.8	-0.1420121	142.8	-0.1590309
143	0.840438	143	0.8031707	143	0.843759	143	0.859228	143	0.8059127	143	0.881038	143	0.8988003	143	-0.1874118	143	-0.1707185	143	-0.227404	143	-0.1809527	143	-0.1543493	143	-0.186907	143	-0.1518934	143	-0.1453741	143	-0.1571611
143.2	0.8471435	143.2	0.8063734	143.2	0.8478968	143.2	0.8647645	143.2	0.8130093	143.2	0.8762853	143.2	0.8988342	143.2	-0.195197	143.2	-0.1688688	143.2	-0.234742	143.2	-0.1771893	143.2	-0.149172	143.2	-0.1860249	143.2	-0.1520247	143.2	-0.145427	143.2	-0.1575723
143.4	0.8497774	143.4	0.8060285	143.4	0.8460061	143.4	0.8628948	143.4	0.8076147	143.4	0.8794249	143.4	0.9039257	143.4	-0.1959201	143.4	-0.1713121	143.4	-0.2281251	143.4	-0.1785789	143.4	-0.1533613	143.4	-0.1893449	143.4	-0.1521238	143.4	-0.1459801	143.4	-0.1624941
143.6	0.8465994	143.6	0.8050402	143.6	0.847569	143.6	0.8703859	143.6	0.8076755	143.6	0.8841536	143.6	0.9067891	143.6	-0.1948316	143.6	-0.1674876	143.6	-0.2294303	143.6	-0.1791287	143.6	-0.1505567	143.6	-0.1873468	143.6	-0.1503759	143.6	-0.1417044	143.6	-0.1595771
143.8	0.8470032	143.8	0.8068435	143.8	0.8473717	143.8	0.8679574	143.8	0.8134484	143.8	0.8834907	143.8	0.9026389	143.8	-0.1968435	143.8	-0.1695534	143.8	-0.2265302	143.8	-0.1762033	143.8	-0.1504354	143.8	-0.1884458	143.8	-0.1489903	143.8	-0.1376512	143.8	-0.1569167
144	0.8521333	144	0.8071437	144	0.8527669	144	0.8672248	144	0.8149649	144	0.8882221	144	0.9050502	144	-0.1899023	144	-0.1690632	144	-0.2268902	144	-0.1777671	144	-0.1506888	144	-0.1865201	144	-0.1494012	144	-0.1451299	144	-0.1564867
144.2	0.8525568	144.2	0.8087419	144.2	0.8517678	144.2	0.8684033	144.2	0.8162642	144.2	0.8874725	144.2	0.9073292	144.2	-0.1933314	144.2	-0.1710509	144.2	-0.2253562	144.2	-0.1759475	144.2	-0.1491203	144.2	-0.1907123	144.2	-0.1492669	144.2	-0.1429318	144.2	-0.1596658
144.4	0.8487191	144.4	0.8139575	144.4	0.8522384	144.4	0.8718496	144.4	0.8150466	144.4	0.8863418	144.4	0.9085551	144.4	-0.1953668	144.4	-0.1714446	144.4	-0.2250376	144.4	-0.1778051	144.4	-0.1550797	144.4	-0.1888721	144.4	-0.1506263	144.4	-0.1510492	144.4	-0.1568635
144.6	0.8556099	144.6	0.8129069	144.6	0.852224	144.6	0.8753486	144.6	0.817873	144.6	0.8938549	144.6	0.9144586	144.6	-0.1932761	144.6	-0.1697224	144.6	-0.2253935	144.6	-0.1793147	144.6	-0.1532213	144.6	-0.1891782	144.6	-0.1488913	144.6	-0.1414051	144.6	-0.1565974
144.8	0.8566048	144.8	0.8177823	144.8	0.8557631	144.8	0.876631	144.8	0.8134317	144.8	0.8893811	144.8	0.9147218	144.8	-0.1927429	144.8	-0.1639207	144.8	-0.2256462	144.8	-0.1812465	144.8	-0.1476351	144.8	-0.1858108	144.8	-0.1523891	144.8	-0.1420877	144.8	-0.152043
145	0.8571395	145	0.8204872	145	0.8533302	145	0.8775755	145	0.822146	145	0.8965729	145	0.9175125	145	-0.1880453	145	-0.1696349	145	-0.2329362	145	-0.1770982	145	-0.14877	145	-0.1811792	145	-0.1497695	145	-0.1420663	145	-0.1575901
145.2	0.8623189	145.2	0.8121166	145.2	0.8591972	145.2	0.8794091	145.2	0.822324	145.2	0.894123	145.2	0.9170909	145.2	-0.193901	145.2	-0.1642704	145.2	-0.2252051	145.2	-0.1812134	145.2	-0.1499137	145.2	-0.1836002	145.2	-0.1522577	145.2	-0.1467629	145.2	-0.1570124
145.4	0.8627069	145.4	0.8202942	145.4	0.859335	145.4	0.8760773	145.4	0.8239011	145.4	0.8956274	145.4	0.9178253	145.4	-0.193026	145.4	-0.1681239	145.4	-0.22835	145.4	-0.1783166	145.4	-0.1494104	145.4	-0.1850594	145.4	-0.152245	145.4	-0.144935	145.4	-0.1551497
145.6	0.8663144	145.6	0.8232983	145.6	0.8603823	145.6	0.8804874	145.6	0.8270391	145.6	0.8956047	145.6	0.9170318	145.6	-0.1873047	145.6	-0.1671961	145.6	-0.2268579	145.6	-0.1796211	145.6	-0.1447507	145.6	-0.1888351	145.6	-0.1477452	145.6	-0.1437574	145.6	-0.1536952
145.8	0.867552	145.8	0.8220024	145.8	0.8666754	145.8	0.8750092	145.8	0.8293093	145.8	0.9006321	145.8	0.9177414	145.8	-0.1937342	145.8	-0.1716771	145.8	-0.2215159	145.8	-0.175862	145.8	-0.1479557	145.8	-0.1819063	145.8	-0.1495302	145.8	-0.1412693	145.8	-0.1579136
146	0.8635697	146	0.8261967	146	0.866493	146	0.882142	146	0.8327807	146	0.901822	146	0.9206254	146	-0.1907538	146	-0.1649938	146	-0.2224773	146	-0.1722611	146	-0.1478293	146	-0.1827914	146	-0.1492721	146	-0.1450442	146	-0.1548977
146.2	0.868501	146.2	0.8299287	146.2	0.8689482	146.2	0.8869799	146.2	0.8293785	146.2	0.9021036	146.2	0.9266316	146.2	-0.1870312	146.2	-0.1690681	146.2	-0.2283972	146.2	-0.1747764	146.2	-0.1439036	146.2	-0.1896544	146.2	-0.1454107	146.2	-0.1434505	146.2	-0.1580733
146.4	0.8669533	146.4	0.8244578	146.4	0.8679956	146.4	0.8815663	146.4	0.8315434	146.4	0.9053545	146.4	0.925566	146.4	-0.1891759	146.4	-0.1689166	146.4	-0.2204814	146.4	-0.173216	146.4	-0.1454528	146.4	-0.1868225	146.4	-0.1472311	146.4	-0.1397709	146.4	-0.1520167
146.6	0.8684073	146.6	0.8253946	146.6	0.8679591	146.6	0.8868698	146.6	0.8333295	146.6	0.9089875	146.6	0.9257945	146.6	-0.1886073	146.6	-0.1684202	146.6	-0.2232876	146.6	-0.1751387	146.6	-0.1500322	146.6	-0.1869125	146.6	-0.1474897	146.6	-0.1414928	146.6	-0.1554215
146.8	0.8733401	146.8	0.8327242	146.8	0.8693807	146.8	0.8877488	146.8	0.8349668	146.8	0.9082624	146.8	0.9288167	146.8	-0.1872166	146.8	-0.166768	146.8	-0.2244506	146.8	-0.1774158	146.8	-0.1504859	146.8	-0.1820277	146.8	-0.1462681	146.8	-0.1419616	146.8	-0.1536304
147	0.8731179	147	0.832588	147	0.8759115	147	0.8883017	147	0.8339324	147	0.9040449	147	0.9276201	147	-0.1870938	147	-0.1655741	147	-0.2222105	147	-0.175382	147	-0.1451435	147	-0.1876742	147	-0.1440403	147	-0.1384908	147	-0.1587164
147.2	0.8752995	147.2	0.8371013	147.2	0.8739176	147.2	0.8887038	147.2	0.8348644	147.2	0.9109808	147.2	0.9279799	147.2	-0.1926272	147.2	-0.1707246	147.2	-0.228372	147.2	-0.1766596	147.2	-0.1474485	147.2	-0.1817487	147.2	-0.1484425	147.2	-0.1395661	147.2	-0.1532068
147.4	0.8776413	147.4	0.8349176	147.4	0.87722	147.4	0.8949045	147.4	0.8355393	147.4	0.9111345	147.4	0.9286073	147.4	-0.1846255	147.4	-0.1660529	147.4	-0.2206582	147.4	-0.1726813	147.4	-0.1442999	147.4	-0.1839494	147.4	-0.1435092	147.4	-0.1404968	147.4	-0.1576323
147.6	0.8764375	147.6	0.8375843	147.6	0.8726154	147.6	0.8933644	147.6	0.8418915	147.6	0.9095864	147.6	0.9352252	147.6	-0.1931776	147.6	-0.1654655	147.6	-0.2249415	147.6	-0.1770329	147.6	-0.1493781	147.6	-0.1810875	147.6	-0.1433179	147.6	-0.141794	147.6	-0.1517024
147.8	0.8802042	147.8	0.8393083	147.8	0.8807895	147.8	0.8968232	147.8	0.8396803	147.8	0.9167396	147.8	0.9292385	147.8	-0.1902499	147.8	-0.1650205	147.8	-0.2198433	147.8	-0.1736026	147.8	-0.1496191	147.8	-0.1837189	147.8	-0.1462299	147.8	-0.1444284	147.8	-0.1473238
148	0.8810306	148	0.8387182	148	0.8805863	148	0.8986545	148	0.8383468	148	0.9139943	148	0.9377655	148	-0.1894983	148	-0.1622883	148	-0.2251577	148	-0.1780556	148	-0.1444388	148	-0.1833999	148	-0.1453983	148	-0.1422369	148	-0.1501791
148.2	0.885298	148.2	0.8418539	148.2	0.8788637	148.2	0.8982971	148.2	0.8421931	148.2	0.9158643	148.2	0.9389914	148.2	-0.1870896	148.2	-0.1651127	148.2	-0.2248966	148.2	-0.1725476	148.2	-0.1433146	148.2	-0.1802326	148.2	-0.15034	148.2	-0.1417355	148.2	-0.1537221
148.4	0.8850513	148.4	0.8401553	148.4	0.8827027	148.4	0.8969261	148.4	0.8370067	148.4	0.9140575	148.4	0.941492	148.4	-0.1864134	148.4	-0.1643025	148.4	-0.219057	148.4	-0.1727642	148.4	-0.144616	148.4	-0.186711	148.4	-0.1423766	148.4	-0.1396754	148.4	-0.1550333
148.6	0.8828446	148.6	0.8414369	148.6	0.8849545	148.6	0.9023432	148.6	0.84459	148.6	0.9212528	148.6	0.9392582	148.6	-0.1870862	148.6	-0.1623643	148.6	-0.2234232	148.6	-0.1762685	148.6	-0.1469567	148.6	-0.1799576	148.6	-0.1439627	148.6	-0.1368343	148.6	-0.1495247
148.8	0.8886493	148.8	0.8435748	148.8	0.8830839	148.8	0.9038308	148.8	0.8475391	148.8	0.9192147	148.8	0.9383424	148.8	-0.1866747	148.8	-0.1639577	148.8	-0.2226213	148.8	-0.1735737	148.8	-0.1493836	148.8	-0.1872849	148.8	-0.1458259	148.8	-0.1352184	148.8	-0.1550189
149	0.8858218	149	0.841905	149	0.8884755	149	0.9036507	149	0.8500045	149	0.922931	149	0.938287	149	-0.1874596	149	-0.1663403	149	-0.2220049	149	-0.1723451	149	-0.1486081	149	-0.1835707	149	-0.1471612	149	-0.1387054	149	-0.1505289
149.2	0.8868795	149.2	0.8451658	149.2	0.8857247	149.2	0.9050889	149.2	0.8528557	149.2	0.9252148	149.2	0.9399534	149.2	-0.1888373	149.2	-0.1648236	149.2	-0.2246577	149.2	-0.1690975	149.2	-0.1479199	149.2	-0.183694	149.2	-0.1445821	149.2	-0.1361518	149.2	-0.1538184
149.4	0.8882059	149.4	0.8512015	149.4	0.8855985	149.4	0.9051889	149.4	0.8542421	149.4	0.9227911	149.4	0.941457	149.4	-0.1833316	149.4	-0.1648545	149.4	-0.2224808	149.4	-0.175001	149.4	-0.1453469	149.4	-0.1797768	149.4	-0.143537	149.4	-0.134766	149.4	-0.1510891
149.6	0.8865505	149.6	0.8500097	149.6	0.889198	149.6	0.9059761	149.6	0.8527487	149.6	0.9302366	149.6	0.9398925	149.6	-0.1901695	149.6	-0.1612337	149.6	-0.2202663	149.6	-0.1722967	149.6	-0.1449944	149.6	-0.1871007	149.6	-0.1445965	149.6	-0.138707	149.6	-0.1509379
149.8	0.8884767	149.8	0.8481121	149.8	0.8887321	149.8	0.9054837	149.8	0.8534027	149.8	0.9310154	149.8	0.9470933	149.8	-0.1892132	149.8	-0.1618219	149.8	-0.2211762	149.8	-0.1719366	149.8	-0.1477002	149.8	-0.1804586	149.8	-0.1415133	149.8	-0.1384721	149.8	-0.1529101
150	0.8921071	150	0.8506436	150	0.8910716	150	0.9092026	150	0.8567251	150	0.9252121	150	0.9456928	150	-0.188964	150.01	-0.1671013	150.01	-0.222074	150.01	-0.1702249	150.01	-0.1427045	150.01	-0.1794576	150.01	-0.1430946	150.01	-0.1353451	150.01	-0.1511355
150.2	0.8950964	150.2	0.8542117	150.2	0.894926	150.2	0.9127498	150.2	0.859019	150.2	0.9264318	150.2	0.9488759	150.2	-0.1846821	150.2	-0.1613517	150.2	-0.2202837	150.2	-0.1679627	150.2	-0.1457799	150.2	-0.1802494	150.2	-0.147292	150.2	-0.136402	150.2	-0.1543342
150.4	0.8942956	150.4	0.855221	150.4	0.8988543	150.4	0.9142435	150.4	0.8539594	150.4	0.9333808	150.4	0.9559061	150.4	-0.1851194	150.4	-0.1581668	150.4	-0.2205178	150.4	-0.1707711	150.4	-0.1491276	150.4	-0.1812559	150.4	-0.1465545	150.4	-0.1391905	150.4	-0.1549908
150.6	0.8926527	150.6	0.8608066	150.6	0.8969101	150.6	0.9126511	150.6	0.8578896	150.6	0.9330279	150.6	0.9510919	150.6	-0.1857744	150.6	-0.1624289	150.6	-0.2225928	150.6	-0.1752642	150.6	-0.1428939	150.6	-0.1743341	150.6	-0.1447656	150.6	-0.1369188	150.6	-0.1545143
150.8	0.8971836	150.8	0.8609266	150.8	0.9005371	150.8	0.9162928	150.8	0.8589988	150.8	0.9337809	150.8	0.9520561	150.8	-0.1901563	150.8	-0.1653217	150.8	-0.2226242	150.8	-0.1722225	150.8	-0.142104	150.8	-0.1851553	150.8	-0.1425218	150.8	-0.138006	150.8	-0.1503502
151	0.8995355	151	0.8596498	151	0.8997221	151	0.9215343	151	0.8624089	151	0.9328417	151	0.9536343	151	-0.1923691	151	-0.1567344	151	-0.2186088	151	-0.1700497	151	-0.1411334	151	-0.1788892	151	-0.1382095	151	-0.1370561	151	-0.1502599
151.2	0.8987201	151.2	0.8606611	151.2	0.9024576	151.2	0.921997	151.2	0.8618577	151.2	0.9353445	151.2	0.956659	151.2	-0.1865536	151.2	-0.1579716	151.2	-0.2210138	151.2	-0.1735204	151.2	-0.1417064	151.2	-0.1815192	151.2	-0.1446493	151.2	-0.1339871	151.2	-0.1531754
151.4	0.8999595	151.4	0.8637176	151.4	0.90848	151.4	0.918119	151.4	0.8666587	151.4	0.935105	151.4	0.9626727	151.4	-0.190878	151.4	-0.1607312	151.4	-0.2196822	151.4	-0.1717439	151.4	-0.1414772	151.4	-0.1753591	151.4	-0.1427134	151.4	-0.1387435	151.4	-0.1488603
151.6	0.9022723	151.6	0.8618615	151.6	0.9049865	151.6	0.9186479	151.6	0.8686525	151.6	0.9363331	151.6	0.9559	151.6	-0.1818373	151.61	-0.161334	151.61	-0.2199303	151.61	-0.1726206	151.61	-0.1456933	151.61	-0.1764385	151.61	-0.140275	151.61	-0.1376401	151.61	-0.1507915
151.8	0.9024941	151.8	0.8672585	151.8	0.902691	151.8	0.9220187	151.8	0.8669345	151.8	0.9403118	151.8	0.9628794	151.8	-0.1866616	151.8	-0.1618208	151.8	-0.2218381	151.8	-0.1719915	151.8	-0.144939	151.8	-0.179407	151.8	-0.1436388	151.8	-0.1363934	151.8	-0.1501251
152	0.9012452	152	0.8652491	152	0.9055281	152	0.9225817	152	0.8664201	152	0.93962	152	0.9608746	152	-0.1858824	152	-0.1607679	152	-0.2158495	152	-0.1729832	152	-0.1422437	152	-0.17515	152	-0.1423613	152	-0.1373628	152	-0.1496627
152.2	0.9060398	152.2	0.865342	152.2	0.9098098	152.2	0.9208345	152.2	0.8692483	152.2	0.9444911	152.2	0.9596398	152.2	-0.1862378	152.2	-0.160288	152.2	-0.2197332	152.2	-0.1709615	152.2	-0.1454432	152.2	-0.1775843	152.2	-0.1383046	152.2	-0.1341785	152.2	-0.1473776
152.4	0.9062636	152.4	0.8673823	152.4	0.9069571	152.4	0.9306217	152.4	0.8697788	152.4	0.9417297	152.4	0.9637651	152.4	-0.1846811	152.4	-0.1603862	152.4	-0.218219	152.4	-0.1743143	152.4	-0.140732	152.4	-0.179862	152.4	-0.1415547	152.4	-0.1342224	152.4	-0.1490089
152.6	0.9077002	152.6	0.8683376	152.6	0.91141	152.6	0.9282644	152.6	0.8705527	152.6	0.9423448	152.6	0.9668345	152.6	-0.1849979	152.6	-0.1623805	152.6	-0.2178544	152.6	-0.1680363	152.6	-0.1439619	152.6	-0.1787091	152.6	-0.14197	152.6	-0.1408505	152.6	-0.1483389
152.8	0.9073434	152.8	0.8647332	152.8	0.9139606	152.8	0.9300394	152.8	0.8717	152.8	0.9418287	152.8	0.9661769	152.8	-0.1854666	152.8	-0.1580334	152.8	-0.2226857	152.8	-0.1689953	152.8	-0.1409606	152.8	-0.1811306	152.8	-0.143488	152.8	-0.1329921	152.8	-0.1552433
153	0.9128577	153	0.873037	153	0.912515	153	0.9271032	153	0.8729119	153	0.9475219	153	0.9622976	153	-0.1854485	153	-0.1562772	153	-0.2217028	153	-0.1667067	153	-0.137812	153	-0.17738	153	-0.1413116	153	-0.1412288	153	-0.1478079
153.2	0.9112055	153.2	0.8706222	153.2	0.9138746	153.2	0.9349628	153.2	0.8785402	153.2	0.9458421	153.2	0.9679366	153.2	-0.1836091	153.2	-0.1567978	153.2	-0.21825	153.2	-0.1704458	153.2	-0.1443681	153.2	-0.1783644	153.2	-0.1383386	153.2	-0.1367331	153.2	-0.1489244
153.4	0.9131409	153.4	0.8769597	153.4	0.9114132	153.4	0.9298039	153.4	0.8797621	153.4	0.9497911	153.4	0.9650766	153.4	-0.1848998	153.4	-0.1579076	153.4	-0.2142435	153.4	-0.1706534	153.4	-0.1419394	153.4	-0.1828742	153.4	-0.1446712	153.4	-0.1383277	153.4	-0.1533103
153.6	0.9182689	153.6	0.8741499	153.6	0.9129179	153.6	0.9347299	153.6	0.8774241	153.6	0.9474953	153.6	0.9733774	153.6	-0.1814618	153.6	-0.1614485	153.6	-0.2210995	153.6	-0.1646143	153.6	-0.1400073	153.6	-0.1813877	153.6	-0.1370571	153.6	-0.1319268	153.6	-0.1508248
153.8	0.914248	153.8	0.8725345	153.8	0.9194847	153.8	0.9331484	153.8	0.8772759	153.8	0.9480987	153.8	0.9755703	153.8	-0.1835623	153.8	-0.1599752	153.8	-0.2189474	153.8	-0.168116	153.8	-0.1457632	153.8	-0.1763507	153.8	-0.1387994	153.8	-0.1378443	153.8	-0.1493161
154	0.9179317	154	0.8760856	154	0.9255879	154	0.9326308	154	0.8787639	154	0.9517152	154	0.9704948	154	-0.1791792	154	-0.1619444	154	-0.2157651	154	-0.1704073	154	-0.1435704	154	-0.1730331	154	-0.1373222	154	-0.1384262	154	-0.1510707
154.2	0.9166716	154.2	0.8783921	154.2	0.9195685	154.2	0.9369774	154.2	0.883629	154.2	0.9583359	154.2	0.9785417	154.2	-0.1847054	154.2	-0.1563803	154.2	-0.2203988	154.2	-0.1664159	154.2	-0.1350517	154.2	-0.1759574	154.2	-0.1371408	154.2	-0.1311763	154.2	-0.1488613
154.4	0.9166446	154.4	0.8821611	154.4	0.9201791	154.4	0.9374087	154.4	0.8819362	154.4	0.9545019	154.4	0.9772811	154.4	-0.1813936	154.4	-0.1609077	154.4	-0.2108294	154.4	-0.1666505	154.4	-0.1341712	154.4	-0.1748465	154.4	-0.1443215	154.4	-0.1337578	154.4	-0.1460153
154.6	0.9221796	154.6	0.8870107	154.6	0.9233173	154.6	0.937717	154.6	0.88644	154.6	0.954005	154.6	0.9762505	154.6	-0.1792304	154.6	-0.1571983	154.6	-0.2194467	154.6	-0.1673573	154.6	-0.1377093	154.6	-0.1766233	154.6	-0.1364071	154.6	-0.1333427	154.6	-0.1474977
154.8	0.9234591	154.8	0.8832504	154.8	0.9284889	154.8	0.9378256	154.8	0.8882998	154.8	0.9614512	154.8	0.9809119	154.8	-0.1783581	154.8	-0.1594065	154.8	-0.2167549	154.8	-0.1670227	154.8	-0.1428321	154.8	-0.1695567	154.8	-0.1393379	154.8	-0.1334721	154.8	-0.1466806
155	0.9223481	155	0.8840166	155	0.9264553	155	0.9392875	155	0.8876519	155	0.9538925	155	0.9793951	155	-0.182638	155	-0.1540835	155	-0.2185115	155	-0.1675971	155	-0.1379543	155	-0.1777903	155	-0.1383594	155	-0.1313235	155	-0.1490576
155.2	0.9247632	155.2	0.8814252	155.2	0.9264467	155.2	0.9420233	155.2	0.8893703	155.2	0.9610153	155.2	0.9834785	155.2	-0.1820373	155.2	-0.1603442	155.2	-0.2148005	155.2	-0.1679496	155.2	-0.1433235	155.2	-0.1750145	155.2	-0.1407653	155.2	-0.1322272	155.2	-0.149052
155.4	0.9208382	155.4	0.8871104	155.4	0.9313511	155.4	0.943663	155.4	0.8894063	155.4	0.961837	155.4	0.9829233	155.4	-0.1828774	155.4	-0.1589639	155.4	-0.2206321	155.4	-0.1690428	155.4	-0.1396766	155.4	-0.176773	155.4	-0.1361708	155.4	-0.1272169	155.4	-0.1479434
155.6	0.9236354	155.6	0.8861899	155.6	0.9276277	155.6	0.941063	155.6	0.8926867	155.6	0.9639794	155.6	0.9843205	155.6	-0.182974	155.6	-0.1571485	155.6	-0.2146159	155.6	-0.1688161	155.6	-0.1414849	155.6	-0.1762453	155.6	-0.1421949	155.6	-0.1344555	155.6	-0.1432625
155.8	0.9296142	155.8	0.8842404	155.8	0.9276777	155.8	0.945254	155.8	0.8923364	155.8	0.9622513	155.8	0.9860222	155.8	-0.1834864	155.8	-0.1575114	155.8	-0.2111119	155.8	-0.1700978	155.8	-0.1405554	155.8	-0.1738804	155.8	-0.1387828	155.8	-0.1308566	155.8	-0.1490028
156	0.9287305	156	0.8883442	156	0.9311644	156	0.950716	156	0.887077	156	0.9670525	156	0.9868863	156	-0.1821131	156	-0.1567676	156	-0.2187458	156	-0.1656973	156	-0.1363902	156	-0.1768859	156	-0.1344546	156	-0.1343985	156	-0.147092
156.2	0.928669	156.2	0.8913091	156.2	0.9316432	156.2	0.9463423	156.2	0.8938939	156.2	0.9664044	156.2	0.9868584	156.2	-0.1815836	156.2	-0.1574459	156.2	-0.2137908	156.2	-0.1702145	156.2	-0.1410972	156.2	-0.1741976	156.2	-0.1335098	156.2	-0.1278008	156.2	-0.1453909
156.4	0.9279108	156.4	0.8931344	156.4	0.932436	156.4	0.9474574	156.4	0.8963274	156.4	0.9672532	156.4	0.9839147	156.4	-0.181851	156.4	-0.1524759	156.4	-0.2139515	156.4	-0.1644157	156.4	-0.1400587	156.4	-0.1740636	156.4	-0.1351365	156.4	-0.1328899	156.4	-0.1479482
156.6	0.9294937	156.6	0.8915628	156.6	0.9350512	156.6	0.9471666	156.6	0.890224	156.6	0.9664442	156.6	0.986217	156.6	-0.1781442	156.6	-0.154803	156.6	-0.217018	156.6	-0.1663562	156.6	-0.1400049	156.6	-0.1752241	156.6	-0.1382219	156.6	-0.1276113	156.6	-0.1417937
156.8	0.9341168	156.8	0.8895785	156.8	0.9358715	156.8	0.9498784	156.8	0.8947635	156.8	0.9687549	156.8	0.9935324	156.8	-0.1811673	156.8	-0.1589203	156.8	-0.2120646	156.8	-0.1668979	156.8	-0.1400791	156.8	-0.1742999	156.8	-0.1383424	156.8	-0.1331948	156.8	-0.1506146
157	0.9345914	157	0.8927739	157	0.9399568	157	0.9520266	157	0.8940278	157	0.9687851	157	0.9900981	157	-0.1806423	157	-0.159004	157	-0.2132953	157	-0.1620753	157	-0.1339676	157	-0.1753559	157	-0.1383817	157	-0.1329194	157	-0.146532
157.2	0.9410874	157.2	0.8968166	157.2	0.9373471	157.2	0.9496437	157.2	0.8969967	157.2	0.9742782	157.2	0.9947411	157.2	-0.1773432	157.2	-0.1549068	157.2	-0.2150717	157.2	-0.1655321	157.2	-0.1381142	157.2	-0.1784529	157.2	-0.1346623	157.2	-0.1330597	157.2	-0.1470893
157.4	0.9375251	157.4	0.8988588	157.4	0.9386412	157.4	0.956511	157.4	0.8959308	157.4	0.9741949	157.4	0.9952865	157.4	-0.1812857	157.4	-0.1551477	157.4	-0.2138927	157.4	-0.1616636	157.4	-0.1365526	157.4	-0.1732919	157.4	-0.1332259	157.4	-0.1330483	157.4	-0.1465419
157.6	0.9398696	157.6	0.8964358	157.6	0.9444047	157.6	0.9569532	157.6	0.8979113	157.6	0.9746639	157.6	0.9986696	157.6	-0.1833151	157.6	-0.1576736	157.6	-0.2104744	157.6	-0.1674704	157.6	-0.1391136	157.6	-0.1758835	157.6	-0.1390472	157.6	-0.1340622	157.6	-0.1444355
157.8	0.9380373	157.8	0.8974152	157.8	0.9428972	157.8	0.9553766	157.8	0.8975259	157.8	0.9756826	157.8	0.997189	157.8	-0.177402	157.8	-0.1545766	157.8	-0.2174839	157.8	-0.1617767	157.8	-0.1364556	157.8	-0.1700716	157.8	-0.137917	157.8	-0.1297303	157.8	-0.1501422
158	0.9406649	158	0.9010573	158	0.9422608	158	0.9558888	158	0.9026132	158	0.9773708	158	0.9969221	158	-0.1776577	158	-0.1565943	158	-0.2132612	158	-0.1625933	158	-0.1360929	158	-0.171693	158	-0.1415507	158	-0.1296505	158	-0.1472374
158.2	0.9404651	158.2	0.9077657	158.2	0.9413484	158.2	0.9531827	158.2	0.9051146	158.2	0.976234	158.2	0.9988925	158.2	-0.1824151	158.2	-0.1570985	158.2	-0.2121058	158.2	-0.1615188	158.2	-0.1326519	158.2	-0.1744868	158.2	-0.1343714	158.2	-0.1305075	158.2	-0.1432376
158.4	0.9436585	158.4	0.9073892	158.4	0.9439201	158.4	0.9613314	158.4	0.9045649	158.4	0.979656	158.4	0.9979183	158.4	-0.176106	158.4	-0.1556648	158.4	-0.2119812	158.4	-0.1614231	158.4	-0.1336949	158.4	-0.1758786	158.4	-0.1361334	158.4	-0.1257454	158.4	-0.1465805
158.6	0.9463499	158.6	0.9059904	158.6	0.9546781	158.6	0.9579703	158.6	0.9110933	158.6	0.9831214	158.6	1.002012	158.6	-0.1803636	158.6	-0.1503082	158.6	-0.216282	158.6	-0.1667562	158.6	-0.1352668	158.6	-0.1727815	158.6	-0.1378776	158.6	-0.1307166	158.6	-0.1448661
158.8	0.9462752	158.8	0.9105443	158.8	0.9495403	158.8	0.9602849	158.8	0.9066538	158.8	0.9813688	158.8	1.002742	158.8	-0.1760485	158.8	-0.1531929	158.8	-0.2156949	158.8	-0.1609789	158.8	-0.1322642	158.8	-0.1699868	158.8	-0.1366683	158.8	-0.1312975	158.8	-0.1424964
159	0.9433032	159	0.9068461	159	0.9478575	159	0.9634905	159	0.9086798	159	0.9829996	159	1.005655	159	-0.1761903	159	-0.1494887	159	-0.2134734	159	-0.1627806	159	-0.1360636	159	-0.1670859	159	-0.1346274	159	-0.1342415	159	-0.1468138
159.2	0.9447792	159.2	0.9076728	159.2	0.9493926	159.2	0.9694095	159.2	0.9110604	159.2	0.9822904	159.2	1.00242	159.2	-0.1778322	159.2	-0.1513186	159.2	-0.2121816	159.2	-0.1593708	159.2	-0.1357706	159.2	-0.1669744	159.2	-0.1338106	159.2	-0.1274485	159.2	-0.1403851
159.4	0.9512004	159.4	0.9070289	159.4	0.9521506	159.4	0.9635341	159.4	0.9072974	159.4	0.9811196	159.4	1.005929	159.4	-0.1784929	159.4	-0.1546424	159.4	-0.2132357	159.4	-0.1615921	159.4	-0.132127	159.4	-0.1727363	159.4	-0.1318981	159.4	-0.1294242	159.4	-0.1420365
159.6	0.9517441	159.6	0.9090778	159.6	0.9537092	159.6	0.963989	159.6	0.912429	159.6	0.9873765	159.6	1.01077	159.6	-0.1781308	159.6	-0.1558052	159.6	-0.210228	159.6	-0.159946	159.6	-0.1348805	159.6	-0.1753532	159.6	-0.1325558	159.6	-0.1263451	159.6	-0.1425424
159.8	0.9489548	159.8	0.908823	159.8	0.9513595	159.8	0.9607806	159.8	0.9147076	159.8	0.9820026	159.8	1.007993	159.8	-0.1778064	159.8	-0.1532013	159.8	-0.2105726	159.8	-0.1664242	159.8	-0.1269086	159.8	-0.1711055	159.8	-0.136261	159.8	-0.1289995	159.8	-0.1403478
160	0.9488827	160	0.9129729	160	0.9563162	160	0.9704247	160	0.9174805	160	0.9852375	160	1.010688	160	-0.1743045	160	-0.1546219	160	-0.2079831	160	-0.166004	160	-0.1377727	160	-0.1681892	160	-0.1366072	160	-0.1302279	160	-0.1435782
160.2	0.9564719	160.2	0.9046298	160.2	0.956647	160.2	0.9725645	160.2	0.9169868	160.2	0.990002	160.2	1.010549	160.2	-0.1759656	160.2	-0.1528635	160.2	-0.207266	160.2	-0.1651265	160.2	-0.1330197	160.2	-0.166882	160.2	-0.1374171	160.2	-0.1257453	160.2	-0.1418257
160.4	0.9518843	160.4	0.9142653	160.4	0.9591411	160.4	0.9652768	160.4	0.9174576	160.4	0.9930701	160.4	1.00722	160.4	-0.1779549	160.4	-0.1561542	160.4	-0.2133717	160.4	-0.1618597	160.4	-0.1328956	160.4	-0.1676086	160.4	-0.1335975	160.4	-0.1288367	160.4	-0.1435891
160.6	0.9546053	160.6	0.9166147	160.6	0.9578102	160.6	0.9727706	160.6	0.9118636	160.6	0.9951718	160.6	1.009911	160.6	-0.1769073	160.6	-0.1526182	160.6	-0.2130101	160.6	-0.1639257	160.6	-0.1307992	160.6	-0.1697653	160.6	-0.1370176	160.6	-0.130644	160.6	-0.1427944
160.8	0.9562747	160.8	0.9166552	160.8	0.9657302	160.8	0.9682232	160.8	0.9140908	160.8	0.9873515	160.8	1.012392	160.8	-0.1779733	160.8	-0.1475272	160.8	-0.2112365	160.8	-0.1595875	160.8	-0.131513	160.8	-0.1673903	160.8	-0.1353526	160.8	-0.1287703	160.8	-0.1414365
161	0.9571145	161	0.9192266	161	0.9585175	161	0.9737355	161	0.9152805	161	0.9958295	161	1.018149	161	-0.1807318	161	-0.1489019	161	-0.2089196	161	-0.161981	161	-0.138577	161	-0.1724481	161	-0.1300271	161	-0.124354	161	-0.1461166
161.2	0.9558823	161.2	0.9206553	161.2	0.9648851	161.2	0.974907	161.2	0.9193455	161.2	0.9955652	161.2	1.016937	161.2	-0.1739488	161.22	-0.1525188	161.22	-0.2088119	161.22	-0.159453	161.22	-0.1323546	161.22	-0.1667668	161.22	-0.1301533	161.22	-0.1266509	161.22	-0.1477555
161.4	0.9584652	161.4	0.9192159	161.4	0.959045	161.4	0.9744914	161.4	0.9198345	161.4	0.994839	161.4	1.014439	161.4	-0.1821546	161.4	-0.1517344	161.4	-0.2115351	161.4	-0.1559807	161.4	-0.1310742	161.4	-0.1671402	161.4	-0.1357774	161.4	-0.1255268	161.4	-0.1458666
161.6	0.9592399	161.6	0.9216175	161.6	0.9673781	161.6	0.9730643	161.6	0.9234119	161.6	0.9970485	161.6	1.019525	161.6	-0.1749578	161.6	-0.149985	161.6	-0.2118965	161.6	-0.1573131	161.6	-0.1310555	161.6	-0.1664348	161.6	-0.1324535	161.6	-0.1250986	161.6	-0.1450049
161.8	0.9559354	161.8	0.9173436	161.8	0.9624216	161.8	0.9780411	161.8	0.9281117	161.8	0.9936503	161.8	1.019994	161.8	-0.1786772	161.8	-0.1517942	161.8	-0.2121456	161.8	-0.1612581	161.8	-0.1311283	161.8	-0.1662718	161.8	-0.1310096	161.8	-0.1291153	161.8	-0.1459548
162	0.9657508	162	0.9259197	162	0.9688657	162	0.9767367	162	0.9224184	162	0.9980625	162	1.018346	162	-0.1752042	162	-0.1544227	162	-0.2134845	162	-0.1617574	162	-0.1329054	162	-0.1703449	162	-0.1323843	162	-0.1294077	162	-0.140902
162.2	0.9614469	162.2	0.921989	162.2	0.9630679	162.2	0.9758025	162.2	0.926767	162.2	0.9948512	162.2	1.022072	162.2	-0.1772921	162.2	-0.1529991	162.2	-0.210463	162.2	-0.1620194	162.2	-0.133356	162.2	-0.1698447	162.2	-0.1360497	162.2	-0.1243944	162.2	-0.1457891
162.41	0.9696664	162.41	0.9266158	162.41	0.9680504	162.41	0.9811615	162.41	0.9254667	162.41	1.001456	162.41	1.022608	162.41	-0.1735318	162.4	-0.1513583	162.4	-0.2077776	162.4	-0.1600179	162.4	-0.1293322	162.4	-0.1641235	162.4	-0.1303187	162.4	-0.1279478	162.4	-0.1387509
162.6	0.964061	162.6	0.9222653	162.6	0.9709136	162.6	0.9798958	162.6	0.9256662	162.6	1.00513	162.6	1.024097	162.6	-0.1791128	162.6	-0.1506604	162.6	-0.207723	162.6	-0.1581282	162.6	-0.1335042	162.6	-0.1683392	162.6	-0.1304563	162.6	-0.1230871	162.6	-0.1411006
162.8	0.9664453	162.8	0.9302642	162.8	0.9663492	162.8	0.9785701	162.8	0.9295198	162.8	1.003043	162.8	1.021736	162.8	-0.1775229	162.8	-0.1488817	162.8	-0.2071435	162.8	-0.159105	162.8	-0.1355036	162.8	-0.168891	162.8	-0.1320193	162.8	-0.1229628	162.8	-0.1457364
163	0.966059	163	0.9273737	163	0.9721244	163	0.9855087	163	0.9330823	163	1.002373	163	1.024794	163	-0.1738994	163	-0.1533481	163	-0.2070399	163	-0.160054	163	-0.1350799	163	-0.1694854	163	-0.1285392	163	-0.1247994	163	-0.1395382
163.2	0.9648848	163.2	0.9321246	163.2	0.9770392	163.2	0.9824513	163.2	0.9267428	163.2	1.005989	163.2	1.026053	163.2	-0.179274	163.2	-0.1484707	163.2	-0.2090736	163.2	-0.1604224	163.2	-0.1337582	163.2	-0.1662759	163.2	-0.1293459	163.2	-0.1218097	163.2	-0.1398107
163.4	0.9677638	163.4	0.9286166	163.4	0.9722854	163.4	0.9787232	163.4	0.9289855	163.4	1.002633	163.4	1.022802	163.4	-0.1745894	163.4	-0.1482567	163.4	-0.2149734	163.4	-0.1552515	163.4	-0.1360828	163.4	-0.1703919	163.4	-0.1317138	163.4	-0.1255154	163.4	-0.1424689
163.6	0.9695897	163.6	0.9276626	163.6	0.9745091	163.6	0.9831041	163.6	0.9333296	163.6	1.005515	163.6	1.024196	163.6	-0.1743348	163.6	-0.148071	163.6	-0.2111921	163.6	-0.1563837	163.6	-0.1283282	163.6	-0.1687659	163.6	-0.1329628	163.6	-0.1299243	163.6	-0.1382279
163.8	0.9721293	163.8	0.9314301	163.8	0.97602	163.8	0.9892468	163.8	0.9295707	163.8	1.009064	163.8	1.028649	163.8	-0.1762027	163.8	-0.1503077	163.8	-0.2107553	163.8	-0.1547567	163.8	-0.1313414	163.8	-0.1678507	163.8	-0.1283131	163.8	-0.1233068	163.8	-0.1405781
164	0.9698383	164	0.9315444	164	0.9781573	164	0.9887452	164	0.9325199	164	1.008675	164	1.031753	164	-0.1778866	164	-0.1478552	164	-0.2051806	164	-0.1565796	164	-0.131712	164	-0.164692	164	-0.127204	164	-0.126797	164	-0.136925
164.2	0.97066	164.2	0.933374	164.2	0.9783602	164.2	0.9900216	164.2	0.9347004	164.2	1.009308	164.2	1.026796	164.2	-0.1721948	164.2	-0.1474531	164.2	-0.2107263	164.2	-0.1621346	164.2	-0.1275028	164.2	-0.163508	164.2	-0.127868	164.2	-0.1209115	164.2	-0.1443678
164.4	0.976461	164.4	0.9296975	164.4	0.9822307	164.4	0.9947217	164.4	0.9356841	164.4	1.009257	164.4	1.035936	164.4	-0.175847	164.4	-0.1500678	164.4	-0.2043908	164.4	-0.1590027	164.4	-0.1326152	164.4	-0.1659054	164.4	-0.1297109	164.4	-0.1265642	164.4	-0.1390818
164.6	0.9770671	164.6	0.934565	164.6	0.980641	164.6	0.9924616	164.6	0.9370006	164.6	1.016433	164.6	1.033748	164.6	-0.178132	164.6	-0.1460879	164.6	-0.2020515	164.6	-0.1596971	164.6	-0.1259293	164.6	-0.1639299	164.6	-0.1275921	164.6	-0.1254907	164.6	-0.1401765
164.8	0.9800593	164.8	0.9391616	164.8	0.9795045	164.8	0.9906405	164.8	0.9380267	164.8	1.011735	164.8	1.032635	164.8	-0.1700541	164.8	-0.1477029	164.8	-0.2064132	164.8	-0.1562899	164.8	-0.1295841	164.8	-0.1689525	164.8	-0.1284289	164.8	-0.1265877	164.8	-0.1341112
165	0.978677	165	0.9370102	165	0.980651	165	0.9929162	165	0.9356899	165	1.014436	165	1.036035	165	-0.170903	165	-0.1534764	165	-0.205289	165	-0.1592059	165	-0.1311145	165	-0.1669033	165	-0.1249548	165	-0.1242967	165	-0.1370278
165.2	0.9783209	165.2	0.9408045	165.2	0.9814354	165.2	0.9943811	165.2	0.9365647	165.2	1.011682	165.2	1.037542	165.2	-0.1718797	165.2	-0.1446502	165.2	-0.2062446	165.2	-0.1523461	165.2	-0.134039	165.2	-0.1679571	165.2	-0.1266147	165.2	-0.1208535	165.2	-0.1344635
165.4	0.9829393	165.4	0.9407441	165.4	0.9865612	165.4	0.9943351	165.4	0.9426829	165.4	1.016459	165.4	1.040804	165.4	-0.1730877	165.4	-0.14588	165.4	-0.20684	165.4	-0.1585013	165.4	-0.1311157	165.4	-0.1634885	165.4	-0.1279871	165.4	-0.1209652	165.4	-0.1355403
165.6	0.9769422	165.6	0.9376848	165.6	0.9859225	165.6	0.9968206	165.6	0.941009	165.6	1.014385	165.6	1.040341	165.6	-0.1737126	165.6	-0.1453823	165.6	-0.2061352	165.6	-0.1599911	165.6	-0.131978	165.6	-0.160188	165.6	-0.1296328	165.6	-0.1211001	165.6	-0.135258
165.8	0.9809923	165.8	0.9462543	165.8	0.9847788	165.8	0.9967772	165.8	0.9436862	165.8	1.017335	165.8	1.037205	165.8	-0.172185	165.8	-0.1409506	165.8	-0.2029097	165.8	-0.152081	165.8	-0.1319474	165.8	-0.1603338	165.8	-0.1256212	165.8	-0.125164	165.8	-0.1379646
166	0.9788477	166	0.9428822	166	0.9882004	166	0.9993761	166	0.9416876	166	1.018215	166	1.041157	166	-0.1729808	166	-0.1453151	166	-0.2036984	166	-0.156751	166	-0.1278236	166	-0.1638471	166	-0.1285249	166	-0.1203915	166	-0.1355041
166.2	0.9836956	166.2	0.9444373	166.2	0.9889045	166.2	0.9983452	166.2	0.9426144	166.2	1.017895	166.2	1.039875	166.2	-0.1721945	166.2	-0.1475008	166.2	-0.2011362	166.2	-0.1545495	166.2	-0.1261328	166.2	-0.1619315	166.2	-0.1301048	166.2	-0.1222361	166.2	-0.140499
166.4	0.9795907	166.4	0.944275	166.4	0.9880235	166.4	1.000972	166.4	0.9504691	166.4	1.019667	166.4	1.040923	166.4	-0.1728258	166.4	-0.1490311	166.4	-0.2055694	166.4	-0.154153	166.4	-0.129447	166.4	-0.166058	166.4	-0.1241026	166.4	-0.121522	166.4	-0.135863
166.6	0.9808537	166.6	0.945511	166.6	0.9855839	166.6	1.003921	166.6	0.9502467	166.6	1.018409	166.6	1.042506	166.6	-0.1752856	166.6	-0.1443329	166.6	-0.206071	166.6	-0.1569451	166.6	-0.1296084	166.6	-0.1622059	166.6	-0.1239947	166.6	-0.123455	166.6	-0.1354056
166.8	0.9873727	166.8	0.9449195	166.8	0.9899036	166.8	0.9969321	166.8	0.945775	166.8	1.020507	166.8	1.042721	166.8	-0.1705298	166.8	-0.1472029	166.8	-0.2019254	166.8	-0.1506102	166.8	-0.1256935	166.8	-0.1633178	166.8	-0.1285241	166.8	-0.1238107	166.8	-0.1371993
167	0.9886307	167	0.9462777	167	0.9901952	167	1.004738	167	0.9459545	167	1.023723	167	1.046002	167	-0.1741917	167	-0.1445954	167	-0.207236	167	-0.1542832	167	-0.1282709	167	-0.164169	167	-0.12965	167	-0.1210157	167	-0.133063
167.2	0.986485	167.2	0.9498054	167.2	0.9900922	167.2	1.002752	167.2	0.9479204	167.2	1.028888	167.2	1.045821	167.2	-0.1774868	167.2	-0.1511095	167.2	-0.2047918	167.2	-0.1565489	167.2	-0.127196	167.2	-0.1618915	167.2	-0.1261874	167.2	-0.121486	167.2	-0.1379936
167.4	0.9809048	167.4	0.9518761	167.4	0.9942883	167.4	1.005487	167.4	0.9528056	167.4	1.024627	167.4	1.047716	167.4	-0.1742212	167.4	-0.1418659	167.4	-0.2041029	167.4	-0.1540548	167.4	-0.1289462	167.4	-0.162684	167.4	-0.1259632	167.4	-0.1220651	167.4	-0.1354249
167.6	0.9887103	167.6	0.9523117	167.6	0.9952844	167.6	1.011428	167.6	0.9514258	167.6	1.025437	167.6	1.048892	167.6	-0.1722952	167.6	-0.146248	167.6	-0.2056407	167.6	-0.1570754	167.6	-0.1295432	167.6	-0.162919	167.6	-0.1269874	167.6	-0.1179652	167.6	-0.137654
167.8	0.9899723	167.8	0.9497188	167.8	0.9918479	167.8	1.010355	167.8	0.9518526	167.8	1.027224	167.8	1.046534	167.8	-0.1709218	167.8	-0.1412611	167.8	-0.2038681	167.8	-0.1533948	167.8	-0.127739	167.8	-0.1644937	167.8	-0.1264278	167.8	-0.1252052	167.8	-0.1357308
168	0.9911067	168	0.9550751	168	0.9980845	168	1.003797	168	0.9524926	168	1.027406	168	1.050898	168	-0.1683696	168	-0.1478084	168	-0.201327	168	-0.1580371	168	-0.1224946	168	-0.1618426	168	-0.1269982	168	-0.1200675	168	-0.1344668
168.2	0.9891924	168.2	0.9557736	168.2	0.996918	168.2	1.005132	168.2	0.9560035	168.2	1.031575	168.2	1.055391	168.2	-0.1719261	168.2	-0.143965	168.2	-0.2064559	168.2	-0.1560102	168.2	-0.1300691	168.2	-0.1617465	168.2	-0.1251991	168.2	-0.1176694	168.2	-0.1334849
168.4	0.9916093	168.4	0.955493	168.4	0.9981378	168.4	1.009484	168.4	0.9571846	168.4	1.024594	168.4	1.049727	168.4	-0.1673189	168.4	-0.1464778	168.4	-0.2061898	168.4	-0.1487624	168.4	-0.126295	168.4	-0.162827	168.4	-0.128839	168.4	-0.1227894	168.4	-0.1349844
168.6	0.9991241	168.6	0.9588786	168.6	1.004641	168.6	1.009177	168.6	0.9570556	168.6	1.029766	168.6	1.052854	168.6	-0.1752927	168.6	-0.145007	168.6	-0.2050517	168.6	-0.1516344	168.6	-0.1213962	168.6	-0.162528	168.6	-0.1289864	168.6	-0.1189578	168.6	-0.1308237
168.8	0.9925346	168.8	0.9561877	168.8	1.002827	168.8	1.015407	168.8	0.9542218	168.8	1.030083	168.8	1.052731	168.8	-0.1713593	168.8	-0.1462496	168.8	-0.2032404	168.8	-0.1538742	168.8	-0.1253605	168.8	-0.1595153	168.8	-0.1251389	168.8	-0.1218369	168.8	-0.1359113
169	0.9988858	169	0.9598522	169	1.001651	169	1.012085	169	0.9600981	169	1.027157	169	1.053023	169	-0.1728359	169	-0.1401985	169	-0.207643	169	-0.1526376	169	-0.1247445	169	-0.1584647	169	-0.1276213	169	-0.1178606	169	-0.1345644
169.2	0.9965031	169.2	0.9600108	169.2	1.007156	169.2	1.015865	169.2	0.9568334	169.2	1.033442	169.2	1.061109	169.2	-0.1705727	169.2	-0.1452231	169.2	-0.2029448	169.2	-0.1528073	169.2	-0.1251771	169.2	-0.1623061	169.2	-0.126861	169.2	-0.1219371	169.2	-0.1398996
169.4	0.9965637	169.4	0.9597702	169.4	1.00307	169.4	1.012468	169.4	0.9543691	169.4	1.035042	169.4	1.058834	169.4	-0.1704705	169.4	-0.1433083	169.4	-0.2048857	169.4	-0.1539661	169.4	-0.1241365	169.4	-0.1636132	169.4	-0.1228409	169.4	-0.1212209	169.4	-0.1346401
169.6	1.000507	169.6	0.9598492	169.6	1.004009	169.6	1.011652	169.6	0.9593956	169.6	1.03458	169.6	1.057999	169.6	-0.1705775	169.6	-0.143904	169.6	-0.206704	169.6	-0.1528242	169.6	-0.1283401	169.6	-0.1617059	169.6	-0.1248619	169.6	-0.1263251	169.6	-0.1364112
169.8	0.9999909	169.8	0.9619408	169.8	1.003783	169.8	1.016217	169.8	0.9615377	169.8	1.037969	169.8	1.060688	169.8	-0.1706632	169.8	-0.1442349	169.8	-0.2036451	169.8	-0.1542657	169.8	-0.1221742	169.8	-0.1650291	169.8	-0.1268194	169.8	-0.1211767	169.8	-0.136299
170	1.042498	170	0.9989267	170	1.041968	170	1.053815	170	1.000058	170	1.076424	170	1.082649	170	-0.1797642	170	-0.1375406	170	-0.2058752	170	-0.1485118	170	-0.1239388	170	-0.161464	170	-0.123593	170	-0.1162653	170	-0.1368335
170.2	1.045767	170.2	1.00177	170.2	1.045801	170.2	1.058853	170.2	0.9991454	170.2	1.071158	170.2	1.094048	170.2	-0.176692	170.2	-0.1415471	170.2	-0.1994559	170.2	-0.1515258	170.2	-0.1258867	170.2	-0.1603654	170.2	-0.1254082	170.2	-0.1161125	170.2	-0.1346468
170.4	1.047832	170.4	1.007252	170.4	1.049239	170.4	1.054152	170.4	1.004575	170.4	1.077514	170.4	1.091147	170.4	-0.1740508	170.4	-0.137052	170.4	-0.200133	170.4	-0.1521307	170.4	-0.1214037	170.4	-0.1564686	170.4	-0.1209814	170.4	-0.1197274	170.4	-0.1383594
170.6	1.046408	170.6	1.004514	170.6	1.051056	170.6	1.063744	170.6	1.002721	170.6	1.075992	170.6	1.092829	170.6	-0.1725231	170.6	-0.1424004	170.6	-0.2012962	170.6	-0.1532941	170.6	-0.1272771	170.6	-0.1620105	170.6	-0.1224326	170.6	-0.1153431	170.6	-0.132027
170.8	1.046091	170.8	1.006083	170.8	1.051448	170.8	1.058233	170.8	1.004839	170.8	1.080151	170.8	1.097273	170.8	-0.1750417	170.8	-0.1401085	170.8	-0.2002094	170.8	-0.1482589	170.8	-0.1242637	170.8	-0.1586441	170.8	-0.1246696	170.8	-0.1138389	170.8	-0.1366179
171	1.049474	171	1.007666	171	1.053192	171	1.057869	171	1.00864	171	1.078223	171	1.094586	171	-0.1717252	171	-0.1449691	171	-0.1992622	171	-0.1513914	171	-0.1232777	171	-0.1574269	171	-0.1225675	171	-0.1178175	171	-0.1270087
171.2	1.046368	171.2	1.007416	171.2	1.053805	171.2	1.064109	171.2	1.007259	171.2	1.081284	171.2	1.095551	171.2	-0.1699991	171.2	-0.1442526	171.2	-0.201202	171.2	-0.1508369	171.2	-0.1241834	171.2	-0.1518668	171.2	-0.1194893	171.2	-0.1188667	171.2	-0.1351282
171.4	1.049947	171.4	1.011841	171.4	1.052666	171.4	1.061515	171.4	1.006459	171.4	1.08311	171.4	1.098595	171.4	-0.1699269	171.4	-0.1424688	171.4	-0.2001023	171.4	-0.1494134	171.4	-0.1166938	171.4	-0.1571059	171.4	-0.127782	171.4	-0.1147716	171.4	-0.1335582
171.6	1.052999	171.6	1.009856	171.6	1.052103	171.6	1.062053	171.6	1.007318	171.6	1.081164	171.6	1.098752	171.6	-0.1725166	171.6	-0.1418606	171.6	-0.1954588	171.6	-0.1502175	171.6	-0.1223431	171.6	-0.156961	171.6	-0.1246109	171.6	-0.119218	171.6	-0.1326047
171.8	1.051374	171.8	1.01102	171.8	1.054756	171.8	1.064546	171.8	1.00165	171.8	1.086515	171.8	1.095866	171.8	-0.1732556	171.8	-0.145287	171.8	-0.1976819	171.8	-0.1521606	171.8	-0.1215873	171.8	-0.1608907	171.8	-0.1230331	171.8	-0.1177603	171.8	-0.1282189
172	1.049408	172	1.012088	172	1.055912	172	1.06711	172	1.010493	172	1.086513	172	1.100961	172	-0.1726083	172	-0.1381477	172	-0.1990438	172	-0.1532732	172	-0.1234264	172	-0.1557768	172	-0.1165265	172	-0.1140038	172	-0.1351175
172.2	1.053312	172.2	1.012867	172.2	1.052983	172.2	1.065621	172.2	1.008688	172.2	1.086216	172.2	1.101992	172.2	-0.1671779	172.2	-0.1386841	172.2	-0.2031209	172.2	-0.1467532	172.2	-0.1207467	172.2	-0.1587086	172.2	-0.1253373	172.2	-0.1161536	172.2	-0.1333354
172.4	1.049338	172.4	1.015544	172.4	1.06013	172.4	1.066084	172.4	1.009172	172.4	1.083413	172.4	1.10227	172.4	-0.1744098	172.4	-0.1350745	172.4	-0.1992155	172.4	-0.1492399	172.4	-0.1246532	172.4	-0.1571963	172.4	-0.1165436	172.4	-0.1150725	172.4	-0.1344034
172.6	1.049111	172.6	1.009229	172.6	1.055028	172.6	1.064637	172.6	1.009305	172.6	1.083851	172.6	1.104029	172.6	-0.170158	172.6	-0.135335	172.6	-0.2016049	172.6	-0.1488934	172.6	-0.1168325	172.6	-0.1610644	172.6	-0.1208108	172.6	-0.1152943	172.6	-0.1334948
172.8	1.054016	172.8	1.014144	172.8	1.056316	172.8	1.067283	172.8	1.014329	172.8	1.084232	172.8	1.103009	172.8	-0.1668257	172.8	-0.1410434	172.8	-0.1957859	172.8	-0.1503834	172.8	-0.1193894	172.8	-0.1558161	172.8	-0.1265005	172.8	-0.1162964	172.8	-0.1274851
173	1.052422	173	1.011895	173	1.055416	173	1.065946	173	1.00881	173	1.083446	173	1.104292	173	-0.166193	173	-0.1347434	173	-0.2019447	173	-0.1485115	173	-0.1234847	173	-0.1562566	173	-0.1193082	173	-0.1134278	173	-0.1323926
173.2	1.047054	173.2	1.010359	173.2	1.052523	173.2	1.062263	173.2	1.009551	173.2	1.086738	173.2	1.105153	173.2	-0.1697984	173.2	-0.1390404	173.2	-0.1972933	173.2	-0.1474739	173.2	-0.1206642	173.2	-0.1566769	173.2	-0.1214911	173.2	-0.1178825	173.2	-0.1308689
173.4	1.049454	173.4	1.015198	173.4	1.06032	173.4	1.066812	173.4	1.011586	173.4	1.086879	173.4	1.10271	173.4	-0.1671446	173.4	-0.1399208	173.4	-0.1955722	173.4	-0.1450016	173.4	-0.1245679	173.4	-0.1539413	173.4	-0.1222383	173.4	-0.1180557	173.4	-0.1356363
173.6	1.052877	173.6	1.014668	173.6	1.063446	173.6	1.07168	173.6	1.007573	173.6	1.085716	173.6	1.102165	173.6	-0.1659434	173.6	-0.1398462	173.6	-0.199583	173.6	-0.1502505	173.6	-0.1258309	173.6	-0.1543203	173.6	-0.1195812	173.6	-0.1081629	173.6	-0.1318714
173.8	1.04928	173.8	1.016743	173.8	1.056718	173.8	1.070089	173.8	1.010513	173.8	1.087202	173.8	1.099897	173.8	-0.1701514	173.8	-0.1375287	173.8	-0.1990782	173.8	-0.1508389	173.8	-0.1239294	173.8	-0.1615741	173.8	-0.1202879	173.8	-0.1109101	173.8	-0.1345077
174	1.060053	174	1.015825	174	1.056979	174	1.070674	174	1.015765	174	1.082135	174	1.103264	174	-0.1666209	174	-0.1342417	174	-0.1946419	174	-0.1500154	174	-0.1223622	174	-0.1566845	174	-0.1184996	174	-0.1154985	174	-0.1331538
174.2	1.05012	174.2	1.016057	174.2	1.057844	174.2	1.064474	174.2	1.010871	174.2	1.088948	174.2	1.103164	174.2	-0.169452	174.2	-0.133812	174.2	-0.1986052	174.2	-0.1491675	174.2	-0.116632	174.2	-0.1564393	174.2	-0.1200745	174.2	-0.1200882	174.2	-0.1333251
174.4	1.053528	174.4	1.016589	174.4	1.060297	174.4	1.070162	174.4	1.014142	174.4	1.086466	174.4	1.104792	174.4	-0.1679823	174.4	-0.1389239	174.4	-0.1971541	174.4	-0.1499779	174.4	-0.1192286	174.4	-0.1534306	174.4	-0.1225732	174.4	-0.1138566	174.4	-0.1371756
174.6	1.057026	174.6	1.021211	174.6	1.061637	174.6	1.070451	174.6	1.013682	174.6	1.090388	174.6	1.102036	174.6	-0.1685822	174.6	-0.1406742	174.6	-0.1970506	174.6	-0.1480401	174.6	-0.1204674	174.6	-0.1539376	174.6	-0.1195141	174.6	-0.1162463	174.6	-0.1295015
174.8	1.051828	174.8	1.014319	174.8	1.059136	174.8	1.066587	174.8	1.009708	174.8	1.087747	174.8	1.104093	174.8	-0.1656416	174.8	-0.1359446	174.8	-0.196616	174.8	-0.1474639	174.8	-0.1174019	174.8	-0.1560498	174.8	-0.1186447	174.8	-0.1130272	174.8	-0.1284321
175	1.057486	175	1.016146	175	1.06302	175	1.069424	175	1.010568	175	1.086312	175	1.105957	175	-0.1675389	175	-0.1368313	175	-0.1995775	175	-0.1460886	175	-0.1160505	175	-0.1556461	175	-0.1180426	175	-0.1146031	175	-0.1290912
175.2	1.055801	175.2	1.011854	175.2	1.063543	175.2	1.064978	175.2	1.010719	175.2	1.088516	175.2	1.10581	175.2	-0.1684753	175.2	-0.1374602	175.2	-0.1911001	175.2	-0.1483481	175.2	-0.1196603	175.2	-0.1562741	175.2	-0.1190773	175.2	-0.1159827	175.2	-0.1300968
175.4	1.05338	175.4	1.018499	175.4	1.056819	175.4	1.072238	175.4	1.013237	175.4	1.092702	175.4	1.10263	175.4	-0.169057	175.4	-0.1386671	175.4	-0.1952133	175.4	-0.1493801	175.4	-0.1192554	175.4	-0.1556505	175.4	-0.1226751	175.4	-0.1136416	175.4	-0.1320865
175.6	1.06033	175.6	1.013476	175.6	1.059749	175.6	1.066829	175.6	1.013267	175.6	1.084888	175.6	1.102178	175.6	-0.1660182	175.6	-0.1329362	175.6	-0.1969773	175.6	-0.1452647	175.6	-0.1180479	175.6	-0.1513084	175.6	-0.1212594	175.6	-0.113247	175.6	-0.1325846
175.8	1.054282	175.8	1.014527	175.8	1.059592	175.8	1.068712	175.8	1.011309	175.8	1.088793	175.8	1.103825	175.8	-0.1668856	175.8	-0.1377195	175.8	-0.1946071	175.8	-0.1463471	175.8	-0.1158678	175.8	-0.1549391	175.8	-0.1196255	175.8	-0.1127817	175.8	-0.1287327
176	1.055771	176	1.019073	176	1.059592	176	1.073721	176	1.010294	176	1.086274	176	1.104091	176	-0.1690927	176	-0.1407653	176	-0.1930896	176	-0.1452255	176	-0.1183552	176	-0.1550767	176	-0.1169693	176	-0.1129873	176	-0.1341932
176.2	1.053078	176.2	1.016432	176.2	1.060849	176.2	1.068285	176.2	1.013462	176.2	1.088989	176.2	1.102438	176.2	-0.170109	176.2	-0.1367779	176.2	-0.1980109	176.2	-0.145133	176.2	-0.1148573	176.2	-0.151182	176.2	-0.1199659	176.2	-0.1152693	176.2	-0.1318407
176.4	1.05243	176.4	1.018866	176.4	1.065071	176.4	1.071897	176.4	1.012301	176.4	1.088645	176.4	1.110237	176.4	-0.1689489	176.4	-0.1372928	176.4	-0.194362	176.4	-0.1484446	176.4	-0.1148284	176.4	-0.1535307	176.4	-0.1175023	176.4	-0.1181876	176.4	-0.1331674
176.6	1.056169	176.6	1.015411	176.6	1.066984	176.6	1.069617	176.6	1.010914	176.6	1.088651	176.6	1.110843	176.6	-0.1654717	176.6	-0.1387061	176.6	-0.1910752	176.6	-0.1464049	176.6	-0.1191258	176.6	-0.1541372	176.6	-0.1177554	176.6	-0.1137545	176.6	-0.1302335
176.8	1.059271	176.8	1.015958	176.8	1.060248	176.8	1.070199	176.8	1.014315	176.8	1.092735	176.8	1.103388	176.8	-0.1659891	176.8	-0.1358585	176.8	-0.1955552	176.8	-0.1439828	176.8	-0.1167399	176.8	-0.1548658	176.8	-0.1221919	176.8	-0.1126995	176.8	-0.1279308
177	1.055446	177	1.018374	177	1.065527	177	1.069708	177	1.018511	177	1.092111	177	1.105571	177	-0.1631345	177	-0.1354206	177	-0.1961351	177	-0.1431057	177	-0.1150026	177	-0.1535976	177	-0.1179182	177	-0.1077691	177	-0.1286979
177.2	1.055085	177.2	1.021163	177.2	1.060893	177.2	1.070805	177.2	1.01919	177.2	1.091308	177.2	1.106289	177.2	-0.1639199	177.2	-0.1369811	177.2	-0.191001	177.2	-0.1435246	177.2	-0.1157852	177.2	-0.1523822	177.2	-0.1188527	177.2	-0.1116153	177.2	-0.133625
177.4	1.053455	177.4	1.017691	177.4	1.065388	177.4	1.072561	177.4	1.014036	177.4	1.090878	177.4	1.1047	177.4	-0.1688088	177.4	-0.133197	177.4	-0.1887612	177.4	-0.1444162	177.4	-0.1172356	177.4	-0.1564204	177.4	-0.1161848	177.4	-0.1125818	177.4	-0.125493
177.6	1.059992	177.6	1.019012	177.6	1.06199	177.6	1.069569	177.6	1.009768	177.6	1.08915	177.6	1.105935	177.6	-0.163419	177.6	-0.1341324	177.6	-0.1924484	177.6	-0.1467544	177.6	-0.1151374	177.6	-0.1504645	177.6	-0.1228318	177.6	-0.112127	177.6	-0.1239568
177.8	1.058318	177.8	1.015306	177.8	1.062394	177.8	1.075363	177.8	1.010803	177.8	1.091607	177.8	1.11213	177.8	-0.1657602	177.8	-0.1376574	177.8	-0.1913199	177.8	-0.1431293	177.8	-0.1172007	177.8	-0.1521507	177.8	-0.1173922	177.8	-0.1130454	177.8	-0.1276713
178	1.052694	178	1.016492	178	1.061533	178	1.07316	178	1.018892	178	1.089156	178	1.112499	178	-0.1689857	178	-0.1356973	178	-0.1937318	178	-0.1449089	178	-0.117857	178	-0.1483196	178	-0.1180012	178	-0.1109225	178	-0.128789
178.2	1.059769	178.2	1.014526	178.2	1.059957	178.2	1.068113	178.2	1.013099	178.2	1.0903	178.2	1.110533	178.2	-0.1633677	178.2	-0.1366652	178.2	-0.1930844	178.2	-0.1418673	178.2	-0.1200904	178.2	-0.1473969	178.2	-0.1186397	178.2	-0.1083728	178.2	-0.1277851
178.4	1.06084	178.4	1.018037	178.4	1.064026	178.4	1.074049	178.4	1.017354	178.4	1.092745	178.4	1.106974	178.4	-0.1682436	178.4	-0.1385304	178.4	-0.1944171	178.4	-0.1437806	178.4	-0.1176046	178.4	-0.1510494	178.4	-0.1212558	178.4	-0.1077474	178.4	-0.132659
178.6	1.058467	178.6	1.020076	178.6	1.062435	178.6	1.073915	178.6	1.016192	178.6	1.090653	178.6	1.107064	178.6	-0.1631178	178.6	-0.1346394	178.6	-0.1945563	178.6	-0.1460616	178.6	-0.1197966	178.6	-0.1503555	178.6	-0.1179679	178.6	-0.1097072	178.6	-0.1280232
178.8	1.063155	178.8	1.019703	178.8	1.06696	178.8	1.07239	178.8	1.013936	178.8	1.08957	178.8	1.108949	178.8	-0.1673443	178.8	-0.1359586	178.8	-0.1957495	178.8	-0.1408528	178.8	-0.1178006	178.8	-0.1487477	178.8	-0.1153388	178.8	-0.1079613	178.8	-0.1285636
179	1.06027	179	1.01956	179	1.0626	179	1.072092	179	1.016427	179	1.087492	179	1.107129	179	-0.1658601	179	-0.1383317	179	-0.1910861	179	-0.1459676	179	-0.1152915	179	-0.1511795	179	-0.1180283	179	-0.1130848	179	-0.1328406
179.2	1.057253	179.2	1.01791	179.2	1.062577	179.2	1.072113	179.2	1.01748	179.2	1.093613	179.2	1.106201	179.2	-0.1660715	179.2	-0.134531	179.2	-0.1942624	179.2	-0.1425536	179.2	-0.1184734	179.2	-0.1527027	179.2	-0.1174378	179.2	-0.1110402	179.2	-0.1295108
179.4	1.055873	179.4	1.017906	179.4	1.063223	179.4	1.073105	179.4	1.018927	179.4	1.094893	179.4	1.109483	179.4	-0.1621726	179.4	-0.1351875	179.4	-0.1947588	179.4	-0.1425832	179.4	-0.1139367	179.4	-0.1522688	179.4	-0.1149898	179.4	-0.1076295	179.4	-0.1307976
179.6	1.066149	179.6	1.016932	179.6	1.063493	179.6	1.067034	179.6	1.021214	179.6	1.094077	179.6	1.106534	179.6	-0.1640161	179.6	-0.1320793	179.6	-0.1914674	179.6	-0.1473639	179.6	-0.1114255	179.6	-0.1509994	179.6	-0.1136387	179.6	-0.1137133	179.6	-0.1267955
179.8	1.057427	179.8	1.020267	179.8	1.065316	179.8	1.070944	179.8	1.016262	179.8	1.095757	179.8	1.107286	179.8	-0.1666386	179.8	-0.1335935	179.8	-0.1938414	179.8	-0.1438669	179.8	-0.1141737	179.8	-0.1483295	179.8	-0.1151585	179.8	-0.1088356	179.8	-0.1287194
180	1.056528	180	1.020324	180	1.062091	180	1.07495	180	1.01532	180	1.092097	180	1.106695	180	-0.1635739	180	-0.1322814	180	-0.193197	180	-0.1442744	180	-0.1173866	180	-0.1532828	180	-0.1121305	180	-0.1099041	180	-0.1251061
180.2	1.060604	180.2	1.019647	180.2	1.066649	180.2	1.076056	180.2	1.020233	180.2	1.095418	180.2	1.113818	180.2	-0.1664396	180.2	-0.1388052	180.2	-0.1905433	180.2	-0.1428704	180.2	-0.1132421	180.2	-0.1493267	180.2	-0.1153577	180.2	-0.1112147	180.2	-0.1261463
180.4	1.05912	180.4	1.018818	180.4	1.061716	180.4	1.077173	180.4	1.021068	180.4	1.092371	180.4	1.107377	180.4	-0.1634839	180.41	-0.132236	180.41	-0.1917808	180.41	-0.1368198	180.41	-0.1131533	180.41	-0.1500131	180.41	-0.1105136	180.41	-0.1092826	180.41	-0.1266529
180.6	1.056229	180.6	1.019065	180.6	1.06804	180.6	1.074969	180.6	1.019844	180.6	1.094426	180.6	1.105084	180.6	-0.1644581	180.6	-0.130838	180.6	-0.1914235	180.6	-0.139223	180.6	-0.1149742	180.6	-0.1474759	180.6	-0.1182887	180.6	-0.1080326	180.6	-0.1247711
180.8	1.059561	180.8	1.016411	180.8	1.063961	180.8	1.074189	180.8	1.018872	180.8	1.096794	180.8	1.106193	180.8	-0.1630437	180.8	-0.1372983	180.8	-0.1894254	180.8	-0.1428311	180.8	-0.1149605	180.8	-0.1489118	180.8	-0.1139278	180.8	-0.1080682	180.8	-0.1264332
181	1.056829	181	1.014928	181	1.062541	181	1.073126	181	1.015103	181	1.093946	181	1.107913	181	-0.1647149	181	-0.1329219	181	-0.1910186	181	-0.1380738	181	-0.112262	181	-0.1544252	181	-0.1187004	181	-0.1101746	181	-0.1263159
181.2	1.059736	181.2	1.018361	181.2	1.064954	181.2	1.069384	181.2	1.017219	181.2	1.090553	181.2	1.105893	181.2	-0.1635384	181.2	-0.1297952	181.2	-0.1939858	181.2	-0.1416717	181.2	-0.1165503	181.2	-0.1494888	181.2	-0.117081	181.2	-0.1074044	181.2	-0.1247547
181.4	1.061116	181.4	1.021026	181.4	1.063302	181.4	1.075061	181.4	1.018883	181.4	1.091986	181.4	1.109536	181.4	-0.1612962	181.4	-0.1337039	181.4	-0.1901028	181.4	-0.1373932	181.4	-0.1097118	181.4	-0.1577094	181.4	-0.1166113	181.4	-0.1093597	181.4	-0.1281066
181.6	1.062698	181.6	1.020034	181.6	1.061218	181.6	1.071187	181.6	1.023296	181.6	1.097187	181.6	1.110489	181.6	-0.1576863	181.6	-0.1302531	181.6	-0.1886473	181.6	-0.1371781	181.6	-0.1160498	181.6	-0.1513609	181.6	-0.1147583	181.6	-0.1086957	181.6	-0.1306594
181.8	1.057812	181.8	1.023229	181.8	1.061442	181.8	1.076972	181.8	1.020059	181.8	1.090091	181.8	1.112627	181.8	-0.1667436	181.8	-0.1350235	181.8	-0.1887662	181.8	-0.1423635	181.8	-0.1140777	181.8	-0.1459023	181.8	-0.113442	181.8	-0.1083895	181.8	-0.1268256
182	1.060061	182	1.021578	182	1.068506	182	1.076875	182	1.021458	182	1.090867	182	1.110831	182	-0.1637119	182	-0.1308598	182	-0.1913809	182	-0.1429727	182	-0.1147474	182	-0.1500681	182	-0.1171694	182	-0.1057675	182	-0.1235316
182.2	1.05429	182.2	1.020139	182.2	1.065964	182.2	1.075712	182.2	1.017718	182.2	1.095683	182.2	1.11129	182.2	-0.1657007	182.2	-0.129231	182.2	-0.1906822	182.2	-0.1422063	182.2	-0.1162582	182.2	-0.1488948	182.2	-0.1126194	182.2	-0.1068983	182.2	-0.1277132
182.4	1.05326	182.4	1.023011	182.4	1.068265	182.4	1.07499	182.4	1.015732	182.4	1.096285	182.4	1.108562	182.4	-0.1617851	182.4	-0.1329394	182.4	-0.18747	182.4	-0.1424024	182.4	-0.1131018	182.4	-0.1432779	182.4	-0.1162003	182.4	-0.1093257	182.4	-0.1237983
182.6	1.060268	182.6	1.020412	182.6	1.069491	182.6	1.072839	182.6	1.016131	182.6	1.095926	182.6	1.108244	182.6	-0.1638758	182.6	-0.1304592	182.6	-0.1869602	182.6	-0.1404418	182.6	-0.1147387	182.6	-0.1484805	182.6	-0.1127788	182.6	-0.1098154	182.6	-0.1281116
182.8	1.059546	182.8	1.019829	182.8	1.062907	182.8	1.072433	182.8	1.017835	182.8	1.09641	182.8	1.112187	182.8	-0.1617103	182.8	-0.1317779	182.8	-0.1908436	182.8	-0.1417399	182.8	-0.1121508	182.8	-0.1500265	182.8	-0.1164287	182.8	-0.1102625	182.8	-0.1260587
183	1.057634	183	1.024513	183	1.066251	183	1.077389	183	1.022249	183	1.096461	183	1.112913	183	-0.1609163	183	-0.1310389	183	-0.1904773	183	-0.1417346	183	-0.1095632	183	-0.1520367	183	-0.1125904	183	-0.1012336	183	-0.1281284
183.2	1.060352	183.2	1.027456	183.2	1.069614	183.2	1.079688	183.2	1.015768	183.2	1.095061	183.2	1.112198	183.2	-0.1617946	183.2	-0.1310777	183.2	-0.1895269	183.2	-0.1407003	183.2	-0.1073034	183.2	-0.1443301	183.2	-0.1140135	183.2	-0.1097191	183.2	-0.1251173
183.4	1.061617	183.4	1.017549	183.4	1.067332	183.4	1.073222	183.4	1.022541	183.4	1.095676	183.4	1.113521	183.4	-0.1634092	183.4	-0.1293489	183.4	-0.1843087	183.4	-0.1416001	183.4	-0.1119109	183.4	-0.1484264	183.4	-0.115431	183.4	-0.1055859	183.4	-0.1254667
183.6	1.065945	183.6	1.020022	183.6	1.070605	183.6	1.07852	183.6	1.014474	183.6	1.096907	183.6	1.113181	183.6	-0.1641491	183.6	-0.1306366	183.6	-0.1915028	183.6	-0.142397	183.6	-0.1104069	183.6	-0.1474152	183.6	-0.1110015	183.6	-0.106144	183.6	-0.1263463
183.8	1.060388	183.8	1.023422	183.8	1.065218	183.8	1.076981	183.8	1.021471	183.8	1.09649	183.8	1.111389	183.8	-0.1621082	183.8	-0.1321289	183.8	-0.1861784	183.8	-0.1369528	183.8	-0.1092541	183.8	-0.1473961	183.8	-0.1141275	183.8	-0.1082954	183.8	-0.1237473
184	1.062134	184	1.020908	184	1.068895	184	1.0765	184	1.020091	184	1.103928	184	1.10751	184	-0.1572465	184	-0.1265769	184	-0.1890139	184	-0.1408919	184	-0.1115751	184	-0.1473582	184	-0.1115754	184	-0.1056453	184	-0.1227427
184.2	1.061817	184.2	1.022185	184.2	1.065615	184.2	1.074118	184.2	1.021383	184.2	1.094912	184.2	1.116454	184.2	-0.1640109	184.2	-0.131166	184.2	-0.1879863	184.2	-0.1364531	184.2	-0.1109216	184.2	-0.1484233	184.2	-0.1128377	184.2	-0.109204	184.2	-0.1248596
184.4	1.066041	184.4	1.024598	184.4	1.070292	184.4	1.07024	184.4	1.014176	184.4	1.094307	184.4	1.111962	184.4	-0.1673795	184.4	-0.1306576	184.4	-0.1853026	184.4	-0.1364845	184.4	-0.1125377	184.4	-0.144773	184.4	-0.1122307	184.4	-0.1067695	184.4	-0.1255599
184.6	1.06278	184.6	1.023209	184.6	1.071511	184.6	1.076855	184.6	1.014874	184.6	1.094915	184.6	1.112334	184.6	-0.1623583	184.6	-0.1282711	184.6	-0.1886344	184.6	-0.1395363	184.6	-0.1119741	184.6	-0.1469026	184.6	-0.1133412	184.6	-0.1046209	184.6	-0.1203286
184.8	1.063585	184.8	1.023775	184.8	1.070268	184.8	1.075241	184.8	1.024077	184.8	1.095808	184.8	1.112264	184.8	-0.1646803	184.8	-0.1304776	184.8	-0.1895391	184.8	-0.1377991	184.8	-0.1108204	184.8	-0.1451176	184.8	-0.1099209	184.8	-0.108815	184.8	-0.1240834
185	1.060194	185	1.020613	185	1.068111	185	1.077154	185	1.018826	185	1.093096	185	1.115529	185	-0.1607019	185	-0.1301724	185	-0.1894719	185	-0.1371073	185	-0.1113463	185	-0.1458722	185	-0.1126316	185	-0.1060631	185	-0.1243103
185.2	1.061295	185.2	1.026597	185.2	1.063048	185.2	1.074719	185.2	1.023123	185.2	1.096797	185.2	1.109454	185.2	-0.1627998	185.2	-0.1313785	185.2	-0.1878539	185.2	-0.1368326	185.2	-0.1139294	185.2	-0.1459498	185.2	-0.1094259	185.2	-0.1042376	185.2	-0.1266821
185.4	1.05942	185.4	1.024319	185.4	1.063377	185.4	1.075179	185.4	1.020567	185.4	1.095653	185.4	1.114257	185.4	-0.1611922	185.4	-0.12682	185.4	-0.1870171	185.4	-0.1377261	185.4	-0.1069198	185.4	-0.1498016	185.4	-0.1137975	185.4	-0.1064266	185.4	-0.1235564
185.6	1.06135	185.6	1.023965	185.6	1.068143	185.6	1.075107	185.6	1.025431	185.6	1.096837	185.6	1.112803	185.6	-0.1548179	185.6	-0.133779	185.6	-0.1860539	185.6	-0.1384286	185.6	-0.1078554	185.6	-0.149461	185.6	-0.1096802	185.6	-0.1040527	185.6	-0.125788
185.8	1.066651	185.8	1.022943	185.8	1.06935	185.8	1.075325	185.8	1.022747	185.8	1.099466	185.8	1.114529	185.8	-0.1656196	185.8	-0.1320748	185.8	-0.187491	185.8	-0.1371076	185.8	-0.1095758	185.8	-0.1424025	185.8	-0.1112685	185.8	-0.1038745	185.8	-0.125586
186	1.066311	186	1.020604	186	1.071573	186	1.079306	186	1.023562	186	1.100372	186	1.113167	186	-0.1616461	186	-0.1248335	186	-0.1882676	186	-0.1415326	186	-0.1118511	186	-0.1475894	186	-0.1085389	186	-0.1061963	186	-0.1288036
186.2	1.066086	186.2	1.022943	186.2	1.068056	186.2	1.073441	186.2	1.023436	186.2	1.094399	186.2	1.111523	186.2	-0.1565094	186.2	-0.1317849	186.2	-0.1855221	186.2	-0.1357959	186.2	-0.1083577	186.2	-0.1458856	186.2	-0.110262	186.2	-0.1025645	186.2	-0.1229601
186.4	1.064387	186.4	1.026648	186.4	1.070377	186.4	1.074451	186.4	1.023363	186.4	1.097578	186.4	1.111239	186.4	-0.1614389	186.4	-0.127401	186.4	-0.1863428	186.4	-0.1359918	186.4	-0.1140278	186.4	-0.1488433	186.4	-0.1060824	186.4	-0.1023863	186.4	-0.1249758
186.6	1.063357	186.6	1.025019	186.6	1.066167	186.6	1.076288	186.6	1.021085	186.6	1.096939	186.6	1.116612	186.6	-0.1607673	186.6	-0.1307068	186.6	-0.186795	186.6	-0.1345192	186.6	-0.1057803	186.6	-0.1444393	186.6	-0.1109231	186.6	-0.1012131	186.6	-0.1240504
186.8	1.064427	186.8	1.02461	186.8	1.072131	186.8	1.0764	186.8	1.025458	186.8	1.100109	186.8	1.115186	186.8	-0.1635344	186.8	-0.1317469	186.8	-0.1876106	186.8	-0.1370664	186.8	-0.1101473	186.8	-0.1441281	186.8	-0.1074683	186.8	-0.103126	186.8	-0.1221315
187	1.064436	187	1.026762	187	1.071616	187	1.079981	187	1.018326	187	1.099059	187	1.117082	187	-0.1590018	187	-0.1278391	187	-0.1906071	187	-0.137903	187	-0.1087764	187	-0.1451295	187	-0.1105152	187	-0.1021531	187	-0.1214161
187.2	1.066526	187.2	1.027924	187.2	1.070714	187.2	1.081365	187.2	1.021667	187.2	1.095716	187.2	1.113575	187.2	-0.1572492	187.2	-0.1223154	187.2	-0.1864711	187.2	-0.1375928	187.2	-0.111524	187.2	-0.1442132	187.2	-0.1117389	187.2	-0.1027777	187.2	-0.1227682
187.4	1.062448	187.4	1.027483	187.4	1.070331	187.4	1.079888	187.4	1.022896	187.4	1.097578	187.4	1.118207	187.4	-0.1579335	187.4	-0.1283153	187.4	-0.1857159	187.4	-0.1374511	187.4	-0.1093997	187.4	-0.1472318	187.4	-0.1132901	187.4	-0.1008628	187.4	-0.1186532
187.6	1.066531	187.6	1.024862	187.6	1.06926	187.6	1.075431	187.6	1.022583	187.6	1.098496	187.6	1.112013	187.6	-0.1640382	187.6	-0.1242146	187.6	-0.1871626	187.6	-0.1336119	187.6	-0.1103397	187.6	-0.1454367	187.6	-0.1041145	187.6	-0.1026798	187.6	-0.1213009
187.8	1.064026	187.8	1.024324	187.8	1.071827	187.8	1.078069	187.8	1.023946	187.8	1.098275	187.8	1.121141	187.8	-0.1607281	187.8	-0.1284808	187.8	-0.1858635	187.8	-0.1369858	187.8	-0.1100115	187.8	-0.1411961	187.8	-0.1094923	187.8	-0.1017744	187.8	-0.1221546
188	1.061534	188	1.027877	188	1.072056	188	1.076461	188	1.02309	188	1.100246	188	1.112598	188	-0.1572137	188	-0.1288634	188	-0.1847325	188	-0.1351803	188	-0.1113788	188	-0.145361	188	-0.1065345	188	-0.1038588	188	-0.1212854
188.2	1.065862	188.2	1.023459	188.2	1.070681	188.2	1.080378	188.2	1.022609	188.2	1.096587	188.2	1.111922	188.2	-0.1595441	188.2	-0.130938	188.2	-0.1812161	188.2	-0.1357629	188.2	-0.1037753	188.2	-0.141815	188.2	-0.1103056	188.2	-0.1066366	188.2	-0.1209568
188.4	1.062835	188.4	1.0272	188.4	1.072294	188.4	1.077871	188.4	1.025622	188.4	1.09971	188.4	1.11321	188.4	-0.1611793	188.4	-0.1286791	188.4	-0.1808282	188.4	-0.1315228	188.4	-0.1034354	188.4	-0.1425913	188.4	-0.1070656	188.4	-0.09889044	188.4	-0.1209721
188.6	1.063479	188.6	1.026282	188.6	1.065348	188.6	1.079343	188.6	1.02688	188.6	1.107239	188.6	1.116194	188.6	-0.1577738	188.6	-0.12564	188.6	-0.1872534	188.6	-0.1327904	188.6	-0.1092153	188.6	-0.1469554	188.6	-0.1108768	188.6	-0.1055213	188.6	-0.1184501
188.8	1.066121	188.8	1.024048	188.8	1.071844	188.8	1.075109	188.8	1.025032	188.8	1.095065	188.8	1.111775	188.8	-0.1581971	188.8	-0.1258353	188.8	-0.1851398	188.8	-0.1338867	188.8	-0.1067032	188.8	-0.1443235	188.8	-0.1084764	188.8	-0.1046008	188.8	-0.1220464
189	1.065978	189	1.024158	189	1.073694	189	1.078241	189	1.020891	189	1.098679	189	1.118383	189	-0.1612936	189	-0.1279151	189	-0.1877863	189	-0.1377089	189	-0.1061608	189	-0.1393218	189	-0.1059757	189	-0.1010667	189	-0.120568
189.2	1.067608	189.2	1.026621	189.2	1.070713	189.2	1.07812	189.2	1.021941	189.2	1.099815	189.2	1.111748	189.2	-0.1584835	189.2	-0.1247286	189.2	-0.1871033	189.2	-0.1345277	189.2	-0.1078722	189.2	-0.1439917	189.2	-0.1058212	189.2	-0.09937065	189.2	-0.1191321
189.4	1.069808	189.4	1.03086	189.4	1.072996	189.4	1.082558	189.4	1.02352	189.4	1.097408	189.4	1.109733	189.4	-0.1544686	189.4	-0.12652	189.4	-0.1868155	189.4	-0.135013	189.4	-0.1061986	189.4	-0.1421193	189.4	-0.1084011	189.4	-0.1054744	189.4	-0.1219641
189.6	1.063688	189.6	1.025125	189.6	1.069934	189.6	1.077716	189.6	1.024486	189.6	1.099128	189.6	1.114	189.6	-0.1624196	189.6	-0.1243251	189.6	-0.1823312	189.6	-0.1365473	189.6	-0.1077035	189.6	-0.1427456	189.6	-0.1050854	189.6	-0.1022424	189.6	-0.1220036
189.8	1.060574	189.8	1.025828	189.8	1.069738	189.8	1.079715	189.8	1.025848	189.8	1.098017	189.8	1.112878	189.8	-0.162207	189.8	-0.1222083	189.8	-0.1868972	189.8	-0.1367936	189.8	-0.1049157	189.8	-0.1439015	189.8	-0.1090726	189.8	-0.1022459	189.8	-0.1209698
190	1.061695	190	1.027426	190	1.072868	190	1.080137	190	1.02514	190	1.10475	190	1.110953	190	-0.1572215	190	-0.1237457	190	-0.1791399	190	-0.1351366	190	-0.1108073	190	-0.1420469	190	-0.1056102	190	-0.09937234	190	-0.1230315
190.2	1.064871	190.2	1.023131	190.2	1.073588	190.2	1.084347	190.2	1.027194	190.2	1.102638	190.2	1.116382	190.2	-0.1579577	190.2	-0.1256962	190.2	-0.1828806	190.2	-0.1385394	190.2	-0.1077279	190.2	-0.1409047	190.2	-0.1047655	190.2	-0.09892997	190.2	-0.1175942
190.4	1.068258	190.4	1.023095	190.4	1.072469	190.4	1.080698	190.4	1.025958	190.4	1.097484	190.4	1.120203	190.4	-0.1552613	190.4	-0.1203025	190.4	-0.1828509	190.4	-0.1350842	190.4	-0.1080244	190.4	-0.1456629	190.4	-0.1035434	190.4	-0.1008034	190.4	-0.1216977
190.6	1.064512	190.6	1.028658	190.6	1.067342	190.6	1.080713	190.6	1.024438	190.6	1.10297	190.6	1.11649	190.6	-0.160678	190.6	-0.1254752	190.6	-0.1854017	190.6	-0.1345452	190.6	-0.1037879	190.6	-0.1391474	190.6	-0.1075526	190.6	-0.1027873	190.6	-0.1230688
190.8	1.066707	190.8	1.026774	190.8	1.077088	190.8	1.077929	190.8	1.023866	190.8	1.099149	190.8	1.111353	190.8	-0.1538154	190.8	-0.1222545	190.8	-0.1823103	190.8	-0.1350562	190.8	-0.1051379	190.8	-0.1445507	190.8	-0.1047971	190.8	-0.09955793	190.8	-0.1158269
191	1.069538	191	1.023728	191	1.069464	191	1.079284	191	1.026213	191	1.095908	191	1.112306	191	-0.1543686	191	-0.1210857	191	-0.183271	191	-0.1373356	191	-0.1050832	191	-0.1436752	191	-0.1055466	191	-0.09953436	191	-0.1199786
191.2	1.063544	191.2	1.023771	191.2	1.071864	191.2	1.079506	191.2	1.024435	191.2	1.099238	191.2	1.115892	191.2	-0.1576049	191.2	-0.1257524	191.2	-0.1828916	191.2	-0.1340059	191.2	-0.1096995	191.2	-0.143059	191.2	-0.1063898	191.2	-0.101382	191.2	-0.1202712
191.4	1.071856	191.4	1.024516	191.4	1.073946	191.4	1.083689	191.4	1.022769	191.4	1.102338	191.4	1.117683	191.4	-0.1555089	191.4	-0.1313557	191.4	-0.1813196	191.4	-0.1331003	191.4	-0.1023071	191.4	-0.1486122	191.4	-0.1044156	191.4	-0.1008416	191.4	-0.1199323
191.6	1.065426	191.6	1.028229	191.6	1.069979	191.6	1.077297	191.6	1.020344	191.6	1.100585	191.6	1.116522	191.6	-0.1581321	191.6	-0.1233513	191.6	-0.1822886	191.6	-0.1288081	191.6	-0.106153	191.6	-0.1436253	191.6	-0.1063267	191.6	-0.1042373	191.6	-0.1168167
191.8	1.063222	191.8	1.025511	191.8	1.075422	191.8	1.080961	191.8	1.023021	191.8	1.103283	191.8	1.115916	191.8	-0.1579639	191.8	-0.1281217	191.8	-0.1827771	191.8	-0.1299124	191.8	-0.1040298	191.8	-0.1417874	191.8	-0.1047314	191.8	-0.100098	191.8	-0.1187068
192	1.068284	192	1.023868	192	1.072024	192	1.080356	192	1.026818	192	1.104944	192	1.113287	192	-0.1564211	192	-0.1302748	192	-0.1779839	192	-0.1327255	192	-0.1014127	192	-0.142165	192	-0.1061585	192	-0.09790526	192	-0.1161903
192.2	1.061964	192.2	1.025965	192.2	1.072166	192.2	1.082946	192.2	1.027172	192.2	1.098278	192.2	1.115121	192.2	-0.1588487	192.2	-0.1229624	192.2	-0.1827853	192.2	-0.1335048	192.2	-0.1018154	192.2	-0.1408607	192.2	-0.1070077	192.2	-0.1018826	192.2	-0.1204166
192.4	1.066752	192.4	1.025214	192.4	1.076646	192.4	1.08264	192.4	1.023509	192.4	1.100113	192.4	1.114187	192.4	-0.1590173	192.4	-0.1225201	192.4	-0.1824128	192.4	-0.1338499	192.4	-0.1049575	192.4	-0.1385034	192.4	-0.1045102	192.4	-0.09381487	192.4	-0.1164012
192.6	1.069294	192.6	1.026388	192.6	1.072927	192.6	1.082503	192.6	1.025755	192.6	1.102591	192.6	1.117785	192.6	-0.1535013	192.6	-0.1236809	192.6	-0.1838251	192.6	-0.132332	192.6	-0.1016855	192.6	-0.1427951	192.6	-0.1017723	192.6	-0.1011418	192.6	-0.1164092
192.8	1.063391	192.8	1.028139	192.8	1.070289	192.8	1.079631	192.8	1.028825	192.8	1.104136	192.8	1.11289	192.8	-0.1585691	192.8	-0.1236117	192.8	-0.1827211	192.8	-0.1289373	192.8	-0.1038543	192.8	-0.1402211	192.8	-0.1027419	192.8	-0.09853623	192.8	-0.1164839
193	1.064947	193	1.029535	193	1.070024	193	1.079552	193	1.029467	193	1.100913	193	1.115838	193	-0.1537295	193	-0.120434	193	-0.1799608	193	-0.135873	193	-0.1062043	193	-0.1384935	193	-0.1073477	193	-0.09684736	193	-0.1182855
193.2	1.067504	193.2	1.031497	193.2	1.074283	193.2	1.082628	193.2	1.02918	193.2	1.101928	193.2	1.114939	193.2	-0.1531137	193.2	-0.1228301	193.2	-0.1807836	193.2	-0.1276122	193.2	-0.1051229	193.2	-0.1373116	193.2	-0.1067348	193.2	-0.09996077	193.2	-0.1144462
193.4	1.066211	193.4	1.029503	193.4	1.074131	193.4	1.080378	193.4	1.025331	193.4	1.103799	193.4	1.119507	193.4	-0.1549618	193.4	-0.1228668	193.4	-0.1785943	193.4	-0.1333332	193.4	-0.1031682	193.4	-0.1410781	193.4	-0.1056655	193.4	-0.1028675	193.4	-0.1212806
193.6	1.064357	193.6	1.030227	193.6	1.073603	193.6	1.08078	193.6	1.027507	193.6	1.100375	193.6	1.118448	193.6	-0.1563628	193.6	-0.1194772	193.6	-0.1787008	193.6	-0.1318578	193.6	-0.1062092	193.6	-0.1386653	193.6	-0.1019291	193.6	-0.1044637	193.6	-0.1186673
193.8	1.06564	193.8	1.034401	193.8	1.080939	193.8	1.07747	193.8	1.02818	193.8	1.099814	193.8	1.116695	193.8	-0.1553929	193.8	-0.119908	193.8	-0.1794486	193.8	-0.1301551	193.8	-0.1076058	193.8	-0.1379124	193.8	-0.1047955	193.8	-0.09882312	193.8	-0.118838
194	1.067909	194	1.028805	194	1.075181	194	1.080548	194	1.024102	194	1.101786	194	1.117283	194	-0.1569153	194	-0.1241949	194	-0.1807591	194	-0.1283772	194	-0.1039528	194	-0.1403133	194	-0.1056516	194	-0.1003472	194	-0.1192343
194.2	1.067667	194.2	1.029236	194.2	1.070643	194.2	1.08118	194.2	1.027705	194.2	1.101926	194.2	1.118176	194.2	-0.1520536	194.2	-0.1179534	194.2	-0.1811999	194.2	-0.1282318	194.2	-0.1052316	194.2	-0.1418976	194.2	-0.1099323	194.2	-0.09940522	194.2	-0.1203333
194.4	1.068048	194.4	1.02901	194.4	1.075587	194.4	1.086081	194.4	1.023471	194.4	1.10065	194.4	1.117193	194.4	-0.1556273	194.4	-0.1262084	194.4	-0.1800359	194.4	-0.1293807	194.4	-0.1005504	194.4	-0.13592	194.4	-0.1073769	194.4	-0.1008656	194.4	-0.1215601
194.6	1.065333	194.6	1.0261	194.6	1.075918	194.6	1.081179	194.6	1.024517	194.6	1.105467	194.6	1.116979	194.6	-0.1549725	194.6	-0.1210925	194.6	-0.1762463	194.6	-0.1297885	194.6	-0.104598	194.6	-0.1418663	194.6	-0.1019364	194.6	-0.09642059	194.6	-0.120401
194.8	1.071161	194.8	1.031187	194.8	1.079003	194.8	1.07918	194.8	1.024081	194.8	1.101604	194.8	1.116646	194.8	-0.1528752	194.8	-0.1224401	194.8	-0.1847992	194.8	-0.127367	194.8	-0.1003779	194.8	-0.1405104	194.8	-0.102822	194.8	-0.09994826	194.8	-0.1171652
195	1.068031	195	1.028481	195	1.074618	195	1.080487	195	1.026829	195	1.106131	195	1.116544	195	-0.1566391	195	-0.1249837	195	-0.1817625	195	-0.1345545	195	-0.1023497	195	-0.1386548	195	-0.1039846	195	-0.09775104	195	-0.1199632
195.2	1.072841	195.2	1.023338	195.2	1.072047	195.2	1.08034	195.2	1.0294	195.2	1.101576	195.2	1.116723	195.2	-0.1510196	195.2	-0.1234875	195.2	-0.1756712	195.2	-0.1341632	195.2	-0.1041152	195.2	-0.1401849	195.2	-0.1001417	195.2	-0.09939272	195.2	-0.1189246
195.4	1.065874	195.4	1.028272	195.4	1.075764	195.4	1.085299	195.4	1.02952	195.4	1.10624	195.4	1.115225	195.4	-0.153309	195.4	-0.1206939	195.4	-0.1807176	195.4	-0.1301597	195.4	-0.1015842	195.4	-0.139431	195.4	-0.09681714	195.4	-0.09666142	195.4	-0.1235219
195.6	1.06777	195.6	1.027404	195.6	1.071798	195.6	1.08178	195.6	1.026427	195.6	1.1045	195.6	1.118478	195.6	-0.1495471	195.6	-0.1177956	195.6	-0.1781043	195.6	-0.1282033	195.6	-0.1046256	195.6	-0.1446003	195.6	-0.1061876	195.6	-0.1014638	195.6	-0.1147659
195.8	1.068465	195.8	1.03189	195.8	1.080156	195.8	1.083531	195.8	1.027592	195.8	1.103185	195.8	1.120058	195.8	-0.153443	195.8	-0.1226583	195.8	-0.1796708	195.8	-0.1335742	195.8	-0.1022207	195.8	-0.1398313	195.8	-0.1057617	195.8	-0.1012809	195.8	-0.119536
196	1.071675	196	1.028934	196	1.078173	196	1.084127	196	1.02932	196	1.104853	196	1.117557	196	-0.1573581	196	-0.1189344	196	-0.1768546	196	-0.1258987	196	-0.1056591	196	-0.1381581	196	-0.1060902	196	-0.09983088	196	-0.1201543
196.2	1.066853	196.2	1.027898	196.2	1.07723	196.2	1.083542	196.2	1.026917	196.2	1.103823	196.2	1.118339	196.2	-0.1578698	196.2	-0.1224771	196.2	-0.1787134	196.2	-0.1297376	196.2	-0.106688	196.2	-0.1362162	196.2	-0.1030915	196.2	-0.09403071	196.2	-0.1142402
196.4	1.070981	196.4	1.029582	196.4	1.076197	196.4	1.082612	196.4	1.027684	196.4	1.103741	196.4	1.122087	196.4	-0.1550261	196.4	-0.1246121	196.4	-0.1791088	196.4	-0.1314622	196.4	-0.1023235	196.4	-0.1399396	196.4	-0.1018468	196.4	-0.09278437	196.4	-0.1113861
196.6	1.069124	196.6	1.027855	196.6	1.076049	196.6	1.077587	196.6	1.030479	196.6	1.104622	196.6	1.113509	196.6	-0.1526374	196.6	-0.1218299	196.6	-0.1734432	196.6	-0.1277001	196.6	-0.1011409	196.6	-0.1373069	196.6	-0.1017354	196.6	-0.09436283	196.6	-0.1171382
196.8	1.072415	196.8	1.033188	196.8	1.08081	196.8	1.086678	196.8	1.030544	196.8	1.100861	196.8	1.117335	196.8	-0.1521082	196.8	-0.1187488	196.8	-0.1807167	196.8	-0.1258927	196.8	-0.09974261	196.8	-0.1380023	196.8	-0.1036029	196.8	-0.09271975	196.8	-0.1202567
197.02	1.07354	197.02	1.028882	197.02	1.077951	197.02	1.082023	197.02	1.029776	197.02	1.102599	197.02	1.119592	197.02	-0.1503614	197	-0.1150926	197	-0.1785237	197	-0.1277031	197	-0.1018339	197	-0.137122	197	-0.1030497	197	-0.09222196	197	-0.1188139
197.2	1.068514	197.2	1.030282	197.2	1.074817	197.2	1.080971	197.2	1.029822	197.2	1.105262	197.2	1.116659	197.2	-0.1567626	197.2	-0.1176495	197.2	-0.1731656	197.2	-0.1282111	197.2	-0.1050514	197.2	-0.133065	197.2	-0.1052218	197.2	-0.09647153	197.2	-0.1157891
197.4	1.069302	197.4	1.030054	197.4	1.077097	197.4	1.080846	197.4	1.031836	197.4	1.101647	197.4	1.11619	197.4	-0.1504372	197.4	-0.1175657	197.4	-0.1819835	197.4	-0.1301241	197.4	-0.09824487	197.4	-0.1362185	197.4	-0.1000176	197.4	-0.09405598	197.4	-0.1119461
197.6	1.064952	197.6	1.035478	197.6	1.078055	197.6	1.081887	197.6	1.030914	197.6	1.103931	197.6	1.113839	197.6	-0.1561486	197.6	-0.1205781	197.6	-0.1722543	197.6	-0.1282253	197.6	-0.101719	197.6	-0.1363958	197.6	-0.09958604	197.6	-0.09695795	197.6	-0.1150953
197.8	1.069053	197.8	1.030451	197.8	1.079518	197.8	1.080484	197.8	1.033306	197.8	1.107486	197.8	1.120178	197.8	-0.1522136	197.8	-0.1200713	197.8	-0.1792198	197.8	-0.1279248	197.8	-0.1006689	197.8	-0.1365264	197.8	-0.1015832	197.8	-0.09618614	197.8	-0.1192443
198	1.067711	198	1.025403	198	1.072899	198	1.084885	198	1.029644	198	1.098725	198	1.119678	198	-0.1576756	198	-0.1152316	198	-0.1798092	198	-0.1322188	198	-0.09916422	198	-0.1304551	198	-0.1018619	198	-0.09335675	198	-0.1152746
198.2	1.069493	198.2	1.027437	198.2	1.077683	198.2	1.085276	198.2	1.028326	198.2	1.108522	198.2	1.119182	198.2	-0.1532436	198.2	-0.1178728	198.2	-0.1778225	198.2	-0.128526	198.2	-0.1044293	198.2	-0.1311024	198.2	-0.1021269	198.2	-0.09426806	198.2	-0.1158095
198.4	1.069628	198.4	1.027291	198.4	1.079708	198.4	1.078609	198.4	1.030334	198.4	1.112666	198.4	1.124487	198.4	-0.1556393	198.4	-0.1169599	198.4	-0.1787201	198.4	-0.1234155	198.4	-0.1033955	198.4	-0.1384827	198.4	-0.09707198	198.4	-0.09543427	198.4	-0.1184516
198.6	1.069563	198.6	1.027787	198.6	1.076134	198.6	1.085102	198.6	1.030158	198.6	1.108985	198.6	1.119605	198.6	-0.1524145	198.6	-0.1188946	198.6	-0.1792004	198.6	-0.1283615	198.6	-0.1013771	198.6	-0.1362374	198.6	-0.1018563	198.6	-0.09102228	198.6	-0.1164759
198.8	1.071066	198.8	1.030299	198.8	1.077376	198.8	1.08647	198.8	1.029223	198.8	1.105033	198.8	1.119119	198.8	-0.1515498	198.8	-0.1196395	198.8	-0.1760845	198.8	-0.124897	198.8	-0.09912954	198.8	-0.1378649	198.8	-0.1019204	198.8	-0.09651323	198.8	-0.1145011
199	1.073571	199	1.026365	199	1.076366	199	1.08787	199	1.034819	199	1.103103	199	1.122408	199	-0.1559641	199	-0.1166679	199	-0.1755358	199	-0.1274402	199	-0.1046111	199	-0.1399204	199	-0.09909203	199	-0.08991919	199	-0.1175172
199.2	1.074589	199.2	1.035599	199.2	1.076933	199.2	1.088175	199.2	1.028023	199.2	1.103735	199.2	1.11971	199.2	-0.1553372	199.2	-0.1200578	199.2	-0.1788635	199.2	-0.1290327	199.2	-0.1021806	199.2	-0.1424498	199.2	-0.1017799	199.2	-0.09975522	199.2	-0.1154476
199.4	1.068963	199.4	1.030855	199.4	1.078129	199.4	1.086237	199.4	1.026527	199.4	1.103468	199.4	1.118074	199.4	-0.1517893	199.4	-0.1225365	199.4	-0.1780335	199.4	-0.1290678	199.4	-0.1010134	199.4	-0.1364111	199.4	-0.09871083	199.4	-0.09512586	199.4	-0.1157483
199.6	1.068123	199.6	1.034051	199.6	1.076571	199.6	1.084685	199.6	1.029478	199.6	1.104964	199.6	1.119385	199.6	-0.1545959	199.6	-0.1169294	199.6	-0.1787494	199.6	-0.1267027	199.6	-0.1002617	199.6	-0.1364428	199.6	-0.1020435	199.6	-0.09340055	199.6	-0.1136712
199.8	1.067728	199.8	1.031982	199.8	1.078757	199.8	1.08684	199.8	1.028906	199.8	1.108566	199.8	1.120066	199.8	-0.1543878	199.8	-0.1171697	199.8	-0.1769829	199.8	-0.1272862	199.8	-0.100713	199.8	-0.133143	199.8	-0.1009898	199.8	-0.09591504	199.8	-0.1158326
200	1.047091	200	1.006421	200	1.064099	200	1.063222	200	1.010855	200	1.092599	200	1.109463	200	-0.1590512	200	-0.1411192	200	-0.2002176	200	-0.1417561	200	-0.1129771	200	-0.1507348	200	-0.1153636	200	-0.0996067	200	-0.1193189
200.2	1.045575	200.2	1.008246	200.2	1.058318	200.2	1.068396	200.2	1.013182	200.2	1.09076	200.2	1.111862	200.2	-0.1566975	200.2	-0.1366451	200.2	-0.1944338	200.2	-0.1419542	200.2	-0.1124551	200.2	-0.1533479	200.2	-0.1111038	200.2	-0.09942014	200.2	-0.1176897
200.4	1.048581	200.4	1.008462	200.4	1.058111	200.4	1.066974	200.4	1.012541	200.4	1.094551	200.4	1.111092	200.4	-0.1567423	200.4	-0.1365706	200.4	-0.1931906	200.4	-0.1414919	200.4	-0.1144622	200.4	-0.1512342	200.4	-0.1140451	200.4	-0.1061589	200.4	-0.1176545
200.6	1.043398	200.6	1.005204	200.6	1.06432	200.6	1.065871	200.6	1.0123	200.6	1.094106	200.6	1.110907	200.6	-0.1530159	200.6	-0.1381608	200.6	-0.194137	200.6	-0.1385384	200.6	-0.1141603	200.6	-0.1513284	200.6	-0.1089486	200.6	-0.09727774	200.6	-0.1199828
200.8	1.050184	200.8	1.007966	200.8	1.068166	200.8	1.070273	200.8	1.012826	200.8	1.093773	200.8	1.110785	200.8	-0.1549061	200.8	-0.1364698	200.8	-0.19618	200.8	-0.1437907	200.8	-0.1085534	200.8	-0.1478911	200.8	-0.1051692	200.8	-0.09909963	200.8	-0.1139705
201	1.053597	201	1.007612	201	1.061667	201	1.066293	201	1.014442	201	1.091645	201	1.114424	201	-0.1560194	201	-0.1398343	201	-0.1964628	201	-0.1422165	201	-0.1119675	201	-0.1499896	201	-0.1071765	201	-0.09723378	201	-0.1151147
201.2	1.046242	201.2	1.010339	201.2	1.065694	201.2	1.067542	201.2	1.010726	201.2	1.091907	201.2	1.108613	201.2	-0.1567831	201.2	-0.1371806	201.2	-0.1907813	201.2	-0.1388734	201.2	-0.112926	201.2	-0.1538748	201.2	-0.1050554	201.2	-0.1034912	201.2	-0.1156726
201.4	1.048966	201.4	1.008392	201.4	1.067355	201.4	1.071826	201.4	1.01202	201.4	1.095695	201.4	1.113036	201.4	-0.1473896	201.4	-0.1364906	201.4	-0.1967171	201.4	-0.1384743	201.4	-0.1143821	201.4	-0.147454	201.4	-0.1068765	201.4	-0.09845296	201.4	-0.1132679
201.6	1.051375	201.6	1.01253	201.6	1.067028	201.6	1.07043	201.6	1.013325	201.6	1.094218	201.6	1.114863	201.6	-0.149122	201.6	-0.1379292	201.6	-0.1921806	201.6	-0.1366459	201.6	-0.1136052	201.6	-0.1488029	201.6	-0.1075441	201.6	-0.1017169	201.6	-0.1081894
201.8	1.053732	201.8	1.015217	201.8	1.0654	201.8	1.069245	201.8	1.016795	201.8	1.091659	201.8	1.111264	201.8	-0.1478227	201.8	-0.1378655	201.8	-0.1957731	201.8	-0.1416122	201.8	-0.1133908	201.8	-0.1476226	201.8	-0.1096477	201.8	-0.101518	201.8	-0.1125166
202	1.054678	202	1.011216	202	1.066598	202	1.072934	202	1.011428	202	1.094085	202	1.116135	202	-0.1473	202	-0.1323579	202	-0.1912656	202	-0.1381081	202	-0.1102786	202	-0.1513309	202	-0.1051095	202	-0.1052979	202	-0.1148594
202.2	1.059377	202.2	1.019652	202.2	1.070637	202.2	1.074127	202.2	1.014008	202.2	1.09571	202.2	1.110077	202.2	-0.1488847	202.2	-0.1353303	202.2	-0.1960585	202.2	-0.1353785	202.2	-0.1123262	202.2	-0.1497319	202.2	-0.1084122	202.2	-0.09637256	202.2	-0.1120867
202.4	1.055138	202.4	1.009176	202.4	1.06686	202.4	1.071579	202.4	1.010347	202.4	1.093716	202.4	1.112911	202.4	-0.1517925	202.4	-0.1332251	202.4	-0.195779	202.4	-0.1368044	202.4	-0.109556	202.4	-0.1487591	202.4	-0.111124	202.4	-0.09758744	202.4	-0.1086193
202.6	1.059969	202.6	1.015954	202.6	1.065729	202.6	1.074008	202.6	1.015194	202.6	1.090044	202.6	1.113621	202.6	-0.144707	202.6	-0.1338511	202.6	-0.1899673	202.6	-0.1408741	202.6	-0.1142143	202.6	-0.1483179	202.6	-0.1065357	202.6	-0.09719533	202.6	-0.1090551
202.8	1.064222	202.8	1.017694	202.8	1.066553	202.8	1.074617	202.8	1.01317	202.8	1.095208	202.8	1.120163	202.8	-0.1479251	202.8	-0.1334611	202.8	-0.1950304	202.8	-0.1404123	202.8	-0.1089074	202.8	-0.1469644	202.8	-0.1040463	202.8	-0.09985609	202.8	-0.1097192
203	1.05805	203	1.017622	203	1.067647	203	1.068233	203	1.016332	203	1.092776	203	1.112307	203	-0.1487922	203	-0.132272	203	-0.1932397	203	-0.1343355	203	-0.1121643	203	-0.1503503	203	-0.1080124	203	-0.1068373	203	-0.108182
203.2	1.062231	203.2	1.014929	203.2	1.068595	203.2	1.070574	203.2	1.012445	203.2	1.093459	203.2	1.116798	203.2	-0.149429	203.2	-0.132567	203.2	-0.1934274	203.2	-0.1338092	203.2	-0.1041018	203.2	-0.147081	203.2	-0.1107297	203.2	-0.09561674	203.2	-0.1078135
203.4	1.06576	203.4	1.01795	203.4	1.070834	203.4	1.074045	203.4	1.017337	203.4	1.092841	203.4	1.118521	203.4	-0.147371	203.4	-0.1338924	203.4	-0.1921836	203.4	-0.1388767	203.4	-0.1076328	203.4	-0.1428584	203.4	-0.110321	203.4	-0.09637119	203.4	-0.1094497
203.6	1.066027	203.6	1.019597	203.6	1.067243	203.6	1.07096	203.6	1.018882	203.6	1.092407	203.6	1.113681	203.6	-0.1476522	203.6	-0.1365893	203.6	-0.1910004	203.6	-0.1368833	203.6	-0.1103023	203.6	-0.1473165	203.6	-0.1064223	203.6	-0.1018516	203.6	-0.1080731
203.8	1.062905	203.8	1.020229	203.8	1.071479	203.8	1.071259	203.8	1.017161	203.8	1.098731	203.8	1.113212	203.8	-0.1488042	203.8	-0.1282057	203.8	-0.1941176	203.8	-0.1376337	203.8	-0.1128085	203.8	-0.1489225	203.8	-0.1068307	203.8	-0.09508047	203.8	-0.1113296
204	1.066087	204	1.022004	204	1.067243	204	1.07248	204	1.016726	204	1.095725	204	1.115235	204	-0.1493892	204	-0.1313516	204	-0.1915483	204	-0.1357685	204	-0.1139361	204	-0.1484269	204	-0.1057912	204	-0.09658553	204	-0.107473
204.2	1.062646	204.2	1.018852	204.2	1.06865	204.2	1.074003	204.2	1.016306	204.2	1.09292	204.2	1.115901	204.2	-0.1465944	204.2	-0.1322051	204.2	-0.1928207	204.2	-0.1349592	204.2	-0.1071051	204.2	-0.1461562	204.2	-0.1046605	204.2	-0.09700335	204.2	-0.1084283
204.4	1.069672	204.4	1.017164	204.4	1.066777	204.4	1.07223	204.4	1.020156	204.4	1.098167	204.4	1.113283	204.4	-0.150326	204.4	-0.1299249	204.4	-0.1949832	204.4	-0.1364699	204.4	-0.1113233	204.4	-0.1456699	204.4	-0.1056183	204.4	-0.0933688	204.4	-0.1041314
204.6	1.070304	204.6	1.026811	204.6	1.070401	204.6	1.073518	204.6	1.019572	204.6	1.09502	204.6	1.113377	204.6	-0.1493679	204.6	-0.1328484	204.6	-0.1888558	204.6	-0.1330529	204.6	-0.1081463	204.6	-0.1501141	204.6	-0.1094321	204.6	-0.09534708	204.6	-0.1078145
204.8	1.073523	204.8	1.021221	204.8	1.075699	204.8	1.070943	204.8	1.016394	204.8	1.093079	204.8	1.119565	204.8	-0.1499703	204.8	-0.1355479	204.8	-0.1906094	204.8	-0.1370957	204.8	-0.1091977	204.8	-0.1488022	204.8	-0.1062713	204.8	-0.0947878	204.8	-0.1079761
205	1.075261	205	1.022791	205	1.07394	205	1.076362	205	1.017744	205	1.096226	205	1.118673	205	-0.1457775	205	-0.1284622	205	-0.1930556	205	-0.1362367	205	-0.1075537	205	-0.1438403	205	-0.1067555	205	-0.0994859	205	-0.1060353
205.2	1.071677	205.2	1.021345	205.2	1.074094	205.2	1.072542	205.2	1.015293	205.2	1.096488	205.2	1.112492	205.2	-0.1458844	205.2	-0.1291612	205.2	-0.1918298	205.2	-0.1340878	205.2	-0.1086872	205.2	-0.1483299	205.2	-0.1044351	205.2	-0.09367237	205.2	-0.1062922
205.4	1.076181	205.4	1.024476	205.4	1.074247	205.4	1.077871	205.4	1.017993	205.4	1.09562	205.4	1.111825	205.4	-0.1465969	205.4	-0.1285084	205.4	-0.187106	205.4	-0.1348635	205.4	-0.1095501	205.4	-0.1420389	205.4	-0.1044822	205.4	-0.09878954	205.4	-0.1047863
205.6	1.078461	205.6	1.024076	205.6	1.071921	205.6	1.073337	205.6	1.019846	205.6	1.09476	205.6	1.116588	205.6	-0.145204	205.6	-0.1314212	205.6	-0.1901425	205.6	-0.1359325	205.6	-0.1058097	205.6	-0.1485379	205.6	-0.1052931	205.6	-0.09416286	205.6	-0.1056768
205.8	1.077934	205.8	1.029469	205.8	1.070447	205.8	1.075157	205.8	1.014177	205.8	1.091139	205.8	1.112731	205.8	-0.1407188	205.8	-0.1297354	205.8	-0.1906843	205.8	-0.1314144	205.8	-0.1108705	205.8	-0.1463373	205.8	-0.1066259	205.8	-0.0976189	205.8	-0.1042528
206	1.083438	206	1.024257	206	1.074369	206	1.074976	206	1.015768	206	1.095528	206	1.114142	206	-0.1469547	206	-0.1313131	206	-0.1850068	206	-0.1322581	206	-0.1072839	206	-0.1448725	206	-0.1025034	206	-0.09222075	206	-0.1068007
206.2	1.073301	206.2	1.03063	206.2	1.07301	206.2	1.071972	206.2	1.019669	206.2	1.098542	206.2	1.115278	206.2	-0.1474451	206.2	-0.1334466	206.2	-0.1867853	206.2	-0.1304516	206.2	-0.1095062	206.2	-0.1497483	206.2	-0.1080971	206.2	-0.09739564	206.2	-0.1029234
206.4	1.080525	206.4	1.029955	206.4	1.074849	206.4	1.076405	206.4	1.016515	206.4	1.098217	206.4	1.112607	206.4	-0.1468822	206.4	-0.1318157	206.4	-0.1920447	206.4	-0.1360983	206.4	-0.1038343	206.4	-0.1461037	206.4	-0.1077967	206.4	-0.09960497	206.4	-0.1101921
206.6	1.080393	206.6	1.027811	206.6	1.075601	206.6	1.078175	206.6	1.018368	206.6	1.097886	206.6	1.119692	206.6	-0.1479184	206.6	-0.1274126	206.6	-0.1857311	206.6	-0.1343427	206.6	-0.1074063	206.6	-0.1443465	206.6	-0.1053027	206.6	-0.09590748	206.6	-0.1082895
206.8	1.081804	206.8	1.026499	206.8	1.070916	206.8	1.076831	206.8	1.014506	206.8	1.095282	206.8	1.116842	206.8	-0.1452869	206.8	-0.1283684	206.8	-0.1906598	206.8	-0.1305482	206.8	-0.1037811	206.8	-0.1401785	206.8	-0.1061171	206.8	-0.09666016	206.8	-0.1060255
207	1.081293	207	1.027419	207	1.074279	207	1.079262	207	1.019496	207	1.094128	207	1.110124	207	-0.1455513	207	-0.1300093	207	-0.1855516	207	-0.1334623	207	-0.107212	207	-0.1403914	207	-0.1071614	207	-0.09577513	207	-0.105393
207.2	1.086282	207.2	1.030282	207.2	1.076761	207.2	1.079341	207.2	1.02187	207.2	1.09637	207.2	1.112845	207.2	-0.1478637	207.2	-0.1292924	207.2	-0.1897605	207.2	-0.1325146	207.2	-0.1052075	207.2	-0.143958	207.2	-0.1058864	207.2	-0.1005581	207.2	-0.103033
207.4	1.084615	207.4	1.02995	207.4	1.072877	207.4	1.075837	207.4	1.017292	207.4	1.096848	207.4	1.113777	207.4	-0.1447586	207.4	-0.1280829	207.4	-0.1882064	207.4	-0.1345176	207.4	-0.1094267	207.4	-0.1455633	207.4	-0.1036443	207.4	-0.09836582	207.4	-0.1021086
207.6	1.084871	207.6	1.032342	207.6	1.077654	207.6	1.078413	207.6	1.02058	207.6	1.096884	207.6	1.116	207.6	-0.1443615	207.6	-0.1282771	207.6	-0.1894952	207.6	-0.1321978	207.6	-0.1087981	207.6	-0.1459343	207.6	-0.1060148	207.6	-0.09613627	207.6	-0.108016
207.8	1.087805	207.8	1.031489	207.8	1.077935	207.8	1.081221	207.8	1.020912	207.8	1.097838	207.8	1.114327	207.8	-0.142419	207.8	-0.1277623	207.8	-0.1874487	207.8	-0.1290548	207.8	-0.1023636	207.8	-0.1453011	207.8	-0.1065804	207.8	-0.08953013	207.8	-0.1047935
208	1.087319	208	1.030838	208	1.076615	208	1.077937	208	1.016406	208	1.096979	208	1.118289	208	-0.1444631	208	-0.1282455	208	-0.1848617	208	-0.1345757	208	-0.1040118	208	-0.1423855	208	-0.1025049	208	-0.09176965	208	-0.1032214
208.2	1.088682	208.2	1.036495	208.2	1.081699	208.2	1.078726	208.2	1.017874	208.2	1.097686	208.2	1.114803	208.2	-0.1441014	208.2	-0.127403	208.2	-0.1875642	208.2	-0.1296586	208.2	-0.1072127	208.2	-0.143581	208.2	-0.1052251	208.2	-0.09154247	208.2	-0.1005279
208.4	1.090472	208.4	1.03207	208.4	1.077649	208.4	1.079489	208.4	1.017225	208.4	1.099407	208.4	1.113972	208.4	-0.141419	208.4	-0.129203	208.4	-0.1868721	208.4	-0.1341364	208.4	-0.1034612	208.4	-0.1445202	208.4	-0.1041242	208.4	-0.09292341	208.4	-0.1039959
208.6	1.090005	208.6	1.037718	208.6	1.082839	208.6	1.080683	208.6	1.014194	208.6	1.102548	208.6	1.117849	208.6	-0.139035	208.6	-0.1276881	208.6	-0.1855702	208.6	-0.1326556	208.6	-0.1062928	208.6	-0.1434281	208.6	-0.1052475	208.6	-0.09683366	208.6	-0.104566
208.8	1.092305	208.8	1.037191	208.8	1.082117	208.8	1.081112	208.8	1.021341	208.8	1.098768	208.8	1.117965	208.8	-0.144753	208.8	-0.1278465	208.8	-0.1900162	208.8	-0.1319709	208.8	-0.1029314	208.8	-0.1456892	208.8	-0.1050488	208.8	-0.09482904	208.8	-0.1030412
209	1.093084	209	1.037598	209	1.077001	209	1.076227	209	1.021379	209	1.09802	209	1.118065	209	-0.1434542	209	-0.1267436	209	-0.1901767	209	-0.1293938	209	-0.1052878	209	-0.1415683	209	-0.1062273	209	-0.09332826	209	-0.104934
209.2	1.09444	209.2	1.032596	209.2	1.082187	209.2	1.079102	209.2	1.019684	209.2	1.099661	209.2	1.118786	209.2	-0.1421888	209.2	-0.1241067	209.2	-0.1834599	209.2	-0.1327232	209.2	-0.1043511	209.2	-0.141709	209.2	-0.1067813	209.2	-0.09661161	209.2	-0.1010432
209.4	1.098139	209.4	1.036219	209.4	1.085262	209.4	1.078812	209.4	1.018136	209.4	1.100351	209.4	1.12111	209.4	-0.1415831	209.4	-0.1285341	209.4	-0.1865045	209.4	-0.1291187	209.4	-0.1072584	209.4	-0.1403651	209.4	-0.1030581	209.4	-0.0894083	209.4	-0.1020565
209.6	1.094907	209.6	1.03555	209.6	1.079959	209.6	1.078257	209.6	1.022021	209.6	1.100203	209.6	1.114838	209.6	-0.1434454	209.6	-0.12202	209.6	-0.1879807	209.6	-0.1298264	209.6	-0.1068128	209.6	-0.1450507	209.6	-0.1062629	209.6	-0.09935831	209.6	-0.1016126
209.8	1.095123	209.8	1.036068	209.8	1.078469	209.8	1.079477	209.8	1.017636	209.8	1.099551	209.8	1.11969	209.8	-0.1474763	209.8	-0.1272724	209.8	-0.1840676	209.8	-0.1289423	209.8	-0.1013169	209.8	-0.1455458	209.8	-0.104159	209.8	-0.09606693	209.8	-0.09861928
210	1.103452	210	1.04201	210	1.078404	210	1.085004	210	1.020455	210	1.096767	210	1.11759	210	-0.1395534	210	-0.1257997	210	-0.1817011	210	-0.1306755	210	-0.1085619	210	-0.1400224	210	-0.1029475	210	-0.09086509	210	-0.1058946
210.2	1.099169	210.2	1.034883	210.2	1.080492	210.2	1.077679	210.2	1.026251	210.2	1.105331	210.2	1.115022	210.2	-0.1436231	210.2	-0.1244897	210.2	-0.1883214	210.2	-0.1315838	210.2	-0.1055013	210.2	-0.1426548	210.2	-0.1014169	210.2	-0.09207171	210.2	-0.105918
210.4	1.10009	210.4	1.037207	210.4	1.079851	210.4	1.082303	210.4	1.023285	210.4	1.099361	210.4	1.116276	210.4	-0.1429085	210.4	-0.1286184	210.4	-0.188595	210.4	-0.1235692	210.4	-0.1088814	210.4	-0.1445136	210.4	-0.1019408	210.4	-0.09337998	210.4	-0.09656647
210.6	1.098296	210.6	1.041695	210.6	1.078185	210.6	1.08292	210.6	1.02228	210.6	1.101602	210.6	1.117332	210.6	-0.1433203	210.6	-0.1288364	210.6	-0.1856559	210.6	-0.1296126	210.6	-0.1010228	210.6	-0.1484742	210.6	-0.09940217	210.6	-0.09091112	210.6	-0.1084903
210.8	1.100986	210.8	1.043326	210.8	1.08025	210.8	1.07985	210.8	1.026971	210.8	1.100088	210.8	1.118762	210.8	-0.1442318	210.8	-0.1250778	210.8	-0.1844347	210.8	-0.1215486	210.8	-0.1049545	210.8	-0.1413026	210.8	-0.1040038	210.8	-0.08845349	210.8	-0.1032715
211	1.097233	211	1.04062	211	1.076826	211	1.083069	211	1.023948	211	1.100303	211	1.114038	211	-0.1368891	211	-0.1251323	211	-0.1804311	211	-0.1277067	211	-0.1023585	211	-0.1440858	211	-0.1042347	211	-0.09562065	211	-0.1050826
211.2	1.098178	211.2	1.040759	211.2	1.083311	211.2	1.082651	211.2	1.025917	211.2	1.101552	211.2	1.117418	211.2	-0.1388179	211.2	-0.1296959	211.2	-0.184511	211.2	-0.1287262	211.2	-0.1073248	211.2	-0.1452832	211.2	-0.1024851	211.2	-0.09625668	211.2	-0.09819889
211.4	1.104648	211.4	1.044464	211.4	1.081811	211.4	1.085272	211.4	1.026625	211.4	1.099285	211.4	1.118212	211.4	-0.1438166	211.4	-0.1250491	211.4	-0.1797197	211.4	-0.1290768	211.4	-0.1004612	211.4	-0.1449956	211.4	-0.1030532	211.4	-0.09665155	211.4	-0.09999982
211.6	1.102498	211.6	1.045129	211.6	1.082527	211.6	1.080116	211.6	1.025191	211.6	1.099702	211.6	1.125218	211.6	-0.142987	211.6	-0.1265325	211.6	-0.1883954	211.6	-0.1275682	211.6	-0.1052158	211.6	-0.1412997	211.6	-0.1044734	211.6	-0.09238038	211.6	-0.101131
211.8	1.104936	211.8	1.043461	211.8	1.081124	211.8	1.083493	211.8	1.0252	211.8	1.106583	211.8	1.12166	211.8	-0.1434171	211.8	-0.1231297	211.8	-0.186509	211.8	-0.1305403	211.8	-0.1071709	211.8	-0.138241	211.8	-0.1005345	211.8	-0.09263965	211.8	-0.09758322
212	1.105673	212	1.043758	212	1.083194	212	1.082388	212	1.019733	212	1.103014	212	1.121679	212	-0.1440064	212	-0.1241641	212	-0.1795027	212	-0.1265365	212	-0.1068192	212	-0.1411142	212	-0.1004416	212	-0.09737709	212	-0.09880703
212.2	1.105808	212.2	1.04873	212.2	1.084328	212.2	1.085167	212.2	1.026664	212.2	1.097984	212.2	1.120504	212.2	-0.1448861	212.2	-0.1244198	212.2	-0.1854109	212.2	-0.1321731	212.2	-0.1042488	212.2	-0.1431877	212.2	-0.1023538	212.2	-0.09292959	212.2	-0.1046011
212.4	1.104924	212.4	1.047388	212.4	1.082961	212.4	1.080015	212.4	1.029062	212.4	1.103677	212.4	1.121593	212.4	-0.1384918	212.4	-0.1206133	212.4	-0.1871925	212.4	-0.1299855	212.4	-0.1004839	212.4	-0.1424673	212.4	-0.1011457	212.4	-0.09194139	212.4	-0.100827
212.6	1.107042	212.6	1.047989	212.6	1.086166	212.6	1.085183	212.6	1.026082	212.6	1.098851	212.6	1.123124	212.6	-0.139032	212.6	-0.1237541	212.6	-0.1819417	212.6	-0.1265656	212.6	-0.1072299	212.6	-0.1397834	212.6	-0.1018431	212.6	-0.09235331	212.6	-0.09771829
212.8	1.11061	212.8	1.043097	212.8	1.082141	212.8	1.086594	212.8	1.022298	212.8	1.107178	212.8	1.116284	212.8	-0.1404024	212.8	-0.1198134	212.8	-0.1809137	212.8	-0.1247026	212.8	-0.1046033	212.8	-0.147819	212.8	-0.09981983	212.8	-0.09130398	212.8	-0.09755828
213	1.106572	213	1.045875	213	1.086418	213	1.084267	213	1.024533	213	1.102284	213	1.121864	213	-0.1415477	213	-0.1222217	213	-0.1843286	213	-0.1247529	213	-0.1020327	213	-0.1432209	213	-0.1030107	213	-0.09280744	213	-0.09604636
213.2	1.108706	213.2	1.045147	213.2	1.084421	213.2	1.084284	213.2	1.027861	213.2	1.10205	213.2	1.121322	213.2	-0.1443132	213.2	-0.1260298	213.2	-0.1807217	213.2	-0.1279375	213.2	-0.1043278	213.2	-0.141072	213.2	-0.09693438	213.2	-0.0943267	213.2	-0.1022028
213.4	1.111115	213.4	1.045225	213.4	1.090733	213.4	1.086654	213.4	1.023771	213.4	1.104821	213.4	1.119887	213.4	-0.1365847	213.4	-0.1223966	213.4	-0.180386	213.4	-0.1272807	213.4	-0.1031361	213.4	-0.1405515	213.4	-0.104245	213.4	-0.08807307	213.4	-0.1006923
213.6	1.110615	213.6	1.052295	213.6	1.086444	213.6	1.084526	213.6	1.022868	213.6	1.101765	213.6	1.122205	213.6	-0.1431486	213.6	-0.1260228	213.6	-0.1856735	213.6	-0.1238867	213.6	-0.1049541	213.6	-0.1431805	213.6	-0.1020375	213.6	-0.08867641	213.6	-0.0975879
213.8	1.112729	213.8	1.05037	213.8	1.088638	213.8	1.088424	213.8	1.025393	213.8	1.104049	213.8	1.121495	213.8	-0.1400496	213.8	-0.1225701	213.8	-0.1803841	213.8	-0.1257045	213.8	-0.1018198	213.8	-0.1407596	213.8	-0.1003877	213.8	-0.09378535	213.8	-0.09921646
214	1.11634	214	1.052263	214	1.084744	214	1.083977	214	1.026438	214	1.100032	214	1.121361	214	-0.1410579	214	-0.1209507	214	-0.1789795	214	-0.1255947	214	-0.1030129	214	-0.1398794	214	-0.09973147	214	-0.09092776	214	-0.1001828
214.2	1.112307	214.2	1.047934	214.2	1.089652	214.2	1.087114	214.2	1.022944	214.2	1.107871	214.2	1.123641	214.2	-0.1446412	214.2	-0.1227401	214.2	-0.1786531	214.2	-0.1264842	214.2	-0.1002384	214.2	-0.1420737	214.2	-0.1005454	214.2	-0.08644111	214.2	-0.09973682
214.4	1.115609	214.4	1.048331	214.4	1.088383	214.4	1.08748	214.4	1.023626	214.4	1.103881	214.4	1.120373	214.4	-0.1411195	214.4	-0.1227429	214.4	-0.1812619	214.4	-0.1223348	214.4	-0.09985144	214.4	-0.1387073	214.4	-0.1029008	214.4	-0.08872452	214.4	-0.1002221
214.6	1.10945	214.6	1.053697	214.6	1.086948	214.6	1.082415	214.6	1.027744	214.6	1.104394	214.6	1.118791	214.6	-0.1391283	214.6	-0.1229333	214.6	-0.1785401	214.6	-0.1285356	214.6	-0.103437	214.6	-0.1421674	214.6	-0.09873527	214.6	-0.08945933	214.6	-0.0975645
214.8	1.113447	214.8	1.052017	214.8	1.088032	214.8	1.087043	214.8	1.028381	214.8	1.103414	214.8	1.119292	214.8	-0.1361255	214.8	-0.1254374	214.8	-0.1787552	214.8	-0.1262347	214.8	-0.1038917	214.8	-0.1385337	214.8	-0.1031954	214.8	-0.08845238	214.8	-0.1019413
215	1.116869	215	1.047675	215	1.090386	215	1.080416	215	1.031097	215	1.104708	215	1.118489	215	-0.1402382	215	-0.1227902	215	-0.1763508	215	-0.1252701	215	-0.1024774	215	-0.140899	215	-0.0967645	215	-0.09050199	215	-0.1017878
215.2	1.115246	215.2	1.055501	215.2	1.088316	215.2	1.086341	215.2	1.029506	215.2	1.107342	215.2	1.122249	215.2	-0.1394127	215.2	-0.1238745	215.2	-0.1819043	215.2	-0.1237553	215.2	-0.09931917	215.2	-0.1353941	215.2	-0.1017871	215.2	-0.08930544	215.2	-0.09620813
215.4	1.117117	215.4	1.050138	215.4	1.086506	215.4	1.083801	215.4	1.026137	215.4	1.10418	215.4	1.117613	215.4	-0.1413243	215.4	-0.1257543	215.4	-0.1761018	215.4	-0.1276571	215.4	-0.09931482	215.4	-0.1392454	215.4	-0.1009752	215.4	-0.08718694	215.4	-0.09921575
215.6	1.121104	215.6	1.051826	215.6	1.092084	215.6	1.088428	215.6	1.02338	215.6	1.100759	215.6	1.123647	215.6	-0.1392534	215.6	-0.1243435	215.6	-0.1810925	215.6	-0.1231327	215.6	-0.09944307	215.6	-0.144791	215.6	-0.101442	215.6	-0.09034802	215.6	-0.09659968
215.8	1.12457	215.8	1.047233	215.8	1.088231	215.8	1.08787	215.8	1.026972	215.8	1.104772	215.8	1.123233	215.8	-0.1381761	215.8	-0.1219536	215.8	-0.1794709	215.8	-0.1296178	215.8	-0.1030252	215.8	-0.1381972	215.8	-0.09891321	215.8	-0.08771047	215.8	-0.1018579
216	1.123531	216	1.056396	216	1.09097	216	1.084756	216	1.026182	216	1.106935	216	1.122438	216	-0.1413358	216	-0.1244296	216	-0.1836841	216	-0.1234859	216	-0.09894417	216	-0.1372524	216	-0.1007123	216	-0.09588766	216	-0.09778713
216.2	1.124123	216.2	1.052821	216.2	1.08968	216.2	1.084548	216.2	1.024585	216.2	1.104858	216.2	1.121505	216.2	-0.1376025	216.2	-0.1160451	216.2	-0.1814135	216.2	-0.1236734	216.2	-0.1014515	216.2	-0.1400381	216.2	-0.09962072	216.2	-0.08942027	216.2	-0.09492674
216.4	1.119848	216.4	1.055226	216.4	1.091899	216.4	1.087353	216.4	1.030402	216.4	1.110841	216.4	1.119914	216.4	-0.139392	216.4	-0.1197621	216.4	-0.1814765	216.4	-0.1209998	216.4	-0.1026625	216.4	-0.1410039	216.4	-0.0984943	216.4	-0.09053173	216.4	-0.09884069
216.6	1.124931	216.6	1.05356	216.6	1.093239	216.6	1.09115	216.6	1.029264	216.6	1.106265	216.6	1.122925	216.6	-0.1405011	216.6	-0.1198209	216.6	-0.1793669	216.6	-0.1238584	216.6	-0.09962897	216.6	-0.137895	216.6	-0.0957158	216.6	-0.08923107	216.6	-0.09302413
216.8	1.122714	216.8	1.060511	216.8	1.091867	216.8	1.089006	216.8	1.028515	216.8	1.10591	216.8	1.121011	216.8	-0.1390373	216.8	-0.1192663	216.8	-0.1819022	216.8	-0.1255209	216.8	-0.09993656	216.8	-0.140465	216.8	-0.09626251	216.8	-0.08807998	216.8	-0.09843282
217	1.126733	217	1.059514	217	1.095305	217	1.089391	217	1.026413	217	1.101562	217	1.12353	217	-0.1431424	217	-0.1239198	217	-0.1779822	217	-0.1232835	217	-0.1005528	217	-0.140622	217	-0.1005313	217	-0.0887428	217	-0.09702836
217.2	1.127069	217.2	1.056448	217.2	1.090616	217.2	1.089257	217.2	1.024735	217.2	1.108021	217.2	1.123433	217.2	-0.1422395	217.2	-0.1190596	217.2	-0.1787388	217.2	-0.1217235	217.2	-0.1015043	217.2	-0.142734	217.2	-0.1034015	217.2	-0.08660685	217.2	-0.09668546
217.4	1.121921	217.4	1.058882	217.4	1.089788	217.4	1.090413	217.4	1.030377	217.4	1.11045	217.4	1.118073	217.4	-0.1389383	217.4	-0.1214799	217.4	-0.1803243	217.4	-0.1224932	217.4	-0.1010282	217.4	-0.138594	217.4	-0.096679	217.4	-0.08838812	217.4	-0.09932164
217.6	1.122516	217.6	1.059263	217.6	1.091553	217.6	1.089323	217.6	1.028769	217.6	1.107159	217.6	1.127831	217.6	-0.1333022	217.6	-0.1235932	217.6	-0.17736	217.6	-0.1229524	217.6	-0.1010324	217.6	-0.1375049	217.6	-0.09802576	217.6	-0.09073542	217.6	-0.09941708
217.8	1.126284	217.8	1.052304	217.8	1.092623	217.8	1.089646	217.8	1.028171	217.8	1.107729	217.8	1.120213	217.8	-0.1385918	217.8	-0.1205585	217.8	-0.1765756	217.8	-0.1226884	217.8	-0.09386701	217.8	-0.1343508	217.8	-0.100131	217.8	-0.08578826	217.8	-0.0957927
218	1.124415	218	1.060645	218	1.088343	218	1.091686	218	1.030141	218	1.109939	218	1.123959	218	-0.1367845	218	-0.1189761	218	-0.1823494	218	-0.125152	218	-0.0992697	218	-0.1375809	218	-0.0955064	218	-0.08464547	218	-0.09206864
218.2	1.123211	218.2	1.061031	218.2	1.090848	218.2	1.083857	218.2	1.033062	218.2	1.106151	218.2	1.122283	218.2	-0.1410568	218.2	-0.1151447	218.2	-0.1774885	218.2	-0.1197803	218.2	-0.09543667	218.2	-0.1406532	218.2	-0.1006258	218.2	-0.08624563	218.2	-0.09719553
218.4	1.130378	218.4	1.055262	218.4	1.091943	218.4	1.091021	218.4	1.033327	218.4	1.103714	218.4	1.12004	218.4	-0.1396009	218.4	-0.1189014	218.4	-0.1805743	218.4	-0.1208115	218.4	-0.09957612	218.4	-0.1342174	218.4	-0.09619958	218.4	-0.08759349	218.4	-0.09769893
218.6	1.130849	218.6	1.062075	218.6	1.09343	218.6	1.092418	218.6	1.026485	218.6	1.110374	218.6	1.121282	218.6	-0.1382971	218.6	-0.1178942	218.6	-0.1776302	218.6	-0.1228666	218.6	-0.1001026	218.6	-0.1335306	218.6	-0.09371158	218.6	-0.08804585	218.6	-0.09571876
218.8	1.129786	218.8	1.062267	218.8	1.092778	218.8	1.091765	218.8	1.023659	218.8	1.105741	218.8	1.121495	218.8	-0.1337687	218.8	-0.1217961	218.8	-0.1752009	218.8	-0.1238926	218.8	-0.09417928	218.8	-0.1353724	218.8	-0.09578947	218.8	-0.08656	218.8	-0.09846434
219	1.12876	219	1.060861	219	1.098464	219	1.091913	219	1.026748	219	1.107392	219	1.123272	219	-0.1378408	219	-0.1188156	219	-0.1811557	219	-0.1201288	219	-0.09586243	219	-0.1392351	219	-0.09520856	219	-0.08819003	219	-0.09592777
219.2	1.126457	219.2	1.064937	219.2	1.102011	219.2	1.087335	219.2	1.027363	219.2	1.109597	219.2	1.121915	219.2	-0.1361216	219.2	-0.1141321	219.2	-0.1809444	219.2	-0.1227135	219.2	-0.1012725	219.2	-0.1395883	219.2	-0.1000143	219.2	-0.08862904	219.2	-0.09645864
219.4	1.128017	219.4	1.063293	219.4	1.097308	219.4	1.092157	219.4	1.031088	219.4	1.111748	219.4	1.124998	219.4	-0.1392876	219.4	-0.1149042	219.4	-0.1792295	219.4	-0.1247494	219.4	-0.101069	219.4	-0.1374169	219.4	-0.09634417	219.4	-0.08586188	219.4	-0.0894994
219.6	1.13347	219.6	1.062487	219.6	1.099852	219.6	1.092045	219.6	1.034703	219.6	1.10726	219.6	1.128349	219.6	-0.1422826	219.6	-0.117762	219.6	-0.1796025	219.6	-0.1230263	219.6	-0.09893189	219.6	-0.1352817	219.6	-0.09792672	219.6	-0.08767896	219.6	-0.09613657
219.8	1.132822	219.8	1.061064	219.8	1.094061	219.8	1.094637	219.8	1.029613	219.8	1.10864	219.8	1.120854	219.8	-0.1392589	219.8	-0.1187687	219.8	-0.1787364	219.8	-0.1194519	219.8	-0.09601662	219.8	-0.1400523	219.8	-0.09488394	219.8	-0.08859316	219.8	-0.0951953
220	1.133471	220	1.057396	220	1.098507	220	1.09733	220	1.025333	220	1.11006	220	1.128901	220	-0.1350764	220	-0.1203301	220	-0.1770009	220	-0.1222557	220	-0.1005404	220	-0.1379306	220	-0.09590586	220	-0.08659318	220	-0.09545333
220.2	1.134565	220.2	1.067458	220.2	1.098477	220.2	1.090796	220.2	1.029564	220.2	1.106712	220.2	1.12438	220.2	-0.1388326	220.2	-0.1143649	220.2	-0.1803285	220.2	-0.1250307	220.2	-0.09539982	220.2	-0.1376947	220.2	-0.09725129	220.2	-0.08610418	220.2	-0.09370285
220.4	1.135434	220.4	1.057982	220.4	1.095943	220.4	1.091602	220.4	1.023031	220.4	1.106854	220.4	1.127152	220.4	-0.1403644	220.4	-0.1156043	220.4	-0.1761635	220.4	-0.1241561	220.4	-0.09953707	220.4	-0.1358032	220.4	-0.09594101	220.4	-0.08467291	220.4	-0.09271862
220.6	1.133406	220.6	1.062637	220.6	1.097868	220.6	1.08826	220.6	1.030278	220.6	1.106979	220.6	1.122034	220.6	-0.1343489	220.6	-0.1184173	220.6	-0.1759137	220.6	-0.1200363	220.6	-0.09434265	220.6	-0.1385088	220.6	-0.09669246	220.6	-0.08796875	220.6	-0.09307667
220.8	1.136206	220.8	1.065682	220.8	1.096794	220.8	1.091397	220.8	1.029249	220.8	1.109714	220.8	1.126404	220.8	-0.1408606	220.8	-0.1184658	220.8	-0.1771785	220.8	-0.1185954	220.8	-0.09744778	220.8	-0.1356648	220.8	-0.09743059	220.8	-0.08585145	220.8	-0.09356688
221	1.13822	221	1.062843	221	1.099537	221	1.094998	221	1.029004	221	1.110568	221	1.123702	221	-0.1376353	221	-0.12064	221	-0.1762958	221	-0.1184509	221	-0.09283754	221	-0.1306138	221	-0.09300487	221	-0.0908184	221	-0.09336919
221.2	1.137416	221.2	1.06653	221.2	1.102434	221.2	1.097816	221.2	1.02945	221.2	1.108921	221.2	1.130472	221.2	-0.1363467	221.2	-0.1192965	221.2	-0.1778833	221.2	-0.1189677	221.2	-0.09706871	221.2	-0.1366363	221.2	-0.09335754	221.2	-0.08895432	221.2	-0.09773304
221.4	1.135444	221.4	1.067295	221.4	1.097071	221.4	1.100993	221.4	1.033483	221.4	1.107809	221.4	1.130623	221.4	-0.134267	221.4	-0.1164676	221.4	-0.1759716	221.4	-0.1147661	221.4	-0.09537659	221.4	-0.1376937	221.4	-0.09173303	221.4	-0.08401897	221.4	-0.09472885
221.6	1.137119	221.6	1.06251	221.6	1.096754	221.6	1.096327	221.6	1.025442	221.6	1.10948	221.6	1.127329	221.6	-0.134813	221.6	-0.1132601	221.6	-0.1758738	221.6	-0.1179239	221.6	-0.09711659	221.6	-0.1374257	221.6	-0.09203292	221.6	-0.08842392	221.6	-0.09338024
221.8	1.140435	221.8	1.064439	221.8	1.099303	221.8	1.095217	221.8	1.028828	221.8	1.110518	221.8	1.124769	221.8	-0.1352233	221.8	-0.1228622	221.8	-0.1755499	221.8	-0.1212629	221.8	-0.09573846	221.8	-0.1354951	221.8	-0.09642405	221.8	-0.08494645	221.8	-0.09227815
222	1.137872	222	1.065307	222	1.097051	222	1.099882	222	1.029402	222	1.111576	222	1.123361	222	-0.1338465	222	-0.117088	222	-0.17754	222	-0.1177821	222	-0.09506531	222	-0.1389041	222	-0.0948206	222	-0.086828	222	-0.09206765
222.2	1.139888	222.2	1.066453	222.2	1.097881	222.2	1.098115	222.2	1.025747	222.2	1.110544	222.2	1.124854	222.2	-0.132458	222.2	-0.1142751	222.2	-0.1779747	222.2	-0.1201049	222.2	-0.09289315	222.2	-0.1330126	222.2	-0.09699003	222.2	-0.08457791	222.2	-0.09212177
222.4	1.139994	222.4	1.06656	222.4	1.095299	222.4	1.094993	222.4	1.026154	222.4	1.110254	222.4	1.126204	222.4	-0.1374976	222.4	-0.1181949	222.4	-0.172599	222.4	-0.1185519	222.4	-0.09569389	222.4	-0.1371074	222.4	-0.0900711	222.4	-0.08036141	222.4	-0.09912539
222.6	1.14097	222.6	1.068592	222.6	1.096801	222.6	1.094913	222.6	1.028791	222.6	1.107899	222.6	1.128658	222.6	-0.1358084	222.6	-0.1189144	222.6	-0.1762662	222.6	-0.1227956	222.6	-0.09447009	222.6	-0.1334433	222.6	-0.09428848	222.6	-0.08898152	222.6	-0.08984852
222.8	1.145144	222.8	1.066326	222.8	1.100824	222.8	1.09408	222.8	1.02886	222.8	1.107653	222.8	1.122503	222.8	-0.1395396	222.8	-0.1134167	222.8	-0.1736733	222.8	-0.1218729	222.8	-0.09281559	222.8	-0.1371859	222.8	-0.09825449	222.8	-0.07974587	222.8	-0.08994482
223	1.141129	223	1.070329	223	1.103273	223	1.097386	223	1.034518	223	1.115079	223	1.124227	223	-0.1327585	223	-0.1160144	223	-0.1750629	223	-0.1237654	223	-0.09396613	223	-0.1372238	223	-0.09093961	223	-0.08544695	223	-0.09472854
223.2	1.14054	223.2	1.071141	223.2	1.102951	223.2	1.097348	223.2	1.032636	223.2	1.114663	223.2	1.127508	223.2	-0.1283019	223.2	-0.1144522	223.2	-0.1759693	223.2	-0.1205271	223.2	-0.09354088	223.2	-0.1325377	223.2	-0.09208816	223.2	-0.08475998	223.2	-0.09373
223.4	1.143645	223.4	1.06933	223.4	1.102748	223.4	1.095728	223.4	1.032222	223.4	1.112035	223.4	1.129619	223.4	-0.1357748	223.4	-0.1159498	223.4	-0.1764961	223.4	-0.1216731	223.4	-0.09568021	223.4	-0.1342532	223.4	-0.09648312	223.4	-0.08342919	223.4	-0.09386677
223.6	1.144861	223.6	1.068729	223.6	1.101369	223.6	1.103428	223.6	1.03217	223.6	1.111025	223.6	1.123387	223.6	-0.1373111	223.6	-0.1162904	223.6	-0.1719494	223.6	-0.1197918	223.6	-0.08899422	223.6	-0.1342428	223.6	-0.09464029	223.6	-0.08453552	223.6	-0.09337135
223.8	1.144688	223.8	1.069573	223.8	1.104553	223.8	1.093546	223.8	1.029947	223.8	1.112996	223.8	1.125594	223.8	-0.132091	223.8	-0.1167201	223.8	-0.1688759	223.8	-0.1149529	223.8	-0.09180082	223.8	-0.1375308	223.8	-0.09315025	223.8	-0.08203045	223.8	-0.09362938
224	1.142828	224	1.07127	224	1.102166	224	1.098748	224	1.030552	224	1.111945	224	1.129049	224	-0.1341997	224	-0.1172555	224	-0.174408	224	-0.1170913	224	-0.09407189	224	-0.1325874	224	-0.09175747	224	-0.08982401	224	-0.08935662
224.2	1.143208	224.2	1.070099	224.2	1.105623	224.2	1.098828	224.2	1.032532	224.2	1.110674	224.2	1.130275	224.2	-0.1324582	224.2	-0.1133072	224.2	-0.1732739	224.2	-0.1170621	224.2	-0.09074163	224.2	-0.1296969	224.2	-0.09543564	224.2	-0.08541316	224.2	-0.09151988
224.4	1.144783	224.4	1.074739	224.4	1.103357	224.4	1.097226	224.4	1.034798	224.4	1.110123	224.4	1.12761	224.4	-0.1321187	224.4	-0.1133776	224.4	-0.1726233	224.4	-0.1191859	224.4	-0.0860796	224.4	-0.1374319	224.4	-0.09475432	224.4	-0.08627956	224.4	-0.0902542
224.6	1.145282	224.6	1.073138	224.6	1.102366	224.6	1.097574	224.6	1.032376	224.6	1.109841	224.6	1.12137	224.6	-0.1352111	224.6	-0.1161962	224.6	-0.1761868	224.6	-0.1161606	224.6	-0.09417746	224.6	-0.1329963	224.6	-0.09492653	224.6	-0.08142892	224.6	-0.09404883
224.8	1.149883	224.8	1.074248	224.8	1.101594	224.8	1.097029	224.8	1.035916	224.8	1.110903	224.8	1.125039	224.8	-0.1357681	224.8	-0.1156756	224.8	-0.170866	224.8	-0.1182844	224.8	-0.09169824	224.8	-0.1311528	224.8	-0.08823971	224.8	-0.08501241	224.8	-0.0905313
225	1.151782	225	1.073107	225	1.098958	225	1.098785	225	1.035193	225	1.113839	225	1.122333	225	-0.1320791	225	-0.11954	225	-0.1763678	225	-0.1173557	225	-0.09256747	225	-0.1385387	225	-0.09369293	225	-0.08760572	225	-0.09225355
225.2	1.145478	225.2	1.07066	225.2	1.098003	225.2	1.100391	225.2	1.033987	225.2	1.11398	225.2	1.123384	225.2	-0.1329912	225.2	-0.1127454	225.2	-0.1732377	225.2	-0.1158772	225.2	-0.09132326	225.2	-0.1312014	225.2	-0.09533274	225.2	-0.08470159	225.2	-0.08878104
225.4	1.146077	225.4	1.075955	225.4	1.101333	225.4	1.100284	225.4	1.03417	225.4	1.115139	225.4	1.1296	225.4	-0.136278	225.4	-0.1153524	225.4	-0.17487	225.4	-0.1165659	225.4	-0.09214602	225.4	-0.1328029	225.4	-0.09010011	225.4	-0.08304626	225.4	-0.09364793
225.6	1.149573	225.6	1.075112	225.6	1.100265	225.6	1.102604	225.6	1.032928	225.6	1.114132	225.6	1.129508	225.6	-0.1339924	225.6	-0.1128514	225.6	-0.1755439	225.6	-0.1141869	225.6	-0.09272792	225.6	-0.1374179	225.6	-0.09101134	225.6	-0.08461747	225.6	-0.09209373
225.8	1.149236	225.8	1.070773	225.8	1.101302	225.8	1.095784	225.8	1.037486	225.8	1.114287	225.8	1.128043	225.8	-0.1378997	225.8	-0.1153275	225.8	-0.1669881	225.8	-0.1198118	225.8	-0.09169215	225.8	-0.1363442	225.8	-0.09179013	225.8	-0.08557356	225.8	-0.09580536
226	1.152859	226	1.077045	226	1.10613	226	1.098751	226	1.036569	226	1.111781	226	1.126408	226	-0.136662	226	-0.1150172	226	-0.1712884	226	-0.1155164	226	-0.0926004	226	-0.1323003	226	-0.09306743	226	-0.08365823	226	-0.09207749
226.2	1.151872	226.2	1.070951	226.2	1.105377	226.2	1.10007	226.2	1.036631	226.2	1.118426	226.2	1.131132	226.2	-0.1337561	226.2	-0.1107882	226.2	-0.1746004	226.2	-0.1155759	226.2	-0.09732211	226.2	-0.1333538	226.2	-0.09451068	226.2	-0.08811536	226.2	-0.08735504
226.4	1.150279	226.4	1.07781	226.4	1.104563	226.4	1.099059	226.4	1.039127	226.4	1.112606	226.4	1.132129	226.4	-0.1365752	226.4	-0.1167205	226.4	-0.1749344	226.4	-0.1165645	226.4	-0.0944517	226.4	-0.1320082	226.4	-0.09040464	226.4	-0.08473518	226.4	-0.09069454
226.6	1.153166	226.6	1.077865	226.6	1.10734	226.6	1.101546	226.6	1.032117	226.6	1.111416	226.6	1.125871	226.6	-0.128182	226.6	-0.1163621	226.6	-0.1734622	226.6	-0.1153523	226.6	-0.08969352	226.6	-0.1317954	226.6	-0.09123766	226.6	-0.088756	226.6	-0.09390531
226.8	1.150252	226.8	1.076087	226.8	1.102404	226.8	1.098371	226.8	1.03126	226.8	1.114929	226.8	1.127172	226.8	-0.1314537	226.8	-0.1119894	226.8	-0.1713421	226.8	-0.1158648	226.8	-0.09163391	226.8	-0.1305949	226.8	-0.08810234	226.8	-0.08266016	226.8	-0.09041897
227	1.155222	227	1.073336	227	1.109056	227	1.09848	227	1.03408	227	1.111751	227	1.123934	227	-0.1290967	227	-0.1155514	227	-0.1692161	227	-0.1127549	227	-0.09411246	227	-0.1328609	227	-0.08861508	227	-0.08126923	227	-0.09206931
227.2	1.152097	227.2	1.076827	227.2	1.102649	227.2	1.103914	227.2	1.03564	227.2	1.115186	227.2	1.125768	227.2	-0.1302082	227.2	-0.113819	227.2	-0.1700614	227.2	-0.1123265	227.2	-0.09474596	227.2	-0.134693	227.2	-0.08935378	227.2	-0.08335416	227.2	-0.08781385
227.4	1.153941	227.4	1.079758	227.4	1.107873	227.4	1.097151	227.4	1.031726	227.4	1.117154	227.4	1.130041	227.4	-0.1324133	227.4	-0.109242	227.4	-0.169246	227.4	-0.1140415	227.4	-0.0926211	227.4	-0.1354445	227.4	-0.09266439	227.4	-0.08680918	227.4	-0.08523665
227.6	1.154566	227.6	1.079987	227.6	1.110138	227.6	1.099677	227.6	1.033526	227.6	1.11638	227.6	1.12933	227.6	-0.1312642	227.6	-0.1193462	227.6	-0.1693065	227.6	-0.115914	227.6	-0.08912911	227.6	-0.1338847	227.6	-0.09414858	227.6	-0.08402009	227.6	-0.08613886
227.8	1.154102	227.8	1.076424	227.8	1.103938	227.8	1.100513	227.8	1.034443	227.8	1.117226	227.8	1.130699	227.8	-0.1275332	227.8	-0.1143886	227.8	-0.1676159	227.8	-0.114041	227.8	-0.08602359	227.8	-0.1357465	227.8	-0.08899696	227.8	-0.08337671	227.8	-0.08982167
228	1.158053	228	1.078642	228	1.108891	228	1.100834	228	1.032698	228	1.117241	228	1.13278	228	-0.1301203	228	-0.1111133	228	-0.1707152	228	-0.1149327	228	-0.09411532	228	-0.1352857	228	-0.09197909	228	-0.08101732	228	-0.08754275
228.2	1.158172	228.2	1.07696	228.2	1.108349	228.2	1.105946	228.2	1.037614	228.2	1.116198	228.2	1.124628	228.2	-0.132821	228.2	-0.1059908	228.2	-0.1716934	228.2	-0.1149924	228.2	-0.09109432	228.2	-0.1301709	228.2	-0.08804257	228.2	-0.08073356	228.2	-0.0857044
228.4	1.158788	228.4	1.080038	228.4	1.111629	228.4	1.105549	228.4	1.032692	228.4	1.115132	228.4	1.130929	228.4	-0.1324714	228.4	-0.1108285	228.4	-0.1703129	228.4	-0.1164057	228.4	-0.08970697	228.4	-0.1303695	228.4	-0.0878007	228.4	-0.08107641	228.4	-0.08821277
228.6	1.159837	228.6	1.082827	228.6	1.109194	228.6	1.101301	228.6	1.036868	228.6	1.117846	228.6	1.130206	228.6	-0.1338752	228.6	-0.1104251	228.6	-0.1697857	228.6	-0.1129153	228.6	-0.09032587	228.6	-0.1311373	228.6	-0.08727867	228.6	-0.08515713	228.6	-0.09048769
228.8	1.159818	228.8	1.079519	228.8	1.10776	228.8	1.105498	228.8	1.034249	228.8	1.115432	228.8	1.130511	228.8	-0.1326841	228.8	-0.1149942	228.8	-0.1729905	228.8	-0.1141526	228.8	-0.08730042	228.8	-0.1310337	228.8	-0.08822389	228.8	-0.08397694	228.8	-0.09015288
229	1.155365	229	1.085445	229	1.104236	229	1.103564	229	1.037427	229	1.115462	229	1.132519	229	-0.1315133	229	-0.108723	229	-0.1672653	229	-0.1128624	229	-0.08951118	229	-0.1332428	229	-0.09207175	229	-0.08437391	229	-0.0835323
229.2	1.155859	229.2	1.080531	229.2	1.108934	229.2	1.101737	229.2	1.038576	229.2	1.117282	229.2	1.137164	229.2	-0.1315942	229.2	-0.1093902	229.2	-0.1694666	229.2	-0.1137228	229.2	-0.09202724	229.2	-0.1333081	229.2	-0.09086233	229.2	-0.08115253	229.2	-0.08962774
229.4	1.163643	229.4	1.084337	229.4	1.109639	229.4	1.102853	229.4	1.037806	229.4	1.114285	229.4	1.127709	229.4	-0.1312751	229.4	-0.1128238	229.4	-0.1703412	229.4	-0.1139898	229.4	-0.09195685	229.4	-0.1348827	229.4	-0.08657613	229.4	-0.08150551	229.4	-0.08862492
229.6	1.159054	229.6	1.083499	229.6	1.107658	229.6	1.103323	229.6	1.035072	229.6	1.117387	229.6	1.131082	229.6	-0.1320012	229.6	-0.1140548	229.6	-0.1711018	229.6	-0.1154701	229.6	-0.08728686	229.6	-0.133642	229.6	-0.08844532	229.6	-0.0827483	229.6	-0.0856858
229.8	1.160446	229.8	1.084351	229.8	1.107007	229.8	1.105003	229.8	1.035434	229.8	1.115757	229.8	1.130113	229.8	-0.1301526	229.8	-0.1102857	229.8	-0.1689667	229.8	-0.1135024	229.8	-0.09219694	229.8	-0.1292115	229.8	-0.08999407	229.8	-0.0803018	229.8	-0.08776858
230	1.163374	230	1.081511	230	1.110104	230	1.103603	230	1.036593	230	1.119459	230	1.131423	230	-0.132267	230	-0.1091893	230	-0.17257	230	-0.1136818	230	-0.08527794	230	-0.1283898	230	-0.0886213	230	-0.07972351	230	-0.09021678
230.2	1.160079	230.2	1.086192	230.2	1.111686	230.2	1.103956	230.2	1.036471	230.2	1.118754	230.2	1.132132	230.2	-0.1278808	230.2	-0.1089371	230.2	-0.1689223	230.2	-0.1131221	230.2	-0.0888373	230.2	-0.1301975	230.2	-0.08652243	230.2	-0.07972624	230.2	-0.08746989
230.4	1.164075	230.4	1.085325	230.4	1.111163	230.4	1.104332	230.4	1.033632	230.4	1.117537	230.4	1.129595	230.4	-0.1323566	230.4	-0.1168013	230.4	-0.1670521	230.4	-0.1126975	230.4	-0.09063905	230.4	-0.134199	230.4	-0.09003164	230.4	-0.07946732	230.4	-0.08942346
230.6	1.165532	230.6	1.082858	230.6	1.111012	230.6	1.101012	230.6	1.043113	230.6	1.11557	230.6	1.129218	230.6	-0.1333696	230.6	-0.1132404	230.6	-0.1701981	230.6	-0.1110857	230.6	-0.0875197	230.6	-0.131767	230.6	-0.08765107	230.6	-0.08427491	230.6	-0.08701087
230.8	1.163744	230.8	1.082934	230.8	1.114375	230.8	1.105566	230.8	1.040614	230.8	1.11997	230.8	1.128488	230.8	-0.1276658	230.8	-0.1110557	230.8	-0.170032	230.8	-0.1129759	230.8	-0.08694036	230.8	-0.1281809	230.8	-0.08998018	230.8	-0.0788765	230.8	-0.09083071
231	1.158629	231	1.083819	231	1.113669	231	1.104754	231	1.041087	231	1.114914	231	1.132612	231	-0.1307298	231	-0.113525	231	-0.1661254	231	-0.1107754	231	-0.08940383	231	-0.1336741	231	-0.09173671	231	-0.08314609	231	-0.09012806
231.2	1.164178	231.2	1.089511	231.2	1.11672	231.2	1.104659	231.2	1.037625	231.2	1.117737	231.2	1.13289	231.2	-0.1316885	231.2	-0.1134281	231.2	-0.1687128	231.2	-0.117828	231.2	-0.09097786	231.2	-0.1298317	231.2	-0.08636373	231.2	-0.08021422	231.2	-0.08696344
231.4	1.169861	231.4	1.085886	231.4	1.110045	231.4	1.105827	231.4	1.034325	231.4	1.118931	231.4	1.132308	231.4	-0.1326787	231.4	-0.1131074	231.4	-0.1700516	231.4	-0.1112436	231.4	-0.08464462	231.4	-0.1276278	231.4	-0.08777049	231.4	-0.07918277	231.4	-0.08617824
231.6	1.166872	231.6	1.085229	231.6	1.112833	231.6	1.103153	231.6	1.037589	231.6	1.118042	231.6	1.129332	231.6	-0.1300146	231.6	-0.1076238	231.6	-0.1733049	231.6	-0.111621	231.6	-0.08736299	231.6	-0.129253	231.6	-0.08973738	231.6	-0.08471103	231.6	-0.08581844
231.8	1.167267	231.8	1.080073	231.8	1.115223	231.8	1.106913	231.8	1.036585	231.8	1.12128	231.8	1.132298	231.8	-0.1325841	231.8	-0.1111367	231.8	-0.1705774	231.8	-0.1127061	231.8	-0.08955473	231.8	-0.1319168	231.8	-0.08913618	231.8	-0.07763517	231.8	-0.08699618
232	1.16127	232	1.085224	232	1.112232	232	1.105393	232	1.03642	232	1.118897	232	1.130122	232	-0.1279129	232	-0.1147153	232	-0.1647907	232	-0.1112525	232	-0.09068515	232	-0.129416	232	-0.08735985	232	-0.08090664	232	-0.0833116
232.2	1.169141	232.2	1.086292	232.2	1.115906	232.2	1.104326	232.2	1.039668	232.2	1.117497	232.2	1.13251	232.2	-0.131661	232.2	-0.1109396	232.2	-0.166021	232.2	-0.1176396	232.2	-0.08766767	232.2	-0.1305395	232.2	-0.0855106	232.2	-0.07739868	232.2	-0.07936996
232.4	1.170504	232.4	1.08528	232.4	1.110652	232.4	1.106305	232.4	1.036052	232.4	1.120316	232.4	1.133077	232.4	-0.1370618	232.4	-0.1099599	232.4	-0.1668628	232.4	-0.1061613	232.4	-0.08470763	232.4	-0.1303097	232.4	-0.08808015	232.4	-0.07688783	232.4	-0.0870426
232.6	1.165767	232.6	1.089483	232.6	1.113352	232.6	1.108127	232.6	1.039257	232.6	1.118594	232.6	1.129034	232.6	-0.1314206	232.6	-0.1088701	232.6	-0.1683125	232.6	-0.1115127	232.6	-0.08428512	232.6	-0.1309348	232.6	-0.08695734	232.6	-0.07993578	232.6	-0.08580106
232.8	1.165558	232.8	1.086405	232.8	1.11395	232.8	1.108413	232.8	1.035835	232.8	1.120444	232.8	1.134049	232.8	-0.1302842	232.8	-0.108592	232.8	-0.1704956	232.8	-0.1092143	232.8	-0.08918422	232.8	-0.1280305	232.8	-0.09136412	232.8	-0.08198495	232.8	-0.08625973
233	1.171411	233	1.085842	233	1.11097	233	1.109927	233	1.040413	233	1.119036	233	1.128272	233	-0.1334227	233	-0.1099929	233	-0.1738109	233	-0.1081159	233	-0.08950678	233	-0.1302471	233	-0.08859541	233	-0.08118145	233	-0.0878741
233.2	1.169443	233.2	1.087304	233.2	1.118258	233.2	1.107758	233.2	1.041709	233.2	1.121976	233.2	1.129964	233.2	-0.126705	233.2	-0.1113587	233.2	-0.1672023	233.2	-0.1091923	233.2	-0.08543538	233.2	-0.1328426	233.2	-0.08936218	233.2	-0.0761617	233.2	-0.08519843
233.4	1.173029	233.4	1.088111	233.4	1.114779	233.4	1.102533	233.4	1.035095	233.4	1.120651	233.4	1.134316	233.4	-0.1263279	233.4	-0.1097315	233.4	-0.1671924	233.4	-0.1138064	233.4	-0.09047841	233.4	-0.1300244	233.4	-0.08472563	233.4	-0.0763398	233.4	-0.08745714
233.6	1.170499	233.6	1.093928	233.6	1.117592	233.6	1.10668	233.6	1.035828	233.6	1.121557	233.6	1.132687	233.6	-0.1304021	233.6	-0.1119917	233.6	-0.1684794	233.6	-0.1147448	233.6	-0.08709482	233.6	-0.1307977	233.6	-0.09002364	233.6	-0.07668373	233.6	-0.08314342
233.8	1.170801	233.8	1.089034	233.8	1.114426	233.8	1.111624	233.8	1.03881	233.8	1.121551	233.8	1.134697	233.8	-0.131035	233.8	-0.1090099	233.8	-0.1695302	233.8	-0.1107731	233.8	-0.08927698	233.8	-0.1304234	233.8	-0.08742665	233.8	-0.08144635	233.8	-0.08681541
234	1.171616	234	1.089399	234	1.110979	234	1.108858	234	1.035877	234	1.119295	234	1.130289	234	-0.1286773	234	-0.1099359	234	-0.1663739	234	-0.104929	234	-0.09032074	234	-0.1287815	234	-0.08501868	234	-0.07919758	234	-0.08956001
234.2	1.172887	234.2	1.088787	234.2	1.113656	234.2	1.10561	234.2	1.03884	234.2	1.116371	234.2	1.129979	234.2	-0.1329572	234.2	-0.1091171	234.2	-0.1683467	234.2	-0.1144536	234.2	-0.08555701	234.2	-0.1304319	234.2	-0.09034678	234.2	-0.07804774	234.2	-0.08795723
234.4	1.172499	234.4	1.093037	234.4	1.114958	234.4	1.110529	234.4	1.034055	234.4	1.120055	234.4	1.131405	234.4	-0.1295652	234.4	-0.1088035	234.4	-0.1683737	234.4	-0.109417	234.4	-0.08762399	234.4	-0.1256941	234.4	-0.08505311	234.4	-0.07578246	234.4	-0.08370607
234.6	1.173102	234.6	1.092627	234.6	1.114814	234.6	1.107698	234.6	1.043858	234.6	1.116128	234.6	1.135767	234.6	-0.1269349	234.6	-0.1048398	234.6	-0.1641398	234.6	-0.1094989	234.6	-0.08527054	234.6	-0.1309854	234.6	-0.08610726	234.6	-0.07802441	234.6	-0.08814307
234.8	1.17537	234.8	1.088193	234.8	1.11938	234.8	1.10933	234.8	1.042748	234.8	1.120851	234.8	1.134513	234.8	-0.1272613	234.8	-0.1068778	234.8	-0.1703218	234.8	-0.1131754	234.8	-0.08493309	234.8	-0.1297735	234.8	-0.08922422	234.8	-0.08001214	234.8	-0.08539417
235	1.173923	235	1.095572	235	1.117501	235	1.106823	235	1.03648	235	1.119223	235	1.132792	235	-0.1268426	235	-0.1082445	235	-0.1696563	235	-0.1150793	235	-0.0876699	235	-0.1323362	235	-0.08632012	235	-0.07736843	235	-0.08423937
235.2	1.1673	235.2	1.094845	235.2	1.115923	235.2	1.108424	235.2	1.040558	235.2	1.125542	235.2	1.1304	235.2	-0.1254483	235.2	-0.1071711	235.2	-0.1652954	235.2	-0.1097386	235.2	-0.08643755	235.2	-0.1305314	235.2	-0.08746731	235.2	-0.08009267	235.2	-0.08374635
235.4	1.172433	235.4	1.094027	235.4	1.117802	235.4	1.112068	235.4	1.040654	235.4	1.121257	235.4	1.134074	235.4	-0.127619	235.4	-0.1079417	235.4	-0.1645134	235.4	-0.1071751	235.4	-0.08697192	235.4	-0.1290789	235.4	-0.08463664	235.4	-0.08310249	235.4	-0.08607674
235.6	1.171422	235.6	1.094635	235.6	1.117244	235.6	1.106856	235.6	1.037818	235.6	1.121024	235.6	1.134144	235.6	-0.1288412	235.6	-0.1084847	235.6	-0.1639286	235.6	-0.1094252	235.6	-0.08862123	235.6	-0.1295714	235.6	-0.08647957	235.6	-0.07838642	235.6	-0.08524533
235.8	1.171544	235.8	1.092776	235.8	1.12064	235.8	1.112046	235.8	1.039922	235.8	1.120362	235.8	1.137735	235.8	-0.1342736	235.8	-0.107251	235.8	-0.1655354	235.8	-0.1084577	235.8	-0.08865862	235.8	-0.1288669	235.8	-0.08611939	235.8	-0.07605356	235.8	-0.08603527
236	1.171641	236	1.094448	236	1.118778	236	1.108185	236	1.038516	236	1.118474	236	1.131514	236	-0.1279644	236	-0.1058867	236	-0.1687196	236	-0.106871	236	-0.08803506	236	-0.1279926	236	-0.08758685	236	-0.07905194	236	-0.08637789
236.2	1.174772	236.2	1.096214	236.2	1.119233	236.2	1.112776	236.2	1.040159	236.2	1.121327	236.2	1.136629	236.2	-0.129361	236.2	-0.1086634	236.2	-0.162776	236.2	-0.1076729	236.2	-0.08637772	236.2	-0.125595	236.2	-0.08395408	236.2	-0.07871052	236.2	-0.08081689
236.4	1.17354	236.4	1.096852	236.4	1.119529	236.4	1.110506	236.4	1.039393	236.4	1.121949	236.4	1.135218	236.4	-0.1266174	236.4	-0.1059299	236.4	-0.1664316	236.4	-0.1074146	236.4	-0.08651145	236.4	-0.124853	236.4	-0.08427725	236.4	-0.07500319	236.4	-0.08825194
236.6	1.17686	236.6	1.098545	236.6	1.122341	236.6	1.114104	236.6	1.041018	236.6	1.120973	236.6	1.13704	236.6	-0.1289183	236.6	-0.1063356	236.6	-0.1645628	236.6	-0.1088855	236.6	-0.087577	236.6	-0.1302373	236.6	-0.07874184	236.6	-0.07631516	236.6	-0.08621826
236.8	1.176593	236.8	1.097302	236.8	1.117877	236.8	1.110741	236.8	1.042729	236.8	1.116136	236.8	1.13604	236.8	-0.1261765	236.8	-0.1072119	236.8	-0.1664567	236.8	-0.1119327	236.8	-0.08640704	236.8	-0.1268758	236.8	-0.07955115	236.8	-0.07690834	236.8	-0.08371481
237.01	1.177959	237.01	1.091245	237.01	1.121514	237.01	1.113715	237.01	1.045439	237.01	1.122074	237.01	1.133397	237.01	-0.1252962	237	-0.103422	237	-0.1653648	237	-0.1067173	237	-0.08462068	237	-0.1234151	237	-0.08012766	237	-0.07489026	237	-0.08523909
237.2	1.181416	237.2	1.093976	237.2	1.11561	237.2	1.109792	237.2	1.041003	237.2	1.119496	237.2	1.132664	237.2	-0.1266144	237.2	-0.1069679	237.2	-0.1658419	237.2	-0.1072119	237.2	-0.08531213	237.2	-0.1282493	237.2	-0.08552087	237.2	-0.07541469	237.2	-0.08044878
237.4	1.178607	237.4	1.098661	237.4	1.11556	237.4	1.113914	237.4	1.040386	237.4	1.125707	237.4	1.134286	237.4	-0.1268897	237.4	-0.1057276	237.4	-0.1648866	237.4	-0.1083641	237.4	-0.08030201	237.4	-0.126458	237.4	-0.08368686	237.4	-0.07834648	237.4	-0.08741903
237.6	1.178418	237.6	1.099346	237.6	1.122185	237.6	1.108004	237.6	1.040739	237.6	1.120535	237.6	1.133188	237.6	-0.1286287	237.6	-0.1077352	237.6	-0.1670767	237.6	-0.1087721	237.6	-0.0841915	237.6	-0.1226401	237.6	-0.0865361	237.6	-0.08009744	237.6	-0.08295919
237.8	1.177273	237.8	1.099651	237.8	1.115288	237.8	1.110022	237.8	1.039392	237.8	1.120501	237.8	1.134051	237.8	-0.1296947	237.8	-0.1134515	237.8	-0.1610796	237.8	-0.1128776	237.8	-0.08369694	237.8	-0.1255565	237.8	-0.08487445	237.8	-0.0757806	237.8	-0.08320083
238	1.181338	238	1.101493	238	1.121535	238	1.111753	238	1.043194	238	1.124612	238	1.131217	238	-0.1277559	238	-0.1075267	238	-0.1649248	238	-0.1063747	238	-0.08521609	238	-0.1254348	238	-0.08089587	238	-0.07547717	238	-0.08675141
238.2	1.183438	238.2	1.09674	238.2	1.121041	238.2	1.108468	238.2	1.044768	238.2	1.124898	238.2	1.134218	238.2	-0.1231407	238.2	-0.1032619	238.2	-0.1646472	238.2	-0.1110445	238.2	-0.08118233	238.2	-0.1282066	238.2	-0.08320738	238.2	-0.07902657	238.2	-0.07922115
238.4	1.184168	238.4	1.100186	238.4	1.12199	238.4	1.114042	238.4	1.041792	238.4	1.125762	238.4	1.138763	238.4	-0.1252957	238.4	-0.1037293	238.4	-0.165606	238.4	-0.1117063	238.4	-0.08284038	238.4	-0.12436	238.4	-0.08230237	238.4	-0.0769119	238.4	-0.08322551
238.6	1.184916	238.6	1.100664	238.6	1.120243	238.6	1.106375	238.6	1.041508	238.6	1.124344	238.6	1.136706	238.6	-0.131377	238.6	-0.1051593	238.6	-0.1624655	238.6	-0.1090383	238.6	-0.08325175	238.6	-0.1242988	238.6	-0.08057109	238.6	-0.07681915	238.6	-0.08498304
238.8	1.179552	238.8	1.094885	238.8	1.122203	238.8	1.111281	238.8	1.043817	238.8	1.120648	238.8	1.137164	238.8	-0.1281094	238.8	-0.1088994	238.8	-0.1643685	238.8	-0.1101607	238.8	-0.0870392	238.8	-0.1278986	238.8	-0.07925627	238.8	-0.07646412	238.8	-0.08316794
239	1.178853	239	1.098845	239	1.123848	239	1.112153	239	1.041399	239	1.120146	239	1.13202	239	-0.1278798	239	-0.1060605	239	-0.1664937	239	-0.113962	239	-0.08672043	239	-0.1275046	239	-0.08378855	239	-0.07956165	239	-0.08541243
239.2	1.182727	239.2	1.096647	239.2	1.121832	239.2	1.113486	239.2	1.044521	239.2	1.120051	239.2	1.137871	239.2	-0.1293765	239.2	-0.103614	239.2	-0.1622739	239.2	-0.1062175	239.2	-0.08527679	239.2	-0.1242184	239.2	-0.07819832	239.2	-0.07709734	239.2	-0.08209896
239.4	1.181124	239.4	1.100448	239.4	1.123581	239.4	1.113527	239.4	1.045794	239.4	1.125049	239.4	1.139657	239.4	-0.1276576	239.4	-0.1048095	239.4	-0.1651046	239.4	-0.1083304	239.4	-0.08236879	239.4	-0.1284711	239.4	-0.08353614	239.4	-0.07687502	239.4	-0.08414938
239.6	1.184868	239.6	1.099078	239.6	1.125445	239.6	1.115723	239.6	1.043529	239.6	1.123304	239.6	1.13705	239.6	-0.1238808	239.6	-0.1055272	239.6	-0.1617274	239.6	-0.103992	239.6	-0.0809006	239.6	-0.1240199	239.6	-0.08219975	239.6	-0.08140557	239.6	-0.08240712
239.8	1.187218	239.8	1.101854	239.8	1.125009	239.8	1.111019	239.8	1.041395	239.8	1.122513	239.8	1.138095	239.8	-0.1265708	239.8	-0.1008123	239.8	-0.1615606	239.8	-0.1082401	239.8	-0.08460024	239.8	-0.1278998	239.8	-0.08173789	239.8	-0.07669872	239.8	-0.08157127
240	1.183463	240	1.103864	240	1.126747	240	1.114058	240	1.043951	240	1.122849	240	1.136799	240	-0.1240841	240	-0.1073121	240	-0.1633508	240	-0.1077639	240	-0.08236536	240	-0.1269549	240	-0.08095229	240	-0.07768953	240	-0.08060396
240.2	1.184572	240.2	1.10607	240.2	1.120305	240.2	1.111578	240.2	1.041405	240.2	1.124136	240.2	1.135204	240.2	-0.1248674	240.2	-0.1057017	240.2	-0.1605525	240.2	-0.1077737	240.2	-0.08528293	240.2	-0.128612	240.2	-0.08508811	240.2	-0.07501044	240.2	-0.08061332
240.4	1.186452	240.4	1.101277	240.4	1.121116	240.4	1.118532	240.4	1.045927	240.4	1.122633	240.4	1.136161	240.4	-0.1256143	240.4	-0.1071931	240.4	-0.1624977	240.4	-0.1095807	240.4	-0.08371382	240.4	-0.1205456	240.4	-0.08117073	240.4	-0.07548671	240.4	-0.08378154
240.6	1.186817	240.6	1.098538	240.6	1.122781	240.6	1.115566	240.6	1.047435	240.6	1.122959	240.6	1.135384	240.6	-0.1230962	240.6	-0.1065818	240.6	-0.1606351	240.6	-0.1066178	240.6	-0.08545626	240.6	-0.126133	240.6	-0.08348102	240.6	-0.07438107	240.6	-0.07914209
240.8	1.186845	240.8	1.100321	240.8	1.127298	240.8	1.108711	240.8	1.046716	240.8	1.126229	240.8	1.136284	240.8	-0.1256703	240.8	-0.1073863	240.8	-0.1644244	240.8	-0.104997	240.8	-0.07953299	240.8	-0.1272373	240.8	-0.08545825	240.8	-0.07121244	240.8	-0.08455829
241	1.186462	241	1.101029	241	1.124724	241	1.11341	241	1.045699	241	1.127314	241	1.139068	241	-0.1223306	241	-0.1025915	241	-0.16561	241	-0.1026549	241	-0.08421469	241	-0.1265476	241	-0.0820893	241	-0.07447179	241	-0.08086788
241.2	1.183937	241.2	1.103219	241.2	1.121761	241.2	1.112725	241.2	1.044753	241.2	1.124875	241.2	1.137413	241.2	-0.1272128	241.2	-0.1028983	241.2	-0.1639499	241.2	-0.1069175	241.2	-0.0840046	241.2	-0.1259216	241.2	-0.08242766	241.2	-0.07199535	241.2	-0.08108863
241.4	1.190104	241.4	1.106502	241.4	1.126252	241.4	1.117672	241.4	1.045252	241.4	1.12369	241.4	1.136131	241.4	-0.1262922	241.4	-0.1040834	241.4	-0.1652541	241.4	-0.1040776	241.4	-0.08139046	241.4	-0.1236223	241.4	-0.08120455	241.4	-0.07598531	241.4	-0.08610442
241.6	1.186734	241.6	1.105154	241.6	1.123959	241.6	1.11543	241.6	1.042771	241.6	1.126248	241.6	1.138347	241.6	-0.1256226	241.6	-0.1071654	241.6	-0.1648281	241.6	-0.1056377	241.6	-0.08019996	241.6	-0.1261834	241.6	-0.08516656	241.6	-0.07525153	241.6	-0.08732917
241.8	1.185284	241.8	1.103929	241.8	1.123793	241.8	1.113815	241.8	1.047641	241.8	1.125785	241.8	1.13334	241.8	-0.1251745	241.8	-0.1025618	241.8	-0.1659178	241.8	-0.1053817	241.8	-0.08407541	241.8	-0.1233977	241.8	-0.08290373	241.8	-0.07666174	241.8	-0.07962978
242	1.191106	242	1.107533	242	1.124914	242	1.113617	242	1.045275	242	1.124722	242	1.136661	242	-0.1184666	242	-0.1054569	242	-0.1629074	242	-0.1081209	242	-0.0832177	242	-0.1258581	242	-0.07955227	242	-0.07462687	242	-0.08383686
242.2	1.190398	242.2	1.105291	242.2	1.122723	242.2	1.111409	242.2	1.043089	242.2	1.125295	242.2	1.139959	242.2	-0.1293836	242.2	-0.1086649	242.2	-0.1593567	242.2	-0.1063749	242.2	-0.07818868	242.2	-0.1238215	242.2	-0.08118507	242.2	-0.073468	242.2	-0.07830053
242.4	1.19294	242.4	1.104146	242.4	1.125526	242.4	1.119344	242.4	1.042732	242.4	1.122393	242.4	1.135644	242.4	-0.1220201	242.4	-0.1011643	242.4	-0.1665507	242.4	-0.1101366	242.4	-0.08257782	242.4	-0.1258879	242.4	-0.08713182	242.4	-0.07480613	242.4	-0.08148169
242.6	1.190366	242.6	1.110504	242.6	1.124153	242.6	1.113734	242.6	1.038987	242.6	1.12355	242.6	1.13499	242.6	-0.121792	242.6	-0.1095845	242.6	-0.1584479	242.6	-0.1046603	242.6	-0.07703488	242.6	-0.1283567	242.6	-0.08275601	242.6	-0.07494889	242.6	-0.08313199
242.8	1.195876	242.8	1.107537	242.8	1.127096	242.8	1.117827	242.8	1.04682	242.8	1.12715	242.8	1.138905	242.8	-0.124984	242.8	-0.1039595	242.8	-0.1645117	242.8	-0.1080845	242.8	-0.08109193	242.8	-0.1234889	242.8	-0.07637751	242.8	-0.07662007	242.8	-0.07683335
243	1.193609	243	1.105713	243	1.125608	243	1.114436	243	1.043218	243	1.126192	243	1.141387	243	-0.1238872	243	-0.1042916	243	-0.1654808	243	-0.1010375	243	-0.08250947	243	-0.1262907	243	-0.0811878	243	-0.07665244	243	-0.07985234
243.2	1.19474	243.2	1.105607	243.2	1.122623	243.2	1.117735	243.2	1.043886	243.2	1.127086	243.2	1.138417	243.2	-0.1239235	243.2	-0.1089363	243.2	-0.1579016	243.2	-0.1037801	243.2	-0.08143494	243.2	-0.1219097	243.2	-0.08660334	243.2	-0.07456304	243.2	-0.0824415
243.4	1.193514	243.4	1.10842	243.4	1.128369	243.4	1.119689	243.4	1.041964	243.4	1.126324	243.4	1.14169	243.4	-0.1174529	243.4	-0.1045035	243.4	-0.1593677	243.4	-0.104629	243.4	-0.08003116	243.4	-0.1260412	243.4	-0.08030847	243.4	-0.07554423	243.4	-0.07777263
243.6	1.19489	243.6	1.104445	243.6	1.128061	243.6	1.113233	243.6	1.045163	243.6	1.125898	243.6	1.138822	243.6	-0.1222051	243.6	-0.1050323	243.6	-0.1609717	243.6	-0.1033122	243.6	-0.08178355	243.6	-0.1215617	243.6	-0.07902484	243.6	-0.07355055	243.6	-0.08281378
243.8	1.189908	243.8	1.108264	243.8	1.126043	243.8	1.118836	243.8	1.051086	243.8	1.131366	243.8	1.135648	243.8	-0.1255121	243.8	-0.1007248	243.8	-0.1641632	243.8	-0.1041674	243.8	-0.08413821	243.8	-0.1246555	243.8	-0.07922959	243.8	-0.07652591	243.8	-0.07741914
244	1.190579	244	1.105299	244	1.129031	244	1.117131	244	1.050007	244	1.122154	244	1.140234	244	-0.1237633	244	-0.09895231	244	-0.1557637	244	-0.1016902	244	-0.08219232	244	-0.124974	244	-0.08109609	244	-0.07541629	244	-0.0805414
244.2	1.193907	244.2	1.10525	244.2	1.130064	244.2	1.115568	244.2	1.050018	244.2	1.12182	244.2	1.138046	244.2	-0.1230996	244.2	-0.09951096	244.2	-0.1586328	244.2	-0.1041793	244.2	-0.08167097	244.2	-0.1204649	244.2	-0.07823582	244.2	-0.07547292	244.2	-0.07992202
244.4	1.192711	244.4	1.10967	244.4	1.124293	244.4	1.114135	244.4	1.04704	244.4	1.12356	244.4	1.135729	244.4	-0.1222518	244.4	-0.1013155	244.4	-0.1603018	244.4	-0.1042872	244.4	-0.07980284	244.4	-0.125809	244.4	-0.07999008	244.4	-0.07283251	244.4	-0.08302736
244.6	1.195229	244.6	1.107929	244.6	1.128834	244.6	1.11913	244.6	1.045875	244.6	1.123958	244.6	1.139285	244.6	-0.1246253	244.6	-0.09935481	244.6	-0.1648208	244.6	-0.1013388	244.6	-0.08018187	244.6	-0.1232123	244.6	-0.07864767	244.6	-0.07074356	244.6	-0.08139315
244.8	1.194189	244.8	1.10603	244.8	1.12464	244.8	1.121051	244.8	1.047735	244.8	1.12725	244.8	1.141687	244.8	-0.1251514	244.8	-0.1058056	244.8	-0.1646949	244.8	-0.1051792	244.8	-0.08311983	244.8	-0.1246195	244.8	-0.08150359	244.8	-0.07451851	244.8	-0.0815537
245	1.195413	245	1.110262	245	1.12919	245	1.119855	245	1.048566	245	1.132032	245	1.137005	245	-0.1223799	245	-0.1025159	245	-0.156914	245	-0.1018031	245	-0.07403426	245	-0.1260859	245	-0.07816848	245	-0.07575211	245	-0.07483467
245.2	1.194459	245.2	1.108861	245.2	1.126271	245.2	1.115537	245.2	1.049127	245.2	1.12972	245.2	1.135946	245.2	-0.1226456	245.2	-0.102062	245.2	-0.1594285	245.2	-0.1036435	245.2	-0.08285036	245.2	-0.1220788	245.2	-0.08243878	245.2	-0.07312902	245.2	-0.08224057
245.4	1.194496	245.4	1.108557	245.4	1.128334	245.4	1.123467	245.4	1.047542	245.4	1.124417	245.4	1.138708	245.4	-0.122918	245.4	-0.1011813	245.4	-0.1627421	245.4	-0.1061466	245.4	-0.0814339	245.4	-0.1213323	245.4	-0.08427673	245.4	-0.07598192	245.4	-0.08031947
245.6	1.188201	245.6	1.108169	245.6	1.126379	245.6	1.120476	245.6	1.048471	245.6	1.129921	245.6	1.136873	245.6	-0.1219673	245.6	-0.09874211	245.6	-0.1577803	245.6	-0.1039116	245.6	-0.08005178	245.6	-0.1212121	245.6	-0.0819403	245.6	-0.07578424	245.6	-0.07914918
245.8	1.193874	245.8	1.109839	245.8	1.129121	245.8	1.117442	245.8	1.042814	245.8	1.12407	245.8	1.139307	245.8	-0.1203074	245.8	-0.1019496	245.8	-0.1628421	245.8	-0.1044803	245.8	-0.08094747	245.8	-0.1226036	245.8	-0.07828539	245.8	-0.07586426	245.8	-0.07897682
246	1.193307	246	1.10745	246	1.132567	246	1.119466	246	1.043959	246	1.126119	246	1.138778	246	-0.1237961	246	-0.1025835	246	-0.1574469	246	-0.1027746	246	-0.08207425	246	-0.1202225	246	-0.078352	246	-0.07634487	246	-0.07846789
246.2	1.192678	246.2	1.117834	246.2	1.132054	246.2	1.118011	246.2	1.042983	246.2	1.132647	246.2	1.139604	246.2	-0.1221245	246.2	-0.1009337	246.2	-0.1582176	246.2	-0.1061188	246.2	-0.07333556	246.2	-0.1247892	246.2	-0.07843061	246.2	-0.07580504	246.2	-0.07847246
246.4	1.196857	246.4	1.106789	246.4	1.128969	246.4	1.120785	246.4	1.045089	246.4	1.126887	246.4	1.141911	246.4	-0.12266	246.4	-0.09840538	246.4	-0.1602232	246.4	-0.1021246	246.4	-0.07884905	246.4	-0.1240541	246.4	-0.08050486	246.4	-0.06984366	246.4	-0.07870449
246.61	1.201425	246.61	1.111419	246.61	1.132016	246.61	1.120496	246.61	1.046923	246.61	1.131234	246.61	1.141401	246.61	-0.1263627	246.6	-0.1016861	246.6	-0.1576576	246.6	-0.104288	246.6	-0.08465271	246.6	-0.1243377	246.6	-0.07978716	246.6	-0.07301574	246.6	-0.0769053
246.8	1.203094	246.8	1.112797	246.8	1.131219	246.8	1.118848	246.8	1.049107	246.8	1.129615	246.8	1.137143	246.8	-0.1239138	246.8	-0.1045993	246.8	-0.1630799	246.8	-0.1017907	246.8	-0.08083814	246.8	-0.1251446	246.8	-0.08053209	246.8	-0.07541092	246.8	-0.07655733
247	1.203704	247	1.112724	247	1.134204	247	1.12088	247	1.046684	247	1.129071	247	1.142985	247	-0.1188933	247	-0.1040105	247	-0.1601087	247	-0.1047021	247	-0.07541458	247	-0.1236675	247	-0.07709289	247	-0.07416543	247	-0.07733072
247.2	1.202317	247.2	1.111274	247.2	1.132873	247.2	1.116129	247.2	1.044023	247.2	1.126009	247.2	1.14212	247.2	-0.1190007	247.2	-0.1021952	247.2	-0.1604579	247.2	-0.1024206	247.2	-0.07595737	247.2	-0.1218862	247.2	-0.08103432	247.2	-0.07197462	247.2	-0.07751618
247.4	1.205649	247.4	1.109251	247.4	1.133057	247.4	1.118502	247.4	1.046195	247.4	1.126758	247.4	1.140155	247.4	-0.1233309	247.4	-0.1022778	247.4	-0.1598	247.4	-0.1045629	247.4	-0.07898132	247.4	-0.1240922	247.4	-0.07965414	247.4	-0.0712576	247.4	-0.07973979
247.6	1.199666	247.6	1.114164	247.6	1.13733	247.6	1.120251	247.6	1.048494	247.6	1.129497	247.6	1.140477	247.6	-0.122588	247.6	-0.1001354	247.6	-0.1558626	247.6	-0.09848618	247.6	-0.07790312	247.6	-0.1212114	247.6	-0.07798	247.6	-0.06954236	247.6	-0.07751621
247.8	1.205096	247.8	1.112392	247.8	1.135693	247.8	1.117741	247.8	1.050515	247.8	1.129718	247.8	1.141615	247.8	-0.1230359	247.8	-0.1011069	247.8	-0.1611927	247.8	-0.09860969	247.8	-0.07511868	247.8	-0.1203505	247.8	-0.07937863	247.8	-0.07012358	247.8	-0.07830019
248	1.209303	248	1.116022	248	1.130331	248	1.122452	248	1.04502	248	1.12836	248	1.144006	248	-0.1210671	248	-0.0983327	248	-0.157125	248	-0.09538987	248	-0.08065787	248	-0.1245696	248	-0.07518055	248	-0.07184554	248	-0.07622959
248.2	1.201042	248.2	1.113338	248.2	1.130417	248.2	1.120912	248.2	1.0477	248.2	1.129884	248.2	1.140585	248.2	-0.1186408	248.2	-0.09949103	248.2	-0.162292	248.2	-0.1006319	248.2	-0.07508671	248.2	-0.1228901	248.2	-0.07831095	248.2	-0.07101884	248.2	-0.08210917
248.4	1.201114	248.4	1.116627	248.4	1.130695	248.4	1.125461	248.4	1.046377	248.4	1.128999	248.4	1.139961	248.4	-0.1251706	248.4	-0.1045678	248.4	-0.1575328	248.4	-0.1013628	248.4	-0.07677624	248.4	-0.1185534	248.4	-0.08233536	248.4	-0.0682205	248.4	-0.07718164
248.6	1.202439	248.6	1.119801	248.6	1.13119	248.6	1.117393	248.6	1.051589	248.6	1.126189	248.6	1.142566	248.6	-0.125018	248.6	-0.09862313	248.6	-0.1538055	248.6	-0.09741814	248.6	-0.08077265	248.6	-0.1187429	248.6	-0.07695053	248.6	-0.07257719	248.6	-0.07628885
248.8	1.201086	248.8	1.120379	248.8	1.131293	248.8	1.119961	248.8	1.050597	248.8	1.13236	248.8	1.142458	248.8	-0.1249092	248.8	-0.09761494	248.8	-0.154116	248.8	-0.1019724	248.8	-0.07466169	248.8	-0.1203432	248.8	-0.07788173	248.8	-0.07160579	248.8	-0.07637811
249	1.202101	249	1.115406	249	1.127015	249	1.119419	249	1.049868	249	1.13516	249	1.14224	249	-0.1220326	249	-0.09712815	249	-0.155864	249	-0.09828087	249	-0.07619501	249	-0.1195203	249	-0.07727238	249	-0.06934133	249	-0.08251119
249.2	1.203658	249.2	1.119172	249.2	1.129162	249.2	1.120744	249.2	1.046917	249.2	1.128307	249.2	1.139969	249.2	-0.1185832	249.2	-0.09659745	249.2	-0.161286	249.2	-0.09954824	249.2	-0.08449666	249.2	-0.1237177	249.2	-0.07762041	249.2	-0.07205731	249.2	-0.07559434
249.4	1.203166	249.4	1.112944	249.4	1.131682	249.4	1.117965	249.4	1.047312	249.4	1.133352	249.4	1.141405	249.4	-0.1172137	249.4	-0.09933442	249.4	-0.1544971	249.4	-0.1000274	249.4	-0.07568725	249.4	-0.1208039	249.4	-0.07966635	249.4	-0.07073729	249.4	-0.07625111
249.6	1.206329	249.6	1.118036	249.6	1.13252	249.6	1.123278	249.6	1.047689	249.6	1.130627	249.6	1.140903	249.6	-0.1196794	249.6	-0.1006532	249.6	-0.1593734	249.6	-0.1040006	249.6	-0.07440948	249.6	-0.1237643	249.6	-0.08058756	249.6	-0.07403261	249.6	-0.07615742
249.8	1.206448	249.8	1.118345	249.8	1.128305	249.8	1.120885	249.8	1.046539	249.8	1.127805	249.8	1.143934	249.8	-0.1224443	249.8	-0.1016202	249.8	-0.1581964	249.8	-0.103591	249.8	-0.07368941	249.8	-0.121553	249.8	-0.07674587	249.8	-0.06787767	249.8	-0.07796156
250	1.20426	250	1.115971	250	1.13413	250	1.123377	250	1.055913	250	1.128332	250	1.141016	250	-0.1171882	250	-0.09603342	250	-0.1580646	250	-0.09902596	250	-0.07983019	250	-0.1221347	250	-0.07537223	250	-0.0705435	250	-0.07766907
250.2	1.198249	250.2	1.113895	250.2	1.135648	250.2	1.120714	250.2	1.047091	250.2	1.127423	250.2	1.144529	250.2	-0.1211713	250.2	-0.1011379	250.2	-0.1553495	250.2	-0.09769548	250.2	-0.07805981	250.2	-0.119928	250.2	-0.07706536	250.2	-0.07437237	250.2	-0.07228853
250.4	1.206779	250.4	1.118538	250.4	1.133631	250.4	1.120385	250.4	1.051501	250.4	1.129961	250.4	1.14314	250.4	-0.1186256	250.4	-0.09743104	250.4	-0.1598831	250.4	-0.103049	250.4	-0.07559914	250.4	-0.1213748	250.4	-0.07595109	250.4	-0.06755296	250.4	-0.07894592
250.6	1.201117	250.6	1.118848	250.6	1.138394	250.6	1.125083	250.6	1.051876	250.6	1.130305	250.6	1.143017	250.6	-0.1233684	250.6	-0.0968779	250.6	-0.1595953	250.6	-0.09634872	250.6	-0.07650663	250.6	-0.1221491	250.6	-0.07607768	250.6	-0.07066073	250.6	-0.07850247
250.8	1.204626	250.8	1.120975	250.8	1.137044	250.8	1.124196	250.8	1.051299	250.8	1.130165	250.8	1.139208	250.8	-0.121638	250.8	-0.09637404	250.8	-0.1612724	250.8	-0.1017347	250.8	-0.07633139	250.8	-0.1171255	250.8	-0.07785259	250.8	-0.06794475	250.8	-0.07979751
251	1.205577	251	1.122381	251	1.136635	251	1.125237	251	1.044826	251	1.130964	251	1.142426	251	-0.1230174	251	-0.1009035	251	-0.1561393	251	-0.100112	251	-0.07714329	251	-0.121305	251	-0.07932711	251	-0.07145979	251	-0.07750869
251.2	1.207557	251.2	1.118491	251.2	1.13863	251.2	1.127756	251.2	1.052882	251.2	1.13093	251.2	1.145438	251.2	-0.1222241	251.2	-0.09833667	251.2	-0.1593214	251.2	-0.1031734	251.2	-0.07932293	251.2	-0.1212777	251.2	-0.07749107	251.2	-0.07100224	251.2	-0.07663661
251.4	1.212413	251.4	1.121836	251.4	1.137526	251.4	1.120791	251.4	1.051258	251.4	1.130386	251.4	1.14547	251.4	-0.1199739	251.4	-0.0994331	251.4	-0.1553141	251.4	-0.09904108	251.4	-0.07599272	251.4	-0.1214988	251.4	-0.07549622	251.4	-0.06823062	251.4	-0.07612941
251.6	1.208036	251.6	1.12104	251.6	1.139806	251.6	1.126179	251.6	1.050456	251.6	1.131946	251.6	1.145082	251.6	-0.1205793	251.6	-0.1030461	251.6	-0.1544515	251.6	-0.0973592	251.6	-0.073718	251.6	-0.1224579	251.6	-0.07444943	251.6	-0.0706134	251.6	-0.07987234
251.8	1.206617	251.8	1.12693	251.8	1.135278	251.8	1.123961	251.8	1.0436	251.8	1.132443	251.8	1.142579	251.8	-0.1196529	251.8	-0.1027373	251.8	-0.1577344	251.8	-0.09979373	251.8	-0.07662653	251.8	-0.1182183	251.8	-0.07895004	251.8	-0.0681878	251.8	-0.07809242
252	1.206481	252	1.121958	252	1.130783	252	1.125291	252	1.052508	252	1.128323	252	1.138749	252	-0.1216406	252	-0.09697805	252	-0.158299	252	-0.0963379	252	-0.07350033	252	-0.1187317	252	-0.07827971	252	-0.07183523	252	-0.07620344
252.2	1.203952	252.2	1.120954	252.2	1.133223	252.2	1.122366	252.2	1.053455	252.2	1.129653	252.2	1.140456	252.2	-0.1176977	252.2	-0.1013331	252.2	-0.1571284	252.2	-0.09890759	252.2	-0.07541706	252.2	-0.1236107	252.2	-0.07845977	252.2	-0.07103357	252.2	-0.08053619
252.4	1.214013	252.4	1.123053	252.4	1.135356	252.4	1.122175	252.4	1.050594	252.4	1.131111	252.4	1.141635	252.4	-0.1144662	252.4	-0.09761827	252.4	-0.1611694	252.4	-0.0972687	252.4	-0.0745642	252.4	-0.1212764	252.4	-0.07692219	252.4	-0.06992458	252.4	-0.07917489
252.6	1.206519	252.6	1.121268	252.6	1.135916	252.6	1.124782	252.6	1.051554	252.6	1.132951	252.6	1.142374	252.6	-0.1185714	252.6	-0.0989683	252.6	-0.1586435	252.6	-0.09507827	252.6	-0.07636527	252.6	-0.1177316	252.6	-0.07419146	252.6	-0.06928506	252.6	-0.07836207
252.8	1.210631	252.8	1.119058	252.8	1.13624	252.8	1.127928	252.8	1.05174	252.8	1.131148	252.8	1.142871	252.8	-0.1198449	252.8	-0.09757453	252.8	-0.1593494	252.8	-0.1033386	252.8	-0.07512683	252.8	-0.119642	252.8	-0.07583814	252.8	-0.0697666	252.8	-0.07902274
253	1.211683	253	1.125943	253	1.134509	253	1.120636	253	1.050436	253	1.130634	253	1.140405	253	-0.123378	253	-0.095446	253	-0.1564784	253	-0.09699638	253	-0.07929776	253	-0.1212977	253	-0.07123443	253	-0.06928172	253	-0.07470552
253.2	1.21445	253.2	1.122357	253.2	1.134753	253.2	1.124914	253.2	1.053115	253.2	1.132181	253.2	1.141403	253.2	-0.1201191	253.2	-0.1012184	253.2	-0.1541809	253.2	-0.09572159	253.2	-0.07583195	253.2	-0.1161425	253.2	-0.08051223	253.2	-0.0681022	253.2	-0.07537535
253.4	1.215973	253.4	1.125846	253.4	1.136598	253.4	1.123063	253.4	1.052678	253.4	1.135215	253.4	1.146315	253.4	-0.1185478	253.4	-0.1001064	253.4	-0.1550899	253.4	-0.09795791	253.4	-0.07793085	253.4	-0.1198685	253.4	-0.07646154	253.4	-0.06873663	253.4	-0.0754346
253.6	1.213473	253.6	1.122638	253.6	1.132807	253.6	1.126967	253.6	1.049585	253.6	1.136489	253.6	1.146478	253.6	-0.1181984	253.6	-0.09656649	253.6	-0.1572022	253.6	-0.09755061	253.6	-0.07400004	253.6	-0.1200872	253.6	-0.07338178	253.6	-0.06914063	253.6	-0.0742115
253.8	1.214694	253.8	1.126283	253.8	1.134974	253.8	1.126868	253.8	1.051559	253.8	1.134259	253.8	1.144667	253.8	-0.1165412	253.8	-0.1038382	253.8	-0.1546148	253.8	-0.1011611	253.8	-0.07518356	253.8	-0.1185287	253.8	-0.07696339	253.8	-0.0712602	253.8	-0.07391334
254	1.213213	254	1.130953	254	1.140426	254	1.123569	254	1.047156	254	1.137325	254	1.143448	254	-0.1208445	254	-0.1013155	254	-0.1578076	254	-0.09846045	254	-0.07581224	254	-0.1188828	254	-0.07591313	254	-0.06785306	254	-0.07207505
254.2	1.216436	254.2	1.124385	254.2	1.140662	254.2	1.126337	254.2	1.052321	254.2	1.13507	254.2	1.146476	254.2	-0.1162568	254.2	-0.09808882	254.2	-0.1575451	254.2	-0.1007627	254.2	-0.0716973	254.2	-0.1238135	254.2	-0.07347699	254.2	-0.06979024	254.2	-0.07448941
254.4	1.214573	254.4	1.127638	254.4	1.13981	254.4	1.131396	254.4	1.051038	254.4	1.131046	254.4	1.144472	254.4	-0.116372	254.4	-0.09689473	254.4	-0.1536555	254.4	-0.1011561	254.4	-0.06962416	254.4	-0.1193362	254.4	-0.07337831	254.4	-0.07054614	254.4	-0.07813112
254.6	1.215281	254.6	1.124901	254.6	1.141979	254.6	1.125119	254.6	1.051861	254.6	1.129627	254.6	1.144256	254.6	-0.1137714	254.6	-0.09893558	254.6	-0.1549871	254.6	-0.09480447	254.6	-0.0747663	254.6	-0.1185681	254.6	-0.07359625	254.6	-0.06885196	254.6	-0.07413186
254.8	1.217536	254.8	1.129138	254.8	1.141162	254.8	1.125982	254.8	1.053401	254.8	1.134567	254.8	1.1472	254.8	-0.1227979	254.8	-0.09494746	254.8	-0.1525202	254.8	-0.09993736	254.8	-0.07170281	254.8	-0.1183305	254.8	-0.07198954	254.8	-0.06804615	254.8	-0.07643871
255	1.209929	255	1.12565	255	1.140891	255	1.122461	255	1.054734	255	1.131668	255	1.144617	255	-0.1201173	255	-0.09667939	255	-0.1564374	255	-0.09859074	255	-0.07762168	255	-0.121872	255	-0.0775925	255	-0.06603251	255	-0.07013336
255.2	1.21426	255.2	1.129971	255.2	1.141237	255.2	1.126952	255.2	1.056234	255.2	1.130842	255.2	1.141835	255.2	-0.1160342	255.2	-0.09572504	255.2	-0.155315	255.2	-0.09550712	255.2	-0.07176913	255.2	-0.1147933	255.2	-0.07172579	255.2	-0.07049312	255.2	-0.07400062
255.4	1.216189	255.4	1.122357	255.4	1.14426	255.4	1.128648	255.4	1.04961	255.4	1.136461	255.4	1.146742	255.4	-0.1145222	255.4	-0.09326112	255.4	-0.1547731	255.4	-0.0988923	255.4	-0.07361051	255.4	-0.122423	255.4	-0.07646307	255.4	-0.06880911	255.4	-0.07018581
255.6	1.218078	255.6	1.127602	255.6	1.14042	255.6	1.126606	255.6	1.053239	255.6	1.133337	255.6	1.144473	255.6	-0.1141205	255.6	-0.09562087	255.6	-0.1570303	255.6	-0.09755056	255.6	-0.0753871	255.6	-0.1191783	255.6	-0.07982688	255.6	-0.06571995	255.6	-0.07442215
255.8	1.215718	255.8	1.128616	255.8	1.138359	255.8	1.125198	255.8	1.053346	255.8	1.134358	255.8	1.146616	255.8	-0.1191095	255.8	-0.09224536	255.8	-0.1539132	255.8	-0.1008325	255.8	-0.07044661	255.8	-0.1204362	255.8	-0.07065119	255.8	-0.06628821	255.8	-0.07147283
256	1.214426	256	1.126511	256	1.139625	256	1.127345	256	1.055207	256	1.132214	256	1.145091	256	-0.1201384	256	-0.09813961	256	-0.1560766	256	-0.09490892	256	-0.07728972	256	-0.1195028	256	-0.07563164	256	-0.06412773	256	-0.07377139
256.2	1.221638	256.2	1.129361	256.2	1.13649	256.2	1.130511	256.2	1.054342	256.2	1.133249	256.2	1.142328	256.2	-0.1208007	256.2	-0.08962397	256.2	-0.1559701	256.2	-0.09473464	256.2	-0.07164498	256.2	-0.1169971	256.2	-0.07268207	256.2	-0.06431027	256.2	-0.07534315
256.4	1.221643	256.4	1.123422	256.4	1.137753	256.4	1.124708	256.4	1.05167	256.4	1.133706	256.4	1.146398	256.4	-0.1212035	256.4	-0.09710956	256.4	-0.153823	256.4	-0.09697828	256.4	-0.07597689	256.4	-0.1190454	256.4	-0.07452416	256.4	-0.07084107	256.4	-0.07657104
256.6	1.219498	256.6	1.130397	256.6	1.13835	256.6	1.128363	256.6	1.054499	256.6	1.135789	256.6	1.147174	256.6	-0.119373	256.6	-0.09482715	256.6	-0.1527543	256.6	-0.09503248	256.6	-0.07680794	256.6	-0.117775	256.6	-0.07482643	256.6	-0.06602386	256.6	-0.06915338
256.8	1.215184	256.8	1.131071	256.8	1.133633	256.8	1.123317	256.8	1.051809	256.8	1.1386	256.8	1.14918	256.8	-0.115559	256.8	-0.09756845	256.8	-0.1525161	256.8	-0.09314444	256.8	-0.07675077	256.8	-0.1164533	256.8	-0.07451269	256.8	-0.06758785	256.8	-0.07566406
257	1.216369	257	1.130373	257	1.139282	257	1.130218	257	1.053032	257	1.132807	257	1.141712	257	-0.1176273	257	-0.09687833	257	-0.1539545	257	-0.09710981	257	-0.07260243	257	-0.1200752	257	-0.07371366	257	-0.07082912	257	-0.07132922
257.2	1.220102	257.2	1.123408	257.2	1.142235	257.2	1.130789	257.2	1.057203	257.2	1.137813	257.2	1.147038	257.2	-0.1167357	257.2	-0.09786636	257.2	-0.1526597	257.2	-0.09728137	257.2	-0.07216398	257.2	-0.1185586	257.2	-0.07373161	257.2	-0.06794806	257.2	-0.0757033
257.4	1.220235	257.4	1.128224	257.4	1.142413	257.4	1.129997	257.4	1.057722	257.4	1.135239	257.4	1.149044	257.4	-0.1168263	257.4	-0.09035289	257.4	-0.1570045	257.4	-0.09628248	257.4	-0.06940083	257.4	-0.1200977	257.4	-0.07300913	257.4	-0.06916481	257.4	-0.07455187
257.6	1.222799	257.6	1.129294	257.6	1.14134	257.6	1.128389	257.6	1.052431	257.6	1.134858	257.6	1.146915	257.6	-0.115968	257.6	-0.09703096	257.6	-0.1514227	257.6	-0.09489748	257.6	-0.07212496	257.6	-0.1144788	257.6	-0.07255148	257.6	-0.06616858	257.6	-0.07327368
257.8	1.216151	257.8	1.126814	257.8	1.147668	257.8	1.128181	257.8	1.053348	257.8	1.13655	257.8	1.149771	257.8	-0.1196448	257.8	-0.09259354	257.8	-0.1536687	257.8	-0.09616061	257.8	-0.06822345	257.8	-0.1153609	257.8	-0.07254647	257.8	-0.06862887	257.8	-0.07319675
258	1.219823	258	1.129626	258	1.144153	258	1.133641	258	1.05392	258	1.138299	258	1.14866	258	-0.115912	258	-0.09062696	258	-0.1515835	258	-0.09780857	258	-0.07444486	258	-0.1196925	258	-0.07235052	258	-0.06763612	258	-0.07327757
258.2	1.220536	258.2	1.131716	258.2	1.142161	258.2	1.127819	258.2	1.058412	258.2	1.136953	258.2	1.148596	258.2	-0.1139951	258.2	-0.09553366	258.2	-0.1557031	258.2	-0.09809479	258.2	-0.07512238	258.2	-0.1176624	258.2	-0.06911762	258.2	-0.07001029	258.2	-0.07676511
258.4	1.218186	258.4	1.128992	258.4	1.141776	258.4	1.128775	258.4	1.054078	258.4	1.133727	258.4	1.147559	258.4	-0.1186565	258.4	-0.09876435	258.4	-0.1517105	258.4	-0.0931967	258.4	-0.07122478	258.4	-0.1152424	258.4	-0.07189631	258.4	-0.06423346	258.4	-0.079185
258.6	1.22155	258.6	1.128026	258.6	1.140526	258.6	1.125891	258.6	1.05602	258.6	1.136143	258.6	1.147455	258.6	-0.1146848	258.6	-0.09622517	258.6	-0.1540191	258.6	-0.09333681	258.6	-0.07070268	258.6	-0.1165875	258.6	-0.07293611	258.6	-0.06539196	258.6	-0.07324152
258.8	1.220193	258.8	1.133354	258.8	1.14409	258.8	1.13264	258.8	1.054309	258.8	1.132867	258.8	1.152544	258.8	-0.1160103	258.8	-0.09932195	258.8	-0.1529256	258.8	-0.09259482	258.8	-0.07311894	258.8	-0.1162828	258.8	-0.07626843	258.8	-0.06470992	258.8	-0.07224297
259	1.219434	259	1.131818	259	1.144101	259	1.132185	259	1.056576	259	1.134879	259	1.145616	259	-0.1138875	259	-0.09749143	259	-0.1536679	259	-0.09473877	259	-0.07525399	259	-0.1157784	259	-0.07051985	259	-0.06756409	259	-0.07393922
259.2	1.220402	259.2	1.126248	259.2	1.14463	259.2	1.129179	259.2	1.055127	259.2	1.135803	259.2	1.148779	259.2	-0.1137987	259.2	-0.09253802	259.2	-0.1524395	259.2	-0.09448829	259.2	-0.07088779	259.2	-0.1160749	259.2	-0.07343243	259.2	-0.06334132	259.2	-0.07540987
259.4	1.222557	259.4	1.131824	259.4	1.145027	259.4	1.133591	259.4	1.056419	259.4	1.138402	259.4	1.146423	259.4	-0.1168677	259.4	-0.09574202	259.4	-0.1520265	259.4	-0.09261502	259.4	-0.06987742	259.4	-0.1165426	259.4	-0.06764206	259.4	-0.06715968	259.4	-0.06728943
259.6	1.223971	259.6	1.126479	259.6	1.142113	259.6	1.132507	259.6	1.053751	259.6	1.137865	259.6	1.148783	259.6	-0.1134127	259.6	-0.09647793	259.6	-0.1492025	259.6	-0.09416252	259.6	-0.07138344	259.6	-0.1158224	259.6	-0.06906204	259.6	-0.07331907	259.6	-0.07281926
259.8	1.22582	259.8	1.133585	259.8	1.141191	259.8	1.131091	259.8	1.057614	259.8	1.133734	259.8	1.148272	259.8	-0.1155524	259.8	-0.09689664	259.8	-0.1525089	259.8	-0.09549639	259.8	-0.06854175	259.8	-0.1189284	259.8	-0.07218557	259.8	-0.06345102	259.8	-0.07305949
260	1.222245	260	1.127673	260	1.144484	260	1.128108	260	1.057322	260	1.139147	260	1.151168	260	-0.1146437	260	-0.08913109	260	-0.1547125	260	-0.09234289	260	-0.06676921	260	-0.1174877	260	-0.07172202	260	-0.06995352	260	-0.07535239
260.2	1.222352	260.2	1.134908	260.2	1.143551	260.2	1.130099	260.2	1.057108	260.2	1.138041	260.2	1.149053	260.2	-0.1172255	260.2	-0.09609351	260.2	-0.1499445	260.2	-0.09235005	260.2	-0.07084579	260.2	-0.1193517	260.2	-0.07018439	260.2	-0.06272707	260.2	-0.07275293
260.4	1.219933	260.4	1.132521	260.4	1.141196	260.4	1.130999	260.4	1.052834	260.4	1.13954	260.4	1.145472	260.4	-0.1163088	260.4	-0.09145394	260.4	-0.151261	260.4	-0.09169717	260.4	-0.07005266	260.4	-0.119861	260.4	-0.0705008	260.4	-0.06657308	260.4	-0.07256605
260.6	1.223605	260.6	1.135651	260.6	1.14569	260.6	1.130476	260.6	1.058017	260.6	1.134676	260.6	1.144301	260.6	-0.1130893	260.6	-0.09237159	260.6	-0.1527234	260.6	-0.0904885	260.6	-0.07086245	260.6	-0.1132444	260.6	-0.07319342	260.6	-0.06923944	260.6	-0.06934826
260.8	1.226993	260.8	1.135406	260.8	1.144216	260.8	1.126853	260.8	1.058935	260.8	1.138903	260.8	1.148433	260.8	-0.1126274	260.8	-0.09726379	260.8	-0.1528809	260.8	-0.09423562	260.8	-0.0702858	260.8	-0.1144492	260.8	-0.073841	260.8	-0.0644768	260.8	-0.07362238
261	1.224001	261	1.133963	261	1.147059	261	1.131139	261	1.055075	261	1.136067	261	1.151144	261	-0.116846	261	-0.09738641	261	-0.1517871	261	-0.09434316	261	-0.07269537	261	-0.120192	261	-0.07637107	261	-0.06864732	261	-0.07255256
261.2	1.227562	261.2	1.134339	261.2	1.143917	261.2	1.130329	261.2	1.056726	261.2	1.137268	261.2	1.150694	261.2	-0.1168945	261.2	-0.09619545	261.2	-0.1496415	261.2	-0.09219197	261.2	-0.07175843	261.2	-0.1135378	261.2	-0.07157004	261.2	-0.06579653	261.2	-0.07247337
261.4	1.222713	261.4	1.13448	261.4	1.147655	261.4	1.133912	261.4	1.054779	261.4	1.137875	261.4	1.15165	261.4	-0.1163739	261.4	-0.0922633	261.4	-0.1523985	261.4	-0.09251802	261.4	-0.07020475	261.4	-0.1163045	261.4	-0.07241907	261.4	-0.0650791	261.4	-0.07019031
261.6	1.233502	261.6	1.13744	261.6	1.145798	261.6	1.130772	261.6	1.056794	261.6	1.143511	261.6	1.150259	261.6	-0.1176093	261.6	-0.09234221	261.6	-0.1533137	261.6	-0.09413486	261.6	-0.0700148	261.6	-0.1176331	261.6	-0.07447129	261.6	-0.06455048	261.6	-0.07278875
261.8	1.226012	261.8	1.134124	261.8	1.149552	261.8	1.131627	261.8	1.056256	261.8	1.139503	261.8	1.150798	261.8	-0.1139266	261.8	-0.0925088	261.8	-0.1523427	261.8	-0.09546496	261.8	-0.06848091	261.8	-0.1188825	261.8	-0.07125086	261.8	-0.06831847	261.8	-0.07407783
262	1.226355	262	1.136657	262	1.151115	262	1.135213	262	1.05692	262	1.139104	262	1.146773	262	-0.1173393	262	-0.09636311	262	-0.149595	262	-0.09442493	262	-0.07485913	262	-0.1133606	262	-0.07031488	262	-0.06895737	262	-0.07488382
262.2	1.22522	262.2	1.136432	262.2	1.149285	262.2	1.13171	262.2	1.05683	262.2	1.137029	262.2	1.152488	262.2	-0.1103764	262.2	-0.09172577	262.2	-0.1493003	262.2	-0.09494393	262.2	-0.06956769	262.2	-0.1136704	262.2	-0.0689532	262.2	-0.06458651	262.2	-0.07270931
262.4	1.225008	262.4	1.13863	262.4	1.148206	262.4	1.134423	262.4	1.057416	262.4	1.137254	262.4	1.148212	262.4	-0.1159069	262.4	-0.09262662	262.4	-0.1534133	262.4	-0.09502619	262.4	-0.06861041	262.4	-0.115697	262.4	-0.06698614	262.4	-0.06384118	262.4	-0.07058372
262.6	1.225905	262.6	1.137994	262.6	1.146469	262.6	1.132912	262.6	1.056131	262.6	1.138748	262.6	1.149276	262.6	-0.1123454	262.6	-0.08736418	262.6	-0.1488227	262.6	-0.09285684	262.6	-0.06910428	262.6	-0.1152346	262.6	-0.06953403	262.6	-0.06452952	262.6	-0.07172442
262.8	1.230382	262.8	1.136541	262.8	1.149269	262.8	1.133663	262.8	1.058167	262.8	1.143217	262.8	1.148126	262.8	-0.1191554	262.8	-0.0915741	262.8	-0.1500009	262.8	-0.09016256	262.8	-0.06740399	262.8	-0.1140295	262.8	-0.07337938	262.8	-0.06082582	262.8	-0.07081239
263	1.225787	263	1.137147	263	1.151601	263	1.136064	263	1.058158	263	1.137585	263	1.14972	263	-0.1134488	263	-0.09554891	263	-0.1528884	263	-0.09189557	263	-0.0725347	263	-0.1128824	263	-0.07390346	263	-0.06528933	263	-0.07310902
263.2	1.228141	263.2	1.141641	263.2	1.151878	263.2	1.133582	263.2	1.056031	263.2	1.139979	263.2	1.147979	263.2	-0.1135316	263.2	-0.0923724	263.2	-0.1528579	263.2	-0.08960287	263.2	-0.06796077	263.2	-0.1136344	263.2	-0.0690787	263.2	-0.06583722	263.2	-0.0691097
263.4	1.228114	263.4	1.139904	263.4	1.147875	263.4	1.131982	263.4	1.062235	263.4	1.142153	263.4	1.151381	263.4	-0.1170283	263.4	-0.09970465	263.4	-0.1519542	263.4	-0.09337781	263.4	-0.07621742	263.4	-0.1161681	263.4	-0.07051884	263.4	-0.05962969	263.4	-0.06980341
263.6	1.232047	263.6	1.140461	263.6	1.149298	263.6	1.13597	263.6	1.058428	263.6	1.140735	263.6	1.150495	263.6	-0.1154106	263.6	-0.09195163	263.6	-0.1542749	263.6	-0.09057993	263.6	-0.06907439	263.6	-0.1170564	263.6	-0.07204115	263.6	-0.06156736	263.6	-0.07273458
263.8	1.23532	263.8	1.136738	263.8	1.147493	263.8	1.1333	263.8	1.059585	263.8	1.139279	263.8	1.147782	263.8	-0.1140116	263.8	-0.09323646	263.8	-0.1526649	263.8	-0.08914172	263.8	-0.07231827	263.8	-0.1114709	263.8	-0.06988619	263.8	-0.06489624	263.8	-0.06775543
264	1.227535	264	1.140716	264	1.147589	264	1.136581	264	1.054191	264	1.138042	264	1.150966	264	-0.1143139	264	-0.09350111	264	-0.1487004	264	-0.08986595	264	-0.07086897	264	-0.1148502	264	-0.06809793	264	-0.06480497	264	-0.07013603
264.2	1.22933	264.2	1.13855	264.2	1.148413	264.2	1.134539	264.2	1.063082	264.2	1.140414	264.2	1.150598	264.2	-0.1126066	264.2	-0.09141878	264.2	-0.1484388	264.2	-0.09293053	264.2	-0.06578401	264.2	-0.1171915	264.2	-0.06938729	264.2	-0.06613559	264.2	-0.06976526
264.4	1.232718	264.4	1.136087	264.4	1.147681	264.4	1.133685	264.4	1.058648	264.4	1.137324	264.4	1.150386	264.4	-0.1135112	264.4	-0.08758567	264.4	-0.1501634	264.4	-0.09353764	264.4	-0.06870627	264.4	-0.1098634	264.4	-0.07054415	264.4	-0.06441164	264.4	-0.07118452
264.6	1.23373	264.6	1.140988	264.6	1.148692	264.6	1.133185	264.6	1.061863	264.6	1.140873	264.6	1.146501	264.6	-0.1113529	264.6	-0.0896576	264.6	-0.1497777	264.6	-0.08848855	264.6	-0.06931648	264.6	-0.1186525	264.6	-0.06817416	264.6	-0.05980697	264.6	-0.07220596
264.8	1.23334	264.8	1.137186	264.8	1.145237	264.8	1.136265	264.8	1.060942	264.8	1.142273	264.8	1.152468	264.8	-0.1147898	264.8	-0.09343323	264.8	-0.1487573	264.8	-0.09086028	264.8	-0.0691233	264.8	-0.1117135	264.8	-0.07132443	264.8	-0.06211895	264.8	-0.06706546
265	1.22907	265	1.139511	265	1.154614	265	1.135821	265	1.055051	265	1.138398	265	1.149753	265	-0.1146059	265	-0.0937673	265	-0.148474	265	-0.09511115	265	-0.06478544	265	-0.1151403	265	-0.06994082	265	-0.06291039	265	-0.07089028
265.2	1.233348	265.2	1.142404	265.2	1.147438	265.2	1.134335	265.2	1.063684	265.2	1.139247	265.2	1.150681	265.2	-0.1160989	265.2	-0.09127316	265.2	-0.1530899	265.2	-0.09109389	265.2	-0.06927434	265.2	-0.1131209	265.2	-0.06848054	265.2	-0.062764	265.2	-0.06831682
265.4	1.23217	265.4	1.139751	265.4	1.151096	265.4	1.138229	265.4	1.055252	265.4	1.138764	265.4	1.152454	265.4	-0.1126789	265.4	-0.08857261	265.4	-0.1506969	265.4	-0.0911791	265.4	-0.06500528	265.4	-0.1129597	265.4	-0.06980908	265.4	-0.06453686	265.4	-0.06517291
265.6	1.235261	265.6	1.142905	265.6	1.152592	265.6	1.13163	265.6	1.056973	265.6	1.137979	265.6	1.150987	265.6	-0.1166551	265.6	-0.09311013	265.6	-0.1485979	265.6	-0.09381691	265.6	-0.073349	265.6	-0.113609	265.6	-0.07120554	265.6	-0.06443923	265.6	-0.0668042
265.8	1.232344	265.8	1.138321	265.8	1.154803	265.8	1.135272	265.8	1.054664	265.8	1.139437	265.8	1.150717	265.8	-0.1144717	265.8	-0.09238949	265.8	-0.1514854	265.8	-0.0922919	265.8	-0.06640429	265.8	-0.1114618	265.8	-0.07288416	265.8	-0.06369398	265.8	-0.06828418
266	1.231034	266	1.145996	266	1.152676	266	1.137191	266	1.063254	266	1.14251	266	1.148973	266	-0.109367	266	-0.08949637	266	-0.1479637	266	-0.09314203	266	-0.06637139	266	-0.1129487	266	-0.06954563	266	-0.05986929	266	-0.07139058
266.2	1.232347	266.2	1.140113	266.2	1.151721	266.2	1.131161	266.2	1.061671	266.2	1.141765	266.2	1.14951	266.2	-0.109629	266.2	-0.09265903	266.2	-0.1496529	266.2	-0.08894348	266.2	-0.06781186	266.2	-0.1121844	266.2	-0.06760246	266.2	-0.05658024	266.2	-0.06908298
266.4	1.235313	266.4	1.141882	266.4	1.151592	266.4	1.137526	266.4	1.062436	266.4	1.141296	266.4	1.154824	266.4	-0.1113328	266.4	-0.09152239	266.4	-0.1477824	266.4	-0.08908567	266.4	-0.06411874	266.4	-0.1132827	266.4	-0.06579328	266.4	-0.06469261	266.4	-0.0699948
266.6	1.23369	266.6	1.143762	266.6	1.154429	266.6	1.138902	266.6	1.061952	266.6	1.137465	266.6	1.151765	266.6	-0.1128077	266.6	-0.08883861	266.6	-0.1505506	266.6	-0.08857514	266.6	-0.06751115	266.6	-0.1100835	266.6	-0.07053693	266.6	-0.0672361	266.6	-0.07211053
266.8	1.233348	266.8	1.141898	266.8	1.1525	266.8	1.135667	266.8	1.056991	266.8	1.141978	266.8	1.154382	266.8	-0.1168556	266.8	-0.09087981	266.8	-0.1465915	266.8	-0.09072468	266.8	-0.06799903	266.8	-0.1128821	266.8	-0.06948806	266.8	-0.06297696	266.8	-0.06958267
267	1.23368	267	1.144245	267	1.149542	267	1.135553	267	1.059098	267	1.13672	267	1.152542	267	-0.114254	267	-0.09359071	267	-0.1529423	267	-0.08571076	267	-0.06628542	267	-0.1099489	267	-0.06920832	267	-0.06132364	267	-0.06823711
267.2	1.234622	267.2	1.144238	267.2	1.150304	267.2	1.136886	267.2	1.059901	267.2	1.146223	267.2	1.155922	267.2	-0.113901	267.2	-0.08877483	267.2	-0.1465675	267.2	-0.09277505	267.2	-0.07134189	267.2	-0.1083332	267.2	-0.07278071	267.2	-0.06544137	267.2	-0.07154238
267.4	1.234054	267.4	1.14185	267.4	1.153581	267.4	1.136552	267.4	1.062629	267.4	1.143938	267.4	1.152091	267.4	-0.1103459	267.4	-0.08989642	267.4	-0.1492684	267.4	-0.0901746	267.4	-0.0700155	267.4	-0.116129	267.4	-0.06853611	267.4	-0.06287979	267.4	-0.06942808
267.6	1.235209	267.6	1.142354	267.6	1.149056	267.6	1.138524	267.6	1.059295	267.6	1.13804	267.6	1.150162	267.6	-0.113763	267.6	-0.09165695	267.6	-0.1487334	267.6	-0.08503268	267.6	-0.07174061	267.6	-0.1113625	267.6	-0.07384156	267.6	-0.06239927	267.6	-0.06610816
267.8	1.235201	267.8	1.148216	267.8	1.150916	267.8	1.140893	267.8	1.064214	267.8	1.14109	267.8	1.147894	267.8	-0.1114499	267.8	-0.08745179	267.8	-0.1489023	267.8	-0.09065611	267.8	-0.06235671	267.8	-0.1089036	267.8	-0.07130693	267.8	-0.0615468	267.8	-0.06785718
268	1.239208	268	1.144695	268	1.149079	268	1.135355	268	1.062614	268	1.146084	268	1.151549	268	-0.1156393	268	-0.08895982	268	-0.1467869	268	-0.08797503	268	-0.06522772	268	-0.1094104	268	-0.0713601	268	-0.06645442	268	-0.06844236
268.2	1.235916	268.2	1.141981	268.2	1.151727	268.2	1.138131	268.2	1.062271	268.2	1.141065	268.2	1.151452	268.2	-0.1126401	268.2	-0.08997092	268.2	-0.148156	268.2	-0.08817527	268.2	-0.06577048	268.2	-0.111179	268.2	-0.06419937	268.2	-0.06108186	268.2	-0.07000306
268.4	1.236607	268.4	1.140247	268.4	1.152918	268.4	1.137559	268.4	1.057905	268.4	1.146001	268.4	1.152394	268.4	-0.1105324	268.4	-0.095406	268.4	-0.1525785	268.4	-0.08954637	268.4	-0.06948052	268.4	-0.1064896	268.4	-0.06740373	268.4	-0.05768774	268.4	-0.06685936
268.6	1.237265	268.6	1.141556	268.6	1.153167	268.6	1.138155	268.6	1.058118	268.6	1.140296	268.6	1.153763	268.6	-0.1099377	268.6	-0.09443639	268.6	-0.1507079	268.6	-0.09023336	268.6	-0.06456845	268.6	-0.1156983	268.6	-0.06879118	268.6	-0.05990612	268.6	-0.06982519
268.8	1.23843	268.8	1.14696	268.8	1.153236	268.8	1.139566	268.8	1.059694	268.8	1.142462	268.8	1.154737	268.8	-0.111248	268.8	-0.08880804	268.8	-0.1461665	268.8	-0.08858284	268.8	-0.06717034	268.8	-0.1142063	268.8	-0.06851836	268.8	-0.06298114	268.8	-0.0698777
269	1.239804	269	1.144457	269	1.153929	269	1.133751	269	1.060392	269	1.143318	269	1.14814	269	-0.1115553	269	-0.09122829	269	-0.1516014	269	-0.0877613	269	-0.06576921	269	-0.1119279	269	-0.0653657	269	-0.06480647	269	-0.06870615
269.2	1.238132	269.2	1.14589	269.2	1.153833	269.2	1.143146	269.2	1.06042	269.2	1.138271	269.2	1.148576	269.2	-0.108414	269.2	-0.09254511	269.2	-0.1451584	269.2	-0.0895221	269.2	-0.06558961	269.2	-0.1117969	269.2	-0.0657552	269.2	-0.06111937	269.2	-0.07225162
269.4	1.234815	269.4	1.14403	269.4	1.159012	269.4	1.137111	269.4	1.060382	269.4	1.142471	269.4	1.150599	269.4	-0.1096174	269.4	-0.08781741	269.4	-0.1477104	269.4	-0.09159382	269.4	-0.064564	269.4	-0.1127395	269.4	-0.06450862	269.4	-0.06331239	269.4	-0.06629071
269.6	1.233603	269.6	1.142756	269.6	1.154099	269.6	1.139485	269.6	1.061004	269.6	1.140111	269.6	1.154571	269.6	-0.1157178	269.6	-0.09072162	269.6	-0.1463343	269.6	-0.09306158	269.6	-0.06808048	269.6	-0.1132541	269.6	-0.07115982	269.6	-0.0603584	269.6	-0.06447329
269.8	1.238964	269.8	1.144876	269.8	1.161752	269.8	1.135328	269.8	1.062197	269.8	1.141605	269.8	1.15112	269.8	-0.1138846	269.8	-0.09140964	269.8	-0.1494922	269.8	-0.0868244	269.8	-0.06910758	269.8	-0.1111122	269.8	-0.0686096	269.8	-0.06016671	269.8	-0.06840467
270	1.239764	270	1.144927	270	1.156361	270	1.143823	270	1.059541	270	1.144713	270	1.155537	270	-0.1100021	270	-0.08878919	270	-0.1451234	270	-0.08912158	270	-0.06616484	270	-0.1098593	270	-0.06840736	270	-0.06056355	270	-0.06658684
270.2	1.239642	270.2	1.147397	270.2	1.158336	270.2	1.138077	270.2	1.061206	270.2	1.143868	270.2	1.154855	270.2	-0.1125997	270.2	-0.09289909	270.2	-0.1435861	270.2	-0.0899066	270.2	-0.06727818	270.2	-0.1095553	270.2	-0.06702305	270.2	-0.06077953	270.2	-0.06835721
270.4	1.248651	270.4	1.142596	270.4	1.154795	270.4	1.141055	270.4	1.055835	270.4	1.147816	270.4	1.15199	270.4	-0.111796	270.4	-0.08707192	270.4	-0.1482809	270.4	-0.08996704	270.4	-0.06851386	270.4	-0.1147296	270.4	-0.06574416	270.4	-0.06357022	270.4	-0.06564993
270.6	1.243935	270.6	1.148581	270.6	1.154034	270.6	1.138956	270.6	1.061876	270.6	1.142512	270.6	1.150965	270.6	-0.1124247	270.6	-0.08811954	270.6	-0.1436379	270.6	-0.08736253	270.6	-0.0636773	270.6	-0.1087215	270.6	-0.06379811	270.6	-0.05720223	270.6	-0.06566844
270.8	1.242274	270.8	1.147514	270.8	1.154187	270.8	1.138595	270.8	1.064171	270.8	1.139924	270.8	1.151099	270.8	-0.1098433	270.8	-0.09156284	270.8	-0.1462463	270.8	-0.08779926	270.8	-0.07101471	270.8	-0.1146286	270.8	-0.06595672	270.8	-0.05918173	270.8	-0.0629715
271	1.246573	271	1.148382	271	1.155176	271	1.13972	271	1.061943	271	1.138382	271	1.15297	271	-0.1082096	271	-0.08529469	271	-0.1424216	271	-0.08283169	271	-0.06503681	271	-0.1108727	271	-0.0608006	271	-0.05973171	271	-0.07103824
271.2	1.242714	271.2	1.148291	271.2	1.151683	271.2	1.13718	271.2	1.060287	271.2	1.143425	271.2	1.157369	271.2	-0.1110358	271.2	-0.08997765	271.2	-0.1445759	271.2	-0.08369914	271.2	-0.0638559	271.2	-0.1132142	271.2	-0.06479166	271.2	-0.05823605	271.2	-0.06792639
271.4	1.243607	271.4	1.143352	271.4	1.156	271.4	1.138618	271.4	1.063974	271.4	1.145164	271.4	1.155657	271.4	-0.1083127	271.4	-0.0866356	271.4	-0.145021	271.4	-0.08734645	271.4	-0.0650188	271.4	-0.1066069	271.4	-0.06472845	271.4	-0.06318189	271.4	-0.06378454
271.6	1.245568	271.6	1.14554	271.6	1.15515	271.6	1.145941	271.6	1.06755	271.6	1.142535	271.6	1.155602	271.6	-0.1120635	271.6	-0.08688062	271.6	-0.1401705	271.6	-0.08695492	271.6	-0.0631188	271.6	-0.1114294	271.6	-0.06346522	271.6	-0.06108265	271.6	-0.06858584
271.8	1.244937	271.8	1.147568	271.8	1.156024	271.8	1.140606	271.8	1.059708	271.8	1.147839	271.8	1.153461	271.8	-0.107807	271.8	-0.08559702	271.8	-0.1446736	271.8	-0.08860391	271.8	-0.06741001	271.8	-0.1109324	271.8	-0.06695831	271.8	-0.05884965	271.8	-0.06895395
272	1.241096	272	1.14856	272	1.158803	272	1.136201	272	1.066254	272	1.143701	272	1.152787	272	-0.10764	272	-0.08626752	272	-0.1446092	272	-0.08405896	272	-0.07138488	272	-0.1107916	272	-0.07103649	272	-0.05918577	272	-0.06300226
272.2	1.242908	272.2	1.150441	272.2	1.157732	272.2	1.141029	272.2	1.062239	272.2	1.144849	272.2	1.154873	272.2	-0.1094782	272.2	-0.08773541	272.2	-0.1398964	272.2	-0.08917013	272.2	-0.06914609	272.2	-0.1123973	272.2	-0.06542426	272.2	-0.06145877	272.2	-0.06738711
272.4	1.24621	272.4	1.151347	272.4	1.15536	272.4	1.144391	272.4	1.061196	272.4	1.143674	272.4	1.156402	272.4	-0.1094104	272.4	-0.08463842	272.4	-0.1426051	272.4	-0.08559478	272.4	-0.06872949	272.4	-0.1104313	272.4	-0.06735579	272.4	-0.05990166	272.4	-0.06500887
272.6	1.241819	272.6	1.152365	272.6	1.158343	272.6	1.140904	272.6	1.063609	272.6	1.141521	272.6	1.154809	272.6	-0.1114696	272.6	-0.08345871	272.6	-0.1435698	272.6	-0.08493987	272.6	-0.06549287	272.6	-0.1142504	272.6	-0.06584673	272.6	-0.05950113	272.6	-0.06927074
272.8	1.243397	272.8	1.149593	272.8	1.15705	272.8	1.139096	272.8	1.06239	272.8	1.146706	272.8	1.153273	272.8	-0.1116368	272.8	-0.08808085	272.8	-0.1435399	272.8	-0.08461391	272.8	-0.05831293	272.8	-0.1069838	272.8	-0.06568303	272.8	-0.06445887	272.8	-0.06666435
273	1.247414	273	1.148726	273	1.156682	273	1.142692	273	1.063695	273	1.146517	273	1.154361	273	-0.111198	273	-0.08776771	273	-0.1489626	273	-0.0873372	273	-0.06627562	273	-0.1129439	273	-0.06197057	273	-0.0613808	273	-0.06480975
273.2	1.244191	273.2	1.149222	273.2	1.160614	273.2	1.143856	273.2	1.065805	273.2	1.145001	273.2	1.154961	273.2	-0.1088918	273.2	-0.08703423	273.2	-0.1459995	273.2	-0.08660834	273.2	-0.06483471	273.2	-0.1104644	273.2	-0.0647572	273.2	-0.05944637	273.2	-0.06575216
273.4	1.245839	273.4	1.156112	273.4	1.162548	273.4	1.142655	273.4	1.060072	273.4	1.148924	273.4	1.152104	273.4	-0.1089143	273.4	-0.08649515	273.4	-0.1444701	273.4	-0.08977321	273.4	-0.06084411	273.4	-0.1140105	273.4	-0.06665456	273.4	-0.06234436	273.4	-0.06460613
273.6	1.24851	273.6	1.157572	273.6	1.158159	273.6	1.146528	273.6	1.060419	273.6	1.140672	273.6	1.156592	273.6	-0.1120625	273.6	-0.08882822	273.6	-0.14376	273.6	-0.0868447	273.6	-0.06202481	273.6	-0.1079553	273.6	-0.06399907	273.6	-0.06126405	273.6	-0.06812071
273.8	1.244848	273.8	1.152579	273.8	1.158377	273.8	1.139299	273.8	1.063214	273.8	1.144474	273.8	1.156189	273.8	-0.1118127	273.8	-0.08380673	273.8	-0.1444217	273.8	-0.09065691	273.8	-0.06253197	273.8	-0.1121929	273.8	-0.0698342	273.8	-0.06315625	273.8	-0.0678467
274	1.244798	274	1.152402	274	1.160937	274	1.144965	274	1.061714	274	1.146247	274	1.156028	274	-0.1128757	274	-0.08621728	274	-0.1468406	274	-0.08465161	274	-0.06529992	274	-0.1094643	274	-0.06441943	274	-0.05878758	274	-0.06708013
274.2	1.253111	274.2	1.154393	274.2	1.160167	274.2	1.14133	274.2	1.063402	274.2	1.147056	274.2	1.158154	274.2	-0.1106288	274.2	-0.08634848	274.2	-0.1456234	274.2	-0.08120533	274.2	-0.06371391	274.2	-0.1144633	274.2	-0.0674914	274.2	-0.06145821	274.2	-0.06214922
274.41	1.249297	274.41	1.148933	274.41	1.162629	274.41	1.14089	274.41	1.064241	274.41	1.144177	274.41	1.154934	274.41	-0.1089082	274.4	-0.08671872	274.4	-0.1464236	274.4	-0.08948856	274.4	-0.06607763	274.4	-0.1121842	274.4	-0.06567573	274.4	-0.06040424	274.4	-0.06380896
274.6	1.248653	274.6	1.153391	274.6	1.15897	274.6	1.140709	274.6	1.062013	274.6	1.147843	274.6	1.154882	274.6	-0.1098003	274.6	-0.08410132	274.6	-0.1438993	274.6	-0.09031612	274.6	-0.06403699	274.6	-0.1092101	274.6	-0.06403926	274.6	-0.06210988	274.6	-0.06636702
274.8	1.245399	274.8	1.152072	274.8	1.1627	274.8	1.137849	274.8	1.063831	274.8	1.143644	274.8	1.156451	274.8	-0.1097456	274.8	-0.08635022	274.8	-0.141913	274.8	-0.08601324	274.8	-0.06329118	274.8	-0.1112173	274.8	-0.06526083	274.8	-0.05724647	274.8	-0.06797188
275	1.246544	275	1.150194	275	1.158129	275	1.143496	275	1.065981	275	1.143326	275	1.152428	275	-0.1051359	275	-0.08973124	275	-0.1442372	275	-0.08458229	275	-0.06395614	275	-0.1115803	275	-0.06921025	275	-0.05897053	275	-0.06480209
275.2	1.247346	275.2	1.15484	275.2	1.160332	275.2	1.14442	275.2	1.067281	275.2	1.14448	275.2	1.157587	275.2	-0.108588	275.2	-0.08672272	275.2	-0.1405814	275.2	-0.08746576	275.2	-0.0629376	275.2	-0.1132661	275.2	-0.06566833	275.2	-0.0578407	275.2	-0.0644655
275.4	1.248732	275.4	1.157736	275.4	1.159286	275.4	1.144164	275.4	1.062151	275.4	1.145432	275.4	1.150465	275.4	-0.1048059	275.4	-0.08375434	275.4	-0.1463427	275.4	-0.08188074	275.4	-0.06259283	275.4	-0.1100004	275.4	-0.06832826	275.4	-0.05958192	275.4	-0.06641401
275.6	1.249817	275.6	1.149859	275.6	1.159347	275.6	1.144162	275.6	1.058982	275.6	1.14389	275.6	1.155687	275.6	-0.1085289	275.6	-0.08565164	275.6	-0.1419816	275.6	-0.08381967	275.6	-0.0629957	275.6	-0.1101364	275.6	-0.06267254	275.6	-0.0642157	275.6	-0.06477664
275.8	1.245998	275.8	1.150294	275.8	1.159063	275.8	1.140737	275.8	1.0633	275.8	1.15011	275.8	1.157954	275.8	-0.1065063	275.8	-0.08640664	275.8	-0.1433696	275.8	-0.08344803	275.8	-0.06529762	275.8	-0.1091575	275.8	-0.06454018	275.8	-0.06221013	275.8	-0.06390861
276	1.2512	276	1.153642	276	1.159422	276	1.145803	276	1.064117	276	1.147502	276	1.15574	276	-0.1096749	276	-0.08189728	276	-0.1410264	276	-0.08530123	276	-0.0615158	276	-0.1105997	276	-0.06374769	276	-0.05973016	276	-0.06481139
276.2	1.250496	276.2	1.152942	276.2	1.162777	276.2	1.14456	276.2	1.062345	276.2	1.144543	276.2	1.157411	276.2	-0.1036206	276.2	-0.08801939	276.2	-0.1444012	276.2	-0.08576946	276.2	-0.06248858	276.2	-0.1112053	276.2	-0.06765248	276.2	-0.0568371	276.2	-0.06415433
276.4	1.251779	276.4	1.150666	276.4	1.160715	276.4	1.146074	276.4	1.064197	276.4	1.150718	276.4	1.153359	276.4	-0.1066522	276.4	-0.08736302	276.4	-0.1400045	276.4	-0.08251457	276.4	-0.06583906	276.4	-0.1059231	276.4	-0.05990613	276.4	-0.06231759	276.4	-0.06151963
276.6	1.24824	276.6	1.155716	276.6	1.16727	276.6	1.143864	276.6	1.063456	276.6	1.146034	276.6	1.152969	276.6	-0.1053323	276.6	-0.08719303	276.6	-0.1428732	276.6	-0.08729131	276.6	-0.06309399	276.6	-0.1087497	276.6	-0.05844404	276.6	-0.05852424	276.6	-0.06919593
276.8	1.249189	276.8	1.156267	276.8	1.157916	276.8	1.14463	276.8	1.065265	276.8	1.148567	276.8	1.156932	276.8	-0.1110329	276.8	-0.08679289	276.8	-0.143114	276.8	-0.08534106	276.8	-0.06471424	276.8	-0.1074045	276.8	-0.0585972	276.8	-0.05992718	276.8	-0.06649484
277	1.25194	277	1.155097	277	1.160637	277	1.148496	277	1.065733	277	1.15137	277	1.161348	277	-0.1109753	277	-0.08644452	277	-0.1437236	277	-0.09196927	277	-0.06791107	277	-0.101846	277	-0.06261694	277	-0.05869807	277	-0.06602606
277.2	1.248425	277.2	1.160416	277.2	1.161773	277.2	1.148163	277.2	1.064142	277.2	1.145265	277.2	1.158875	277.2	-0.1072222	277.2	-0.08641339	277.2	-0.1446058	277.2	-0.08337253	277.2	-0.06743405	277.2	-0.1080925	277.2	-0.06075679	277.2	-0.06086727	277.2	-0.06178878
277.4	1.253868	277.4	1.152944	277.4	1.163861	277.4	1.143374	277.4	1.066664	277.4	1.151999	277.4	1.155681	277.4	-0.1073866	277.4	-0.08370395	277.4	-0.1421417	277.4	-0.08438255	277.4	-0.06121434	277.4	-0.1063723	277.4	-0.06356102	277.4	-0.05717524	277.4	-0.05989889
277.6	1.251027	277.6	1.15853	277.6	1.161913	277.6	1.147296	277.6	1.063621	277.6	1.147058	277.6	1.158872	277.6	-0.1052707	277.6	-0.08431879	277.6	-0.1449584	277.6	-0.08826477	277.6	-0.06398519	277.6	-0.1136741	277.6	-0.0629653	277.6	-0.05604109	277.6	-0.06539957
277.8	1.251009	277.8	1.156526	277.8	1.167339	277.8	1.143164	277.8	1.068614	277.8	1.144877	277.8	1.165093	277.8	-0.1095753	277.8	-0.08558785	277.8	-0.1425577	277.8	-0.08347423	277.8	-0.06678335	277.8	-0.1112429	277.8	-0.06172515	277.8	-0.05876745	277.8	-0.0605586
278	1.250803	278	1.160586	278	1.163045	278	1.146436	278	1.063318	278	1.146496	278	1.155988	278	-0.1033415	278	-0.08440781	278	-0.1432676	278	-0.08348202	278	-0.06117061	278	-0.1079531	278	-0.06413227	278	-0.0559154	278	-0.06664534
278.2	1.24732	278.2	1.15674	278.2	1.163776	278.2	1.146422	278.2	1.06536	278.2	1.150258	278.2	1.160697	278.2	-0.1116197	278.2	-0.08740289	278.2	-0.1429042	278.2	-0.08665174	278.2	-0.06752685	278.2	-0.1072813	278.2	-0.06157982	278.2	-0.06415998	278.2	-0.06624661
278.4	1.251715	278.4	1.153901	278.4	1.165918	278.4	1.143856	278.4	1.063392	278.4	1.146608	278.4	1.160208	278.4	-0.1062616	278.4	-0.08603376	278.4	-0.1449745	278.4	-0.08630893	278.4	-0.06522691	278.4	-0.1106264	278.4	-0.06623878	278.4	-0.05585343	278.4	-0.06419738
278.6	1.25311	278.6	1.159581	278.6	1.162675	278.6	1.139358	278.6	1.063376	278.6	1.149124	278.6	1.154727	278.6	-0.1073513	278.6	-0.08793639	278.6	-0.137194	278.6	-0.08389796	278.6	-0.06611595	278.6	-0.1097987	278.6	-0.06352922	278.6	-0.06137024	278.6	-0.06138453
278.8	1.258355	278.8	1.150476	278.8	1.16097	278.8	1.142535	278.8	1.06681	278.8	1.149187	278.8	1.1542	278.8	-0.1061389	278.8	-0.08565966	278.8	-0.1403733	278.8	-0.08266705	278.8	-0.05870886	278.8	-0.106716	278.8	-0.06210404	278.8	-0.0581086	278.8	-0.06285482
279	1.252087	279	1.158093	279	1.164161	279	1.144221	279	1.064512	279	1.146802	279	1.155457	279	-0.1101853	279	-0.08623669	279	-0.1437996	279	-0.08727081	279	-0.06275432	279	-0.1102314	279	-0.05829467	279	-0.05582277	279	-0.06148835
279.2	1.257467	279.2	1.159799	279.2	1.160609	279.2	1.145971	279.2	1.063417	279.2	1.14738	279.2	1.16041	279.2	-0.1041433	279.2	-0.08724627	279.2	-0.1416722	279.2	-0.07949482	279.2	-0.06355657	279.2	-0.1061111	279.2	-0.05903839	279.2	-0.05850444	279.2	-0.06545027
279.4	1.253761	279.4	1.158775	279.4	1.163735	279.4	1.145432	279.4	1.061837	279.4	1.149066	279.4	1.157312	279.4	-0.1056636	279.4	-0.08282976	279.4	-0.144128	279.4	-0.08353162	279.4	-0.06171318	279.4	-0.1106318	279.4	-0.06195626	279.4	-0.0602062	279.4	-0.06498583
279.6	1.25044	279.6	1.160991	279.6	1.16493	279.6	1.142964	279.6	1.064986	279.6	1.148096	279.6	1.155918	279.6	-0.1060679	279.6	-0.08371356	279.6	-0.1399314	279.6	-0.08127207	279.6	-0.06236793	279.6	-0.1099722	279.6	-0.06378699	279.6	-0.05552374	279.6	-0.06381688
279.8	1.254722	279.8	1.15819	279.8	1.161353	279.8	1.144963	279.8	1.066762	279.8	1.149982	279.8	1.156642	279.8	-0.109573	279.8	-0.0848793	279.8	-0.1412923	279.8	-0.08506612	279.8	-0.06722289	279.8	-0.10871	279.8	-0.06238586	279.8	-0.05397123	279.8	-0.06085025
280	1.253447	280	1.156985	280	1.16157	280	1.145389	280	1.063351	280	1.143106	280	1.158019	280	-0.1064145	280	-0.0837446	280	-0.1437108	280	-0.08410667	280	-0.05420624	280	-0.1114776	280	-0.06296717	280	-0.05838207	280	-0.06621838
280.2	1.251191	280.2	1.157099	280.2	1.166969	280.2	1.147513	280.2	1.068244	280.2	1.149075	280.2	1.156462	280.2	-0.1066592	280.2	-0.08097355	280.2	-0.1416846	280.2	-0.08334911	280.2	-0.05822621	280.2	-0.1078571	280.2	-0.06089237	280.2	-0.06030309	280.2	-0.06723803
280.4	1.254287	280.4	1.161431	280.4	1.165003	280.4	1.145355	280.4	1.067882	280.4	1.153018	280.4	1.159719	280.4	-0.1039099	280.4	-0.08521614	280.4	-0.1424129	280.4	-0.0864796	280.4	-0.06070423	280.4	-0.1049196	280.4	-0.06032687	280.4	-0.05768931	280.4	-0.0643646
280.6	1.255536	280.6	1.158171	280.6	1.166806	280.6	1.14672	280.6	1.059412	280.6	1.149485	280.6	1.15823	280.6	-0.1084103	280.6	-0.08596815	280.6	-0.1464557	280.6	-0.08484955	280.6	-0.06042002	280.6	-0.1053988	280.6	-0.05901506	280.6	-0.05821519	280.6	-0.05940204
280.8	1.252881	280.8	1.159497	280.8	1.162391	280.8	1.148023	280.8	1.06622	280.8	1.150508	280.8	1.161279	280.8	-0.1071232	280.8	-0.08244032	280.8	-0.1422327	280.8	-0.08343856	280.8	-0.0630843	280.8	-0.1114093	280.8	-0.06491109	280.8	-0.05722238	280.8	-0.06252187
281	1.2608	281	1.162459	281	1.168695	281	1.14718	281	1.06459	281	1.146606	281	1.157662	281	-0.1048084	281	-0.08314412	281	-0.1413449	281	-0.08392576	281	-0.06171354	281	-0.1117477	281	-0.06547561	281	-0.06108359	281	-0.067049
281.2	1.258761	281.2	1.159816	281.2	1.168635	281.2	1.144962	281.2	1.064147	281.2	1.148046	281.2	1.160504	281.2	-0.1030479	281.2	-0.07778082	281.2	-0.1387812	281.2	-0.08749042	281.2	-0.06259357	281.2	-0.1092623	281.2	-0.06148467	281.2	-0.05814902	281.2	-0.06299146
281.4	1.254366	281.4	1.162994	281.4	1.161304	281.4	1.150253	281.4	1.067472	281.4	1.149485	281.4	1.15652	281.4	-0.1054086	281.4	-0.08891388	281.4	-0.1446708	281.4	-0.08073148	281.4	-0.06414326	281.4	-0.1034792	281.4	-0.06054013	281.4	-0.05337802	281.4	-0.06425738
281.6	1.260221	281.6	1.162428	281.6	1.167979	281.6	1.146436	281.6	1.066887	281.6	1.151429	281.6	1.163858	281.6	-0.1050769	281.6	-0.08333346	281.6	-0.1407671	281.6	-0.08445781	281.6	-0.05921869	281.6	-0.1082836	281.6	-0.0632219	281.6	-0.05557857	281.6	-0.06314211
281.8	1.260037	281.8	1.163772	281.8	1.162164	281.8	1.146561	281.8	1.066215	281.8	1.151472	281.8	1.158468	281.8	-0.1040634	281.8	-0.08742908	281.8	-0.1418601	281.8	-0.08454946	281.8	-0.06430849	281.8	-0.1044162	281.8	-0.06279804	281.8	-0.05684529	281.8	-0.06250675
282	1.26274	282	1.158851	282	1.168199	282	1.152058	282	1.069494	282	1.153723	282	1.154796	282	-0.1052128	282	-0.08054213	282	-0.1410137	282	-0.08220694	282	-0.06383105	282	-0.1066568	282	-0.06082501	282	-0.05392079	282	-0.0607746
282.2	1.258112	282.2	1.157942	282.2	1.167257	282.2	1.148573	282.2	1.067604	282.2	1.150123	282.2	1.159668	282.2	-0.1023166	282.2	-0.08196253	282.2	-0.1387797	282.2	-0.08219773	282.2	-0.06100888	282.2	-0.1097374	282.2	-0.06385027	282.2	-0.05690234	282.2	-0.06286366
282.4	1.256418	282.4	1.164889	282.4	1.167158	282.4	1.150708	282.4	1.064839	282.4	1.145208	282.4	1.15828	282.4	-0.1057645	282.4	-0.08000699	282.4	-0.1418456	282.4	-0.0805952	282.4	-0.06396872	282.4	-0.1067843	282.4	-0.05963695	282.4	-0.0597743	282.4	-0.06113463
282.6	1.257349	282.6	1.158688	282.6	1.168701	282.6	1.150564	282.6	1.064824	282.6	1.15195	282.6	1.152467	282.6	-0.1042145	282.6	-0.08134742	282.6	-0.1401927	282.6	-0.08125836	282.6	-0.0617111	282.6	-0.1096796	282.6	-0.06163343	282.6	-0.05701928	282.6	-0.06105664
282.8	1.258267	282.8	1.163596	282.8	1.166191	282.8	1.148908	282.8	1.070014	282.8	1.148802	282.8	1.157692	282.8	-0.1069426	282.8	-0.08011557	282.8	-0.1401334	282.8	-0.07783586	282.8	-0.06054616	282.8	-0.1076421	282.8	-0.05976596	282.8	-0.05672514	282.8	-0.06141489
283	1.257264	283	1.166755	283	1.170189	283	1.150679	283	1.066496	283	1.149158	283	1.161505	283	-0.1047863	283	-0.08431137	283	-0.1396955	283	-0.07953089	283	-0.06074832	283	-0.1072577	283	-0.06181793	283	-0.05438542	283	-0.06255754
283.2	1.257198	283.2	1.167344	283.2	1.16546	283.2	1.149536	283.2	1.064587	283.2	1.148187	283.2	1.162482	283.2	-0.1030732	283.2	-0.08387344	283.2	-0.14092	283.2	-0.0789049	283.2	-0.06004298	283.2	-0.1045563	283.2	-0.06026182	283.2	-0.05644913	283.2	-0.06192856
283.4	1.257221	283.4	1.163402	283.4	1.164265	283.4	1.150125	283.4	1.070665	283.4	1.146693	283.4	1.158738	283.4	-0.1053721	283.4	-0.08160555	283.4	-0.1386074	283.4	-0.08242271	283.4	-0.06042466	283.4	-0.1037158	283.4	-0.0564106	283.4	-0.05126317	283.4	-0.0630334
283.6	1.255065	283.6	1.158049	283.6	1.165542	283.6	1.151302	283.6	1.064365	283.6	1.146638	283.6	1.163683	283.6	-0.1044762	283.6	-0.08556169	283.6	-0.1405537	283.6	-0.07930743	283.6	-0.06010367	283.6	-0.1075805	283.6	-0.06163283	283.6	-0.05567928	283.6	-0.06124949
283.8	1.260548	283.8	1.160264	283.8	1.166427	283.8	1.14936	283.8	1.07265	283.8	1.154548	283.8	1.155908	283.8	-0.1083692	283.8	-0.08235148	283.8	-0.1385906	283.8	-0.07622957	283.8	-0.05909391	283.8	-0.1052252	283.8	-0.05805297	283.8	-0.05859866	283.8	-0.06436082
284	1.255251	284	1.163909	284	1.162748	284	1.153646	284	1.066396	284	1.151248	284	1.158771	284	-0.1056525	284	-0.08274765	284	-0.1443177	284	-0.08634291	284	-0.05625641	284	-0.1078516	284	-0.05776281	284	-0.05625908	284	-0.0605881
284.2	1.259298	284.2	1.160783	284.2	1.166059	284.2	1.14865	284.2	1.067589	284.2	1.149343	284.2	1.159596	284.2	-0.1015662	284.2	-0.08035129	284.2	-0.1417622	284.2	-0.08064103	284.2	-0.05633165	284.2	-0.1081769	284.2	-0.05545481	284.2	-0.0538773	284.2	-0.05747667
284.4	1.258691	284.4	1.1643	284.4	1.168932	284.4	1.151867	284.4	1.065297	284.4	1.151567	284.4	1.159955	284.4	-0.1072652	284.4	-0.08261961	284.4	-0.1425057	284.4	-0.07711839	284.4	-0.05896879	284.4	-0.1074541	284.4	-0.05536139	284.4	-0.05733708	284.4	-0.06452106
284.6	1.25611	284.6	1.1649	284.6	1.173825	284.6	1.153313	284.6	1.073707	284.6	1.147054	284.6	1.160942	284.6	-0.09995719	284.6	-0.08312993	284.6	-0.1382611	284.6	-0.08450074	284.6	-0.06049344	284.6	-0.1090595	284.6	-0.05734785	284.6	-0.05637935	284.6	-0.0592061
284.8	1.266175	284.8	1.169206	284.8	1.173077	284.8	1.150736	284.8	1.065182	284.8	1.148051	284.8	1.158234	284.8	-0.1047608	284.8	-0.08253644	284.8	-0.1389922	284.8	-0.07854357	284.8	-0.05918637	284.8	-0.1022737	284.8	-0.06339224	284.8	-0.05364877	284.8	-0.06082967
285	1.259071	285	1.165469	285	1.167553	285	1.149345	285	1.068273	285	1.151603	285	1.15991	285	-0.106097	285	-0.08082397	285	-0.1378026	285	-0.08396576	285	-0.05643379	285	-0.109436	285	-0.0574671	285	-0.06037921	285	-0.06414507
285.2	1.257891	285.2	1.168782	285.2	1.16826	285.2	1.15156	285.2	1.06786	285.2	1.152766	285.2	1.157458	285.2	-0.1020452	285.2	-0.08000196	285.2	-0.1391666	285.2	-0.08223043	285.2	-0.0608719	285.2	-0.1034745	285.2	-0.06028266	285.2	-0.05724978	285.2	-0.0618048
285.4	1.259655	285.4	1.166952	285.4	1.172337	285.4	1.152465	285.4	1.07256	285.4	1.155164	285.4	1.156856	285.4	-0.1052451	285.4	-0.08132131	285.4	-0.1426328	285.4	-0.08368651	285.4	-0.06310238	285.4	-0.1047547	285.4	-0.06089051	285.4	-0.05749429	285.4	-0.06098695
285.6	1.264802	285.6	1.165696	285.6	1.168556	285.6	1.156541	285.6	1.06575	285.6	1.15406	285.6	1.161269	285.6	-0.1057316	285.6	-0.08588793	285.6	-0.1411646	285.6	-0.08360874	285.6	-0.06314823	285.6	-0.1045509	285.6	-0.05769827	285.6	-0.05812659	285.6	-0.06190109
285.8	1.263853	285.8	1.16925	285.8	1.16946	285.8	1.149916	285.8	1.070246	285.8	1.150532	285.8	1.160667	285.8	-0.09961185	285.8	-0.08181546	285.8	-0.1412779	285.8	-0.08179545	285.8	-0.05461292	285.8	-0.1055947	285.8	-0.05836955	285.8	-0.05298776	285.8	-0.06066164
286	1.259498	286	1.16364	286	1.169898	286	1.150793	286	1.071441	286	1.15086	286	1.16028	286	-0.1106857	286	-0.08020788	286	-0.140378	286	-0.07934232	286	-0.06053352	286	-0.1025942	286	-0.06135476	286	-0.05630768	286	-0.05772642
286.2	1.264149	286.2	1.170758	286.2	1.170647	286.2	1.148614	286.2	1.077108	286.2	1.148616	286.2	1.163164	286.2	-0.1048528	286.2	-0.08154456	286.2	-0.1324376	286.2	-0.07748231	286.2	-0.05854481	286.2	-0.1076176	286.2	-0.0602367	286.2	-0.05253942	286.2	-0.06013753
286.4	1.265258	286.4	1.168336	286.4	1.165803	286.4	1.149198	286.4	1.065197	286.4	1.149324	286.4	1.161939	286.4	-0.1036829	286.4	-0.07975896	286.4	-0.1439637	286.4	-0.08184008	286.4	-0.05990728	286.4	-0.1033983	286.4	-0.06264567	286.4	-0.05563204	286.4	-0.06123945
286.6	1.267191	286.6	1.163948	286.6	1.170269	286.6	1.152661	286.6	1.069297	286.6	1.148244	286.6	1.159074	286.6	-0.1047207	286.6	-0.08081555	286.6	-0.1387011	286.6	-0.07846065	286.6	-0.0589812	286.6	-0.109696	286.6	-0.06024902	286.6	-0.05203314	286.6	-0.06257717
286.8	1.262876	286.8	1.162433	286.8	1.170345	286.8	1.148404	286.8	1.067235	286.8	1.152378	286.8	1.161548	286.8	-0.1040252	286.8	-0.07727066	286.8	-0.1405165	286.8	-0.08465464	286.8	-0.05472353	286.8	-0.1045459	286.8	-0.05757692	286.8	-0.05727742	286.8	-0.05776509
287	1.265305	287	1.169881	287	1.170741	287	1.148473	287	1.072674	287	1.153202	287	1.159014	287	-0.1053776	287	-0.084048	287	-0.1418715	287	-0.07782786	287	-0.05877266	287	-0.1057698	287	-0.05904699	287	-0.05509116	287	-0.06023489
287.2	1.265413	287.2	1.165503	287.2	1.171597	287.2	1.151784	287.2	1.076964	287.2	1.151844	287.2	1.161065	287.2	-0.1031614	287.2	-0.08311519	287.2	-0.1382862	287.2	-0.07802823	287.2	-0.05592912	287.2	-0.109627	287.2	-0.05747754	287.2	-0.05126144	287.2	-0.0580585
287.4	1.263211	287.4	1.168715	287.4	1.169271	287.4	1.152765	287.4	1.066827	287.4	1.149114	287.4	1.159485	287.4	-0.1029849	287.4	-0.08212999	287.4	-0.1361983	287.4	-0.07722689	287.4	-0.05815658	287.4	-0.1050502	287.4	-0.0590873	287.4	-0.0551869	287.4	-0.05900257
287.6	1.266367	287.6	1.170585	287.6	1.173019	287.6	1.151771	287.6	1.073372	287.6	1.152211	287.6	1.157475	287.6	-0.1079176	287.6	-0.08464536	287.6	-0.1405313	287.6	-0.08038741	287.6	-0.06105103	287.6	-0.1066891	287.6	-0.05882029	287.6	-0.06064902	287.6	-0.06136419
287.8	1.261454	287.8	1.168642	287.8	1.163972	287.8	1.149731	287.8	1.072125	287.8	1.151771	287.8	1.162151	287.8	-0.1059891	287.8	-0.0761555	287.8	-0.1406565	287.8	-0.08090021	287.8	-0.05517397	287.8	-0.1054489	287.8	-0.06050146	287.8	-0.05401149	287.8	-0.06019943
288	1.266318	288	1.170448	288	1.171796	288	1.152653	288	1.068364	288	1.153153	288	1.158539	288	-0.1064883	288	-0.08286871	288	-0.1357348	288	-0.07752507	288	-0.06008765	288	-0.1043452	288	-0.05372827	288	-0.05329884	288	-0.06285454
288.2	1.268536	288.2	1.164443	288.2	1.173731	288.2	1.146619	288.2	1.072258	288.2	1.150224	288.2	1.163325	288.2	-0.1025192	288.2	-0.0804679	288.2	-0.137751	288.2	-0.08179567	288.2	-0.05834697	288.2	-0.1027173	288.2	-0.05933635	288.2	-0.05308169	288.2	-0.06103298
288.4	1.266343	288.4	1.167225	288.4	1.171708	288.4	1.154833	288.4	1.072525	288.4	1.150935	288.4	1.167205	288.4	-0.1107997	288.4	-0.08452932	288.4	-0.1395387	288.4	-0.07899079	288.4	-0.05890467	288.4	-0.1032773	288.4	-0.06258921	288.4	-0.0514721	288.4	-0.05951516
288.6	1.266551	288.6	1.16501	288.6	1.176096	288.6	1.151396	288.6	1.07189	288.6	1.151695	288.6	1.160437	288.6	-0.1055872	288.6	-0.07620613	288.6	-0.1367165	288.6	-0.08376275	288.6	-0.06118428	288.6	-0.1019764	288.6	-0.05844566	288.6	-0.05443477	288.6	-0.06046616
288.8	1.266644	288.8	1.170045	288.8	1.174458	288.8	1.15569	288.8	1.069674	288.8	1.152472	288.8	1.16185	288.8	-0.1023208	288.8	-0.07946491	288.8	-0.136545	288.8	-0.07914194	288.8	-0.05638343	288.8	-0.1019092	288.8	-0.05836624	288.8	-0.05303001	288.8	-0.06049849
289	1.265053	289	1.166844	289	1.171702	289	1.150154	289	1.076166	289	1.149141	289	1.165015	289	-0.09873824	289	-0.07981564	289	-0.1348815	289	-0.08297509	289	-0.05395223	289	-0.1024786	289	-0.0578877	289	-0.05345823	289	-0.05803706
289.2	1.267673	289.2	1.168494	289.2	1.17499	289.2	1.156661	289.2	1.071275	289.2	1.151557	289.2	1.161773	289.2	-0.1062181	289.2	-0.08158297	289.2	-0.1383001	289.2	-0.07984762	289.2	-0.05700896	289.2	-0.1063898	289.2	-0.0569113	289.2	-0.05366674	289.2	-0.05736623
289.4	1.268668	289.4	1.170402	289.4	1.17547	289.4	1.152038	289.4	1.071285	289.4	1.150545	289.4	1.162217	289.4	-0.1011742	289.4	-0.08223176	289.4	-0.135456	289.4	-0.08238969	289.4	-0.05532688	289.4	-0.1086024	289.4	-0.05690511	289.4	-0.05469249	289.4	-0.06052251
289.6	1.265488	289.6	1.167862	289.6	1.171159	289.6	1.157028	289.6	1.075101	289.6	1.151641	289.6	1.16152	289.6	-0.1054935	289.6	-0.07916559	289.6	-0.1394154	289.6	-0.0824948	289.6	-0.05569072	289.6	-0.1032428	289.6	-0.06000607	289.6	-0.05438537	289.6	-0.05717786
289.8	1.268997	289.8	1.170619	289.8	1.170934	289.8	1.155253	289.8	1.070966	289.8	1.155694	289.8	1.163219	289.8	-0.1034333	289.8	-0.07806277	289.8	-0.1377181	289.8	-0.08161106	289.8	-0.05432061	289.8	-0.1037026	289.8	-0.05441897	289.8	-0.04888952	289.8	-0.06332698
290	1.268817	290	1.170582	290	1.170317	290	1.153921	290	1.073237	290	1.155682	290	1.166121	290	-0.1070003	290	-0.08007612	290	-0.1362676	290	-0.07907117	290	-0.05570444	290	-0.1072642	290	-0.05913959	290	-0.05549934	290	-0.05807609
290.2	1.265779	290.2	1.16484	290.2	1.173452	290.2	1.151744	290.2	1.073608	290.2	1.153829	290.2	1.162393	290.2	-0.101361	290.2	-0.07624213	290.2	-0.1355627	290.2	-0.07714878	290.2	-0.05680286	290.2	-0.1070336	290.2	-0.05609776	290.2	-0.05162061	290.2	-0.06003093
290.4	1.269103	290.4	1.168743	290.4	1.172108	290.4	1.155169	290.4	1.068617	290.4	1.157601	290.4	1.165477	290.4	-0.1024996	290.4	-0.08069055	290.4	-0.1385529	290.4	-0.07863167	290.4	-0.0515817	290.4	-0.1034296	290.4	-0.05364548	290.4	-0.0494668	290.4	-0.05655817
290.6	1.267594	290.6	1.169434	290.6	1.176524	290.6	1.155722	290.6	1.067412	290.6	1.156276	290.6	1.162916	290.6	-0.102747	290.6	-0.08575613	290.6	-0.1395026	290.6	-0.07995207	290.6	-0.05450751	290.6	-0.1055746	290.6	-0.05765139	290.6	-0.05464673	290.6	-0.05978865
290.8	1.269056	290.8	1.167369	290.8	1.175078	290.8	1.157989	290.8	1.06821	290.8	1.153081	290.8	1.16187	290.8	-0.1034884	290.8	-0.08166552	290.8	-0.1394374	290.8	-0.07969856	290.8	-0.05450065	290.8	-0.101275	290.8	-0.05323064	290.8	-0.05240474	290.8	-0.06106168
291	1.271525	291	1.174412	291	1.171741	291	1.154558	291	1.069193	291	1.154339	291	1.165114	291	-0.09906653	291	-0.07771962	291	-0.1400158	291	-0.07721155	291	-0.05457324	291	-0.1069595	291	-0.05574524	291	-0.05126033	291	-0.05540825
291.2	1.271669	291.2	1.169772	291.2	1.17595	291.2	1.154454	291.2	1.074571	291.2	1.150234	291.2	1.156615	291.2	-0.1016482	291.2	-0.08252861	291.2	-0.1330957	291.2	-0.07840386	291.2	-0.05281381	291.2	-0.1000874	291.2	-0.06282167	291.2	-0.05384808	291.2	-0.06222653
291.4	1.270967	291.4	1.17015	291.4	1.174565	291.4	1.153716	291.4	1.075496	291.4	1.154706	291.4	1.160963	291.4	-0.1030453	291.4	-0.07653809	291.4	-0.1387427	291.4	-0.07799178	291.4	-0.05588056	291.4	-0.1021827	291.4	-0.05925617	291.4	-0.04539744	291.4	-0.06101846
291.6	1.267067	291.6	1.170423	291.6	1.174803	291.6	1.154132	291.6	1.07522	291.6	1.152644	291.6	1.161892	291.6	-0.1046447	291.6	-0.07870261	291.6	-0.1366916	291.6	-0.07556435	291.6	-0.0629862	291.6	-0.1024717	291.6	-0.05686163	291.6	-0.05336309	291.6	-0.05477515
291.8	1.270304	291.8	1.169833	291.8	1.178271	291.8	1.157337	291.8	1.073725	291.8	1.159184	291.8	1.160159	291.8	-0.09974087	291.8	-0.08321663	291.8	-0.1348191	291.8	-0.08085833	291.8	-0.05568915	291.8	-0.1001356	291.8	-0.05446022	291.8	-0.05165644	291.8	-0.05544931
292	1.267279	292	1.174787	292	1.182135	292	1.149905	292	1.075003	292	1.153294	292	1.165324	292	-0.1026258	292	-0.07844708	292	-0.1372038	292	-0.07620022	292	-0.05597249	292	-0.1030116	292	-0.05749791	292	-0.06098861	292	-0.06325959
292.2	1.273905	292.2	1.174013	292.2	1.180961	292.2	1.152666	292.2	1.070202	292.2	1.156848	292.2	1.164904	292.2	-0.1038376	292.2	-0.07466484	292.2	-0.1423616	292.2	-0.08243971	292.2	-0.05987196	292.2	-0.1059003	292.2	-0.05444964	292.2	-0.0524635	292.2	-0.05903365
292.4	1.27024	292.4	1.177009	292.4	1.180283	292.4	1.15047	292.4	1.070266	292.4	1.156268	292.4	1.163811	292.4	-0.101792	292.4	-0.08216699	292.4	-0.1400259	292.4	-0.07848696	292.4	-0.05463878	292.4	-0.1041989	292.4	-0.05646292	292.4	-0.05504761	292.4	-0.0601668
292.6	1.273833	292.6	1.174611	292.6	1.178849	292.6	1.153776	292.6	1.071888	292.6	1.156631	292.6	1.16513	292.6	-0.1003827	292.6	-0.07919214	292.6	-0.1356325	292.6	-0.08244861	292.6	-0.05406358	292.6	-0.1009717	292.6	-0.05351131	292.6	-0.047459	292.6	-0.05834925
292.8	1.268651	292.8	1.173399	292.8	1.172715	292.8	1.151094	292.8	1.07134	292.8	1.155806	292.8	1.161686	292.8	-0.09646254	292.8	-0.07953359	292.8	-0.1388603	292.8	-0.07951526	292.8	-0.05364021	292.8	-0.1044375	292.8	-0.05857779	292.8	-0.049061	292.8	-0.05433279
293	1.276164	293	1.170246	293	1.177047	293	1.153509	293	1.072401	293	1.155548	293	1.166883	293	-0.1011118	293	-0.07990138	293	-0.1379894	293	-0.0785132	293	-0.05841769	293	-0.1032441	293	-0.05306155	293	-0.05245462	293	-0.05937068
293.2	1.27064	293.2	1.172279	293.2	1.176095	293.2	1.158959	293.2	1.075373	293.2	1.15334	293.2	1.159723	293.2	-0.1031622	293.2	-0.07790033	293.2	-0.1396342	293.2	-0.08193573	293.2	-0.0558759	293.2	-0.1051535	293.2	-0.06021602	293.2	-0.0456709	293.2	-0.05732401
293.4	1.268216	293.4	1.176939	293.4	1.175798	293.4	1.160289	293.4	1.071539	293.4	1.156914	293.4	1.168071	293.4	-0.101327	293.4	-0.07918087	293.4	-0.1350657	293.4	-0.07269693	293.4	-0.05374809	293.4	-0.1040306	293.4	-0.06011556	293.4	-0.05332559	293.4	-0.06212381
293.6	1.274591	293.6	1.175713	293.6	1.175633	293.6	1.158328	293.6	1.076912	293.6	1.155413	293.6	1.157253	293.6	-0.09893005	293.6	-0.08136135	293.6	-0.139979	293.6	-0.0785856	293.6	-0.05724194	293.6	-0.09860654	293.6	-0.05680556	293.6	-0.05367929	293.6	-0.06061334
293.8	1.275014	293.8	1.172265	293.8	1.177506	293.8	1.158091	293.8	1.0741	293.8	1.154943	293.8	1.162513	293.8	-0.1000687	293.8	-0.08107252	293.8	-0.1385103	293.8	-0.07508542	293.8	-0.0566057	293.8	-0.1017697	293.8	-0.05337398	293.8	-0.05276812	293.8	-0.0570221
294	1.269941	294	1.176524	294	1.177154	294	1.158212	294	1.071302	294	1.152714	294	1.162019	294	-0.1000695	294	-0.077136	294	-0.1342987	294	-0.07670059	294	-0.0530535	294	-0.1033536	294	-0.05448939	294	-0.04596459	294	-0.06415732
294.2	1.277765	294.2	1.175643	294.2	1.175735	294.2	1.156706	294.2	1.075944	294.2	1.1557	294.2	1.162003	294.2	-0.101053	294.2	-0.07787736	294.2	-0.1388545	294.2	-0.07881146	294.2	-0.05087236	294.2	-0.1089901	294.2	-0.0557879	294.2	-0.04922205	294.2	-0.05649928
294.4	1.27443	294.4	1.176949	294.4	1.177718	294.4	1.158627	294.4	1.076542	294.4	1.159606	294.4	1.164307	294.4	-0.1015948	294.4	-0.07557196	294.4	-0.1403781	294.4	-0.07854673	294.4	-0.05698574	294.4	-0.1031454	294.4	-0.05480432	294.4	-0.05055701	294.4	-0.05780464
294.6	1.275739	294.6	1.174232	294.6	1.175628	294.6	1.1545	294.6	1.07425	294.6	1.153608	294.6	1.161655	294.6	-0.1005584	294.6	-0.07725647	294.6	-0.137752	294.6	-0.07944188	294.6	-0.05756682	294.6	-0.1003359	294.6	-0.05904747	294.6	-0.05206019	294.6	-0.05669939
294.8	1.272538	294.8	1.179045	294.8	1.177628	294.8	1.155578	294.8	1.072116	294.8	1.153021	294.8	1.166432	294.8	-0.0991767	294.8	-0.07891513	294.8	-0.1309171	294.8	-0.07538616	294.8	-0.05114886	294.8	-0.09970818	294.8	-0.05391015	294.8	-0.05019828	294.8	-0.0552338
295	1.271647	295	1.176195	295	1.178696	295	1.159907	295	1.075816	295	1.15429	295	1.168287	295	-0.0979808	295	-0.07644463	295	-0.1380788	295	-0.0751026	295	-0.05742459	295	-0.104229	295	-0.05571268	295	-0.04931454	295	-0.05947541
295.2	1.277137	295.2	1.175572	295.2	1.178211	295.2	1.158399	295.2	1.074741	295.2	1.159003	295.2	1.162781	295.2	-0.09899396	295.2	-0.0766331	295.2	-0.1386901	295.2	-0.07436989	295.2	-0.05302041	295.2	-0.1004179	295.2	-0.05726786	295.2	-0.05050977	295.2	-0.05376942
295.4	1.274344	295.4	1.178552	295.4	1.178191	295.4	1.154662	295.4	1.070951	295.4	1.156186	295.4	1.163344	295.4	-0.1011145	295.4	-0.07680047	295.4	-0.1368925	295.4	-0.07983384	295.4	-0.05839109	295.4	-0.1048077	295.4	-0.05565791	295.4	-0.05200219	295.4	-0.05890217
295.6	1.277394	295.6	1.178853	295.6	1.183849	295.6	1.161296	295.6	1.072987	295.6	1.154337	295.6	1.165595	295.6	-0.1000402	295.6	-0.07465828	295.6	-0.1322629	295.6	-0.07396977	295.6	-0.05284373	295.6	-0.1032356	295.6	-0.05750864	295.6	-0.05033578	295.6	-0.05660571
295.8	1.275995	295.8	1.180623	295.8	1.176811	295.8	1.15347	295.8	1.074191	295.8	1.156435	295.8	1.162732	295.8	-0.09852029	295.8	-0.07630763	295.8	-0.1392393	295.8	-0.07498673	295.8	-0.05369776	295.8	-0.1002465	295.8	-0.05818963	295.8	-0.05541513	295.8	-0.05764508
296	1.278367	296	1.180926	296	1.184602	296	1.15648	296	1.06914	296	1.15318	296	1.162574	296	-0.1024235	296	-0.07938433	296	-0.1361022	296	-0.07932982	296	-0.05448415	296	-0.09815788	296	-0.05405132	296	-0.05132925	296	-0.05871892
296.2	1.278321	296.2	1.175635	296.2	1.187032	296.2	1.158846	296.2	1.075149	296.2	1.155002	296.2	1.162878	296.2	-0.1007474	296.2	-0.07292364	296.2	-0.1350254	296.2	-0.07376054	296.2	-0.05283004	296.2	-0.1034732	296.2	-0.04974295	296.2	-0.04739547	296.2	-0.05521572
296.4	1.277953	296.4	1.180695	296.4	1.179829	296.4	1.159712	296.4	1.076414	296.4	1.160114	296.4	1.166328	296.4	-0.09850648	296.4	-0.07700142	296.4	-0.1352878	296.4	-0.07482852	296.4	-0.05340642	296.4	-0.1008226	296.4	-0.05551676	296.4	-0.05378517	296.4	-0.05997767
296.6	1.277945	296.6	1.178347	296.6	1.18186	296.6	1.160475	296.6	1.076303	296.6	1.155817	296.6	1.165074	296.6	-0.09949099	296.6	-0.07989018	296.6	-0.1354475	296.6	-0.0783147	296.6	-0.05234934	296.6	-0.09929789	296.6	-0.05250426	296.6	-0.05180328	296.6	-0.0538081
296.8	1.275172	296.8	1.176628	296.8	1.181454	296.8	1.160273	296.8	1.074692	296.8	1.159367	296.8	1.169495	296.8	-0.1052561	296.8	-0.07997405	296.8	-0.1313528	296.8	-0.07514368	296.8	-0.05277313	296.8	-0.1018339	296.8	-0.05562889	296.8	-0.05048397	296.8	-0.05697266
297	1.281581	297	1.177617	297	1.182715	297	1.159885	297	1.078167	297	1.153784	297	1.168644	297	-0.1019156	297	-0.07502224	297	-0.1351012	297	-0.0745284	297	-0.05835847	297	-0.1043055	297	-0.0529581	297	-0.0511245	297	-0.05226183
297.2	1.275808	297.2	1.181093	297.2	1.173281	297.2	1.162105	297.2	1.078054	297.2	1.158243	297.2	1.164915	297.2	-0.09673385	297.2	-0.07519162	297.2	-0.1311474	297.2	-0.07522101	297.2	-0.05575137	297.2	-0.09720907	297.2	-0.05459372	297.2	-0.05266182	297.2	-0.06029898
297.4	1.280631	297.4	1.173972	297.4	1.181641	297.4	1.158362	297.4	1.078179	297.4	1.159793	297.4	1.162529	297.4	-0.1036317	297.4	-0.07114574	297.4	-0.1433127	297.4	-0.07701365	297.4	-0.05433339	297.4	-0.09925038	297.4	-0.05374476	297.4	-0.05568374	297.4	-0.05522239
297.6	1.278673	297.6	1.177859	297.6	1.183456	297.6	1.158354	297.6	1.07876	297.6	1.156567	297.6	1.159509	297.6	-0.1010637	297.6	-0.07882835	297.6	-0.1347654	297.6	-0.07557353	297.6	-0.0539104	297.6	-0.1000025	297.6	-0.05270167	297.6	-0.05140234	297.6	-0.05468944
297.8	1.275864	297.8	1.178699	297.8	1.178137	297.8	1.161696	297.8	1.079575	297.8	1.154577	297.8	1.168424	297.8	-0.1010816	297.8	-0.07613774	297.8	-0.1341756	297.8	-0.07600494	297.8	-0.05553938	297.8	-0.09650314	297.8	-0.05546404	297.8	-0.04995066	297.8	-0.05743665
298	1.278172	298	1.178025	298	1.179612	298	1.161765	298	1.074994	298	1.156526	298	1.166263	298	-0.1019402	298	-0.0710756	298	-0.1388431	298	-0.07554298	298	-0.05399366	298	-0.1014201	298	-0.05209054	298	-0.05331725	298	-0.05760081
298.2	1.280244	298.2	1.177916	298.2	1.176502	298.2	1.160451	298.2	1.076151	298.2	1.160004	298.2	1.16632	298.2	-0.09969298	298.2	-0.07703569	298.2	-0.1342211	298.2	-0.07668328	298.2	-0.04992905	298.2	-0.09976905	298.2	-0.05570784	298.2	-0.051409	298.2	-0.05435652
298.4	1.282871	298.4	1.177947	298.4	1.175627	298.4	1.157298	298.4	1.078194	298.4	1.159032	298.4	1.168922	298.4	-0.09632488	298.4	-0.07951836	298.4	-0.1356083	298.4	-0.07093151	298.4	-0.05356702	298.4	-0.09818626	298.4	-0.05595025	298.4	-0.04961956	298.4	-0.05319204
298.6	1.27654	298.6	1.181153	298.6	1.182848	298.6	1.159152	298.6	1.078579	298.6	1.157167	298.6	1.165941	298.6	-0.1014521	298.6	-0.0748558	298.6	-0.1344228	298.6	-0.07423858	298.6	-0.05011958	298.6	-0.1024869	298.6	-0.05599921	298.6	-0.04708802	298.6	-0.06526782
298.8	1.278443	298.8	1.1802	298.8	1.179909	298.8	1.160182	298.8	1.073911	298.8	1.15765	298.8	1.16892	298.8	-0.09736289	298.8	-0.07689495	298.8	-0.1316891	298.8	-0.07212079	298.8	-0.05282722	298.8	-0.1040157	298.8	-0.05574146	298.8	-0.05002622	298.8	-0.05228299
299	1.280521	299	1.176745	299	1.181329	299	1.159845	299	1.078574	299	1.159366	299	1.166481	299	-0.09879079	299	-0.07565604	299	-0.1306709	299	-0.07373092	299	-0.05441398	299	-0.1002035	299	-0.04985704	299	-0.05164886	299	-0.05882334
299.2	1.280358	299.2	1.183224	299.2	1.18306	299.2	1.163052	299.2	1.075204	299.2	1.162372	299.2	1.166464	299.2	-0.09974051	299.2	-0.0726448	299.2	-0.13178	299.2	-0.07219593	299.2	-0.05194299	299.2	-0.09743262	299.2	-0.05406821	299.2	-0.04926902	299.2	-0.05800492
299.4	1.278555	299.4	1.179482	299.4	1.18541	299.4	1.160007	299.4	1.080589	299.4	1.159896	299.4	1.170555	299.4	-0.100215	299.4	-0.07719368	299.4	-0.1358725	299.4	-0.07352252	299.4	-0.0543055	299.4	-0.09932055	299.4	-0.05305152	299.4	-0.04639093	299.4	-0.05229223
299.6	1.281582	299.6	1.181414	299.6	1.181083	299.6	1.161115	299.6	1.07773	299.6	1.155974	299.6	1.167	299.6	-0.1033993	299.6	-0.07282768	299.6	-0.1303377	299.6	-0.07703895	299.6	-0.05315454	299.6	-0.1013646	299.6	-0.05455303	299.6	-0.0509811	299.6	-0.06218917
299.8	1.282781	299.8	1.178129	299.8	1.183	299.8	1.154435	299.8	1.07777	299.8	1.157523	299.8	1.169646	299.8	-0.09829482	299.8	-0.07162812	299.8	-0.1351787	299.8	-0.07737399	299.8	-0.05101389	299.8	-0.09945849	299.8	-0.05503862	299.8	-0.05092971	299.8	-0.05709755
300	1.280549	300	1.179465	300	1.182686	300	1.161151	300	1.073434	300	1.15788	300	1.166934	300	-0.1009493	300	-0.07609653	300	-0.1325358	300	-0.07851904	300	-0.05456213	300	-0.1011754	300	-0.05936819	300	-0.04609382	300	-0.05556875
300.2	1.278749	300.2	1.183447	300.2	1.185721	300.2	1.161272	300.2	1.076949	300.2	1.154425	300.2	1.162158	300.2	-0.09561928	300.2	-0.07170936	300.2	-0.1362375	300.2	-0.07823949	300.2	-0.05414928	300.2	-0.1013309	300.2	-0.05656272	300.2	-0.04890336	300.2	-0.0541153
300.4	1.278043	300.4	1.179559	300.4	1.181255	300.4	1.163084	300.4	1.079535	300.4	1.158864	300.4	1.162139	300.4	-0.1045256	300.4	-0.07921047	300.4	-0.1357408	300.4	-0.07403661	300.4	-0.0580238	300.4	-0.1048084	300.4	-0.0531791	300.4	-0.04818925	300.4	-0.05898462
300.6	1.283827	300.6	1.182783	300.6	1.184305	300.6	1.159206	300.6	1.07534	300.6	1.152127	300.6	1.168102	300.6	-0.09535239	300.6	-0.0754507	300.6	-0.1344466	300.6	-0.07494631	300.6	-0.05301699	300.6	-0.0998781	300.6	-0.04983115	300.6	-0.05277798	300.6	-0.0531216
300.8	1.281854	300.8	1.185141	300.8	1.182066	300.8	1.15988	300.8	1.078036	300.8	1.158984	300.8	1.167601	300.8	-0.09780003	300.8	-0.07190737	300.8	-0.1334021	300.8	-0.07791343	300.8	-0.0512259	300.8	-0.09737052	300.8	-0.05181178	300.8	-0.04735594	300.8	-0.05264762
301	1.279122	301	1.181312	301	1.181939	301	1.158376	301	1.078839	301	1.161448	301	1.169673	301	-0.09910782	301	-0.07195915	301	-0.131219	301	-0.0710987	301	-0.05067369	301	-0.1015933	301	-0.05375123	301	-0.048834	301	-0.05116354
301.2	1.28724	301.2	1.178772	301.2	1.180387	301.2	1.165213	301.2	1.074819	301.2	1.160556	301.2	1.169479	301.2	-0.09895562	301.2	-0.07800972	301.2	-0.134307	301.2	-0.07483235	301.2	-0.0529303	301.2	-0.09881853	301.2	-0.05017239	301.2	-0.04764913	301.2	-0.05584368
301.4	1.282165	301.4	1.181701	301.4	1.177699	301.4	1.162106	301.4	1.079069	301.4	1.158264	301.4	1.168298	301.4	-0.09491179	301.4	-0.07426485	301.4	-0.1319094	301.4	-0.07605488	301.4	-0.0484255	301.4	-0.09989018	301.4	-0.05121492	301.4	-0.04474969	301.4	-0.05710148
301.6	1.285836	301.6	1.184919	301.6	1.182354	301.6	1.161943	301.6	1.077618	301.6	1.158084	301.6	1.165192	301.6	-0.0963584	301.6	-0.07351519	301.6	-0.1323209	301.6	-0.07352054	301.6	-0.0483364	301.6	-0.09883931	301.6	-0.0564165	301.6	-0.04947103	301.6	-0.05783306
301.8	1.285635	301.8	1.183516	301.8	1.18199	301.8	1.160561	301.8	1.081888	301.8	1.158894	301.8	1.162206	301.8	-0.09780418	301.8	-0.07555339	301.8	-0.1288635	301.8	-0.07769033	301.8	-0.05561831	301.8	-0.1008052	301.8	-0.05369425	301.8	-0.04710266	301.8	-0.05528745
302	1.283082	302	1.177809	302	1.182289	302	1.160085	302	1.079863	302	1.159868	302	1.16447	302	-0.0968501	302	-0.07493553	302	-0.1318853	302	-0.07012737	302	-0.05135597	302	-0.1018341	302	-0.05472001	302	-0.04792343	302	-0.05327931
302.2	1.284126	302.2	1.180746	302.2	1.187041	302.2	1.162296	302.2	1.077482	302.2	1.161111	302.2	1.168721	302.2	-0.09777287	302.2	-0.07533043	302.2	-0.1301795	302.2	-0.07207185	302.2	-0.04964996	302.2	-0.1008644	302.2	-0.05235349	302.2	-0.04389731	302.2	-0.05592066
302.4	1.283258	302.4	1.185851	302.4	1.183997	302.4	1.162149	302.4	1.082473	302.4	1.161664	302.4	1.164131	302.4	-0.09739402	302.4	-0.07324602	302.4	-0.1305098	302.4	-0.07121939	302.4	-0.05166437	302.4	-0.09762821	302.4	-0.05313986	302.4	-0.05213861	302.4	-0.05594752
302.6	1.284951	302.6	1.182679	302.6	1.184135	302.6	1.163847	302.6	1.078854	302.6	1.161756	302.6	1.167437	302.6	-0.09578703	302.6	-0.07875139	302.6	-0.1322717	302.6	-0.07448325	302.6	-0.04888333	302.6	-0.1031336	302.6	-0.05322156	302.6	-0.04949699	302.6	-0.05929428
302.8	1.285814	302.8	1.186247	302.8	1.18512	302.8	1.153804	302.8	1.075729	302.8	1.160084	302.8	1.168887	302.8	-0.1003275	302.8	-0.07393286	302.8	-0.1333353	302.8	-0.07322776	302.8	-0.05149229	302.8	-0.1014	302.8	-0.05382356	302.8	-0.04776867	302.8	-0.05126711
303	1.284129	303	1.183445	303	1.181077	303	1.158877	303	1.074049	303	1.161966	303	1.167976	303	-0.09765627	303	-0.07638752	303	-0.1325539	303	-0.07149804	303	-0.05112072	303	-0.09612104	303	-0.05150582	303	-0.04759386	303	-0.05557976
303.2	1.286565	303.2	1.182923	303.2	1.188113	303.2	1.161279	303.2	1.080105	303.2	1.159555	303.2	1.167332	303.2	-0.09694009	303.2	-0.07573853	303.2	-0.1357788	303.2	-0.07683067	303.2	-0.04869934	303.2	-0.09888841	303.2	-0.05057554	303.2	-0.05055846	303.2	-0.05361322
303.4	1.284552	303.4	1.184668	303.4	1.191483	303.4	1.159284	303.4	1.081235	303.4	1.160791	303.4	1.168775	303.4	-0.09526925	303.4	-0.07759976	303.4	-0.1314581	303.4	-0.07090688	303.4	-0.05056782	303.4	-0.09895375	303.4	-0.05570172	303.4	-0.04693206	303.4	-0.05716935
303.6	1.283181	303.6	1.185122	303.6	1.185753	303.6	1.16105	303.6	1.082386	303.6	1.159445	303.6	1.167188	303.6	-0.1012251	303.6	-0.07383478	303.6	-0.1325635	303.6	-0.0740243	303.6	-0.05378533	303.6	-0.09869375	303.6	-0.0537117	303.6	-0.0525552	303.6	-0.05655261
303.8	1.288597	303.8	1.184403	303.8	1.184371	303.8	1.163856	303.8	1.077918	303.8	1.159297	303.8	1.164589	303.8	-0.09718708	303.8	-0.0706942	303.8	-0.1320064	303.8	-0.07068145	303.8	-0.05034498	303.8	-0.09659519	303.8	-0.05431386	303.8	-0.05126279	303.8	-0.05461773
304	1.281486	304	1.189457	304	1.187661	304	1.16395	304	1.076944	304	1.158146	304	1.164436	304	-0.09772959	304	-0.0740134	304	-0.1300956	304	-0.07087158	304	-0.05184232	304	-0.10013	304	-0.05368044	304	-0.04695333	304	-0.0554118
304.2	1.289569	304.2	1.185907	304.2	1.184288	304.2	1.159186	304.2	1.077934	304.2	1.158951	304.2	1.168746	304.2	-0.1009121	304.2	-0.07079749	304.2	-0.1333147	304.2	-0.07729226	304.2	-0.04998854	304.2	-0.09808508	304.2	-0.05362583	304.2	-0.04856366	304.2	-0.05261786
304.4	1.285397	304.4	1.189297	304.4	1.188136	304.4	1.160978	304.4	1.08051	304.4	1.16282	304.4	1.168848	304.4	-0.0997479	304.4	-0.07514561	304.4	-0.134414	304.4	-0.07150081	304.4	-0.04628291	304.4	-0.1041586	304.4	-0.05186344	304.4	-0.05247218	304.4	-0.05086343
304.6	1.287075	304.6	1.184964	304.6	1.185395	304.6	1.16497	304.6	1.077222	304.6	1.157991	304.6	1.168021	304.6	-0.09436611	304.6	-0.07915097	304.6	-0.135431	304.6	-0.07373737	304.6	-0.05157499	304.6	-0.1024693	304.6	-0.04934374	304.6	-0.04609381	304.6	-0.05440163
304.8	1.286455	304.8	1.188098	304.8	1.190747	304.8	1.165034	304.8	1.077305	304.8	1.158897	304.8	1.170377	304.8	-0.09496173	304.8	-0.07438496	304.8	-0.1316111	304.8	-0.07147749	304.8	-0.05369146	304.8	-0.101972	304.8	-0.05149558	304.8	-0.05046162	304.8	-0.05396216
305	1.285436	305	1.187485	305	1.188343	305	1.161393	305	1.07874	305	1.1613	305	1.167251	305	-0.09682187	305	-0.07830885	305	-0.130867	305	-0.06794915	305	-0.05653195	305	-0.0971903	305	-0.05256068	305	-0.04440169	305	-0.05055156
305.2	1.288156	305.2	1.186484	305.2	1.187304	305.2	1.162119	305.2	1.082913	305.2	1.162721	305.2	1.17233	305.2	-0.09964007	305.2	-0.07033776	305.2	-0.1305806	305.2	-0.07692434	305.2	-0.04780879	305.2	-0.09858492	305.2	-0.05127039	305.2	-0.04224247	305.2	-0.05470518
305.4	1.292529	305.4	1.185293	305.4	1.186249	305.4	1.163111	305.4	1.079637	305.4	1.16052	305.4	1.169315	305.4	-0.09691986	305.4	-0.07885295	305.4	-0.1294814	305.4	-0.07322277	305.4	-0.05027318	305.4	-0.09885209	305.4	-0.05208473	305.4	-0.04922537	305.4	-0.05431326
305.6	1.290241	305.6	1.187395	305.6	1.188366	305.6	1.166091	305.6	1.080493	305.6	1.16351	305.6	1.169818	305.6	-0.09706492	305.6	-0.07549676	305.6	-0.1351656	305.6	-0.06587687	305.6	-0.05030032	305.6	-0.09993853	305.6	-0.0539402	305.6	-0.04326313	305.6	-0.05350745
305.8	1.291224	305.8	1.18687	305.8	1.186517	305.8	1.165171	305.8	1.082454	305.8	1.163321	305.8	1.169266	305.8	-0.0984071	305.8	-0.0726051	305.8	-0.1320449	305.8	-0.07587094	305.8	-0.05200711	305.8	-0.0975226	305.8	-0.05413561	305.8	-0.04686582	305.8	-0.05426916
306	1.288444	306	1.185282	306	1.186136	306	1.167047	306	1.084324	306	1.166173	306	1.167748	306	-0.09625103	306	-0.07507051	306	-0.1300144	306	-0.07264587	306	-0.04658568	306	-0.0973109	306	-0.04738806	306	-0.04580649	306	-0.04880423
306.2	1.286584	306.2	1.189265	306.2	1.186345	306.2	1.166137	306.2	1.077632	306.2	1.162436	306.2	1.171334	306.2	-0.09808944	306.2	-0.07177655	306.2	-0.1316831	306.2	-0.06886892	306.2	-0.04968421	306.2	-0.097846	306.2	-0.05011341	306.2	-0.04911989	306.2	-0.05152136
306.4	1.291134	306.4	1.185338	306.4	1.185578	306.4	1.164665	306.4	1.081746	306.4	1.162483	306.4	1.17317	306.4	-0.09265712	306.4	-0.07238105	306.4	-0.1330093	306.4	-0.0745917	306.4	-0.04777635	306.4	-0.09694989	306.4	-0.05334923	306.4	-0.04640552	306.4	-0.04746319
306.6	1.286687	306.6	1.185081	306.6	1.187962	306.6	1.160597	306.6	1.079111	306.6	1.159197	306.6	1.168835	306.6	-0.09677585	306.6	-0.07470425	306.6	-0.133145	306.6	-0.07013374	306.6	-0.04941145	306.6	-0.09468195	306.6	-0.04987961	306.6	-0.03954893	306.6	-0.04865107
306.8	1.28811	306.8	1.189431	306.8	1.188508	306.8	1.168497	306.8	1.078724	306.8	1.160218	306.8	1.17222	306.8	-0.09728338	306.8	-0.06979805	306.8	-0.1344191	306.8	-0.06996287	306.8	-0.0485907	306.8	-0.0970387	306.8	-0.04887512	306.8	-0.04651121	306.8	-0.05438956
307	1.290742	307	1.188878	307	1.186291	307	1.1642	307	1.081004	307	1.161278	307	1.165694	307	-0.09838577	307	-0.07129577	307	-0.1335657	307	-0.06924324	307	-0.05097569	307	-0.09929609	307	-0.05348141	307	-0.0458969	307	-0.05318377
307.2	1.289352	307.2	1.187101	307.2	1.182109	307.2	1.164453	307.2	1.082041	307.2	1.16214	307.2	1.166604	307.2	-0.09719764	307.2	-0.07254449	307.2	-0.1294741	307.2	-0.07293194	307.2	-0.05068675	307.2	-0.1010599	307.2	-0.05084783	307.2	-0.0477252	307.2	-0.05301223
307.4	1.288981	307.4	1.194524	307.4	1.186905	307.4	1.162594	307.4	1.080766	307.4	1.159732	307.4	1.169769	307.4	-0.09231578	307.4	-0.07238345	307.4	-0.1321397	307.4	-0.0702718	307.4	-0.04993445	307.4	-0.09554819	307.4	-0.04843573	307.4	-0.04946122	307.4	-0.05343447
307.6	1.2866	307.6	1.190053	307.6	1.187132	307.6	1.166124	307.6	1.080124	307.6	1.159729	307.6	1.172622	307.6	-0.09199404	307.6	-0.07511571	307.6	-0.132555	307.6	-0.06946013	307.6	-0.04930823	307.6	-0.09588917	307.6	-0.05391414	307.6	-0.04623036	307.6	-0.05222849
307.8	1.28839	307.8	1.195479	307.8	1.188402	307.8	1.167884	307.8	1.085014	307.8	1.161783	307.8	1.165867	307.8	-0.09496618	307.8	-0.07169905	307.8	-0.1290303	307.8	-0.07501916	307.8	-0.05076727	307.8	-0.09701429	307.8	-0.0485575	307.8	-0.04763906	307.8	-0.05705433
308	1.29064	308	1.186518	308	1.186661	308	1.166474	308	1.084007	308	1.161007	308	1.17192	308	-0.09941633	308	-0.0706162	308	-0.1308333	308	-0.07182238	308	-0.05078557	308	-0.09721686	308	-0.05115454	308	-0.04570919	308	-0.05388059
308.2	1.292209	308.2	1.189644	308.2	1.188098	308.2	1.16584	308.2	1.080911	308.2	1.161208	308.2	1.170197	308.2	-0.096754	308.2	-0.07058236	308.2	-0.1290686	308.2	-0.06921368	308.2	-0.04584862	308.2	-0.09574438	308.2	-0.05112227	308.2	-0.04506828	308.2	-0.0535242
308.4	1.293559	308.4	1.189013	308.4	1.188311	308.4	1.16645	308.4	1.084644	308.4	1.164157	308.4	1.171149	308.4	-0.09534251	308.4	-0.06926275	308.4	-0.133639	308.4	-0.07005904	308.4	-0.05116009	308.4	-0.0976137	308.4	-0.05198325	308.4	-0.04784426	308.4	-0.05575459
308.6	1.291925	308.6	1.190032	308.6	1.192215	308.6	1.166008	308.6	1.084479	308.6	1.162296	308.6	1.169553	308.6	-0.09481756	308.6	-0.07238632	308.6	-0.1296826	308.6	-0.07140236	308.6	-0.0511119	308.6	-0.09456411	308.6	-0.04746968	308.6	-0.04523745	308.6	-0.05579476
308.8	1.290516	308.8	1.193772	308.8	1.190102	308.8	1.164456	308.8	1.083118	308.8	1.158525	308.8	1.174078	308.8	-0.09123271	308.8	-0.07436591	308.8	-0.1315267	308.8	-0.06987923	308.8	-0.05021417	308.8	-0.100291	308.8	-0.04735417	308.8	-0.04525851	308.8	-0.05054211
309	1.29176	309	1.189832	309	1.187999	309	1.167294	309	1.083885	309	1.159465	309	1.172566	309	-0.09508271	309	-0.07204369	309	-0.129253	309	-0.06842385	309	-0.04574895	309	-0.09672533	309	-0.05288218	309	-0.04123979	309	-0.05454232
309.2	1.293897	309.2	1.193356	309.2	1.196247	309.2	1.164826	309.2	1.077799	309.2	1.168332	309.2	1.172302	309.2	-0.09620568	309.2	-0.07085939	309.2	-0.1279429	309.2	-0.07224535	309.2	-0.04754314	309.2	-0.09619881	309.2	-0.04750777	309.2	-0.0407485	309.2	-0.05152861
309.4	1.294486	309.4	1.194208	309.4	1.188751	309.4	1.16155	309.4	1.083565	309.4	1.164361	309.4	1.16775	309.4	-0.09428461	309.4	-0.07699976	309.4	-0.1286227	309.4	-0.07092248	309.4	-0.04833066	309.4	-0.09739882	309.4	-0.05220095	309.4	-0.04506591	309.4	-0.05602663
309.6	1.295546	309.6	1.191941	309.6	1.186848	309.6	1.169153	309.6	1.081518	309.6	1.16441	309.6	1.168551	309.6	-0.09741163	309.6	-0.06802558	309.6	-0.1313264	309.6	-0.06927931	309.6	-0.04377643	309.6	-0.0954193	309.6	-0.04972281	309.6	-0.04470816	309.6	-0.05060221
309.8	1.293263	309.8	1.18578	309.8	1.184819	309.8	1.164414	309.8	1.086587	309.8	1.162619	309.8	1.169841	309.8	-0.09041053	309.8	-0.07249913	309.8	-0.1284446	309.8	-0.06422888	309.8	-0.04725235	309.8	-0.1003009	309.8	-0.04950007	309.8	-0.04535273	309.8	-0.05335987
310	1.295199	310	1.18879	310	1.190125	310	1.167924	310	1.084439	310	1.162276	310	1.16943	310	-0.09444471	310	-0.07356434	310	-0.127397	310	-0.06960115	310	-0.0462104	310	-0.09679406	310	-0.05127323	310	-0.03913043	310	-0.05573761
310.2	1.290768	310.2	1.194632	310.2	1.186719	310.2	1.166367	310.2	1.081717	310.2	1.166226	310.2	1.170154	310.2	-0.09258272	310.2	-0.06949091	310.2	-0.1294064	310.2	-0.06797454	310.2	-0.04833847	310.2	-0.09371033	310.2	-0.05035828	310.2	-0.04358852	310.2	-0.05226124
310.4	1.292402	310.4	1.191272	310.4	1.187841	310.4	1.164077	310.4	1.082283	310.4	1.158098	310.4	1.17136	310.4	-0.09575101	310.4	-0.07298966	310.4	-0.1271538	310.4	-0.06618194	310.4	-0.04777381	310.4	-0.1012523	310.4	-0.05074182	310.4	-0.0392627	310.4	-0.0492931
310.6	1.290855	310.6	1.191248	310.6	1.190933	310.6	1.16213	310.6	1.08083	310.6	1.164874	310.6	1.16995	310.6	-0.09594999	310.6	-0.06969631	310.6	-0.1271981	310.6	-0.07518223	310.6	-0.04870735	310.6	-0.09366319	310.6	-0.04902342	310.6	-0.04722495	310.6	-0.05263001
310.8	1.288055	310.8	1.194853	310.8	1.190909	310.8	1.168019	310.8	1.084866	310.8	1.164869	310.8	1.169616	310.8	-0.09661399	310.8	-0.07206428	310.8	-0.1290533	310.8	-0.07106248	310.8	-0.04767358	310.8	-0.0993701	310.8	-0.04917122	310.8	-0.04555941	310.8	-0.05328381
311	1.293561	311	1.191232	311	1.193349	311	1.166764	311	1.080582	311	1.164711	311	1.166353	311	-0.09650129	311	-0.07166103	311	-0.1261144	311	-0.0686882	311	-0.04683286	311	-0.09664433	311	-0.05025469	311	-0.04373819	311	-0.04817177
311.2	1.298477	311.2	1.191015	311.2	1.193087	311.2	1.166702	311.2	1.079069	311.2	1.162951	311.2	1.169031	311.2	-0.09077489	311.2	-0.0664178	311.2	-0.1259963	311.2	-0.06769831	311.2	-0.050019	311.2	-0.09508587	311.2	-0.04653694	311.2	-0.04432935	311.2	-0.05117394
311.4	1.292418	311.4	1.195391	311.4	1.195275	311.4	1.168846	311.4	1.085079	311.4	1.166687	311.4	1.170706	311.4	-0.09183455	311.4	-0.06981719	311.4	-0.1269508	311.4	-0.06975611	311.4	-0.04660678	311.4	-0.09547316	311.4	-0.0488775	311.4	-0.03914137	311.4	-0.0526301
311.6	1.294647	311.6	1.195465	311.6	1.195494	311.6	1.167817	311.6	1.082739	311.6	1.166415	311.6	1.170829	311.6	-0.1003268	311.6	-0.07044542	311.6	-0.1330997	311.6	-0.07215595	311.6	-0.05011404	311.6	-0.09575834	311.6	-0.04735459	311.6	-0.04795528	311.6	-0.05280958
311.8	1.297086	311.8	1.194487	311.8	1.191657	311.8	1.167495	311.8	1.08518	311.8	1.165542	311.8	1.172305	311.8	-0.09133801	311.8	-0.07217187	311.8	-0.1280478	311.8	-0.07726978	311.8	-0.05153843	311.8	-0.09704538	311.8	-0.04631998	311.8	-0.04379619	311.8	-0.04804709
312	1.296583	312	1.194363	312	1.191048	312	1.16439	312	1.092525	312	1.166237	312	1.174745	312	-0.09524501	312	-0.0710427	312	-0.130091	312	-0.0718127	312	-0.05003159	312	-0.09698454	312	-0.04839563	312	-0.04758427	312	-0.05100341
312.2	1.29507	312.2	1.191626	312.2	1.193193	312.2	1.170239	312.2	1.085332	312.2	1.1676	312.2	1.174809	312.2	-0.09405972	312.2	-0.07293606	312.2	-0.133242	312.2	-0.06915954	312.2	-0.04919203	312.2	-0.09510039	312.2	-0.0486782	312.2	-0.0457706	312.2	-0.05070465
312.4	1.296103	312.4	1.190899	312.4	1.197006	312.4	1.1661	312.4	1.08193	312.4	1.165003	312.4	1.16882	312.4	-0.09246686	312.4	-0.0674504	312.4	-0.1291289	312.4	-0.07015067	312.4	-0.04684754	312.4	-0.09742649	312.4	-0.04340932	312.4	-0.04113755	312.4	-0.05101212
312.6	1.293757	312.6	1.192582	312.6	1.190503	312.6	1.168021	312.6	1.082695	312.6	1.165013	312.6	1.17054	312.6	-0.09499829	312.6	-0.07369247	312.6	-0.1311996	312.6	-0.06488118	312.6	-0.04625967	312.6	-0.09335484	312.6	-0.05057012	312.6	-0.04273362	312.6	-0.0489031
312.8	1.297199	312.8	1.194916	312.8	1.194264	312.8	1.168719	312.8	1.082468	312.8	1.165796	312.8	1.170356	312.8	-0.09356911	312.8	-0.07080439	312.8	-0.1291622	312.8	-0.06696304	312.8	-0.04795296	312.8	-0.09641971	312.8	-0.04721978	312.8	-0.04354919	312.8	-0.0505204
313	1.297811	313	1.197086	313	1.19358	313	1.171146	313	1.084191	313	1.166958	313	1.171535	313	-0.0938769	313	-0.06696944	313	-0.1303771	313	-0.0689428	313	-0.04814737	313	-0.09280153	313	-0.04770313	313	-0.04826433	313	-0.05140572
313.2	1.303372	313.2	1.192713	313.2	1.188813	313.2	1.16664	313.2	1.085244	313.2	1.161324	313.2	1.174381	313.2	-0.09389541	313.2	-0.0692881	313.2	-0.1322854	313.2	-0.06826848	313.2	-0.04961703	313.2	-0.0911433	313.2	-0.04963858	313.2	-0.04651773	313.2	-0.05606405
313.4	1.300792	313.4	1.191928	313.4	1.192261	313.4	1.169976	313.4	1.086621	313.4	1.164001	313.4	1.173897	313.4	-0.09382913	313.4	-0.07262805	313.4	-0.1285163	313.4	-0.06938465	313.4	-0.04761613	313.4	-0.09472565	313.4	-0.04926633	313.4	-0.04718527	313.4	-0.05580827
313.6	1.298623	313.6	1.196841	313.6	1.192225	313.6	1.169155	313.6	1.08768	313.6	1.16101	313.6	1.167397	313.6	-0.09770907	313.6	-0.06743795	313.6	-0.1307159	313.6	-0.06776509	313.6	-0.04426217	313.6	-0.09506652	313.6	-0.04855624	313.6	-0.04760469	313.6	-0.04653254
313.8	1.300229	313.8	1.195412	313.8	1.194997	313.8	1.162133	313.8	1.086144	313.8	1.161203	313.8	1.174988	313.8	-0.09345929	313.8	-0.07158316	313.8	-0.1283573	313.8	-0.06843434	313.8	-0.04765326	313.8	-0.1025149	313.8	-0.05083739	313.8	-0.04476453	313.8	-0.04929791
314	1.297651	314	1.195325	314	1.195014	314	1.174072	314	1.082132	314	1.165097	314	1.172811	314	-0.09608041	314	-0.07145706	314	-0.1246204	314	-0.07205046	314	-0.04381617	314	-0.09317259	314	-0.05057116	314	-0.04438354	314	-0.05550515
314.2	1.298939	314.2	1.196109	314.2	1.190593	314.2	1.173933	314.2	1.08146	314.2	1.165777	314.2	1.168253	314.2	-0.09239636	314.2	-0.06759034	314.2	-0.1296167	314.2	-0.07122587	314.2	-0.04646738	314.2	-0.09274471	314.2	-0.04895963	314.2	-0.04184162	314.2	-0.0536111
314.4	1.296927	314.4	1.19642	314.4	1.192858	314.4	1.162817	314.4	1.084748	314.4	1.162321	314.4	1.166891	314.4	-0.09074633	314.4	-0.07029919	314.4	-0.1285464	314.4	-0.06733473	314.4	-0.04707304	314.4	-0.09809366	314.4	-0.04357851	314.4	-0.04070324	314.4	-0.04811468
314.6	1.302264	314.6	1.197795	314.6	1.193826	314.6	1.174665	314.6	1.084306	314.6	1.165381	314.6	1.17866	314.6	-0.09735493	314.6	-0.06440602	314.6	-0.1310698	314.6	-0.06587796	314.6	-0.04720816	314.6	-0.09380573	314.6	-0.04780413	314.6	-0.04188129	314.6	-0.05256696
[truncated: 11,976 more rows]
