# Supplementary material for: Functional development of a V3/glycan-specific broadly neutralizing antibody isolated from a case of HIV superinfection
Source: eLife journal article supplement (doi:10.7554/elife.68110), 2021-07-15
Supplement: fig2-data2 [file RawData0.xls]

A5		B5		C5		D5		E5		F5		G5		H5		A6		B6		C6		D6		E6		F6		G6		H6
0	0	0	0	0	0	0	0	0	0	0	0	0	0	0	0	0	0	0	0	0	0	0	0	0	0	0	0	0	0	0	0
0.2	0.00276745	0.2	-0.00033028	0.2	-0.0067903	0.2	0.01022738	0.2	0.00151103	0.2	-0.00102623	0.2	0.00006701	0.2	0.00093287	0.2	-0.00188525	0.2	0.00122711	0.2	-0.00070706	0.2	0.00420094	0.2	0.00007817	0.2	-0.0009967	0.2	0.00426282	0.2	-0.0015225
0.4	0.00111941	0.4	0.0036249	0.4	-0.00042523	0.4	0.00586345	0.4	0.00097901	0.4	-0.00131226	0.4	0.0012461	0.4	0.00343908	0.4	0.00080465	0.4	-0.00397927	0.4	0.00296668	0.4	0.00413986	0.4	-0.00153295	0.4	0.00125331	0.4	0.00329386	0.4	-0.00214909
0.6	0.00471423	0.6	0.00318633	0.6	0.00089546	0.6	0.0079213	0.6	0.0026655	0.6	-0.00015834	0.6	0.00497937	0.6	0.00541064	0.6	0.00252847	0.6	-0.00229472	0.6	0.00118909	0.6	0.00750993	0.6	-0.0029246	0.6	-0.00060475	0.6	-0.00077781	0.6	-0.00305841
0.8	0.00605017	0.8	0.00717787	0.8	0.00523101	0.8	0.0078693	0.8	0.00476545	0.8	-0.00199514	0.8	0.00028329	0.8	0.00706773	0.8	-0.00356798	0.8	0.00096659	0.8	0.00100018	0.8	0.00960936	0.8	-0.00256514	0.8	0.00239267	0.8	0.00500412	0.8	-0.00150832
1	0.0034745	1	0.00551176	1	0.00336973	1	0.00990508	1	0.00202129	1	0.00011157	1	0.00376132	1	0.00289817	1	0.00048598	1	-0.00221858	1	0.00007676	1	0.00704159	1	0.00331999	1	0.00385542	1	0.00745147	1	-0.0028704
1.2	0.00439315	1.2	0.00853278	1.2	0.00794506	1.2	0.01056428	1.2	0.00769913	1.2	0.00186607	1.2	0.00304136	1.2	0.00450553	1.2	0.00193878	1.2	-0.0025201	1.2	0.00302609	1.2	0.00965402	1.2	0.0020498	1.2	-0.00092029	1.2	0.00075659	1.2	-0.00032908
1.4	0.00806116	1.4	0.00825767	1.4	0.00357758	1.4	0.01069021	1.4	0.00896977	1.4	-0.00013921	1.4	0.0066197	1.4	0.0073247	1.4	0.0027635	1.4	-0.00260669	1.4	0.00253169	1.4	0.00255347	1.4	0.00037805	1.4	0.00394211	1.4	0.00851898	1.4	-0.00404809
1.6	0.00815583	1.6	0.00651621	1.6	0.00550444	1.6	0.00886451	1.6	0.0067496	1.6	0.00638285	1.6	-0.00042872	1.6	0.00920873	1.6	0.00112595	1.6	0.00104387	1.6	0.00216097	1.6	0.00612337	1.6	-0.00221659	1.6	-0.0037135	1.6	-0.00008796	1.6	0.00018328
1.8	0.0062708	1.8	0.00548098	1.8	0.00574131	1.8	0.0122722	1.8	0.00337303	1.8	0.00390903	1.8	0.00117891	1.8	0.00665726	1.8	0.00188569	1.8	-0.00176076	1.8	0.00036862	1.8	0.00326322	1.8	-0.00136826	1.8	0.00226979	1.8	0.0078178	1.8	-0.00146989
2	0.01073026	2	0.01309181	2	0.00530543	2	0.01179982	2	0.00421705	2	0.0047273	2	0.003171	2	0.01098346	2	0.00480112	2	0.00017261	2	0.00138294	2	0.01057124	2	0.00331988	2	-0.00046309	2	0.00388433	2	0.00113795
2.2	0.00797084	2.2	0.00137254	2.2	0.00989435	2.2	0.01213991	2.2	0.00457798	2.2	0.00563545	2.2	0.00618872	2.2	0.00947341	2.2	0.00078605	2.2	0.00375052	2.2	0.00803636	2.2	0.00981099	2.2	0.00002357	2.2	0.00753657	2.2	0.00311665	2.2	0.00539986
2.4	0.00434119	2.4	0.00967212	2.4	0.00540495	2.4	0.0118568	2.4	0.00712095	2.4	0.00093549	2.4	0.0102267	2.4	0.00281157	2.4	0.00480939	2.4	-0.00324497	2.4	0.00366904	2.4	0.0085864	2.4	-0.00274403	2.4	-0.00153965	2.4	0.00988744	2.4	-0.00062078
2.6	0.00981642	2.6	0.01220363	2.6	0.00513229	2.6	0.01067737	2.6	0.0096352	2.6	0.00506467	2.6	0.0090802	2.6	0.00478168	2.6	0.00712476	2.6	0.0011657	2.6	0.00602054	2.6	0.00784436	2.6	0.00275115	2.6	0.00167829	2.6	0.00100054	2.6	0.00049776
2.8	0.00963814	2.8	0.01276084	2.8	0.00696826	2.8	0.01042626	2.8	0.0069129	2.8	0.00718392	2.8	0.00465059	2.8	0.00528065	2.8	0.0026003	2.8	-0.00089309	2.8	0.00381499	2.8	0.00870545	2.8	0.00087729	2.8	0.00158194	2.8	0.00541403	2.8	0.00411837
3	0.0071859	3	0.01191408	3	0.00641606	3	0.01220045	3	0.013543	3	0.00592939	3	0.00157534	3	0.00809521	3	0.00684039	3	0.00388879	3	-0.00183071	3	0.00421353	3	0.00077606	3	0.00634727	3	0.00553994	3	0.00435697
3.2	0.00647778	3.2	0.00986766	3.2	0.00854269	3.2	0.01601712	3.2	0.00260622	3.2	0.00340631	3.2	0.00743289	3.2	0.00792033	3.2	0.00312734	3.2	0.00285594	3.2	0.00248637	3.2	0.00420135	3.2	0.00302021	3.2	0.00673624	3.2	0.00738433	3.2	0.00593899
3.4	0.00971501	3.4	0.00796256	3.4	0.00682583	3.4	0.01426228	3.4	0.00399009	3.4	0.00501672	3.4	0.00356796	3.4	0.00620886	3.4	0.00221557	3.4	0.00028306	3.4	0.00792648	3.4	0.01167646	3.4	-0.00106648	3.4	0.00327976	3.4	0.00086839	3.4	0.00277096
3.6	0.01303623	3.6	0.00908835	3.6	0.00626392	3.6	0.01471512	3.6	0.0096302	3.6	0.00425566	3.6	0.00562632	3.6	0.00931704	3.6	0.0006498	3.6	0.00075334	3.6	0.00377738	3.6	0.01214139	3.6	0.00489943	3.6	0.00221411	3.6	0.00796905	3.6	-0.00327367
3.8	0.00475211	3.8	0.01023382	3.8	0.00567147	3.8	0.01478343	3.8	0.00943911	3.8	0.00575476	3.8	0.00301267	3.8	0.00602673	3.8	0.00220399	3.8	0.00170427	3.8	-0.00242072	3.8	0.00605814	3.8	0.00031191	3.8	0.00343382	3.8	0.00889384	3.8	-0.00048191
4	0.01076407	4	0.01060941	4	0.00627603	4	0.01565784	4	0.00988758	4	0.00635882	4	0.0062168	4	0.00556813	4	0.00422634	4	0.00238685	4	0.00112135	4	0.0095621	4	0.00345504	4	0.0013204	4	0.00810475	4	0.00072231
4.2	0.00817752	4.2	0.00946433	4.2	0.01112927	4.2	0.01152798	4.2	0.00599488	4.2	0.00648591	4.2	0.0087757	4.2	0.00650848	4.2	0.00321406	4.2	0.00141933	4.2	0.00595051	4.2	0.00293638	4.2	0.00102289	4.2	0.00558773	4.2	0.00529487	4.2	0.00114003
4.4	0.01285729	4.4	0.00667028	4.4	0.00718518	4.4	0.01339481	4.4	0.00756024	4.4	0.00681483	4.4	0.00701641	4.4	0.00697351	4.4	0.00592893	4.4	0.00500313	4.4	0.00185009	4.4	0.00611933	4.4	0.0018449	4.4	0.00216479	4.4	0.00488888	4.4	0.00723801
4.6	0.01365859	4.6	0.00774211	4.6	0.00540123	4.6	0.01085935	4.6	0.00848399	4.6	0.00529115	4.6	0.00382959	4.6	0.00663023	4.6	0.00374607	4.6	0.0026802	4.6	0.00306696	4.6	0.01014738	4.6	0.00211681	4.6	0.00597224	4.6	0.00655695	4.6	-0.00095688
4.8	0.01111749	4.8	0.01030725	4.8	0.00462023	4.8	0.01526677	4.8	0.01075166	4.8	0.0025136	4.8	0.00317962	4.8	0.00827272	4.8	0.0028107	4.8	0.00597379	4.8	-0.00104836	4.8	0.01249816	4.8	0.00169849	4.8	0.0050636	4.8	0.01228932	4.8	0.00121866
5	0.0117654	5	0.01154086	5	0.01067755	5	0.00907571	5	0.00736769	5	0.0033706	5	0.00637447	5	0.00783036	5	0.00694821	5	0.00363528	5	0.00396111	5	0.00605104	5	-0.00054392	5	0.00475758	5	0.01099172	5	0.00076308
5.2	0.01284048	5.2	0.0109166	5.2	0.00640099	5.2	0.01262985	5.2	0.00892614	5.2	0.00749365	5.2	0.00787461	5.2	0.01117635	5.2	0.00572734	5.2	0.00451612	5.2	0.00765913	5.2	0.00923889	5.2	0.00293043	5.2	0.00541643	5.2	0.01146679	5.2	0.0050564
5.4	0.00898688	5.4	0.00819716	5.4	0.00875192	5.4	0.01423804	5.4	0.00783835	5.4	0.00637464	5.4	0.0075397	5.4	0.00994908	5.4	0.00526274	5.4	0.00313504	5.4	0.0068875	5.4	0.01126307	5.4	0.00105778	5.4	0.00626903	5.4	0.00292516	5.4	0.00293447
5.6	0.00832285	5.6	0.01299557	5.6	0.00405133	5.6	0.01323981	5.6	0.00743192	5.6	0.00849204	5.6	0.00215968	5.6	0.00541049	5.6	0.00534845	5.6	0.00466449	5.6	0.00930636	5.6	0.0102885	5.6	-0.00206058	5.6	-0.00153145	5.6	0.00688371	5.6	0.00264184
5.8	0.00998464	5.8	0.01337365	5.8	0.00686995	5.8	0.01302861	5.8	0.00817998	5.8	0.00738207	5.8	0.00759426	5.8	0.00666985	5.8	0.0068873	5.8	0.00499527	5.8	0.00552351	5.8	0.01144507	5.8	0.00549187	5.8	0.00390217	5.8	0.00860888	5.8	0.00369382
6	0.00862618	6	0.01310742	6	0.0076709	6	0.01401259	6	0.00658428	6	0.00379922	6	-0.00070651	6	0.00731854	6	0.00531379	6	0.00510191	6	0.00936099	6	0.00933265	6	-0.00027341	6	0.00798231	6	0.00599847	6	0.00418693
6.2	0.00852195	6.2	0.01713691	6.2	0.0065944	6.2	0.01451211	6.2	0.00531122	6.2	0.00619239	6.2	0.00403254	6.2	0.01014034	6.2	0.00365312	6.2	0.00426824	6.2	0.00510681	6.2	0.00885022	6.2	0.00385698	6.2	0.00417876	6.2	0.00518866	6.2	0.00207055
6.4	0.00977042	6.4	0.00908295	6.4	0.00850635	6.4	0.01647593	6.4	0.00912552	6.4	0.00610188	6.4	0.0070599	6.4	0.01022824	6.4	-0.00001186	6.4	0.00342505	6.4	0.00045807	6.4	0.01443633	6.4	0.00539199	6.4	0.00507612	6.4	0.01022363	6.4	0.00145784
6.6	0.01248826	6.6	0.00899423	6.6	0.00535115	6.6	0.01189054	6.6	0.00557249	6.6	0.00339967	6.6	0.00324433	6.6	0.00770121	6.6	0.00961549	6.6	-0.00151038	6.6	0.00554592	6.6	0.008583	6.6	0.00117683	6.6	0.00650651	6.6	0.00658682	6.6	0.00473432
6.8	0.01373831	6.8	0.00880833	6.8	0.00769117	6.8	0.01760866	6.8	0.00619639	6.8	0.00958735	6.8	0.01161075	6.8	0.00415258	6.8	0.00686952	6.8	0.00398602	6.8	0.00504433	6.8	0.01203373	6.8	0.00352841	6.8	0.00694667	6.8	0.00492127	6.8	0.00072082
7	0.01294259	7	0.0141178	7	0.01069213	7	0.01294207	7	0.00977306	7	0.00392933	7	0.00804877	7	0.01180659	7	0.00535873	7	0.00345077	7	0.00404972	7	0.00940126	7	0.00141904	7	0.0094134	7	0.00422984	7	0.00168704
7.2	0.01213396	7.2	0.01519979	7.2	0.00748227	7.2	0.01352444	7.2	0.01008529	7.2	0.00589574	7.2	0.00864364	7.2	0.00662614	7.2	0.00581124	7.2	0.00208024	7.2	0.00577537	7.2	0.01436523	7.2	0.00027145	7.2	0.00667006	7.2	0.00565937	7.2	-0.00256093
7.4	0.0111901	7.4	0.01531377	7.4	0.00480101	7.4	0.01465451	7.4	0.0061223	7.4	0.00744535	7.4	0.00542669	7.4	0.00519631	7.4	0.00609944	7.4	-0.00016405	7.4	0.00190611	7.4	0.01104612	7.4	0.00082787	7.4	0.00616532	7.4	0.01222799	7.4	0.003765
7.6	0.00972233	7.6	0.01445551	7.6	0.00914215	7.6	0.0107379	7.6	0.0076808	7.6	0.00320073	7.6	0.00400386	7.6	0.00799836	7.6	0.007334	7.6	0.00207897	7.6	0.00603787	7.6	0.01057901	7.6	-0.00058816	7.6	0.00339348	7.6	0.00676564	7.6	0.00291225
7.8	0.0159358	7.8	0.01354718	7.8	0.00392293	7.8	0.01733206	7.8	0.00815236	7.8	0.00725846	7.8	0.00755295	7.8	0.00818887	7.8	0.00056352	7.8	0.00452627	7.8	0.00219099	7.8	0.00908744	7.8	0.00640497	7.8	0.00314705	7.8	0.00774638	7.8	-0.0011299
8	0.01223828	8	0.01306433	8	0.00510252	8	0.01494639	8	0.00764356	8	0.00429678	8	0.00553405	8	0.00774981	8	0.00681286	8	0.00501174	8	0.00623241	8	0.01451865	8	0.00297279	8	0.00728596	8	0.00879697	8	0.00601739
8.2	0.01799801	8.2	0.01151458	8.2	0.00374445	8.2	0.01335567	8.2	0.00950801	8.2	0.00400112	8.2	0.00399944	8.2	0.0104082	8.2	0.00754086	8.2	0.00353025	8.2	0.00212472	8.2	0.01339697	8.2	0.00358668	8.2	0.00618786	8.2	0.00906997	8.2	-0.00173451
8.4	0.01028268	8.4	0.01083268	8.4	0.00760891	8.4	0.00997787	8.4	0.00736875	8.4	0.00633675	8.4	0.0077153	8.4	0.00941596	8.4	0.00649431	8.4	0.00103621	8.4	0.00678381	8.4	0.00879053	8.4	-0.00024821	8.4	0.00352769	8.4	0.00604507	8.4	0.00083088
8.6	0.00937552	8.6	0.01305422	8.6	0.00299962	8.6	0.0135452	8.6	0.00798075	8.6	0.00496426	8.6	0.00495345	8.6	0.00892581	8.6	0.00702208	8.6	0.00446278	8.6	0.01044276	8.6	0.01158501	8.6	0.00332179	8.6	0.00839284	8.6	0.00841105	8.6	0.00385485
8.8	0.01299284	8.8	0.01516148	8.8	0.00823487	8.8	0.0139423	8.8	0.00345054	8.8	0.00837166	8.8	0.00335715	8.8	0.01066602	8.8	0.00259633	8.8	0.00235316	8.8	0.0104545	8.8	0.01186087	8.8	0.00695917	8.8	0.00509958	8.8	0.01595162	8.8	0.00047606
9	0.00716733	9	0.01227748	9	0.00667349	9	0.01436026	9	0.01079274	9	0.00673927	9	0.00427694	9	0.00361971	9	0.00766513	9	0.00390395	9	0.00667709	9	0.01404859	9	-0.00048638	9	0.00550742	9	0.00858632	9	0.00112404
9.2	0.01427784	9.2	0.01132463	9.2	0.00431622	9.2	0.01673042	9.2	0.01000278	9.2	0.00700172	9.2	0.0091652	9.2	0.01244476	9.2	0.00628839	9.2	0.00503533	9.2	0.00879458	9.2	0.00886363	9.2	0.00188758	9.2	0.00991502	9.2	0.00780389	9.2	0.00529159
9.4	0.01620258	9.4	0.01417158	9.4	0.00474628	9.4	0.01811806	9.4	0.0073028	9.4	0.00498563	9.4	0.00887687	9.4	0.00562552	9.4	0.00319572	9.4	0.00560158	9.4	0.0085375	9.4	0.00811054	9.4	-0.00094361	9.4	0.00674354	9.4	0.00688163	9.4	0.00026324
9.6	0.014243	9.6	0.01741806	9.6	0.0076235	9.6	0.01801244	9.6	0.01064479	9.6	0.00402794	9.6	0.00743309	9.6	0.01361994	9.6	0.00656649	9.6	0.00240184	9.6	0.01147611	9.6	0.00953711	9.6	0.00235637	9.6	0.00694593	9.6	0.00608307	9.6	0.00195541
9.8	0.01315494	9.8	0.01212428	9.8	0.01148941	9.8	0.01331054	9.8	0.00687529	9.8	0.01161197	9.8	0.00484115	9.8	0.01149679	9.8	0.00341216	9.8	0.00473218	9.8	0.00521981	9.8	0.01176681	9.8	-0.00016535	9.8	0.00182961	9.8	0.00771501	9.8	0.00378377
10	0.01202677	10	0.01605748	10	0.00826795	10	0.01754122	10	0.00919308	10	0.00914725	10	0.00742839	10	0.00744154	10	0.00397992	10	0.00788918	10	0.00648652	10	0.01368649	10	0.0023404	10	0.00589998	10	0.01000919	10	0.00164867
10.2	0.01834043	10.2	0.0169339	10.2	0.01164205	10.2	0.01795698	10.2	0.01103362	10.2	0.0066446	10.2	0.00765305	10.2	0.01187978	10.2	0.00343141	10.2	0.00400713	10.2	0.00661253	10.2	0.01202204	10.2	0.00321114	10.2	0.00572687	10.2	0.0043194	10.2	0.00473093
10.4	0.0099431	10.4	0.01641637	10.4	0.01252683	10.4	0.01653759	10.4	0.01021292	10.4	0.00780164	10.4	0.00399531	10.4	0.00733193	10.4	0.0074178	10.4	0.00415846	10.4	0.01149896	10.4	0.01674463	10.4	0.00315053	10.4	0.0033974	10.4	0.00351953	10.4	0.00432765
10.6	0.01362397	10.6	0.01366576	10.6	0.00946952	10.6	0.01228584	10.6	0.00908414	10.6	0.00684559	10.6	0.00805597	10.6	0.0075023	10.6	0.00527389	10.6	0.00293528	10.6	0.0056503	10.6	0.01155802	10.6	0.00366737	10.6	0.00658476	10.6	0.00609661	10.6	0.00514651
10.8	0.01531983	10.8	0.01563779	10.8	0.0079869	10.8	0.01285744	10.8	0.00655432	10.8	0.01061452	10.8	0.0044516	10.8	0.00510952	10.8	0.00491175	10.8	0.00528279	10.8	0.00880989	10.8	0.00905953	10.8	0.00574493	10.8	0.00523826	10.8	0.00742511	10.8	0.00260888
11	0.00978157	11	0.01725415	11	0.01421751	11	0.01459475	11	0.00775138	11	0.00591976	11	0.01231521	11	0.00772801	11	0.00348406	11	0.00420834	11	0.00985618	11	0.01155758	11	0.0037598	11	0.00478008	11	0.01212036	11	0.00300592
11.2	0.01601456	11.2	0.01572736	11.2	0.00830792	11.2	0.01452421	11.2	0.00903302	11.2	0.00949255	11.2	0.0131548	11.2	0.00955685	11.2	0.00714742	11.2	0.00663286	11.2	0.01096415	11.2	0.01420452	11.2	0.00227941	11.2	0.00991078	11.2	0.00102302	11.2	0.0042503
11.4	0.01058343	11.4	0.01465808	11.4	0.01147177	11.4	0.01854824	11.4	0.01061159	11.4	0.00826672	11.4	0.00959941	11.4	0.01239203	11.4	0.0060646	11.4	0.00454918	11.4	0.00210757	11.4	0.00776035	11.4	0.00078848	11.4	0.01260792	11.4	0.00743128	11.4	0.00324666
11.6	0.01081813	11.6	0.01650209	11.6	0.00866885	11.6	0.01375633	11.6	0.00543522	11.6	0.00644739	11.6	0.00873448	11.6	0.00835194	11.6	0.0097398	11.6	0.00675066	11.6	0.00931168	11.6	0.01308137	11.6	0.00385345	11.6	0.010728	11.6	0.0104964	11.6	0.00580216
11.8	0.01501414	11.8	0.01164694	11.8	0.00470102	11.8	0.01414527	11.8	0.00807197	11.8	0.005066	11.8	0.00877258	11.8	0.00650699	11.8	0.00188548	11.8	0.00055798	11.8	0.0058597	11.8	0.00883202	11.8	0.00266579	11.8	0.00820747	11.8	0.00664684	11.8	0.0036146
12	0.01023249	12	0.01729052	12	0.01129441	12	0.01834701	12	0.00816714	12	0.00728751	12	0.00218101	12	0.00771881	12	0.00428718	12	0.00612831	12	0.00616549	12	0.01195826	12	-0.00047506	12	0.00541394	12	0.01068881	12	0.00125673
12.2	0.01288992	12.2	0.01239106	12.2	0.01130683	12.2	0.01858072	12.2	0.01011518	12.2	0.00892647	12.2	0.00887229	12.2	0.0071158	12.2	0.00759607	12.2	0.00515148	12.2	0.00999346	12.2	0.0108278	12.2	-0.00130654	12.2	0.00579979	12.2	0.0091413	12.2	0.00025674
12.4	0.0194051	12.4	0.01076758	12.4	0.0059208	12.4	0.01496838	12.4	0.00504995	12.4	0.01077049	12.4	0.00555594	12.4	0.00673238	12.42	0.00747382	12.42	0.00866036	12.42	0.00665999	12.42	0.01301321	12.42	-0.00017236	12.42	0.0092384	12.42	0.00825321	12.42	0.00782537
12.6	0.01345233	12.6	0.01361803	12.6	0.00744513	12.6	0.01682782	12.6	0.00813773	12.6	0.00494917	12.6	0.00629645	12.6	0.01056537	12.6	0.00962186	12.6	0.01086767	12.6	0.00827915	12.6	0.0092264	12.6	0.00119314	12.6	0.00716738	12.6	0.00978792	12.6	-0.00014379
12.8	0.01489685	12.8	0.0119697	12.8	0.00703079	12.8	0.01743308	12.8	0.00823712	12.8	0.00856837	12.8	0.00400113	12.8	0.0121227	12.8	0.00821941	12.8	0.00549819	12.8	0.00923891	12.8	0.0116257	12.8	0.00165714	12.8	0.00718739	12.8	0.00939703	12.8	0.0029561
13	0.01627459	13	0.01463687	13	0.00630158	13	0.01330614	13	0.00853722	13	0.00917616	13	0.00549238	13	0.00845711	13	0.01301472	13	0.00790663	13	0.00768909	13	0.01216203	13	0.00016216	13	0.00898998	13	0.00807747	13	0.00331077
13.2	0.01423374	13.2	0.01769682	13.2	0.01229691	13.2	0.01136465	13.2	0.01211143	13.2	0.00773523	13.2	0.00632816	13.2	0.00748067	13.2	0.00752291	13.2	-0.00052055	13.2	0.00608567	13.2	0.01228136	13.2	0.00199027	13.2	0.0066359	13.2	0.00528996	13.2	-0.0032454
13.4	0.01469628	13.4	0.01348327	13.4	0.0098718	13.4	0.01184828	13.4	0.0087989	13.4	0.00236961	13.4	0.00731776	13.4	0.00653687	13.4	0.0056494	13.4	0.00361131	13.4	0.00795943	13.4	0.01170179	13.4	0.00967045	13.4	0.00782759	13.4	0.01007076	13.4	0.00224205
13.6	0.0142851	13.6	0.01754107	13.6	0.00801888	13.6	0.0162439	13.6	0.0075772	13.6	0.00701689	13.6	0.00539706	13.6	0.01571878	13.6	0.01195634	13.6	0.00961244	13.6	0.00996537	13.6	0.01094387	13.6	0.0025949	13.6	0.00623961	13.6	0.00802113	13.6	0.00184281
13.8	0.0194743	13.8	0.01424737	13.8	0.00622748	13.8	0.01585431	13.8	0.00595977	13.8	0.00863338	13.8	0.00385142	13.8	0.01546471	13.8	0.00600824	13.8	0.01045655	13.8	0.01210077	13.8	0.01772273	13.8	0.00382287	13.8	0.01153507	13.8	0.00211822	13.8	0.00682574
14	0.01356562	14	0.01467229	14	0.00678598	14	0.01347152	14	0.01081622	14	0.00670385	14	0.00379581	14	0.00762886	14	0.0106672	14	0.00605636	14	0.00622516	14	0.00951908	14	0.00307066	14	0.00483163	14	0.01279939	14	0.00083369
14.2	0.0202076	14.2	0.01370251	14.2	0.00897584	14.2	0.01483593	14.2	0.00996051	14.2	0.01473627	14.2	0.00370559	14.2	0.00633279	14.2	0.00240875	14.2	0.00174902	14.2	0.00723403	14.2	0.01133317	14.2	0.00453678	14.2	0.01122306	14.2	0.00632829	14.2	-0.00121312
14.4	0.01395392	14.4	0.0151863	14.4	0.00486253	14.4	0.01439632	14.4	0.00685081	14.4	0.00687143	14.4	0.00908048	14.4	0.01043508	14.4	0.00520878	14.4	0.00897565	14.4	0.00997243	14.4	0.01313585	14.4	0.00641456	14.4	0.00960229	14.4	0.00887552	14.4	0.00171527
14.6	0.01639192	14.6	0.01260381	14.6	0.00645249	14.6	0.0189083	14.6	0.0092324	14.6	0.00777656	14.6	0.00435653	14.6	0.00570588	14.6	0.00840346	14.6	0.0079787	14.6	0.00761962	14.6	0.00829151	14.6	0.00113682	14.6	0.00544997	14.6	0.01075893	14.6	0.00365161
14.8	0.01423596	14.8	0.0126569	14.8	0.0105624	14.8	0.01868992	14.8	0.00805101	14.8	0.00615373	14.8	0.00371162	14.8	0.01302127	14.81	0.00880457	14.81	0.00348947	14.81	0.00455302	14.81	0.01632989	14.81	0.01204325	14.81	0.00754968	14.81	0.00695894	14.81	0.00249199
15	0.01311144	15	0.01327497	15	0.00595837	15	0.01676552	15	0.01047517	15	0.01009809	15	0.00545828	15	0.01343786	15	0.01061962	15	0.00366243	15	0.00916094	15	0.01470214	15	0.00111501	15	0.00902144	15	0.00706162	15	0.00163303
15.2	0.01396149	15.2	0.0167191	15.2	0.00417925	15.2	0.01556612	15.2	0.00778174	15.2	0.01023404	15.2	0.00623358	15.2	0.00941632	15.2	0.00881333	15.2	0.00577092	15.2	0.00983209	15.2	0.0164528	15.2	0.00370625	15.2	0.01184015	15.2	0.00829592	15.2	0.00548214
15.4	0.01378777	15.4	0.01450623	15.4	0.01049161	15.4	0.01963628	15.4	0.00840059	15.4	0.00643674	15.4	0.00670957	15.4	0.01329491	15.4	0.00554754	15.4	0.00967555	15.4	0.00679393	15.4	0.01404379	15.4	0.00285436	15.4	0.00869078	15.4	0.00749719	15.4	0.00198799
15.6	0.01871808	15.6	0.01393381	15.6	0.00864665	15.6	0.01329943	15.6	0.00560359	15.6	0.00873054	15.6	0.00942856	15.6	0.00712343	15.6	0.00432534	15.6	0.0092128	15.6	0.01155259	15.6	0.01563719	15.6	0.00195084	15.6	0.00565504	15.6	0.00992204	15.6	0.00294091
15.8	0.01455457	15.8	0.0118445	15.8	0.00697778	15.8	0.01616541	15.8	0.00672598	15.8	0.00837612	15.8	0.00595541	15.8	0.01307509	15.8	0.00803312	15.8	0.00942165	15.8	0.00620038	15.8	0.01445219	15.8	0.00429315	15.8	0.00687464	15.8	0.00733916	15.8	0.00491982
16	0.01172712	16	0.0142524	16	0.00676445	16	0.01214027	16	0.01152727	16	0.00652131	16	0.00581831	16	0.00557687	16	0.00997033	16	0.01188916	16	0.00673352	16	0.01256023	16	0.00433355	16	0.0106838	16	0.00839022	16	0.00287376
16.2	0.01977305	16.2	0.01079457	16.2	0.00678852	16.2	0.01735666	16.2	0.00606452	16.2	0.00899945	16.2	0.00447425	16.2	0.01197625	16.2	0.00654968	16.2	0.00245273	16.2	0.01140416	16.2	0.00895289	16.2	0.0042895	16.2	0.00656616	16.2	0.0067835	16.2	0.00079488
16.4	0.01428579	16.4	0.01564215	16.4	0.00668627	16.4	0.0185661	16.4	0.01261743	16.4	0.00595279	16.4	0.00762065	16.4	0.01026832	16.4	0.01075322	16.4	0.00398825	16.4	0.00583502	16.4	0.01253677	16.4	0.00491705	16.4	0.0041582	16.4	0.00996164	16.4	0.0068844
16.6	0.0152091	16.6	0.02088562	16.6	0.00632478	16.6	0.01561228	16.6	0.0093723	16.6	0.00736106	16.6	0.00732305	16.6	0.0096862	16.6	0.00745898	16.6	0.00789076	16.6	0.00550258	16.6	0.01205806	16.6	0.00027602	16.6	0.00900664	16.6	0.01138028	16.6	0.00537283
16.8	0.01836392	16.8	0.01707605	16.8	0.01101676	16.8	0.01672358	16.8	0.00673144	16.8	0.00463776	16.8	0.00750735	16.8	0.01052545	16.8	0.00761719	16.8	0.00436478	16.8	0.00752376	16.8	0.00993207	16.8	0.00556379	16.8	0.00712466	16.8	0.00442209	16.8	-0.00139546
17	0.01615202	17	0.01332373	17	0.01183213	17	0.01519801	17	0.0062925	17	0.00716503	17	0.00259593	17	0.00897398	17	0.00428551	17	0.0062701	17	0.00920246	17	0.01418517	17	0.00278943	17	0.01157364	17	0.00951515	17	0.00166957
17.2	0.01583618	17.2	0.0150875	17.2	0.00613056	17.2	0.01020069	17.2	0.01234106	17.2	0.01096892	17.2	0.00439261	17.2	0.00802505	17.2	0.00736073	17.2	0.00758603	17.2	0.01160591	17.2	0.0115257	17.2	0.00379248	17.2	0.00991767	17.2	0.00560067	17.2	0.00546426
17.4	0.01462978	17.4	0.01736226	17.4	0.01001638	17.4	0.01852458	17.4	0.00837517	17.4	0.00923369	17.4	0.00465467	17.4	0.00954437	17.4	0.00878034	17.4	0.00538448	17.4	0.00882216	17.4	0.01261847	17.4	0.0042334	17.4	0.00798307	17.4	0.00731945	17.4	0.00470259
17.6	0.0169282	17.6	0.01395342	17.6	0.00840907	17.6	0.01503877	17.6	0.00668648	17.6	0.00844172	17.6	0.00643561	17.6	0.01480246	17.6	0.00465036	17.6	0.00564999	17.6	0.01147041	17.6	0.01386477	17.6	0.00671098	17.6	0.00851316	17.6	0.00495531	17.6	0.00256576
17.8	0.01492779	17.8	0.01440824	17.8	0.00483951	17.8	0.01287201	17.8	0.01246732	17.8	0.01176685	17.8	0.00953383	17.8	0.01564774	17.8	0.00977365	17.8	0.00565114	17.8	0.0090055	17.8	0.01682652	17.8	0.00507616	17.8	0.0121575	17.8	0.00770091	17.8	0.00246006
18	0.0117801	18	0.01127942	18	0.00606795	18	0.01599652	18	0.01274877	18	0.007472	18	0.00630832	18	0.00627721	18	0.01252201	18	0.00622551	18	0.00860074	18	0.01445723	18	0.00831036	18	0.00557229	18	0.00834623	18	-0.00029108
18.2	0.01484854	18.2	0.01682792	18.2	0.00757479	18.2	0.0172771	18.2	0.00874204	18.2	0.00713456	18.2	0.0069014	18.2	0.01279052	18.2	0.00769746	18.2	0.00485529	18.2	0.01020273	18.2	0.01574757	18.2	0.00316613	18.2	0.01263603	18.2	0.00880121	18.2	0.00328011
18.4	0.01194168	18.4	0.01509207	18.4	0.00837845	18.4	0.01945867	18.4	0.01103191	18.4	0.00838789	18.4	0.00468272	18.4	0.00860269	18.4	0.00456178	18.4	0.00882232	18.4	0.00932913	18.4	0.01207323	18.4	0.00472571	18.4	0.01301136	18.4	0.00751099	18.4	0.00274732
18.6	0.01254749	18.6	0.01588229	18.6	0.01044418	18.6	0.01644986	18.6	0.00877624	18.6	0.00686207	18.6	0.00589126	18.6	0.01217387	18.6	0.00971069	18.6	0.00477692	18.6	0.0069716	18.6	0.01621635	18.6	0.00295265	18.6	0.0087746	18.6	0.01190529	18.6	0.00133104
18.8	0.01806456	18.8	0.01382156	18.8	0.01330171	18.8	0.01879328	18.8	0.00906305	18.8	0.0062883	18.8	0.00235273	18.8	0.00978038	18.8	0.00685378	18.8	0.00890368	18.8	0.01000322	18.8	0.01914105	18.8	0.00212231	18.8	0.00982992	18.8	0.01048957	18.8	0.00483949
19	0.01835085	19	0.0218415	19	0.01135556	19	0.0224641	19	0.00860016	19	0.00699104	19	0.00966579	19	0.00483121	19	0.00473188	19	0.00581268	19	0.00551879	19	0.01298248	19	0.00448164	19	0.00812045	19	0.00746562	19	0.00138812
19.2	0.01589629	19.2	0.01683499	19.2	0.00874654	19.2	0.0169054	19.2	0.01199243	19.2	0.00714424	19.2	0.00438039	19.2	0.0148864	19.2	0.00663543	19.2	0.00965663	19.2	0.00956696	19.2	0.01233441	19.2	-0.00207116	19.2	0.00849946	19.2	0.00907691	19.2	-0.00027062
19.4	0.01743894	19.4	0.01545493	19.4	0.00676338	19.4	0.01860957	19.4	0.01157379	19.4	0.01031539	19.4	0.00519042	19.4	0.01257057	19.4	0.00241775	19.4	0.00725641	19.4	0.00866774	19.4	0.01259069	19.4	0.00512255	19.4	0.01176934	19.4	0.01065497	19.4	0.00690441
19.6	0.01701253	19.6	0.01574506	19.6	0.00659066	19.6	0.02098827	19.6	0.00796069	19.6	0.00874402	19.6	0.00665948	19.6	0.01160015	19.6	0.00634855	19.6	0.00678424	19.6	0.00808793	19.6	0.01562609	19.6	0.00217499	19.6	0.01147655	19.6	0.00654402	19.6	0.0040732
19.8	0.0155129	19.8	0.02127931	19.8	0.00583657	19.8	0.01449818	19.8	0.00984205	19.8	0.0044959	19.8	0.00927332	19.8	0.00759529	19.8	0.00996045	19.8	0.01101808	19.8	0.0072084	19.8	0.01475494	19.8	0.00339977	19.8	0.01019489	19.8	0.00728437	19.8	0.00437333
20	0.01472522	20	0.01632534	20	0.00848579	20	0.01792095	20	0.00918234	20	0.00750955	20	0.00540851	20	0.01063364	20	0.01063813	20	0.007637	20	0.01197374	20	0.01688351	20	0.00375743	20	0.00958182	20	0.00774455	20	0.00134829
20.2	0.01913425	20.2	0.01404837	20.2	0.01257225	20.2	0.01883901	20.2	0.00509545	20.2	0.00710505	20.2	0.00944217	20.2	0.01112413	20.2	0.00851749	20.2	0.00832155	20.2	0.0097006	20.2	0.01297457	20.2	0.00137981	20.2	0.00556947	20.2	0.00727133	20.2	0.00417766
20.4	0.01313982	20.4	0.0199613	20.4	0.00853346	20.4	0.0192223	20.4	0.01094664	20.4	0.0108733	20.4	0.00945036	20.4	0.01546151	20.4	0.00789488	20.4	0.00489449	20.4	0.00797826	20.4	0.01501827	20.4	0.00484692	20.4	0.01136358	20.4	0.00802679	20.4	0.00275416
20.6	0.01993142	20.6	0.02232346	20.6	0.00849005	20.6	0.01701	20.6	0.0096201	20.6	0.01131654	20.6	0.00840219	20.6	0.00616582	20.6	0.00496972	20.6	0.00628942	20.6	0.00938037	20.6	0.01221794	20.6	0.00644653	20.6	0.01151883	20.6	0.01195666	20.6	0.00328371
20.8	0.02004121	20.8	0.02136652	20.8	0.00795629	20.8	0.01999063	20.8	0.01279465	20.8	0.00863001	20.8	0.00743853	20.8	0.00981374	20.8	0.00809152	20.8	0.00690392	20.8	0.00929925	20.8	0.01790595	20.8	0.00700409	20.8	0.01088159	20.8	0.00596295	20.8	0.00045261
21	0.01581044	21	0.01696319	21	0.01306712	21	0.01638657	21	0.0080117	21	0.00546893	21	0.00734214	21	0.01093853	21.01	0.0086508	21.01	0.00679597	21.01	0.00910038	21.01	0.01575034	21.01	0.00471127	21.01	0.01071434	21.01	0.00842178	21.01	0.00344138
21.2	0.01866801	21.2	0.02167523	21.2	0.00595512	21.2	0.02057927	21.2	0.00859665	21.2	0.01064649	21.2	0.00274937	21.2	0.01286592	21.2	0.01164824	21.2	0.00863193	21.2	0.00861054	21.2	0.0153926	21.2	0.00960857	21.2	0.01134658	21.2	0.01045809	21.2	0.00434438
21.4	0.01711718	21.4	0.02071418	21.4	0.00289939	21.4	0.02027905	21.4	0.00968023	21.4	0.00801586	21.4	0.00314337	21.4	0.00995004	21.4	0.00413014	21.4	0.00300452	21.4	0.00846734	21.4	0.01695387	21.4	0.00894425	21.4	0.00863561	21.4	0.00977978	21.4	0.00665093
21.6	0.01315875	21.6	0.01988228	21.6	0.00256055	21.6	0.01906648	21.6	0.0057063	21.6	0.00855897	21.6	0.00826807	21.6	0.01132216	21.6	0.01005159	21.6	0.01006295	21.6	0.01059262	21.6	0.01233389	21.6	0.0051769	21.6	0.01015182	21.6	0.00581499	21.6	0.00216224
21.8	0.01685796	21.8	0.01941307	21.8	0.00930707	21.8	0.01839838	21.8	0.00997504	21.8	0.01112572	21.8	0.00282351	21.8	0.00880097	21.8	0.00976676	21.8	0.00930731	21.8	0.01165714	21.8	0.01461515	21.8	0.00570946	21.8	0.00991316	21.8	0.00605937	21.8	0.00572343
22	0.01934102	22	0.01522762	22	0.0074234	22	0.02024782	22	0.01165644	22	0.00690833	22	0.00532737	22	0.0088753	22	0.00849652	22	0.0114104	22	0.01258923	22	0.01385641	22	0.00537844	22	0.01168748	22	0.00786683	22	-0.00033708
22.2	0.01916208	22.2	0.02100977	22.2	0.00723056	22.2	0.01990706	22.2	0.00954065	22.2	0.00941324	22.2	0.00555143	22.2	0.01021776	22.2	0.00750964	22.2	0.00778858	22.2	0.01267775	22.2	0.01049988	22.2	0.0046449	22.2	0.00980057	22.2	0.00934534	22.2	0.00378109
22.4	0.01406725	22.4	0.01707279	22.4	0.0095728	22.4	0.01829451	22.4	0.00913157	22.4	0.00675727	22.4	0.00994039	22.4	0.00999355	22.4	0.00537935	22.4	0.00909354	22.4	0.01279299	22.4	0.0156383	22.4	0.00707018	22.4	0.00871072	22.4	0.00901247	22.4	0.00132015
22.6	0.01757107	22.6	0.01777153	22.6	0.008393	22.6	0.01780578	22.6	0.01230206	22.6	0.00841932	22.6	0.00689797	22.6	0.01360148	22.6	0.01172147	22.6	0.00442905	22.6	0.00999995	22.6	0.01392372	22.6	0.00330261	22.6	0.00816926	22.6	0.00915417	22.6	0.00461883
22.8	0.01950709	22.8	0.01467185	22.8	0.01226286	22.8	0.01850127	22.8	0.01018226	22.8	0.00935667	22.8	0.00603945	22.8	0.01428786	22.8	0.00683008	22.8	0.00756868	22.8	0.00889121	22.8	0.01384773	22.8	0.00452363	22.8	0.01024581	22.8	0.00691726	22.8	0.00050324
23	0.01355013	23	0.01251057	23	0.00849009	23	0.01604782	23	0.00916571	23	0.01219676	23	0.00744711	23	0.00858821	23	0.00836491	23	0.00740257	23	0.00955145	23	0.01675	23	0.00657828	23	0.00857296	23	0.01216131	23	0.00016124
23.2	0.02036712	23.2	0.01861375	23.2	0.00787135	23.2	0.02266069	23.2	0.00901709	23.2	0.00876311	23.2	0.0084825	23.2	0.00679539	23.2	0.0082827	23.2	0.00854108	23.2	0.00792143	23.2	0.01428036	23.2	0.00250684	23.2	0.01244858	23.2	0.01085838	23.2	-0.00058696
23.4	0.01840899	23.4	0.01524854	23.4	0.01133761	23.4	0.01673622	23.4	0.00817182	23.4	0.00795934	23.4	0.0040414	23.4	0.00721128	23.4	0.00818746	23.4	0.00774033	23.4	0.01047584	23.4	0.01902077	23.4	0.00409555	23.4	0.01042319	23.4	0.00928963	23.4	0.00368515
23.6	0.01574112	23.6	0.01886644	23.6	0.01091353	23.6	0.02140915	23.6	0.0051422	23.6	0.00961326	23.6	0.01062855	23.6	0.01021518	23.6	0.01066936	23.6	0.01129743	23.6	0.00657789	23.6	0.01806837	23.6	0.00427307	23.6	0.0103773	23.6	0.00860544	23.6	0.00170861
23.8	0.01419729	23.8	0.01396084	23.8	0.00779361	23.8	0.0170931	23.8	0.01310944	23.8	0.00824759	23.8	0.00728319	23.8	0.01291608	23.8	0.01092774	23.8	0.00954674	23.8	0.01378769	23.8	0.01361869	23.8	0.00513639	23.8	0.00896748	23.8	0.00999678	23.8	0.00046001
24	0.01846971	24	0.01534572	24	0.010157	24	0.02004502	24	0.00864297	24	0.00290504	24	0.00783068	24	0.01023155	24	0.00726506	24	0.01161175	24	0.00926579	24	0.0193997	24	0.00867459	24	0.00785967	24	0.00714796	24	-0.00039896
24.2	0.01640973	24.2	0.02032526	24.2	0.00854514	24.2	0.01869159	24.2	0.01223064	24.2	0.01114805	24.2	0.00390492	24.2	0.0072346	24.2	0.00706786	24.2	0.00927541	24.2	0.00938208	24.2	0.01390523	24.2	0.00757917	24.2	0.01167865	24.2	0.01055537	24.2	0.00417375
24.4	0.01898968	24.4	0.01926722	24.4	0.00686277	24.4	0.02109584	24.4	0.01029284	24.4	0.0086258	24.4	0.00553666	24.4	0.00988197	24.4	0.00683021	24.4	0.00822633	24.4	0.00996997	24.4	0.01902691	24.4	0.00150251	24.4	0.00968421	24.4	0.00979601	24.4	0.00244076
24.6	0.02121435	24.6	0.01523996	24.6	0.00766311	24.6	0.01816339	24.6	0.00658952	24.6	0.00749986	24.6	0.00458445	24.6	0.01085777	24.6	0.0071525	24.6	0.0114539	24.6	0.00875763	24.6	0.01513657	24.6	0.00494702	24.6	0.0112811	24.6	0.00990997	24.6	0.00225682
24.8	0.01897522	24.8	0.01843124	24.8	0.01000984	24.8	0.01773285	24.8	0.01008106	24.8	0.01012176	24.8	0.0080114	24.8	0.01087083	24.8	0.01181971	24.8	0.0095409	24.8	0.00938756	24.8	0.01511106	24.8	0.00684428	24.8	0.01338992	24.8	0.00972288	24.8	0.00265441
25	0.01609448	25	0.02063376	25	0.00906975	25	0.01658904	25	0.00864112	25	0.00971625	25	0.00641835	25	0.01040852	25	0.0079295	25	0.01200524	25	0.01255826	25	0.01894169	25	0.00577072	25	0.01492416	25	0.00687791	25	-0.00050891
25.2	0.02016594	25.2	0.01747882	25.2	0.01190464	25.2	0.0186123	25.2	0.01322361	25.2	0.00899278	25.2	0.00403411	25.2	0.0108275	25.2	0.01506941	25.2	0.01021908	25.2	0.00669478	25.2	0.01900352	25.2	0.00860577	25.2	0.00855514	25.2	0.00719497	25.2	0.00329755
25.4	0.02104698	25.4	0.02285991	25.4	0.00673216	25.4	0.02106216	25.4	0.00832881	25.4	0.00883842	25.4	0.00631836	25.4	0.01220174	25.4	0.00545137	25.4	0.01099004	25.4	0.01095517	25.4	0.01638714	25.4	0.00388222	25.4	0.01115455	25.4	0.01350221	25.4	0.00541279
25.6	0.01768215	25.6	0.02146198	25.6	0.00604913	25.6	0.02396568	25.6	0.0100947	25.6	0.0081751	25.6	0.00956252	25.6	0.01012891	25.6	0.00474685	25.6	0.00896095	25.6	0.01205999	25.6	0.01491962	25.6	0.00216673	25.6	0.00798202	25.6	0.01151606	25.6	0.00312032
25.8	0.02140189	25.8	0.01576922	25.8	0.00516256	25.8	0.01784599	25.8	0.00771401	25.8	0.00733222	25.8	0.00513973	25.8	0.01122452	25.8	0.00595816	25.8	0.00793752	25.8	0.01397567	25.8	0.019105	25.8	0.00658946	25.8	0.0073028	25.8	0.01062471	25.8	0.00339053
26	0.01299726	26	0.01707677	26	0.01136168	26	0.01640579	26	0.00843238	26	0.00697729	26	0.00848714	26	0.00964351	26	0.0075044	26	0.01214173	26	0.00947458	26	0.0145497	26	0.00737995	26	0.01151869	26	0.00981426	26	0.0036713
26.2	0.02350672	26.2	0.01835274	26.2	0.01315363	26.2	0.01822158	26.2	0.01285744	26.2	0.00787268	26.2	0.00793592	26.2	0.01055294	26.2	0.00893225	26.2	0.01116669	26.2	0.01366236	26.2	0.01162983	26.2	0.00261856	26.2	0.01058769	26.2	0.00724679	26.2	0.00249181
26.4	0.01989774	26.4	0.01702781	26.4	0.00854658	26.4	0.01908192	26.4	0.01118171	26.4	0.00631278	26.4	0.00999018	26.4	0.01229651	26.4	0.01395961	26.4	0.00617209	26.4	0.01346844	26.4	0.01290899	26.4	0.01278064	26.4	0.00702294	26.4	0.01106592	26.4	0.00710535
26.6	0.01500387	26.6	0.0189803	26.6	0.00610787	26.6	0.01888972	26.6	0.01189913	26.6	0.00595688	26.6	0.00679151	26.6	0.01146557	26.6	0.00767034	26.6	0.01309196	26.6	0.00830647	26.6	0.01673611	26.6	0.00683942	26.6	0.01122541	26.6	0.01124408	26.6	0.00256052
26.8	0.01781493	26.8	0.02254383	26.8	0.00959645	26.8	0.01804658	26.8	0.01328646	26.8	0.01248018	26.8	0.0050646	26.8	0.01112875	26.8	0.00821551	26.8	0.00784856	26.8	0.00468924	26.8	0.01690105	26.8	0.00433382	26.8	0.00998514	26.8	0.01229844	26.8	0.00367286
27	0.01748461	27	0.01990837	27	0.01232436	27	0.01989309	27	0.00851123	27	0.00677367	27	0.00639285	27	0.00976885	27	0.01205177	27	0.01143428	27	0.01044442	27	0.01771031	27	0.00457055	27	0.0114504	27	0.01049166	27	0.00183582
27.2	0.018596	27.2	0.0178167	27.2	0.00637342	27.2	0.02237313	27.2	0.00791753	27.2	0.00782732	27.2	0.00850378	27.2	0.01209498	27.2	0.00726164	27.2	0.01115499	27.2	0.01069152	27.2	0.01720762	27.2	0.00806957	27.2	0.00830372	27.2	0.01145997	27.2	0.00559752
27.4	0.01759175	27.4	0.01812607	27.4	0.00804682	27.4	0.02145237	27.4	0.0139017	27.4	0.01037607	27.4	0.00648306	27.4	0.011244	27.4	0.00935343	27.4	0.01175349	27.4	0.0104593	27.4	0.01610784	27.4	0.00631846	27.4	0.0138851	27.4	0.01369581	27.4	0.002668
27.6	0.01631475	27.6	0.02075648	27.6	0.00590283	27.6	0.01891802	27.6	0.01112311	27.6	0.01108607	27.6	0.00654906	27.6	0.01041504	27.6	0.01034625	27.6	0.01140308	27.6	0.0103879	27.6	0.0195949	27.6	0.00497666	27.6	0.01067333	27.6	0.01030229	27.6	-0.00062234
27.8	0.0175971	27.8	0.02129192	27.8	0.00620102	27.8	0.02323487	27.8	0.01508159	27.8	0.01022335	27.8	0.00811717	27.8	0.01197124	27.8	0.00802866	27.8	0.00882743	27.8	0.00852696	27.8	0.01539039	27.8	0.0029967	27.8	0.01123656	27.8	0.00867745	27.8	-0.00019646
28	0.01810549	28	0.01682435	28	0.00551347	28	0.01625268	28	0.01587037	28	0.01387797	28	0.00960682	28	0.00731167	28	0.00916848	28	0.00643311	28	0.00882205	28	0.01308741	28	0.00306246	28	0.0162726	28	0.01252068	28	0.00272035
28.2	0.01763007	28.2	0.01826714	28.2	0.00328196	28.2	0.02333601	28.2	0.01262971	28.2	0.0078683	28.2	0.00212744	28.2	0.00931398	28.2	0.00838176	28.2	0.01281022	28.2	0.00961237	28.2	0.01328142	28.2	0.00471654	28.2	0.01075043	28.2	0.00979073	28.2	0.00214239
28.4	0.01648863	28.4	0.02266527	28.4	0.00543964	28.4	0.01884985	28.4	0.01173736	28.4	0.00875417	28.4	0.00792973	28.4	0.0129995	28.4	0.01041957	28.4	0.00632345	28.4	0.00985274	28.4	0.02023633	28.4	0.00922775	28.4	0.00627653	28.4	0.009341	28.4	0.005269
28.6	0.01846489	28.6	0.01974403	28.6	0.0099712	28.6	0.02024213	28.6	0.00799858	28.6	0.0130212	28.6	0.00943185	28.6	0.01314957	28.6	0.01016785	28.6	0.01133303	28.6	0.01019061	28.6	0.02504562	28.6	0.00993766	28.6	0.01699307	28.6	0.00934344	28.6	0.00356883
28.8	0.01534943	28.8	0.02108723	28.8	0.00802488	28.8	0.02191982	28.8	0.0066799	28.8	0.01173945	28.8	0.00924025	28.8	0.01184782	28.8	0.0105904	28.8	0.00906818	28.8	0.01121324	28.8	0.01499356	28.8	0.00678236	28.8	0.01036608	28.8	0.00956477	28.8	0.00350001
29	0.01955101	29	0.01555468	29	0.00435251	29	0.01776315	29	0.00696634	29	0.01204934	29	0.0066707	29	0.0115849	29	0.00923026	29	0.01162468	29	0.00883543	29	0.0172451	29	0.00827473	29	0.01219461	29	0.01190451	29	0.00730583
29.2	0.02002508	29.2	0.0223198	29.2	0.00997636	29.2	0.02332379	29.2	0.01086146	29.2	0.01296107	29.2	0.01166148	29.2	0.00870587	29.2	0.00796406	29.2	0.01060901	29.2	0.01300807	29.2	0.01383904	29.2	0.00401103	29.2	0.01172893	29.2	0.00713417	29.2	0.00059397
29.4	0.01699123	29.4	0.02330791	29.4	0.00809439	29.4	0.02283459	29.4	0.01276626	29.4	0.01083485	29.4	0.01061562	29.4	0.01236907	29.4	0.00811537	29.4	0.01481997	29.4	0.01446481	29.4	0.01608868	29.4	0.00131902	29.4	0.01183855	29.4	0.00922524	29.4	-0.00308465
29.6	0.01353401	29.6	0.02299346	29.6	0.00775151	29.6	0.02025916	29.6	0.00956779	29.6	0.00913135	29.6	0.00773268	29.6	0.00971743	29.6	0.00953881	29.6	0.01120803	29.6	0.01199845	29.6	0.01466497	29.6	0.00609924	29.6	0.01064807	29.6	0.00985509	29.6	-0.00125369
29.8	0.01731969	29.8	0.01466521	29.8	0.00775749	29.8	0.01893411	29.8	0.01013494	29.8	0.01349677	29.8	0.00680822	29.8	0.0132916	29.8	0.00973347	29.8	0.00948839	29.8	0.01384204	29.8	0.0163018	29.8	0.00690034	29.8	0.01097444	29.8	0.01124343	29.8	0.0001363
30	0.01985825	30	0.019708	30	0.00618928	30	0.01842374	30	0.00926981	30	0.00273213	30	0.00641462	30	0.01225745	30	0.00853761	30	0.00694188	30	0.01459087	30	0.01755923	30	0.00928602	30	0.01402009	30	0.01156435	30	0.0039288
30.2	0.01622827	30.2	0.02173244	30.2	0.00856105	30.2	0.02448976	30.2	0.00750261	30.2	0.01185423	30.2	0.00695767	30.2	0.01326086	30.2	0.01184052	30.2	0.01221475	30.2	0.0091253	30.2	0.0140727	30.2	0.00363348	30.2	0.00924712	30.2	0.00958376	30.2	0.00559137
30.4	0.0167085	30.4	0.02435629	30.4	0.0097148	30.4	0.02214441	30.4	0.01073274	30.4	0.00705154	30.4	0.00477313	30.4	0.01344045	30.4	0.00924831	30.4	0.00947445	30.4	0.01184348	30.4	0.017865	30.4	0.00342529	30.4	0.01142712	30.4	0.01045918	30.4	-0.00021951
30.6	0.02349825	30.6	0.01742618	30.6	0.0104661	30.6	0.02245431	30.6	0.01014615	30.6	0.0093464	30.6	0.00731219	30.6	0.0131716	30.62	0.01018264	30.62	0.0093611	30.62	0.01572786	30.62	0.01470421	30.62	0.00799228	30.62	0.01294312	30.62	0.00781941	30.62	-0.00089159
30.8	0.01796623	30.8	0.02008829	30.8	0.01132002	30.8	0.01827425	30.8	0.01126132	30.8	0.01053768	30.8	0.00640934	30.8	0.0113968	30.8	0.00930299	30.8	0.01171187	30.8	0.0093183	30.8	0.01263927	30.8	0.0072946	30.8	0.009118	30.8	0.01137994	30.8	0.00342847
31	0.01921503	31	0.02068835	31	0.01078588	31	0.02069777	31	0.01282253	31	0.01498361	31	0.0066747	31	0.01031538	31	0.0066792	31	0.01449507	31	0.01392957	31	0.0165412	31	0.00298643	31	0.00806514	31	0.0123341	31	0.0031501
31.2	0.02358007	31.2	0.02147725	31.2	0.01066869	31.2	0.01908047	31.2	0.00922628	31.2	0.01128118	31.2	0.00695441	31.2	0.01297901	31.2	0.01199818	31.2	0.01263582	31.2	0.01132277	31.2	0.01576461	31.2	0.0050721	31.2	0.01002472	31.2	0.01580022	31.2	0.0034252
31.4	0.02209004	31.4	0.01813528	31.4	0.0050148	31.4	0.01892396	31.4	0.01167677	31.4	0.00879933	31.4	0.00970051	31.4	0.01273798	31.4	0.00969658	31.4	0.00844068	31.4	0.01026791	31.4	0.01383819	31.4	0.01346306	31.4	0.01060646	31.4	0.012658	31.4	0.00215488
31.6	0.01745998	31.6	0.01930922	31.6	0.00740974	31.6	0.01864286	31.6	0.00774067	31.6	0.01021376	31.6	0.00963913	31.6	0.01521213	31.6	0.0139986	31.6	0.01364215	31.6	0.01456414	31.6	0.01599639	31.6	0.00679256	31.6	0.01260572	31.6	0.00886163	31.6	0.00179116
31.8	0.02246939	31.8	0.02457649	31.8	0.00976185	31.8	0.01848492	31.8	0.01151604	31.8	0.01284063	31.8	0.00494391	31.8	0.01058597	31.8	0.01134376	31.8	0.01165577	31.8	0.01285624	31.8	0.01973559	31.8	0.0044348	31.8	0.00964154	31.8	0.01272365	31.8	0.00010575
32	0.01870196	32	0.02447217	32	0.00765531	32	0.01843499	32	0.01310554	32	0.01288552	32	0.00223343	32	0.00721715	32	0.00874464	32	0.00987314	32	0.01341536	32	0.01573302	32	0.00655482	32	0.01210998	32	0.008201	32	0.00106998
32.2	0.02068296	32.2	0.02205646	32.2	0.00486554	32.2	0.01857257	32.2	0.01082031	32.2	0.00845359	32.2	0.00731771	32.2	0.0110026	32.2	0.01201612	32.2	0.00782878	32.2	0.01318539	32.2	0.01549847	32.2	0.00781348	32.2	0.01479001	32.2	0.01348063	32.2	0.00111985
32.4	0.01891816	32.4	0.02126748	32.4	0.00713529	32.4	0.0197376	32.4	0.00971142	32.4	0.01200112	32.4	0.00621258	32.4	0.01296685	32.4	0.0073943	32.4	0.01308193	32.4	0.00937756	32.4	0.01650191	32.4	0.00528633	32.4	0.0162912	32.4	0.01073082	32.4	0.00211058
32.6	0.02139745	32.6	0.02444979	32.6	0.0090735	32.6	0.02071323	32.6	0.00800437	32.6	0.00789235	32.6	0.00938867	32.6	0.01248809	32.6	0.01242469	32.6	0.01350332	32.6	0.01094533	32.6	0.01742464	32.6	0.00996403	32.6	0.01212345	32.6	0.00921058	32.6	0.00119021
32.8	0.0217618	32.8	0.01810659	32.8	0.00826129	32.8	0.02193377	32.8	0.00680682	32.8	0.01039631	32.8	0.00468002	32.8	0.0093333	32.8	0.00963069	32.8	0.01440708	32.8	0.00897151	32.8	0.01476835	32.8	0.00262309	32.8	0.01436758	32.8	0.00909976	32.8	0.00759344
33	0.01722772	33	0.02095368	33	0.00689027	33	0.02132208	33	0.01417844	33	0.00979339	33	0.00813586	33	0.01183414	33.01	0.00625608	33.01	0.01132066	33.01	0.01175173	33.01	0.01985239	33.01	0.00801832	33.01	0.01475163	33.01	0.01409001	33.01	0.00138301
33.2	0.02343422	33.2	0.02093388	33.2	0.00501201	33.2	0.02111668	33.2	0.00936564	33.2	0.00537832	33.2	0.00587587	33.2	0.01191339	33.2	0.01011592	33.2	0.01453413	33.2	0.00969451	33.2	0.01871564	33.2	0.00969194	33.2	0.00888115	33.2	0.01263028	33.2	0.00467938
33.4	0.01914856	33.4	0.02046479	33.4	0.01057418	33.4	0.02053275	33.4	0.00400011	33.4	0.00740912	33.4	0.0047092	33.4	0.01028631	33.4	0.01212879	33.4	0.00904409	33.4	0.00814625	33.4	0.01869134	33.4	0.00793899	33.4	0.01526047	33.4	0.01354543	33.4	0.00450767
33.6	0.01952968	33.6	0.0190066	33.6	0.00967734	33.6	0.02299328	33.6	0.00917743	33.6	0.01157551	33.6	0.00716501	33.6	0.0127997	33.6	0.01060075	33.6	0.01324325	33.6	0.01342768	33.6	0.01688723	33.6	0.00446268	33.6	0.01263328	33.6	0.01184421	33.6	0.00450258
33.8	0.02034101	33.8	0.01489275	33.8	0.00831885	33.8	0.02324983	33.8	0.01255318	33.8	0.013367	33.8	0.01125151	33.8	0.01436142	33.8	0.01029771	33.8	0.01347147	33.8	0.00613382	33.8	0.01767872	33.8	0.00531941	33.8	0.01490415	33.8	0.01286374	33.8	0.00269549
34	0.01938237	34	0.01879019	34	0.00673145	34	0.0167242	34	0.0114036	34	0.01480433	34	0.00652952	34	0.00915398	34	0.01061212	34	0.01414537	34	0.01134601	34	0.02041747	34	0.00613419	34	0.01485516	34	0.01116111	34	0.00659075
34.2	0.01925958	34.2	0.02400669	34.2	0.00668722	34.2	0.02357529	34.2	0.0085555	34.2	0.00938856	34.2	0.00492081	34.2	0.01099455	34.2	0.00728272	34.2	0.01203612	34.2	0.006699	34.2	0.01763228	34.2	0.00628692	34.2	0.01580431	34.2	0.01274372	34.2	-0.0000633
34.4	0.01711638	34.4	0.02575609	34.4	0.00627068	34.4	0.02393333	34.4	0.01161037	34.4	0.01016241	34.4	0.00533518	34.4	0.0147547	34.4	0.00909467	34.4	0.01242829	34.4	0.01337384	34.4	0.01804725	34.4	0.00684811	34.4	0.00893558	34.4	0.01616448	34.4	-0.00043008
34.6	0.01974342	34.6	0.02000627	34.6	0.01412719	34.6	0.02216799	34.6	0.00478364	34.6	0.00876599	34.6	0.0072744	34.6	0.01014285	34.6	0.0066715	34.6	0.01162809	34.6	0.01169767	34.6	0.01886928	34.6	0.00087618	34.6	0.01731849	34.6	0.00873188	34.6	0.00424337
34.8	0.02364044	34.8	0.02278508	34.8	0.01036477	34.8	0.02099334	34.8	0.01010552	34.8	0.00905274	34.8	0.00832361	34.8	0.00931329	34.8	0.01178347	34.8	0.01423446	34.8	0.01118372	34.8	0.01442065	34.8	0.00529899	34.8	0.01445949	34.8	0.0093724	34.8	0.00375999
35	0.01741717	35	0.01888809	35	0.0111858	35	0.01818243	35	0.01289068	35	0.01456376	35	0.00260954	35	0.0140629	35	0.00973551	35	0.01037756	35	0.01177708	35	0.01818504	35	0.00022994	35	0.01207396	35	0.00939359	35	-0.00032065
35.2	0.02073213	35.2	0.02208577	35.2	0.00355048	35.2	0.02064601	35.2	0.00260003	35.2	0.00530613	35.2	0.00466708	35.2	0.01226317	35.2	0.01281997	35.2	0.01265255	35.2	0.01324253	35.2	0.01465666	35.2	0.00747005	35.2	0.0144959	35.2	0.00874887	35.2	0.00514991
35.4	0.01909829	35.4	0.02154228	35.4	0.00658821	35.4	0.02053624	35.4	0.00946986	35.4	0.01024612	35.4	0.00597431	35.4	0.01153153	35.4	0.00775745	35.4	0.00789823	35.4	0.01142879	35.4	0.01686409	35.4	0.00797939	35.4	0.01722407	35.4	0.00993439	35.4	-0.00014944
35.6	0.01872141	35.6	0.02012603	35.6	0.00874539	35.6	0.02001549	35.6	0.00711045	35.6	0.01030671	35.6	0.00860207	35.6	0.01549558	35.61	0.01429613	35.61	0.0123129	35.61	0.01707865	35.61	0.01443934	35.61	0.00546063	35.61	0.01451055	35.61	0.0097546	35.61	0.00621555
35.8	0.01870053	35.8	0.01834644	35.8	0.00688468	35.8	0.02372734	35.8	0.01185593	35.8	0.01034121	35.8	0.00412235	35.8	0.0107	35.8	0.01022108	35.8	0.01396837	35.8	0.01171073	35.8	0.01553667	35.8	0.00858478	35.8	0.01150708	35.8	0.01353808	35.8	0.00516174
36	0.02256059	36	0.01699429	36	0.00822651	36	0.02017608	36	0.01030804	36	0.01006631	36	0.0078923	36	0.00794256	36	0.01312129	36	0.01245662	36	0.01152608	36	0.02041859	36	0.00693655	36	0.01808641	36	0.01221104	36	0.00204528
36.2	0.01810146	36.2	0.02202049	36.2	0.00911998	36.2	0.02033833	36.2	0.00729242	36.2	0.00902751	36.2	0.00647704	36.2	0.01368442	36.2	0.01334192	36.2	0.01235221	36.2	0.01072918	36.2	0.02194941	36.2	0.00757773	36.2	0.0157149	36.2	0.0167377	36.2	-0.00101449
36.4	0.01857349	36.4	0.02506411	36.4	0.00939342	36.4	0.01762532	36.4	0.00485757	36.4	0.00745262	36.4	0.00902725	36.4	0.01140242	36.4	0.01163117	36.4	0.00897308	36.4	0.01182632	36.4	0.01865002	36.4	0.00609775	36.4	0.01707398	36.4	0.01087485	36.4	0.00237292
36.6	0.01817886	36.6	0.01890216	36.6	0.00757571	36.6	0.0192386	36.6	0.01171185	36.6	0.01105048	36.6	0.00408626	36.6	0.01363327	36.6	0.01344982	36.6	0.01211285	36.6	0.01297755	36.6	0.01891166	36.6	0.00516261	36.6	0.01572166	36.6	0.00909548	36.6	0.00331845
36.8	0.02314649	36.8	0.01852336	36.8	0.00807295	36.8	0.02079086	36.8	0.00958591	36.8	0.00749405	36.8	0.01037607	36.8	0.00854131	36.8	0.01262442	36.8	0.01579206	36.8	0.0157809	36.8	0.01810361	36.8	0.00651278	36.8	0.01414061	36.8	0.00668945	36.8	0.0043487
37	0.02093402	37	0.02450015	37	0.00956708	37	0.0209355	37	0.00738615	37	0.01135164	37	0.00391657	37	0.00773047	37	0.00779643	37	0.01005244	37	0.01353457	37	0.0159824	37	0.01095576	37	0.01694166	37	0.01416321	37	0.00827349
37.2	0.01652846	37.2	0.02231547	37.2	0.00918426	37.2	0.02196469	37.2	0.00791524	37.2	0.01220998	37.2	0.0082295	37.2	0.00913406	37.2	0.01576046	37.2	0.01263713	37.2	0.01237242	37.2	0.01930522	37.2	0.00629908	37.2	0.01174573	37.2	0.01097685	37.2	0.00057476
37.4	0.02145239	37.4	0.02044317	37.4	0.00802217	37.4	0.02143541	37.4	0.01359755	37.4	0.01148379	37.4	0.00622413	37.4	0.01158639	37.4	0.01160877	37.4	0.01271333	37.4	0.01008785	37.4	0.02020768	37.4	0.00829257	37.4	0.01569392	37.4	0.01054395	37.4	0.00026259
37.6	0.01656081	37.6	0.01788858	37.6	0.00470058	37.6	0.01918567	37.6	0.01040309	37.6	0.01252943	37.6	0.00618523	37.6	0.00946997	37.6	0.01562135	37.6	0.01365004	37.6	0.01200379	37.6	0.01849519	37.6	0.00679968	37.6	0.01108474	37.6	0.01634709	37.6	0.00029103
37.8	0.02492457	37.8	0.01708372	37.8	0.00925456	37.8	0.01993834	37.8	0.01165792	37.8	0.01011025	37.8	0.00870595	37.8	0.01317275	37.8	0.01793385	37.8	0.01361174	37.8	0.01812129	37.8	0.02301961	37.8	0.00736731	37.8	0.01177713	37.8	0.01199795	37.8	0.00313551
38	0.02052861	38	0.02097086	38	0.01139727	38	0.01819215	38	0.01041236	38	0.00991311	38	0.00669065	38	0.01017627	38	0.01281004	38	0.01605266	38	0.00674825	38	0.0207273	38	0.0093968	38	0.01812313	38	0.00883319	38	0.00234469
38.2	0.01965231	38.2	0.02001998	38.2	0.00782702	38.2	0.02021012	38.2	0.00692975	38.2	0.01087198	38.2	0.00873362	38.2	0.0092699	38.2	0.00834147	38.2	0.01058129	38.2	0.00760616	38.2	0.02219465	38.2	0.01129185	38.2	0.01512481	38.2	0.01533713	38.2	0.00161658
38.4	0.01599715	38.4	0.02116862	38.4	0.00666387	38.4	0.02156921	38.4	0.00958037	38.4	0.01270706	38.4	0.00530877	38.4	0.01196949	38.4	0.0114315	38.4	0.00994134	38.4	0.01021361	38.4	0.01936369	38.4	0.00708532	38.4	0.01570235	38.4	0.00869028	38.4	0.00539772
38.6	0.02144006	38.6	0.024421	38.6	0.01061563	38.6	0.01802316	38.6	0.00959874	38.6	0.01138322	38.6	0.00754905	38.6	0.01253714	38.6	0.01515272	38.6	0.01201253	38.6	0.01402944	38.6	0.01564039	38.6	0.01001621	38.6	0.01711832	38.6	0.01233827	38.6	0.00693907
38.8	0.0212134	38.8	0.02069971	38.8	0.00778392	38.8	0.01766643	38.8	0.00658285	38.8	0.00774805	38.8	0.00616868	38.8	0.01212994	38.8	0.01165264	38.8	0.0139412	38.8	0.01178212	38.8	0.01661669	38.8	0.00931975	38.8	0.01481731	38.8	0.01197676	38.8	0.00296338
39	0.02244397	39	0.01847913	39	0.00926881	39	0.0222358	39	0.00958262	39	0.0103967	39	0.00662774	39	0.01299716	39	0.0148734	39	0.01292842	39	0.01363773	39	0.01593002	39	0.0088071	39	0.01626591	39	0.01194447	39	0.00513713
39.2	0.01731127	39.2	0.02285345	39.2	0.00685946	39.2	0.01797984	39.2	0.00662278	39.2	0.01037938	39.2	0.00819167	39.2	0.01418674	39.2	0.01484569	39.2	0.01322168	39.2	0.0125718	39.2	0.01640753	39.2	0.00623554	39.2	0.01126285	39.2	0.01008896	39.2	0.00426657
39.4	0.01852342	39.4	0.01988788	39.4	0.00931952	39.4	0.01845919	39.4	0.00695923	39.4	0.01129743	39.4	0.00440191	39.4	0.00958816	39.4	0.0110552	39.4	0.01095607	39.4	0.01183576	39.4	0.01914049	39.4	0.00611925	39.4	0.01118549	39.4	0.01262152	39.4	0.0047512
39.6	0.02411844	39.6	0.0185862	39.6	0.00814145	39.6	0.02427026	39.6	0.00796651	39.6	0.01160607	39.6	0.00659554	39.6	0.0100774	39.6	0.01175767	39.6	0.01376623	39.6	0.01530189	39.6	0.01641443	39.6	0.01001956	39.6	0.01672064	39.6	0.01094981	39.6	0.00648894
39.8	0.01887596	39.8	0.02554392	39.8	0.01199453	39.8	0.01982939	39.8	0.00910557	39.8	0.01042325	39.8	0.00596762	39.8	0.013274	39.8	0.01151161	39.8	0.01478543	39.8	0.016585	39.8	0.01955682	39.8	0.0061616	39.8	0.0150105	39.8	0.00898731	39.8	0.00271363
40	0.02252663	40	0.02836827	40	0.00933374	40	0.02401132	40	0.01089679	40	0.00894106	40	0.00551051	40	0.00843933	40	0.01487861	40	0.01406955	40	0.01311359	40	0.01734444	40	0.00599522	40	0.01386842	40	0.01568189	40	0.00644025
40.2	0.01766472	40.2	0.02588161	40.2	0.01082194	40.2	0.02402635	40.2	0.00903069	40.2	0.00787376	40.2	0.00752004	40.2	0.01334798	40.2	0.01476163	40.2	0.01356923	40.2	0.01880107	40.2	0.01599918	40.2	0.00964475	40.2	0.01371839	40.2	0.01269048	40.2	0.00386231
40.4	0.01933556	40.4	0.02107492	40.4	0.00894234	40.4	0.02162944	40.4	0.00670789	40.4	0.01227005	40.4	0.00479557	40.4	0.01054612	40.4	0.01215521	40.4	0.013396	40.4	0.01674755	40.4	0.02090721	40.4	0.01128177	40.4	0.0170334	40.4	0.01002305	40.4	0.00054314
40.6	0.02150386	40.6	0.02213504	40.6	0.0045942	40.6	0.01994168	40.6	0.00650747	40.6	0.00656066	40.6	0.00702212	40.6	0.01409465	40.6	0.0117407	40.6	0.01248305	40.6	0.00946358	40.6	0.01821417	40.6	0.01118948	40.6	0.01108016	40.6	0.01317953	40.6	0.00203092
40.8	0.02291753	40.8	0.025415	40.8	0.00735511	40.8	0.02283546	40.8	0.01045666	40.8	0.01254932	40.8	0.00456831	40.8	0.01336617	40.8	0.01526723	40.8	0.01119837	40.8	0.01639781	40.8	0.01446185	40.8	0.00910896	40.8	0.01393892	40.8	0.01366476	40.8	0.00759601
41	0.02158284	41	0.01922842	41	0.01432489	41	0.02468606	41	0.01045236	41	0.01050432	41	0.00219105	41	0.00934736	41	0.01400278	41	0.01948835	41	0.01445123	41	0.01912564	41	0.01136726	41	0.01664369	41	0.01389883	41	0.00821953
41.2	0.02389731	41.2	0.02480964	41.2	0.00967022	41.2	0.01822525	41.2	0.01099817	41.2	0.01245221	41.2	0.00717473	41.2	0.01000568	41.2	0.01209118	41.2	0.01330112	41.2	0.01217971	41.2	0.01886109	41.2	0.01233435	41.2	0.01638896	41.2	0.01671698	41.2	0.00313634
41.4	0.0196276	41.4	0.01806775	41.4	0.00647052	41.4	0.01952103	41.4	0.005339	41.4	0.01461531	41.4	0.00713197	41.4	0.01183537	41.4	0.01218205	41.4	0.01352168	41.4	0.01483664	41.4	0.01891552	41.4	0.01039082	41.4	0.01295798	41.4	0.01062056	41.4	0.00181621
41.6	0.02183006	41.6	0.02095809	41.6	0.00638336	41.6	0.02158573	41.6	0.01021815	41.6	0.01653545	41.6	0.00763722	41.6	0.01166655	41.6	0.01597921	41.6	0.01339108	41.6	0.01259217	41.6	0.02523128	41.6	0.00743479	41.6	0.01160418	41.6	0.01052237	41.6	0.00528997
41.8	0.02059704	41.8	0.02412945	41.8	0.00491452	41.8	0.02233424	41.8	0.01231388	41.8	0.00805104	41.8	0.01031899	41.8	0.01609818	41.8	0.01638929	41.8	0.01597847	41.8	0.01341408	41.8	0.0252016	41.8	0.01092407	41.8	0.01202311	41.8	0.01389569	41.8	0.00531321
42	0.01869169	42	0.02253477	42	0.01128541	42	0.01878273	42	0.00904955	42	0.01028258	42	0.0084414	42	0.01186674	42	0.0126648	42	0.01303115	42	0.01222056	42	0.01737829	42	0.01105949	42	0.01642227	42	0.0093132	42	0.00656047
42.2	0.02653684	42.2	0.02431795	42.2	0.01095007	42.2	0.02336774	42.2	0.00898963	42.2	0.01105674	42.2	0.00816522	42.2	0.01269721	42.2	0.00996013	42.2	0.01665601	42.2	0.01429153	42.2	0.01855616	42.2	0.00663422	42.2	0.01414347	42.2	0.01311278	42.2	0.00405049
42.4	0.02332059	42.4	0.02251826	42.4	0.01202	42.4	0.02171493	42.4	0.01231084	42.4	0.01037168	42.4	0.00759718	42.4	0.01016206	42.4	0.01680425	42.4	0.01287851	42.4	0.01617317	42.4	0.02023225	42.4	0.01159248	42.4	0.01693262	42.4	0.01045628	42.4	0.00340919
42.6	0.02469815	42.6	0.02228714	42.6	0.01056446	42.6	0.02218886	42.6	0.01001845	42.6	0.01434321	42.6	0.00175402	42.6	0.01543679	42.61	0.01397016	42.61	0.01596037	42.61	0.01377197	42.61	0.02068107	42.61	0.00814915	42.61	0.01601578	42.61	0.01600785	42.61	0.00599579
42.8	0.02152476	42.8	0.02452598	42.8	0.0093312	42.8	0.01941141	42.8	0.00976693	42.8	0.00748132	42.8	0.00980626	42.8	0.00836801	42.8	0.01570322	42.8	0.01699335	42.8	0.01713142	42.8	0.02123266	42.8	0.00983375	42.8	0.01547506	42.8	0.01139886	42.8	0.00833885
43	0.02183811	43	0.02456923	43	0.00971612	43	0.02268087	43	0.00494785	43	0.00571337	43	0.00848716	43	0.01324385	43	0.01599413	43	0.01621491	43	0.01822121	43	0.01469542	43	0.01243991	43	0.01411837	43	0.01237003	43	0.00282058
43.2	0.02199211	43.2	0.02299595	43.2	0.00542798	43.2	0.02219855	43.2	0.01008319	43.2	0.01000571	43.2	0.00861235	43.2	0.01233169	43.2	0.01260357	43.2	0.01474223	43.2	0.01059992	43.2	0.01768609	43.2	0.01124421	43.2	0.01796956	43.2	0.01044547	43.2	0.00129521
43.4	0.02219349	43.4	0.02635537	43.4	0.00818411	43.4	0.01683431	43.4	0.0084479	43.4	0.01078992	43.4	0.00437255	43.4	0.01269132	43.4	0.01756393	43.4	0.01337886	43.4	0.01436379	43.4	0.01813441	43.4	0.0092779	43.4	0.01300245	43.4	0.01426567	43.4	0.00306179
43.6	0.02294788	43.6	0.02202657	43.6	0.01196462	43.6	0.02104045	43.6	0.00947904	43.6	0.01503612	43.6	0.0067223	43.6	0.01032669	43.6	0.01203885	43.6	0.0150304	43.6	0.01374984	43.6	0.02304386	43.6	0.00910808	43.6	0.01537264	43.6	0.01218164	43.6	0.00568221
43.8	0.02100651	43.8	0.02078951	43.8	0.00844843	43.8	0.0220863	43.8	0.01111389	43.8	0.01102264	43.8	0.01204038	43.8	0.01066433	43.8	0.01654761	43.8	0.02004424	43.8	0.01918732	43.8	0.02295984	43.8	0.01204947	43.8	0.0127102	43.8	0.00937934	43.8	0.00250256
44	0.02324747	44	0.02642162	44	0.00941294	44	0.02078916	44	0.00829263	44	0.01262974	44	0.00243046	44	0.0099505	44	0.01675638	44	0.01363544	44	0.01930081	44	0.01770399	44	0.0096091	44	0.01447721	44	0.01197146	44	0.0026012
44.2	0.02389666	44.2	0.02315382	44.2	0.00813563	44.2	0.02184411	44.2	0.01119221	44.2	0.01547562	44.2	0.00786808	44.2	0.01275923	44.2	0.0106027	44.2	0.01314956	44.2	0.01359122	44.2	0.02011803	44.2	0.00663537	44.2	0.0141161	44.2	0.01652773	44.2	0.00454743
44.4	0.02345194	44.4	0.01998069	44.4	0.00885845	44.4	0.0198793	44.4	0.00909012	44.4	0.0150989	44.4	0.00595113	44.4	0.01053922	44.4	0.00863072	44.4	0.01626754	44.4	0.01555872	44.4	0.02192351	44.4	0.01184509	44.4	0.01415358	44.4	0.01300683	44.4	0.00250945
44.6	0.02213501	44.6	0.02741654	44.6	0.00483501	44.6	0.0199137	44.6	0.01227549	44.6	0.00899874	44.6	0.00747545	44.6	0.01141195	44.6	0.01172847	44.6	0.00876011	44.6	0.01240649	44.6	0.02068401	44.6	0.00672196	44.6	0.01428493	44.6	0.01105427	44.6	0.0053828
44.8	0.0224223	44.8	0.02134224	44.8	0.00716913	44.8	0.02287536	44.8	0.00842689	44.8	0.01214424	44.8	0.00512732	44.8	0.01563582	44.8	0.01477053	44.8	0.01402078	44.8	0.01569667	44.8	0.02174635	44.8	0.00730492	44.8	0.01548804	44.8	0.01123015	44.8	0.0046741
45	0.01888929	45	0.02278937	45	0.00955039	45	0.02096745	45	0.00924645	45	0.01086861	45	0.00545031	45	0.01175674	45	0.0122033	45	0.01522322	45	0.01204807	45	0.01698828	45	0.00849242	45	0.01050869	45	0.01498463	45	0.00370996
45.2	0.02501258	45.2	0.02175197	45.2	0.00646982	45.2	0.02223846	45.2	0.00599953	45.2	0.01710451	45.2	0.00369035	45.2	0.01301359	45.2	0.01451602	45.2	0.01512906	45.2	0.01239865	45.2	0.01976913	45.2	0.01447224	45.2	0.01325201	45.2	0.01112507	45.2	0.00698308
45.4	0.02089213	45.4	0.02356521	45.4	0.01054635	45.4	0.01890851	45.4	0.00915546	45.4	0.00948802	45.4	0.00525833	45.4	0.01229624	45.4	0.01501937	45.4	0.01615835	45.4	0.016675	45.4	0.02220209	45.4	0.00840063	45.4	0.01490225	45.4	0.01179794	45.4	0.00554343
45.6	0.0197804	45.6	0.01911155	45.6	0.01189927	45.6	0.01986244	45.6	0.00795931	45.6	0.00999306	45.6	0.00618621	45.6	0.01121539	45.6	0.01258211	45.6	0.01639996	45.6	0.01806216	45.6	0.01628954	45.6	0.00924521	45.6	0.01644447	45.6	0.01268091	45.6	0.00488934
45.8	0.01832678	45.8	0.02536693	45.8	0.00778966	45.8	0.01801878	45.8	0.01005165	45.8	0.01239331	45.8	0.01122589	45.8	0.01326516	45.8	0.01332538	45.8	0.01582019	45.8	0.01654361	45.8	0.01918849	45.8	0.00970199	45.8	0.01538085	45.8	0.01556173	45.8	0.00522526
46	0.01883106	46	0.02260063	46	0.00780188	46	0.02285748	46	0.00467668	46	0.00879131	46	0.00394161	46	0.00849159	46	0.01531935	46	0.01367738	46	0.0122726	46	0.02340352	46	0.01005147	46	0.01965543	46	0.01842683	46	0.00562846
46.2	0.01838626	46.2	0.02724265	46.2	0.01055304	46.2	0.0223789	46.2	0.00880735	46.2	0.01162553	46.2	0.0042751	46.2	0.01381078	46.2	0.01660756	46.2	0.01629478	46.2	0.01696833	46.2	0.01849805	46.2	0.00906842	46.2	0.01284415	46.2	0.01131305	46.2	0.00102988
46.4	0.01960973	46.4	0.02050122	46.4	0.00784196	46.4	0.02083533	46.4	0.01062531	46.4	0.00885098	46.4	0.00910997	46.4	0.01522017	46.4	0.01379383	46.4	0.01073051	46.4	0.01482557	46.4	0.02179293	46.4	0.01246967	46.4	0.01613967	46.4	0.01706148	46.4	0.00491732
46.6	0.01875111	46.6	0.02351271	46.6	0.00773072	46.6	0.01795985	46.6	0.00808357	46.6	0.00997561	46.6	0.00914476	46.6	0.01559316	46.6	0.01243278	46.6	0.01345183	46.6	0.0151072	46.6	0.01695066	46.6	0.01139218	46.6	0.01636683	46.6	0.01130658	46.6	0.00607207
46.8	0.01861295	46.8	0.02480919	46.8	0.00922589	46.8	0.02007712	46.8	0.01112177	46.8	0.01323627	46.8	0.00639757	46.8	0.00956599	46.8	0.014719	46.8	0.0199713	46.8	0.01299377	46.8	0.0219965	46.8	0.01264242	46.8	0.01510308	46.8	0.01066009	46.8	0.00176047
47	0.02033819	47	0.02373417	47	0.00795379	47	0.02444379	47	0.00845186	47	0.00982576	47	0.00800064	47	0.01007018	47	0.01562569	47	0.01881949	47	0.01543625	47	0.01676334	47	0.00962877	47	0.01440976	47	0.01584763	47	0.0035215
47.2	0.02678017	47.2	0.02449896	47.2	0.00532257	47.2	0.02411034	47.2	0.00864001	47.2	0.00956469	47.2	0.0064617	47.2	0.01192924	47.2	0.01071512	47.2	0.01582529	47.2	0.0179764	47.2	0.02121865	47.2	0.01032559	47.2	0.01708403	47.2	0.01506036	47.2	0.00155876
47.4	0.0170189	47.4	0.02164427	47.4	0.00780907	47.4	0.02216819	47.4	0.01220692	47.4	0.01408602	47.4	0.0087466	47.4	0.00996372	47.4	0.0125721	47.4	0.01200266	47.4	0.01677973	47.4	0.01822424	47.4	0.00931933	47.4	0.01498303	47.4	0.01092333	47.4	0.00383065
47.6	0.02313413	47.6	0.02243582	47.6	0.00767286	47.6	0.01416435	47.6	0.00947155	47.6	0.01304218	47.6	0.00868129	47.6	0.01197319	47.6	0.01748778	47.6	0.01148066	47.6	0.01457565	47.6	0.01768271	47.6	0.01140989	47.6	0.01384021	47.6	0.012697	47.6	0.00690535
47.8	0.02169648	47.8	0.02498533	47.8	0.00975679	47.8	0.0223412	47.8	0.00775188	47.8	0.00809827	47.8	0.00760704	47.8	0.01208777	47.8	0.01339781	47.8	0.01231944	47.8	0.01117643	47.8	0.01877471	47.8	0.01148998	47.8	0.01759877	47.8	0.01360294	47.8	0.00233022
48	0.02299202	48	0.02732432	48	0.01097404	48	0.01949651	48	0.01377933	48	0.01360836	48	0.00392039	48	0.01093356	48	0.01051633	48	0.01726777	48	0.01590395	48	0.0209103	48	0.01040626	48	0.01757962	48	0.01340501	48	0.00583235
48.2	0.01840777	48.2	0.02573341	48.2	0.00988831	48.2	0.01984457	48.2	0.00679291	48.2	0.01192732	48.2	0.00851848	48.2	0.01010258	48.2	0.01430145	48.2	0.01527465	48.2	0.01672434	48.2	0.02390908	48.2	0.00958128	48.2	0.01304166	48.2	0.01346092	48.2	0.00557098
48.4	0.02861691	48.4	0.02382147	48.4	0.01100322	48.4	0.02420541	48.4	0.00814646	48.4	0.01054447	48.4	0.00956472	48.4	0.00974382	48.4	0.01444209	48.4	0.01768657	48.4	0.01412133	48.4	0.02239349	48.4	0.00897851	48.4	0.01559026	48.4	0.00972225	48.4	0.00258856
48.6	0.02398646	48.6	0.02292549	48.6	0.00981772	48.6	0.02398782	48.6	0.01119386	48.6	0.01017511	48.6	0.00805359	48.6	0.01099024	48.6	0.01488605	48.6	0.0170102	48.6	0.01299996	48.6	0.0216033	48.6	0.00753729	48.6	0.01561138	48.6	0.01049403	48.6	0.00485936
48.8	0.02156083	48.8	0.02537554	48.8	0.01086105	48.8	0.02214407	48.8	0.00590644	48.8	0.01236749	48.8	0.00439958	48.8	0.01707046	48.8	0.02049737	48.8	0.01261641	48.8	0.01562715	48.8	0.02738232	48.8	0.01330729	48.8	0.01612223	48.8	0.00948228	48.8	0.00363629
49	0.02006755	49	0.02248093	49	0.00710984	49	0.01836047	49	0.00718629	49	0.00954718	49	0.00702109	49	0.00790941	49	0.01377385	49	0.01523664	49	0.01289557	49	0.01849443	49	0.01189382	49	0.01853785	49	0.01414219	49	0.00502277
49.2	0.02276884	49.2	0.02627666	49.2	0.00809411	49.2	0.0258467	49.2	0.01110437	49.2	0.01049568	49.2	0.00555489	49.2	0.01227607	49.2	0.01292009	49.2	0.01448744	49.2	0.01174396	49.2	0.02170374	49.2	0.00996045	49.2	0.01473582	49.2	0.01376463	49.2	0.00536166
49.4	0.02405377	49.4	0.03093804	49.4	0.00816651	49.4	0.02499907	49.4	0.00666332	49.4	0.01169472	49.4	0.00492869	49.4	0.00987554	49.4	0.01252708	49.4	0.01759398	49.4	0.01185831	49.4	0.01933919	49.4	0.01030459	49.4	0.01775246	49.4	0.01583938	49.4	0.00576882
49.6	0.02151893	49.6	0.02430879	49.6	0.01314261	49.6	0.0227529	49.6	0.00992522	49.6	0.01310076	49.6	0.0055027	49.6	0.01000264	49.61	0.0141897	49.61	0.01446861	49.61	0.01591709	49.61	0.02221528	49.61	0.01088473	49.61	0.0160039	49.61	0.01306024	49.61	0.00799613
49.8	0.0206628	49.8	0.02508815	49.8	0.00793488	49.8	0.0199729	49.8	0.01147773	49.8	0.00898072	49.8	0.00509163	49.8	0.00971045	49.8	0.01089072	49.8	0.0157854	49.8	0.01718755	49.8	0.02021182	49.8	0.00770994	49.8	0.01861527	49.8	0.01577156	49.8	0.00488948
50	0.0215964	50	0.02372144	50	0.00682867	50	0.02529363	50	0.01043868	50	0.01347855	50	0.00795573	50	0.01409444	50	0.01330628	50	0.01645282	50	0.01248178	50	0.01786581	50	0.00808608	50	0.02031584	50	0.01462446	50	0.00856027
50.2	0.01616846	50.2	0.02271543	50.2	0.0101398	50.2	0.02271176	50.2	0.0123438	50.2	0.00827556	50.2	0.00608751	50.2	0.0116267	50.2	0.0170652	50.2	0.01097576	50.2	0.01438965	50.2	0.02424011	50.2	0.01122238	50.2	0.01776521	50.2	0.01245685	50.2	0.00523606
50.4	0.02443495	50.4	0.02405592	50.4	0.01205768	50.4	0.02174054	50.4	0.01326103	50.4	0.01473542	50.4	0.00552987	50.4	0.01089431	50.4	0.01349565	50.4	0.01767779	50.4	0.01848502	50.4	0.01858346	50.4	0.00952606	50.4	0.01313839	50.4	0.01374561	50.4	0.00429034
50.6	0.02292078	50.6	0.0222028	50.6	0.00835479	50.6	0.02172174	50.6	0.00497499	50.6	0.01236279	50.6	0.00977634	50.6	0.01131521	50.6	0.01444546	50.6	0.0142444	50.6	0.01994618	50.6	0.01920909	50.6	0.01249869	50.6	0.01736608	50.6	0.01479733	50.6	0.00778816
50.8	0.02039518	50.8	0.02416556	50.8	0.00487796	50.8	0.02339682	50.8	0.0095241	50.8	0.00996937	50.8	0.00856084	50.8	0.01090944	50.8	0.02155348	50.8	0.01785732	50.8	0.01179923	50.8	0.0190945	50.8	0.01284209	50.8	0.01538202	50.8	0.01368011	50.8	0.00747928
51	0.02466068	51	0.0198965	51	0.01230234	51	0.02416067	51	0.00843171	51	0.00680549	51	0.00932821	51	0.01206647	51	0.01487744	51	0.01421029	51	0.01348114	51	0.02424998	51	0.0136862	51	0.01830162	51	0.01487491	51	0.00525171
51.2	0.01955492	51.2	0.02471666	51.2	0.00870098	51.2	0.01681114	51.2	0.00712424	51.2	0.0130991	51.2	0.01076694	51.2	0.01557879	51.2	0.01087512	51.2	0.02013302	51.2	0.0176847	51.2	0.01931538	51.2	0.01361893	51.2	0.01859053	51.2	0.01349122	51.2	0.00293125
51.41	0.0296669	51.41	0.02359869	51.41	0.00716063	51.41	0.02317931	51.41	0.00927738	51.41	0.01310565	51.41	0.01010013	51.41	0.01309272	51.4	0.01740829	51.4	0.0172189	51.4	0.01345413	51.4	0.02132324	51.4	0.01037602	51.4	0.01347229	51.4	0.01525466	51.4	0.00391503
51.6	0.02278911	51.6	0.02639315	51.6	0.01005634	51.6	0.02609089	51.6	0.01017545	51.6	0.01088112	51.6	0.00477364	51.6	0.00942808	51.6	0.01636527	51.6	0.01372464	51.6	0.01895065	51.6	0.0221701	51.6	0.01140372	51.6	0.01818702	51.6	0.01422423	51.6	0.00592104
51.8	0.02317804	51.8	0.02233745	51.8	0.00932566	51.8	0.02185594	51.8	0.00311543	51.8	0.01250934	51.8	0.0081268	51.8	0.01675578	51.8	0.01732444	51.8	0.01542161	51.8	0.01909169	51.8	0.02203195	51.8	0.01143513	51.8	0.01662221	51.8	0.01304829	51.8	0.00485238
52	0.02208252	52	0.02512081	52	0.00957831	52	0.02230285	52	0.01377803	52	0.01183202	52	0.00401435	52	0.01040475	52	0.01842015	52	0.01845664	52	0.01891866	52	0.02115532	52	0.00993948	52	0.02116707	52	0.01392683	52	0.00595391
52.2	0.02543435	52.2	0.02282342	52.2	0.00481998	52.2	0.02316335	52.2	0.00924515	52.2	0.0143098	52.2	0.00570277	52.2	0.01467694	52.22	0.01588974	52.22	0.01867991	52.22	0.01992089	52.22	0.0196292	52.22	0.00880729	52.22	0.01766309	52.22	0.01203685	52.22	0.00220969
52.4	0.02306041	52.4	0.02465545	52.4	0.01211574	52.4	0.02367577	52.4	0.00751959	52.4	0.01598442	52.4	0.00442302	52.4	0.00986664	52.4	0.0165486	52.4	0.01069676	52.4	0.02001826	52.4	0.02285532	52.4	0.01156335	52.4	0.01397495	52.4	0.01492366	52.4	0.00618064
52.6	0.02352381	52.6	0.02712156	52.6	0.0084896	52.6	0.01983009	52.6	0.00892284	52.6	0.01426279	52.6	0.00632602	52.6	0.01505507	52.6	0.01382035	52.6	0.01338232	52.6	0.01352749	52.6	0.02480748	52.6	0.01253475	52.6	0.01838762	52.6	0.01870868	52.6	0.00578886
52.8	0.01956256	52.8	0.02254587	52.8	0.0099292	52.8	0.02177288	52.8	0.00849257	52.8	0.01336731	52.8	0.00469016	52.8	0.01208711	52.8	0.01459215	52.8	0.01745426	52.8	0.0163987	52.8	0.02114748	52.8	0.012174	52.8	0.01664495	52.8	0.01254305	52.8	0.00264177
53	0.02704506	53	0.02726734	53	0.00671085	53	0.02173726	53	0.00871381	53	0.01152539	53	0.00898213	53	0.01179882	53	0.01699399	53	0.02009832	53	0.01492953	53	0.01798144	53	0.01169719	53	0.01846946	53	0.01221954	53	0.00798993
53.2	0.02179157	53.2	0.01949468	53.2	0.00994735	53.2	0.02327742	53.2	0.00868178	53.2	0.00813141	53.2	0.0043971	53.2	0.0138186	53.21	0.01410627	53.21	0.01726359	53.21	0.01801428	53.21	0.02554635	53.21	0.00623419	53.21	0.01770648	53.21	0.01642332	53.21	0.00473231
53.4	0.02115565	53.4	0.02301439	53.4	0.00930538	53.4	0.01960195	53.4	0.00603619	53.4	0.00808728	53.4	0.00809351	53.4	0.01101377	53.4	0.01384706	53.4	0.01214046	53.4	0.01813141	53.4	0.0224817	53.4	0.01053309	53.4	0.0204076	53.4	0.01655324	53.4	0.00375735
53.6	0.018311	53.6	0.02726929	53.6	0.00816981	53.6	0.02249211	53.6	0.00971408	53.6	0.01497375	53.6	0.00570045	53.6	0.01217854	53.6	0.01359223	53.6	0.01601601	53.6	0.01655095	53.6	0.02346273	53.6	0.01045076	53.6	0.01834484	53.6	0.01033677	53.6	0.00206434
53.8	0.02314535	53.8	0.02026815	53.8	0.00874254	53.8	0.0249701	53.8	0.0109955	53.8	0.013493	53.8	0.00814142	53.8	0.01475516	53.8	0.01138978	53.8	0.01821739	53.8	0.01677669	53.8	0.0224791	53.8	0.01159243	53.8	0.02016915	53.8	0.01165292	53.8	0.00151739
54	0.02339859	54	0.02017235	54	0.00764818	54	0.0279506	54	0.01150977	54	0.01149627	54	0.00755522	54	0.0128836	54	0.01092874	54	0.02014314	54	0.01160958	54	0.02419333	54	0.01105462	54	0.01483964	54	0.01235548	54	0.00717042
54.2	0.02227876	54.2	0.02451952	54.2	0.00566144	54.2	0.02555961	54.2	0.01075836	54.2	0.01096027	54.2	0.00541972	54.2	0.01314706	54.2	0.01944193	54.2	0.01082815	54.2	0.01781098	54.2	0.02059432	54.2	0.01183705	54.2	0.01857489	54.2	0.01217322	54.2	0.00393324
54.4	0.01855675	54.4	0.02655135	54.4	0.00746944	54.4	0.02244454	54.4	0.00916487	54.4	0.01299501	54.4	0.00732942	54.4	0.01340412	54.4	0.01338079	54.4	0.01678612	54.4	0.02033475	54.4	0.02122461	54.4	0.01030877	54.4	0.01884238	54.4	0.01156311	54.4	0.00449649
54.6	0.01975214	54.6	0.02109871	54.6	0.00913667	54.6	0.02049342	54.6	0.01245101	54.6	0.00920801	54.6	0.00884821	54.6	0.01580112	54.6	0.01656959	54.6	0.01583798	54.6	0.01978276	54.6	0.02317337	54.6	0.01174656	54.6	0.01973404	54.6	0.01588024	54.6	0.00437508
54.8	0.024071	54.8	0.02365605	54.8	0.00657654	54.8	0.02324389	54.8	0.01116746	54.8	0.00795294	54.8	0.00715744	54.8	0.01446831	54.8	0.01525949	54.8	0.01674771	54.8	0.01761071	54.8	0.02433692	54.8	0.01256032	54.8	0.01334826	54.8	0.01125793	54.8	0.00626096
55	0.02160608	55	0.02617677	55	0.00926668	55	0.02437729	55	0.00871133	55	0.00709436	55	0.00824256	55	0.01100731	55	0.01503427	55	0.01694675	55	0.01507774	55	0.02280318	55	0.00876637	55	0.02060916	55	0.01112914	55	0.00570237
55.2	0.02187176	55.2	0.01999302	55.2	0.01290803	55.2	0.02612227	55.2	0.01133587	55.2	0.01138822	55.2	0.00515404	55.2	0.01143839	55.2	0.01161334	55.2	0.01653038	55.2	0.01256946	55.2	0.02866891	55.2	0.01305039	55.2	0.01785457	55.2	0.01239582	55.2	0.00542027
55.4	0.02312735	55.4	0.01970246	55.4	0.01514394	55.4	0.02164936	55.4	0.01414415	55.4	0.01174925	55.4	0.00804575	55.4	0.01222674	55.4	0.01317448	55.4	0.01835776	55.4	0.01629692	55.4	0.02017947	55.4	0.00783713	55.4	0.01491685	55.4	0.01238617	55.4	0.00411012
55.6	0.02179757	55.6	0.02687366	55.6	0.0118059	55.6	0.02194382	55.6	0.00994469	55.6	0.01256316	55.6	0.00641302	55.6	0.01403291	55.6	0.01816663	55.6	0.00958925	55.6	0.01593747	55.6	0.02263779	55.6	0.00867349	55.6	0.01276309	55.6	0.01609075	55.6	-0.00037992
55.8	0.01953281	55.8	0.0247141	55.8	0.00968522	55.8	0.02358222	55.8	0.01175004	55.8	0.01539764	55.8	0.00677401	55.8	0.01763918	55.8	0.01464737	55.8	0.01410679	55.8	0.01643562	55.8	0.02081293	55.8	0.00703268	55.8	0.01902178	55.8	0.01420666	55.8	-0.00030605
56	0.02490052	56	0.02491767	56	0.0092974	56	0.02046084	56	0.00902307	56	0.01125745	56	0.007028	56	0.01904573	56	0.01065318	56	0.01500957	56	0.01492961	56	0.02336719	56	0.01462209	56	0.01255869	56	0.01061079	56	0.00662841
56.2	0.02390022	56.2	0.01887343	56.2	0.01289345	56.2	0.01685588	56.2	0.01179332	56.2	0.00807576	56.2	0.00641688	56.2	0.01047049	56.2	0.01342237	56.2	0.01429026	56.2	0.02108066	56.2	0.02040558	56.2	0.01077934	56.2	0.01603015	56.2	0.00943022	56.2	0.00457977
56.4	0.0237273	56.4	0.02266612	56.4	0.00794992	56.4	0.02567338	56.4	0.00467294	56.4	0.01103746	56.4	0.00693524	56.4	0.01146395	56.4	0.01133911	56.4	0.01784226	56.4	0.01585365	56.4	0.02312152	56.4	0.01256804	56.4	0.02093	56.4	0.0136991	56.4	0.00174941
56.6	0.02174971	56.6	0.0292694	56.6	0.00453743	56.6	0.02350321	56.6	0.01195186	56.6	0.00907119	56.6	0.00846087	56.6	0.00984885	56.6	0.01540355	56.6	0.01781373	56.6	0.0144719	56.6	0.02218076	56.6	0.01360892	56.6	0.01845437	56.6	0.01055024	56.6	0.00657744
56.8	0.02210108	56.8	0.02089261	56.8	0.00866491	56.8	0.02227038	56.8	0.01197672	56.8	0.00908946	56.8	0.00166479	56.8	0.01429622	56.8	0.01089726	56.8	0.01666013	56.8	0.01582971	56.8	0.01900868	56.8	0.01208014	56.8	0.01424901	56.8	0.01250805	56.8	0.00665495
57	0.01952596	57	0.01866252	57	0.00952928	57	0.01957451	57	0.01216637	57	0.01231808	57	0.00602456	57	0.01379934	57	0.0149461	57	0.01584315	57	0.01883166	57	0.01988648	57	0.00518292	57	0.0166153	57	0.00986784	57	0.00244087
57.2	0.02554859	57.2	0.02210153	57.2	0.00945178	57.2	0.01952089	57.2	0.01453818	57.2	0.01206262	57.2	0.00486951	57.2	0.01449695	57.2	0.01582162	57.2	0.01671915	57.2	0.01907533	57.2	0.02742941	57.2	0.01360773	57.2	0.01764341	57.2	0.01529015	57.2	0.00647226
57.4	0.01989179	57.4	0.02014312	57.4	0.00763928	57.4	0.0254525	57.4	0.00888049	57.4	0.00962609	57.4	0.0085693	57.4	0.01534093	57.4	0.01489764	57.4	0.01622339	57.4	0.01649803	57.4	0.02526622	57.4	0.01235804	57.4	0.01773898	57.4	0.01134046	57.4	0.00547592
57.6	0.0243337	57.6	0.0227768	57.6	0.00871788	57.6	0.01820547	57.6	0.0091864	57.6	0.01147272	57.6	0.00519707	57.6	0.01349272	57.6	0.01487272	57.6	0.02018518	57.6	0.01534749	57.6	0.02196545	57.6	0.01166514	57.6	0.01553726	57.6	0.01298141	57.6	0.00177401
57.8	0.02093969	57.8	0.01959269	57.8	0.00912533	57.8	0.02032487	57.8	0.01060166	57.8	0.01353957	57.8	0.00809906	57.8	0.00952194	57.8	0.01208341	57.8	0.02041322	57.8	0.02290451	57.8	0.02200614	57.8	0.00411012	57.8	0.01727729	57.8	0.01214654	57.8	0.00157936
58	0.02311612	58	0.03022968	58	0.008744	58	0.02542755	58	0.01538709	58	0.01002938	58	0.00557102	58	0.0121003	58	0.01349692	58	0.01334984	58	0.01466167	58	0.0257414	58	0.01123744	58	0.01754099	58	0.01660335	58	0.00524252
58.2	0.01935512	58.2	0.02027362	58.2	0.00976034	58.2	0.02256056	58.2	0.01132001	58.2	0.01040976	58.2	0.01073696	58.2	0.01211832	58.2	0.01519104	58.2	0.02273864	58.2	0.0203679	58.2	0.02284807	58.2	0.0113229	58.2	0.01561053	58.2	0.01357449	58.2	0.00137263
58.4	0.02350593	58.4	0.02256532	58.4	0.0086775	58.4	0.01785916	58.4	0.01117751	58.4	0.0064894	58.4	0.00405108	58.4	0.01285105	58.4	0.01486582	58.4	0.01603056	58.4	0.01976254	58.4	0.02604456	58.4	0.01135274	58.4	0.01645153	58.4	0.0144734	58.4	0.00016307
58.6	0.02496695	58.6	0.02228845	58.6	0.00795777	58.6	0.01941001	58.6	0.010284	58.6	0.01366394	58.6	0.00566842	58.6	0.01459987	58.6	0.01452502	58.6	0.01750551	58.6	0.01818975	58.6	0.02102331	58.6	0.00972224	58.6	0.01733579	58.6	0.01361959	58.6	0.00756881
58.8	0.02335308	58.8	0.02627044	58.8	0.01051297	58.8	0.02382077	58.8	0.01226937	58.8	0.01032517	58.8	0.0073822	58.8	0.0109062	58.8	0.01567654	58.8	0.0213963	58.8	0.01998458	58.8	0.02101236	58.8	0.00847944	58.8	0.01829127	58.8	0.01783628	58.8	0.01039914
59	0.02153472	59	0.02112612	59	0.0084091	59	0.02338311	59	0.00924486	59	0.01057562	59	0.008293	59	0.01591262	59	0.01742312	59	0.01704326	59	0.0158721	59	0.02337928	59	0.01259924	59	0.02145576	59	0.01200822	59	0.00516557
59.2	0.02328147	59.2	0.02490804	59.2	0.01060117	59.2	0.02094646	59.2	0.01038666	59.2	0.01365389	59.2	0.00791023	59.2	0.01266267	59.2	0.01478428	59.2	0.01052993	59.2	0.01868189	59.2	0.02214576	59.2	0.00882856	59.2	0.01377463	59.2	0.01241576	59.2	-0.00113703
59.4	0.02367472	59.4	0.02737686	59.4	0.00894902	59.4	0.01968297	59.4	0.0051428	59.4	0.00968993	59.4	0.00410271	59.4	0.01135158	59.4	0.01644771	59.4	0.01539633	59.4	0.02049917	59.4	0.02359984	59.4	0.01307056	59.4	0.01677251	59.4	0.01845524	59.4	0.00781535
59.6	0.0238241	59.6	0.02492598	59.6	0.00957699	59.6	0.02404284	59.6	0.01109589	59.6	0.01216373	59.6	0.00627532	59.6	0.00997719	59.6	0.01434711	59.6	0.01791014	59.6	0.01880647	59.6	0.01963581	59.6	0.01221942	59.6	0.01862688	59.6	0.01293609	59.6	0.00295124
59.8	0.02512684	59.8	0.02596358	59.8	0.00874673	59.8	0.02386785	59.8	0.01029091	59.8	0.01217673	59.8	0.00393892	59.8	0.01518946	59.8	0.01564081	59.8	0.0171945	59.8	0.01524551	59.8	0.02375979	59.8	0.01222197	59.8	0.01685937	59.8	0.01473202	59.8	0.00459873
60	-4.309813	60	-4.302652	60	-4.475038	60	-4.393991	60	-4.314	60	-4.199103	60	-4.131027	60	-3.924186	60	-3.864951	60	-3.894245	60	-3.914064	60	-3.79873	60	-3.948409	60	-3.952983	60	-3.824105	60	-3.685731
60.2	-4.53331	60.2	-4.591563	60.2	-4.705569	60.2	-4.612624	60.2	-4.555604	60.2	-4.497414	60.2	-4.439515	60.2	-4.270644	60.2	-4.19006	60.2	-4.254935	60.2	-4.265745	60.2	-4.166214	60.2	-4.267643	60.2	-4.313283	60.2	-4.189605	60.2	-4.053814
60.4	-4.685998	60.4	-4.755141	60.4	-4.844151	60.4	-4.759537	60.4	-4.706463	60.4	-4.680115	60.4	-4.622397	60.4	-4.461438	60.4	-4.376963	60.4	-4.455414	60.4	-4.463492	60.4	-4.369566	60.4	-4.463836	60.4	-4.512816	60.4	-4.382805	60.4	-4.248491
60.6	-4.798028	60.6	-4.884637	60.6	-4.96103	60.6	-4.878916	60.6	-4.826782	60.6	-4.808066	60.6	-4.766131	60.6	-4.597258	60.6	-4.505651	60.6	-4.593224	60.6	-4.59956	60.6	-4.495522	60.6	-4.580692	60.6	-4.647397	60.6	-4.511165	60.6	-4.387075
60.8	-4.885771	60.8	-4.989068	60.8	-5.064286	60.8	-4.960189	60.8	-4.92039	60.8	-4.91279	60.8	-4.871681	60.8	-4.698322	60.8	-4.601132	60.8	-4.690646	60.8	-4.699022	60.8	-4.601474	60.8	-4.68708	60.8	-4.756989	60.8	-4.621079	60.8	-4.486609
61	-4.961083	61	-5.068054	61	-5.133393	61	-5.033481	61	-4.997628	61	-4.996904	61	-4.949522	61	-4.782955	61	-4.682471	61	-4.773254	61	-4.781278	61	-4.684714	61	-4.767711	61	-4.843135	61	-4.705647	61	-4.565744
61.2	-5.023844	61.2	-5.133167	61.2	-5.199998	61.2	-5.100258	61.2	-5.066308	61.2	-5.060837	61.2	-5.025844	61.2	-4.860793	61.2	-4.754768	61.2	-4.845422	61.2	-4.857015	61.2	-4.754389	61.2	-4.843141	61.2	-4.913344	61.2	-4.779585	61.2	-4.6385
61.4	-5.082344	61.4	-5.198539	61.4	-5.255832	61.4	-5.159917	61.4	-5.117574	61.4	-5.120563	61.4	-5.088711	61.4	-4.917553	61.4	-4.807575	61.4	-4.905128	61.4	-4.914529	61.4	-4.810851	61.4	-4.895546	61.4	-4.984384	61.4	-4.842574	61.4	-4.695398
61.6	-5.132945	61.6	-5.246632	61.6	-5.305651	61.6	-5.204778	61.6	-5.167798	61.6	-5.174528	61.6	-5.1425	61.6	-4.969697	61.6	-4.861106	61.6	-4.95909	61.6	-4.969303	61.6	-4.863821	61.6	-4.951055	61.6	-5.031681	61.6	-4.886458	61.6	-4.74291
61.8	-5.176973	61.8	-5.295073	61.8	-5.349671	61.8	-5.250238	61.8	-5.212456	61.8	-5.216301	61.8	-5.184374	61.8	-5.021724	61.8	-4.904329	61.8	-4.99938	61.8	-5.012289	61.8	-4.90892	61.8	-4.992776	61.8	-5.084152	61.8	-4.936045	61.8	-4.795831
62	-5.218299	62	-5.338354	62	-5.386831	62	-5.289907	62	-5.247927	62	-5.260087	62	-5.233759	62	-5.058229	62	-4.944677	62	-5.049221	62	-5.055571	62	-4.94827	62	-5.028935	62	-5.123703	62	-4.97381	62	-4.831162
62.2	-5.25322	62.2	-5.375895	62.2	-5.422971	62.2	-5.327404	62.2	-5.281845	62.2	-5.302151	62.2	-5.268054	62.2	-5.10123	62.2	-4.977445	62.2	-5.087461	62.2	-5.092913	62.2	-4.986274	62.2	-5.068013	62.2	-5.164902	62.2	-5.017878	62.2	-4.867064
62.4	-5.292643	62.4	-5.407728	62.4	-5.46014	62.4	-5.358205	62.4	-5.321058	62.4	-5.333499	62.4	-5.307458	62.4	-5.136325	62.4	-5.0122	62.4	-5.120082	62.4	-5.125035	62.4	-5.023711	62.4	-5.096595	62.4	-5.195749	62.4	-5.044325	62.4	-4.906188
62.6	-5.313222	62.6	-5.442587	62.6	-5.49014	62.6	-5.390897	62.6	-5.351063	62.6	-5.365571	62.6	-5.336458	62.6	-5.16459	62.6	-5.042908	62.6	-5.149931	62.6	-5.156275	62.6	-5.049788	62.6	-5.12593	62.6	-5.228279	62.6	-5.079524	62.6	-4.928673
62.8	-5.345302	62.8	-5.473759	62.8	-5.515725	62.8	-5.413347	62.8	-5.371762	62.8	-5.39738	62.8	-5.370594	62.8	-5.192286	62.8	-5.073254	62.8	-5.174411	62.8	-5.187407	62.8	-5.079323	62.8	-5.16006	62.8	-5.256112	62.8	-5.103719	62.8	-4.957874
63	-5.370149	63	-5.497041	63	-5.544855	63	-5.440482	63	-5.402245	63	-5.422963	63	-5.390288	63	-5.217815	63	-5.100453	63	-5.202917	63	-5.204935	63	-5.101681	63	-5.182073	63	-5.283735	63	-5.131973	63	-4.986191
63.2	-5.397235	63.2	-5.52452	63.2	-5.567319	63.2	-5.463534	63.2	-5.432258	63.2	-5.444647	63.2	-5.420129	63.2	-5.24374	63.2	-5.117975	63.2	-5.230091	63.2	-5.234509	63.2	-5.131522	63.2	-5.207681	63.2	-5.30611	63.2	-5.16061	63.2	-5.008225
63.4	-5.421915	63.4	-5.547482	63.4	-5.594789	63.4	-5.490095	63.4	-5.455741	63.4	-5.47612	63.4	-5.439709	63.4	-5.273465	63.4	-5.140726	63.4	-5.249131	63.4	-5.251799	63.4	-5.148464	63.4	-5.228621	63.4	-5.330415	63.4	-5.177141	63.4	-5.028453
63.6	-5.438516	63.6	-5.569584	63.6	-5.610353	63.6	-5.508181	63.6	-5.473612	63.6	-5.490864	63.6	-5.461887	63.6	-5.293446	63.6	-5.161704	63.6	-5.273696	63.6	-5.275507	63.6	-5.170374	63.6	-5.249786	63.6	-5.351166	63.6	-5.199811	63.6	-5.052742
63.8	-5.455315	63.8	-5.590288	63.8	-5.630572	63.8	-5.531076	63.8	-5.492537	63.8	-5.512341	63.8	-5.487976	63.8	-5.308827	63.8	-5.182843	63.8	-5.292035	63.8	-5.299233	63.8	-5.192225	63.8	-5.27169	63.8	-5.370619	63.8	-5.221923	63.8	-5.06798
64	-5.481631	64	-5.605368	64	-5.648876	64	-5.548017	64	-5.507957	64	-5.535236	64	-5.50782	64	-5.333782	64	-5.202906	64	-5.310745	64	-5.311914	64	-5.209892	64	-5.287441	64	-5.393778	64	-5.243707	64	-5.087493
64.2	-5.496146	64.2	-5.631432	64.2	-5.672945	64.2	-5.570629	64.2	-5.52961	64.2	-5.555841	64.2	-5.526856	64.2	-5.349197	64.2	-5.220898	64.2	-5.328982	64.2	-5.331497	64.2	-5.231134	64.2	-5.302835	64.2	-5.405101	64.2	-5.257433	64.2	-5.10379
64.4	-5.513647	64.4	-5.640201	64.4	-5.684653	64.4	-5.584312	64.4	-5.545987	64.4	-5.570077	64.4	-5.538707	64.4	-5.365829	64.4	-5.23204	64.4	-5.344075	64.4	-5.345981	64.4	-5.244959	64.4	-5.324907	64.4	-5.430641	64.4	-5.274455	64.4	-5.123878
64.6	-5.527132	64.6	-5.65556	64.6	-5.701416	64.6	-5.597507	64.6	-5.557594	64.6	-5.585911	64.6	-5.554352	64.6	-5.382308	64.6	-5.248307	64.6	-5.357773	64.6	-5.35875	64.6	-5.25474	64.6	-5.334809	64.6	-5.435301	64.6	-5.289278	64.6	-5.13465
64.8	-5.534383	64.8	-5.666114	64.8	-5.70587	64.8	-5.60625	64.8	-5.569295	64.8	-5.593956	64.8	-5.566005	64.8	-5.388037	64.8	-5.252989	64.8	-5.368075	64.8	-5.370228	64.8	-5.266433	64.8	-5.345935	64.8	-5.448179	64.8	-5.295223	64.8	-5.143234
65	-1.026142	65	-1.061938	65	-1.051532	65	-1.021735	65	-1.038775	65	-1.029319	65	-1.028977	65	-0.9916272	65	-0.942197	65	-0.9855078	65	-0.9647008	65	-0.9284624	65	-0.9545059	65	-0.9717162	65	-0.9450877	65	-0.9247193
65.2	-0.9745013	65.2	-1.012061	65.2	-1.009054	65.2	-0.9779353	65.2	-0.9926352	65.2	-0.9842361	65.2	-0.9783891	65.2	-0.9486097	65.2	-0.9033216	65.2	-0.933179	65.2	-0.9208518	65.2	-0.8927271	65.2	-0.91347	65.2	-0.9334465	65.2	-0.8982313	65.2	-0.8855021
65.4	-0.9359607	65.4	-0.9724649	65.4	-0.9652522	65.4	-0.9339716	65.4	-0.9522421	65.4	-0.9475943	65.4	-0.9405928	65.4	-0.9080473	65.4	-0.8612762	65.4	-0.8934914	65.4	-0.8808292	65.4	-0.8555838	65.4	-0.8734823	65.4	-0.8930082	65.4	-0.8566631	65.4	-0.8481802
65.6	-0.9020163	65.6	-0.9401522	65.6	-0.9327731	65.6	-0.8979658	65.6	-0.9208648	65.6	-0.9144051	65.6	-0.9105251	65.6	-0.8750412	65.6	-0.828103	65.6	-0.8588932	65.6	-0.8531114	65.6	-0.8208601	65.6	-0.84158	65.6	-0.8555303	65.6	-0.8266826	65.6	-0.8094163
65.8	-0.8728393	65.8	-0.9149337	65.8	-0.8991247	65.8	-0.8691915	65.8	-0.8928219	65.8	-0.8802134	65.8	-0.8798119	65.8	-0.848625	65.8	-0.7984592	65.8	-0.8345717	65.8	-0.8187281	65.8	-0.7941034	65.8	-0.8091357	65.8	-0.8242986	65.8	-0.7957696	65.8	-0.7812112
66	-0.8501382	66	-0.8886383	66	-0.8811722	66	-0.8478212	66	-0.8641918	66	-0.8608108	66	-0.8535358	66	-0.8277541	66	-0.7749484	66	-0.8109919	66	-0.7933856	66	-0.7730885	66	-0.7928272	66	-0.8040821	66	-0.7668272	66	-0.7602627
66.2	-0.8364442	66.2	-0.86502	66.2	-0.8605103	66.2	-0.829339	66.2	-0.8464878	66.2	-0.843764	66.2	-0.8318409	66.2	-0.8030028	66.2	-0.7580782	66.2	-0.7891625	66.2	-0.7754722	66.2	-0.7530741	66.2	-0.7684349	66.2	-0.7849047	66.2	-0.751392	66.2	-0.7390181
66.4	-0.8157625	66.4	-0.8458512	66.4	-0.8413465	66.4	-0.8119348	66.4	-0.8313347	66.4	-0.8264018	66.4	-0.8153653	66.4	-0.789113	66.4	-0.7407112	66.4	-0.7739813	66.4	-0.7595766	66.4	-0.7346031	66.4	-0.7598478	66.4	-0.7670768	66.4	-0.7381397	66.4	-0.7250711
66.6	-0.7976374	66.6	-0.8331024	66.6	-0.8292657	66.6	-0.7895414	66.6	-0.8150098	66.6	-0.8083434	66.6	-0.8005348	66.6	-0.7721577	66.6	-0.7249746	66.6	-0.7592691	66.6	-0.7373741	66.6	-0.7215961	66.6	-0.737672	66.6	-0.7548362	66.6	-0.7159407	66.6	-0.7056599
66.8	-0.790349	66.8	-0.8243811	66.8	-0.8118452	66.8	-0.7820732	66.8	-0.8027232	66.8	-0.7946892	66.8	-0.787567	66.8	-0.7650859	66.8	-0.7132052	66.8	-0.7479107	66.8	-0.728555	66.8	-0.7048107	66.8	-0.7272453	66.8	-0.7384865	66.8	-0.7077059	66.8	-0.6934798
67	-0.7690619	67	-0.8082432	67	-0.7993941	67	-0.7643602	67	-0.7883698	67	-0.7833124	67	-0.7771515	67	-0.7486829	67	-0.6995588	67	-0.7318649	67	-0.7175514	67	-0.6900043	67	-0.7157841	67	-0.7204762	67	-0.6903992	67	-0.6815473
67.2	-0.7624441	67.2	-0.8014832	67.2	-0.7890209	67.2	-0.7545071	67.2	-0.7787252	67.2	-0.7713229	67.2	-0.7615293	67.2	-0.7391708	67.2	-0.693044	67.2	-0.7246538	67.2	-0.7063999	67.2	-0.6835966	67.2	-0.7017317	67.2	-0.7084741	67.2	-0.6866167	67.2	-0.6757906
67.4	-0.756394	67.4	-0.7881113	67.4	-0.7818267	67.4	-0.746832	67.4	-0.7726521	67.4	-0.75971	67.4	-0.7542554	67.4	-0.7265377	67.4	-0.6791147	67.4	-0.7165712	67.4	-0.6982138	67.4	-0.6759946	67.4	-0.6971139	67.4	-0.7026409	67.4	-0.6783694	67.4	-0.6665328
67.6	-0.7474492	67.6	-0.7771526	67.6	-0.7714267	67.6	-0.7382496	67.6	-0.7557756	67.6	-0.7500326	67.6	-0.7463891	67.6	-0.7236697	67.6	-0.6698377	67.6	-0.7024974	67.6	-0.6898875	67.6	-0.6630117	67.6	-0.6867306	67.6	-0.6946844	67.6	-0.6635594	67.6	-0.6581751
67.8	-0.736895	67.8	-0.7720881	67.8	-0.7618721	67.8	-0.7332795	67.8	-0.749347	67.8	-0.7449496	67.8	-0.7346466	67.8	-0.7164273	67.8	-0.6595281	67.8	-0.6987104	67.8	-0.6831823	67.8	-0.6527099	67.8	-0.6817162	67.8	-0.6872872	67.8	-0.6530867	67.8	-0.6479627
68	-0.7275007	68	-0.7634042	68	-0.7518986	68	-0.7217966	68	-0.7444391	68	-0.7353954	68	-0.7285153	68	-0.7043676	68	-0.6570398	68	-0.6922536	68	-0.6736404	68	-0.6449566	68	-0.6726122	68	-0.6835259	68	-0.6459728	68	-0.6408439
68.21	-0.7243697	68.21	-0.7549585	68.21	-0.7415237	68.21	-0.7154023	68.21	-0.7339738	68.21	-0.7281958	68.21	-0.7223653	68.21	-0.6968759	68.22	-0.6460591	68.22	-0.6823776	68.22	-0.6607282	68.22	-0.6393049	68.22	-0.6603985	68.22	-0.6699111	68.22	-0.6393958	68.22	-0.6295388
68.4	-0.7161219	68.4	-0.750447	68.4	-0.740581	68.4	-0.7064899	68.4	-0.7329832	68.4	-0.7216994	68.4	-0.7157248	68.4	-0.6886575	68.4	-0.636979	68.4	-0.6722335	68.4	-0.6575139	68.4	-0.6277569	68.4	-0.6570006	68.4	-0.664723	68.4	-0.6362275	68.4	-0.6204743
68.6	-0.7067265	68.6	-0.7486923	68.6	-0.7305734	68.6	-0.7000528	68.6	-0.7227135	68.6	-0.7143925	68.6	-0.7058796	68.6	-0.6846937	68.6	-0.6317295	68.6	-0.670033	68.6	-0.6497566	68.6	-0.6293328	68.6	-0.6456899	68.6	-0.653379	68.6	-0.6238334	68.6	-0.6179714
68.8	-0.7008348	68.8	-0.7425468	68.8	-0.7258087	68.8	-0.6958802	68.8	-0.7142946	68.8	-0.7085109	68.8	-0.7073746	68.8	-0.6812081	68.8	-0.6222299	68.8	-0.6569282	68.8	-0.6419723	68.8	-0.6211848	68.8	-0.6450251	68.8	-0.6502578	68.8	-0.6245382	68.8	-0.6164579
69	-0.6897893	69	-0.7281306	69	-0.71934	69	-0.6889464	69	-0.7127303	69	-0.7013156	69	-0.6990326	69	-0.6713517	69	-0.620407	69	-0.6524411	69	-0.6340928	69	-0.6090948	69	-0.639609	69	-0.6502056	69	-0.6129636	69	-0.6082523
69.2	-0.68966	69.2	-0.7232374	69.2	-0.7114723	69.2	-0.6847376	69.2	-0.704734	69.2	-0.6946053	69.2	-0.6878242	69.2	-0.6667131	69.2	-0.6167383	69.2	-0.6467817	69.2	-0.6330165	69.2	-0.6087726	69.2	-0.6303107	69.2	-0.6383293	69.2	-0.6101558	69.2	-0.5987459
69.4	-0.6868329	69.4	-0.7225572	69.4	-0.7096184	69.4	-0.6758043	69.4	-0.6971392	69.4	-0.6917933	69.4	-0.6821437	69.4	-0.6597378	69.4	-0.6088083	69.4	-0.6471253	69.4	-0.6261191	69.4	-0.5959941	69.4	-0.6224509	69.4	-0.636911	69.4	-0.6033143	69.4	-0.5978848
69.6	-0.6796589	69.6	-0.7132345	69.6	-0.7014287	69.6	-0.6733472	69.6	-0.691166	69.6	-0.6862142	69.6	-0.6828322	69.6	-0.6590977	69.6	-0.6074517	69.6	-0.6424679	69.6	-0.6213257	69.6	-0.5939436	69.6	-0.6178175	69.6	-0.6294475	69.6	-0.5967433	69.6	-0.5947936
69.8	-0.6760122	69.8	-0.7117592	69.8	-0.6995474	69.8	-0.668754	69.8	-0.6944326	69.8	-0.6809747	69.8	-0.6773037	69.8	-0.6568075	69.8	-0.6061494	69.8	-0.6412847	69.8	-0.6201265	69.8	-0.5961379	69.8	-0.6198616	69.8	-0.6264781	69.8	-0.5973675	69.8	-0.5922148
70	-4.780445	70	-4.808255	70	-4.86674	70	-4.728028	70	-4.822278	70	-4.75289	70	-4.70906	70	-4.518677	70	-4.54928	70	-4.623589	70	-4.613049	70	-4.502484	70	-4.591837	70	-4.681136	70	-4.496842	70	-4.38031
70.2	-5.026797	70.2	-5.12057	70.2	-5.149976	70.2	-5.023643	70.2	-5.063001	70.2	-5.039355	70.2	-5.002604	70.2	-4.825693	70.2	-4.784457	70.2	-4.886768	70.2	-4.876584	70.2	-4.771784	70.2	-4.849101	70.2	-4.936008	70.2	-4.775631	70.2	-4.647069
70.4	-5.144863	70.4	-5.254765	70.4	-5.279517	70.4	-5.164237	70.4	-5.175213	70.4	-5.175512	70.4	-5.146652	70.4	-4.969537	70.4	-4.885045	70.4	-5.002495	70.4	-4.989073	70.4	-4.881177	70.4	-4.957911	70.4	-5.049911	70.4	-4.890954	70.4	-4.762943
70.6	-5.209762	70.6	-5.335326	70.6	-5.360429	70.6	-5.244424	70.6	-5.243696	70.6	-5.244143	70.6	-5.227183	70.6	-5.047802	70.6	-4.950666	70.6	-5.071019	70.6	-5.061863	70.6	-4.949428	70.6	-5.026675	70.6	-5.126565	70.6	-4.971158	70.6	-4.838307
70.8	-5.264977	70.8	-5.394838	70.8	-5.418231	70.8	-5.299443	70.8	-5.30013	70.8	-5.300011	70.8	-5.281209	70.8	-5.107379	70.8	-5.004512	70.8	-5.120761	70.8	-5.1101	70.8	-5.007967	70.8	-5.080968	70.8	-5.174647	70.8	-5.018486	70.8	-4.885897
71	-5.304536	71	-5.440952	71	-5.457665	71	-5.343776	71	-5.339891	71	-5.349746	71	-5.327502	71	-5.150154	71	-5.041757	71	-5.162318	71	-5.150206	71	-5.049583	71	-5.122386	71	-5.212252	71	-5.064816	71	-4.928015
71.2	-5.340344	71.2	-5.479789	71.2	-5.496273	71.2	-5.382103	71.2	-5.374585	71.2	-5.380841	71.2	-5.361252	71.2	-5.18892	71.2	-5.079663	71.2	-5.199773	71.2	-5.188074	71.2	-5.07939	71.2	-5.160614	71.2	-5.252009	71.2	-5.099152	71.2	-4.966097
71.4	-5.367545	71.4	-5.507263	71.4	-5.526989	71.4	-5.411223	71.4	-5.406028	71.4	-5.416209	71.4	-5.393442	71.4	-5.220806	71.4	-5.103862	71.4	-5.229218	71.4	-5.216129	71.4	-5.113815	71.4	-5.184179	71.4	-5.284625	71.4	-5.124196	71.4	-4.99244
71.6	-5.398393	71.6	-5.533471	71.6	-5.552436	71.6	-5.435908	71.6	-5.425804	71.6	-5.440068	71.6	-5.417761	71.6	-5.244508	71.6	-5.127955	71.6	-5.253288	71.6	-5.240061	71.6	-5.135166	71.6	-5.21273	71.6	-5.312148	71.6	-5.149821	71.6	-5.015401
71.8	-5.422543	71.8	-5.560163	71.8	-5.580903	71.8	-5.461609	71.8	-5.457079	71.8	-5.467661	71.8	-5.440347	71.8	-5.268929	71.8	-5.151828	71.8	-5.271675	71.8	-5.265222	71.8	-5.155397	71.8	-5.230687	71.8	-5.331694	71.8	-5.172438	71.8	-5.035007
72	-5.443341	72	-5.581573	72	-5.60222	72	-5.487827	72	-5.471611	72	-5.486885	72	-5.462376	72	-5.289882	72	-5.179027	72	-5.296288	72	-5.279114	72	-5.177398	72	-5.256296	72	-5.349855	72	-5.195504	72	-5.0605
72.2	-5.461592	72.2	-5.596429	72.2	-5.617694	72.2	-5.506204	72.2	-5.488342	72.2	-5.503258	72.2	-5.486324	72.2	-5.308719	72.2	-5.189168	72.2	-5.319516	72.2	-5.303262	72.2	-5.199888	72.2	-5.269098	72.2	-5.364391	72.2	-5.215815	72.2	-5.074021
72.4	-5.475754	72.4	-5.616471	72.4	-5.634257	72.4	-5.519856	72.4	-5.509186	72.4	-5.523354	72.4	-5.503769	72.4	-5.330712	72.4	-5.204925	72.4	-5.329319	72.4	-5.314871	72.4	-5.211277	72.4	-5.28809	72.4	-5.385448	72.4	-5.22843	72.4	-5.089017
72.61	-5.493511	72.61	-5.637471	72.61	-5.653804	72.61	-5.541473	72.61	-5.524787	72.61	-5.541394	72.61	-5.52165	72.61	-5.343287	72.6	-5.216265	72.6	-5.348115	72.6	-5.32794	72.6	-5.230394	72.6	-5.302894	72.6	-5.406394	72.6	-5.24196	72.6	-5.105405
72.8	-5.508124	72.8	-5.656048	72.8	-5.665947	72.8	-5.556319	72.8	-5.536696	72.8	-5.549934	72.8	-5.530015	72.8	-5.357503	72.8	-5.23491	72.8	-5.362548	72.8	-5.345726	72.8	-5.240364	72.8	-5.316106	72.8	-5.417842	72.8	-5.263361	72.8	-5.118337
73	-5.523197	73	-5.66935	73	-5.684789	73	-5.560722	73	-5.550804	73	-5.567572	73	-5.548057	73	-5.368986	73	-5.253521	73	-5.375389	73	-5.364141	73	-5.256175	73	-5.333036	73	-5.431839	73	-5.274366	73	-5.132352
73.2	-5.532567	73.2	-5.682287	73.2	-5.696623	73.2	-5.58385	73.2	-5.566057	73.2	-5.580801	73.2	-5.560683	73.2	-5.388116	73.2	-5.260635	73.2	-5.385898	73.2	-5.36933	73.2	-5.269662	73.2	-5.340162	73.2	-5.441555	73.2	-5.27938	73.2	-5.138467
73.4	-5.549085	73.4	-5.692417	73.4	-5.705965	73.4	-5.592024	73.4	-5.577286	73.4	-5.592135	73.4	-5.57006	73.4	-5.393394	73.4	-5.271051	73.4	-5.395966	73.4	-5.385099	73.4	-5.281175	73.4	-5.353959	73.4	-5.449105	73.4	-5.293289	73.4	-5.157413
73.6	-5.55851	73.6	-5.702146	73.6	-5.717397	73.6	-5.606693	73.6	-5.587666	73.6	-5.601353	73.6	-5.581533	73.6	-5.40206	73.6	-5.283007	73.6	-5.409854	73.6	-5.390059	73.6	-5.291433	73.6	-5.362151	73.6	-5.467381	73.6	-5.307864	73.6	-5.168513
73.8	-5.574348	73.8	-5.710299	73.8	-5.732603	73.8	-5.614208	73.8	-5.604518	73.8	-5.613883	73.8	-5.595036	73.8	-5.419856	73.8	-5.292535	73.8	-5.415224	73.8	-5.404599	73.8	-5.295689	73.8	-5.371689	73.8	-5.478858	73.8	-5.320987	73.8	-5.177285
74	-5.582787	74	-5.728359	74	-5.739821	74	-5.623409	74	-5.608959	74	-5.625054	74	-5.605589	74	-5.425734	74	-5.297694	74	-5.429342	74	-5.413862	74	-5.31552	74	-5.384845	74	-5.488429	74	-5.330425	74	-5.181277
74.2	-5.590104	74.2	-5.735789	74.2	-5.750184	74.2	-5.635811	74.2	-5.616323	74.2	-5.635674	74.2	-5.612301	74.2	-5.439796	74.2	-5.30981	74.2	-5.433201	74.2	-5.417078	74.2	-5.321911	74.2	-5.393943	74.2	-5.49453	74.2	-5.334941	74.2	-5.197565
74.4	-5.599504	74.4	-5.744401	74.4	-5.757852	74.4	-5.643348	74.4	-5.627184	74.4	-5.646019	74.4	-5.62342	74.4	-5.446723	74.4	-5.318188	74.4	-5.44294	74.4	-5.433137	74.4	-5.327371	74.4	-5.400565	74.4	-5.50822	74.4	-5.346894	74.4	-5.19831
74.6	-5.60923	74.6	-5.749694	74.6	-5.767991	74.6	-5.647237	74.6	-5.632954	74.6	-5.65138	74.6	-5.63309	74.6	-5.452636	74.6	-5.325274	74.6	-5.457525	74.6	-5.440517	74.6	-5.335972	74.6	-5.410029	74.6	-5.50736	74.6	-5.350873	74.6	-5.210377
74.8	-5.613428	74.8	-5.753898	74.8	-5.773445	74.8	-5.655527	74.8	-5.637971	74.8	-5.657697	74.8	-5.639105	74.8	-5.460848	74.8	-5.329058	74.8	-5.456225	74.8	-5.442863	74.8	-5.338063	74.8	-5.413964	74.8	-5.51668	74.8	-5.359727	74.8	-5.212105
75	-0.9970291	75	-1.050416	75	-1.008531	75	-0.9633529	75	-1.00058	75	-0.9719847	75	-0.9719973	75	-0.9604155	75	-0.9103969	75	-0.9704519	75	-0.9435665	75	-0.8969286	75	-0.9248171	75	-0.9363201	75	-0.8997498	75	-0.8911599
75.2	-0.9504616	75.2	-1.002509	75.2	-0.9603071	75.2	-0.9206771	75.2	-0.9504659	75.2	-0.9326262	75.2	-0.9298136	75.2	-0.9154313	75.2	-0.8692053	75.2	-0.9283608	75.2	-0.8989915	75.2	-0.8603323	75.2	-0.8877035	75.2	-0.8952754	75.2	-0.8581558	75.2	-0.8497089
75.4	-0.9211215	75.4	-0.9716766	75.4	-0.9254217	75.4	-0.8851805	75.4	-0.9187756	75.4	-0.9000549	75.4	-0.8984661	75.4	-0.8786302	75.4	-0.8328081	75.4	-0.8815058	75.4	-0.856142	75.4	-0.8230426	75.4	-0.853721	75.4	-0.8549749	75.4	-0.8166723	75.4	-0.813372
75.6	-0.8848065	75.6	-0.9333538	75.6	-0.8985639	75.6	-0.8535423	75.6	-0.8886282	75.6	-0.8706301	75.6	-0.8652523	75.6	-0.8450832	75.6	-0.8090575	75.6	-0.8551621	75.6	-0.8266076	75.6	-0.7907333	75.6	-0.8253387	75.6	-0.8232635	75.6	-0.7834181	75.6	-0.7819949
75.8	-0.854039	75.8	-0.9112768	75.8	-0.8712876	75.8	-0.8269817	75.8	-0.8599433	75.8	-0.8404058	75.8	-0.840992	75.8	-0.8162158	75.8	-0.7798147	75.8	-0.8297885	75.8	-0.8019394	75.8	-0.7671727	75.8	-0.7916563	75.8	-0.7976388	75.8	-0.7565238	75.8	-0.7542674
76	-0.8376616	76	-0.8838521	76	-0.8509213	76	-0.8068295	76	-0.8431544	76	-0.8181511	76	-0.8145096	76	-0.7958089	76	-0.7564	76	-0.8083044	76	-0.7773725	76	-0.7383087	76	-0.7693824	76	-0.7670245	76	-0.7327116	76	-0.7306747
76.2	-0.8171667	76.2	-0.8657798	76.2	-0.8292809	76.2	-0.7895898	76.2	-0.8239714	76.2	-0.8028259	76.2	-0.7978417	76.2	-0.7780121	76.21	-0.7326488	76.21	-0.7879118	76.21	-0.7568768	76.21	-0.721543	76.21	-0.7543854	76.21	-0.7556807	76.21	-0.7184049	76.21	-0.7119708
76.4	-0.800104	76.4	-0.8527837	76.4	-0.8102553	76.4	-0.7722105	76.4	-0.8057533	76.4	-0.7898852	76.4	-0.7857711	76.4	-0.7601749	76.4	-0.723317	76.4	-0.7693058	76.4	-0.7418452	76.4	-0.7063389	76.4	-0.7388124	76.4	-0.7404162	76.4	-0.7025827	76.4	-0.6968967
76.6	-0.7924885	76.6	-0.836262	76.6	-0.8032428	76.6	-0.7631349	76.6	-0.7937691	76.6	-0.7702299	76.6	-0.7686194	76.6	-0.7469025	76.6	-0.7045379	76.6	-0.7563033	76.6	-0.7237589	76.6	-0.6940263	76.6	-0.7235764	76.6	-0.7192994	76.6	-0.6887624	76.6	-0.683777
76.8	-0.7748852	76.8	-0.8207014	76.8	-0.7861713	76.8	-0.7466885	76.8	-0.7780969	76.8	-0.757663	76.8	-0.7561869	76.8	-0.7390149	76.8	-0.6955351	76.8	-0.7431773	76.8	-0.7165201	76.8	-0.6798958	76.8	-0.7121671	76.8	-0.7060875	76.8	-0.6685168	76.8	-0.6725829
77	-0.759692	77	-0.8085623	77	-0.7730245	77	-0.7359868	77	-0.7684392	77	-0.746486	77	-0.7441129	77	-0.7249602	77	-0.6771676	77	-0.7308747	77	-0.6997337	77	-0.6725703	77	-0.6962847	77	-0.696012	77	-0.662935	77	-0.6620041
77.2	-0.7515607	77.2	-0.8040199	77.2	-0.7682012	77.2	-0.7248981	77.2	-0.7561588	77.2	-0.7366596	77.2	-0.7362047	77.2	-0.7130366	77.2	-0.6723657	77.2	-0.7167315	77.2	-0.6887613	77.2	-0.6582201	77.2	-0.6871681	77.2	-0.6861564	77.2	-0.6498097	77.2	-0.644398
77.4	-0.7419431	77.4	-0.7933601	77.4	-0.7587621	77.4	-0.7134206	77.4	-0.7493221	77.4	-0.7234466	77.4	-0.7268093	77.4	-0.7058634	77.4	-0.6620014	77.4	-0.7105544	77.4	-0.6855393	77.4	-0.6529057	77.4	-0.67219	77.4	-0.6795738	77.4	-0.6466271	77.4	-0.6407478
77.6	-0.7308382	77.6	-0.7837937	77.6	-0.7479004	77.6	-0.7060073	77.6	-0.7414243	77.6	-0.7170135	77.6	-0.7184349	77.6	-0.696929	77.6	-0.6559529	77.6	-0.7037501	77.6	-0.6752932	77.6	-0.6438626	77.6	-0.6663001	77.6	-0.6703517	77.6	-0.6334504	77.6	-0.6354038
77.8	-0.7249917	77.8	-0.7733454	77.8	-0.7425879	77.8	-0.7007748	77.8	-0.7331421	77.8	-0.7109212	77.8	-0.709044	77.8	-0.6879484	77.8	-0.6462253	77.8	-0.7012789	77.8	-0.6637436	77.8	-0.6375859	77.8	-0.6630239	77.8	-0.6594936	77.8	-0.6258229	77.8	-0.6262764
78	-0.7207813	78	-0.7624944	78	-0.7317344	78	-0.6915043	78	-0.7231678	78	-0.7042399	78	-0.7060676	78	-0.6822289	78	-0.6349832	78	-0.6901482	78	-0.6514176	78	-0.6262358	78	-0.6505832	78	-0.655953	78	-0.6204255	78	-0.6140787
78.2	-0.7122372	78.2	-0.7580727	78.2	-0.727015	78.2	-0.6844271	78.2	-0.7202254	78.2	-0.6934131	78.2	-0.6932558	78.2	-0.6753004	78.2	-0.6291873	78.2	-0.6811041	78.2	-0.6511841	78.2	-0.61792	78.2	-0.6474026	78.2	-0.6442248	78.2	-0.610855	78.2	-0.6075704
78.4	-0.7022822	78.4	-0.7516832	78.4	-0.7196991	78.4	-0.6784983	78.4	-0.7088854	78.4	-0.6902674	78.4	-0.6839815	78.4	-0.6685841	78.4	-0.6269304	78.4	-0.6733045	78.4	-0.6391482	78.4	-0.6097743	78.4	-0.6373084	78.4	-0.6392866	78.4	-0.6077099	78.4	-0.6054969
78.6	-0.6982781	78.6	-0.7493252	78.6	-0.7131836	78.6	-0.6691046	78.6	-0.7020059	78.6	-0.6893809	78.6	-0.6801158	78.6	-0.6637363	78.6	-0.6189731	78.6	-0.6680593	78.6	-0.6376693	78.6	-0.6076771	78.6	-0.6302199	78.6	-0.6311933	78.6	-0.5968013	78.6	-0.6006831
78.8	-0.694987	78.8	-0.7415496	78.8	-0.7069489	78.8	-0.653869	78.8	-0.6984587	78.8	-0.6750647	78.8	-0.6797355	78.8	-0.6542812	78.8	-0.6111003	78.8	-0.6618755	78.8	-0.6333461	78.8	-0.5957693	78.8	-0.6268945	78.8	-0.6295028	78.8	-0.5899637	78.8	-0.5920491
79	-0.6827149	79	-0.7389967	79	-0.697286	79	-0.6530221	79	-0.6910297	79	-0.675402	79	-0.6718795	79	-0.6499098	79	-0.6028156	79	-0.649479	79	-0.6265642	79	-0.591318	79	-0.6204202	79	-0.6182003	79	-0.5842026	79	-0.5928633
79.2	-0.6788614	79.2	-0.7333523	79.2	-0.6954168	79.2	-0.6529359	79.2	-0.6861568	79.2	-0.6671053	79.2	-0.6631309	79.2	-0.6438332	79.2	-0.6018763	79.2	-0.653331	79.2	-0.6250211	79.2	-0.5885664	79.2	-0.6163372	79.2	-0.612875	79.2	-0.5780181	79.2	-0.5807617
79.4	-0.6756032	79.4	-0.7231206	79.4	-0.6891307	79.4	-0.6435353	79.4	-0.6860762	79.4	-0.6609396	79.4	-0.6648497	79.4	-0.6402396	79.4	-0.5991293	79.4	-0.6455598	79.4	-0.6110826	79.4	-0.584314	79.4	-0.6081102	79.4	-0.6029299	79.4	-0.574675	79.4	-0.5752474
79.6	-0.6702943	79.6	-0.7181028	79.6	-0.6817647	79.6	-0.6388146	79.6	-0.679027	79.6	-0.656238	79.6	-0.6558864	79.6	-0.6349701	79.6	-0.5899591	79.6	-0.643544	79.6	-0.61206	79.6	-0.5769425	79.6	-0.602241	79.6	-0.6081857	79.6	-0.5684105	79.6	-0.5742
79.8	-0.6691281	79.8	-0.7192432	79.8	-0.6792662	79.8	-0.6381521	79.8	-0.6743414	79.8	-0.6539184	79.8	-0.6504521	79.8	-0.6340188	79.8	-0.5923535	79.8	-0.6402236	79.8	-0.6099775	79.8	-0.5760285	79.8	-0.6010348	79.8	-0.6006355	79.8	-0.5700992	79.8	-0.5697809
80	-4.896247	80	-4.934139	80	-4.938017	80	-4.828076	80	-4.85276	80	-4.819515	80	-4.81401	80	-4.635594	80	-4.55226	80	-4.583939	80	-4.58521	80	-4.469298	80	-4.57819	80	-4.651942	80	-4.485884	80	-4.377506
80.2	-5.080688	80.2	-5.19208	80.2	-5.188403	80.2	-5.065075	80.2	-5.068146	80.2	-5.074098	80.2	-5.043738	80.2	-4.884398	80.2	-4.789613	80.2	-4.888113	80.2	-4.873148	80.2	-4.764253	80.2	-4.844403	80.2	-4.933054	80.2	-4.772273	80.2	-4.650138
80.4	-5.176361	80.4	-5.308466	80.4	-5.301098	80.4	-5.18201	80.4	-5.180282	80.4	-5.183504	80.4	-5.160944	80.4	-5.005429	80.4	-4.894718	80.4	-5.01529	80.4	-4.981933	80.4	-4.884252	80.4	-4.961879	80.4	-5.045553	80.4	-4.885983	80.4	-4.763155
80.6	-5.235885	80.6	-5.379168	80.6	-5.373055	80.6	-5.243322	80.6	-5.247224	80.6	-5.251058	80.6	-5.229117	80.6	-5.075579	80.6	-4.958418	80.6	-5.083055	80.6	-5.048697	80.6	-4.949012	80.6	-5.030997	80.6	-5.115532	80.6	-4.956662	80.6	-4.830793
80.8	-5.286938	80.8	-5.433645	80.8	-5.418593	80.8	-5.295214	80.8	-5.300272	80.8	-5.304291	80.8	-5.283773	80.8	-5.122193	80.8	-5.001376	80.8	-5.132208	80.8	-5.105282	80.8	-4.999343	80.8	-5.078826	80.8	-5.16576	80.8	-5.004006	80.8	-4.88211
81	-5.318917	81	-5.475309	81	-5.460284	81	-5.333078	81	-5.334824	81	-5.336976	81	-5.322131	81	-5.16101	81	-5.042618	81	-5.16958	81	-5.149139	81	-5.036415	81	-5.123301	81	-5.210637	81	-5.04905	81	-4.919419
81.2	-5.346984	81.2	-5.503033	81.2	-5.490062	81.2	-5.364944	81.2	-5.367476	81.2	-5.36731	81.2	-5.353567	81.2	-5.195574	81.2	-5.069109	81.2	-5.204832	81.2	-5.174682	81.2	-5.070358	81.2	-5.146714	81.2	-5.237856	81.2	-5.083219	81.2	-4.949843
81.4	-5.373978	81.4	-5.531081	81.4	-5.514005	81.4	-5.391746	81.4	-5.393182	81.4	-5.393296	81.4	-5.378829	81.4	-5.214662	81.4	-5.099053	81.4	-5.230996	81.4	-5.201657	81.4	-5.096942	81.4	-5.17091	81.4	-5.266978	81.4	-5.102218	81.4	-4.973264
81.6	-5.395339	81.6	-5.550987	81.6	-5.536205	81.6	-5.42143	81.6	-5.415374	81.6	-5.423163	81.6	-5.403956	81.6	-5.241912	81.6	-5.122034	81.6	-5.252515	81.6	-5.226345	81.6	-5.115346	81.6	-5.197323	81.6	-5.286359	81.6	-5.132471	81.6	-4.991807
81.8	-5.420267	81.8	-5.578072	81.8	-5.563366	81.8	-5.437055	81.8	-5.434317	81.8	-5.440771	81.8	-5.428197	81.8	-5.263247	81.8	-5.142282	81.8	-5.273517	81.8	-5.24744	81.8	-5.142985	81.8	-5.220548	81.8	-5.308548	81.8	-5.145291	81.8	-5.010881
82	-5.43469	82	-5.589317	82	-5.574897	82	-5.45542	82	-5.456903	82	-5.460212	82	-5.445902	82	-5.271916	82	-5.158772	82	-5.291006	82	-5.266029	82	-5.159479	82	-5.234759	82	-5.330314	82	-5.171406	82	-5.033362
82.2	-5.452168	82.2	-5.60893	82.2	-5.59842	82.2	-5.47342	82.2	-5.471735	82.2	-5.478096	82.2	-5.462001	82.2	-5.293288	82.2	-5.17688	82.2	-5.309915	82.2	-5.283813	82.2	-5.17311	82.2	-5.248151	82.2	-5.343308	82.2	-5.179819	82.2	-5.048971
82.4	-5.469283	82.4	-5.62884	82.4	-5.610094	82.4	-5.487933	82.4	-5.48325	82.4	-5.492139	82.4	-5.476848	82.4	-5.311355	82.4	-5.189002	82.4	-5.322692	82.4	-5.294695	82.4	-5.185831	82.4	-5.262918	82.4	-5.356368	82.4	-5.194864	82.4	-5.062339
82.6	-5.4856	82.6	-5.637494	82.6	-5.623643	82.6	-5.500002	82.6	-5.500592	82.6	-5.506751	82.6	-5.4891	82.6	-5.324317	82.6	-5.199702	82.6	-5.340714	82.6	-5.304832	82.6	-5.204588	82.6	-5.278366	82.6	-5.372715	82.6	-5.211846	82.6	-5.075839
82.8	-5.492935	82.8	-5.651812	82.8	-5.640728	82.8	-5.511791	82.8	-5.514623	82.8	-5.519305	82.8	-5.503811	82.8	-5.329523	82.8	-5.212572	82.8	-5.350148	82.8	-5.318271	82.8	-5.206005	82.8	-5.292544	82.8	-5.385234	82.8	-5.223572	82.8	-5.086216
83	-5.500781	83	-5.654013	83	-5.649998	83	-5.526521	83	-5.524606	83	-5.530714	83	-5.512908	83	-5.347153	83	-5.220457	83	-5.363553	83	-5.33443	83	-5.221532	83	-5.300496	83	-5.403185	83	-5.233641	83	-5.103686
83.2	-5.517772	83.2	-5.674514	83.2	-5.658299	83.2	-5.538583	83.2	-5.532606	83.2	-5.541987	83.2	-5.52668	83.2	-5.358114	83.2	-5.239215	83.2	-5.370826	83.2	-5.344513	83.2	-5.238858	83.2	-5.309047	83.2	-5.412229	83.2	-5.246392	83.2	-5.107953
83.4	-5.526338	83.4	-5.691774	83.4	-5.668581	83.4	-5.549106	83.4	-5.548326	83.4	-5.549084	83.4	-5.537389	83.4	-5.368256	83.4	-5.243584	83.4	-5.385145	83.4	-5.347433	83.4	-5.243891	83.4	-5.326561	83.4	-5.421634	83.4	-5.259776	83.4	-5.12038
83.6	-5.53914	83.6	-5.692797	83.6	-5.683941	83.6	-5.557122	83.6	-5.557522	83.6	-5.565156	83.6	-5.544526	83.6	-5.375762	83.6	-5.250436	83.6	-5.386988	83.6	-5.361825	83.6	-5.254234	83.6	-5.333482	83.6	-5.428968	83.6	-5.26263	83.6	-5.128223
83.8	-5.54911	83.8	-5.703555	83.8	-5.691313	83.8	-5.567542	83.8	-5.56156	83.8	-5.570265	83.8	-5.555067	83.8	-5.384083	83.8	-5.259132	83.8	-5.39782	83.8	-5.3662	83.8	-5.266752	83.8	-5.33928	83.8	-5.436066	83.8	-5.274984	83.8	-5.135513
84	-5.552778	84	-5.710955	84	-5.699373	84	-5.576992	84	-5.571848	84	-5.577747	84	-5.564743	84	-5.394538	84	-5.266913	84	-5.406039	84	-5.375758	84	-5.268246	84	-5.351681	84	-5.443429	84	-5.28011	84	-5.146038
84.2	-5.565737	84.2	-5.725423	84.2	-5.709031	84.2	-5.586371	84.2	-5.582758	84.2	-5.590303	84.2	-5.571274	84.2	-5.399692	84.2	-5.270483	84.2	-5.418597	84.2	-5.385117	84.2	-5.28175	84.2	-5.353508	84.2	-5.454796	84.2	-5.289741	84.2	-5.154346
84.4	-5.576494	84.4	-5.729363	84.4	-5.71465	84.4	-5.588634	84.4	-5.587948	84.4	-5.598965	84.4	-5.581621	84.4	-5.41053	84.4	-5.279844	84.4	-5.426549	84.4	-5.392832	84.4	-5.286512	84.4	-5.360698	84.4	-5.460359	84.4	-5.297968	84.4	-5.164177
84.6	-5.573487	84.6	-5.736128	84.6	-5.720388	84.6	-5.598806	84.6	-5.594086	84.6	-5.604034	84.6	-5.591086	84.6	-5.417481	84.6	-5.288787	84.6	-5.427563	84.6	-5.398659	84.6	-5.294615	84.6	-5.365861	84.6	-5.464494	84.6	-5.303535	84.6	-5.168532
84.8	-5.577393	84.8	-5.740142	84.8	-5.724844	84.8	-5.601256	84.8	-5.601182	84.8	-5.610472	84.8	-5.588308	84.8	-5.419363	84.8	-5.294267	84.8	-5.434924	84.8	-5.400133	84.8	-5.295427	84.8	-5.371584	84.8	-5.470664	84.8	-5.306922	84.8	-5.171214
85	-0.9333603	85	-1.004013	85	-0.9441576	85	-0.88908	85	-0.9407061	85	-0.9033011	85	-0.9056188	85	-0.8831607	85	-0.8437908	85	-0.9218878	85	-0.8785678	85	-0.8345189	85	-0.8677309	85	-0.8639065	85	-0.8219662	85	-0.8264026
85.2	-0.8962713	85.2	-0.9597094	85.2	-0.8998976	85.2	-0.8567523	85.2	-0.8987032	85.2	-0.8620304	85.2	-0.8650243	85.2	-0.8448037	85.2	-0.8133781	85.2	-0.8820515	85.2	-0.840905	85.2	-0.8049199	85.2	-0.8324466	85.2	-0.8273859	85.2	-0.785022	85.2	-0.7816513
85.4	-0.8588797	85.4	-0.9281323	85.4	-0.8663772	85.4	-0.8124828	85.4	-0.8631624	85.4	-0.8239433	85.4	-0.8232574	85.4	-0.8029851	85.4	-0.7752056	85.4	-0.8412789	85.4	-0.8015289	85.4	-0.7648517	85.4	-0.792569	85.4	-0.7904665	85.4	-0.7524331	85.4	-0.7477695
85.6	-0.8200568	85.6	-0.8930517	85.6	-0.8294924	85.6	-0.7810954	85.6	-0.8304004	85.6	-0.7943714	85.6	-0.7960317	85.6	-0.7764763	85.6	-0.7404057	85.6	-0.8124678	85.6	-0.7678821	85.6	-0.7333231	85.6	-0.7621685	85.6	-0.7557677	85.6	-0.714142	85.6	-0.7179495
85.8	-0.7934822	85.8	-0.8630892	85.8	-0.8087251	85.8	-0.7581921	85.8	-0.802451	85.8	-0.7679064	85.8	-0.7657439	85.8	-0.7498413	85.8	-0.7154025	85.8	-0.7885277	85.8	-0.7460495	85.8	-0.7129241	85.8	-0.738732	85.8	-0.727037	85.8	-0.6871287	85.8	-0.6903138
86	-0.7719327	86	-0.8444328	86	-0.7907442	86	-0.733722	86	-0.784057	86	-0.7488364	86	-0.7481459	86	-0.730361	86	-0.6910915	86	-0.7563273	86	-0.7144317	86	-0.6823581	86	-0.7120257	86	-0.7092672	86	-0.6714979	86	-0.6674491
86.2	-0.7554922	86.2	-0.8234531	86.2	-0.7645366	86.2	-0.7158259	86.2	-0.7613991	86.2	-0.7285179	86.2	-0.7253733	86.2	-0.7117735	86.2	-0.6763749	86.2	-0.7464758	86.2	-0.7037444	86.2	-0.6662601	86.2	-0.6964463	86.2	-0.6885759	86.2	-0.6479515	86.2	-0.6538289
86.4	-0.7438037	86.4	-0.8101465	86.4	-0.7474592	86.4	-0.6968462	86.4	-0.7504984	86.4	-0.7119648	86.4	-0.7109635	86.4	-0.6954365	86.4	-0.6564488	86.4	-0.7315013	86.4	-0.6885653	86.4	-0.6508969	86.4	-0.6754891	86.4	-0.6712503	86.4	-0.6340398	86.4	-0.6346321
86.6	-0.7266307	86.6	-0.7942098	86.6	-0.7328482	86.6	-0.6859831	86.6	-0.7357148	86.6	-0.6914603	86.6	-0.6968274	86.6	-0.6842755	86.6	-0.6483448	86.6	-0.7104317	86.6	-0.6742815	86.6	-0.6358755	86.6	-0.6652933	86.6	-0.656296	86.6	-0.6143702	86.6	-0.6242375
86.8	-0.7129795	86.8	-0.7807503	86.8	-0.7239332	86.8	-0.6734042	86.8	-0.7201715	86.8	-0.6844719	86.8	-0.6875085	86.8	-0.6686781	86.8	-0.6314115	86.8	-0.7006577	86.8	-0.6627008	86.8	-0.6286466	86.8	-0.6548679	86.8	-0.6442511	86.8	-0.6090169	86.8	-0.6063184
87	-0.7062572	87	-0.7718629	87	-0.7132208	87	-0.6581537	87	-0.7095976	87	-0.6751837	87	-0.6764841	87	-0.6613574	87	-0.6241813	87	-0.6915396	87	-0.6451577	87	-0.612203	87	-0.6388406	87	-0.6327943	87	-0.595093	87	-0.5954596
87.2	-0.698483	87.2	-0.7650531	87.2	-0.6992471	87.2	-0.646972	87.2	-0.7014139	87.2	-0.6638697	87.2	-0.6673625	87.2	-0.6491796	87.2	-0.6111117	87.2	-0.6842363	87.2	-0.6405619	87.2	-0.6046295	87.2	-0.628464	87.2	-0.6207727	87.2	-0.5822955	87.2	-0.590036
87.4	-0.6893792	87.4	-0.7549961	87.4	-0.6873068	87.4	-0.6356207	87.4	-0.6918179	87.4	-0.6521463	87.4	-0.6542822	87.4	-0.6379403	87.4	-0.6048008	87.4	-0.6721539	87.4	-0.6255224	87.4	-0.5949081	87.4	-0.6204683	87.4	-0.6120984	87.4	-0.5728189	87.4	-0.5806363
87.6	-0.6754206	87.6	-0.7416345	87.6	-0.6780573	87.6	-0.6312501	87.6	-0.6810506	87.6	-0.6463996	87.6	-0.6404265	87.6	-0.6304069	87.6	-0.5965854	87.6	-0.6630787	87.6	-0.6149573	87.6	-0.5860562	87.6	-0.6120538	87.6	-0.5998117	87.6	-0.5659798	87.6	-0.5741537
87.8	-0.6718888	87.8	-0.7318066	87.8	-0.6770602	87.8	-0.6215312	87.8	-0.6746289	87.8	-0.6321599	87.8	-0.6364348	87.8	-0.625825	87.8	-0.5901064	87.8	-0.6592615	87.8	-0.6109055	87.8	-0.5789738	87.8	-0.6064239	87.8	-0.5900728	87.8	-0.5615757	87.8	-0.5630224
88	-0.6567799	88	-0.7276952	88	-0.6683962	88	-0.6139722	88	-0.6656752	88	-0.6257082	88	-0.6304298	88	-0.6177445	88	-0.5830784	88	-0.647714	88	-0.60691	88	-0.5702041	88	-0.5965012	88	-0.5888339	88	-0.5491387	88	-0.5571531
88.2	-0.6541067	88.2	-0.724929	88.2	-0.6583457	88.2	-0.6046504	88.2	-0.6619599	88.2	-0.6212337	88.2	-0.6201195	88.2	-0.6092702	88.2	-0.5741402	88.2	-0.6462538	88.2	-0.5985249	88.2	-0.5610955	88.2	-0.5895104	88.2	-0.5814553	88.2	-0.5453382	88.2	-0.5531008
88.4	-0.646607	88.4	-0.7132217	88.4	-0.6500611	88.4	-0.5986926	88.4	-0.6564876	88.4	-0.614955	88.4	-0.6170033	88.4	-0.603715	88.4	-0.5679111	88.4	-0.6316542	88.4	-0.5881807	88.4	-0.5567958	88.4	-0.5834798	88.4	-0.5707084	88.4	-0.5414328	88.4	-0.5460547
88.6	-0.6414627	88.6	-0.7106356	88.6	-0.6470544	88.6	-0.5901863	88.6	-0.6464047	88.6	-0.6113436	88.6	-0.6124868	88.6	-0.5950324	88.6	-0.5624025	88.6	-0.6247336	88.6	-0.5801684	88.6	-0.5503782	88.6	-0.5775925	88.6	-0.5652457	88.6	-0.5349503	88.6	-0.5400915
88.8	-0.6412629	88.8	-0.7021649	88.8	-0.6460031	88.8	-0.5871341	88.8	-0.6396335	88.8	-0.6028962	88.8	-0.6055768	88.8	-0.5965672	88.8	-0.5509214	88.8	-0.6235417	88.8	-0.5779534	88.8	-0.5453806	88.8	-0.5730916	88.8	-0.5626358	88.8	-0.5261155	88.8	-0.536822
89	-0.6281149	89	-0.6949367	89	-0.6367602	89	-0.5827258	89	-0.6378592	89	-0.5987306	89	-0.5996114	89	-0.5849568	89	-0.5492325	89	-0.6225916	89	-0.5714188	89	-0.5399876	89	-0.5676115	89	-0.5579951	89	-0.5200224	89	-0.5281863
89.2	-0.6264885	89.2	-0.6906693	89.2	-0.6301967	89.2	-0.5778883	89.2	-0.6320831	89.2	-0.5945914	89.2	-0.591812	89.2	-0.5855083	89.2	-0.543024	89.2	-0.6137887	89.2	-0.5638009	89.2	-0.5343772	89.2	-0.5597479	89.2	-0.5504868	89.2	-0.5199636	89.2	-0.5242417
89.4	-0.6228389	89.4	-0.6841791	89.4	-0.6260571	89.4	-0.570337	89.4	-0.6244386	89.4	-0.590013	89.4	-0.588732	89.4	-0.5769714	89.4	-0.5434499	89.4	-0.6105293	89.4	-0.5627071	89.4	-0.5322568	89.4	-0.5509422	89.4	-0.5482186	89.4	-0.514116	89.4	-0.5171059
89.6	-0.6122034	89.6	-0.6831253	89.6	-0.6223944	89.6	-0.5693415	89.6	-0.6179397	89.6	-0.581549	89.6	-0.5827248	89.6	-0.5696466	89.6	-0.5399252	89.6	-0.6051396	89.6	-0.5567651	89.6	-0.5273412	89.6	-0.5521677	89.6	-0.5470718	89.6	-0.5078959	89.6	-0.5158157
89.8	-0.6170945	89.8	-0.6767771	89.8	-0.6167635	89.8	-0.5647137	89.8	-0.6161661	89.8	-0.5832632	89.8	-0.5820158	89.8	-0.566489	89.8	-0.5333777	89.8	-0.5992069	89.8	-0.5574144	89.8	-0.5205225	89.8	-0.5509019	89.8	-0.5411373	89.8	-0.5038577	89.8	-0.5119664
90	-0.539262	90	-0.5922248	90	-0.540064	90	-0.4857662	90	-0.541215	90	-0.500151	90	-0.5041867	90	-0.4914001	90	-0.4684965	90	-0.53196	90	-0.485461	90	-0.4536734	90	-0.4836971	90	-0.4742721	90	-0.4437404	90	-0.455347
90.2	-0.5331042	90.2	-0.5914832	90.2	-0.530419	90.2	-0.4825454	90.2	-0.5383484	90.2	-0.5040333	90.2	-0.5028979	90.2	-0.491527	90.2	-0.4673443	90.2	-0.5292163	90.2	-0.4852288	90.2	-0.4584619	90.2	-0.4777372	90.2	-0.4737204	90.2	-0.4455476	90.2	-0.4526745
90.4	-0.530038	90.4	-0.5929711	90.4	-0.53158	90.4	-0.4791051	90.4	-0.5340153	90.4	-0.4950291	90.4	-0.5033334	90.4	-0.491803	90.4	-0.4628924	90.4	-0.524459	90.4	-0.4852079	90.4	-0.4472841	90.4	-0.4797456	90.4	-0.4675473	90.4	-0.4430323	90.4	-0.4485304
90.6	-0.5265319	90.6	-0.5867004	90.6	-0.5303391	90.6	-0.4788351	90.6	-0.5331874	90.6	-0.4914272	90.6	-0.4988271	90.6	-0.4895203	90.6	-0.462276	90.6	-0.5257889	90.6	-0.4818512	90.6	-0.4505484	90.6	-0.4728731	90.6	-0.4663784	90.6	-0.4356263	90.6	-0.443907
90.8	-0.5290445	90.8	-0.5857463	90.8	-0.5257853	90.8	-0.4722755	90.8	-0.5336224	90.8	-0.4905878	90.8	-0.4944003	90.8	-0.4820035	90.8	-0.4655796	90.8	-0.523385	90.8	-0.4840187	90.8	-0.4466329	90.8	-0.4753518	90.8	-0.4657291	90.8	-0.4385273	90.8	-0.4429176
91	-0.5238128	91	-0.5840787	91	-0.5246775	91	-0.4731899	91	-0.5294431	91	-0.4897839	91	-0.491668	91	-0.4777903	91	-0.4567928	91	-0.5219027	91	-0.4751529	91	-0.4460184	91	-0.4714841	91	-0.4669181	91	-0.4359919	91	-0.4443627
91.2	-0.5231136	91.2	-0.5828497	91.2	-0.5187355	91.2	-0.4675397	91.2	-0.5235633	91.2	-0.4853093	91.2	-0.4943875	91.2	-0.4770316	91.2	-0.4565719	91.2	-0.5221626	91.2	-0.4768394	91.2	-0.4472541	91.2	-0.4681951	91.2	-0.4617578	91.2	-0.4345579	91.2	-0.4446934
91.4	-0.5234153	91.4	-0.5798995	91.4	-0.5210069	91.4	-0.4733392	91.4	-0.523426	91.4	-0.4819421	91.4	-0.4880759	91.4	-0.479784	91.4	-0.4524416	91.4	-0.5148444	91.4	-0.4743866	91.4	-0.4408082	91.4	-0.4683919	91.4	-0.4627399	91.4	-0.4373585	91.4	-0.4384663
91.6	-0.5204117	91.6	-0.5825461	91.6	-0.5123844	91.6	-0.4699433	91.6	-0.5250668	91.6	-0.4821297	91.6	-0.4873195	91.6	-0.4763462	91.6	-0.4527537	91.6	-0.5192795	91.6	-0.4697536	91.6	-0.4411732	91.6	-0.4649265	91.6	-0.4602093	91.6	-0.4300163	91.6	-0.4409384
91.8	-0.5222856	91.8	-0.5776544	91.8	-0.5151061	91.8	-0.4653367	91.8	-0.5193616	91.8	-0.4787541	91.8	-0.4835746	91.8	-0.4748442	91.8	-0.4523734	91.8	-0.5120531	91.8	-0.4685501	91.8	-0.4413443	91.8	-0.4673124	91.8	-0.4565419	91.8	-0.4244088	91.8	-0.4384495
92	-0.5181754	92	-0.5745038	92	-0.5155509	92	-0.4632637	92	-0.5160565	92	-0.4774915	92	-0.4845786	92	-0.4749741	92	-0.4530028	92	-0.5133854	92	-0.4698153	92	-0.4401548	92	-0.4677061	92	-0.4557511	92	-0.4227147	92	-0.4322824
92.2	-0.5103139	92.2	-0.5701345	92.2	-0.5101778	92.2	-0.4575081	92.2	-0.5142748	92.2	-0.475218	92.2	-0.4808746	92.2	-0.4732906	92.2	-0.4499643	92.2	-0.5102106	92.2	-0.4635373	92.2	-0.4377648	92.2	-0.4609935	92.2	-0.4516728	92.2	-0.4234741	92.2	-0.4327982
92.4	-0.5080168	92.4	-0.5713869	92.4	-0.5096107	92.4	-0.4592011	92.4	-0.515516	92.4	-0.4772257	92.4	-0.4776392	92.4	-0.4719031	92.4	-0.4468922	92.4	-0.5116841	92.4	-0.4671428	92.4	-0.435624	92.4	-0.4635713	92.4	-0.4575202	92.4	-0.4236884	92.4	-0.4342629
92.61	-0.5098873	92.61	-0.5632287	92.61	-0.5099096	92.61	-0.4609574	92.61	-0.5126055	92.61	-0.4729654	92.61	-0.4748593	92.61	-0.4706095	92.6	-0.4422626	92.6	-0.5069355	92.6	-0.4658825	92.6	-0.4365838	92.6	-0.4556013	92.6	-0.4522232	92.6	-0.4212882	92.6	-0.4301939
92.8	-0.5075656	92.8	-0.5636656	92.8	-0.5076628	92.8	-0.4592799	92.8	-0.5102772	92.8	-0.4753942	92.8	-0.4751583	92.8	-0.4655534	92.8	-0.4447429	92.8	-0.5067992	92.8	-0.4641277	92.8	-0.4288582	92.8	-0.4591673	92.8	-0.4496399	92.8	-0.4184515	92.8	-0.4290199
93	-0.508555	93	-0.5669537	93	-0.50204	93	-0.4549371	93	-0.5090683	93	-0.4669103	93	-0.473112	93	-0.4659187	93	-0.4436463	93	-0.5037411	93	-0.4619754	93	-0.4259524	93	-0.4599954	93	-0.4486254	93	-0.4191856	93	-0.4242351
93.2	-0.5038168	93.2	-0.5628058	93.2	-0.5032238	93.2	-0.4579814	93.2	-0.508665	93.2	-0.4697184	93.2	-0.4695032	93.2	-0.4629828	93.2	-0.4440784	93.2	-0.4983188	93.2	-0.4581609	93.2	-0.429795	93.2	-0.454915	93.2	-0.4483729	93.2	-0.4168796	93.2	-0.4221151
93.4	-0.503121	93.4	-0.5613658	93.4	-0.5016589	93.4	-0.4521871	93.4	-0.5077154	93.4	-0.4650387	93.4	-0.4724181	93.4	-0.465051	93.4	-0.4380711	93.4	-0.504844	93.4	-0.4586399	93.4	-0.4276008	93.4	-0.4525943	93.4	-0.4437745	93.4	-0.4120282	93.4	-0.4287948
93.6	-0.5015578	93.6	-0.5593126	93.6	-0.5023729	93.6	-0.4476986	93.6	-0.4981338	93.6	-0.464541	93.6	-0.474897	93.6	-0.4567341	93.6	-0.4403588	93.6	-0.5008079	93.6	-0.4579894	93.6	-0.4245589	93.6	-0.4540021	93.6	-0.4423848	93.6	-0.4138035	93.6	-0.4223489
93.8	-0.501586	93.8	-0.5599017	93.8	-0.4991076	93.8	-0.4483014	93.8	-0.5043086	93.8	-0.4644163	93.8	-0.4708337	93.8	-0.4571127	93.8	-0.4380856	93.8	-0.5011775	93.8	-0.4561056	93.8	-0.4291394	93.8	-0.4509019	93.8	-0.4499612	93.8	-0.4124948	93.8	-0.423043
94	-0.4988998	94	-0.5578536	94	-0.4989404	94	-0.4480147	94	-0.4970404	94	-0.4620106	94	-0.4655253	94	-0.4592899	94	-0.4368181	94	-0.4974938	94	-0.4490038	94	-0.4273391	94	-0.4523739	94	-0.4399611	94	-0.4127954	94	-0.4220112
94.2	-0.4969625	94.2	-0.5539517	94.2	-0.497004	94.2	-0.4424736	94.2	-0.5031304	94.2	-0.4596463	94.2	-0.4633696	94.2	-0.458062	94.2	-0.4329201	94.2	-0.4971146	94.2	-0.4523729	94.2	-0.4204639	94.2	-0.4477195	94.2	-0.4363739	94.2	-0.40909	94.2	-0.4183987
94.4	-0.496934	94.4	-0.5556548	94.4	-0.4933342	94.4	-0.448153	94.4	-0.4980384	94.4	-0.4602599	94.4	-0.4635431	94.4	-0.4580325	94.4	-0.4299461	94.4	-0.4931851	94.4	-0.4506271	94.4	-0.4188057	94.4	-0.4446144	94.4	-0.4326477	94.4	-0.4074324	94.4	-0.4221877
94.6	-0.4952363	94.6	-0.5528517	94.6	-0.4932168	94.6	-0.4436807	94.6	-0.4978602	94.6	-0.4552357	94.6	-0.4599489	94.6	-0.4578789	94.6	-0.4278438	94.6	-0.4920065	94.6	-0.4504233	94.6	-0.4215564	94.6	-0.4470052	94.6	-0.4382861	94.6	-0.4017715	94.6	-0.4184954
94.8	-0.4889636	94.8	-0.5524809	94.8	-0.4897576	94.8	-0.4394899	94.8	-0.4933134	94.8	-0.4580555	94.8	-0.4593194	94.8	-0.4495211	94.8	-0.4293671	94.8	-0.4909945	94.8	-0.4517457	94.8	-0.4174563	94.8	-0.441623	94.8	-0.4346438	94.8	-0.4059803	94.8	-0.4172435
95	-0.4926763	95	-0.5480188	95	-0.4906922	95	-0.4387349	95	-0.4915575	95	-0.4584806	95	-0.4578717	95	-0.4491868	95	-0.4288295	95	-0.4905154	95	-0.4465159	95	-0.4184691	95	-0.4407853	95	-0.4301608	95	-0.4014503	95	-0.4107461
95.2	-0.4915919	95.2	-0.5479035	95.2	-0.4863297	95.2	-0.4395488	95.2	-0.4933666	95.2	-0.4537662	95.2	-0.458203	95.2	-0.4442323	95.2	-0.4256457	95.2	-0.489305	95.2	-0.4451244	95.2	-0.416058	95.2	-0.4437308	95.2	-0.4360133	95.2	-0.4007146	95.2	-0.4161049
95.4	-0.4881569	95.4	-0.5467837	95.4	-0.4819076	95.4	-0.4383705	95.4	-0.4932629	95.4	-0.4535672	95.4	-0.4554987	95.4	-0.4474724	95.4	-0.4227606	95.4	-0.4862884	95.4	-0.4436581	95.4	-0.416397	95.4	-0.4451417	95.4	-0.4301712	95.4	-0.4034263	95.4	-0.4085636
95.6	-0.4858504	95.6	-0.5443029	95.6	-0.485021	95.6	-0.4379699	95.6	-0.4901014	95.6	-0.4490417	95.6	-0.4506168	95.6	-0.4480712	95.6	-0.426359	95.6	-0.4886748	95.6	-0.4451946	95.6	-0.4171608	95.6	-0.4375386	95.6	-0.4342445	95.6	-0.4017772	95.6	-0.4109704
95.8	-0.484833	95.8	-0.5427869	95.8	-0.4853348	95.8	-0.4358793	95.8	-0.4858257	95.8	-0.4485295	95.8	-0.4523904	95.8	-0.441834	95.8	-0.4280604	95.8	-0.4847949	95.8	-0.4405199	95.8	-0.4075926	95.8	-0.4338748	95.8	-0.4284429	95.8	-0.3988143	95.8	-0.4089211
96	-0.4834065	96	-0.546567	96	-0.4831885	96	-0.4315689	96	-0.4874966	96	-0.4466883	96	-0.4516181	96	-0.4442361	96	-0.4205873	96	-0.480681	96	-0.4378584	96	-0.4107591	96	-0.4330192	96	-0.4302157	96	-0.4009197	96	-0.4065516
96.2	-0.4757708	96.2	-0.5448965	96.2	-0.4800119	96.2	-0.4291992	96.2	-0.4890724	96.2	-0.4442031	96.2	-0.4516732	96.2	-0.4382679	96.2	-0.4192004	96.2	-0.48544	96.2	-0.4417029	96.2	-0.4096061	96.2	-0.4311443	96.2	-0.4261469	96.2	-0.395745	96.2	-0.4065922
96.4	-0.4835053	96.4	-0.5393505	96.4	-0.4842341	96.4	-0.4333995	96.4	-0.4831424	96.4	-0.4442569	96.4	-0.4443218	96.4	-0.4386994	96.4	-0.4158837	96.4	-0.4828366	96.4	-0.4365434	96.4	-0.4086189	96.4	-0.4317687	96.4	-0.4244488	96.4	-0.3905843	96.4	-0.4045941
96.6	-0.482942	96.6	-0.5425618	96.6	-0.478728	96.6	-0.4276855	96.6	-0.4823146	96.6	-0.4459584	96.6	-0.4466912	96.6	-0.440972	96.6	-0.4151525	96.6	-0.4795494	96.6	-0.4360612	96.6	-0.406883	96.6	-0.4346856	96.6	-0.4245569	96.6	-0.3941689	96.6	-0.4051442
96.8	-0.4782541	96.8	-0.5350665	96.8	-0.4772958	96.8	-0.4259135	96.8	-0.4806322	96.8	-0.4454046	96.8	-0.4463841	96.8	-0.4319404	96.8	-0.4223641	96.8	-0.4775674	96.8	-0.4312417	96.8	-0.4086853	96.8	-0.4271058	96.8	-0.4225006	96.8	-0.3881056	96.8	-0.4001057
97	-0.4788907	97	-0.5408023	97	-0.4730595	97	-0.4293884	97	-0.4789049	97	-0.4420131	97	-0.4496252	97	-0.4354896	97	-0.4102981	97	-0.4873492	97	-0.4379477	97	-0.405567	97	-0.4326967	97	-0.4192029	97	-0.3910352	97	-0.3987727
97.2	-0.4785612	97.2	-0.5355206	97.2	-0.4725882	97.2	-0.4198698	97.2	-0.4834881	97.2	-0.4392731	97.2	-0.4405064	97.2	-0.4397812	97.2	-0.415874	97.2	-0.4804704	97.2	-0.4341547	97.2	-0.4083418	97.2	-0.4295861	97.2	-0.4211384	97.2	-0.3911607	97.2	-0.397292
97.4	-0.4759414	97.4	-0.5349325	97.4	-0.4723259	97.4	-0.4253371	97.4	-0.4821673	97.4	-0.4415587	97.4	-0.4455773	97.4	-0.4304774	97.4	-0.4155237	97.4	-0.4694989	97.4	-0.4293402	97.4	-0.4030306	97.4	-0.4256378	97.4	-0.4201204	97.4	-0.388336	97.4	-0.4006743
97.6	-0.4762321	97.6	-0.538356	97.6	-0.4735883	97.6	-0.4249667	97.6	-0.4759253	97.6	-0.439578	97.6	-0.4390329	97.6	-0.4364964	97.6	-0.4123888	97.6	-0.4750385	97.6	-0.4305617	97.6	-0.3981355	97.6	-0.4269943	97.6	-0.4175127	97.6	-0.3869419	97.6	-0.3988197
97.8	-0.4728169	97.8	-0.5370073	97.8	-0.4691394	97.8	-0.4203966	97.8	-0.4777591	97.8	-0.4359645	97.8	-0.4396442	97.8	-0.4312657	97.8	-0.4161474	97.8	-0.4727917	97.8	-0.4258657	97.8	-0.4015814	97.8	-0.4237611	97.8	-0.4167305	97.8	-0.3898852	97.8	-0.4004107
98	-0.471716	98	-0.5282465	98	-0.4645238	98	-0.42789	98	-0.4732747	98	-0.4364154	98	-0.4410856	98	-0.4282933	98	-0.4119497	98	-0.472128	98	-0.429585	98	-0.4027746	98	-0.4205908	98	-0.414843	98	-0.3885362	98	-0.396165
98.2	-0.4733741	98.2	-0.5269394	98.2	-0.4695191	98.2	-0.4229386	98.2	-0.471503	98.2	-0.4337828	98.2	-0.4407687	98.2	-0.4311901	98.2	-0.407523	98.2	-0.4729905	98.2	-0.4279779	98.2	-0.3996621	98.2	-0.4273103	98.2	-0.4144566	98.2	-0.3828946	98.2	-0.3897746
98.4	-0.4711815	98.4	-0.5315409	98.4	-0.4685028	98.4	-0.4160894	98.4	-0.4696613	98.4	-0.4353903	98.4	-0.4356672	98.4	-0.4274663	98.4	-0.4064107	98.4	-0.4660117	98.4	-0.4289151	98.4	-0.3989853	98.4	-0.4212513	98.4	-0.4133198	98.4	-0.3850259	98.4	-0.396533
98.61	-0.4727011	98.61	-0.5286681	98.61	-0.4619422	98.61	-0.4171411	98.61	-0.4726313	98.61	-0.4303012	98.61	-0.438374	98.61	-0.4242292	98.6	-0.410528	98.6	-0.4695303	98.6	-0.4282899	98.6	-0.39824	98.6	-0.423204	98.6	-0.410718	98.6	-0.3808503	98.6	-0.3901093
98.8	-0.4702401	98.8	-0.5269453	98.8	-0.4644632	98.8	-0.4164646	98.8	-0.472209	98.8	-0.4338114	98.8	-0.4353376	98.8	-0.4325932	98.8	-0.4054805	98.8	-0.4657071	98.8	-0.4238455	98.8	-0.3978894	98.8	-0.4195832	98.8	-0.4105315	98.8	-0.3811985	98.8	-0.3924306
99	-0.4659268	99	-0.5234994	99	-0.4649991	99	-0.4131185	99	-0.463957	99	-0.4295845	99	-0.4342285	99	-0.4199482	99	-0.4040482	99	-0.4650041	99	-0.4215949	99	-0.3932821	99	-0.4190713	99	-0.4129981	99	-0.3781874	99	-0.3902012
99.2	-0.4632742	99.2	-0.5209143	99.2	-0.4643176	99.2	-0.4167203	99.2	-0.4667727	99.2	-0.4277445	99.2	-0.4336788	99.2	-0.4231584	99.2	-0.4037969	99.2	-0.4627204	99.2	-0.4241972	99.2	-0.3938858	99.2	-0.4147155	99.2	-0.4065355	99.2	-0.376743	99.2	-0.3934836
99.4	-0.4664023	99.4	-0.5229399	99.4	-0.4609016	99.4	-0.4140712	99.4	-0.4656622	99.4	-0.4286002	99.4	-0.428392	99.4	-0.4208919	99.4	-0.4026847	99.4	-0.4690175	99.4	-0.4219433	99.4	-0.3968939	99.4	-0.4205239	99.4	-0.4072821	99.4	-0.3751313	99.4	-0.3902757
99.6	-0.4654174	99.6	-0.5216541	99.6	-0.4604344	99.6	-0.4126296	99.6	-0.468114	99.6	-0.4259767	99.6	-0.4307893	99.6	-0.4227999	99.62	-0.4025404	99.62	-0.4624744	99.62	-0.4210459	99.62	-0.3946884	99.62	-0.4189508	99.62	-0.4066605	99.62	-0.3769516	99.62	-0.3913616
99.8	-0.4631529	99.8	-0.5166413	99.8	-0.4620187	99.8	-0.4064698	99.8	-0.4667743	99.8	-0.4293701	99.8	-0.4279525	99.8	-0.4217795	99.8	-0.399175	99.8	-0.4619241	99.8	-0.42006	99.8	-0.3937464	99.8	-0.4129168	99.8	-0.4052016	99.8	-0.3744926	99.8	-0.3892491
100	-0.4644857	100	-0.5183592	100	-0.4582132	100	-0.411388	100	-0.4610202	100	-0.4209443	100	-0.4317534	100	-0.4159184	100	-0.4009103	100	-0.4629152	100	-0.4156526	100	-0.393873	100	-0.4114303	100	-0.3999326	100	-0.3782729	100	-0.3874027
100.2	-0.4606211	100.2	-0.518422	100.2	-0.4597928	100.2	-0.4066049	100.2	-0.4621229	100.2	-0.4226418	100.2	-0.4276818	100.2	-0.4156192	100.2	-0.3994688	100.2	-0.4635363	100.2	-0.4193654	100.2	-0.3931712	100.2	-0.4147767	100.2	-0.406826	100.2	-0.372159	100.2	-0.3828241
100.4	-0.4610087	100.4	-0.5153109	100.4	-0.4573242	100.4	-0.4118538	100.4	-0.4630891	100.4	-0.4224967	100.4	-0.4306121	100.4	-0.4170704	100.4	-0.3936347	100.4	-0.4607636	100.4	-0.416895	100.4	-0.392688	100.4	-0.4111452	100.4	-0.3999304	100.4	-0.3718062	100.4	-0.3849776
100.6	-0.4573662	100.6	-0.519271	100.6	-0.4557928	100.6	-0.4094005	100.6	-0.4617541	100.6	-0.4235828	100.6	-0.4281097	100.6	-0.4138301	100.6	-0.3963371	100.6	-0.4581762	100.6	-0.4192158	100.6	-0.3880437	100.6	-0.412692	100.6	-0.4056925	100.6	-0.3696551	100.6	-0.3841585
100.8	-0.4631981	100.8	-0.5120628	100.8	-0.4560153	100.8	-0.4056546	100.8	-0.4565345	100.8	-0.4221309	100.8	-0.4244388	100.8	-0.4164068	100.8	-0.3969817	100.8	-0.4563611	100.8	-0.4148025	100.8	-0.3847508	100.8	-0.412637	100.8	-0.3998002	100.8	-0.3749956	100.8	-0.3835377
101	-0.45705	101	-0.5200812	101	-0.4491024	101	-0.4094398	101	-0.4606952	101	-0.4166596	101	-0.4243	101	-0.4155014	101	-0.3947951	101	-0.4564379	101	-0.4140844	101	-0.3855963	101	-0.4091241	101	-0.3989103	101	-0.3670055	101	-0.3821928
101.2	-0.4530744	101.2	-0.5130439	101.2	-0.4518886	101.2	-0.4011347	101.2	-0.4590864	101.2	-0.4190987	101.2	-0.4254431	101.2	-0.4127125	101.2	-0.3913426	101.2	-0.4562474	101.2	-0.4107226	101.2	-0.3854043	101.2	-0.4132487	101.2	-0.396699	101.2	-0.3652559	101.2	-0.3841073
101.4	-0.4524922	101.4	-0.5118678	101.4	-0.4490841	101.4	-0.4039246	101.4	-0.4534045	101.4	-0.4162489	101.4	-0.4223515	101.4	-0.4134926	101.4	-0.396681	101.4	-0.454103	101.4	-0.4127496	101.4	-0.3829347	101.4	-0.4066771	101.4	-0.3954172	101.4	-0.3636298	101.4	-0.3792347
101.6	-0.4545165	101.6	-0.5148801	101.6	-0.4505983	101.6	-0.399647	101.6	-0.449853	101.6	-0.4166988	101.6	-0.4171566	101.6	-0.4123842	101.6	-0.3890146	101.6	-0.4537165	101.6	-0.4091877	101.6	-0.382807	101.6	-0.4115435	101.6	-0.4001007	101.6	-0.3659771	101.6	-0.3755568
101.8	-0.4536733	101.8	-0.5116417	101.8	-0.4500147	101.8	-0.3985935	101.8	-0.4578463	101.8	-0.4149755	101.8	-0.413434	101.8	-0.4043839	101.8	-0.3920329	101.8	-0.4527079	101.8	-0.4060049	101.8	-0.3784224	101.8	-0.405242	101.8	-0.3944516	101.8	-0.3632932	101.8	-0.3758315
102	-0.4525438	102	-0.5083081	102	-0.4481954	102	-0.3984731	102	-0.4521196	102	-0.414273	102	-0.4193373	102	-0.4129687	102	-0.3883731	102	-0.4558943	102	-0.4110747	102	-0.3877711	102	-0.4068657	102	-0.3916101	102	-0.3651449	102	-0.3817178
102.2	-0.451429	102.2	-0.5149417	102.2	-0.4438746	102.2	-0.3978633	102.2	-0.4497469	102.2	-0.4136484	102.2	-0.4188835	102.2	-0.4090929	102.2	-0.3886203	102.2	-0.4544048	102.2	-0.409874	102.2	-0.381797	102.2	-0.404741	102.2	-0.3964262	102.2	-0.3613981	102.2	-0.3751742
102.4	-0.4481274	102.4	-0.5095467	102.4	-0.4472874	102.4	-0.4002324	102.4	-0.4499744	102.4	-0.4128964	102.4	-0.4184878	102.4	-0.4079234	102.4	-0.3906084	102.4	-0.4543546	102.4	-0.4058121	102.4	-0.3792135	102.4	-0.3989866	102.4	-0.3995361	102.4	-0.3617569	102.4	-0.3757226
102.6	-0.4490571	102.6	-0.5066648	102.6	-0.4437524	102.6	-0.3969432	102.6	-0.4503674	102.6	-0.4128783	102.6	-0.4179736	102.6	-0.4042085	102.6	-0.3890443	102.6	-0.4490737	102.6	-0.400682	102.6	-0.3812244	102.6	-0.404075	102.6	-0.3923825	102.6	-0.3614274	102.6	-0.3762139
102.8	-0.4438539	102.8	-0.5078055	102.8	-0.443249	102.8	-0.3985274	102.8	-0.449319	102.8	-0.4138818	102.8	-0.4139624	102.8	-0.4033843	102.8	-0.3882849	102.8	-0.4477083	102.8	-0.4016993	102.8	-0.3815613	102.8	-0.3988018	102.8	-0.3918787	102.8	-0.3599062	102.8	-0.3716659
103	-0.4500792	103	-0.5077198	103	-0.4424511	103	-0.3932385	103	-0.4495162	103	-0.4096645	103	-0.4123032	103	-0.4075315	103	-0.3866111	103	-0.4411708	103	-0.4073575	103	-0.3799476	103	-0.4020855	103	-0.3920256	103	-0.3598388	103	-0.3727502
103.2	-0.4475011	103.2	-0.5058181	103.2	-0.4441788	103.2	-0.3957062	103.2	-0.447284	103.2	-0.4082105	103.2	-0.4151151	103.2	-0.4079435	103.2	-0.3834105	103.2	-0.4527275	103.2	-0.4036924	103.2	-0.3743723	103.2	-0.4003366	103.2	-0.3919161	103.2	-0.356692	103.2	-0.373629
103.4	-0.4451546	103.4	-0.5019918	103.4	-0.4412467	103.4	-0.3877566	103.4	-0.4478912	103.4	-0.4065019	103.4	-0.4164493	103.4	-0.4053981	103.4	-0.3853728	103.4	-0.4479581	103.4	-0.4048887	103.4	-0.3728858	103.4	-0.4005044	103.4	-0.3926902	103.4	-0.36015	103.4	-0.3682159
103.6	-0.4472903	103.6	-0.5005357	103.6	-0.4421766	103.6	-0.3926047	103.6	-0.4469714	103.6	-0.409697	103.6	-0.4095033	103.6	-0.4025097	103.6	-0.3838249	103.6	-0.4422639	103.6	-0.4029227	103.6	-0.3759288	103.6	-0.3971211	103.6	-0.3915027	103.6	-0.358039	103.6	-0.3715765
103.8	-0.4409848	103.8	-0.4999563	103.8	-0.4358333	103.8	-0.3936368	103.8	-0.4443994	103.8	-0.4044612	103.8	-0.405496	103.8	-0.4043939	103.8	-0.3814564	103.8	-0.4463143	103.8	-0.4026293	103.8	-0.3719346	103.8	-0.3975632	103.8	-0.3858116	103.8	-0.3591454	103.8	-0.3716236
104	-0.4415983	104	-0.5044212	104	-0.4357368	104	-0.3937695	104	-0.4417501	104	-0.4054093	104	-0.4092515	104	-0.3979501	104	-0.3837071	104	-0.4447355	104	-0.3970897	104	-0.3697558	104	-0.3979871	104	-0.3905456	104	-0.3493409	104	-0.3704204
104.2	-0.4403492	104.2	-0.5013478	104.2	-0.4432819	104.2	-0.3867738	104.2	-0.4393226	104.2	-0.4052557	104.2	-0.4049899	104.2	-0.4001419	104.2	-0.3842089	104.2	-0.446683	104.2	-0.3979235	104.2	-0.3701087	104.2	-0.393651	104.2	-0.3905129	104.2	-0.3538275	104.2	-0.3696046
104.4	-0.4375744	104.4	-0.4987231	104.4	-0.4341568	104.4	-0.3855713	104.4	-0.4416666	104.4	-0.4022195	104.4	-0.4117699	104.4	-0.3980374	104.4	-0.3786055	104.4	-0.4409528	104.4	-0.3970403	104.4	-0.3733896	104.4	-0.3948331	104.4	-0.3816667	104.4	-0.352604	104.4	-0.3680752
104.6	-0.4392782	104.6	-0.4981911	104.6	-0.4358007	104.6	-0.3866993	104.6	-0.4405769	104.6	-0.4006039	104.6	-0.4030203	104.6	-0.3975812	104.6	-0.3783116	104.6	-0.4405202	104.6	-0.396822	104.6	-0.3711324	104.6	-0.3933932	104.6	-0.382455	104.6	-0.3535768	104.6	-0.3651882
104.81	-0.4438785	104.81	-0.4957342	104.81	-0.4367053	104.81	-0.3911333	104.81	-0.438858	104.81	-0.4024454	104.81	-0.4030182	104.81	-0.3948649	104.8	-0.3800487	104.8	-0.441534	104.8	-0.3982632	104.8	-0.3760531	104.8	-0.3906269	104.8	-0.3828797	104.8	-0.3522866	104.8	-0.3671445
105	-0.4365715	105	-0.4910724	105	-0.4317022	105	-0.3881137	105	-0.4395854	105	-0.4024999	105	-0.4068094	105	-0.3971559	105	-0.3779737	105	-0.4376951	105	-0.3915906	105	-0.3737149	105	-0.3919511	105	-0.3810203	105	-0.3508306	105	-0.3668765
105.2	-0.4385524	105.2	-0.4987971	105.2	-0.4315942	105.2	-0.3872274	105.2	-0.43984	105.2	-0.398541	105.2	-0.4088303	105.2	-0.3923429	105.2	-0.3779635	105.2	-0.4418178	105.2	-0.3978006	105.2	-0.366421	105.2	-0.3896521	105.2	-0.383328	105.2	-0.3507938	105.2	-0.3590939
105.4	-0.4344646	105.4	-0.4960152	105.4	-0.4328066	105.4	-0.3813733	105.4	-0.4379506	105.4	-0.3996832	105.4	-0.4005496	105.4	-0.3943368	105.4	-0.3739226	105.4	-0.4408648	105.4	-0.3966415	105.4	-0.3679956	105.4	-0.391304	105.4	-0.3828196	105.4	-0.3453653	105.4	-0.3600751
105.6	-0.4351139	105.6	-0.4930273	105.6	-0.4342341	105.6	-0.384506	105.6	-0.4324836	105.6	-0.3996619	105.6	-0.3987776	105.6	-0.3920495	105.6	-0.374045	105.6	-0.4346402	105.6	-0.3917976	105.6	-0.370375	105.6	-0.390395	105.6	-0.3806935	105.6	-0.3461577	105.6	-0.3627096
105.8	-0.438407	105.8	-0.4903644	105.8	-0.4324366	105.8	-0.3822972	105.8	-0.4365506	105.8	-0.3975846	105.8	-0.4018208	105.8	-0.3948126	105.81	-0.3719127	105.81	-0.4328215	105.81	-0.3905198	105.81	-0.3701253	105.81	-0.3906515	105.81	-0.3779997	105.81	-0.3476184	105.81	-0.3616174
106	-0.4356727	106	-0.4871852	106	-0.4296564	106	-0.3797721	106	-0.4372658	106	-0.3985327	106	-0.3970992	106	-0.3918263	106	-0.3717371	106	-0.4337848	106	-0.3896488	106	-0.3632874	106	-0.3864974	106	-0.3756476	106	-0.3431152	106	-0.3610885
106.2	-0.4304975	106.2	-0.4886045	106.2	-0.429188	106.2	-0.3786834	106.2	-0.43115	106.2	-0.3938808	106.2	-0.4023666	106.2	-0.3896354	106.2	-0.3722565	106.2	-0.4382968	106.2	-0.3909254	106.2	-0.3647476	106.2	-0.3878263	106.2	-0.3776798	106.2	-0.3448238	106.2	-0.3584085
106.4	-0.4311911	106.4	-0.4937938	106.4	-0.4243856	106.4	-0.3767006	106.4	-0.4278421	106.4	-0.3963511	106.4	-0.3998998	106.4	-0.3908595	106.4	-0.3721921	106.4	-0.4349108	106.4	-0.3888556	106.4	-0.3646733	106.4	-0.3858751	106.4	-0.3740948	106.4	-0.3435313	106.4	-0.3568096
106.6	-0.4325308	106.6	-0.4933169	106.6	-0.4284419	106.6	-0.3772529	106.6	-0.4287837	106.6	-0.3920684	106.6	-0.3981812	106.6	-0.3900026	106.6	-0.3685391	106.6	-0.4301002	106.6	-0.38421	106.6	-0.3623855	106.6	-0.3876758	106.6	-0.3780056	106.6	-0.3453107	106.6	-0.3613966
106.8	-0.4277537	106.8	-0.4904128	106.8	-0.4268174	106.8	-0.379501	106.8	-0.4327142	106.8	-0.3976541	106.8	-0.3954801	106.8	-0.3911089	106.8	-0.3664573	106.8	-0.4339969	106.8	-0.3893514	106.8	-0.3636838	106.8	-0.3909099	106.8	-0.3756448	106.8	-0.3436255	106.8	-0.3617795
107	-0.4329025	107	-0.4860143	107	-0.4234172	107	-0.3757233	107	-0.4312885	107	-0.3942767	107	-0.400342	107	-0.3831723	107	-0.3674591	107	-0.428556	107	-0.3872659	107	-0.3632641	107	-0.3813079	107	-0.3796268	107	-0.3420326	107	-0.3576926
107.2	-0.4263315	107.2	-0.4885583	107.2	-0.4256544	107.2	-0.3763517	107.2	-0.4289401	107.2	-0.3932889	107.2	-0.3955908	107.2	-0.3891205	107.2	-0.3683933	107.2	-0.4290859	107.2	-0.3831668	107.2	-0.3590052	107.2	-0.3849593	107.2	-0.3735746	107.2	-0.3405556	107.2	-0.3516219
107.4	-0.432162	107.4	-0.487946	107.4	-0.4226483	107.4	-0.3760051	107.4	-0.4257848	107.4	-0.3908656	107.4	-0.397001	107.4	-0.3888786	107.4	-0.3681428	107.4	-0.4317862	107.4	-0.388171	107.4	-0.3614076	107.4	-0.3852068	107.4	-0.3770064	107.4	-0.3399599	107.4	-0.3553802
107.6	-0.4310099	107.6	-0.4865976	107.6	-0.4235332	107.6	-0.3742376	107.6	-0.4246082	107.6	-0.3886282	107.6	-0.3954449	107.6	-0.3825287	107.6	-0.3679361	107.6	-0.4298225	107.6	-0.3833229	107.6	-0.3560807	107.6	-0.3858323	107.6	-0.3717621	107.6	-0.3419908	107.6	-0.3494252
107.8	-0.428663	107.8	-0.4842095	107.8	-0.4275391	107.8	-0.3718369	107.8	-0.4255972	107.8	-0.3908531	107.8	-0.398925	107.8	-0.3857371	107.8	-0.3687019	107.8	-0.4275557	107.8	-0.3883757	107.8	-0.3597472	107.8	-0.3838063	107.8	-0.3702256	107.8	-0.3367991	107.8	-0.3540643
108	-0.4262839	108	-0.4797618	108	-0.4237024	108	-0.3737057	108	-0.430308	108	-0.3887781	108	-0.393451	108	-0.3856045	108	-0.366716	108	-0.4290104	108	-0.3831479	108	-0.3608668	108	-0.3822429	108	-0.3700757	108	-0.3365361	108	-0.354397
108.22	-0.4281717	108.22	-0.4820589	108.22	-0.4231448	108.22	-0.373881	108.22	-0.4244334	108.22	-0.3874729	108.22	-0.3909864	108.22	-0.3801698	108.2	-0.3670383	108.2	-0.4272578	108.2	-0.3843072	108.2	-0.3569482	108.2	-0.3824839	108.2	-0.3698423	108.2	-0.3328261	108.2	-0.3521452
108.4	-0.4279448	108.4	-0.4833371	108.4	-0.4190236	108.4	-0.3729147	108.4	-0.4226012	108.4	-0.3881668	108.4	-0.3888246	108.4	-0.3840621	108.4	-0.3623155	108.4	-0.4265724	108.4	-0.3827488	108.4	-0.361843	108.4	-0.3777231	108.4	-0.3683158	108.4	-0.3397467	108.4	-0.3519252
108.6	-0.4232603	108.6	-0.4817698	108.6	-0.4171688	108.6	-0.3730703	108.6	-0.4234559	108.6	-0.3875452	108.6	-0.3927433	108.6	-0.384389	108.6	-0.3634319	108.6	-0.4287871	108.6	-0.3865085	108.6	-0.3548588	108.6	-0.3792638	108.6	-0.3693044	108.6	-0.3394469	108.6	-0.3513618
108.8	-0.4208917	108.8	-0.4823124	108.8	-0.4203532	108.8	-0.3665161	108.8	-0.4247139	108.8	-0.3824456	108.8	-0.3878433	108.8	-0.3803232	108.8	-0.3639597	108.8	-0.4259864	108.8	-0.3798711	108.8	-0.361914	108.8	-0.378485	108.8	-0.3725789	108.8	-0.3363803	108.8	-0.3530827
109	-0.4238035	109	-0.4789536	109	-0.4182737	109	-0.3732281	109	-0.4267426	109	-0.3853286	109	-0.3868097	109	-0.3825519	109	-0.3599379	109	-0.4246791	109	-0.3790387	109	-0.3592654	109	-0.3776808	109	-0.3712797	109	-0.3355613	109	-0.3471655
109.21	-0.4278941	109.21	-0.4816415	109.21	-0.4160087	109.21	-0.3681333	109.21	-0.4198079	109.21	-0.3862743	109.21	-0.3881946	109.21	-0.380566	109.2	-0.3547603	109.2	-0.4239726	109.2	-0.3796493	109.2	-0.3559907	109.2	-0.375248	109.2	-0.3677357	109.2	-0.3319238	109.2	-0.3495305
109.4	-0.4245028	109.4	-0.4826143	109.4	-0.4135607	109.4	-0.36854	109.4	-0.4172063	109.4	-0.3862338	109.4	-0.3870163	109.4	-0.3762016	109.4	-0.359941	109.4	-0.4244284	109.4	-0.378196	109.4	-0.3553579	109.4	-0.3726989	109.4	-0.3664328	109.4	-0.3309825	109.4	-0.3497347
109.6	-0.4251657	109.6	-0.4817104	109.6	-0.4142972	109.6	-0.3667688	109.6	-0.4247125	109.6	-0.3805249	109.6	-0.3882713	109.6	-0.3799457	109.6	-0.3582424	109.6	-0.420237	109.6	-0.3784242	109.6	-0.3558416	109.6	-0.3787686	109.6	-0.3665364	109.6	-0.3330676	109.6	-0.348128
109.8	-0.4265901	109.8	-0.4753548	109.8	-0.4142748	109.8	-0.3723632	109.8	-0.4226216	109.8	-0.3858071	109.8	-0.3827308	109.8	-0.3820997	109.8	-0.3615076	109.8	-0.4204966	109.8	-0.3765287	109.8	-0.3538056	109.8	-0.3729395	109.8	-0.3628981	109.8	-0.336266	109.8	-0.3452965
110	-0.419395	110	-0.4779615	110	-0.4103792	110	-0.3678158	110	-0.4195848	110	-0.3851985	110	-0.3839823	110	-0.3747583	110	-0.3542592	110	-0.4173516	110	-0.3773482	110	-0.3482204	110	-0.3715877	110	-0.3637741	110	-0.337281	110	-0.3479433
110.2	-0.4207881	110.2	-0.4746036	110.2	-0.4110676	110.2	-0.3658601	110.2	-0.4191169	110.2	-0.3774906	110.2	-0.3854466	110.2	-0.3776182	110.2	-0.3593652	110.2	-0.4206123	110.2	-0.3747783	110.2	-0.3512875	110.2	-0.3679093	110.2	-0.3693714	110.2	-0.3290181	110.2	-0.343077
110.4	-0.4165804	110.4	-0.4780166	110.4	-0.4152371	110.4	-0.3649776	110.4	-0.4122502	110.4	-0.3787489	110.4	-0.382607	110.4	-0.3771811	110.4	-0.3564816	110.4	-0.4190356	110.4	-0.3718647	110.4	-0.3508869	110.4	-0.3748535	110.4	-0.3578259	110.4	-0.3321241	110.4	-0.3418674
110.6	-0.42206	110.6	-0.47518	110.6	-0.4089877	110.6	-0.3689893	110.6	-0.4193538	110.6	-0.3824173	110.6	-0.3813849	110.6	-0.3748535	110.6	-0.3525094	110.6	-0.4184001	110.6	-0.3725041	110.6	-0.3473096	110.6	-0.3756873	110.6	-0.3613922	110.6	-0.3305416	110.6	-0.3443126
110.81	-0.4173967	110.81	-0.4772095	110.81	-0.4102706	110.81	-0.3670529	110.81	-0.4162136	110.81	-0.3803857	110.81	-0.3821994	110.81	-0.3753349	110.8	-0.3562179	110.8	-0.4216412	110.8	-0.3785047	110.8	-0.351925	110.8	-0.3722046	110.8	-0.3623169	110.8	-0.3317765	110.8	-0.3413594
111	-0.4183278	111	-0.4762622	111	-0.4136237	111	-0.3636526	111	-0.4134452	111	-0.3748374	111	-0.3827556	111	-0.3745416	111	-0.356608	111	-0.4178205	111	-0.3735683	111	-0.3476004	111	-0.3649706	111	-0.3579361	111	-0.3281036	111	-0.3416134
111.2	-0.4199442	111.2	-0.4701301	111.2	-0.4083534	111.2	-0.3644877	111.2	-0.414266	111.2	-0.3768813	111.2	-0.3839309	111.2	-0.3721173	111.2	-0.3548828	111.2	-0.4160654	111.2	-0.3754713	111.2	-0.3524206	111.2	-0.3704373	111.2	-0.3634157	111.2	-0.3252923	111.2	-0.3392953
111.4	-0.4150971	111.4	-0.4751153	111.4	-0.4096306	111.4	-0.3595659	111.4	-0.4136032	111.4	-0.3776475	111.4	-0.3800167	111.4	-0.3730841	111.4	-0.3537786	111.4	-0.419991	111.4	-0.3733905	111.4	-0.3482423	111.4	-0.3685402	111.4	-0.3589283	111.4	-0.3251213	111.4	-0.3410342
111.6	-0.417917	111.6	-0.4718313	111.6	-0.4076491	111.6	-0.3622182	111.6	-0.4171509	111.6	-0.3736058	111.6	-0.3836391	111.6	-0.3696494	111.6	-0.3538001	111.6	-0.4132842	111.6	-0.3707615	111.6	-0.3460159	111.6	-0.3666236	111.6	-0.3583591	111.6	-0.3302704	111.6	-0.3436888
111.8	-0.4152479	111.8	-0.4743266	111.8	-0.4068047	111.8	-0.3597526	111.8	-0.4145865	111.8	-0.372445	111.8	-0.3775079	111.8	-0.3700989	111.8	-0.3521871	111.8	-0.4168144	111.8	-0.3693776	111.8	-0.3496706	111.8	-0.3673741	111.8	-0.3581201	111.8	-0.3248572	111.8	-0.3430749
112	-0.4109778	112	-0.4694034	112	-0.4087653	112	-0.3650642	112	-0.4098872	112	-0.3723211	112	-0.3781525	112	-0.3635834	112	-0.3539976	112	-0.4149209	112	-0.3734807	112	-0.3479469	112	-0.3666252	112	-0.3608707	112	-0.3229798	112	-0.3381753
112.2	-0.4132248	112.2	-0.4762441	112.2	-0.4039698	112.2	-0.3572733	112.2	-0.408615	112.2	-0.3779028	112.2	-0.3751584	112.2	-0.3729561	112.2	-0.350662	112.2	-0.4171875	112.2	-0.3683058	112.2	-0.3506991	112.2	-0.3711966	112.2	-0.3600267	112.2	-0.3250159	112.2	-0.3419603
112.4	-0.4144594	112.4	-0.4650361	112.4	-0.4029245	112.4	-0.3565644	112.4	-0.4132882	112.4	-0.3717169	112.4	-0.3742701	112.4	-0.3686866	112.4	-0.3488155	112.4	-0.4187875	112.4	-0.3671727	112.4	-0.346226	112.4	-0.3680106	112.4	-0.356986	112.4	-0.3242907	112.4	-0.3413601
112.6	-0.4124638	112.6	-0.4704917	112.6	-0.4078994	112.6	-0.3592359	112.6	-0.4111307	112.6	-0.3733824	112.6	-0.3772661	112.6	-0.367731	112.6	-0.3460743	112.6	-0.4170989	112.6	-0.3697264	112.6	-0.3463895	112.6	-0.3649278	112.6	-0.3518876	112.6	-0.3205942	112.6	-0.3402061
112.8	-0.410091	112.8	-0.4668971	112.8	-0.4066245	112.8	-0.3615888	112.8	-0.4134093	112.8	-0.3685816	112.8	-0.3756709	112.8	-0.3706202	112.8	-0.3514178	112.8	-0.4130969	112.8	-0.3625087	112.8	-0.3421997	112.8	-0.3615233	112.8	-0.3576946	112.8	-0.3250287	112.8	-0.3383942
113	-0.4102274	113	-0.4666936	113	-0.4032563	113	-0.3603359	113	-0.4069858	113	-0.3669902	113	-0.3746168	113	-0.3736765	113	-0.348995	113	-0.4139833	113	-0.3640812	113	-0.3457217	113	-0.3617732	113	-0.3557515	113	-0.3232518	113	-0.3356152
113.2	-0.4083938	113.2	-0.4688336	113.2	-0.4017889	113.2	-0.3578425	113.2	-0.4043677	113.2	-0.3717562	113.2	-0.3735541	113.2	-0.3711624	113.2	-0.3487621	113.2	-0.4093684	113.2	-0.3669494	113.2	-0.34381	113.2	-0.3613867	113.2	-0.3547806	113.2	-0.3227344	113.2	-0.3374128
113.41	-0.4135449	113.41	-0.4678411	113.41	-0.4056695	113.41	-0.3553311	113.41	-0.4075861	113.41	-0.3714415	113.41	-0.3805012	113.41	-0.3672076	113.4	-0.3489503	113.4	-0.4105977	113.4	-0.3646874	113.4	-0.3436181	113.4	-0.3641258	113.4	-0.3525648	113.4	-0.3221211	113.4	-0.3355512
113.6	-0.407873	113.6	-0.4654644	113.6	-0.4008245	113.6	-0.359742	113.6	-0.4096133	113.6	-0.370828	113.6	-0.3742402	113.6	-0.3663774	113.6	-0.3506153	113.6	-0.4084395	113.6	-0.3678921	113.6	-0.3427649	113.6	-0.3597673	113.6	-0.3542366	113.6	-0.317047	113.6	-0.3367963
113.8	-0.4086185	113.8	-0.4656637	113.8	-0.3983209	113.8	-0.3525135	113.8	-0.4056091	113.8	-0.3678309	113.8	-0.3729743	113.8	-0.3666261	113.8	-0.3465763	113.8	-0.40827	113.8	-0.3661964	113.8	-0.3425028	113.8	-0.3599252	113.8	-0.3534024	113.8	-0.3193161	113.8	-0.3349231
114	-0.410676	114	-0.4655491	114	-0.4002709	114	-0.3543025	114	-0.4037769	114	-0.3671067	114	-0.3756748	114	-0.3679985	114	-0.3457954	114	-0.4076226	114	-0.3696392	114	-0.3431633	114	-0.3655099	114	-0.3501004	114	-0.315874	114	-0.3332405
114.2	-0.4057627	114.2	-0.4564707	114.2	-0.4001672	114.2	-0.3544387	114.2	-0.4003212	114.2	-0.3677725	114.2	-0.373777	114.2	-0.3643087	114.2	-0.347044	114.2	-0.41052	114.2	-0.364643	114.2	-0.3421571	114.2	-0.3652404	114.2	-0.3504667	114.2	-0.3169023	114.2	-0.3329556
114.4	-0.4042582	114.4	-0.4630737	114.4	-0.4032981	114.4	-0.3520443	114.4	-0.4059918	114.4	-0.3648956	114.4	-0.3686879	114.4	-0.3638768	114.4	-0.3434439	114.4	-0.407462	114.4	-0.3615757	114.4	-0.3387564	114.4	-0.3632622	114.4	-0.3538119	114.4	-0.315722	114.4	-0.3352697
114.6	-0.4016162	114.6	-0.4694055	114.6	-0.3974003	114.6	-0.352194	114.6	-0.4062719	114.6	-0.3628131	114.6	-0.3672345	114.6	-0.3579148	114.6	-0.3424247	114.6	-0.4063287	114.6	-0.3650255	114.6	-0.3394302	114.6	-0.3601309	114.6	-0.353129	114.6	-0.3162191	114.6	-0.3348237
114.8	-0.4053015	114.8	-0.4601244	114.8	-0.3962832	114.8	-0.3525223	114.8	-0.401734	114.8	-0.3613935	114.8	-0.3693838	114.8	-0.3645486	114.8	-0.3406892	114.8	-0.4060667	114.8	-0.3583497	114.8	-0.3434319	114.8	-0.3569884	114.8	-0.3486695	114.8	-0.3157861	114.8	-0.3326983
115	-0.4079064	115	-0.4608037	115	-0.3960004	115	-0.352261	115	-0.3996926	115	-0.3683103	115	-0.3672902	115	-0.3602567	115	-0.3420418	115	-0.4046929	115	-0.3587264	115	-0.3390124	115	-0.3568108	115	-0.3514426	115	-0.3153158	115	-0.3311976
115.2	-0.4055707	115.2	-0.4613182	115.2	-0.400461	115.2	-0.3496386	115.2	-0.404707	115.2	-0.3685575	115.2	-0.3717102	115.2	-0.35898	115.2	-0.3468086	115.2	-0.4058149	115.2	-0.3631421	115.2	-0.3398991	115.2	-0.3594615	115.2	-0.347042	115.2	-0.3183384	115.2	-0.3284454
115.4	-0.4022972	115.4	-0.4588596	115.4	-0.3950623	115.4	-0.3480172	115.4	-0.3998461	115.4	-0.3655464	115.4	-0.3684159	115.4	-0.3588903	115.4	-0.3453661	115.4	-0.3999501	115.4	-0.3624161	115.4	-0.3377792	115.4	-0.3561441	115.4	-0.3485225	115.4	-0.312807	115.4	-0.334965
115.6	-0.4030228	115.6	-0.4606377	115.6	-0.397464	115.6	-0.3489383	115.6	-0.4048782	115.6	-0.3650893	115.6	-0.3687848	115.6	-0.3601261	115.6	-0.335918	115.6	-0.4028545	115.6	-0.3613805	115.6	-0.3344877	115.6	-0.3560202	115.6	-0.3468966	115.6	-0.3136834	115.6	-0.3300301
115.8	-0.4005721	115.8	-0.4557193	115.8	-0.3952646	115.8	-0.3505714	115.8	-0.4029033	115.8	-0.3617884	115.8	-0.3686479	115.8	-0.3572371	115.8	-0.3401042	115.8	-0.4026357	115.8	-0.3574249	115.8	-0.336034	115.8	-0.3520015	115.8	-0.3493589	115.8	-0.3135517	115.8	-0.3335117
116	-0.4014284	116	-0.4580099	116	-0.3932422	116	-0.3530093	116	-0.400245	116	-0.3648165	116	-0.3644886	116	-0.3592031	116	-0.3400309	116	-0.4022211	116	-0.3559243	116	-0.337439	116	-0.3537453	116	-0.3501021	116	-0.3117449	116	-0.3301556
116.2	-0.4028678	116.2	-0.4568923	116.2	-0.3973345	116.2	-0.3525453	116.2	-0.3962835	116.2	-0.3611615	116.2	-0.3699952	116.2	-0.3597451	116.2	-0.3360093	116.2	-0.4080696	116.2	-0.356604	116.2	-0.3374219	116.2	-0.3537683	116.2	-0.3448175	116.2	-0.3083057	116.2	-0.3283407
116.4	-0.4045675	116.4	-0.4590169	116.4	-0.3931507	116.4	-0.34668	116.4	-0.3949552	116.4	-0.3589291	116.4	-0.3669046	116.4	-0.3613025	116.4	-0.340723	116.4	-0.4056266	116.4	-0.3570472	116.4	-0.3382697	116.4	-0.353835	116.4	-0.3468731	116.4	-0.313587	116.4	-0.3272951
116.6	-0.3973254	116.6	-0.4570161	116.6	-0.3950341	116.6	-0.348633	116.6	-0.3997012	116.6	-0.3568693	116.6	-0.3663154	116.6	-0.3511175	116.6	-0.3385649	116.6	-0.399374	116.6	-0.3552708	116.6	-0.3379711	116.6	-0.3557802	116.6	-0.3444784	116.6	-0.3102028	116.6	-0.3269057
116.8	-0.4036219	116.8	-0.4565264	116.8	-0.3920611	116.8	-0.347526	116.8	-0.3960945	116.8	-0.362293	116.8	-0.3597665	116.8	-0.3589582	116.8	-0.338708	116.8	-0.3985011	116.8	-0.3571009	116.8	-0.3293521	116.8	-0.3526763	116.8	-0.3448686	116.8	-0.3110586	116.8	-0.3238287
117	-0.4004413	117	-0.4561305	117	-0.3959259	117	-0.3472711	117	-0.3974765	117	-0.3624465	117	-0.3632496	117	-0.3545647	117	-0.3356314	117	-0.4003371	117	-0.3519337	117	-0.3302451	117	-0.3513414	117	-0.3463314	117	-0.3120311	117	-0.3225938
117.2	-0.3983652	117.2	-0.4552653	117.2	-0.3953905	117.2	-0.3472772	117.2	-0.3942656	117.2	-0.3563602	117.2	-0.3643973	117.2	-0.3557028	117.2	-0.3354789	117.2	-0.3976189	117.2	-0.3516249	117.2	-0.3346314	117.2	-0.3524512	117.2	-0.3453399	117.2	-0.3063513	117.2	-0.3251929
117.4	-0.4002243	117.4	-0.4590996	117.4	-0.3912007	117.4	-0.35006	117.4	-0.3920112	117.4	-0.3553658	117.4	-0.363467	117.4	-0.3557839	117.4	-0.3370765	117.4	-0.4002961	117.4	-0.3533356	117.4	-0.3248111	117.4	-0.3500558	117.4	-0.3374428	117.4	-0.3081841	117.4	-0.3220273
117.6	-0.3975459	117.6	-0.4533755	117.6	-0.3879597	117.6	-0.3432641	117.6	-0.3991697	117.6	-0.3575065	117.6	-0.3592732	117.6	-0.3539228	117.6	-0.3342075	117.6	-0.3999558	117.6	-0.3581745	117.6	-0.3331305	117.6	-0.3525084	117.6	-0.3494083	117.6	-0.3112234	117.6	-0.324448
117.8	-0.3977109	117.8	-0.4556635	117.8	-0.3881893	117.8	-0.3408705	117.8	-0.3963371	117.8	-0.3570572	117.8	-0.3604104	117.8	-0.3520349	117.8	-0.3367648	117.8	-0.3976426	117.8	-0.351357	117.8	-0.3314467	117.8	-0.3460474	117.8	-0.3428155	117.8	-0.309312	117.8	-0.3256663
118	-0.3962099	118	-0.4530392	118	-0.3911529	118	-0.3406008	118	-0.3931228	118	-0.3563492	118	-0.3580908	118	-0.351392	118	-0.3353079	118	-0.3980894	118	-0.3514013	118	-0.330088	118	-0.3513974	118	-0.3419699	118	-0.3086492	118	-0.3282115
118.2	-0.3961834	118.2	-0.452253	118.2	-0.3862123	118.2	-0.3374101	118.2	-0.3925699	118.2	-0.355288	118.2	-0.3602195	118.2	-0.3558937	118.2	-0.3346644	118.2	-0.3978294	118.2	-0.3527213	118.2	-0.3307415	118.2	-0.3447877	118.2	-0.3370326	118.2	-0.3038713	118.2	-0.3265352
118.4	-0.3993201	118.4	-0.4542795	118.4	-0.3927154	118.4	-0.339174	118.4	-0.3947698	118.4	-0.3583093	118.4	-0.3603901	118.4	-0.3548518	118.4	-0.3305159	118.4	-0.3994435	118.4	-0.3518956	118.4	-0.3302733	118.4	-0.3475509	118.4	-0.3399397	118.4	-0.3106282	118.4	-0.3262391
118.6	-0.3951806	118.6	-0.4498498	118.6	-0.3863467	118.6	-0.3422726	118.6	-0.3891664	118.6	-0.355865	118.6	-0.3610858	118.6	-0.3563534	118.6	-0.3343399	118.6	-0.3954685	118.6	-0.3516128	118.6	-0.3269242	118.6	-0.3428324	118.6	-0.3381483	118.6	-0.3078575	118.6	-0.3212295
118.8	-0.3941644	118.8	-0.44902	118.8	-0.3877209	118.8	-0.3387278	118.8	-0.3900509	118.8	-0.3522644	118.8	-0.3600068	118.8	-0.3501515	118.8	-0.3332921	118.8	-0.3960168	118.8	-0.3554291	118.8	-0.3274992	118.8	-0.3443549	118.8	-0.3368295	118.8	-0.296702	118.8	-0.3198729
119	-0.3948142	119	-0.4469019	119	-0.3855526	119	-0.3422519	119	-0.3920313	119	-0.3562776	119	-0.3598961	119	-0.3495782	119	-0.332332	119	-0.3912484	119	-0.3549903	119	-0.3285178	119	-0.3483228	119	-0.3357388	119	-0.3033884	119	-0.3259762
119.2	-0.3964475	119.2	-0.451515	119.2	-0.3855909	119.2	-0.3402147	119.2	-0.392359	119.2	-0.3513156	119.2	-0.355768	119.2	-0.3517908	119.2	-0.3321271	119.2	-0.3915963	119.2	-0.3493818	119.2	-0.3275764	119.2	-0.3440519	119.2	-0.3374052	119.2	-0.3036957	119.2	-0.3226379
119.4	-0.3937476	119.4	-0.4460829	119.4	-0.3866839	119.4	-0.3382276	119.4	-0.388423	119.4	-0.3588648	119.4	-0.3581483	119.4	-0.3527869	119.4	-0.3335608	119.4	-0.3967679	119.4	-0.3508573	119.4	-0.3262465	119.4	-0.346139	119.4	-0.3377352	119.4	-0.3010303	119.4	-0.3212668
119.6	-0.3987325	119.6	-0.4499773	119.6	-0.3860325	119.6	-0.3357506	119.6	-0.3874668	119.6	-0.351113	119.6	-0.3565156	119.6	-0.3539346	119.6	-0.3292195	119.6	-0.3929979	119.6	-0.343713	119.6	-0.3292833	119.6	-0.3430427	119.6	-0.3365758	119.6	-0.3028397	119.6	-0.3179435
119.8	-0.3913742	119.8	-0.447852	119.8	-0.3815905	119.8	-0.3353904	119.8	-0.3879942	119.8	-0.3555887	119.8	-0.3602392	119.8	-0.3498947	119.8	-0.329161	119.8	-0.3941714	119.8	-0.3519627	119.8	-0.3236131	119.8	-0.3432854	119.8	-0.334788	119.8	-0.2970412	119.8	-0.3189862
120	-0.3927284	120	-0.4483927	120	-0.3797209	120	-0.3411028	120	-0.3857491	120	-0.3542095	120	-0.3532971	120	-0.3474941	120	-0.3279661	120	-0.3885185	120	-0.3498734	120	-0.327581	120	-0.342889	120	-0.3300538	120	-0.2993199	120	-0.3161145
120.2	-0.391456	120.2	-0.4471404	120.2	-0.3838997	120.2	-0.3406172	120.2	-0.3900889	120.2	-0.3499294	120.2	-0.3551981	120.2	-0.3445056	120.2	-0.3327815	120.2	-0.3926424	120.2	-0.3483031	120.2	-0.3282316	120.2	-0.3448105	120.2	-0.3350522	120.2	-0.2970593	120.2	-0.3182299
120.41	-0.391541	120.41	-0.4463579	120.41	-0.3825618	120.41	-0.3387467	120.41	-0.3869953	120.41	-0.3507913	120.41	-0.352753	120.41	-0.3467269	120.4	-0.332504	120.4	-0.3854273	120.4	-0.3474422	120.4	-0.3242204	120.4	-0.3430863	120.4	-0.3350133	120.4	-0.2954848	120.4	-0.3167382
120.6	-0.386379	120.6	-0.4457524	120.6	-0.3786646	120.6	-0.3341078	120.6	-0.3875325	120.6	-0.348783	120.6	-0.354461	120.6	-0.3455184	120.6	-0.3295727	120.6	-0.3948934	120.6	-0.3436498	120.6	-0.3238004	120.6	-0.342606	120.6	-0.3344438	120.6	-0.2988191	120.6	-0.3178773
120.8	-0.386535	120.8	-0.4453201	120.8	-0.3831736	120.8	-0.3364513	120.8	-0.3884235	120.8	-0.3513476	120.8	-0.3509749	120.8	-0.3460828	120.8	-0.3264182	120.8	-0.3911875	120.8	-0.3460131	120.8	-0.3240236	120.8	-0.3420729	120.8	-0.3290051	120.8	-0.2992214	120.8	-0.3143045
121	-0.3896877	121	-0.4469372	121	-0.3822581	121	-0.3326809	121	-0.389063	121	-0.350209	121	-0.3524517	121	-0.3455454	121	-0.3236208	121	-0.3913564	121	-0.3416218	121	-0.3265965	121	-0.3425331	121	-0.3345141	121	-0.2941125	121	-0.3140526
121.2	-0.3893804	121.2	-0.4463635	121.2	-0.3820186	121.2	-0.3365165	121.2	-0.3907575	121.2	-0.3513168	121.2	-0.3532552	121.2	-0.3415579	121.2	-0.3249478	121.2	-0.3892985	121.2	-0.3431434	121.2	-0.3182807	121.2	-0.3374318	121.2	-0.333009	121.2	-0.3001659	121.2	-0.3163774
121.4	-0.3866605	121.4	-0.4441294	121.4	-0.3811293	121.4	-0.3393539	121.4	-0.3838946	121.4	-0.3483242	121.4	-0.3583512	121.4	-0.341443	121.4	-0.3241775	121.4	-0.3908468	121.4	-0.3468118	121.4	-0.3214049	121.4	-0.3398101	121.4	-0.3312362	121.4	-0.2963276	121.4	-0.3164732
121.6	-0.3875005	121.6	-0.4433416	121.6	-0.3787868	121.6	-0.334115	121.6	-0.3820674	121.6	-0.346582	121.6	-0.3510098	121.6	-0.340796	121.6	-0.32923	121.6	-0.3936752	121.6	-0.3416544	121.6	-0.3230254	121.6	-0.3384652	121.6	-0.3317677	121.6	-0.2988521	121.6	-0.3154876
121.8	-0.3872383	121.8	-0.4460433	121.8	-0.3796494	121.8	-0.3358881	121.8	-0.381456	121.8	-0.3468931	121.8	-0.3506844	121.8	-0.3433711	121.8	-0.3271839	121.8	-0.3874776	121.8	-0.345696	121.8	-0.3202656	121.8	-0.3397279	121.8	-0.3322955	121.8	-0.2970745	121.8	-0.3136857
122	-0.3878466	122	-0.4402111	122	-0.3794699	122	-0.3315521	122	-0.3869677	122	-0.3489886	122	-0.3527247	122	-0.347562	122	-0.3258045	122	-0.3902321	122	-0.3404603	122	-0.323522	122	-0.337279	122	-0.3300147	122	-0.2935969	122	-0.3145196
122.2	-0.3893497	122.2	-0.441343	122.2	-0.3725882	122.2	-0.3349878	122.2	-0.3834759	122.2	-0.3444288	122.2	-0.351275	122.2	-0.3436886	122.2	-0.3227237	122.2	-0.3854145	122.2	-0.3408113	122.2	-0.3184746	122.2	-0.3372737	122.2	-0.3275117	122.2	-0.2972417	122.2	-0.3148812
122.4	-0.3832658	122.4	-0.4387064	122.4	-0.3803876	122.4	-0.3336449	122.4	-0.3840093	122.4	-0.3459152	122.4	-0.344748	122.4	-0.3425173	122.4	-0.3266126	122.4	-0.3872693	122.4	-0.3374719	122.4	-0.319782	122.4	-0.3377452	122.4	-0.3334929	122.4	-0.2938922	122.4	-0.3101383
122.6	-0.3881021	122.6	-0.4402316	122.6	-0.3762479	122.6	-0.3353287	122.6	-0.3822543	122.6	-0.3450575	122.6	-0.3523948	122.6	-0.3435342	122.6	-0.3214529	122.6	-0.3884238	122.6	-0.3382213	122.6	-0.320334	122.6	-0.339352	122.6	-0.3286468	122.6	-0.2939046	122.6	-0.3111893
122.8	-0.3858863	122.8	-0.4413747	122.8	-0.3756332	122.8	-0.3306774	122.8	-0.3839255	122.8	-0.3476079	122.8	-0.3455723	122.8	-0.3391341	122.8	-0.3230768	122.8	-0.3900513	122.8	-0.3390191	122.8	-0.3194824	122.8	-0.3367755	122.8	-0.3271644	122.8	-0.2912963	122.8	-0.3122406
123	-0.3834556	123	-0.4344293	123	-0.3804942	123	-0.3242492	123	-0.3764978	123	-0.3413585	123	-0.3485032	123	-0.3422133	123	-0.3186264	123	-0.3842647	123	-0.344859	123	-0.3191826	123	-0.3348454	123	-0.329874	123	-0.2924602	123	-0.3111481
123.2	-0.3806322	123.2	-0.4384632	123.2	-0.3768115	123.2	-0.3301933	123.2	-0.3784369	123.2	-0.3420071	123.2	-0.3473208	123.2	-0.3399031	123.2	-0.3228969	123.2	-0.3857096	123.2	-0.3394078	123.2	-0.3175874	123.2	-0.33922	123.2	-0.3295314	123.2	-0.294915	123.2	-0.308899
123.4	-0.3843081	123.4	-0.4379287	123.4	-0.376994	123.4	-0.3281442	123.4	-0.3821829	123.4	-0.3449342	123.4	-0.3455399	123.4	-0.3446326	123.4	-0.325309	123.4	-0.3822909	123.4	-0.3407584	123.4	-0.3165179	123.4	-0.3319232	123.4	-0.3252522	123.4	-0.2945968	123.4	-0.3127677
123.6	-0.3841731	123.6	-0.4376173	123.6	-0.3703395	123.6	-0.3304321	123.6	-0.3785513	123.6	-0.3449517	123.6	-0.3461683	123.6	-0.337585	123.6	-0.3214561	123.6	-0.3818879	123.6	-0.335681	123.6	-0.3173078	123.6	-0.3352194	123.6	-0.3289637	123.6	-0.2918145	123.6	-0.3143933
123.81	-0.3803985	123.81	-0.4392894	123.81	-0.3767116	123.81	-0.3267662	123.81	-0.3779519	123.81	-0.3415326	123.81	-0.3486981	123.81	-0.3347284	123.8	-0.3223211	123.8	-0.3861817	123.8	-0.3358932	123.8	-0.3198053	123.8	-0.3295408	123.8	-0.32459	123.8	-0.2906255	123.8	-0.3091689
124	-0.3853591	124	-0.4367926	124	-0.3762764	124	-0.3318168	124	-0.3799242	124	-0.3435709	124	-0.3439713	124	-0.3438584	124	-0.3223859	124	-0.3847161	124	-0.3377243	124	-0.3157202	124	-0.3322401	124	-0.3254281	124	-0.2913893	124	-0.3071544
124.2	-0.3802545	124.2	-0.4367294	124.2	-0.3706686	124.2	-0.3249548	124.2	-0.3789727	124.2	-0.337285	124.2	-0.3467343	124.2	-0.334913	124.2	-0.3206879	124.2	-0.3815373	124.2	-0.3433129	124.2	-0.3139422	124.2	-0.3351258	124.2	-0.3265004	124.2	-0.293633	124.2	-0.3080868
124.4	-0.3794504	124.4	-0.4407153	124.4	-0.3714436	124.4	-0.3318725	124.4	-0.3785525	124.4	-0.3390281	124.4	-0.3394777	124.4	-0.3354748	124.4	-0.3189066	124.4	-0.3828664	124.4	-0.3344373	124.4	-0.3160836	124.4	-0.3319972	124.4	-0.3279803	124.4	-0.2920172	124.4	-0.3064801
124.6	-0.3848499	124.6	-0.4371578	124.6	-0.3724711	124.6	-0.3220199	124.6	-0.3777297	124.6	-0.3403732	124.6	-0.3456888	124.6	-0.3384847	124.6	-0.3180026	124.6	-0.3833606	124.6	-0.3361643	124.6	-0.3144491	124.6	-0.3306733	124.6	-0.3251706	124.6	-0.2952472	124.6	-0.308746
124.8	-0.3785368	124.8	-0.4413979	124.8	-0.3713196	124.8	-0.3280282	124.8	-0.3804106	124.8	-0.3403257	124.8	-0.3466843	124.8	-0.336509	124.8	-0.3204629	124.8	-0.3771628	124.8	-0.3310929	124.8	-0.3173501	124.8	-0.3313074	124.8	-0.3252938	124.8	-0.2871464	124.8	-0.3109218
125	-0.3762595	125	-0.4352385	125	-0.3691088	125	-0.3199188	125	-0.3740124	125	-0.3400002	125	-0.3444416	125	-0.3381045	125	-0.3204082	125	-0.3798527	125	-0.3351903	125	-0.3195974	125	-0.3353366	125	-0.3245969	125	-0.2875536	125	-0.3074026
125.2	-0.3782169	125.2	-0.4342262	125.2	-0.3656778	125.2	-0.3254994	125.2	-0.3743825	125.2	-0.3352058	125.2	-0.3416048	125.2	-0.3321989	125.2	-0.3158523	125.2	-0.3839274	125.2	-0.3334018	125.2	-0.3159538	125.2	-0.3310723	125.2	-0.3264413	125.2	-0.2907004	125.2	-0.30768
125.4	-0.3777227	125.4	-0.4387929	125.4	-0.3696718	125.4	-0.3238286	125.4	-0.3723935	125.4	-0.3396858	125.4	-0.3442199	125.4	-0.3329469	125.4	-0.3149659	125.4	-0.3775024	125.4	-0.3308063	125.4	-0.3121848	125.4	-0.3278528	125.4	-0.3274082	125.4	-0.2872689	125.4	-0.3072452
125.6	-0.3770319	125.6	-0.4340602	125.6	-0.3641089	125.6	-0.3255196	125.6	-0.3740847	125.6	-0.338791	125.6	-0.341168	125.6	-0.3340376	125.6	-0.3154328	125.6	-0.3769484	125.6	-0.3355405	125.6	-0.3103507	125.6	-0.3271745	125.6	-0.3233631	125.6	-0.2872147	125.6	-0.3072304
125.8	-0.3742707	125.8	-0.4338721	125.8	-0.3684331	125.8	-0.3234262	125.8	-0.3732896	125.8	-0.3364945	125.8	-0.34067	125.8	-0.3328234	125.8	-0.3160833	125.8	-0.3789524	125.8	-0.336713	125.8	-0.311103	125.8	-0.3304795	125.8	-0.3227259	125.8	-0.2859909	125.8	-0.2991441
126	-0.3815322	126	-0.4334239	126	-0.3677686	126	-0.3209439	126	-0.373016	126	-0.3390553	126	-0.3412627	126	-0.3328033	126	-0.3168324	126	-0.3798657	126	-0.3353858	126	-0.3135145	126	-0.3265305	126	-0.3215918	126	-0.2862128	126	-0.304707
126.2	-0.3747146	126.2	-0.4336073	126.2	-0.3671753	126.2	-0.3193934	126.2	-0.3725391	126.2	-0.336878	126.2	-0.3400711	126.2	-0.334916	126.2	-0.3136555	126.2	-0.3784149	126.2	-0.3325275	126.2	-0.3090198	126.2	-0.3257421	126.2	-0.3189556	126.2	-0.2852288	126.2	-0.3004176
126.42	-0.3747942	126.42	-0.4294294	126.42	-0.3657578	126.42	-0.3239288	126.42	-0.3741007	126.42	-0.3358532	126.42	-0.3421842	126.42	-0.3333176	126.4	-0.3196727	126.4	-0.3768744	126.4	-0.3318822	126.4	-0.3114713	126.4	-0.3265361	126.4	-0.3167697	126.4	-0.2810555	126.4	-0.3065463
126.6	-0.3763746	126.6	-0.4311565	126.6	-0.3686225	126.6	-0.3210775	126.6	-0.3704768	126.6	-0.3348325	126.6	-0.3438758	126.6	-0.3304026	126.6	-0.3145755	126.6	-0.3737599	126.6	-0.3319795	126.6	-0.3127417	126.6	-0.3239749	126.6	-0.317638	126.6	-0.2858517	126.6	-0.3037089
126.8	-0.3773775	126.8	-0.4356431	126.8	-0.3709918	126.8	-0.3240598	126.8	-0.373074	126.8	-0.3347157	126.8	-0.3396428	126.8	-0.3235849	126.8	-0.3161305	126.8	-0.3739976	126.8	-0.3292809	126.8	-0.3096921	126.8	-0.3244488	126.8	-0.3177483	126.8	-0.2832326	126.8	-0.3030088
127	-0.3709562	127	-0.4248451	127	-0.3693216	127	-0.319649	127	-0.3693427	127	-0.334596	127	-0.3393105	127	-0.3326358	127	-0.3135657	127	-0.3779415	127	-0.3290893	127	-0.3111523	127	-0.3316574	127	-0.317838	127	-0.2853648	127	-0.3050126
127.2	-0.3742033	127.2	-0.4320661	127.2	-0.3652774	127.2	-0.3179129	127.2	-0.3703066	127.2	-0.333542	127.2	-0.3425325	127.2	-0.331847	127.2	-0.3130206	127.2	-0.3743905	127.2	-0.3304731	127.2	-0.3100966	127.2	-0.3275971	127.2	-0.3151339	127.2	-0.2868214	127.2	-0.3072182
127.4	-0.374083	127.4	-0.4282466	127.4	-0.3672213	127.4	-0.314431	127.4	-0.3701852	127.4	-0.3327251	127.4	-0.3370176	127.4	-0.3290282	127.42	-0.3141416	127.42	-0.3731786	127.42	-0.3251066	127.42	-0.3085847	127.42	-0.3304064	127.42	-0.3199779	127.42	-0.2855688	127.42	-0.3078825
127.6	-0.3760182	127.6	-0.4297639	127.6	-0.3641727	127.6	-0.3174615	127.6	-0.3685763	127.6	-0.3382101	127.6	-0.3398136	127.6	-0.3256317	127.6	-0.3113205	127.6	-0.377588	127.6	-0.3263876	127.6	-0.3142575	127.6	-0.3246221	127.6	-0.3183257	127.6	-0.2835854	127.6	-0.3101003
127.8	-0.3693593	127.8	-0.4307486	127.8	-0.3643791	127.8	-0.3153397	127.8	-0.375095	127.8	-0.3359945	127.8	-0.3366046	127.8	-0.3312634	127.8	-0.3142687	127.8	-0.3732742	127.8	-0.327568	127.8	-0.3061627	127.8	-0.3218362	127.8	-0.3111133	127.8	-0.2772866	127.8	-0.3078722
128	-0.3746997	128	-0.4284926	128	-0.3671257	128	-0.3177717	128	-0.3688626	128	-0.3377227	128	-0.3388418	128	-0.3256072	128	-0.3108611	128	-0.374609	128	-0.3239244	128	-0.3067002	128	-0.3210563	128	-0.3141821	128	-0.2804255	128	-0.2999345
128.2	-0.3704656	128.2	-0.4315634	128.2	-0.3624834	128.2	-0.3212623	128.2	-0.3702368	128.2	-0.3300422	128.2	-0.3371849	128.2	-0.3292389	128.2	-0.3096817	128.2	-0.377335	128.2	-0.3289779	128.2	-0.3110256	128.2	-0.3262069	128.2	-0.3160081	128.2	-0.2823618	128.2	-0.3017985
128.4	-0.3676964	128.4	-0.4284894	128.4	-0.3617814	128.4	-0.3169064	128.4	-0.3658329	128.4	-0.3330426	128.4	-0.335171	128.4	-0.3246346	128.4	-0.3099024	128.4	-0.3756014	128.4	-0.3276611	128.4	-0.3028398	128.4	-0.3245887	128.4	-0.3165123	128.4	-0.2834024	128.4	-0.3006912
128.6	-0.3697825	128.6	-0.4264584	128.6	-0.3621559	128.6	-0.3181509	128.6	-0.3623054	128.6	-0.3310173	128.6	-0.3362781	128.6	-0.3299634	128.6	-0.3064432	128.6	-0.3745488	128.6	-0.33182	128.6	-0.3087839	128.6	-0.3198812	128.6	-0.3142026	128.6	-0.2795842	128.6	-0.3002083
128.8	-0.3680038	128.8	-0.4269183	128.8	-0.3681619	128.8	-0.3151681	128.8	-0.3682902	128.8	-0.3314877	128.8	-0.3373019	128.8	-0.3251705	128.8	-0.313495	128.8	-0.3716488	128.8	-0.3243235	128.8	-0.3026207	128.8	-0.3224308	128.8	-0.3133754	128.8	-0.2836652	128.8	-0.3015862
129	-0.3646491	129	-0.427631	129	-0.3599566	129	-0.3142617	129	-0.3650201	129	-0.3284685	129	-0.3376518	129	-0.3245286	129	-0.3095712	129	-0.3715171	129	-0.328884	129	-0.3071375	129	-0.3246664	129	-0.3120142	129	-0.2800398	129	-0.3020217
129.2	-0.3681243	129.2	-0.4250269	129.2	-0.3597134	129.2	-0.3167816	129.2	-0.3667212	129.2	-0.3274652	129.2	-0.3356933	129.2	-0.3309141	129.2	-0.3076507	129.2	-0.371678	129.2	-0.3304725	129.2	-0.30497	129.2	-0.3232377	129.2	-0.314786	129.2	-0.2771663	129.2	-0.3021239
129.4	-0.3741092	129.4	-0.4259304	129.4	-0.3612378	129.4	-0.3159236	129.4	-0.3667461	129.4	-0.3284045	129.4	-0.335797	129.4	-0.325855	129.4	-0.3088096	129.4	-0.3732124	129.4	-0.3287511	129.4	-0.3047239	129.4	-0.3278873	129.4	-0.312855	129.4	-0.2789925	129.4	-0.2961279
129.6	-0.3751844	129.6	-0.4288604	129.6	-0.3640217	129.6	-0.3167227	129.6	-0.364343	129.6	-0.3303171	129.6	-0.3367046	129.6	-0.3252905	129.6	-0.3100716	129.6	-0.37065	129.6	-0.324563	129.6	-0.3060908	129.6	-0.3220733	129.6	-0.3097125	129.6	-0.2794634	129.6	-0.2973349
129.8	-0.3666965	129.8	-0.4217272	129.8	-0.3613309	129.8	-0.3131624	129.8	-0.3670963	129.8	-0.3292923	129.8	-0.3316899	129.8	-0.3275572	129.8	-0.3029679	129.8	-0.3720254	129.8	-0.3216496	129.8	-0.3025121	129.8	-0.3228857	129.8	-0.3162261	129.8	-0.2754598	129.8	-0.2954972
130	-0.3710498	130	-0.4293754	130	-0.3605573	130	-0.3188186	130	-0.3620431	130	-0.3246177	130	-0.3341235	130	-0.3255218	130	-0.3078231	130	-0.3721586	130	-0.3226071	130	-0.304043	130	-0.3165587	130	-0.3157532	130	-0.277206	130	-0.2980518
130.2	-0.3672955	130.2	-0.4215494	130.2	-0.3575912	130.2	-0.3137828	130.2	-0.3637713	130.2	-0.3293606	130.2	-0.3329775	130.2	-0.3280833	130.2	-0.3071789	130.2	-0.3687469	130.2	-0.3222675	130.2	-0.3062124	130.2	-0.3213427	130.2	-0.3102227	130.2	-0.2753786	130.2	-0.2975267
130.4	-0.3660321	130.4	-0.4230287	130.4	-0.356293	130.4	-0.3103161	130.4	-0.366283	130.4	-0.3272146	130.4	-0.3295611	130.4	-0.3260158	130.4	-0.3078947	130.4	-0.370571	130.4	-0.3203256	130.4	-0.3031973	130.4	-0.3173894	130.4	-0.3115242	130.4	-0.2747852	130.4	-0.292788
130.6	-0.3630481	130.6	-0.4238181	130.6	-0.3593436	130.6	-0.3139695	130.6	-0.3633661	130.6	-0.3264082	130.6	-0.3311433	130.6	-0.3242911	130.6	-0.3050478	130.6	-0.3692902	130.6	-0.3221236	130.6	-0.2988577	130.6	-0.317061	130.6	-0.309381	130.6	-0.2737064	130.6	-0.2951965
130.8	-0.36538	130.8	-0.4215382	130.8	-0.3539681	130.8	-0.3110002	130.8	-0.3631457	130.8	-0.3249324	130.8	-0.3337555	130.8	-0.3274275	130.8	-0.2991603	130.8	-0.3681756	130.8	-0.3237388	130.8	-0.3012109	130.8	-0.3193747	130.8	-0.3152499	130.8	-0.2759171	130.8	-0.295517
131	-0.3669939	131	-0.4258079	131	-0.3561927	131	-0.3196639	131	-0.3648109	131	-0.3261212	131	-0.3289002	131	-0.321986	131	-0.3029867	131	-0.3701466	131	-0.3258491	131	-0.3045021	131	-0.3139611	131	-0.3131004	131	-0.2724249	131	-0.2929792
131.2	-0.3679082	131.2	-0.4208853	131.2	-0.3551229	131.2	-0.3119047	131.2	-0.3593964	131.2	-0.3280092	131.2	-0.3236878	131.2	-0.3212776	131.2	-0.3035572	131.2	-0.3660516	131.2	-0.321976	131.2	-0.3007735	131.2	-0.3197559	131.2	-0.3140182	131.2	-0.2720253	131.2	-0.295267
131.4	-0.3641688	131.4	-0.4246795	131.4	-0.357298	131.4	-0.3121523	131.4	-0.3612858	131.4	-0.3241463	131.4	-0.3298697	131.4	-0.3296365	131.4	-0.3010875	131.4	-0.3684044	131.4	-0.3199692	131.4	-0.2993785	131.4	-0.3202668	131.4	-0.3139278	131.4	-0.2731999	131.4	-0.2970421
131.61	-0.3620458	131.61	-0.4221614	131.61	-0.3581378	131.61	-0.3104579	131.61	-0.3603328	131.61	-0.3270735	131.61	-0.3298853	131.61	-0.322531	131.6	-0.3044577	131.6	-0.3732825	131.6	-0.3248247	131.6	-0.3036858	131.6	-0.3134962	131.6	-0.3081666	131.6	-0.273072	131.6	-0.2964437
131.8	-0.369328	131.8	-0.4198399	131.8	-0.3578995	131.8	-0.3107236	131.8	-0.361065	131.8	-0.325548	131.8	-0.3259781	131.8	-0.3218926	131.8	-0.3051551	131.8	-0.3674799	131.8	-0.3234629	131.8	-0.3008237	131.8	-0.3144965	131.8	-0.3063112	131.8	-0.2715646	131.8	-0.2959788
132	-0.363353	132	-0.4190748	132	-0.3565448	132	-0.3079604	132	-0.3610841	132	-0.3226179	132	-0.326514	132	-0.3236163	132	-0.3010889	132	-0.3666422	132	-0.3188544	132	-0.2996805	132	-0.3193004	132	-0.3052305	132	-0.2714919	132	-0.2967317
132.2	-0.3635024	132.2	-0.4202063	132.2	-0.3583082	132.2	-0.3053927	132.2	-0.3591015	132.2	-0.3214754	132.2	-0.3267622	132.2	-0.3216058	132.2	-0.3024967	132.2	-0.3627559	132.2	-0.3215792	132.2	-0.3030168	132.2	-0.3146585	132.2	-0.3058496	132.2	-0.2726786	132.2	-0.2932211
132.4	-0.3617319	132.4	-0.4211633	132.4	-0.3531793	132.4	-0.3099491	132.4	-0.3632834	132.4	-0.3222428	132.4	-0.3279257	132.4	-0.3165101	132.4	-0.2998391	132.4	-0.3666474	132.4	-0.3196575	132.4	-0.3016233	132.4	-0.3118069	132.4	-0.3082311	132.4	-0.2745994	132.4	-0.2945377
132.61	-0.3599914	132.61	-0.4197171	132.61	-0.3546818	132.61	-0.3075957	132.61	-0.3568003	132.61	-0.3181382	132.61	-0.3286473	132.61	-0.3229048	132.6	-0.2982376	132.6	-0.3665228	132.6	-0.3255057	132.6	-0.2970027	132.6	-0.3169624	132.6	-0.3087067	132.6	-0.2720227	132.6	-0.2932332
132.8	-0.3663575	132.8	-0.416871	132.8	-0.3547524	132.8	-0.3091297	132.8	-0.3555759	132.8	-0.3266136	132.8	-0.3292974	132.8	-0.3211769	132.8	-0.3038141	132.8	-0.3614676	132.8	-0.3200153	132.8	-0.2962281	132.8	-0.313419	132.8	-0.309605	132.8	-0.2754613	132.8	-0.2941697
133	-0.3674629	133	-0.4144657	133	-0.3495603	133	-0.3083219	133	-0.3585293	133	-0.3229004	133	-0.3262339	133	-0.318429	133	-0.3027301	133	-0.3599629	133	-0.3172458	133	-0.2974025	133	-0.3151514	133	-0.309256	133	-0.2738947	133	-0.2886316
133.2	-0.3621286	133.2	-0.4231862	133.2	-0.3550987	133.2	-0.3043388	133.2	-0.3592684	133.2	-0.3218175	133.2	-0.3231923	133.2	-0.3184575	133.2	-0.2985659	133.2	-0.3629605	133.2	-0.3223378	133.2	-0.2961731	133.2	-0.315181	133.2	-0.3050454	133.2	-0.2708701	133.2	-0.2902102
133.4	-0.3607712	133.4	-0.4186786	133.4	-0.3519576	133.4	-0.3049883	133.4	-0.3607867	133.4	-0.3238027	133.4	-0.3253288	133.4	-0.314826	133.4	-0.2990122	133.4	-0.3635003	133.4	-0.3174444	133.4	-0.3011793	133.4	-0.3142748	133.4	-0.3053594	133.4	-0.2642986	133.4	-0.2941904
133.6	-0.3658573	133.6	-0.4198675	133.6	-0.3496196	133.6	-0.3065558	133.6	-0.3564083	133.6	-0.3226012	133.6	-0.3236392	133.6	-0.3184042	133.6	-0.2986637	133.6	-0.3639059	133.6	-0.3185703	133.6	-0.2980321	133.6	-0.3106501	133.6	-0.3037721	133.6	-0.2698656	133.6	-0.2880311
133.8	-0.3588053	133.8	-0.4148696	133.8	-0.3500499	133.8	-0.3080195	133.8	-0.3549559	133.8	-0.320215	133.8	-0.3224975	133.8	-0.318776	133.8	-0.301572	133.8	-0.357054	133.8	-0.3193995	133.8	-0.2964947	133.8	-0.3127423	133.8	-0.3020832	133.8	-0.2688889	133.8	-0.2932611
134	-0.3674299	134	-0.4186493	134	-0.3488108	134	-0.3064112	134	-0.3588975	134	-0.3201247	134	-0.3220748	134	-0.3145803	134	-0.2996763	134	-0.3575343	134	-0.3177868	134	-0.2934767	134	-0.3124138	134	-0.3048997	134	-0.2715256	134	-0.2853002
134.2	-0.3577807	134.2	-0.4130408	134.2	-0.3514663	134.2	-0.3076769	134.2	-0.3597423	134.2	-0.3203949	134.2	-0.3234893	134.2	-0.3186671	134.2	-0.2993098	134.2	-0.3636421	134.2	-0.3161472	134.2	-0.2986264	134.2	-0.3135176	134.2	-0.3008851	134.2	-0.2691298	134.2	-0.2936784
134.4	-0.3568681	134.4	-0.417022	134.4	-0.3518533	134.4	-0.3020793	134.4	-0.35337	134.4	-0.3181307	134.4	-0.3237007	134.4	-0.3131039	134.4	-0.296903	134.4	-0.3607963	134.4	-0.3144683	134.4	-0.2994075	134.4	-0.3093467	134.4	-0.2998233	134.4	-0.2691025	134.4	-0.2894542
134.6	-0.3598667	134.6	-0.4125954	134.6	-0.3494675	134.6	-0.3064435	134.6	-0.358445	134.6	-0.321418	134.6	-0.3257187	134.6	-0.3143549	134.6	-0.2999509	134.6	-0.3610836	134.6	-0.3176719	134.6	-0.2980593	134.6	-0.3133867	134.6	-0.3044121	134.6	-0.2663671	134.6	-0.2841031
134.8	-0.3585503	134.8	-0.415641	134.8	-0.3485477	134.8	-0.3048759	134.8	-0.3519349	134.8	-0.3177464	134.8	-0.3248407	134.8	-0.3126394	134.8	-0.2977667	134.8	-0.3561686	134.8	-0.3160919	134.8	-0.2947541	134.8	-0.3084777	134.8	-0.3035933	134.8	-0.2664832	134.8	-0.2900075
135	-0.3589655	135	-0.4172291	135	-0.3450149	135	-0.3031881	135	-0.3508759	135	-0.3181475	135	-0.3231509	135	-0.3201098	135	-0.2934421	135	-0.3610805	135	-0.3137268	135	-0.2945261	135	-0.3105161	135	-0.2987702	135	-0.2702836	135	-0.2832054
135.2	-0.3559198	135.2	-0.4146124	135.2	-0.3469463	135.2	-0.3075453	135.2	-0.363944	135.2	-0.3155752	135.2	-0.318968	135.2	-0.3153766	135.2	-0.29634	135.2	-0.3597595	135.2	-0.312455	135.2	-0.2929556	135.2	-0.3112375	135.2	-0.3013857	135.2	-0.270446	135.2	-0.2870182
135.4	-0.3589138	135.4	-0.4145779	135.4	-0.3475727	135.4	-0.3036931	135.4	-0.3565797	135.4	-0.3172388	135.4	-0.3222125	135.4	-0.3176454	135.4	-0.2942728	135.4	-0.3648402	135.4	-0.3117438	135.4	-0.2947934	135.4	-0.3053649	135.4	-0.3024758	135.4	-0.2622197	135.4	-0.2868984
135.6	-0.3577106	135.6	-0.4096471	135.6	-0.3502742	135.6	-0.3048181	135.6	-0.3481508	135.6	-0.3204626	135.6	-0.3261267	135.6	-0.3153175	135.6	-0.2967848	135.6	-0.3633088	135.6	-0.3138099	135.6	-0.2940768	135.6	-0.309201	135.6	-0.3043902	135.6	-0.2682993	135.6	-0.2897967
135.8	-0.3567176	135.8	-0.4152395	135.8	-0.3531105	135.8	-0.3035525	135.8	-0.3546684	135.8	-0.3199314	135.8	-0.3179184	135.8	-0.3168319	135.8	-0.2981799	135.8	-0.3567974	135.8	-0.3091564	135.8	-0.2916234	135.8	-0.3084886	135.8	-0.3006184	135.8	-0.2647597	135.8	-0.2833928
136	-0.3558604	136	-0.4157273	136	-0.345908	136	-0.2987914	136	-0.3499865	136	-0.3155474	136	-0.3237291	136	-0.3151394	136	-0.2967547	136	-0.3578075	136	-0.311342	136	-0.2933253	136	-0.3099948	136	-0.3006644	136	-0.263382	136	-0.2897304
136.2	-0.3581121	136.2	-0.4101795	136.2	-0.3459532	136.2	-0.3017174	136.2	-0.3497978	136.2	-0.314005	136.2	-0.3186735	136.2	-0.3139715	136.2	-0.2935857	136.2	-0.3599619	136.2	-0.3121888	136.2	-0.2956604	136.2	-0.307969	136.2	-0.2964511	136.2	-0.2670487	136.2	-0.2907618
136.4	-0.3545982	136.4	-0.4151626	136.4	-0.3492481	136.4	-0.3007213	136.4	-0.3563375	136.4	-0.3191706	136.4	-0.3206224	136.4	-0.3130195	136.4	-0.2956614	136.4	-0.359634	136.4	-0.3138498	136.4	-0.2919793	136.4	-0.3068523	136.4	-0.3003679	136.4	-0.2659464	136.4	-0.2835744
136.6	-0.3493049	136.6	-0.4171586	136.6	-0.342431	136.6	-0.3039091	136.6	-0.3489328	136.6	-0.3140744	136.6	-0.3178906	136.6	-0.3185561	136.6	-0.2898301	136.6	-0.3594057	136.6	-0.3107102	136.6	-0.2985623	136.6	-0.3044947	136.6	-0.2967115	136.6	-0.2641714	136.6	-0.2817492
136.8	-0.3542627	136.8	-0.4134828	136.8	-0.3466734	136.8	-0.3048487	136.8	-0.3509201	136.8	-0.3149191	136.8	-0.3180361	136.8	-0.3135237	136.8	-0.2920986	136.8	-0.3568467	136.8	-0.3103899	136.8	-0.2918387	136.8	-0.3138791	136.8	-0.2996767	136.8	-0.2657353	136.8	-0.2876642
137	-0.3576137	137	-0.4093197	137	-0.3484256	137	-0.3000354	137	-0.3520345	137	-0.3155143	137	-0.3168269	137	-0.3107078	137.02	-0.2945555	137.02	-0.3590956	137.02	-0.3111573	137.02	-0.2933423	137.02	-0.302388	137.02	-0.2983403	137.02	-0.2591958	137.02	-0.287255
137.2	-0.3561226	137.2	-0.41617	137.2	-0.3469221	137.2	-0.302134	137.2	-0.351125	137.2	-0.3148185	137.2	-0.3156181	137.2	-0.3126288	137.2	-0.2947959	137.2	-0.3593894	137.2	-0.3101407	137.2	-0.2879801	137.2	-0.3056831	137.2	-0.3014132	137.2	-0.2636978	137.2	-0.2865489
137.4	-0.3539035	137.4	-0.4152501	137.4	-0.3438406	137.4	-0.2997704	137.4	-0.3490565	137.4	-0.3148401	137.4	-0.3169614	137.4	-0.3114967	137.4	-0.295428	137.4	-0.3516572	137.4	-0.3080283	137.4	-0.2910399	137.4	-0.3068587	137.4	-0.2947001	137.4	-0.2631595	137.4	-0.2852849
137.6	-0.3561475	137.6	-0.4101601	137.6	-0.3414432	137.6	-0.2996766	137.6	-0.3513454	137.6	-0.3140354	137.6	-0.3146313	137.6	-0.3160663	137.6	-0.2957426	137.6	-0.3556325	137.6	-0.3072616	137.6	-0.2889844	137.6	-0.3057624	137.6	-0.2985517	137.6	-0.2626369	137.6	-0.2805053
137.8	-0.3591157	137.8	-0.4129024	137.8	-0.3413897	137.8	-0.2978224	137.8	-0.344622	137.8	-0.3143818	137.8	-0.3167428	137.8	-0.3096157	137.8	-0.2904836	137.8	-0.3547127	137.8	-0.3095018	137.8	-0.2930552	137.8	-0.3014093	137.8	-0.299623	137.8	-0.2633309	137.8	-0.2828528
138	-0.3518654	138	-0.4088671	138	-0.3420984	138	-0.3031948	138	-0.3472909	138	-0.3138694	138	-0.3132862	138	-0.314736	138	-0.2913157	138	-0.3536526	138	-0.3069073	138	-0.2888613	138	-0.3023932	138	-0.296744	138	-0.263979	138	-0.2829482
138.2	-0.3567284	138.2	-0.4072154	138.2	-0.3443244	138.2	-0.3006124	138.2	-0.3560668	138.2	-0.310362	138.2	-0.3184362	138.2	-0.3126356	138.2	-0.2885642	138.2	-0.3528046	138.2	-0.3094545	138.2	-0.2890306	138.2	-0.3015697	138.2	-0.2907114	138.2	-0.2606368	138.2	-0.2821725
138.4	-0.3563999	138.4	-0.4085876	138.4	-0.3428184	138.4	-0.2905988	138.4	-0.3528824	138.4	-0.312573	138.4	-0.3157561	138.4	-0.3119451	138.4	-0.2863964	138.4	-0.3592407	138.4	-0.3043688	138.4	-0.2860824	138.4	-0.3070998	138.4	-0.2947433	138.4	-0.2643586	138.4	-0.2809603
138.6	-0.3562816	138.6	-0.4123921	138.6	-0.3450875	138.6	-0.2991715	138.6	-0.3495105	138.6	-0.3159046	138.6	-0.3168179	138.6	-0.3083002	138.6	-0.289131	138.6	-0.3531768	138.6	-0.3114302	138.6	-0.2919799	138.6	-0.3084917	138.6	-0.2965658	138.6	-0.2638496	138.6	-0.2812999
138.8	-0.3533086	138.8	-0.40583	138.8	-0.3415877	138.8	-0.2990152	138.8	-0.3476921	138.8	-0.3111141	138.8	-0.315226	138.8	-0.3134958	138.8	-0.2895851	138.8	-0.3544393	138.8	-0.3052976	138.8	-0.2918851	138.8	-0.3050771	138.8	-0.2968728	138.8	-0.26154	138.8	-0.28415
139	-0.3593676	139	-0.4083809	139	-0.3400332	139	-0.2985791	139	-0.3474554	139	-0.3143742	139	-0.3142365	139	-0.3096868	139	-0.2882083	139	-0.3558912	139	-0.3055725	139	-0.287051	139	-0.3041802	139	-0.2966594	139	-0.2626023	139	-0.2808532
139.2	-0.3511336	139.2	-0.4058159	139.2	-0.3395024	139.2	-0.2967626	139.2	-0.3479438	139.2	-0.3104458	139.2	-0.3147026	139.2	-0.3063089	139.2	-0.2880345	139.2	-0.3534064	139.2	-0.3008421	139.2	-0.2885333	139.2	-0.303359	139.2	-0.294556	139.2	-0.2627508	139.2	-0.2819394
139.41	-0.3500897	139.41	-0.4085362	139.41	-0.3383747	139.41	-0.3003851	139.41	-0.3444836	139.41	-0.3084155	139.41	-0.3153513	139.41	-0.3115525	139.4	-0.2878093	139.4	-0.3511092	139.4	-0.3080513	139.4	-0.2881138	139.4	-0.30358	139.4	-0.2927454	139.4	-0.2625176	139.4	-0.2795514
139.6	-0.3453628	139.6	-0.4088891	139.6	-0.3397289	139.6	-0.2948505	139.6	-0.3483035	139.6	-0.3078977	139.6	-0.3111896	139.6	-0.3098979	139.6	-0.2922258	139.6	-0.3536905	139.6	-0.3074424	139.6	-0.2864231	139.6	-0.3045456	139.6	-0.2943603	139.6	-0.2576645	139.6	-0.2815876
139.8	-0.3529656	139.8	-0.4043134	139.8	-0.3367942	139.8	-0.2960213	139.8	-0.3436602	139.8	-0.3164802	139.8	-0.3101116	139.8	-0.3085523	139.8	-0.2867997	139.8	-0.3512688	139.8	-0.3071527	139.8	-0.2908804	139.8	-0.2989517	139.8	-0.2971583	139.8	-0.2576949	139.8	-0.2811469
140	-0.3473174	140	-0.4023975	140	-0.3413963	140	-0.2942565	140	-0.3432236	140	-0.3117329	140	-0.3141851	140	-0.3033257	140	-0.2936521	140	-0.3535542	140	-0.3050998	140	-0.2848593	140	-0.3008848	140	-0.2924181	140	-0.2587467	140	-0.2800881
140.2	-0.3470441	140.2	-0.4070627	140.2	-0.3406346	140.2	-0.2953663	140.2	-0.3498276	140.2	-0.3097962	140.2	-0.3109624	140.2	-0.3083996	140.2	-0.2846598	140.2	-0.349613	140.2	-0.3069211	140.2	-0.2856438	140.2	-0.2962824	140.2	-0.295191	140.2	-0.2530378	140.2	-0.2826936
140.41	-0.3502937	140.41	-0.4050626	140.41	-0.3409249	140.41	-0.2956785	140.41	-0.3469307	140.41	-0.3061821	140.41	-0.3154457	140.41	-0.3091544	140.4	-0.2875953	140.4	-0.3542263	140.4	-0.3036591	140.4	-0.2900803	140.4	-0.3037992	140.4	-0.295985	140.4	-0.2565351	140.4	-0.2791116
140.6	-0.3505012	140.6	-0.4067522	140.6	-0.3403978	140.6	-0.3007007	140.6	-0.3424791	140.6	-0.3068032	140.6	-0.3111458	140.6	-0.3060621	140.6	-0.2875517	140.6	-0.3487652	140.6	-0.3003294	140.6	-0.286246	140.6	-0.3012698	140.6	-0.2905259	140.6	-0.2543211	140.6	-0.276939
140.8	-0.3523757	140.8	-0.4060944	140.8	-0.3406731	140.8	-0.2920476	140.8	-0.3455966	140.8	-0.3085914	140.8	-0.3102643	140.8	-0.3046036	140.8	-0.286703	140.8	-0.3503967	140.8	-0.3073173	140.8	-0.2836662	140.8	-0.3015521	140.8	-0.2896889	140.8	-0.2574876	140.8	-0.2741233
141	-0.3520594	141	-0.4064743	141	-0.3374196	141	-0.2948325	141	-0.3388931	141	-0.3070298	141	-0.3120868	141	-0.3028722	141.02	-0.2857073	141.02	-0.3513526	141.02	-0.3045413	141.02	-0.2816408	141.02	-0.3006625	141.02	-0.2933154	141.02	-0.259109	141.02	-0.2787953
141.2	-0.3491651	141.2	-0.4053333	141.2	-0.3387948	141.2	-0.2953341	141.2	-0.3421316	141.2	-0.3070087	141.2	-0.3113942	141.2	-0.3052681	141.2	-0.282871	141.2	-0.3516305	141.2	-0.3031736	141.2	-0.2846909	141.2	-0.3007021	141.2	-0.2879232	141.2	-0.2549858	141.2	-0.2809308
141.4	-0.3508482	141.4	-0.4042778	141.4	-0.3382421	141.4	-0.2921214	141.4	-0.341722	141.4	-0.3084371	141.4	-0.3140671	141.4	-0.3097197	141.4	-0.2837626	141.4	-0.3442093	141.4	-0.3036186	141.4	-0.2840621	141.4	-0.3049342	141.4	-0.2875889	141.4	-0.2585805	141.4	-0.2770449
141.6	-0.348105	141.6	-0.4066553	141.6	-0.3338097	141.6	-0.2908243	141.6	-0.3436943	141.6	-0.3088821	141.6	-0.3112891	141.6	-0.3057335	141.6	-0.2857439	141.6	-0.3400431	141.6	-0.302206	141.6	-0.2845652	141.6	-0.2976231	141.6	-0.2896288	141.6	-0.2540541	141.6	-0.2740075
141.8	-0.3460989	141.8	-0.4064388	141.8	-0.3431056	141.8	-0.2928945	141.8	-0.3429261	141.8	-0.3055732	141.8	-0.3104536	141.8	-0.3058398	141.8	-0.2882404	141.8	-0.3417585	141.8	-0.3049011	141.8	-0.280985	141.8	-0.2957255	141.8	-0.2900602	141.8	-0.2558935	141.8	-0.274885
142	-0.3472042	142	-0.4012308	142	-0.3389156	142	-0.2923942	142	-0.3386961	142	-0.3055116	142	-0.3110989	142	-0.3059787	142	-0.2865782	142	-0.3478372	142	-0.3039715	142	-0.283664	142	-0.2960714	142	-0.2890693	142	-0.2545426	142	-0.2789761
142.2	-0.344295	142.2	-0.4065862	142.2	-0.3378382	142.2	-0.2899266	142.2	-0.3386927	142.2	-0.3047445	142.2	-0.3065565	142.2	-0.3047242	142.2	-0.2869295	142.2	-0.3405542	142.2	-0.3016953	142.2	-0.2797666	142.2	-0.2991515	142.2	-0.2905633	142.2	-0.2535543	142.2	-0.2791969
142.4	-0.349599	142.4	-0.402986	142.4	-0.3419937	142.4	-0.2915226	142.4	-0.3423955	142.4	-0.3075464	142.4	-0.3105269	142.4	-0.3034409	142.4	-0.2834373	142.4	-0.3479624	142.4	-0.3014093	142.4	-0.2797512	142.4	-0.3007771	142.4	-0.2906572	142.4	-0.2557018	142.4	-0.2741934
142.6	-0.3454286	142.6	-0.4030564	142.6	-0.3364882	142.6	-0.2931766	142.6	-0.3424439	142.6	-0.3067602	142.6	-0.3092937	142.6	-0.3026117	142.6	-0.2824949	142.6	-0.3463954	142.6	-0.301097	142.6	-0.2831212	142.6	-0.2956111	142.6	-0.2903835	142.6	-0.2564355	142.6	-0.2761756
142.8	-0.3474378	142.8	-0.4023911	142.8	-0.3359003	142.8	-0.289692	142.8	-0.3428559	142.8	-0.3014915	142.8	-0.3064827	142.8	-0.3012198	142.8	-0.2819177	142.8	-0.3451134	142.8	-0.2980627	142.8	-0.2811345	142.8	-0.3009868	142.8	-0.2914506	142.8	-0.2547244	142.8	-0.274359
143	-0.345038	143	-0.4042723	143	-0.3313605	143	-0.2931926	143	-0.3389193	143	-0.3037523	143	-0.3076874	143	-0.299222	143	-0.2829619	143	-0.3447291	143	-0.2964519	143	-0.2801488	143	-0.2987641	143	-0.286736	143	-0.2533601	143	-0.2773564
143.2	-0.3483612	143.2	-0.400216	143.2	-0.3350284	143.2	-0.2884458	143.2	-0.3418464	143.2	-0.308224	143.2	-0.3052761	143.2	-0.301257	143.2	-0.2867478	143.2	-0.3473098	143.2	-0.2994947	143.2	-0.2808864	143.2	-0.2991042	143.2	-0.2869396	143.2	-0.252834	143.2	-0.2741877
143.4	-0.3406857	143.4	-0.4001597	143.4	-0.3340741	143.4	-0.2893095	143.4	-0.3414277	143.4	-0.3047847	143.4	-0.3112343	143.4	-0.3029333	143.4	-0.2827782	143.4	-0.3414136	143.4	-0.300764	143.4	-0.2799326	143.4	-0.2929265	143.4	-0.2888789	143.4	-0.2511095	143.4	-0.278811
143.6	-0.3390495	143.6	-0.3988648	143.6	-0.3351898	143.6	-0.2855483	143.6	-0.3382837	143.6	-0.3056878	143.6	-0.3053552	143.6	-0.3025238	143.6	-0.2800079	143.6	-0.3442413	143.6	-0.2977915	143.6	-0.2825207	143.6	-0.2971914	143.6	-0.2835619	143.6	-0.252703	143.6	-0.2742176
143.8	-0.3441412	143.8	-0.4013002	143.8	-0.3321156	143.8	-0.2882905	143.8	-0.3383901	143.8	-0.3002104	143.8	-0.3054534	143.8	-0.3054123	143.8	-0.2811513	143.8	-0.3417055	143.8	-0.2968541	143.8	-0.2842096	143.8	-0.2937612	143.8	-0.2889375	143.8	-0.2512833	143.8	-0.2767416
144	-0.3404534	144	-0.398103	144	-0.3372563	144	-0.2934385	144	-0.3406581	144	-0.3021427	144	-0.3059035	144	-0.3002869	144	-0.2783988	144	-0.3423362	144	-0.2973494	144	-0.2780754	144	-0.2893657	144	-0.285221	144	-0.2472379	144	-0.2768519
144.2	-0.347249	144.2	-0.4018256	144.2	-0.3337009	144.2	-0.2899771	144.2	-0.339019	144.2	-0.3042293	144.2	-0.3066754	144.2	-0.3071758	144.2	-0.2795904	144.2	-0.345688	144.2	-0.2974025	144.2	-0.2807256	144.2	-0.2928558	144.2	-0.2881322	144.2	-0.250758	144.2	-0.2710377
144.4	-0.3440765	144.4	-0.3964913	144.4	-0.3284139	144.4	-0.2844969	144.4	-0.3366112	144.4	-0.3061087	144.4	-0.3044356	144.4	-0.2983066	144.4	-0.2850723	144.4	-0.3472995	144.4	-0.2981988	144.4	-0.2818535	144.4	-0.2947443	144.4	-0.2867928	144.4	-0.250508	144.4	-0.2733413
144.61	-0.3394254	144.61	-0.3989154	144.61	-0.3269524	144.61	-0.2855077	144.61	-0.336104	144.61	-0.3004001	144.61	-0.3033731	144.61	-0.3015155	144.6	-0.284138	144.6	-0.3418609	144.6	-0.3013755	144.6	-0.2798843	144.6	-0.2912184	144.6	-0.2866322	144.6	-0.2506638	144.6	-0.271128
144.8	-0.3412695	144.8	-0.4005032	144.8	-0.3308398	144.8	-0.2896592	144.8	-0.337543	144.8	-0.3028878	144.8	-0.3030464	144.8	-0.3007969	144.8	-0.280241	144.8	-0.3427487	144.8	-0.2977531	144.8	-0.2817112	144.8	-0.2945344	144.8	-0.2845723	144.8	-0.2516601	144.8	-0.2762151
145	-0.3461514	145	-0.396247	145	-0.3343083	145	-0.2877448	145	-0.334203	145	-0.3043742	145	-0.3055427	145	-0.2997396	145	-0.28104	145	-0.3367693	145	-0.297532	145	-0.2764423	145	-0.2908476	145	-0.2837766	145	-0.2525682	145	-0.2721611
145.2	-0.3424718	145.2	-0.4015684	145.2	-0.3311446	145.2	-0.2901132	145.2	-0.3383473	145.2	-0.3012996	145.2	-0.3041528	145.2	-0.2994036	145.2	-0.2749338	145.2	-0.3441348	145.2	-0.2999257	145.2	-0.2784463	145.2	-0.2884433	145.2	-0.286162	145.2	-0.2447399	145.2	-0.2717663
145.4	-0.3412674	145.4	-0.3977447	145.4	-0.331951	145.4	-0.288303	145.4	-0.3354907	145.4	-0.3061894	145.4	-0.30529	145.4	-0.2985176	145.4	-0.2784002	145.4	-0.3409704	145.4	-0.2973156	145.4	-0.2795109	145.4	-0.2885229	145.4	-0.2811826	145.4	-0.2463485	145.4	-0.2746977
145.6	-0.3388537	145.6	-0.3978904	145.6	-0.3334622	145.6	-0.2868287	145.6	-0.331956	145.6	-0.3027319	145.6	-0.3005171	145.6	-0.2988169	145.6	-0.2770995	145.6	-0.3396686	145.6	-0.2958508	145.6	-0.2809611	145.6	-0.2940498	145.6	-0.2822509	145.6	-0.2505769	145.6	-0.2728828
145.8	-0.3422508	145.8	-0.4003957	145.8	-0.333798	145.8	-0.2830241	145.8	-0.3368149	145.8	-0.2983636	145.8	-0.3063641	145.8	-0.300382	145.8	-0.2786589	145.8	-0.3425612	145.8	-0.2935579	145.8	-0.2814084	145.8	-0.2901279	145.8	-0.2818671	145.8	-0.24905	145.8	-0.2767844
146	-0.3419361	146	-0.3986928	146	-0.3286605	146	-0.2851453	146	-0.3336225	146	-0.30214	146	-0.2999699	146	-0.295898	146	-0.2786022	146	-0.3401446	146	-0.2948651	146	-0.277398	146	-0.2907156	146	-0.2816741	146	-0.2504928	146	-0.2713415
146.2	-0.3423113	146.2	-0.3941781	146.2	-0.3276697	146.2	-0.287017	146.2	-0.3408055	146.2	-0.2965733	146.2	-0.3076788	146.2	-0.2964183	146.2	-0.2795937	146.2	-0.3365777	146.2	-0.2983398	146.2	-0.2806341	146.2	-0.2932678	146.2	-0.2829939	146.2	-0.2503159	146.2	-0.2696249
146.4	-0.3397818	146.4	-0.3982196	146.4	-0.3287605	146.4	-0.2861437	146.4	-0.3369506	146.4	-0.2962804	146.4	-0.2999713	146.4	-0.2974416	146.4	-0.2792331	146.4	-0.3455395	146.4	-0.2932377	146.4	-0.2770997	146.4	-0.2918804	146.4	-0.2803161	146.4	-0.2467628	146.4	-0.2645505
146.6	-0.3405147	146.6	-0.3971168	146.6	-0.3319092	146.6	-0.28259	146.6	-0.3348327	146.6	-0.2989169	146.6	-0.3027676	146.6	-0.298346	146.6	-0.2766161	146.6	-0.3440696	146.6	-0.2943809	146.6	-0.2726855	146.6	-0.2910164	146.6	-0.2834267	146.6	-0.246417	146.6	-0.2685864
146.8	-0.3397622	146.8	-0.3946812	146.8	-0.3265731	146.8	-0.2848957	146.8	-0.330472	146.8	-0.3004642	146.8	-0.3015081	146.8	-0.2948497	146.8	-0.2751406	146.8	-0.336721	146.8	-0.294099	146.8	-0.2756657	146.8	-0.2892198	146.8	-0.281954	146.8	-0.246874	146.8	-0.26514
147	-0.3346492	147	-0.3950119	147	-0.3305467	147	-0.282899	147	-0.337364	147	-0.2980948	147	-0.2991063	147	-0.2986931	147	-0.2779317	147	-0.3413092	147	-0.2923226	147	-0.274412	147	-0.2903491	147	-0.2795063	147	-0.247578	147	-0.2669658
147.2	-0.340146	147.2	-0.3984955	147.2	-0.3280104	147.2	-0.2864041	147.2	-0.3348194	147.2	-0.2990675	147.2	-0.2960618	147.2	-0.3008514	147.2	-0.2739673	147.2	-0.3416919	147.2	-0.2935594	147.2	-0.2769708	147.2	-0.287969	147.2	-0.2834784	147.2	-0.2432158	147.2	-0.267408
147.4	-0.3426751	147.4	-0.3946498	147.4	-0.3292757	147.4	-0.2813666	147.4	-0.3319373	147.4	-0.3005957	147.4	-0.2982554	147.4	-0.2943491	147.4	-0.2750145	147.4	-0.3374355	147.4	-0.2977739	147.4	-0.2762202	147.4	-0.2858941	147.4	-0.2828893	147.4	-0.2440095	147.4	-0.2688244
147.6	-0.3371554	147.6	-0.395101	147.6	-0.3263952	147.6	-0.2873353	147.6	-0.3324312	147.6	-0.2952304	147.6	-0.3003309	147.6	-0.2951208	147.6	-0.2744638	147.6	-0.3391022	147.6	-0.2883612	147.6	-0.2747594	147.6	-0.2862759	147.6	-0.2831811	147.6	-0.244324	147.6	-0.2707663
147.8	-0.3368017	147.8	-0.3932189	147.8	-0.3310993	147.8	-0.2793976	147.8	-0.3292153	147.8	-0.2978335	147.8	-0.2988808	147.8	-0.2938228	147.8	-0.2737508	147.8	-0.3393241	147.8	-0.2933665	147.8	-0.2728913	147.8	-0.2895161	147.8	-0.2807763	147.8	-0.2458583	147.8	-0.2690802
148	-0.3392014	148	-0.3946415	148	-0.3229927	148	-0.2828894	148	-0.3270044	148	-0.2956015	148	-0.3017184	148	-0.2967384	148	-0.2700011	148	-0.3392139	148	-0.2945542	148	-0.2736269	148	-0.2895378	148	-0.2795181	148	-0.2429505	148	-0.2744032
148.21	-0.3392397	148.21	-0.3953068	148.21	-0.3262748	148.21	-0.2811157	148.21	-0.3304564	148.21	-0.2987581	148.21	-0.2982672	148.21	-0.2936301	148.21	-0.2743801	148.21	-0.3367895	148.21	-0.2925299	148.21	-0.2701275	148.21	-0.2884045	148.21	-0.2798035	148.21	-0.2429416	148.21	-0.2706365
148.4	-0.3373849	148.4	-0.3932562	148.4	-0.3292031	148.4	-0.2796485	148.4	-0.3336487	148.4	-0.2983595	148.4	-0.3009173	148.4	-0.2959249	148.4	-0.2723392	148.4	-0.3349126	148.4	-0.2923395	148.4	-0.2737475	148.4	-0.2831222	148.4	-0.2794914	148.4	-0.2450729	148.4	-0.2637252
148.6	-0.3375895	148.6	-0.3907807	148.6	-0.3287444	148.6	-0.2814307	148.6	-0.330131	148.6	-0.2968087	148.6	-0.297601	148.6	-0.2989668	148.6	-0.2716714	148.6	-0.3339362	148.6	-0.2988478	148.6	-0.2776524	148.6	-0.2877193	148.6	-0.2764367	148.6	-0.2461244	148.6	-0.2595159
148.8	-0.3321866	148.8	-0.3952581	148.8	-0.3248088	148.8	-0.2807861	148.8	-0.333239	148.8	-0.2979647	148.8	-0.3032016	148.8	-0.2973397	148.8	-0.2702965	148.8	-0.3321749	148.8	-0.2900768	148.8	-0.270696	148.8	-0.285242	148.8	-0.2779162	148.8	-0.2409028	148.8	-0.2677628
149	-0.3377173	149	-0.3960904	149	-0.3272607	149	-0.2879478	149	-0.3302098	149	-0.292756	149	-0.2997591	149	-0.2926779	149	-0.2729252	149	-0.3310114	149	-0.2915746	149	-0.2726249	149	-0.2865082	149	-0.2774279	149	-0.2424175	149	-0.2667238
149.2	-0.3388448	149.2	-0.3946056	149.2	-0.3231348	149.2	-0.2812041	149.2	-0.328957	149.2	-0.2950662	149.2	-0.2993352	149.2	-0.2922763	149.2	-0.2720259	149.2	-0.3371146	149.2	-0.2925166	149.2	-0.274587	149.2	-0.2857517	149.2	-0.2739327	149.2	-0.244536	149.2	-0.26398
149.4	-0.3342768	149.4	-0.3900385	149.4	-0.3303331	149.4	-0.2806101	149.4	-0.3297547	149.4	-0.2945105	149.4	-0.3002075	149.4	-0.291846	149.4	-0.2719852	149.4	-0.3325276	149.4	-0.2862645	149.4	-0.2681248	149.4	-0.2856882	149.4	-0.2792628	149.4	-0.242129	149.4	-0.2693313
149.6	-0.3381631	149.6	-0.3938545	149.6	-0.3208093	149.6	-0.2799746	149.6	-0.3311056	149.6	-0.294109	149.6	-0.2989652	149.6	-0.2923721	149.6	-0.2703939	149.6	-0.3329555	149.6	-0.2894523	149.6	-0.2699745	149.6	-0.2881812	149.6	-0.2722346	149.6	-0.2409383	149.6	-0.2639595
149.8	-0.3363211	149.8	-0.3953969	149.8	-0.3212098	149.8	-0.2793437	149.8	-0.329351	149.8	-0.2972877	149.8	-0.2979133	149.8	-0.2902177	149.8	-0.2718083	149.8	-0.3365213	149.8	-0.2910449	149.8	-0.2696544	149.8	-0.2846261	149.8	-0.278424	149.8	-0.2426534	149.8	-0.2648251
150	-0.3534752	150	-0.4151358	150	-0.3449908	150	-0.3020433	150	-0.34917	150	-0.3104395	150	-0.3080209	150	-0.2849922	150	-0.2700203	150	-0.3323916	150	-0.2884436	150	-0.2722184	150	-0.2837992	150	-0.2736854	150	-0.2405068	150	-0.2659669
150.2	-0.3477473	150.2	-0.4028489	150.2	-0.3389898	150.2	-0.2958376	150.2	-0.3449908	150.2	-0.3040204	150.2	-0.3017145	150.2	-0.2844344	150.2	-0.2701766	150.2	-0.3321033	150.2	-0.2879612	150.2	-0.2701116	150.2	-0.2857939	150.2	-0.2744378	150.2	-0.2379545	150.2	-0.2646102
150.4	-0.3442599	150.4	-0.3959481	150.4	-0.3277462	150.4	-0.2877432	150.4	-0.3365584	150.4	-0.2977261	150.4	-0.296684	150.4	-0.2839997	150.4	-0.2686606	150.4	-0.3298634	150.4	-0.2869735	150.4	-0.269414	150.4	-0.2835784	150.4	-0.2699467	150.4	-0.241128	150.4	-0.262921
150.6	-0.3367384	150.6	-0.3886684	150.6	-0.3236958	150.6	-0.2852603	150.6	-0.3271744	150.6	-0.2937919	150.6	-0.2943132	150.6	-0.2820749	150.6	-0.2693542	150.6	-0.3310386	150.6	-0.2885753	150.6	-0.2672263	150.6	-0.2832961	150.6	-0.2739483	150.6	-0.2367286	150.6	-0.261754
150.8	-0.326969	150.8	-0.3828778	150.8	-0.3174086	150.8	-0.2741297	150.8	-0.3203154	150.8	-0.2840974	150.8	-0.2862903	150.8	-0.2847259	150.8	-0.2690543	150.8	-0.3308913	150.8	-0.2932386	150.8	-0.268607	150.8	-0.2855373	150.8	-0.2739852	150.8	-0.2432607	150.8	-0.2662348
151	-0.3195359	151	-0.3702693	151	-0.307102	151	-0.2629224	151	-0.307248	151	-0.276536	151	-0.2801512	151	-0.2846294	151	-0.2708631	151	-0.3296847	151	-0.2845651	151	-0.2645115	151	-0.2771871	151	-0.2747904	151	-0.2391701	151	-0.2608239
151.2	-0.3099693	151.2	-0.3649395	151.2	-0.2972436	151.2	-0.25367	151.2	-0.3057811	151.2	-0.2691785	151.2	-0.2639944	151.2	-0.279605	151.2	-0.2696367	151.2	-0.3306588	151.2	-0.2902385	151.2	-0.2710594	151.2	-0.2802249	151.2	-0.2776881	151.2	-0.2378133	151.2	-0.2626447
151.4	-0.2966612	151.4	-0.3599121	151.4	-0.2915524	151.4	-0.2494046	151.4	-0.2975185	151.4	-0.2618567	151.4	-0.2624896	151.4	-0.2843929	151.4	-0.2635876	151.4	-0.3312602	151.4	-0.2860933	151.4	-0.2653693	151.4	-0.2788688	151.4	-0.2730278	151.4	-0.236131	151.4	-0.2579773
151.6	-0.2888099	151.6	-0.3521807	151.6	-0.2818916	151.6	-0.2400926	151.6	-0.2849507	151.6	-0.2523222	151.6	-0.2504817	151.6	-0.2787302	151.6	-0.2696644	151.6	-0.332027	151.6	-0.2848199	151.6	-0.2712999	151.6	-0.2829279	151.6	-0.271282	151.6	-0.2366635	151.6	-0.2613125
151.8	-0.2824387	151.8	-0.3424935	151.8	-0.2752743	151.8	-0.2310133	151.8	-0.276775	151.8	-0.2455386	151.8	-0.2495028	151.8	-0.2818476	151.8	-0.2668737	151.8	-0.3327515	151.8	-0.2847029	151.8	-0.266701	151.8	-0.2865994	151.8	-0.2758726	151.8	-0.2358999	151.8	-0.2613071
152	-0.2778923	152	-0.338587	152	-0.2660109	152	-0.2294281	152	-0.2772717	152	-0.235171	152	-0.2378643	152	-0.2810178	152	-0.2713358	152	-0.3296126	152	-0.2877122	152	-0.2683725	152	-0.2804416	152	-0.2706794	152	-0.2338584	152	-0.2614452
152.2	-0.271325	152.2	-0.3265062	152.2	-0.2632275	152.2	-0.2228255	152.2	-0.2642548	152.2	-0.2292914	152.2	-0.2310826	152.2	-0.2807246	152.2	-0.2684729	152.2	-0.333102	152.2	-0.2780582	152.2	-0.2702152	152.2	-0.2826745	152.2	-0.2739989	152.2	-0.2360051	152.2	-0.2666606
152.4	-0.2577346	152.4	-0.316854	152.4	-0.2511545	152.4	-0.2134341	152.4	-0.2570744	152.4	-0.2212206	152.4	-0.2237536	152.4	-0.2774392	152.4	-0.2687042	152.4	-0.3315605	152.4	-0.2883236	152.4	-0.2660797	152.4	-0.2812254	152.4	-0.2701851	152.4	-0.2387021	152.4	-0.2617063
152.6	-0.2537222	152.6	-0.3070758	152.6	-0.2447061	152.6	-0.2018522	152.6	-0.2546743	152.6	-0.2116297	152.6	-0.2143569	152.6	-0.2768024	152.6	-0.2698708	152.6	-0.3340864	152.6	-0.2855518	152.6	-0.2648137	152.6	-0.2815466	152.6	-0.271903	152.6	-0.2358569	152.6	-0.2681028
152.8	-0.2475068	152.8	-0.299226	152.8	-0.2352694	152.8	-0.1914963	152.8	-0.241222	152.8	-0.2090237	152.8	-0.207414	152.8	-0.2797513	152.8	-0.2672738	152.8	-0.3274508	152.8	-0.2857471	152.8	-0.2659932	152.8	-0.2766631	152.8	-0.2717893	152.8	-0.2370521	152.8	-0.2567775
153	-0.2400293	153	-0.2918132	153	-0.226518	153	-0.1887493	153	-0.2369331	153	-0.19509	153	-0.2011064	153	-0.2766356	153	-0.2701702	153	-0.3294624	153	-0.2811939	153	-0.2661479	153	-0.2788405	153	-0.2723079	153	-0.2352907	153	-0.2613584
153.2	-0.2350392	153.2	-0.2815521	153.2	-0.2230203	153.2	-0.1797004	153.2	-0.2284263	153.2	-0.1901545	153.2	-0.1941394	153.2	-0.278908	153.2	-0.2664235	153.2	-0.3273684	153.2	-0.2839387	153.2	-0.2667038	153.2	-0.2787547	153.2	-0.2693931	153.2	-0.2340171	153.2	-0.2575089
153.4	-0.2232708	153.4	-0.2784304	153.4	-0.2182489	153.4	-0.1724004	153.4	-0.2173131	153.4	-0.1878074	153.4	-0.1769337	153.4	-0.2768162	153.4	-0.2614917	153.4	-0.3284321	153.4	-0.283258	153.4	-0.2593669	153.4	-0.2788215	153.4	-0.2678645	153.4	-0.2362169	153.4	-0.2625031
153.6	-0.2151725	153.6	-0.2642184	153.6	-0.2067035	153.6	-0.1617673	153.6	-0.2093508	153.6	-0.1748393	153.6	-0.1769085	153.6	-0.2800024	153.6	-0.2636258	153.6	-0.3301448	153.6	-0.284568	153.6	-0.2636354	153.6	-0.2806291	153.6	-0.2706689	153.6	-0.2346953	153.6	-0.2609889
153.8	-0.2086187	153.8	-0.2607237	153.8	-0.2008208	153.8	-0.1563272	153.8	-0.2008483	153.8	-0.1696561	153.8	-0.1656158	153.8	-0.2764358	153.8	-0.2642516	153.8	-0.3248909	153.8	-0.2805375	153.8	-0.2636308	153.8	-0.2776031	153.8	-0.2702274	153.8	-0.2350596	153.8	-0.2585665
154	-0.2005611	154	-0.2534183	154	-0.1907207	154	-0.1470691	154	-0.1954289	154	-0.1595669	154	-0.1644116	154	-0.2777134	154	-0.2631162	154	-0.3271475	154	-0.282302	154	-0.2698912	154	-0.2824354	154	-0.270754	154	-0.2329814	154	-0.2644419
154.2	-0.1955012	154.2	-0.2446505	154.2	-0.1827232	154.2	-0.1400037	154.2	-0.186485	154.2	-0.1543721	154.2	-0.1506968	154.2	-0.2767715	154.2	-0.2641011	154.2	-0.3284858	154.2	-0.276377	154.2	-0.266217	154.2	-0.2743856	154.2	-0.2668295	154.2	-0.2326972	154.2	-0.2604297
154.4	-0.1842925	154.4	-0.239204	154.4	-0.1781463	154.4	-0.1356377	154.4	-0.1797789	154.4	-0.1430742	154.4	-0.1452136	154.4	-0.2811552	154.4	-0.2621646	154.4	-0.3266223	154.4	-0.2874496	154.4	-0.2640182	154.4	-0.2774751	154.4	-0.2695293	154.4	-0.2277258	154.4	-0.2620134
154.6	-0.1733966	154.6	-0.2304556	154.6	-0.1729905	154.6	-0.1251698	154.6	-0.1718878	154.6	-0.1369439	154.6	-0.1404275	154.6	-0.2836475	154.6	-0.2667039	154.6	-0.3298069	154.6	-0.2793675	154.6	-0.2646687	154.6	-0.2783099	154.6	-0.2728956	154.6	-0.2335203	154.6	-0.2580107
154.8	-0.1706556	154.8	-0.2196447	154.8	-0.1610445	154.8	-0.1178997	154.8	-0.1644904	154.8	-0.1318461	154.8	-0.1313132	154.8	-0.2766285	154.8	-0.2603422	154.8	-0.326463	154.8	-0.285934	154.8	-0.2616326	154.8	-0.2781306	154.8	-0.2659883	154.8	-0.2335984	154.8	-0.264039
155	-0.1595369	155	-0.2144237	155	-0.1514882	155	-0.1145904	155	-0.1529091	155	-0.1201179	155	-0.1198812	155	-0.2738237	155	-0.2611157	155	-0.3261189	155	-0.2840539	155	-0.2626034	155	-0.2767256	155	-0.26488	155	-0.2316153	155	-0.2574017
155.2	-0.152641	155.2	-0.206035	155.2	-0.1456449	155.2	-0.1037316	155.2	-0.1467957	155.2	-0.113626	155.2	-0.1156004	155.2	-0.2776307	155.2	-0.2654182	155.2	-0.3254308	155.2	-0.2820598	155.2	-0.2609109	155.2	-0.2761343	155.2	-0.2667171	155.2	-0.2301904	155.2	-0.257542
155.4	-0.1464418	155.4	-0.1974474	155.4	-0.1373016	155.4	-0.09333707	155.4	-0.1423206	155.4	-0.103657	155.4	-0.1059678	155.4	-0.2738458	155.4	-0.258755	155.4	-0.3216067	155.4	-0.2816373	155.4	-0.2649933	155.4	-0.2777496	155.4	-0.2652488	155.4	-0.2321216	155.4	-0.2591033
155.6	-0.1333145	155.6	-0.1945173	155.6	-0.1321102	155.6	-0.08911749	155.6	-0.1343537	155.6	-0.1006212	155.6	-0.1045808	155.6	-0.2738645	155.6	-0.2587129	155.6	-0.324753	155.6	-0.284325	155.6	-0.261678	155.6	-0.2740719	155.6	-0.2665729	155.6	-0.2307525	155.6	-0.2541533
155.8	-0.1325181	155.8	-0.1799417	155.8	-0.1196131	155.8	-0.08048072	155.8	-0.1251139	155.8	-0.09131926	155.8	-0.09684013	155.8	-0.2768504	155.8	-0.2629627	155.8	-0.3274387	155.8	-0.2792611	155.8	-0.2644669	155.8	-0.276931	155.8	-0.2703927	155.8	-0.2342958	155.8	-0.2578197
156	-0.121955	156	-0.1726547	156	-0.115822	156	-0.07143541	156	-0.1182213	156	-0.07964426	156	-0.08575289	156	-0.2739825	156	-0.2672217	156	-0.3234756	156	-0.2772471	156	-0.2616841	156	-0.2757483	156	-0.2661403	156	-0.235247	156	-0.2542604
156.2	-0.1141602	156.2	-0.1674001	156.2	-0.109433	156.2	-0.06521789	156.2	-0.1119351	156.2	-0.07557847	156.2	-0.08193143	156.2	-0.2716415	156.2	-0.2628211	156.2	-0.3244961	156.2	-0.2787841	156.2	-0.2618274	156.2	-0.2762841	156.2	-0.2697058	156.2	-0.2309121	156.2	-0.2634677
156.4	-0.1091392	156.4	-0.1629991	156.4	-0.1014127	156.4	-0.05816305	156.4	-0.1056175	156.4	-0.06748474	156.4	-0.0724453	156.4	-0.2695802	156.4	-0.261792	156.4	-0.3280003	156.4	-0.2788416	156.4	-0.2636174	156.4	-0.275764	156.4	-0.2683046	156.4	-0.2295986	156.4	-0.2538863
156.6	-0.1030013	156.6	-0.1542579	156.6	-0.0895376	156.6	-0.05136241	156.6	-0.09603789	156.6	-0.06292373	156.6	-0.0614571	156.6	-0.2740766	156.6	-0.2574502	156.6	-0.3248388	156.6	-0.2797822	156.6	-0.2614646	156.6	-0.2748782	156.6	-0.2645133	156.6	-0.2287469	156.6	-0.2561043
156.8	-0.0936973	156.8	-0.1460622	156.8	-0.08716308	156.8	-0.03881264	156.8	-0.09091653	156.8	-0.05741714	156.8	-0.05554087	156.8	-0.2733333	156.8	-0.264218	156.8	-0.3229704	156.8	-0.2805218	156.8	-0.2602707	156.8	-0.2726868	156.8	-0.2610023	156.8	-0.2332392	156.8	-0.2570681
157	-0.08177514	157	-0.1370494	157	-0.0793732	157	-0.03977269	157	-0.08161335	157	-0.04835422	157	-0.04580059	157	-0.2756779	157	-0.2652137	157	-0.3195232	157	-0.2737488	157	-0.2601407	157	-0.2712594	157	-0.2614501	157	-0.2246044	157	-0.2491472
157.2	-0.08067187	157.2	-0.1326173	157.2	-0.06956481	157.2	-0.03061205	157.2	-0.07392786	157.2	-0.04036661	157.2	-0.04662484	157.2	-0.2769656	157.2	-0.2580403	157.2	-0.3209321	157.2	-0.2782257	157.2	-0.2614706	157.2	-0.2772677	157.2	-0.2661624	157.2	-0.2307244	157.2	-0.2524674
157.4	-0.07089315	157.4	-0.122784	157.4	-0.06494091	157.4	-0.02145412	157.4	-0.06809122	157.4	-0.03419296	157.4	-0.03294635	157.4	-0.2725737	157.4	-0.2613899	157.4	-0.3260741	157.4	-0.2789742	157.4	-0.2587085	157.4	-0.2724705	157.4	-0.2629984	157.4	-0.227601	157.4	-0.2597586
157.6	-0.06808148	157.6	-0.1150693	157.6	-0.05524351	157.6	-0.01583271	157.6	-0.06188058	157.6	-0.03059186	157.6	-0.03280976	157.6	-0.2717714	157.6	-0.2560265	157.6	-0.3208895	157.6	-0.2771623	157.6	-0.2602563	157.6	-0.2720678	157.6	-0.2622057	157.6	-0.2298287	157.6	-0.2586991
157.8	-0.05750397	157.8	-0.1086995	157.8	-0.05038267	157.8	-0.00697016	157.8	-0.05065271	157.8	-0.01852206	157.8	-0.01982769	157.8	-0.270316	157.8	-0.2608973	157.8	-0.3228902	157.8	-0.2771856	157.8	-0.262522	157.8	-0.272336	157.8	-0.2642293	157.8	-0.2292053	157.8	-0.2547447
158	-0.04715815	158	-0.1029679	158	-0.0425465	158	-0.00359391	158	-0.04658862	158	-0.01573947	158	-0.00811037	158	-0.2690003	158	-0.2622859	158	-0.3234784	158	-0.2766627	158	-0.260809	158	-0.2709816	158	-0.2649623	158	-0.2265274	158	-0.2579485
158.2	-0.04101615	158.2	-0.09528627	158.2	-0.03313376	158.2	0.00581364	158.2	-0.04082352	158.2	-0.00537615	158.2	-0.00573676	158.2	-0.2688666	158.2	-0.2578591	158.2	-0.3219327	158.2	-0.276165	158.2	-0.2557515	158.2	-0.2677288	158.2	-0.2623738	158.2	-0.2267471	158.2	-0.2502094
158.4	-0.03724188	158.4	-0.08464853	158.4	-0.02751566	158.4	0.01053811	158.4	-0.03280439	158.4	0.0003605	158.4	-0.0010658	158.4	-0.2726567	158.4	-0.256797	158.4	-0.3215688	158.4	-0.2696068	158.4	-0.2580221	158.4	-0.2733843	158.4	-0.2632322	158.4	-0.2291793	158.4	-0.2526615
158.6	-0.03044836	158.6	-0.08145755	158.6	-0.02047556	158.6	0.01542182	158.6	-0.02226122	158.6	0.00622097	158.6	0.00307095	158.6	-0.2728143	158.6	-0.2559794	158.6	-0.3202198	158.6	-0.2767721	158.6	-0.2593235	158.6	-0.2705539	158.6	-0.262624	158.6	-0.22774	158.6	-0.2545964
158.8	-0.01559701	158.8	-0.0752402	158.8	-0.01331664	158.8	0.02482749	158.8	-0.01863156	158.8	0.01013064	158.8	0.00918053	158.8	-0.2719758	158.8	-0.2572673	158.8	-0.3210467	158.8	-0.2739892	158.8	-0.2571214	158.8	-0.2683637	158.8	-0.2633598	158.8	-0.2286854	158.8	-0.2523677
159	-0.01673963	159	-0.06731509	159	-0.00852617	159	0.03242338	159	-0.01280448	159	0.02434777	159	0.02051164	159	-0.2686165	159	-0.2545076	159	-0.319136	159	-0.275182	159	-0.2618327	159	-0.2688213	159	-0.2604356	159	-0.2255487	159	-0.2522632
159.2	-0.00797199	159.2	-0.06044976	159.2	-0.00092187	159.2	0.03497718	159.2	-0.00758443	159.2	0.02985468	159.2	0.02862403	159.2	-0.2672839	159.2	-0.2571731	159.2	-0.3184325	159.2	-0.274086	159.2	-0.25618	159.2	-0.2715389	159.2	-0.2631302	159.2	-0.2294674	159.2	-0.253909
159.4	-0.00512846	159.4	-0.0533208	159.4	0.00665503	159.4	0.04864594	159.4	-0.00035158	159.4	0.03374638	159.4	0.03298327	159.4	-0.268899	159.4	-0.2565435	159.4	-0.3167805	159.4	-0.2731573	159.4	-0.256129	159.4	-0.2679018	159.4	-0.2629623	159.4	-0.2258772	159.4	-0.2516173
159.6	0.00718911	159.6	-0.04308892	159.6	0.01369119	159.6	0.04961563	159.6	0.01239671	159.6	0.03967331	159.6	0.04220553	159.6	-0.2675035	159.6	-0.257254	159.6	-0.316551	159.6	-0.2750122	159.6	-0.2588829	159.6	-0.2713223	159.6	-0.2608949	159.6	-0.2286001	159.6	-0.2507898
159.8	0.01446776	159.8	-0.0388348	159.8	0.01897601	159.8	0.05941071	159.8	0.01326373	159.8	0.04863945	159.8	0.04612651	159.8	-0.2697656	159.8	-0.255103	159.8	-0.3204667	159.8	-0.2732014	159.8	-0.2533158	159.8	-0.2701097	159.8	-0.2624046	159.8	-0.2284474	159.8	-0.2503385
160	0.01769286	160	-0.03685602	160	0.02442061	160	0.06884261	160	0.02404627	160	0.06046102	160	0.05276871	160	-0.2732026	160	-0.2530368	160	-0.3201767	160	-0.2720315	160	-0.2576773	160	-0.2713596	160	-0.2595049	160	-0.2309672	160	-0.2525777
160.2	0.02435303	160.2	-0.0269542	160.2	0.02797842	160.2	0.07332579	160.2	0.03090758	160.2	0.06047765	160.2	0.05998667	160.2	-0.2712892	160.2	-0.254976	160.2	-0.3117729	160.2	-0.2679737	160.2	-0.2593314	160.2	-0.2673314	160.2	-0.2612854	160.2	-0.2235502	160.2	-0.2557519
160.4	0.02700915	160.4	-0.01702798	160.4	0.04033503	160.4	0.07946889	160.4	0.03330643	160.4	0.06691535	160.4	0.06776336	160.4	-0.2700943	160.4	-0.253614	160.4	-0.3177978	160.4	-0.2726329	160.4	-0.2573557	160.4	-0.2689951	160.4	-0.2606935	160.4	-0.2308098	160.4	-0.2515594
160.6	0.03992974	160.6	-0.01816302	160.6	0.04560007	160.6	0.08323859	160.6	0.04128527	160.6	0.07448414	160.6	0.06766492	160.6	-0.267632	160.6	-0.2542169	160.6	-0.3150955	160.6	-0.2721509	160.6	-0.2571833	160.6	-0.2693914	160.6	-0.2606224	160.6	-0.2246236	160.6	-0.251442
160.8	0.04682447	160.8	-0.00577814	160.8	0.04739991	160.8	0.08991156	160.8	0.04650692	160.8	0.08245721	160.8	0.08026366	160.8	-0.2711766	160.8	-0.2552304	160.8	-0.3166429	160.8	-0.2760505	160.8	-0.2569076	160.8	-0.2678848	160.8	-0.2590283	160.8	-0.2292269	160.8	-0.2489321
161	0.05377715	161	0.00223341	161	0.05761789	161	0.1001517	161	0.05135887	161	0.09241848	161	0.08810204	161	-0.2718998	161	-0.2592698	161	-0.3164434	161	-0.2706252	161	-0.2555076	161	-0.2669857	161	-0.2611725	161	-0.2222182	161	-0.2497099
161.2	0.05905765	161.2	0.01212477	161.2	0.06496212	161.2	0.1024895	161.2	0.06221333	161.2	0.08994111	161.2	0.09187564	161.2	-0.2611757	161.2	-0.255887	161.2	-0.3146546	161.2	-0.2700861	161.2	-0.2536229	161.2	-0.2692167	161.2	-0.2586348	161.2	-0.2256587	161.2	-0.2526534
161.4	0.06651419	161.4	0.0105309	161.4	0.07134192	161.4	0.1040076	161.4	0.06281298	161.4	0.1005212	161.4	0.09702861	161.4	-0.2680137	161.4	-0.2559206	161.4	-0.3193412	161.4	-0.2718011	161.4	-0.2540767	161.4	-0.2666979	161.4	-0.257248	161.4	-0.2207951	161.4	-0.248754
161.6	0.06969634	161.6	0.02028441	161.6	0.07695167	161.6	0.1193222	161.6	0.07343046	161.6	0.1057695	161.6	0.1072527	161.6	-0.2656982	161.6	-0.2529448	161.6	-0.3110424	161.6	-0.2754924	161.6	-0.2563674	161.6	-0.2630681	161.6	-0.2614976	161.6	-0.2259041	161.6	-0.2463343
161.8	0.07705065	161.8	0.02890363	161.8	0.08290708	161.8	0.1208243	161.8	0.07469539	161.8	0.1156861	161.8	0.1082426	161.8	-0.2652024	161.8	-0.2513983	161.8	-0.3147973	161.8	-0.2684989	161.8	-0.2512905	161.8	-0.2669366	161.8	-0.2604867	161.8	-0.2210052	161.8	-0.2526521
162	0.08168145	162	0.02632003	162	0.09457976	162	0.1282564	162	0.08296923	162	0.1154168	162	0.1131503	162	-0.2670896	162	-0.2530684	162	-0.3188315	162	-0.267121	162	-0.2557787	162	-0.2647693	162	-0.2550386	162	-0.223723	162	-0.2498366
162.2	0.08673653	162.2	0.03053273	162.2	0.09561858	162.2	0.1369975	162.2	0.09422076	162.2	0.1261943	162.2	0.1212475	162.2	-0.264084	162.2	-0.2541802	162.2	-0.3175888	162.2	-0.2720933	162.2	-0.2499221	162.2	-0.2668833	162.2	-0.2580603	162.2	-0.2247493	162.2	-0.2501777
162.4	0.09481009	162.4	0.0453337	162.4	0.10563	162.4	0.1382965	162.4	0.09856699	162.4	0.1296141	162.4	0.1271873	162.4	-0.266173	162.4	-0.2496425	162.4	-0.314812	162.4	-0.2664519	162.4	-0.2587698	162.4	-0.2644722	162.4	-0.2570102	162.4	-0.2192943	162.4	-0.2519389
162.6	0.09817737	162.6	0.05082019	162.6	0.1074185	162.6	0.1434107	162.6	0.100326	162.6	0.137084	162.6	0.1400425	162.6	-0.2664416	162.6	-0.2528425	162.6	-0.3151936	162.6	-0.2708539	162.6	-0.2513503	162.6	-0.2645284	162.6	-0.2567683	162.6	-0.2232256	162.6	-0.2501018
162.8	0.1028807	162.8	0.05721534	162.8	0.1100743	162.8	0.1539629	162.8	0.1083606	162.8	0.1425758	162.8	0.1405268	162.8	-0.2592863	162.8	-0.2543937	162.8	-0.3125528	162.8	-0.266546	162.8	-0.2515859	162.8	-0.264717	162.8	-0.2527571	162.8	-0.2205574	162.8	-0.2502663
163	0.1080631	163	0.06356548	163	0.123388	163	0.1604971	163	0.1144616	163	0.150645	163	0.1471033	163	-0.2673042	163	-0.2558183	163	-0.3146558	163	-0.2700471	163	-0.2504618	163	-0.2653987	163	-0.2526163	163	-0.2250849	163	-0.2420086
163.2	0.1162594	163.2	0.06692287	163.2	0.1248106	163.2	0.1627027	163.2	0.1234719	163.2	0.1526315	163.2	0.1544336	163.2	-0.2639439	163.2	-0.2530632	163.2	-0.3118743	163.2	-0.2684509	163.2	-0.2519446	163.2	-0.2633277	163.2	-0.2580137	163.2	-0.2205183	163.2	-0.2490909
163.4	0.1223276	163.4	0.07526845	163.4	0.1279135	163.4	0.1769668	163.4	0.1278626	163.4	0.158667	163.4	0.1553108	163.4	-0.2658534	163.4	-0.2545823	163.4	-0.3183814	163.4	-0.2701218	163.4	-0.2538614	163.4	-0.2692077	163.4	-0.2573473	163.4	-0.2205398	163.4	-0.2455205
163.6	0.132247	163.6	0.08344809	163.6	0.1427615	163.6	0.1741573	163.6	0.1328055	163.6	0.1664478	163.6	0.1689483	163.6	-0.269872	163.6	-0.249061	163.6	-0.3131366	163.6	-0.2718032	163.6	-0.2493874	163.6	-0.2659816	163.6	-0.25563	163.6	-0.2259477	163.6	-0.244848
163.8	0.1339885	163.8	0.08386694	163.8	0.1436306	163.8	0.1830794	163.8	0.1360205	163.8	0.1682476	163.8	0.1729296	163.8	-0.2650432	163.8	-0.2545004	163.8	-0.3110643	163.8	-0.2659623	163.8	-0.2495664	163.8	-0.2630963	163.8	-0.2574595	163.8	-0.2218969	163.8	-0.2496312
164	0.1404198	164	0.08990955	164	0.1471559	164	0.1887846	164	0.1496478	164	0.1759738	164	0.1797901	164	-0.2646846	164	-0.2520993	164	-0.3135473	164	-0.2685625	164	-0.2557472	164	-0.2598912	164	-0.2554185	164	-0.217006	164	-0.2477003
164.2	0.1494038	164.2	0.1023415	164.2	0.1564016	164.2	0.194499	164.2	0.1483952	164.2	0.1843794	164.2	0.1823834	164.2	-0.2648759	164.2	-0.2516829	164.2	-0.3158843	164.2	-0.2683589	164.2	-0.2465169	164.2	-0.267713	164.2	-0.2559593	164.2	-0.219392	164.2	-0.2454361
164.4	0.1550876	164.4	0.1046176	164.4	0.1621964	164.4	0.2004157	164.4	0.1552352	164.4	0.1923842	164.4	0.1878178	164.4	-0.2637053	164.4	-0.2447527	164.4	-0.3136309	164.4	-0.266019	164.4	-0.2507248	164.4	-0.265827	164.4	-0.2543804	164.4	-0.2176469	164.4	-0.2489201
164.6	0.1585895	164.6	0.1119065	164.6	0.1697763	164.6	0.2042842	164.6	0.1636217	164.6	0.1912877	164.6	0.1951252	164.6	-0.2634893	164.6	-0.2483379	164.6	-0.3127077	164.6	-0.2669992	164.6	-0.2499238	164.6	-0.2617489	164.6	-0.2533371	164.6	-0.2231316	164.6	-0.2481787
164.8	0.1619138	164.8	0.1188051	164.8	0.1727408	164.8	0.2098212	164.8	0.1680234	164.8	0.1975769	164.8	0.2009748	164.8	-0.2638719	164.8	-0.2506369	164.8	-0.3159665	164.8	-0.2662375	164.8	-0.2525246	164.8	-0.2620865	164.8	-0.2539554	164.8	-0.2167118	164.8	-0.2428301
165	0.1642014	165	0.1185095	165	0.1769231	165	0.216815	165	0.1718584	165	0.2073354	165	0.2081799	165	-0.2592235	165	-0.2503097	165	-0.312036	165	-0.2683769	165	-0.2464264	165	-0.2592945	165	-0.2575466	165	-0.2179439	165	-0.2459271
165.2	0.1716561	165.2	0.1247571	165.2	0.1839205	165.2	0.218853	165.2	0.1817181	165.2	0.2143597	165.2	0.2058123	165.2	-0.2647188	165.2	-0.2495606	165.2	-0.3120986	165.2	-0.2681088	165.2	-0.2456744	165.2	-0.2641204	165.2	-0.2571463	165.2	-0.2154297	165.2	-0.2471061
165.4	0.1762438	165.4	0.130441	165.4	0.1897996	165.4	0.2298795	165.4	0.1829251	165.4	0.2144222	165.4	0.2161953	165.4	-0.2616865	165.4	-0.2516372	165.4	-0.3104443	165.4	-0.264719	165.4	-0.2498935	165.4	-0.2592418	165.4	-0.2528105	165.4	-0.2118936	165.4	-0.2482344
165.6	0.1850523	165.6	0.1354042	165.6	0.1939178	165.6	0.2319108	165.6	0.1905237	165.6	0.2231362	165.6	0.2203811	165.6	-0.2612014	165.6	-0.2476657	165.6	-0.3124465	165.6	-0.2642348	165.6	-0.2461462	165.6	-0.2608832	165.6	-0.2498304	165.6	-0.2217891	165.6	-0.2446856
165.8	0.190823	165.8	0.1431957	165.8	0.2016187	165.8	0.240521	165.8	0.1967664	165.8	0.2250407	165.8	0.2256143	165.8	-0.2629252	165.8	-0.2481691	165.8	-0.3103134	165.8	-0.2655954	165.8	-0.2496337	165.8	-0.257683	165.8	-0.2530592	165.8	-0.218218	165.8	-0.2442137
166	0.1918119	166	0.1484187	166	0.2016696	166	0.2445956	166	0.1993086	166	0.2355519	166	0.2328516	166	-0.261976	166	-0.2516225	166	-0.3117291	166	-0.265857	166	-0.2504106	166	-0.2595946	166	-0.2561277	166	-0.2202611	166	-0.2426099
166.2	0.2046236	166.2	0.1534323	166.2	0.2057384	166.2	0.2480178	166.2	0.202698	166.2	0.2368046	166.2	0.2372191	166.2	-0.2602056	166.2	-0.2501611	166.2	-0.3093162	166.2	-0.2686302	166.2	-0.2457267	166.2	-0.2611482	166.2	-0.2500981	166.2	-0.2174817	166.2	-0.242774
166.4	0.2047461	166.4	0.1611112	166.4	0.2149735	166.4	0.2511705	166.4	0.2079772	166.4	0.2419838	166.4	0.2437173	166.4	-0.2595917	166.4	-0.250803	166.4	-0.3103701	166.4	-0.2637694	166.4	-0.2515794	166.4	-0.262596	166.4	-0.2523887	166.4	-0.2133972	166.4	-0.248541
166.6	0.2112461	166.6	0.16528	166.6	0.2234398	166.6	0.2603388	166.6	0.215033	166.6	0.2480685	166.6	0.2466691	166.6	-0.2592646	166.6	-0.2478087	166.6	-0.3106621	166.6	-0.2633212	166.6	-0.2491743	166.6	-0.2542332	166.6	-0.2492501	166.6	-0.2167875	166.6	-0.2443216
166.8	0.2114457	166.8	0.1691068	166.8	0.2254717	166.8	0.2617932	166.8	0.2209004	166.8	0.2522578	166.8	0.2478376	166.8	-0.2595946	166.8	-0.2504616	166.8	-0.3082911	166.8	-0.2658142	166.8	-0.2519629	166.8	-0.2594913	166.8	-0.2487646	166.8	-0.2180898	166.8	-0.2455997
167	0.2193545	167	0.1720022	167	0.2307595	167	0.2672078	167	0.2269286	167	0.2545666	167	0.2557	167	-0.264433	167	-0.2506019	167	-0.3065157	167	-0.2648363	167	-0.2470613	167	-0.2567443	167	-0.2525512	167	-0.2193042	167	-0.2448776
167.2	0.2192127	167.2	0.1792984	167.2	0.2354974	167.2	0.2758643	167.2	0.2294345	167.2	0.2602786	167.2	0.2600317	167.2	-0.2594123	167.2	-0.2510346	167.2	-0.3119794	167.2	-0.2665997	167.2	-0.2474706	167.2	-0.2645364	167.2	-0.2542139	167.2	-0.2108265	167.2	-0.2393679
167.4	0.2290102	167.4	0.1878135	167.4	0.2378026	167.4	0.279719	167.4	0.231109	167.4	0.2699147	167.4	0.270538	167.4	-0.264798	167.4	-0.2475402	167.4	-0.308551	167.4	-0.2629469	167.4	-0.2453199	167.4	-0.2599099	167.4	-0.2511931	167.4	-0.217901	167.4	-0.2391411
167.6	0.2377202	167.6	0.1887387	167.6	0.2472887	167.6	0.2806166	167.6	0.2406297	167.6	0.2748051	167.6	0.2769902	167.6	-0.2612026	167.6	-0.2458307	167.6	-0.3099424	167.6	-0.2627408	167.6	-0.2409186	167.6	-0.2627346	167.6	-0.246982	167.6	-0.214926	167.6	-0.2399271
167.8	0.2366755	167.8	0.1928416	167.8	0.2475173	167.8	0.2859653	167.8	0.247663	167.8	0.280356	167.8	0.2754484	167.8	-0.2606175	167.8	-0.2444347	167.8	-0.3070633	167.8	-0.2623565	167.8	-0.2419955	167.8	-0.258944	167.8	-0.2523769	167.8	-0.217405	167.8	-0.2442167
168	0.2442078	168	0.1975896	168	0.2534681	168	0.2896076	168	0.2521054	168	0.2826727	168	0.2834543	168	-0.2585979	168	-0.2441382	168	-0.3115251	168	-0.2646568	168	-0.2496013	168	-0.2594618	168	-0.2503574	168	-0.2167701	168	-0.2426852
168.2	0.2514023	168.2	0.2048927	168.2	0.259694	168.2	0.2955691	168.2	0.2561775	168.2	0.2859291	168.2	0.2847827	168.2	-0.2622376	168.2	-0.2450324	168.2	-0.3080513	168.2	-0.2638294	168.2	-0.2479651	168.2	-0.2597412	168.2	-0.2477217	168.2	-0.2154109	168.2	-0.2440564
168.4	0.2548055	168.4	0.211771	168.4	0.2666219	168.4	0.2991208	168.4	0.2566687	168.4	0.2929755	168.4	0.2922801	168.4	-0.265419	168.4	-0.245232	168.4	-0.3086347	168.4	-0.2618844	168.4	-0.2451634	168.4	-0.2609282	168.4	-0.2486934	168.4	-0.213207	168.4	-0.2412295
168.6	0.2630237	168.6	0.2146588	168.6	0.2711675	168.6	0.3103725	168.6	0.2677244	168.6	0.2937827	168.6	0.296025	168.6	-0.2612601	168.6	-0.2449981	168.6	-0.3048036	168.6	-0.2643853	168.6	-0.247849	168.6	-0.2559029	168.6	-0.2466949	168.6	-0.2132936	168.6	-0.2436972
168.8	0.2643981	168.8	0.2220834	168.8	0.2740857	168.8	0.3130283	168.8	0.2680935	168.8	0.2984407	168.8	0.3049323	168.8	-0.2631661	168.8	-0.2405382	168.8	-0.3070638	168.8	-0.2598879	168.8	-0.2480769	168.8	-0.256773	168.8	-0.2453838	168.8	-0.2140868	168.8	-0.2443005
169	0.2674042	169	0.2222989	169	0.2788512	169	0.316201	169	0.2747467	169	0.3092606	169	0.3038594	169	-0.2621702	169	-0.2418197	169	-0.3047443	169	-0.2610157	169	-0.2504767	169	-0.2593091	169	-0.2535713	169	-0.2124631	169	-0.2396616
169.2	0.2740775	169.2	0.2259383	169.2	0.2808194	169.2	0.320183	169.2	0.2812373	169.2	0.3081126	169.2	0.310069	169.2	-0.2599538	169.2	-0.2427143	169.2	-0.3069343	169.2	-0.2632138	169.2	-0.2488927	169.2	-0.2563236	169.2	-0.2481768	169.2	-0.2127592	169.2	-0.2419119
169.4	0.2781706	169.4	0.2349803	169.4	0.2856038	169.4	0.3284712	169.4	0.283026	169.4	0.316727	169.4	0.3206276	169.4	-0.2591307	169.4	-0.2421642	169.4	-0.3075025	169.4	-0.2624329	169.4	-0.2442388	169.4	-0.2592888	169.4	-0.2507027	169.4	-0.2149768	169.4	-0.244377
169.6	0.2837562	169.6	0.2392426	169.6	0.2926685	169.6	0.3284304	169.6	0.2864918	169.6	0.3191025	169.6	0.3253992	169.6	-0.2609041	169.6	-0.2439006	169.6	-0.3070625	169.6	-0.2656592	169.6	-0.2419158	169.6	-0.2605832	169.6	-0.2482982	169.6	-0.2118762	169.6	-0.2440719
169.8	0.2853526	169.8	0.2437614	169.8	0.2980424	169.8	0.3312639	169.8	0.2956603	169.8	0.3225505	169.8	0.3293134	169.8	-0.2582201	169.8	-0.2443435	169.8	-0.3136523	169.8	-0.2617261	169.8	-0.2436393	169.8	-0.2543655	169.8	-0.2451232	169.8	-0.2172339	169.8	-0.2397531
170	0.2926869	170	0.2469116	170	0.3071774	170	0.3395832	170	0.2994861	170	0.3282883	170	0.333997	170	-0.259553	170	-0.2416363	170	-0.3073226	170	-0.2602587	170	-0.2459899	170	-0.2560072	170	-0.247514	170	-0.2132823	170	-0.2421426
170.2	0.3013825	170.2	0.2486698	170.2	0.3106843	170.2	0.3456858	170.2	0.2989016	170.2	0.3331821	170.2	0.3351157	170.2	-0.2554878	170.2	-0.2456664	170.2	-0.3085108	170.2	-0.2615171	170.2	-0.2433676	170.2	-0.257454	170.2	-0.2459747	170.2	-0.2116187	170.2	-0.2401334
170.4	0.3029136	170.4	0.2548526	170.4	0.3106676	170.4	0.3497554	170.4	0.3029633	170.4	0.340544	170.4	0.3369437	170.4	-0.254831	170.4	-0.2391286	170.4	-0.3058674	170.4	-0.262497	170.4	-0.2409677	170.4	-0.2566129	170.4	-0.2427101	170.4	-0.2122261	170.4	-0.2387971
170.6	0.3081074	170.6	0.2621464	170.6	0.3163779	170.6	0.3509151	170.6	0.3056379	170.6	0.3409437	170.6	0.3430088	170.6	-0.2576191	170.6	-0.2408607	170.6	-0.3080773	170.6	-0.2630841	170.6	-0.2413227	170.6	-0.2539291	170.6	-0.2433041	170.6	-0.2142999	170.6	-0.2357735
170.8	0.309123	170.8	0.2638303	170.8	0.3171754	170.8	0.3560958	170.8	0.3135245	170.8	0.3432643	170.8	0.3482672	170.8	-0.260326	170.8	-0.2444981	170.8	-0.3031841	170.8	-0.2590997	170.8	-0.239428	170.8	-0.2562557	170.8	-0.2463392	170.8	-0.2090797	170.8	-0.2362158
171	0.3169908	171	0.2683779	171	0.3195742	171	0.362731	171	0.3198434	171	0.3477516	171	0.3551328	171	-0.2559149	171	-0.2450384	171	-0.3030655	171	-0.260964	171	-0.2442551	171	-0.2520511	171	-0.2453198	171	-0.2148816	171	-0.2429218
171.2	0.3156902	171.2	0.2699009	171.2	0.3241969	171.2	0.3622654	171.2	0.322513	171.2	0.3548038	171.2	0.3572307	171.2	-0.2531648	171.2	-0.2421109	171.2	-0.3014489	171.2	-0.2599238	171.2	-0.2392567	171.2	-0.2540788	171.2	-0.2513157	171.2	-0.2119379	171.2	-0.237903
171.4	0.3169855	171.4	0.2792624	171.4	0.3333151	171.4	0.3723651	171.4	0.3275799	171.4	0.3593979	171.4	0.3616522	171.4	-0.2606094	171.4	-0.2409119	171.4	-0.3037322	171.4	-0.264215	171.4	-0.2488548	171.4	-0.2534581	171.4	-0.2468509	171.4	-0.2136358	171.4	-0.2406191
171.6	0.3314111	171.6	0.2794212	171.6	0.3347742	171.6	0.3744742	171.6	0.3309712	171.6	0.3639099	171.6	0.3629634	171.6	-0.2556844	171.6	-0.2410204	171.6	-0.3049789	171.6	-0.2608016	171.6	-0.2452666	171.6	-0.2525518	171.6	-0.2468309	171.6	-0.2083887	171.6	-0.2412623
171.8	0.3255445	171.8	0.2856708	171.8	0.3422327	171.8	0.3756557	171.8	0.3379252	171.8	0.3668535	171.8	0.3661343	171.8	-0.2551529	171.8	-0.2380697	171.8	-0.3051125	171.8	-0.2564942	171.8	-0.2448067	171.8	-0.254315	171.8	-0.2444163	171.8	-0.2135696	171.8	-0.2403462
172	0.3360909	172	0.2928348	172	0.3464612	172	0.3825219	172	0.3413808	172	0.3715228	172	0.3705709	172	-0.2564535	172	-0.2390865	172	-0.3004635	172	-0.2572043	172	-0.2422531	172	-0.2594369	172	-0.2444956	172	-0.2120889	172	-0.2369307
172.2	0.3362189	172.2	0.2939638	172.2	0.3478176	172.2	0.391405	172.2	0.3448982	172.2	0.3746569	172.2	0.3735088	172.2	-0.2499845	172.2	-0.2380387	172.2	-0.3038523	172.2	-0.2572801	172.2	-0.2436393	172.2	-0.2518176	172.2	-0.2471207	172.2	-0.2081698	172.2	-0.2360778
172.4	0.3419724	172.4	0.3026569	172.4	0.3517857	172.4	0.3861545	172.4	0.3512985	172.4	0.3801865	172.4	0.3870456	172.4	-0.2535507	172.4	-0.2404668	172.4	-0.3067412	172.4	-0.2644591	172.4	-0.2427528	172.4	-0.2546789	172.4	-0.2492143	172.4	-0.2097708	172.4	-0.2342662
172.6	0.3437166	172.6	0.3068058	172.6	0.3589799	172.6	0.3931042	172.6	0.3600146	172.6	0.3849482	172.6	0.3855753	172.6	-0.2542976	172.6	-0.240743	172.6	-0.300417	172.6	-0.2572688	172.6	-0.2395103	172.6	-0.2478728	172.6	-0.2445366	172.6	-0.2082651	172.6	-0.2347326
172.8	0.3453819	172.8	0.3073479	172.8	0.3612973	172.8	0.3974896	172.8	0.3569219	172.8	0.3866022	172.8	0.394327	172.8	-0.2533309	172.8	-0.2415616	172.8	-0.3003786	172.8	-0.2585761	172.8	-0.2384711	172.8	-0.2556511	172.8	-0.2454103	172.8	-0.2109867	172.8	-0.2350631
173	0.3513934	173	0.3142185	173	0.3649422	173	0.4049038	173	0.3640852	173	0.3913176	173	0.391903	173	-0.2559678	173	-0.2456582	173	-0.2955837	173	-0.2573918	173	-0.2391008	173	-0.2528505	173	-0.241227	173	-0.2060688	173	-0.2377491
173.2	0.3573305	173.2	0.3172977	173.2	0.3686042	173.2	0.4050985	173.2	0.362753	173.2	0.3912221	173.2	0.4002261	173.2	-0.2521994	173.2	-0.2329012	173.2	-0.3011429	173.2	-0.2595662	173.2	-0.2411277	173.2	-0.2512529	173.2	-0.2465438	173.2	-0.2067066	173.2	-0.2359024
173.4	0.3621728	173.4	0.3180082	173.4	0.3777267	173.4	0.4113235	173.4	0.370546	173.4	0.402067	173.4	0.4027353	173.4	-0.2535868	173.4	-0.2394982	173.4	-0.3018419	173.4	-0.257148	173.4	-0.2407959	173.4	-0.2561122	173.4	-0.2393179	173.4	-0.2091621	173.4	-0.2414186
173.6	0.3670709	173.6	0.3246734	173.6	0.3734003	173.6	0.4124882	173.6	0.3741619	173.6	0.4003493	173.6	0.4115276	173.6	-0.2544518	173.62	-0.2401962	173.62	-0.2974253	173.62	-0.2513959	173.62	-0.2416125	173.62	-0.2517865	173.62	-0.2425014	173.62	-0.2086843	173.62	-0.2373834
173.8	0.3712563	173.8	0.3252764	173.8	0.3806078	173.8	0.4149328	173.8	0.3756334	173.8	0.4059468	173.8	0.4118174	173.8	-0.248635	173.8	-0.2378828	173.8	-0.2996078	173.8	-0.2558637	173.8	-0.2360489	173.8	-0.252383	173.8	-0.2439895	173.8	-0.2069501	173.8	-0.2359558
174	0.3729251	174	0.3282258	174	0.3857994	174	0.4172892	174	0.3779145	174	0.4126078	174	0.4153548	174	-0.252605	174	-0.2411279	174	-0.3008817	174	-0.2566783	174	-0.2374344	174	-0.2547708	174	-0.2461357	174	-0.2096519	174	-0.2358858
174.2	0.3784597	174.2	0.3336514	174.2	0.3886389	174.2	0.4260685	174.2	0.3850154	174.2	0.4168154	174.2	0.4165483	174.2	-0.2519701	174.2	-0.234821	174.2	-0.297832	174.2	-0.2579826	174.2	-0.2403751	174.2	-0.2476169	174.2	-0.2381171	174.2	-0.2072137	174.2	-0.2353889
174.4	0.3814917	174.4	0.3335661	174.4	0.3966023	174.4	0.43241	174.4	0.3861758	174.4	0.4160631	174.4	0.4233741	174.4	-0.2535636	174.4	-0.2400757	174.4	-0.3032994	174.4	-0.2580828	174.4	-0.240328	174.4	-0.2530588	174.4	-0.2435664	174.4	-0.2063636	174.4	-0.2369609
174.6	0.3852683	174.6	0.3469351	174.6	0.3946855	174.6	0.4336111	174.6	0.3929457	174.6	0.4246304	174.6	0.423712	174.6	-0.2542848	174.6	-0.2372818	174.6	-0.2995817	174.6	-0.258075	174.6	-0.2395598	174.6	-0.2470133	174.6	-0.2390402	174.6	-0.2090663	174.6	-0.2351299
174.8	0.3890583	174.8	0.3438062	174.8	0.3970412	174.8	0.4362138	174.8	0.3957038	174.8	0.4217503	174.8	0.4283718	174.8	-0.2534851	174.8	-0.2355239	174.8	-0.304359	174.8	-0.2528993	174.8	-0.2366215	174.8	-0.2483255	174.8	-0.2412244	174.8	-0.2098311	174.8	-0.2309737
175	0.3940691	175	0.3526886	175	0.406106	175	0.4378445	175	0.3995893	175	0.4313571	175	0.4365682	175	-0.2505031	175	-0.237402	175	-0.3045686	175	-0.2530718	175	-0.2369031	175	-0.2466991	175	-0.241492	175	-0.2076767	175	-0.2365312
175.2	0.3973774	175.2	0.354906	175.2	0.4063648	175.2	0.4408258	175.2	0.4024667	175.2	0.4340236	175.2	0.4370946	175.2	-0.2512293	175.2	-0.2368776	175.2	-0.3030746	175.2	-0.255249	175.2	-0.2360604	175.2	-0.2459293	175.2	-0.2424801	175.2	-0.2041283	175.2	-0.237265
175.4	0.397805	175.4	0.355135	175.4	0.4091837	175.4	0.4484115	175.4	0.4083869	175.4	0.4346921	175.4	0.4434052	175.4	-0.2510408	175.4	-0.2349786	175.4	-0.2992261	175.4	-0.2552239	175.4	-0.2390064	175.4	-0.2487552	175.4	-0.2426529	175.4	-0.2105884	175.4	-0.2381366
175.6	0.4008452	175.6	0.3633721	175.6	0.4102912	175.6	0.4530275	175.6	0.4085872	175.6	0.4424936	175.6	0.4386975	175.6	-0.2517158	175.6	-0.2405948	175.6	-0.3000236	175.6	-0.2525793	175.6	-0.2376523	175.6	-0.2480888	175.6	-0.2424196	175.6	-0.2056772	175.6	-0.2386807
175.8	0.4091047	175.8	0.3670144	175.8	0.417064	175.8	0.4544777	175.8	0.4113777	175.8	0.4401571	175.8	0.4519312	175.8	-0.2553071	175.8	-0.2362233	175.8	-0.2981654	175.8	-0.2527284	175.8	-0.2382877	175.8	-0.2486456	175.8	-0.2393581	175.8	-0.2075065	175.8	-0.2327177
176	0.4133632	176	0.3680609	176	0.4218612	176	0.4560568	176	0.4151527	176	0.4438951	176	0.4551987	176	-0.2479628	176	-0.2413779	176	-0.2959801	176	-0.2530575	176	-0.2447146	176	-0.2502946	176	-0.239382	176	-0.2068335	176	-0.2341012
176.2	0.4130541	176.2	0.3723425	176.2	0.4222988	176.2	0.4636479	176.2	0.41751	176.2	0.4487357	176.2	0.4581555	176.2	-0.2509928	176.2	-0.2316558	176.2	-0.2969633	176.2	-0.2573106	176.2	-0.2405082	176.2	-0.2497316	176.2	-0.2393741	176.2	-0.2052703	176.2	-0.2388791
176.4	0.4166712	176.4	0.3760375	176.4	0.4301786	176.4	0.4676259	176.4	0.4235087	176.4	0.4567958	176.4	0.4605906	176.4	-0.2483351	176.4	-0.238552	176.4	-0.298668	176.4	-0.2565955	176.4	-0.2385698	176.4	-0.2478701	176.4	-0.2397629	176.4	-0.2063459	176.4	-0.2335301
176.6	0.4177285	176.6	0.3789161	176.6	0.4311486	176.6	0.4714166	176.6	0.4294839	176.6	0.4582908	176.6	0.4637204	176.6	-0.2532577	176.6	-0.2370564	176.6	-0.2983415	176.6	-0.2545429	176.6	-0.2366467	176.6	-0.2470058	176.6	-0.2359691	176.6	-0.2060262	176.6	-0.2293949
176.8	0.4248583	176.8	0.381617	176.8	0.4366605	176.8	0.4762565	176.8	0.4255203	176.8	0.4634065	176.8	0.4672662	176.8	-0.2516415	176.8	-0.2389265	176.8	-0.3006403	176.8	-0.2522767	176.8	-0.2375389	176.8	-0.2491985	176.8	-0.2406208	176.8	-0.2002541	176.8	-0.2333369
177	0.4301334	177	0.3838519	177	0.4357676	177	0.4774532	177	0.4313486	177	0.4666992	177	0.4692183	177	-0.2502004	177	-0.2320584	177	-0.3011771	177	-0.2534614	177	-0.2362095	177	-0.2478731	177	-0.23937	177	-0.2047007	177	-0.2347435
177.2	0.4282784	177.2	0.385997	177.2	0.4437785	177.2	0.4854963	177.2	0.4302051	177.2	0.4640847	177.2	0.4751128	177.2	-0.2463294	177.2	-0.231382	177.2	-0.2961991	177.2	-0.2534857	177.2	-0.235314	177.2	-0.2485772	177.2	-0.2359405	177.2	-0.2039217	177.2	-0.2298025
177.4	0.4331834	177.4	0.3945615	177.4	0.4428197	177.4	0.4827633	177.4	0.4414753	177.4	0.4715521	177.4	0.4749537	177.4	-0.2537447	177.4	-0.2281414	177.4	-0.2988007	177.4	-0.2512518	177.4	-0.2392824	177.4	-0.2482486	177.4	-0.2447089	177.4	-0.203715	177.4	-0.2316451
177.6	0.443538	177.6	0.4013739	177.6	0.4501513	177.6	0.4793534	177.6	0.4426622	177.6	0.4719475	177.6	0.4807306	177.6	-0.2512451	177.6	-0.2375673	177.6	-0.2953685	177.6	-0.2505784	177.6	-0.235309	177.6	-0.2505375	177.6	-0.2425	177.6	-0.2077897	177.6	-0.2329012
177.8	0.4435401	177.8	0.3976516	177.8	0.4511169	177.8	0.4934064	177.8	0.44886	177.8	0.4760597	177.8	0.4872691	177.8	-0.2486726	177.8	-0.2335918	177.8	-0.2968302	177.8	-0.253638	177.8	-0.2331669	177.8	-0.2457896	177.8	-0.2412771	177.8	-0.202846	177.8	-0.2284046
178	0.4440334	178	0.4028045	178	0.452982	178	0.492853	178	0.4499709	178	0.4789852	178	0.4858647	178	-0.2477248	178	-0.2366859	178	-0.2969525	178	-0.251064	178	-0.2349331	178	-0.2455453	178	-0.2416905	178	-0.2055614	178	-0.2297211
178.2	0.4482373	178.2	0.4062794	178.2	0.4603833	178.2	0.4939971	178.2	0.453166	178.2	0.4855483	178.2	0.490382	178.2	-0.2486744	178.2	-0.2357008	178.2	-0.2964624	178.2	-0.2533935	178.2	-0.234188	178.2	-0.2438492	178.2	-0.2389029	178.2	-0.2052248	178.2	-0.2286099
178.4	0.4513643	178.4	0.4051569	178.4	0.4620593	178.4	0.4974166	178.4	0.4544998	178.4	0.484852	178.4	0.4966432	178.4	-0.2477797	178.4	-0.2303043	178.4	-0.3015981	178.4	-0.2490941	178.4	-0.2372838	178.4	-0.2434813	178.4	-0.2383919	178.4	-0.2040103	178.4	-0.234912
178.6	0.4491052	178.6	0.4151047	178.6	0.4662307	178.6	0.4973203	178.6	0.4603433	178.6	0.4900422	178.6	0.4985431	178.6	-0.2519174	178.6	-0.2341435	178.6	-0.2961029	178.6	-0.2524177	178.6	-0.2349952	178.6	-0.2486735	178.6	-0.2371696	178.6	-0.202209	178.6	-0.2339769
178.8	0.4551104	178.8	0.4209414	178.8	0.4673742	178.8	0.506202	178.8	0.4707569	178.8	0.4940084	178.8	0.501688	178.8	-0.2500708	178.8	-0.2300238	178.8	-0.29533	178.8	-0.2475953	178.8	-0.2332921	178.8	-0.2449974	178.8	-0.2403023	178.8	-0.2025832	178.8	-0.2357863
179	0.4613252	179	0.416448	179	0.4729836	179	0.5114109	179	0.4657594	179	0.4970614	179	0.5058628	179	-0.2470717	179	-0.2350685	179	-0.2918512	179	-0.255531	179	-0.2367649	179	-0.2460358	179	-0.2378599	179	-0.2007992	179	-0.2341954
179.2	0.4654027	179.2	0.4253461	179.2	0.4759705	179.2	0.5145843	179.2	0.4681489	179.2	0.4992806	179.2	0.5097065	179.2	-0.2498986	179.2	-0.2316554	179.2	-0.2933116	179.2	-0.2520872	179.2	-0.2372425	179.2	-0.2460549	179.2	-0.2388729	179.2	-0.1978278	179.2	-0.2316493
179.4	0.4636475	179.4	0.4228858	179.4	0.4802336	179.4	0.5141984	179.4	0.4739011	179.4	0.5030178	179.4	0.5096835	179.4	-0.2459746	179.4	-0.2338976	179.4	-0.295603	179.4	-0.2511767	179.4	-0.2303829	179.4	-0.2452217	179.4	-0.2376603	179.4	-0.2023507	179.4	-0.2281197
179.6	0.4717631	179.6	0.4331136	179.6	0.4824809	179.6	0.516916	179.6	0.4769005	179.6	0.5059903	179.6	0.5173659	179.6	-0.2464887	179.6	-0.2365545	179.6	-0.2974033	179.6	-0.2488888	179.6	-0.2342703	179.6	-0.2405251	179.6	-0.2387771	179.6	-0.203907	179.6	-0.2290968
179.8	0.4758058	179.8	0.4311897	179.8	0.4842325	179.8	0.5227348	179.8	0.4827543	179.8	0.5073091	179.8	0.5192926	179.8	-0.2456797	179.8	-0.2329503	179.8	-0.2969189	179.8	-0.2460926	179.8	-0.2320779	179.8	-0.2453856	179.8	-0.2414292	179.8	-0.2017259	179.8	-0.2294049
180	0.4735991	180	0.4325742	180	0.4867059	180	0.5261344	180	0.4846607	180	0.5154039	180	0.5192538	180	-0.2454026	180	-0.2290511	180	-0.2928046	180	-0.2514165	180	-0.231487	180	-0.2449694	180	-0.233445	180	-0.2039957	180	-0.2298643
180.2	0.4782611	180.2	0.4405032	180.2	0.4866922	180.2	0.5338346	180.2	0.4857033	180.2	0.5147437	180.2	0.5212743	180.2	-0.2444422	180.2	-0.2298999	180.2	-0.2944341	180.2	-0.2490726	180.2	-0.2356174	180.2	-0.2508317	180.2	-0.2372693	180.2	-0.2016027	180.2	-0.2306861
180.4	0.4825272	180.4	0.4421989	180.4	0.4917755	180.4	0.5267323	180.4	0.4885592	180.4	0.521147	180.4	0.5240267	180.4	-0.2516344	180.4	-0.2331424	180.4	-0.2941163	180.4	-0.2454862	180.4	-0.2336116	180.4	-0.2452803	180.4	-0.2352405	180.4	-0.2018791	180.4	-0.2307661
180.6	0.4895873	180.6	0.4455807	180.6	0.4955169	180.6	0.5351897	180.6	0.4879426	180.6	0.5219869	180.6	0.5300615	180.6	-0.241958	180.6	-0.2284935	180.6	-0.2990196	180.6	-0.2491028	180.6	-0.2296292	180.6	-0.2429042	180.6	-0.2361307	180.6	-0.198976	180.6	-0.2305077
180.8	0.4860035	180.8	0.4451019	180.8	0.493599	180.8	0.5350809	180.8	0.4926617	180.8	0.5239787	180.8	0.5348461	180.8	-0.2482101	180.8	-0.2284086	180.8	-0.2946798	180.8	-0.2508284	180.8	-0.2371248	180.8	-0.2449653	180.8	-0.2337624	180.8	-0.2017801	180.8	-0.2273312
181	0.4903762	181	0.4465078	181	0.5013463	181	0.5383104	181	0.4996879	181	0.5288097	181	0.5353347	181	-0.2486543	181	-0.2296932	181	-0.2939398	181	-0.2491164	181	-0.2337449	181	-0.2405218	181	-0.2363109	181	-0.2006141	181	-0.2294838
181.2	0.4922561	181.2	0.4571848	181.2	0.5015286	181.2	0.54303	181.2	0.4991416	181.2	0.5278839	181.2	0.5372062	181.2	-0.2455298	181.2	-0.2285013	181.2	-0.2924682	181.2	-0.2458773	181.2	-0.2292468	181.2	-0.2447621	181.2	-0.2327557	181.2	-0.2050597	181.2	-0.2266193
181.4	0.495272	181.4	0.459427	181.4	0.5025631	181.4	0.5449848	181.4	0.5007509	181.4	0.5317623	181.4	0.5419722	181.4	-0.2441625	181.4	-0.2304557	181.4	-0.2945347	181.4	-0.2472966	181.4	-0.232683	181.4	-0.2402059	181.4	-0.2341652	181.4	-0.1979441	181.4	-0.2289779
181.6	0.5021753	181.6	0.461302	181.6	0.5076538	181.6	0.5504259	181.6	0.5066081	181.6	0.5348327	181.6	0.5421118	181.6	-0.2431341	181.6	-0.2297837	181.6	-0.2908942	181.6	-0.247659	181.6	-0.2313533	181.6	-0.2435229	181.6	-0.2335031	181.6	-0.20234	181.6	-0.2305143
181.8	0.5003018	181.8	0.4651587	181.8	0.5086764	181.8	0.5465336	181.8	0.5076408	181.8	0.5371279	181.8	0.5439	181.8	-0.2448087	181.8	-0.2264702	181.8	-0.2903416	181.8	-0.2470035	181.8	-0.2304816	181.8	-0.2417793	181.8	-0.235413	181.8	-0.1957504	181.8	-0.22702
182	0.5082278	182	0.4642023	182	0.5144318	182	0.5545925	182	0.5117635	182	0.5428904	182	0.549107	182	-0.2470626	182	-0.2309915	182	-0.2932694	182	-0.2481369	182	-0.2318625	182	-0.2380501	182	-0.2345341	182	-0.2020489	182	-0.2257611
182.2	0.508094	182.2	0.4676238	182.2	0.5149096	182.2	0.5571392	182.2	0.5160618	182.2	0.5470924	182.2	0.552688	182.2	-0.2429767	182.2	-0.2323372	182.2	-0.2909792	182.2	-0.2449204	182.2	-0.2293923	182.2	-0.2448385	182.2	-0.2353732	182.2	-0.1979074	182.2	-0.2275932
182.4	0.5135083	182.4	0.4709911	182.4	0.5219843	182.4	0.5584254	182.4	0.5188893	182.4	0.5485387	182.4	0.5557148	182.4	-0.2462524	182.4	-0.229412	182.4	-0.2898198	182.4	-0.2475929	182.4	-0.2303424	182.4	-0.2393716	182.4	-0.2341056	182.4	-0.1972706	182.4	-0.2300864
182.6	0.5149539	182.6	0.4723627	182.6	0.5219527	182.6	0.5616405	182.6	0.5186951	182.6	0.5529621	182.6	0.5624851	182.6	-0.2458844	182.6	-0.2318925	182.6	-0.2897303	182.6	-0.2429767	182.6	-0.2319255	182.6	-0.2449246	182.6	-0.2337533	182.6	-0.1939162	182.6	-0.2325412
182.8	0.5218464	182.8	0.4763923	182.8	0.526987	182.8	0.5602447	182.8	0.5242656	182.8	0.5493929	182.8	0.5620323	182.8	-0.2469806	182.8	-0.2326656	182.8	-0.2932656	182.8	-0.2464053	182.8	-0.2303649	182.8	-0.2410161	182.8	-0.2372836	182.8	-0.1970363	182.8	-0.2268048
183	0.5211501	183	0.4768673	183	0.5287584	183	0.5654283	183	0.5267444	183	0.5569896	183	0.5630955	183	-0.243812	183	-0.2257769	183	-0.2898046	183	-0.2459817	183	-0.2265396	183	-0.241238	183	-0.2342497	183	-0.1985269	183	-0.2245868
183.2	0.5220401	183.2	0.4768883	183.2	0.5321541	183.2	0.5712165	183.2	0.5240381	183.2	0.5590989	183.2	0.5655275	183.2	-0.2442927	183.2	-0.2290146	183.2	-0.287585	183.2	-0.2469105	183.2	-0.2313175	183.2	-0.2378917	183.2	-0.2328711	183.2	-0.1941357	183.2	-0.228888
183.4	0.5248592	183.4	0.484411	183.4	0.5344959	183.4	0.5742059	183.4	0.5323538	183.4	0.558479	183.4	0.5698544	183.4	-0.2445029	183.4	-0.2263384	183.4	-0.2874256	183.4	-0.2454508	183.4	-0.2275145	183.4	-0.2400735	183.4	-0.2301719	183.4	-0.1975103	183.4	-0.2303514
183.6	0.5342586	183.6	0.4868016	183.6	0.5420724	183.6	0.5751256	183.6	0.5332431	183.6	0.5631396	183.6	0.5697439	183.6	-0.242827	183.6	-0.2291018	183.6	-0.2956234	183.6	-0.2458675	183.6	-0.2274416	183.6	-0.2428781	183.6	-0.2332069	183.6	-0.1943433	183.6	-0.2271055
183.8	0.5295753	183.8	0.491207	183.8	0.5398684	183.8	0.5789041	183.8	0.5371016	183.8	0.5680189	183.8	0.5723615	183.8	-0.2430344	183.8	-0.2289441	183.8	-0.2860404	183.8	-0.2481487	183.8	-0.2306597	183.8	-0.2426638	183.8	-0.2349914	183.8	-0.1944183	183.8	-0.2265108
184	0.5314927	184	0.4997103	184	0.5413571	184	0.582243	184	0.531396	184	0.5690548	184	0.5783707	184	-0.2461584	184	-0.2274986	184	-0.2906023	184	-0.2475794	184	-0.2320456	184	-0.2438746	184	-0.2297926	184	-0.196291	184	-0.2270247
184.2	0.5326837	184.2	0.49922	184.2	0.5450001	184.2	0.5842691	184.2	0.5413086	184.2	0.5708081	184.2	0.5876055	184.2	-0.2446185	184.2	-0.2275893	184.2	-0.2913447	184.2	-0.2472104	184.2	-0.2245765	184.2	-0.2396797	184.2	-0.2323454	184.2	-0.1920876	184.2	-0.2288685
184.4	0.5360992	184.4	0.4976777	184.4	0.5482988	184.4	0.5858953	184.4	0.5465623	184.4	0.5742373	184.4	0.5810496	184.4	-0.2440806	184.4	-0.2259716	184.4	-0.2906653	184.4	-0.2437861	184.4	-0.2295692	184.4	-0.236923	184.4	-0.2312837	184.4	-0.2013724	184.4	-0.2293094
184.6	0.5380511	184.6	0.5051781	184.6	0.5494864	184.6	0.5867665	184.6	0.5469419	184.6	0.575515	184.6	0.5902427	184.6	-0.2436846	184.6	-0.2257662	184.6	-0.2899609	184.6	-0.2414312	184.6	-0.2303127	184.6	-0.2393124	184.6	-0.233012	184.6	-0.1919103	184.6	-0.226449
184.8	0.5423945	184.8	0.4996378	184.8	0.5531708	184.8	0.5928095	184.8	0.5483155	184.8	0.5766047	184.8	0.5861251	184.8	-0.2426412	184.8	-0.2250439	184.8	-0.2888564	184.8	-0.2441635	184.8	-0.2241969	184.8	-0.239301	184.8	-0.2289995	184.8	-0.1966692	184.8	-0.227916
185	0.5468822	185	0.5042381	185	0.5546363	185	0.5908585	185	0.550907	185	0.5859949	185	0.5884932	185	-0.243782	185	-0.2288199	185	-0.2922004	185	-0.2450259	185	-0.2252372	185	-0.241522	185	-0.2318714	185	-0.1965832	185	-0.223941
185.2	0.5439746	185.2	0.5104669	185.2	0.5585988	185.2	0.5971489	185.2	0.5548729	185.2	0.5849371	185.2	0.5949567	185.2	-0.2391168	185.2	-0.2273384	185.2	-0.2874443	185.2	-0.2441109	185.2	-0.227757	185.2	-0.2381867	185.2	-0.2327539	185.2	-0.194617	185.2	-0.2250271
185.4	0.5509753	185.4	0.5115117	185.4	0.5588077	185.4	0.5959759	185.4	0.5556906	185.4	0.5883597	185.4	0.5973777	185.4	-0.2422004	185.4	-0.2226565	185.4	-0.2877416	185.4	-0.2399369	185.4	-0.2283196	185.4	-0.2422195	185.4	-0.2319506	185.4	-0.194007	185.4	-0.2253075
185.6	0.5491939	185.6	0.5166376	185.6	0.5642198	185.6	0.6007462	185.6	0.5623147	185.6	0.5863166	185.6	0.5953892	185.6	-0.2414297	185.62	-0.2257564	185.62	-0.2925108	185.62	-0.2404668	185.62	-0.2291286	185.62	-0.2349077	185.62	-0.2321426	185.62	-0.1984285	185.62	-0.2295594
185.8	0.5566549	185.8	0.5229798	185.8	0.568591	185.8	0.6068402	185.8	0.5636654	185.8	0.5925969	185.8	0.6014788	185.8	-0.244031	185.8	-0.2233468	185.8	-0.2892848	185.8	-0.2427463	185.8	-0.2304262	185.8	-0.2379548	185.8	-0.2271776	185.8	-0.1915183	185.8	-0.2233363
186	0.5583062	186	0.5173991	186	0.5667115	186	0.6089697	186	0.5643082	186	0.5949494	186	0.6035682	186	-0.239288	186	-0.2271417	186	-0.2886542	186	-0.2428375	186	-0.23141	186	-0.2328441	186	-0.2286635	186	-0.192822	186	-0.227314
186.2	0.559112	186.2	0.5240074	186.2	0.5705162	186.2	0.6055429	186.2	0.570381	186.2	0.5918684	186.2	0.6026674	186.2	-0.2402941	186.2	-0.2236272	186.2	-0.2895549	186.2	-0.2409851	186.2	-0.2264573	186.2	-0.2341301	186.2	-0.2294068	186.2	-0.1953578	186.2	-0.2241338
186.4	0.5653459	186.4	0.5265791	186.4	0.5721377	186.4	0.6121312	186.4	0.5683005	186.4	0.5956225	186.4	0.6076609	186.4	-0.2371976	186.4	-0.2255802	186.4	-0.2825113	186.4	-0.241997	186.4	-0.2230623	186.4	-0.2372685	186.4	-0.2285204	186.4	-0.1947135	186.4	-0.2273438
186.6	0.5682095	186.6	0.5224155	186.6	0.5799142	186.6	0.6079786	186.6	0.5683548	186.6	0.6016752	186.6	0.6148888	186.6	-0.2425431	186.6	-0.2251943	186.6	-0.2858697	186.6	-0.2402273	186.6	-0.229841	186.6	-0.2357541	186.6	-0.2297243	186.6	-0.1917746	186.6	-0.2251221
186.8	0.5668035	186.8	0.5286611	186.8	0.5798922	186.8	0.617103	186.8	0.5727938	186.8	0.6045046	186.8	0.6126813	186.8	-0.242648	186.8	-0.2235841	186.8	-0.2876367	186.8	-0.2414652	186.8	-0.2260653	186.8	-0.2379603	186.8	-0.2250156	186.8	-0.1936572	186.8	-0.2225872
187	0.5692851	187	0.531324	187	0.5788871	187	0.6229224	187	0.5737079	187	0.6043691	187	0.6146622	187	-0.2418509	187	-0.2241489	187	-0.2836202	187	-0.2386995	187	-0.2309265	187	-0.2383876	187	-0.229091	187	-0.1943396	187	-0.2247381
187.2	0.5721546	187.2	0.5311375	187.2	0.579838	187.2	0.6234277	187.2	0.5833241	187.2	0.6122565	187.2	0.6165065	187.2	-0.2408061	187.2	-0.2251665	187.2	-0.2870665	187.2	-0.2411056	187.2	-0.2306124	187.2	-0.2354388	187.2	-0.2265304	187.2	-0.1932703	187.2	-0.2230552
187.4	0.5718045	187.4	0.5359293	187.4	0.5872636	187.4	0.6248136	187.4	0.5810854	187.4	0.6101689	187.4	0.6190377	187.4	-0.2388264	187.4	-0.2224763	187.4	-0.2852358	187.4	-0.2407393	187.4	-0.2312065	187.4	-0.2397629	187.4	-0.2315731	187.4	-0.1952776	187.4	-0.2279588
187.6	0.5784474	187.6	0.5375768	187.6	0.5851097	187.6	0.6273468	187.6	0.5797202	187.6	0.612499	187.6	0.6268497	187.6	-0.2418168	187.6	-0.2233663	187.6	-0.2852852	187.6	-0.2456398	187.6	-0.2273212	187.6	-0.2378474	187.6	-0.2257086	187.6	-0.1922914	187.6	-0.2261868
187.8	0.5857544	187.8	0.5400131	187.8	0.5903272	187.8	0.6257976	187.8	0.5853159	187.8	0.6158282	187.8	0.6267285	187.8	-0.2392106	187.8	-0.2229809	187.8	-0.2845235	187.8	-0.2441489	187.8	-0.2236116	187.8	-0.23667	187.8	-0.2270394	187.8	-0.1884798	187.8	-0.22567
188	0.5763229	188	0.539214	188	0.5944263	188	0.6283103	188	0.5901083	188	0.6178737	188	0.6304043	188	-0.2398395	188	-0.2268516	188	-0.2845088	188	-0.2382828	188	-0.2259379	188	-0.2365254	188	-0.2288614	188	-0.1898039	188	-0.2266286
188.2	0.5835245	188.2	0.5470403	188.2	0.597325	188.2	0.6340114	188.2	0.5900007	188.2	0.6197771	188.2	0.6292736	188.2	-0.2420046	188.2	-0.2227197	188.2	-0.2812789	188.2	-0.2448025	188.2	-0.2255053	188.2	-0.2394335	188.2	-0.2232413	188.2	-0.1901793	188.2	-0.2211496
188.4	0.5881712	188.4	0.5501749	188.4	0.5954248	188.4	0.6344171	188.4	0.5912338	188.4	0.617777	188.4	0.6326267	188.4	-0.2409679	188.4	-0.2224726	188.4	-0.284716	188.4	-0.2377016	188.4	-0.2220302	188.4	-0.2320406	188.4	-0.2253708	188.4	-0.1912346	188.4	-0.2217502
188.6	0.588801	188.6	0.5524939	188.6	0.60038	188.6	0.6328728	188.6	0.5975317	188.6	0.6231291	188.6	0.6365756	188.6	-0.2374468	188.6	-0.2179189	188.6	-0.2826898	188.6	-0.2383486	188.6	-0.2226557	188.6	-0.2316155	188.6	-0.2246023	188.6	-0.1923777	188.6	-0.2235295
188.8	0.592133	188.8	0.5512397	188.8	0.601143	188.8	0.6402113	188.8	0.595323	188.8	0.6237914	188.8	0.63878	188.8	-0.2364753	188.8	-0.2247535	188.8	-0.2888608	188.8	-0.2391386	188.8	-0.2272574	188.8	-0.2332421	188.8	-0.2272845	188.8	-0.1917252	188.8	-0.2216703
189	0.5962853	189	0.5594656	189	0.6060245	189	0.6454913	189	0.6015997	189	0.6289948	189	0.6422901	189	-0.2397158	189	-0.2213938	189	-0.286172	189	-0.2381551	189	-0.2257111	189	-0.2326794	189	-0.2231393	189	-0.1963118	189	-0.2216212
189.2	0.5951967	189.2	0.5538406	189.2	0.6046662	189.2	0.6453274	189.2	0.5994954	189.2	0.6307057	189.2	0.6414248	189.2	-0.2405978	189.2	-0.2221564	189.2	-0.282254	189.2	-0.2369629	189.2	-0.2301997	189.2	-0.2382901	189.2	-0.2265218	189.2	-0.1873709	189.2	-0.2223784
189.4	0.5999582	189.4	0.5588309	189.4	0.6045007	189.4	0.6491076	189.4	0.6030643	189.4	0.6314932	189.4	0.6440911	189.4	-0.2419554	189.4	-0.2208708	189.4	-0.2869557	189.4	-0.2383049	189.4	-0.2206849	189.4	-0.2360261	189.4	-0.2231765	189.4	-0.1888419	189.4	-0.2212581
189.6	0.5977303	189.6	0.5601354	189.6	0.6106828	189.6	0.6496024	189.6	0.6069943	189.6	0.6373191	189.6	0.6448861	189.6	-0.2388203	189.6	-0.2230627	189.6	-0.2839347	189.6	-0.2423752	189.6	-0.2259459	189.6	-0.2368974	189.6	-0.225223	189.6	-0.1904991	189.6	-0.220124
189.8	0.6022391	189.8	0.5615143	189.8	0.6094364	189.8	0.6480247	189.8	0.6061679	189.8	0.6365595	189.8	0.6450126	189.8	-0.2363351	189.8	-0.2202561	189.8	-0.2858307	189.8	-0.2349976	189.8	-0.2181288	189.8	-0.2325659	189.8	-0.2273645	189.8	-0.190921	189.8	-0.2234216
190	0.6079707	190	0.5666342	190	0.610904	190	0.6488381	190	0.6092557	190	0.6327567	190	0.6481754	190	-0.2369337	190	-0.2241005	190	-0.281022	190	-0.2404815	190	-0.2287902	190	-0.2325564	190	-0.2274935	190	-0.1934979	190	-0.2201665
190.2	0.6048616	190.2	0.5658073	190.2	0.6138172	190.2	0.6539968	190.2	0.6114389	190.2	0.6418481	190.2	0.6563202	190.2	-0.2388262	190.2	-0.2221356	190.2	-0.2848562	190.2	-0.2413043	190.2	-0.2266209	190.2	-0.2313005	190.2	-0.2290096	190.2	-0.1901705	190.2	-0.2202501
190.4	0.6086566	190.4	0.5683232	190.4	0.6178287	190.4	0.6576378	190.4	0.6155275	190.4	0.6392364	190.4	0.6555076	190.4	-0.237366	190.4	-0.2215252	190.4	-0.2782286	190.4	-0.2390874	190.4	-0.2250926	190.4	-0.2325657	190.4	-0.2230311	190.4	-0.1928349	190.4	-0.2219924
190.6	0.6107456	190.6	0.5701314	190.6	0.6231222	190.6	0.6573631	190.6	0.6138373	190.6	0.6405461	190.6	0.6528697	190.6	-0.2375095	190.6	-0.2224346	190.6	-0.2811266	190.6	-0.2367757	190.6	-0.2226983	190.6	-0.2305667	190.6	-0.2183926	190.6	-0.1913526	190.6	-0.2249374
190.8	0.61045	190.8	0.5766943	190.8	0.6212473	190.8	0.660174	190.8	0.6182277	190.8	0.6508271	190.8	0.6620244	190.8	-0.2374836	190.8	-0.2238235	190.8	-0.27964	190.8	-0.2363513	190.8	-0.2214745	190.8	-0.2326776	190.8	-0.2277036	190.8	-0.1884894	190.8	-0.2243465
191	0.618103	191	0.5792699	191	0.6251807	191	0.6640935	191	0.6159201	191	0.6477881	191	0.660289	191	-0.2368614	191	-0.220702	191	-0.2832535	191	-0.2393972	191	-0.2245667	191	-0.2289544	191	-0.2257825	191	-0.186579	191	-0.2233537
191.2	0.6178085	191.2	0.5751385	191.2	0.6247618	191.2	0.6642613	191.2	0.6225225	191.2	0.6512657	191.2	0.662304	191.2	-0.2385518	191.2	-0.2168256	191.2	-0.2853688	191.2	-0.2354488	191.2	-0.21902	191.2	-0.2314214	191.2	-0.2237161	191.2	-0.1895471	191.2	-0.2154881
191.4	0.6207303	191.4	0.5818383	191.4	0.6272435	191.4	0.6657662	191.4	0.6275765	191.4	0.6501494	191.4	0.6680467	191.4	-0.2369321	191.4	-0.218465	191.4	-0.286797	191.4	-0.2399213	191.4	-0.2237698	191.4	-0.2316096	191.4	-0.2228637	191.4	-0.1940142	191.4	-0.2241392
191.6	0.6179031	191.6	0.5750275	191.6	0.6345217	191.6	0.6713668	191.6	0.6238773	191.6	0.6577901	191.6	0.6727876	191.6	-0.2372351	191.6	-0.2206007	191.6	-0.283417	191.6	-0.2370861	191.6	-0.2248186	191.6	-0.2324211	191.6	-0.2238695	191.6	-0.1876498	191.6	-0.2212878
191.8	0.619076	191.8	0.5845661	191.8	0.6309569	191.8	0.6731392	191.8	0.6263196	191.8	0.6573422	191.8	0.6719673	191.8	-0.2382482	191.8	-0.2173178	191.8	-0.2779382	191.8	-0.2354158	191.8	-0.2182418	191.8	-0.2265074	191.8	-0.22388	191.8	-0.1895632	191.8	-0.2230141
192	0.6248685	192	0.5869359	192	0.6356419	192	0.669609	192	0.6302993	192	0.6616334	192	0.6754386	192	-0.2372118	192	-0.218601	192	-0.2772036	192	-0.2378776	192	-0.2196016	192	-0.2324511	192	-0.2245369	192	-0.1853154	192	-0.219542
192.2	0.6298441	192.2	0.5920504	192.2	0.633811	192.2	0.6752627	192.2	0.6323184	192.2	0.6615381	192.2	0.6770839	192.2	-0.238141	192.2	-0.2228566	192.2	-0.2752012	192.2	-0.23721	192.2	-0.2233089	192.2	-0.2271075	192.2	-0.2206371	192.2	-0.1894544	192.2	-0.2232525
192.4	0.6258118	192.4	0.5928054	192.4	0.6347846	192.4	0.6797878	192.4	0.6354468	192.4	0.6632968	192.4	0.6760087	192.4	-0.2345364	192.4	-0.2208577	192.4	-0.2841546	192.4	-0.2339512	192.4	-0.2244822	192.4	-0.2335435	192.4	-0.2239868	192.4	-0.1953612	192.4	-0.2193627
192.6	0.631122	192.6	0.5936317	192.6	0.6407897	192.6	0.6763415	192.6	0.6378316	192.6	0.6672931	192.6	0.6814867	192.6	-0.2358436	192.6	-0.2214166	192.6	-0.2822815	192.6	-0.2322751	192.6	-0.2181494	192.6	-0.2337411	192.6	-0.2229035	192.6	-0.1869384	192.6	-0.220644
192.8	0.6366462	192.8	0.5931161	192.8	0.6467427	192.8	0.6850943	192.8	0.6402188	192.8	0.6683013	192.8	0.6839157	192.8	-0.234862	192.8	-0.2200625	192.8	-0.2826983	192.8	-0.238448	192.8	-0.2214131	192.8	-0.2311521	192.8	-0.2231791	192.8	-0.190046	192.8	-0.2160532
193	0.6394712	193	0.5979525	193	0.6428578	193	0.6844118	193	0.6386033	193	0.6659706	193	0.680796	193	-0.2351135	193	-0.2164512	193	-0.2817582	193	-0.2371686	193	-0.2174398	193	-0.2277979	193	-0.223858	193	-0.1858515	193	-0.2178337
193.2	0.6396253	193.2	0.601398	193.2	0.6482489	193.2	0.6855596	193.2	0.6421554	193.2	0.671779	193.2	0.6862002	193.2	-0.2381822	193.2	-0.21874	193.2	-0.2802863	193.2	-0.2332068	193.2	-0.2232545	193.2	-0.2316725	193.2	-0.2242123	193.2	-0.1848505	193.2	-0.2196986
193.4	0.6387381	193.4	0.6000426	193.4	0.6478891	193.4	0.6877415	193.4	0.6439821	193.4	0.6669742	193.4	0.685024	193.4	-0.2337303	193.4	-0.2160667	193.4	-0.282027	193.4	-0.2319677	193.4	-0.2180706	193.4	-0.2301044	193.4	-0.2191614	193.4	-0.1886229	193.4	-0.2210221
193.6	0.6405325	193.6	0.607253	193.6	0.6542274	193.6	0.691443	193.6	0.6511726	193.6	0.6763566	193.6	0.6951349	193.6	-0.2341965	193.6	-0.2163596	193.6	-0.2766067	193.6	-0.2361421	193.6	-0.2184825	193.6	-0.2314017	193.6	-0.2207734	193.6	-0.185767	193.6	-0.2170956
193.8	0.6475117	193.8	0.5993045	193.8	0.6545181	193.8	0.6900629	193.8	0.6470265	193.8	0.6802615	193.8	0.688685	193.8	-0.2346241	193.8	-0.2129288	193.8	-0.2795368	193.8	-0.2313657	193.8	-0.2171258	193.8	-0.2246753	193.8	-0.2214464	193.8	-0.18723	193.8	-0.2207326
194	0.6408801	194	0.6086079	194	0.6523246	194	0.6951434	194	0.6476371	194	0.6796017	194	0.691712	194	-0.2367899	194	-0.215673	194	-0.2810957	194	-0.2363674	194	-0.2211678	194	-0.2293719	194	-0.2237198	194	-0.1866975	194	-0.2176283
194.2	0.6460251	194.2	0.6126608	194.2	0.6578099	194.2	0.6956158	194.2	0.6530496	194.2	0.6806898	194.2	0.6949823	194.2	-0.2417778	194.2	-0.2150144	194.2	-0.2806869	194.2	-0.2336368	194.2	-0.2194944	194.2	-0.2270707	194.2	-0.2227456	194.2	-0.1821002	194.2	-0.2169874
194.4	0.6497793	194.4	0.6107107	194.4	0.6639546	194.4	0.6968232	194.4	0.6519497	194.4	0.6806226	194.4	0.6985673	194.4	-0.2360791	194.4	-0.2171264	194.4	-0.276633	194.4	-0.232018	194.4	-0.2201682	194.4	-0.2293116	194.4	-0.2167594	194.4	-0.1833277	194.4	-0.2155292
194.6	0.6492857	194.6	0.6113738	194.6	0.6599824	194.6	0.6996465	194.6	0.6535735	194.6	0.6865169	194.6	0.6996997	194.6	-0.2340234	194.6	-0.2185915	194.6	-0.275515	194.6	-0.2361345	194.6	-0.2220953	194.6	-0.2289474	194.6	-0.2203098	194.6	-0.1834491	194.6	-0.2150972
194.8	0.6533976	194.8	0.616385	194.8	0.662879	194.8	0.7024257	194.8	0.6590737	194.8	0.6842628	194.8	0.704389	194.8	-0.2346518	194.8	-0.2130517	194.8	-0.2776095	194.8	-0.2291746	194.8	-0.2192804	194.8	-0.2285863	194.8	-0.2229208	194.8	-0.1876629	194.8	-0.2156312
195	0.6532013	195	0.6144578	195	0.6656251	195	0.7069926	195	0.6589922	195	0.686819	195	0.7044682	195	-0.2280315	195	-0.2167728	195	-0.2725014	195	-0.2296093	195	-0.218113	195	-0.2307262	195	-0.2178714	195	-0.1839322	195	-0.2160527
195.2	0.6560901	195.2	0.6189666	195.2	0.6634704	195.2	0.7033725	195.2	0.6629544	195.2	0.6914058	195.2	0.7053608	195.2	-0.2302606	195.2	-0.2111428	195.2	-0.2779897	195.2	-0.2324724	195.2	-0.219399	195.2	-0.2295004	195.2	-0.21738	195.2	-0.1844042	195.2	-0.2186172
195.4	0.655353	195.4	0.6225439	195.4	0.6723462	195.4	0.7091216	195.4	0.6631039	195.4	0.6939054	195.4	0.7044193	195.4	-0.2341905	195.4	-0.2162372	195.4	-0.2798054	195.4	-0.2301418	195.4	-0.2221413	195.4	-0.2345693	195.4	-0.2220242	195.4	-0.1817168	195.4	-0.2149643
195.6	0.6608875	195.6	0.6213207	195.6	0.6684068	195.6	0.7067794	195.6	0.6693122	195.6	0.6968809	195.6	0.709846	195.6	-0.2335003	195.6	-0.218531	195.6	-0.2830344	195.6	-0.2356375	195.6	-0.218394	195.6	-0.2280561	195.6	-0.2260227	195.6	-0.1837905	195.6	-0.2171116
195.8	0.6569135	195.8	0.6245217	195.8	0.6700937	195.8	0.7167937	195.8	0.6680474	195.8	0.6933148	195.8	0.7129812	195.8	-0.2376204	195.8	-0.2209165	195.8	-0.2776669	195.8	-0.23478	195.8	-0.2167803	195.8	-0.2315319	195.8	-0.2202253	195.8	-0.1851857	195.8	-0.2123215
196	0.6639953	196	0.6323583	196	0.6723386	196	0.7133781	196	0.6630604	196	0.6995941	196	0.7156786	196	-0.2359019	196	-0.2158341	196	-0.2796032	196	-0.2307541	196	-0.2195323	196	-0.2253979	196	-0.2211661	196	-0.1781936	196	-0.216664
196.2	0.6690606	196.2	0.6281093	196.2	0.6763681	196.2	0.714395	196.2	0.6727171	196.2	0.7007954	196.2	0.7169129	196.2	-0.2320905	196.2	-0.2151766	196.2	-0.2766169	196.2	-0.2313231	196.2	-0.2187057	196.2	-0.2242077	196.2	-0.2181961	196.2	-0.1823707	196.2	-0.2140399
196.4	0.6689829	196.4	0.6345623	196.4	0.6760163	196.4	0.7190527	196.4	0.6748534	196.4	0.6994601	196.4	0.7217869	196.4	-0.2284405	196.4	-0.2102205	196.4	-0.2772279	196.4	-0.2324472	196.4	-0.2217743	196.4	-0.2315323	196.4	-0.2163047	196.4	-0.1834991	196.4	-0.2146684
196.6	0.6692232	196.6	0.6309114	196.6	0.6847142	196.6	0.7183377	196.6	0.6750758	196.6	0.7016007	196.6	0.7225136	196.6	-0.2316402	196.6	-0.2136554	196.6	-0.2757864	196.6	-0.2298802	196.6	-0.2191614	196.6	-0.2244653	196.6	-0.2179933	196.6	-0.1790115	196.6	-0.2213879
196.8	0.6720168	196.8	0.6335406	196.8	0.6821046	196.8	0.7197595	196.8	0.6753367	196.8	0.7062099	196.8	0.7201506	196.8	-0.2327282	196.8	-0.2107708	196.8	-0.2747312	196.8	-0.2342912	196.8	-0.2152231	196.8	-0.2304028	196.8	-0.2215735	196.8	-0.1827376	196.8	-0.2156684
197	0.6747853	197	0.6400142	197	0.6793559	197	0.7216862	197	0.6799503	197	0.7081687	197	0.7214944	197	-0.2330797	197	-0.2168903	197	-0.2771003	197	-0.2289114	197	-0.214655	197	-0.2235567	197	-0.2198715	197	-0.1796871	197	-0.2152185
197.2	0.6756654	197.2	0.6370602	197.2	0.6872936	197.2	0.7266408	197.2	0.6857988	197.2	0.7088404	197.2	0.7231479	197.2	-0.2288097	197.2	-0.2112921	197.2	-0.2743276	197.2	-0.233094	197.2	-0.2119771	197.2	-0.2286382	197.2	-0.2174296	197.2	-0.1760008	197.2	-0.2195133
197.4	0.6770788	197.4	0.6367278	197.4	0.6836533	197.4	0.7275103	197.4	0.6812358	197.4	0.7164978	197.4	0.7247882	197.4	-0.2295812	197.4	-0.2131875	197.4	-0.2742407	197.4	-0.2300761	197.4	-0.2149279	197.4	-0.2276361	197.4	-0.2182762	197.4	-0.1821036	197.4	-0.2149926
197.6	0.6823735	197.6	0.6397437	197.6	0.6906289	197.6	0.7226591	197.6	0.6853659	197.6	0.7126027	197.6	0.7296853	197.6	-0.2294768	197.6	-0.215521	197.6	-0.2759458	197.6	-0.2282813	197.6	-0.2184208	197.6	-0.2262753	197.6	-0.2187453	197.6	-0.182395	197.6	-0.2123941
197.8	0.6775721	197.8	0.6437776	197.8	0.6898619	197.8	0.7320489	197.8	0.6859206	197.8	0.7159401	197.8	0.7305014	197.8	-0.2301954	197.8	-0.2175974	197.8	-0.277381	197.8	-0.232818	197.8	-0.2176415	197.8	-0.2264992	197.8	-0.2200768	197.8	-0.1777701	197.8	-0.2174207
198	0.6850803	198	0.6451938	198	0.6926624	198	0.7325699	198	0.6865391	198	0.7154832	198	0.7286118	198	-0.2283774	198	-0.2183218	198	-0.2771817	198	-0.2339043	198	-0.2167255	198	-0.2245493	198	-0.2128417	198	-0.1825648	198	-0.2132857
198.21	0.6782544	198.21	0.643088	198.21	0.6960505	198.21	0.7301984	198.21	0.6921542	198.21	0.7210281	198.21	0.7339858	198.21	-0.2359582	198.2	-0.2077045	198.2	-0.2768513	198.2	-0.2290381	198.2	-0.2131373	198.2	-0.2317701	198.2	-0.2111862	198.2	-0.1792268	198.2	-0.2195751
198.4	0.6839002	198.4	0.6484381	198.4	0.6981992	198.4	0.733454	198.4	0.6878909	198.4	0.7222562	198.4	0.7344354	198.4	-0.2295419	198.4	-0.2130724	198.4	-0.2724308	198.4	-0.2277438	198.4	-0.2167415	198.4	-0.2260015	198.4	-0.2129345	198.4	-0.1812939	198.4	-0.2119295
198.6	0.6870974	198.6	0.6482065	198.6	0.6964089	198.6	0.7354181	198.6	0.6866046	198.6	0.7222406	198.6	0.7388009	198.6	-0.2286728	198.6	-0.2101076	198.6	-0.274873	198.6	-0.2290308	198.6	-0.2147453	198.6	-0.2234366	198.6	-0.2143807	198.6	-0.1819064	198.6	-0.2127356
198.8	0.6896638	198.8	0.6499644	198.8	0.7001808	198.8	0.7367392	198.8	0.6923883	198.8	0.7205416	198.8	0.7385853	198.8	-0.2317477	198.8	-0.2123922	198.8	-0.2768249	198.8	-0.2287027	198.8	-0.2156152	198.8	-0.2269602	198.8	-0.2145986	198.8	-0.1796869	198.8	-0.2131113
199	0.687736	199	0.653605	199	0.7037465	199	0.7397026	199	0.6963753	199	0.7259169	199	0.742036	199	-0.2324803	199	-0.2145784	199	-0.2740088	199	-0.2292274	199	-0.2106824	199	-0.2254117	199	-0.2146473	199	-0.1826746	199	-0.2126687
199.2	0.6905207	199.2	0.6571176	199.2	0.7011144	199.2	0.7420201	199.2	0.6986622	199.2	0.7264209	199.2	0.7438275	199.2	-0.2312601	199.2	-0.2147594	199.2	-0.2746562	199.2	-0.2293016	199.2	-0.211811	199.2	-0.2263237	199.2	-0.2175638	199.2	-0.1813147	199.2	-0.2124358
199.4	0.6922828	199.4	0.6569386	199.4	0.7051463	199.4	0.7468908	199.4	0.6973429	199.4	0.7295631	199.4	0.7478238	199.4	-0.2303154	199.4	-0.2088311	199.4	-0.2764406	199.4	-0.2284248	199.4	-0.2127338	199.4	-0.2253675	199.4	-0.2141039	199.4	-0.1799297	199.4	-0.2148866
199.6	0.688732	199.6	0.6603047	199.6	0.7057598	199.6	0.7441242	199.6	0.7050035	199.6	0.7334675	199.6	0.7476315	199.6	-0.2317069	199.6	-0.2132817	199.6	-0.2781532	199.6	-0.228528	199.6	-0.2159331	199.6	-0.22337	199.6	-0.2119028	199.6	-0.1838866	199.6	-0.2162373
199.8	0.6945499	199.8	0.6584342	199.8	0.7084133	199.8	0.7461098	199.8	0.7022519	199.8	0.7339697	199.8	0.7512899	199.8	-0.2311133	199.8	-0.2109797	199.8	-0.2720728	199.8	-0.2277199	199.8	-0.2188614	199.8	-0.2197905	199.8	-0.2156133	199.8	-0.1814279	199.8	-0.2147464
200	0.6935944	200	0.6631482	200	0.7098761	200	0.7475045	200	0.7039397	200	0.731355	200	0.7460989	200	-0.2322895	200	-0.2115094	200	-0.273341	200	-0.2257516	200	-0.21761	200	-0.224866	200	-0.218514	200	-0.1857195	200	-0.2191588
200.2	0.6964951	200.2	0.6606498	200.2	0.7110954	200.2	0.7490261	200.2	0.7035742	200.2	0.7336195	200.2	0.7537956	200.2	-0.2309547	200.2	-0.2069451	200.2	-0.2763944	200.2	-0.2260908	200.2	-0.2154165	200.2	-0.221286	200.2	-0.2141222	200.2	-0.1792037	200.2	-0.2095379
200.4	0.7048516	200.4	0.6661357	200.4	0.7122468	200.4	0.750867	200.4	0.706678	200.4	0.7365124	200.4	0.7493562	200.4	-0.2288584	200.4	-0.2095011	200.4	-0.2766982	200.4	-0.2266428	200.4	-0.2147394	200.4	-0.2232867	200.4	-0.2113621	200.4	-0.1799865	200.4	-0.2141409
200.6	0.7034346	200.6	0.6681977	200.6	0.7171353	200.6	0.7519253	200.6	0.7053344	200.6	0.745043	200.6	0.7548414	200.6	-0.2341077	200.6	-0.2130411	200.6	-0.2744552	200.6	-0.2259749	200.6	-0.2128799	200.6	-0.2253537	200.6	-0.2178642	200.6	-0.1782247	200.6	-0.2152334
200.8	0.7047943	200.8	0.6664734	200.8	0.7153398	200.8	0.7573755	200.8	0.715291	200.8	0.7361947	200.8	0.7563015	200.8	-0.2298035	200.8	-0.2110364	200.8	-0.2726554	200.8	-0.2291359	200.8	-0.2107716	200.8	-0.2194692	200.8	-0.213587	200.8	-0.178608	200.8	-0.2149995
201	0.7089717	201	0.6723715	201	0.7196495	201	0.7566186	201	0.7151439	201	0.7418796	201	0.7580299	201	-0.2281474	201	-0.2073316	201	-0.2744126	201	-0.2322889	201	-0.2124543	201	-0.2209652	201	-0.2152139	201	-0.182257	201	-0.2076118
201.2	0.7073014	201.2	0.6750175	201.2	0.7204711	201.2	0.756223	201.2	0.7141318	201.2	0.7443089	201.2	0.7612554	201.2	-0.2278434	201.2	-0.2063771	201.2	-0.2754554	201.2	-0.2279373	201.2	-0.2100289	201.2	-0.2219942	201.2	-0.2179018	201.2	-0.1808211	201.2	-0.2100501
201.4	0.7104262	201.4	0.6800243	201.4	0.7213335	201.4	0.7615471	201.4	0.7151921	201.4	0.7457829	201.4	0.7605124	201.4	-0.2285276	201.41	-0.2095329	201.41	-0.2742265	201.41	-0.2267984	201.41	-0.2150443	201.41	-0.2205724	201.41	-0.2180706	201.41	-0.1766697	201.41	-0.2102371
201.6	0.7146968	201.6	0.674789	201.6	0.7244549	201.6	0.7614885	201.6	0.7144663	201.6	0.7464916	201.6	0.7643383	201.6	-0.2285069	201.6	-0.207702	201.6	-0.26783	201.6	-0.2244806	201.6	-0.2120132	201.6	-0.2265137	201.6	-0.2118941	201.6	-0.1803683	201.6	-0.209635
201.8	0.7120458	201.8	0.6779832	201.8	0.7228935	201.8	0.7657199	201.8	0.7130709	201.8	0.7478194	201.8	0.7644269	201.8	-0.2284508	201.8	-0.2096137	201.8	-0.2685804	201.8	-0.2204508	201.8	-0.2102409	201.8	-0.2197315	201.8	-0.2133223	201.8	-0.1749002	201.8	-0.214093
202	0.7137471	202	0.6808344	202	0.725005	202	0.7650852	202	0.7242399	202	0.7513874	202	0.7646306	202	-0.2306891	202	-0.2121518	202	-0.2681922	202	-0.2295761	202	-0.2110445	202	-0.2258255	202	-0.210848	202	-0.177543	202	-0.2156233
202.2	0.7136245	202.2	0.6762214	202.2	0.7257341	202.2	0.7680507	202.2	0.7204928	202.2	0.7502077	202.2	0.7668142	202.2	-0.2260737	202.2	-0.2098677	202.2	-0.2708036	202.2	-0.2269035	202.2	-0.210612	202.2	-0.2211825	202.2	-0.211252	202.2	-0.1767645	202.2	-0.2119979
202.4	0.7173499	202.4	0.6813436	202.4	0.7300857	202.4	0.7651526	202.4	0.7261341	202.4	0.7532685	202.4	0.7684495	202.4	-0.2262633	202.4	-0.2064803	202.4	-0.2694764	202.4	-0.2255169	202.4	-0.2144862	202.4	-0.2208252	202.4	-0.2115428	202.4	-0.1768826	202.4	-0.2096586
202.6	0.7152246	202.6	0.6824381	202.6	0.7297705	202.6	0.766857	202.6	0.7263319	202.6	0.7539152	202.6	0.7709067	202.6	-0.2265938	202.6	-0.2081047	202.6	-0.2681693	202.6	-0.2248931	202.6	-0.2086787	202.6	-0.2201465	202.6	-0.2164647	202.6	-0.1770405	202.6	-0.2119196
202.8	0.7215006	202.8	0.6858494	202.8	0.7283565	202.8	0.7734773	202.8	0.7269665	202.8	0.7551342	202.8	0.7718584	202.8	-0.2287719	202.8	-0.2065975	202.8	-0.2723261	202.8	-0.2278236	202.8	-0.2110165	202.8	-0.2198033	202.8	-0.2101278	202.8	-0.1786061	202.8	-0.2084805
203	0.7234511	203	0.6902309	203	0.7331796	203	0.7712768	203	0.7317342	203	0.7557433	203	0.7759053	203	-0.2279702	203	-0.2093303	203	-0.2738076	203	-0.2243499	203	-0.2092487	203	-0.2184138	203	-0.2128803	203	-0.1796517	203	-0.212827
203.2	0.7249054	203.2	0.6901252	203.2	0.7330019	203.2	0.7688315	203.2	0.7301446	203.2	0.7570999	203.2	0.7795821	203.2	-0.226667	203.2	-0.2045655	203.2	-0.2736153	203.2	-0.2297334	203.2	-0.2089397	203.2	-0.2188745	203.2	-0.2133635	203.2	-0.1762009	203.2	-0.2132163
203.4	0.7285833	203.4	0.6892012	203.4	0.7355839	203.4	0.7751194	203.4	0.7307225	203.4	0.7597409	203.4	0.7750493	203.4	-0.2244124	203.4	-0.2108227	203.4	-0.272908	203.4	-0.2212787	203.4	-0.2085918	203.4	-0.2201207	203.4	-0.2148237	203.4	-0.1775385	203.4	-0.2131116
203.6	0.7261354	203.6	0.6889001	203.6	0.7391133	203.6	0.7736152	203.6	0.7320362	203.6	0.7652324	203.6	0.7848778	203.6	-0.2266836	203.6	-0.2096911	203.6	-0.2707387	203.6	-0.2279359	203.6	-0.2154106	203.6	-0.2177828	203.6	-0.2151849	203.6	-0.1826559	203.6	-0.2083514
203.81	0.7258865	203.81	0.6941267	203.81	0.7388428	203.81	0.7787442	203.81	0.7364058	203.81	0.760817	203.81	0.7786254	203.81	-0.2238113	203.8	-0.2057062	203.8	-0.2704107	203.8	-0.2272804	203.8	-0.2137997	203.8	-0.2188165	203.8	-0.2082173	203.8	-0.1761125	203.8	-0.2109399
204	0.7293543	204	0.6960623	204	0.7390026	204	0.7759367	204	0.7391695	204	0.7716678	204	0.7849173	204	-0.2249454	204	-0.2076104	204	-0.2703889	204	-0.2302129	204	-0.2106351	204	-0.2234592	204	-0.208467	204	-0.1758326	204	-0.2103477
204.2	0.7347602	204.2	0.6945869	204.2	0.743176	204.2	0.7833334	204.2	0.738902	204.2	0.7676082	204.2	0.7841846	204.2	-0.22188	204.2	-0.2085496	204.2	-0.2665112	204.2	-0.2260651	204.2	-0.2105401	204.2	-0.2193104	204.2	-0.210663	204.2	-0.1747694	204.2	-0.2100677
204.4	0.7347974	204.4	0.6963264	204.4	0.7433188	204.4	0.7814152	204.4	0.7384261	204.4	0.7713912	204.4	0.7865798	204.4	-0.224082	204.4	-0.2049964	204.4	-0.2685037	204.4	-0.225074	204.4	-0.209949	204.4	-0.2207399	204.4	-0.2131908	204.4	-0.1745378	204.4	-0.2084335
204.6	0.7372052	204.6	0.7007567	204.6	0.7473516	204.6	0.7812437	204.6	0.7421647	204.6	0.7680581	204.6	0.7910302	204.6	-0.2228413	204.6	-0.2077367	204.6	-0.2739367	204.6	-0.2244346	204.6	-0.2143013	204.6	-0.2202286	204.6	-0.2117308	204.6	-0.1764825	204.6	-0.2062884
204.8	0.7347848	204.8	0.6967548	204.8	0.7484114	204.8	0.7888463	204.8	0.7452286	204.8	0.7723696	204.8	0.7905025	204.8	-0.2271394	204.8	-0.2083199	204.8	-0.2675744	204.8	-0.2226765	204.8	-0.2069106	204.8	-0.2236459	204.8	-0.2119764	204.8	-0.1703707	204.8	-0.2071059
205	0.7367055	205	0.7014155	205	0.748704	205	0.7886568	205	0.7390963	205	0.7765045	205	0.7917886	205	-0.228586	205	-0.2065077	205	-0.2685598	205	-0.2266896	205	-0.2058447	205	-0.2168494	205	-0.2073705	205	-0.1726128	205	-0.2098498
205.2	0.7395627	205.2	0.7032285	205.2	0.7526864	205.2	0.7840526	205.2	0.7445108	205.2	0.7701345	205.2	0.7912158	205.2	-0.2272729	205.2	-0.2095736	205.2	-0.2687297	205.2	-0.2235328	205.2	-0.2105429	205.2	-0.2199681	205.2	-0.208969	205.2	-0.1723001	205.2	-0.2087828
205.4	0.7382864	205.4	0.7055539	205.4	0.7567139	205.4	0.787453	205.4	0.7491636	205.4	0.7764313	205.4	0.7950413	205.4	-0.2246357	205.4	-0.2069823	205.4	-0.2692978	205.4	-0.2205192	205.4	-0.2072194	205.4	-0.2187951	205.4	-0.209842	205.4	-0.1717757	205.4	-0.2107864
205.6	0.7391548	205.6	0.7028321	205.6	0.7535735	205.6	0.7895928	205.6	0.7492948	205.6	0.7778434	205.6	0.790195	205.6	-0.2266795	205.6	-0.2022324	205.6	-0.268295	205.6	-0.2239579	205.6	-0.2090961	205.6	-0.2195685	205.6	-0.2129932	205.6	-0.1721428	205.6	-0.2118108
205.8	0.7442588	205.8	0.7103449	205.8	0.7579015	205.8	0.7932427	205.8	0.7474596	205.8	0.7774207	205.8	0.7940477	205.8	-0.2237863	205.8	-0.2076728	205.8	-0.2675117	205.8	-0.2224054	205.8	-0.2051815	205.8	-0.2198324	205.8	-0.2095957	205.8	-0.1727203	205.8	-0.2084773
206	0.7479849	206	0.7080252	206	0.7542213	206	0.792289	206	0.7512968	206	0.7799158	206	0.7958428	206	-0.2247441	206	-0.2046156	206	-0.2667411	206	-0.2249929	206	-0.2095484	206	-0.2153803	206	-0.2088852	206	-0.1742761	206	-0.2071697
206.2	0.7442644	206.2	0.7117584	206.2	0.7568654	206.2	0.7966104	206.2	0.7504175	206.2	0.7833453	206.2	0.7989078	206.2	-0.2247488	206.2	-0.205489	206.2	-0.2669679	206.2	-0.2234478	206.2	-0.2073178	206.2	-0.2144528	206.2	-0.2088389	206.2	-0.1732025	206.2	-0.2118399
206.4	0.7448277	206.4	0.7120593	206.4	0.7573733	206.4	0.7979982	206.4	0.7530768	206.4	0.7829357	206.4	0.8009024	206.4	-0.2191208	206.4	-0.202202	206.4	-0.2667333	206.4	-0.2265797	206.4	-0.2081628	206.4	-0.2172511	206.4	-0.2139173	206.4	-0.1758887	206.4	-0.2082425
206.6	0.7463275	206.6	0.7161152	206.6	0.7614701	206.6	0.7952309	206.6	0.7600576	206.6	0.7855042	206.6	0.8012103	206.6	-0.2233274	206.6	-0.2042714	206.6	-0.2672563	206.6	-0.2259481	206.6	-0.211498	206.6	-0.2165132	206.6	-0.2100866	206.6	-0.1762414	206.6	-0.2090699
206.8	0.7479342	206.8	0.7154552	206.8	0.7637982	206.8	0.7948269	206.8	0.7539425	206.8	0.7857934	206.8	0.8079834	206.8	-0.2258484	206.8	-0.203563	206.8	-0.2637568	206.8	-0.2207078	206.8	-0.2077137	206.8	-0.2179812	206.8	-0.2110572	206.8	-0.1770752	206.8	-0.2054809
207	0.7454931	207	0.7152869	207	0.7579607	207	0.7995033	207	0.7609857	207	0.7861418	207	0.8072314	207	-0.225622	207	-0.2032735	207	-0.2682222	207	-0.2222646	207	-0.2061328	207	-0.2188139	207	-0.2111489	207	-0.173742	207	-0.2078207
207.2	0.7543739	207.2	0.7131024	207.2	0.762396	207.2	0.8052931	207.2	0.7568439	207.2	0.7858612	207.2	0.8035435	207.2	-0.2228083	207.2	-0.2070237	207.2	-0.265767	207.2	-0.221565	207.2	-0.212424	207.2	-0.21789	207.2	-0.2044212	207.2	-0.1712929	207.2	-0.2118085
207.4	0.7566569	207.4	0.7165464	207.4	0.7653641	207.4	0.8026171	207.4	0.7618665	207.4	0.7884753	207.4	0.8040191	207.4	-0.2245815	207.4	-0.2088531	207.4	-0.2642813	207.4	-0.2187415	207.4	-0.2090019	207.4	-0.2159892	207.4	-0.2106065	207.4	-0.1738654	207.4	-0.2110531
207.6	0.7557864	207.6	0.7155585	207.6	0.7655568	207.6	0.8112785	207.6	0.7610646	207.6	0.7936255	207.6	0.812188	207.6	-0.2232987	207.6	-0.2044985	207.6	-0.2682691	207.6	-0.2190335	207.6	-0.2085906	207.6	-0.2149598	207.6	-0.2089861	207.6	-0.1726287	207.6	-0.2056927
207.8	0.758412	207.8	0.7227234	207.8	0.7677873	207.8	0.8080502	207.8	0.760592	207.8	0.7943563	207.8	0.8090864	207.8	-0.2256467	207.8	-0.2076192	207.8	-0.2665318	207.8	-0.2174281	207.8	-0.2029037	207.8	-0.2187948	207.8	-0.2086529	207.8	-0.1729657	207.8	-0.2124574
208	0.7565867	208	0.7208319	208	0.7699216	208	0.8065582	208	0.7618665	208	0.7958602	208	0.8167073	208	-0.2265339	208	-0.2089748	208	-0.2624649	208	-0.2197627	208	-0.2071042	208	-0.2173677	208	-0.2048564	208	-0.168574	208	-0.2070606
208.2	0.7607265	208.2	0.724667	208.2	0.773391	208.2	0.8054557	208.2	0.7692566	208.2	0.7920941	208.2	0.8131427	208.2	-0.2237488	208.2	-0.2029241	208.2	-0.2667516	208.2	-0.2195216	208.2	-0.2040729	208.2	-0.2177835	208.2	-0.2083761	208.2	-0.1750376	208.2	-0.2046248
208.4	0.7601204	208.4	0.7276848	208.4	0.7706577	208.4	0.8138109	208.4	0.7635606	208.4	0.7973551	208.4	0.8151369	208.4	-0.2214843	208.4	-0.201309	208.4	-0.2683787	208.4	-0.2244445	208.4	-0.2043084	208.4	-0.2205804	208.4	-0.2067024	208.4	-0.1694213	208.4	-0.2067821
208.6	0.7593361	208.6	0.7250216	208.6	0.7708291	208.6	0.8131948	208.6	0.7705763	208.6	0.800473	208.6	0.8179117	208.6	-0.2265579	208.6	-0.2007674	208.6	-0.267818	208.6	-0.2193252	208.6	-0.2065966	208.6	-0.2181521	208.6	-0.2069842	208.6	-0.1707972	208.6	-0.2069079
208.8	0.7660701	208.8	0.7284358	208.8	0.7757196	208.8	0.8148373	208.8	0.770426	208.8	0.8006933	208.8	0.8223381	208.8	-0.2240657	208.8	-0.2046892	208.8	-0.2668267	208.8	-0.2191518	208.8	-0.2083941	208.8	-0.2207006	208.8	-0.2057954	208.8	-0.1738347	208.8	-0.2048188
209	0.7658222	209	0.7308924	209	0.7756786	209	0.8114309	209	0.7737436	209	0.8010994	209	0.8216446	209	-0.2227499	209	-0.2043116	209	-0.2668173	209	-0.216566	209	-0.2091614	209	-0.2159181	209	-0.2043142	209	-0.1702782	209	-0.2054102
209.2	0.766431	209.2	0.7327762	209.2	0.7757879	209.2	0.8101005	209.2	0.7725463	209.2	0.799973	209.2	0.82499	209.2	-0.2249277	209.2	-0.2059394	209.2	-0.2624742	209.2	-0.2210567	209.2	-0.1994209	209.2	-0.2122792	209.2	-0.2051319	209.2	-0.1649353	209.2	-0.2049357
209.4	0.7667447	209.4	0.7317722	209.4	0.7815088	209.4	0.8165544	209.4	0.7733508	209.4	0.803077	209.4	0.824816	209.4	-0.2196606	209.4	-0.2033838	209.4	-0.2651562	209.4	-0.2203501	209.4	-0.2026297	209.4	-0.217622	209.4	-0.2083054	209.4	-0.1729731	209.4	-0.2034944
209.6	0.7696068	209.6	0.7323411	209.6	0.7848243	209.6	0.8238433	209.6	0.7750017	209.6	0.8034193	209.6	0.8276184	209.6	-0.2246662	209.6	-0.1996106	209.6	-0.2677473	209.6	-0.2206526	209.6	-0.2074237	209.6	-0.2158976	209.6	-0.2085945	209.6	-0.1698805	209.6	-0.2066292
209.8	0.7711536	209.8	0.7355408	209.8	0.7817756	209.8	0.8189088	209.8	0.7755425	209.8	0.8008071	209.8	0.828382	209.8	-0.2242792	209.8	-0.2049177	209.8	-0.2651152	209.8	-0.2185112	209.8	-0.2045151	209.8	-0.2137971	209.8	-0.2062661	209.8	-0.1713683	209.8	-0.2052791
210	0.7718614	210	0.7366579	210	0.7828458	210	0.8262526	210	0.7791566	210	0.8110542	210	0.8203428	210	-0.2264751	210	-0.2027064	210	-0.2670941	210	-0.2178666	210	-0.2087381	210	-0.2110255	210	-0.2053813	210	-0.1666947	210	-0.205329
210.2	0.7717522	210.2	0.7383382	210.2	0.7778622	210.2	0.8228544	210.2	0.7783657	210.2	0.8045426	210.2	0.8275806	210.2	-0.2230966	210.2	-0.2005748	210.2	-0.26067	210.2	-0.2220362	210.2	-0.2067446	210.2	-0.2147598	210.2	-0.2026711	210.2	-0.1722328	210.2	-0.2041635
210.4	0.7736834	210.4	0.7411184	210.4	0.790223	210.4	0.8228464	210.4	0.7805543	210.4	0.8081036	210.4	0.825371	210.4	-0.2233579	210.4	-0.1997901	210.4	-0.2625819	210.4	-0.2142482	210.4	-0.2062767	210.4	-0.2136181	210.4	-0.2075876	210.4	-0.1751512	210.4	-0.2052992
210.6	0.7805954	210.6	0.7429267	210.6	0.7896025	210.6	0.823368	210.6	0.7816436	210.6	0.8059918	210.6	0.8309702	210.6	-0.2197578	210.6	-0.201508	210.6	-0.2642958	210.6	-0.2197094	210.6	-0.2036681	210.6	-0.2143918	210.6	-0.2071774	210.6	-0.1693106	210.6	-0.2087088
210.8	0.7729979	210.8	0.7464077	210.8	0.7885746	210.8	0.8277513	210.8	0.7810758	210.8	0.813856	210.8	0.8290231	210.8	-0.21458	210.8	-0.20263	210.8	-0.2638907	210.8	-0.2168176	210.8	-0.1997782	210.8	-0.2135596	210.8	-0.2028665	210.8	-0.1720365	210.8	-0.2053234
211	0.7745309	211	0.7408708	211	0.7911358	211	0.8297593	211	0.7834093	211	0.8143042	211	0.8308773	211	-0.220684	211	-0.203167	211	-0.2669561	211	-0.2189501	211	-0.205655	211	-0.2107948	211	-0.2074472	211	-0.1700808	211	-0.2034004
211.2	0.7792027	211.2	0.7463596	211.2	0.7892472	211.2	0.8258298	211.2	0.7787182	211.2	0.8134631	211.2	0.8349428	211.2	-0.2210262	211.2	-0.2010771	211.2	-0.2681674	211.2	-0.2187494	211.2	-0.2040687	211.2	-0.212191	211.2	-0.2065358	211.2	-0.1688245	211.2	-0.2111209
211.4	0.781229	211.4	0.7431994	211.4	0.7959163	211.4	0.8307406	211.4	0.7888054	211.4	0.8132175	211.4	0.8338482	211.4	-0.2226977	211.4	-0.1996942	211.4	-0.262889	211.4	-0.2180247	211.4	-0.2013329	211.4	-0.2125551	211.4	-0.2006717	211.4	-0.1670538	211.4	-0.2025335
211.6	0.7847694	211.6	0.7506102	211.6	0.7947572	211.6	0.8330711	211.6	0.7907528	211.6	0.8216562	211.6	0.8392404	211.6	-0.2197321	211.6	-0.2044498	211.6	-0.2643524	211.6	-0.2183954	211.6	-0.2003638	211.6	-0.2118649	211.6	-0.1996933	211.6	-0.168442	211.6	-0.2038436
211.8	0.7788956	211.8	0.7492619	211.8	0.7975737	211.8	0.8368196	211.8	0.7876418	211.8	0.8174749	211.8	0.8324426	211.8	-0.2227189	211.8	-0.1975658	211.8	-0.2634954	211.8	-0.2180172	211.8	-0.2009493	211.8	-0.2163292	211.8	-0.208388	211.8	-0.1719061	211.8	-0.2072694
212	0.7848454	212	0.7462456	212	0.7984037	212	0.8323375	212	0.788312	212	0.8126554	212	0.8400632	212	-0.2219129	212	-0.1993525	212	-0.2633717	212	-0.2193572	212	-0.2043578	212	-0.2119036	212	-0.2063336	212	-0.1712322	212	-0.2046172
212.2	0.7838129	212.2	0.7490495	212.2	0.796697	212.2	0.8354988	212.2	0.7894061	212.2	0.82171	212.2	0.8425392	212.2	-0.2188052	212.2	-0.2049194	212.2	-0.2659763	212.2	-0.2213992	212.2	-0.2043646	212.2	-0.2141542	212.2	-0.2030049	212.2	-0.1679306	212.2	-0.2072829
212.4	0.7879204	212.4	0.754903	212.4	0.7976528	212.4	0.8417937	212.4	0.7976722	212.4	0.8235426	212.4	0.8414999	212.4	-0.2229164	212.4	-0.2003188	212.4	-0.2636815	212.4	-0.2176642	212.4	-0.1991906	212.4	-0.2099856	212.4	-0.2012522	212.4	-0.1674736	212.4	-0.2109836
212.6	0.7858285	212.6	0.7553145	212.6	0.7986559	212.6	0.8418872	212.6	0.7926419	212.6	0.82459	212.6	0.8412579	212.6	-0.2229508	212.6	-0.1998994	212.6	-0.2609619	212.6	-0.2176521	212.6	-0.2031653	212.6	-0.2072756	212.6	-0.2031015	212.6	-0.1727553	212.6	-0.2067576
212.8	0.7902544	212.8	0.7551365	212.8	0.7972334	212.8	0.8419643	212.8	0.7959059	212.8	0.8272867	212.8	0.8436174	212.8	-0.2209706	212.8	-0.1998907	212.8	-0.2591645	212.8	-0.2145448	212.8	-0.205154	212.8	-0.2117315	212.8	-0.2038336	212.8	-0.1706315	212.8	-0.2087152
213	0.7873235	213	0.7566882	213	0.80197	213	0.8391385	213	0.799381	213	0.826152	213	0.8435056	213	-0.2213401	213	-0.2002691	213	-0.2631143	213	-0.2190615	213	-0.2091569	213	-0.2111043	213	-0.2029423	213	-0.1714443	213	-0.2045849
213.2	0.7905855	213.2	0.7522115	213.2	0.803553	213.2	0.8425096	213.2	0.7966892	213.2	0.8255962	213.2	0.8443482	213.2	-0.2187248	213.2	-0.1975501	213.2	-0.2610455	213.2	-0.2191729	213.2	-0.1987159	213.2	-0.2090969	213.2	-0.2044784	213.2	-0.167803	213.2	-0.2019649
213.4	0.7937294	213.4	0.7609967	213.4	0.8104957	213.4	0.844539	213.4	0.7980673	213.4	0.8262656	213.4	0.8481966	213.4	-0.2169577	213.41	-0.2023904	213.41	-0.262328	213.41	-0.214983	213.41	-0.2027708	213.41	-0.2128832	213.41	-0.1989165	213.41	-0.1695423	213.41	-0.2050552
213.6	0.7922444	213.6	0.7629794	213.6	0.8051634	213.6	0.8412694	213.6	0.8007339	213.6	0.8295904	213.6	0.8473188	213.6	-0.2166191	213.6	-0.2003842	213.6	-0.2585	213.6	-0.2178609	213.6	-0.203282	213.6	-0.2119523	213.6	-0.2011768	213.6	-0.1694868	213.6	-0.2013535
213.8	0.7922719	213.8	0.7596215	213.8	0.8086966	213.8	0.8446565	213.8	0.8022903	213.8	0.8336739	213.8	0.8518047	213.8	-0.2127034	213.8	-0.1981273	213.8	-0.2621758	213.8	-0.2121446	213.8	-0.2055741	213.8	-0.2137586	213.8	-0.2025924	213.8	-0.1673598	213.8	-0.2057827
214	0.7950656	214	0.7650809	214	0.8114829	214	0.8453181	214	0.8050566	214	0.830752	214	0.8497458	214	-0.217959	214	-0.1967957	214	-0.2645733	214	-0.2149983	214	-0.1987246	214	-0.207898	214	-0.2035084	214	-0.1702103	214	-0.2074424
214.2	0.8016374	214.2	0.7620834	214.2	0.8120924	214.2	0.8455106	214.2	0.8087102	214.2	0.8313763	214.2	0.8528799	214.2	-0.2178886	214.2	-0.1976202	214.2	-0.2569113	214.2	-0.219847	214.2	-0.2031207	214.2	-0.2063343	214.2	-0.2005199	214.2	-0.1667806	214.2	-0.2024273
214.4	0.8009888	214.4	0.767884	214.4	0.812705	214.4	0.849861	214.4	0.8055613	214.4	0.8366355	214.4	0.8528115	214.4	-0.2209833	214.4	-0.2024575	214.4	-0.2561814	214.4	-0.2161986	214.4	-0.1983768	214.4	-0.2110105	214.4	-0.2023329	214.4	-0.1709596	214.4	-0.2033621
214.6	0.8004224	214.6	0.767774	214.6	0.815755	214.6	0.8483355	214.6	0.8087876	214.6	0.8352774	214.6	0.8556821	214.6	-0.219715	214.6	-0.2013891	214.6	-0.2626646	214.6	-0.2135044	214.6	-0.1988013	214.6	-0.2133748	214.6	-0.1990151	214.6	-0.1652888	214.6	-0.2047726
214.8	0.8003746	214.8	0.7681447	214.8	0.8130342	214.8	0.8496765	214.8	0.8064216	214.8	0.8390891	214.8	0.8615467	214.8	-0.2223306	214.8	-0.1985843	214.8	-0.261172	214.8	-0.2150365	214.8	-0.1987999	214.8	-0.2118272	214.8	-0.1969274	214.8	-0.1656859	214.8	-0.2056322
215	0.800831	215	0.7714054	215	0.8173232	215	0.8515484	215	0.8141153	215	0.8377011	215	0.8606771	215	-0.2194669	215	-0.2004253	215	-0.2587283	215	-0.2115045	215	-0.2021729	215	-0.2146394	215	-0.2002294	215	-0.1656998	215	-0.2025709
215.2	0.8064375	215.2	0.7713708	215.2	0.8164535	215.2	0.8501405	215.2	0.8133785	215.2	0.8363187	215.2	0.8585522	215.2	-0.2189346	215.2	-0.1985337	215.2	-0.2620827	215.2	-0.2168031	215.2	-0.2002158	215.2	-0.2118507	215.2	-0.200189	215.2	-0.1628407	215.2	-0.2056701
215.4	0.8031613	215.4	0.7695722	215.4	0.8165076	215.4	0.8562876	215.4	0.8143618	215.4	0.8415313	215.4	0.8650365	215.4	-0.2183378	215.4	-0.1982701	215.4	-0.2590026	215.4	-0.2149974	215.4	-0.2006037	215.4	-0.2069771	215.4	-0.201109	215.4	-0.1636628	215.4	-0.203732
215.6	0.8066129	215.6	0.7729448	215.6	0.8172037	215.6	0.8597656	215.6	0.8112574	215.6	0.8442958	215.6	0.8626679	215.6	-0.2179527	215.6	-0.2013699	215.6	-0.2549604	215.6	-0.2093524	215.6	-0.1993817	215.6	-0.2113298	215.6	-0.2014827	215.6	-0.1685722	215.6	-0.202045
215.8	0.8107116	215.8	0.7723782	215.8	0.8194147	215.8	0.8584979	215.8	0.8158206	215.8	0.8390078	215.8	0.861926	215.8	-0.2168073	215.8	-0.1980385	215.8	-0.2565247	215.8	-0.2135944	215.8	-0.2005522	215.8	-0.2066198	215.8	-0.2022394	215.8	-0.165095	215.8	-0.2000453
216	0.8146247	216	0.7720898	216	0.8207387	216	0.8611629	216	0.8201804	216	0.8452639	216	0.8663443	216	-0.2178432	216	-0.196298	216	-0.2596387	216	-0.2125189	216	-0.2015052	216	-0.209175	216	-0.1989676	216	-0.1637297	216	-0.2037687
216.2	0.8148553	216.2	0.7747431	216.2	0.8229413	216.2	0.8574378	216.2	0.8158838	216.2	0.8482826	216.2	0.8659484	216.2	-0.2178363	216.2	-0.1990717	216.2	-0.2622072	216.2	-0.210964	216.2	-0.203096	216.2	-0.2110518	216.2	-0.1997018	216.2	-0.1660939	216.2	-0.2063536
216.4	0.814392	216.4	0.7764701	216.4	0.8260825	216.4	0.8582122	216.4	0.8201188	216.4	0.8509595	216.4	0.8669094	216.4	-0.2195199	216.4	-0.1981008	216.4	-0.2584647	216.4	-0.2136209	216.4	-0.1998452	216.4	-0.2076287	216.4	-0.2031203	216.4	-0.1660268	216.4	-0.2017105
216.6	0.8099147	216.6	0.7754158	216.6	0.829656	216.6	0.8617867	216.6	0.8137819	216.6	0.8484921	216.6	0.8706429	216.6	-0.2161984	216.6	-0.1976681	216.6	-0.2547413	216.6	-0.2127411	216.6	-0.1969676	216.6	-0.2039717	216.6	-0.2027687	216.6	-0.1654577	216.6	-0.2049547
216.8	0.8137655	216.8	0.7796075	216.8	0.8219978	216.8	0.8699242	216.8	0.814825	216.8	0.8530966	216.8	0.8716152	216.8	-0.2173509	216.8	-0.2034228	216.8	-0.264276	216.8	-0.2167581	216.8	-0.1956202	216.8	-0.2111387	216.8	-0.2020408	216.8	-0.1638768	216.8	-0.1961937
217	0.8139302	217	0.7807221	217	0.8296068	217	0.8659308	217	0.8238829	217	0.8513061	217	0.8751571	217	-0.2205958	217.01	-0.197575	217.01	-0.2557725	217.01	-0.2144567	217.01	-0.19857	217.01	-0.211946	217.01	-0.1992005	217.01	-0.1640183	217.01	-0.2033259
217.2	0.8119547	217.2	0.7837452	217.2	0.8281951	217.2	0.8607578	217.2	0.8236316	217.2	0.8516845	217.2	0.8714191	217.2	-0.2181161	217.2	-0.1977231	217.2	-0.2593452	217.2	-0.2145626	217.2	-0.2019211	217.2	-0.2083259	217.2	-0.1962685	217.2	-0.1686081	217.2	-0.1997809
217.4	0.8126131	217.4	0.7821847	217.4	0.8254986	217.4	0.8650513	217.4	0.8216901	217.4	0.8544106	217.4	0.8692781	217.4	-0.2144879	217.4	-0.1983721	217.4	-0.261408	217.4	-0.2132306	217.4	-0.1991388	217.4	-0.2134413	217.4	-0.195529	217.4	-0.1670603	217.4	-0.201067
217.6	0.8191202	217.6	0.7833214	217.6	0.8302082	217.6	0.8695189	217.6	0.8290058	217.6	0.8566544	217.6	0.8740478	217.6	-0.2164441	217.6	-0.1957403	217.6	-0.2582873	217.6	-0.2133777	217.6	-0.2002814	217.6	-0.2080101	217.6	-0.1963314	217.6	-0.1611683	217.6	-0.1992577
217.8	0.822275	217.8	0.776404	217.8	0.8298354	217.8	0.8692095	217.8	0.8257095	217.8	0.8597031	217.8	0.8749338	217.8	-0.2145211	217.8	-0.1928261	217.8	-0.2549746	217.8	-0.2140198	217.8	-0.1979252	217.8	-0.2056759	217.8	-0.2014919	217.8	-0.1624352	217.8	-0.2009792
218	0.8205178	218	0.7851639	218	0.8373711	218	0.8740641	218	0.827686	218	0.8573849	218	0.8769013	218	-0.2157473	218	-0.194579	218	-0.2629369	218	-0.2162934	218	-0.1962622	218	-0.2083585	218	-0.1982758	218	-0.1634082	218	-0.2016424
218.2	0.8219543	218.2	0.7912859	218.2	0.8340752	218.2	0.8746688	218.2	0.829725	218.2	0.8558845	218.2	0.8809698	218.2	-0.2127966	218.2	-0.1955221	218.2	-0.2569289	218.2	-0.2098969	218.2	-0.1976941	218.2	-0.2068302	218.2	-0.1974966	218.2	-0.1635907	218.2	-0.2024426
218.4	0.8241628	218.4	0.790218	218.4	0.8366394	218.4	0.871528	218.4	0.8307338	218.4	0.8582121	218.4	0.8803489	218.4	-0.2168003	218.4	-0.1967192	218.4	-0.259966	218.4	-0.2120729	218.4	-0.1950104	218.4	-0.2071965	218.4	-0.1960423	218.4	-0.1664809	218.4	-0.2012276
218.6	0.8238801	218.6	0.7883415	218.6	0.835188	218.6	0.8718116	218.6	0.8302256	218.6	0.8580744	218.6	0.8776755	218.6	-0.2160792	218.6	-0.1913554	218.6	-0.2527202	218.6	-0.2100007	218.6	-0.1983497	218.6	-0.2096635	218.6	-0.203537	218.6	-0.1607384	218.6	-0.201877
218.8	0.823952	218.8	0.7925956	218.8	0.8316994	218.8	0.875396	218.8	0.8304232	218.8	0.8614533	218.8	0.8853046	218.8	-0.2148488	218.8	-0.1938883	218.8	-0.2565385	218.8	-0.2050296	218.8	-0.1982605	218.8	-0.2055521	218.8	-0.2004256	218.8	-0.1615038	218.8	-0.2025684
219	0.8258104	219	0.7954291	219	0.8388019	219	0.8761915	219	0.832683	219	0.8621167	219	0.8842549	219	-0.214431	219	-0.1916821	219	-0.257483	219	-0.2079192	219	-0.1974107	219	-0.2054776	219	-0.2002742	219	-0.1634397	219	-0.202503
219.2	0.8254688	219.2	0.7910095	219.2	0.8398628	219.2	0.8796349	219.2	0.8324201	219.2	0.8585257	219.2	0.8824887	219.2	-0.2166703	219.2	-0.1978785	219.2	-0.2626323	219.2	-0.2102652	219.2	-0.1966698	219.2	-0.2096511	219.2	-0.1957318	219.2	-0.1618424	219.2	-0.1985376
219.4	0.8360301	219.4	0.795165	219.4	0.8421862	219.4	0.8817722	219.4	0.8372617	219.4	0.8645614	219.4	0.8852063	219.4	-0.2158367	219.4	-0.197729	219.4	-0.2571329	219.4	-0.2112554	219.4	-0.1968313	219.4	-0.2038431	219.4	-0.1942032	219.4	-0.165548	219.4	-0.1993143
219.6	0.8297408	219.6	0.7960802	219.6	0.8422621	219.6	0.880044	219.6	0.8358603	219.6	0.8612708	219.6	0.8883544	219.6	-0.2158237	219.6	-0.1943346	219.6	-0.2585592	219.6	-0.2111854	219.6	-0.202246	219.6	-0.2036792	219.6	-0.1979976	219.6	-0.1633354	219.6	-0.1969678
219.8	0.8302516	219.8	0.7950531	219.8	0.8460398	219.8	0.8767784	219.8	0.8361802	219.8	0.8680781	219.8	0.8883345	219.8	-0.2137275	219.8	-0.1927028	219.8	-0.256059	219.8	-0.2112756	219.8	-0.1997119	219.8	-0.2089671	219.8	-0.1961109	219.8	-0.1617405	219.8	-0.1978975
220	0.8338442	220	0.7936694	220	0.8423489	220	0.8867205	220	0.8397949	220	0.866175	220	0.8868205	220	-0.2145024	220	-0.1933382	220	-0.2569889	220	-0.2124699	220	-0.1955469	220	-0.2058652	220	-0.1989055	220	-0.1597623	220	-0.1956949
220.2	0.8319861	220.2	0.8038806	220.2	0.8470193	220.2	0.8871082	220.2	0.8384504	220.2	0.8693643	220.2	0.8870944	220.2	-0.2170414	220.2	-0.1891155	220.2	-0.2597518	220.2	-0.2084476	220.2	-0.1974376	220.2	-0.2018147	220.2	-0.197294	220.2	-0.1631863	220.2	-0.1994415
220.4	0.8348485	220.4	0.7969618	220.4	0.8461995	220.4	0.8838924	220.4	0.8405454	220.4	0.8743703	220.4	0.8906015	220.4	-0.2142772	220.4	-0.1959751	220.4	-0.2580824	220.4	-0.2126398	220.4	-0.1948997	220.4	-0.2040489	220.4	-0.1950711	220.4	-0.1645908	220.4	-0.1990584
220.6	0.8400977	220.6	0.8045024	220.6	0.8467757	220.6	0.8861499	220.6	0.8422444	220.6	0.8693909	220.6	0.8906451	220.6	-0.2162707	220.6	-0.1904467	220.6	-0.2596212	220.6	-0.212352	220.6	-0.190574	220.6	-0.2030316	220.6	-0.1931821	220.6	-0.1611055	220.6	-0.1952307
220.8	0.8364216	220.8	0.8047056	220.8	0.8504347	220.8	0.8863034	220.8	0.8412293	220.8	0.8683369	220.8	0.8920408	220.8	-0.2131949	220.8	-0.1963613	220.8	-0.2559284	220.8	-0.212162	220.8	-0.1947158	220.8	-0.2058836	220.8	-0.1961424	220.8	-0.1615842	220.8	-0.193227
221	0.8392945	221	0.8028529	221	0.8477349	221	0.8870394	221	0.8457903	221	0.8717719	221	0.8917034	221	-0.2107416	221	-0.1912136	221	-0.2582651	221	-0.2079876	221	-0.195981	221	-0.2027558	221	-0.198024	221	-0.1609612	221	-0.2013761
221.2	0.8379052	221.2	0.804244	221.2	0.8503715	221.2	0.8918292	221.2	0.8448734	221.2	0.8761224	221.2	0.8959134	221.2	-0.2188773	221.2	-0.1970428	221.2	-0.2523414	221.2	-0.2097655	221.2	-0.1979184	221.2	-0.2070169	221.2	-0.1942381	221.2	-0.1614856	221.2	-0.1993983
221.4	0.8421296	221.4	0.805168	221.4	0.8509731	221.4	0.8916422	221.4	0.8458369	221.4	0.8742741	221.4	0.8995664	221.4	-0.2139531	221.4	-0.1904054	221.4	-0.2539066	221.4	-0.2121639	221.4	-0.1925372	221.4	-0.2037321	221.4	-0.1959153	221.4	-0.1638951	221.4	-0.1943728
221.6	0.8403858	221.6	0.8042195	221.6	0.8536107	221.6	0.8965985	221.6	0.8534326	221.6	0.8786011	221.6	0.8977924	221.6	-0.2131156	221.6	-0.1964008	221.6	-0.2506417	221.6	-0.215202	221.6	-0.1956702	221.6	-0.2051095	221.6	-0.1934389	221.6	-0.1594667	221.6	-0.1898865
221.8	0.8440629	221.8	0.8097749	221.8	0.8573732	221.8	0.892205	221.8	0.8505255	221.8	0.8746657	221.8	0.900304	221.8	-0.2133229	221.8	-0.1929124	221.8	-0.2556944	221.8	-0.2118218	221.8	-0.1949988	221.8	-0.2025275	221.8	-0.1919635	221.8	-0.1594044	221.8	-0.200485
222	0.8443912	222	0.8050267	222	0.8542142	222	0.8959705	222	0.8516063	222	0.8788593	222	0.897837	222	-0.2132261	222.01	-0.1932574	222.01	-0.2568499	222.01	-0.2118904	222.01	-0.1920798	222.01	-0.2077617	222.01	-0.1899895	222.01	-0.1591538	222.01	-0.1985242
222.2	0.8428022	222.2	0.8119115	222.2	0.8611901	222.2	0.8951297	222.2	0.8535348	222.2	0.8819663	222.2	0.8981439	222.2	-0.2104168	222.2	-0.1918619	222.2	-0.2597909	222.2	-0.2110061	222.2	-0.1939964	222.2	-0.2058529	222.2	-0.1950531	222.2	-0.1579481	222.2	-0.1996443
222.4	0.843535	222.4	0.8145732	222.4	0.8565491	222.4	0.8943682	222.4	0.8501973	222.4	0.8786035	222.4	0.9010762	222.4	-0.2126061	222.4	-0.1907549	222.4	-0.252868	222.4	-0.2058193	222.4	-0.1971664	222.4	-0.2065931	222.4	-0.1915448	222.4	-0.1593564	222.4	-0.1961175
222.6	0.849371	222.6	0.8091816	222.6	0.8597246	222.6	0.8935915	222.6	0.8566114	222.6	0.8826522	222.6	0.9093868	222.6	-0.2169201	222.6	-0.1947935	222.6	-0.2533832	222.6	-0.207827	222.6	-0.1950914	222.6	-0.2040528	222.6	-0.1989068	222.6	-0.1525398	222.6	-0.1949786
222.8	0.8490378	222.8	0.8120642	222.8	0.8611555	222.8	0.8970094	222.8	0.8537704	222.8	0.8827513	222.8	0.9052474	222.8	-0.2133122	222.8	-0.1882744	222.8	-0.2529684	222.8	-0.2081917	222.8	-0.194276	222.8	-0.2026788	222.8	-0.1936632	222.8	-0.1595678	222.8	-0.1955896
223	0.8502381	223	0.8133757	223	0.8619134	223	0.8990587	223	0.8487471	223	0.8854245	223	0.9040197	223	-0.2140365	223	-0.1898294	223	-0.2558203	223	-0.2090441	223	-0.1946396	223	-0.2055855	223	-0.1946408	223	-0.1616804	223	-0.1964273
223.2	0.845011	223.2	0.8180771	223.2	0.8599276	223.2	0.8989755	223.2	0.8571859	223.2	0.8842478	223.2	0.9120846	223.2	-0.2163463	223.2	-0.1916694	223.2	-0.2506534	223.2	-0.2084319	223.2	-0.1949964	223.2	-0.2008363	223.2	-0.1929845	223.2	-0.1627053	223.2	-0.1986113
223.4	0.8455271	223.4	0.8141232	223.4	0.8635036	223.4	0.8999249	223.4	0.8574153	223.4	0.8876997	223.4	0.9044117	223.4	-0.2160387	223.4	-0.1972059	223.4	-0.2572473	223.4	-0.2077554	223.4	-0.1907355	223.4	-0.2027785	223.4	-0.1939571	223.4	-0.1626568	223.4	-0.1917032
223.6	0.8503624	223.6	0.8159958	223.6	0.8651778	223.6	0.8973136	223.6	0.8581579	223.6	0.8860925	223.6	0.9081305	223.6	-0.2158793	223.6	-0.1890774	223.6	-0.2511563	223.6	-0.2096395	223.6	-0.1915722	223.6	-0.2050293	223.6	-0.1920606	223.6	-0.1611865	223.6	-0.2021644
223.8	0.8539428	223.8	0.8216491	223.8	0.8609683	223.8	0.9016483	223.8	0.8597237	223.8	0.8872105	223.8	0.9116145	223.8	-0.2103515	223.8	-0.189209	223.8	-0.2526093	223.8	-0.201553	223.8	-0.1917396	223.8	-0.2024351	223.8	-0.1908278	223.8	-0.1582187	223.8	-0.1977321
224	0.8524463	224	0.8226339	224	0.865317	224	0.9076114	224	0.8608848	224	0.8882653	224	0.9063919	224	-0.213845	224	-0.1904122	224	-0.2545789	224	-0.2085731	224	-0.1927706	224	-0.20184	224	-0.1976684	224	-0.1591634	224	-0.1989885
224.2	0.8562684	224.2	0.8249789	224.2	0.8651484	224.2	0.9024235	224.2	0.8622418	224.2	0.8886552	224.2	0.9107593	224.2	-0.2141086	224.2	-0.188899	224.2	-0.2514791	224.2	-0.2038272	224.2	-0.1903131	224.2	-0.2016991	224.2	-0.1927893	224.2	-0.1602354	224.2	-0.1979878
224.4	0.859496	224.4	0.819561	224.4	0.8617537	224.4	0.9104771	224.4	0.8638314	224.4	0.8922455	224.4	0.9119154	224.4	-0.2129172	224.4	-0.1888976	224.4	-0.2565309	224.4	-0.206334	224.4	-0.1912743	224.4	-0.20362	224.4	-0.1945921	224.4	-0.1649408	224.4	-0.1962348
224.6	0.8519078	224.6	0.8227828	224.6	0.8685952	224.6	0.9075876	224.6	0.8638334	224.6	0.8904221	224.6	0.9138184	224.6	-0.2148614	224.6	-0.1940687	224.6	-0.246578	224.6	-0.2100629	224.6	-0.1921547	224.6	-0.2035779	224.6	-0.1939358	224.6	-0.1587717	224.6	-0.2009624
224.8	0.8579226	224.8	0.8254316	224.8	0.8697021	224.8	0.9052005	224.8	0.8657528	224.8	0.8910961	224.8	0.9113757	224.8	-0.2132908	224.8	-0.193193	224.8	-0.2514606	224.8	-0.2041654	224.8	-0.1950738	224.8	-0.2038006	224.8	-0.1924324	224.8	-0.1547202	224.8	-0.196262
225	0.85146	225	0.8246672	225	0.8724	225	0.9121897	225	0.8618017	225	0.8965867	225	0.9162275	225	-0.2155281	225	-0.1899663	225	-0.2488896	225	-0.2073973	225	-0.1909084	225	-0.2038792	225	-0.1901123	225	-0.1556655	225	-0.1942057
225.2	0.8564438	225.2	0.8281569	225.2	0.8731077	225.2	0.9179773	225.2	0.8672317	225.2	0.8945823	225.2	0.9190857	225.2	-0.2165594	225.2	-0.1894754	225.2	-0.2527114	225.2	-0.2080909	225.2	-0.1984974	225.2	-0.2022087	225.2	-0.1985706	225.2	-0.1573157	225.2	-0.1956141
225.4	0.8630319	225.4	0.824659	225.4	0.8746295	225.4	0.9063944	225.4	0.8671697	225.4	0.8970651	225.4	0.9170337	225.4	-0.2132423	225.4	-0.1895458	225.4	-0.2491703	225.4	-0.2063246	225.4	-0.1919811	225.4	-0.1988143	225.4	-0.1942925	225.4	-0.1559507	225.4	-0.1939036
225.6	0.8632568	225.6	0.834552	225.6	0.8742608	225.6	0.9154028	225.6	0.8683949	225.6	0.8937002	225.6	0.9165941	225.6	-0.2168259	225.6	-0.1881392	225.6	-0.2546857	225.6	-0.2048611	225.6	-0.1921969	225.6	-0.2011628	225.6	-0.1924803	225.6	-0.1581023	225.6	-0.1914609
225.8	0.8622466	225.8	0.8303016	225.8	0.8758802	225.8	0.9140219	225.8	0.8676457	225.8	0.8960389	225.8	0.918575	225.8	-0.2092521	225.8	-0.1866316	225.8	-0.249798	225.8	-0.204828	225.8	-0.1916346	225.8	-0.1997218	225.8	-0.1915469	225.8	-0.155951	225.8	-0.1965511
226	0.8624244	226	0.8337089	226	0.8780395	226	0.9153659	226	0.8726447	226	0.8988875	226	0.9232591	226	-0.2121531	226	-0.1891813	226	-0.2490871	226	-0.2077903	226	-0.1922045	226	-0.1992775	226	-0.1928853	226	-0.1545571	226	-0.1921583
226.2	0.8655068	226.2	0.8309304	226.2	0.8792203	226.2	0.9157594	226.2	0.8698444	226.2	0.8982954	226.2	0.9194369	226.2	-0.2093852	226.2	-0.1904918	226.2	-0.2496725	226.2	-0.2032781	226.2	-0.1914273	226.2	-0.2010178	226.2	-0.1913	226.2	-0.1545865	226.2	-0.1963784
226.4	0.8681705	226.4	0.831039	226.4	0.8795705	226.4	0.9171646	226.4	0.8725801	226.4	0.902477	226.4	0.9194941	226.4	-0.2112896	226.4	-0.1932964	226.4	-0.2524762	226.4	-0.198047	226.4	-0.1880642	226.4	-0.2021907	226.4	-0.1933158	226.4	-0.1594756	226.4	-0.1941963
226.6	0.8670257	226.6	0.8352249	226.6	0.8818856	226.6	0.9171649	226.6	0.8724977	226.6	0.9025822	226.6	0.9195455	226.6	-0.2133315	226.6	-0.1922939	226.6	-0.2537777	226.6	-0.2026414	226.6	-0.1922438	226.6	-0.1982493	226.6	-0.1910765	226.6	-0.1598306	226.6	-0.191756
226.8	0.8646656	226.8	0.8299578	226.8	0.8844259	226.8	0.924598	226.8	0.8727371	226.8	0.9022173	226.8	0.9253776	226.8	-0.2104376	226.8	-0.1932306	226.8	-0.250733	226.8	-0.2086799	226.8	-0.1912062	226.8	-0.2012634	226.8	-0.1880716	226.8	-0.1608348	226.8	-0.1918389
227	0.8724024	227	0.8315336	227	0.8796156	227	0.9254369	227	0.8743167	227	0.9063593	227	0.9291869	227	-0.207893	227	-0.1878444	227	-0.2513788	227	-0.2048012	227	-0.1876049	227	-0.2009541	227	-0.1911056	227	-0.1638683	227	-0.195238
227.2	0.8723419	227.2	0.8393409	227.2	0.8827991	227.2	0.9217072	227.2	0.8784901	227.2	0.9045417	227.2	0.9271048	227.2	-0.2041217	227.2	-0.1882806	227.2	-0.2529545	227.2	-0.2044611	227.2	-0.1938879	227.2	-0.2061699	227.2	-0.1925147	227.2	-0.1582775	227.2	-0.1955192
227.4	0.8669267	227.4	0.8345264	227.4	0.8805901	227.4	0.9230479	227.4	0.8811672	227.4	0.9048277	227.4	0.9293342	227.4	-0.2093126	227.4	-0.1890659	227.4	-0.2507184	227.4	-0.2039149	227.4	-0.1895324	227.4	-0.2023984	227.4	-0.1899772	227.4	-0.154396	227.4	-0.1959899
227.6	0.8747187	227.6	0.8373606	227.6	0.8833297	227.6	0.924289	227.6	0.8803338	227.6	0.9062316	227.6	0.9324047	227.6	-0.2101223	227.6	-0.1864532	227.6	-0.2515888	227.6	-0.1991466	227.6	-0.1925668	227.6	-0.1984361	227.6	-0.1892986	227.6	-0.1578602	227.6	-0.1938374
227.8	0.8726393	227.8	0.8411418	227.8	0.8840214	227.8	0.9232213	227.8	0.8808938	227.8	0.9034403	227.8	0.9315125	227.8	-0.2120245	227.8	-0.1911269	227.8	-0.2484458	227.8	-0.2020788	227.8	-0.1915095	227.8	-0.200396	227.8	-0.1925727	227.8	-0.159566	227.8	-0.1931574
228	0.8724547	228	0.8397272	228	0.8864722	228	0.9209713	228	0.8765762	228	0.9091959	228	0.9247185	228	-0.2169745	228	-0.1878686	228	-0.2491143	228	-0.2050493	228	-0.1912087	228	-0.1983357	228	-0.1870653	228	-0.1578772	228	-0.1939924
228.2	0.8706076	228.2	0.8443239	228.2	0.8846979	228.2	0.9297814	228.2	0.8849061	228.2	0.9051991	228.2	0.931696	228.2	-0.20855	228.2	-0.1898804	228.2	-0.2511118	228.2	-0.2067248	228.2	-0.1915104	228.2	-0.2046652	228.2	-0.1922301	228.2	-0.1495845	228.2	-0.1930951
228.4	0.8767458	228.4	0.8406508	228.4	0.8849455	228.4	0.9258686	228.4	0.8787746	228.4	0.9079618	228.4	0.9322156	228.4	-0.2127005	228.4	-0.1823334	228.4	-0.252278	228.4	-0.2037156	228.4	-0.1904148	228.4	-0.1998837	228.4	-0.1884475	228.4	-0.1566583	228.4	-0.1938137
228.6	0.8796694	228.6	0.8421096	228.6	0.8835972	228.6	0.9235364	228.6	0.8848779	228.6	0.9087985	228.6	0.9317312	228.6	-0.2094282	228.6	-0.1802887	228.6	-0.2495884	228.6	-0.2049614	228.6	-0.1880163	228.6	-0.2006552	228.6	-0.188935	228.6	-0.1539988	228.6	-0.1942073
228.8	0.8790386	228.8	0.8463965	228.8	0.8919772	228.8	0.925219	228.8	0.885334	228.8	0.9098636	228.8	0.9378715	228.8	-0.2040425	228.8	-0.1917192	228.8	-0.2491228	228.8	-0.2029881	228.8	-0.1924919	228.8	-0.2000352	228.8	-0.1896651	228.8	-0.1559372	228.8	-0.1952689
229	0.8736113	229	0.8391969	229	0.8939268	229	0.927776	229	0.8861774	229	0.9130296	229	0.9380505	229	-0.2098896	229	-0.1879521	229	-0.2477603	229	-0.2031147	229	-0.1893513	229	-0.199252	229	-0.1891328	229	-0.1546439	229	-0.190363
229.2	0.8771114	229.2	0.8442459	229.2	0.8912018	229.2	0.9317493	229.2	0.8861904	229.2	0.9129912	229.2	0.9367053	229.2	-0.2098596	229.2	-0.1837416	229.2	-0.2483454	229.2	-0.2091647	229.2	-0.1887358	229.2	-0.1972892	229.2	-0.1896867	229.2	-0.157647	229.2	-0.1914502
229.4	0.8798676	229.4	0.8476124	229.4	0.8886409	229.4	0.9300176	229.4	0.8866484	229.4	0.916838	229.4	0.9418337	229.4	-0.209728	229.4	-0.1892746	229.4	-0.2483533	229.4	-0.1999567	229.4	-0.1906192	229.4	-0.1981294	229.4	-0.1894773	229.4	-0.1542796	229.4	-0.1947143
229.6	0.8824062	229.6	0.8457923	229.6	0.8938738	229.6	0.9311702	229.6	0.8883245	229.6	0.915949	229.6	0.9381748	229.6	-0.2087397	229.6	-0.1816394	229.6	-0.2488877	229.6	-0.2032255	229.6	-0.1913524	229.6	-0.1990698	229.6	-0.1869357	229.6	-0.1578908	229.6	-0.189377
229.8	0.886531	229.8	0.8449445	229.8	0.89331	229.8	0.9325911	229.8	0.8865572	229.8	0.9156034	229.8	0.9413969	229.8	-0.2092375	229.8	-0.1859381	229.8	-0.2517792	229.8	-0.2016332	229.8	-0.1870459	229.8	-0.1965578	229.8	-0.1862861	229.8	-0.1557276	229.8	-0.1970541
230	0.924048	230	0.8908823	230	0.9408268	230	0.9776697	230	0.9301139	230	0.962805	230	0.9755526	230	-0.2138164	230	-0.1917674	230	-0.246426	230	-0.1993531	230	-0.1884647	230	-0.1982743	230	-0.1875606	230	-0.1535709	230	-0.1929444
230.2	0.9272259	230.2	0.8989814	230.2	0.9411198	230.2	0.977234	230.2	0.93554	230.2	0.9653198	230.2	0.9791836	230.2	-0.2096729	230.2	-0.1808969	230.2	-0.2473575	230.2	-0.2006639	230.2	-0.1919745	230.2	-0.1963881	230.2	-0.1902144	230.2	-0.1526163	230.2	-0.1933858
230.4	0.927337	230.4	0.8913694	230.4	0.9391019	230.4	0.9828622	230.4	0.9417697	230.4	0.9603224	230.4	0.9812706	230.4	-0.2170606	230.4	-0.1813894	230.4	-0.2501144	230.4	-0.2027676	230.4	-0.1865479	230.4	-0.194476	230.4	-0.1899101	230.4	-0.1527621	230.4	-0.1942762
230.6	0.9276538	230.6	0.8932888	230.6	0.9418185	230.6	0.981326	230.6	0.9385203	230.6	0.9658518	230.6	0.9852713	230.6	-0.2123907	230.6	-0.1853299	230.6	-0.2476411	230.6	-0.1995091	230.6	-0.1890786	230.6	-0.1965732	230.6	-0.1859457	230.6	-0.1514784	230.6	-0.1902335
230.8	0.9290779	230.8	0.9034351	230.8	0.9454363	230.8	0.9846359	230.8	0.9397106	230.8	0.9685006	230.8	0.9786558	230.8	-0.2110982	230.8	-0.1808982	230.8	-0.2476891	230.8	-0.1997152	230.8	-0.1878212	230.8	-0.1963028	230.8	-0.1872332	230.8	-0.1533572	230.8	-0.1906528
231	0.9315509	231	0.9013606	231	0.9454501	231	0.9842561	231	0.9435639	231	0.9679519	231	0.9865364	231	-0.2147508	231	-0.1855995	231	-0.2431012	231	-0.1999529	231	-0.185886	231	-0.1937122	231	-0.1857833	231	-0.1526365	231	-0.1923125
231.2	0.9296402	231.2	0.8995312	231.2	0.9441318	231.2	0.9826636	231.2	0.9403106	231.2	0.9681773	231.2	0.9847007	231.2	-0.2099645	231.2	-0.1861196	231.2	-0.2477034	231.2	-0.2009936	231.2	-0.1832844	231.2	-0.1929468	231.2	-0.1871846	231.2	-0.1517097	231.2	-0.1918171
231.4	0.9331541	231.4	0.8978762	231.4	0.9448743	231.4	0.983909	231.4	0.9420086	231.4	0.968576	231.4	0.9869398	231.4	-0.2131868	231.4	-0.1810622	231.4	-0.2444006	231.4	-0.2002337	231.4	-0.1854692	231.4	-0.1935887	231.4	-0.1842012	231.4	-0.1535903	231.4	-0.1889208
231.6	0.9317889	231.6	0.8999813	231.6	0.947681	231.6	0.9883422	231.6	0.9386329	231.6	0.9706385	231.6	0.9877353	231.6	-0.2086789	231.6	-0.1855351	231.6	-0.2458484	231.6	-0.2016451	231.6	-0.1862719	231.6	-0.2008371	231.6	-0.1857695	231.6	-0.1528891	231.6	-0.1934101
231.8	0.939087	231.8	0.896977	231.8	0.9482375	231.8	0.9864562	231.8	0.9476537	231.8	0.9696993	231.8	0.9923424	231.8	-0.2119348	231.8	-0.184937	231.8	-0.249872	231.8	-0.1976278	231.8	-0.184462	231.8	-0.1952367	231.8	-0.1878189	231.8	-0.1545049	231.8	-0.1906186
232	0.9347454	232	0.901459	232	0.9463277	232	0.9868107	232	0.9426866	232	0.9662839	232	0.9890417	232	-0.2081548	232	-0.1849707	232	-0.2447005	232	-0.1937134	232	-0.1857848	232	-0.1955247	232	-0.1860359	232	-0.1525341	232	-0.1957128
232.2	0.9359598	232.2	0.9021476	232.2	0.9516194	232.2	0.9867594	232.2	0.9437566	232.2	0.9747335	232.2	0.9896646	232.2	-0.2058772	232.2	-0.1820063	232.2	-0.2434463	232.2	-0.200051	232.2	-0.1905645	232.2	-0.1923395	232.2	-0.187262	232.2	-0.1520838	232.2	-0.1888432
232.41	0.9365233	232.41	0.9042319	232.41	0.9522582	232.41	0.9862208	232.41	0.9463763	232.41	0.9715271	232.41	0.9905809	232.41	-0.2091146	232.4	-0.1835602	232.4	-0.2439223	232.4	-0.1978486	232.4	-0.182115	232.4	-0.1967623	232.4	-0.1809385	232.4	-0.1517272	232.4	-0.1933164
232.6	0.9377952	232.6	0.9001	232.6	0.9485179	232.6	0.9888241	232.6	0.9431013	232.6	0.9702127	232.6	0.9929751	232.6	-0.208127	232.6	-0.1823838	232.6	-0.2468795	232.6	-0.2013813	232.6	-0.1852572	232.6	-0.1950499	232.6	-0.1862801	232.6	-0.1501686	232.6	-0.1912502
232.8	0.9334657	232.8	0.8991664	232.8	0.9474733	232.8	0.9849581	232.8	0.9382679	232.8	0.969272	232.8	0.9910778	232.8	-0.2103525	232.8	-0.1827699	232.8	-0.2455323	232.8	-0.1992507	232.8	-0.1867435	232.8	-0.1938609	232.8	-0.1853376	232.8	-0.153381	232.8	-0.1905559
233	0.9313656	233	0.9070886	233	0.9525311	233	0.9903449	233	0.9410852	233	0.9655973	233	0.9879031	233	-0.2074077	233	-0.181147	233	-0.2468329	233	-0.1996344	233	-0.182098	233	-0.191437	233	-0.1845812	233	-0.1498787	233	-0.1891409
233.2	0.9376907	233.2	0.9045448	233.2	0.9492439	233.2	0.9877725	233.2	0.9413242	233.2	0.9709191	233.2	0.9870063	233.2	-0.2068591	233.2	-0.1807392	233.2	-0.2406126	233.2	-0.196216	233.2	-0.1885063	233.2	-0.1960955	233.2	-0.1830428	233.2	-0.1516682	233.2	-0.1871606
233.4	0.9382059	233.4	0.9040123	233.4	0.9487885	233.4	0.9863396	233.4	0.9418741	233.4	0.9678316	233.4	0.9881058	233.4	-0.2065811	233.4	-0.1810553	233.4	-0.2481786	233.4	-0.1935453	233.4	-0.1844656	233.4	-0.1939032	233.4	-0.183925	233.4	-0.1520584	233.4	-0.1898909
233.6	0.9424634	233.6	0.9061772	233.6	0.956745	233.6	0.9868325	233.6	0.9440432	233.6	0.9693366	233.6	0.9930649	233.6	-0.2126762	233.6	-0.1826691	233.6	-0.2485171	233.6	-0.1956933	233.6	-0.1841982	233.6	-0.1971056	233.6	-0.18332	233.6	-0.1484685	233.6	-0.1915047
233.8	0.9358042	233.8	0.908524	233.8	0.9487877	233.8	0.9867502	233.8	0.9460201	233.8	0.9726071	233.8	0.9871314	233.8	-0.2033197	233.8	-0.1819182	233.8	-0.2442992	233.8	-0.2020367	233.8	-0.181297	233.8	-0.1907397	233.8	-0.1800422	233.8	-0.151443	233.8	-0.1941637
234	0.9354469	234	0.9057872	234	0.9513437	234	0.9880688	234	0.9455757	234	0.9684324	234	0.9879671	234	-0.2043242	234	-0.1807036	234	-0.2443384	234	-0.1980488	234	-0.1807815	234	-0.1923518	234	-0.1870541	234	-0.148352	234	-0.1882725
234.2	0.9333528	234.2	0.9032805	234.2	0.948745	234.2	0.9851527	234.2	0.9487602	234.2	0.9725661	234.2	0.9932898	234.2	-0.206699	234.2	-0.1792976	234.2	-0.2456786	234.2	-0.1988435	234.2	-0.1829866	234.2	-0.1934899	234.2	-0.1802952	234.2	-0.1487543	234.2	-0.1904903
234.4	0.936599	234.4	0.9089171	234.4	0.951879	234.4	0.9933343	234.4	0.9472994	234.4	0.975585	234.4	0.9901674	234.4	-0.2102549	234.4	-0.1815931	234.4	-0.2437694	234.4	-0.1997962	234.4	-0.186314	234.4	-0.193697	234.4	-0.180397	234.4	-0.1502566	234.4	-0.188016
234.6	0.9350084	234.6	0.9034147	234.6	0.955447	234.6	0.9902804	234.6	0.9460514	234.6	0.9742846	234.6	0.9906648	234.6	-0.2078333	234.6	-0.1828599	234.6	-0.2452069	234.6	-0.1990303	234.6	-0.186185	234.6	-0.1932886	234.6	-0.1860187	234.6	-0.1514256	234.6	-0.1866099
234.8	0.9352397	234.8	0.9045457	234.8	0.9504316	234.8	0.9926755	234.8	0.9472548	234.8	0.9739924	234.8	0.9949866	234.8	-0.2116803	234.8	-0.1818168	234.8	-0.2446499	234.8	-0.1984077	234.8	-0.1862506	234.8	-0.1908055	234.8	-0.186649	234.8	-0.1496037	234.8	-0.1864795
235	0.934702	235	0.9050367	235	0.9515128	235	0.9957671	235	0.9475777	235	0.9745155	235	0.9904937	235	-0.2033362	235	-0.182867	235	-0.2452126	235	-0.1996491	235	-0.1806757	235	-0.1952915	235	-0.1840037	235	-0.1488384	235	-0.191575
235.2	0.934674	235.2	0.9061096	235.2	0.9540308	235.2	0.9945241	235.2	0.9434589	235.2	0.9756047	235.2	0.9946601	235.2	-0.2037691	235.2	-0.1757939	235.2	-0.2413576	235.2	-0.1936684	235.2	-0.1831248	235.2	-0.1933769	235.2	-0.1854632	235.2	-0.1505352	235.2	-0.1855959
235.4	0.9342833	235.4	0.9033983	235.4	0.9480328	235.4	0.9861603	235.4	0.9479917	235.4	0.9707195	235.4	0.9893713	235.4	-0.2054445	235.4	-0.1775814	235.4	-0.242525	235.4	-0.1996326	235.4	-0.1763478	235.4	-0.1923581	235.4	-0.1785542	235.4	-0.1492047	235.4	-0.1837236
235.6	0.9326183	235.6	0.9045277	235.6	0.9554737	235.6	0.9905375	235.6	0.9438601	235.6	0.9708688	235.6	0.991946	235.6	-0.2077396	235.6	-0.1831975	235.6	-0.2390269	235.6	-0.1988148	235.6	-0.1812675	235.6	-0.1919434	235.6	-0.184521	235.6	-0.145729	235.6	-0.1918805
235.8	0.9401408	235.8	0.9044165	235.8	0.9568337	235.8	0.989923	235.8	0.9426648	235.8	0.9744666	235.8	0.9893423	235.8	-0.2060722	235.8	-0.1795303	235.8	-0.239036	235.8	-0.1965095	235.8	-0.1882508	235.8	-0.1974255	235.8	-0.1832686	235.8	-0.1478381	235.8	-0.1924575
236	0.9390771	236	0.9072136	236	0.9535615	236	0.9922742	236	0.9482836	236	0.9708041	236	0.9917977	236	-0.2100711	236	-0.1816966	236	-0.2458045	236	-0.1968625	236	-0.1809814	236	-0.1913195	236	-0.1808484	236	-0.1473312	236	-0.1855927
236.2	0.9325958	236.2	0.9054205	236.2	0.9528911	236.2	0.9932106	236.2	0.9479793	236.2	0.9790488	236.2	0.9915229	236.2	-0.2046018	236.2	-0.1841481	236.2	-0.2410493	236.2	-0.1947768	236.2	-0.1849361	236.2	-0.1952356	236.2	-0.1806227	236.2	-0.1491767	236.2	-0.1892791
236.4	0.9361348	236.4	0.9065344	236.4	0.9571702	236.4	0.9885679	236.4	0.9467774	236.4	0.973046	236.4	0.9919128	236.4	-0.2055482	236.4	-0.1784131	236.4	-0.2470778	236.4	-0.1936989	236.4	-0.184072	236.4	-0.1942704	236.4	-0.1813202	236.4	-0.143137	236.4	-0.1858585
236.6	0.9422894	236.6	0.9045065	236.6	0.9524264	236.6	0.9902651	236.6	0.949881	236.6	0.9756181	236.6	0.9946622	236.6	-0.2044062	236.6	-0.1779345	236.6	-0.2458224	236.6	-0.2000715	236.6	-0.1824908	236.6	-0.1931798	236.6	-0.183534	236.6	-0.1472535	236.6	-0.1883281
236.8	0.9368126	236.8	0.9076633	236.8	0.9488097	236.8	0.9922733	236.8	0.9483992	236.8	0.9731522	236.8	0.9906096	236.8	-0.2024702	236.8	-0.177899	236.8	-0.2413284	236.8	-0.1975368	236.8	-0.1823862	236.8	-0.1901652	236.8	-0.1769096	236.8	-0.1468055	236.8	-0.1900606
237	0.9386211	237	0.9087304	237	0.9534952	237	0.9895632	237	0.9476929	237	0.9773346	237	0.9952191	237	-0.207863	237	-0.1790846	237	-0.2438104	237	-0.1975814	237	-0.184181	237	-0.1966885	237	-0.1818614	237	-0.1481189	237	-0.1922653
237.2	0.9386187	237.2	0.9085718	237.2	0.9516558	237.2	0.994571	237.2	0.9455864	237.2	0.9767581	237.2	0.9951018	237.2	-0.2070401	237.2	-0.1787325	237.2	-0.2426347	237.2	-0.1955383	237.2	-0.1828567	237.2	-0.1902964	237.2	-0.1829305	237.2	-0.1530172	237.2	-0.1901014
237.4	0.9390829	237.4	0.9062626	237.4	0.9567852	237.4	0.9921941	237.4	0.9463736	237.4	0.974806	237.4	0.9903668	237.4	-0.2064237	237.4	-0.1797805	237.4	-0.2443585	237.4	-0.1999801	237.4	-0.1817651	237.4	-0.1912641	237.4	-0.1842778	237.4	-0.152372	237.4	-0.1865809
237.62	0.9430211	237.62	0.9038277	237.62	0.9572859	237.62	0.9938104	237.62	0.9485359	237.62	0.9751607	237.62	0.9938927	237.62	-0.1980179	237.6	-0.1824879	237.6	-0.2380398	237.6	-0.1893219	237.6	-0.1831122	237.6	-0.1914721	237.6	-0.1815815	237.6	-0.1464493	237.6	-0.1868438
237.8	0.9400602	237.8	0.9048742	237.8	0.960569	237.8	0.9929802	237.8	0.9452833	237.8	0.9798192	237.8	0.9970229	237.8	-0.2048726	237.8	-0.1802813	237.8	-0.2385589	237.8	-0.194013	237.8	-0.1817449	237.8	-0.1933955	237.8	-0.1780685	237.8	-0.145049	237.8	-0.1927278
238	0.9385566	238	0.908626	238	0.9573077	238	0.9922906	238	0.949269	238	0.9797729	238	0.9962097	238	-0.2053298	238	-0.1812654	238	-0.2458753	238	-0.1982482	238	-0.1820563	238	-0.1924733	238	-0.1803873	238	-0.1447285	238	-0.1838749
238.2	0.9431418	238.2	0.9115673	238.2	0.9538425	238.2	0.9954861	238.2	0.9489146	238.2	0.9800942	238.2	0.9921116	238.2	-0.203371	238.2	-0.1756843	238.2	-0.2430695	238.2	-0.1996155	238.2	-0.1843043	238.2	-0.1900399	238.2	-0.1774195	238.2	-0.1446423	238.2	-0.1888811
238.4	0.9381399	238.4	0.9054029	238.4	0.9552728	238.4	0.9924759	238.4	0.9564733	238.4	0.9749424	238.4	0.9936917	238.4	-0.2063833	238.4	-0.1830087	238.4	-0.2377471	238.4	-0.1946965	238.4	-0.1817683	238.4	-0.1921141	238.4	-0.1773967	238.4	-0.1438778	238.4	-0.1885976
238.6	0.9385186	238.6	0.9080399	238.6	0.9577486	238.6	0.9916937	238.6	0.9479951	238.6	0.9761193	238.6	0.9946717	238.6	-0.2072621	238.6	-0.1809819	238.6	-0.2423034	238.6	-0.1975079	238.6	-0.1799355	238.6	-0.191712	238.6	-0.1781056	238.6	-0.1502252	238.6	-0.1846691
238.8	0.9381548	238.8	0.9127898	238.8	0.9541286	238.8	0.9933572	238.8	0.9495789	238.8	0.9719211	238.8	0.9907208	238.8	-0.2031355	238.8	-0.1788972	238.8	-0.2437142	238.8	-0.1951134	238.8	-0.1815967	238.8	-0.1899983	238.8	-0.182801	238.8	-0.1448459	238.8	-0.1854097
239	0.9359072	239	0.9084051	239	0.9527408	239	0.9983603	239	0.9492361	239	0.9752424	239	0.9937202	239	-0.2028313	239	-0.1788373	239	-0.24158	239	-0.1985074	239	-0.1791352	239	-0.1899809	239	-0.1836523	239	-0.1436587	239	-0.1862559
239.2	0.9382958	239.2	0.9099441	239.2	0.9611562	239.2	0.9923021	239.2	0.9517032	239.2	0.9738771	239.2	0.9988184	239.2	-0.2026131	239.2	-0.1750407	239.2	-0.2422017	239.2	-0.1960679	239.2	-0.18046	239.2	-0.1899268	239.2	-0.1825325	239.2	-0.1414477	239.2	-0.1884356
239.4	0.9446448	239.4	0.9094948	239.4	0.9600559	239.4	0.9945827	239.4	0.9480783	239.4	0.9767832	239.4	0.9986334	239.4	-0.2024647	239.4	-0.1794319	239.4	-0.2400198	239.4	-0.1984321	239.4	-0.17661	239.4	-0.1899584	239.4	-0.1809146	239.4	-0.1420637	239.4	-0.1890942
239.6	0.9429185	239.6	0.9025381	239.6	0.9578058	239.6	0.99406	239.6	0.9436656	239.6	0.9765352	239.6	0.9991341	239.6	-0.2015717	239.6	-0.1744559	239.6	-0.2431106	239.6	-0.1954592	239.6	-0.1792148	239.6	-0.1900827	239.6	-0.1779166	239.6	-0.1481526	239.6	-0.1886821
239.8	0.9373913	239.8	0.9071342	239.8	0.9528495	239.8	0.9970756	239.8	0.9506482	239.8	0.9750468	239.8	0.9955627	239.8	-0.2043327	239.8	-0.1731799	239.8	-0.2375772	239.8	-0.1927854	239.8	-0.1862335	239.8	-0.1876652	239.8	-0.1771889	239.8	-0.1469985	239.8	-0.1880598
240	0.9466527	240	0.9102506	240	0.9558352	240	0.9969738	240	0.9509837	240	0.9755583	240	0.9955148	240	-0.2011156	240	-0.1754892	240	-0.238044	240	-0.1963202	240	-0.1788173	240	-0.1921466	240	-0.1790679	240	-0.1449566	240	-0.1841986
240.2	0.9405838	240.2	0.9083408	240.2	0.9562691	240.2	0.9970238	240.2	0.9546964	240.2	0.9802443	240.2	0.9950568	240.2	-0.2046968	240.2	-0.1775329	240.2	-0.2408191	240.2	-0.195341	240.2	-0.178622	240.2	-0.1886584	240.2	-0.1803081	240.2	-0.1417547	240.2	-0.1866949
240.4	0.9400163	240.4	0.9087507	240.4	0.9582331	240.4	0.9980392	240.4	0.9499717	240.4	0.9746417	240.4	0.9895456	240.4	-0.2037922	240.4	-0.181276	240.4	-0.2370338	240.4	-0.1904084	240.4	-0.1779323	240.4	-0.1904479	240.4	-0.1811025	240.4	-0.1424883	240.4	-0.1906484
240.6	0.9393039	240.6	0.9068941	240.6	0.9559671	240.6	0.9928503	240.6	0.951656	240.6	0.9808891	240.6	1.003558	240.6	-0.2052571	240.6	-0.1811417	240.6	-0.2431522	240.6	-0.1938824	240.6	-0.178027	240.6	-0.1886178	240.6	-0.176945	240.6	-0.1454177	240.6	-0.1866686
240.8	0.937198	240.8	0.9120098	240.8	0.9596151	240.8	0.9953485	240.8	0.9495218	240.8	0.9764719	240.8	0.9959429	240.8	-0.1989552	240.8	-0.1791084	240.8	-0.2373077	240.8	-0.1953713	240.8	-0.1846604	240.8	-0.1872972	240.8	-0.1776742	240.8	-0.1463562	240.8	-0.1867195
241	0.9414855	241	0.9108751	241	0.954382	241	0.9965988	241	0.948921	241	0.9818877	241	0.9952239	241	-0.2036268	241	-0.1795608	241	-0.2396388	241	-0.1941556	241	-0.1813585	241	-0.1858564	241	-0.1802467	241	-0.1422692	241	-0.1833733
241.2	0.9404122	241.2	0.913489	241.2	0.9569412	241.2	0.9939465	241.2	0.9534019	241.2	0.9815884	241.2	1.000307	241.2	-0.2016985	241.2	-0.1772194	241.2	-0.2406152	241.2	-0.192109	241.2	-0.1796029	241.2	-0.1851641	241.2	-0.1772216	241.2	-0.1433187	241.2	-0.18697
241.4	0.9438298	241.4	0.9054559	241.4	0.9600607	241.4	0.9957481	241.4	0.9507822	241.4	0.9751718	241.4	0.9998955	241.4	-0.2034424	241.4	-0.1788882	241.4	-0.2437391	241.4	-0.1950795	241.4	-0.1760958	241.4	-0.188173	241.4	-0.1778565	241.4	-0.1422886	241.4	-0.1850606
241.6	0.9435204	241.6	0.9130996	241.6	0.9538381	241.6	0.9997236	241.6	0.9520117	241.6	0.9779133	241.6	0.9933273	241.6	-0.2052874	241.6	-0.1765222	241.6	-0.2388116	241.6	-0.1914457	241.6	-0.1717212	241.6	-0.1879554	241.6	-0.1793074	241.6	-0.1446503	241.6	-0.1823177
241.8	0.9390991	241.8	0.908464	241.8	0.9567447	241.8	0.9984743	241.8	0.953079	241.8	0.9812719	241.8	0.9961646	241.8	-0.2032658	241.8	-0.1773748	241.8	-0.2389623	241.8	-0.1933926	241.8	-0.1795095	241.8	-0.1907641	241.8	-0.1816953	241.8	-0.143244	241.8	-0.180792
242	0.9420205	242	0.9099639	242	0.9578529	242	1.000799	242	0.9506181	242	0.978911	242	0.9999198	242	-0.203947	242	-0.1761964	242	-0.2374354	242	-0.1904526	242	-0.1837208	242	-0.1894754	242	-0.1792793	242	-0.1420585	242	-0.187884
242.2	0.9447218	242.2	0.9106064	242.2	0.9564175	242.2	0.9920633	242.2	0.9546586	242.2	0.9825183	242.2	0.9988391	242.2	-0.1986364	242.2	-0.169128	242.2	-0.2438356	242.2	-0.1923268	242.2	-0.1795072	242.2	-0.1891754	242.2	-0.1739305	242.2	-0.1432528	242.2	-0.1857489
242.4	0.9408224	242.4	0.9061029	242.4	0.9579555	242.4	0.9989657	242.4	0.9543961	242.4	0.9811884	242.4	1.001868	242.4	-0.2058984	242.4	-0.176098	242.4	-0.2404622	242.4	-0.1959376	242.4	-0.1796397	242.4	-0.1913613	242.4	-0.1753369	242.4	-0.1485056	242.4	-0.1875655
242.6	0.9419585	242.6	0.9084007	242.6	0.9562582	242.6	0.9933119	242.6	0.9494033	242.6	0.9791311	242.6	0.9976029	242.6	-0.1989484	242.6	-0.1765064	242.6	-0.2371156	242.6	-0.1941336	242.6	-0.1796436	242.6	-0.1881444	242.6	-0.1746695	242.6	-0.1419379	242.6	-0.1818955
242.8	0.9394827	242.8	0.9143925	242.8	0.9572293	242.8	0.9977631	242.8	0.9530146	242.8	0.9787667	242.8	0.998922	242.8	-0.2013757	242.8	-0.1735862	242.8	-0.238428	242.8	-0.1936237	242.8	-0.1769189	242.8	-0.1882137	242.8	-0.1762919	242.8	-0.1413108	242.8	-0.1879269
243	0.9425367	243	0.9114067	243	0.9583791	243	0.9949328	243	0.952045	243	0.9815235	243	0.9985158	243	-0.2024397	243	-0.17621	243	-0.236371	243	-0.1910923	243	-0.1773987	243	-0.1857973	243	-0.1784122	243	-0.1410895	243	-0.1776751
243.2	0.9418461	243.2	0.9127811	243.2	0.9592835	243.2	0.9939173	243.2	0.9538464	243.2	0.9799084	243.2	1.001153	243.2	-0.1990054	243.2	-0.1695946	243.2	-0.2381589	243.2	-0.1890463	243.2	-0.1814918	243.2	-0.1886477	243.2	-0.1808917	243.2	-0.1434303	243.2	-0.1794073
243.4	0.9433501	243.4	0.9150296	243.4	0.9620109	243.4	0.9971949	243.4	0.9546012	243.4	0.9793541	243.4	0.9973954	243.4	-0.2022004	243.4	-0.1782013	243.4	-0.2381452	243.4	-0.1925132	243.4	-0.1793844	243.4	-0.1886356	243.4	-0.1779701	243.4	-0.1441861	243.4	-0.1827584
243.6	0.9438022	243.6	0.908671	243.6	0.9611598	243.6	0.9976196	243.6	0.9488772	243.6	0.9797109	243.6	0.9966235	243.6	-0.2015729	243.6	-0.1771577	243.6	-0.2412487	243.6	-0.1874641	243.6	-0.1773795	243.6	-0.1860236	243.6	-0.1734927	243.6	-0.1443428	243.6	-0.186699
243.8	0.9423311	243.8	0.9091037	243.8	0.961655	243.8	1.002622	243.8	0.9554341	243.8	0.9766721	243.8	0.9964585	243.8	-0.1994039	243.8	-0.1698481	243.8	-0.2373073	243.8	-0.1935676	243.8	-0.176303	243.8	-0.186675	243.8	-0.1825475	243.8	-0.1434062	243.8	-0.183512
244	0.9465845	244	0.9157127	244	0.9615281	244	0.9959668	244	0.9546499	244	0.9788633	244	0.9994481	244	-0.2008806	244	-0.1737733	244	-0.240023	244	-0.1911367	244	-0.1751927	244	-0.1869789	244	-0.1783801	244	-0.1401184	244	-0.1840299
244.2	0.941987	244.2	0.9122691	244.2	0.9609768	244.2	0.9978445	244.2	0.9538466	244.2	0.9841761	244.2	0.9988989	244.2	-0.1997141	244.2	-0.1790476	244.2	-0.2369609	244.2	-0.1910976	244.2	-0.182657	244.2	-0.1866997	244.2	-0.1785105	244.2	-0.1422879	244.2	-0.1841144
244.4	0.9445271	244.4	0.9125491	244.4	0.9604947	244.4	0.9997346	244.4	0.9553438	244.4	0.9799702	244.4	1.006675	244.4	-0.2011661	244.4	-0.1758287	244.4	-0.2335126	244.4	-0.1884929	244.4	-0.1782744	244.4	-0.1858681	244.4	-0.1776304	244.4	-0.1417537	244.4	-0.1850522
244.6	0.9479149	244.6	0.9108866	244.6	0.9617476	244.6	0.9998056	244.6	0.9530473	244.6	0.9814767	244.6	0.9982974	244.6	-0.200809	244.6	-0.1794666	244.6	-0.2397714	244.6	-0.1891963	244.6	-0.1794807	244.6	-0.1866259	244.6	-0.1772126	244.6	-0.1424884	244.6	-0.1839089
244.8	0.9402944	244.8	0.9146375	244.8	0.9621043	244.8	1.001966	244.8	0.9594308	244.8	0.9817635	244.8	1.000702	244.8	-0.2039521	244.8	-0.1731462	244.8	-0.2346773	244.8	-0.188177	244.8	-0.1795058	244.8	-0.1829326	244.8	-0.1720627	244.8	-0.1397654	244.8	-0.1814961
245	0.9455644	245	0.9106024	245	0.9580961	245	0.9953003	245	0.9592389	245	0.9800642	245	0.9982742	245	-0.2014032	245	-0.1705989	245	-0.238204	245	-0.1911287	245	-0.1806534	245	-0.1881215	245	-0.1781624	245	-0.1409485	245	-0.1840428
245.2	0.9410874	245.2	0.909207	245.2	0.9585473	245.2	0.9995142	245.2	0.9529048	245.2	0.9862998	245.2	0.9989297	245.2	-0.2023223	245.2	-0.1744653	245.2	-0.2345111	245.2	-0.195154	245.2	-0.1756301	245.2	-0.1839789	245.2	-0.1738318	245.2	-0.1440924	245.2	-0.1841781
245.4	0.9412531	245.4	0.913806	245.4	0.9627842	245.4	0.9997604	245.4	0.955124	245.4	0.9857841	245.4	0.9986804	245.4	-0.2040012	245.4	-0.1708379	245.4	-0.2415814	245.4	-0.1918297	245.4	-0.1742231	245.4	-0.1870383	245.4	-0.1708807	245.4	-0.1445221	245.4	-0.18333
245.6	0.943145	245.6	0.9087378	245.6	0.9569269	245.6	0.9991052	245.6	0.9549946	245.6	0.984737	245.6	0.9992582	245.6	-0.2016692	245.6	-0.1834086	245.6	-0.2336316	245.6	-0.1904252	245.6	-0.1782579	245.6	-0.1840132	245.6	-0.1738251	245.6	-0.1395721	245.6	-0.1818539
245.8	0.940787	245.8	0.9144572	245.8	0.9626356	245.8	1.000539	245.8	0.9598243	245.8	0.981174	245.8	1.000187	245.8	-0.2048468	245.8	-0.1754931	245.8	-0.2351053	245.8	-0.1856821	245.8	-0.1733704	245.8	-0.1853544	245.8	-0.1765983	245.8	-0.1413943	245.8	-0.1850802
246	0.9445226	246	0.9100391	246	0.9609948	246	1.002113	246	0.9560544	246	0.9822365	246	1.001564	246	-0.2021658	246	-0.1731462	246	-0.2379012	246	-0.1898389	246	-0.1763894	246	-0.1868848	246	-0.1740043	246	-0.1439435	246	-0.1819608
246.2	0.9473742	246.2	0.9156339	246.2	0.9605219	246.2	0.9970827	246.2	0.9561755	246.2	0.9867685	246.2	1.003467	246.2	-0.1999495	246.2	-0.1750627	246.2	-0.2371615	246.2	-0.1831123	246.2	-0.1793576	246.2	-0.1853032	246.2	-0.1740673	246.2	-0.1429493	246.2	-0.1801646
246.4	0.9440379	246.4	0.913088	246.4	0.9631442	246.4	1.001519	246.4	0.9578179	246.4	0.9834275	246.4	1.003733	246.4	-0.1940191	246.4	-0.1792695	246.4	-0.2372155	246.4	-0.1884393	246.4	-0.1755876	246.4	-0.180924	246.4	-0.1726347	246.4	-0.1399814	246.4	-0.1833571
246.6	0.9436606	246.6	0.9115042	246.6	0.9635504	246.6	0.9989	246.6	0.9604926	246.6	0.9832881	246.6	1.005064	246.6	-0.2050245	246.6	-0.1721396	246.6	-0.2343005	246.6	-0.1869642	246.6	-0.1735478	246.6	-0.1857129	246.6	-0.1766457	246.6	-0.1397761	246.6	-0.1769095
246.8	0.9470509	246.8	0.9095365	246.8	0.9615948	246.8	1.001996	246.8	0.9531816	246.8	0.9832217	246.8	1.004828	246.8	-0.1971206	246.8	-0.1710182	246.8	-0.2345216	246.8	-0.1914861	246.8	-0.1757874	246.8	-0.1845011	246.8	-0.1744414	246.8	-0.1398789	246.8	-0.1833195
247	0.9456207	247	0.911476	247	0.960889	247	0.9969047	247	0.9573112	247	0.9847465	247	1.004941	247	-0.2018855	247	-0.1681955	247	-0.2328238	247	-0.186548	247	-0.1721954	247	-0.1832731	247	-0.1786664	247	-0.1398793	247	-0.1834365
247.2	0.9479255	247.2	0.9145403	247.2	0.9644346	247.2	1.003893	247.2	0.9571231	247.2	0.9872072	247.2	1.001419	247.2	-0.2017273	247.2	-0.1715272	247.2	-0.2355552	247.2	-0.1855884	247.2	-0.1735102	247.2	-0.1834465	247.2	-0.1705644	247.2	-0.1372608	247.2	-0.1851716
247.4	0.9483182	247.4	0.9145858	247.4	0.9617541	247.4	1.005454	247.4	0.9550804	247.4	0.9844983	247.4	1.004808	247.4	-0.1978959	247.4	-0.1731105	247.4	-0.2374006	247.4	-0.1888675	247.4	-0.1747506	247.4	-0.1810713	247.4	-0.1733275	247.4	-0.1435897	247.4	-0.1803728
247.6	0.942445	247.6	0.9181594	247.6	0.9596052	247.6	0.9956235	247.6	0.9586992	247.6	0.9857359	247.6	1.00083	247.6	-0.1994613	247.6	-0.1740476	247.6	-0.2329141	247.6	-0.1863692	247.6	-0.1766315	247.6	-0.1776586	247.6	-0.1756027	247.6	-0.1421429	247.6	-0.1787345
247.8	0.9417434	247.8	0.9108323	247.8	0.9644198	247.8	0.9979891	247.8	0.95306	247.8	0.9839087	247.8	1.004209	247.8	-0.2013396	247.8	-0.1720571	247.8	-0.23369	247.8	-0.1858446	247.8	-0.1755044	247.8	-0.1845365	247.8	-0.1755187	247.8	-0.1377814	247.8	-0.1820571
248	0.9459455	248	0.9177358	248	0.9650679	248	1.000957	248	0.9551169	248	0.9844106	248	1.007243	248	-0.2015976	248	-0.1699082	248	-0.2361203	248	-0.1862082	248	-0.1722107	248	-0.1834183	248	-0.1720012	248	-0.1391768	248	-0.1840547
248.2	0.9486476	248.2	0.9143428	248.2	0.9618689	248.2	1.000773	248.2	0.9598473	248.2	0.9852138	248.2	0.9995178	248.2	-0.1999304	248.2	-0.1678313	248.2	-0.2294651	248.2	-0.1858035	248.2	-0.1760837	248.2	-0.1821584	248.2	-0.1704495	248.2	-0.1407195	248.2	-0.1774698
248.4	0.9460126	248.4	0.9127391	248.4	0.9606659	248.4	1.001313	248.4	0.9596949	248.4	0.9852815	248.4	1.003221	248.4	-0.1978652	248.4	-0.1719754	248.4	-0.2360658	248.4	-0.1844407	248.4	-0.1767336	248.4	-0.1860812	248.4	-0.1703152	248.4	-0.1418855	248.4	-0.1834444
248.6	0.9484065	248.6	0.9150033	248.6	0.9665272	248.6	1.002849	248.6	0.9578627	248.6	0.983182	248.6	1.001638	248.6	-0.1962338	248.6	-0.1707784	248.6	-0.2331551	248.6	-0.1892796	248.6	-0.1742429	248.6	-0.1821048	248.6	-0.1758259	248.6	-0.1304957	248.6	-0.1824108
248.8	0.9462408	248.8	0.9155652	248.8	0.9658313	248.8	1.005277	248.8	0.9587203	248.8	0.9845936	248.8	1.006641	248.8	-0.1962775	248.8	-0.1733828	248.8	-0.2354118	248.8	-0.1888987	248.8	-0.1769752	248.8	-0.1828922	248.8	-0.1730781	248.8	-0.1360794	248.8	-0.1812802
249	0.9496577	249	0.918519	249	0.9619862	249	1.003	249	0.9561957	249	0.9827876	249	1.008957	249	-0.2003614	249	-0.1754768	249	-0.232362	249	-0.1898032	249	-0.17486	249	-0.1850379	249	-0.1686413	249	-0.1381986	249	-0.1778468
249.2	0.9471114	249.2	0.9146264	249.2	0.9667229	249.2	1.003623	249.2	0.9579905	249.2	0.9841717	249.2	1.000955	249.2	-0.1967792	249.2	-0.1719823	249.2	-0.2311797	249.2	-0.1847142	249.2	-0.1764219	249.2	-0.1849985	249.2	-0.1704525	249.2	-0.1371481	249.2	-0.1830574
249.4	0.9439495	249.4	0.9158095	249.4	0.9646852	249.4	1.003969	249.4	0.9608461	249.4	0.9878818	249.4	0.9992091	249.4	-0.1999503	249.4	-0.170271	249.4	-0.2303873	249.4	-0.188361	249.4	-0.1742509	249.4	-0.186204	249.4	-0.1675367	249.4	-0.1362001	249.4	-0.1781897
249.6	0.9489343	249.6	0.9131848	249.6	0.9614367	249.6	1.002877	249.6	0.9577236	249.6	0.9881975	249.6	1.001061	249.6	-0.1985114	249.6	-0.1722759	249.6	-0.2310993	249.6	-0.1875082	249.6	-0.1730971	249.6	-0.179253	249.6	-0.1717515	249.6	-0.1368496	249.6	-0.1772139
249.8	0.9475414	249.8	0.9190529	249.8	0.9636237	249.8	1.00302	249.8	0.9614527	249.8	0.9839367	249.8	1.004434	249.8	-0.2025342	249.8	-0.1713978	249.8	-0.235377	249.8	-0.1850489	249.8	-0.1750809	249.8	-0.183976	249.8	-0.1676041	249.8	-0.1399161	249.8	-0.1836082
250	0.944942	250	0.9173955	250	0.9652732	250	1.000583	250	0.958935	250	0.9844659	250	1.007568	250	-0.1982165	250	-0.1713179	250	-0.2339271	250	-0.1839279	250	-0.1776342	250	-0.1778802	250	-0.1704349	250	-0.1360593	250	-0.1831962
250.2	0.9471656	250.2	0.9157478	250.2	0.9648045	250.2	1.000773	250.2	0.9579067	250.2	0.9841419	250.2	1.004635	250.2	-0.1940086	250.2	-0.1668442	250.2	-0.232244	250.2	-0.1865068	250.2	-0.1733198	250.2	-0.1814598	250.2	-0.1733443	250.2	-0.1401283	250.2	-0.1799056
250.4	0.9402445	250.4	0.9183599	250.4	0.964035	250.4	1.00131	250.4	0.9618353	250.4	0.9837669	250.4	1.005538	250.4	-0.1981529	250.4	-0.17081	250.4	-0.2330497	250.4	-0.1875787	250.4	-0.1684976	250.4	-0.1838608	250.4	-0.171047	250.4	-0.1394063	250.4	-0.1843922
250.6	0.9467642	250.6	0.9183939	250.6	0.9676403	250.6	1.002003	250.6	0.9618751	250.6	0.984514	250.6	1.003613	250.6	-0.1967766	250.6	-0.1690813	250.6	-0.2328087	250.6	-0.1873335	250.6	-0.1698565	250.6	-0.183061	250.6	-0.176254	250.6	-0.13578	250.6	-0.1761204
250.8	0.9520893	250.8	0.9096924	250.8	0.9670066	250.8	1.001137	250.8	0.9574917	250.8	0.9829957	250.8	1.00512	250.8	-0.1959288	250.8	-0.171108	250.8	-0.2340807	250.8	-0.185645	250.8	-0.1767202	250.8	-0.1830503	250.8	-0.171639	250.8	-0.1398283	250.8	-0.1786212
251	0.9448932	251	0.9141399	251	0.9656508	251	1.005188	251	0.959806	251	0.9862705	251	1.004801	251	-0.1963105	251	-0.1700898	251	-0.2293628	251	-0.1853521	251	-0.1742225	251	-0.1842159	251	-0.1684391	251	-0.1361263	251	-0.1799839
251.2	0.9493052	251.2	0.9157799	251.2	0.9657001	251.2	1.003748	251.2	0.9581214	251.2	0.9904171	251.2	1.004016	251.2	-0.1975946	251.2	-0.1740925	251.2	-0.2291037	251.2	-0.1860405	251.2	-0.1744902	251.2	-0.1791116	251.2	-0.1691142	251.2	-0.1415242	251.2	-0.1784035
251.4	0.9502809	251.4	0.9189623	251.4	0.9670895	251.4	0.997969	251.4	0.9592111	251.4	0.9849694	251.4	1.005703	251.4	-0.197357	251.4	-0.1687238	251.4	-0.2331444	251.4	-0.1842725	251.4	-0.1729262	251.4	-0.1792647	251.4	-0.1686827	251.4	-0.1352621	251.4	-0.1810332
251.6	0.9527213	251.6	0.9143852	251.6	0.9731237	251.6	1.007111	251.6	0.9578308	251.6	0.9853041	251.6	1.003038	251.6	-0.1930299	251.6	-0.1676361	251.6	-0.2372703	251.6	-0.1833412	251.6	-0.1704952	251.6	-0.1828307	251.6	-0.1668918	251.6	-0.1363596	251.6	-0.1823909
251.8	0.9488339	251.8	0.915576	251.8	0.9639273	251.8	1.006122	251.8	0.96128	251.8	0.9855171	251.8	1.006735	251.8	-0.1989017	251.8	-0.1684056	251.8	-0.2313782	251.8	-0.1822256	251.8	-0.1695099	251.8	-0.1787675	251.8	-0.1692217	251.8	-0.138212	251.8	-0.1814187
252	0.9531534	252	0.9121108	252	0.9629461	252	0.9991898	252	0.9672734	252	0.9855595	252	1.001578	252	-0.1961303	252	-0.166542	252	-0.2314105	252	-0.1831757	252	-0.1704348	252	-0.1790547	252	-0.1737901	252	-0.1335763	252	-0.1806037
252.2	0.9504159	252.2	0.9223109	252.2	0.9686781	252.2	1.003394	252.2	0.9604459	252.2	0.9890005	252.2	1.007081	252.2	-0.199992	252.2	-0.1663684	252.2	-0.2298263	252.2	-0.1907753	252.2	-0.1710817	252.2	-0.178334	252.2	-0.1714047	252.2	-0.1331398	252.2	-0.1807221
252.4	0.9500972	252.4	0.9185481	252.4	0.9658133	252.4	1.006192	252.4	0.9606941	252.4	0.9849045	252.4	1.003469	252.4	-0.1940659	252.4	-0.1703957	252.4	-0.2283334	252.4	-0.1875979	252.4	-0.1696452	252.4	-0.179473	252.4	-0.1723938	252.4	-0.1355955	252.4	-0.179349
252.6	0.9535476	252.6	0.9239585	252.6	0.9656038	252.6	1.006074	252.6	0.9620396	252.6	0.9877327	252.6	1.009415	252.6	-0.1952256	252.6	-0.1724324	252.6	-0.2283881	252.6	-0.1877579	252.6	-0.1694715	252.6	-0.1781181	252.6	-0.1694376	252.6	-0.13634	252.6	-0.1781562
252.8	0.9492433	252.8	0.9222144	252.8	0.972196	252.8	1.007171	252.8	0.9655004	252.8	0.9889964	252.8	1.009112	252.8	-0.1966892	252.8	-0.169101	252.8	-0.2277811	252.8	-0.1839165	252.8	-0.1724927	252.8	-0.1797523	252.8	-0.1692643	252.8	-0.1323191	252.8	-0.1833673
253	0.9507182	253	0.9189121	253	0.9657434	253	1.004464	253	0.9560044	253	0.9891689	253	1.004314	253	-0.1936886	253	-0.1688926	253	-0.232628	253	-0.184264	253	-0.1678111	253	-0.1790584	253	-0.1730659	253	-0.1347791	253	-0.1775604
253.2	0.9496896	253.2	0.9198798	253.2	0.9654818	253.2	1.006413	253.2	0.9615608	253.2	0.9872696	253.2	1.004136	253.2	-0.1959554	253.2	-0.167241	253.2	-0.230148	253.2	-0.1837313	253.2	-0.1724234	253.2	-0.1809205	253.2	-0.1698777	253.2	-0.1349614	253.2	-0.1798902
253.4	0.9478951	253.4	0.9157291	253.4	0.9665137	253.4	0.9997616	253.4	0.9634507	253.4	0.9881485	253.4	1.00181	253.4	-0.1946987	253.4	-0.1703166	253.4	-0.2268311	253.4	-0.1859138	253.4	-0.1722673	253.4	-0.1796564	253.4	-0.1689092	253.4	-0.1357151	253.4	-0.177901
253.6	0.9513919	253.6	0.9204904	253.6	0.9638872	253.6	1.004153	253.6	0.9602689	253.6	0.9846113	253.6	1.005802	253.6	-0.1996356	253.6	-0.1687684	253.6	-0.231134	253.6	-0.1859832	253.6	-0.1716237	253.6	-0.1782437	253.6	-0.1699569	253.6	-0.1373524	253.6	-0.1790614
253.8	0.949646	253.8	0.9181771	253.8	0.9626365	253.8	1.005219	253.8	0.9625894	253.8	0.9868351	253.8	1.007991	253.8	-0.1934498	253.8	-0.1644223	253.8	-0.2268134	253.8	-0.1813819	253.8	-0.1711441	253.8	-0.1821129	253.8	-0.1660363	253.8	-0.1322889	253.8	-0.1775612
254	0.9493464	254	0.9206655	254	0.9656025	254	1.006212	254	0.9603152	254	0.9872116	254	1.002365	254	-0.1967746	254	-0.1703061	254	-0.2308533	254	-0.1820614	254	-0.1704518	254	-0.1773169	254	-0.1697794	254	-0.1383516	254	-0.1839413
254.2	0.9461895	254.2	0.9224539	254.2	0.9674668	254.2	1.006577	254.2	0.9578918	254.2	0.9867918	254.2	1.010868	254.2	-0.1932346	254.2	-0.1669193	254.2	-0.2275004	254.2	-0.1874829	254.2	-0.1677489	254.2	-0.1774154	254.2	-0.1701004	254.2	-0.1339592	254.2	-0.1734839
254.4	0.9476995	254.4	0.919341	254.4	0.9693794	254.4	1.009954	254.4	0.9628232	254.4	0.9914591	254.4	1.010874	254.4	-0.1960566	254.4	-0.1713931	254.4	-0.2297338	254.4	-0.1847253	254.4	-0.1721839	254.4	-0.1790622	254.4	-0.1673035	254.4	-0.1332093	254.4	-0.1803087
254.6	0.9544194	254.6	0.9197756	254.6	0.9675814	254.6	1.007366	254.6	0.9568354	254.6	0.9926162	254.6	1.004281	254.6	-0.1967082	254.6	-0.1702154	254.6	-0.2271258	254.6	-0.1808715	254.6	-0.1735262	254.6	-0.1810172	254.6	-0.1682386	254.6	-0.1362671	254.6	-0.1789262
254.8	0.9489471	254.8	0.9211923	254.8	0.9657772	254.8	1.004035	254.8	0.9657421	254.8	0.9882393	254.8	1.009203	254.8	-0.1921575	254.8	-0.1661069	254.8	-0.2311535	254.8	-0.1810705	254.8	-0.1725034	254.8	-0.1797399	254.8	-0.1712837	254.8	-0.1355629	254.8	-0.1762511
255	0.9539608	255	0.9153634	255	0.9658607	255	1.010515	255	0.9690196	255	0.9859545	255	1.010527	255	-0.1961109	255	-0.1645402	255	-0.2292849	255	-0.1799922	255	-0.171922	255	-0.176465	255	-0.1640624	255	-0.1317913	255	-0.1813696
255.2	0.9503731	255.2	0.9213699	255.2	0.9661452	255.2	1.006666	255.2	0.9613885	255.2	0.9934602	255.2	1.008626	255.2	-0.1949031	255.2	-0.167942	255.2	-0.2310769	255.2	-0.1813286	255.2	-0.1683719	255.2	-0.1791489	255.2	-0.1699795	255.2	-0.1339682	255.2	-0.1730341
255.4	0.94853	255.4	0.9212976	255.4	0.968552	255.4	1.010398	255.4	0.9651508	255.4	0.9881328	255.4	1.012792	255.4	-0.1957114	255.4	-0.1680986	255.4	-0.2308037	255.4	-0.1837169	255.4	-0.1700751	255.4	-0.1819437	255.4	-0.1714481	255.4	-0.1325021	255.4	-0.1764757
255.6	0.951332	255.6	0.9193853	255.6	0.970318	255.6	1.011866	255.6	0.9611464	255.6	0.9915144	255.6	1.010901	255.6	-0.1962492	255.6	-0.1681374	255.6	-0.2300786	255.6	-0.1830977	255.6	-0.1684772	255.6	-0.1792895	255.6	-0.1708616	255.6	-0.1376454	255.6	-0.1760538
255.81	0.954017	255.81	0.9208977	255.81	0.9683002	255.81	1.01104	255.81	0.9645193	255.81	0.989194	255.81	1.006248	255.81	-0.1968895	255.8	-0.1692703	255.8	-0.2263701	255.8	-0.1821168	255.8	-0.1640485	255.8	-0.1777248	255.8	-0.1692462	255.8	-0.1322456	255.8	-0.1764335
256	0.9531977	256	0.9222696	256	0.9691849	256	1.008185	256	0.9652119	256	0.9885105	256	1.009823	256	-0.2026263	256	-0.1653833	256	-0.2284012	256	-0.1820009	256	-0.1684642	256	-0.1767308	256	-0.1637707	256	-0.135494	256	-0.1802269
256.2	0.9506882	256.2	0.9205122	256.2	0.971212	256.2	1.004598	256.2	0.9647025	256.2	0.9877337	256.2	1.005928	256.2	-0.1955448	256.2	-0.1639665	256.2	-0.2258007	256.2	-0.1815788	256.2	-0.1653949	256.2	-0.1768844	256.2	-0.1675514	256.2	-0.1382137	256.2	-0.1783869
256.4	0.9472585	256.4	0.9188959	256.4	0.970651	256.4	1.006726	256.4	0.9648428	256.4	0.9866173	256.4	1.011034	256.4	-0.1942851	256.4	-0.165645	256.4	-0.2310141	256.4	-0.1832078	256.4	-0.1682668	256.4	-0.1767926	256.4	-0.1634938	256.4	-0.1367966	256.4	-0.1811448
256.6	0.9534946	256.6	0.9215968	256.6	0.9706396	256.6	1.007895	256.6	0.9640825	256.6	0.9886292	256.6	1.007031	256.6	-0.195357	256.6	-0.1726961	256.6	-0.2299738	256.6	-0.1788889	256.6	-0.1693706	256.6	-0.1761337	256.6	-0.167183	256.6	-0.1301619	256.6	-0.1804537
256.8	0.9533697	256.8	0.9249847	256.8	0.9657739	256.8	1.009846	256.8	0.9621722	256.8	0.9909232	256.8	1.011443	256.8	-0.1935477	256.8	-0.1654252	256.8	-0.224285	256.8	-0.1823967	256.8	-0.1666263	256.8	-0.1812865	256.8	-0.1704004	256.8	-0.1355635	256.8	-0.1785415
257	0.9557233	257	0.9212718	257	0.9711594	257	1.007167	257	0.9675382	257	0.9912149	257	1.011073	257	-0.1958467	257	-0.1691419	257	-0.2296581	257	-0.1817128	257	-0.1668156	257	-0.1738707	257	-0.1722549	257	-0.1318808	257	-0.1777966
257.2	0.9566139	257.2	0.9216151	257.2	0.9714476	257.2	1.011638	257.2	0.9606929	257.2	0.9879919	257.2	1.004589	257.2	-0.1983888	257.2	-0.1660945	257.2	-0.2255875	257.2	-0.1820767	257.2	-0.1658547	257.2	-0.1757787	257.2	-0.1710858	257.2	-0.1354465	257.2	-0.1780142
257.4	0.9500635	257.4	0.9205862	257.4	0.9680187	257.4	1.010715	257.4	0.9650383	257.4	0.9901003	257.4	1.007024	257.4	-0.1943444	257.4	-0.1646204	257.4	-0.2277056	257.4	-0.1777001	257.4	-0.169124	257.4	-0.1722303	257.4	-0.1658814	257.4	-0.1343196	257.4	-0.1762203
257.6	0.9543771	257.6	0.9203702	257.6	0.9705247	257.6	1.00238	257.6	0.9629746	257.6	0.9913317	257.6	1.012039	257.6	-0.194865	257.6	-0.1659191	257.6	-0.2242959	257.6	-0.1791565	257.6	-0.1657244	257.6	-0.1767029	257.6	-0.1632399	257.6	-0.132842	257.6	-0.1744123
257.8	0.9521921	257.8	0.9232439	257.8	0.9712895	257.8	1.011915	257.8	0.963062	257.8	0.9892947	257.8	1.010704	257.8	-0.1933845	257.8	-0.1664347	257.8	-0.224562	257.8	-0.1801187	257.8	-0.1672722	257.8	-0.181633	257.8	-0.1651438	257.8	-0.1343811	257.8	-0.1809565
258	0.951928	258	0.9222894	258	0.9696347	258	1.00693	258	0.9589694	258	0.9861765	258	1.01064	258	-0.1960258	258	-0.1616093	258	-0.2289685	258	-0.1821568	258	-0.1683185	258	-0.1765897	258	-0.1673731	258	-0.1318033	258	-0.1742291
258.2	0.9533123	258.2	0.9256434	258.2	0.9671686	258.2	1.006544	258.2	0.9652348	258.2	0.9910825	258.2	1.0123	258.2	-0.1947192	258.2	-0.1662911	258.2	-0.2241889	258.2	-0.1814892	258.2	-0.1685325	258.2	-0.1725172	258.2	-0.1655452	258.2	-0.1350116	258.2	-0.1759521
258.4	0.9508311	258.4	0.9228792	258.4	0.9660006	258.4	1.010547	258.4	0.9641684	258.4	0.9937431	258.4	1.007048	258.4	-0.1921103	258.4	-0.1653891	258.4	-0.2250212	258.4	-0.1806966	258.4	-0.168373	258.4	-0.1758092	258.4	-0.1657424	258.4	-0.1343162	258.4	-0.1770625
258.62	0.9499165	258.62	0.9214637	258.62	0.9751114	258.62	1.01042	258.62	0.9628022	258.62	0.9922141	258.62	1.010121	258.62	-0.1946873	258.6	-0.1648216	258.6	-0.2271816	258.6	-0.1827034	258.6	-0.1684206	258.6	-0.1760306	258.6	-0.1652131	258.6	-0.1318662	258.6	-0.172966
258.8	0.9516414	258.8	0.9245933	258.8	0.9714307	258.8	1.011351	258.8	0.9695401	258.8	0.9890283	258.8	1.006166	258.8	-0.1942742	258.8	-0.1655307	258.8	-0.2276729	258.8	-0.1798459	258.8	-0.1664774	258.8	-0.1739202	258.8	-0.164957	258.8	-0.131395	258.8	-0.1773646
259	0.9568864	259	0.9219649	259	0.9670348	259	1.010327	259	0.9651958	259	0.9964353	259	1.012465	259	-0.1912626	259	-0.1656653	259	-0.229279	259	-0.1797556	259	-0.1670865	259	-0.1763069	259	-0.1656897	259	-0.1360622	259	-0.175691
259.2	0.9493657	259.2	0.921485	259.2	0.9667124	259.2	1.009843	259.2	0.9656257	259.2	0.9886293	259.2	1.007228	259.2	-0.1924172	259.2	-0.1663626	259.2	-0.2309392	259.2	-0.1781343	259.2	-0.1674582	259.2	-0.1707861	259.2	-0.1664098	259.2	-0.1304713	259.2	-0.1780301
259.4	0.9547659	259.4	0.9234884	259.4	0.9717435	259.4	1.011895	259.4	0.9627509	259.4	0.9932026	259.4	1.013484	259.4	-0.1929208	259.4	-0.1661288	259.4	-0.2276793	259.4	-0.1798925	259.4	-0.163123	259.4	-0.1734086	259.4	-0.1661398	259.4	-0.1281249	259.4	-0.1752912
259.6	0.9522191	259.6	0.9200806	259.6	0.9674844	259.6	1.014372	259.6	0.9671748	259.6	0.9933215	259.6	1.011533	259.6	-0.1902796	259.6	-0.1626554	259.6	-0.2252764	259.6	-0.1798406	259.6	-0.1666915	259.6	-0.1730669	259.6	-0.1638771	259.6	-0.1326634	259.6	-0.172696
259.8	0.9551768	259.8	0.9190662	259.8	0.9750074	259.8	1.006813	259.8	0.9629756	259.8	0.9928466	259.8	1.014537	259.8	-0.1939581	259.8	-0.1654576	259.8	-0.2255377	259.8	-0.1788644	259.8	-0.1676901	259.8	-0.1788984	259.8	-0.1638414	259.8	-0.1349937	259.8	-0.1752553
260	0.9508002	260	0.9226121	260	0.97119	260	1.010396	260	0.9651846	260	0.9918779	260	1.013509	260	-0.1954539	260	-0.1591751	260	-0.2271813	260	-0.1779671	260	-0.1612452	260	-0.1739518	260	-0.1666787	260	-0.1261565	260	-0.1755871
260.2	0.9553782	260.2	0.9234416	260.2	0.9736842	260.2	1.010179	260.2	0.9677396	260.2	0.9938933	260.2	1.0079	260.2	-0.1886936	260.2	-0.163242	260.2	-0.2265163	260.2	-0.1789285	260.2	-0.1645937	260.2	-0.1750343	260.2	-0.1650756	260.2	-0.1312537	260.2	-0.177534
260.4	0.9563649	260.4	0.9234039	260.4	0.971944	260.4	1.009359	260.4	0.9625123	260.4	0.9918106	260.4	1.009022	260.4	-0.1929479	260.4	-0.1668598	260.4	-0.2266795	260.4	-0.1760661	260.4	-0.1684043	260.4	-0.1701785	260.4	-0.162656	260.4	-0.1270377	260.4	-0.1720099
260.6	0.9573115	260.6	0.9217643	260.6	0.9743665	260.6	1.008441	260.6	0.9680458	260.6	0.9926312	260.6	1.013415	260.6	-0.192698	260.6	-0.165038	260.6	-0.2262861	260.6	-0.1798561	260.6	-0.1675287	260.6	-0.1726281	260.6	-0.1652097	260.6	-0.13134	260.6	-0.1733781
260.8	0.9511378	260.8	0.9257088	260.8	0.9696359	260.8	1.011463	260.8	0.9654155	260.8	0.9914933	260.8	1.011222	260.8	-0.1954062	260.8	-0.1631073	260.8	-0.227687	260.8	-0.1789031	260.8	-0.1610488	260.8	-0.1704928	260.8	-0.1676454	260.8	-0.1311619	260.8	-0.1734802
261	0.9538227	261	0.9184717	261	0.9701496	261	1.009624	261	0.9643043	261	0.9906301	261	1.012897	261	-0.1920952	261	-0.1616834	261	-0.2299957	261	-0.179003	261	-0.1675404	261	-0.1777864	261	-0.1597876	261	-0.1290988	261	-0.1779007
261.2	0.9523602	261.2	0.922888	261.2	0.974316	261.2	1.008859	261.2	0.9625341	261.2	0.9897029	261.2	1.015395	261.2	-0.1947869	261.2	-0.1620748	261.2	-0.2241569	261.2	-0.1766363	261.2	-0.1670263	261.2	-0.1715982	261.2	-0.1642057	261.2	-0.1316109	261.2	-0.1754413
261.4	0.9525169	261.4	0.9272378	261.4	0.9716554	261.4	1.004596	261.4	0.964733	261.4	0.9924517	261.4	1.012655	261.4	-0.193322	261.4	-0.1635628	261.4	-0.2288765	261.4	-0.1792552	261.4	-0.1643666	261.4	-0.1739482	261.4	-0.1667766	261.4	-0.1261549	261.4	-0.1743371
261.6	0.9584155	261.6	0.9228578	261.6	0.9727857	261.6	1.010593	261.6	0.9665464	261.6	0.9918174	261.6	1.010691	261.6	-0.1960301	261.6	-0.1628981	261.6	-0.2221014	261.6	-0.178835	261.6	-0.1661051	261.6	-0.1699547	261.6	-0.1626539	261.6	-0.1303289	261.6	-0.1768227
261.8	0.955846	261.8	0.9208877	261.8	0.9775631	261.8	1.009097	261.8	0.9643106	261.8	0.9953536	261.8	1.012408	261.8	-0.1922843	261.8	-0.1648248	261.8	-0.2239487	261.8	-0.1778051	261.8	-0.1657416	261.8	-0.1712069	261.8	-0.1640163	261.8	-0.1297994	261.8	-0.1755426
262	0.9564157	262	0.9251236	262	0.9726239	262	1.012401	262	0.9633542	262	0.9967548	262	1.010449	262	-0.193566	262	-0.1653362	262	-0.2265766	262	-0.1765255	262	-0.1646093	262	-0.1748756	262	-0.1625705	262	-0.1291964	262	-0.17522
262.2	0.9580382	262.2	0.9181117	262.2	0.9740714	262.2	1.012634	262.2	0.9678211	262.2	0.994524	262.2	1.016486	262.2	-0.1904889	262.2	-0.1585375	262.2	-0.2297284	262.2	-0.1808097	262.2	-0.1642357	262.2	-0.1746067	262.2	-0.1651536	262.2	-0.1309803	262.2	-0.1742167
262.4	0.9568514	262.4	0.9245159	262.4	0.9717325	262.4	1.011209	262.4	0.9692234	262.4	0.9963086	262.4	1.01646	262.4	-0.1931852	262.4	-0.1641471	262.4	-0.2217578	262.4	-0.1785909	262.4	-0.1673547	262.4	-0.1719171	262.4	-0.1653545	262.4	-0.1307469	262.4	-0.1718946
262.6	0.9540125	262.6	0.9264776	262.6	0.9718074	262.6	1.010997	262.6	0.9650281	262.6	0.99439	262.6	1.013445	262.6	-0.1932677	262.6	-0.1608626	262.6	-0.2244698	262.6	-0.1777708	262.6	-0.160389	262.6	-0.1707062	262.6	-0.1599441	262.6	-0.1320523	262.6	-0.173794
262.8	0.9542356	262.8	0.9211426	262.8	0.969097	262.8	1.007132	262.8	0.9656716	262.8	0.9950475	262.8	1.012674	262.8	-0.1939421	262.8	-0.162609	262.8	-0.2254959	262.8	-0.1741633	262.8	-0.1626042	262.8	-0.1733827	262.8	-0.1619138	262.8	-0.1288438	262.8	-0.1728458
263	0.9547673	263	0.9273399	263	0.9765725	263	1.008467	263	0.971649	263	0.9926324	263	1.013398	263	-0.1889068	263	-0.1582918	263	-0.22301	263	-0.1772051	263	-0.1635501	263	-0.1716684	263	-0.1632722	263	-0.1298583	263	-0.1742162
263.2	0.9601212	263.2	0.9233404	263.2	0.9729854	263.2	1.009126	263.2	0.970292	263.2	0.992873	263.2	1.015114	263.2	-0.1895816	263.2	-0.1605946	263.2	-0.2211788	263.2	-0.1777063	263.2	-0.1667315	263.2	-0.1704306	263.2	-0.1635048	263.2	-0.1278693	263.2	-0.1716613
263.4	0.9511579	263.4	0.9196932	263.4	0.9754488	263.4	1.010122	263.4	0.9658096	263.4	0.9926133	263.4	1.010755	263.4	-0.1927279	263.4	-0.1589536	263.4	-0.2288692	263.4	-0.1750113	263.4	-0.1635196	263.4	-0.1717393	263.4	-0.1619838	263.4	-0.12667	263.4	-0.1722627
263.61	0.9572167	263.61	0.9244395	263.61	0.9758271	263.61	1.012614	263.61	0.962887	263.61	0.9981684	263.61	1.019114	263.61	-0.1905974	263.6	-0.1575887	263.6	-0.2219107	263.6	-0.1768014	263.6	-0.165542	263.6	-0.1733218	263.6	-0.1634822	263.6	-0.1312677	263.6	-0.1719158
263.8	0.956315	263.8	0.9241292	263.8	0.9767705	263.8	1.010051	263.8	0.9689537	263.8	0.9975035	263.8	1.013198	263.8	-0.1908231	263.8	-0.1618802	263.8	-0.2248067	263.8	-0.1727244	263.8	-0.1647883	263.8	-0.1746234	263.8	-0.1603047	263.8	-0.1282346	263.8	-0.174251
264	0.9587532	264	0.9229004	264	0.9754132	264	1.012502	264	0.9662125	264	0.9928941	264	1.015342	264	-0.1916942	264	-0.1657409	264	-0.2220524	264	-0.1773839	264	-0.1642834	264	-0.167402	264	-0.1648434	264	-0.1305955	264	-0.1744131
264.2	0.9565849	264.2	0.9270299	264.2	0.9746303	264.2	1.007658	264.2	0.9689466	264.2	0.9959556	264.2	1.014492	264.2	-0.1936811	264.2	-0.1617785	264.2	-0.2219876	264.2	-0.175076	264.2	-0.16515	264.2	-0.1739324	264.2	-0.1608959	264.2	-0.1271717	264.2	-0.1734418
264.4	0.957316	264.4	0.92836	264.4	0.9789773	264.4	1.008993	264.4	0.9661015	264.4	0.9981207	264.4	1.014606	264.4	-0.1884716	264.4	-0.1647677	264.4	-0.2221486	264.4	-0.1765489	264.4	-0.1666535	264.4	-0.1721095	264.4	-0.1584446	264.4	-0.1273751	264.4	-0.1736869
264.6	0.9563846	264.6	0.9206858	264.6	0.9695891	264.6	1.012295	264.6	0.9679683	264.6	0.9965962	264.6	1.015797	264.6	-0.1881654	264.6	-0.1592875	264.6	-0.225493	264.6	-0.1727386	264.6	-0.1619132	264.6	-0.1726548	264.6	-0.1614776	264.6	-0.1350542	264.6	-0.1728245
264.8	0.9583084	264.8	0.9248272	264.8	0.9739299	264.8	1.008327	264.8	0.9666943	264.8	0.9947565	264.8	1.011847	264.8	-0.1931044	264.8	-0.1587856	264.8	-0.2255512	264.8	-0.1777206	264.8	-0.1612301	264.8	-0.170522	264.8	-0.1595459	264.8	-0.1303858	264.8	-0.1723714
265	0.9545556	265	0.9247373	265	0.9749781	265	1.009513	265	0.9705271	265	0.9962432	265	1.01624	265	-0.1896796	265	-0.1650252	265	-0.2239882	265	-0.1784049	265	-0.1636963	265	-0.1721475	265	-0.1649821	265	-0.1275326	265	-0.1752716
265.21	0.9605768	265.21	0.9237127	265.21	0.97438	265.21	1.015213	265.21	0.9691832	265.21	0.993396	265.21	1.012342	265.21	-0.1883603	265.2	-0.1601336	265.2	-0.2260221	265.2	-0.173233	265.2	-0.1644146	265.2	-0.1721864	265.2	-0.1597928	265.2	-0.1287863	265.2	-0.1664764
265.41	0.9569363	265.41	0.9262084	265.41	0.9763393	265.41	1.013281	265.41	0.9655904	265.41	0.9967767	265.41	1.014807	265.41	-0.1902822	265.4	-0.1615907	265.4	-0.2189794	265.4	-0.1773978	265.4	-0.1615833	265.4	-0.174115	265.4	-0.1619236	265.4	-0.1299428	265.4	-0.1704353
265.6	0.9561049	265.6	0.9269727	265.6	0.9745825	265.6	1.008802	265.6	0.9691208	265.6	0.9995888	265.6	1.012701	265.6	-0.1893583	265.6	-0.1573688	265.6	-0.2271461	265.6	-0.1774852	265.6	-0.1628	265.6	-0.1691664	265.6	-0.1590051	265.6	-0.1251401	265.6	-0.1730116
265.8	0.9551408	265.8	0.9292679	265.8	0.975253	265.8	1.010916	265.8	0.9718184	265.8	0.9964816	265.8	1.01456	265.8	-0.188073	265.8	-0.1572109	265.8	-0.2178779	265.8	-0.1810607	265.8	-0.1610746	265.8	-0.1732181	265.8	-0.1616646	265.8	-0.1270053	265.8	-0.1710778
266	0.958781	266	0.926239	266	0.9812991	266	1.011843	266	0.9698159	266	0.998421	266	1.01329	266	-0.19215	266	-0.1597808	266	-0.2224683	266	-0.1785574	266	-0.160508	266	-0.1724396	266	-0.1637924	266	-0.1254532	266	-0.1709931
266.2	0.9569013	266.2	0.9255258	266.2	0.978297	266.2	1.014572	266.2	0.9679176	266.2	0.9908816	266.2	1.010586	266.2	-0.1890307	266.2	-0.1646205	266.2	-0.2203993	266.2	-0.1779993	266.2	-0.1666453	266.2	-0.1699122	266.2	-0.1647769	266.2	-0.1315564	266.2	-0.1711163
266.4	0.9547127	266.4	0.9291218	266.4	0.9746007	266.4	1.011709	266.4	0.9676573	266.4	0.9959332	266.4	1.013451	266.4	-0.1927382	266.4	-0.1602415	266.4	-0.2254359	266.4	-0.1733914	266.4	-0.1595432	266.4	-0.1656885	266.4	-0.1625186	266.4	-0.1265924	266.4	-0.1737114
266.6	0.9553148	266.6	0.9248277	266.6	0.9796157	266.6	1.009389	266.6	0.9703199	266.6	0.9965311	266.6	1.015334	266.6	-0.1879247	266.6	-0.1560347	266.6	-0.2183396	266.6	-0.1774258	266.6	-0.1581141	266.6	-0.1681393	266.6	-0.1616702	266.6	-0.1287103	266.6	-0.1717742
266.8	0.9553545	266.8	0.9246982	266.8	0.9748658	266.8	1.011802	266.8	0.9694617	266.8	0.9950716	266.8	1.015624	266.8	-0.1904999	266.8	-0.1576215	266.8	-0.2221218	266.8	-0.1723026	266.8	-0.1573789	266.8	-0.1718511	266.8	-0.1591519	266.8	-0.1293835	266.8	-0.172006
267	0.9596713	267	0.9221637	267	0.9763941	267	1.013295	267	0.9684439	267	0.996334	267	1.014756	267	-0.1903078	267	-0.1617419	267	-0.2197902	267	-0.1742565	267	-0.1591566	267	-0.168495	267	-0.1598492	267	-0.1268374	267	-0.1733151
267.2	0.9585152	267.2	0.929222	267.2	0.9731528	267.2	1.013168	267.2	0.9657431	267.2	0.9978518	267.2	1.017698	267.2	-0.1904657	267.2	-0.1571115	267.2	-0.2192765	267.2	-0.17631	267.2	-0.1606907	267.2	-0.1708515	267.2	-0.1605124	267.2	-0.131467	267.2	-0.1645592
267.4	0.9599081	267.4	0.9278476	267.4	0.9787334	267.4	1.011538	267.4	0.974332	267.4	0.9947255	267.4	1.021255	267.4	-0.1933043	267.4	-0.1591114	267.4	-0.2195403	267.4	-0.174551	267.4	-0.1637282	267.4	-0.1712427	267.4	-0.1568883	267.4	-0.1301233	267.4	-0.1735607
267.6	0.962885	267.6	0.9241947	267.6	0.979268	267.6	1.011797	267.6	0.9681596	267.6	0.9985909	267.6	1.01394	267.6	-0.1901257	267.6	-0.1586509	267.6	-0.2201297	267.6	-0.1701939	267.6	-0.1670729	267.6	-0.1691709	267.6	-0.16091	267.6	-0.1267189	267.6	-0.1748867
267.8	0.9565011	267.8	0.9279963	267.8	0.9773133	267.8	1.014562	267.8	0.9759164	267.8	1.000873	267.8	1.01713	267.8	-0.1896991	267.8	-0.1585622	267.8	-0.2197088	267.8	-0.1725008	267.8	-0.160804	267.8	-0.1694916	267.8	-0.1587005	267.8	-0.1238476	267.8	-0.170149
268	0.9614949	268	0.9255304	268	0.9781197	268	1.011539	268	0.9675204	268	0.9989808	268	1.013654	268	-0.1902017	268	-0.160475	268	-0.2235249	268	-0.1675689	268	-0.1626281	268	-0.1709849	268	-0.157966	268	-0.1327365	268	-0.170328
268.2	0.9582547	268.2	0.9266115	268.2	0.9765897	268.2	1.012027	268.2	0.9697995	268.2	0.9943649	268.2	1.019414	268.2	-0.1893067	268.2	-0.1598437	268.2	-0.2207934	268.2	-0.1723006	268.2	-0.1675867	268.2	-0.1673315	268.2	-0.1568743	268.2	-0.1298202	268.2	-0.1712369
268.4	0.9600297	268.4	0.9261288	268.4	0.9808859	268.4	1.015544	268.4	0.9779952	268.4	0.9982162	268.4	1.019579	268.4	-0.1848311	268.4	-0.1593961	268.4	-0.2257074	268.4	-0.1736481	268.4	-0.1607907	268.4	-0.1725117	268.4	-0.154805	268.4	-0.1273833	268.4	-0.1680204
268.6	0.9624046	268.6	0.932451	268.6	0.976852	268.6	1.015965	268.6	0.9712898	268.6	0.9965489	268.6	1.017464	268.6	-0.187814	268.6	-0.1594208	268.6	-0.2239857	268.6	-0.1730703	268.6	-0.1616916	268.6	-0.1684497	268.6	-0.1576636	268.6	-0.1249694	268.6	-0.1718929
268.8	0.958988	268.8	0.9238567	268.8	0.9729246	268.8	1.0173	268.8	0.9657557	268.8	0.9923923	268.8	1.016452	268.8	-0.1898168	268.8	-0.1516857	268.8	-0.2218834	268.8	-0.170407	268.8	-0.163702	268.8	-0.1768925	268.8	-0.1614382	268.8	-0.124384	268.8	-0.1695417
269	0.9565096	269	0.9328021	269	0.9768694	269	1.01282	269	0.9748557	269	0.9964819	269	1.015555	269	-0.1870142	269	-0.1560379	269	-0.2178224	269	-0.1753831	269	-0.1591378	269	-0.1682885	269	-0.1619939	269	-0.127668	269	-0.1708938
269.2	0.9539531	269.2	0.9240637	269.2	0.9778107	269.2	1.016082	269.2	0.9714227	269.2	0.9946267	269.2	1.015735	269.2	-0.1918033	269.2	-0.1573212	269.2	-0.2180455	269.2	-0.1760394	269.2	-0.1616236	269.2	-0.1682777	269.2	-0.160784	269.2	-0.1233384	269.2	-0.1732549
269.4	0.9575552	269.4	0.9266061	269.4	0.9756864	269.4	1.016039	269.4	0.9656047	269.4	0.9981265	269.4	1.013667	269.4	-0.1899815	269.4	-0.1549725	269.4	-0.2231781	269.4	-0.1695639	269.4	-0.1593187	269.4	-0.1689074	269.4	-0.1613449	269.4	-0.1238984	269.4	-0.1710511
269.6	0.9624877	269.6	0.9277087	269.6	0.9784778	269.6	1.014287	269.6	0.9733793	269.6	0.9953315	269.6	1.016163	269.6	-0.1863182	269.6	-0.1581544	269.6	-0.2200815	269.6	-0.1724794	269.6	-0.1567728	269.6	-0.167405	269.6	-0.1612279	269.6	-0.1272742	269.6	-0.1670757
269.8	0.9611234	269.8	0.9265776	269.8	0.9778992	269.8	1.014014	269.8	0.9699138	269.8	1.001734	269.8	1.021006	269.8	-0.1888166	269.8	-0.1547401	269.8	-0.216731	269.8	-0.1746078	269.8	-0.1598714	269.8	-0.1656349	269.8	-0.1611696	269.8	-0.1215528	269.8	-0.1695587
270	0.9606503	270	0.926337	270	0.974552	270	1.0148	270	0.9713544	270	0.9951541	270	1.015834	270	-0.1899214	270	-0.1583384	270	-0.2207969	270	-0.173698	270	-0.1604257	270	-0.1713837	270	-0.1542147	270	-0.1197264	270	-0.1678114
270.2	0.959087	270.2	0.9243084	270.2	0.9758279	270.2	1.014276	270.2	0.9703547	270.2	0.9991928	270.2	1.014732	270.2	-0.192137	270.2	-0.1585041	270.2	-0.2126914	270.2	-0.1730673	270.2	-0.1576676	270.2	-0.1695473	270.2	-0.1576967	270.2	-0.1250568	270.2	-0.1733771
270.4	0.9596819	270.4	0.9255686	270.4	0.9773346	270.4	1.020049	270.4	0.9772934	270.4	0.9971108	270.4	1.017832	270.4	-0.1889617	270.4	-0.1560079	270.4	-0.2218427	270.4	-0.175268	270.4	-0.1596396	270.4	-0.1655612	270.4	-0.1539096	270.4	-0.1263559	270.4	-0.1712055
270.6	0.9610822	270.6	0.9304504	270.6	0.9780519	270.6	1.016443	270.6	0.9695045	270.6	0.9982471	270.6	1.01804	270.6	-0.1889023	270.6	-0.1571285	270.6	-0.2216208	270.6	-0.1701761	270.6	-0.1577371	270.6	-0.1654118	270.6	-0.1577613	270.6	-0.1171011	270.6	-0.1724292
270.8	0.9573548	270.8	0.9312672	270.8	0.978027	270.8	1.014501	270.8	0.9662075	270.8	0.9985166	270.8	1.020014	270.8	-0.1890318	270.8	-0.158307	270.8	-0.218084	270.8	-0.1713885	270.8	-0.1615847	270.8	-0.1701114	270.8	-0.1621058	270.8	-0.1266135	270.8	-0.1664844
271	0.9574903	271	0.9302126	271	0.9820028	271	1.009175	271	0.9736556	271	0.9959188	271	1.012513	271	-0.1880069	271	-0.1540539	271	-0.2169084	271	-0.1691035	271	-0.159338	271	-0.1666723	271	-0.1603412	271	-0.1247197	271	-0.171431
271.2	0.9599152	271.2	0.9301355	271.2	0.9793975	271.2	1.015467	271.2	0.9703241	271.2	0.9967328	271.2	1.020324	271.2	-0.188341	271.2	-0.1561411	271.2	-0.2154703	271.2	-0.1717299	271.2	-0.1599516	271.2	-0.1680538	271.2	-0.1593432	271.2	-0.1261158	271.2	-0.1679568
271.4	0.9625997	271.4	0.9323828	271.4	0.9801124	271.4	1.014101	271.4	0.9746592	271.4	0.9974682	271.4	1.014361	271.4	-0.1879185	271.4	-0.1593274	271.4	-0.2190652	271.4	-0.1771151	271.4	-0.1613829	271.4	-0.1646627	271.4	-0.1599289	271.4	-0.1258806	271.4	-0.1646728
271.6	0.959601	271.6	0.9262283	271.6	0.9811013	271.6	1.007923	271.6	0.9747015	271.6	1.000923	271.6	1.014575	271.6	-0.189638	271.6	-0.1522643	271.6	-0.2202777	271.6	-0.1724117	271.6	-0.1573265	271.6	-0.1602468	271.6	-0.1545418	271.6	-0.1274377	271.6	-0.1715801
271.8	0.9655818	271.8	0.9314483	271.8	0.9780363	271.8	1.015236	271.8	0.9739348	271.8	1.000109	271.8	1.012027	271.8	-0.1878066	271.8	-0.1557426	271.8	-0.2180996	271.8	-0.1711822	271.8	-0.1560773	271.8	-0.1679785	271.8	-0.1584481	271.8	-0.1279365	271.8	-0.1720081
272	0.9610684	272	0.9272195	272	0.9821524	272	1.013023	272	0.9765606	272	0.9966755	272	1.021757	272	-0.1831478	272	-0.1557531	272	-0.2153448	272	-0.1710852	272	-0.1575361	272	-0.1691222	272	-0.1608992	272	-0.1226254	272	-0.1676429
272.2	0.9622948	272.2	0.9241797	272.2	0.9840533	272.2	1.012149	272.2	0.9753518	272.2	0.9973713	272.2	1.015978	272.2	-0.1806072	272.2	-0.154718	272.2	-0.2153025	272.2	-0.1677411	272.2	-0.155333	272.2	-0.1683715	272.2	-0.1565991	272.2	-0.1237233	272.2	-0.1693074
272.4	0.9629436	272.4	0.9326317	272.4	0.9842903	272.4	1.017152	272.4	0.9675884	272.4	1.005665	272.4	1.01943	272.4	-0.1887356	272.4	-0.1545534	272.4	-0.2167419	272.4	-0.17181	272.4	-0.162214	272.4	-0.1678343	272.4	-0.158039	272.4	-0.123148	272.4	-0.170964
272.6	0.9605848	272.6	0.930684	272.6	0.9801013	272.6	1.016692	272.6	0.9739801	272.6	0.9939043	272.6	1.014388	272.6	-0.184792	272.6	-0.1567615	272.6	-0.2158403	272.6	-0.1677549	272.6	-0.1539946	272.6	-0.1684646	272.6	-0.1586098	272.6	-0.1307461	272.6	-0.1689802
272.8	0.9587946	272.8	0.9287162	272.8	0.978549	272.8	1.018286	272.8	0.9721377	272.8	0.9957614	272.8	1.015157	272.8	-0.183811	272.8	-0.1598332	272.8	-0.2176137	272.8	-0.1710569	272.8	-0.1561199	272.8	-0.1675811	272.8	-0.1543611	272.8	-0.1261904	272.8	-0.1722944
273	0.9584406	273	0.9277799	273	0.9819311	273	1.017744	273	0.9721112	273	1.000035	273	1.021084	273	-0.189804	273	-0.1550158	273	-0.2151528	273	-0.1698395	273	-0.1577598	273	-0.1674079	273	-0.1566074	273	-0.121188	273	-0.1725985
273.2	0.959186	273.2	0.9310499	273.2	0.9785785	273.2	1.017284	273.2	0.9717872	273.2	1.003702	273.2	1.018077	273.2	-0.1874809	273.2	-0.1568907	273.2	-0.2170663	273.2	-0.1716679	273.2	-0.1566602	273.2	-0.1633909	273.2	-0.1562005	273.2	-0.1220208	273.2	-0.1708664
273.4	0.9683473	273.4	0.928432	273.4	0.9800877	273.4	1.020117	273.4	0.9738049	273.4	0.9976243	273.4	1.021058	273.4	-0.1875906	273.4	-0.151317	273.4	-0.2233167	273.4	-0.1692231	273.4	-0.1629674	273.4	-0.1649232	273.4	-0.1570175	273.4	-0.123826	273.4	-0.1690492
273.6	0.961973	273.6	0.9316398	273.6	0.9809588	273.6	1.017822	273.6	0.9718913	273.6	1.000951	273.6	1.023832	273.6	-0.1876008	273.6	-0.1603865	273.6	-0.2169005	273.6	-0.1678362	273.6	-0.1546559	273.6	-0.1646784	273.6	-0.1513338	273.6	-0.124964	273.6	-0.1716396
273.8	0.960717	273.8	0.9271574	273.8	0.9831787	273.8	1.017658	273.8	0.9730507	273.8	0.995332	273.8	1.018858	273.8	-0.1868243	273.8	-0.1553722	273.8	-0.2159072	273.8	-0.173789	273.8	-0.1578964	273.8	-0.16285	273.8	-0.1593137	273.8	-0.1180526	273.8	-0.1688057
274	0.9591846	274	0.928027	274	0.9793882	274	1.016957	274	0.9728413	274	1.003821	274	1.016907	274	-0.183872	274	-0.1570101	274	-0.2163622	274	-0.1718215	274	-0.1586683	274	-0.165753	274	-0.1554215	274	-0.1230471	274	-0.1705605
274.2	0.9621264	274.2	0.9267694	274.2	0.980826	274.2	1.02113	274.2	0.9759182	274.2	1.003463	274.2	1.015974	274.2	-0.1846865	274.2	-0.1544811	274.2	-0.2127445	274.2	-0.1656026	274.2	-0.1578964	274.2	-0.167692	274.2	-0.1551423	274.2	-0.1211756	274.2	-0.1691138
274.4	0.9617118	274.4	0.9267991	274.4	0.9777415	274.4	1.017	274.4	0.9725328	274.4	1.000286	274.4	1.023023	274.4	-0.1849506	274.4	-0.1596065	274.4	-0.2162316	274.4	-0.1690146	274.4	-0.1577958	274.4	-0.1658385	274.4	-0.1564713	274.4	-0.1227432	274.4	-0.1680996
274.6	0.9620785	274.6	0.9316902	274.6	0.9774672	274.6	1.016804	274.6	0.967716	274.6	1.001642	274.6	1.018332	274.6	-0.1890814	274.6	-0.1546563	274.6	-0.2118758	274.6	-0.1716087	274.6	-0.1591064	274.6	-0.164554	274.6	-0.1536647	274.6	-0.1202028	274.6	-0.1648285
274.8	0.9605238	274.8	0.9314648	274.8	0.979992	274.8	1.014424	274.8	0.9726382	274.8	1.000172	274.8	1.01769	274.8	-0.1857184	274.8	-0.1583714	274.8	-0.2170885	274.8	-0.1697352	274.8	-0.1573649	274.8	-0.1669248	274.8	-0.1505997	274.8	-0.116949	274.8	-0.1707714
275	0.9594815	275	0.9318645	275	0.9823732	275	1.017252	275	0.9721602	275	1.00429	275	1.021984	275	-0.18554	275	-0.1561091	275	-0.214535	275	-0.1748371	275	-0.1578265	275	-0.1606796	275	-0.1552144	275	-0.1198814	275	-0.1714004
275.2	0.9642637	275.2	0.9310421	275.2	0.9771202	275.2	1.017557	275.2	0.9758902	275.2	1.004112	275.2	1.020305	275.2	-0.187231	275.2	-0.1582319	275.2	-0.2113109	275.2	-0.1674894	275.2	-0.1517476	275.2	-0.1661423	275.2	-0.1558669	275.2	-0.118918	275.2	-0.1717701
275.4	0.9595967	275.4	0.9339677	275.4	0.9802445	275.4	1.015038	275.4	0.9777134	275.4	1.004777	275.4	1.017548	275.4	-0.187553	275.4	-0.1566531	275.4	-0.2145951	275.4	-0.1674758	275.4	-0.1569127	275.4	-0.1631713	275.4	-0.1549833	275.4	-0.122591	275.4	-0.1645579
275.6	0.9659721	275.6	0.9315641	275.6	0.977902	275.6	1.021606	275.6	0.9751177	275.6	1.006782	275.6	1.020423	275.6	-0.1862822	275.6	-0.1504637	275.6	-0.2099622	275.6	-0.1660724	275.6	-0.1579302	275.6	-0.1647497	275.6	-0.1507833	275.6	-0.1223663	275.6	-0.1639394
275.8	0.9633555	275.8	0.9313199	275.8	0.9806591	275.8	1.013734	275.8	0.9753343	275.8	1.005994	275.8	1.019011	275.8	-0.1810996	275.8	-0.1511621	275.8	-0.2150809	275.8	-0.1717481	275.8	-0.1572066	275.8	-0.1595909	275.8	-0.1581963	275.8	-0.1180384	275.8	-0.1653345
276	0.955901	276	0.9309503	276	0.9809926	276	1.017284	276	0.9711285	276	1.004027	276	1.021803	276	-0.1866595	276	-0.1516323	276	-0.2176912	276	-0.168872	276	-0.1554238	276	-0.1638977	276	-0.1529661	276	-0.1176703	276	-0.1710031
276.2	0.9664772	276.2	0.9333037	276.2	0.9805212	276.2	1.018616	276.2	0.9734966	276.2	1.001289	276.2	1.025288	276.2	-0.1816419	276.2	-0.1550997	276.2	-0.2180048	276.2	-0.1691661	276.2	-0.1568644	276.2	-0.1682723	276.2	-0.1564385	276.2	-0.1182844	276.2	-0.1661272
276.4	0.9669855	276.4	0.9306251	276.4	0.9791071	276.4	1.016584	276.4	0.9762681	276.4	1.001396	276.4	1.020885	276.4	-0.1843588	276.4	-0.1574998	276.4	-0.2167294	276.4	-0.1687205	276.4	-0.1578127	276.4	-0.1672137	276.4	-0.1539011	276.4	-0.1157618	276.4	-0.1632209
276.6	0.963649	276.6	0.9303403	276.6	0.984091	276.6	1.016555	276.6	0.9719632	276.6	1.005171	276.6	1.020181	276.6	-0.184036	276.61	-0.1502748	276.61	-0.2126704	276.61	-0.1703726	276.61	-0.1527125	276.61	-0.1640096	276.61	-0.1529132	276.61	-0.1233781	276.61	-0.1694443
276.8	0.9634881	276.8	0.9366783	276.8	0.9859307	276.8	1.018933	276.8	0.9794907	276.8	1.0056	276.8	1.02196	276.8	-0.1844024	276.8	-0.1573284	276.8	-0.210855	276.8	-0.1631946	276.8	-0.1501739	276.8	-0.1639491	276.8	-0.151958	276.8	-0.1210674	276.8	-0.1663381
277	0.9666659	277	0.9287158	277	0.9833653	277	1.024388	277	0.9753038	277	1.004732	277	1.018754	277	-0.186321	277	-0.1514335	277	-0.2125135	277	-0.1686077	277	-0.1547157	277	-0.167522	277	-0.1515241	277	-0.1177398	277	-0.16952
277.2	0.9622438	277.2	0.9303352	277.2	0.9825652	277.2	1.023845	277.2	0.9755931	277.2	1.002609	277.2	1.018873	277.2	-0.1839047	277.2	-0.1510795	277.2	-0.2143828	277.2	-0.1716004	277.2	-0.1565969	277.2	-0.164605	277.2	-0.1555746	277.2	-0.1232101	277.2	-0.1652169
277.4	0.9631553	277.4	0.9344662	277.4	0.9824046	277.4	1.02223	277.4	0.9744834	277.4	1.005467	277.4	1.019298	277.4	-0.1857578	277.4	-0.158225	277.4	-0.2146495	277.4	-0.1643246	277.4	-0.1579747	277.4	-0.1624574	277.4	-0.1549166	277.4	-0.1174987	277.4	-0.1689502
277.6	0.9611365	277.6	0.928369	277.6	0.9812465	277.6	1.020185	277.6	0.9739093	277.6	1.004592	277.6	1.015135	277.6	-0.1826081	277.6	-0.1523501	277.6	-0.2119514	277.6	-0.1682024	277.6	-0.1586425	277.6	-0.1586427	277.6	-0.1553192	277.6	-0.1189695	277.6	-0.165854
277.8	0.9652222	277.8	0.9309408	277.8	0.9799663	277.8	1.016094	277.8	0.9705877	277.8	1.00445	277.8	1.024033	277.8	-0.1843853	277.8	-0.152969	277.8	-0.2148413	277.8	-0.1671541	277.8	-0.1553473	277.8	-0.1608254	277.8	-0.1512405	277.8	-0.1194401	277.8	-0.1652626
278	0.9662452	278	0.9354661	278	0.9805365	278	1.017709	278	0.9763694	278	1.000837	278	1.024205	278	-0.1859868	278	-0.1543665	278	-0.2134956	278	-0.1643801	278	-0.1559095	278	-0.1619378	278	-0.1476721	278	-0.1205816	278	-0.1646708
278.2	0.9612272	278.2	0.9307499	278.2	0.9877018	278.2	1.018914	278.2	0.977389	278.2	1.006437	278.2	1.021464	278.2	-0.184066	278.2	-0.1541699	278.2	-0.2132187	278.2	-0.1652325	278.2	-0.1538295	278.2	-0.1604926	278.2	-0.1515512	278.2	-0.1182962	278.2	-0.1647001
278.4	0.9584929	278.4	0.9283378	278.4	0.9792706	278.4	1.024448	278.4	0.9795043	278.4	1.002971	278.4	1.020729	278.4	-0.1846342	278.4	-0.1521004	278.4	-0.2133772	278.4	-0.1661296	278.4	-0.155981	278.4	-0.1654034	278.4	-0.1548232	278.4	-0.1228736	278.4	-0.1675446
278.6	0.9697229	278.6	0.9302155	278.6	0.9859517	278.6	1.02206	278.6	0.9708992	278.6	1.001488	278.6	1.020687	278.6	-0.1843968	278.6	-0.1527213	278.6	-0.2107922	278.6	-0.1656	278.6	-0.1559107	278.6	-0.1609742	278.6	-0.1561527	278.6	-0.1229855	278.6	-0.1660205
278.8	0.9685056	278.8	0.9291471	278.8	0.9833453	278.8	1.020872	278.8	0.9819552	278.8	1.006729	278.8	1.020863	278.8	-0.1847489	278.8	-0.1486911	278.8	-0.2131479	278.8	-0.1687383	278.8	-0.1555198	278.8	-0.1635757	278.8	-0.151601	278.8	-0.1191024	278.8	-0.1624097
279	0.9670098	279	0.9345049	279	0.9824853	279	1.020628	279	0.9762375	279	1.008227	279	1.021183	279	-0.1826849	279	-0.1499597	279	-0.2133077	279	-0.1644324	279	-0.1508714	279	-0.1631439	279	-0.1506864	279	-0.1198763	279	-0.1674511
279.2	0.9654887	279.2	0.9340323	279.2	0.9818855	279.2	1.026554	279.2	0.9772364	279.2	1.002436	279.2	1.021511	279.2	-0.1816875	279.2	-0.1499605	279.2	-0.2163456	279.2	-0.1667799	279.2	-0.1543468	279.2	-0.1611066	279.2	-0.1508472	279.2	-0.1199615	279.2	-0.1620819
279.4	0.9676903	279.4	0.9362243	279.4	0.9849727	279.4	1.018705	279.4	0.9767801	279.4	1.002038	279.4	1.027048	279.4	-0.1830772	279.4	-0.1520761	279.4	-0.2149511	279.4	-0.1692573	279.4	-0.1567391	279.4	-0.1596359	279.4	-0.152838	279.4	-0.113874	279.4	-0.1671772
279.6	0.9683826	279.6	0.9341685	279.6	0.9813287	279.6	1.021707	279.6	0.9726729	279.6	1.004398	279.6	1.019397	279.6	-0.1853465	279.6	-0.1532092	279.6	-0.2117689	279.6	-0.1654169	279.6	-0.153529	279.6	-0.1559025	279.6	-0.1504657	279.6	-0.1227655	279.6	-0.1653058
279.8	0.9618337	279.8	0.9298292	279.8	0.9846755	279.8	1.021912	279.8	0.9763939	279.8	1.003348	279.8	1.023674	279.8	-0.1815291	279.8	-0.1504039	279.8	-0.2102337	279.8	-0.1665238	279.8	-0.1577137	279.8	-0.1600869	279.8	-0.1501034	279.8	-0.117989	279.8	-0.1655298
280	0.9670776	280	0.9326625	280	0.9855071	280	1.02001	280	0.9747058	280	1.008621	280	1.025177	280	-0.1826657	280	-0.1521228	280	-0.2142481	280	-0.1690826	280	-0.1553583	280	-0.1571481	280	-0.1490087	280	-0.1194527	280	-0.1639644
280.2	0.962559	280.2	0.9339243	280.2	0.9826612	280.2	1.015582	280.2	0.9800553	280.2	1.007928	280.2	1.023118	280.2	-0.1839512	280.2	-0.1490627	280.2	-0.2124988	280.2	-0.161064	280.2	-0.1515964	280.2	-0.1616756	280.2	-0.1525231	280.2	-0.1138603	280.2	-0.1672498
280.4	0.9644363	280.4	0.9305491	280.4	0.9849101	280.4	1.022779	280.4	0.9767442	280.4	1.006784	280.4	1.021695	280.4	-0.1860455	280.4	-0.1486481	280.4	-0.2111986	280.4	-0.1699345	280.4	-0.1528547	280.4	-0.1613705	280.4	-0.1462466	280.4	-0.1206733	280.4	-0.1642722
280.6	0.9685261	280.6	0.933502	280.6	0.9847164	280.6	1.023111	280.6	0.9782056	280.6	1.001215	280.6	1.02375	280.6	-0.1767261	280.6	-0.1514068	280.6	-0.2114341	280.6	-0.1661515	280.6	-0.15455	280.6	-0.1611142	280.6	-0.1486476	280.6	-0.1170745	280.6	-0.1669378
280.8	0.9643556	280.8	0.9344023	280.8	0.9815418	280.8	1.020095	280.8	0.9763402	280.8	1.006409	280.8	1.02602	280.8	-0.1817136	280.8	-0.1523602	280.8	-0.2136186	280.8	-0.1647316	280.8	-0.1517859	280.8	-0.1566535	280.8	-0.1538351	280.8	-0.1192102	280.8	-0.1664548
281	0.9652614	281	0.9366521	281	0.9800448	281	1.021275	281	0.9780591	281	1.002296	281	1.024121	281	-0.182894	281	-0.1499607	281	-0.2104571	281	-0.1594369	281	-0.1542917	281	-0.1629667	281	-0.1511079	281	-0.1142687	281	-0.1623912
281.2	0.9682463	281.2	0.9362961	281.2	0.9850487	281.2	1.020201	281.2	0.9791279	281.2	1.005364	281.2	1.021107	281.2	-0.184437	281.2	-0.1529665	281.2	-0.2095139	281.2	-0.1694682	281.2	-0.1521699	281.2	-0.1598918	281.2	-0.1462852	281.2	-0.118195	281.2	-0.1639222
281.4	0.9637454	281.4	0.9328245	281.4	0.9843349	281.4	1.022478	281.4	0.9799891	281.4	0.9983782	281.4	1.02104	281.4	-0.1839498	281.4	-0.1550602	281.4	-0.2132003	281.4	-0.1626522	281.4	-0.1526726	281.4	-0.1566153	281.4	-0.1469833	281.4	-0.1166074	281.4	-0.1650439
281.6	0.9639499	281.6	0.9307814	281.6	0.9843003	281.6	1.023911	281.6	0.978213	281.6	1.004125	281.6	1.020816	281.6	-0.184554	281.6	-0.1484543	281.6	-0.2061961	281.6	-0.1622517	281.6	-0.1521672	281.6	-0.1600893	281.6	-0.1511655	281.6	-0.1188031	281.6	-0.1648491
281.8	0.9707335	281.8	0.9356091	281.8	0.9845674	281.8	1.021847	281.8	0.9798213	281.8	1.00601	281.8	1.025992	281.8	-0.1828373	281.8	-0.1471028	281.8	-0.2118616	281.8	-0.1608969	281.8	-0.1510265	281.8	-0.160185	281.8	-0.1464603	281.8	-0.1189742	281.8	-0.1657752
282	0.9655693	282	0.934065	282	0.9832824	282	1.022871	282	0.9795341	282	1.008036	282	1.024767	282	-0.1805789	282	-0.1447435	282	-0.2088673	282	-0.170436	282	-0.1533188	282	-0.158279	282	-0.1539406	282	-0.1147938	282	-0.1623949
282.2	0.9693488	282.2	0.9335417	282.2	0.9879467	282.2	1.017705	282.2	0.9759805	282.2	1.007278	282.2	1.021357	282.2	-0.182876	282.2	-0.1491447	282.2	-0.2094408	282.2	-0.1675774	282.2	-0.1503449	282.2	-0.1588436	282.2	-0.1524204	282.2	-0.1193785	282.2	-0.1647747
282.4	0.9644838	282.4	0.9291862	282.4	0.9885975	282.4	1.023152	282.4	0.9803151	282.4	1.005754	282.4	1.026439	282.4	-0.1852825	282.4	-0.1482138	282.4	-0.2105128	282.4	-0.1646314	282.4	-0.1499908	282.4	-0.159341	282.4	-0.1477217	282.4	-0.1156609	282.4	-0.1631276
282.6	0.9663125	282.6	0.9392303	282.6	0.98957	282.6	1.022598	282.6	0.9774777	282.6	1.007687	282.6	1.025975	282.6	-0.1798359	282.6	-0.152152	282.6	-0.2101223	282.6	-0.1630198	282.6	-0.1534679	282.6	-0.1571634	282.6	-0.15077	282.6	-0.1152833	282.6	-0.1634523
282.8	0.9634943	282.8	0.9338807	282.8	0.9905056	282.8	1.017821	282.8	0.9811749	282.8	1.002488	282.8	1.023623	282.8	-0.1876752	282.8	-0.1441626	282.8	-0.2098545	282.8	-0.1656242	282.8	-0.1533843	282.8	-0.1594882	282.8	-0.152142	282.8	-0.1125999	282.8	-0.1646221
283	0.9686726	283	0.9351856	283	0.9821159	283	1.024593	283	0.9768016	283	1.004523	283	1.025134	283	-0.1807493	283	-0.1464616	283	-0.2124585	283	-0.1615648	283	-0.1516191	283	-0.1570706	283	-0.1517518	283	-0.1124178	283	-0.1594839
283.2	0.9656817	283.2	0.9372382	283.2	0.9848166	283.2	1.021028	283.2	0.9771916	283.2	1.006104	283.2	1.023635	283.2	-0.1751805	283.2	-0.1495995	283.2	-0.2084579	283.2	-0.1629395	283.2	-0.1509363	283.2	-0.1577153	283.2	-0.1483367	283.2	-0.1165847	283.2	-0.1639583
283.4	0.9687302	283.4	0.9329928	283.4	0.9781349	283.4	1.022846	283.4	0.9834726	283.4	1.006658	283.4	1.024803	283.4	-0.1838744	283.4	-0.1438449	283.4	-0.2138488	283.4	-0.1621224	283.4	-0.1503563	283.4	-0.1586409	283.4	-0.1495125	283.4	-0.1127878	283.4	-0.1614529
283.6	0.9657119	283.6	0.9357956	283.6	0.9858859	283.6	1.022393	283.6	0.9763829	283.6	1.003254	283.6	1.030737	283.6	-0.1785191	283.6	-0.1480853	283.6	-0.2127576	283.6	-0.1625258	283.6	-0.1543523	283.6	-0.1546298	283.6	-0.1527438	283.6	-0.1134318	283.6	-0.1609276
283.8	0.9674816	283.8	0.9324856	283.8	0.9862378	283.8	1.022061	283.8	0.9799591	283.8	1.005118	283.8	1.022275	283.8	-0.1811664	283.8	-0.1492579	283.8	-0.2138421	283.8	-0.1696236	283.8	-0.1550268	283.8	-0.159971	283.8	-0.1514382	283.8	-0.1122366	283.8	-0.1633584
284	0.9657165	284	0.9378007	284	0.9837117	284	1.026372	284	0.9779248	284	1.010476	284	1.028634	284	-0.1826103	284	-0.1444412	284	-0.2141663	284	-0.1635754	284	-0.1500521	284	-0.1568476	284	-0.1493895	284	-0.1196104	284	-0.1647399
284.2	0.9699205	284.2	0.9373654	284.2	0.9822016	284.2	1.024459	284.2	0.9810652	284.2	1.003962	284.2	1.023551	284.2	-0.1806027	284.2	-0.1498291	284.2	-0.2102563	284.2	-0.1635347	284.2	-0.1491244	284.2	-0.1591866	284.2	-0.1493912	284.2	-0.1142423	284.2	-0.1626088
284.4	0.9671777	284.4	0.9353551	284.4	0.9843323	284.4	1.018636	284.4	0.9747427	284.4	1.007384	284.4	1.026212	284.4	-0.1759248	284.4	-0.1490283	284.4	-0.2066586	284.4	-0.1640576	284.4	-0.1557912	284.4	-0.1608759	284.4	-0.1532191	284.4	-0.1116883	284.4	-0.1591527
284.6	0.9632626	284.6	0.9380497	284.6	0.9857178	284.6	1.024877	284.6	0.9804226	284.6	1.007171	284.6	1.022052	284.6	-0.1791284	284.6	-0.1496952	284.6	-0.2067892	284.6	-0.1621573	284.6	-0.1504656	284.6	-0.1595194	284.6	-0.1506271	284.6	-0.1119349	284.6	-0.1660597
284.8	0.9703415	284.8	0.94392	284.8	0.98852	284.8	1.02234	284.8	0.978941	284.8	1.007191	284.8	1.01965	284.8	-0.1780368	284.8	-0.1447246	284.8	-0.2092949	284.8	-0.1589435	284.8	-0.1484788	284.8	-0.1565658	284.8	-0.1464984	284.8	-0.1145327	284.8	-0.1647615
285	0.9691364	285	0.9317539	285	0.9884521	285	1.028232	285	0.9795013	285	1.012559	285	1.026135	285	-0.1823183	285	-0.1508112	285	-0.2138205	285	-0.1588987	285	-0.1542315	285	-0.159124	285	-0.1449388	285	-0.115709	285	-0.160089
285.22	0.9700234	285.22	0.9372597	285.22	0.9847598	285.22	1.024861	285.22	0.9834199	285.22	1.009012	285.22	1.022719	285.22	-0.1766683	285.2	-0.1481012	285.2	-0.2126251	285.2	-0.15732	285.2	-0.1503845	285.2	-0.1594776	285.2	-0.1506764	285.2	-0.1159943	285.2	-0.1600283
285.4	0.9696972	285.4	0.9382783	285.4	0.9896285	285.4	1.025584	285.4	0.9780905	285.4	1.008408	285.4	1.026568	285.4	-0.1803217	285.4	-0.14902	285.4	-0.2075094	285.4	-0.1653262	285.4	-0.1511933	285.4	-0.1547141	285.4	-0.1462269	285.4	-0.1139006	285.4	-0.1644451
285.6	0.9712493	285.6	0.9433762	285.6	0.9855023	285.6	1.022717	285.6	0.9828876	285.6	1.00591	285.6	1.02843	285.6	-0.1748699	285.6	-0.1464317	285.6	-0.2072167	285.6	-0.164747	285.6	-0.1498061	285.6	-0.1545991	285.6	-0.1473247	285.6	-0.1165147	285.6	-0.1680469
285.8	0.968253	285.8	0.9345822	285.8	0.9880255	285.8	1.025442	285.8	0.9805928	285.8	1.004861	285.8	1.026714	285.8	-0.1735052	285.8	-0.1467342	285.8	-0.2067639	285.8	-0.162095	285.8	-0.1550634	285.8	-0.1583877	285.8	-0.1493507	285.8	-0.1181569	285.8	-0.1638575
286	0.9679909	286	0.9353496	286	0.9859664	286	1.022134	286	0.9780879	286	1.004099	286	1.025346	286	-0.1833564	286	-0.1489974	286	-0.2084017	286	-0.160257	286	-0.1502389	286	-0.1569976	286	-0.1491669	286	-0.113806	286	-0.1644582
286.2	0.9698445	286.2	0.9316618	286.2	0.9908477	286.2	1.022736	286.2	0.9796652	286.2	1.004523	286.2	1.029777	286.2	-0.1775158	286.23	-0.1496677	286.23	-0.2044476	286.23	-0.1634525	286.23	-0.1508462	286.23	-0.1591103	286.23	-0.1497401	286.23	-0.1129681	286.23	-0.1635666
286.4	0.9636049	286.4	0.9355219	286.4	0.9880303	286.4	1.026262	286.4	0.983962	286.4	1.004062	286.4	1.026249	286.4	-0.1794074	286.4	-0.1479438	286.4	-0.2086378	286.4	-0.1635302	286.4	-0.1522701	286.4	-0.1606252	286.4	-0.1435768	286.4	-0.1135255	286.4	-0.1663121
286.6	0.9664391	286.6	0.9332432	286.6	0.9870368	286.6	1.020254	286.6	0.9786016	286.6	1.009971	286.6	1.028154	286.6	-0.1816763	286.6	-0.1437706	286.6	-0.2090079	286.6	-0.1598952	286.6	-0.1502834	286.6	-0.1562099	286.6	-0.1462107	286.6	-0.1136901	286.6	-0.1609634
286.8	0.9726795	286.8	0.9376971	286.8	0.9869458	286.8	1.025441	286.8	0.9795964	286.8	1.004548	286.8	1.025062	286.8	-0.1742698	286.8	-0.1505465	286.8	-0.2045195	286.8	-0.1631706	286.8	-0.1461611	286.8	-0.1585365	286.8	-0.1490139	286.8	-0.1111177	286.8	-0.1623851
287	0.9690581	287	0.9367684	287	0.9881504	287	1.023865	287	0.9820505	287	1.004354	287	1.022074	287	-0.1790355	287	-0.1461465	287	-0.2057948	287	-0.1597429	287	-0.1502183	287	-0.1593846	287	-0.1487458	287	-0.1199816	287	-0.1610864
287.2	0.9685597	287.2	0.9393254	287.2	0.9839783	287.2	1.022066	287.2	0.9770508	287.2	1.008398	287.2	1.027636	287.2	-0.1800473	287.2	-0.1499376	287.2	-0.2070172	287.2	-0.1622846	287.2	-0.1512947	287.2	-0.1564493	287.2	-0.1480906	287.2	-0.1153295	287.2	-0.1622594
287.4	0.9693047	287.4	0.9340644	287.4	0.987762	287.4	1.022204	287.4	0.9791278	287.4	1.007076	287.4	1.027033	287.4	-0.1760709	287.4	-0.1462135	287.4	-0.2040934	287.4	-0.1598774	287.4	-0.14869	287.4	-0.1507718	287.4	-0.1470214	287.4	-0.1147359	287.4	-0.1642253
287.6	0.970496	287.6	0.9341512	287.6	0.9876867	287.6	1.027514	287.6	0.9805567	287.6	1.010283	287.6	1.029848	287.6	-0.179123	287.6	-0.1501512	287.6	-0.2111294	287.6	-0.1629763	287.6	-0.1533737	287.6	-0.1523654	287.6	-0.1465491	287.6	-0.1117025	287.6	-0.156947
287.8	0.9669776	287.8	0.9383432	287.8	0.9904489	287.8	1.023558	287.8	0.9819881	287.8	1.003782	287.8	1.024303	287.8	-0.1814505	287.8	-0.1466289	287.8	-0.2060574	287.8	-0.1572861	287.8	-0.150369	287.8	-0.1622232	287.8	-0.1464994	287.8	-0.1131187	287.8	-0.1642245
288	0.9706779	288	0.9329345	288	0.9907215	288	1.026024	288	0.9831832	288	1.006565	288	1.026079	288	-0.1781941	288	-0.1465388	288	-0.2102673	288	-0.1568765	288	-0.151367	288	-0.1543913	288	-0.1459379	288	-0.1112722	288	-0.1592176
288.2	0.9688593	288.2	0.9401994	288.2	0.9887671	288.2	1.02497	288.2	0.9810433	288.2	1.00845	288.2	1.026195	288.2	-0.1778502	288.2	-0.1475051	288.2	-0.2071139	288.2	-0.1619729	288.2	-0.1486313	288.2	-0.1525221	288.2	-0.1481363	288.2	-0.1130744	288.2	-0.1609346
288.4	0.9681861	288.4	0.9382934	288.4	0.9882153	288.4	1.022849	288.4	0.9843269	288.4	1.008889	288.4	1.025725	288.4	-0.1766925	288.4	-0.1478061	288.4	-0.208128	288.4	-0.1594426	288.4	-0.1481666	288.4	-0.1547093	288.4	-0.1445164	288.4	-0.1130935	288.4	-0.1621334
288.6	0.9717436	288.6	0.9361345	288.6	0.9908536	288.6	1.023348	288.6	0.9774388	288.6	1.005491	288.6	1.025276	288.6	-0.178596	288.6	-0.1453263	288.6	-0.2077369	288.6	-0.1590204	288.6	-0.1462895	288.6	-0.1561887	288.6	-0.1430669	288.6	-0.1149186	288.6	-0.1612755
288.8	0.9700197	288.8	0.9402215	288.8	0.9877369	288.8	1.0215	288.8	0.9843758	288.8	1.006375	288.8	1.027473	288.8	-0.1814936	288.8	-0.1501914	288.8	-0.2064168	288.8	-0.1597358	288.8	-0.1475877	288.8	-0.1573242	288.8	-0.1483897	288.8	-0.1155744	288.8	-0.1653602
289	0.9670681	289	0.9355173	289	0.9888639	289	1.027557	289	0.9769042	289	1.012007	289	1.025394	289	-0.1793397	289	-0.1476759	289	-0.2053521	289	-0.1602761	289	-0.1472959	289	-0.158219	289	-0.1416479	289	-0.1143702	289	-0.1594469
289.2	0.9659014	289.2	0.9350144	289.2	0.9916636	289.2	1.02484	289.2	0.9858996	289.2	1.012328	289.2	1.029738	289.2	-0.1791947	289.2	-0.1507902	289.2	-0.2047273	289.2	-0.1629299	289.2	-0.1481936	289.2	-0.1566633	289.2	-0.145915	289.2	-0.1121658	289.2	-0.1584777
289.4	0.9683685	289.4	0.9358383	289.4	0.9938918	289.4	1.025194	289.4	0.9859139	289.4	1.01082	289.4	1.028966	289.4	-0.1775503	289.4	-0.1473785	289.4	-0.2042017	289.4	-0.157932	289.4	-0.1440712	289.4	-0.1561131	289.4	-0.1464061	289.4	-0.1154808	289.4	-0.1584109
289.6	0.9722894	289.6	0.941735	289.6	0.9898154	289.6	1.025727	289.6	0.9847097	289.6	1.009472	289.6	1.028108	289.6	-0.1777941	289.6	-0.1487128	289.6	-0.2081472	289.6	-0.1584914	289.6	-0.1439964	289.6	-0.1555796	289.6	-0.1441978	289.6	-0.1159081	289.6	-0.1598493
289.8	0.9695436	289.8	0.9368483	289.8	0.9915594	289.8	1.020906	289.8	0.9849241	289.8	1.011196	289.8	1.027693	289.8	-0.178923	289.8	-0.1477515	289.8	-0.2065473	289.8	-0.160498	289.8	-0.1469975	289.8	-0.1543075	289.8	-0.1470911	289.8	-0.1122588	289.8	-0.1614093
290	0.9599325	290	0.9300538	290	0.9789816	290	1.021382	290	0.9717865	290	1.003975	290	1.029322	290	-0.1780164	290	-0.1552757	290	-0.2167577	290	-0.1721243	290	-0.1507342	290	-0.1584678	290	-0.1482308	290	-0.1091719	290	-0.1612167
290.2	0.9591153	290.2	0.9319218	290.2	0.9816933	290.2	1.021812	290.2	0.9776328	290.2	1.006456	290.2	1.032078	290.2	-0.1753177	290.2	-0.1522059	290.2	-0.2141082	290.2	-0.1686886	290.2	-0.15192	290.2	-0.15671	290.2	-0.150619	290.2	-0.1118436	290.2	-0.1582647
290.4	0.9626141	290.4	0.932134	290.4	0.9812396	290.4	1.023167	290.4	0.9747686	290.4	1.005093	290.4	1.027174	290.4	-0.1739758	290.4	-0.1546394	290.4	-0.2139186	290.4	-0.1647544	290.4	-0.155257	290.4	-0.1630852	290.4	-0.145271	290.4	-0.1113259	290.4	-0.1556152
290.6	0.9624043	290.6	0.9297596	290.6	0.9803939	290.6	1.023474	290.6	0.9779002	290.6	1.005384	290.6	1.030074	290.6	-0.1709341	290.6	-0.152828	290.6	-0.2164246	290.6	-0.1661277	290.6	-0.1556001	290.6	-0.1641192	290.6	-0.1468161	290.6	-0.1129958	290.6	-0.1579102
290.8	0.9657379	290.8	0.9329161	290.8	0.987887	290.8	1.022636	290.8	0.978684	290.8	1.009217	290.8	1.034609	290.8	-0.1744305	290.8	-0.1486994	290.8	-0.2092523	290.8	-0.1672475	290.8	-0.1469995	290.8	-0.1590091	290.8	-0.144042	290.8	-0.1068845	290.8	-0.1584471
291	0.9635029	291	0.9293558	291	0.9832554	291	1.023195	291	0.9809703	291	1.005991	291	1.035802	291	-0.1699279	291	-0.154759	291	-0.2136346	291	-0.1643205	291	-0.1492942	291	-0.1564575	291	-0.1462222	291	-0.1127675	291	-0.1554173
291.2	0.9611021	291.2	0.9328616	291.2	0.9858999	291.2	1.022427	291.2	0.9754165	291.2	1.01307	291.2	1.027502	291.2	-0.1755592	291.2	-0.154168	291.2	-0.2173117	291.2	-0.164314	291.2	-0.1529801	291.2	-0.1604814	291.2	-0.1491043	291.2	-0.1093435	291.2	-0.1524004
291.4	0.9666314	291.4	0.9330918	291.4	0.9850343	291.4	1.020679	291.4	0.9794396	291.4	1.010354	291.4	1.032812	291.4	-0.1729088	291.4	-0.1529612	291.4	-0.2150637	291.4	-0.1636892	291.4	-0.1469497	291.4	-0.1562873	291.4	-0.1485375	291.4	-0.1133825	291.4	-0.1611917
291.6	0.9623073	291.6	0.9297177	291.6	0.9847093	291.6	1.019013	291.6	0.9805723	291.6	1.01246	291.6	1.033761	291.6	-0.1721083	291.6	-0.1590768	291.6	-0.2183579	291.6	-0.1683782	291.6	-0.1452797	291.6	-0.157078	291.6	-0.1448578	291.6	-0.1099315	291.6	-0.1580689
291.8	0.9662031	291.8	0.9327718	291.8	0.9867508	291.8	1.023171	291.8	0.9793171	291.8	1.010502	291.8	1.027996	291.8	-0.1705828	291.8	-0.1538434	291.8	-0.214245	291.8	-0.1579556	291.8	-0.1514897	291.8	-0.1545129	291.8	-0.1474661	291.8	-0.1086502	291.8	-0.1538769
292	0.9743927	292	0.9377664	292	0.9825996	292	1.0227	292	0.9830956	292	1.012574	292	1.032649	292	-0.1756422	292	-0.1533277	292	-0.2124254	292	-0.1633917	292	-0.14636	292	-0.1544739	292	-0.1432243	292	-0.1085614	292	-0.1540666
292.2	0.9697972	292.2	0.9357232	292.2	0.9911315	292.2	1.028926	292.2	0.9850511	292.2	1.004024	292.2	1.032488	292.2	-0.1724568	292.2	-0.1566849	292.2	-0.2124241	292.2	-0.1650316	292.2	-0.1508671	292.2	-0.1560806	292.2	-0.1433547	292.2	-0.1073555	292.2	-0.1575298
292.4	0.9716434	292.4	0.9419573	292.4	0.9905372	292.4	1.025809	292.4	0.9888375	292.4	1.005355	292.4	1.030666	292.4	-0.1681123	292.4	-0.1549315	292.4	-0.2112155	292.4	-0.1594764	292.4	-0.15249	292.4	-0.1563107	292.4	-0.1445739	292.4	-0.1096665	292.4	-0.1512137
292.6	0.9712991	292.6	0.9412901	292.6	0.9825875	292.6	1.027567	292.6	0.9809597	292.6	1.008247	292.6	1.033626	292.6	-0.1686	292.6	-0.1551938	292.6	-0.2150649	292.6	-0.1655908	292.6	-0.1486285	292.6	-0.1540014	292.6	-0.1461422	292.6	-0.1096969	292.6	-0.14991
292.8	0.9733896	292.8	0.9377369	292.8	0.9860545	292.8	1.031534	292.8	0.9829065	292.8	1.004825	292.8	1.031032	292.8	-0.1714052	292.8	-0.1546819	292.8	-0.215455	292.8	-0.1638465	292.8	-0.1446982	292.8	-0.156761	292.8	-0.1444488	292.8	-0.1063822	292.8	-0.1515261
293	0.973489	293	0.9403244	293	0.9833791	293	1.027677	293	0.9826221	293	1.010327	293	1.033894	293	-0.1670157	293	-0.1542211	293	-0.2134195	293	-0.1598037	293	-0.1470447	293	-0.1577242	293	-0.1435943	293	-0.1115825	293	-0.153206
293.2	0.9828007	293.2	0.9395387	293.2	0.9874774	293.2	1.026802	293.2	0.9763718	293.2	1.004393	293.2	1.028429	293.2	-0.1720901	293.2	-0.1519288	293.2	-0.2153704	293.2	-0.1625464	293.2	-0.1485482	293.2	-0.1575055	293.2	-0.1448933	293.2	-0.1061155	293.2	-0.1525741
293.4	0.9807211	293.4	0.9403783	293.4	0.9936097	293.4	1.025726	293.4	0.9833133	293.4	1.011855	293.4	1.03692	293.4	-0.1693861	293.4	-0.1498186	293.4	-0.2092261	293.4	-0.1658185	293.4	-0.1428243	293.4	-0.1575833	293.4	-0.1406566	293.4	-0.1051301	293.4	-0.1436413
293.6	0.9809978	293.6	0.9440105	293.6	0.9933938	293.6	1.028538	293.6	0.9804253	293.6	1.00876	293.6	1.031521	293.6	-0.1673145	293.6	-0.1540676	293.6	-0.2093797	293.6	-0.1625393	293.6	-0.1444774	293.6	-0.1579697	293.6	-0.14119	293.6	-0.1076027	293.6	-0.1516204
293.8	0.9861156	293.8	0.9458497	293.8	0.9906493	293.8	1.027913	293.8	0.9839564	293.8	1.013629	293.8	1.03106	293.8	-0.1698092	293.8	-0.155711	293.8	-0.2056313	293.8	-0.1632676	293.8	-0.1455645	293.8	-0.1567734	293.8	-0.1453016	293.8	-0.1057357	293.8	-0.1461912
294	0.9843693	294	0.9437454	294	0.9898351	294	1.029089	294	0.9830308	294	1.010677	294	1.032956	294	-0.1652897	294	-0.1538998	294	-0.2170939	294	-0.163538	294	-0.1476416	294	-0.1591449	294	-0.1434575	294	-0.1100113	294	-0.1520804
294.2	0.9860702	294.2	0.9484273	294.2	0.9930172	294.2	1.027498	294.2	0.9847201	294.2	1.010745	294.2	1.032448	294.2	-0.165908	294.2	-0.1563602	294.2	-0.2117644	294.2	-0.1579296	294.2	-0.1476186	294.2	-0.1535251	294.2	-0.1404995	294.2	-0.1039956	294.2	-0.1512491
294.4	0.9867008	294.4	0.9514694	294.4	0.9932157	294.4	1.029802	294.4	0.9827363	294.4	1.008413	294.4	1.034245	294.4	-0.1677	294.4	-0.1560721	294.4	-0.2126973	294.4	-0.1612966	294.4	-0.1491659	294.4	-0.153678	294.4	-0.1451821	294.4	-0.100596	294.4	-0.1437647
294.6	0.9924549	294.6	0.9439777	294.6	0.9876611	294.6	1.030406	294.6	0.9840243	294.6	1.009047	294.6	1.034996	294.6	-0.1700078	294.6	-0.1557979	294.6	-0.2084855	294.6	-0.1585196	294.6	-0.1482808	294.6	-0.1573337	294.6	-0.1438094	294.6	-0.1079789	294.6	-0.152063
294.8	0.9911909	294.8	0.950056	294.8	0.9959601	294.8	1.028126	294.8	0.9817262	294.8	1.011327	294.8	1.034432	294.8	-0.1686475	294.8	-0.1564341	294.8	-0.2057938	294.8	-0.1632953	294.8	-0.1446412	294.8	-0.1528501	294.8	-0.144394	294.8	-0.1093815	294.8	-0.1491998
295	0.9911956	295	0.9501674	295	0.9902163	295	1.034084	295	0.9772759	295	1.007137	295	1.03594	295	-0.1676516	295	-0.1526672	295	-0.2091441	295	-0.1602124	295	-0.1463104	295	-0.1546207	295	-0.1422649	295	-0.1080318	295	-0.1488366
295.2	0.9952824	295.2	0.9530223	295.2	0.9952937	295.2	1.031546	295.2	0.9831952	295.2	1.010713	295.2	1.033654	295.2	-0.1700548	295.2	-0.150116	295.2	-0.207309	295.2	-0.1574776	295.2	-0.1451671	295.2	-0.1565618	295.2	-0.1414137	295.2	-0.1039735	295.2	-0.1461045
295.4	0.9962268	295.4	0.9549906	295.4	0.996461	295.4	1.036007	295.4	0.9868014	295.4	1.009985	295.4	1.034116	295.4	-0.1661648	295.4	-0.1543074	295.4	-0.215112	295.4	-0.1609849	295.4	-0.1473246	295.4	-0.1593953	295.4	-0.1440285	295.4	-0.1055145	295.4	-0.1503003
295.6	0.9950074	295.6	0.9536735	295.6	0.9933004	295.6	1.033423	295.6	0.9844919	295.6	1.009839	295.6	1.034749	295.6	-0.1664896	295.61	-0.1521588	295.61	-0.2104615	295.61	-0.1602528	295.61	-0.1442153	295.61	-0.1533862	295.61	-0.1404155	295.61	-0.1059678	295.61	-0.1474217
295.8	1.000385	295.8	0.9572466	295.8	0.9976535	295.8	1.030541	295.8	0.9838834	295.8	1.0119	295.8	1.036208	295.8	-0.1666319	295.8	-0.1546857	295.8	-0.2107748	295.8	-0.1585904	295.8	-0.1448356	295.8	-0.1562978	295.8	-0.1382678	295.8	-0.1084818	295.8	-0.147103
296	1.001351	296	0.9594446	296	0.9982878	296	1.029805	296	0.9830025	296	1.010381	296	1.03447	296	-0.1695874	296	-0.1546655	296	-0.2103164	296	-0.1579577	296	-0.1453703	296	-0.1566063	296	-0.1404489	296	-0.1069287	296	-0.1504057
296.2	1.00274	296.2	0.9584701	296.2	0.9940764	296.2	1.035226	296.2	0.9850729	296.2	1.009217	296.2	1.036326	296.2	-0.1703493	296.2	-0.1523098	296.2	-0.210649	296.2	-0.163549	296.2	-0.1434242	296.2	-0.152605	296.2	-0.1411716	296.2	-0.1078912	296.2	-0.1485359
296.4	1.003579	296.4	0.9543354	296.4	0.9978534	296.4	1.030689	296.4	0.9871412	296.4	1.012792	296.4	1.035849	296.4	-0.1695115	296.4	-0.1499924	296.4	-0.2108314	296.4	-0.1615524	296.4	-0.1417093	296.4	-0.1542606	296.4	-0.1393627	296.4	-0.110734	296.4	-0.1467904
296.6	1.00564	296.6	0.961467	296.6	1.001905	296.6	1.030463	296.6	0.9860284	296.6	1.010627	296.6	1.031538	296.6	-0.1703175	296.6	-0.1540275	296.6	-0.2088034	296.6	-0.1602351	296.6	-0.1438475	296.6	-0.1553847	296.6	-0.1429394	296.6	-0.1082963	296.6	-0.1411511
296.8	1.012282	296.8	0.9616984	296.8	1.000437	296.8	1.031782	296.8	0.984538	296.8	1.016392	296.8	1.036436	296.8	-0.1655996	296.8	-0.1558468	296.8	-0.2155824	296.8	-0.1596022	296.8	-0.1475634	296.8	-0.1537296	296.8	-0.1405168	296.8	-0.10673	296.8	-0.1478974
297	1.016896	297	0.9621684	297	1.003842	297	1.029827	297	0.985092	297	1.010784	297	1.033021	297	-0.1647993	297	-0.154397	297	-0.2075027	297	-0.1605603	297	-0.1397567	297	-0.1561272	297	-0.1375727	297	-0.1047275	297	-0.1493881
297.2	1.016492	297.2	0.9606304	297.2	1.000472	297.2	1.033388	297.2	0.9823002	297.2	1.010802	297.2	1.033957	297.2	-0.16438	297.2	-0.1526423	297.2	-0.2062112	297.2	-0.163449	297.2	-0.1440337	297.2	-0.152805	297.2	-0.1408105	297.2	-0.1071038	297.2	-0.1446207
297.4	1.014807	297.4	0.9631736	297.4	1.000786	297.4	1.033302	297.4	0.9889265	297.4	1.012109	297.4	1.03555	297.4	-0.1647786	297.4	-0.1574696	297.4	-0.2109447	297.4	-0.158909	297.4	-0.1421871	297.4	-0.1521348	297.4	-0.1388141	297.4	-0.1067217	297.4	-0.1472578
297.6	1.013606	297.6	0.9634541	297.6	1.002432	297.6	1.032369	297.6	0.9861624	297.6	1.015199	297.6	1.03061	297.6	-0.1657026	297.6	-0.1570694	297.6	-0.2090271	297.6	-0.1591011	297.6	-0.1444451	297.6	-0.1545282	297.6	-0.1429288	297.6	-0.1076207	297.6	-0.1476938
297.8	1.019524	297.8	0.9645023	297.8	1.006761	297.8	1.037489	297.8	0.9877913	297.8	1.012975	297.8	1.038783	297.8	-0.1672333	297.8	-0.1501138	297.8	-0.2048136	297.8	-0.1554304	297.8	-0.1472208	297.8	-0.1516941	297.8	-0.1431104	297.8	-0.1021798	297.8	-0.1510684
298	1.018147	298	0.9721732	298	1.002289	298	1.034195	298	0.9862688	298	1.01587	298	1.038346	298	-0.1680769	298	-0.1491988	298	-0.2091531	298	-0.1551252	298	-0.1451064	298	-0.1556418	298	-0.1363634	298	-0.1006336	298	-0.1446453
298.2	1.019033	298.2	0.9680085	298.2	1.006058	298.2	1.036059	298.2	0.9854075	298.2	1.011241	298.2	1.037058	298.2	-0.1629625	298.2	-0.1520925	298.2	-0.2041495	298.2	-0.1586974	298.2	-0.1412711	298.2	-0.1516733	298.2	-0.1441811	298.2	-0.1074416	298.2	-0.1453434
298.4	1.016427	298.4	0.9645126	298.4	1.002994	298.4	1.034489	298.4	0.9872069	298.4	1.012116	298.4	1.036763	298.4	-0.1662987	298.4	-0.1520654	298.4	-0.2116566	298.4	-0.1605035	298.4	-0.1412475	298.4	-0.1543569	298.4	-0.13893	298.4	-0.1026159	298.4	-0.1491051
298.6	1.022856	298.6	0.9680215	298.6	1.003541	298.6	1.035651	298.6	0.9880729	298.6	1.011234	298.6	1.035229	298.6	-0.1686999	298.6	-0.1545579	298.6	-0.2084642	298.6	-0.159053	298.6	-0.1432193	298.6	-0.151862	298.6	-0.1365593	298.6	-0.1078627	298.6	-0.1429319
298.8	1.026401	298.8	0.9658658	298.8	1.003006	298.8	1.041376	298.8	0.9869297	298.8	1.014383	298.8	1.035105	298.8	-0.1696071	298.8	-0.1489113	298.8	-0.206957	298.8	-0.158576	298.8	-0.1423551	298.8	-0.1535304	298.8	-0.1379865	298.8	-0.1031538	298.8	-0.1448861
299	1.025071	299	0.972182	299	1.013241	299	1.037433	299	0.9857025	299	1.016048	299	1.032884	299	-0.1649813	299	-0.1526431	299	-0.2064848	299	-0.1621249	299	-0.144192	299	-0.1531906	299	-0.1386753	299	-0.1071068	299	-0.1448315
299.2	1.028971	299.2	0.9719269	299.2	1.006975	299.2	1.036382	299.2	0.9882944	299.2	1.011497	299.2	1.039164	299.2	-0.1627673	299.2	-0.1501796	299.2	-0.2078285	299.2	-0.1600057	299.2	-0.1415187	299.2	-0.152082	299.2	-0.1366776	299.2	-0.09860862	299.2	-0.1490725
299.4	1.033471	299.4	0.9746734	299.4	1.008461	299.4	1.039821	299.4	0.9893748	299.4	1.011493	299.4	1.035679	299.4	-0.1686766	299.4	-0.1526525	299.4	-0.2053739	299.4	-0.1581437	299.4	-0.1402586	299.4	-0.1512223	299.4	-0.1395897	299.4	-0.1022326	299.4	-0.1457699
299.6	1.031076	299.6	0.9760168	299.6	1.006258	299.6	1.041621	299.6	0.9849861	299.6	1.008518	299.6	1.033398	299.6	-0.1657896	299.6	-0.1501298	299.6	-0.2055191	299.6	-0.1600443	299.6	-0.140544	299.6	-0.1571788	299.6	-0.1432104	299.6	-0.1048392	299.6	-0.1437758
299.8	1.032499	299.8	0.9772177	299.8	1.00805	299.8	1.035935	299.8	0.9903965	299.8	1.013286	299.8	1.036446	299.8	-0.1695456	299.8	-0.1477299	299.8	-0.2073312	299.8	-0.1581352	299.8	-0.1403625	299.8	-0.1510611	299.8	-0.1366465	299.8	-0.1051235	299.8	-0.149415
300.01	1.031031	300.01	0.9791186	300.01	1.01012	300.01	1.037993	300.01	0.9910569	300.01	1.009377	300.01	1.037759	300.01	-0.1653174	300	-0.1489763	300	-0.2038731	300	-0.1595811	300	-0.1404788	300	-0.1490807	300	-0.1375934	300	-0.1019273	300	-0.1471611
300.2	1.031006	300.2	0.9768484	300.2	1.011513	300.2	1.038885	300.2	0.9882648	300.2	1.012223	300.2	1.036748	300.2	-0.1602976	300.2	-0.1503785	300.2	-0.2055963	300.2	-0.1577199	300.2	-0.145618	300.2	-0.1518761	300.2	-0.1385494	300.2	-0.1060773	300.2	-0.1438651
300.4	1.04049	300.4	0.9745426	300.4	1.010485	300.4	1.041829	300.4	0.9895843	300.4	1.016122	300.4	1.038831	300.4	-0.1628634	300.4	-0.1517211	300.4	-0.2069027	300.4	-0.1599981	300.4	-0.1404284	300.4	-0.1529151	300.4	-0.1401071	300.4	-0.1029919	300.4	-0.144877
300.6	1.037173	300.6	0.9823188	300.6	1.010893	300.6	1.041174	300.6	0.9882926	300.6	1.01226	300.6	1.039197	300.6	-0.1621302	300.6	-0.1510831	300.6	-0.2043321	300.6	-0.1537513	300.6	-0.143117	300.6	-0.1480256	300.6	-0.1391629	300.6	-0.100372	300.6	-0.1472098
300.8	1.040917	300.8	0.9796891	300.8	1.0115	300.8	1.037929	300.8	0.9920372	300.8	1.015123	300.8	1.036144	300.8	-0.1658037	300.8	-0.1548319	300.8	-0.2056607	300.8	-0.1592959	300.8	-0.1427576	300.8	-0.1497263	300.8	-0.1349	300.8	-0.1064405	300.8	-0.1438462
301	1.042157	301	0.9821261	301	1.011365	301	1.043273	301	0.9928666	301	1.016769	301	1.039066	301	-0.165339	301	-0.1465575	301	-0.2065327	301	-0.157073	301	-0.1394528	301	-0.1489743	301	-0.1338584	301	-0.1036869	301	-0.1460152
301.2	1.040583	301.2	0.9810386	301.2	1.015873	301.2	1.040152	301.2	0.9917399	301.2	1.012616	301.2	1.037367	301.2	-0.1666505	301.2	-0.1516249	301.2	-0.2101366	301.2	-0.1625759	301.2	-0.1407447	301.2	-0.1518606	301.2	-0.1372643	301.2	-0.1058946	301.2	-0.1406943
301.4	1.042756	301.4	0.981594	301.4	1.015652	301.4	1.040379	301.4	0.9879746	301.4	1.012948	301.4	1.038228	301.4	-0.1633619	301.4	-0.1499421	301.4	-0.2031894	301.4	-0.1547481	301.4	-0.1359214	301.4	-0.1536546	301.4	-0.1376307	301.4	-0.1024814	301.4	-0.1414718
301.6	1.043654	301.6	0.9884627	301.6	1.01435	301.6	1.044	301.6	0.9901108	301.6	1.016813	301.6	1.038652	301.6	-0.1624876	301.6	-0.1474691	301.6	-0.2040935	301.6	-0.1550913	301.6	-0.1364013	301.6	-0.150756	301.6	-0.1362966	301.6	-0.105861	301.6	-0.1491718
301.8	1.045555	301.8	0.9838478	301.8	1.014247	301.8	1.041141	301.8	0.9856282	301.8	1.018253	301.8	1.042064	301.8	-0.1666805	301.8	-0.1476983	301.8	-0.2076107	301.8	-0.1546708	301.8	-0.1376495	301.8	-0.1471469	301.8	-0.1342967	301.8	-0.1022254	301.8	-0.1415929
302	1.048701	302	0.9908963	302	1.016129	302	1.045346	302	0.9919465	302	1.014223	302	1.039935	302	-0.1646276	302	-0.1519547	302	-0.2029604	302	-0.1594595	302	-0.1415278	302	-0.1527112	302	-0.1375809	302	-0.1018277	302	-0.1425632
302.2	1.043604	302.2	0.9846165	302.2	1.016217	302.2	1.040227	302.2	0.9948884	302.2	1.020953	302.2	1.038135	302.2	-0.1610233	302.2	-0.1489157	302.2	-0.2073632	302.2	-0.1546303	302.2	-0.1421941	302.2	-0.1479502	302.2	-0.1338079	302.2	-0.1004761	302.2	-0.1419954
302.4	1.051185	302.4	0.9862873	302.4	1.015154	302.4	1.0428	302.4	0.9948199	302.4	1.017035	302.4	1.036263	302.4	-0.1656887	302.4	-0.1466918	302.4	-0.2049065	302.4	-0.1595161	302.4	-0.1381975	302.4	-0.1510253	302.4	-0.1348858	302.4	-0.1055668	302.4	-0.1443937
302.6	1.050481	302.6	0.9932759	302.6	1.020155	302.6	1.046869	302.6	0.9909829	302.6	1.019504	302.6	1.039853	302.6	-0.1662741	302.6	-0.1514851	302.6	-0.2028989	302.6	-0.1581767	302.6	-0.1387468	302.6	-0.1510381	302.6	-0.1382968	302.6	-0.1018512	302.6	-0.1466652
302.8	1.053864	302.8	0.9901333	302.8	1.016303	302.8	1.045568	302.8	0.9922115	302.8	1.015302	302.8	1.04407	302.8	-0.1664102	302.8	-0.1469207	302.8	-0.2073954	302.8	-0.1551646	302.8	-0.1378282	302.8	-0.153174	302.8	-0.1354059	302.8	-0.09991333	302.8	-0.1398097
303	1.051038	303	0.9903625	303	1.016405	303	1.048435	303	1.000635	303	1.017805	303	1.038258	303	-0.1639017	303.03	-0.1467976	303.03	-0.2027449	303.03	-0.1572367	303.03	-0.1410215	303.03	-0.152996	303.03	-0.1334468	303.03	-0.1043062	303.03	-0.1419276
303.2	1.053951	303.2	0.9909338	303.2	1.019789	303.2	1.042822	303.2	0.9897994	303.2	1.017312	303.2	1.040206	303.2	-0.1629534	303.2	-0.1476533	303.2	-0.1993032	303.2	-0.1568615	303.2	-0.1440707	303.2	-0.1485311	303.2	-0.1321757	303.2	-0.1017866	303.2	-0.1464943
303.4	1.058357	303.4	0.991949	303.4	1.016432	303.4	1.048018	303.4	0.9938468	303.4	1.022403	303.4	1.042261	303.4	-0.1670476	303.4	-0.1502766	303.4	-0.2034005	303.4	-0.1537146	303.4	-0.1431468	303.4	-0.1500305	303.4	-0.1377665	303.4	-0.1042497	303.4	-0.142618
303.6	1.060952	303.6	0.9914832	303.6	1.017295	303.6	1.043912	303.6	0.9893957	303.6	1.018207	303.6	1.041264	303.6	-0.1635432	303.6	-0.1510305	303.6	-0.2008401	303.6	-0.1567194	303.6	-0.1410295	303.6	-0.1466699	303.6	-0.1348935	303.6	-0.1030802	303.6	-0.1465253
303.8	1.062748	303.8	0.9974192	303.8	1.019821	303.8	1.045966	303.8	0.9948118	303.8	1.018241	303.8	1.040998	303.8	-0.165257	303.8	-0.1514338	303.8	-0.2058948	303.8	-0.153386	303.8	-0.1432911	303.8	-0.1480225	303.8	-0.1351879	303.8	-0.1044514	303.8	-0.1403585
304	1.062842	304	0.9941674	304	1.019336	304	1.050694	304	0.9908841	304	1.017853	304	1.037873	304	-0.1622636	304	-0.1487427	304	-0.2070719	304	-0.1563812	304	-0.1365519	304	-0.1459911	304	-0.136063	304	-0.1028927	304	-0.1441855
304.2	1.065046	304.2	0.9974021	304.2	1.020594	304.2	1.047362	304.2	0.9975556	304.2	1.0186	304.2	1.040471	304.2	-0.1628922	304.2	-0.1472934	304.2	-0.2005315	304.2	-0.1587353	304.2	-0.1400004	304.2	-0.1494425	304.2	-0.130183	304.2	-0.1020965	304.2	-0.1395671
304.4	1.065917	304.4	0.9966947	304.4	1.023639	304.4	1.048625	304.4	0.9946005	304.4	1.023883	304.4	1.037585	304.4	-0.1623199	304.4	-0.1473673	304.4	-0.1993263	304.4	-0.1558614	304.4	-0.1375053	304.4	-0.1506457	304.4	-0.1355817	304.4	-0.1084884	304.4	-0.1433353
304.6	1.063608	304.6	1.000296	304.6	1.023749	304.6	1.052793	304.6	0.993361	304.6	1.016657	304.6	1.041977	304.6	-0.1632124	304.6	-0.1409332	304.6	-0.2074617	304.6	-0.1556677	304.6	-0.1428557	304.6	-0.1473544	304.6	-0.1373619	304.6	-0.1016315	304.6	-0.1423315
304.8	1.064181	304.8	0.9983493	304.8	1.025326	304.8	1.050236	304.8	0.9971128	304.8	1.017375	304.8	1.038512	304.8	-0.1635171	304.8	-0.1480958	304.8	-0.2052325	304.8	-0.1563151	304.8	-0.1369921	304.8	-0.1490309	304.8	-0.1353417	304.8	-0.09980591	304.8	-0.1426982
305	1.063355	305	0.9992508	305	1.027495	305	1.050553	305	0.9973372	305	1.019319	305	1.036103	305	-0.1609082	305	-0.1462506	305	-0.2011738	305	-0.1526725	305	-0.1370935	305	-0.1498951	305	-0.13213	305	-0.09922827	305	-0.1419825
305.2	1.065362	305.2	1.002188	305.2	1.022324	305.2	1.051129	305.2	0.9951866	305.2	1.018259	305.2	1.040898	305.2	-0.1593633	305.2	-0.1500661	305.2	-0.2019639	305.2	-0.1535827	305.2	-0.1366912	305.2	-0.1498326	305.2	-0.1363047	305.2	-0.1017405	305.2	-0.1438078
305.4	1.070028	305.4	1.006481	305.4	1.023195	305.4	1.050246	305.4	0.9961373	305.4	1.018725	305.4	1.044044	305.4	-0.162355	305.4	-0.1451686	305.4	-0.2044234	305.4	-0.1598255	305.4	-0.1379455	305.4	-0.1449069	305.4	-0.136636	305.4	-0.1017937	305.4	-0.1403369
305.6	1.070872	305.6	1.000978	305.6	1.022859	305.6	1.051431	305.6	0.9933408	305.6	1.017528	305.6	1.038704	305.6	-0.1605546	305.6	-0.1446666	305.6	-0.209765	305.6	-0.153503	305.6	-0.1400274	305.6	-0.1487008	305.6	-0.1310553	305.6	-0.0990762	305.6	-0.1432734
305.8	1.06924	305.8	1.003106	305.8	1.026368	305.8	1.04657	305.8	0.9936913	305.8	1.015211	305.8	1.045281	305.8	-0.1597781	305.8	-0.1495488	305.8	-0.2024543	305.8	-0.1497938	305.8	-0.1419499	305.8	-0.1486676	305.8	-0.1316068	305.8	-0.09803213	305.8	-0.1398712
306	1.071536	306	1.004022	306	1.025256	306	1.055314	306	0.9964994	306	1.017342	306	1.047613	306	-0.1665049	306	-0.1422205	306	-0.1997522	306	-0.1554324	306	-0.139487	306	-0.1517748	306	-0.1344632	306	-0.09974425	306	-0.1419854
306.2	1.079113	306.2	1.007602	306.2	1.024351	306.2	1.05085	306.2	1.002273	306.2	1.021047	306.2	1.038685	306.2	-0.1601483	306.2	-0.1433951	306.2	-0.2012362	306.2	-0.1523903	306.2	-0.1364793	306.2	-0.1543908	306.2	-0.1329976	306.2	-0.09746506	306.2	-0.1419931
306.4	1.073633	306.4	1.005822	306.4	1.030383	306.4	1.05072	306.4	0.9978675	306.4	1.015848	306.4	1.043979	306.4	-0.1589201	306.4	-0.1443182	306.4	-0.202586	306.4	-0.1545986	306.4	-0.1421289	306.4	-0.1482559	306.4	-0.1335696	306.4	-0.09833564	306.4	-0.1444437
306.6	1.075766	306.6	1.011896	306.6	1.028437	306.6	1.050579	306.6	0.9963191	306.6	1.024454	306.6	1.043286	306.6	-0.1623323	306.6	-0.1442642	306.6	-0.2049399	306.6	-0.1526655	306.6	-0.1363275	306.6	-0.1480366	306.6	-0.1349487	306.6	-0.1004922	306.6	-0.1453044
306.8	1.076701	306.8	1.009241	306.8	1.028965	306.8	1.054343	306.8	0.996291	306.8	1.024036	306.8	1.043904	306.8	-0.1585754	306.8	-0.1462607	306.8	-0.1991987	306.8	-0.1511168	306.8	-0.1354415	306.8	-0.1493623	306.8	-0.1333925	306.8	-0.1038957	306.8	-0.1398539
307	1.080472	307	1.010354	307	1.028773	307	1.060849	307	1.003349	307	1.018016	307	1.04748	307	-0.1646004	307	-0.14288	307	-0.1995974	307	-0.1533686	307	-0.1354706	307	-0.1446666	307	-0.1354316	307	-0.1015795	307	-0.1409759
307.2	1.078175	307.2	1.010907	307.2	1.02711	307.2	1.053798	307.2	0.9976974	307.2	1.020821	307.2	1.044214	307.2	-0.1609864	307.2	-0.1493353	307.2	-0.2011096	307.2	-0.1567025	307.2	-0.1356675	307.2	-0.1513629	307.2	-0.1323309	307.2	-0.1038869	307.2	-0.1419052
307.4	1.081013	307.4	1.01128	307.4	1.02981	307.4	1.054909	307.4	1.000125	307.4	1.021992	307.4	1.045074	307.4	-0.1649345	307.4	-0.1432375	307.4	-0.2067577	307.4	-0.1519337	307.4	-0.1386296	307.4	-0.1476253	307.4	-0.1346456	307.4	-0.1018817	307.4	-0.1374562
307.6	1.083851	307.6	1.007973	307.6	1.033102	307.6	1.058276	307.6	1.000497	307.6	1.021301	307.6	1.042786	307.6	-0.1568791	307.6	-0.1453431	307.6	-0.2062859	307.6	-0.1539985	307.6	-0.1379267	307.6	-0.1455556	307.6	-0.137583	307.6	-0.1002026	307.6	-0.1406087
307.8	1.083922	307.8	1.016332	307.8	1.030019	307.8	1.051383	307.8	0.9989145	307.8	1.019448	307.8	1.044186	307.8	-0.1609575	307.8	-0.140872	307.8	-0.2002952	307.8	-0.1528279	307.8	-0.1371614	307.8	-0.1478328	307.8	-0.1316172	307.8	-0.1017912	307.8	-0.1431803
308	1.086656	308	1.012468	308	1.030346	308	1.055807	308	1.000097	308	1.021546	308	1.043614	308	-0.159371	308	-0.1461519	308	-0.2019548	308	-0.1510242	308	-0.1396692	308	-0.151181	308	-0.1349927	308	-0.09755985	308	-0.1419987
308.2	1.083878	308.2	1.014175	308.2	1.034076	308.2	1.059497	308.2	0.9976132	308.2	1.023077	308.2	1.045975	308.2	-0.1605941	308.2	-0.1394853	308.2	-0.2024407	308.2	-0.1512486	308.2	-0.1368623	308.2	-0.148552	308.2	-0.1343265	308.2	-0.09981138	308.2	-0.1382513
308.4	1.08533	308.4	1.013832	308.4	1.031403	308.4	1.059106	308.4	0.9979561	308.4	1.017716	308.4	1.040396	308.4	-0.1581675	308.4	-0.1434459	308.4	-0.2012741	308.4	-0.1534513	308.4	-0.1351677	308.4	-0.1495427	308.4	-0.1372773	308.4	-0.105414	308.4	-0.1412768
308.6	1.088636	308.6	1.012151	308.6	1.032251	308.6	1.057249	308.6	0.9971297	308.6	1.018094	308.6	1.042311	308.6	-0.1588626	308.6	-0.1487205	308.6	-0.1992871	308.6	-0.1535013	308.6	-0.136521	308.6	-0.1471832	308.6	-0.1284533	308.6	-0.09926716	308.6	-0.1389292
308.8	1.087402	308.8	1.017249	308.8	1.031024	308.8	1.058619	308.8	1.001137	308.8	1.022156	308.8	1.043448	308.8	-0.162253	308.8	-0.1440701	308.8	-0.2014227	308.8	-0.151651	308.8	-0.1329028	308.8	-0.1485849	308.8	-0.1340319	308.8	-0.1017386	308.8	-0.1356246
309	1.09203	309	1.018564	309	1.035556	309	1.060178	309	1.002685	309	1.017981	309	1.03867	309	-0.1627472	309	-0.1455533	309	-0.2013761	309	-0.1512545	309	-0.1364582	309	-0.1492609	309	-0.1308506	309	-0.09829662	309	-0.1433062
309.2	1.093183	309.2	1.024133	309.2	1.035707	309.2	1.056332	309.2	1.001634	309.2	1.021277	309.2	1.044775	309.2	-0.1596395	309.2	-0.1423408	309.2	-0.2009321	309.2	-0.1499003	309.2	-0.1364235	309.2	-0.1456338	309.2	-0.1340825	309.2	-0.09949671	309.2	-0.1427671
309.4	1.090081	309.4	1.018599	309.4	1.032815	309.4	1.056745	309.4	1.000361	309.4	1.021572	309.4	1.047234	309.4	-0.1563863	309.4	-0.1411747	309.4	-0.2014242	309.4	-0.1507254	309.4	-0.1382084	309.4	-0.1480433	309.4	-0.1293247	309.4	-0.103641	309.4	-0.1405026
309.6	1.093778	309.6	1.016153	309.6	1.036112	309.6	1.058063	309.6	0.9952382	309.6	1.024752	309.6	1.04287	309.6	-0.1610914	309.6	-0.1404961	309.6	-0.1976081	309.6	-0.1520479	309.6	-0.1364121	309.6	-0.1481288	309.6	-0.1317802	309.6	-0.09378604	309.6	-0.1375312
309.8	1.092283	309.8	1.01806	309.8	1.038193	309.8	1.057701	309.8	1.001342	309.8	1.024144	309.8	1.046517	309.8	-0.1612742	309.8	-0.1412003	309.8	-0.2006754	309.8	-0.1500984	309.8	-0.1330877	309.8	-0.143429	309.8	-0.1303665	309.8	-0.09885154	309.8	-0.1421497
310	1.092972	310	1.019844	310	1.034659	310	1.060668	310	0.9995385	310	1.021492	310	1.045297	310	-0.1630991	310	-0.1442146	310	-0.1968361	310	-0.1541096	310	-0.1386393	310	-0.1470372	310	-0.133443	310	-0.09742789	310	-0.143607
310.2	1.098482	310.2	1.020483	310.2	1.034471	310.2	1.061777	310.2	1.002816	310.2	1.021576	310.2	1.046369	310.2	-0.1618796	310.2	-0.1444219	310.2	-0.1979572	310.2	-0.1505886	310.2	-0.1313367	310.2	-0.1461853	310.2	-0.1278482	310.2	-0.09695088	310.2	-0.1413019
310.4	1.100803	310.4	1.018308	310.4	1.034536	310.4	1.062255	310.4	0.9990382	310.4	1.024442	310.4	1.05026	310.4	-0.1592161	310.4	-0.1389447	310.4	-0.2007719	310.4	-0.1494491	310.4	-0.1342433	310.4	-0.1468891	310.4	-0.1318737	310.4	-0.09691853	310.4	-0.1372762
310.6	1.098929	310.6	1.021669	310.6	1.0423	310.6	1.058704	310.6	0.9986898	310.6	1.023029	310.6	1.048571	310.6	-0.1611257	310.6	-0.1452766	310.6	-0.2032003	310.6	-0.1551139	310.6	-0.1325674	310.6	-0.1452997	310.6	-0.1284332	310.6	-0.09739675	310.6	-0.1398549
310.8	1.097631	310.8	1.02679	310.8	1.037298	310.8	1.057757	310.8	0.9992315	310.8	1.021454	310.8	1.042954	310.8	-0.1604895	310.8	-0.1423985	310.8	-0.1962942	310.8	-0.1482602	310.8	-0.1344192	310.8	-0.1485853	310.8	-0.132688	310.8	-0.0980017	310.8	-0.1370775
311	1.099249	311	1.023504	311	1.037709	311	1.062022	311	1.004174	311	1.023417	311	1.044008	311	-0.1627036	311	-0.1426147	311	-0.1970925	311	-0.149967	311	-0.1324019	311	-0.1456238	311	-0.1309689	311	-0.1015127	311	-0.140991
311.2	1.105022	311.2	1.025951	311.2	1.042313	311.2	1.060812	311.2	1.007978	311.2	1.024769	311.2	1.048987	311.2	-0.1625167	311.2	-0.1446308	311.2	-0.1986359	311.2	-0.1517355	311.2	-0.1316784	311.2	-0.1492682	311.2	-0.1309298	311.2	-0.09982014	311.2	-0.1402288
311.4	1.09835	311.4	1.027575	311.4	1.039716	311.4	1.057068	311.4	1.000483	311.4	1.023491	311.4	1.047193	311.4	-0.1621094	311.4	-0.1480896	311.4	-0.2015096	311.4	-0.1545975	311.4	-0.1341978	311.4	-0.1506041	311.4	-0.1289717	311.4	-0.1013665	311.4	-0.1350286
311.6	1.104333	311.6	1.021381	311.6	1.038521	311.6	1.061013	311.6	1.004518	311.6	1.023606	311.6	1.047154	311.6	-0.1623719	311.6	-0.1424905	311.6	-0.2023094	311.6	-0.1495533	311.6	-0.1353966	311.6	-0.1452034	311.6	-0.1273394	311.6	-0.101165	311.6	-0.1346718
[truncated: 16,591 more rows]
