# Supplementary material for: Functional development of a V3/glycan-specific broadly neutralizing antibody isolated from a case of HIV superinfection
Source: eLife journal article supplement (doi:10.7554/elife.68110), 2021-07-15
Supplement: fig2-data2 [file RawData0.xls]

A1		B1		C1		D1		E1		F1		G1		H1		A2		B2		C2		D2		E2		F2		G2		H2
0	0	0	0	0	0	0	0	0	0	0	0	0	0	0	0	0	0	0	0	0	0	0	0	0	0	0	0	0	0	0	0
0.2	-0.00099392	0.2	0.00506273	0.2	0.00348926	0.2	0.00195699	0.2	0.00179543	0.2	-0.00081528	0.2	0.00105439	0.2	0.00386603	0.2	0.00424191	0.2	0.00236146	0.2	0.00341409	0.2	-0.00004165	0.2	0.0021932	0.2	0.00096821	0.2	-0.00080522	0.2	0.00203797
0.4	0.00094675	0.4	0.00094975	0.4	0.00191634	0.4	0.00911218	0.4	0.00417883	0.4	0.00555933	0.4	0.00065515	0.4	0.00284485	0.4	0.00074298	0.4	0.00147674	0.4	0.001471	0.4	0.00179024	0.4	0.00269077	0.4	0.00107192	0.4	-0.00100536	0.4	0.00663183
0.6	-0.0004783	0.6	0.00279553	0.6	0.00225156	0.6	0.00505847	0.6	-0.0015927	0.6	0.00592458	0.6	0.00814679	0.6	0.00758927	0.6	0.00812468	0.6	0.00419578	0.6	0.00291552	0.6	0.00155001	0.6	-0.00102398	0.6	0.00303143	0.6	-0.00220567	0.6	0.00111793
0.8	0.00223083	0.8	0.00838545	0.8	0.00296886	0.8	0.00624706	0.8	0.00552366	0.8	0.0061411	0.8	0.00448415	0.8	0.00482375	0.8	0.0021387	0.8	0.00444265	0.8	0.00338865	0.8	0.00398507	0.8	0.00736304	0.8	0.00120027	0.8	-0.00064531	0.8	0.00823626
1	0.00197891	1	0.00439984	1	0.00624083	1	0.00624931	1	0.00660002	1	0.00867259	1	-0.00250874	1	0.00631679	1	0.0089431	1	0.00632684	1	0.00462579	1	0.00698556	1	0.0075731	1	0.00358697	1	0.00463257	1	0.00309958
1.2	0.00243128	1.2	0.00297382	1.2	0.0093333	1.2	0.00916036	1.2	0.00512728	1.2	0.00163633	1.2	0.00174699	1.2	0.00569781	1.2	0.01303325	1.2	0.00576859	1.2	-0.00042321	1.2	0.00471043	1.2	0.00440408	1.2	0.0022394	1.2	0.00098351	1.2	0.0068686
1.4	0.00304918	1.4	0.00339869	1.4	0.00775585	1.4	0.00678539	1.4	0.00634832	1.4	0.00722914	1.4	0.00089214	1.4	0.00380889	1.4	0.00957665	1.4	0.00837461	1.4	-0.00296978	1.4	0.00664526	1.4	0.00758912	1.4	0.00305937	1.4	-0.00078842	1.4	0.0042972
1.6	0.00793883	1.6	0.00023233	1.6	0.00774548	1.6	0.01136635	1.6	0.00400892	1.6	0.00892482	1.6	0.00540487	1.6	0.00415728	1.6	0.01198287	1.6	0.00661118	1.6	0.0038633	1.6	0.00515365	1.6	0.00497558	1.6	0.00384775	1.6	0.00153	1.6	0.00360824
1.8	0.00321325	1.8	0.00371487	1.8	0.00334472	1.8	0.00764673	1.8	0.00694166	1.8	0.00654913	1.8	0.00507838	1.8	0.00867559	1.8	0.01131094	1.8	0.01095658	1.8	0.00090731	1.8	0.00897303	1.8	0.00477678	1.8	0.00448642	1.8	0.00302357	1.8	0.00690748
2	0.00388279	2	0.00514441	2	0.00309374	2	0.0018435	2	0.00783544	2	0.00666729	2	0.00451362	2	0.01181457	2	0.00858564	2	0.00607726	2	0.00438905	2	0.00856311	2	0.00792403	2	0.00293335	2	0.00143847	2	0.00438123
2.2	0.00588942	2.2	0.00543575	2.2	0.00700073	2.2	0.01046013	2.2	0.00435628	2.2	0.00533513	2.2	0.00344527	2.2	0.01027652	2.2	0.00903553	2.2	0.00862019	2.2	0.00553377	2.2	0.00978598	2.2	0.01216314	2.2	0.00392875	2.2	-0.00369328	2.2	0.00464324
2.4	0.00514558	2.4	0.00446163	2.4	0.00852799	2.4	0.01010975	2.4	0.00277615	2.4	0.00808227	2.4	0.01061678	2.4	0.00771942	2.4	0.00600865	2.4	0.00884733	2.4	0.00559552	2.4	0.00387375	2.4	0.00809178	2.4	0.00588977	2.4	-0.00143465	2.4	0.00885721
2.6	0.00196352	2.6	0.00266738	2.6	0.01062405	2.6	0.00780719	2.6	0.00631219	2.6	0.00563466	2.6	0.00883897	2.6	0.0075637	2.6	0.00719984	2.6	0.01111572	2.6	0.00783815	2.6	0.00616695	2.6	0.00708636	2.6	0.00456284	2.6	0.0040437	2.6	0.00786223
2.8	0.0038793	2.8	0.009845	2.8	0.00727175	2.8	0.00901831	2.8	0.00420734	2.8	0.01288584	2.8	0.00471516	2.8	0.01011835	2.8	0.01369186	2.8	0.00720223	2.8	0.00559902	2.8	0.00745965	2.8	0.00860106	2.8	0.00333419	2.8	0.00204983	2.8	0.00677144
3	0.00486438	3	0.0041705	3	0.00655776	3	0.009123	3	0.00973873	3	0.01280484	3	0.00740468	3	0.00773414	3	0.01326902	3	0.00893587	3	0.00928101	3	0.00819383	3	0.01246121	3	0.00902229	3	0.00438956	3	0.00929605
3.2	0.00322507	3.2	0.00838387	3.2	0.00751333	3.2	0.00977878	3.2	0.0021425	3.2	0.00824127	3.2	0.00822838	3.2	0.00609118	3.2	0.01631681	3.2	0.01302225	3.2	0.00082443	3.2	0.00614782	3.2	0.00648784	3.2	0.00762789	3.2	0.00307653	3.2	0.0089141
3.4	0.00698902	3.4	0.00509961	3.4	0.00618345	3.4	0.00603139	3.4	0.00736859	3.4	0.01332353	3.4	0.00459939	3.4	0.00766615	3.4	0.01418925	3.4	0.00716996	3.4	0.00062286	3.4	0.00967179	3.4	0.00660412	3.4	0.00164404	3.4	-0.00002856	3.4	0.00805957
3.6	0.00179433	3.6	0.00490664	3.6	0.00853093	3.6	0.01280738	3.6	0.00704147	3.6	0.01573696	3.6	0.00474955	3.6	0.00508309	3.6	0.01022936	3.6	0.0155988	3.6	0.00815287	3.6	0.01177009	3.6	0.00485083	3.6	0.00360267	3.6	0.0052011	3.6	0.00899858
3.8	0.00530802	3.8	0.00489453	3.8	0.00463407	3.8	0.00979594	3.8	0.00292684	3.8	0.00826073	3.8	0.00565812	3.8	0.01023014	3.8	0.0170907	3.8	0.01082225	3.8	0.00902766	3.8	0.0116979	3.8	0.00971744	3.8	0.00819633	3.8	0.00758155	3.8	0.00844994
4	0.0012407	4	0.01033982	4	0.00966045	4	0.01197852	4	0.00185595	4	0.0096476	4	0.00640413	4	0.0076755	4	0.0115874	4	0.01072032	4	0.00569127	4	0.00842517	4	0.00890015	4	0.00336671	4	0.00774942	4	0.00633696
4.2	0.00707087	4.2	0.00607539	4.2	0.00656657	4.2	0.00693226	4.2	0.00725826	4.2	0.00865804	4.2	0.00478144	4.2	0.01148684	4.2	0.00913375	4.2	0.00890789	4.2	0.00818542	4.2	0.00945328	4.2	0.00910013	4.2	0.00451719	4.2	0.00553722	4.2	0.00889206
4.4	0.00669883	4.4	0.00382666	4.4	0.00729899	4.4	0.00778157	4.4	0.0043379	4.4	0.00864197	4.4	0.00954138	4.4	0.00777455	4.4	0.01173582	4.4	0.01223812	4.4	0.00525044	4.4	0.00792753	4.4	0.00810327	4.4	0.00398554	4.4	0.00657736	4.4	0.00542538
4.6	0.00609009	4.6	0.00743387	4.6	0.00926525	4.6	0.010158	4.6	0.01200597	4.6	0.01060522	4.6	0.00958801	4.6	0.00715436	4.6	0.01297669	4.6	0.01010009	4.6	0.00643957	4.6	0.01012199	4.6	0.00800009	4.6	0.00919059	4.6	0.00340377	4.6	0.00897087
4.8	0.0034743	4.8	0.00458764	4.8	0.00864976	4.8	0.0098698	4.8	0.00506739	4.8	0.01229296	4.8	0.00526495	4.8	0.00881365	4.8	0.01342851	4.8	0.011395	4.8	0.00815291	4.8	0.00912801	4.8	0.00957194	4.8	0.00853669	4.8	0.00457621	4.8	0.00813048
5	0.00890223	5	0.00422257	5	0.00998227	5	0.00997182	5	0.00407597	5	0.01329324	5	0.00654061	5	0.0041537	5	0.01633691	5	0.0052395	5	0.00792297	5	0.00902334	5	0.00296952	5	0.0064999	5	0.0005832	5	0.00714107
5.2	0.00378254	5.2	0.0052498	5.2	0.00785329	5.2	0.01235505	5.2	0.00756083	5.2	0.01010638	5.2	0.00624807	5.2	0.01397072	5.2	0.01186208	5.2	0.00956945	5.2	0.00674436	5.2	0.01024218	5.2	0.00951119	5.2	0.00726889	5.2	0.00201641	5.2	0.00911385
5.4	0.00697626	5.4	0.00605211	5.4	0.01074466	5.4	0.00996921	5.4	0.00404868	5.4	0.01415896	5.4	0.00359156	5.4	0.00848091	5.4	0.01079134	5.4	0.00955321	5.4	0.00671728	5.4	0.01201861	5.4	0.00742464	5.4	0.0086774	5.4	0.00180529	5.4	0.01126595
5.6	0.00569518	5.6	0.00489136	5.6	0.00634371	5.6	0.01192965	5.6	0.00522997	5.6	0.00884834	5.6	0.0101148	5.6	0.00578581	5.6	0.01058158	5.6	0.00912893	5.6	0.0062916	5.6	0.00952746	5.6	0.00766429	5.6	0.00628096	5.6	0.004038	5.6	0.00754659
5.8	0.00683736	5.8	0.00699885	5.8	0.01074515	5.8	0.01574861	5.8	0.00475617	5.8	0.01410773	5.8	0.00519157	5.8	0.00528019	5.8	0.01336038	5.8	0.01079585	5.8	0.00409952	5.8	0.01079379	5.8	0.00748857	5.8	0.00673108	5.8	-0.00195116	5.8	0.00881591
6	0.00272092	6	0.00704698	6	0.00774318	6	0.00982759	6	0.00606643	6	0.01036653	6	0.00577391	6	0.0071078	6	0.00906721	6	0.01060933	6	0.00800628	6	0.01192716	6	0.01034744	6	0.00572433	6	0.00754727	6	0.00634449
6.2	0.00317199	6.2	0.00421603	6.2	0.00732926	6.2	0.01339253	6.2	0.00688963	6.2	0.01186912	6.2	0.00885121	6.2	0.01169222	6.2	0.01056734	6.2	0.01363222	6.2	0.00630733	6.2	0.01369645	6.2	0.00999988	6.2	0.00617693	6.2	0.00255713	6.2	0.0079318
6.4	0.00497028	6.4	0.00291629	6.4	0.01273337	6.4	0.01635588	6.4	0.00939923	6.4	0.01244359	6.4	0.00662226	6.4	0.01349464	6.4	0.01892317	6.4	0.00969316	6.4	0.0088551	6.4	0.01232337	6.4	0.01109072	6.4	0.00661871	6.4	0.00761141	6.4	0.0106931
6.6	0.00930742	6.6	0.00273762	6.6	0.00863965	6.6	0.01041625	6.6	0.00995003	6.6	0.01269538	6.6	0.00787202	6.6	0.00768158	6.6	0.01317588	6.6	0.01043558	6.6	0.00654198	6.6	0.01095545	6.6	0.01090598	6.6	0.00639904	6.6	0.00361115	6.6	0.00497012
6.8	0.00451945	6.8	0.00877685	6.8	0.00911355	6.8	0.0158269	6.8	0.00510586	6.8	0.00855402	6.8	0.00656167	6.8	0.01112593	6.8	0.01536696	6.8	0.0086077	6.8	0.0084103	6.8	0.01285198	6.8	0.01357308	6.8	0.0024328	6.8	0.00628707	6.8	0.00524303
7	0.00635445	7	0.00457601	7	0.01023667	7	0.01136213	7	0.00459064	7	0.01051282	7	0.00525664	7	0.01231051	7	0.0128458	7	0.01268366	7	0.00824561	7	0.01157109	7	0.00744127	7	0.00519713	7	0.00493669	7	0.00543073
7.2	0.00595832	7.2	0.00315456	7.2	0.01015951	7.2	0.01334434	7.2	0.00500055	7.2	0.01085688	7.2	0.00666348	7.2	0.01180889	7.2	0.01678743	7.2	0.00891979	7.2	0.00484899	7.2	0.01057442	7.2	0.00799696	7.2	0.00584811	7.2	0.00349505	7.2	0.00807844
7.4	0.00855708	7.4	0.00893882	7.4	0.00892395	7.4	0.01540732	7.4	0.00719337	7.4	0.01030105	7.4	0.0092564	7.4	0.00823545	7.4	0.01259016	7.4	0.00865391	7.4	0.00817602	7.4	0.01339549	7.4	0.00847128	7.4	0.00848226	7.4	0.00495227	7.4	0.00750446
7.6	0.00361169	7.6	0.00994677	7.6	0.01279948	7.6	0.00883116	7.6	0.00794685	7.6	0.0093526	7.6	0.00617863	7.6	0.01062486	7.6	0.01338848	7.6	0.01214382	7.6	0.00699482	7.6	0.01200211	7.6	0.00880729	7.6	0.00714565	7.6	0.00101121	7.6	0.00826885
7.8	0.00353636	7.8	0.00527931	7.8	0.00853286	7.8	0.01214853	7.8	0.00271079	7.8	0.01129006	7.8	0.00548992	7.8	0.01295456	7.8	0.01210143	7.8	0.01499028	7.8	0.00653691	7.8	0.01101722	7.8	0.00809748	7.8	0.00817921	7.8	0.00233438	7.8	0.00602347
8	0.00751297	8	0.0047833	8	0.00506395	8	0.01202731	8	0.01256087	8	0.01135158	8	0.01025499	8	0.01129563	8	0.01042561	8	0.01230012	8	0.00864073	8	0.00704293	8	0.01247101	8	0.00828581	8	0.0039344	8	0.00653399
8.2	0.01232948	8.2	0.00935058	8.2	0.00688335	8.2	0.01532537	8.2	0.00618621	8.2	0.0126864	8.2	0.01178261	8.2	0.0115928	8.2	0.01400601	8.2	0.01463593	8.2	0.00513078	8.2	0.01168457	8.2	0.00685661	8.2	0.00705296	8.2	0.00119644	8.2	0.00519551
8.4	0.00740848	8.4	0.00366721	8.4	0.00822364	8.4	0.01210149	8.4	0.00366466	8.4	0.01227853	8.4	0.00491833	8.4	0.00947367	8.4	0.01039515	8.4	0.01179808	8.4	0.00332008	8.4	0.01394654	8.4	0.00866791	8.4	0.006076	8.4	0.00452727	8.4	0.01078109
8.6	0.00550424	8.6	0.00873319	8.6	0.01219769	8.6	0.01629804	8.6	0.00958862	8.6	0.01135366	8.6	0.01047464	8.6	0.00670493	8.6	0.01257066	8.6	0.00885031	8.6	0.00918049	8.6	0.01028899	8.6	0.01094873	8.6	0.00619376	8.6	0.00828493	8.6	0.01378602
8.8	0.00601888	8.8	0.00515892	8.8	0.01105088	8.8	0.01377492	8.8	0.00647334	8.8	0.0125392	8.8	0.00897433	8.8	0.00663394	8.8	0.01556118	8.8	0.01105778	8.8	0.00602798	8.8	0.01239977	8.8	0.01198551	8.8	0.00862008	8.8	0.0074278	8.8	0.00708051
9	0.00349308	9	0.01015893	9	0.00847555	9	0.01216782	9	0.0061329	9	0.0133657	9	0.01459718	9	0.01010951	9	0.01505674	9	0.01542713	9	0.00573019	9	0.00677558	9	0.00884592	9	0.00886906	9	0.00525446	9	0.01044824
9.2	0.00949713	9.2	0.00798254	9.2	0.00903484	9.2	0.01310261	9.2	0.00515738	9.2	0.01218741	9.2	0.01001258	9.2	0.01478945	9.2	0.01073672	9.2	0.013533	9.2	0.010827	9.2	0.00491803	9.2	0.01030935	9.2	0.00630182	9.2	0.00353172	9.2	0.00650634
9.4	0.0049697	9.4	0.00996668	9.4	0.01272821	9.4	0.01560045	9.4	0.00448322	9.4	0.01576794	9.4	0.01227248	9.4	0.00815886	9.4	0.01825366	9.4	0.01022915	9.4	0.00835293	9.4	0.00972263	9.4	0.01076387	9.4	0.00963578	9.4	0.001652	9.4	0.01479454
9.6	0.00675165	9.6	0.00787502	9.6	0.00851529	9.6	0.01417063	9.6	0.01082297	9.6	0.01659928	9.6	0.00861716	9.6	0.01236244	9.6	0.01042538	9.6	0.01547819	9.6	0.00516796	9.6	0.01055514	9.6	0.00995007	9.6	0.00972413	9.6	0.00252626	9.6	0.01099887
9.8	0.00271152	9.8	0.00522534	9.8	0.01577712	9.8	0.01376019	9.8	0.00839912	9.8	0.01462219	9.8	0.00896644	9.8	0.01148198	9.8	0.0208342	9.8	0.01112784	9.8	0.00655026	9.8	0.00747983	9.8	0.01229384	9.8	0.00888901	9.8	0.00137003	9.8	0.01113095
10	0.00589336	10	0.00558109	10	0.01157395	10	0.01346973	10	0.01083569	10	0.00893326	10	0.01081956	10	0.01261855	10	0.01497981	10	0.01183536	10	0.00694657	10	0.01346737	10	0.01262725	10	0.00307583	10	0.00047658	10	0.00866375
10.2	0.00623142	10.2	0.01019792	10.2	0.01028007	10.2	0.01946777	10.2	0.00660335	10.2	0.01040071	10.2	0.00948023	10.2	0.01363794	10.2	0.01609517	10.2	0.00998773	10.2	0.00542857	10.2	0.01139049	10.2	0.01322766	10.2	0.01186626	10.2	0.00170534	10.2	0.00959483
10.4	0.00814573	10.4	0.00816937	10.4	0.01185235	10.4	0.01487771	10.4	0.00549647	10.4	0.01052106	10.4	0.01045329	10.4	0.01121134	10.4	0.01417103	10.4	0.01154416	10.4	0.00910037	10.4	0.01412717	10.4	0.01096364	10.4	0.00877654	10.4	0.00350408	10.4	0.01050447
10.6	0.00655201	10.6	0.00699034	10.6	0.01244028	10.6	0.01258016	10.6	0.00536792	10.6	0.01504816	10.6	0.01066768	10.6	0.00992168	10.6	0.01352294	10.6	0.01255995	10.6	0.00121157	10.6	0.01092418	10.6	0.00795024	10.6	0.00645772	10.6	0.00398531	10.6	0.01297676
10.8	0.00304521	10.8	0.00598843	10.8	0.01270848	10.8	0.01645944	10.8	0.01247045	10.8	0.01310524	10.8	0.00905202	10.8	0.01505336	10.8	0.01534968	10.8	0.01043472	10.8	0.00781191	10.8	0.01032364	10.8	0.00940816	10.8	0.00863659	10.8	0.00408877	10.8	0.00331145
11	0.00689132	11	0.00709507	11	0.00672397	11	0.01338978	11	0.00662169	11	0.01464048	11	0.00759071	11	0.01477113	11	0.01376722	11	0.01073303	11	0.00436485	11	0.01470655	11	0.01149586	11	0.00921659	11	0.0054611	11	0.01201754
11.2	0.01000473	11.2	0.0048705	11.2	0.01326677	11.2	0.01214128	11.2	0.00836697	11.2	0.00916584	11.2	0.01116838	11.2	0.01388661	11.2	0.01581175	11.2	0.00922023	11.2	0.00881815	11.2	0.0106096	11.2	0.01053322	11.2	0.00900094	11.2	0.00560454	11.2	0.00930694
11.4	0.00108742	11.4	0.0053335	11.4	0.01069711	11.4	0.01220256	11.4	0.00941343	11.4	0.01046077	11.4	0.01189337	11.4	0.01087024	11.4	0.01568954	11.4	0.01690075	11.4	0.00528738	11.4	0.01189348	11.4	0.0107055	11.4	0.00527082	11.4	0.00563561	11.4	0.01185253
11.6	0.00765631	11.6	0.00839815	11.6	0.0121838	11.6	0.02052733	11.6	0.00840323	11.6	0.01006735	11.6	0.00880368	11.6	0.00763034	11.6	0.01696448	11.6	0.01213618	11.6	0.00930526	11.6	0.01373926	11.6	0.01141737	11.6	0.00465386	11.6	0.00249127	11.6	0.01122652
11.8	0.00584235	11.8	0.0117042	11.8	0.0110175	11.8	0.01686244	11.8	0.01000747	11.8	0.01267315	11.8	0.01162725	11.8	0.01448581	11.8	0.01638063	11.8	0.01112883	11.8	0.0016226	11.8	0.01373184	11.8	0.01309596	11.8	0.0103203	11.8	0.00844435	11.8	0.00715254
12	0.00735451	12	0.00759961	12	0.00977407	12	0.01894587	12	0.01151264	12	0.01016289	12	0.00935823	12	0.0123058	12	0.01779637	12	0.01185739	12	0.0084928	12	0.01035524	12	0.01210824	12	0.00779892	12	0.0046651	12	0.01164799
12.2	0.00873128	12.2	0.00915076	12.2	0.00994418	12.2	0.01831358	12.2	0.01296052	12.2	0.01377465	12.2	0.01228411	12.2	0.00662062	12.2	0.01386346	12.2	0.01176135	12.2	0.0111244	12.2	0.01760823	12.2	0.00631104	12.2	0.00651338	12.2	0.00445512	12.2	0.0075647
12.4	0.00694529	12.4	0.00505082	12.4	0.01401068	12.4	0.01894351	12.4	0.00674824	12.4	0.01670313	12.4	0.01010217	12.4	0.01587838	12.4	0.01282496	12.4	0.01342303	12.4	0.00778261	12.4	0.01198883	12.4	0.01281557	12.4	0.01072347	12.4	0.00730455	12.4	0.00934109
12.6	0.00642796	12.6	0.00620144	12.6	0.01036989	12.6	0.01416801	12.6	0.00880592	12.6	0.01236856	12.6	0.00628303	12.6	0.0157277	12.6	0.01315605	12.6	0.01667772	12.6	0.00902634	12.6	0.00736157	12.6	0.01263533	12.6	0.00945693	12.6	0.0035057	12.6	0.0092609
12.8	0.00944445	12.8	0.00549032	12.8	0.01262047	12.8	0.01678052	12.8	0.01065425	12.8	0.01413878	12.8	0.00812908	12.8	0.01370283	12.8	0.0165365	12.8	0.01154261	12.8	0.00627552	12.8	0.01580336	12.8	0.01270203	12.8	0.00787761	12.8	0.00500054	12.8	0.00982763
13	0.005095	13	0.00761331	13	0.01318061	13	0.01430095	13	0.01047268	13	0.01715895	13	0.00981237	13	0.01199486	13	0.0169334	13	0.01098718	13	0.00502388	13	0.00839143	13	0.00685763	13	0.00811461	13	0.00171348	13	0.01371394
13.2	0.01270896	13.2	0.01035204	13.2	0.00758833	13.2	0.01285967	13.2	0.01152699	13.2	0.01398006	13.2	0.01127224	13.2	0.01454688	13.2	0.01523062	13.2	0.01296012	13.2	0.00930831	13.2	0.01239066	13.2	0.0115352	13.2	0.00647352	13.2	0.00404484	13.2	0.01034626
13.4	0.00647526	13.4	0.01100238	13.4	0.00934314	13.4	0.01518758	13.4	0.01023481	13.4	0.01123476	13.4	0.01457787	13.4	0.01139813	13.4	0.01171608	13.4	0.0147571	13.4	0.00746424	13.4	0.01409775	13.4	0.00944858	13.4	0.00775564	13.4	0.0029821	13.4	0.007442
13.6	0.00703496	13.6	0.00961752	13.6	0.01046579	13.6	0.01719553	13.6	0.00663316	13.6	0.0147414	13.6	0.0123151	13.6	0.01047245	13.6	0.01761801	13.6	0.01709665	13.6	0.00957642	13.6	0.01627468	13.6	0.01380781	13.6	0.00852469	13.6	0.00229117	13.6	0.00970665
13.8	0.00471964	13.8	0.00944632	13.8	0.01258345	13.8	0.02026476	13.8	0.0062458	13.8	0.01448875	13.8	0.00289554	13.8	0.01225139	13.8	0.01735644	13.8	0.01408007	13.8	0.00833757	13.8	0.01457556	13.8	0.00962398	13.8	0.00834262	13.8	0.00369101	13.8	0.01356128
14	0.00487713	14	0.00895768	14	0.0151403	14	0.01598279	14	0.00718476	14	0.01714098	14	0.01462289	14	0.01331249	14	0.01370282	14	0.01342464	14	0.00689428	14	0.01010939	14	0.01010542	14	0.00597539	14	0.0027198	14	0.00996884
14.2	0.00865365	14.2	0.01128369	14.2	0.01610506	14.2	0.01385249	14.2	0.00601942	14.2	0.0118782	14.2	0.01148958	14.2	0.01312575	14.2	0.01774224	14.2	0.01545211	14.2	0.00983144	14.2	0.01071304	14.2	0.0143624	14.2	0.00855375	14.2	0.00584553	14.2	0.01132044
14.4	0.00620814	14.4	0.00751812	14.4	0.01141443	14.4	0.01843026	14.4	0.01071275	14.4	0.01066954	14.4	0.0100915	14.4	0.0149634	14.4	0.0153836	14.4	0.01898232	14.4	0.00591772	14.4	0.01199902	14.4	0.01295999	14.4	0.00840493	14.4	0.00186502	14.4	0.01025869
14.6	0.00371261	14.6	0.01033714	14.6	0.0110722	14.6	0.01457994	14.6	0.00873278	14.6	0.01256338	14.6	0.01084194	14.6	0.01187658	14.6	0.01879275	14.6	0.01146794	14.6	0.00750285	14.6	0.01212256	14.6	0.01702198	14.6	0.00769259	14.6	0.00421403	14.6	0.01120396
14.8	0.00605577	14.8	0.00843164	14.8	0.01289699	14.8	0.01501292	14.8	0.00953592	14.8	0.01629954	14.8	0.00991081	14.8	0.01084982	14.8	0.01639836	14.8	0.01266346	14.8	0.01000824	14.8	0.01517076	14.8	0.00944526	14.8	0.00619807	14.8	0.00455443	14.8	0.01329314
15	0.00953608	15	0.00709835	15	0.01231581	15	0.01729864	15	0.00992901	15	0.01668687	15	0.01538199	15	0.01475046	15	0.01849282	15	0.01489082	15	0.01063938	15	0.015006	15	0.00933815	15	0.01191369	15	0.00248023	15	0.00930507
15.2	0.00978634	15.2	0.01246012	15.2	0.01262058	15.2	0.01948894	15.2	0.00989445	15.2	0.01755182	15.2	0.01785702	15.2	0.01444731	15.2	0.01846994	15.2	0.01160359	15.2	0.00752118	15.2	0.01317769	15.2	0.01511521	15.2	0.01121605	15.2	0.00866216	15.2	0.01055635
15.4	0.00599129	15.4	0.00376604	15.4	0.01357226	15.4	0.01370964	15.4	0.00974038	15.4	0.01228372	15.4	0.01487703	15.4	0.01242581	15.4	0.01114737	15.4	0.01210933	15.4	0.00615425	15.4	0.01361026	15.4	0.00964726	15.4	0.01366533	15.4	-0.00024764	15.4	0.00726786
15.6	0.00427724	15.6	0.01154788	15.6	0.01137971	15.6	0.01592669	15.6	0.00885508	15.6	0.01219147	15.6	0.00795425	15.6	0.01497058	15.6	0.01761736	15.6	0.01206684	15.6	0.00769565	15.6	0.01514746	15.6	0.01314074	15.6	0.00894448	15.6	0.00423014	15.6	0.01399505
15.8	0.00849299	15.8	0.01107453	15.8	0.00899774	15.8	0.01557572	15.8	0.00897521	15.8	0.01134278	15.8	0.00958457	15.8	0.01566177	15.8	0.01934872	15.8	0.01609866	15.8	0.00930957	15.8	0.01287804	15.8	0.01195247	15.8	0.0100267	15.8	0.00458813	15.8	0.01407815
16	0.00508922	16	0.01104367	16	0.01339278	16	0.01477532	16	0.00989563	16	0.01694282	16	0.01173279	16	0.01509245	16	0.01163728	16	0.01169064	16	0.00981016	16	0.01233083	16	0.00824581	16	0.00951648	16	0.00626406	16	0.01041947
16.2	0.00830663	16.2	0.01112481	16.2	0.01118858	16.2	0.0206767	16.2	0.01044298	16.2	0.01762781	16.2	0.01222557	16.2	0.01415082	16.2	0.01400878	16.2	0.01480575	16.2	0.00968004	16.2	0.01234533	16.2	0.01123951	16.2	0.00753747	16.2	0.00410757	16.2	0.00976445
16.4	0.0093782	16.4	0.0128296	16.4	0.00789565	16.4	0.01486292	16.4	0.01220819	16.4	0.01889558	16.4	0.01460999	16.4	0.01382972	16.4	0.01562827	16.4	0.00833804	16.4	0.00828351	16.4	0.01594371	16.4	0.01336862	16.4	0.01137052	16.4	0.00691321	16.4	0.00845743
16.6	0.00962014	16.6	0.00617938	16.6	0.01058829	16.6	0.01636141	16.6	0.01175948	16.6	0.01486805	16.6	0.01395752	16.6	0.01608795	16.6	0.01796066	16.6	0.01314195	16.6	0.00945947	16.6	0.01486112	16.6	0.01492831	16.6	0.01304503	16.6	0.00405365	16.6	0.00742117
16.8	0.00488841	16.8	0.00750032	16.8	0.01153465	16.8	0.01833819	16.8	0.01369232	16.8	0.01690077	16.8	0.01286877	16.8	0.01383603	16.8	0.01664253	16.8	0.0100763	16.8	0.01302475	16.8	0.01366435	16.8	0.01391701	16.8	0.01013853	16.8	0.00464301	16.8	0.00921503
17	0.01292772	17	0.0076114	17	0.01153304	17	0.0216752	17	0.01379617	17	0.01051369	17	0.01419219	17	0.01039168	17	0.01473583	17	0.01608526	17	0.0048325	17	0.01230659	17	0.01157983	17	0.01175605	17	0.00752287	17	0.00973665
17.2	0.01162391	17.2	0.00749044	17.2	0.01238039	17.2	0.0187404	17.2	0.01298326	17.2	0.01551703	17.2	0.01547534	17.2	0.0124586	17.2	0.01347713	17.2	0.01518488	17.2	0.00725237	17.2	0.01710618	17.2	0.01314436	17.2	0.00866002	17.2	0.006578	17.2	0.00764728
17.4	0.01184519	17.4	0.00567481	17.4	0.01281357	17.4	0.02098545	17.4	0.00571431	17.4	0.01469274	17.4	0.01207354	17.4	0.01655579	17.4	0.01836388	17.4	0.01193307	17.4	0.01085071	17.4	0.02091621	17.4	0.00584367	17.4	0.00999651	17.4	0.00055543	17.4	0.01113363
17.6	0.00871101	17.6	0.00760536	17.6	0.01254813	17.6	0.01875874	17.6	0.008713	17.6	0.01655542	17.6	0.01018738	17.6	0.01563773	17.6	0.01341303	17.6	0.01348498	17.6	0.00507553	17.6	0.01689063	17.6	0.01486785	17.6	0.00850787	17.6	0.00204622	17.6	0.00857268
17.8	0.00948955	17.8	0.00575587	17.8	0.01290516	17.8	0.01856346	17.8	0.0101244	17.8	0.01280132	17.8	0.01482632	17.8	0.01449292	17.8	0.01678946	17.8	0.01164207	17.8	0.00496054	17.8	0.01465345	17.8	0.01253876	17.8	0.00890073	17.8	0.00323011	17.8	0.01040321
18	0.01067153	18	0.00970374	18	0.00866543	18	0.02087617	18	0.01024331	18	0.01427675	18	0.00948566	18	0.011835	18	0.0190553	18	0.01302058	18	0.01174126	18	0.01653404	18	0.01354468	18	0.01169857	18	0.00825134	18	0.00969471
18.2	0.01013621	18.2	0.00858112	18.2	0.009788	18.2	0.01548576	18.2	0.0064706	18.2	0.01379092	18.2	0.01110951	18.2	0.01261488	18.2	0.0162056	18.2	0.00810766	18.2	0.00890139	18.2	0.01415349	18.2	0.01041211	18.2	0.00769384	18.2	0.0005118	18.2	0.00974801
18.4	0.00660373	18.4	0.01235055	18.4	0.01338846	18.4	0.01585878	18.4	0.01103079	18.4	0.0169835	18.4	0.01505291	18.4	0.01305909	18.4	0.01938798	18.4	0.01585917	18.4	0.00530827	18.4	0.01438836	18.4	0.01286478	18.4	0.01198649	18.4	0.00831297	18.4	0.00985848
18.6	0.00728863	18.6	0.01080192	18.6	0.01308147	18.6	0.02171264	18.6	0.00746273	18.6	0.01431259	18.6	0.01082674	18.6	0.01309857	18.6	0.01333229	18.6	0.01805401	18.6	0.00714637	18.6	0.0129917	18.6	0.00984294	18.6	0.01308729	18.6	0.00738104	18.6	0.01218381
18.8	0.01236678	18.8	0.00870233	18.8	0.01282424	18.8	0.01938559	18.8	0.00467391	18.8	0.01544294	18.8	0.01114717	18.8	0.01145328	18.8	0.01875223	18.8	0.01421806	18.8	0.00731945	18.8	0.01266347	18.8	0.01557153	18.8	0.00970866	18.8	0.00286304	18.8	0.00614175
19	0.01064793	19	0.0092422	19	0.01528261	19	0.02160564	19	0.00818783	19	0.01978916	19	0.0135233	19	0.01566012	19	0.02078822	19	0.01596118	19	0.00884908	19	0.01164864	19	0.01286678	19	0.00866214	19	0.00812193	19	0.00465884
19.2	0.00746802	19.2	0.00759018	19.2	0.01261287	19.2	0.02094053	19.2	0.00862077	19.2	0.0186009	19.2	0.01153845	19.2	0.01691998	19.2	0.01511714	19.2	0.01095667	19.2	0.00700723	19.2	0.01067642	19.2	0.01168931	19.2	0.01274408	19.2	0.00465595	19.2	0.01100085
19.4	0.01285692	19.4	0.01249503	19.4	0.01608975	19.4	0.01965568	19.4	0.00701444	19.4	0.01592567	19.4	0.01533759	19.4	0.0132746	19.4	0.0153852	19.4	0.01639133	19.4	0.00763633	19.4	0.01195205	19.4	0.01271604	19.4	0.00923083	19.4	0.00396567	19.4	0.00920435
19.6	0.01191544	19.6	0.00771561	19.6	0.00867363	19.6	0.02105264	19.6	0.00933239	19.6	0.01591789	19.6	0.01453395	19.6	0.01317856	19.6	0.01858383	19.6	0.01763838	19.6	0.01162885	19.6	0.01395551	19.6	0.01474681	19.6	0.01066699	19.6	0.00617082	19.6	0.00735317
19.8	0.00646714	19.8	0.00543766	19.8	0.0073413	19.8	0.02338041	19.8	0.00962303	19.8	0.0176101	19.8	0.01403266	19.8	0.01547019	19.8	0.02030661	19.8	0.01829	19.8	0.01124215	19.8	0.01555331	19.8	0.01442332	19.8	0.00822349	19.8	0.00703823	19.8	0.01239566
20	0.00577084	20	0.0086446	20	0.01423535	20	0.02019576	20	0.00981113	20	0.01752891	20	0.01258261	20	0.01953082	20	0.0179033	20	0.01629315	20	0.00775605	20	0.01440216	20	0.0140218	20	0.01078871	20	0.0098265	20	0.00931262
20.2	0.00839229	20.2	0.01126509	20.2	0.01854475	20.2	0.02118149	20.2	0.00947164	20.2	0.01803241	20.2	0.01221019	20.2	0.01935019	20.2	0.02139794	20.2	0.01519001	20.2	0.0082903	20.2	0.01292043	20.2	0.01320183	20.2	0.0111324	20.2	0.00198644	20.2	0.00956251
20.4	0.00571882	20.4	0.01146455	20.4	0.01463564	20.4	0.02342621	20.4	0.01083567	20.4	0.01618352	20.4	0.01049155	20.4	0.01574264	20.4	0.0189693	20.4	0.01428793	20.4	0.00459792	20.4	0.01554754	20.4	0.00713051	20.4	0.01203733	20.4	0.0074519	20.4	0.00944091
20.6	0.00824998	20.6	0.01114942	20.6	0.01375846	20.6	0.01996646	20.6	0.0054568	20.6	0.01416538	20.6	0.01050555	20.6	0.01465649	20.6	0.01787014	20.6	0.01582072	20.6	0.01047772	20.6	0.01496437	20.6	0.01021386	20.6	0.01014214	20.6	0.00757777	20.6	0.01031456
20.8	0.00836388	20.8	0.00759587	20.8	0.01256956	20.8	0.01963528	20.8	0.00767741	20.8	0.01586784	20.8	0.01342575	20.8	0.01856174	20.8	0.01836878	20.8	0.01592371	20.8	0.00894967	20.8	0.00731715	20.8	0.0142936	20.8	0.01279099	20.8	0.00585792	20.8	0.00793598
21	0.01437664	21	0.00529131	21	0.01339289	21	0.02108287	21	0.0095161	21	0.01567445	21	0.01473108	21	0.01590477	21	0.01743147	21	0.01433624	21	0.00976516	21	0.01106376	21	0.01173981	21	0.01090543	21	0.00280964	21	0.01078718
21.2	0.00869709	21.2	0.01062683	21.2	0.01162576	21.2	0.02410084	21.2	0.01150872	21.2	0.01700499	21.2	0.01749452	21.2	0.01283709	21.2	0.01255271	21.2	0.01572216	21.2	0.01601032	21.2	0.01331479	21.2	0.01354957	21.2	0.01077282	21.2	0.00824026	21.2	0.01803412
21.4	0.00567896	21.4	0.00525791	21.4	0.01509393	21.4	0.01985976	21.4	0.00718026	21.4	0.01620646	21.4	0.01661366	21.4	0.01416327	21.4	0.01385044	21.4	0.01150637	21.4	0.005711	21.4	0.0145168	21.4	0.01299412	21.4	0.00721401	21.4	0.00874801	21.4	0.007937
21.6	0.00678017	21.6	0.0092991	21.6	0.01327842	21.6	0.01748146	21.6	0.01118849	21.6	0.01240132	21.6	0.01474853	21.6	0.01976165	21.6	0.02087693	21.6	0.01194546	21.6	0.01156037	21.6	0.0176105	21.6	0.01028624	21.6	0.00727626	21.6	0.00506906	21.6	0.00657009
21.8	0.01291106	21.8	0.01139872	21.8	0.01030691	21.8	0.02145835	21.8	0.01034692	21.8	0.01285403	21.8	0.01608908	21.8	0.01424115	21.8	0.01340545	21.8	0.01676358	21.8	0.00743888	21.8	0.0134699	21.8	0.01501384	21.8	0.00983531	21.8	0.00454114	21.8	0.0087508
22	0.01307128	22	0.00831011	22	0.01795153	22	0.02152985	22	0.00767522	22	0.01420493	22	0.01385902	22	0.01556427	22	0.01367901	22	0.01780967	22	0.00475338	22	0.01426078	22	0.01204129	22	0.01317937	22	0.00526267	22	0.01160409
22.2	0.01037412	22.2	0.00752372	22.2	0.01551153	22.2	0.02313644	22.2	0.01002223	22.2	0.01405911	22.2	0.01234173	22.2	0.01220031	22.2	0.01480671	22.2	0.01377569	22.2	0.01008286	22.2	0.01553021	22.2	0.01644404	22.2	0.01054726	22.2	0.00237741	22.2	0.01023235
22.4	0.00870789	22.4	0.00960315	22.4	0.01354384	22.4	0.02420777	22.4	0.01257598	22.4	0.01845174	22.4	0.01637592	22.4	0.01660679	22.4	0.01537169	22.4	0.01693262	22.4	0.00687717	22.4	0.01542898	22.4	0.0117706	22.4	0.00529835	22.4	0.00830515	22.4	0.01095044
22.6	0.00846802	22.6	0.01182787	22.6	0.01315529	22.6	0.01792116	22.6	0.0107714	22.6	0.0159703	22.6	0.02153897	22.6	0.01041129	22.6	0.01716061	22.6	0.01600624	22.6	0.00875981	22.6	0.01611895	22.6	0.0149946	22.6	0.01395665	22.6	0.00785223	22.6	0.01130722
22.8	0.00837589	22.8	0.01026146	22.8	0.01057714	22.8	0.01891585	22.8	0.01192799	22.8	0.01573307	22.8	0.01573511	22.8	0.01894976	22.8	0.01990594	22.8	0.01432301	22.8	0.00877327	22.8	0.01310611	22.8	0.01109829	22.8	0.01045566	22.8	0.00515874	22.8	0.01360774
23	0.00946602	23	0.00891693	23	0.01593052	23	0.01935464	23	0.00848595	23	0.01355173	23	0.01646658	23	0.0145686	23	0.02194338	23	0.01555605	23	0.00831448	23	0.01383994	23	0.01268413	23	0.0125408	23	0.00688752	23	0.00903242
23.2	0.0091194	23.2	0.00915572	23.2	0.0127013	23.2	0.01900307	23.2	0.01102059	23.2	0.01506658	23.2	0.01341108	23.2	0.01407837	23.2	0.01971194	23.2	0.01223981	23.2	0.00991164	23.2	0.01660318	23.2	0.01447065	23.2	0.01356915	23.2	0.00862609	23.2	0.01207892
23.4	0.00565072	23.4	0.01022678	23.4	0.01324588	23.4	0.02103158	23.4	0.00516956	23.4	0.02068649	23.4	0.01508788	23.4	0.01629308	23.4	0.02502152	23.4	0.01651116	23.4	0.01154943	23.4	0.01143558	23.4	0.01490642	23.4	0.01005558	23.4	0.00544821	23.4	0.0135228
23.6	0.01273496	23.6	0.01109077	23.6	0.01364831	23.6	0.02237123	23.6	0.01049865	23.6	0.02099132	23.6	0.01726764	23.6	0.01628189	23.6	0.01943211	23.6	0.01483367	23.6	0.00781878	23.6	0.01627812	23.6	0.01341027	23.6	0.01022451	23.6	0.00533348	23.6	0.01319783
23.8	0.00795888	23.8	0.01245068	23.8	0.01421972	23.8	0.02324934	23.8	0.01211484	23.8	0.01413692	23.8	0.01258662	23.8	0.01364532	23.81	0.01589319	23.81	0.01508958	23.81	0.010452	23.81	0.01574415	23.81	0.01550592	23.81	0.01224941	23.81	0.00656035	23.81	0.0121012
24	0.00849878	24	0.00830931	24	0.01664644	24	0.0285217	24	0.00999355	24	0.01846217	24	0.00793389	24	0.01595283	24	0.01522296	24	0.01566735	24	0.01366685	24	0.01337895	24	0.01018988	24	0.01160271	24	0.00410685	24	0.0099253
24.2	0.01156153	24.2	0.01280493	24.2	0.01319822	24.2	0.02367092	24.2	0.00648558	24.2	0.01757968	24.2	0.01530206	24.2	0.01434695	24.2	0.01811173	24.2	0.01430338	24.2	0.00863752	24.2	0.01091392	24.2	0.01323543	24.2	0.0101861	24.2	0.00324372	24.2	0.01540807
24.4	0.01310522	24.4	0.00867305	24.4	0.01389681	24.4	0.02379783	24.4	0.00774567	24.4	0.0154682	24.4	0.01362698	24.4	0.01750015	24.4	0.02212043	24.4	0.01521133	24.4	0.00691768	24.4	0.01309863	24.4	0.01384001	24.4	0.01065954	24.4	0.00460914	24.4	0.01221146
24.6	0.01125542	24.6	0.01099149	24.6	0.01444655	24.6	0.02314715	24.6	0.01497018	24.6	0.01884688	24.6	0.0155838	24.6	0.01753287	24.6	0.01805332	24.6	0.01589524	24.6	0.01025252	24.6	0.01578937	24.6	0.01553465	24.6	0.01612032	24.6	0.00525198	24.6	0.01327835
24.8	0.00440524	24.8	0.01129396	24.8	0.01554792	24.8	0.02255422	24.8	0.01478072	24.8	0.018249	24.8	0.01444031	24.8	0.01483123	24.8	0.02193154	24.8	0.01041672	24.8	0.00797678	24.8	0.01521035	24.8	0.01230312	24.8	0.00855471	24.8	0.00703701	24.8	0.00960517
25	0.00928362	25	0.01035977	25	0.01470367	25	0.02181498	25	0.00785714	25	0.01735191	25	0.01390705	25	0.01689581	25	0.01671477	25	0.01271677	25	0.01041232	25	0.01613794	25	0.01224479	25	0.01044113	25	0.0076352	25	0.00714377
25.2	0.00743469	25.2	0.01219586	25.2	0.01556487	25.2	0.02143525	25.2	0.01272475	25.2	0.01536819	25.2	0.01560495	25.2	0.00960172	25.2	0.01792416	25.2	0.01031905	25.2	0.01409942	25.2	0.0166191	25.2	0.01795414	25.2	0.00764799	25.2	0.00569181	25.2	0.01317572
25.4	0.01382284	25.4	0.01081136	25.4	0.01147103	25.4	0.01933746	25.4	0.01336448	25.4	0.01858904	25.4	0.01576981	25.4	0.01912523	25.4	0.01834851	25.4	0.01784495	25.4	0.01433762	25.4	0.01825944	25.4	0.01130393	25.4	0.01268735	25.4	0.00659014	25.4	0.01454938
25.6	0.00938755	25.6	0.01005905	25.6	0.01456257	25.6	0.02561195	25.6	0.01744893	25.6	0.01629589	25.6	0.01636759	25.6	0.01640357	25.6	0.02162546	25.6	0.02000323	25.6	0.01201682	25.6	0.02185548	25.6	0.01392239	25.6	0.01216457	25.6	0.001081	25.6	0.01115479
25.8	0.0087374	25.8	0.01029946	25.8	0.01437222	25.8	0.02369888	25.8	0.01365843	25.8	0.01581017	25.8	0.01392576	25.8	0.01344984	25.8	0.01902961	25.8	0.01728046	25.8	0.00719673	25.8	0.01670821	25.8	0.01604114	25.8	0.0126353	25.8	0.00725618	25.8	0.01181367
26	0.01159459	26	0.0065295	26	0.01409036	26	0.0210322	26	0.01397141	26	0.01643927	26	0.01798039	26	0.01946062	26	0.01649478	26	0.01027939	26	0.00904892	26	0.01614542	26	0.01305909	26	0.01233038	26	0.0063489	26	0.01217717
26.2	0.01240162	26.2	0.0092699	26.2	0.01062285	26.2	0.02091768	26.2	0.00963193	26.2	0.02243718	26.2	0.01583203	26.2	0.02376745	26.2	0.01833189	26.2	0.0168091	26.2	0.01330153	26.2	0.01747271	26.2	0.01560795	26.2	0.01633679	26.2	0.00791449	26.2	0.01103711
26.4	0.01451629	26.4	0.01314237	26.4	0.01175238	26.4	0.02821413	26.4	0.01170105	26.4	0.01880018	26.4	0.01651842	26.4	0.01691247	26.4	0.02057964	26.4	0.01685563	26.4	0.01235891	26.4	0.01557868	26.4	0.01422383	26.4	0.01310114	26.4	0.0074913	26.4	0.01242808
26.6	0.01099448	26.6	0.00594534	26.6	0.01554096	26.6	0.0231875	26.6	0.00719132	26.6	0.01656874	26.6	0.01849968	26.6	0.01627764	26.6	0.02063364	26.6	0.01117115	26.6	0.00981941	26.6	0.01879603	26.6	0.01148095	26.6	0.01363252	26.6	0.00652742	26.6	0.01035625
26.8	0.00825189	26.8	0.01231855	26.8	0.01376378	26.8	0.02218973	26.8	0.01107547	26.8	0.01725143	26.8	0.01477618	26.8	0.01375059	26.8	0.02120019	26.8	0.01723453	26.8	0.01105506	26.8	0.01110098	26.8	0.0120708	26.8	0.01060874	26.8	0.00547805	26.8	0.0125769
27	0.01064972	27	0.00549529	27	0.0154968	27	0.02035268	27	0.00912368	27	0.01561531	27	0.0162208	27	0.01937434	27	0.02002347	27	0.015835	27	0.00801991	27	0.01823676	27	0.01265767	27	0.01312657	27	0.00329638	27	0.01278689
27.2	0.01339006	27.2	0.00694848	27.2	0.0169151	27.2	0.02490845	27.2	0.01121877	27.2	0.01913806	27.2	0.01692901	27.2	0.01951379	27.2	0.01582778	27.2	0.01686761	27.2	0.01163609	27.2	0.01498727	27.2	0.01856281	27.2	0.01087353	27.2	0.00250965	27.2	0.01305104
27.4	0.01514667	27.4	0.00864308	27.4	0.01536295	27.4	0.02320841	27.4	0.01025297	27.4	0.01798685	27.4	0.01771339	27.4	0.0169649	27.4	0.0217157	27.4	0.0147377	27.4	0.01057695	27.4	0.01638987	27.4	0.01179815	27.4	0.015773	27.4	0.00295331	27.4	0.0139869
27.6	0.01057271	27.6	0.01537946	27.6	0.01122216	27.6	0.02404686	27.6	0.00818061	27.6	0.01624606	27.6	0.01434473	27.6	0.02521816	27.6	0.02074766	27.6	0.01503236	27.6	0.00988713	27.6	0.01799679	27.6	0.01065336	27.6	0.0157323	27.6	0.00765273	27.6	0.01514205
27.8	0.01075691	27.8	0.01157655	27.8	0.01110085	27.8	0.02359905	27.8	0.01002025	27.8	0.02433838	27.8	0.01559558	27.8	0.01920616	27.8	0.02132525	27.8	0.01912985	27.8	0.00747129	27.8	0.01555687	27.8	0.01505399	27.8	0.01227233	27.8	0.00543627	27.8	0.01621849
28	0.01227186	28	0.00652469	28	0.0176857	28	0.02942536	28	0.01155866	28	0.01538129	28	0.01503045	28	0.01972878	28	0.01890177	28	0.01842201	28	0.01108957	28	0.01426239	28	0.00869194	28	0.01336526	28	0.00664658	28	0.00921146
28.2	0.01097749	28.2	0.01480105	28.2	0.02009545	28.2	0.02254659	28.2	0.01204514	28.2	0.0149758	28.2	0.0118697	28.2	0.01541167	28.2	0.02018964	28.2	0.02024532	28.2	0.01474147	28.2	0.01244869	28.2	0.01437539	28.2	0.01293289	28.2	0.00319012	28.2	0.01636274
28.4	0.00923593	28.4	0.00727209	28.4	0.016255	28.4	0.02409819	28.4	0.01179554	28.4	0.01838309	28.4	0.01572726	28.4	0.01703976	28.4	0.0182222	28.4	0.01566128	28.4	0.01439496	28.4	0.01866644	28.4	0.01320677	28.4	0.01036211	28.4	0.00751467	28.4	0.01244486
28.6	0.00759385	28.6	0.00774761	28.6	0.01363449	28.6	0.02579811	28.6	0.00824767	28.6	0.02162345	28.6	0.018876	28.6	0.01634937	28.6	0.02304119	28.6	0.01754025	28.6	0.01047272	28.6	0.01587498	28.6	0.01711131	28.6	0.01512954	28.6	0.00421211	28.6	0.01038366
28.8	0.00940703	28.8	0.00959538	28.8	0.01316063	28.8	0.02575953	28.8	0.01190502	28.8	0.01515316	28.8	0.02125709	28.8	0.01639143	28.8	0.02036865	28.8	0.0166365	28.8	0.00929171	28.8	0.01584577	28.8	0.00922185	28.8	0.01341395	28.8	0.00719498	28.8	0.00954044
29	0.00930459	29	0.01153315	29	0.01160483	29	0.02419162	29	0.01088349	29	0.01694053	29	0.01796643	29	0.01845965	29	0.02450036	29	0.01699179	29	0.00618789	29	0.01345957	29	0.00785768	29	0.0136721	29	0.00753428	29	0.01006194
29.2	0.01361726	29.2	0.01116029	29.2	0.01603309	29.2	0.02728467	29.2	0.00670909	29.2	0.0153617	29.2	0.01223784	29.2	0.01612243	29.2	0.02077435	29.2	0.01738297	29.2	0.0087012	29.2	0.01853311	29.2	0.01115205	29.2	0.0155599	29.2	0.00696351	29.2	0.00846469
29.4	0.00985046	29.4	0.01101137	29.4	0.01235644	29.4	0.02393631	29.4	0.00939849	29.4	0.02023933	29.4	0.01450256	29.4	0.01968133	29.4	0.02200718	29.4	0.02051563	29.4	0.01121839	29.4	0.0139001	29.4	0.01365156	29.4	0.01024337	29.4	0.00884936	29.4	0.01417609
29.6	0.00881638	29.6	0.0092399	29.6	0.01543112	29.6	0.02537369	29.6	0.01238049	29.6	0.01759166	29.6	0.01178735	29.6	0.01584255	29.6	0.01880743	29.6	0.01530378	29.6	0.00846243	29.6	0.01450661	29.6	0.01562942	29.6	0.01230207	29.6	0.00602678	29.6	0.01351855
29.8	0.01096892	29.8	0.00783189	29.8	0.01484834	29.8	0.026394	29.8	0.00926641	29.8	0.01999792	29.8	0.01861623	29.8	0.01775487	29.8	0.02108845	29.8	0.01647387	29.8	0.00973859	29.8	0.01579313	29.8	0.01221901	29.8	0.01183912	29.8	0.0093477	29.8	0.01484949
30	-3.840677	30	-3.650305	30	-3.754388	30	-3.819689	30	-3.759748	30	-3.80324	30	-3.774533	30	-2.719738	30	-3.865924	30	-3.857446	30	-3.812141	30	-3.868903	30	-3.924476	30	-3.896761	30	-3.938114	30	-3.858898
30.2	-3.99341	30.2	-3.822835	30.2	-3.932291	30.2	-3.999055	30.2	-3.907417	30.2	-3.981472	30.2	-3.946029	30.2	-2.847201	30.2	-3.982225	30.2	-3.971314	30.2	-3.950788	30.2	-3.998037	30.2	-4.050268	30.2	-4.018709	30.2	-4.063844	30.2	-3.996354
30.4	-4.104504	30.4	-3.94269	30.4	-4.04315	30.4	-4.130279	30.4	-4.007858	30.4	-4.108868	30.4	-4.069188	30.4	-2.941201	30.4	-4.077695	30.4	-4.065088	30.4	-4.038373	30.4	-4.094788	30.4	-4.146661	30.4	-4.114341	30.4	-4.166114	30.4	-4.095705
30.6	-4.18539	30.6	-4.033419	30.6	-4.129059	30.6	-4.226393	30.6	-4.08615	30.6	-4.194061	30.6	-4.161005	30.6	-3.006404	30.6	-4.151928	30.6	-4.141415	30.6	-4.1176	30.6	-4.168542	30.6	-4.221684	30.6	-4.194339	30.6	-4.248765	30.6	-4.174067
30.8	-4.246842	30.8	-4.09954	30.8	-4.210381	30.8	-4.305681	30.8	-4.157435	30.8	-4.261265	30.8	-4.237074	30.8	-3.059347	30.8	-4.219141	30.8	-4.211493	30.8	-4.193308	30.8	-4.233947	30.8	-4.291871	30.8	-4.268931	30.8	-4.31437	30.8	-4.242973
31	-4.311092	31	-4.168958	31	-4.264524	31	-4.369041	31	-4.209396	31	-4.325324	31	-4.295175	31	-3.110159	31	-4.271354	31	-4.267301	31	-4.242069	31	-4.290491	31	-4.3529	31	-4.323801	31	-4.376206	31	-4.301804
31.2	-4.367713	31.2	-4.221557	31.2	-4.318641	31.2	-4.429604	31.2	-4.262762	31.2	-4.381198	31.2	-4.352918	31.2	-3.151581	31.2	-4.317197	31.2	-4.314488	31.2	-4.289336	31.2	-4.338921	31.2	-4.398598	31.2	-4.374306	31.2	-4.426468	31.2	-4.348667
31.4	-4.413825	31.4	-4.271132	31.4	-4.375938	31.4	-4.478116	31.4	-4.306238	31.4	-4.428964	31.4	-4.39528	31.4	-3.193598	31.4	-4.355824	31.4	-4.361607	31.4	-4.342478	31.4	-4.387519	31.4	-4.439175	31.4	-4.41457	31.4	-4.474035	31.4	-4.399372
31.6	-4.453877	31.6	-4.314997	31.6	-4.413857	31.6	-4.517878	31.6	-4.351587	31.6	-4.472984	31.6	-4.444815	31.6	-3.229163	31.6	-4.39492	31.6	-4.405424	31.6	-4.377628	31.6	-4.424712	31.6	-4.482472	31.6	-4.451863	31.6	-4.514036	31.6	-4.435957
31.8	-4.493704	31.8	-4.34621	31.8	-4.459067	31.8	-4.561031	31.8	-4.389071	31.8	-4.511393	31.8	-4.482584	31.8	-3.262352	31.8	-4.431211	31.8	-4.440456	31.8	-4.408658	31.8	-4.458488	31.8	-4.518122	31.8	-4.493351	31.8	-4.549019	31.8	-4.47411
32	-4.528901	32	-4.386634	32	-4.495413	32	-4.603871	32	-4.426059	32	-4.54515	32	-4.51755	32	-3.2869	32	-4.458138	32	-4.470719	32	-4.452092	32	-4.491336	32	-4.555009	32	-4.523562	32	-4.587931	32	-4.502546
32.2	-4.562194	32.2	-4.42295	32.2	-4.527544	32.2	-4.632433	32.2	-4.45062	32.2	-4.581728	32.2	-4.547479	32.2	-3.312605	32.2	-4.496692	32.2	-4.498129	32.2	-4.476511	32.2	-4.529965	32.2	-4.586596	32.2	-4.550487	32.2	-4.610353	32.2	-4.535714
32.4	-4.595911	32.4	-4.450415	32.4	-4.551614	32.4	-4.663662	32.4	-4.479884	32.4	-4.615232	32.4	-4.585098	32.4	-3.338442	32.4	-4.52693	32.4	-4.527971	32.4	-4.503798	32.4	-4.551276	32.4	-4.604526	32.4	-4.580762	32.4	-4.641587	32.4	-4.564691
32.6	-4.618048	32.6	-4.476563	32.6	-4.589661	32.6	-4.695312	32.6	-4.508056	32.6	-4.640471	32.6	-4.613168	32.6	-3.362934	32.6	-4.544282	32.6	-4.553932	32.6	-4.539603	32.6	-4.57998	32.6	-4.637293	32.6	-4.609396	32.6	-4.669507	32.6	-4.589445
32.8	-4.644005	32.8	-4.504797	32.8	-4.611372	32.8	-4.722085	32.8	-4.533917	32.8	-4.664789	32.8	-4.640484	32.8	-3.379386	32.8	-4.565418	32.8	-4.577664	32.8	-4.556937	32.8	-4.600829	32.8	-4.662031	32.8	-4.632566	32.8	-4.696588	32.8	-4.616928
33.01	-4.671882	33.01	-4.530515	33.01	-4.633641	33.01	-4.748257	33.01	-4.559439	33.01	-4.691139	33.01	-4.662938	33.01	-3.402201	33	-4.593206	33	-4.598964	33	-4.575167	33	-4.627869	33	-4.681645	33	-4.654072	33	-4.718854	33	-4.634933
33.2	-4.683569	33.2	-4.548627	33.2	-4.658962	33.2	-4.778195	33.2	-4.581519	33.2	-4.715922	33.2	-4.683265	33.2	-3.416721	33.2	-4.606695	33.2	-4.622475	33.2	-4.605572	33.2	-4.646328	33.2	-4.699502	33.2	-4.675982	33.2	-4.736833	33.2	-4.659899
33.4	-4.71272	33.4	-4.57511	33.4	-4.684804	33.4	-4.795944	33.4	-4.604806	33.4	-4.73889	33.4	-4.708361	33.4	-3.433064	33.4	-4.629572	33.4	-4.644113	33.4	-4.622124	33.4	-4.663616	33.4	-4.723299	33.4	-4.699928	33.4	-4.762704	33.4	-4.676077
33.6	-4.732789	33.6	-4.592823	33.6	-4.701488	33.6	-4.817505	33.6	-4.624968	33.6	-4.755364	33.6	-4.729492	33.6	-3.453203	33.6	-4.645708	33.6	-4.660721	33.6	-4.63357	33.6	-4.683254	33.6	-4.746501	33.6	-4.715575	33.6	-4.77913	33.6	-4.69835
33.8	-4.749638	33.8	-4.618273	33.8	-4.728161	33.8	-4.834855	33.8	-4.644132	33.8	-4.782068	33.8	-4.749658	33.8	-3.468824	33.8	-4.664643	33.8	-4.672704	33.8	-4.658004	33.8	-4.702071	33.8	-4.757532	33.8	-4.72768	33.8	-4.79463	33.8	-4.713692
34.01	-4.773394	34.01	-4.641684	34.01	-4.74335	34.01	-4.856111	34.01	-4.660281	34.01	-4.800645	34.01	-4.763803	34.01	-3.482912	34	-4.678056	34	-4.690388	34	-4.677019	34	-4.720736	34	-4.779182	34	-4.751819	34	-4.812173	34	-4.729864
34.2	-4.791137	34.2	-4.651026	34.2	-4.758403	34.2	-4.8739	34.2	-4.676046	34.2	-4.815626	34.2	-4.789841	34.2	-3.49346	34.2	-4.698589	34.2	-4.70881	34.2	-4.683049	34.2	-4.732692	34.2	-4.791222	34.2	-4.762385	34.2	-4.829894	34.2	-4.748655
34.4	-4.804782	34.4	-4.666833	34.4	-4.771921	34.4	-4.888069	34.4	-4.686847	34.4	-4.830198	34.4	-4.801085	34.4	-3.509429	34.4	-4.706899	34.4	-4.719807	34.4	-4.701702	34.4	-4.746579	34.4	-4.804786	34.4	-4.780443	34.4	-4.847381	34.4	-4.761565
34.6	-4.818813	34.6	-4.679924	34.6	-4.789843	34.6	-4.904052	34.6	-4.706108	34.6	-4.843694	34.6	-4.819003	34.6	-3.518976	34.6	-4.721524	34.6	-4.738583	34.6	-4.718581	34.6	-4.76308	34.6	-4.82207	34.6	-4.791959	34.6	-4.857744	34.6	-4.77534
34.8	-4.823617	34.8	-4.689721	34.8	-4.795681	34.8	-4.912926	34.8	-4.709374	34.8	-4.85441	34.8	-4.825646	34.8	-3.527939	34.8	-4.730361	34.8	-4.745494	34.8	-4.718658	34.8	-4.768223	34.8	-4.828943	34.8	-4.801997	34.8	-4.866182	34.8	-4.783047
35	-0.7629465	35	-0.7762162	35	-0.7905089	35	-0.7859216	35	-0.7919254	35	-0.7946604	35	-0.7785051	35	-0.5865433	35	-0.7284856	35	-0.7266423	35	-0.7543308	35	-0.7452968	35	-0.7644975	35	-0.7588551	35	-0.7720775	35	-0.7401489
35.2	-0.7364718	35.2	-0.7423568	35.2	-0.7609653	35.2	-0.7584862	35.2	-0.7598546	35.2	-0.7543461	35.2	-0.7481004	35.2	-0.5652022	35.2	-0.6961268	35.2	-0.6911842	35.2	-0.7220261	35.2	-0.7131963	35.2	-0.7327303	35.2	-0.7191919	35.2	-0.7324703	35.2	-0.707941
35.4	-0.715345	35.4	-0.715976	35.4	-0.733806	35.4	-0.7302936	35.4	-0.730592	35.4	-0.7313166	35.4	-0.7206178	35.4	-0.5468569	35.4	-0.6737948	35.4	-0.6645936	35.4	-0.6933653	35.4	-0.6826444	35.4	-0.7035627	35.4	-0.6890839	35.4	-0.7112957	35.4	-0.6782449
35.6	-0.689234	35.6	-0.6946181	35.6	-0.7116786	35.6	-0.7123027	35.6	-0.7087955	35.6	-0.7053921	35.6	-0.6981149	35.6	-0.5262416	35.6	-0.6562458	35.6	-0.6398492	35.6	-0.6749426	35.6	-0.6573038	35.6	-0.6783164	35.6	-0.668268	35.6	-0.6828588	35.6	-0.6516459
35.8	-0.6748701	35.8	-0.6697463	35.8	-0.6879832	35.8	-0.6886394	35.8	-0.6909507	35.8	-0.6839421	35.8	-0.681799	35.8	-0.5144962	35.8	-0.6380593	35.8	-0.622033	35.8	-0.6571136	35.8	-0.6373481	35.8	-0.6566516	35.8	-0.6466948	35.8	-0.6656373	35.8	-0.638864
36	-0.6580614	36	-0.6596569	36	-0.6738629	36	-0.6727065	36	-0.6712181	36	-0.6704276	36	-0.6682149	36	-0.5041426	36	-0.6201231	36	-0.6089209	36	-0.6325119	36	-0.6226322	36	-0.6445856	36	-0.6318873	36	-0.6508619	36	-0.6183484
36.2	-0.6457246	36.2	-0.6425663	36.2	-0.6573545	36.2	-0.6556287	36.2	-0.6591526	36.2	-0.6560159	36.2	-0.6445909	36.2	-0.495283	36.2	-0.6070271	36.2	-0.5964286	36.2	-0.6220719	36.2	-0.603466	36.2	-0.6271017	36.2	-0.6180199	36.2	-0.6319281	36.2	-0.6067963
36.4	-0.6340799	36.4	-0.6312284	36.4	-0.6456803	36.4	-0.647836	36.4	-0.6467555	36.4	-0.6433398	36.4	-0.6388661	36.4	-0.4826784	36.4	-0.5940182	36.4	-0.5800369	36.4	-0.607331	36.4	-0.5900619	36.4	-0.6182123	36.4	-0.6047534	36.4	-0.6183249	36.4	-0.5942817
36.6	-0.6248153	36.6	-0.6205016	36.6	-0.6340017	36.6	-0.6321169	36.6	-0.6359245	36.6	-0.6275146	36.6	-0.6273593	36.6	-0.4722289	36.6	-0.5847556	36.6	-0.5695495	36.6	-0.5977938	36.6	-0.5823916	36.6	-0.6069542	36.6	-0.5944529	36.6	-0.6081171	36.6	-0.58246
36.8	-0.6119473	36.8	-0.6093202	36.8	-0.6212741	36.8	-0.6249295	36.8	-0.6243938	36.8	-0.621336	36.8	-0.6168182	36.8	-0.4661722	36.8	-0.5738799	36.8	-0.5572133	36.8	-0.5836245	36.8	-0.5706027	36.8	-0.5947766	36.8	-0.583685	36.8	-0.591273	36.8	-0.5691007
37	-0.6030384	37	-0.5945571	37	-0.6139475	37	-0.6077482	37	-0.6109991	37	-0.6066644	37	-0.6048036	37	-0.4595094	37	-0.5649621	37	-0.5529228	37	-0.5729263	37	-0.5632489	37	-0.5820839	37	-0.5705308	37	-0.5891358	37	-0.5609913
37.2	-0.589186	37.2	-0.5934194	37.2	-0.6067901	37.2	-0.5998748	37.2	-0.6053768	37.2	-0.597304	37.2	-0.5952844	37.2	-0.4511624	37.2	-0.5578725	37.2	-0.5366962	37.2	-0.5677055	37.2	-0.5530014	37.2	-0.5732465	37.2	-0.5649477	37.2	-0.5766072	37.2	-0.5534068
37.4	-0.5846215	37.4	-0.5840959	37.4	-0.5970389	37.4	-0.5962026	37.4	-0.5959439	37.4	-0.5920838	37.4	-0.5877498	37.4	-0.4501315	37.4	-0.5467356	37.4	-0.5347093	37.4	-0.5558937	37.4	-0.5444068	37.4	-0.5611215	37.4	-0.5526136	37.4	-0.5720398	37.4	-0.5431819
37.6	-0.5782121	37.6	-0.5735974	37.6	-0.5897298	37.6	-0.5862408	37.6	-0.5906641	37.6	-0.5851564	37.6	-0.5779123	37.6	-0.444707	37.6	-0.5419246	37.6	-0.5230955	37.6	-0.5465062	37.6	-0.5351005	37.6	-0.5571738	37.6	-0.5480257	37.6	-0.558129	37.6	-0.534596
37.8	-0.5749097	37.8	-0.5709896	37.8	-0.5814419	37.8	-0.5800143	37.8	-0.5842046	37.8	-0.5787858	37.8	-0.567684	37.8	-0.4340482	37.8	-0.5329204	37.8	-0.5210974	37.8	-0.5418843	37.8	-0.5291818	37.8	-0.5545877	37.8	-0.5379046	37.8	-0.5556594	37.8	-0.525938
38	-0.5654259	38	-0.5667726	38	-0.5704097	38	-0.5727187	38	-0.5774549	38	-0.5709066	38	-0.5646923	38	-0.4297526	38	-0.5310019	38	-0.5095111	38	-0.5411735	38	-0.519171	38	-0.5473003	38	-0.5342989	38	-0.5477368	38	-0.5238366
38.2	-0.560355	38.2	-0.5573217	38.2	-0.571043	38.2	-0.5618711	38.2	-0.5673134	38.2	-0.5585037	38.2	-0.55826	38.2	-0.4237704	38.2	-0.5259905	38.2	-0.5048301	38.2	-0.5260302	38.2	-0.518292	38.2	-0.5394446	38.2	-0.5284923	38.2	-0.541254	38.2	-0.5184718
38.4	-0.5549151	38.4	-0.5484349	38.4	-0.561734	38.4	-0.5568056	38.4	-0.5635806	38.4	-0.5553345	38.4	-0.5504179	38.4	-0.4174586	38.4	-0.5146463	38.4	-0.5005615	38.4	-0.5232532	38.4	-0.507936	38.4	-0.5319562	38.4	-0.5143731	38.4	-0.5353013	38.4	-0.5099127
38.6	-0.5518181	38.6	-0.5424393	38.6	-0.5543644	38.6	-0.5556957	38.6	-0.5587074	38.6	-0.5504009	38.6	-0.5460032	38.6	-0.4187813	38.6	-0.513561	38.6	-0.4950802	38.6	-0.5184331	38.6	-0.5037085	38.6	-0.5281084	38.6	-0.5164483	38.6	-0.5271572	38.6	-0.5066957
38.8	-0.5448987	38.8	-0.5363372	38.8	-0.5481198	38.8	-0.5496207	38.8	-0.5530031	38.8	-0.5443367	38.8	-0.5412707	38.8	-0.4124662	38.8	-0.5042944	38.8	-0.4898883	38.8	-0.5123733	38.8	-0.5009006	38.8	-0.5230865	38.8	-0.5100322	38.8	-0.5229455	38.8	-0.4998235
39	-0.5365079	39	-0.5362899	39	-0.5419163	39	-0.5423322	39	-0.5478284	39	-0.536454	39	-0.5401784	39	-0.4112364	39	-0.5001786	39	-0.4877484	39	-0.5087355	39	-0.4925373	39	-0.5132071	39	-0.507244	39	-0.5202354	39	-0.493496
39.2	-0.5380455	39.2	-0.5343312	39.2	-0.5422398	39.2	-0.5400419	39.2	-0.5510078	39.2	-0.5346853	39.2	-0.5332675	39.2	-0.4006484	39.2	-0.4958545	39.2	-0.4832341	39.2	-0.5031709	39.2	-0.4880705	39.2	-0.5182064	39.2	-0.4984663	39.2	-0.5160028	39.2	-0.4910761
39.4	-0.5301392	39.4	-0.5235091	39.4	-0.5349638	39.4	-0.5297217	39.4	-0.5378619	39.4	-0.5271819	39.4	-0.5254227	39.4	-0.4007723	39.4	-0.4925038	39.4	-0.4805854	39.4	-0.4965106	39.4	-0.4901137	39.4	-0.5110629	39.4	-0.4973128	39.4	-0.5088908	39.4	-0.4887799
39.6	-0.5304063	39.6	-0.5238072	39.6	-0.5334026	39.6	-0.5250382	39.6	-0.5392478	39.6	-0.5246719	39.6	-0.5228248	39.6	-0.3934688	39.6	-0.4881539	39.6	-0.4736996	39.6	-0.4998779	39.6	-0.4814585	39.6	-0.5065677	39.6	-0.4913159	39.6	-0.5071473	39.6	-0.4817668
39.8	-0.5241742	39.8	-0.5211851	39.8	-0.5323898	39.8	-0.5260709	39.8	-0.5326578	39.8	-0.5215005	39.8	-0.5223975	39.8	-0.3964999	39.8	-0.4855775	39.8	-0.4691807	39.8	-0.4915561	39.8	-0.4794491	39.8	-0.5016	39.8	-0.4867613	39.8	-0.5026093	39.8	-0.4816417
40	-4.478152	40	-4.288672	40	-4.388685	40	-4.43018	40	-4.314835	40	-4.421534	40	-4.383005	40	-3.187032	40	-4.417252	40	-4.417922	40	-4.370361	40	-4.421966	40	-4.496279	40	-4.429395	40	-4.497797	40	-4.400414
40.2	-4.56112	40.2	-4.396002	40.2	-4.487523	40.2	-4.555674	40.2	-4.423032	40.2	-4.531224	40.2	-4.494751	40.2	-3.271101	40.2	-4.479525	40.2	-4.478836	40.2	-4.435682	40.2	-4.481975	40.2	-4.559868	40.2	-4.495551	40.2	-4.561445	40.2	-4.474937
40.4	-4.611447	40.4	-4.456806	40.4	-4.558745	40.4	-4.634493	40.4	-4.477711	40.4	-4.594535	40.4	-4.562094	40.4	-3.32449	40.4	-4.523025	40.4	-4.526544	40.4	-4.493014	40.4	-4.537523	40.4	-4.608266	40.4	-4.548701	40.4	-4.612709	40.4	-4.522179
40.6	-4.654405	40.6	-4.500434	40.6	-4.603611	40.6	-4.692735	40.6	-4.525693	40.6	-4.63976	40.6	-4.602658	40.6	-3.35831	40.6	-4.556149	40.6	-4.556287	40.6	-4.529888	40.6	-4.569086	40.6	-4.645925	40.6	-4.58579	40.6	-4.650259	40.6	-4.56034
40.8	-4.689309	40.8	-4.540698	40.8	-4.638518	40.8	-4.737346	40.8	-4.559646	40.8	-4.674297	40.8	-4.647646	40.8	-3.387286	40.8	-4.587192	40.8	-4.587325	40.8	-4.550717	40.8	-4.602032	40.8	-4.669689	40.8	-4.617586	40.8	-4.682832	40.8	-4.600749
41	-4.709972	41	-4.573417	41	-4.675807	41	-4.770592	41	-4.59384	41	-4.70849	41	-4.676807	41	-3.4151	41	-4.610798	41	-4.612944	41	-4.587722	41	-4.627687	41	-4.695536	41	-4.644689	41	-4.710518	41	-4.617833
41.2	-4.737178	41.2	-4.5995	41.2	-4.710499	41.2	-4.80171	41.2	-4.617824	41.2	-4.735488	41.2	-4.707321	41.2	-3.439507	41.2	-4.627212	41.2	-4.63385	41.2	-4.610375	41.2	-4.648739	41.2	-4.719369	41.2	-4.670237	41.2	-4.735035	41.2	-4.648448
41.4	-4.762179	41.4	-4.624237	41.4	-4.723039	41.4	-4.817407	41.4	-4.646616	41.4	-4.761324	41.4	-4.733408	41.4	-3.455545	41.4	-4.654046	41.4	-4.654509	41.4	-4.624175	41.4	-4.673414	41.4	-4.737811	41.4	-4.690545	41.4	-4.755416	41.4	-4.67094
41.6	-4.779698	41.6	-4.642948	41.6	-4.746255	41.6	-4.843716	41.6	-4.6633	41.6	-4.786288	41.6	-4.753991	41.6	-3.476244	41.6	-4.676134	41.6	-4.674324	41.6	-4.650211	41.6	-4.687139	41.6	-4.75177	41.6	-4.70166	41.6	-4.775044	41.6	-4.689623
41.8	-4.803272	41.8	-4.663142	41.8	-4.768469	41.8	-4.865176	41.8	-4.686295	41.8	-4.801824	41.8	-4.77103	41.8	-3.48818	41.8	-4.691012	41.8	-4.69178	41.8	-4.671806	41.8	-4.708438	41.8	-4.772335	41.8	-4.728277	41.8	-4.789969	41.8	-4.700552
42	-4.822737	42	-4.681373	42	-4.786625	42	-4.88513	42	-4.701893	42	-4.824852	42	-4.788874	42	-3.506682	42	-4.701512	42	-4.706511	42	-4.677609	42	-4.724444	42	-4.789507	42	-4.739445	42	-4.806121	42	-4.718457
42.2	-4.828607	42.2	-4.700627	42.2	-4.80268	42.2	-4.899943	42.2	-4.71585	42.2	-4.83408	42.2	-4.805161	42.2	-3.521645	42.2	-4.716446	42.2	-4.721313	42.2	-4.693502	42.2	-4.736267	42.2	-4.804429	42.2	-4.759195	42.2	-4.824556	42.2	-4.734478
42.4	-4.842506	42.4	-4.716642	42.4	-4.819016	42.4	-4.918749	42.4	-4.735621	42.4	-4.85327	42.4	-4.819349	42.4	-3.535331	42.4	-4.723958	42.4	-4.731647	42.4	-4.720513	42.4	-4.749259	42.4	-4.816282	42.4	-4.764726	42.4	-4.838265	42.4	-4.749089
42.6	-4.858287	42.6	-4.730476	42.6	-4.829722	42.6	-4.930934	42.6	-4.744436	42.6	-4.86881	42.6	-4.832724	42.6	-3.545861	42.6	-4.739952	42.6	-4.746501	42.6	-4.719055	42.6	-4.762157	42.6	-4.828859	42.6	-4.780989	42.6	-4.851417	42.6	-4.761598
42.8	-4.872329	42.8	-4.741022	42.8	-4.838838	42.8	-4.944277	42.8	-4.758591	42.8	-4.882871	42.8	-4.846945	42.8	-3.556965	42.8	-4.753416	42.8	-4.756459	42.8	-4.735941	42.8	-4.77104	42.8	-4.84057	42.8	-4.790304	42.8	-4.861608	42.8	-4.77186
43	-4.885498	43	-4.758515	43	-4.861454	43	-4.957792	43	-4.772582	43	-4.885423	43	-4.867502	43	-3.564963	43	-4.761898	43	-4.771756	43	-4.753207	43	-4.786241	43	-4.852385	43	-4.802525	43	-4.869393	43	-4.788745
43.2	-4.895213	43.2	-4.762843	43.2	-4.869439	43.2	-4.965372	43.2	-4.780994	43.2	-4.901353	43.2	-4.872262	43.2	-3.574075	43.2	-4.775491	43.2	-4.77436	43.2	-4.755883	43.2	-4.796385	43.2	-4.857708	43.2	-4.813282	43.2	-4.884156	43.2	-4.802593
43.4	-4.904956	43.4	-4.771447	43.4	-4.871949	43.4	-4.979202	43.4	-4.790654	43.4	-4.914718	43.4	-4.881361	43.4	-3.583325	43.4	-4.783207	43.4	-4.78763	43.4	-4.764145	43.4	-4.798985	43.4	-4.87317	43.4	-4.824077	43.4	-4.893394	43.4	-4.809294
43.6	-4.916354	43.6	-4.788148	43.6	-4.892099	43.6	-4.992832	43.6	-4.799844	43.6	-4.921072	43.6	-4.894131	43.6	-3.593082	43.6	-4.793689	43.6	-4.79673	43.6	-4.783196	43.6	-4.812404	43.6	-4.879831	43.6	-4.833546	43.6	-4.9025	43.6	-4.811307
43.8	-4.925345	43.8	-4.791852	43.8	-4.897469	43.8	-5.002693	43.8	-4.814266	43.8	-4.932272	43.8	-4.904663	43.8	-3.604947	43.8	-4.803382	43.8	-4.805006	43.8	-4.787045	43.8	-4.824072	43.8	-4.891249	43.8	-4.84534	43.8	-4.913254	43.8	-4.821318
44	-4.931295	44	-4.806598	44	-4.904467	44	-5.006249	44	-4.82818	44	-4.943789	44	-4.915383	44	-3.611625	44	-4.811858	44	-4.807803	44	-4.788888	44	-4.83107	44	-4.894796	44	-4.849619	44	-4.919755	44	-4.830083
44.2	-4.948216	44.2	-4.814168	44.2	-4.921345	44.2	-5.017711	44.2	-4.829353	44.2	-4.950226	44.2	-4.919827	44.2	-3.617246	44.2	-4.817196	44.2	-4.818791	44.2	-4.805354	44.2	-4.840157	44.2	-4.902415	44.2	-4.863408	44.2	-4.925519	44.2	-4.841674
44.4	-4.955342	44.4	-4.818177	44.4	-4.925158	44.4	-5.025077	44.4	-4.841522	44.4	-4.962377	44.4	-4.930171	44.4	-3.625166	44.4	-4.824642	44.4	-4.829356	44.4	-4.814809	44.4	-4.843695	44.4	-4.916492	44.4	-4.865973	44.4	-4.935441	44.4	-4.848554
44.6	-4.960116	44.6	-4.827589	44.6	-4.927794	44.6	-5.035707	44.6	-4.847479	44.6	-4.972469	44.6	-4.942797	44.6	-3.629631	44.6	-4.830353	44.6	-4.831911	44.6	-4.81519	44.6	-4.851405	44.6	-4.920564	44.6	-4.867411	44.6	-4.943042	44.6	-4.854786
44.8	-4.961034	44.8	-4.834141	44.8	-4.940495	44.8	-5.037245	44.8	-4.852126	44.8	-4.973384	44.8	-4.944266	44.8	-3.635923	44.8	-4.834625	44.8	-4.837514	44.8	-4.820537	44.8	-4.85851	44.8	-4.922292	44.8	-4.878499	44.8	-4.942033	44.8	-4.85605
45	-0.7551206	45	-0.7728238	45	-0.7826579	45	-0.7713472	45	-0.7866012	45	-0.7722293	45	-0.7617193	45	-0.5942225	45	-0.7315164	45	-0.7185218	45	-0.7488792	45	-0.7242848	45	-0.7548918	45	-0.7366499	45	-0.7501219	45	-0.7267494
45.2	-0.7250282	45.2	-0.7467551	45.2	-0.751183	45.2	-0.7380462	45.2	-0.7523257	45.2	-0.7374459	45.2	-0.7326443	45.2	-0.5725056	45.2	-0.6994085	45.2	-0.6873745	45.2	-0.7177666	45.2	-0.6877381	45.2	-0.7294588	45.2	-0.7056691	45.2	-0.7179626	45.2	-0.6949138
45.4	-0.7000173	45.4	-0.7252319	45.4	-0.7262737	45.4	-0.7143198	45.4	-0.7301782	45.4	-0.7122679	45.4	-0.7079487	45.4	-0.5545167	45.4	-0.6765307	45.4	-0.6599507	45.4	-0.6821139	45.4	-0.6644272	45.4	-0.6981611	45.4	-0.6747531	45.4	-0.6919389	45.4	-0.6599772
45.6	-0.6851422	45.6	-0.7012179	45.6	-0.7077539	45.6	-0.6891694	45.6	-0.7045302	45.6	-0.6931798	45.6	-0.6820552	45.6	-0.5405788	45.6	-0.6552933	45.6	-0.6376849	45.6	-0.6672118	45.6	-0.6455125	45.6	-0.6738893	45.6	-0.6502873	45.6	-0.6607046	45.6	-0.6376919
45.8	-0.6621634	45.8	-0.6823892	45.8	-0.6875775	45.8	-0.6721582	45.8	-0.685214	45.8	-0.6698087	45.8	-0.6646224	45.8	-0.5228409	45.8	-0.642232	45.8	-0.6192467	45.8	-0.6441991	45.8	-0.6234863	45.8	-0.6531142	45.8	-0.6350607	45.8	-0.6417629	45.8	-0.6223379
46	-0.6526142	46	-0.6628247	46	-0.6704584	46	-0.6536101	46	-0.6748154	46	-0.653112	46	-0.6472681	46	-0.5111579	46	-0.6204518	46	-0.6048567	46	-0.6299849	46	-0.6085253	46	-0.6365806	46	-0.6167672	46	-0.6228803	46	-0.6008306
46.2	-0.6359706	46.2	-0.6521953	46.2	-0.65367	46.2	-0.6400295	46.2	-0.6618736	46.2	-0.6400144	46.2	-0.6387801	46.2	-0.505015	46.2	-0.6146346	46.2	-0.5923514	46.2	-0.6128787	46.2	-0.5924856	46.2	-0.6241844	46.2	-0.602725	46.2	-0.6127493	46.2	-0.5892328
46.4	-0.6216759	46.4	-0.6385536	46.4	-0.6442327	46.4	-0.6284183	46.4	-0.650058	46.4	-0.6232048	46.4	-0.6227247	46.4	-0.4937319	46.4	-0.5964798	46.4	-0.5840026	46.4	-0.6009275	46.4	-0.5834749	46.4	-0.6113854	46.4	-0.5838218	46.4	-0.5990219	46.4	-0.5793443
46.6	-0.6187925	46.6	-0.6261276	46.6	-0.6293639	46.6	-0.6159516	46.6	-0.6370332	46.6	-0.6181943	46.6	-0.6115342	46.6	-0.4813415	46.6	-0.5867529	46.6	-0.5617337	46.6	-0.5932966	46.6	-0.5700392	46.6	-0.6029201	46.6	-0.5778506	46.6	-0.5931416	46.6	-0.5655904
46.8	-0.6049548	46.8	-0.6220362	46.8	-0.6233444	46.8	-0.6057562	46.8	-0.6295885	46.8	-0.6014363	46.8	-0.5994799	46.8	-0.4785722	46.8	-0.5792329	46.8	-0.5601624	46.8	-0.5791615	46.8	-0.5589254	46.8	-0.5917667	46.8	-0.5680463	46.8	-0.5796639	46.8	-0.5530049
47	-0.5991774	47	-0.6085832	47	-0.6135573	47	-0.5955401	47	-0.6221832	47	-0.5897576	47	-0.5894816	47	-0.4635122	47	-0.5713561	47	-0.5551761	47	-0.5696703	47	-0.5540767	47	-0.5797083	47	-0.5595208	47	-0.5718169	47	-0.5496655
47.2	-0.5866002	47.2	-0.6054208	47.2	-0.5971483	47.2	-0.5889528	47.2	-0.6089529	47.2	-0.5882053	47.2	-0.5825024	47.2	-0.4589405	47.2	-0.563871	47.2	-0.5403391	47.2	-0.5657842	47.2	-0.5407247	47.2	-0.5739744	47.2	-0.5474096	47.2	-0.5648507	47.2	-0.536292
47.4	-0.5797599	47.4	-0.5966868	47.4	-0.5937685	47.4	-0.5768195	47.4	-0.5963467	47.4	-0.5798075	47.4	-0.5744175	47.4	-0.4604565	47.4	-0.5585952	47.4	-0.5354476	47.4	-0.5562289	47.4	-0.5375292	47.4	-0.5625064	47.4	-0.5392636	47.4	-0.5549178	47.4	-0.5284039
47.6	-0.5701233	47.6	-0.5876216	47.6	-0.5881065	47.6	-0.5782597	47.6	-0.5964279	47.6	-0.5710378	47.6	-0.5651048	47.6	-0.4515883	47.6	-0.5481953	47.6	-0.5215428	47.6	-0.5443771	47.6	-0.5286356	47.6	-0.5615497	47.6	-0.5350269	47.6	-0.5453643	47.6	-0.5234563
47.8	-0.5667159	47.8	-0.5804739	47.8	-0.5827593	47.8	-0.5658793	47.8	-0.5885119	47.8	-0.5621104	47.8	-0.5612762	47.8	-0.4473667	47.8	-0.5425918	47.8	-0.5205193	47.8	-0.5413718	47.8	-0.5190855	47.8	-0.5515012	47.8	-0.5241765	47.8	-0.5396826	47.8	-0.5122887
48	-0.5604755	48	-0.57437	48	-0.5740521	48	-0.5578746	48	-0.5784919	48	-0.5537083	48	-0.5515969	48	-0.4379306	48	-0.5350778	48	-0.5151589	48	-0.5350635	48	-0.5137215	48	-0.5460313	48	-0.5218367	48	-0.5307728	48	-0.5076126
48.2	-0.5567192	48.2	-0.5684069	48.2	-0.570163	48.2	-0.553072	48.2	-0.5780764	48.2	-0.5512332	48.2	-0.5487806	48.2	-0.43319	48.2	-0.5302988	48.2	-0.5036259	48.2	-0.5281194	48.2	-0.5041028	48.2	-0.5392871	48.2	-0.5164522	48.2	-0.5260092	48.2	-0.5014725
48.4	-0.5514616	48.4	-0.5663918	48.4	-0.5632963	48.4	-0.5485404	48.4	-0.5697104	48.4	-0.5456637	48.4	-0.545512	48.4	-0.4321344	48.4	-0.5293155	48.4	-0.4970541	48.4	-0.5208591	48.4	-0.497579	48.4	-0.5308103	48.4	-0.5062605	48.4	-0.516604	48.4	-0.4958891
48.6	-0.5435035	48.6	-0.5606692	48.6	-0.5569865	48.6	-0.5405412	48.6	-0.5634453	48.6	-0.5366361	48.6	-0.5339794	48.6	-0.4314396	48.6	-0.5206589	48.6	-0.4972539	48.6	-0.5123404	48.6	-0.4942087	48.6	-0.5260755	48.6	-0.5006353	48.6	-0.5148634	48.6	-0.4910828
48.8	-0.5415981	48.8	-0.5560986	48.8	-0.5517654	48.8	-0.5328037	48.8	-0.5596957	48.8	-0.5304801	48.8	-0.5296376	48.8	-0.4211853	48.8	-0.5128012	48.8	-0.4881087	48.8	-0.513558	48.8	-0.4933732	48.8	-0.5209796	48.8	-0.499745	48.8	-0.5059124	48.8	-0.4859328
49	-0.5327433	49	-0.5514566	49	-0.5455195	49	-0.5275832	49	-0.5549958	49	-0.5250995	49	-0.5266365	49	-0.4191452	49	-0.5082032	49	-0.4815468	49	-0.5055804	49	-0.4856199	49	-0.5166414	49	-0.4925402	49	-0.5075619	49	-0.4793365
49.2	-0.5353867	49.2	-0.5465685	49.2	-0.5465395	49.2	-0.525812	49.2	-0.5500529	49.2	-0.5242795	49.2	-0.5154405	49.2	-0.4162961	49.2	-0.5047729	49.2	-0.4830158	49.2	-0.5015805	49.2	-0.4795202	49.2	-0.5094099	49.2	-0.4839897	49.2	-0.4973291	49.2	-0.4803008
49.4	-0.5258273	49.4	-0.5384765	49.4	-0.5382636	49.4	-0.5187721	49.4	-0.5410184	49.4	-0.5173606	49.4	-0.5209279	49.4	-0.4088938	49.4	-0.5020112	49.4	-0.478045	49.4	-0.4953836	49.4	-0.4760884	49.4	-0.5074739	49.4	-0.4811549	49.4	-0.4959703	49.4	-0.4715464
49.6	-0.5214246	49.6	-0.5384598	49.6	-0.5302907	49.6	-0.5158565	49.6	-0.5426641	49.6	-0.5139149	49.6	-0.5102407	49.6	-0.4133359	49.6	-0.4989744	49.6	-0.4777057	49.6	-0.4938293	49.6	-0.4726521	49.6	-0.5046228	49.6	-0.4804896	49.6	-0.4913583	49.6	-0.4657251
49.8	-0.5220513	49.8	-0.5332485	49.8	-0.528007	49.8	-0.5142539	49.8	-0.5422707	49.8	-0.5117657	49.8	-0.5071687	49.8	-0.4095835	49.8	-0.4935783	49.8	-0.473173	49.8	-0.4921501	49.8	-0.4697944	49.8	-0.505186	49.8	-0.4767768	49.8	-0.4849957	49.8	-0.4646137
50	-4.488776	50	-4.386119	50	-4.457734	50	-4.494188	50	-4.388169	50	-4.478131	50	-4.441628	50	-3.247748	50	-4.435496	50	-4.444827	50	-4.395667	50	-4.418626	50	-4.498266	50	-4.433717	50	-4.491042	50	-4.382272
50.2	-4.571883	50.2	-4.465171	50.2	-4.549089	50.2	-4.609579	50.2	-4.478392	50.2	-4.561901	50.2	-4.537503	50.2	-3.316429	50.2	-4.501337	50.2	-4.508862	50.2	-4.464361	50.2	-4.490447	50.2	-4.568677	50.2	-4.502635	50.2	-4.559829	50.2	-4.469381
50.4	-4.621218	50.4	-4.522706	50.4	-4.612951	50.4	-4.676472	50.4	-4.529766	50.4	-4.616665	50.4	-4.587898	50.4	-3.366846	50.4	-4.538891	50.4	-4.548421	50.4	-4.509696	50.4	-4.535925	50.4	-4.615782	50.4	-4.55016	50.4	-4.614196	50.4	-4.509263
50.6	-4.66735	50.6	-4.565715	50.6	-4.644348	50.6	-4.719141	50.6	-4.567466	50.6	-4.660806	50.6	-4.635122	50.6	-3.391207	50.6	-4.577218	50.6	-4.579259	50.6	-4.550114	50.6	-4.572217	50.6	-4.648632	50.6	-4.590337	50.6	-4.647639	50.6	-4.55291
50.8	-4.69051	50.8	-4.593319	50.8	-4.677113	50.8	-4.755239	50.8	-4.602965	50.8	-4.69813	50.8	-4.670221	50.8	-3.423095	50.8	-4.604053	50.8	-4.608487	50.8	-4.575726	50.8	-4.603154	50.8	-4.67895	50.8	-4.618585	50.8	-4.675835	50.8	-4.587949
51	-4.726055	51	-4.622091	51	-4.716525	51	-4.783779	51	-4.628463	51	-4.730762	51	-4.693916	51	-3.439871	51	-4.626467	51	-4.630342	51	-4.601057	51	-4.628176	51	-4.705807	51	-4.643183	51	-4.693014	51	-4.613279
51.2	-4.744711	51.2	-4.648285	51.2	-4.732292	51.2	-4.808178	51.2	-4.657842	51.2	-4.747287	51.2	-4.718583	51.2	-3.463503	51.2	-4.643108	51.2	-4.651497	51.2	-4.621355	51.2	-4.647781	51.2	-4.721725	51.2	-4.667107	51.2	-4.720098	51.2	-4.630657
51.4	-4.760671	51.4	-4.667227	51.4	-4.755136	51.4	-4.839075	51.4	-4.674323	51.4	-4.769263	51.4	-4.742451	51.4	-3.481718	51.4	-4.664794	51.4	-4.671807	51.4	-4.648234	51.4	-4.664763	51.4	-4.74795	51.4	-4.684855	51.4	-4.743646	51.4	-4.656366
51.6	-4.784208	51.6	-4.682773	51.6	-4.77515	51.6	-4.852881	51.6	-4.69683	51.6	-4.791088	51.6	-4.756021	51.6	-3.496968	51.6	-4.682154	51.6	-4.680544	51.6	-4.650351	51.6	-4.681628	51.6	-4.756305	51.6	-4.697599	51.6	-4.76357	51.6	-4.673493
51.8	-4.795776	51.8	-4.701948	51.8	-4.787221	51.8	-4.872245	51.8	-4.707628	51.8	-4.806573	51.8	-4.778497	51.8	-3.516808	51.8	-4.692252	51.8	-4.698361	51.8	-4.667856	51.8	-4.695162	51.8	-4.771511	51.8	-4.715565	51.8	-4.773701	51.8	-4.68782
52	-4.812624	52	-4.720333	52	-4.800316	52	-4.889915	52	-4.725851	52	-4.825496	52	-4.793334	52	-3.520035	52	-4.712338	52	-4.714346	52	-4.692384	52	-4.713238	52	-4.790342	52	-4.728334	52	-4.793725	52	-4.701128
52.2	-4.825225	52.2	-4.731783	52.2	-4.826043	52.2	-4.899442	52.2	-4.736132	52.2	-4.83456	52.2	-4.802299	52.2	-3.536045	52.2	-4.725801	52.2	-4.721511	52.2	-4.699902	52.2	-4.724345	52.2	-4.794737	52.2	-4.741357	52.2	-4.806139	52.2	-4.709831
52.4	-4.843858	52.4	-4.740643	52.4	-4.828431	52.4	-4.913954	52.4	-4.747993	52.4	-4.848237	52.4	-4.815625	52.4	-3.547532	52.4	-4.737985	52.4	-4.738885	52.4	-4.708785	52.4	-4.735398	52.4	-4.810039	52.4	-4.751057	52.4	-4.817098	52.4	-4.72346
52.6	-4.85569	52.6	-4.753675	52.6	-4.84041	52.6	-4.924744	52.6	-4.76111	52.6	-4.860495	52.6	-4.827098	52.6	-3.559994	52.6	-4.744943	52.6	-4.744322	52.6	-4.72599	52.6	-4.743209	52.6	-4.821714	52.6	-4.76932	52.6	-4.823846	52.6	-4.739251
52.8	-4.866153	52.8	-4.766256	52.8	-4.859682	52.8	-4.939198	52.8	-4.773317	52.8	-4.870176	52.8	-4.844752	52.8	-3.564333	52.8	-4.755676	52.8	-4.758308	52.8	-4.728611	52.8	-4.759172	52.8	-4.832735	52.8	-4.77363	52.8	-4.832441	52.8	-4.746167
53	-4.875444	53	-4.772668	53	-4.865232	53	-4.945249	53	-4.779737	53	-4.877893	53	-4.852646	53	-3.577072	53	-4.765047	53	-4.760745	53	-4.739	53	-4.763491	53	-4.841576	53	-4.782479	53	-4.846984	53	-4.758381
53.2	-4.882852	53.2	-4.785401	53.2	-4.870605	53.2	-4.956196	53.2	-4.790009	53.2	-4.888999	53.2	-4.858871	53.2	-3.588533	53.2	-4.770703	53.2	-4.776698	53.2	-4.755507	53.2	-4.771627	53.2	-4.846474	53.2	-4.793495	53.2	-4.853843	53.2	-4.762675
53.4	-4.888662	53.4	-4.799145	53.4	-4.888259	53.4	-4.967127	53.4	-4.802279	53.4	-4.898307	53.4	-4.873751	53.4	-3.597577	53.4	-4.781108	53.4	-4.783317	53.4	-4.764407	53.4	-4.784313	53.4	-4.855575	53.4	-4.796826	53.4	-4.865641	53.4	-4.769586
53.6	-4.900439	53.6	-4.806476	53.6	-4.891826	53.6	-4.976873	53.6	-4.809684	53.6	-4.90633	53.6	-4.877491	53.6	-3.601244	53.6	-4.787827	53.6	-4.785314	53.6	-4.759663	53.6	-4.784523	53.6	-4.866957	53.6	-4.81031	53.6	-4.86837	53.6	-4.779723
53.8	-4.905915	53.8	-4.806158	53.8	-4.900414	53.8	-4.980433	53.8	-4.819591	53.8	-4.910944	53.8	-4.887727	53.8	-3.606733	53.8	-4.7962	53.8	-4.793993	53.8	-4.775763	53.8	-4.796553	53.8	-4.879065	53.8	-4.81445	53.8	-4.877041	53.8	-4.790822
54	-4.916475	54	-4.821567	54	-4.913847	54	-4.992198	54	-4.823303	54	-4.926463	54	-4.893958	54	-3.615331	54	-4.801934	54	-4.802002	54	-4.782178	54	-4.806329	54	-4.880633	54	-4.825075	54	-4.879438	54	-4.796576
54.2	-4.924986	54.2	-4.82925	54.2	-4.919029	54.2	-4.999884	54.2	-4.83437	54.2	-4.932258	54.2	-4.907589	54.2	-3.621773	54.2	-4.80658	54.2	-4.806313	54.2	-4.783219	54.2	-4.813233	54.2	-4.888697	54.2	-4.834043	54.2	-4.890811	54.2	-4.8071
54.4	-4.933208	54.4	-4.837013	54.4	-4.922129	54.4	-5.005731	54.4	-4.838298	54.4	-4.939528	54.4	-4.916436	54.4	-3.624754	54.4	-4.817835	54.4	-4.813431	54.4	-4.797284	54.4	-4.815937	54.4	-4.890025	54.4	-4.836073	54.4	-4.895295	54.4	-4.809919
54.6	-4.936416	54.6	-4.837839	54.6	-4.926653	54.6	-5.012397	54.6	-4.845272	54.6	-4.943089	54.6	-4.917451	54.6	-3.634503	54.6	-4.816018	54.6	-4.819061	54.6	-4.805592	54.6	-4.821449	54.6	-4.898048	54.6	-4.842743	54.6	-4.90467	54.6	-4.813653
54.8	-4.94059	54.8	-4.84465	54.8	-4.937051	54.8	-5.017992	54.8	-4.849205	54.8	-4.951942	54.8	-4.922925	54.8	-3.639788	54.8	-4.824184	54.8	-4.823123	54.8	-4.801857	54.8	-4.824421	54.8	-4.90068	54.8	-4.844617	54.8	-4.906567	54.8	-4.821216
55	-0.6985005	55	-0.7431279	55	-0.7376466	55	-0.6978319	55	-0.744655	55	-0.7100769	55	-0.6967084	55	-0.572331	55	-0.6944312	55	-0.6760196	55	-0.7013153	55	-0.6732138	55	-0.7069647	55	-0.6770914	55	-0.6780205	55	-0.650613
55.2	-0.6711413	55.2	-0.7112705	55.2	-0.7119282	55.2	-0.6714312	55.2	-0.7176574	55.2	-0.6813992	55.2	-0.6650153	55.2	-0.5497547	55.2	-0.6635104	55.2	-0.6435157	55.2	-0.6682417	55.2	-0.6394204	55.2	-0.6805999	55.2	-0.6436653	55.2	-0.6440114	55.2	-0.6167958
55.4	-0.6504435	55.4	-0.6865634	55.4	-0.6798553	55.4	-0.6469016	55.4	-0.6902431	55.4	-0.6513292	55.4	-0.6429696	55.4	-0.5301965	55.4	-0.6412829	55.4	-0.622321	55.4	-0.6449252	55.4	-0.6054952	55.4	-0.6484065	55.4	-0.6200173	55.4	-0.619343	55.4	-0.5873839
55.6	-0.6295102	55.6	-0.6699905	55.6	-0.6608301	55.6	-0.6287602	55.6	-0.6650139	55.6	-0.6300113	55.6	-0.6245751	55.6	-0.5192284	55.6	-0.6151413	55.6	-0.5975079	55.6	-0.623912	55.6	-0.5878872	55.6	-0.6273991	55.6	-0.5929363	55.6	-0.5928423	55.6	-0.5717967
55.8	-0.6133261	55.8	-0.643903	55.8	-0.6431432	55.8	-0.6042067	55.8	-0.6473544	55.8	-0.609682	55.8	-0.6045941	55.8	-0.5013807	55.8	-0.6068338	55.8	-0.5818217	55.8	-0.6059275	55.8	-0.5726419	55.8	-0.61322	55.8	-0.575553	55.8	-0.5755127	55.8	-0.5558217
56	-0.5987285	56	-0.6367525	56	-0.6268239	56	-0.5947243	56	-0.6377261	56	-0.597215	56	-0.5855425	56	-0.4951446	56	-0.592268	56	-0.5612718	56	-0.5915293	56	-0.5563297	56	-0.5944862	56	-0.5569015	56	-0.561949	56	-0.5363765
56.2	-0.5873678	56.2	-0.6208425	56.2	-0.6133487	56.2	-0.5755976	56.2	-0.6260967	56.2	-0.5815014	56.2	-0.5707281	56.2	-0.4824491	56.2	-0.5761556	56.2	-0.5503751	56.2	-0.5759931	56.2	-0.5403481	56.2	-0.5853135	56.2	-0.5483943	56.2	-0.5493028	56.2	-0.5228271
56.4	-0.5788575	56.4	-0.6051625	56.4	-0.5974632	56.4	-0.5692577	56.4	-0.6060098	56.4	-0.5703231	56.4	-0.563623	56.4	-0.4731461	56.4	-0.5569156	56.4	-0.5407813	56.4	-0.5621322	56.4	-0.5328576	56.4	-0.5649267	56.4	-0.529543	56.4	-0.5335925	56.4	-0.5114806
56.6	-0.5670464	56.6	-0.5972807	56.6	-0.5917441	56.6	-0.5590483	56.6	-0.597073	56.6	-0.5553759	56.6	-0.5539002	56.6	-0.4623644	56.6	-0.5499869	56.6	-0.5267887	56.6	-0.5525501	56.6	-0.5208321	56.6	-0.5539046	56.6	-0.5197967	56.6	-0.5215919	56.6	-0.4978314
56.8	-0.5588024	56.8	-0.5919326	56.8	-0.5824717	56.8	-0.5456634	56.8	-0.5855009	56.8	-0.548722	56.8	-0.5457065	56.8	-0.4575618	56.8	-0.5417422	56.8	-0.5177657	56.8	-0.5410421	56.8	-0.5058653	56.8	-0.5442895	56.8	-0.5136973	56.8	-0.5083739	56.8	-0.4917544
57	-0.5505896	57	-0.5807875	57	-0.5658661	57	-0.5325296	57	-0.5781255	57	-0.5389318	57	-0.5314772	57	-0.4553328	57	-0.5345218	57	-0.5111471	57	-0.5301668	57	-0.4982179	57	-0.5363877	57	-0.5020214	57	-0.5062454	57	-0.4824711
57.2	-0.5382718	57.2	-0.5730127	57.2	-0.5581625	57.2	-0.5211071	57.2	-0.5726657	57.2	-0.5301149	57.2	-0.524326	57.2	-0.4423613	57.2	-0.5351904	57.2	-0.5076656	57.2	-0.5226136	57.2	-0.4924442	57.2	-0.52776	57.2	-0.495422	57.2	-0.4959893	57.2	-0.4749511
57.4	-0.5316451	57.4	-0.5621688	57.4	-0.5564093	57.4	-0.5174405	57.4	-0.5645562	57.4	-0.5191791	57.4	-0.5131573	57.4	-0.434404	57.4	-0.5202299	57.4	-0.4947485	57.4	-0.5164534	57.4	-0.4803778	57.4	-0.5185738	57.4	-0.491068	57.4	-0.4852387	57.4	-0.4659627
57.6	-0.5252096	57.6	-0.5577666	57.6	-0.5482752	57.6	-0.5094684	57.6	-0.55862	57.6	-0.5117829	57.6	-0.5072793	57.6	-0.431508	57.6	-0.5129972	57.6	-0.489134	57.6	-0.5127564	57.6	-0.4762442	57.6	-0.5160631	57.6	-0.478796	57.6	-0.4820416	57.6	-0.4593216
57.8	-0.5215208	57.8	-0.5487325	57.8	-0.5389088	57.8	-0.4999053	57.8	-0.5500204	57.8	-0.4999693	57.8	-0.500286	57.8	-0.4269785	57.8	-0.5066836	57.8	-0.4827183	57.8	-0.4975698	57.8	-0.4636522	57.8	-0.5069913	57.8	-0.4720692	57.8	-0.4762692	57.8	-0.4468051
58	-0.5128916	58	-0.5482287	58	-0.5315155	58	-0.4962495	58	-0.5412707	58	-0.5031707	58	-0.4989199	58	-0.4195835	58	-0.4994273	58	-0.4762167	58	-0.4979053	58	-0.4618634	58	-0.5044827	58	-0.4658988	58	-0.4723305	58	-0.4465463
58.2	-0.5071996	58.2	-0.5396544	58.2	-0.5231032	58.2	-0.4918485	58.2	-0.5337192	58.2	-0.4938475	58.2	-0.4879515	58.2	-0.4163171	58.2	-0.4988269	58.2	-0.4639191	58.2	-0.488128	58.2	-0.4567736	58.2	-0.4922523	58.2	-0.4587538	58.2	-0.4631559	58.2	-0.4408321
58.4	-0.5039812	58.4	-0.5356484	58.4	-0.5226626	58.4	-0.4829804	58.4	-0.5346484	58.4	-0.4833902	58.4	-0.4854985	58.4	-0.4144521	58.4	-0.4906977	58.4	-0.4613176	58.4	-0.4819619	58.4	-0.4520096	58.4	-0.4890162	58.4	-0.4526315	58.4	-0.4551343	58.4	-0.4358926
58.6	-0.4954719	58.6	-0.5318516	58.6	-0.5187423	58.6	-0.479387	58.6	-0.5261244	58.6	-0.4819184	58.6	-0.4805227	58.6	-0.4084171	58.6	-0.4861771	58.6	-0.4590726	58.6	-0.4786543	58.6	-0.440943	58.6	-0.4859034	58.6	-0.4494098	58.6	-0.4538903	58.6	-0.430722
58.8	-0.4920107	58.8	-0.521881	58.8	-0.5104446	58.8	-0.4729796	58.8	-0.522612	58.8	-0.4783458	58.8	-0.4709548	58.8	-0.4094508	58.8	-0.4851791	58.8	-0.4560845	58.8	-0.4706519	58.8	-0.4385306	58.8	-0.4816753	58.8	-0.4454086	58.8	-0.445048	58.8	-0.4240761
59	-0.4886821	59	-0.5155201	59	-0.5065545	59	-0.4652815	59	-0.5223495	59	-0.4711716	59	-0.4682046	59	-0.3995386	59	-0.4745271	59	-0.4431572	59	-0.4679617	59	-0.4334316	59	-0.4726999	59	-0.4414587	59	-0.4409389	59	-0.4200416
59.2	-0.4795	59.2	-0.514128	59.2	-0.5008489	59.2	-0.4659768	59.2	-0.5165814	59.2	-0.4704905	59.2	-0.469561	59.2	-0.401978	59.2	-0.4730918	59.2	-0.4420359	59.2	-0.4644033	59.2	-0.4319763	59.2	-0.4707379	59.2	-0.4333415	59.2	-0.4365836	59.2	-0.4184389
59.4	-0.4795077	59.4	-0.5088438	59.4	-0.4992515	59.4	-0.4605698	59.4	-0.5121737	59.4	-0.4610251	59.4	-0.4611915	59.4	-0.3943485	59.4	-0.464454	59.4	-0.435364	59.4	-0.4645531	59.4	-0.425344	59.4	-0.4674583	59.4	-0.4273509	59.4	-0.4291433	59.4	-0.4124316
59.6	-0.4732013	59.6	-0.5082988	59.6	-0.4934368	59.6	-0.4557231	59.6	-0.5027035	59.6	-0.4552248	59.6	-0.4561729	59.6	-0.3937625	59.6	-0.469477	59.6	-0.4373693	59.6	-0.4560164	59.6	-0.4217133	59.6	-0.4630345	59.6	-0.423444	59.6	-0.4308947	59.6	-0.4110012
59.8	-0.4760669	59.8	-0.5028855	59.8	-0.4935089	59.8	-0.4529138	59.8	-0.5020487	59.8	-0.4519629	59.8	-0.455489	59.8	-0.390156	59.8	-0.463039	59.8	-0.432954	59.8	-0.4545171	59.8	-0.420806	59.8	-0.4603653	59.8	-0.4261436	59.8	-0.4284941	59.8	-0.4063038
60	-0.4202361	60	-0.4613763	60	-0.4465517	60	-0.3987066	60	-0.454145	60	-0.4045698	60	-0.3999321	60	-0.3594118	60	-0.4307595	60	-0.4087476	60	-0.4169349	60	-0.3801089	60	-0.4269437	60	-0.3803722	60	-0.3855208	60	-0.3666852
60.19	-0.4216127	60.19	-0.4539011	60.19	-0.4345562	60.19	-0.3982363	60.19	-0.4521336	60.19	-0.3963197	60.19	-0.3978468	60.19	-0.3525504	60.2	-0.4233018	60.2	-0.409117	60.2	-0.4200498	60.2	-0.3778771	60.2	-0.4240461	60.2	-0.377958	60.2	-0.381608	60.2	-0.3647981
60.39	-0.4165473	60.39	-0.4544537	60.39	-0.4308062	60.39	-0.3927597	60.39	-0.4480138	60.39	-0.4013153	60.39	-0.3924599	60.39	-0.3499515	60.4	-0.4193535	60.4	-0.3979105	60.4	-0.4074867	60.4	-0.376208	60.4	-0.4154198	60.4	-0.3808284	60.4	-0.3810234	60.4	-0.3600134
60.59	-0.414107	60.59	-0.4519027	60.59	-0.4316166	60.59	-0.3841763	60.59	-0.4496574	60.59	-0.3938593	60.59	-0.3906207	60.59	-0.3492185	60.6	-0.4180031	60.6	-0.3912438	60.6	-0.402887	60.6	-0.3760529	60.6	-0.4158516	60.6	-0.376633	60.6	-0.3736253	60.6	-0.3561711
60.79	-0.4097062	60.79	-0.4485332	60.79	-0.4335595	60.79	-0.3857368	60.79	-0.4418644	60.79	-0.3896658	60.79	-0.3877408	60.79	-0.3487555	60.8	-0.4208956	60.8	-0.3900058	60.8	-0.405541	60.8	-0.3703795	60.8	-0.4136288	60.8	-0.3765033	60.8	-0.3715267	60.8	-0.3556684
60.99	-0.4076141	60.99	-0.4484625	60.99	-0.4291549	60.99	-0.3825717	60.99	-0.4368028	60.99	-0.3919448	60.99	-0.3901716	60.99	-0.3460804	61	-0.4146976	61	-0.3938598	61	-0.4025561	61	-0.3720925	61	-0.4128194	61	-0.3705138	61	-0.3698127	61	-0.3554859
61.19	-0.4060648	61.19	-0.4445324	61.19	-0.4218853	61.19	-0.3834733	61.19	-0.4359767	61.19	-0.3899209	61.19	-0.3853857	61.19	-0.34243	61.2	-0.4140382	61.2	-0.3841193	61.2	-0.3983373	61.2	-0.3647093	61.2	-0.4031292	61.2	-0.3721752	61.2	-0.3670902	61.2	-0.3554535
61.39	-0.4029843	61.39	-0.4429637	61.39	-0.4184157	61.39	-0.3774887	61.39	-0.4364628	61.39	-0.3850843	61.39	-0.3802869	61.39	-0.3379003	61.4	-0.4105169	61.4	-0.3807799	61.4	-0.4044888	61.4	-0.3595439	61.4	-0.4037859	61.4	-0.3693902	61.4	-0.3667822	61.4	-0.3493542
61.6	-0.3992377	61.6	-0.4392351	61.6	-0.4186907	61.6	-0.3781013	61.6	-0.4307386	61.6	-0.3850683	61.6	-0.3777271	61.6	-0.3408909	61.6	-0.4129286	61.6	-0.3794994	61.6	-0.4000978	61.6	-0.3618474	61.6	-0.4078191	61.6	-0.3669971	61.6	-0.3664489	61.6	-0.3525085
61.79	-0.400489	61.79	-0.4341638	61.79	-0.4116604	61.79	-0.3753804	61.79	-0.4284414	61.79	-0.3773825	61.79	-0.3789414	61.79	-0.3413832	61.8	-0.4093316	61.8	-0.3773308	61.8	-0.395557	61.8	-0.3602873	61.8	-0.400133	61.8	-0.3647734	61.8	-0.3608508	61.8	-0.3432257
62	-0.3925662	62	-0.4435689	62	-0.4154104	62	-0.3713513	62	-0.4305548	62	-0.3807406	62	-0.3747709	62	-0.3419684	62	-0.4072053	62	-0.3719262	62	-0.3911779	62	-0.3575424	62	-0.4031536	62	-0.3586111	62	-0.3558252	62	-0.3453801
62.19	-0.3946601	62.19	-0.4292218	62.19	-0.4090738	62.19	-0.3694222	62.19	-0.4261137	62.19	-0.3720565	62.19	-0.3699687	62.19	-0.3295841	62.2	-0.4032536	62.2	-0.3700602	62.2	-0.392699	62.2	-0.3582283	62.2	-0.4023778	62.2	-0.3612565	62.2	-0.3595833	62.2	-0.3379081
62.39	-0.3897069	62.39	-0.431501	62.39	-0.4107448	62.39	-0.3653683	62.39	-0.4259765	62.39	-0.3751836	62.39	-0.3737047	62.39	-0.3356039	62.4	-0.3979961	62.4	-0.3690136	62.4	-0.3891498	62.4	-0.3570372	62.4	-0.3974696	62.4	-0.359412	62.4	-0.3565921	62.4	-0.3439665
62.59	-0.388527	62.59	-0.426557	62.59	-0.4081304	62.59	-0.3659045	62.59	-0.4207678	62.59	-0.3725161	62.59	-0.3658266	62.59	-0.3338427	62.6	-0.3980603	62.6	-0.3674469	62.6	-0.3903834	62.6	-0.3510735	62.6	-0.3962141	62.6	-0.3599529	62.6	-0.3570357	62.6	-0.3386024
62.79	-0.3913042	62.79	-0.4257092	62.79	-0.4080559	62.79	-0.3655696	62.79	-0.4165018	62.79	-0.3725429	62.79	-0.3651477	62.79	-0.3307848	62.8	-0.3996476	62.8	-0.3660795	62.8	-0.3876985	62.8	-0.3554676	62.8	-0.3940494	62.8	-0.3559524	62.8	-0.35555	62.8	-0.3424752
62.99	-0.3864718	62.99	-0.4217886	62.99	-0.4043258	62.99	-0.358792	62.99	-0.4256534	62.99	-0.3743382	62.99	-0.3681369	62.99	-0.3330817	63	-0.3977279	63	-0.3648913	63	-0.3816218	63	-0.3539818	63	-0.392647	63	-0.3551147	63	-0.3543282	63	-0.3336433
63.19	-0.3878154	63.19	-0.4211455	63.19	-0.4048636	63.19	-0.3592833	63.19	-0.416544	63.19	-0.3657316	63.19	-0.3620886	63.19	-0.3283626	63.2	-0.3917394	63.2	-0.3625836	63.2	-0.3898012	63.2	-0.3518748	63.2	-0.3919983	63.2	-0.3559739	63.2	-0.3503424	63.2	-0.3356821
63.39	-0.384947	63.39	-0.4205144	63.39	-0.4029396	63.39	-0.3551107	63.39	-0.4077143	63.39	-0.3693015	63.39	-0.3626869	63.39	-0.3258909	63.4	-0.3906449	63.4	-0.3575931	63.4	-0.3792304	63.4	-0.3520436	63.4	-0.3910135	63.4	-0.3538363	63.4	-0.3514746	63.4	-0.3321025
63.59	-0.3810203	63.59	-0.4161193	63.59	-0.3959465	63.59	-0.3547417	63.59	-0.4159416	63.59	-0.3629797	63.59	-0.3563676	63.59	-0.3263207	63.6	-0.3962133	63.6	-0.3600905	63.6	-0.3826208	63.6	-0.3494604	63.6	-0.3857693	63.6	-0.3542695	63.6	-0.3452075	63.6	-0.3324027
63.79	-0.3831773	63.79	-0.420552	63.79	-0.3980514	63.79	-0.3559883	63.79	-0.4125644	63.79	-0.3621481	63.79	-0.3585956	63.79	-0.3280111	63.81	-0.3922196	63.81	-0.3571363	63.81	-0.3807461	63.81	-0.3489114	63.81	-0.3862151	63.81	-0.3488536	63.81	-0.3474279	63.81	-0.3290056
63.99	-0.384092	63.99	-0.4201992	63.99	-0.394875	63.99	-0.3523116	63.99	-0.410945	63.99	-0.3581362	63.99	-0.3531343	63.99	-0.3211117	64	-0.390422	64	-0.3567057	64	-0.3739109	64	-0.3456627	64	-0.3827035	64	-0.3496003	64	-0.3461881	64	-0.3315068
64.2	-0.3794961	64.2	-0.4138767	64.2	-0.3930484	64.2	-0.3515221	64.2	-0.4038725	64.2	-0.358452	64.2	-0.3563194	64.2	-0.3214243	64.2	-0.3899367	64.2	-0.3493135	64.2	-0.3773526	64.2	-0.3413241	64.2	-0.3861033	64.2	-0.3462887	64.2	-0.3451634	64.2	-0.3269237
64.39	-0.3765888	64.39	-0.4105469	64.39	-0.3919748	64.39	-0.3507066	64.39	-0.4091598	64.39	-0.354756	64.39	-0.3545645	64.39	-0.32407	64.4	-0.3867468	64.4	-0.3533515	64.4	-0.3799223	64.4	-0.3442326	64.4	-0.3810101	64.4	-0.3429681	64.4	-0.3456061	64.4	-0.324056
64.59	-0.3764623	64.59	-0.4130943	64.59	-0.3901896	64.59	-0.349717	64.59	-0.4090674	64.59	-0.3578836	64.59	-0.3490131	64.59	-0.3169441	64.6	-0.3887454	64.6	-0.3500342	64.6	-0.3739876	64.6	-0.3410244	64.6	-0.3763672	64.6	-0.3463355	64.6	-0.3403885	64.6	-0.3280989
64.79	-0.3714057	64.79	-0.4083107	64.79	-0.3927712	64.79	-0.3479024	64.79	-0.4020204	64.79	-0.3562757	64.79	-0.3469102	64.79	-0.3191872	64.8	-0.3825365	64.8	-0.3504055	64.8	-0.3749795	64.8	-0.335694	64.8	-0.3803713	64.8	-0.3438967	64.8	-0.339571	64.8	-0.3222234
64.99	-0.3711649	64.99	-0.4100468	64.99	-0.3908862	64.99	-0.3435508	64.99	-0.4036176	64.99	-0.3544587	64.99	-0.3495714	64.99	-0.313289	65	-0.3787064	65	-0.346982	65	-0.3758621	65	-0.3347125	65	-0.3769959	65	-0.3393573	65	-0.3376592	65	-0.3203037
65.19	-0.3704366	65.19	-0.4044416	65.19	-0.3801813	65.19	-0.3450454	65.19	-0.402752	65.19	-0.3485565	65.19	-0.3468105	65.19	-0.3156615	65.2	-0.3881791	65.2	-0.3516606	65.2	-0.3734896	65.2	-0.3356771	65.2	-0.3750462	65.2	-0.3406782	65.2	-0.3376277	65.2	-0.3147598
65.39	-0.3728866	65.39	-0.408696	65.39	-0.3875897	65.39	-0.3412082	65.39	-0.39679	65.39	-0.3486642	65.39	-0.3435275	65.39	-0.3118061	65.4	-0.3828522	65.4	-0.3459125	65.4	-0.3716161	65.4	-0.334361	65.4	-0.3770514	65.4	-0.3368658	65.4	-0.3371534	65.4	-0.3182924
65.59	-0.3636846	65.59	-0.4012648	65.59	-0.3824886	65.59	-0.3371776	65.59	-0.3968941	65.59	-0.3477364	65.59	-0.3395949	65.59	-0.3147911	65.6	-0.3779234	65.6	-0.3444088	65.6	-0.3688696	65.6	-0.3349666	65.6	-0.3690453	65.6	-0.3353005	65.6	-0.333493	65.6	-0.3218234
65.79	-0.3660159	65.79	-0.4068421	65.79	-0.3836587	65.79	-0.3361004	65.79	-0.3950518	65.79	-0.3460998	65.79	-0.3438561	65.79	-0.3136962	65.8	-0.3744536	65.8	-0.3455001	65.8	-0.3672561	65.8	-0.3273462	65.8	-0.3740326	65.8	-0.3388121	65.8	-0.3371449	65.8	-0.3194518
65.99	-0.3643142	65.99	-0.4015672	65.99	-0.3794272	65.99	-0.3313218	65.99	-0.3939727	65.99	-0.3465821	65.99	-0.3383777	65.99	-0.3117598	66	-0.3751731	66	-0.3450662	66	-0.3623172	66	-0.330177	66	-0.373362	66	-0.3346262	66	-0.3310151	66	-0.3143981
66.2	-0.362952	66.2	-0.3975767	66.2	-0.3830695	66.2	-0.3336727	66.2	-0.3948924	66.2	-0.3398981	66.2	-0.3430229	66.2	-0.3054758	66.2	-0.3744828	66.2	-0.3401915	66.2	-0.3712144	66.2	-0.3272525	66.2	-0.3704099	66.2	-0.3329462	66.2	-0.3294799	66.2	-0.3144072
66.39	-0.3587717	66.39	-0.3985099	66.39	-0.3785834	66.39	-0.3284245	66.39	-0.3901734	66.39	-0.3446453	66.39	-0.340576	66.39	-0.3067781	66.4	-0.3761235	66.4	-0.3414709	66.4	-0.3633822	66.4	-0.3278985	66.4	-0.3698567	66.4	-0.3347966	66.4	-0.3256448	66.4	-0.3187629
66.6	-0.3640294	66.6	-0.3932329	66.6	-0.3772525	66.6	-0.3307851	66.6	-0.3903109	66.6	-0.3408023	66.6	-0.3356729	66.6	-0.3067976	66.6	-0.3734553	66.6	-0.3405212	66.6	-0.3616219	66.6	-0.3269484	66.6	-0.3741229	66.6	-0.3298534	66.6	-0.3257745	66.6	-0.3106181
66.79	-0.3644666	66.79	-0.3970506	66.79	-0.3780018	66.79	-0.3304803	66.79	-0.3870228	66.79	-0.3401528	66.79	-0.3359701	66.79	-0.3035758	66.8	-0.3684389	66.8	-0.3374338	66.8	-0.3608999	66.8	-0.3276874	66.8	-0.3668579	66.8	-0.3286811	66.8	-0.3240434	66.8	-0.3124469
67	-0.3612819	67	-0.3969845	67	-0.3714528	67	-0.3325877	67	-0.3887834	67	-0.3345626	67	-0.3364277	67	-0.3058397	67	-0.3677547	67	-0.3367318	67	-0.3624909	67	-0.3266795	67	-0.365676	67	-0.3288938	67	-0.3270166	67	-0.3061586
67.2	-0.3536195	67.2	-0.3897211	67.2	-0.3675007	67.2	-0.3266192	67.2	-0.3871494	67.2	-0.3349339	67.2	-0.331846	67.2	-0.3051454	67.2	-0.3669728	67.2	-0.3356416	67.2	-0.3585499	67.2	-0.3247688	67.2	-0.3603351	67.2	-0.3274258	67.2	-0.3266933	67.2	-0.3110208
67.39	-0.3580685	67.39	-0.389736	67.39	-0.3708085	67.39	-0.3243424	67.39	-0.3860988	67.39	-0.3358527	67.39	-0.327824	67.39	-0.3012882	67.4	-0.36797	67.4	-0.334742	67.4	-0.3619417	67.4	-0.3176776	67.4	-0.3647968	67.4	-0.3272045	67.4	-0.3228335	67.4	-0.3089811
67.59	-0.3536924	67.59	-0.3953289	67.59	-0.3658838	67.59	-0.3212491	67.59	-0.3868978	67.59	-0.3313858	67.59	-0.3307631	67.59	-0.2989509	67.6	-0.3650041	67.6	-0.3329427	67.6	-0.3605804	67.6	-0.3251342	67.6	-0.356854	67.6	-0.3261209	67.6	-0.3249894	67.6	-0.3048086
67.8	-0.356911	67.8	-0.3914293	67.8	-0.3690391	67.8	-0.3266837	67.8	-0.3822498	67.8	-0.3307907	67.8	-0.3256513	67.8	-0.3033693	67.8	-0.3646477	67.8	-0.3261148	67.8	-0.3563273	67.8	-0.3239465	67.8	-0.3617271	67.8	-0.323929	67.8	-0.3214483	67.8	-0.3051518
67.99	-0.3498416	67.99	-0.39162	67.99	-0.3622971	67.99	-0.3200452	67.99	-0.3784235	67.99	-0.3336703	67.99	-0.3278919	67.99	-0.2935169	68	-0.3666774	68	-0.3290679	68	-0.3582637	68	-0.3176457	68	-0.3615995	68	-0.3207118	68	-0.3213112	68	-0.3043564
68.2	-0.3529026	68.2	-0.3864852	68.2	-0.3649881	68.2	-0.3176571	68.2	-0.3786049	68.2	-0.3298225	68.2	-0.3212436	68.2	-0.2972197	68.21	-0.3620954	68.21	-0.329026	68.21	-0.3506821	68.21	-0.319011	68.21	-0.3606685	68.21	-0.3204334	68.21	-0.3216924	68.21	-0.3051301
68.39	-0.3491976	68.39	-0.3866362	68.39	-0.3626522	68.39	-0.3202732	68.39	-0.3813132	68.39	-0.321835	68.39	-0.3263734	68.39	-0.3001672	68.4	-0.3656603	68.4	-0.326129	68.4	-0.3503771	68.4	-0.3138783	68.4	-0.3568965	68.4	-0.3207221	68.4	-0.317618	68.4	-0.3047514
68.59	-0.3493483	68.59	-0.385672	68.59	-0.3640145	68.59	-0.3155689	68.59	-0.378706	68.59	-0.3284875	68.59	-0.3205302	68.59	-0.2985215	68.6	-0.3652227	68.6	-0.3235185	68.6	-0.351857	68.6	-0.3152284	68.6	-0.3561814	68.6	-0.3181166	68.6	-0.3148023	68.6	-0.3036664
68.79	-0.3468402	68.79	-0.3820914	68.79	-0.3573513	68.79	-0.3160002	68.79	-0.3785783	68.79	-0.3274302	68.79	-0.3196868	68.79	-0.2981372	68.8	-0.3583472	68.8	-0.3194921	68.8	-0.3509212	68.8	-0.3169121	68.8	-0.3567522	68.8	-0.315768	68.8	-0.3160585	68.8	-0.3010896
69	-0.3457625	69	-0.3803028	69	-0.3611645	69	-0.3161559	69	-0.3731542	69	-0.3208963	69	-0.3206694	69	-0.3002091	69	-0.3581035	69	-0.319809	69	-0.3499286	69	-0.3152375	69	-0.3570033	69	-0.3192098	69	-0.3129596	69	-0.298604
69.2	-0.3439826	69.2	-0.3791712	69.2	-0.3620748	69.2	-0.317274	69.2	-0.3689062	69.2	-0.3254051	69.2	-0.3184882	69.2	-0.2944991	69.2	-0.3581909	69.2	-0.3292575	69.2	-0.3529974	69.2	-0.3145017	69.2	-0.3556291	69.2	-0.3163046	69.2	-0.316804	69.2	-0.2981473
69.4	-0.3404175	69.4	-0.3782651	69.4	-0.359061	69.4	-0.3124202	69.4	-0.3709298	69.4	-0.321154	69.4	-0.3199452	69.4	-0.2904999	69.4	-0.3591053	69.4	-0.3268396	69.4	-0.3483309	69.4	-0.306448	69.4	-0.3530817	69.4	-0.3183369	69.4	-0.3161304	69.4	-0.2988888
69.6	-0.3433921	69.6	-0.3800844	69.6	-0.3573686	69.6	-0.3094671	69.6	-0.3744003	69.6	-0.3219989	69.6	-0.3121543	69.6	-0.2942094	69.6	-0.3593658	69.6	-0.3210384	69.6	-0.3491784	69.6	-0.3132074	69.6	-0.3518727	69.6	-0.3154952	69.6	-0.3113402	69.6	-0.292889
69.8	-0.3405813	69.8	-0.3787725	69.8	-0.3561377	69.8	-0.3080711	69.8	-0.3741545	69.8	-0.3203797	69.8	-0.3167529	69.8	-0.2925509	69.8	-0.3572929	69.8	-0.3175001	69.8	-0.344071	69.8	-0.3101912	69.8	-0.3457741	69.8	-0.3139932	69.8	-0.3123413	69.8	-0.2954597
70	-0.3407795	70	-0.3811641	70	-0.3565175	70	-0.3106223	70	-0.3671873	70	-0.3205282	70	-0.3162973	70	-0.2918599	70	-0.3576775	70	-0.3166584	70	-0.3408311	70	-0.3119374	70	-0.3536465	70	-0.3140739	70	-0.3111363	70	-0.2975315
70.2	-0.3437862	70.2	-0.3793564	70.2	-0.352335	70.2	-0.3076009	70.2	-0.3642626	70.2	-0.3158663	70.2	-0.3158289	70.2	-0.2948823	70.2	-0.3538321	70.2	-0.3216653	70.2	-0.3439622	70.2	-0.3089861	70.2	-0.3484287	70.2	-0.3112741	70.2	-0.307226	70.2	-0.29177
70.4	-0.3376741	70.4	-0.3742716	70.4	-0.3532008	70.4	-0.3099628	70.4	-0.3690718	70.4	-0.3177163	70.4	-0.3104881	70.4	-0.2885789	70.4	-0.3562208	70.4	-0.3151062	70.4	-0.3431942	70.4	-0.3070656	70.4	-0.346608	70.4	-0.3084828	70.4	-0.3125345	70.4	-0.2939278
70.6	-0.3349546	70.6	-0.378362	70.6	-0.3500303	70.6	-0.3084065	70.6	-0.3638164	70.6	-0.3146507	70.6	-0.3105434	70.6	-0.2903256	70.6	-0.350424	70.6	-0.3197464	70.6	-0.3437514	70.6	-0.3059554	70.6	-0.3476321	70.6	-0.3158797	70.6	-0.3093937	70.6	-0.29172
70.8	-0.3400159	70.8	-0.3744562	70.8	-0.3498401	70.8	-0.3026302	70.8	-0.3659042	70.8	-0.3146251	70.8	-0.3111387	70.8	-0.2957043	70.8	-0.3508971	70.8	-0.3140004	70.8	-0.342507	70.8	-0.3071369	70.8	-0.3513883	70.8	-0.3084746	70.8	-0.3091479	70.8	-0.2906822
71	-0.3366707	71	-0.3697173	71	-0.3482474	71	-0.3055131	71	-0.3642811	71	-0.3116985	71	-0.3075641	71	-0.2871349	71	-0.3524676	71	-0.3132881	71	-0.3419062	71	-0.3026063	71	-0.3439176	71	-0.3055301	71	-0.3086662	71	-0.2870321
71.2	-0.3358842	71.2	-0.3692448	71.2	-0.3469162	71.2	-0.3080104	71.2	-0.3613672	71.2	-0.3135466	71.2	-0.3089986	71.2	-0.2900615	71.2	-0.3470402	71.2	-0.3146291	71.2	-0.3352731	71.2	-0.3039004	71.2	-0.3434623	71.2	-0.3083708	71.2	-0.3035779	71.2	-0.2909559
71.4	-0.3371066	71.4	-0.3743424	71.4	-0.3442027	71.4	-0.295335	71.4	-0.3625739	71.4	-0.3105596	71.4	-0.3071094	71.4	-0.2892978	71.4	-0.3504793	71.4	-0.3120733	71.4	-0.3399034	71.4	-0.3035532	71.4	-0.3358081	71.4	-0.3067888	71.4	-0.3052911	71.4	-0.2842486
71.6	-0.3323427	71.6	-0.3661485	71.6	-0.3487493	71.6	-0.2965763	71.6	-0.3631124	71.6	-0.3120759	71.6	-0.3049532	71.6	-0.2784923	71.6	-0.3478107	71.6	-0.3113922	71.6	-0.3393018	71.6	-0.3009856	71.6	-0.3425402	71.6	-0.3032987	71.6	-0.3005653	71.6	-0.283356
71.8	-0.3326432	71.8	-0.3667871	71.8	-0.3463698	71.8	-0.2968798	71.8	-0.358586	71.8	-0.3105024	71.8	-0.3005719	71.8	-0.2818131	71.8	-0.3470016	71.8	-0.3084374	71.8	-0.3363566	71.8	-0.3024051	71.8	-0.3419172	71.8	-0.3080796	71.8	-0.3046662	71.8	-0.2873392
72	-0.3306924	72	-0.3619313	72	-0.34249	72	-0.2986257	72	-0.3597744	72	-0.308862	72	-0.303703	72	-0.2803541	72	-0.3480079	72	-0.3110653	72	-0.3321711	72	-0.3008932	72	-0.3398031	72	-0.304632	72	-0.2973913	72	-0.2889636
72.2	-0.3331695	72.2	-0.3638845	72.2	-0.3485333	72.2	-0.2985619	72.2	-0.3596181	72.2	-0.3095623	72.2	-0.3058797	72.2	-0.2800941	72.2	-0.3452398	72.2	-0.3122573	72.2	-0.3391013	72.2	-0.2992502	72.2	-0.3384144	72.2	-0.3027716	72.2	-0.2999808	72.2	-0.2830898
72.4	-0.3334908	72.4	-0.3662715	72.4	-0.3414441	72.4	-0.2938038	72.4	-0.3571281	72.4	-0.3078342	72.4	-0.3031565	72.4	-0.2796516	72.4	-0.346723	72.4	-0.3119934	72.4	-0.3369713	72.4	-0.2978095	72.4	-0.3377999	72.4	-0.3029516	72.4	-0.2970951	72.4	-0.2848478
72.59	-0.3232648	72.59	-0.3625682	72.59	-0.3406536	72.59	-0.292851	72.59	-0.3573837	72.59	-0.3058531	72.59	-0.2965949	72.59	-0.28236	72.6	-0.3394532	72.6	-0.3099765	72.6	-0.3329478	72.6	-0.3023676	72.6	-0.3373188	72.6	-0.2994733	72.6	-0.2943756	72.6	-0.2840816
72.8	-0.3285082	72.8	-0.3607652	72.8	-0.3354655	72.8	-0.294314	72.8	-0.3561178	72.8	-0.3064382	72.8	-0.2991861	72.8	-0.2765509	72.8	-0.343295	72.8	-0.3046993	72.8	-0.3348796	72.8	-0.2955526	72.8	-0.3336062	72.8	-0.2957381	72.8	-0.2944158	72.8	-0.2847382
73	-0.3287477	73	-0.3670816	73	-0.338645	73	-0.2929978	73	-0.3520572	73	-0.3071218	73	-0.2989756	73	-0.2798272	73	-0.3416264	73	-0.3052364	73	-0.3305147	73	-0.2943285	73	-0.3365438	73	-0.2976473	73	-0.2953919	73	-0.2780698
73.2	-0.3255192	73.2	-0.3611509	73.2	-0.337695	73.2	-0.2915335	73.2	-0.3548165	73.2	-0.3031231	73.2	-0.2995782	73.2	-0.2773585	73.2	-0.3438284	73.2	-0.3079447	73.2	-0.3302369	73.2	-0.2879836	73.2	-0.3321476	73.2	-0.2950749	73.2	-0.2938801	73.2	-0.2816378
73.4	-0.3177926	73.4	-0.360043	73.4	-0.3322386	73.4	-0.2895294	73.4	-0.3527659	73.4	-0.3063522	73.4	-0.2955031	73.4	-0.2783542	73.4	-0.3390738	73.4	-0.3046174	73.4	-0.3303867	73.4	-0.2919435	73.4	-0.3309924	73.4	-0.2973472	73.4	-0.2909839	73.4	-0.2752489
73.6	-0.3237986	73.6	-0.3633204	73.6	-0.3355875	73.6	-0.2917729	73.6	-0.3511605	73.6	-0.300797	73.6	-0.2931612	73.6	-0.2750998	73.6	-0.342709	73.6	-0.2957083	73.6	-0.3301361	73.6	-0.2944922	73.6	-0.3340673	73.6	-0.296403	73.6	-0.2938454	73.6	-0.2811091
73.79	-0.3198899	73.79	-0.3586768	73.79	-0.3318377	73.79	-0.2911022	73.79	-0.3499438	73.79	-0.2964503	73.79	-0.292393	73.79	-0.2770653	73.8	-0.3339959	73.8	-0.3021199	73.8	-0.3346178	73.8	-0.2919424	73.8	-0.3341768	73.8	-0.2952421	73.8	-0.2898592	73.8	-0.2781532
74	-0.320807	74	-0.3570089	74	-0.332045	74	-0.2826813	74	-0.3488242	74	-0.2990856	74	-0.294175	74	-0.2730048	74	-0.3380948	74	-0.2982825	74	-0.3288155	74	-0.2886272	74	-0.3288035	74	-0.2942082	74	-0.2948658	74	-0.281759
74.2	-0.3201215	74.2	-0.3566036	74.2	-0.3344648	74.2	-0.2875288	74.2	-0.3502664	74.2	-0.2942244	74.2	-0.2967656	74.2	-0.2753921	74.2	-0.3373505	74.2	-0.2969664	74.2	-0.3255571	74.2	-0.2867844	74.2	-0.3317369	74.2	-0.2939835	74.2	-0.2940081	74.2	-0.2735153
74.4	-0.3152896	74.4	-0.3544165	74.4	-0.3342714	74.4	-0.2841558	74.4	-0.3416032	74.4	-0.2983049	74.4	-0.2882936	74.4	-0.2749563	74.4	-0.3401262	74.4	-0.3031611	74.4	-0.3223247	74.4	-0.2910204	74.4	-0.3273858	74.4	-0.2927302	74.4	-0.2902138	74.4	-0.2734584
74.6	-0.3204572	74.6	-0.355309	74.6	-0.3315399	74.6	-0.2850191	74.6	-0.3511645	74.6	-0.2953112	74.6	-0.2879875	74.6	-0.2751198	74.6	-0.3342978	74.6	-0.3000057	74.6	-0.3274126	74.6	-0.2853292	74.6	-0.3283284	74.6	-0.2932505	74.6	-0.2899848	74.6	-0.2754089
74.8	-0.3173353	74.8	-0.3556936	74.8	-0.3358466	74.8	-0.2862769	74.8	-0.3442358	74.8	-0.2984549	74.8	-0.2904666	74.8	-0.2753174	74.8	-0.3332902	74.8	-0.2985559	74.8	-0.3253402	74.8	-0.2901235	74.8	-0.3281583	74.8	-0.2892646	74.8	-0.2909079	74.8	-0.2719231
75	-0.3199754	75	-0.3529536	75	-0.3290689	75	-0.2857103	75	-0.3439583	75	-0.2924472	75	-0.2910881	75	-0.2679935	75	-0.33404	75	-0.2952139	75	-0.3240906	75	-0.2894912	75	-0.3241938	75	-0.2929588	75	-0.2878361	75	-0.2772831
75.2	-0.3145166	75.2	-0.3522556	75.2	-0.3273326	75.2	-0.278128	75.2	-0.3435778	75.2	-0.2975812	75.2	-0.2882241	75.2	-0.2672717	75.2	-0.3329808	75.2	-0.294993	75.2	-0.3220891	75.2	-0.288138	75.2	-0.3216986	75.2	-0.2885331	75.2	-0.288605	75.2	-0.2726586
75.4	-0.3172185	75.4	-0.3519005	75.4	-0.3277332	75.4	-0.28083	75.4	-0.342086	75.4	-0.2924904	75.4	-0.2879424	75.4	-0.2637084	75.4	-0.335926	75.4	-0.2952244	75.4	-0.3231957	75.4	-0.2878328	75.4	-0.3240273	75.4	-0.2889858	75.4	-0.2896333	75.4	-0.2707694
75.6	-0.3150067	75.6	-0.3507359	75.6	-0.32905	75.6	-0.2814056	75.6	-0.3437905	75.6	-0.2922048	75.6	-0.2880898	75.6	-0.2694865	75.6	-0.3343315	75.6	-0.2960066	75.6	-0.3217131	75.6	-0.2854329	75.6	-0.3300944	75.6	-0.2904186	75.6	-0.2815836	75.6	-0.2714859
75.8	-0.3156054	75.8	-0.3542415	75.8	-0.3265755	75.8	-0.2770288	75.8	-0.3437916	75.8	-0.290729	75.8	-0.2904768	75.8	-0.2716497	75.8	-0.327956	75.8	-0.2937885	75.8	-0.3198567	75.8	-0.2821481	75.8	-0.3247303	75.8	-0.2877052	75.8	-0.2856793	75.8	-0.2714111
76	-0.3127971	76	-0.352176	76	-0.3343914	76	-0.2785529	76	-0.3387325	76	-0.284739	76	-0.287646	76	-0.2688397	76	-0.329561	76	-0.2945083	76	-0.3184884	76	-0.2844953	76	-0.3244655	76	-0.2867537	76	-0.2816423	76	-0.2677909
76.2	-0.3163203	76.2	-0.3519708	76.2	-0.3257079	76.2	-0.2751296	76.2	-0.3371946	76.2	-0.2891916	76.2	-0.2879295	76.2	-0.2715067	76.2	-0.3247843	76.2	-0.2954562	76.2	-0.3240609	76.2	-0.2829174	76.2	-0.3256013	76.2	-0.2883577	76.2	-0.2812518	76.2	-0.2705524
76.4	-0.3136832	76.4	-0.3496926	76.4	-0.3231276	76.4	-0.2748072	76.4	-0.3372341	76.4	-0.2928489	76.4	-0.2837821	76.4	-0.2698244	76.4	-0.3278186	76.4	-0.2919713	76.4	-0.3222439	76.4	-0.2782657	76.4	-0.3193311	76.4	-0.2842813	76.4	-0.2840699	76.4	-0.2699274
76.6	-0.3098934	76.6	-0.347426	76.6	-0.3220491	76.6	-0.2779614	76.6	-0.3350336	76.6	-0.2865706	76.6	-0.2893748	76.6	-0.2675684	76.6	-0.3257575	76.6	-0.2893102	76.6	-0.3200772	76.6	-0.2861918	76.6	-0.3186062	76.6	-0.2853085	76.6	-0.279825	76.6	-0.2622133
76.8	-0.3118401	76.8	-0.3466089	76.8	-0.3208453	76.8	-0.2792585	76.8	-0.3354082	76.8	-0.2873915	76.8	-0.2851889	76.8	-0.2654629	76.8	-0.330462	76.8	-0.2902669	76.8	-0.316023	76.8	-0.2797083	76.8	-0.3143678	76.8	-0.2808417	76.8	-0.2810912	76.8	-0.2654859
77	-0.3070494	77	-0.349411	77	-0.319626	77	-0.2720807	77	-0.3304495	77	-0.2893834	77	-0.2795763	77	-0.2614088	77	-0.3286619	77	-0.2887093	77	-0.3160129	77	-0.282518	77	-0.3199828	77	-0.2855727	77	-0.2825169	77	-0.270776
77.2	-0.3102646	77.2	-0.3424553	77.2	-0.31587	77.2	-0.2706901	77.2	-0.3319797	77.2	-0.2859076	77.2	-0.2867637	77.2	-0.2666113	77.2	-0.3220552	77.2	-0.2881767	77.2	-0.3209559	77.2	-0.2806374	77.2	-0.3213586	77.2	-0.2850959	77.2	-0.2824384	77.2	-0.2656236
77.4	-0.3012941	77.4	-0.3453001	77.4	-0.3212422	77.4	-0.2738798	77.4	-0.3358922	77.4	-0.282602	77.4	-0.279322	77.4	-0.2698862	77.4	-0.3248248	77.4	-0.2901398	77.4	-0.3188082	77.4	-0.2730877	77.4	-0.3152284	77.4	-0.2841609	77.4	-0.2804669	77.4	-0.2623226
77.6	-0.3059655	77.6	-0.342227	77.6	-0.3215468	77.6	-0.2718461	77.6	-0.3367195	77.6	-0.2823193	77.6	-0.2786513	77.6	-0.2651991	77.6	-0.3270699	77.6	-0.2863671	77.6	-0.3128933	77.6	-0.2766936	77.6	-0.3171066	77.6	-0.278381	77.6	-0.2782291	77.6	-0.2625589
77.8	-0.3073817	77.8	-0.3459058	77.8	-0.3196307	77.8	-0.2710948	77.8	-0.3356077	77.8	-0.2859974	77.8	-0.2781336	77.8	-0.2627538	77.8	-0.3205805	77.8	-0.2811486	77.8	-0.3115475	77.8	-0.277582	77.8	-0.3131615	77.8	-0.2812814	77.8	-0.2807364	77.8	-0.2617334
78	-0.2997344	78	-0.343475	78	-0.3162517	78	-0.2696478	78	-0.3292762	78	-0.2799829	78	-0.2765888	78	-0.2573006	78	-0.3235353	78	-0.2874064	78	-0.3128749	78	-0.2807561	78	-0.3174492	78	-0.2801122	78	-0.2798148	78	-0.2645807
78.2	-0.3053749	78.2	-0.3446674	78.2	-0.3131292	78.2	-0.2701618	78.2	-0.3289088	78.2	-0.2812135	78.2	-0.279376	78.2	-0.2592909	78.2	-0.3237427	78.2	-0.2878135	78.2	-0.3130572	78.2	-0.2749394	78.2	-0.3135524	78.2	-0.2796485	78.2	-0.2770672	78.2	-0.2606297
78.4	-0.3055758	78.4	-0.3387331	78.4	-0.3125376	78.4	-0.2674153	78.4	-0.3304505	78.4	-0.278735	78.4	-0.272644	78.4	-0.2551836	78.4	-0.3231569	78.4	-0.2838722	78.4	-0.3115345	78.4	-0.2756567	78.4	-0.3186771	78.4	-0.2807554	78.4	-0.2739233	78.4	-0.2653562
78.6	-0.3015212	78.6	-0.341693	78.6	-0.3158692	78.6	-0.2626798	78.6	-0.3306779	78.6	-0.2809558	78.6	-0.2768502	78.6	-0.2643716	78.6	-0.3224973	78.6	-0.2847979	78.6	-0.3118785	78.6	-0.2728437	78.6	-0.3095109	78.6	-0.2769747	78.6	-0.2729304	78.6	-0.2614536
78.79	-0.2999087	78.79	-0.3424197	78.79	-0.3176233	78.79	-0.2683362	78.79	-0.3313929	78.79	-0.2784259	78.79	-0.2740993	78.79	-0.2597142	78.8	-0.3243622	78.8	-0.2853068	78.8	-0.3045525	78.8	-0.267731	78.8	-0.3140016	78.8	-0.2788153	78.8	-0.2749107	78.8	-0.2556812
79	-0.2985091	79	-0.3370208	79	-0.3109915	79	-0.2682989	79	-0.3296931	79	-0.2811359	79	-0.2698274	79	-0.2622767	79	-0.322028	79	-0.2828681	79	-0.3109179	79	-0.2734394	79	-0.3111367	79	-0.2750414	79	-0.2756749	79	-0.2583045
79.2	-0.3022794	79.2	-0.339578	79.2	-0.3132838	79.2	-0.2634077	79.2	-0.3261886	79.2	-0.2752621	79.2	-0.2756298	79.2	-0.2560956	79.2	-0.3186793	79.2	-0.2778683	79.2	-0.31033	79.2	-0.2740241	79.2	-0.3094328	79.2	-0.275752	79.2	-0.2767059	79.2	-0.2612792
79.4	-0.3000089	79.4	-0.3396032	79.4	-0.3121932	79.4	-0.2627878	79.4	-0.3284657	79.4	-0.2748756	79.4	-0.2713729	79.4	-0.2582382	79.4	-0.3204865	79.4	-0.2826664	79.4	-0.3087361	79.4	-0.2714259	79.4	-0.3100727	79.4	-0.2771053	79.4	-0.2690643	79.4	-0.2534625
79.59	-0.301203	79.59	-0.3390009	79.59	-0.3152429	79.59	-0.2637505	79.59	-0.3208042	79.59	-0.27676	79.59	-0.2704214	79.59	-0.2587223	79.6	-0.3162507	79.6	-0.2835262	79.6	-0.3062719	79.6	-0.2742008	79.6	-0.3164264	79.6	-0.2752605	79.6	-0.268803	79.6	-0.2555972
79.8	-0.2991146	79.8	-0.3398923	79.8	-0.3082421	79.8	-0.2623771	79.8	-0.3292749	79.8	-0.2740999	79.8	-0.2723989	79.8	-0.2551789	79.8	-0.3153883	79.8	-0.2779701	79.8	-0.3038292	79.8	-0.2690377	79.8	-0.309808	79.8	-0.272459	79.8	-0.2724093	79.8	-0.2544287
80	-0.2975343	80	-0.3379372	80	-0.3086616	80	-0.2601799	80	-0.322907	80	-0.2718142	80	-0.2664973	80	-0.2492119	80	-0.316719	80	-0.2834951	80	-0.3069386	80	-0.271527	80	-0.3099084	80	-0.2712518	80	-0.2743462	80	-0.2529236
80.2	-0.2981217	80.2	-0.3329306	80.2	-0.3112948	80.2	-0.2618358	80.2	-0.3197847	80.2	-0.2754568	80.2	-0.2704312	80.2	-0.2573221	80.2	-0.3193064	80.2	-0.2791718	80.2	-0.3028983	80.2	-0.2691176	80.2	-0.3113515	80.2	-0.2743384	80.2	-0.2673975	80.2	-0.2572702
80.4	-0.295084	80.4	-0.333484	80.4	-0.3068808	80.4	-0.2629886	80.4	-0.3211502	80.4	-0.2724801	80.4	-0.2638706	80.4	-0.2540438	80.4	-0.3147632	80.4	-0.2814402	80.4	-0.3049966	80.4	-0.2695744	80.4	-0.3099613	80.4	-0.2696503	80.4	-0.2675701	80.4	-0.256947
80.6	-0.2986655	80.6	-0.3370064	80.6	-0.3093986	80.6	-0.2575022	80.6	-0.3237194	80.6	-0.2733321	80.6	-0.2714236	80.6	-0.2543292	80.6	-0.3138119	80.6	-0.2825002	80.6	-0.3039575	80.6	-0.2696785	80.6	-0.3114304	80.6	-0.2723956	80.6	-0.2689624	80.6	-0.2556171
80.8	-0.2956924	80.8	-0.3350428	80.8	-0.3090753	80.8	-0.2580749	80.8	-0.3225954	80.8	-0.2714062	80.8	-0.2715762	80.8	-0.256707	80.8	-0.3171565	80.8	-0.2771958	80.8	-0.3008741	80.8	-0.265036	80.8	-0.3086049	80.8	-0.2676408	80.8	-0.2666414	80.8	-0.24841
81	-0.2941447	81	-0.3307432	81	-0.3066368	81	-0.2589136	81	-0.3186007	81	-0.2732639	81	-0.2693994	81	-0.2518352	81	-0.3144603	81	-0.2749228	81	-0.3051878	81	-0.2633938	81	-0.3046146	81	-0.2683005	81	-0.2617152	81	-0.254157
81.2	-0.2932069	81.2	-0.3371378	81.2	-0.307393	81.2	-0.2588604	81.2	-0.3191035	81.2	-0.2686805	81.2	-0.2623611	81.2	-0.2527466	81.2	-0.3118103	81.2	-0.2726731	81.2	-0.3047491	81.2	-0.2694575	81.2	-0.3072767	81.2	-0.2698184	81.2	-0.2682495	81.2	-0.2536249
81.4	-0.2965383	81.4	-0.3289061	81.4	-0.3043059	81.4	-0.2557522	81.4	-0.3223584	81.4	-0.2697765	81.4	-0.2684156	81.4	-0.2518253	81.4	-0.3127759	81.4	-0.2750452	81.4	-0.3023962	81.4	-0.2714159	81.4	-0.3038318	81.4	-0.268025	81.4	-0.2654541	81.4	-0.2460724
81.6	-0.2930631	81.6	-0.334129	81.6	-0.3073005	81.6	-0.2570224	81.6	-0.3185627	81.6	-0.2696474	81.6	-0.2624677	81.6	-0.2530639	81.6	-0.3119174	81.6	-0.2710876	81.6	-0.3043939	81.6	-0.2632856	81.6	-0.3060856	81.6	-0.2618191	81.6	-0.2651461	81.6	-0.2495801
81.8	-0.2913311	81.8	-0.3273488	81.8	-0.3050902	81.8	-0.2557061	81.8	-0.3126471	81.8	-0.2683063	81.8	-0.2659101	81.8	-0.2503778	81.8	-0.3089637	81.8	-0.275225	81.8	-0.3016374	81.8	-0.2609913	81.8	-0.3041499	81.8	-0.266096	81.8	-0.2631802	81.8	-0.2506248
82	-0.2859002	82	-0.3316127	82	-0.2988875	82	-0.2497535	82	-0.3200817	82	-0.2712653	82	-0.2584922	82	-0.2511342	82	-0.3152688	82	-0.2781591	82	-0.2971668	82	-0.2609416	82	-0.3014144	82	-0.2652752	82	-0.2688756	82	-0.2481985
82.2	-0.2946425	82.2	-0.33227	82.2	-0.3048095	82.2	-0.2556089	82.2	-0.3158656	82.2	-0.264515	82.2	-0.2578583	82.2	-0.2475576	82.2	-0.3081443	82.2	-0.2683315	82.2	-0.2980111	82.2	-0.2571695	82.2	-0.2968639	82.2	-0.2655712	82.2	-0.2620368	82.2	-0.2480862
82.4	-0.2889188	82.4	-0.3301736	82.4	-0.3035021	82.4	-0.2520855	82.4	-0.3192149	82.4	-0.267675	82.4	-0.2669417	82.4	-0.2510619	82.4	-0.3106171	82.4	-0.2793026	82.4	-0.2975169	82.4	-0.2612053	82.4	-0.3022296	82.4	-0.2660582	82.4	-0.2633249	82.4	-0.2504217
82.6	-0.2869286	82.6	-0.332596	82.6	-0.3043722	82.6	-0.2518526	82.6	-0.3182717	82.6	-0.2616363	82.6	-0.261302	82.6	-0.2461366	82.6	-0.3099444	82.6	-0.2715062	82.6	-0.2970644	82.6	-0.2642656	82.6	-0.2981361	82.6	-0.2583223	82.6	-0.2577907	82.6	-0.2473564
82.8	-0.2914832	82.8	-0.3255472	82.8	-0.2952963	82.8	-0.2512219	82.8	-0.3104641	82.8	-0.2709921	82.8	-0.2592131	82.8	-0.2503004	82.8	-0.3074712	82.8	-0.2700717	82.8	-0.2953925	82.8	-0.2578801	82.8	-0.2974957	82.8	-0.2600558	82.8	-0.2597539	82.8	-0.2504136
83	-0.2882036	83	-0.3266215	83	-0.2979346	83	-0.2560507	83	-0.3171338	83	-0.2638552	83	-0.2613366	83	-0.2476764	83	-0.3074524	83	-0.2751571	83	-0.2909546	83	-0.2578225	83	-0.2977761	83	-0.2648204	83	-0.2583082	83	-0.2455455
83.2	-0.2898991	83.2	-0.3216555	83.2	-0.297173	83.2	-0.2539879	83.2	-0.3116643	83.2	-0.2641804	83.2	-0.2607582	83.2	-0.2431259	83.2	-0.3034312	83.2	-0.2668374	83.2	-0.2961665	83.2	-0.2602677	83.2	-0.3002651	83.2	-0.2593576	83.2	-0.2563729	83.2	-0.242718
83.39	-0.2842911	83.39	-0.3250105	83.39	-0.2989967	83.39	-0.24661	83.39	-0.313211	83.39	-0.2640533	83.39	-0.2618555	83.39	-0.2458977	83.4	-0.3046873	83.4	-0.2679419	83.4	-0.293801	83.4	-0.2569395	83.4	-0.2989222	83.4	-0.2615514	83.4	-0.2544532	83.4	-0.2437081
83.6	-0.2891139	83.6	-0.3251927	83.6	-0.2972464	83.6	-0.2503139	83.6	-0.3089454	83.6	-0.2631509	83.6	-0.2604209	83.6	-0.2473825	83.6	-0.3024844	83.6	-0.2696569	83.6	-0.2893018	83.6	-0.2568548	83.6	-0.2965562	83.6	-0.259925	83.6	-0.260072	83.6	-0.2460246
83.8	-0.2876289	83.8	-0.3237594	83.8	-0.2978041	83.8	-0.2443139	83.8	-0.3127329	83.8	-0.2615658	83.8	-0.2552125	83.8	-0.2429133	83.8	-0.3065426	83.8	-0.270509	83.8	-0.2935019	83.8	-0.2585175	83.8	-0.2963714	83.8	-0.2611653	83.8	-0.2535382	83.8	-0.2469415
83.99	-0.2822858	83.99	-0.3199417	83.99	-0.2965667	83.99	-0.2475604	83.99	-0.3150692	83.99	-0.2633849	83.99	-0.2539122	83.99	-0.2455317	84	-0.3070405	84	-0.2658785	84	-0.2926231	84	-0.2603875	84	-0.2933447	84	-0.2631529	84	-0.2550419	84	-0.2450989
84.2	-0.2853452	84.2	-0.3241355	84.2	-0.2965356	84.2	-0.2450036	84.2	-0.3092828	84.2	-0.2617594	84.2	-0.2560793	84.2	-0.2471768	84.2	-0.3048751	84.2	-0.2664113	84.2	-0.297475	84.2	-0.2580813	84.2	-0.2940315	84.2	-0.264362	84.2	-0.2564843	84.2	-0.2412022
84.4	-0.2802762	84.4	-0.3211431	84.4	-0.2912083	84.4	-0.2451264	84.4	-0.3086331	84.4	-0.2573012	84.4	-0.256591	84.4	-0.2392792	84.4	-0.3056985	84.4	-0.268486	84.4	-0.2941999	84.4	-0.2647013	84.4	-0.2897713	84.4	-0.2612429	84.4	-0.2539679	84.4	-0.2410412
84.6	-0.2857021	84.6	-0.3209742	84.6	-0.2936986	84.6	-0.2462729	84.6	-0.3052513	84.6	-0.2526198	84.6	-0.2542399	84.6	-0.2373101	84.6	-0.3036824	84.6	-0.2666799	84.6	-0.2933326	84.6	-0.2562204	84.6	-0.2983197	84.6	-0.2557905	84.6	-0.2558559	84.6	-0.2429146
84.8	-0.2764551	84.8	-0.3238109	84.8	-0.2901999	84.8	-0.2429024	84.8	-0.3062881	84.8	-0.2561383	84.8	-0.2543719	84.8	-0.241467	84.8	-0.3008062	84.8	-0.2647811	84.8	-0.2885981	84.8	-0.2537899	84.8	-0.2931413	84.8	-0.2586957	84.8	-0.2511638	84.8	-0.2416122
84.99	-0.2853233	84.99	-0.3198529	84.99	-0.2940874	84.99	-0.2431118	84.99	-0.3071721	84.99	-0.2619649	84.99	-0.2513655	84.99	-0.2428874	85	-0.2991944	85	-0.2662007	85	-0.2908479	85	-0.254877	85	-0.2920405	85	-0.2597003	85	-0.2529814	85	-0.2389604
85.2	-0.2852557	85.2	-0.3174722	85.2	-0.2940412	85.2	-0.2385646	85.2	-0.311599	85.2	-0.2554684	85.2	-0.2516112	85.2	-0.2396716	85.2	-0.3011135	85.2	-0.2643668	85.2	-0.2897899	85.2	-0.2580459	85.2	-0.2922264	85.2	-0.2562579	85.2	-0.2536233	85.2	-0.2403667
85.4	-0.2811753	85.4	-0.3193748	85.4	-0.2939161	85.4	-0.2444466	85.4	-0.3119613	85.4	-0.255386	85.4	-0.2500364	85.4	-0.2415366	85.42	-0.2981936	85.42	-0.2656343	85.42	-0.2935763	85.42	-0.2565434	85.42	-0.2946416	85.42	-0.2540501	85.42	-0.2484957	85.42	-0.2405176
85.6	-0.2793276	85.6	-0.3163413	85.6	-0.2885999	85.6	-0.2347949	85.6	-0.3048914	85.6	-0.2554973	85.6	-0.2486948	85.6	-0.2397836	85.6	-0.3010539	85.6	-0.2619847	85.6	-0.2917959	85.6	-0.2514412	85.6	-0.2916383	85.6	-0.2585339	85.6	-0.2575124	85.6	-0.2395377
85.8	-0.2822636	85.8	-0.3199463	85.8	-0.2895935	85.8	-0.2432763	85.8	-0.3049936	85.8	-0.2535125	85.8	-0.247912	85.8	-0.2412747	85.8	-0.3018093	85.8	-0.2595817	85.8	-0.2874964	85.8	-0.2575836	85.8	-0.2891006	85.8	-0.2591178	85.8	-0.2579144	85.8	-0.239312
86	-0.2817841	86	-0.3176245	86	-0.2895901	86	-0.2384637	86	-0.3079897	86	-0.2553578	86	-0.2550841	86	-0.2414804	86	-0.2942975	86	-0.2642038	86	-0.2878786	86	-0.2507579	86	-0.2910768	86	-0.2528008	86	-0.2534616	86	-0.2366653
86.2	-0.2786126	86.2	-0.3156953	86.2	-0.2874345	86.2	-0.2421753	86.2	-0.3016312	86.2	-0.2528542	86.2	-0.2480582	86.2	-0.2379537	86.2	-0.2948425	86.2	-0.2624204	86.2	-0.2923538	86.2	-0.2484101	86.2	-0.2923186	86.2	-0.2594414	86.2	-0.2485217	86.2	-0.2390324
86.39	-0.2768333	86.39	-0.3158134	86.39	-0.2873293	86.39	-0.2380182	86.39	-0.3042783	86.39	-0.2504121	86.39	-0.2442977	86.39	-0.2389691	86.4	-0.3011203	86.4	-0.2616701	86.4	-0.2880437	86.4	-0.252959	86.4	-0.28799	86.4	-0.2523056	86.4	-0.2518702	86.4	-0.2393297
86.6	-0.2767464	86.6	-0.3138816	86.6	-0.2899485	86.6	-0.2413279	86.6	-0.3033658	86.6	-0.2538666	86.6	-0.2482171	86.6	-0.2338919	86.6	-0.2983626	86.6	-0.2596925	86.6	-0.2842829	86.6	-0.2492972	86.6	-0.2893964	86.6	-0.2512706	86.6	-0.2470611	86.6	-0.2392636
86.79	-0.2823859	86.79	-0.3098825	86.79	-0.2900826	86.79	-0.2388745	86.79	-0.301977	86.79	-0.2530463	86.79	-0.2459943	86.79	-0.24101	86.8	-0.2981156	86.8	-0.2587622	86.8	-0.2840351	86.8	-0.2485905	86.8	-0.2901014	86.8	-0.2519256	86.8	-0.2474919	86.8	-0.232886
87	-0.2768655	87	-0.3128131	87	-0.2838625	87	-0.236112	87	-0.3027352	87	-0.2515059	87	-0.2471167	87	-0.2371777	87	-0.2964717	87	-0.2592592	87	-0.2879372	87	-0.2527056	87	-0.2868357	87	-0.254611	87	-0.2528481	87	-0.2351544
87.19	-0.2768533	87.19	-0.3106898	87.19	-0.2875763	87.19	-0.2375771	87.19	-0.3004428	87.19	-0.2500812	87.19	-0.2442951	87.19	-0.2324247	87.2	-0.2902043	87.2	-0.2602546	87.2	-0.2805786	87.2	-0.2491259	87.2	-0.2848599	87.2	-0.2485829	87.2	-0.2433018	87.2	-0.2353317
87.39	-0.2776794	87.39	-0.3179922	87.39	-0.2845148	87.39	-0.2371442	87.39	-0.3033841	87.39	-0.2478087	87.39	-0.2472798	87.39	-0.2362355	87.4	-0.2968887	87.4	-0.2630309	87.4	-0.2862227	87.4	-0.2465874	87.4	-0.2852392	87.4	-0.2508914	87.4	-0.2434812	87.4	-0.2353998
87.59	-0.2713216	87.59	-0.3144742	87.59	-0.2843296	87.59	-0.2390153	87.59	-0.2983115	87.59	-0.2485588	87.59	-0.2480413	87.59	-0.2357809	87.6	-0.2917061	87.6	-0.2598081	87.6	-0.2825496	87.6	-0.2469785	87.6	-0.2880976	87.6	-0.2515988	87.6	-0.2466267	87.6	-0.2292452
87.8	-0.274529	87.8	-0.3114915	87.8	-0.2818604	87.8	-0.2378336	87.8	-0.301441	87.8	-0.2476029	87.8	-0.2392587	87.8	-0.2352615	87.8	-0.291575	87.8	-0.2566673	87.8	-0.285134	87.8	-0.2508723	87.8	-0.2887956	87.8	-0.2536468	87.8	-0.2429171	87.8	-0.2315506
88	-0.2725753	88	-0.3127406	88	-0.2847124	88	-0.2359531	88	-0.3034676	88	-0.2496766	88	-0.2452603	88	-0.2384876	88	-0.2941095	88	-0.2534416	88	-0.2802565	88	-0.2465754	88	-0.2859284	88	-0.2506324	88	-0.2447114	88	-0.2341446
88.2	-0.2733516	88.2	-0.3121685	88.2	-0.2840368	88.2	-0.2331661	88.2	-0.3042446	88.2	-0.2501207	88.2	-0.2441788	88.2	-0.2260361	88.2	-0.2923135	88.2	-0.2532062	88.2	-0.2822104	88.2	-0.2437725	88.2	-0.2861676	88.2	-0.2489376	88.2	-0.2475963	88.2	-0.2352815
88.4	-0.2771231	88.4	-0.3117533	88.4	-0.2830556	88.4	-0.2388693	88.4	-0.2973387	88.4	-0.2466687	88.4	-0.2433326	88.4	-0.2308613	88.4	-0.2961276	88.4	-0.2569351	88.4	-0.2794052	88.4	-0.2441058	88.4	-0.2872372	88.4	-0.2493695	88.4	-0.2479271	88.4	-0.2318285
88.59	-0.2774337	88.59	-0.3101817	88.59	-0.2823101	88.59	-0.2311528	88.59	-0.3000183	88.59	-0.2453324	88.59	-0.2375314	88.59	-0.228626	88.6	-0.2927171	88.6	-0.2561773	88.6	-0.2762743	88.6	-0.2462611	88.6	-0.2846296	88.6	-0.2454577	88.6	-0.2419723	88.6	-0.2336199
88.8	-0.268749	88.8	-0.3099781	88.8	-0.2816436	88.8	-0.2322236	88.8	-0.2978494	88.8	-0.2466637	88.8	-0.2356912	88.8	-0.2342754	88.8	-0.2913052	88.8	-0.2554132	88.8	-0.2803281	88.8	-0.2483007	88.8	-0.2827071	88.8	-0.244188	88.8	-0.2464443	88.8	-0.2316904
88.99	-0.2729881	88.99	-0.3109715	88.99	-0.2815559	88.99	-0.231958	88.99	-0.3023725	88.99	-0.2458119	88.99	-0.2389418	88.99	-0.2321482	89	-0.2912186	89	-0.2528108	89	-0.2860514	89	-0.2430699	89	-0.2856426	89	-0.2442772	89	-0.2460827	89	-0.2327207
89.19	-0.2712954	89.19	-0.3112514	89.19	-0.2781951	89.19	-0.2301801	89.19	-0.2956244	89.19	-0.2428945	89.19	-0.2438724	89.19	-0.2305375	89.2	-0.2895121	89.2	-0.2526077	89.2	-0.2813258	89.2	-0.2422294	89.2	-0.2869512	89.2	-0.243603	89.2	-0.2412145	89.2	-0.2306362
89.39	-0.2674717	89.39	-0.3135326	89.39	-0.2736697	89.39	-0.2313931	89.39	-0.2974156	89.39	-0.2433584	89.39	-0.2423022	89.39	-0.2278392	89.4	-0.2887934	89.4	-0.258911	89.4	-0.2757756	89.4	-0.2451342	89.4	-0.2865528	89.4	-0.2462624	89.4	-0.2430706	89.4	-0.230768
89.59	-0.2678259	89.59	-0.3057659	89.59	-0.2790166	89.59	-0.2292375	89.59	-0.2939524	89.59	-0.2441499	89.59	-0.238655	89.59	-0.226479	89.6	-0.2861328	89.6	-0.2561017	89.6	-0.2801134	89.6	-0.2414387	89.6	-0.2818088	89.6	-0.2489366	89.6	-0.2434057	89.6	-0.232716
89.79	-0.270257	89.79	-0.3074279	89.79	-0.2794557	89.79	-0.2297018	89.79	-0.2975002	89.79	-0.2416975	89.79	-0.2380726	89.79	-0.2291508	89.8	-0.2903932	89.8	-0.2539563	89.8	-0.2766849	89.8	-0.238497	89.8	-0.2851137	89.8	-0.2425042	89.8	-0.2405428	89.8	-0.2318498
89.99	-0.26817	89.99	-0.3056047	89.99	-0.2764065	89.99	-0.2307186	89.99	-0.2965157	89.99	-0.2421307	89.99	-0.2443464	89.99	-0.2177811	90	-0.2876187	90	-0.2495602	90	-0.2728419	90	-0.2370015	90	-0.2781068	90	-0.240409	90	-0.2336025	90	-0.2315256
90.19	-0.2675038	90.19	-0.308738	90.19	-0.2770535	90.19	-0.2312664	90.19	-0.299671	90.19	-0.2462451	90.19	-0.247629	90.19	-0.2176674	90.2	-0.2883096	90.2	-0.2507656	90.2	-0.276598	90.2	-0.2353821	90.2	-0.2809322	90.2	-0.2413585	90.2	-0.2381536	90.2	-0.2279588
90.39	-0.2684097	90.39	-0.3026884	90.39	-0.281024	90.39	-0.2306688	90.39	-0.2980266	90.39	-0.2414054	90.39	-0.2403288	90.39	-0.2174363	90.4	-0.2865985	90.4	-0.2502886	90.4	-0.277779	90.4	-0.2397361	90.4	-0.2746507	90.4	-0.2409349	90.4	-0.2392758	90.4	-0.2259463
90.59	-0.2608393	90.59	-0.3082116	90.59	-0.275039	90.59	-0.2226768	90.59	-0.2959265	90.59	-0.2392871	90.59	-0.2349236	90.59	-0.2155694	90.6	-0.286611	90.6	-0.2479977	90.6	-0.271758	90.6	-0.2363956	90.6	-0.2759427	90.6	-0.2413447	90.6	-0.2377178	90.6	-0.223101
90.79	-0.2612252	90.79	-0.2977114	90.79	-0.2733729	90.79	-0.2178781	90.79	-0.292624	90.79	-0.2401223	90.79	-0.2367521	90.79	-0.2205026	90.8	-0.2854229	90.8	-0.2513548	90.8	-0.2710803	90.8	-0.2394715	90.8	-0.2779336	90.8	-0.240746	90.8	-0.2376565	90.8	-0.2211851
90.99	-0.2538989	90.99	-0.296484	90.99	-0.2706642	90.99	-0.219169	90.99	-0.2880394	90.99	-0.2315793	90.99	-0.2343307	90.99	-0.2141253	91	-0.2864196	91	-0.2517903	91	-0.2725694	91	-0.2382551	91	-0.2739279	91	-0.236152	91	-0.2349158	91	-0.2255933
91.19	-0.2523136	91.19	-0.2888361	91.19	-0.2635092	91.19	-0.2178348	91.19	-0.2819985	91.19	-0.2296811	91.19	-0.2309282	91.19	-0.2143833	91.2	-0.2830134	91.2	-0.2484031	91.2	-0.2740349	91.2	-0.2370552	91.2	-0.2763679	91.2	-0.2382318	91.2	-0.2317616	91.2	-0.2227311
91.39	-0.2486161	91.39	-0.2879294	91.39	-0.2590809	91.39	-0.2115522	91.39	-0.278452	91.39	-0.2282161	91.39	-0.2212273	91.39	-0.2175204	91.4	-0.2782003	91.4	-0.242016	91.4	-0.2702076	91.4	-0.2338284	91.4	-0.2750035	91.4	-0.2387435	91.4	-0.2322297	91.4	-0.2216704
91.59	-0.2443477	91.59	-0.2810506	91.59	-0.2526251	91.59	-0.207391	91.59	-0.2695282	91.59	-0.2195796	91.59	-0.2196202	91.59	-0.2141587	91.6	-0.2854309	91.6	-0.2420527	91.6	-0.2721782	91.6	-0.2340213	91.6	-0.2756994	91.6	-0.2345221	91.6	-0.2322977	91.6	-0.2260976
91.79	-0.2334998	91.79	-0.2736085	91.79	-0.254646	91.79	-0.2045604	91.79	-0.2688701	91.79	-0.2204408	91.79	-0.2154345	91.79	-0.2135375	91.8	-0.2797602	91.8	-0.2380511	91.8	-0.2734287	91.8	-0.2354834	91.8	-0.2710049	91.8	-0.2365566	91.8	-0.2327534	91.8	-0.2237734
91.99	-0.2324531	91.99	-0.2766226	91.99	-0.2499194	91.99	-0.1958197	91.99	-0.2576346	91.99	-0.2148119	91.99	-0.2040606	91.99	-0.2149779	92	-0.2829199	92	-0.2486252	92	-0.2703535	92	-0.2354682	92	-0.2688161	92	-0.2368038	92	-0.23068	92	-0.2208711
92.19	-0.2258343	92.19	-0.2677984	92.19	-0.2415079	92.19	-0.1928346	92.19	-0.2516702	92.19	-0.2055618	92.19	-0.201549	92.19	-0.2126989	92.2	-0.2781583	92.2	-0.2418825	92.2	-0.2666906	92.2	-0.2328818	92.2	-0.2724839	92.2	-0.2356	92.2	-0.234594	92.2	-0.2258386
92.39	-0.2251383	92.39	-0.2601357	92.39	-0.2321709	92.39	-0.1840262	92.39	-0.2523428	92.39	-0.2017629	92.39	-0.1948317	92.39	-0.2116831	92.4	-0.2861995	92.4	-0.2464853	92.4	-0.2699997	92.4	-0.2356795	92.4	-0.2756011	92.4	-0.2348409	92.4	-0.2339375	92.4	-0.2200051
92.59	-0.216226	92.59	-0.2555322	92.59	-0.2234998	92.59	-0.1838533	92.59	-0.2481046	92.59	-0.2012279	92.59	-0.193864	92.59	-0.2142807	92.6	-0.279691	92.6	-0.2405287	92.6	-0.2709263	92.6	-0.2296234	92.6	-0.2724453	92.6	-0.2370305	92.6	-0.2308984	92.6	-0.2196847
92.79	-0.2104533	92.79	-0.2540991	92.79	-0.2265353	92.79	-0.17734	92.79	-0.2419407	92.79	-0.1876963	92.79	-0.190511	92.79	-0.2116719	92.8	-0.2799868	92.8	-0.2421679	92.8	-0.2693007	92.8	-0.2306101	92.8	-0.2681697	92.8	-0.2340591	92.8	-0.2303368	92.8	-0.2200687
92.99	-0.2075455	92.99	-0.2459102	92.99	-0.2195404	92.99	-0.1761365	92.99	-0.2361851	92.99	-0.1845657	92.99	-0.1844202	92.99	-0.2099521	93	-0.2826737	93	-0.2408035	93	-0.2713496	93	-0.226093	93	-0.2697926	93	-0.236061	93	-0.23086	93	-0.2187362
93.19	-0.2014336	93.19	-0.2414574	93.19	-0.2141911	93.19	-0.1681781	93.19	-0.2317869	93.19	-0.1793351	93.19	-0.1740238	93.19	-0.2054607	93.2	-0.2791895	93.2	-0.2389992	93.2	-0.2643056	93.2	-0.2301751	93.2	-0.2681931	93.2	-0.2373912	93.2	-0.2261876	93.2	-0.2181218
93.39	-0.1940732	93.39	-0.2346256	93.39	-0.2088286	93.39	-0.1647621	93.39	-0.2249722	93.39	-0.1759365	93.39	-0.1661882	93.39	-0.2120319	93.4	-0.2807656	93.4	-0.2422881	93.4	-0.2646076	93.4	-0.23298	93.4	-0.2659012	93.4	-0.235472	93.4	-0.2289786	93.4	-0.2176001
93.59	-0.1926003	93.59	-0.2345177	93.59	-0.2049863	93.59	-0.1567551	93.59	-0.2194412	93.59	-0.1737441	93.59	-0.16488	93.59	-0.2125728	93.6	-0.2756745	93.6	-0.2387533	93.6	-0.2678729	93.6	-0.2262886	93.6	-0.2698468	93.6	-0.235625	93.6	-0.2305903	93.6	-0.2170345
93.79	-0.1833287	93.79	-0.2299527	93.79	-0.1941245	93.79	-0.152872	93.79	-0.2177884	93.79	-0.1641892	93.79	-0.1608128	93.79	-0.2090044	93.8	-0.2756059	93.8	-0.238105	93.8	-0.2650218	93.8	-0.2281929	93.8	-0.2679715	93.8	-0.2339999	93.8	-0.2324681	93.8	-0.2172308
93.99	-0.1826653	93.99	-0.2243643	93.99	-0.1915165	93.99	-0.1472936	93.99	-0.2115525	93.99	-0.1601399	93.99	-0.1588688	93.99	-0.210688	94	-0.2777724	94	-0.2388602	94	-0.2692904	94	-0.231475	94	-0.2682175	94	-0.2319456	94	-0.2290348	94	-0.2148167
94.19	-0.1756088	94.19	-0.2167377	94.19	-0.1890945	94.19	-0.1423912	94.19	-0.2087247	94.19	-0.1595649	94.19	-0.1504739	94.19	-0.2071358	94.2	-0.2795455	94.2	-0.2432369	94.2	-0.2629105	94.2	-0.2282296	94.2	-0.2662527	94.2	-0.2286687	94.2	-0.2307827	94.2	-0.2146646
94.39	-0.1752144	94.39	-0.2143985	94.39	-0.1842454	94.39	-0.1374836	94.39	-0.2032635	94.39	-0.1552323	94.39	-0.1451862	94.39	-0.2085328	94.4	-0.2727216	94.4	-0.2403659	94.4	-0.2658952	94.4	-0.2275009	94.4	-0.2700767	94.4	-0.2305213	94.4	-0.2263145	94.4	-0.2160326
94.59	-0.1643736	94.59	-0.2043691	94.59	-0.1777373	94.59	-0.1321102	94.59	-0.1933562	94.59	-0.1450114	94.59	-0.1380153	94.59	-0.2102671	94.6	-0.2727167	94.6	-0.2379028	94.6	-0.2630244	94.6	-0.2252484	94.6	-0.2687582	94.6	-0.2316906	94.6	-0.2282628	94.6	-0.2198996
94.79	-0.1574415	94.79	-0.2007277	94.79	-0.1670708	94.79	-0.1272826	94.79	-0.1932877	94.79	-0.1404935	94.79	-0.1327969	94.79	-0.2057382	94.8	-0.2747337	94.8	-0.2423662	94.8	-0.26508	94.8	-0.2295809	94.8	-0.2678229	94.8	-0.2324957	94.8	-0.2257617	94.8	-0.2164542
94.99	-0.1548152	94.99	-0.186312	94.99	-0.1704062	94.99	-0.1201185	94.99	-0.1861101	94.99	-0.1392263	94.99	-0.130007	94.99	-0.2039284	95	-0.2762993	95	-0.2406048	95	-0.2614143	95	-0.2277438	95	-0.2661725	95	-0.2290552	95	-0.2261498	95	-0.2121661
95.19	-0.1492928	95.19	-0.1892557	95.19	-0.1604605	95.19	-0.1170141	95.19	-0.1794861	95.19	-0.129005	95.19	-0.1205713	95.19	-0.2066448	95.2	-0.2733487	95.2	-0.2355117	95.2	-0.2607601	95.2	-0.2236082	95.2	-0.2635523	95.2	-0.2324637	95.2	-0.2250032	95.2	-0.2135212
95.39	-0.1474855	95.39	-0.1834722	95.39	-0.1531012	95.39	-0.1131091	95.39	-0.1748583	95.39	-0.1292437	95.39	-0.1221938	95.39	-0.2040769	95.4	-0.2749246	95.4	-0.2379235	95.4	-0.2580668	95.4	-0.2302398	95.4	-0.2654882	95.4	-0.2304358	95.4	-0.2273805	95.4	-0.2147554
95.59	-0.1381223	95.59	-0.1783535	95.59	-0.1472351	95.59	-0.1111555	95.59	-0.1715029	95.59	-0.119453	95.59	-0.11267	95.59	-0.2077422	95.6	-0.2744926	95.6	-0.236413	95.6	-0.2622847	95.6	-0.2270415	95.6	-0.2640566	95.6	-0.2308005	95.6	-0.2269955	95.6	-0.2105195
95.79	-0.1407211	95.79	-0.169835	95.79	-0.1460956	95.79	-0.1032781	95.79	-0.1632303	95.79	-0.1177117	95.79	-0.1083693	95.79	-0.2088474	95.8	-0.2750655	95.8	-0.2397207	95.8	-0.2602676	95.8	-0.2250734	95.8	-0.2663305	95.8	-0.2324807	95.8	-0.2241876	95.8	-0.2154216
95.99	-0.1287925	95.99	-0.1658249	95.99	-0.1431409	95.99	-0.0986308	95.99	-0.1581705	95.99	-0.111953	95.99	-0.1001743	95.99	-0.204853	96	-0.2729174	96	-0.2317229	96	-0.259585	96	-0.2245575	96	-0.2628753	96	-0.2244921	96	-0.2203243	96	-0.2113055
96.19	-0.1222697	96.19	-0.1618237	96.19	-0.1354352	96.19	-0.0910268	96.19	-0.1516361	96.19	-0.1030507	96.19	-0.09951279	96.19	-0.2072681	96.2	-0.2736211	96.2	-0.2344314	96.2	-0.260887	96.2	-0.2264541	96.2	-0.2661128	96.2	-0.2308474	96.2	-0.2258388	96.2	-0.2123571
96.39	-0.1228194	96.39	-0.1562566	96.39	-0.137459	96.39	-0.09158485	96.39	-0.1503099	96.39	-0.098653	96.39	-0.09230912	96.39	-0.2070444	96.4	-0.2693842	96.4	-0.2358787	96.4	-0.2600878	96.4	-0.2251154	96.4	-0.2632727	96.4	-0.2309674	96.4	-0.2239125	96.4	-0.2137837
96.59	-0.1058463	96.59	-0.1526749	96.59	-0.1263237	96.59	-0.08100715	96.59	-0.144933	96.59	-0.09598992	96.59	-0.08461817	96.59	-0.2087045	96.6	-0.2746637	96.6	-0.2370389	96.6	-0.2567791	96.6	-0.2270743	96.6	-0.2632975	96.6	-0.2234544	96.6	-0.2200083	96.6	-0.2109764
96.79	-0.1061169	96.79	-0.1492411	96.79	-0.1237191	96.79	-0.07703543	96.79	-0.1405856	96.79	-0.08666591	96.79	-0.07428873	96.79	-0.2019242	96.8	-0.2749217	96.8	-0.2324236	96.8	-0.2622906	96.8	-0.223438	96.8	-0.2576991	96.8	-0.229479	96.8	-0.2221098	96.8	-0.2153092
96.99	-0.1044888	96.99	-0.1386021	96.99	-0.1145703	96.99	-0.06955117	96.99	-0.1328272	96.99	-0.08513638	96.99	-0.07862069	96.99	-0.2091017	97	-0.2717466	97	-0.2335611	97	-0.2588136	97	-0.2239601	97	-0.2627414	97	-0.2263967	97	-0.2234745	97	-0.2099787
97.2	-0.09572957	97.2	-0.1373063	97.2	-0.1084906	97.2	-0.05835357	97.2	-0.1264969	97.2	-0.08408985	97.2	-0.06957597	97.2	-0.2026684	97.2	-0.2674694	97.2	-0.2325794	97.2	-0.2591099	97.2	-0.2226734	97.2	-0.2649998	97.2	-0.2294368	97.2	-0.2233892	97.2	-0.2087228
97.39	-0.09209162	97.39	-0.1263595	97.39	-0.1023153	97.39	-0.06268154	97.39	-0.1272168	97.39	-0.07305568	97.39	-0.06555156	97.39	-0.2077032	97.4	-0.2721254	97.4	-0.2353376	97.4	-0.2556429	97.4	-0.2279845	97.4	-0.2638251	97.4	-0.2266036	97.4	-0.2186511	97.4	-0.2089887
97.59	-0.08180082	97.59	-0.1262403	97.59	-0.09808759	97.59	-0.05606089	97.59	-0.1191017	97.59	-0.06537584	97.59	-0.05541612	97.59	-0.2003843	97.6	-0.269888	97.6	-0.2348864	97.6	-0.2560515	97.6	-0.2265751	97.6	-0.2620454	97.6	-0.2259324	97.6	-0.2175795	97.6	-0.2130338
97.79	-0.07704949	97.79	-0.1206407	97.79	-0.09531435	97.79	-0.05551204	97.79	-0.1166779	97.79	-0.06495576	97.79	-0.05898872	97.79	-0.2053416	97.8	-0.2759904	97.8	-0.233774	97.8	-0.2560292	97.8	-0.221553	97.8	-0.2578336	97.8	-0.2246615	97.8	-0.2197836	97.8	-0.2123829
97.99	-0.07706636	97.99	-0.1131407	97.99	-0.09133352	97.99	-0.04629525	97.99	-0.1084264	97.99	-0.05987014	97.99	-0.05205895	97.99	-0.202811	98	-0.2679267	98	-0.2364046	98	-0.2599059	98	-0.222691	98	-0.2604876	98	-0.2247718	98	-0.2196334	98	-0.2077953
98.19	-0.07672189	98.19	-0.1075605	98.19	-0.08430669	98.19	-0.0431149	98.19	-0.1034413	98.19	-0.04980654	98.19	-0.04400115	98.19	-0.2008992	98.2	-0.2692532	98.2	-0.2287203	98.2	-0.2541713	98.2	-0.2194829	98.2	-0.2547678	98.2	-0.2220022	98.2	-0.2197721	98.2	-0.2055567
98.39	-0.06500611	98.39	-0.1047657	98.39	-0.07845587	98.39	-0.03932402	98.39	-0.09491193	98.39	-0.04721276	98.39	-0.03705508	98.39	-0.1982309	98.4	-0.2659992	98.4	-0.238654	98.4	-0.2560829	98.4	-0.2187557	98.4	-0.26126	98.4	-0.2231684	98.4	-0.2149983	98.4	-0.2112017
98.59	-0.06278648	98.59	-0.0976683	98.59	-0.07166485	98.59	-0.02976198	98.59	-0.09184127	98.59	-0.04467808	98.59	-0.03419317	98.59	-0.2041672	98.6	-0.2675109	98.6	-0.2317887	98.6	-0.2522651	98.6	-0.2203584	98.6	-0.257304	98.6	-0.2228193	98.6	-0.2272728	98.6	-0.2078838
98.79	-0.05509616	98.79	-0.09565973	98.79	-0.0651966	98.79	-0.02649138	98.79	-0.0863329	98.79	-0.03733481	98.79	-0.02644352	98.79	-0.1996139	98.8	-0.2672106	98.8	-0.2274198	98.8	-0.2551647	98.8	-0.2180049	98.8	-0.2555878	98.8	-0.2223273	98.8	-0.2248216	98.8	-0.212265
98.99	-0.04777929	98.99	-0.08608676	98.99	-0.0590451	98.99	-0.01718107	98.99	-0.08040394	98.99	-0.03437926	98.99	-0.01726504	98.99	-0.1999335	99	-0.2645924	99	-0.2305382	99	-0.2514946	99	-0.216544	99	-0.2578353	99	-0.2244619	99	-0.2170004	99	-0.2057986
99.19	-0.045142	99.19	-0.0840255	99.19	-0.05711288	99.19	-0.01903713	99.19	-0.0757423	99.19	-0.02883022	99.19	-0.01583321	99.19	-0.2053434	99.2	-0.2690754	99.2	-0.2324004	99.2	-0.2512889	99.2	-0.2204554	99.2	-0.253165	99.2	-0.2241019	99.2	-0.2218062	99.2	-0.2086553
99.39	-0.04100823	99.39	-0.07700621	99.39	-0.05668449	99.39	-0.01029664	99.39	-0.07296336	99.39	-0.02221578	99.39	-0.01256168	99.39	-0.1993177	99.4	-0.2665846	99.4	-0.2313783	99.4	-0.2530469	99.4	-0.2161659	99.4	-0.2614686	99.4	-0.2233398	99.4	-0.2159192	99.4	-0.2087637
99.59	-0.03786676	99.59	-0.07416445	99.59	-0.04429162	99.59	-0.00886163	99.59	-0.06660488	99.59	-0.01638247	99.59	-0.00814512	99.59	-0.2030445	99.6	-0.2664542	99.6	-0.227001	99.6	-0.2560465	99.6	-0.221641	99.6	-0.2562146	99.6	-0.2234749	99.6	-0.2176491	99.6	-0.2033997
99.79	-0.02856754	99.79	-0.06861144	99.79	-0.04091302	99.79	-0.00168075	99.79	-0.05938569	99.79	-0.01331281	99.79	-0.00275444	99.79	-0.1994636	99.8	-0.2662065	99.8	-0.2270128	99.8	-0.2552397	99.8	-0.2197984	99.8	-0.2602266	99.8	-0.2209405	99.8	-0.2199518	99.8	-0.2049516
99.99	-0.02793327	99.99	-0.06492136	99.99	-0.03638055	99.99	0.00235423	99.99	-0.05435551	99.99	-0.00622411	99.99	0.00742452	99.99	-0.2000117	100	-0.2613535	100	-0.2263713	100	-0.2530943	100	-0.2181205	100	-0.2602012	100	-0.2213725	100	-0.2138438	100	-0.2061081
100.19	-0.01911693	100.19	-0.05706731	100.19	-0.03214961	100.19	0.00592408	100.19	-0.05250636	100.19	-0.0011046	100.19	0.00697416	100.19	-0.1981171	100.2	-0.2661554	100.2	-0.2294183	100.2	-0.2567021	100.2	-0.216158	100.2	-0.2564645	100.2	-0.2190693	100.2	-0.2173562	100.2	-0.2047673
100.39	-0.01412221	100.39	-0.05397951	100.39	-0.02168001	100.39	0.01544922	100.39	-0.04570598	100.39	0.00656983	100.39	0.02034476	100.39	-0.1964064	100.4	-0.2678188	100.4	-0.2285161	100.4	-0.2501372	100.4	-0.215052	100.4	-0.2600338	100.4	-0.2184994	100.4	-0.2134093	100.4	-0.2053789
100.59	-0.01039105	100.59	-0.04654485	100.59	-0.02198238	100.59	0.01728474	100.59	-0.04573574	100.59	0.01130129	100.59	0.02156474	100.59	-0.1978518	100.6	-0.2655586	100.6	-0.2243434	100.6	-0.2545245	100.6	-0.216498	100.6	-0.2593652	100.6	-0.2188249	100.6	-0.2093353	100.6	-0.2044376
100.79	-0.00380585	100.79	-0.04441833	100.79	-0.01469226	100.79	0.01805694	100.79	-0.03717595	100.79	0.01503239	100.79	0.02340289	100.79	-0.1998965	100.8	-0.2602581	100.8	-0.229225	100.8	-0.2513618	100.8	-0.2168603	100.8	-0.2540705	100.8	-0.2157769	100.8	-0.2147976	100.8	-0.2025218
100.99	0.00004556	100.99	-0.03968652	100.99	-0.01152544	100.99	0.02818572	100.99	-0.03174593	100.99	0.01689417	100.99	0.02999876	100.99	-0.2023782	101	-0.2635241	101	-0.2264081	101	-0.2522197	101	-0.220636	101	-0.2517928	101	-0.2212809	101	-0.2155175	101	-0.2031924
101.19	0.00673751	101.19	-0.0300883	101.19	-0.00720812	101.19	0.03120564	101.19	-0.02453809	101.19	0.01836475	101.19	0.03118606	101.19	-0.1936772	101.2	-0.2632132	101.2	-0.2237605	101.2	-0.2498268	101.2	-0.2160438	101.2	-0.252256	101.2	-0.2153684	101.2	-0.2145141	101.2	-0.203085
101.39	0.01301074	101.39	-0.02914721	101.39	-0.00517746	101.39	0.03529796	101.39	-0.02257005	101.39	0.02275958	101.39	0.03960465	101.39	-0.1959313	101.4	-0.2636663	101.4	-0.2282488	101.4	-0.2527114	101.4	-0.2179093	101.4	-0.2542603	101.4	-0.2161182	101.4	-0.2108728	101.4	-0.2008085
101.59	0.01737725	101.59	-0.02436204	101.59	0.00390789	101.59	0.04018061	101.59	-0.01514973	101.59	0.03734317	101.59	0.04676141	101.59	-0.199306	101.6	-0.2650796	101.6	-0.2225849	101.6	-0.2481942	101.6	-0.217216	101.6	-0.253309	101.6	-0.2151466	101.6	-0.2123879	101.6	-0.2049836
101.79	0.02077835	101.79	-0.01955401	101.79	0.00482262	101.79	0.04869232	101.79	-0.01175435	101.79	0.0395645	101.79	0.05113219	101.79	-0.1962925	101.8	-0.2613826	101.8	-0.2229538	101.8	-0.2555641	101.8	-0.2137714	101.8	-0.2591018	101.8	-0.218566	101.8	-0.2131631	101.8	-0.2033718
101.99	0.0281634	101.99	-0.01271502	101.99	0.01110701	101.99	0.05161142	101.99	-0.01102121	101.99	0.04395483	101.99	0.05721537	101.99	-0.1967273	102	-0.2629685	102	-0.227794	102	-0.2496055	102	-0.2150726	102	-0.2523505	102	-0.2108154	102	-0.2149136	102	-0.2036669
102.19	0.03454723	102.19	-0.00723991	102.19	0.02330407	102.19	0.05819639	102.19	-0.00159937	102.19	0.04408032	102.19	0.06115649	102.19	-0.1930486	102.2	-0.260943	102.2	-0.2216227	102.2	-0.2506399	102.2	-0.2082808	102.2	-0.2563269	102.2	-0.2186171	102.2	-0.2125884	102.2	-0.2045504
102.39	0.03384526	102.39	-0.0061765	102.39	0.02182349	102.39	0.05786289	102.39	0.00398888	102.39	0.05168232	102.39	0.06698187	102.39	-0.2010198	102.4	-0.2607267	102.4	-0.2270242	102.4	-0.2516755	102.4	-0.2120074	102.4	-0.2541903	102.4	-0.2163387	102.4	-0.213942	102.4	-0.1975062
102.59	0.04157421	102.59	0.00430351	102.59	0.02764369	102.59	0.06910516	102.59	0.00855225	102.59	0.0571293	102.59	0.07256972	102.59	-0.1994394	102.6	-0.2600474	102.6	-0.2249231	102.6	-0.2530116	102.6	-0.2124441	102.6	-0.2494403	102.6	-0.2160464	102.6	-0.2146045	102.6	-0.2013255
102.79	0.04370847	102.79	0.01517575	102.79	0.03499596	102.79	0.06974257	102.79	0.01276289	102.79	0.06328939	102.79	0.07728841	102.79	-0.1941533	102.8	-0.261218	102.8	-0.2242344	102.8	-0.2468305	102.8	-0.2140398	102.8	-0.2540132	102.8	-0.2122271	102.8	-0.2105989	102.8	-0.1986629
102.99	0.04927424	102.99	0.01262404	102.99	0.03968807	102.99	0.07384622	102.99	0.02111305	102.99	0.06770071	102.99	0.08310556	102.99	-0.1940729	103	-0.2591204	103	-0.222615	103	-0.246554	103	-0.2168326	103	-0.2515751	103	-0.2138424	103	-0.2097926	103	-0.199371
103.19	0.05517996	103.19	0.01902799	103.19	0.04286823	103.19	0.0833627	103.19	0.02007263	103.19	0.06971774	103.19	0.08774523	103.19	-0.1923043	103.2	-0.2599465	103.2	-0.2201088	103.2	-0.2513972	103.2	-0.2124563	103.2	-0.2507689	103.2	-0.2153769	103.2	-0.2126592	103.2	-0.2000397
103.39	0.06227006	103.39	0.02195747	103.39	0.04308986	103.39	0.08938993	103.39	0.02684101	103.39	0.08006506	103.39	0.09004232	103.39	-0.1959265	103.4	-0.2610807	103.4	-0.2281108	103.4	-0.2521076	103.4	-0.2084617	103.4	-0.2472656	103.4	-0.2141838	103.4	-0.2134888	103.4	-0.198738
103.59	0.06712712	103.59	0.02934861	103.59	0.05214034	103.59	0.09017077	103.59	0.02808512	103.59	0.08270735	103.59	0.09064542	103.59	-0.1972684	103.6	-0.2568938	103.6	-0.2215083	103.6	-0.2448221	103.6	-0.2160968	103.6	-0.246423	103.6	-0.2155455	103.6	-0.2107377	103.6	-0.1987236
103.79	0.07057409	103.79	0.03209243	103.79	0.06067102	103.79	0.09796967	103.79	0.03391281	103.79	0.08727127	103.79	0.09995176	103.79	-0.1927013	103.8	-0.2614776	103.8	-0.2233612	103.8	-0.2459182	103.8	-0.2105601	103.8	-0.2463399	103.8	-0.2131869	103.8	-0.2149893	103.8	-0.1992865
103.99	0.07657863	103.99	0.03604573	103.99	0.06158504	103.99	0.09758802	103.99	0.04345163	103.99	0.09057641	103.99	0.1048549	103.99	-0.1962591	104	-0.2597786	104	-0.2210214	104	-0.2445438	104	-0.2094624	104	-0.2515811	104	-0.2086691	104	-0.2083538	104	-0.2007308
104.19	0.08007759	104.19	0.04173975	104.19	0.06748867	104.19	0.1045851	104.19	0.04612787	104.19	0.0905416	104.19	0.116695	104.19	-0.191753	104.2	-0.2526679	104.2	-0.2184373	104.2	-0.2479617	104.2	-0.2083233	104.2	-0.2496617	104.2	-0.2141331	104.2	-0.2103024	104.2	-0.2024463
104.39	0.08395723	104.39	0.0489823	104.39	0.07155775	104.39	0.11089	104.39	0.05101454	104.39	0.1028581	104.39	0.1150686	104.39	-0.1911266	104.4	-0.2576275	104.4	-0.2187674	104.4	-0.2461507	104.4	-0.2100105	104.4	-0.2465521	104.4	-0.2103841	104.4	-0.2082439	104.4	-0.1950029
104.59	0.09038525	104.59	0.051541	104.59	0.07498439	104.59	0.1159357	104.59	0.05471634	104.59	0.1028656	104.59	0.1244411	104.59	-0.1982109	104.6	-0.2579727	104.6	-0.22648	104.6	-0.246301	104.6	-0.2090646	104.6	-0.2430612	104.6	-0.2143862	104.6	-0.2127872	104.6	-0.1978058
104.79	0.09438825	104.79	0.0563991	104.79	0.08485863	104.79	0.1176838	104.79	0.06185798	104.79	0.1106237	104.79	0.1269827	104.79	-0.1948383	104.8	-0.2553229	104.8	-0.2186548	104.8	-0.2455804	104.8	-0.2053572	104.8	-0.2453526	104.8	-0.2068032	104.8	-0.2049717	104.8	-0.1936805
104.99	0.09793907	104.99	0.06192446	104.99	0.08713797	104.99	0.1178931	104.99	0.07182934	104.99	0.118885	104.99	0.1314571	104.99	-0.1913105	105	-0.252443	105	-0.2185382	105	-0.2470365	105	-0.2081912	105	-0.2448679	105	-0.2084383	105	-0.206397	105	-0.1970678
105.19	0.1042037	105.19	0.06355496	105.19	0.08914286	105.19	0.1275253	105.19	0.0686096	105.19	0.1191536	105.19	0.137904	105.19	-0.1889168	105.2	-0.2568299	105.2	-0.2164475	105.2	-0.2426056	105.2	-0.2073979	105.2	-0.2435785	105.2	-0.2138605	105.2	-0.2019881	105.2	-0.1961897
105.39	0.1110401	105.39	0.07139261	105.39	0.0948191	105.39	0.1286673	105.39	0.07203092	105.39	0.1248837	105.39	0.1406418	105.39	-0.1910046	105.4	-0.2576268	105.4	-0.2202676	105.4	-0.2378393	105.4	-0.2091991	105.4	-0.2493457	105.4	-0.2104222	105.4	-0.2065189	105.4	-0.1930525
105.59	0.1160967	105.59	0.0756715	105.59	0.09969459	105.59	0.1377396	105.59	0.07959089	105.59	0.1263035	105.59	0.1447121	105.59	-0.1892117	105.6	-0.2560426	105.6	-0.2206797	105.6	-0.2432975	105.6	-0.2052782	105.6	-0.2503039	105.6	-0.2064337	105.6	-0.2031971	105.6	-0.1965748
105.79	0.1189344	105.79	0.0824647	105.79	0.1020024	105.79	0.1414137	105.79	0.08532786	105.79	0.136537	105.79	0.1520167	105.79	-0.1895275	105.8	-0.2588756	105.8	-0.2207028	105.8	-0.2440448	105.8	-0.2108557	105.8	-0.2476653	105.8	-0.210929	105.8	-0.2085539	105.8	-0.1973744
105.99	0.1241978	105.99	0.08285813	105.99	0.1120979	105.99	0.1436771	105.99	0.08911128	105.99	0.1418122	105.99	0.1541932	105.99	-0.1921767	106	-0.253631	106	-0.2193714	106	-0.2417614	106	-0.2071135	106	-0.2459422	106	-0.214846	106	-0.1996022	106	-0.1938385
106.19	0.1281514	106.19	0.08910841	106.19	0.1139205	106.19	0.1468421	106.19	0.0922427	106.19	0.1457565	106.19	0.1530932	106.19	-0.1917618	106.2	-0.2552768	106.2	-0.2190847	106.2	-0.2453137	106.2	-0.2082122	106.2	-0.2452346	106.2	-0.2084021	106.2	-0.2070548	106.2	-0.1922985
106.39	0.1351209	106.39	0.09011787	106.39	0.1212618	106.39	0.1540482	106.39	0.1004639	106.39	0.1506972	106.39	0.166265	106.39	-0.1911936	106.4	-0.2533677	106.4	-0.2167435	106.4	-0.2399849	106.4	-0.2081018	106.4	-0.2457971	106.4	-0.208257	106.4	-0.2040494	106.4	-0.1918347
106.59	0.1392601	106.59	0.1000776	106.59	0.1259339	106.59	0.1606969	106.59	0.1031531	106.59	0.1520404	106.59	0.1717441	106.59	-0.1931172	106.6	-0.2579865	106.6	-0.2172005	106.6	-0.2398378	106.6	-0.2033679	106.6	-0.2440807	106.6	-0.2109267	106.6	-0.1981612	106.6	-0.1953833
106.79	0.137811	106.79	0.1019518	106.79	0.130202	106.79	0.1668205	106.79	0.1093098	106.79	0.1538856	106.79	0.1753889	106.79	-0.1918344	106.8	-0.252653	106.8	-0.2144901	106.8	-0.2435831	106.8	-0.2107901	106.8	-0.2446993	106.8	-0.2075339	106.8	-0.2063983	106.8	-0.1930981
106.99	0.1478386	106.99	0.1085079	106.99	0.1322751	106.99	0.1698245	106.99	0.113657	106.99	0.1665376	106.99	0.1800481	106.99	-0.1823753	107	-0.2503834	107	-0.214296	107	-0.2403684	107	-0.20845	107	-0.2438398	107	-0.2074115	107	-0.2005392	107	-0.1907697
107.19	0.150731	107.19	0.108434	107.19	0.1411714	107.19	0.1697507	107.19	0.1190506	107.19	0.1659447	107.19	0.1788909	107.19	-0.1885962	107.2	-0.2484311	107.2	-0.2174893	107.2	-0.2410811	107.2	-0.2033648	107.2	-0.2451642	107.2	-0.2068911	107.2	-0.2026828	107.2	-0.194231
107.39	0.1533239	107.39	0.11663	107.39	0.1438547	107.39	0.1743937	107.39	0.1228164	107.39	0.1707687	107.39	0.1863295	107.39	-0.1851665	107.4	-0.2572224	107.4	-0.2152292	107.4	-0.2398106	107.4	-0.2042774	107.4	-0.2445046	107.4	-0.209934	107.4	-0.2044631	107.4	-0.1913436
107.59	0.1571916	107.59	0.1215344	107.59	0.1470531	107.59	0.1820938	107.59	0.1226478	107.59	0.1778845	107.59	0.1959032	107.59	-0.1920716	107.6	-0.2526579	107.6	-0.213901	107.6	-0.2368221	107.6	-0.2058875	107.6	-0.2423319	107.6	-0.2095388	107.6	-0.2044421	107.6	-0.1917841
107.79	0.1706636	107.79	0.1245767	107.79	0.1479489	107.79	0.1793765	107.79	0.1323267	107.79	0.1808193	107.79	0.1966381	107.79	-0.1881961	107.8	-0.2517695	107.8	-0.2150855	107.8	-0.2389576	107.8	-0.2061822	107.8	-0.2422196	107.8	-0.2099468	107.8	-0.2001366	107.8	-0.1937544
107.99	0.1752378	107.99	0.132494	107.99	0.1545836	107.99	0.1957202	107.99	0.1351699	107.99	0.1870513	107.99	0.2039516	107.99	-0.1884044	108	-0.2488815	108	-0.2110408	108	-0.2384752	108	-0.204504	108	-0.2398724	108	-0.2101681	108	-0.2001144	108	-0.1939966
108.19	0.1776104	108.19	0.1319614	108.19	0.1588149	108.19	0.1940832	108.19	0.1411544	108.19	0.1893437	108.19	0.2072668	108.19	-0.1876906	108.2	-0.2545714	108.2	-0.2155382	108.2	-0.2420622	108.2	-0.2007519	108.2	-0.244151	108.2	-0.2057818	108.2	-0.2035647	108.2	-0.1931797
108.39	0.1795452	108.39	0.1378514	108.39	0.1658611	108.39	0.201373	108.39	0.1434896	108.39	0.1934227	108.39	0.2139009	108.39	-0.1879395	108.4	-0.2505991	108.4	-0.2132685	108.4	-0.2426233	108.4	-0.2004901	108.4	-0.2420714	108.4	-0.2097847	108.4	-0.2015477	108.4	-0.1940211
108.59	0.1866063	108.59	0.1440351	108.59	0.1695865	108.59	0.2036344	108.59	0.1492394	108.59	0.1982957	108.59	0.217399	108.59	-0.1870418	108.6	-0.2465565	108.6	-0.2134876	108.6	-0.2417382	108.6	-0.1981784	108.6	-0.2410769	108.6	-0.2016954	108.6	-0.1952733	108.6	-0.1938568
108.79	0.1883587	108.79	0.1500337	108.79	0.172185	108.79	0.2117557	108.79	0.1570592	108.79	0.2033096	108.79	0.2197167	108.79	-0.1775813	108.8	-0.2502953	108.8	-0.2147338	108.8	-0.2380661	108.8	-0.205554	108.8	-0.243633	108.8	-0.2009933	108.8	-0.1972396	108.8	-0.187873
108.99	0.1924808	108.99	0.1563108	108.99	0.1804245	108.99	0.2142422	108.99	0.1553033	108.99	0.2085521	108.99	0.2275154	108.99	-0.1840654	109	-0.2517489	109	-0.2145935	109	-0.2365746	109	-0.198708	109	-0.2389224	109	-0.2055911	109	-0.1993243	109	-0.1881438
109.19	0.199681	109.19	0.159949	109.19	0.1857179	109.19	0.2133467	109.19	0.1625476	109.19	0.2167837	109.19	0.2320385	109.19	-0.1843807	109.2	-0.2527996	109.2	-0.2087675	109.2	-0.2422542	109.2	-0.2010229	109.2	-0.2373593	109.2	-0.2055769	109.2	-0.1998648	109.2	-0.189334
109.39	0.1989896	109.39	0.1636412	109.39	0.1850411	109.39	0.2216044	109.39	0.165538	109.39	0.2184478	109.39	0.2350821	109.39	-0.1873536	109.4	-0.2511507	109.4	-0.2148059	109.4	-0.2383765	109.4	-0.1994729	109.4	-0.2397272	109.4	-0.2073882	109.4	-0.1997297	109.4	-0.1876749
109.59	0.2074685	109.59	0.1650834	109.59	0.1928165	109.59	0.2221392	109.59	0.1696437	109.59	0.2196486	109.59	0.2419542	109.59	-0.1812135	109.6	-0.248111	109.6	-0.2114023	109.6	-0.2366183	109.6	-0.2014711	109.6	-0.2384441	109.6	-0.204589	109.6	-0.2037024	109.6	-0.1907087
109.79	0.2073779	109.79	0.1711845	109.79	0.1992448	109.79	0.2308207	109.79	0.1726866	109.79	0.2266301	109.79	0.2374724	109.79	-0.1821567	109.8	-0.2494531	109.8	-0.2105729	109.8	-0.2384939	109.8	-0.2034641	109.8	-0.2387782	109.8	-0.2070703	109.8	-0.1986606	109.8	-0.1897187
109.99	0.219376	109.99	0.1677552	109.99	0.2023503	109.99	0.2357834	109.99	0.1823918	109.99	0.2291555	109.99	0.2485427	109.99	-0.1834685	110	-0.2533575	110	-0.2086193	110	-0.2374045	110	-0.198675	110	-0.240107	110	-0.2011618	110	-0.1999667	110	-0.1928055
110.19	0.2205959	110.19	0.1822999	110.19	0.2051019	110.19	0.2404265	110.19	0.1887936	110.19	0.241936	110.19	0.2518511	110.19	-0.1846347	110.2	-0.2485427	110.2	-0.210143	110.2	-0.2363302	110.2	-0.1989919	110.2	-0.2376717	110.2	-0.1987546	110.2	-0.2042341	110.2	-0.1852746
110.39	0.2253285	110.39	0.1834834	110.39	0.2108368	110.39	0.2445501	110.39	0.1962806	110.39	0.2370724	110.39	0.2569267	110.39	-0.1802872	110.4	-0.2468197	110.4	-0.2134649	110.4	-0.2371166	110.4	-0.1992176	110.4	-0.2406585	110.4	-0.2016523	110.4	-0.2018771	110.4	-0.1882372
110.59	0.2280354	110.59	0.1857603	110.59	0.2153296	110.59	0.2455016	110.59	0.1930251	110.59	0.2463998	110.59	0.259337	110.59	-0.1852319	110.6	-0.2497423	110.6	-0.2121581	110.6	-0.2344852	110.6	-0.1983763	110.6	-0.2371091	110.6	-0.2074098	110.6	-0.1960943	110.6	-0.1854175
110.79	0.2357914	110.79	0.1898682	110.79	0.2189759	110.79	0.2480775	110.79	0.1971798	110.79	0.2453825	110.79	0.2638785	110.79	-0.1825343	110.8	-0.249745	110.8	-0.209604	110.8	-0.2354998	110.8	-0.2016915	110.8	-0.24181	110.8	-0.2032347	110.8	-0.2022782	110.8	-0.1882596
110.99	0.2380269	110.99	0.196309	110.99	0.2234517	110.99	0.2557297	110.99	0.1977019	110.99	0.2531073	110.99	0.2724674	110.99	-0.1783164	111	-0.2466847	111	-0.2115379	111	-0.2410476	111	-0.1962793	111	-0.2391523	111	-0.200256	111	-0.1970162	111	-0.1917087
111.19	0.2449749	111.19	0.2037552	111.19	0.2288161	111.19	0.2567549	111.19	0.2055223	111.19	0.2547318	111.19	0.2782857	111.19	-0.1886168	111.2	-0.2451675	111.2	-0.2092909	111.2	-0.2386992	111.2	-0.1958465	111.2	-0.2354979	111.2	-0.2019395	111.2	-0.1957419	111.2	-0.186457
111.39	0.2495283	111.39	0.2052469	111.39	0.2338648	111.39	0.2629267	111.39	0.2102758	111.39	0.2616226	111.39	0.2789105	111.39	-0.1806124	111.4	-0.2466603	111.4	-0.2101199	111.4	-0.2327455	111.4	-0.2014502	111.4	-0.2375948	111.4	-0.20244	111.4	-0.1978269	111.4	-0.1844472
111.59	0.2504864	111.59	0.2043905	111.59	0.2337538	111.59	0.2692451	111.59	0.2148831	111.59	0.262951	111.59	0.28523	111.59	-0.1806294	111.6	-0.2495106	111.6	-0.2088674	111.6	-0.234369	111.6	-0.2026412	111.6	-0.2304346	111.6	-0.2026614	111.6	-0.1952509	111.6	-0.1893627
111.79	0.2573078	111.79	0.214997	111.79	0.2361372	111.79	0.2730575	111.79	0.2170766	111.79	0.2747985	111.79	0.2840913	111.79	-0.178147	111.8	-0.2452352	111.8	-0.212058	111.8	-0.2356456	111.8	-0.1981415	111.8	-0.2349746	111.8	-0.1995603	111.8	-0.1983951	111.8	-0.1834025
111.99	0.256363	111.99	0.2183338	111.99	0.2443089	111.99	0.2737142	111.99	0.2244902	111.99	0.2744463	111.99	0.2916302	111.99	-0.1815212	112	-0.246822	112	-0.20823	112	-0.2342456	112	-0.1990946	112	-0.2369572	112	-0.196773	112	-0.1938869	112	-0.1868459
112.19	0.2653132	112.19	0.2221	112.19	0.2472941	112.19	0.2820182	112.19	0.2256284	112.19	0.2765056	112.19	0.2960128	112.19	-0.1800129	112.2	-0.2449763	112.2	-0.20549	112.2	-0.2359219	112.2	-0.1974181	112.2	-0.2375475	112.2	-0.1994243	112.2	-0.1926721	112.2	-0.1861794
112.39	0.2672935	112.39	0.2259035	112.39	0.2541854	112.39	0.2804339	112.39	0.2255257	112.39	0.2790548	112.39	0.2958288	112.39	-0.1865846	112.4	-0.2446637	112.4	-0.2112127	112.4	-0.2304288	112.4	-0.1979463	112.4	-0.2373994	112.4	-0.1962994	112.4	-0.195153	112.4	-0.1836761
112.59	0.2706421	112.59	0.2296518	112.59	0.2583714	112.59	0.2881075	112.59	0.2365098	112.59	0.2877173	112.59	0.3071386	112.59	-0.1804268	112.6	-0.2447537	112.6	-0.2066737	112.6	-0.2372687	112.6	-0.19342	112.6	-0.236658	112.6	-0.2026272	112.6	-0.196132	112.6	-0.1865993
112.79	0.2830603	112.79	0.2344404	112.79	0.2651271	112.79	0.2961019	112.79	0.238035	112.79	0.2905909	112.79	0.3074706	112.79	-0.1793334	112.8	-0.2463226	112.8	-0.2076289	112.8	-0.2303225	112.8	-0.1991562	112.8	-0.2386618	112.8	-0.1956025	112.8	-0.1959286	112.8	-0.1824373
112.99	0.27755	112.99	0.2351447	112.99	0.269124	112.99	0.2954055	112.99	0.2452135	112.99	0.2944705	112.99	0.3118431	112.99	-0.1793346	113	-0.2477346	113	-0.2085875	113	-0.2338684	113	-0.1928765	113	-0.2375935	113	-0.1983902	113	-0.1956927	113	-0.1919861
113.19	0.2849801	113.19	0.2416611	113.19	0.2682884	113.19	0.299248	113.19	0.2537239	113.19	0.3025574	113.19	0.3135827	113.19	-0.1858481	113.2	-0.2448849	113.2	-0.2020461	113.2	-0.2280086	113.2	-0.1949118	113.2	-0.2368518	113.2	-0.1989057	113.2	-0.1869707	113.2	-0.1840405
113.39	0.2891085	113.39	0.2460341	113.39	0.2769075	113.39	0.305297	113.39	0.252834	113.39	0.3041194	113.39	0.3197632	113.39	-0.1815159	113.4	-0.2423569	113.4	-0.2113238	113.4	-0.2305962	113.4	-0.1922988	113.4	-0.2352151	113.4	-0.1962079	113.4	-0.1986784	113.4	-0.1833795
113.59	0.2914658	113.59	0.2493997	113.59	0.2793248	113.59	0.3047565	113.59	0.2557027	113.59	0.3066228	113.59	0.3241588	113.59	-0.1810172	113.6	-0.2472558	113.6	-0.2100507	113.6	-0.2336088	113.6	-0.1942961	113.6	-0.233995	113.6	-0.1984056	113.6	-0.1932997	113.6	-0.1823243
113.79	0.2994229	113.79	0.2553601	113.79	0.2780673	113.79	0.3104194	113.79	0.2619409	113.79	0.3057472	113.79	0.3292719	113.79	-0.178789	113.8	-0.243652	113.8	-0.2050072	113.8	-0.2317788	113.8	-0.1933274	113.8	-0.2343457	113.8	-0.1942212	113.8	-0.1904662	113.8	-0.1852999
113.99	0.3000221	113.99	0.2566498	113.99	0.2878062	113.99	0.3174305	113.99	0.2636081	113.99	0.3149069	113.99	0.3350547	113.99	-0.1781005	114	-0.2443845	114	-0.2070774	114	-0.2284445	114	-0.2002333	114	-0.2346714	114	-0.1948708	114	-0.1949878	114	-0.1804195
114.19	0.3022722	114.19	0.2594449	114.19	0.2900148	114.19	0.3143872	114.19	0.2720498	114.19	0.3194656	114.19	0.3353981	114.19	-0.1788384	114.22	-0.2390333	114.22	-0.2046747	114.22	-0.2296539	114.22	-0.1956834	114.22	-0.2323719	114.22	-0.1994247	114.22	-0.1939609	114.22	-0.1749113
114.39	0.3057162	114.39	0.2664739	114.39	0.2915238	114.39	0.3214127	114.39	0.2760863	114.39	0.3266902	114.39	0.3465138	114.39	-0.1807103	114.4	-0.2423311	114.4	-0.2023997	114.4	-0.2292805	114.4	-0.1938597	114.4	-0.2294147	114.4	-0.1970531	114.4	-0.192816	114.4	-0.1840308
114.59	0.3132117	114.59	0.270122	114.59	0.2969234	114.59	0.32593	114.59	0.2763345	114.59	0.3276686	114.59	0.3479705	114.59	-0.1821789	114.6	-0.2428647	114.6	-0.203512	114.6	-0.228148	114.6	-0.1919277	114.6	-0.2318333	114.6	-0.1960653	114.6	-0.1948087	114.6	-0.1795152
114.79	0.3192133	114.79	0.2801088	114.79	0.3044347	114.79	0.3308114	114.79	0.2791714	114.79	0.3341816	114.79	0.3526927	114.79	-0.1762412	114.8	-0.2401156	114.8	-0.2070603	114.8	-0.228774	114.8	-0.1930033	114.8	-0.2336388	114.8	-0.1983426	114.8	-0.1925672	114.8	-0.1823536
114.99	0.3182943	114.99	0.2757795	114.99	0.3046544	114.99	0.3364838	114.99	0.2846705	114.99	0.3332148	114.99	0.3549714	114.99	-0.1736211	115	-0.2437575	115	-0.2008902	115	-0.2309518	115	-0.190682	115	-0.232237	115	-0.1959312	115	-0.1907966	115	-0.1842734
115.19	0.324028	115.19	0.2841348	115.19	0.3108688	115.19	0.3387453	115.19	0.2878501	115.19	0.3386727	115.19	0.3591605	115.19	-0.1764892	115.2	-0.2413602	115.2	-0.198963	115.2	-0.2295073	115.2	-0.1908442	115.2	-0.2340936	115.2	-0.1943781	115.2	-0.1940474	115.2	-0.184262
115.39	0.3313205	115.39	0.2852075	115.39	0.3145373	115.39	0.3461029	115.39	0.2896484	115.39	0.3382926	115.39	0.3662764	115.39	-0.1779767	115.4	-0.2378954	115.4	-0.2024929	115.4	-0.2319491	115.4	-0.1947131	115.4	-0.2259476	115.4	-0.1946034	115.4	-0.1934712	115.4	-0.1843007
115.59	0.3311844	115.59	0.2913087	115.59	0.3179764	115.59	0.3494025	115.59	0.2951137	115.59	0.3459235	115.59	0.3669493	115.59	-0.1785487	115.6	-0.2423177	115.6	-0.2035663	115.6	-0.2278943	115.6	-0.1932427	115.6	-0.2305147	115.6	-0.1920731	115.6	-0.195529	115.6	-0.18427
115.79	0.3332989	115.79	0.294612	115.79	0.3182645	115.79	0.3504496	115.79	0.3004995	115.79	0.3513936	115.79	0.3713086	115.79	-0.1758426	115.8	-0.2416055	115.8	-0.2024302	115.8	-0.2315817	115.8	-0.1944563	115.8	-0.2331299	115.8	-0.1934508	115.8	-0.1882356	115.8	-0.1811087
115.99	0.3381258	115.99	0.2986383	115.99	0.325752	115.99	0.3541768	115.99	0.3044655	115.99	0.3544627	115.99	0.3766805	115.99	-0.1758582	116	-0.2381942	116	-0.2025561	116	-0.2312716	116	-0.1851811	116	-0.226028	116	-0.1982208	116	-0.189371	116	-0.1779792
116.19	0.3492762	116.19	0.3016913	116.19	0.3284082	116.19	0.3602133	116.19	0.308216	116.19	0.3569551	116.19	0.3812762	116.19	-0.176758	116.2	-0.2408352	116.2	-0.2013808	116.2	-0.2290378	116.2	-0.1907869	116.2	-0.2297176	116.2	-0.1931592	116.2	-0.1909028	116.2	-0.1799221
116.39	0.3494688	116.39	0.3092412	116.39	0.3332301	116.39	0.364294	116.39	0.3071963	116.39	0.3615658	116.39	0.3832932	116.39	-0.177031	116.4	-0.2356101	116.4	-0.2052802	116.4	-0.2264552	116.4	-0.1903045	116.4	-0.2312645	116.4	-0.1927455	116.4	-0.1885639	116.4	-0.1792516
116.59	0.3572183	116.59	0.3082882	116.59	0.3383299	116.59	0.3718114	116.59	0.3186796	116.59	0.3653122	116.59	0.3916303	116.59	-0.1741466	116.6	-0.2337786	116.6	-0.1999225	116.6	-0.2250751	116.6	-0.1911637	116.6	-0.2266677	116.6	-0.1941516	116.6	-0.1949361	116.6	-0.1828815
116.79	0.3590927	116.79	0.3121657	116.79	0.3420314	116.79	0.3688474	116.79	0.3183095	116.79	0.3684602	116.79	0.3908099	116.79	-0.1747229	116.8	-0.2391498	116.8	-0.2020216	116.8	-0.2264517	116.8	-0.1895877	116.8	-0.2285051	116.8	-0.1930617	116.8	-0.185962	116.8	-0.1776985
116.99	0.360607	116.99	0.3162691	116.99	0.3473321	116.99	0.3755536	116.99	0.320754	116.99	0.3739229	116.99	0.3975991	116.99	-0.1716904	117	-0.2338976	117	-0.2035776	117	-0.2220533	117	-0.1883612	117	-0.2277824	117	-0.1931463	117	-0.1875959	117	-0.1764551
117.19	0.3642102	117.19	0.3223432	117.19	0.3474362	117.19	0.3780707	117.19	0.3230959	117.19	0.3803083	117.19	0.3999397	117.19	-0.1791015	117.2	-0.2377461	117.2	-0.2030037	117.2	-0.2236605	117.2	-0.1902572	117.2	-0.2286504	117.2	-0.1890023	117.2	-0.1880107	117.2	-0.1779465
117.39	0.3689421	117.39	0.3237711	117.39	0.3529979	117.39	0.3788488	117.39	0.3304254	117.39	0.3814228	117.39	0.4028385	117.39	-0.1777454	117.4	-0.2406195	117.4	-0.2007745	117.4	-0.2262309	117.4	-0.1899732	117.4	-0.2290054	117.4	-0.1903061	117.4	-0.1886923	117.4	-0.179487
117.59	0.3719676	117.59	0.3298751	117.59	0.360455	117.59	0.3872138	117.59	0.3376705	117.59	0.3808087	117.59	0.406703	117.59	-0.1740484	117.6	-0.2355834	117.6	-0.2025521	117.6	-0.2241495	117.6	-0.1890857	117.6	-0.2282204	117.6	-0.1939216	117.6	-0.1893623	117.6	-0.1798303
117.79	0.3772885	117.79	0.333247	117.79	0.3641972	117.79	0.383942	117.79	0.3413884	117.79	0.3908596	117.79	0.4067203	117.79	-0.1726761	117.8	-0.2377982	117.8	-0.202135	117.8	-0.2229466	117.8	-0.1885353	117.8	-0.2323319	117.8	-0.1934555	117.8	-0.1867483	117.8	-0.1798064
117.99	0.3758725	117.99	0.3360733	117.99	0.362105	117.99	0.3882646	117.99	0.3408067	117.99	0.3943688	117.99	0.4151155	117.99	-0.1712616	118	-0.2322437	118	-0.1979234	118	-0.2247974	118	-0.1862728	118	-0.2235466	118	-0.1936368	118	-0.1877702	118	-0.1770525
118.19	0.3859434	118.19	0.3370717	118.19	0.3677663	118.19	0.3981235	118.19	0.3435461	118.19	0.3974025	118.19	0.420898	118.19	-0.1748723	118.2	-0.2337563	118.2	-0.201948	118.2	-0.2254865	118.2	-0.1845736	118.2	-0.2240708	118.2	-0.1912693	118.2	-0.1902542	118.2	-0.1769209
118.39	0.388972	118.39	0.3430051	118.39	0.3662239	118.39	0.397572	118.39	0.3448973	118.39	0.4018513	118.39	0.4258274	118.39	-0.1741833	118.4	-0.2361206	118.4	-0.196848	118.4	-0.2268871	118.4	-0.1920916	118.4	-0.2229892	118.4	-0.1929254	118.4	-0.1865749	118.4	-0.1714718
118.59	0.3886212	118.59	0.3459423	118.59	0.3756419	118.59	0.403704	118.59	0.3472503	118.59	0.4055827	118.59	0.4249649	118.59	-0.1729679	118.6	-0.2389227	118.6	-0.200327	118.6	-0.2211764	118.6	-0.1885566	118.6	-0.2247148	118.6	-0.1920762	118.6	-0.1877111	118.6	-0.1761707
118.79	0.3974471	118.79	0.3507675	118.79	0.3816442	118.79	0.4050742	118.79	0.3576462	118.79	0.4061404	118.79	0.4293905	118.79	-0.1735078	118.8	-0.2368361	118.8	-0.2042342	118.8	-0.2222755	118.8	-0.1879203	118.8	-0.2253886	118.8	-0.1910755	118.8	-0.1853301	118.8	-0.1762235
118.99	0.3987012	118.99	0.355326	118.99	0.3845227	118.99	0.4112627	118.99	0.3641701	118.99	0.4105001	118.99	0.4343528	118.99	-0.1718917	119	-0.2393	119	-0.1998663	119	-0.2241298	119	-0.1869753	119	-0.2217439	119	-0.1862751	119	-0.1860339	119	-0.1738107
119.19	0.4004091	119.19	0.3542624	119.19	0.382688	119.19	0.4127716	119.19	0.3643999	119.19	0.4103734	119.19	0.4299737	119.19	-0.1715876	119.2	-0.2386155	119.2	-0.1982827	119.2	-0.2214786	119.2	-0.1925093	119.2	-0.2217581	119.2	-0.1900009	119.2	-0.1826828	119.2	-0.1750287
119.39	0.4088047	119.39	0.3627388	119.39	0.3924712	119.39	0.4189108	119.39	0.370457	119.39	0.4192306	119.39	0.438392	119.39	-0.1727991	119.4	-0.2327015	119.4	-0.2003374	119.4	-0.2232862	119.4	-0.1867664	119.4	-0.2300184	119.4	-0.1882517	119.4	-0.1880217	119.4	-0.1770096
119.59	0.4115855	119.59	0.3637857	119.59	0.3958851	119.59	0.4179697	119.59	0.3724311	119.59	0.426526	119.59	0.4471813	119.59	-0.1696947	119.6	-0.2321336	119.6	-0.1936755	119.6	-0.2216025	119.6	-0.1874963	119.6	-0.2254255	119.6	-0.191669	119.6	-0.1858545	119.6	-0.1733375
119.79	0.4132327	119.79	0.3723916	119.79	0.3962924	119.79	0.421242	119.79	0.377055	119.79	0.4267738	119.79	0.4516346	119.79	-0.172735	119.8	-0.2309265	119.8	-0.1949222	119.8	-0.2210245	119.8	-0.1899829	119.8	-0.2284346	119.8	-0.1862576	119.8	-0.1814695	119.8	-0.1770773
119.99	0.4158278	119.99	0.3729745	119.99	0.4080636	119.99	0.4301947	119.99	0.3742826	119.99	0.4301429	119.99	0.4536219	119.99	-0.173627	120	-0.2368279	120	-0.1955487	120	-0.2246159	120	-0.187239	120	-0.2252848	120	-0.1900057	120	-0.1849038	120	-0.1768931
120.19	0.4176126	120.19	0.3756403	120.19	0.4034635	120.19	0.432802	120.19	0.3783661	120.19	0.4312466	120.19	0.4525153	120.19	-0.1686746	120.2	-0.2336147	120.2	-0.1968921	120.2	-0.2183849	120.2	-0.1804446	120.2	-0.223521	120.2	-0.1884208	120.2	-0.1851257	120.2	-0.1728255
120.39	0.4161685	120.39	0.3763661	120.39	0.4074969	120.39	0.4312495	120.39	0.3858636	120.39	0.4382084	120.39	0.4634399	120.39	-0.1710294	120.4	-0.2384053	120.4	-0.1915771	120.4	-0.2213796	120.4	-0.1859683	120.4	-0.2258957	120.4	-0.1884543	120.4	-0.1840157	120.4	-0.1726464
120.59	0.4264262	120.59	0.3805209	120.59	0.4127138	120.59	0.4434843	120.59	0.3896138	120.59	0.4409125	120.59	0.465753	120.59	-0.1695373	120.6	-0.2336119	120.6	-0.1908462	120.6	-0.2226688	120.6	-0.1875935	120.6	-0.2176319	120.6	-0.1832666	120.6	-0.1800039	120.6	-0.1713376
120.79	0.4314284	120.79	0.3859771	120.79	0.4136638	120.79	0.4445718	120.79	0.3959071	120.79	0.4440514	120.79	0.4650074	120.79	-0.1718074	120.8	-0.2365324	120.8	-0.1916764	120.8	-0.2155157	120.8	-0.1805563	120.8	-0.2236647	120.8	-0.18671	120.8	-0.1878656	120.8	-0.1744293
120.99	0.431162	120.99	0.3897113	120.99	0.4174385	120.99	0.4474567	120.99	0.396394	120.99	0.4473712	120.99	0.473152	120.99	-0.1696721	121	-0.2333048	121	-0.194346	121	-0.217844	121	-0.1852459	121	-0.2218905	121	-0.1848737	121	-0.183019	121	-0.1714592
121.19	0.44066	121.19	0.391479	121.19	0.4252737	121.19	0.446895	121.19	0.4004686	121.19	0.4528707	121.19	0.4755457	121.19	-0.1710446	121.2	-0.2308323	121.2	-0.1939566	121.2	-0.2217151	121.2	-0.1816798	121.2	-0.2256183	121.2	-0.1897022	121.2	-0.1822789	121.2	-0.1733622
121.39	0.4409989	121.39	0.3939858	121.39	0.4274389	121.39	0.452256	121.39	0.4049058	121.39	0.4543587	121.39	0.4758622	121.39	-0.1683559	121.4	-0.2311832	121.4	-0.1938486	121.4	-0.2215598	121.4	-0.1851964	121.4	-0.2209278	121.4	-0.1844752	121.4	-0.1827891	121.4	-0.172573
121.59	0.450954	121.59	0.3993242	121.59	0.4318897	121.59	0.4521362	121.59	0.4014991	121.59	0.4521492	121.59	0.4836548	121.59	-0.165486	121.6	-0.2292123	121.6	-0.1925827	121.6	-0.2190489	121.6	-0.1794476	121.6	-0.2190867	121.6	-0.1868905	121.6	-0.1820234	121.6	-0.1733328
121.79	0.4466076	121.79	0.4008832	121.79	0.4361321	121.79	0.4565421	121.79	0.4083521	121.79	0.4585829	121.79	0.4844629	121.79	-0.1660781	121.8	-0.233375	121.8	-0.1924602	121.8	-0.2185251	121.8	-0.1841362	121.8	-0.219718	121.8	-0.1897779	121.8	-0.1799804	121.8	-0.1765087
121.99	0.4514163	121.99	0.4005961	121.99	0.4361469	121.99	0.4564179	121.99	0.4134984	121.99	0.4629874	121.99	0.4881796	121.99	-0.1714826	122	-0.2309989	122	-0.1933615	122	-0.218541	122	-0.1841407	122	-0.2196256	122	-0.1867064	122	-0.1807007	122	-0.1724331
122.19	0.4553974	122.19	0.4110491	122.19	0.4408568	122.19	0.463705	122.19	0.4162196	122.19	0.4664536	122.19	0.4971837	122.19	-0.1678127	122.2	-0.2301069	122.2	-0.1882746	122.2	-0.2176962	122.2	-0.1837683	122.2	-0.2202013	122.2	-0.1905738	122.2	-0.1818098	122.2	-0.168915
122.39	0.4566459	122.39	0.4126897	122.39	0.4467549	122.39	0.4681297	122.39	0.4139225	122.39	0.4719556	122.39	0.4950425	122.39	-0.1680056	122.4	-0.2313191	122.4	-0.1943453	122.4	-0.2143723	122.4	-0.1843579	122.4	-0.2183378	122.4	-0.1822064	122.4	-0.1794568	122.4	-0.1674685
122.59	0.4604816	122.59	0.4140968	122.59	0.4502526	122.59	0.4660246	122.59	0.4196349	122.59	0.4786775	122.59	0.4983032	122.59	-0.169334	122.6	-0.2316057	122.6	-0.1930052	122.6	-0.2182631	122.6	-0.1839657	122.6	-0.2224477	122.6	-0.1848776	122.6	-0.1810484	122.6	-0.1680575
122.79	0.4631011	122.79	0.4200704	122.79	0.4502764	122.79	0.4739363	122.79	0.4261021	122.79	0.4793317	122.79	0.4997223	122.79	-0.1643575	122.8	-0.2311144	122.8	-0.1959262	122.8	-0.2222371	122.8	-0.1853234	122.8	-0.218854	122.8	-0.1823002	122.8	-0.1804654	122.8	-0.172071
122.99	0.4694287	122.99	0.4258671	122.99	0.4530666	122.99	0.4754296	122.99	0.4285997	122.99	0.4808641	122.99	0.5070824	122.99	-0.1622363	123	-0.2297339	123	-0.1925097	123	-0.2184454	123	-0.1834774	123	-0.2172937	123	-0.1905265	123	-0.1757556	123	-0.1727433
123.19	0.4784921	123.19	0.4236577	123.19	0.4574952	123.19	0.4822853	123.19	0.432753	123.19	0.4889553	123.19	0.5057979	123.19	-0.1689214	123.2	-0.2282387	123.2	-0.1905234	123.2	-0.2227621	123.2	-0.1834741	123.2	-0.2171493	123.2	-0.1853579	123.2	-0.1749909	123.2	-0.1680732
123.39	0.4740169	123.39	0.424874	123.39	0.4636164	123.39	0.4845769	123.39	0.4322955	123.39	0.4862252	123.39	0.5149853	123.39	-0.1656683	123.4	-0.2282858	123.4	-0.194846	123.4	-0.216044	123.4	-0.1809424	123.4	-0.2173554	123.4	-0.1834777	123.4	-0.1808379	123.4	-0.1665054
123.59	0.4797633	123.59	0.4293854	123.59	0.4644774	123.59	0.4937991	123.59	0.4435979	123.59	0.492436	123.59	0.5191198	123.59	-0.1668128	123.6	-0.2302083	123.6	-0.19197	123.6	-0.2202777	123.6	-0.1850712	123.6	-0.2154231	123.6	-0.1854445	123.6	-0.1737898	123.6	-0.1717541
123.79	0.4806786	123.79	0.4369141	123.79	0.4693059	123.79	0.4936654	123.79	0.4412882	123.79	0.4986017	123.79	0.5160704	123.79	-0.1668499	123.8	-0.2288641	123.8	-0.1967168	123.8	-0.2155383	123.8	-0.1827588	123.8	-0.2202476	123.8	-0.1804529	123.8	-0.1773222	123.8	-0.1678326
123.99	0.488116	123.99	0.4382911	123.99	0.4697315	123.99	0.4986902	123.99	0.4445401	123.99	0.4949161	123.99	0.5255195	123.99	-0.1660416	124	-0.2311788	124	-0.18987	124	-0.2157623	124	-0.1793751	124	-0.2205511	124	-0.1873051	124	-0.1802768	124	-0.1682803
124.19	0.4895358	124.19	0.4415326	124.19	0.476647	124.19	0.4980645	124.19	0.4476934	124.19	0.5011583	124.19	0.5280356	124.19	-0.1697445	124.2	-0.2313734	124.2	-0.1927249	124.2	-0.2192043	124.2	-0.1811081	124.2	-0.2153481	124.2	-0.1843021	124.2	-0.1773801	124.2	-0.1705169
124.39	0.4932866	124.39	0.4479482	124.39	0.4764421	124.39	0.5027287	124.39	0.448213	124.39	0.5045043	124.39	0.5293453	124.39	-0.1662541	124.4	-0.2293094	124.4	-0.1885897	124.4	-0.2179565	124.4	-0.1826528	124.4	-0.2171736	124.4	-0.1850352	124.4	-0.1786968	124.4	-0.1687716
124.59	0.4948134	124.59	0.4479882	124.59	0.4789031	124.59	0.505904	124.59	0.4518573	124.59	0.5068671	124.59	0.5304558	124.59	-0.1704302	124.6	-0.2300515	124.6	-0.1883425	124.6	-0.2170269	124.6	-0.1802699	124.6	-0.2180542	124.6	-0.184467	124.6	-0.1783867	124.6	-0.160993
124.79	0.5027385	124.79	0.4552892	124.79	0.4824616	124.79	0.5027699	124.79	0.4597676	124.79	0.5119736	124.79	0.5367497	124.79	-0.1638201	124.8	-0.2287142	124.8	-0.1900641	124.8	-0.2153939	124.8	-0.1780408	124.8	-0.216919	124.8	-0.1833355	124.8	-0.175631	124.8	-0.1672466
124.99	0.4985768	124.99	0.4520733	124.99	0.4800239	124.99	0.508948	124.99	0.4677886	124.99	0.5180765	124.99	0.5413282	124.99	-0.169017	125	-0.2290174	125	-0.191101	125	-0.2133041	125	-0.1781837	125	-0.2143088	125	-0.1813664	125	-0.1742534	125	-0.1690448
125.19	0.5093819	125.19	0.4615525	125.19	0.4877614	125.19	0.513149	125.19	0.4677737	125.19	0.5177313	125.19	0.5437164	125.19	-0.1649086	125.2	-0.228285	125.2	-0.1933304	125.2	-0.210383	125.2	-0.1785796	125.2	-0.2109496	125.2	-0.1795169	125.2	-0.1758806	125.2	-0.1696427
125.39	0.5077529	125.39	0.4599938	125.39	0.4946348	125.39	0.5128686	125.39	0.4657316	125.39	0.5191517	125.39	0.5506335	125.39	-0.1675519	125.4	-0.2219991	125.4	-0.1889518	125.4	-0.2199325	125.4	-0.178039	125.4	-0.213407	125.4	-0.1785191	125.4	-0.1709732	125.4	-0.1673954
125.59	0.5107135	125.59	0.4637502	125.59	0.4932636	125.59	0.5188104	125.59	0.4725794	125.59	0.5220342	125.59	0.549219	125.59	-0.1615372	125.6	-0.2265326	125.6	-0.192149	125.6	-0.2156494	125.6	-0.1768789	125.6	-0.2156778	125.6	-0.1804834	125.6	-0.1755058	125.6	-0.1708619
125.79	0.5106018	125.79	0.469317	125.79	0.500228	125.79	0.5189518	125.79	0.4723276	125.79	0.5258665	125.79	0.5521951	125.79	-0.1627432	125.8	-0.2269644	125.8	-0.1866752	125.8	-0.2125828	125.8	-0.1771845	125.8	-0.21786	125.8	-0.1802656	125.8	-0.177925	125.8	-0.167888
125.99	0.5191662	125.99	0.4700708	125.99	0.5003155	125.99	0.5292456	125.99	0.4802897	125.99	0.5289669	125.99	0.5598801	125.99	-0.1657591	126	-0.2288918	126	-0.1917302	126	-0.2135117	126	-0.1771863	126	-0.2142235	126	-0.1794906	126	-0.1741145	126	-0.1704544
126.19	0.5198343	126.19	0.4727424	126.19	0.5038765	126.19	0.5281999	126.19	0.474538	126.19	0.5346169	126.19	0.5603608	126.19	-0.1619324	126.2	-0.22814	126.2	-0.1874733	126.2	-0.216128	126.2	-0.1780061	126.2	-0.2144713	126.2	-0.1813747	126.2	-0.1708747	126.2	-0.171428
126.39	0.5241506	126.39	0.473998	126.39	0.5108653	126.39	0.5282201	126.39	0.4852805	126.39	0.5361943	126.39	0.5651212	126.39	-0.1647397	126.4	-0.2252121	126.4	-0.1863104	126.4	-0.2144353	126.4	-0.1693018	126.4	-0.2138046	126.4	-0.1806406	126.4	-0.1735746	126.4	-0.1635771
126.59	0.527415	126.59	0.4748695	126.59	0.5045645	126.59	0.5356943	126.59	0.4893708	126.59	0.5380097	126.59	0.5653476	126.59	-0.1642529	126.6	-0.223918	126.6	-0.1924175	126.6	-0.2090802	126.6	-0.178261	126.6	-0.2156798	126.6	-0.1787832	126.6	-0.1771459	126.6	-0.1623032
126.79	0.5286993	126.79	0.4802534	126.79	0.5168678	126.79	0.539613	126.79	0.4849558	126.79	0.5444346	126.79	0.5709273	126.79	-0.1595884	126.8	-0.2243061	126.8	-0.1854129	126.8	-0.2131365	126.8	-0.1790523	126.8	-0.2162322	126.8	-0.1790632	126.8	-0.1763311	126.8	-0.1620855
126.99	0.5330615	126.99	0.4848777	126.99	0.5177103	126.99	0.5367226	126.99	0.4895883	126.99	0.5435141	126.99	0.5686527	126.99	-0.1628947	127	-0.2220682	127	-0.1855879	127	-0.2091053	127	-0.1786125	127	-0.2092854	127	-0.1769437	127	-0.1750636	127	-0.1642566
127.19	0.5365741	127.19	0.4875995	127.19	0.5208275	127.19	0.5438154	127.19	0.4915436	127.19	0.5472154	127.19	0.5735952	127.19	-0.1677295	127.2	-0.2272442	127.2	-0.1863374	127.2	-0.2112925	127.2	-0.1707393	127.2	-0.2131552	127.2	-0.175657	127.2	-0.1729498	127.2	-0.165566
127.39	0.5356607	127.39	0.4898162	127.39	0.5252149	127.39	0.5451198	127.39	0.4986033	127.39	0.551854	127.39	0.5769544	127.39	-0.1602347	127.4	-0.2223032	127.4	-0.1837216	127.4	-0.2122321	127.4	-0.1721947	127.4	-0.2121214	127.4	-0.1799772	127.4	-0.174439	127.4	-0.1691705
127.59	0.5456631	127.59	0.492525	127.59	0.525021	127.59	0.5541455	127.59	0.4987199	127.59	0.551418	127.59	0.5799581	127.59	-0.1661875	127.6	-0.228323	127.6	-0.1881422	127.6	-0.2146831	127.6	-0.1768597	127.6	-0.2145519	127.6	-0.1769641	127.6	-0.1750323	127.6	-0.1626022
127.79	0.5479518	127.79	0.4934943	127.79	0.5266178	127.79	0.553238	127.79	0.5053723	127.79	0.5558778	127.79	0.5808677	127.79	-0.1629164	127.8	-0.2281384	127.8	-0.1858431	127.8	-0.2148645	127.8	-0.1747837	127.8	-0.2146684	127.8	-0.1783222	127.8	-0.1727545	127.8	-0.1641356
127.99	0.5521309	127.99	0.500788	127.99	0.5387791	127.99	0.5559171	127.99	0.5056437	127.99	0.5603613	127.99	0.586025	127.99	-0.162546	128	-0.2166456	128	-0.183238	128	-0.2109061	128	-0.1760206	128	-0.2063444	128	-0.1782643	128	-0.1690519	128	-0.1623897
128.19	0.553114	128.19	0.5027382	128.19	0.5372247	128.19	0.5585657	128.19	0.5098534	128.19	0.5643838	128.19	0.5893227	128.19	-0.1619348	128.2	-0.2235087	128.2	-0.1835918	128.2	-0.2095324	128.2	-0.1773303	128.2	-0.2114304	128.2	-0.1771105	128.2	-0.1691911	128.2	-0.1652142
128.39	0.553609	128.39	0.5025891	128.39	0.5342224	128.39	0.5605605	128.39	0.5138279	128.39	0.5682212	128.39	0.5994062	128.39	-0.163783	128.4	-0.2244374	128.4	-0.1880259	128.4	-0.2102345	128.4	-0.1761883	128.4	-0.2108228	128.4	-0.1750821	128.4	-0.1711831	128.4	-0.1614972
128.59	0.5566915	128.59	0.5060965	128.59	0.5389495	128.59	0.5620749	128.59	0.5134726	128.59	0.5716326	128.59	0.5947775	128.59	-0.1587037	128.6	-0.2252548	128.6	-0.1852924	128.6	-0.2117976	128.6	-0.1730781	128.6	-0.2077525	128.6	-0.1773588	128.6	-0.173608	128.6	-0.1656007
128.79	0.5590954	128.79	0.5114798	128.79	0.541862	128.79	0.5673679	128.79	0.5179077	128.79	0.573872	128.79	0.5994245	128.79	-0.1603032	128.8	-0.221237	128.8	-0.184774	128.8	-0.2112263	128.8	-0.1716799	128.8	-0.2119832	128.8	-0.1796743	128.8	-0.1761089	128.8	-0.1632739
128.99	0.5651839	128.99	0.5146056	128.99	0.5453627	128.99	0.5705004	128.99	0.5190544	128.99	0.5767484	128.99	0.6031547	128.99	-0.1616864	129	-0.2236261	129	-0.1855972	129	-0.2126344	129	-0.1762586	129	-0.2113493	129	-0.1790991	129	-0.1717281	129	-0.1607616
129.19	0.5632574	129.19	0.5179281	129.19	0.5474207	129.19	0.5728048	129.19	0.51842	129.19	0.5799955	129.19	0.6057759	129.19	-0.1648279	129.2	-0.2259549	129.2	-0.1835509	129.2	-0.2105524	129.2	-0.1765283	129.2	-0.2134982	129.2	-0.174845	129.2	-0.1700012	129.2	-0.1636273
129.4	0.5679539	129.4	0.5172266	129.4	0.5528106	129.4	0.5777829	129.4	0.529895	129.4	0.5815035	129.4	0.6078647	129.4	-0.1581022	129.4	-0.2186605	129.4	-0.1802075	129.4	-0.211933	129.4	-0.1781017	129.4	-0.2133875	129.4	-0.1752311	129.4	-0.1701432	129.4	-0.1646555
129.59	0.5723026	129.59	0.5247562	129.59	0.5548612	129.59	0.5751022	129.59	0.5258419	129.59	0.5827682	129.59	0.6136801	129.59	-0.1593134	129.6	-0.220104	129.6	-0.1844429	129.6	-0.2140544	129.6	-0.1734008	129.6	-0.2139555	129.6	-0.1787938	129.6	-0.1737405	129.6	-0.1692169
129.79	0.5787954	129.79	0.5212173	129.79	0.5552161	129.79	0.5784456	129.79	0.531075	129.79	0.5897599	129.79	0.6128805	129.79	-0.1626709	129.8	-0.2230402	129.8	-0.1807988	129.8	-0.2140295	129.8	-0.1741033	129.8	-0.2101005	129.8	-0.1789886	129.8	-0.1685541	129.8	-0.1633479
129.99	0.5804397	129.99	0.5240647	129.99	0.558431	129.99	0.5793091	129.99	0.5385394	129.99	0.5899921	129.99	0.6174176	129.99	-0.1639716	130	-0.2212083	130	-0.1850405	130	-0.2036851	130	-0.1768443	130	-0.2095426	130	-0.1754496	130	-0.1673624	130	-0.165851
130.19	0.580617	130.19	0.5266312	130.19	0.5618235	130.19	0.5851316	130.19	0.5406534	130.19	0.5914544	130.19	0.6190965	130.19	-0.1536418	130.2	-0.2246779	130.2	-0.1851826	130.2	-0.2124854	130.2	-0.1725813	130.2	-0.207328	130.2	-0.1759943	130.2	-0.1697747	130.2	-0.1624648
130.39	0.5817009	130.39	0.5325744	130.39	0.5661851	130.39	0.588698	130.39	0.536387	130.39	0.5968133	130.39	0.6206983	130.39	-0.1618272	130.4	-0.2230755	130.4	-0.1803201	130.4	-0.2085882	130.4	-0.171761	130.4	-0.210402	130.4	-0.1760797	130.4	-0.1706416	130.4	-0.1627595
130.59	0.585555	130.59	0.5353127	130.59	0.5657362	130.59	0.5956893	130.59	0.5438548	130.59	0.599022	130.59	0.6268172	130.59	-0.1630094	130.6	-0.2152885	130.6	-0.1804214	130.6	-0.2069241	130.6	-0.1701331	130.6	-0.2074183	130.6	-0.1773105	130.6	-0.1661748	130.6	-0.1639185
130.79	0.58138	130.79	0.5332662	130.79	0.5676705	130.79	0.5977089	130.79	0.5446438	130.79	0.6027643	130.79	0.6228695	130.79	-0.1593738	130.8	-0.2194249	130.8	-0.180527	130.8	-0.2105478	130.8	-0.1742658	130.8	-0.2064984	130.8	-0.1755342	130.8	-0.1674472	130.8	-0.1591499
130.99	0.5944793	130.99	0.5397805	130.99	0.5782099	130.99	0.5982198	130.99	0.5508343	130.99	0.6019014	130.99	0.6338702	130.99	-0.1636102	131	-0.2216567	131	-0.1855085	131	-0.2088471	131	-0.1731314	131	-0.2079854	131	-0.1715667	131	-0.1737964	131	-0.1642334
131.19	0.5936592	131.19	0.5409955	131.19	0.5771893	131.19	0.5974846	131.19	0.5504178	131.19	0.6028691	131.19	0.6354558	131.19	-0.1586771	131.2	-0.2201733	131.2	-0.1813767	131.2	-0.2060088	131.2	-0.1691514	131.2	-0.2104486	131.2	-0.171244	131.2	-0.1703204	131.2	-0.1644432
131.39	0.5982736	131.39	0.5455013	131.39	0.5835404	131.39	0.6023746	131.39	0.5522426	131.39	0.6093577	131.39	0.6364943	131.39	-0.1576436	131.4	-0.2211	131.4	-0.1829104	131.4	-0.2068014	131.4	-0.1709117	131.4	-0.2074878	131.4	-0.1769409	131.4	-0.1655309	131.4	-0.1584087
131.59	0.6020964	131.59	0.5489593	131.59	0.582016	131.59	0.6002946	131.59	0.5608497	131.59	0.6117643	131.59	0.6386572	131.59	-0.1580261	131.6	-0.2140142	131.6	-0.1817825	131.6	-0.2053604	131.6	-0.1698018	131.6	-0.2081813	131.6	-0.1731398	131.6	-0.1738153	131.6	-0.1610251
131.79	0.6024772	131.79	0.5497057	131.79	0.5862528	131.79	0.6072414	131.79	0.5574864	131.79	0.615173	131.79	0.6463591	131.79	-0.1583323	131.8	-0.2192149	131.8	-0.1786197	131.8	-0.2069211	131.8	-0.1707725	131.8	-0.2059086	131.8	-0.1719659	131.8	-0.1699235	131.8	-0.1603867
131.99	0.6036756	131.99	0.5512109	131.99	0.5865531	131.99	0.6080007	131.99	0.5612606	131.99	0.6206911	131.99	0.6463249	131.99	-0.1584443	132	-0.2213993	132	-0.1779463	132	-0.2057091	132	-0.1699826	132	-0.2088052	132	-0.1708047	132	-0.1684466	132	-0.1592829
132.19	0.6074033	132.19	0.5585198	132.19	0.5955717	132.19	0.6116181	132.19	0.5628325	132.19	0.621415	132.19	0.6522104	132.19	-0.1550759	132.2	-0.2177795	132.2	-0.1792475	132.2	-0.2082621	132.2	-0.1715417	132.2	-0.2043067	132.2	-0.1706493	132.2	-0.1748905	132.2	-0.156079
132.39	0.6129558	132.39	0.55833	132.39	0.5954629	132.39	0.6129037	132.39	0.5661581	132.39	0.6246586	132.39	0.6498193	132.39	-0.1609359	132.4	-0.2206917	132.4	-0.1784817	132.4	-0.2048394	132.4	-0.1710229	132.4	-0.2070982	132.4	-0.1741561	132.4	-0.1637296	132.4	-0.163743
132.59	0.6109526	132.59	0.5602493	132.59	0.5964797	132.59	0.6145501	132.59	0.5722941	132.59	0.626229	132.59	0.6528724	132.59	-0.1598618	132.6	-0.219839	132.6	-0.1813079	132.6	-0.2095603	132.6	-0.1711935	132.6	-0.2064833	132.6	-0.1697236	132.6	-0.1667881	132.6	-0.1590645
132.79	0.6145041	132.79	0.5663559	132.79	0.599931	132.79	0.6229983	132.79	0.5726613	132.79	0.6259493	132.79	0.6567172	132.79	-0.1574582	132.8	-0.2214538	132.8	-0.1805991	132.8	-0.2068182	132.8	-0.1717314	132.8	-0.2096179	132.8	-0.1750771	132.8	-0.1682903	132.8	-0.1576367
132.99	0.6176685	132.99	0.5707059	132.99	0.599447	132.99	0.6263787	132.99	0.5689498	132.99	0.6273341	132.99	0.6589673	132.99	-0.1591943	133	-0.2174854	133	-0.1807151	133	-0.2029485	133	-0.1646347	133	-0.2064517	133	-0.1747167	133	-0.164772	133	-0.1635637
133.19	0.6195229	133.19	0.5689026	133.19	0.6079562	133.19	0.6261122	133.19	0.5714832	133.19	0.6314763	133.19	0.6574178	133.19	-0.1558492	133.2	-0.2221872	133.2	-0.1798756	133.2	-0.2095598	133.2	-0.1679899	133.2	-0.2093094	133.2	-0.1718127	133.2	-0.1653954	133.2	-0.1579265
133.39	0.6240755	133.39	0.5744704	133.39	0.6013278	133.39	0.6307311	133.39	0.5779673	133.39	0.6393664	133.39	0.6676565	133.39	-0.1544332	133.4	-0.2197917	133.4	-0.1777564	133.4	-0.2068104	133.4	-0.1677878	133.4	-0.2007608	133.4	-0.1722153	133.4	-0.1650209	133.4	-0.161193
133.59	0.6303105	133.59	0.5716297	133.59	0.6094417	133.59	0.6349201	133.59	0.584231	133.59	0.6377044	133.59	0.6657178	133.59	-0.1603221	133.6	-0.2182357	133.6	-0.1817792	133.6	-0.2033804	133.6	-0.1696813	133.6	-0.2045005	133.6	-0.17239	133.6	-0.1663241	133.6	-0.1552861
133.79	0.6308953	133.79	0.5826153	133.79	0.6106475	133.79	0.6328626	133.79	0.5825307	133.79	0.6420078	133.79	0.666572	133.79	-0.1536481	133.8	-0.2159114	133.8	-0.1772637	133.8	-0.2091002	133.8	-0.1673167	133.8	-0.2048324	133.8	-0.1672865	133.8	-0.1656791	133.8	-0.1621307
133.99	0.630087	133.99	0.5800596	133.99	0.6186163	133.99	0.6349743	133.99	0.5930064	133.99	0.6422426	133.99	0.670481	133.99	-0.1577458	134	-0.2185632	134	-0.1772759	134	-0.2057001	134	-0.1700166	134	-0.2067729	134	-0.1733901	134	-0.1630193	134	-0.1598647
134.19	0.6319555	134.19	0.5888923	134.19	0.6186795	134.19	0.636865	134.19	0.5923252	134.19	0.6480483	134.19	0.6754422	134.19	-0.1540083	134.2	-0.2185267	134.2	-0.1794858	134.2	-0.2037254	134.2	-0.1684391	134.2	-0.2019807	134.2	-0.1688054	134.2	-0.1648515	134.2	-0.1591144
134.39	0.6349361	134.39	0.5821719	134.39	0.6224117	134.39	0.6448352	134.39	0.5955325	134.39	0.6484671	134.39	0.6823854	134.39	-0.1533656	134.4	-0.2128314	134.4	-0.1791957	134.4	-0.2062465	134.4	-0.1670565	134.4	-0.2048518	134.4	-0.1686505	134.4	-0.1688535	134.4	-0.1556594
134.59	0.6426052	134.59	0.5853041	134.59	0.62274	134.59	0.6418106	134.59	0.5932876	134.59	0.6496456	134.59	0.6806841	134.59	-0.1499477	134.6	-0.2169354	134.6	-0.1764235	134.6	-0.2048647	134.6	-0.1667646	134.6	-0.2027963	134.6	-0.1726935	134.6	-0.1650849	134.6	-0.1543563
134.79	0.641934	134.79	0.593649	134.79	0.6242797	134.79	0.6437808	134.79	0.5995265	134.79	0.6529529	134.79	0.6847844	134.79	-0.1532847	134.8	-0.2157463	134.8	-0.1782388	134.8	-0.2031335	134.8	-0.16823	134.8	-0.2051702	134.8	-0.1698689	134.8	-0.1573438	134.8	-0.1603892
134.99	0.6426107	134.99	0.591349	134.99	0.6259297	134.99	0.652392	134.99	0.6005277	134.99	0.6609306	134.99	0.6850673	134.99	-0.1590772	135	-0.2117892	135	-0.176314	135	-0.2020644	135	-0.1655864	135	-0.2026019	135	-0.1687975	135	-0.1646293	135	-0.1552608
135.19	0.6486857	135.19	0.5959012	135.19	0.6342729	135.19	0.650578	135.19	0.6024818	135.19	0.659345	135.19	0.6875933	135.19	-0.1546798	135.2	-0.2167718	135.2	-0.1781503	135.2	-0.2056793	135.2	-0.1667899	135.2	-0.204597	135.2	-0.1709211	135.2	-0.1654706	135.2	-0.1543779
135.39	0.6455367	135.39	0.5949918	135.39	0.6321538	135.39	0.6510541	135.39	0.6009482	135.39	0.6628312	135.39	0.6921248	135.39	-0.156725	135.4	-0.2141731	135.4	-0.1746348	135.4	-0.2009929	135.4	-0.1664861	135.4	-0.2046357	135.4	-0.1692142	135.4	-0.1609915	135.4	-0.1584936
135.59	0.6521605	135.59	0.5951011	135.59	0.6382444	135.59	0.6521191	135.59	0.6076288	135.59	0.6661627	135.59	0.6933928	135.59	-0.153053	135.6	-0.2114125	135.6	-0.1755595	135.6	-0.1998992	135.6	-0.1683911	135.6	-0.2040505	135.6	-0.1693818	135.6	-0.1649547	135.6	-0.1613417
135.79	0.6555456	135.79	0.6039003	135.79	0.6338489	135.79	0.6620322	135.79	0.6084115	135.79	0.666491	135.79	0.6946999	135.79	-0.1592771	135.8	-0.2173795	135.8	-0.1760303	135.8	-0.2046432	135.8	-0.1645355	135.8	-0.2054286	135.8	-0.1681278	135.8	-0.1633996	135.8	-0.1567792
135.99	0.657067	135.99	0.6010002	135.99	0.6382477	135.99	0.6616666	135.99	0.6118356	135.99	0.6742195	135.99	0.6957933	135.99	-0.155616	136	-0.2117004	136	-0.174119	136	-0.2039841	136	-0.1672872	136	-0.2087412	136	-0.1654699	136	-0.16298	136	-0.1569097
136.19	0.6609505	136.19	0.6073856	136.19	0.6443331	136.19	0.6689194	136.19	0.619766	136.19	0.6749216	136.19	0.6994748	136.19	-0.1531881	136.2	-0.2133097	136.2	-0.1742973	136.2	-0.2010472	136.2	-0.1669073	136.2	-0.2037398	136.2	-0.1689665	136.2	-0.1651417	136.2	-0.1593685
136.39	0.6618592	136.39	0.6119482	136.39	0.6435803	136.39	0.6681346	136.39	0.6201279	136.39	0.6764067	136.39	0.698452	136.39	-0.1483776	136.4	-0.2135242	136.4	-0.1716765	136.4	-0.1991972	136.4	-0.1629864	136.4	-0.2042238	136.4	-0.169919	136.4	-0.1637656	136.4	-0.1522002
136.59	0.659737	136.59	0.6156349	136.59	0.6471864	136.59	0.6656557	136.59	0.6210949	136.59	0.6719436	136.59	0.7047331	136.59	-0.152311	136.6	-0.2153835	136.6	-0.1760628	136.6	-0.1984443	136.6	-0.1651896	136.6	-0.2000288	136.6	-0.1628342	136.6	-0.1656498	136.6	-0.1531961
136.79	0.6648645	136.79	0.6119195	136.79	0.6509485	136.79	0.6705732	136.79	0.6237792	136.79	0.6770419	136.79	0.7111145	136.79	-0.1548347	136.8	-0.2119051	136.8	-0.1767963	136.8	-0.1988325	136.8	-0.1652367	136.8	-0.2048153	136.8	-0.1698927	136.8	-0.161322	136.8	-0.1537495
136.99	0.6670686	136.99	0.618276	136.99	0.6542335	136.99	0.6737174	136.99	0.6221557	136.99	0.6813146	136.99	0.713262	136.99	-0.1518352	137	-0.2153235	137	-0.1731144	137	-0.1989777	137	-0.1643822	137	-0.2010767	137	-0.1642196	137	-0.1617652	137	-0.1583744
137.19	0.6683802	137.19	0.6181678	137.19	0.6540809	137.19	0.675175	137.19	0.6271244	137.19	0.6869424	137.19	0.7112402	137.19	-0.1569545	137.2	-0.2115081	137.2	-0.1807942	137.2	-0.2012958	137.2	-0.1657725	137.2	-0.2025938	137.2	-0.1670705	137.2	-0.1628728	137.2	-0.1517115
137.39	0.6746448	137.39	0.6284211	137.39	0.659998	137.39	0.6719649	137.39	0.6268954	137.39	0.6840771	137.39	0.7132798	137.39	-0.1565936	137.4	-0.2105381	137.4	-0.1723987	137.4	-0.2040553	137.4	-0.1645277	137.4	-0.1953882	137.4	-0.1680835	137.4	-0.1614123	137.4	-0.154957
137.59	0.6797214	137.59	0.6245258	137.59	0.6579527	137.59	0.6811044	137.59	0.632475	137.59	0.6901729	137.59	0.7230849	137.59	-0.1491507	137.6	-0.2120888	137.6	-0.171035	137.6	-0.2007741	137.6	-0.1668631	137.6	-0.1960571	137.6	-0.1655445	137.6	-0.1642268	137.6	-0.1511292
137.79	0.6739005	137.79	0.6257048	137.79	0.6675415	137.79	0.6815107	137.79	0.6332896	137.79	0.6912756	137.79	0.7192333	137.79	-0.1484526	137.8	-0.2071969	137.8	-0.1721814	137.8	-0.2013439	137.8	-0.1600579	137.8	-0.2019493	137.8	-0.1691879	137.8	-0.161657	137.8	-0.1523463
137.99	0.6777962	137.99	0.6238999	137.99	0.6625164	137.99	0.685338	137.99	0.6340284	137.99	0.6925834	137.99	0.722621	137.99	-0.151616	138	-0.2112177	138	-0.1753905	138	-0.1983283	138	-0.1627336	138	-0.1986313	138	-0.1677988	138	-0.1592683	138	-0.1509449
138.19	0.6842651	138.19	0.6297072	138.19	0.6681562	138.19	0.6838342	138.19	0.6424436	138.19	0.6951126	138.19	0.7236453	138.19	-0.1499395	138.2	-0.2127395	138.2	-0.1785976	138.2	-0.1973766	138.2	-0.1646145	138.2	-0.2000949	138.2	-0.1658089	138.2	-0.1627677	138.2	-0.1514863
138.39	0.6840011	138.39	0.636339	138.39	0.6708465	138.39	0.6893381	138.39	0.6422345	138.39	0.6958067	138.39	0.728031	138.39	-0.1517046	138.4	-0.2095946	138.4	-0.1772114	138.4	-0.2021573	138.4	-0.1621869	138.4	-0.1976157	138.4	-0.1673686	138.4	-0.1586257	138.4	-0.1535888
138.59	0.6839926	138.59	0.6357586	138.59	0.6703232	138.59	0.6889784	138.59	0.638925	138.59	0.6983723	138.59	0.7257358	138.59	-0.1497799	138.6	-0.2128248	138.6	-0.1722587	138.6	-0.2000209	138.6	-0.1598474	138.6	-0.195462	138.6	-0.1636135	138.6	-0.1596598	138.6	-0.1499904
138.79	0.6889312	138.79	0.6336995	138.79	0.672094	138.79	0.7007406	138.79	0.6425186	138.79	0.7048683	138.79	0.7372394	138.79	-0.1519825	138.8	-0.2143014	138.8	-0.1731699	138.8	-0.1987679	138.8	-0.1618008	138.8	-0.2053729	138.8	-0.1663957	138.8	-0.1627105	138.8	-0.154653
138.99	0.6936922	138.99	0.6366665	138.99	0.6760805	138.99	0.6947535	138.99	0.6523332	138.99	0.707921	138.99	0.7308742	138.99	-0.1542953	139	-0.2140881	139	-0.1734356	139	-0.1975703	139	-0.1597309	139	-0.2039229	139	-0.1616854	139	-0.1560241	139	-0.1546564
139.19	0.7025686	139.19	0.6435134	139.19	0.6778902	139.19	0.6995463	139.19	0.6542155	139.19	0.7092902	139.19	0.7338099	139.19	-0.1510923	139.2	-0.2095779	139.2	-0.168136	139.2	-0.2011389	139.2	-0.1596467	139.2	-0.1998875	139.2	-0.1627468	139.2	-0.1604185	139.2	-0.1515098
139.39	0.6944674	139.39	0.6478091	139.39	0.6816369	139.39	0.6988328	139.39	0.6535909	139.39	0.7103717	139.39	0.7377696	139.39	-0.1508935	139.4	-0.2157328	139.4	-0.1744578	139.4	-0.2018204	139.4	-0.1605432	139.4	-0.1987738	139.4	-0.1689327	139.4	-0.1591566	139.4	-0.1564063
139.59	0.6989785	139.59	0.643393	139.59	0.6844622	139.59	0.7030782	139.59	0.6534786	139.59	0.7092054	139.59	0.7439331	139.59	-0.1488532	139.6	-0.2107368	139.6	-0.1716835	139.6	-0.201338	139.6	-0.1608355	139.6	-0.2014559	139.6	-0.166165	139.6	-0.1569766	139.6	-0.1521081
139.79	0.6977158	139.79	0.6431606	139.79	0.6820381	139.79	0.7034427	139.79	0.6569002	139.79	0.7136711	139.79	0.7474465	139.79	-0.1483656	139.8	-0.2081873	139.8	-0.1702114	139.8	-0.2001073	139.8	-0.1583688	139.8	-0.199128	139.8	-0.1625978	139.8	-0.1565683	139.8	-0.1520158
139.99	0.707651	139.99	0.6481265	139.99	0.6881297	139.99	0.7059716	139.99	0.659966	139.99	0.7190045	139.99	0.7472617	139.99	-0.1480774	140	-0.2079024	140	-0.1725791	140	-0.1937992	140	-0.1573436	140	-0.2021196	140	-0.1651037	140	-0.1577786	140	-0.1537267
140.19	0.7036628	140.19	0.6542914	140.19	0.6876912	140.19	0.7106569	140.19	0.6621338	140.19	0.7151979	140.19	0.7485963	140.19	-0.1524816	140.2	-0.2086343	140.2	-0.1709579	140.2	-0.2003545	140.2	-0.1595204	140.2	-0.1968804	140.2	-0.1620272	140.2	-0.1549684	140.2	-0.1487788
140.4	0.7056056	140.4	0.6542707	140.4	0.6886351	140.4	0.71191	140.4	0.6569842	140.4	0.7182599	140.4	0.7546355	140.4	-0.1522332	140.4	-0.2077514	140.4	-0.1743139	140.4	-0.1969993	140.4	-0.1615693	140.4	-0.201046	140.4	-0.1647834	140.4	-0.1599323	140.4	-0.151162
140.59	0.7119307	140.59	0.6544546	140.59	0.6941161	140.59	0.7149627	140.59	0.6660014	140.59	0.7229505	140.59	0.7543768	140.59	-0.1447287	140.6	-0.2129065	140.6	-0.1726366	140.6	-0.1984944	140.6	-0.1565472	140.6	-0.1964172	140.6	-0.1637299	140.6	-0.1614679	140.6	-0.1455492
140.79	0.7124558	140.79	0.6548321	140.79	0.6981665	140.79	0.7165031	140.79	0.6667591	140.79	0.7201708	140.79	0.7549334	140.79	-0.1503255	140.8	-0.2081737	140.8	-0.1718744	140.8	-0.1991429	140.8	-0.1621647	140.8	-0.198293	140.8	-0.1642019	140.8	-0.1560984	140.8	-0.1526797
140.99	0.7129474	140.99	0.6605127	140.99	0.6988682	140.99	0.7197269	140.99	0.6738805	140.99	0.720599	140.99	0.7567219	140.99	-0.1487236	141	-0.2117885	141	-0.1757666	141	-0.1946384	141	-0.160256	141	-0.1989339	141	-0.1621647	141	-0.1571402	141	-0.149218
141.19	0.7177701	141.19	0.6628136	141.19	0.7009094	141.19	0.7217494	141.19	0.6701882	141.19	0.7294771	141.19	0.7611975	141.19	-0.1509954	141.2	-0.2113699	141.2	-0.1702081	141.2	-0.1959023	141.2	-0.1615715	141.2	-0.1968417	141.2	-0.160851	141.2	-0.1588069	141.2	-0.1503744
141.39	0.7245495	141.39	0.6642837	141.39	0.7028796	141.39	0.7200323	141.39	0.6715186	141.39	0.7331396	141.39	0.7612073	141.39	-0.1471376	141.4	-0.2072143	141.4	-0.1723223	141.4	-0.1966503	141.4	-0.159507	141.4	-0.2044834	141.4	-0.1623517	141.4	-0.1640933	141.4	-0.151411
141.59	0.7190711	141.59	0.6653485	141.59	0.7031834	141.59	0.7221819	141.59	0.6739196	141.59	0.7286716	141.59	0.7642149	141.59	-0.147861	141.6	-0.2061872	141.6	-0.1721043	141.6	-0.1930753	141.6	-0.1560046	141.6	-0.1983057	141.6	-0.1586302	141.6	-0.1585359	141.6	-0.1484286
141.79	0.7215762	141.79	0.6674287	141.79	0.704807	141.79	0.7309964	141.79	0.6774106	141.79	0.7339634	141.79	0.7695807	141.79	-0.1440871	141.8	-0.207403	141.8	-0.1672732	141.8	-0.1944311	141.8	-0.1634961	141.8	-0.1990587	141.8	-0.159627	141.8	-0.1550377	141.8	-0.1500457
141.99	0.7267548	141.99	0.6705062	141.99	0.7075475	141.99	0.73093	141.99	0.6791289	141.99	0.7315366	141.99	0.7695614	141.99	-0.1480977	142	-0.21259	142	-0.1718287	142	-0.1974266	142	-0.1609788	142	-0.195991	142	-0.158905	142	-0.154229	142	-0.149316
142.19	0.7258167	142.19	0.6688319	142.19	0.7126777	142.19	0.7308096	142.19	0.6791921	142.19	0.7400687	142.19	0.7693259	142.19	-0.1479834	142.2	-0.2100901	142.2	-0.1712693	142.2	-0.201359	142.2	-0.1612568	142.2	-0.1964314	142.2	-0.1616639	142.2	-0.1560954	142.2	-0.1471574
142.39	0.7256417	142.39	0.6732984	142.39	0.7092243	142.39	0.7316877	142.39	0.6837388	142.39	0.7434986	142.39	0.7704991	142.39	-0.1504901	142.4	-0.2071557	142.4	-0.1691248	142.4	-0.195668	142.4	-0.159335	142.4	-0.1991175	142.4	-0.1624277	142.4	-0.1555171	142.4	-0.152312
142.59	0.7329131	142.59	0.6733317	142.59	0.7154359	142.59	0.7354285	142.59	0.686767	142.59	0.7445241	142.59	0.7710953	142.59	-0.1493973	142.6	-0.2086319	142.6	-0.1685139	142.6	-0.195809	142.6	-0.1602212	142.6	-0.1952069	142.6	-0.1613029	142.6	-0.1589078	142.6	-0.1471616
142.79	0.7323983	142.79	0.6805425	142.79	0.7192354	142.79	0.7413313	142.79	0.6891128	142.79	0.7477697	142.79	0.7766665	142.79	-0.1457092	142.8	-0.2074443	142.8	-0.1692844	142.8	-0.2008823	142.8	-0.1606148	142.8	-0.1946813	142.8	-0.1629376	142.8	-0.1547164	142.8	-0.149387
142.99	0.7344535	142.99	0.6786811	142.99	0.7217432	142.99	0.7376239	142.99	0.6906601	142.99	0.7512913	142.99	0.7771744	142.99	-0.1471	143	-0.205835	143	-0.1667911	143	-0.1954401	143	-0.1602857	143	-0.1937905	143	-0.165317	143	-0.1571255	143	-0.1482786
143.19	0.7412202	143.19	0.6787539	143.19	0.7190712	143.19	0.738286	143.19	0.6944898	143.19	0.7513382	143.19	0.7818998	143.19	-0.1439177	143.2	-0.2060236	143.2	-0.1678384	143.2	-0.1937313	143.2	-0.1608484	143.2	-0.1976689	143.2	-0.1611457	143.2	-0.1545685	143.2	-0.1474238
143.39	0.742624	143.39	0.6810749	143.39	0.7261424	143.39	0.7403086	143.39	0.6967056	143.39	0.7499813	143.39	0.7817311	143.39	-0.1432741	143.4	-0.2049333	143.4	-0.16889	143.4	-0.1936301	143.4	-0.1568777	143.4	-0.1940347	143.4	-0.1592337	143.4	-0.1548487	143.4	-0.1456204
143.59	0.7443021	143.59	0.683112	143.59	0.7289803	143.59	0.7490081	143.59	0.6978974	143.59	0.7577227	143.59	0.7829938	143.59	-0.1465652	143.6	-0.2102009	143.6	-0.1680311	143.6	-0.1966787	143.6	-0.1583244	143.6	-0.1964145	143.6	-0.1578573	143.6	-0.1514087	143.6	-0.1447108
143.79	0.7478833	143.79	0.6900504	143.79	0.7276092	143.79	0.7470049	143.79	0.7016613	143.79	0.7559725	143.79	0.7903435	143.79	-0.1446109	143.8	-0.2079086	143.8	-0.1691338	143.8	-0.1970014	143.8	-0.1579929	143.8	-0.1919558	143.8	-0.1590601	143.8	-0.1563974	143.8	-0.1470016
143.99	0.744734	143.99	0.6879942	143.99	0.7348749	143.99	0.7462461	143.99	0.7055765	143.99	0.7586941	143.99	0.7927432	143.99	-0.1448295	144	-0.2048056	144	-0.1659663	144	-0.1946699	144	-0.1598046	144	-0.1958123	144	-0.162466	144	-0.1587683	144	-0.1485014
144.19	0.7500417	144.19	0.6956789	144.19	0.735223	144.19	0.7509038	144.19	0.7007003	144.19	0.7625079	144.19	0.795537	144.19	-0.1453474	144.2	-0.2063475	144.2	-0.165871	144.2	-0.1898857	144.2	-0.1556529	144.2	-0.1926137	144.2	-0.1594602	144.2	-0.1537413	144.2	-0.1452983
144.39	0.7481192	144.39	0.6949072	144.39	0.7368233	144.39	0.7544929	144.39	0.7031515	144.39	0.7616037	144.39	0.7938234	144.39	-0.1432367	144.4	-0.2059375	144.4	-0.1693918	144.4	-0.1936065	144.4	-0.1545994	144.4	-0.1943931	144.4	-0.1591618	144.4	-0.1496985	144.4	-0.149164
144.59	0.7544858	144.59	0.6937823	144.59	0.7388822	144.59	0.7574171	144.59	0.709971	144.59	0.7610996	144.59	0.7938439	144.59	-0.1457109	144.6	-0.209575	144.6	-0.1687739	144.6	-0.1929731	144.6	-0.1594108	144.6	-0.1902544	144.6	-0.1624514	144.6	-0.155949	144.6	-0.1449749
144.79	0.7559083	144.79	0.6999326	144.79	0.7426997	144.79	0.7575654	144.79	0.7119386	144.79	0.7646327	144.79	0.8018361	144.79	-0.1427319	144.8	-0.2039746	144.8	-0.168491	144.8	-0.1919899	144.8	-0.158651	144.8	-0.1964593	144.8	-0.1582239	144.8	-0.1473053	144.8	-0.1514172
144.99	0.7582888	144.99	0.7026777	144.99	0.7396852	144.99	0.7614453	144.99	0.7145625	144.99	0.7699529	144.99	0.7968912	144.99	-0.1429328	145	-0.2053805	145	-0.1669885	145	-0.1917034	145	-0.1544831	145	-0.1931109	145	-0.1556656	145	-0.1540721	145	-0.151032
145.19	0.7564135	145.19	0.7013232	145.19	0.7411216	145.19	0.7605858	145.19	0.7163864	145.19	0.7710671	145.19	0.8070468	145.19	-0.1461055	145.2	-0.2067676	145.2	-0.1650426	145.2	-0.1923265	145.2	-0.1573474	145.2	-0.1920518	145.2	-0.1578021	145.2	-0.1564534	145.2	-0.1529326
145.39	0.7620778	145.39	0.7026966	145.39	0.7452083	145.39	0.7601427	145.39	0.7135493	145.39	0.774135	145.39	0.8058347	145.39	-0.144013	145.4	-0.2030087	145.4	-0.1653467	145.4	-0.1932853	145.4	-0.1565392	145.4	-0.194185	145.4	-0.1580534	145.4	-0.1507766	145.4	-0.1442179
145.59	0.7653486	145.59	0.7029268	145.59	0.7441788	145.59	0.7602023	145.59	0.7157227	145.59	0.7752343	145.59	0.8114402	145.59	-0.1476574	145.6	-0.2017849	145.6	-0.1695277	145.6	-0.1967781	145.6	-0.1568004	145.6	-0.1917115	145.6	-0.1590942	145.6	-0.152725	145.6	-0.147479
145.79	0.7666482	145.79	0.7058202	145.79	0.7432531	145.79	0.7665824	145.79	0.7179398	145.79	0.7760239	145.79	0.810875	145.79	-0.1435264	145.8	-0.2059567	145.8	-0.1622763	145.8	-0.1878844	145.8	-0.1558647	145.8	-0.1929714	145.8	-0.1569706	145.8	-0.1502328	145.8	-0.1472849
145.99	0.7634712	145.99	0.7081787	145.99	0.7453737	145.99	0.7702454	145.99	0.7161105	145.99	0.7753339	145.99	0.8115046	145.99	-0.1440516	146	-0.2047415	146	-0.1690373	146	-0.1940908	146	-0.1511786	146	-0.1905773	146	-0.1534601	146	-0.1537256	146	-0.1471847
146.19	0.7659767	146.19	0.7129817	146.19	0.753924	146.19	0.7697796	146.19	0.7187549	146.19	0.7814921	146.19	0.809804	146.19	-0.1442148	146.2	-0.2038658	146.2	-0.1668112	146.2	-0.1928909	146.2	-0.1532439	146.2	-0.1899795	146.2	-0.1546769	146.2	-0.1533626	146.2	-0.1446776
146.39	0.7705222	146.39	0.7135605	146.39	0.7542135	146.39	0.7670646	146.39	0.7250112	146.39	0.779467	146.39	0.8103288	146.39	-0.1442153	146.4	-0.200708	146.4	-0.168798	146.4	-0.1938556	146.4	-0.1561002	146.4	-0.1954917	146.4	-0.1586956	146.4	-0.1512026	146.4	-0.1438334
146.59	0.7672621	146.59	0.7173386	146.59	0.7589312	146.59	0.7731152	146.59	0.7269151	146.59	0.7862712	146.59	0.8084906	146.59	-0.147265	146.6	-0.2015983	146.6	-0.1645388	146.6	-0.1950091	146.6	-0.1559526	146.6	-0.1904031	146.6	-0.1569075	146.6	-0.1523052	146.6	-0.1447781
146.79	0.7740236	146.79	0.7126125	146.79	0.7566811	146.79	0.7746388	146.79	0.7306874	146.79	0.7827666	146.79	0.8180129	146.79	-0.1390545	146.8	-0.2028208	146.8	-0.1680097	146.8	-0.1907641	146.8	-0.1535749	146.8	-0.1965438	146.8	-0.1564226	146.8	-0.1514724	146.8	-0.1486542
146.99	0.780398	146.99	0.7181486	146.99	0.7572299	146.99	0.7768617	146.99	0.7308827	146.99	0.7843795	146.99	0.8220609	146.99	-0.1442725	147	-0.2046346	147	-0.1657276	147	-0.1887381	147	-0.1552487	147	-0.1937384	147	-0.1577997	147	-0.151548	147	-0.1439402
147.19	0.772861	147.19	0.720695	147.19	0.7638736	147.19	0.7806063	147.19	0.7346156	147.19	0.7894138	147.19	0.8232998	147.19	-0.1414938	147.2	-0.204481	147.2	-0.1623351	147.2	-0.1912975	147.2	-0.1583754	147.2	-0.1864212	147.2	-0.1574336	147.2	-0.1520291	147.2	-0.1419894
147.39	0.7813227	147.39	0.7168719	147.39	0.7689083	147.39	0.7831398	147.39	0.7365347	147.39	0.7898701	147.39	0.8279688	147.39	-0.1447872	147.4	-0.1990883	147.4	-0.1665801	147.4	-0.1902662	147.4	-0.1547573	147.4	-0.1884846	147.4	-0.1561481	147.4	-0.1498471	147.4	-0.1436969
147.59	0.7828445	147.59	0.728218	147.59	0.7665239	147.59	0.7834207	147.59	0.7301005	147.59	0.7889988	147.59	0.8269342	147.59	-0.144849	147.6	-0.205829	147.6	-0.1607157	147.6	-0.1879929	147.6	-0.1530965	147.6	-0.1897268	147.6	-0.1557761	147.6	-0.1510441	147.6	-0.1417371
147.79	0.7788147	147.79	0.7244105	147.79	0.7649451	147.79	0.7801747	147.79	0.7355286	147.79	0.7936062	147.79	0.8249894	147.79	-0.1402092	147.8	-0.2054462	147.8	-0.1662016	147.8	-0.1920544	147.8	-0.1580505	147.8	-0.1891377	147.8	-0.1579777	147.8	-0.1505602	147.8	-0.145555
147.99	0.7826788	147.99	0.727591	147.99	0.7668034	147.99	0.7893155	147.99	0.734104	147.99	0.7969731	147.99	0.8301592	147.99	-0.1381069	148	-0.19584	148	-0.1612695	148	-0.1909105	148	-0.1531308	148	-0.1941215	148	-0.1594329	148	-0.1501441	148	-0.1417793
148.19	0.7879109	148.19	0.7323304	148.19	0.7705439	148.19	0.7909563	148.19	0.7415067	148.19	0.7973726	148.19	0.8305928	148.19	-0.1405298	148.2	-0.1997792	148.2	-0.1614704	148.2	-0.1899311	148.2	-0.1554384	148.2	-0.1928052	148.2	-0.1542413	148.2	-0.1494671	148.2	-0.1432478
148.39	0.787986	148.39	0.7344824	148.39	0.7725658	148.39	0.7905849	148.39	0.7388186	148.39	0.8031574	148.39	0.8363217	148.39	-0.1424987	148.4	-0.2012751	148.4	-0.1648463	148.4	-0.18477	148.4	-0.1583779	148.4	-0.1916714	148.4	-0.1540371	148.4	-0.1498819	148.4	-0.1409976
148.59	0.792689	148.59	0.7341111	148.59	0.7756167	148.59	0.7942118	148.59	0.7479187	148.59	0.8041109	148.59	0.8356963	148.59	-0.1453011	148.6	-0.2033061	148.6	-0.1648202	148.6	-0.1887394	148.6	-0.1538067	148.6	-0.1976636	148.6	-0.1542704	148.6	-0.1490673	148.6	-0.1448364
148.79	0.794579	148.79	0.7341116	148.79	0.7772653	148.79	0.798075	148.79	0.7458374	148.79	0.8044438	148.79	0.8398573	148.79	-0.1405156	148.8	-0.2003756	148.8	-0.1616507	148.8	-0.193774	148.8	-0.1535901	148.8	-0.1953213	148.8	-0.1493425	148.8	-0.149009	148.8	-0.1501026
148.99	0.7995538	148.99	0.737385	148.99	0.7757626	148.99	0.797024	148.99	0.7491083	148.99	0.8043422	148.99	0.8369974	148.99	-0.1391126	149	-0.1995766	149	-0.1647139	149	-0.1868119	149	-0.1487226	149	-0.1941407	149	-0.1514684	149	-0.1495593	149	-0.1431669
149.19	0.798272	149.19	0.7438149	149.19	0.7849025	149.19	0.7994763	149.19	0.7500214	149.19	0.8094512	149.19	0.8396788	149.19	-0.1388361	149.2	-0.2008845	149.2	-0.1644518	149.2	-0.1898706	149.2	-0.153851	149.2	-0.1885592	149.2	-0.1515027	149.2	-0.1502396	149.2	-0.1442212
149.39	0.7980688	149.39	0.738706	149.39	0.7829491	149.39	0.805443	149.39	0.7450734	149.39	0.8108447	149.39	0.8443909	149.39	-0.138433	149.4	-0.2023835	149.4	-0.165065	149.4	-0.1929065	149.4	-0.1488765	149.4	-0.1895206	149.4	-0.1555176	149.4	-0.1509359	149.4	-0.1430699
149.59	0.8019974	149.59	0.7437215	149.59	0.7864074	149.59	0.8010365	149.59	0.7575377	149.59	0.8117244	149.59	0.8439637	149.59	-0.137429	149.6	-0.1989868	149.6	-0.1610266	149.6	-0.1883622	149.6	-0.1525803	149.6	-0.1869868	149.6	-0.1532209	149.6	-0.151053	149.6	-0.1425032
149.79	0.8039414	149.79	0.7483676	149.79	0.7876477	149.79	0.8108665	149.79	0.7547969	149.79	0.8177593	149.79	0.8419099	149.79	-0.137196	149.8	-0.200752	149.8	-0.1615665	149.8	-0.1902294	149.8	-0.1519259	149.8	-0.1856709	149.8	-0.1541394	149.8	-0.1481722	149.8	-0.1425995
149.99	0.8023428	149.99	0.7474856	149.99	0.78303	149.99	0.8065451	149.99	0.759434	149.99	0.8112444	149.99	0.8499971	149.99	-0.1394331	150	-0.2053988	150	-0.1644166	150	-0.1871596	150	-0.1531088	150	-0.1875515	150	-0.1530098	150	-0.1523471	150	-0.1391377
150.19	0.8066776	150.19	0.747718	150.19	0.7913394	150.19	0.8094351	150.19	0.7611497	150.19	0.8174586	150.19	0.8530264	150.19	-0.1375812	150.2	-0.2009314	150.2	-0.1639038	150.2	-0.1890016	150.2	-0.1495818	150.2	-0.1862788	150.2	-0.1504152	150.2	-0.149418	150.2	-0.1443812
150.39	0.803391	150.39	0.7499055	150.39	0.7892396	150.39	0.809753	150.39	0.7571875	150.39	0.8166062	150.39	0.8492893	150.39	-0.1397534	150.4	-0.1998585	150.4	-0.163002	150.4	-0.1871898	150.4	-0.1506693	150.4	-0.1877068	150.4	-0.151314	150.4	-0.146588	150.4	-0.1444501
150.59	0.8064543	150.59	0.7510316	150.59	0.7961172	150.59	0.8140857	150.59	0.7634343	150.59	0.8173951	150.59	0.8553414	150.59	-0.1418534	150.6	-0.1963751	150.6	-0.1629724	150.6	-0.1873247	150.6	-0.1519552	150.6	-0.1907402	150.6	-0.1577201	150.6	-0.1452725	150.6	-0.1422034
150.79	0.8142359	150.79	0.7516881	150.79	0.792923	150.79	0.8125768	150.79	0.763225	150.79	0.8203149	150.79	0.8502042	150.79	-0.1395441	150.8	-0.1992351	150.8	-0.1645172	150.8	-0.1913143	150.8	-0.1498488	150.8	-0.1900031	150.8	-0.1516481	150.8	-0.1489763	150.8	-0.1438175
150.99	0.8134055	150.99	0.7517678	150.99	0.7996721	150.99	0.8115077	150.99	0.7678844	150.99	0.8263503	150.99	0.8578463	150.99	-0.1376272	151	-0.1983727	151	-0.1610455	151	-0.1840364	151	-0.1471449	151	-0.1865224	151	-0.1478035	151	-0.1456325	151	-0.139658
151.19	0.8152308	151.19	0.7546722	151.19	0.7964128	151.19	0.8132835	151.19	0.7634885	151.19	0.8236135	151.19	0.8582917	151.19	-0.1429108	151.2	-0.1975783	151.2	-0.1618363	151.2	-0.1858705	151.2	-0.1457046	151.2	-0.1869675	151.2	-0.1553906	151.2	-0.1446001	151.2	-0.1427114
151.39	0.8139616	151.39	0.7595056	151.39	0.8005654	151.39	0.8199743	151.39	0.7660637	151.39	0.8290687	151.39	0.8667271	151.39	-0.1365118	151.4	-0.1962023	151.4	-0.1596342	151.4	-0.1868204	151.4	-0.1527886	151.4	-0.1882621	151.4	-0.147924	151.4	-0.1424451	151.4	-0.1403078
151.59	0.8153319	151.59	0.7576871	151.59	0.8070628	151.59	0.8170622	151.59	0.7664504	151.59	0.8259473	151.59	0.8636234	151.59	-0.1359245	151.6	-0.1987712	151.6	-0.156741	151.6	-0.1898298	151.6	-0.14971	151.6	-0.1877899	151.6	-0.15237	151.6	-0.1424513	151.6	-0.1397549
151.79	0.8224704	151.79	0.7551266	151.79	0.8081142	151.79	0.8223093	151.79	0.7755621	151.79	0.8320555	151.79	0.8647353	151.79	-0.1348304	151.8	-0.2010238	151.8	-0.1604287	151.8	-0.182816	151.8	-0.1510899	151.8	-0.1834874	151.8	-0.1508861	151.8	-0.1461853	151.8	-0.1407293
151.99	0.8213434	151.99	0.7615626	151.99	0.8055979	151.99	0.8216116	151.99	0.7743226	151.99	0.834792	151.99	0.8700709	151.99	-0.1392755	152	-0.2033389	152	-0.1584377	152	-0.1880696	152	-0.1499865	152	-0.1851825	152	-0.1529696	152	-0.1452122	152	-0.1371539
152.19	0.8232076	152.19	0.7645794	152.19	0.8085438	152.19	0.8221087	152.19	0.7745987	152.19	0.8319021	152.19	0.8704174	152.19	-0.1404591	152.2	-0.201096	152.2	-0.1601023	152.2	-0.1830722	152.2	-0.1470759	152.2	-0.1911311	152.2	-0.14937	152.2	-0.145536	152.2	-0.1447967
152.39	0.8232666	152.39	0.7621409	152.39	0.8072838	152.39	0.8242753	152.39	0.7776679	152.39	0.8371892	152.39	0.8675417	152.39	-0.1401971	152.4	-0.1984001	152.4	-0.1593518	152.4	-0.1872345	152.4	-0.1493754	152.4	-0.185829	152.4	-0.1497113	152.4	-0.149622	152.4	-0.1426268
152.59	0.8223259	152.59	0.7665265	152.59	0.8110331	152.59	0.8272185	152.59	0.7775092	152.59	0.8389505	152.59	0.8739477	152.59	-0.1404181	152.6	-0.1948404	152.6	-0.1585056	152.6	-0.1870118	152.6	-0.1516746	152.6	-0.1843894	152.6	-0.151562	152.6	-0.1479217	152.6	-0.1421893
152.79	0.8296127	152.79	0.7715032	152.79	0.8160372	152.79	0.829527	152.79	0.7830878	152.79	0.8368651	152.79	0.8728936	152.79	-0.135962	152.8	-0.1994324	152.8	-0.1574108	152.8	-0.1900583	152.8	-0.1501804	152.8	-0.1851101	152.8	-0.1485967	152.8	-0.1433112	152.8	-0.1405214
152.99	0.8281138	152.99	0.7690864	152.99	0.8125545	152.99	0.8284567	152.99	0.7806867	152.99	0.8391705	152.99	0.8810236	152.99	-0.1362229	153	-0.1969685	153	-0.1588855	153	-0.1842688	153	-0.15093	153	-0.1842761	153	-0.1463611	153	-0.1486937	153	-0.145159
153.19	0.8240852	153.19	0.7735282	153.19	0.8135201	153.19	0.8384209	153.19	0.7779105	153.19	0.8417448	153.19	0.8734318	153.19	-0.1380424	153.2	-0.2011608	153.2	-0.152598	153.2	-0.1853858	153.2	-0.1494191	153.2	-0.1856949	153.2	-0.1511911	153.2	-0.1444877	153.2	-0.135277
153.39	0.83561	153.39	0.7739436	153.39	0.8166249	153.39	0.8357129	153.39	0.7892774	153.39	0.844959	153.39	0.8783347	153.39	-0.1376854	153.4	-0.197711	153.4	-0.1597684	153.4	-0.181333	153.4	-0.14802	153.4	-0.1861628	153.4	-0.1498457	153.4	-0.1445505	153.4	-0.1362738
153.59	0.8308304	153.59	0.7779549	153.59	0.8141621	153.59	0.8389009	153.59	0.7857356	153.59	0.8459256	153.59	0.8787649	153.59	-0.1451561	153.6	-0.1958987	153.6	-0.157543	153.6	-0.1837966	153.6	-0.1541983	153.6	-0.1849032	153.6	-0.1521743	153.6	-0.1451385	153.6	-0.1380968
153.79	0.8337526	153.79	0.7783157	153.79	0.819305	153.79	0.8376963	153.79	0.790077	153.79	0.8485906	153.79	0.880011	153.79	-0.1409924	153.8	-0.2000621	153.8	-0.1603019	153.8	-0.1875634	153.8	-0.1491858	153.8	-0.1849373	153.8	-0.1506467	153.8	-0.1461928	153.8	-0.1440052
153.99	0.8323504	153.99	0.7762523	153.99	0.8246722	153.99	0.8451144	153.99	0.7891052	153.99	0.8493249	153.99	0.883855	153.99	-0.137544	154	-0.1943154	154	-0.1583558	154	-0.1867144	154	-0.1484574	154	-0.186607	154	-0.1458154	154	-0.1468544	154	-0.1398393
154.19	0.8422924	154.19	0.7780322	154.19	0.8267196	154.19	0.8386391	154.19	0.7904524	154.19	0.8489783	154.19	0.8867859	154.19	-0.1355009	154.2	-0.1982362	154.2	-0.159525	154.2	-0.1841008	154.2	-0.1467478	154.2	-0.185741	154.2	-0.1421407	154.2	-0.1426002	154.2	-0.1377142
154.39	0.8423411	154.39	0.7818316	154.39	0.8230947	154.39	0.846714	154.39	0.7932485	154.39	0.8513995	154.39	0.8875554	154.39	-0.1353493	154.4	-0.1978162	154.4	-0.1637584	154.4	-0.1860743	154.4	-0.1448623	154.4	-0.1866729	154.4	-0.1540396	154.4	-0.1428879	154.4	-0.1411796
154.59	0.8370106	154.59	0.7823979	154.59	0.8287157	154.59	0.848575	154.59	0.7984242	154.59	0.8559977	154.59	0.8850687	154.59	-0.1370314	154.6	-0.1962678	154.6	-0.1599279	154.6	-0.184632	154.6	-0.1501594	154.6	-0.1861967	154.6	-0.1462672	154.6	-0.1430414	154.6	-0.1394805
154.79	0.843482	154.79	0.7823337	154.79	0.827719	154.79	0.8456468	154.79	0.7948236	154.79	0.8523615	154.79	0.8934883	154.79	-0.1378732	154.8	-0.19943	154.8	-0.1584113	154.8	-0.1850454	154.8	-0.1514439	154.8	-0.1824252	154.8	-0.1473512	154.8	-0.1424589	154.8	-0.1385071
154.99	0.8387098	154.99	0.7904025	154.99	0.8274263	154.99	0.8471093	154.99	0.7947291	154.99	0.8590734	154.99	0.8889601	154.99	-0.1399382	155	-0.192226	155	-0.1531425	155	-0.183467	155	-0.1504391	155	-0.1840046	155	-0.152554	155	-0.1492212	155	-0.1383448
155.19	0.8431212	155.19	0.7892642	155.19	0.8329217	155.19	0.8502602	155.19	0.7944945	155.19	0.8594135	155.19	0.8946551	155.19	-0.1359808	155.2	-0.2003446	155.2	-0.1549232	155.2	-0.1822003	155.2	-0.1467702	155.2	-0.1810316	155.2	-0.1499743	155.2	-0.1446524	155.2	-0.1402513
155.39	0.8500684	155.39	0.7912434	155.39	0.8308935	155.39	0.8523986	155.39	0.8046278	155.39	0.8603234	155.39	0.8980674	155.39	-0.1364534	155.4	-0.1946116	155.4	-0.1575249	155.4	-0.1829515	155.4	-0.1462133	155.4	-0.1849342	155.4	-0.1496097	155.4	-0.1440768	155.4	-0.1418758
155.59	0.8491693	155.59	0.7906738	155.59	0.8361095	155.59	0.8548555	155.59	0.8014246	155.59	0.8642496	155.59	0.8968732	155.59	-0.1403211	155.6	-0.193523	155.6	-0.1540412	155.6	-0.1812393	155.6	-0.1479304	155.6	-0.1847053	155.6	-0.1500721	155.6	-0.1417065	155.6	-0.1379593
155.79	0.8486103	155.79	0.7904941	155.79	0.839	155.79	0.8508011	155.79	0.8028428	155.79	0.8626031	155.79	0.8968313	155.79	-0.1361986	155.8	-0.1974979	155.8	-0.1525246	155.8	-0.1861354	155.8	-0.1502166	155.8	-0.1870832	155.8	-0.1474227	155.8	-0.1478873	155.8	-0.1404145
155.99	0.8522497	155.99	0.7902411	155.99	0.8366817	155.99	0.8550818	155.99	0.8101671	155.99	0.86838	155.99	0.8993875	155.99	-0.1342843	156	-0.1913899	156	-0.1561487	156	-0.1817862	156	-0.1445801	156	-0.177895	156	-0.1503648	156	-0.1466766	156	-0.138869
156.19	0.8570897	156.19	0.7933788	156.19	0.8397956	156.19	0.8541583	156.19	0.8027735	156.19	0.869398	156.19	0.9047921	156.19	-0.1292875	156.2	-0.1984607	156.2	-0.1551643	156.2	-0.1840658	156.2	-0.140172	156.2	-0.1849138	156.2	-0.1473742	156.2	-0.1434788	156.2	-0.1357618
156.39	0.8566197	156.39	0.7955235	156.39	0.8451796	156.39	0.8593016	156.39	0.8063831	156.39	0.8638042	156.39	0.9037911	156.39	-0.1392053	156.4	-0.1922433	156.4	-0.158055	156.4	-0.1890192	156.4	-0.1413063	156.4	-0.1840176	156.4	-0.144591	156.4	-0.1442332	156.4	-0.1369713
156.59	0.8571454	156.59	0.795728	156.59	0.8416765	156.59	0.862498	156.59	0.811254	156.59	0.8684307	156.59	0.9052128	156.59	-0.132914	156.6	-0.1964345	156.6	-0.1626788	156.6	-0.1830931	156.6	-0.1445448	156.6	-0.1797232	156.6	-0.1449607	156.6	-0.14323	156.6	-0.1341548
156.79	0.8567238	156.79	0.8025887	156.79	0.8449748	156.79	0.862699	156.79	0.8106121	156.79	0.8688494	156.79	0.9082	156.79	-0.1320618	156.8	-0.1952242	156.8	-0.1478789	156.8	-0.1784245	156.8	-0.1417261	156.8	-0.1807075	156.8	-0.1462098	156.8	-0.1439954	156.8	-0.1369099
156.99	0.8649888	156.99	0.7995447	156.99	0.8453574	156.99	0.8642516	156.99	0.8146269	156.99	0.8747861	156.99	0.9104656	156.99	-0.1348672	157	-0.1944664	157	-0.1538707	157	-0.1848024	157	-0.1421704	157	-0.1807589	157	-0.1508805	157	-0.1432362	157	-0.1353464
157.19	0.8651511	157.19	0.7976244	157.19	0.8445105	157.19	0.8666866	157.19	0.814876	157.19	0.8745759	157.19	0.9120539	157.19	-0.1330298	157.2	-0.192549	157.2	-0.1533488	157.2	-0.1783497	157.2	-0.1482254	157.2	-0.1814493	157.2	-0.1423524	157.2	-0.1408394	157.2	-0.1359776
157.39	0.8594314	157.39	0.8076251	157.39	0.8470364	157.39	0.8667697	157.39	0.8166519	157.39	0.8785111	157.39	0.9107218	157.39	-0.1333598	157.4	-0.1902802	157.4	-0.1531716	157.4	-0.1818357	157.4	-0.147321	157.4	-0.1798279	157.4	-0.1425653	157.4	-0.1445497	157.4	-0.1418968
157.59	0.8664685	157.59	0.802722	157.59	0.8466817	157.59	0.872759	157.59	0.8202966	157.59	0.8799114	157.59	0.9168091	157.59	-0.1367539	157.6	-0.1919662	157.6	-0.1532506	157.6	-0.181236	157.6	-0.1459807	157.6	-0.1817556	157.6	-0.1498883	157.6	-0.1436168	157.6	-0.137441
157.79	0.8698018	157.79	0.8096316	157.79	0.8551875	157.79	0.8680683	157.79	0.818532	157.79	0.8770837	157.79	0.9154428	157.79	-0.1331405	157.8	-0.1903437	157.8	-0.1570433	157.8	-0.1799132	157.8	-0.1467913	157.8	-0.176705	157.8	-0.1480089	157.8	-0.138382	157.8	-0.1345015
157.99	0.8691723	157.99	0.8083565	157.99	0.8510002	157.99	0.8721398	157.99	0.8213139	157.99	0.8825887	157.99	0.9208196	157.99	-0.1314352	158	-0.1928985	158	-0.1513211	158	-0.1807105	158	-0.1434755	158	-0.1829072	158	-0.1469771	158	-0.1380138	158	-0.1353827
158.19	0.870689	158.19	0.8126579	158.19	0.8581527	158.19	0.8731546	158.19	0.823108	158.19	0.8824838	158.19	0.9204137	158.19	-0.1292181	158.2	-0.1944427	158.2	-0.1558226	158.2	-0.1802032	158.2	-0.1448973	158.2	-0.1828719	158.2	-0.1424284	158.2	-0.1427961	158.2	-0.1345457
158.39	0.873547	158.39	0.8137583	158.39	0.8572181	158.39	0.8734214	158.39	0.8262467	158.39	0.883015	158.39	0.9165993	158.39	-0.1332243	158.4	-0.1894486	158.4	-0.1515737	158.4	-0.182777	158.4	-0.1442938	158.4	-0.1843223	158.4	-0.1486019	158.4	-0.1416503	158.4	-0.1327651
158.59	0.8686202	158.59	0.8119389	158.59	0.8586668	158.59	0.8739498	158.59	0.8223004	158.59	0.8861848	158.59	0.9214211	158.59	-0.1350362	158.6	-0.1928723	158.6	-0.1517948	158.6	-0.179093	158.6	-0.1414246	158.6	-0.1848937	158.6	-0.1418206	158.6	-0.1386607	158.6	-0.1378556
158.79	0.871913	158.79	0.8121709	158.79	0.8599443	158.79	0.876385	158.79	0.8230283	158.79	0.8875756	158.79	0.9274151	158.79	-0.137175	158.8	-0.1912887	158.8	-0.1533791	158.8	-0.180117	158.8	-0.1393617	158.8	-0.1847299	158.8	-0.1454327	158.8	-0.1399714	158.8	-0.1368638
158.99	0.8756419	158.99	0.8164655	158.99	0.8588889	158.99	0.8827462	158.99	0.8260799	158.99	0.8904109	158.99	0.9204937	158.99	-0.1313452	159	-0.1923528	159	-0.1521067	159	-0.181195	159	-0.1420913	159	-0.1843588	159	-0.1460418	159	-0.1393461	159	-0.1336304
159.19	0.8803422	159.19	0.8185208	159.19	0.8657584	159.19	0.8823976	159.19	0.8308504	159.19	0.8904999	159.19	0.9255168	159.19	-0.1334622	159.2	-0.1907604	159.2	-0.1538868	159.2	-0.18093	159.2	-0.1451431	159.2	-0.1778953	159.2	-0.1435514	159.2	-0.1393211	159.2	-0.1343678
159.39	0.8784572	159.39	0.8174864	159.39	0.863238	159.39	0.8816578	159.39	0.8358562	159.39	0.8909494	159.39	0.9240931	159.39	-0.1315801	159.4	-0.1904455	159.4	-0.1552373	159.4	-0.176805	159.4	-0.1452076	159.4	-0.1807892	159.4	-0.1435756	159.4	-0.1427049	159.4	-0.1358476
159.59	0.8807098	159.59	0.819968	159.59	0.8692049	159.59	0.8808241	159.59	0.8315297	159.59	0.8959475	159.59	0.9253938	159.59	-0.1337134	159.6	-0.1892799	159.6	-0.155007	159.6	-0.1802467	159.6	-0.1435394	159.6	-0.1810939	159.6	-0.1447029	159.6	-0.1386646	159.6	-0.130927
159.79	0.8813423	159.79	0.8203367	159.79	0.8689078	159.79	0.8862751	159.79	0.8388181	159.79	0.8963557	159.79	0.9250703	159.79	-0.1279114	159.8	-0.1928219	159.8	-0.1562775	159.8	-0.1801361	159.8	-0.1400743	159.8	-0.1769937	159.8	-0.1457994	159.8	-0.1463718	159.8	-0.1352362
159.99	0.8825354	159.99	0.825051	159.99	0.8701028	159.99	0.8862628	159.99	0.8403119	159.99	0.893542	159.99	0.9315822	159.99	-0.1330104	160	-0.1879675	160	-0.1512261	160	-0.1780078	160	-0.142101	160	-0.1752337	160	-0.1466824	160	-0.1344085	160	-0.1301654
160.19	0.8821207	160.19	0.8263978	160.19	0.871234	160.19	0.8923997	160.19	0.8366024	160.19	0.897438	160.19	0.9316512	160.19	-0.1313844	160.2	-0.1954653	160.2	-0.1530217	160.2	-0.1812076	160.2	-0.1424906	160.2	-0.17885	160.2	-0.1478361	160.2	-0.1399452	160.2	-0.1332324
160.39	0.8860973	160.39	0.8226269	160.39	0.8708745	160.39	0.8854889	160.39	0.8386356	160.39	0.896806	160.39	0.9328304	160.39	-0.130879	160.4	-0.1889665	160.4	-0.1482401	160.4	-0.1789074	160.4	-0.1389312	160.4	-0.1800961	160.4	-0.145257	160.4	-0.1422386	160.4	-0.1346955
160.59	0.8829744	160.59	0.8292906	160.59	0.8731307	160.59	0.8928932	160.59	0.8361102	160.59	0.8982911	160.59	0.9340461	160.59	-0.1337882	160.6	-0.1894818	160.6	-0.152317	160.6	-0.1819821	160.6	-0.1377346	160.6	-0.1807188	160.6	-0.1439085	160.6	-0.1379259	160.6	-0.1332687
160.79	0.8872647	160.79	0.826691	160.79	0.8734708	160.79	0.8982611	160.79	0.8412715	160.79	0.9005366	160.79	0.9390264	160.79	-0.1275203	160.8	-0.1933454	160.8	-0.1489712	160.8	-0.1792073	160.8	-0.1407474	160.8	-0.1742052	160.8	-0.1481925	160.8	-0.1382122	160.8	-0.1319088
160.99	0.8875023	160.99	0.8300775	160.99	0.8718197	160.99	0.8928059	160.99	0.8420958	160.99	0.9065772	160.99	0.9344399	160.99	-0.1341512	161	-0.1888773	161	-0.1535246	161	-0.1802368	161	-0.1382007	161	-0.1784185	161	-0.1417879	161	-0.1364011	161	-0.1334736
161.19	0.8918607	161.19	0.8317812	161.19	0.8777956	161.19	0.8964769	161.19	0.842988	161.19	0.9023284	161.19	0.9358555	161.19	-0.1295141	161.2	-0.1902869	161.2	-0.1551127	161.2	-0.176689	161.2	-0.1396392	161.2	-0.1766821	161.2	-0.1433141	161.2	-0.1354294	161.2	-0.137704
161.39	0.8952823	161.39	0.8304397	161.39	0.8776409	161.39	0.8954346	161.39	0.8514639	161.39	0.9096111	161.39	0.9458616	161.39	-0.135667	161.4	-0.1922092	161.4	-0.1506256	161.4	-0.1771644	161.4	-0.1429483	161.4	-0.1767975	161.4	-0.1445541	161.4	-0.1406407	161.4	-0.1282718
161.59	0.8947132	161.59	0.8404493	161.59	0.8795011	161.59	0.9014522	161.59	0.8485206	161.59	0.9072775	161.59	0.941385	161.59	-0.1300496	161.6	-0.1879858	161.6	-0.1510761	161.6	-0.1753489	161.6	-0.1373932	161.6	-0.1762499	161.6	-0.143306	161.6	-0.1424909	161.6	-0.1324147
161.79	0.8968326	161.79	0.8362622	161.79	0.8862274	161.79	0.9027981	161.79	0.850376	161.79	0.9080845	161.79	0.9448457	161.79	-0.1300492	161.8	-0.1878997	161.8	-0.1517362	161.8	-0.1781628	161.8	-0.1364249	161.8	-0.1773819	161.8	-0.1413871	161.8	-0.1385399	161.8	-0.1315321
161.99	0.9030157	161.99	0.8397595	161.99	0.8840078	161.99	0.8987847	161.99	0.8468156	161.99	0.9101199	161.99	0.9479547	161.99	-0.1344097	162	-0.1867138	162	-0.1544308	162	-0.1743984	162	-0.1400021	162	-0.1777073	162	-0.1457179	162	-0.1352329	162	-0.1323344
162.19	0.9015713	162.19	0.8422052	162.19	0.8824521	162.19	0.9006812	162.19	0.8517427	162.19	0.9151744	162.19	0.9490573	162.19	-0.1273997	162.2	-0.187832	162.2	-0.1481844	162.2	-0.1788681	162.2	-0.1415729	162.2	-0.1804664	162.2	-0.1462459	162.2	-0.1411727	162.2	-0.1354324
162.39	0.8980287	162.39	0.8369377	162.39	0.8823045	162.39	0.9043821	162.39	0.851768	162.39	0.9152705	162.39	0.9487585	162.39	-0.1325513	162.4	-0.1886675	162.4	-0.1480378	162.4	-0.1785526	162.4	-0.1428724	162.4	-0.1782673	162.4	-0.1463873	162.4	-0.1394526	162.4	-0.1347049
162.59	0.8994439	162.59	0.8441133	162.59	0.8850558	162.59	0.9033967	162.59	0.8540018	162.59	0.916895	162.59	0.9542918	162.59	-0.1267256	162.6	-0.1886583	162.6	-0.1454188	162.6	-0.1768392	162.6	-0.1366799	162.6	-0.1788688	162.6	-0.1413148	162.6	-0.1386337	162.6	-0.1317341
162.79	0.9023347	162.79	0.8446674	162.79	0.8856478	162.79	0.9043047	162.79	0.8572763	162.79	0.9151644	162.79	0.9475845	162.79	-0.1279804	162.8	-0.1897389	162.8	-0.1550418	162.8	-0.1783074	162.8	-0.1334493	162.8	-0.1774457	162.8	-0.1451748	162.8	-0.1356951	162.8	-0.1300576
162.99	0.9020785	162.99	0.8429596	162.99	0.8899854	162.99	0.9086855	162.99	0.8580664	162.99	0.9193975	162.99	0.9519241	162.99	-0.1308988	163	-0.1890878	163	-0.1538409	163	-0.1743693	163	-0.1401789	163	-0.177208	163	-0.140329	163	-0.1365164	163	-0.1337185
163.19	0.9026527	163.19	0.8424757	163.19	0.8931568	163.19	0.9079979	163.19	0.8604547	163.19	0.9157504	163.19	0.9522125	163.19	-0.1299129	163.2	-0.1893658	163.2	-0.1443239	163.2	-0.1737795	163.2	-0.1403434	163.2	-0.178187	163.2	-0.1420063	163.2	-0.1380693	163.2	-0.1347643
163.39	0.9042721	163.39	0.8467419	163.39	0.8955208	163.39	0.9098218	163.39	0.8569647	163.39	0.917076	163.39	0.9540887	163.39	-0.1312248	163.4	-0.1870315	163.4	-0.1528938	163.4	-0.1780637	163.4	-0.1391422	163.4	-0.1737766	163.4	-0.1423179	163.4	-0.1363639	163.4	-0.1306878
163.59	0.9097325	163.59	0.8455513	163.59	0.8931183	163.59	0.9137784	163.59	0.8593809	163.59	0.9216734	163.59	0.9542733	163.59	-0.1261129	163.6	-0.1878201	163.6	-0.1473769	163.6	-0.1784788	163.6	-0.1372706	163.6	-0.1749778	163.6	-0.1398366	163.6	-0.1411314	163.6	-0.1323742
163.79	0.9095606	163.79	0.8491178	163.79	0.89805	163.79	0.9138362	163.79	0.8611	163.79	0.9224662	163.79	0.9586645	163.79	-0.1334698	163.8	-0.1833958	163.8	-0.1472669	163.8	-0.1727675	163.8	-0.1388157	163.8	-0.1771695	163.8	-0.1404621	163.8	-0.1324561	163.8	-0.1295909
163.99	0.9148976	163.99	0.8513773	163.99	0.8981798	163.99	0.9137208	163.99	0.860429	163.99	0.92272	163.99	0.9645931	163.99	-0.1268139	164	-0.1880264	164	-0.1494992	164	-0.1745048	164	-0.1412278	164	-0.1752393	164	-0.1412437	164	-0.1363893	164	-0.1325233
164.19	0.9130116	164.19	0.8516585	164.19	0.896051	164.19	0.9146562	164.19	0.8640813	164.19	0.9236346	164.19	0.9637753	164.19	-0.1324549	164.2	-0.1869885	164.2	-0.1542363	164.2	-0.176811	164.2	-0.1402954	164.2	-0.1708202	164.2	-0.1397524	164.2	-0.1400023	164.2	-0.1318182
164.39	0.9136295	164.39	0.8542577	164.39	0.9009386	164.39	0.9154453	164.39	0.8639995	164.39	0.9270577	164.39	0.9629642	164.39	-0.1328467	164.4	-0.1853753	164.4	-0.1523369	164.4	-0.1730479	164.4	-0.1373677	164.4	-0.1744864	164.4	-0.1409411	164.4	-0.1300663	164.4	-0.1274509
164.59	0.9193931	164.59	0.8524883	164.59	0.9074094	164.59	0.9217618	164.59	0.8718585	164.59	0.9335493	164.59	0.9664683	164.59	-0.1310058	164.6	-0.1904552	164.6	-0.1462521	164.6	-0.1718732	164.6	-0.1402977	164.6	-0.1731185	164.6	-0.1411222	164.6	-0.129783	164.6	-0.1348126
164.79	0.915978	164.79	0.8538488	164.79	0.9036307	164.79	0.9173641	164.79	0.866348	164.79	0.9261529	164.79	0.9658686	164.79	-0.1295125	164.8	-0.1853261	164.8	-0.1466476	164.8	-0.1768385	164.8	-0.1321623	164.8	-0.173282	164.8	-0.1464633	164.8	-0.1337455	164.8	-0.1304061
164.99	0.9187357	164.99	0.8553357	164.99	0.9053721	164.99	0.92484	164.99	0.87515	164.99	0.9311514	164.99	0.964525	164.99	-0.1276221	165	-0.1790739	165	-0.1495517	165	-0.1781901	165	-0.1351282	165	-0.1751859	165	-0.1376201	165	-0.1319457	165	-0.1291897
165.19	0.9234964	165.19	0.8608714	165.19	0.9057301	165.19	0.9255375	165.19	0.8742864	165.19	0.9337212	165.19	0.9659815	165.19	-0.1274645	165.2	-0.1869959	165.2	-0.1485783	165.2	-0.1756825	165.2	-0.1318741	165.2	-0.1723484	165.2	-0.1421282	165.2	-0.1358016	165.2	-0.1292306
165.39	0.9203613	165.39	0.8616845	165.39	0.9057791	165.39	0.9252046	165.39	0.8703237	165.39	0.9313859	165.39	0.9704462	165.39	-0.1281682	165.4	-0.1858674	165.4	-0.1495032	165.4	-0.1721833	165.4	-0.1373102	165.4	-0.1748253	165.4	-0.141883	165.4	-0.1327579	165.4	-0.1271011
165.59	0.9228998	165.59	0.862772	165.59	0.912086	165.59	0.9289896	165.59	0.874203	165.59	0.9345568	165.59	0.9715447	165.59	-0.1260403	165.6	-0.1846261	165.6	-0.1503522	165.6	-0.1752968	165.6	-0.1390323	165.6	-0.1761756	165.6	-0.1427534	165.6	-0.1358903	165.6	-0.124799
165.79	0.9213904	165.79	0.8600172	165.79	0.9111472	165.79	0.9272667	165.79	0.8738701	165.79	0.9344075	165.79	0.9778008	165.79	-0.1281674	165.8	-0.1893062	165.8	-0.1493563	165.8	-0.1778209	165.8	-0.1378448	165.8	-0.1745286	165.8	-0.1422679	165.8	-0.1316222	165.8	-0.1285533
165.99	0.92742	165.99	0.8625489	165.99	0.9101329	165.99	0.9268391	165.99	0.8768623	165.99	0.9415462	165.99	0.9780928	165.99	-0.1250498	166	-0.1856005	166	-0.1441719	166	-0.1705838	166	-0.1373655	166	-0.1771293	166	-0.1394687	166	-0.1371563	166	-0.1289845
166.19	0.9279097	166.19	0.86804	166.19	0.9094486	166.19	0.9273856	166.19	0.8829973	166.19	0.9352926	166.19	0.9723936	166.19	-0.1263604	166.2	-0.1868605	166.2	-0.1481519	166.2	-0.1690078	166.2	-0.1331938	166.2	-0.1727369	166.2	-0.1387063	166.2	-0.132529	166.2	-0.1321502
166.39	0.9236201	166.39	0.8699135	166.39	0.9097091	166.39	0.9277382	166.39	0.8845353	166.39	0.9404384	166.39	0.977659	166.39	-0.1258734	166.4	-0.1873967	166.4	-0.1493874	166.4	-0.1730612	166.4	-0.1338712	166.4	-0.1763996	166.4	-0.1415886	166.4	-0.1333363	166.4	-0.1318599
166.59	0.925041	166.59	0.8672971	166.59	0.9129562	166.59	0.9368433	166.59	0.8824999	166.59	0.9447265	166.59	0.9781663	166.59	-0.1241593	166.6	-0.1859379	166.6	-0.143389	166.6	-0.1724775	166.6	-0.1370562	166.6	-0.1732098	166.6	-0.1356144	166.6	-0.1308405	166.6	-0.1282976
166.79	0.9264398	166.79	0.8682933	166.79	0.9207463	166.79	0.9343955	166.79	0.8866628	166.79	0.9365358	166.79	0.9827389	166.79	-0.1238584	166.8	-0.1845453	166.8	-0.1464202	166.8	-0.1747829	166.8	-0.136069	166.8	-0.1718519	166.8	-0.1383448	166.8	-0.1362209	166.8	-0.1276411
166.99	0.9268102	166.99	0.8694812	166.99	0.9201546	166.99	0.9310349	166.99	0.8813282	166.99	0.943143	166.99	0.9775076	166.99	-0.1256485	167	-0.1850372	167	-0.1485042	167	-0.1718199	167	-0.1388143	167	-0.1744903	167	-0.1370103	167	-0.1348736	167	-0.1268065
167.19	0.9327772	167.19	0.8686872	167.19	0.9172945	167.19	0.9332288	167.19	0.8848705	167.19	0.9433407	167.19	0.9790074	167.19	-0.1193217	167.2	-0.1781225	167.2	-0.1491139	167.2	-0.1737926	167.2	-0.136217	167.2	-0.1705779	167.2	-0.1383649	167.2	-0.133731	167.2	-0.1288818
167.39	0.9316025	167.39	0.8720328	167.39	0.9185495	167.39	0.9382236	167.39	0.8839594	167.39	0.9465842	167.39	0.9851869	167.39	-0.1293141	167.4	-0.1835265	167.4	-0.145701	167.4	-0.1699371	167.4	-0.1367879	167.4	-0.1732147	167.4	-0.1365067	167.4	-0.1339671	167.4	-0.1271347
167.59	0.9357926	167.59	0.8769928	167.59	0.9183903	167.59	0.9403796	167.59	0.8843236	167.59	0.9461905	167.59	0.9828771	167.59	-0.1244268	167.6	-0.1868176	167.6	-0.1428055	167.6	-0.170956	167.6	-0.1384483	167.6	-0.1738548	167.6	-0.1393284	167.6	-0.1333329	167.6	-0.1258474
167.79	0.9341623	167.79	0.8762469	167.79	0.9216061	167.79	0.9440592	167.79	0.8879488	167.79	0.9471875	167.79	0.9843036	167.79	-0.1225054	167.8	-0.1846846	167.8	-0.1447665	167.8	-0.1682629	167.8	-0.1353483	167.8	-0.17196	167.8	-0.1375963	167.8	-0.1306223	167.8	-0.124575
167.99	0.9352235	167.99	0.8723067	167.99	0.9226996	167.99	0.9373113	167.99	0.8912245	167.99	0.9500092	167.99	0.9875818	167.99	-0.1253039	168	-0.1809687	168	-0.1417448	168	-0.173697	168	-0.136337	168	-0.1742932	168	-0.1386441	168	-0.1355215	168	-0.1264892
168.19	0.9382721	168.19	0.8729491	168.19	0.9304355	168.19	0.9408662	168.19	0.8924253	168.19	0.952246	168.19	0.9872977	168.19	-0.1292908	168.2	-0.1810369	168.2	-0.1457975	168.2	-0.1713927	168.2	-0.1380542	168.2	-0.1715916	168.2	-0.1357424	168.2	-0.1326697	168.2	-0.1252486
168.39	0.9367127	168.39	0.8766927	168.39	0.9245251	168.39	0.9456419	168.39	0.8882816	168.39	0.9541025	168.39	0.988638	168.39	-0.1215137	168.4	-0.1825389	168.4	-0.1459128	168.4	-0.1748822	168.4	-0.1369966	168.4	-0.1745751	168.4	-0.1383534	168.4	-0.130763	168.4	-0.1285349
168.59	0.9370904	168.59	0.8821918	168.59	0.9235864	168.59	0.9465356	168.59	0.8930736	168.59	0.9532582	168.59	0.9929823	168.59	-0.1268772	168.6	-0.1807669	168.6	-0.1421237	168.6	-0.176559	168.6	-0.1356233	168.6	-0.1684335	168.6	-0.1391088	168.6	-0.1287365	168.6	-0.1265431
168.79	0.9400302	168.79	0.8828179	168.79	0.9266468	168.79	0.9464331	168.79	0.89419	168.79	0.9566071	168.79	0.9926252	168.79	-0.1199457	168.8	-0.1805878	168.8	-0.1405437	168.8	-0.1689019	168.8	-0.138832	168.8	-0.1769839	168.8	-0.1363065	168.8	-0.1329667	168.8	-0.1250604
168.99	0.9430287	168.99	0.8815213	168.99	0.9290061	168.99	0.9476941	168.99	0.8984578	168.99	0.9547797	168.99	0.9908177	168.99	-0.1228353	169	-0.1787795	169	-0.1452382	169	-0.1706414	169	-0.13605	169	-0.1713424	169	-0.1362521	169	-0.1354513	169	-0.1294043
169.19	0.9480955	169.19	0.8823251	169.19	0.9320413	169.19	0.948371	169.19	0.8949832	169.19	0.9591405	169.19	0.9962065	169.19	-0.125169	169.2	-0.1814286	169.2	-0.1452402	169.2	-0.1690133	169.2	-0.1323603	169.2	-0.1713809	169.2	-0.1361649	169.2	-0.1348208	169.2	-0.1253049
169.39	0.9490004	169.39	0.8854457	169.39	0.9294746	169.39	0.9547853	169.39	0.9008284	169.39	0.9571223	169.39	1.000369	169.39	-0.126511	169.4	-0.1814034	169.4	-0.1432635	169.4	-0.1746846	169.4	-0.1325828	169.4	-0.166975	169.4	-0.1389018	169.4	-0.1283861	169.4	-0.1279968
169.59	0.9498215	169.59	0.8877013	169.59	0.9342651	169.59	0.9515859	169.59	0.9012982	169.59	0.9579836	169.59	1.001262	169.59	-0.1278292	169.6	-0.1815061	169.6	-0.1451878	169.6	-0.1722656	169.6	-0.1309962	169.6	-0.1692788	169.6	-0.1421226	169.6	-0.1267904	169.6	-0.1257611
169.79	0.9462888	169.79	0.8873888	169.79	0.9339438	169.79	0.9507244	169.79	0.9008595	169.79	0.9581217	169.79	0.997198	169.79	-0.1245593	169.8	-0.1840091	169.8	-0.1411112	169.8	-0.1716402	169.8	-0.1355697	169.8	-0.1698454	169.8	-0.1363296	169.8	-0.1332347	169.8	-0.1272692
169.99	0.9795821	169.99	0.9168595	169.99	0.9678952	169.99	0.9880413	169.99	0.9386584	169.99	0.9953717	169.99	1.034985	169.99	-0.1206871	170	-0.1805581	170	-0.1471157	170	-0.1712236	170	-0.1303978	170	-0.1671824	170	-0.13523	170	-0.1297446	170	-0.1261252
170.19	0.979746	170.19	0.9195577	170.19	0.9739395	170.19	0.9926289	170.19	0.9394657	170.19	0.9985748	170.19	1.043066	170.19	-0.1235585	170.2	-0.1792332	170.2	-0.1428382	170.2	-0.1707803	170.2	-0.1357489	170.2	-0.1683328	170.2	-0.1349367	170.2	-0.1298814	170.2	-0.1229769
170.39	0.9855239	170.39	0.9234148	170.39	0.9699265	170.39	0.9945037	170.39	0.9425559	170.39	1.000568	170.39	1.040025	170.39	-0.1257989	170.39	-0.1806547	170.39	-0.1401696	170.39	-0.1690213	170.39	-0.1331877	170.39	-0.1690197	170.39	-0.1355997	170.39	-0.1286609	170.39	-0.1264318
170.59	0.9874856	170.59	0.9268842	170.59	0.9733975	170.59	0.9929805	170.59	0.9410669	170.59	1.006901	170.59	1.04221	170.59	-0.1222478	170.59	-0.1883171	170.59	-0.1411664	170.59	-0.167863	170.59	-0.135728	170.59	-0.1685528	170.59	-0.1324883	170.59	-0.1292036	170.59	-0.1226593
170.79	0.9873586	170.79	0.9255974	170.79	0.9773543	170.79	0.991786	170.79	0.943761	170.79	1.003993	170.79	1.045587	170.79	-0.123874	170.79	-0.1814739	170.79	-0.1414149	170.79	-0.1683208	170.79	-0.1340988	170.79	-0.1687429	170.79	-0.1373173	170.79	-0.1297896	170.79	-0.1229768
170.99	0.987765	170.99	0.9271675	170.99	0.9779605	170.99	1.002525	170.99	0.9430256	170.99	1.004349	170.99	1.048333	170.99	-0.1245271	171	-0.1783207	171	-0.1481985	171	-0.1692905	171	-0.1283769	171	-0.1723007	171	-0.1331402	171	-0.1267033	171	-0.1281715
171.19	0.9842619	171.19	0.9246239	171.19	0.9771081	171.19	0.99604	171.19	0.9444811	171.19	1.002428	171.19	1.048683	171.19	-0.1258238	171.19	-0.1820087	171.19	-0.1434193	171.19	-0.1662396	171.19	-0.1322754	171.19	-0.1714313	171.19	-0.1338836	171.19	-0.1332409	171.19	-0.1294089
171.39	0.9907023	171.39	0.9290152	171.39	0.9797773	171.39	0.9976838	171.39	0.9444323	171.39	1.002537	171.39	1.047526	171.39	-0.1211815	171.39	-0.1803082	171.39	-0.1450882	171.39	-0.1684586	171.39	-0.1329612	171.39	-0.1640192	171.39	-0.1337457	171.39	-0.1311984	171.39	-0.1214793
171.59	0.9863567	171.59	0.9296646	171.59	0.9778184	171.59	1.004766	171.59	0.9448481	171.59	1.004272	171.59	1.050462	171.59	-0.1236377	171.6	-0.180119	171.6	-0.140809	171.6	-0.1717807	171.6	-0.1300751	171.6	-0.1703989	171.6	-0.1391492	171.6	-0.132478	171.6	-0.1246239
171.79	0.9880068	171.79	0.9284481	171.79	0.979831	171.79	1.000721	171.79	0.9500656	171.79	1.010698	171.79	1.048938	171.79	-0.1216694	171.79	-0.1807949	171.79	-0.1446957	171.79	-0.1689615	171.79	-0.1318619	171.79	-0.1674241	171.79	-0.1324586	171.79	-0.1332666	171.79	-0.126167
171.99	0.9904804	171.99	0.93139	171.99	0.9781362	171.99	0.9971617	171.99	0.9455833	171.99	1.009786	171.99	1.047716	171.99	-0.1239929	171.99	-0.1821093	171.99	-0.1370592	171.99	-0.1683706	171.99	-0.1292045	171.99	-0.1696745	171.99	-0.1377458	171.99	-0.1254889	171.99	-0.1271091
172.19	0.987689	172.19	0.9294093	172.19	0.9808874	172.19	0.9996094	172.19	0.9453908	172.19	1.006599	172.19	1.052886	172.19	-0.1211162	172.19	-0.1865241	172.19	-0.142131	172.19	-0.1641368	172.19	-0.1316202	172.19	-0.1702709	172.19	-0.1350411	172.19	-0.1306928	172.19	-0.1252537
172.39	0.994238	172.39	0.9298438	172.39	0.9809113	172.39	0.9997727	172.39	0.9480753	172.39	1.007885	172.39	1.047086	172.39	-0.1231402	172.39	-0.1821855	172.39	-0.1404108	172.39	-0.1661093	172.39	-0.1315367	172.39	-0.1651093	172.39	-0.1337482	172.39	-0.1291369	172.39	-0.1245041
172.59	0.9896666	172.59	0.9303089	172.59	0.980498	172.59	1.004623	172.59	0.9477997	172.59	1.010171	172.59	1.047768	172.59	-0.1227313	172.59	-0.1828514	172.59	-0.1424285	172.59	-0.1655325	172.59	-0.1364575	172.59	-0.1658098	172.59	-0.1342239	172.59	-0.1257231	172.59	-0.1228373
172.79	0.9925298	172.79	0.9292105	172.79	0.9802511	172.79	0.9999344	172.79	0.9432493	172.79	1.016364	172.79	1.050679	172.79	-0.1210771	172.79	-0.1802457	172.79	-0.1420228	172.79	-0.1646072	172.79	-0.1305093	172.79	-0.1681748	172.79	-0.1292034	172.79	-0.1262277	172.79	-0.1219068
172.99	0.9894174	172.99	0.9296482	172.99	0.9818076	172.99	1.003874	172.99	0.9515985	172.99	1.007828	172.99	1.04897	172.99	-0.1172452	172.99	-0.1811151	172.99	-0.1417712	172.99	-0.1672715	172.99	-0.1328625	172.99	-0.1675398	172.99	-0.1311592	172.99	-0.1266803	172.99	-0.1271645
173.19	0.9961866	173.19	0.9329399	173.19	0.9819244	173.19	1.000217	173.19	0.9469333	173.19	1.010906	173.19	1.049235	173.19	-0.1219325	173.19	-0.1836413	173.19	-0.1402425	173.19	-0.170218	173.19	-0.1321785	173.19	-0.1679824	173.19	-0.1316848	173.19	-0.1278221	173.19	-0.1254911
173.39	0.9896775	173.39	0.9344371	173.39	0.9788697	173.39	0.9984859	173.39	0.9451668	173.39	1.008119	173.39	1.047802	173.39	-0.1193767	173.39	-0.1795576	173.39	-0.138625	173.39	-0.1696898	173.39	-0.1293192	173.39	-0.1638202	173.39	-0.1295397	173.39	-0.1240079	173.39	-0.1201802
173.59	0.9926858	173.59	0.9295254	173.59	0.9856448	173.59	1.002638	173.59	0.9491416	173.59	1.012645	173.59	1.052312	173.59	-0.1236088	173.59	-0.1777872	173.59	-0.1382913	173.59	-0.1680049	173.59	-0.1259092	173.59	-0.1687341	173.59	-0.1305602	173.59	-0.1240866	173.59	-0.120842
173.79	0.989314	173.79	0.9322227	173.79	0.9804463	173.79	1.005416	173.79	0.9455943	173.79	1.012104	173.79	1.0525	173.79	-0.1216595	173.8	-0.1747226	173.8	-0.1366569	173.8	-0.1665906	173.8	-0.1266765	173.8	-0.1674455	173.8	-0.1294158	173.8	-0.1317105	173.8	-0.1211717
173.99	0.9915156	173.99	0.9304674	173.99	0.9754925	173.99	1.003194	173.99	0.9473677	173.99	1.010669	173.99	1.050636	173.99	-0.1133917	173.99	-0.1744117	173.99	-0.1367913	173.99	-0.1661125	173.99	-0.1298663	173.99	-0.1653529	173.99	-0.1273928	173.99	-0.1264298	173.99	-0.1228295
174.19	0.9901093	174.19	0.9368703	174.19	0.9787298	174.19	1.003262	174.19	0.9512268	174.19	1.010977	174.19	1.051206	174.19	-0.1167905	174.19	-0.1759743	174.19	-0.1380232	174.19	-0.1650222	174.19	-0.1261781	174.19	-0.1626913	174.19	-0.1305616	174.19	-0.1249208	174.19	-0.1215611
174.39	0.9909744	174.39	0.9296826	174.39	0.9814925	174.39	1.004641	174.39	0.9469035	174.39	1.01366	174.39	1.051872	174.39	-0.1201642	174.39	-0.1813059	174.39	-0.1380223	174.39	-0.1643891	174.39	-0.1286623	174.39	-0.1676155	174.39	-0.1309766	174.39	-0.1237928	174.39	-0.1217556
174.6	0.9940371	174.6	0.9315902	174.6	0.9833799	174.6	1.005985	174.6	0.9475766	174.6	1.016455	174.6	1.051199	174.6	-0.116399	174.59	-0.1784089	174.59	-0.1403238	174.59	-0.1639825	174.59	-0.1289536	174.59	-0.1660132	174.59	-0.1294679	174.59	-0.1230917	174.59	-0.1228254
174.79	0.9993057	174.79	0.9356133	174.79	0.9850997	174.79	1.004438	174.79	0.9523556	174.79	1.011194	174.79	1.055167	174.79	-0.1160082	174.79	-0.1800583	174.79	-0.1421458	174.79	-0.1668053	174.79	-0.1300572	174.79	-0.1648619	174.79	-0.1309574	174.79	-0.1282081	174.79	-0.1255252
174.99	0.9955069	174.99	0.9311293	174.99	0.9853169	174.99	1.001074	174.99	0.9484347	174.99	1.012047	174.99	1.051198	174.99	-0.1187556	175	-0.1800458	175	-0.1402691	175	-0.1606327	175	-0.1274078	175	-0.1662288	175	-0.1315095	175	-0.1275822	175	-0.1230076
175.19	0.9943398	175.19	0.9291399	175.19	0.9812232	175.19	1.006401	175.19	0.9522572	175.19	1.009929	175.19	1.050883	175.19	-0.1197207	175.19	-0.1746263	175.19	-0.1414259	175.19	-0.1660464	175.19	-0.1323151	175.19	-0.1685573	175.19	-0.1298827	175.19	-0.1241225	175.19	-0.122238
175.39	0.9972063	175.39	0.9363798	175.39	0.9830925	175.39	1.001681	175.39	0.948355	175.39	1.011058	175.39	1.053056	175.39	-0.1193615	175.41	-0.1812906	175.41	-0.138763	175.41	-0.1657598	175.41	-0.1269723	175.41	-0.1683611	175.41	-0.1350033	175.41	-0.1288312	175.41	-0.1178836
175.59	0.9930035	175.59	0.9286197	175.59	0.9832882	175.59	1.004379	175.59	0.950172	175.59	1.011224	175.59	1.057414	175.59	-0.1216181	175.59	-0.1753797	175.59	-0.1357498	175.59	-0.1624487	175.59	-0.1346244	175.59	-0.1636361	175.59	-0.1315602	175.59	-0.1253904	175.59	-0.1183458
175.79	0.9950382	175.79	0.936723	175.79	0.9847779	175.79	1.005009	175.79	0.9490442	175.79	1.009638	175.79	1.052479	175.79	-0.1162803	175.8	-0.177221	175.8	-0.1435504	175.8	-0.166752	175.8	-0.1277285	175.8	-0.1644043	175.8	-0.1329225	175.8	-0.1237014	175.8	-0.1175899
175.99	0.9910553	175.99	0.9322754	175.99	0.9880581	175.99	1.007306	175.99	0.9500138	175.99	1.013466	175.99	1.053151	175.99	-0.1164782	176	-0.1759252	176	-0.1413123	176	-0.1677265	176	-0.128161	176	-0.1655677	176	-0.1290173	176	-0.125277	176	-0.1216612
176.19	0.9971041	176.19	0.932334	176.19	0.9840901	176.19	1.00878	176.19	0.9532068	176.19	1.012244	176.19	1.056571	176.19	-0.1156825	176.19	-0.1729393	176.19	-0.1398547	176.19	-0.1642428	176.19	-0.1277668	176.19	-0.1612302	176.19	-0.1292187	176.19	-0.1261339	176.19	-0.1202101
176.39	0.9949437	176.39	0.9346835	176.39	0.9887089	176.39	1.011743	176.39	0.9534266	176.39	1.013504	176.39	1.057736	176.39	-0.12113	176.4	-0.1753974	176.4	-0.1411175	176.4	-0.1612366	176.4	-0.1254983	176.4	-0.1657318	176.4	-0.1254694	176.4	-0.1250809	176.4	-0.122115
176.59	0.9928089	176.59	0.9344209	176.59	0.9850348	176.59	1.00442	176.59	0.9568442	176.59	1.015237	176.59	1.053186	176.59	-0.1148152	176.6	-0.1789342	176.6	-0.1331097	176.6	-0.1607958	176.6	-0.1257956	176.6	-0.1627146	176.6	-0.1313996	176.6	-0.1242411	176.6	-0.1189654
176.79	0.9981236	176.79	0.9364413	176.79	0.983106	176.79	1.0045	176.79	0.9503289	176.79	1.012955	176.79	1.054923	176.79	-0.113266	176.8	-0.1746841	176.8	-0.1432161	176.8	-0.1695565	176.8	-0.1286316	176.8	-0.1640973	176.8	-0.1283376	176.8	-0.1274126	176.8	-0.1180414
176.99	0.9925379	176.99	0.9371868	176.99	0.9865253	176.99	1.00606	176.99	0.9524901	176.99	1.015001	176.99	1.059777	176.99	-0.1208842	177	-0.1700206	177	-0.1383181	177	-0.1624248	177	-0.1257127	177	-0.1652857	177	-0.1277968	177	-0.1245584	177	-0.1192145
177.19	0.997305	177.19	0.9417424	177.19	0.985243	177.19	1.009417	177.19	0.9514638	177.19	1.015188	177.19	1.052641	177.19	-0.1159092	177.2	-0.169328	177.2	-0.1369185	177.2	-0.1633361	177.2	-0.1344187	177.2	-0.1625159	177.2	-0.1272877	177.2	-0.1256247	177.2	-0.1192254
177.39	0.9976572	177.39	0.9387195	177.39	0.9873329	177.39	1.01009	177.39	0.9532734	177.39	1.012991	177.39	1.058099	177.39	-0.1162149	177.43	-0.1744227	177.43	-0.134883	177.43	-0.161883	177.43	-0.1255093	177.43	-0.1618855	177.43	-0.1332372	177.43	-0.1283761	177.43	-0.1182553
177.59	1.000207	177.59	0.9372071	177.59	0.9843343	177.59	1.005917	177.59	0.9545051	177.59	1.015174	177.59	1.05759	177.59	-0.1130353	177.6	-0.1735611	177.6	-0.1396685	177.6	-0.1620867	177.6	-0.1281514	177.6	-0.1629596	177.6	-0.1300176	177.6	-0.1240302	177.6	-0.1201022
177.79	0.9939888	177.79	0.9348429	177.79	0.9860551	177.79	1.00404	177.79	0.9559235	177.79	1.012929	177.79	1.053455	177.79	-0.1195059	177.8	-0.1756359	177.8	-0.1345326	177.8	-0.1605012	177.8	-0.1299278	177.8	-0.1659041	177.8	-0.1282625	177.8	-0.1173555	177.8	-0.1172244
177.99	0.9960879	177.99	0.9349447	177.99	0.988562	177.99	1.008191	177.99	0.9521082	177.99	1.011278	177.99	1.058008	177.99	-0.1211784	178	-0.1803323	178	-0.1386676	178	-0.1626357	178	-0.1275007	178	-0.1617585	178	-0.1256524	178	-0.1192914	178	-0.1225658
178.19	0.9981907	178.19	0.9328434	178.19	0.9825211	178.19	1.005664	178.19	0.9551442	178.19	1.011733	178.19	1.054993	178.19	-0.1158833	178.2	-0.1719951	178.2	-0.137955	178.2	-0.1610911	178.2	-0.1241822	178.2	-0.1631063	178.2	-0.1259931	178.2	-0.1222324	178.2	-0.1173055
178.39	0.9962306	178.39	0.9392508	178.39	0.9842561	178.39	1.008964	178.39	0.9563072	178.39	1.01731	178.39	1.06162	178.39	-0.1210135	178.4	-0.1767743	178.4	-0.1367126	178.4	-0.1626942	178.4	-0.1264673	178.4	-0.157246	178.4	-0.1274153	178.4	-0.1223613	178.4	-0.1174922
178.59	0.9958224	178.59	0.9360834	178.59	0.9897821	178.59	1.009951	178.59	0.958176	178.59	1.012116	178.59	1.059393	178.59	-0.1114607	178.6	-0.173152	178.6	-0.138698	178.6	-0.1599397	178.6	-0.1267316	178.6	-0.1599752	178.6	-0.1268415	178.6	-0.1250802	178.6	-0.1202804
178.79	0.9959697	178.79	0.9393224	178.79	0.9886731	178.79	1.013927	178.79	0.9485703	178.79	1.016933	178.79	1.061098	178.79	-0.1170833	178.8	-0.1759703	178.8	-0.1365493	178.8	-0.1596057	178.8	-0.1267362	178.8	-0.1626691	178.8	-0.1246489	178.8	-0.1212759	178.8	-0.1163481
178.99	0.9965085	178.99	0.9390174	178.99	0.9911261	178.99	1.006698	178.99	0.9566456	178.99	1.016527	178.99	1.058638	178.99	-0.1203033	179	-0.1725857	179	-0.1366334	179	-0.1623685	179	-0.1212352	179	-0.1618978	179	-0.1307359	179	-0.1229259	179	-0.1162039
179.19	0.9996847	179.19	0.9414749	179.19	0.9871795	179.19	1.00932	179.19	0.9541173	179.19	1.014287	179.19	1.059251	179.19	-0.1212522	179.2	-0.1743361	179.2	-0.1387579	179.2	-0.1649742	179.2	-0.1275889	179.2	-0.1601649	179.2	-0.1278144	179.2	-0.1210183	179.2	-0.1227365
179.39	0.9936235	179.39	0.9398345	179.39	0.990015	179.39	1.009454	179.39	0.9544686	179.39	1.015046	179.39	1.059695	179.39	-0.1175798	179.4	-0.1748176	179.4	-0.1387129	179.4	-0.1625083	179.4	-0.1268352	179.4	-0.1597953	179.4	-0.1260018	179.4	-0.1287227	179.4	-0.1203688
179.59	1.0019	179.59	0.9389951	179.59	0.9917372	179.59	1.006146	179.59	0.9585621	179.59	1.015938	179.59	1.056812	179.59	-0.1175608	179.6	-0.1744298	179.6	-0.135642	179.6	-0.1636377	179.6	-0.1251317	179.6	-0.1619835	179.6	-0.1255757	179.6	-0.1187451	179.6	-0.1189502
179.79	0.999494	179.79	0.9406849	179.79	0.9875166	179.79	1.007682	179.79	0.9534153	179.79	1.017783	179.79	1.060016	179.79	-0.1149796	179.8	-0.1746887	179.8	-0.137723	179.8	-0.1654565	179.8	-0.1199864	179.8	-0.1587205	179.8	-0.1308267	179.8	-0.1227512	179.8	-0.1173364
179.99	1.000395	179.99	0.9421878	179.99	0.9915977	179.99	1.011837	179.99	0.95698	179.99	1.015721	179.99	1.063147	179.99	-0.1145875	180	-0.1684455	180	-0.1388146	180	-0.1638976	180	-0.1221876	180	-0.1580582	180	-0.1225689	180	-0.1217387	180	-0.1182557
180.19	1.000699	180.19	0.9399071	180.19	0.9933779	180.19	1.011485	180.19	0.9557317	180.19	1.015217	180.19	1.060056	180.19	-0.1177226	180.2	-0.1734666	180.2	-0.133649	180.2	-0.1639964	180.2	-0.1297858	180.2	-0.1611592	180.2	-0.1280312	180.2	-0.1217729	180.2	-0.118492
180.39	1.001756	180.39	0.9401737	180.39	0.9893702	180.39	1.012275	180.39	0.9599438	180.39	1.022256	180.39	1.058863	180.39	-0.119054	180.4	-0.1727069	180.4	-0.1337539	180.4	-0.15701	180.4	-0.1257068	180.4	-0.1612135	180.4	-0.1314347	180.4	-0.117666	180.4	-0.1178804
180.59	1.002941	180.59	0.9387634	180.59	0.9924579	180.59	1.010694	180.59	0.9536567	180.59	1.017859	180.59	1.056797	180.59	-0.1147591	180.6	-0.1700474	180.6	-0.1391273	180.6	-0.162418	180.6	-0.1228324	180.6	-0.1555514	180.6	-0.1224046	180.6	-0.1207173	180.6	-0.1158096
180.79	1.002293	180.79	0.9367594	180.79	0.9866601	180.79	1.011982	180.79	0.9582374	180.79	1.0236	180.79	1.061122	180.79	-0.1175676	180.8	-0.1751008	180.8	-0.1353613	180.8	-0.1644638	180.8	-0.1245999	180.8	-0.1539408	180.8	-0.1219221	180.8	-0.1211713	180.8	-0.1174316
180.99	1.000679	180.99	0.9379394	180.99	0.9939057	180.99	1.008905	180.99	0.9601867	180.99	1.017795	180.99	1.062329	180.99	-0.1101057	181	-0.1699966	181	-0.1380232	181	-0.1580782	181	-0.1253666	181	-0.1586888	181	-0.1287728	181	-0.1196665	181	-0.1187252
181.19	0.9977074	181.19	0.9421835	181.19	0.9917263	181.19	1.011506	181.19	0.9558138	181.19	1.024114	181.19	1.063108	181.19	-0.1163587	181.2	-0.1778832	181.2	-0.1356601	181.2	-0.1615603	181.2	-0.1201739	181.2	-0.1587812	181.2	-0.125445	181.2	-0.1198764	181.2	-0.1158009
181.39	1.001454	181.39	0.9462093	181.39	0.9921421	181.39	1.011892	181.39	0.9605851	181.39	1.018007	181.39	1.063288	181.39	-0.1153049	181.4	-0.1731186	181.4	-0.1327345	181.4	-0.1586291	181.4	-0.1261508	181.4	-0.1622722	181.4	-0.1191657	181.4	-0.1201496	181.4	-0.1160417
181.59	1.00112	181.59	0.9414378	181.59	0.9914348	181.59	1.011168	181.59	0.9547316	181.59	1.019056	181.59	1.062054	181.59	-0.1100108	181.6	-0.1786919	181.6	-0.1366651	181.6	-0.1604497	181.6	-0.1237107	181.6	-0.1562642	181.6	-0.1267585	181.6	-0.1184159	181.6	-0.1160777
181.79	1.005723	181.79	0.9418195	181.79	0.9922279	181.79	1.012194	181.79	0.9596367	181.79	1.019183	181.79	1.063268	181.79	-0.1105497	181.8	-0.1704237	181.8	-0.1374084	181.8	-0.1603367	181.8	-0.1200798	181.8	-0.1624419	181.8	-0.1252178	181.8	-0.1203287	181.8	-0.1165198
181.99	1.000079	181.99	0.9408355	181.99	0.9903794	181.99	1.017126	181.99	0.9550467	181.99	1.021246	181.99	1.062467	181.99	-0.1114121	182	-0.1725253	182	-0.1365249	182	-0.1655473	182	-0.1228939	182	-0.1578114	182	-0.128069	182	-0.1185194	182	-0.115578
182.2	0.99607	182.2	0.9409849	182.2	0.9917569	182.2	1.01447	182.2	0.9594377	182.2	1.020193	182.2	1.061101	182.2	-0.114147	182.19	-0.1751987	182.19	-0.132363	182.19	-0.1566409	182.19	-0.1238362	182.19	-0.1613357	182.19	-0.1261208	182.19	-0.1170721	182.19	-0.1155521
182.39	1.000919	182.39	0.9413846	182.39	0.9946723	182.39	1.01732	182.39	0.9593745	182.39	1.018478	182.39	1.063461	182.39	-0.1167361	182.4	-0.1743627	182.4	-0.1326426	182.4	-0.1600549	182.4	-0.1274464	182.4	-0.1625447	182.4	-0.1180391	182.4	-0.1212156	182.4	-0.1161026
182.59	1.002348	182.59	0.9402817	182.59	0.9938595	182.59	1.007808	182.59	0.96153	182.59	1.017449	182.59	1.065781	182.59	-0.1093718	182.6	-0.1706351	182.6	-0.1294704	182.6	-0.1607822	182.6	-0.120639	182.6	-0.1558243	182.6	-0.1259473	182.6	-0.1182317	182.6	-0.1189375
182.79	1.000298	182.79	0.9403585	182.79	0.9921778	182.79	1.00958	182.79	0.9559881	182.79	1.016753	182.79	1.06236	182.79	-0.1124416	182.8	-0.1716424	182.8	-0.1341068	182.8	-0.1586927	182.8	-0.1205932	182.8	-0.1557528	182.8	-0.1246738	182.8	-0.1199249	182.8	-0.1174081
182.99	1.006564	182.99	0.9405822	182.99	0.9926203	182.99	1.014487	182.99	0.9589125	182.99	1.02038	182.99	1.061908	182.99	-0.112287	183	-0.1726852	183	-0.1336834	183	-0.1595133	183	-0.1250751	183	-0.1583965	183	-0.1272679	183	-0.1203548	183	-0.118902
183.19	1.004831	183.19	0.9383869	183.19	0.9898908	183.19	1.01299	183.19	0.960002	183.19	1.026072	183.19	1.06604	183.19	-0.1146084	183.2	-0.1678083	183.2	-0.1345544	183.2	-0.1593231	183.2	-0.1206952	183.2	-0.161574	183.2	-0.1225032	183.2	-0.1181978	183.2	-0.1173389
183.39	1.006236	183.39	0.9408954	183.39	0.9927734	183.39	1.021158	183.39	0.9648066	183.39	1.021359	183.39	1.060535	183.39	-0.1175338	183.4	-0.1705081	183.4	-0.1324671	183.4	-0.1611921	183.4	-0.1237015	183.4	-0.1600235	183.4	-0.1248157	183.4	-0.1192114	183.4	-0.1125485
183.59	1.006033	183.59	0.9459381	183.59	0.9932327	183.59	1.010519	183.59	0.9627024	183.59	1.02291	183.59	1.067136	183.59	-0.1133984	183.6	-0.1735392	183.6	-0.1334752	183.6	-0.1575375	183.6	-0.1252614	183.6	-0.1594713	183.6	-0.1272722	183.6	-0.1196122	183.6	-0.1101201
183.79	1.003283	183.79	0.9431738	183.79	0.9928383	183.79	1.01541	183.79	0.9628238	183.79	1.017901	183.79	1.06351	183.79	-0.1069435	183.8	-0.1716403	183.8	-0.1361994	183.8	-0.1592616	183.8	-0.1232534	183.8	-0.1548755	183.8	-0.1188608	183.8	-0.1184146	183.8	-0.110693
183.99	1.003056	183.99	0.9437817	183.99	0.9955667	183.99	1.01431	183.99	0.9641739	183.99	1.021887	183.99	1.068768	183.99	-0.1139136	184	-0.1707799	184	-0.1349602	184	-0.1574667	184	-0.1166817	184	-0.1632852	184	-0.1229847	184	-0.114847	184	-0.1175905
184.19	1.000885	184.19	0.9421604	184.19	0.9942734	184.19	1.020535	184.19	0.9620709	184.19	1.021884	184.19	1.065015	184.19	-0.1118974	184.2	-0.1677857	184.2	-0.1307323	184.2	-0.1616658	184.2	-0.1238632	184.2	-0.1610916	184.2	-0.1224582	184.2	-0.1191331	184.2	-0.1150178
184.39	1.000586	184.39	0.9444483	184.39	0.9901255	184.39	1.0108	184.39	0.9633411	184.39	1.023946	184.39	1.069021	184.39	-0.1086448	184.4	-0.1714146	184.4	-0.1351134	184.4	-0.1561831	184.4	-0.1233009	184.4	-0.1544772	184.4	-0.1253522	184.4	-0.1179142	184.4	-0.111985
184.59	1.000775	184.59	0.9428692	184.59	0.9950725	184.59	1.01544	184.59	0.9598042	184.59	1.027442	184.59	1.063631	184.59	-0.1102678	184.6	-0.1740427	184.6	-0.1331469	184.6	-0.1577877	184.6	-0.1205038	184.6	-0.1608506	184.6	-0.1266674	184.6	-0.118312	184.6	-0.1175024
184.79	1.006925	184.79	0.9466443	184.79	0.9914904	184.79	1.011831	184.79	0.9694548	184.79	1.023016	184.79	1.063297	184.79	-0.1127551	184.8	-0.1688664	184.8	-0.1372898	184.8	-0.1545237	184.8	-0.1191613	184.8	-0.1564933	184.8	-0.1260421	184.8	-0.1219185	184.8	-0.1132498
184.99	1.004318	184.99	0.9441731	184.99	0.9964962	184.99	1.016874	184.99	0.9664935	184.99	1.022836	184.99	1.064457	184.99	-0.1131693	185	-0.1676701	185	-0.130806	185	-0.1570784	185	-0.1276113	185	-0.1544332	185	-0.121951	185	-0.1163429	185	-0.1095296
185.19	1.008012	185.19	0.9428165	185.19	0.9998282	185.19	1.013203	185.19	0.9600032	185.19	1.022321	185.19	1.066861	185.19	-0.1158961	185.2	-0.169223	185.2	-0.1307093	185.2	-0.1579175	185.2	-0.1234901	185.2	-0.1567793	185.2	-0.1235114	185.2	-0.1195575	185.2	-0.1149509
185.39	1.006341	185.39	0.9459125	185.39	0.9981543	185.39	1.019532	185.39	0.959498	185.39	1.020595	185.39	1.060354	185.39	-0.1158525	185.4	-0.1689799	185.4	-0.127071	185.4	-0.1621883	185.4	-0.1158655	185.4	-0.1596653	185.4	-0.1206994	185.4	-0.115019	185.4	-0.1155129
185.59	1.00246	185.59	0.9429262	185.59	0.9931422	185.59	1.01521	185.59	0.9600589	185.59	1.024318	185.59	1.067079	185.59	-0.1090051	185.6	-0.1665597	185.6	-0.1369276	185.6	-0.1570217	185.6	-0.1184234	185.6	-0.1602262	185.6	-0.1221596	185.6	-0.1130664	185.6	-0.1164581
185.79	1.001942	185.79	0.9474748	185.79	0.9968884	185.79	1.017911	185.79	0.966697	185.79	1.018229	185.79	1.067699	185.79	-0.1135671	185.8	-0.1682768	185.8	-0.1301445	185.8	-0.1569216	185.8	-0.1188631	185.8	-0.1574556	185.8	-0.1204487	185.8	-0.1099301	185.8	-0.1150719
185.99	1.007851	185.99	0.9428896	185.99	1.001009	185.99	1.013337	185.99	0.9604596	185.99	1.020803	185.99	1.064426	185.99	-0.1129702	185.99	-0.1669095	185.99	-0.1315582	185.99	-0.157858	185.99	-0.1235118	185.99	-0.1533054	185.99	-0.1250169	185.99	-0.1200131	185.99	-0.1181358
186.19	1.002091	186.19	0.951807	186.19	0.9993922	186.19	1.017953	186.19	0.9620242	186.19	1.021849	186.19	1.065304	186.19	-0.1095151	186.2	-0.1694887	186.2	-0.1261715	186.2	-0.1612907	186.2	-0.1223374	186.2	-0.1568051	186.2	-0.1220535	186.2	-0.1175204	186.2	-0.1105424
186.39	1.003269	186.39	0.9450991	186.39	0.9946557	186.39	1.014775	186.39	0.9672725	186.39	1.021561	186.39	1.063687	186.39	-0.108573	186.4	-0.164752	186.4	-0.1303533	186.4	-0.1551934	186.4	-0.1217063	186.4	-0.1530731	186.4	-0.1170898	186.4	-0.1131231	186.4	-0.1155816
186.59	1.009882	186.59	0.9444688	186.59	0.9980065	186.59	1.01469	186.59	0.9588311	186.59	1.01811	186.59	1.068104	186.59	-0.1110994	186.6	-0.1684482	186.6	-0.129123	186.6	-0.1574626	186.6	-0.1176026	186.6	-0.154158	186.6	-0.1236327	186.6	-0.1171723	186.6	-0.1100068
186.79	1.00819	186.79	0.9458684	186.79	1.003236	186.79	1.021002	186.79	0.9651687	186.79	1.02442	186.79	1.067472	186.79	-0.1116712	186.79	-0.170527	186.79	-0.1280351	186.79	-0.1578613	186.79	-0.1176042	186.79	-0.1526055	186.79	-0.1168672	186.79	-0.1104143	186.79	-0.114152
186.99	1.003816	186.99	0.9441553	186.99	0.9967134	186.99	1.017395	186.99	0.9686888	186.99	1.024117	186.99	1.064795	186.99	-0.1069625	186.99	-0.1729961	186.99	-0.1311253	186.99	-0.1575389	186.99	-0.1225812	186.99	-0.1562663	186.99	-0.1223176	186.99	-0.115099	186.99	-0.113306
187.19	1.006794	187.19	0.9433157	187.19	0.9964433	187.19	1.017606	187.19	0.9658964	187.19	1.02771	187.19	1.065114	187.19	-0.1125594	187.19	-0.1692025	187.19	-0.1303982	187.19	-0.1551624	187.19	-0.1211154	187.19	-0.1561872	187.19	-0.1199099	187.19	-0.1127248	187.19	-0.1116733
187.39	1.007413	187.39	0.9452266	187.39	0.9959695	187.39	1.018541	187.39	0.962677	187.39	1.024909	187.39	1.068408	187.39	-0.1092559	187.4	-0.1722327	187.4	-0.1281079	187.4	-0.154358	187.4	-0.1169742	187.4	-0.1520481	187.4	-0.1252616	187.4	-0.1148526	187.4	-0.1136649
187.59	1.003272	187.59	0.9444661	187.59	0.9952069	187.59	1.020142	187.59	0.9621488	187.59	1.026125	187.59	1.067247	187.59	-0.1069592	187.6	-0.166444	187.6	-0.1267009	187.6	-0.1537107	187.6	-0.1137591	187.6	-0.1539665	187.6	-0.1214039	187.6	-0.1124216	187.6	-0.1148659
187.79	1.00388	187.79	0.9490232	187.79	0.998965	187.79	1.019951	187.79	0.9657481	187.79	1.028779	187.79	1.067964	187.79	-0.1127831	187.8	-0.1696278	187.8	-0.1302058	187.8	-0.1527652	187.8	-0.1187163	187.8	-0.1562156	187.8	-0.1198831	187.8	-0.118305	187.8	-0.112629
187.99	1.003758	187.99	0.9428467	187.99	0.9985134	187.99	1.023895	187.99	0.9655212	187.99	1.024682	187.99	1.061281	187.99	-0.1139177	188	-0.1711427	188	-0.1288553	188	-0.1561587	188	-0.1227029	188	-0.1526365	188	-0.118852	188	-0.1162196	188	-0.1134854
188.19	1.008952	188.19	0.9478854	188.19	0.9998948	188.19	1.023153	188.19	0.9649654	188.19	1.030948	188.19	1.069835	188.19	-0.110544	188.2	-0.1679527	188.2	-0.1313971	188.2	-0.1539911	188.2	-0.1188881	188.2	-0.1552648	188.2	-0.1221755	188.2	-0.1148097	188.2	-0.1074501
188.39	1.007523	188.39	0.9445497	188.39	0.9956517	188.39	1.021133	188.39	0.9666592	188.39	1.027701	188.39	1.069818	188.39	-0.1090002	188.4	-0.1687161	188.4	-0.1268291	188.4	-0.1561625	188.4	-0.1229004	188.4	-0.1494087	188.4	-0.1211582	188.4	-0.1139691	188.4	-0.1123223
188.59	1.005313	188.59	0.9470358	188.59	1.004096	188.59	1.022983	188.59	0.9654429	188.59	1.026729	188.59	1.06621	188.59	-0.1122613	188.6	-0.1671863	188.6	-0.1282057	188.6	-0.1509946	188.6	-0.1182275	188.6	-0.151902	188.6	-0.1226969	188.6	-0.1161131	188.6	-0.1138642
188.79	1.007384	188.79	0.9455657	188.79	0.998395	188.79	1.021127	188.79	0.9674197	188.79	1.023666	188.79	1.071176	188.79	-0.1086524	188.8	-0.1674218	188.8	-0.1250553	188.8	-0.155514	188.8	-0.1154033	188.8	-0.1539664	188.8	-0.118811	188.8	-0.1160837	188.8	-0.1145091
188.99	1.008718	188.99	0.9463118	188.99	1.002805	188.99	1.022416	188.99	0.9647218	188.99	1.030568	188.99	1.069093	188.99	-0.1080242	189	-0.1655821	189	-0.1273372	189	-0.1587386	189	-0.1157414	189	-0.1517733	189	-0.1198945	189	-0.1131162	189	-0.1138928
189.19	1.008407	189.19	0.9496964	189.19	0.9967375	189.19	1.016561	189.19	0.9686169	189.19	1.024982	189.19	1.068173	189.19	-0.1060577	189.2	-0.1660224	189.2	-0.1277362	189.2	-0.1527443	189.2	-0.1156313	189.2	-0.1558414	189.2	-0.1193058	189.2	-0.1132226	189.2	-0.1099927
189.39	1.005318	189.39	0.9507702	189.39	0.9978797	189.39	1.016319	189.39	0.968285	189.39	1.028149	189.39	1.065782	189.39	-0.1067188	189.4	-0.1637239	189.4	-0.1289581	189.4	-0.1601547	189.4	-0.114493	189.4	-0.1543956	189.4	-0.1206552	189.4	-0.1114389	189.4	-0.1117979
189.59	1.008884	189.59	0.9425924	189.59	0.9967936	189.59	1.021324	189.59	0.9686844	189.59	1.023758	189.59	1.069821	189.59	-0.1106962	189.6	-0.1647812	189.6	-0.1267056	189.6	-0.1502448	189.6	-0.1145806	189.6	-0.1540028	189.6	-0.1200855	189.6	-0.1158849	189.6	-0.1116733
189.79	1.009583	189.79	0.9437267	189.79	1.003378	189.79	1.019853	189.79	0.966875	189.79	1.026521	189.79	1.070622	189.79	-0.1056485	189.8	-0.1685993	189.8	-0.1216598	189.8	-0.1499455	189.8	-0.1198632	189.8	-0.1481343	189.8	-0.114686	189.8	-0.1137596	189.8	-0.1138077
189.99	1.009	189.99	0.9443793	189.99	1.000037	189.99	1.021631	189.99	0.9702024	189.99	1.022641	189.99	1.07129	189.99	-0.1086755	189.99	-0.1667642	189.99	-0.1247232	189.99	-0.1520742	189.99	-0.1164135	189.99	-0.1520225	189.99	-0.1151527	189.99	-0.1154914	189.99	-0.1145304
190.19	1.009256	190.19	0.946509	190.19	1.003171	190.19	1.02401	190.19	0.9665785	190.19	1.026571	190.19	1.069852	190.19	-0.1088888	190.2	-0.1630645	190.2	-0.1318869	190.2	-0.1539954	190.2	-0.1099498	190.2	-0.1523526	190.2	-0.1203405	190.2	-0.1148605	190.2	-0.1112887
190.39	1.006502	190.39	0.9466332	190.39	0.9985803	190.39	1.021563	190.39	0.9628323	190.39	1.026607	190.39	1.068267	190.39	-0.1067255	190.4	-0.1670244	190.4	-0.12484	190.4	-0.1558563	190.4	-0.116888	190.4	-0.1538184	190.4	-0.1204908	190.4	-0.1136627	190.4	-0.1128488
190.59	1.008565	190.59	0.9426302	190.59	1.003883	190.59	1.024117	190.59	0.9690551	190.59	1.028857	190.59	1.063765	190.59	-0.1052554	190.6	-0.1674065	190.6	-0.129374	190.6	-0.1539228	190.6	-0.1153865	190.6	-0.15501	190.6	-0.1188362	190.6	-0.1109342	190.6	-0.1137072
190.79	1.010964	190.79	0.9462537	190.79	1.000328	190.79	1.02117	190.79	0.9696397	190.79	1.025533	190.79	1.073568	190.79	-0.1033262	190.79	-0.1655428	190.79	-0.1248985	190.79	-0.1571594	190.79	-0.1180014	190.79	-0.1555959	190.79	-0.1162242	190.79	-0.1147225	190.79	-0.1103371
190.99	1.009362	190.99	0.9484599	190.99	1.004548	190.99	1.020683	190.99	0.9672599	190.99	1.025752	190.99	1.072013	190.99	-0.1085174	190.99	-0.1681591	190.99	-0.1287312	190.99	-0.1523362	190.99	-0.1147661	190.99	-0.1526477	190.99	-0.1212564	190.99	-0.119245	190.99	-0.1106892
191.19	1.00814	191.19	0.9452686	191.19	1.00048	191.19	1.021042	191.19	0.967159	191.19	1.029054	191.19	1.072812	191.19	-0.1090941	191.2	-0.1688135	191.2	-0.1281491	191.2	-0.1556796	191.2	-0.1135903	191.2	-0.152812	191.2	-0.1167777	191.2	-0.1108991	191.2	-0.1129236
191.39	1.012682	191.39	0.9489343	191.39	1.004499	191.39	1.020924	191.39	0.9598252	191.39	1.030473	191.39	1.070152	191.39	-0.1075083	191.4	-0.1640838	191.4	-0.1243056	191.4	-0.1536825	191.4	-0.1152189	191.4	-0.1504787	191.4	-0.1149367	191.4	-0.1143453	191.4	-0.1105204
191.59	1.00527	191.59	0.947188	191.59	0.9974095	191.59	1.024408	191.59	0.9700512	191.59	1.034343	191.59	1.070414	191.59	-0.109155	191.6	-0.1638347	191.6	-0.1285192	191.6	-0.1472622	191.6	-0.1158339	191.6	-0.1537727	191.6	-0.1140313	191.6	-0.109096	191.6	-0.1104771
191.79	1.007094	191.79	0.9492419	191.79	1.000559	191.79	1.021242	191.79	0.9647191	191.79	1.027409	191.79	1.068845	191.79	-0.1076653	191.79	-0.1648512	191.79	-0.1256758	191.79	-0.152217	191.79	-0.1108122	191.79	-0.149138	191.79	-0.119647	191.79	-0.1137841	191.79	-0.1087346
191.99	1.007612	191.99	0.9475898	191.99	1.001695	191.99	1.020843	191.99	0.9675913	191.99	1.030396	191.99	1.070315	191.99	-0.1064129	192	-0.1640386	192	-0.1292921	192	-0.1531577	192	-0.1102369	192	-0.1532264	192	-0.1202176	192	-0.111315	192	-0.1131605
192.19	1.015534	192.19	0.950597	192.19	1.00416	192.19	1.02621	192.19	0.9722044	192.19	1.02837	192.19	1.071539	192.19	-0.1003327	192.2	-0.165962	192.2	-0.1227017	192.2	-0.1538652	192.2	-0.1127154	192.2	-0.1500034	192.2	-0.1166291	192.2	-0.1099657	192.2	-0.1103734
192.39	1.012549	192.39	0.9540029	192.39	1.001961	192.39	1.024786	192.39	0.9669824	192.39	1.032209	192.39	1.078304	192.39	-0.1047959	192.4	-0.1642356	192.4	-0.1252494	192.4	-0.1503202	192.4	-0.115952	192.4	-0.1533915	192.4	-0.1185262	192.4	-0.1153492	192.4	-0.1090918
192.59	1.013032	192.59	0.9429425	192.59	1.004768	192.59	1.025861	192.59	0.9709337	192.59	1.032673	192.59	1.076832	192.59	-0.1054624	192.6	-0.167443	192.6	-0.1230695	192.6	-0.1534141	192.6	-0.1117176	192.6	-0.1467797	192.6	-0.1166001	192.6	-0.1135928	192.6	-0.1093123
192.79	1.01039	192.79	0.948086	192.79	1.006343	192.79	1.027003	192.79	0.9641974	192.79	1.03266	192.79	1.073463	192.79	-0.1090975	192.79	-0.1649899	192.79	-0.1235517	192.79	-0.1530484	192.79	-0.1139258	192.79	-0.1534042	192.79	-0.1193402	192.79	-0.1103792	192.79	-0.1103833
192.99	1.007761	192.99	0.9493548	192.99	1.001178	192.99	1.027788	192.99	0.967157	192.99	1.02975	192.99	1.078358	192.99	-0.1105393	193	-0.1682428	193	-0.1242824	193	-0.1526099	193	-0.1144905	193	-0.1512505	193	-0.1172629	193	-0.112075	193	-0.114395
193.19	1.008427	193.19	0.9560531	193.19	1.007076	193.19	1.026349	193.19	0.9644508	193.19	1.029984	193.19	1.07118	193.19	-0.1081021	193.2	-0.1614336	193.2	-0.1250673	193.2	-0.1512651	193.2	-0.1158033	193.2	-0.1553224	193.2	-0.1180247	193.2	-0.1137716	193.2	-0.1083512
193.39	1.014119	193.39	0.9473859	193.39	1.001124	193.39	1.024659	193.39	0.9717885	193.39	1.025445	193.39	1.07701	193.39	-0.1043896	193.39	-0.166255	193.39	-0.1234996	193.39	-0.1537003	193.39	-0.1103036	193.39	-0.1540951	193.39	-0.117319	193.39	-0.1108401	193.39	-0.1117669
193.59	1.010088	193.59	0.950327	193.59	1.005504	193.59	1.024782	193.59	0.9671427	193.59	1.030491	193.59	1.069652	193.59	-0.1061481	193.59	-0.1675063	193.59	-0.1252775	193.59	-0.1492345	193.59	-0.1150648	193.59	-0.149448	193.59	-0.1152526	193.59	-0.1099654	193.59	-0.1079804
193.79	1.010076	193.79	0.9551092	193.79	0.997452	193.79	1.025727	193.79	0.9699539	193.79	1.029401	193.79	1.07754	193.79	-0.1056297	193.79	-0.1615831	193.79	-0.126659	193.79	-0.1550722	193.79	-0.1110056	193.79	-0.1532883	193.79	-0.1172698	193.79	-0.1106688	193.79	-0.1062781
193.99	1.012389	193.99	0.9518809	193.99	1.003793	193.99	1.030176	193.99	0.9693537	193.99	1.030875	193.99	1.072029	193.99	-0.1041362	194	-0.1598445	194	-0.1262313	194	-0.1536509	194	-0.1134274	194	-0.1469105	194	-0.1150767	194	-0.1113748	194	-0.1081126
194.19	1.013258	194.19	0.9526973	194.19	1.005591	194.19	1.030047	194.19	0.9732984	194.19	1.026652	194.19	1.073519	194.19	-0.105035	194.2	-0.1632803	194.2	-0.1245805	194.2	-0.1496907	194.2	-0.1113456	194.2	-0.1489493	194.2	-0.1138441	194.2	-0.1112694	194.2	-0.1099737
194.39	1.011452	194.39	0.9520508	194.39	1.003681	194.39	1.028974	194.39	0.9681265	194.39	1.032241	194.39	1.072694	194.39	-0.1056416	194.4	-0.1626319	194.4	-0.1204443	194.4	-0.1461635	194.4	-0.1119194	194.4	-0.1499538	194.4	-0.1156363	194.4	-0.1086983	194.4	-0.1103402
194.59	1.013122	194.59	0.9494472	194.59	1.001803	194.59	1.021189	194.59	0.9699207	194.59	1.03206	194.59	1.074585	194.59	-0.1081907	194.6	-0.1631972	194.6	-0.1255569	194.6	-0.1484782	194.6	-0.1123254	194.6	-0.1482716	194.6	-0.1161495	194.6	-0.1099565	194.6	-0.1080346
194.79	1.013146	194.79	0.9491069	194.79	1.001176	194.79	1.027803	194.79	0.9677309	194.79	1.02986	194.79	1.071941	194.79	-0.1084544	194.79	-0.1595039	194.79	-0.1265465	194.79	-0.1530879	194.79	-0.1094644	194.79	-0.1485954	194.79	-0.1115392	194.79	-0.1121182	194.79	-0.1058679
194.99	1.006123	194.99	0.9554687	194.99	1.001233	194.99	1.030295	194.99	0.9692513	194.99	1.031744	194.99	1.073474	194.99	-0.1058922	195	-0.1628527	195	-0.1224319	195	-0.153385	195	-0.1103718	195	-0.1503878	195	-0.1158979	195	-0.1101395	195	-0.1081839
195.19	1.010126	195.19	0.952593	195.19	1.005517	195.19	1.033258	195.19	0.9695998	195.19	1.03241	195.19	1.076671	195.19	-0.1020008	195.19	-0.1621669	195.19	-0.1221834	195.19	-0.1520976	195.19	-0.1098094	195.19	-0.1479167	195.19	-0.1129082	195.19	-0.1064564	195.19	-0.1051601
195.39	1.011447	195.39	0.9563577	195.39	1.004347	195.39	1.025823	195.39	0.9716455	195.39	1.033924	195.39	1.075766	195.39	-0.1065235	195.39	-0.1587234	195.39	-0.1257445	195.39	-0.1530096	195.39	-0.1135614	195.39	-0.1514335	195.39	-0.1147562	195.39	-0.1068962	195.39	-0.1046732
195.59	1.014676	195.59	0.9502174	195.59	1.010768	195.59	1.028323	195.59	0.9727742	195.59	1.036021	195.59	1.073387	195.59	-0.1081953	195.6	-0.1616664	195.6	-0.125605	195.6	-0.1466148	195.6	-0.1133224	195.6	-0.1492159	195.6	-0.1133125	195.6	-0.1097788	195.6	-0.1113574
195.79	1.01201	195.79	0.9525856	195.79	1.008143	195.79	1.025253	195.79	0.9679055	195.79	1.036214	195.79	1.078509	195.79	-0.1046435	195.79	-0.1564353	195.79	-0.1228456	195.79	-0.1482787	195.79	-0.1100151	195.79	-0.1468337	195.79	-0.1120422	195.79	-0.1115857	195.79	-0.1075813
195.99	1.015697	195.99	0.9498246	195.99	1.002989	195.99	1.030518	195.99	0.97241	195.99	1.032863	195.99	1.078187	195.99	-0.104682	195.99	-0.1621536	195.99	-0.1240154	195.99	-0.1461716	195.99	-0.1073507	195.99	-0.1515089	195.99	-0.1191264	195.99	-0.1062828	195.99	-0.1105107
196.19	1.017393	196.19	0.9575159	196.19	1.004394	196.19	1.03112	196.19	0.9684584	196.19	1.033611	196.19	1.073216	196.19	-0.1015377	196.2	-0.1618622	196.2	-0.1260954	196.2	-0.1525043	196.2	-0.1104464	196.2	-0.1493661	196.2	-0.1160998	196.2	-0.105072	196.2	-0.1090703
196.39	1.016019	196.39	0.9517837	196.39	1.005517	196.39	1.029651	196.39	0.9750241	196.39	1.030238	196.39	1.073547	196.39	-0.1022341	196.39	-0.1610509	196.39	-0.1230119	196.39	-0.1507558	196.39	-0.1067035	196.39	-0.1456161	196.39	-0.1142302	196.39	-0.107669	196.39	-0.1117633
196.59	1.013887	196.59	0.9533898	196.59	1.004667	196.59	1.022222	196.59	0.969548	196.59	1.03471	196.59	1.075557	196.59	-0.1072816	196.6	-0.1595564	196.6	-0.1225908	196.6	-0.1512765	196.6	-0.1083647	196.6	-0.1480591	196.6	-0.1169215	196.6	-0.1117633	196.6	-0.1071974
196.79	1.013198	196.79	0.9560072	196.79	1.00724	196.79	1.028882	196.79	0.9727542	196.79	1.032444	196.79	1.078088	196.79	-0.1026203	196.8	-0.1592145	196.8	-0.1250365	196.8	-0.1483546	196.8	-0.1074204	196.8	-0.1445635	196.8	-0.1152522	196.8	-0.106264	196.8	-0.1081334
196.99	1.016062	196.99	0.9548659	196.99	1.011722	196.99	1.027183	196.99	0.9717842	196.99	1.031596	196.99	1.073982	196.99	-0.102295	197	-0.1557858	197	-0.125775	197	-0.1522957	197	-0.1098686	197	-0.1450834	197	-0.1173228	197	-0.1063239	197	-0.1115885
197.19	1.015455	197.19	0.9567164	197.19	1.00854	197.19	1.02889	197.19	0.9712067	197.19	1.028717	197.19	1.082066	197.19	-0.1060386	197.19	-0.1602904	197.19	-0.1208804	197.19	-0.1505253	197.19	-0.1093346	197.19	-0.1485009	197.19	-0.1109024	197.19	-0.106072	197.19	-0.1056124
197.39	1.012416	197.39	0.9552119	197.39	1.013081	197.39	1.027478	197.39	0.9705026	197.39	1.034658	197.39	1.078467	197.39	-0.1041461	197.4	-0.1594852	197.4	-0.1198343	197.4	-0.1453995	197.4	-0.1093973	197.4	-0.149	197.4	-0.1080948	197.4	-0.1067077	197.4	-0.1021858
197.59	1.016982	197.59	0.9523863	197.59	1.01043	197.59	1.029821	197.59	0.9745567	197.59	1.029853	197.59	1.07283	197.59	-0.09994123	197.6	-0.1597288	197.6	-0.1191263	197.6	-0.15028	197.6	-0.1112549	197.6	-0.1470679	197.6	-0.1119032	197.6	-0.1113497	197.6	-0.1054838
197.79	1.011622	197.79	0.9502299	197.79	1.009069	197.79	1.030989	197.79	0.9761027	197.79	1.035565	197.79	1.071978	197.79	-0.1005081	197.79	-0.1573345	197.79	-0.1176154	197.79	-0.1480173	197.79	-0.1063594	197.79	-0.149933	197.79	-0.1121818	197.79	-0.1040596	197.79	-0.1048845
197.99	1.006261	197.99	0.9521608	197.99	1.008252	197.99	1.030916	197.99	0.9748251	197.99	1.032681	197.99	1.082235	197.99	-0.10031	198	-0.1603227	198	-0.1234922	198	-0.1455901	198	-0.111999	198	-0.1442808	198	-0.1107143	198	-0.1082393	198	-0.1044199
198.19	1.019244	198.19	0.9508743	198.19	1.009242	198.19	1.028461	198.19	0.9738255	198.19	1.030764	198.19	1.076666	198.19	-0.1027147	198.2	-0.1604337	198.2	-0.1226944	198.2	-0.1460169	198.2	-0.1121985	198.2	-0.1451138	198.2	-0.1148069	198.2	-0.10949	198.2	-0.104949
198.39	1.015768	198.39	0.9531749	198.39	1.006723	198.39	1.029532	198.39	0.9691835	198.39	1.033232	198.39	1.07882	198.39	-0.1027263	198.4	-0.1598075	198.4	-0.1170873	198.4	-0.1475642	198.4	-0.109123	198.4	-0.1476498	198.4	-0.1127238	198.4	-0.1041099	198.4	-0.104882
198.59	1.00946	198.59	0.9561918	198.59	1.006373	198.59	1.032347	198.59	0.968805	198.59	1.035967	198.59	1.073234	198.59	-0.1059848	198.6	-0.1608882	198.6	-0.1201116	198.6	-0.1469498	198.6	-0.1120111	198.6	-0.1494467	198.6	-0.1128594	198.6	-0.1088675	198.6	-0.1053474
198.79	1.014091	198.79	0.952776	198.79	1.010226	198.79	1.028274	198.79	0.9707776	198.79	1.03674	198.79	1.077903	198.79	-0.1048124	198.8	-0.1583232	198.8	-0.1229725	198.8	-0.1485589	198.8	-0.1084907	198.8	-0.145921	198.8	-0.1127199	198.8	-0.1057839	198.8	-0.1066981
198.99	1.01765	198.99	0.9546518	198.99	1.00555	198.99	1.032394	198.99	0.9749041	198.99	1.038973	198.99	1.081295	198.99	-0.1039544	198.99	-0.1622336	198.99	-0.1193409	198.99	-0.148665	198.99	-0.1095995	198.99	-0.1458288	198.99	-0.1111035	198.99	-0.1069577	198.99	-0.1089976
199.19	1.017289	199.19	0.9561158	199.19	1.009888	199.19	1.031342	199.19	0.9719149	199.19	1.036236	199.19	1.078903	199.19	-0.1059644	199.19	-0.1600942	199.19	-0.119387	199.19	-0.1448443	199.19	-0.1085847	199.19	-0.1436666	199.19	-0.1135779	199.19	-0.09952392	199.19	-0.1045258
199.39	1.015304	199.39	0.9547983	199.39	1.005897	199.39	1.034785	199.39	0.9746723	199.39	1.034868	199.39	1.077546	199.39	-0.09866123	199.39	-0.1648362	199.39	-0.1232934	199.39	-0.1474526	199.39	-0.1066329	199.39	-0.1430544	199.39	-0.1095465	199.39	-0.1049175	199.39	-0.1010026
199.59	1.014439	199.59	0.9541925	199.59	1.013403	199.59	1.03092	199.59	0.9757828	199.59	1.038659	199.59	1.081379	199.59	-0.1037519	199.6	-0.1576204	199.6	-0.1194215	199.6	-0.147799	199.6	-0.110643	199.6	-0.1460947	199.6	-0.1130472	199.6	-0.1041811	199.6	-0.1030046
199.79	1.016146	199.79	0.9545032	199.79	1.007868	199.79	1.02894	199.79	0.9765703	199.79	1.040139	199.79	1.079292	199.79	-0.1031062	199.79	-0.1581518	199.79	-0.1209309	199.79	-0.1469003	199.79	-0.110023	199.79	-0.1469209	199.79	-0.1122663	199.79	-0.1064905	199.79	-0.1032937
199.99	1.038659	199.99	0.9756981	199.99	1.029422	199.99	1.059273	199.99	0.9987065	199.99	1.065737	199.99	1.10199	199.99	-0.08108281	199.99	-0.1519286	199.99	-0.1143229	199.99	-0.1341029	199.99	-0.1000084	199.99	-0.1353165	199.99	-0.09908361	199.99	-0.09441308	199.99	-0.09357875
200.19	1.041987	200.19	0.9818592	200.19	1.033249	200.19	1.058049	200.19	1.001557	200.19	1.064015	200.19	1.107166	200.19	-0.07900239	200.19	-0.149856	200.19	-0.1153719	200.19	-0.1377896	200.19	-0.09790539	200.19	-0.1314141	200.19	-0.09838735	200.19	-0.1001074	200.19	-0.09431282
200.4	1.040526	200.4	0.9803587	200.4	1.033273	200.4	1.060491	200.4	1.001166	200.4	1.065328	200.4	1.102068	200.4	-0.07850097	200.39	-0.1507403	200.39	-0.1150843	200.39	-0.1306947	200.39	-0.09579881	200.39	-0.1321968	200.39	-0.09736753	200.39	-0.1005651	200.39	-0.09441815
200.59	1.039327	200.59	0.97942	200.59	1.031424	200.59	1.058079	200.59	0.9983274	200.59	1.068469	200.59	1.102336	200.59	-0.0827805	200.59	-0.1529282	200.59	-0.1113329	200.59	-0.1382656	200.59	-0.09960173	200.59	-0.1384715	200.59	-0.100357	200.59	-0.09602507	200.59	-0.0937698
200.79	1.045516	200.79	0.9829468	200.79	1.038327	200.79	1.06186	200.79	1.00028	200.79	1.065102	200.79	1.102593	200.79	-0.07683411	200.79	-0.155783	200.79	-0.1078694	200.79	-0.1398935	200.79	-0.09933064	200.79	-0.141772	200.79	-0.09684709	200.79	-0.09780934	200.79	-0.09561206
200.99	1.048725	200.99	0.9859141	200.99	1.039375	200.99	1.062573	200.99	1.000484	200.99	1.068796	200.99	1.102575	200.99	-0.07490324	200.99	-0.1503078	200.99	-0.1148284	200.99	-0.1341254	200.99	-0.1007156	200.99	-0.1344397	200.99	-0.1005223	200.99	-0.0978886	200.99	-0.09098177
201.19	1.059798	201.19	0.9846536	201.19	1.038722	201.19	1.062548	201.19	1.006448	201.19	1.068651	201.19	1.102809	201.19	-0.07829782	201.19	-0.1564344	201.19	-0.1112305	201.19	-0.1331899	201.19	-0.09566853	201.19	-0.1367642	201.19	-0.0997021	201.19	-0.09643049	201.19	-0.09101643
201.4	1.057763	201.4	0.9902523	201.4	1.037825	201.4	1.06105	201.4	1.004716	201.4	1.06874	201.4	1.109405	201.4	-0.07434019	201.39	-0.150745	201.39	-0.1112599	201.39	-0.13456	201.39	-0.09502295	201.39	-0.1359752	201.39	-0.09131472	201.39	-0.0932246	201.39	-0.09071643
201.59	1.064897	201.59	0.990496	201.59	1.042977	201.59	1.062543	201.59	1.005469	201.59	1.0659	201.59	1.105021	201.59	-0.07963444	201.59	-0.1522917	201.59	-0.1135732	201.59	-0.1365611	201.59	-0.09656107	201.59	-0.1329178	201.59	-0.09581326	201.59	-0.09277052	201.59	-0.09296004
201.79	1.067888	201.79	0.9926236	201.79	1.043839	201.79	1.06797	201.79	1.006351	201.79	1.065568	201.79	1.109664	201.79	-0.07554518	201.79	-0.1529985	201.79	-0.1125757	201.79	-0.1322941	201.79	-0.09349258	201.79	-0.1313721	201.79	-0.09587728	201.79	-0.09700598	201.79	-0.09521741
201.99	1.067121	201.99	0.9977672	201.99	1.044784	201.99	1.062999	201.99	1.003095	201.99	1.06836	201.99	1.105987	201.99	-0.07620748	201.99	-0.1513983	201.99	-0.1088763	201.99	-0.1306733	201.99	-0.0963172	201.99	-0.1374484	201.99	-0.09665634	201.99	-0.09280412	201.99	-0.08862333
202.19	1.07168	202.19	0.9924594	202.19	1.047695	202.19	1.064545	202.19	1.003988	202.19	1.068706	202.19	1.104756	202.19	-0.07767572	202.19	-0.1574997	202.19	-0.1122541	202.19	-0.1322846	202.19	-0.09192155	202.19	-0.1303272	202.19	-0.09464656	202.19	-0.09375258	202.19	-0.08934046
202.39	1.074188	202.39	1.004453	202.39	1.045119	202.39	1.067113	202.39	1.00312	202.39	1.071052	202.39	1.104671	202.39	-0.07398933	202.39	-0.1599121	202.39	-0.1074016	202.39	-0.1325095	202.39	-0.09176713	202.39	-0.1333255	202.39	-0.09715679	202.39	-0.09919316	202.39	-0.09135833
202.59	1.074428	202.59	1.001836	202.59	1.049301	202.59	1.068179	202.59	1.007997	202.59	1.069662	202.59	1.110341	202.59	-0.07691936	202.59	-0.1483576	202.59	-0.1099342	202.59	-0.1364771	202.59	-0.09618162	202.59	-0.1318564	202.59	-0.09430404	202.59	-0.09726439	202.59	-0.08689401
202.79	1.078746	202.79	1.00644	202.79	1.053349	202.79	1.069362	202.79	1.011983	202.79	1.0694	202.79	1.106285	202.79	-0.07854762	202.79	-0.1491716	202.79	-0.1080936	202.79	-0.1361367	202.79	-0.09484079	202.79	-0.1325494	202.79	-0.09775193	202.79	-0.09295388	202.79	-0.0905834
202.99	1.08097	202.99	1.003018	202.99	1.051355	202.99	1.069165	202.99	1.006508	202.99	1.069085	202.99	1.106441	202.99	-0.0768851	202.99	-0.1479426	202.99	-0.1092518	202.99	-0.1325429	202.99	-0.09466795	202.99	-0.1344335	202.99	-0.09458736	202.99	-0.09002783	202.99	-0.08714383
203.19	1.083022	203.19	1.0037	203.19	1.051733	203.19	1.074645	203.19	1.009879	203.19	1.075281	203.19	1.108441	203.19	-0.07341705	203.19	-0.1546127	203.19	-0.1066234	203.19	-0.1349133	203.19	-0.09099359	203.19	-0.1275892	203.19	-0.09179777	203.19	-0.09114895	203.19	-0.09351698
203.39	1.088295	203.39	1.014123	203.39	1.055006	203.39	1.074184	203.39	1.006827	203.39	1.067363	203.39	1.109734	203.39	-0.07532681	203.39	-0.1468164	203.39	-0.1075231	203.39	-0.1317048	203.39	-0.09305073	203.39	-0.1309209	203.39	-0.09277246	203.39	-0.09341265	203.39	-0.0864864
203.59	1.09604	203.59	1.007116	203.59	1.054775	203.59	1.073366	203.59	1.016057	203.59	1.072293	203.59	1.10661	203.59	-0.0732638	203.59	-0.1514677	203.59	-0.1113707	203.59	-0.1338239	203.59	-0.09013126	203.59	-0.1285013	203.59	-0.09136259	203.59	-0.09255775	203.59	-0.0917964
203.79	1.087045	203.79	1.012945	203.79	1.056915	203.79	1.073697	203.79	1.007697	203.79	1.074401	203.79	1.11202	203.79	-0.07166394	203.79	-0.1513255	203.79	-0.107619	203.79	-0.1334653	203.79	-0.09272511	203.79	-0.1331904	203.79	-0.09103864	203.79	-0.08920904	203.79	-0.08269617
204	1.090653	204	1.013736	204	1.056818	204	1.075296	204	1.01088	204	1.073665	204	1.109336	204	-0.07352506	203.99	-0.1498858	203.99	-0.1098367	203.99	-0.1329801	203.99	-0.08910955	203.99	-0.1297618	203.99	-0.09356001	203.99	-0.09186383	203.99	-0.08694146
204.19	1.091936	204.19	1.014581	204.19	1.059419	204.19	1.073308	204.19	1.012411	204.19	1.075937	204.19	1.106544	204.19	-0.07696757	204.19	-0.1490252	204.19	-0.1105062	204.19	-0.1348879	204.19	-0.09092932	204.19	-0.130099	204.19	-0.09230175	204.19	-0.09102134	204.19	-0.08892736
204.39	1.096639	204.39	1.013754	204.39	1.057277	204.39	1.072199	204.39	1.012091	204.39	1.0716	204.39	1.106268	204.39	-0.07907426	204.39	-0.1457918	204.39	-0.1042486	204.39	-0.1315255	204.39	-0.09380548	204.39	-0.1315573	204.39	-0.09301982	204.39	-0.09288249	204.39	-0.08393666
204.59	1.097499	204.59	1.013757	204.59	1.057935	204.59	1.074755	204.59	1.014334	204.59	1.07224	204.59	1.109503	204.59	-0.07528554	204.59	-0.15141	204.59	-0.106813	204.59	-0.1293492	204.59	-0.09319838	204.59	-0.1290315	204.59	-0.09020264	204.59	-0.08897339	204.59	-0.08619909
204.79	1.102801	204.79	1.022522	204.79	1.059889	204.79	1.076938	204.79	1.011993	204.79	1.07725	204.79	1.111876	204.79	-0.07252002	204.79	-0.1521415	204.79	-0.105041	204.79	-0.129894	204.79	-0.087773	204.79	-0.1346161	204.79	-0.09460986	204.79	-0.09247629	204.79	-0.08537627
204.99	1.098606	204.99	1.01585	204.99	1.061336	204.99	1.077001	204.99	1.014133	204.99	1.074763	204.99	1.108405	204.99	-0.06994342	204.99	-0.1523624	204.99	-0.1083021	204.99	-0.126671	204.99	-0.09387174	204.99	-0.1279635	204.99	-0.09271234	204.99	-0.08916038	204.99	-0.09084085
205.19	1.102121	205.19	1.022303	205.19	1.058738	205.19	1.077953	205.19	1.011363	205.19	1.07226	205.19	1.111571	205.19	-0.07457186	205.19	-0.1475116	205.19	-0.1101877	205.19	-0.1297908	205.19	-0.09554607	205.19	-0.1272246	205.19	-0.08748701	205.19	-0.09172183	205.19	-0.08473787
205.39	1.106581	205.39	1.01845	205.39	1.063156	205.39	1.078437	205.39	1.011338	205.39	1.07543	205.39	1.114173	205.39	-0.07146429	205.39	-0.1508699	205.39	-0.1088349	205.39	-0.1364598	205.39	-0.0892012	205.39	-0.126788	205.39	-0.09250002	205.39	-0.08926195	205.39	-0.08548988
205.59	1.111729	205.59	1.023867	205.59	1.061005	205.59	1.074715	205.59	1.01379	205.59	1.074444	205.59	1.107117	205.59	-0.07543666	205.59	-0.1435765	205.59	-0.1080447	205.59	-0.1280608	205.59	-0.09246258	205.59	-0.1297837	205.59	-0.09108294	205.59	-0.0889139	205.59	-0.08549972
205.79	1.110116	205.79	1.024475	205.79	1.066285	205.79	1.08111	205.79	1.014071	205.79	1.077331	205.79	1.110164	205.79	-0.07295606	205.79	-0.1498567	205.79	-0.1048247	205.79	-0.1288051	205.79	-0.09108313	205.79	-0.1263274	205.79	-0.0885193	205.79	-0.0925405	205.79	-0.08864624
205.99	1.109287	205.99	1.026445	205.99	1.064874	205.99	1.078633	205.99	1.01504	205.99	1.077812	205.99	1.112462	205.99	-0.07038752	205.99	-0.1451394	205.99	-0.108067	205.99	-0.1279197	205.99	-0.0889317	205.99	-0.1246097	205.99	-0.08978932	205.99	-0.08955578	205.99	-0.09224346
206.19	1.11237	206.19	1.025035	206.19	1.072625	206.19	1.081523	206.19	1.014598	206.19	1.080616	206.19	1.109447	206.19	-0.07320517	206.19	-0.1494651	206.19	-0.108923	206.19	-0.1295572	206.19	-0.09252352	206.19	-0.1288715	206.19	-0.0863084	206.19	-0.08677343	206.19	-0.0890774
206.39	1.113609	206.39	1.019745	206.39	1.064638	206.39	1.079534	206.39	1.012481	206.39	1.073685	206.39	1.109455	206.39	-0.07016832	206.39	-0.1435428	206.39	-0.1089583	206.39	-0.1329905	206.39	-0.08700079	206.39	-0.1292328	206.39	-0.08914512	206.39	-0.08987633	206.39	-0.08540027
206.59	1.115712	206.59	1.027244	206.59	1.064521	206.59	1.077556	206.59	1.017217	206.59	1.077197	206.59	1.114939	206.59	-0.07472525	206.59	-0.1477405	206.59	-0.1057401	206.59	-0.1309139	206.59	-0.09287717	206.59	-0.1272893	206.59	-0.09151103	206.59	-0.0917364	206.59	-0.08950736
206.79	1.11694	206.79	1.025468	206.79	1.064119	206.79	1.082221	206.79	1.013303	206.79	1.072881	206.79	1.11148	206.79	-0.07183187	206.79	-0.1457628	206.79	-0.105476	206.79	-0.1295117	206.79	-0.09341287	206.79	-0.122627	206.79	-0.08633225	206.79	-0.09418736	206.79	-0.08484209
206.99	1.122494	206.99	1.0353	206.99	1.072937	206.99	1.083963	206.99	1.020436	206.99	1.078701	206.99	1.113985	206.99	-0.06695365	206.99	-0.1453868	206.99	-0.1117257	206.99	-0.1317553	206.99	-0.09229789	206.99	-0.1282076	206.99	-0.09084108	206.99	-0.08653733	206.99	-0.08235135
207.19	1.117252	207.19	1.029369	207.19	1.064216	207.19	1.08476	207.19	1.018225	207.19	1.072854	207.19	1.111526	207.19	-0.06991237	207.19	-0.145763	207.19	-0.1026192	207.19	-0.1331395	207.19	-0.09174477	207.19	-0.1257024	207.19	-0.08885006	207.19	-0.08828432	207.19	-0.08559296
207.39	1.12411	207.39	1.031891	207.39	1.070116	207.39	1.083963	207.39	1.018013	207.39	1.073807	207.39	1.113079	207.39	-0.07411689	207.39	-0.1444211	207.39	-0.09774208	207.39	-0.1257978	207.39	-0.0922883	207.39	-0.1283322	207.39	-0.09041857	207.39	-0.08474803	207.39	-0.08475688
207.59	1.124254	207.59	1.028582	207.59	1.066832	207.59	1.077327	207.59	1.014005	207.59	1.074041	207.59	1.115523	207.59	-0.07233839	207.59	-0.1413939	207.59	-0.103357	207.59	-0.130469	207.59	-0.09282404	207.59	-0.1301328	207.59	-0.09336311	207.59	-0.08678695	207.59	-0.08560142
207.79	1.119331	207.79	1.030463	207.79	1.064096	207.79	1.082505	207.79	1.016682	207.79	1.080607	207.79	1.112162	207.79	-0.07461361	207.79	-0.1461828	207.79	-0.1005339	207.79	-0.1329805	207.79	-0.09025601	207.79	-0.1234672	207.79	-0.09022801	207.79	-0.09235692	207.79	-0.0834488
207.99	1.124345	207.99	1.035184	207.99	1.07578	207.99	1.081854	207.99	1.017252	207.99	1.081016	207.99	1.114272	207.99	-0.07368506	207.99	-0.1392713	207.99	-0.1046169	207.99	-0.1294278	207.99	-0.08637743	207.99	-0.1286275	207.99	-0.08651716	207.99	-0.08673421	207.99	-0.08120851
208.2	1.125128	208.2	1.03985	208.2	1.070644	208.2	1.087133	208.2	1.013389	208.2	1.080853	208.2	1.113612	208.2	-0.07153467	208.19	-0.1458488	208.19	-0.1005951	208.19	-0.1266618	208.19	-0.08853053	208.19	-0.128174	208.19	-0.09258565	208.19	-0.08471368	208.19	-0.08406137
208.39	1.121875	208.39	1.031969	208.39	1.071721	208.39	1.087572	208.39	1.015514	208.39	1.077476	208.39	1.111068	208.39	-0.06807766	208.39	-0.1445449	208.39	-0.1043432	208.39	-0.1288108	208.39	-0.08908418	208.39	-0.1250284	208.39	-0.08725233	208.39	-0.09107526	208.39	-0.08428588
208.59	1.123995	208.59	1.038139	208.59	1.071394	208.59	1.087612	208.59	1.016869	208.59	1.07855	208.59	1.113527	208.59	-0.07198108	208.59	-0.1451218	208.59	-0.1031761	208.59	-0.1297849	208.59	-0.08753166	208.59	-0.1222045	208.59	-0.09046276	208.59	-0.08698717	208.59	-0.08573271
208.79	1.12912	208.79	1.037608	208.79	1.070675	208.79	1.084741	208.79	1.019124	208.79	1.07891	208.79	1.118229	208.79	-0.07152972	208.79	-0.1464855	208.79	-0.1053786	208.79	-0.1280105	208.79	-0.09034668	208.79	-0.1288476	208.79	-0.08889066	208.79	-0.08632978	208.79	-0.07912907
208.99	1.130463	208.99	1.040949	208.99	1.07469	208.99	1.087577	208.99	1.016278	208.99	1.07673	208.99	1.113977	208.99	-0.06924935	208.99	-0.1422386	208.99	-0.1046188	208.99	-0.1244012	208.99	-0.08951244	208.99	-0.1258414	208.99	-0.08850214	208.99	-0.0878829	208.99	-0.085455
209.19	1.127975	209.19	1.040549	209.19	1.072981	209.19	1.082914	209.19	1.015233	209.19	1.078273	209.19	1.113616	209.19	-0.07454196	209.19	-0.1459799	209.19	-0.1060223	209.19	-0.1266795	209.19	-0.09330079	209.19	-0.1256148	209.19	-0.08619981	209.19	-0.08531208	209.19	-0.08691681
209.39	1.130805	209.39	1.034958	209.39	1.077719	209.39	1.087852	209.39	1.019255	209.39	1.079258	209.39	1.117048	209.39	-0.06661499	209.39	-0.146382	209.39	-0.1033294	209.39	-0.1244245	209.39	-0.08802238	209.39	-0.1281182	209.39	-0.08590883	209.39	-0.08770552	209.39	-0.08669113
209.59	1.130954	209.59	1.040755	209.59	1.079011	209.59	1.083917	209.59	1.019792	209.59	1.078108	209.59	1.117621	209.59	-0.06964857	209.59	-0.1456147	209.59	-0.1035213	209.59	-0.1235661	209.59	-0.08633249	209.59	-0.1264678	209.59	-0.08768	209.59	-0.08855097	209.59	-0.08332725
209.79	1.130447	209.79	1.041146	209.79	1.07742	209.79	1.086658	209.79	1.021101	209.79	1.08055	209.79	1.114908	209.79	-0.06789397	209.79	-0.1435761	209.79	-0.1029359	209.79	-0.1249062	209.79	-0.09054766	209.79	-0.1254385	209.79	-0.08535813	209.79	-0.08805516	209.79	-0.0842604
209.99	1.134406	209.99	1.041977	209.99	1.075805	209.99	1.090021	209.99	1.018551	209.99	1.07963	209.99	1.122361	209.99	-0.06687155	209.99	-0.1416045	209.99	-0.103925	209.99	-0.126446	209.99	-0.08784685	209.99	-0.1279426	209.99	-0.08488888	209.99	-0.08787836	209.99	-0.08559896
210.19	1.134952	210.19	1.032177	210.19	1.077962	210.19	1.09147	210.19	1.023177	210.19	1.081207	210.19	1.117912	210.19	-0.06982761	210.19	-0.1456549	210.19	-0.1008365	210.19	-0.1264262	210.19	-0.08578543	210.19	-0.1204423	210.19	-0.08704422	210.19	-0.08675374	210.19	-0.08477419
210.39	1.129348	210.39	1.043253	210.39	1.075163	210.39	1.08851	210.39	1.017964	210.39	1.077272	210.39	1.112214	210.39	-0.07527018	210.39	-0.1404153	210.39	-0.1022419	210.39	-0.1262376	210.39	-0.08809731	210.39	-0.1257611	210.39	-0.08665594	210.39	-0.08308734	210.39	-0.08743741
210.59	1.133098	210.59	1.041105	210.59	1.077547	210.59	1.088927	210.59	1.020007	210.59	1.084484	210.59	1.115178	210.59	-0.06937633	210.59	-0.1364001	210.59	-0.1016207	210.59	-0.1239871	210.59	-0.08593915	210.59	-0.1256476	210.59	-0.08755327	210.59	-0.08647733	210.59	-0.08536434
210.8	1.139737	210.8	1.044993	210.8	1.077289	210.8	1.082429	210.8	1.020087	210.8	1.081879	210.8	1.118648	210.8	-0.07287131	210.79	-0.1412175	210.79	-0.1016915	210.79	-0.1301322	210.79	-0.08742389	210.79	-0.1235522	210.79	-0.08217771	210.79	-0.08668363	210.79	-0.08398014
210.99	1.134814	210.99	1.043939	210.99	1.079985	210.99	1.092993	210.99	1.021089	210.99	1.07663	210.99	1.118462	210.99	-0.06979173	210.99	-0.1407112	210.99	-0.1065881	210.99	-0.1220094	210.99	-0.08668456	210.99	-0.1234389	210.99	-0.08586808	210.99	-0.08667857	210.99	-0.08345606
211.19	1.136191	211.19	1.045686	211.19	1.08328	211.19	1.08683	211.19	1.021716	211.19	1.083283	211.19	1.119287	211.19	-0.06932914	211.19	-0.1453547	211.19	-0.1035618	211.19	-0.1271582	211.19	-0.08662227	211.19	-0.1256799	211.19	-0.08645338	211.19	-0.08206502	211.19	-0.0795633
211.39	1.139988	211.39	1.047867	211.39	1.076787	211.39	1.088541	211.39	1.020898	211.39	1.081768	211.39	1.115553	211.39	-0.06984403	211.39	-0.139724	211.39	-0.1026577	211.39	-0.1269265	211.39	-0.09006906	211.39	-0.1222432	211.39	-0.08487468	211.39	-0.08713902	211.39	-0.08696662
211.59	1.134715	211.59	1.044469	211.59	1.07908	211.59	1.09576	211.59	1.020751	211.59	1.086355	211.59	1.117682	211.59	-0.07123635	211.59	-0.1447997	211.59	-0.1011621	211.59	-0.1283112	211.59	-0.09137935	211.59	-0.1227871	211.59	-0.08668319	211.59	-0.08795072	211.59	-0.08462676
211.79	1.140882	211.79	1.043365	211.79	1.083184	211.79	1.092522	211.79	1.017533	211.79	1.082466	211.79	1.125113	211.79	-0.06798881	211.79	-0.1402746	211.79	-0.103867	211.79	-0.1220465	211.79	-0.09011294	211.79	-0.1204206	211.79	-0.08514103	211.79	-0.08464029	211.79	-0.08058763
211.99	1.137928	211.99	1.048116	211.99	1.078722	211.99	1.09523	211.99	1.023381	211.99	1.082654	211.99	1.118658	211.99	-0.06936213	211.99	-0.1392731	211.99	-0.1023917	211.99	-0.127065	211.99	-0.0885919	211.99	-0.1266647	211.99	-0.08319695	211.99	-0.08664702	211.99	-0.08630622
212.19	1.14352	212.19	1.049886	212.19	1.081451	212.19	1.091318	212.19	1.0262	212.19	1.084775	212.19	1.115568	212.19	-0.06619408	212.19	-0.1421286	212.19	-0.1061158	212.19	-0.1283015	212.19	-0.08629528	212.19	-0.1212305	212.19	-0.0891104	212.19	-0.0847384	212.19	-0.08055941
212.39	1.14335	212.39	1.046333	212.39	1.082597	212.39	1.095603	212.39	1.027019	212.39	1.089075	212.39	1.116733	212.39	-0.06808762	212.39	-0.1401092	212.39	-0.100214	212.39	-0.1248251	212.39	-0.08516259	212.39	-0.1205295	212.39	-0.08765856	212.39	-0.08305332	212.39	-0.08352503
212.59	1.138651	212.59	1.048497	212.59	1.084536	212.59	1.091187	212.59	1.028481	212.59	1.082588	212.59	1.120611	212.59	-0.06996081	212.59	-0.1398992	212.59	-0.102843	212.59	-0.1231081	212.59	-0.08162674	212.59	-0.1209275	212.59	-0.08286677	212.59	-0.08538021	212.59	-0.0850829
212.79	1.140907	212.79	1.050751	212.79	1.084479	212.79	1.096541	212.79	1.022723	212.79	1.083569	212.79	1.119631	212.79	-0.06943255	212.79	-0.1409993	212.79	-0.1045072	212.79	-0.1235493	212.79	-0.09110815	212.79	-0.1281185	212.79	-0.08705256	212.79	-0.08388302	212.79	-0.08054384
212.99	1.141657	212.99	1.053093	212.99	1.083381	212.99	1.092733	212.99	1.019597	212.99	1.077987	212.99	1.115158	212.99	-0.06892027	212.99	-0.1376981	212.99	-0.1017747	212.99	-0.1273552	212.99	-0.08633833	212.99	-0.1282452	212.99	-0.08921863	212.99	-0.08438493	212.99	-0.07553524
213.19	1.140521	213.19	1.051921	213.19	1.083953	213.19	1.093754	213.19	1.018411	213.19	1.084093	213.19	1.116416	213.19	-0.06654214	213.19	-0.1413659	213.19	-0.1011579	213.19	-0.1259861	213.19	-0.08494981	213.19	-0.1212851	213.19	-0.08542153	213.19	-0.08578772	213.19	-0.08107663
213.39	1.141295	213.39	1.05327	213.39	1.082848	213.39	1.097422	213.39	1.021846	213.39	1.082053	213.39	1.114523	213.39	-0.06692658	213.39	-0.1397288	213.39	-0.09970242	213.39	-0.1184953	213.39	-0.08522511	213.39	-0.1228862	213.39	-0.08524128	213.39	-0.0877528	213.39	-0.08349749
213.59	1.147324	213.59	1.052007	213.59	1.086092	213.59	1.092849	213.59	1.02496	213.59	1.085541	213.59	1.121128	213.59	-0.06982605	213.59	-0.1423759	213.59	-0.1008075	213.59	-0.1262537	213.59	-0.08440294	213.59	-0.1209873	213.59	-0.08219343	213.59	-0.08253723	213.59	-0.08076566
213.79	1.14892	213.79	1.056616	213.79	1.086683	213.79	1.09578	213.79	1.027389	213.79	1.082154	213.79	1.113359	213.79	-0.06722803	213.79	-0.1411314	213.79	-0.1043394	213.79	-0.1269122	213.79	-0.08026765	213.79	-0.123587	213.79	-0.08552214	213.79	-0.08305426	213.79	-0.08522047
213.99	1.144342	213.99	1.051562	213.99	1.086609	213.99	1.091868	213.99	1.025735	213.99	1.084643	213.99	1.117009	213.99	-0.07322831	213.99	-0.1374073	213.99	-0.09908462	213.99	-0.1255628	213.99	-0.08663136	213.99	-0.1235294	213.99	-0.07903927	213.99	-0.08134876	213.99	-0.08158812
214.19	1.14706	214.19	1.052406	214.19	1.084762	214.19	1.095766	214.19	1.027485	214.19	1.08794	214.19	1.119496	214.19	-0.07063429	214.19	-0.1386526	214.19	-0.1015216	214.19	-0.1252626	214.19	-0.08393694	214.19	-0.1210815	214.19	-0.08738137	214.19	-0.08567812	214.19	-0.08246657
214.39	1.146516	214.39	1.055329	214.39	1.08759	214.39	1.095014	214.39	1.026967	214.39	1.089264	214.39	1.121434	214.39	-0.06723721	214.39	-0.1399199	214.39	-0.0961124	214.39	-0.1253994	214.39	-0.08053491	214.39	-0.11871	214.39	-0.08708995	214.39	-0.08078263	214.39	-0.08271443
214.59	1.148858	214.59	1.054104	214.59	1.084329	214.59	1.098762	214.59	1.025987	214.59	1.088587	214.59	1.122012	214.59	-0.0658832	214.59	-0.1315651	214.59	-0.1010737	214.59	-0.125282	214.59	-0.08372736	214.59	-0.1216044	214.59	-0.08425276	214.59	-0.08784416	214.59	-0.0847317
214.79	1.151029	214.79	1.057433	214.79	1.090185	214.79	1.097816	214.79	1.02206	214.79	1.086015	214.79	1.121706	214.79	-0.06644356	214.79	-0.1387971	214.79	-0.0968364	214.79	-0.1259147	214.79	-0.08820031	214.79	-0.1249883	214.79	-0.0896687	214.79	-0.0862745	214.79	-0.08336213
214.99	1.147673	214.99	1.05559	214.99	1.089315	214.99	1.100767	214.99	1.026903	214.99	1.08582	214.99	1.119202	214.99	-0.06815346	214.99	-0.1396397	214.99	-0.1005841	214.99	-0.1225916	214.99	-0.08334431	214.99	-0.1225473	214.99	-0.08750661	214.99	-0.085489	214.99	-0.07863837
215.19	1.144662	215.19	1.054745	215.19	1.090364	215.19	1.095472	215.19	1.024243	215.19	1.090204	215.19	1.123454	215.19	-0.06920473	215.19	-0.1400017	215.19	-0.1006676	215.19	-0.1215934	215.19	-0.08481088	215.19	-0.120188	215.19	-0.08435752	215.19	-0.08360276	215.19	-0.0832293
215.39	1.151311	215.39	1.055435	215.39	1.092542	215.39	1.098318	215.39	1.029298	215.39	1.089426	215.39	1.123382	215.39	-0.06818836	215.39	-0.1425576	215.39	-0.09932479	215.39	-0.1244829	215.39	-0.08630372	215.39	-0.1269305	215.39	-0.08337907	215.39	-0.08356539	215.39	-0.08171049
215.59	1.151444	215.59	1.059393	215.59	1.08716	215.59	1.106607	215.59	1.031575	215.59	1.089334	215.59	1.117731	215.59	-0.06713624	215.59	-0.1394608	215.59	-0.09714033	215.59	-0.1240436	215.59	-0.08387025	215.59	-0.1221242	215.59	-0.08477992	215.59	-0.08746811	215.59	-0.08064884
215.79	1.149935	215.79	1.05762	215.79	1.093378	215.79	1.099423	215.79	1.027134	215.79	1.089261	215.79	1.122176	215.79	-0.06520634	215.79	-0.1397993	215.79	-0.1017082	215.79	-0.1252149	215.79	-0.08668113	215.79	-0.1249668	215.79	-0.08545861	215.79	-0.08157268	215.79	-0.08316336
215.99	1.151692	215.99	1.054858	215.99	1.090456	215.99	1.096861	215.99	1.033776	215.99	1.087676	215.99	1.117499	215.99	-0.06569611	215.99	-0.1394003	215.99	-0.09802984	215.99	-0.1236495	215.99	-0.08489115	215.99	-0.1247141	215.99	-0.08685243	215.99	-0.08383103	215.99	-0.08247384
216.19	1.149389	216.19	1.057685	216.19	1.093032	216.19	1.097032	216.19	1.030376	216.19	1.084079	216.19	1.122712	216.19	-0.06555337	216.19	-0.1371467	216.19	-0.09556764	216.19	-0.1219483	216.19	-0.0858674	216.19	-0.1199642	216.19	-0.07810615	216.19	-0.08588669	216.19	-0.08041088
216.39	1.147938	216.39	1.05988	216.39	1.091251	216.39	1.09915	216.39	1.02926	216.39	1.087438	216.39	1.119318	216.39	-0.06762013	216.39	-0.136956	216.39	-0.09882811	216.39	-0.1224982	216.39	-0.08373325	216.39	-0.1245325	216.39	-0.07958433	216.39	-0.08284313	216.39	-0.07738154
216.59	1.153824	216.59	1.056954	216.59	1.087909	216.59	1.097345	216.59	1.030714	216.59	1.084436	216.59	1.119395	216.59	-0.06751488	216.59	-0.1375259	216.59	-0.1010957	216.59	-0.1197166	216.59	-0.08226026	216.59	-0.1223916	216.59	-0.08327735	216.59	-0.08091814	216.59	-0.07746542
216.79	1.153355	216.79	1.060745	216.79	1.092819	216.79	1.09686	216.79	1.029471	216.79	1.085837	216.79	1.122678	216.79	-0.06417637	216.79	-0.1426951	216.79	-0.09542554	216.79	-0.1229031	216.79	-0.08197702	216.79	-0.1269653	216.79	-0.08212694	216.79	-0.08555826	216.79	-0.07973003
216.99	1.155614	216.99	1.057202	216.99	1.09183	216.99	1.102161	216.99	1.029144	216.99	1.083973	216.99	1.121549	216.99	-0.06846046	216.99	-0.1355376	216.99	-0.1013664	216.99	-0.1255905	216.99	-0.08521087	216.99	-0.1237173	216.99	-0.08517777	216.99	-0.08354189	216.99	-0.07611375
217.19	1.154045	217.19	1.060897	217.19	1.090011	217.19	1.102259	217.19	1.026064	217.19	1.090436	217.19	1.12598	217.19	-0.06943064	217.19	-0.1352123	217.19	-0.1028655	217.19	-0.120244	217.19	-0.079459	217.19	-0.1210765	217.19	-0.08039081	217.19	-0.08215327	217.19	-0.07949495
217.39	1.154807	217.39	1.058564	217.39	1.096708	217.39	1.102103	217.39	1.033036	217.39	1.086459	217.39	1.126828	217.39	-0.07150943	217.39	-0.1364257	217.39	-0.09596276	217.39	-0.1213119	217.39	-0.0847608	217.39	-0.1241515	217.39	-0.0808305	217.39	-0.0838866	217.39	-0.07675903
217.59	1.155743	217.59	1.063167	217.59	1.094357	217.59	1.099525	217.59	1.027854	217.59	1.088526	217.59	1.123944	217.59	-0.07143907	217.59	-0.1435606	217.59	-0.09974967	217.59	-0.1230993	217.59	-0.08344667	217.59	-0.1187544	217.59	-0.07851147	217.59	-0.08134943	217.59	-0.07627221
217.79	1.159628	217.79	1.063906	217.79	1.094153	217.79	1.102135	217.79	1.032499	217.79	1.09272	217.79	1.122173	217.79	-0.0653144	217.79	-0.1374804	217.79	-0.09593661	217.79	-0.1216564	217.79	-0.07973428	217.79	-0.1178852	217.79	-0.08137324	217.79	-0.0875209	217.79	-0.08166663
217.99	1.162882	217.99	1.063577	217.99	1.092538	217.99	1.10061	217.99	1.033414	217.99	1.087782	217.99	1.119351	217.99	-0.06317258	217.99	-0.1323796	217.99	-0.09519641	217.99	-0.121063	217.99	-0.08165447	217.99	-0.1239638	217.99	-0.08512399	217.99	-0.08245249	217.99	-0.07780665
218.19	1.159084	218.19	1.066887	218.19	1.099321	218.19	1.099938	218.19	1.027576	218.19	1.087501	218.19	1.124504	218.19	-0.06625526	218.19	-0.1362085	218.19	-0.09510462	218.19	-0.1200971	218.19	-0.08351662	218.19	-0.1161526	218.19	-0.08004835	218.19	-0.07857202	218.19	-0.08162756
218.39	1.158212	218.39	1.061127	218.39	1.093912	218.39	1.100495	218.39	1.030802	218.39	1.091519	218.39	1.120269	218.39	-0.06638374	218.39	-0.1314235	218.39	-0.09743858	218.39	-0.1295877	218.39	-0.08423328	218.39	-0.1186944	218.39	-0.07944048	218.39	-0.08063737	218.39	-0.07710033
218.59	1.156201	218.59	1.065933	218.59	1.09734	218.59	1.101535	218.59	1.029244	218.59	1.089987	218.59	1.121566	218.59	-0.0689986	218.59	-0.1343376	218.59	-0.09743489	218.59	-0.1205845	218.59	-0.07574556	218.59	-0.1197294	218.59	-0.0840773	218.59	-0.08217677	218.59	-0.08049043
218.79	1.158482	218.79	1.066402	218.79	1.094495	218.79	1.104251	218.79	1.033631	218.79	1.092626	218.79	1.124416	218.79	-0.06945449	218.79	-0.1380322	218.79	-0.09810915	218.79	-0.120432	218.79	-0.08260139	218.79	-0.1217868	218.79	-0.07926407	218.79	-0.07854582	218.79	-0.07722534
218.99	1.158166	218.99	1.06274	218.99	1.092572	218.99	1.10755	218.99	1.031457	218.99	1.088058	218.99	1.120829	218.99	-0.06602527	218.99	-0.1396749	218.99	-0.09271692	218.99	-0.1237248	218.99	-0.08417844	218.99	-0.1201715	218.99	-0.08076905	218.99	-0.0814693	218.99	-0.08029415
219.19	1.154482	219.19	1.063665	219.19	1.099038	219.19	1.101767	219.19	1.033054	219.19	1.089227	219.19	1.119518	219.19	-0.06527015	219.19	-0.1363252	219.19	-0.09850628	219.19	-0.1209565	219.19	-0.08031749	219.19	-0.1206952	219.19	-0.08418654	219.19	-0.08241212	219.19	-0.0819295
219.39	1.157957	219.39	1.062197	219.39	1.099761	219.39	1.103108	219.39	1.03507	219.39	1.087595	219.39	1.125464	219.39	-0.06741132	219.39	-0.1313624	219.39	-0.09324961	219.39	-0.1224063	219.39	-0.07738184	219.39	-0.1191771	219.39	-0.07748939	219.39	-0.08097599	219.39	-0.082539
219.59	1.158722	219.59	1.066669	219.59	1.097463	219.59	1.105253	219.59	1.025967	219.59	1.090002	219.59	1.126253	219.59	-0.0621363	219.59	-0.1373868	219.59	-0.09673268	219.59	-0.1195622	219.59	-0.08119959	219.59	-0.1157697	219.59	-0.08047954	219.59	-0.08189803	219.59	-0.07425466
219.79	1.156291	219.79	1.068874	219.79	1.096422	219.79	1.107937	219.79	1.030468	219.79	1.091711	219.79	1.122517	219.79	-0.06438154	219.79	-0.132629	219.79	-0.09474745	219.79	-0.1243555	219.79	-0.07970563	219.79	-0.1189578	219.79	-0.08393971	219.79	-0.08087626	219.79	-0.07443477
219.99	1.162793	219.99	1.064378	219.99	1.105536	219.99	1.105356	219.99	1.031577	219.99	1.090857	219.99	1.124506	219.99	-0.06610108	219.99	-0.131247	219.99	-0.09531391	219.99	-0.1233402	219.99	-0.08434237	219.99	-0.1200896	219.99	-0.08294897	219.99	-0.08194654	219.99	-0.07184374
220.19	1.162361	220.19	1.066729	220.19	1.097136	220.19	1.104381	220.19	1.027454	220.19	1.087314	220.19	1.125283	220.19	-0.06757192	220.19	-0.1310979	220.19	-0.09640848	220.19	-0.1193483	220.19	-0.08312329	220.19	-0.1206054	220.19	-0.07806101	220.19	-0.07974903	220.19	-0.07453486
220.41	1.157792	220.41	1.068848	220.41	1.098357	220.41	1.103479	220.41	1.031463	220.41	1.094393	220.41	1.118699	220.41	-0.06048761	220.39	-0.1308733	220.39	-0.09520062	220.39	-0.1157463	220.39	-0.07866152	220.39	-0.1142637	220.39	-0.07835074	220.39	-0.08008297	220.39	-0.073516
220.59	1.163165	220.59	1.074058	220.59	1.100827	220.59	1.105657	220.59	1.031995	220.59	1.090293	220.59	1.123218	220.59	-0.06578759	220.59	-0.1358873	220.59	-0.09313323	220.59	-0.1190329	220.59	-0.08179647	220.59	-0.1221233	220.59	-0.08512866	220.59	-0.0841248	220.59	-0.07777961
220.79	1.164069	220.79	1.070921	220.79	1.101939	220.79	1.107753	220.79	1.02989	220.79	1.090222	220.79	1.126598	220.79	-0.06379341	220.79	-0.1341628	220.79	-0.09709354	220.79	-0.1208624	220.79	-0.08128414	220.79	-0.127333	220.79	-0.0787295	220.79	-0.08047333	220.79	-0.07895093
220.99	1.165294	220.99	1.064363	220.99	1.094954	220.99	1.107201	220.99	1.030931	220.99	1.094782	220.99	1.123647	220.99	-0.06121456	220.99	-0.1287587	220.99	-0.0984736	220.99	-0.1185616	220.99	-0.07938333	220.99	-0.1173526	220.99	-0.07612171	220.99	-0.07790728	220.99	-0.07778855
221.19	1.163227	221.19	1.067349	221.19	1.09719	221.19	1.107815	221.19	1.032395	221.19	1.090628	221.19	1.125175	221.19	-0.06485328	221.19	-0.1315952	221.19	-0.09383186	221.19	-0.1231682	221.19	-0.08465914	221.19	-0.1161489	221.19	-0.07971656	221.19	-0.07960058	221.19	-0.08258422
221.39	1.167104	221.39	1.067625	221.39	1.10038	221.39	1.109592	221.39	1.034244	221.39	1.090151	221.39	1.121335	221.39	-0.06417813	221.39	-0.1299973	221.39	-0.09507638	221.39	-0.1165438	221.39	-0.0774849	221.39	-0.1197837	221.39	-0.07806937	221.39	-0.08342386	221.39	-0.07488455
221.59	1.163052	221.59	1.070293	221.59	1.097111	221.59	1.106135	221.59	1.032676	221.59	1.090108	221.59	1.118753	221.59	-0.06256653	221.59	-0.1294585	221.59	-0.09399994	221.59	-0.1197381	221.59	-0.08564096	221.59	-0.1193103	221.59	-0.07813305	221.59	-0.08176021	221.59	-0.0795995
221.79	1.163216	221.79	1.067416	221.79	1.103133	221.79	1.106094	221.79	1.031589	221.79	1.094904	221.79	1.125265	221.79	-0.06020968	221.79	-0.1354379	221.79	-0.09723158	221.79	-0.1213787	221.79	-0.08289222	221.79	-0.1191801	221.79	-0.07812764	221.79	-0.0821555	221.79	-0.07503002
221.99	1.165377	221.99	1.075313	221.99	1.101303	221.99	1.110406	221.99	1.03337	221.99	1.093174	221.99	1.124955	221.99	-0.06314056	221.99	-0.1330408	221.99	-0.09585363	221.99	-0.1185221	221.99	-0.07885773	221.99	-0.113926	221.99	-0.07927825	221.99	-0.08124496	221.99	-0.07839542
222.19	1.164459	222.19	1.069399	222.19	1.104	222.19	1.114387	222.19	1.032645	222.19	1.092741	222.19	1.124093	222.19	-0.06351912	222.19	-0.1333535	222.19	-0.09405886	222.19	-0.1257114	222.19	-0.08134092	222.19	-0.1177665	222.19	-0.0790863	222.19	-0.07822694	222.19	-0.07789562
222.39	1.164091	222.39	1.069486	222.39	1.105926	222.39	1.109397	222.39	1.031359	222.39	1.092446	222.39	1.126648	222.39	-0.06403273	222.39	-0.1333968	222.39	-0.0917763	222.39	-0.1160756	222.39	-0.07735521	222.39	-0.1209781	222.39	-0.07631276	222.39	-0.07559911	222.39	-0.07623789
222.59	1.169533	222.59	1.074174	222.59	1.107144	222.59	1.109712	222.59	1.033641	222.59	1.093194	222.59	1.127789	222.59	-0.05976931	222.59	-0.1366658	222.59	-0.09274894	222.59	-0.1183294	222.59	-0.07942404	222.59	-0.1208175	222.59	-0.08188643	222.59	-0.07942457	222.59	-0.07730336
222.79	1.166051	222.79	1.068774	222.79	1.103456	222.79	1.107581	222.79	1.037915	222.79	1.094854	222.79	1.121979	222.79	-0.06019871	222.79	-0.1328007	222.79	-0.09706093	222.79	-0.1194687	222.79	-0.07693296	222.79	-0.1183494	222.79	-0.07873753	222.79	-0.07849966	222.79	-0.07790503
222.99	1.168885	222.99	1.072142	222.99	1.104995	222.99	1.109839	222.99	1.036339	222.99	1.0923	222.99	1.12839	222.99	-0.06067177	222.99	-0.1318553	222.99	-0.08828882	222.99	-0.1203169	222.99	-0.08339419	222.99	-0.1187761	222.99	-0.08250757	222.99	-0.0791931	222.99	-0.0728435
223.19	1.164821	223.19	1.073737	223.19	1.09857	223.19	1.110395	223.19	1.037805	223.19	1.098699	223.19	1.122533	223.19	-0.06141691	223.19	-0.1332548	223.19	-0.09315697	223.19	-0.1173769	223.19	-0.07633825	223.19	-0.116283	223.19	-0.08113823	223.19	-0.0834166	223.19	-0.07692869
223.39	1.169234	223.39	1.069937	223.39	1.103853	223.39	1.109369	223.39	1.03753	223.39	1.095109	223.39	1.121312	223.39	-0.06107285	223.39	-0.1339366	223.39	-0.09288169	223.39	-0.1187395	223.39	-0.07482847	223.39	-0.1182114	223.39	-0.08165062	223.39	-0.07890496	223.39	-0.07773901
223.59	1.176226	223.59	1.070118	223.59	1.109105	223.59	1.109509	223.59	1.02958	223.59	1.093771	223.59	1.127578	223.59	-0.06402411	223.59	-0.1294738	223.59	-0.09280711	223.59	-0.1178915	223.59	-0.07421387	223.59	-0.1201138	223.59	-0.08090457	223.59	-0.07813382	223.59	-0.07399204
223.79	1.168787	223.79	1.074446	223.79	1.107332	223.79	1.110337	223.79	1.034961	223.79	1.097433	223.79	1.122938	223.79	-0.06596295	223.79	-0.129831	223.79	-0.09120882	223.79	-0.1152153	223.79	-0.07784816	223.79	-0.121031	223.79	-0.083521	223.79	-0.081963	223.79	-0.08101191
223.99	1.170478	223.99	1.074625	223.99	1.108904	223.99	1.109526	223.99	1.036697	223.99	1.09696	223.99	1.125129	223.99	-0.06300237	223.99	-0.1322222	223.99	-0.09419083	223.99	-0.1137629	223.99	-0.07890511	223.99	-0.1184611	223.99	-0.08049302	223.99	-0.07422926	223.99	-0.07520693
224.19	1.170527	224.19	1.075183	224.19	1.109719	224.19	1.114531	224.19	1.038005	224.19	1.09412	224.19	1.128221	224.19	-0.06403815	224.19	-0.1330741	224.19	-0.09392308	224.19	-0.1203467	224.19	-0.07850889	224.19	-0.1196383	224.19	-0.08075435	224.19	-0.08298058	224.19	-0.07556693
224.39	1.168161	224.39	1.077894	224.39	1.104033	224.39	1.115578	224.39	1.037021	224.39	1.09489	224.39	1.12639	224.39	-0.05860128	224.39	-0.1325148	224.39	-0.09498095	224.39	-0.1198524	224.39	-0.07846375	224.39	-0.1193301	224.39	-0.08022249	224.39	-0.07851032	224.39	-0.07943571
224.59	1.174065	224.59	1.075387	224.59	1.105367	224.59	1.115083	224.59	1.039961	224.59	1.09142	224.59	1.128285	224.59	-0.06133038	224.59	-0.1274118	224.59	-0.09300825	224.59	-0.1169005	224.59	-0.08195785	224.59	-0.1160936	224.59	-0.07746439	224.59	-0.07656964	224.59	-0.07535516
224.79	1.172147	224.79	1.076286	224.79	1.108235	224.79	1.115519	224.79	1.035346	224.79	1.089756	224.79	1.136225	224.79	-0.06590479	224.79	-0.1363903	224.79	-0.09203044	224.79	-0.1207868	224.79	-0.08214126	224.79	-0.1157116	224.79	-0.07430232	224.79	-0.07788871	224.79	-0.07430328
224.99	1.174118	224.99	1.07643	224.99	1.105529	224.99	1.11206	224.99	1.038126	224.99	1.091962	224.99	1.130566	224.99	-0.05627284	224.99	-0.132788	224.99	-0.09557158	224.99	-0.1152051	224.99	-0.08158696	224.99	-0.1190618	224.99	-0.07876363	224.99	-0.07787341	224.99	-0.07318183
225.19	1.17208	225.19	1.074845	225.19	1.107211	225.19	1.113637	225.19	1.037865	225.19	1.09833	225.19	1.130034	225.19	-0.06207229	225.19	-0.1286733	225.19	-0.0920959	225.19	-0.1172754	225.19	-0.07853191	225.19	-0.1158095	225.19	-0.07864423	225.19	-0.07949982	225.19	-0.07564089
225.39	1.172683	225.39	1.073391	225.39	1.105132	225.39	1.109152	225.39	1.034569	225.39	1.094955	225.39	1.127618	225.39	-0.06098549	225.39	-0.1299106	225.39	-0.09501667	225.39	-0.1166716	225.39	-0.08081312	225.39	-0.1166983	225.39	-0.07709497	225.39	-0.07696994	225.39	-0.07658433
225.59	1.170261	225.59	1.075279	225.59	1.105293	225.59	1.11614	225.59	1.037676	225.59	1.097912	225.59	1.126734	225.59	-0.06115485	225.59	-0.129175	225.59	-0.09330525	225.59	-0.1155821	225.59	-0.07754373	225.59	-0.1143623	225.59	-0.07848874	225.59	-0.08072245	225.59	-0.07371356
225.79	1.172341	225.79	1.076079	225.79	1.108934	225.79	1.116517	225.79	1.036998	225.79	1.098381	225.79	1.131749	225.79	-0.06463843	225.79	-0.1310538	225.79	-0.08998309	225.79	-0.1207554	225.79	-0.07735316	225.79	-0.1174143	225.79	-0.07862908	225.79	-0.08107997	225.79	-0.07578303
225.99	1.178277	225.99	1.077761	225.99	1.105298	225.99	1.111478	225.99	1.033356	225.99	1.097219	225.99	1.12668	225.99	-0.0607389	225.99	-0.1284525	225.99	-0.09037744	225.99	-0.1191343	225.99	-0.07568398	225.99	-0.1137708	225.99	-0.07806983	225.99	-0.07781693	225.99	-0.07335061
226.19	1.173859	226.19	1.076814	226.19	1.109423	226.19	1.108862	226.19	1.039533	226.19	1.097494	226.19	1.130415	226.19	-0.05807251	226.19	-0.1325483	226.19	-0.09260171	226.19	-0.1188839	226.19	-0.07476535	226.19	-0.1170051	226.19	-0.07591015	226.19	-0.07770611	226.19	-0.07384928
226.39	1.175492	226.39	1.074092	226.39	1.10594	226.39	1.118589	226.39	1.039208	226.39	1.103083	226.39	1.126584	226.39	-0.05562512	226.39	-0.1317925	226.39	-0.09519867	226.39	-0.1173712	226.39	-0.07583798	226.39	-0.1143754	226.39	-0.07428272	226.39	-0.08085228	226.39	-0.06946594
226.59	1.177346	226.59	1.077738	226.59	1.11069	226.59	1.109602	226.59	1.034469	226.59	1.096876	226.59	1.127995	226.59	-0.06057862	226.59	-0.1270854	226.59	-0.09245627	226.59	-0.1158514	226.59	-0.07587739	226.59	-0.1079937	226.59	-0.07186371	226.59	-0.07618222	226.59	-0.0728629
226.79	1.171153	226.79	1.077429	226.79	1.109591	226.79	1.110194	226.79	1.03842	226.79	1.096091	226.79	1.132141	226.79	-0.06504352	226.79	-0.128231	226.79	-0.09279507	226.79	-0.1148827	226.79	-0.07334723	226.79	-0.1133855	226.79	-0.08230238	226.79	-0.0763444	226.79	-0.07502098
226.99	1.176096	226.99	1.077402	226.99	1.109017	226.99	1.112187	226.99	1.036901	226.99	1.097101	226.99	1.128058	226.99	-0.06084728	226.99	-0.1245648	226.99	-0.09202588	226.99	-0.1203792	226.99	-0.07531111	226.99	-0.1157764	226.99	-0.07301961	226.99	-0.08034385	226.99	-0.07555772
227.19	1.171079	227.19	1.07486	227.19	1.110785	227.19	1.11519	227.19	1.039581	227.19	1.092855	227.19	1.136372	227.19	-0.06139443	227.19	-0.1314914	227.19	-0.0944216	227.19	-0.1115512	227.19	-0.07836616	227.19	-0.1206919	227.19	-0.08699205	227.19	-0.07929803	227.19	-0.07068282
227.4	1.178327	227.4	1.081787	227.4	1.10649	227.4	1.118221	227.4	1.042193	227.4	1.096678	227.4	1.12848	227.4	-0.06117785	227.39	-0.1329706	227.39	-0.09163477	227.39	-0.1229838	227.39	-0.07808901	227.39	-0.1140829	227.39	-0.07158838	227.39	-0.08116756	227.39	-0.07310838
227.59	1.178372	227.59	1.078862	227.59	1.107878	227.59	1.118535	227.59	1.039157	227.59	1.095886	227.59	1.123372	227.59	-0.05795587	227.59	-0.1330471	227.59	-0.0867015	227.59	-0.1193183	227.59	-0.07428346	227.59	-0.1142406	227.59	-0.0808854	227.59	-0.07781515	227.59	-0.07625783
227.79	1.177295	227.79	1.078301	227.79	1.108341	227.79	1.115764	227.79	1.03669	227.79	1.096059	227.79	1.129363	227.79	-0.05598364	227.79	-0.131687	227.79	-0.08786399	227.79	-0.116351	227.79	-0.07566205	227.79	-0.1155482	227.79	-0.07678737	227.79	-0.08122319	227.79	-0.07143664
227.99	1.176238	227.99	1.086871	227.99	1.117586	227.99	1.118181	227.99	1.039165	227.99	1.100039	227.99	1.133803	227.99	-0.05906038	227.99	-0.1303546	227.99	-0.09564427	227.99	-0.1153206	227.99	-0.07526148	227.99	-0.1158272	227.99	-0.07447185	227.99	-0.07970447	227.99	-0.07166684
228.19	1.175036	228.19	1.080764	228.19	1.110796	228.19	1.118104	228.19	1.037575	228.19	1.100394	228.19	1.127154	228.19	-0.05854644	228.19	-0.1272795	228.19	-0.09152067	228.19	-0.1208599	228.19	-0.07822728	228.19	-0.114009	228.19	-0.07972973	228.19	-0.07513576	228.19	-0.07546178
228.4	1.177037	228.4	1.078161	228.4	1.110781	228.4	1.116312	228.4	1.039128	228.4	1.096157	228.4	1.127981	228.4	-0.05811339	228.39	-0.1240825	228.39	-0.08790136	228.39	-0.1156667	228.39	-0.07709119	228.39	-0.1156706	228.39	-0.07617713	228.39	-0.07826729	228.39	-0.071705
228.59	1.177106	228.59	1.077036	228.59	1.109395	228.59	1.121307	228.59	1.040229	228.59	1.097102	228.59	1.132443	228.59	-0.06151349	228.59	-0.1310381	228.59	-0.08864335	228.59	-0.1127186	228.59	-0.07797149	228.59	-0.1160247	228.59	-0.0730168	228.59	-0.08056138	228.59	-0.07414855
228.79	1.178308	228.79	1.080921	228.79	1.110803	228.79	1.119882	228.79	1.04178	228.79	1.096792	228.79	1.128123	228.79	-0.0577911	228.79	-0.1288244	228.79	-0.08933686	228.79	-0.1153171	228.79	-0.07572685	228.79	-0.1094745	228.79	-0.07782116	228.79	-0.08076433	228.79	-0.07462251
229	1.181085	229	1.078594	229	1.10974	229	1.114491	229	1.041323	229	1.099194	229	1.135821	229	-0.05890547	228.99	-0.1296096	228.99	-0.08416446	228.99	-0.1156075	228.99	-0.07626081	228.99	-0.1145032	228.99	-0.0733977	228.99	-0.0774546	228.99	-0.07895304
229.19	1.176772	229.19	1.082615	229.19	1.108472	229.19	1.116242	229.19	1.041656	229.19	1.102763	229.19	1.131981	229.19	-0.05948833	229.19	-0.1266183	229.19	-0.0937416	229.19	-0.1168195	229.19	-0.07665369	229.19	-0.1098645	229.19	-0.07903414	229.19	-0.07495337	229.19	-0.07163862
229.39	1.178401	229.39	1.08142	229.39	1.111536	229.39	1.117775	229.39	1.043696	229.39	1.100327	229.39	1.128223	229.39	-0.0583333	229.39	-0.1263364	229.39	-0.09068042	229.39	-0.1135287	229.39	-0.07354095	229.39	-0.1156546	229.39	-0.08107189	229.39	-0.07462059	229.39	-0.07384854
229.59	1.180714	229.59	1.079743	229.59	1.113265	229.59	1.120534	229.59	1.044143	229.59	1.100408	229.59	1.129038	229.59	-0.0595196	229.59	-0.1273452	229.59	-0.09088968	229.59	-0.1193181	229.59	-0.07553001	229.59	-0.1187427	229.59	-0.07540548	229.59	-0.077975	229.59	-0.0709977
229.79	1.182118	229.79	1.080609	229.79	1.115864	229.79	1.120913	229.79	1.039832	229.79	1.10347	229.79	1.132918	229.79	-0.05696208	229.79	-0.1264133	229.79	-0.09583678	229.79	-0.1129153	229.79	-0.07493914	229.79	-0.1163586	229.79	-0.07713096	229.79	-0.07769604	229.79	-0.07296783
229.99	1.181683	229.99	1.083459	229.99	1.113328	229.99	1.119599	229.99	1.04588	229.99	1.107016	229.99	1.128952	229.99	-0.06290608	229.99	-0.1253028	229.99	-0.08532552	229.99	-0.1089645	229.99	-0.07323853	229.99	-0.1180221	229.99	-0.07692631	229.99	-0.07756884	229.99	-0.07514701
230.19	1.179878	230.19	1.082576	230.19	1.109726	230.19	1.121682	230.19	1.040737	230.19	1.097338	230.19	1.137924	230.19	-0.06210852	230.19	-0.1250884	230.19	-0.08870383	230.19	-0.1128302	230.19	-0.07159302	230.19	-0.1118423	230.19	-0.07624561	230.19	-0.06997854	230.19	-0.0711932
230.39	1.179081	230.39	1.084347	230.39	1.111446	230.39	1.119258	230.39	1.042086	230.39	1.1058	230.39	1.129959	230.39	-0.05917327	230.39	-0.1255757	230.39	-0.08781567	230.39	-0.1170487	230.39	-0.07102674	230.39	-0.1144509	230.39	-0.07730406	230.39	-0.07561553	230.39	-0.07148596
230.59	1.182916	230.59	1.079487	230.59	1.111192	230.59	1.117212	230.59	1.037813	230.59	1.099004	230.59	1.136962	230.59	-0.0630924	230.59	-0.1240111	230.59	-0.09200504	230.59	-0.1135672	230.59	-0.07468532	230.59	-0.1154223	230.59	-0.07839096	230.59	-0.08085246	230.59	-0.0752248
230.79	1.182025	230.79	1.083761	230.79	1.114285	230.79	1.121287	230.79	1.040368	230.79	1.096603	230.79	1.130436	230.79	-0.05566474	230.79	-0.1243904	230.79	-0.08640746	230.79	-0.1142441	230.79	-0.07089675	230.79	-0.1117404	230.79	-0.07857878	230.79	-0.07610604	230.79	-0.07569296
230.99	1.183343	230.99	1.080663	230.99	1.115117	230.99	1.124141	230.99	1.040323	230.99	1.101259	230.99	1.132603	230.99	-0.0574654	230.99	-0.1225893	230.99	-0.08781945	230.99	-0.1151487	230.99	-0.07491291	230.99	-0.1141404	230.99	-0.07806194	230.99	-0.0805809	230.99	-0.07531959
231.19	1.180199	231.19	1.083553	231.19	1.112515	231.19	1.121243	231.19	1.038501	231.19	1.103086	231.19	1.129605	231.19	-0.05839841	231.19	-0.1252438	231.19	-0.08791508	231.19	-0.1135026	231.19	-0.07603878	231.19	-0.1178108	231.19	-0.07241772	231.19	-0.07823861	231.19	-0.07258181
231.39	1.175875	231.39	1.083315	231.39	1.116535	231.39	1.119307	231.39	1.041306	231.39	1.096145	231.39	1.132038	231.39	-0.05628474	231.39	-0.1301126	231.39	-0.08751975	231.39	-0.1125058	231.39	-0.07156127	231.39	-0.1141917	231.39	-0.07508162	231.39	-0.0746446	231.39	-0.07088587
231.6	1.184503	231.6	1.08225	231.6	1.112605	231.6	1.119606	231.6	1.045893	231.6	1.09675	231.6	1.128847	231.6	-0.05935803	231.59	-0.1266721	231.59	-0.08732799	231.59	-0.1133038	231.59	-0.06738904	231.59	-0.1140299	231.59	-0.07511385	231.59	-0.0788144	231.59	-0.07366509
231.8	1.182675	231.8	1.081818	231.8	1.118704	231.8	1.121625	231.8	1.044269	231.8	1.099871	231.8	1.137567	231.8	-0.06158673	231.79	-0.1267373	231.79	-0.0896553	231.79	-0.1182464	231.79	-0.07488804	231.79	-0.115743	231.79	-0.07687882	231.79	-0.07426888	231.79	-0.06947771
231.99	1.186573	231.99	1.088111	231.99	1.113693	231.99	1.122289	231.99	1.039768	231.99	1.097198	231.99	1.13215	231.99	-0.0605605	231.99	-0.1269023	231.99	-0.08666784	231.99	-0.1149911	231.99	-0.07323468	231.99	-0.1106921	231.99	-0.07506379	231.99	-0.07765982	231.99	-0.07002925
232.19	1.184728	232.19	1.084135	232.19	1.117065	232.19	1.120952	232.19	1.045585	232.19	1.09991	232.19	1.139087	232.19	-0.05832801	232.19	-0.1306451	232.19	-0.08481259	232.19	-0.1094385	232.19	-0.07559867	232.19	-0.1063704	232.19	-0.07841749	232.19	-0.07542	232.19	-0.07350073
232.39	1.182404	232.39	1.085068	232.39	1.118954	232.39	1.119562	232.39	1.041034	232.39	1.101351	232.39	1.134444	232.39	-0.05752108	232.39	-0.1259476	232.39	-0.08747475	232.39	-0.1139992	232.39	-0.0771312	232.39	-0.1172682	232.39	-0.07749591	232.39	-0.07185313	232.39	-0.07166959
232.59	1.182342	232.59	1.081706	232.59	1.121554	232.59	1.118924	232.59	1.041623	232.59	1.102098	232.59	1.134246	232.59	-0.05658435	232.59	-0.1308354	232.59	-0.08976439	232.59	-0.1118976	232.59	-0.07283963	232.59	-0.1120164	232.59	-0.07772534	232.59	-0.07865906	232.59	-0.0694169
232.79	1.189053	232.79	1.08041	232.79	1.116442	232.79	1.122493	232.79	1.048834	232.79	1.104962	232.79	1.133919	232.79	-0.05794807	232.79	-0.1261004	232.79	-0.08723011	232.79	-0.1141048	232.79	-0.07670163	232.79	-0.1085266	232.79	-0.07813688	232.79	-0.07614707	232.79	-0.07089225
232.99	1.18269	232.99	1.087876	232.99	1.111946	232.99	1.124576	232.99	1.042863	232.99	1.104859	232.99	1.136779	232.99	-0.05975097	232.99	-0.1237535	232.99	-0.08471979	232.99	-0.1099019	232.99	-0.07569606	232.99	-0.1147816	232.99	-0.07350253	232.99	-0.07278775	232.99	-0.07240807
233.19	1.185047	233.19	1.08574	233.19	1.116718	233.19	1.121396	233.19	1.039076	233.19	1.102262	233.19	1.135826	233.19	-0.05754973	233.19	-0.1200005	233.19	-0.09120026	233.19	-0.1150443	233.19	-0.07637978	233.19	-0.1141263	233.19	-0.07209308	233.19	-0.07373668	233.19	-0.07127591
233.39	1.186623	233.39	1.087052	233.39	1.116717	233.39	1.121339	233.39	1.043776	233.39	1.102216	233.39	1.137964	233.39	-0.0605367	233.39	-0.1263595	233.39	-0.09242136	233.39	-0.1136208	233.39	-0.08082107	233.39	-0.1122429	233.39	-0.07664827	233.39	-0.07500595	233.39	-0.07174314
233.59	1.182572	233.59	1.08209	233.59	1.116421	233.59	1.122776	233.59	1.044109	233.59	1.103141	233.59	1.136334	233.59	-0.0569264	233.59	-0.1292073	233.59	-0.09036364	233.59	-0.1145032	233.59	-0.07377204	233.59	-0.1138052	233.59	-0.07009985	233.59	-0.07432604	233.59	-0.06954717
233.79	1.186949	233.79	1.085241	233.79	1.114595	233.79	1.122113	233.79	1.044242	233.79	1.103728	233.79	1.13764	233.79	-0.05872284	233.79	-0.1274286	233.79	-0.08747272	233.79	-0.1163066	233.79	-0.06796215	233.79	-0.1100965	233.79	-0.07430163	233.79	-0.07038	233.79	-0.06861758
233.99	1.188711	233.99	1.090954	233.99	1.11641	233.99	1.119715	233.99	1.048	233.99	1.104258	233.99	1.136339	233.99	-0.05457547	233.99	-0.1250175	233.99	-0.08690064	233.99	-0.1127548	233.99	-0.0734495	233.99	-0.119477	233.99	-0.07407679	233.99	-0.07448247	233.99	-0.0685759
234.19	1.185808	234.19	1.088281	234.19	1.12107	234.19	1.128332	234.19	1.047678	234.19	1.103831	234.19	1.135451	234.19	-0.0558738	234.19	-0.124339	234.19	-0.0861485	234.19	-0.1143325	234.19	-0.07019253	234.19	-0.1112165	234.19	-0.07645667	234.19	-0.07423969	234.19	-0.07533394
234.39	1.183663	234.39	1.085974	234.39	1.122231	234.39	1.120207	234.39	1.04579	234.39	1.104712	234.39	1.136624	234.39	-0.05823009	234.39	-0.1249967	234.39	-0.08885266	234.39	-0.1128945	234.39	-0.07422347	234.39	-0.1152977	234.39	-0.07221097	234.39	-0.07514834	234.39	-0.07148834
234.59	1.185604	234.59	1.090938	234.59	1.116735	234.59	1.12164	234.59	1.049804	234.59	1.100005	234.59	1.137119	234.59	-0.05574238	234.59	-0.122154	234.59	-0.08528132	234.59	-0.1108578	234.59	-0.07351266	234.59	-0.115089	234.59	-0.07456286	234.59	-0.07379238	234.59	-0.07273535
234.79	1.184093	234.79	1.087111	234.79	1.117465	234.79	1.125428	234.79	1.043121	234.79	1.106452	234.79	1.135846	234.79	-0.05924635	234.79	-0.1244821	234.79	-0.08692954	234.79	-0.112609	234.79	-0.07179847	234.79	-0.1112827	234.79	-0.07673056	234.79	-0.07379549	234.79	-0.06583083
234.99	1.186909	234.99	1.087749	234.99	1.120559	234.99	1.128818	234.99	1.044409	234.99	1.102151	234.99	1.138481	234.99	-0.0523447	234.99	-0.1276518	234.99	-0.08802261	234.99	-0.1108746	234.99	-0.07301383	234.99	-0.111905	234.99	-0.07372007	234.99	-0.07748502	234.99	-0.07104256
235.19	1.187489	235.19	1.091943	235.19	1.118819	235.19	1.131128	235.19	1.044202	235.19	1.098871	235.19	1.142856	235.19	-0.05610932	235.19	-0.1271646	235.19	-0.08755983	235.19	-0.117075	235.19	-0.07597034	235.19	-0.1141163	235.19	-0.07220598	235.19	-0.06914226	235.19	-0.07143024
235.39	1.185343	235.39	1.090708	235.39	1.118257	235.39	1.126109	235.39	1.046786	235.39	1.100787	235.39	1.134594	235.39	-0.05152391	235.39	-0.1240748	235.39	-0.08605893	235.39	-0.1084638	235.39	-0.0737967	235.39	-0.1087181	235.39	-0.07068212	235.39	-0.0763559	235.39	-0.07006837
235.59	1.18874	235.59	1.092314	235.59	1.121109	235.59	1.126859	235.59	1.0449	235.59	1.101234	235.59	1.139714	235.59	-0.05899182	235.59	-0.1264986	235.59	-0.09037144	235.59	-0.1092385	235.59	-0.07397952	235.59	-0.1146137	235.59	-0.07714301	235.59	-0.07554554	235.59	-0.07138928
235.79	1.184199	235.79	1.08757	235.79	1.121724	235.79	1.128411	235.79	1.045715	235.79	1.097613	235.79	1.134353	235.79	-0.05394441	235.79	-0.1222887	235.79	-0.09010369	235.79	-0.1114749	235.79	-0.07620399	235.79	-0.1099501	235.79	-0.07545036	235.79	-0.0721851	235.79	-0.07316239
236	1.187725	236	1.091411	236	1.120833	236	1.12136	236	1.041512	236	1.105953	236	1.13536	236	-0.05690352	235.99	-0.1233107	235.99	-0.08461438	235.99	-0.1105912	235.99	-0.07617245	235.99	-0.1108223	235.99	-0.07219008	235.99	-0.0712808	235.99	-0.07104994
236.21	1.190888	236.21	1.092424	236.21	1.122063	236.21	1.125975	236.21	1.046356	236.21	1.106211	236.21	1.138022	236.21	-0.05843771	236.19	-0.1208032	236.19	-0.08795843	236.19	-0.1085123	236.19	-0.07244421	236.19	-0.1139706	236.19	-0.07474987	236.19	-0.07285999	236.19	-0.07397984
236.39	1.19001	236.39	1.089984	236.39	1.123926	236.39	1.123454	236.39	1.042294	236.39	1.100578	236.39	1.13512	236.39	-0.05615239	236.39	-0.1231402	236.39	-0.0846111	236.39	-0.1099864	236.39	-0.07212935	236.39	-0.1095837	236.39	-0.07215334	236.39	-0.07102364	236.39	-0.07464348
236.59	1.188856	236.59	1.09333	236.59	1.123371	236.59	1.12648	236.59	1.041924	236.59	1.099778	236.59	1.145352	236.59	-0.05639847	236.59	-0.1288779	236.59	-0.08903217	236.59	-0.1115046	236.59	-0.06847544	236.59	-0.1136057	236.59	-0.06918005	236.59	-0.07496784	236.59	-0.06929599
236.79	1.189357	236.79	1.090476	236.79	1.122134	236.79	1.124115	236.79	1.0485	236.79	1.108502	236.79	1.135419	236.79	-0.0549367	236.79	-0.1243651	236.79	-0.09265388	236.79	-0.1109239	236.79	-0.06755296	236.79	-0.1083687	236.79	-0.07358007	236.79	-0.074072	236.79	-0.07022791
236.99	1.190189	236.99	1.09237	236.99	1.123302	236.99	1.126305	236.99	1.045742	236.99	1.109786	236.99	1.136991	236.99	-0.05791625	236.99	-0.1242226	236.99	-0.09020896	236.99	-0.1126134	236.99	-0.07142258	236.99	-0.110797	236.99	-0.07064183	236.99	-0.06990658	236.99	-0.06540905
237.19	1.194083	237.19	1.08951	237.19	1.124349	237.19	1.127083	237.19	1.048796	237.19	1.105238	237.19	1.144036	237.19	-0.05802025	237.19	-0.1191501	237.19	-0.07942867	237.19	-0.1077667	237.19	-0.07476007	237.19	-0.1118967	237.19	-0.07291375	237.19	-0.07097202	237.19	-0.06580064
237.39	1.192451	237.39	1.090565	237.39	1.117908	237.39	1.128004	237.39	1.046132	237.39	1.106747	237.39	1.138106	237.39	-0.04915955	237.39	-0.1245525	237.39	-0.08454438	237.39	-0.1127094	237.39	-0.06993766	237.39	-0.1094823	237.39	-0.07006982	237.39	-0.07458176	237.39	-0.06819939
237.6	1.19577	237.6	1.087786	237.6	1.118117	237.6	1.128603	237.6	1.051276	237.6	1.101819	237.6	1.13973	237.6	-0.05510945	237.59	-0.1238781	237.59	-0.08950835	237.59	-0.1113321	237.59	-0.07244091	237.59	-0.1107651	237.59	-0.0701929	237.59	-0.07615327	237.59	-0.07018822
237.79	1.190511	237.79	1.090189	237.79	1.123954	237.79	1.132657	237.79	1.047323	237.79	1.10342	237.79	1.135529	237.79	-0.05405461	237.79	-0.1250928	237.79	-0.08617707	237.79	-0.1058442	237.79	-0.07276005	237.79	-0.1144934	237.79	-0.06937384	237.79	-0.07244886	237.79	-0.0695998
237.99	1.187441	237.99	1.092239	237.99	1.122326	237.99	1.129086	237.99	1.048318	237.99	1.101467	237.99	1.140075	237.99	-0.05670161	237.99	-0.124166	237.99	-0.08393519	237.99	-0.1118089	237.99	-0.07335132	237.99	-0.1151431	237.99	-0.06989288	237.99	-0.075666	237.99	-0.06782092
238.19	1.190981	238.19	1.091963	238.19	1.123448	238.19	1.131039	238.19	1.04417	238.19	1.103421	238.19	1.13545	238.19	-0.05592923	238.19	-0.1220863	238.19	-0.08696952	238.19	-0.1078233	238.19	-0.06730096	238.19	-0.1144717	238.19	-0.07390819	238.19	-0.07105879	238.19	-0.06729308
238.39	1.189253	238.39	1.087775	238.39	1.121193	238.39	1.123193	238.39	1.050926	238.39	1.109194	238.39	1.141747	238.39	-0.05690902	238.39	-0.1230251	238.39	-0.08681946	238.39	-0.1117646	238.39	-0.07281693	238.39	-0.111402	238.39	-0.06904596	238.39	-0.07374851	238.39	-0.07262622
238.59	1.193055	238.59	1.094176	238.59	1.125412	238.59	1.124249	238.59	1.050616	238.59	1.10652	238.59	1.141147	238.59	-0.05421238	238.59	-0.1176031	238.59	-0.08410597	238.59	-0.1129228	238.59	-0.06974127	238.59	-0.1136211	238.59	-0.0744386	238.59	-0.07285705	238.59	-0.06564727
238.79	1.191684	238.79	1.092386	238.79	1.122228	238.79	1.128333	238.79	1.048361	238.79	1.107209	238.79	1.135009	238.79	-0.05282265	238.79	-0.1212305	238.79	-0.08137006	238.79	-0.1082709	238.79	-0.07216683	238.79	-0.1111707	238.79	-0.07455835	238.79	-0.06969769	238.79	-0.06858832
238.99	1.193203	238.99	1.093057	238.99	1.123801	238.99	1.132159	238.99	1.044881	238.99	1.105239	238.99	1.142081	238.99	-0.05715626	238.99	-0.1249004	238.99	-0.08255489	238.99	-0.1068451	238.99	-0.07053729	238.99	-0.1110008	238.99	-0.07232065	238.99	-0.06914329	238.99	-0.0666166
239.19	1.192003	239.19	1.09121	239.19	1.120744	239.19	1.127209	239.19	1.053499	239.19	1.111906	239.19	1.141678	239.19	-0.05036693	239.19	-0.118701	239.19	-0.08686855	239.19	-0.1106797	239.19	-0.06716297	239.19	-0.1084498	239.19	-0.07155819	239.19	-0.06537336	239.19	-0.06977828
239.4	1.19409	239.4	1.093838	239.4	1.129066	239.4	1.132767	239.4	1.049903	239.4	1.108215	239.4	1.138615	239.4	-0.05011167	239.39	-0.1196704	239.39	-0.0843245	239.39	-0.1106849	239.39	-0.07036465	239.39	-0.1119003	239.39	-0.07779196	239.39	-0.07632737	239.39	-0.0705745
239.59	1.193237	239.59	1.094812	239.59	1.126991	239.59	1.131107	239.59	1.049813	239.59	1.104554	239.59	1.138332	239.59	-0.04586994	239.59	-0.1226192	239.59	-0.08318828	239.59	-0.1073203	239.59	-0.07395277	239.59	-0.1132795	239.59	-0.06914303	239.59	-0.07293574	239.59	-0.06912856
239.79	1.195554	239.79	1.096304	239.79	1.128471	239.79	1.133357	239.79	1.049253	239.79	1.109567	239.79	1.136645	239.79	-0.05578771	239.79	-0.1212254	239.79	-0.08066136	239.79	-0.1095185	239.79	-0.07178894	239.79	-0.1089682	239.79	-0.06994861	239.79	-0.07005245	239.79	-0.07276405
239.99	1.192367	239.99	1.098369	239.99	1.125295	239.99	1.133342	239.99	1.050796	239.99	1.109324	239.99	1.135454	239.99	-0.05175373	239.99	-0.124192	239.99	-0.085147	239.99	-0.1076074	239.99	-0.07607827	239.99	-0.1103099	239.99	-0.06935117	239.99	-0.07073193	239.99	-0.06954912
240.19	1.192037	240.19	1.091487	240.19	1.123642	240.19	1.129397	240.19	1.04857	240.19	1.106229	240.19	1.137049	240.19	-0.06079806	240.19	-0.1174772	240.19	-0.08606191	240.19	-0.1124805	240.19	-0.06455027	240.19	-0.1141657	240.19	-0.06749272	240.19	-0.07071243	240.19	-0.06701
240.39	1.195072	240.39	1.09551	240.39	1.123119	240.39	1.130863	240.39	1.049478	240.39	1.110266	240.39	1.135116	240.39	-0.05091892	240.39	-0.1221509	240.39	-0.08424786	240.39	-0.1128724	240.39	-0.06959625	240.39	-0.113341	240.39	-0.0691201	240.39	-0.07121628	240.39	-0.07028118
240.59	1.194396	240.59	1.097001	240.59	1.126789	240.59	1.132165	240.59	1.052088	240.59	1.112508	240.59	1.136825	240.59	-0.05273556	240.59	-0.1214294	240.59	-0.08681366	240.59	-0.1139594	240.59	-0.07166178	240.59	-0.112371	240.59	-0.06798822	240.59	-0.06571753	240.59	-0.06504046
240.79	1.191214	240.79	1.090093	240.79	1.12528	240.79	1.132911	240.79	1.050106	240.79	1.106284	240.79	1.13879	240.79	-0.05215603	240.8	-0.1215401	240.8	-0.08734576	240.8	-0.1086522	240.8	-0.07005727	240.8	-0.1135251	240.8	-0.06749006	240.8	-0.06849373	240.8	-0.06440209
240.99	1.195931	240.99	1.097052	240.99	1.122798	240.99	1.133962	240.99	1.051616	240.99	1.107165	240.99	1.140508	240.99	-0.05438685	240.99	-0.1235317	240.99	-0.08676527	240.99	-0.1102632	240.99	-0.07056212	240.99	-0.1101301	240.99	-0.07014392	240.99	-0.070273	240.99	-0.06402098
241.19	1.195392	241.19	1.096476	241.19	1.121137	241.19	1.129459	241.19	1.04738	241.19	1.105905	241.19	1.137057	241.19	-0.04948372	241.19	-0.1177764	241.19	-0.07914067	241.19	-0.1112409	241.19	-0.0690958	241.19	-0.1107565	241.19	-0.06893837	241.19	-0.06880099	241.19	-0.06353586
241.39	1.195737	241.39	1.096812	241.39	1.126961	241.39	1.132787	241.39	1.052058	241.39	1.110919	241.39	1.141427	241.39	-0.05077122	241.39	-0.120536	241.39	-0.08715196	241.39	-0.1099514	241.39	-0.071732	241.39	-0.1102777	241.39	-0.06541641	241.39	-0.07361507	241.39	-0.06774602
241.59	1.194481	241.59	1.092605	241.59	1.128557	241.59	1.129084	241.59	1.051057	241.59	1.105467	241.59	1.139262	241.59	-0.05284392	241.59	-0.1196605	241.59	-0.08266927	241.59	-0.1069341	241.59	-0.07310126	241.59	-0.1102916	241.59	-0.0679175	241.59	-0.07367554	241.59	-0.0700267
241.79	1.192967	241.79	1.094659	241.79	1.127468	241.79	1.136389	241.79	1.048307	241.79	1.111492	241.79	1.137877	241.79	-0.05359198	241.79	-0.1198544	241.79	-0.08327007	241.79	-0.1106617	241.79	-0.0704897	241.79	-0.110089	241.79	-0.06627636	241.79	-0.06947123	241.79	-0.06896906
241.99	1.196109	241.99	1.091662	241.99	1.128859	241.99	1.136749	241.99	1.053435	241.99	1.106626	241.99	1.138768	241.99	-0.05505317	241.99	-0.1213144	241.99	-0.0854015	241.99	-0.108823	241.99	-0.06662218	241.99	-0.1144516	241.99	-0.0694459	241.99	-0.0744821	241.99	-0.06563552
242.19	1.198067	242.19	1.096541	242.19	1.129209	242.19	1.133258	242.19	1.0434	242.19	1.11273	242.19	1.141978	242.19	-0.052238	242.19	-0.1157224	242.19	-0.08451504	242.19	-0.1087278	242.19	-0.0684417	242.19	-0.1059131	242.19	-0.06756074	242.19	-0.07291159	242.19	-0.06657721
242.39	1.196247	242.39	1.096398	242.39	1.131291	242.39	1.131222	242.39	1.049019	242.39	1.106154	242.39	1.14139	242.39	-0.05110509	242.39	-0.1219765	242.39	-0.08090331	242.39	-0.1066787	242.39	-0.06901277	242.39	-0.1105372	242.39	-0.06987927	242.39	-0.07188819	242.39	-0.0680427
242.59	1.19716	242.59	1.096235	242.59	1.125913	242.59	1.134372	242.59	1.055753	242.59	1.111163	242.59	1.138833	242.59	-0.05111542	242.59	-0.1171896	242.59	-0.08580434	242.59	-0.1121424	242.59	-0.06378036	242.59	-0.1100927	242.59	-0.0735902	242.59	-0.07592358	242.59	-0.06856351
242.79	1.202434	242.79	1.096707	242.79	1.128668	242.79	1.132544	242.79	1.052437	242.79	1.107715	242.79	1.141414	242.79	-0.05253515	242.79	-0.1179621	242.79	-0.0778488	242.79	-0.1063267	242.79	-0.06793682	242.79	-0.1043444	242.79	-0.06836352	242.79	-0.06926373	242.79	-0.064569
242.99	1.193433	242.99	1.099911	242.99	1.12696	242.99	1.13525	242.99	1.049921	242.99	1.110541	242.99	1.142275	242.99	-0.0540828	242.99	-0.1213457	242.99	-0.07837036	242.99	-0.1116417	242.99	-0.06527739	242.99	-0.1126298	242.99	-0.06890086	242.99	-0.07076371	242.99	-0.06395633
243.19	1.197605	243.19	1.09848	243.19	1.129343	243.19	1.132466	243.19	1.047955	243.19	1.108204	243.19	1.140209	243.19	-0.0502099	243.19	-0.1220231	243.19	-0.08141986	243.19	-0.10845	243.19	-0.06934071	243.19	-0.1100416	243.19	-0.06602669	243.19	-0.07083745	243.19	-0.06848984
243.39	1.200485	243.39	1.098294	243.39	1.130023	243.39	1.134337	243.39	1.047354	243.39	1.109211	243.39	1.140027	243.39	-0.05450498	243.39	-0.1204057	243.39	-0.08290155	243.39	-0.1068204	243.39	-0.06822792	243.39	-0.1022154	243.39	-0.06800455	243.39	-0.06832307	243.39	-0.06758545
243.59	1.199865	243.59	1.096164	243.59	1.129117	243.59	1.129568	243.59	1.05348	243.59	1.108158	243.59	1.144948	243.59	-0.05627731	243.59	-0.1249894	243.59	-0.08693527	243.59	-0.1086049	243.59	-0.06521384	243.59	-0.1093595	243.59	-0.066164	243.59	-0.06850089	243.59	-0.06435794
243.79	1.198102	243.79	1.099456	243.79	1.125428	243.79	1.13715	243.79	1.053378	243.79	1.113563	243.79	1.143832	243.79	-0.05011144	243.79	-0.1203372	243.79	-0.08691144	243.79	-0.1092105	243.79	-0.06651447	243.79	-0.1112116	243.79	-0.06588292	243.79	-0.0737589	243.79	-0.0700446
243.99	1.200736	243.99	1.10037	243.99	1.130759	243.99	1.130304	243.99	1.053935	243.99	1.107629	243.99	1.142602	243.99	-0.04783914	243.99	-0.1199056	243.99	-0.08247839	243.99	-0.1092882	243.99	-0.06974607	243.99	-0.1121622	243.99	-0.06712341	243.99	-0.07055067	243.99	-0.06574143
244.19	1.198806	244.19	1.096023	244.19	1.126416	244.19	1.129774	244.19	1.050799	244.19	1.110222	244.19	1.139146	244.19	-0.04805814	244.19	-0.122476	244.19	-0.08388344	244.19	-0.1104033	244.19	-0.07032424	244.19	-0.1123235	244.19	-0.06869681	244.19	-0.06462462	244.19	-0.06931643
244.39	1.204356	244.39	1.099017	244.39	1.130615	244.39	1.131742	244.39	1.050137	244.39	1.110631	244.39	1.140606	244.39	-0.05061392	244.39	-0.1165131	244.39	-0.08283506	244.39	-0.1112452	244.39	-0.06754447	244.39	-0.1069959	244.39	-0.06435474	244.39	-0.06823408	244.39	-0.06417728
244.59	1.200741	244.59	1.100111	244.59	1.127663	244.59	1.134771	244.59	1.052234	244.59	1.111131	244.59	1.141754	244.59	-0.04986494	244.59	-0.1211719	244.59	-0.08346356	244.59	-0.1066321	244.59	-0.06778888	244.59	-0.1094578	244.59	-0.0720979	244.59	-0.06767266	244.59	-0.06545477
244.79	1.197692	244.79	1.094638	244.79	1.124289	244.79	1.132089	244.79	1.05232	244.79	1.108412	244.79	1.140498	244.79	-0.05247941	244.79	-0.1205934	244.79	-0.0858499	244.79	-0.1083206	244.79	-0.068667	244.79	-0.1076058	244.79	-0.06862628	244.79	-0.07045607	244.79	-0.06705936
244.99	1.199081	244.99	1.097332	244.99	1.131445	244.99	1.137184	244.99	1.05523	244.99	1.112597	244.99	1.140468	244.99	-0.04745185	244.99	-0.1193703	244.99	-0.08106071	244.99	-0.1073318	244.99	-0.06760571	244.99	-0.107323	244.99	-0.07211294	244.99	-0.06901498	244.99	-0.06435061
245.19	1.201432	245.19	1.100046	245.19	1.133824	245.19	1.133972	245.19	1.056117	245.19	1.115835	245.19	1.14292	245.19	-0.05037099	245.19	-0.1138001	245.19	-0.08179581	245.19	-0.1086191	245.19	-0.06495154	245.19	-0.1067839	245.19	-0.06537244	245.19	-0.06599578	245.19	-0.06304346
245.39	1.203204	245.39	1.097468	245.39	1.127502	245.39	1.138788	245.39	1.052527	245.39	1.113209	245.39	1.141778	245.39	-0.04766903	245.39	-0.1207429	245.39	-0.08136886	245.39	-0.1088779	245.39	-0.06825956	245.39	-0.1093031	245.39	-0.07215066	245.39	-0.06492607	245.39	-0.06929022
245.59	1.199725	245.59	1.098828	245.59	1.130491	245.59	1.136491	245.59	1.053612	245.59	1.113453	245.59	1.140243	245.59	-0.0505429	245.59	-0.1166085	245.59	-0.07949016	245.59	-0.1074972	245.59	-0.06849796	245.59	-0.1064137	245.59	-0.0619689	245.59	-0.07575853	245.59	-0.06423686
245.79	1.201152	245.79	1.101876	245.79	1.13313	245.79	1.13493	245.79	1.055196	245.79	1.113347	245.79	1.137058	245.79	-0.0490575	245.79	-0.1162393	245.79	-0.0829717	245.79	-0.1047921	245.79	-0.07194354	245.79	-0.1068693	245.79	-0.07050961	245.79	-0.06554404	245.79	-0.06630931
245.99	1.197794	245.99	1.097108	245.99	1.133084	245.99	1.139173	245.99	1.054119	245.99	1.112039	245.99	1.145099	245.99	-0.04866685	245.99	-0.11591	245.99	-0.08004274	245.99	-0.1038009	245.99	-0.06853557	245.99	-0.1108446	245.99	-0.06828928	245.99	-0.07085286	245.99	-0.06468076
246.19	1.198968	246.19	1.100819	246.19	1.134912	246.19	1.134194	246.19	1.055896	246.19	1.107695	246.19	1.146486	246.19	-0.04706463	246.19	-0.113681	246.19	-0.0838311	246.19	-0.1063973	246.19	-0.06996772	246.19	-0.109147	246.19	-0.06686167	246.19	-0.0699992	246.19	-0.06960517
246.39	1.202034	246.39	1.103778	246.39	1.13629	246.39	1.133225	246.39	1.057654	246.39	1.112797	246.39	1.144691	246.39	-0.05424588	246.39	-0.1172451	246.39	-0.08304171	246.39	-0.1062493	246.39	-0.06490531	246.39	-0.1091992	246.39	-0.07073479	246.39	-0.07003812	246.39	-0.06566137
246.59	1.201445	246.59	1.103142	246.59	1.136995	246.59	1.136959	246.59	1.055832	246.59	1.108667	246.59	1.141958	246.59	-0.05326093	246.59	-0.1132076	246.59	-0.08231154	246.59	-0.1089188	246.59	-0.06392466	246.59	-0.1081297	246.59	-0.06925761	246.59	-0.07047714	246.59	-0.06368341
246.79	1.204653	246.79	1.103833	246.79	1.135575	246.79	1.135997	246.79	1.05622	246.79	1.112045	246.79	1.149964	246.79	-0.0516532	246.79	-0.116943	246.79	-0.08132763	246.79	-0.1099602	246.79	-0.06812633	246.79	-0.1084768	246.79	-0.06981253	246.79	-0.06577899	246.79	-0.06802516
246.99	1.205481	246.99	1.102031	246.99	1.128742	246.99	1.13809	246.99	1.057806	246.99	1.111562	246.99	1.140025	246.99	-0.05449878	246.99	-0.1174135	246.99	-0.08191141	246.99	-0.1076742	246.99	-0.06734034	246.99	-0.1074729	246.99	-0.06610873	246.99	-0.06476609	246.99	-0.06439906
247.19	1.202857	247.19	1.104576	247.19	1.136862	247.19	1.140867	247.19	1.054865	247.19	1.115005	247.19	1.14051	247.19	-0.0549052	247.19	-0.1157499	247.19	-0.08388597	247.19	-0.1078501	247.19	-0.07016078	247.19	-0.1131457	247.19	-0.0653915	247.19	-0.06855103	247.19	-0.06634178
247.39	1.201961	247.39	1.10254	247.39	1.131471	247.39	1.134676	247.39	1.055623	247.39	1.11732	247.39	1.144314	247.39	-0.05060875	247.4	-0.1153188	247.4	-0.08315703	247.4	-0.1086724	247.4	-0.06249536	247.4	-0.111557	247.4	-0.06354762	247.4	-0.06859322	247.4	-0.06742635
247.59	1.207018	247.59	1.105203	247.59	1.138428	247.59	1.135358	247.59	1.050812	247.59	1.109995	247.59	1.145075	247.59	-0.05038822	247.59	-0.1157309	247.59	-0.07853597	247.59	-0.1079902	247.59	-0.06455414	247.59	-0.1081063	247.59	-0.06868395	247.59	-0.06632354	247.59	-0.06507822
247.79	1.204432	247.79	1.10265	247.79	1.136166	247.79	1.142078	247.79	1.05706	247.79	1.11109	247.79	1.147815	247.79	-0.04655661	247.79	-0.1191343	247.79	-0.08041184	247.79	-0.1086842	247.79	-0.06878212	247.79	-0.109506	247.79	-0.06409365	247.79	-0.06867582	247.79	-0.06396273
247.99	1.197754	247.99	1.101316	247.99	1.127849	247.99	1.138907	247.99	1.055878	247.99	1.114839	247.99	1.149103	247.99	-0.05391002	247.99	-0.1149356	247.99	-0.08508249	247.99	-0.1037499	247.99	-0.0727094	247.99	-0.1034615	247.99	-0.06517237	247.99	-0.07220802	247.99	-0.06592656
248.2	1.199655	248.2	1.102182	248.2	1.132838	248.2	1.137416	248.2	1.056356	248.2	1.115149	248.2	1.150352	248.2	-0.04807948	248.19	-0.1172907	248.19	-0.0824086	248.19	-0.09920327	248.19	-0.06545752	248.19	-0.108748	248.19	-0.06763204	248.19	-0.06828216	248.19	-0.0607984
248.39	1.201234	248.39	1.100741	248.39	1.135242	248.39	1.140399	248.39	1.056784	248.39	1.114814	248.39	1.143901	248.39	-0.04899271	248.4	-0.1156398	248.4	-0.08349523	248.4	-0.103923	248.4	-0.06723855	248.4	-0.1070267	248.4	-0.06662302	248.4	-0.06400055	248.4	-0.0674388
248.59	1.202177	248.59	1.106399	248.59	1.133391	248.59	1.137138	248.59	1.054072	248.59	1.111313	248.59	1.149364	248.59	-0.05300105	248.59	-0.1183836	248.59	-0.07811861	248.59	-0.109758	248.59	-0.06394512	248.59	-0.1055454	248.59	-0.06643212	248.59	-0.06310894	248.59	-0.06775542
248.79	1.203111	248.79	1.100132	248.79	1.137941	248.79	1.139794	248.79	1.055284	248.79	1.112965	248.79	1.14521	248.79	-0.05182371	248.79	-0.1194654	248.79	-0.08473358	248.79	-0.1055154	248.79	-0.06507052	248.79	-0.1052349	248.79	-0.06369689	248.79	-0.06649099	248.79	-0.05998521
248.99	1.20759	248.99	1.103427	248.99	1.137093	248.99	1.140269	248.99	1.056239	248.99	1.114115	248.99	1.140927	248.99	-0.04751296	248.99	-0.1148155	248.99	-0.08070593	248.99	-0.1010023	248.99	-0.06329768	248.99	-0.1094596	248.99	-0.06588844	248.99	-0.06580704	248.99	-0.06310543
249.19	1.204667	249.19	1.100611	249.19	1.136009	249.19	1.144653	249.19	1.057302	249.19	1.114112	249.19	1.150964	249.19	-0.05086641	249.19	-0.1138162	249.19	-0.07947426	249.19	-0.1068547	249.19	-0.06458236	249.19	-0.1049175	249.19	-0.06617946	249.19	-0.06848375	249.19	-0.05949434
249.39	1.208157	249.39	1.10753	249.39	1.136621	249.39	1.139485	249.39	1.057726	249.39	1.112976	249.39	1.146791	249.39	-0.04996583	249.39	-0.1185308	249.39	-0.07598852	249.39	-0.1052052	249.39	-0.06568408	249.39	-0.1085457	249.39	-0.06378016	249.39	-0.06535994	249.39	-0.06611807
249.59	1.205747	249.59	1.103515	249.59	1.135638	249.59	1.141855	249.59	1.057476	249.59	1.114347	249.59	1.143437	249.59	-0.04932293	249.59	-0.1112963	249.59	-0.08060808	249.59	-0.1069137	249.59	-0.06624222	249.59	-0.1069683	249.59	-0.06877432	249.59	-0.06636912	249.59	-0.05947419
249.79	1.203191	249.79	1.105168	249.79	1.140668	249.79	1.139155	249.79	1.055401	249.79	1.114821	249.79	1.149172	249.79	-0.04552251	249.79	-0.1212749	249.79	-0.07975318	249.79	-0.1077494	249.79	-0.06637064	249.79	-0.109727	249.79	-0.06509057	249.79	-0.06869585	249.79	-0.06173467
249.99	1.209157	249.99	1.103436	249.99	1.134244	249.99	1.139457	249.99	1.057397	249.99	1.111783	249.99	1.146073	249.99	-0.04995774	249.99	-0.1208082	249.99	-0.08389381	249.99	-0.1076735	249.99	-0.06265877	249.99	-0.1067937	249.99	-0.06812432	249.99	-0.06541585	249.99	-0.06450689
250.19	1.205979	250.19	1.105794	250.19	1.133023	250.19	1.137431	250.19	1.054378	250.19	1.11661	250.19	1.142957	250.19	-0.04949975	250.19	-0.1122255	250.19	-0.07781507	250.19	-0.1057834	250.19	-0.06319391	250.19	-0.1094387	250.19	-0.06587166	250.19	-0.06998355	250.19	-0.06708862
250.39	1.202982	250.39	1.110842	250.39	1.137254	250.39	1.137167	250.39	1.055542	250.39	1.113666	250.39	1.152035	250.39	-0.05357857	250.39	-0.1156504	250.39	-0.07951798	250.39	-0.10178	250.39	-0.06556315	250.39	-0.1080512	250.39	-0.06622256	250.39	-0.06589323	250.39	-0.06130335
250.59	1.206128	250.59	1.104228	250.59	1.137089	250.59	1.140453	250.59	1.059063	250.59	1.116262	250.59	1.149368	250.59	-0.04965357	250.59	-0.1153001	250.59	-0.07930306	250.59	-0.1069036	250.59	-0.06703786	250.59	-0.1069431	250.59	-0.06773173	250.59	-0.06531233	250.59	-0.06596684
250.79	1.206768	250.79	1.108837	250.79	1.135134	250.79	1.143764	250.79	1.055853	250.79	1.113461	250.79	1.147818	250.79	-0.04881071	250.79	-0.1096539	250.79	-0.07893369	250.79	-0.1079983	250.79	-0.06241723	250.79	-0.1065214	250.79	-0.06682685	250.79	-0.06890162	250.79	-0.06236916
250.99	1.202187	250.99	1.10739	250.99	1.137092	250.99	1.142635	250.99	1.063024	250.99	1.113996	250.99	1.147315	250.99	-0.04786601	250.99	-0.1122503	250.99	-0.079385	250.99	-0.1037025	250.99	-0.059922	250.99	-0.1064823	250.99	-0.06215863	250.99	-0.06619634	250.99	-0.06548635
251.19	1.208113	251.19	1.100939	251.19	1.136466	251.19	1.142208	251.19	1.057088	251.19	1.118066	251.19	1.146305	251.19	-0.05001137	251.19	-0.1180867	251.19	-0.07713158	251.19	-0.1031989	251.19	-0.06565955	251.19	-0.1063897	251.19	-0.0663435	251.19	-0.06757205	251.19	-0.0664531
251.39	1.210838	251.39	1.102904	251.39	1.139025	251.39	1.144462	251.39	1.060893	251.39	1.115456	251.39	1.148102	251.39	-0.04747967	251.39	-0.116803	251.39	-0.07742051	251.39	-0.1025388	251.39	-0.06685193	251.39	-0.1063139	251.39	-0.0627391	251.39	-0.06271213	251.39	-0.06186892
251.59	1.207596	251.59	1.103282	251.59	1.135067	251.59	1.141586	251.59	1.06262	251.59	1.118419	251.59	1.147236	251.59	-0.04912942	251.59	-0.1124896	251.59	-0.08034394	251.59	-0.1046412	251.59	-0.0654384	251.59	-0.1050809	251.59	-0.06492855	251.59	-0.06334274	251.59	-0.06501125
251.79	1.211399	251.79	1.111193	251.79	1.133777	251.79	1.138442	251.79	1.063268	251.79	1.118845	251.79	1.148698	251.79	-0.04835923	251.79	-0.1153653	251.79	-0.07937571	251.79	-0.1034371	251.79	-0.06726452	251.79	-0.105427	251.79	-0.06481431	251.79	-0.06532182	251.79	-0.06484311
251.99	1.207953	251.99	1.102581	251.99	1.141195	251.99	1.144939	251.99	1.061055	251.99	1.120004	251.99	1.14478	251.99	-0.05044394	251.99	-0.1131654	251.99	-0.07715242	251.99	-0.1024614	251.99	-0.06154091	251.99	-0.1057034	251.99	-0.06588402	251.99	-0.06416745	251.99	-0.06099637
252.19	1.210098	252.19	1.110272	252.19	1.140278	252.19	1.142937	252.19	1.057339	252.19	1.112004	252.19	1.146137	252.19	-0.05075065	252.19	-0.1142403	252.19	-0.07687858	252.19	-0.1042081	252.19	-0.05907797	252.19	-0.1066079	252.19	-0.0646166	252.19	-0.06455677	252.19	-0.06147283
252.39	1.204754	252.39	1.104597	252.39	1.141186	252.39	1.139394	252.39	1.058188	252.39	1.118313	252.39	1.149392	252.39	-0.04445594	252.39	-0.1188142	252.39	-0.0811855	252.39	-0.1080277	252.39	-0.06773075	252.39	-0.1040075	252.39	-0.06542118	252.39	-0.06558219	252.39	-0.06589136
252.59	1.21463	252.59	1.106184	252.59	1.139017	252.59	1.141384	252.59	1.058257	252.59	1.114933	252.59	1.144855	252.59	-0.0477811	252.59	-0.1149859	252.59	-0.08265597	252.59	-0.101536	252.59	-0.06459095	252.59	-0.105698	252.59	-0.06684799	252.59	-0.06479344	252.59	-0.05960919
252.79	1.207916	252.79	1.104585	252.79	1.138786	252.79	1.139865	252.79	1.059743	252.79	1.116249	252.79	1.143334	252.79	-0.04822337	252.79	-0.1147406	252.79	-0.07912959	252.79	-0.1076226	252.79	-0.06234501	252.79	-0.1065845	252.79	-0.06710935	252.79	-0.067079	252.79	-0.06115641
252.99	1.203588	252.99	1.10812	252.99	1.142303	252.99	1.144945	252.99	1.059631	252.99	1.115261	252.99	1.15247	252.99	-0.04817635	252.99	-0.1136446	252.99	-0.07718161	252.99	-0.1049606	252.99	-0.06396782	252.99	-0.1073522	252.99	-0.0634895	252.99	-0.06694139	252.99	-0.0643798
253.19	1.205816	253.19	1.108701	253.19	1.142296	253.19	1.142108	253.19	1.061518	253.19	1.119017	253.19	1.149032	253.19	-0.04611459	253.19	-0.1209447	253.19	-0.07745166	253.19	-0.1055399	253.19	-0.06364652	253.19	-0.1005773	253.19	-0.06499486	253.19	-0.06125429	253.19	-0.06519458
253.39	1.212668	253.39	1.112995	253.39	1.135671	253.39	1.140689	253.39	1.058445	253.39	1.112885	253.39	1.148099	253.39	-0.04625156	253.39	-0.1154089	253.39	-0.07847661	253.39	-0.100306	253.39	-0.06266584	253.39	-0.1075947	253.39	-0.0639948	253.39	-0.06478466	253.39	-0.06213506
253.59	1.209893	253.59	1.107538	253.59	1.139985	253.59	1.142749	253.59	1.060521	253.59	1.119141	253.59	1.143335	253.59	-0.04229873	253.59	-0.1125757	253.59	-0.07702539	253.59	-0.1005093	253.59	-0.06592754	253.59	-0.108527	253.59	-0.06662255	253.59	-0.06482117	253.59	-0.05816276
253.79	1.210487	253.79	1.109271	253.79	1.137209	253.79	1.146402	253.79	1.058416	253.79	1.116538	253.79	1.150159	253.79	-0.04309269	253.79	-0.1175632	253.79	-0.07661401	253.79	-0.1005945	253.79	-0.06055757	253.79	-0.1020549	253.79	-0.06312688	253.79	-0.06605981	253.79	-0.05852935
253.99	1.209755	253.99	1.110618	253.99	1.137356	253.99	1.146957	253.99	1.056373	253.99	1.116189	253.99	1.142138	253.99	-0.04095726	254	-0.1184519	254	-0.07986467	254	-0.102448	254	-0.0624585	254	-0.105905	254	-0.06376138	254	-0.06626868	254	-0.06201226
254.19	1.207918	254.19	1.107893	254.19	1.141278	254.19	1.147225	254.19	1.062684	254.19	1.115792	254.19	1.150307	254.19	-0.04528487	254.19	-0.1148627	254.19	-0.07533612	254.19	-0.1053451	254.19	-0.06501005	254.19	-0.1084737	254.19	-0.06586382	254.19	-0.06504487	254.19	-0.06692526
254.39	1.212827	254.39	1.106855	254.39	1.138666	254.39	1.149777	254.39	1.056108	254.39	1.123546	254.39	1.152305	254.39	-0.04844087	254.39	-0.1143085	254.39	-0.07700325	254.39	-0.1045174	254.39	-0.06626668	254.39	-0.1061756	254.39	-0.06660835	254.39	-0.06688817	254.39	-0.0607953
254.59	1.208802	254.59	1.104076	254.59	1.143279	254.59	1.152732	254.59	1.06328	254.59	1.115406	254.59	1.146795	254.59	-0.04672274	254.59	-0.1149047	254.59	-0.0781273	254.59	-0.1061433	254.59	-0.06565461	254.59	-0.1057767	254.59	-0.06449687	254.59	-0.0590947	254.59	-0.05917204
254.79	1.215335	254.79	1.109635	254.79	1.140855	254.79	1.142712	254.79	1.061714	254.79	1.117041	254.79	1.149152	254.79	-0.04842637	254.79	-0.1125672	254.79	-0.0823319	254.79	-0.1047863	254.79	-0.05869995	254.79	-0.1066236	254.79	-0.06518785	254.79	-0.06107497	254.79	-0.06729449
254.99	1.209608	254.99	1.115978	254.99	1.143381	254.99	1.142689	254.99	1.066608	254.99	1.119658	254.99	1.148934	254.99	-0.04663185	254.99	-0.1117166	254.99	-0.08090308	254.99	-0.1027278	254.99	-0.05843545	254.99	-0.1039015	254.99	-0.06151376	254.99	-0.06111135	254.99	-0.06122705
255.19	1.213382	255.19	1.108582	255.19	1.140639	255.19	1.144246	255.19	1.059145	255.19	1.118696	255.19	1.150017	255.19	-0.04474292	255.2	-0.1145643	255.2	-0.07865204	255.2	-0.1075501	255.2	-0.06703641	255.2	-0.1046995	255.2	-0.06297347	255.2	-0.06142007	255.2	-0.06082521
255.39	1.21233	255.39	1.11418	255.39	1.142733	255.39	1.147811	255.39	1.063015	255.39	1.11808	255.39	1.155075	255.39	-0.0486725	255.39	-0.1173216	255.39	-0.08170382	255.39	-0.1053306	255.39	-0.06471948	255.39	-0.100085	255.39	-0.06260805	255.39	-0.0618614	255.39	-0.06223898
255.59	1.211993	255.59	1.113916	255.59	1.141786	255.59	1.147887	255.59	1.058693	255.59	1.122318	255.59	1.149337	255.59	-0.04690537	255.59	-0.1103857	255.59	-0.07527858	255.59	-0.1030275	255.59	-0.06010533	255.59	-0.1080471	255.59	-0.06423827	255.59	-0.06188703	255.59	-0.06477947
255.79	1.211187	255.79	1.112699	255.79	1.141452	255.79	1.144893	255.79	1.065395	255.79	1.119195	255.79	1.153699	255.79	-0.04674959	255.79	-0.1103464	255.79	-0.07767595	255.79	-0.1041125	255.79	-0.06557421	255.79	-0.1059855	255.79	-0.0643675	255.79	-0.0658199	255.79	-0.05823864
255.99	1.209742	255.99	1.112471	255.99	1.138381	255.99	1.143462	255.99	1.061257	255.99	1.121651	255.99	1.146134	255.99	-0.04835188	255.99	-0.1124297	255.99	-0.0798928	255.99	-0.1055109	255.99	-0.0606702	255.99	-0.09936139	255.99	-0.06664699	255.99	-0.06682505	255.99	-0.05900225
256.19	1.211397	256.19	1.112165	256.19	1.141177	256.19	1.142242	256.19	1.06235	256.19	1.114035	256.19	1.148065	256.19	-0.04704913	256.19	-0.1109097	256.19	-0.07443874	256.19	-0.09851239	256.19	-0.06522718	256.19	-0.105442	256.19	-0.06338046	256.19	-0.05949165	256.19	-0.06104001
256.39	1.217451	256.39	1.10903	256.39	1.141244	256.39	1.145602	256.39	1.065568	256.39	1.116398	256.39	1.148107	256.39	-0.04607399	256.39	-0.1083679	256.39	-0.07777099	256.39	-0.1075773	256.39	-0.06500473	256.39	-0.1056324	256.39	-0.0634659	256.39	-0.06246718	256.39	-0.06157608
256.59	1.210322	256.59	1.114212	256.59	1.144896	256.59	1.146555	256.59	1.064717	256.59	1.118158	256.59	1.153509	256.59	-0.04632694	256.59	-0.111223	256.59	-0.07276125	256.59	-0.101893	256.59	-0.06597606	256.59	-0.1030719	256.59	-0.06400747	256.59	-0.06849992	256.59	-0.06257303
256.8	1.211773	256.8	1.111185	256.8	1.142853	256.8	1.144635	256.8	1.059425	256.8	1.120427	256.8	1.146689	256.8	-0.04336325	256.79	-0.1082681	256.79	-0.07197	256.79	-0.09988561	256.79	-0.06252027	256.79	-0.1066318	256.79	-0.06575444	256.79	-0.06478598	256.79	-0.05863578
256.99	1.214278	256.99	1.112945	256.99	1.142629	256.99	1.148683	256.99	1.063026	256.99	1.116326	256.99	1.153019	256.99	-0.04478893	256.99	-0.1113022	256.99	-0.07466946	256.99	-0.1022979	256.99	-0.05887542	256.99	-0.1059169	256.99	-0.06238201	256.99	-0.06465749	256.99	-0.05924292
257.19	1.215106	257.19	1.110998	257.19	1.143183	257.19	1.143976	257.19	1.0675	257.19	1.121808	257.19	1.148878	257.19	-0.04348652	257.19	-0.114617	257.19	-0.07284216	257.19	-0.1046025	257.19	-0.06467954	257.19	-0.1018775	257.19	-0.06905616	257.19	-0.06089157	257.19	-0.05696929
257.39	1.213719	257.39	1.1213	257.39	1.144909	257.39	1.147928	257.39	1.058954	257.39	1.115182	257.39	1.148536	257.39	-0.04380175	257.39	-0.1129439	257.39	-0.07664056	257.39	-0.1046344	257.39	-0.05952594	257.39	-0.1038177	257.39	-0.06903598	257.39	-0.06661128	257.39	-0.06843822
257.59	1.215921	257.59	1.115955	257.59	1.14344	257.59	1.149683	257.59	1.064847	257.59	1.11906	257.59	1.149187	257.59	-0.04225276	257.59	-0.1071245	257.59	-0.0771473	257.59	-0.1025046	257.59	-0.0632144	257.59	-0.1025164	257.59	-0.06477541	257.59	-0.06452544	257.59	-0.06024064
257.8	1.210743	257.8	1.108799	257.8	1.145563	257.8	1.147217	257.8	1.061914	257.8	1.120532	257.8	1.149174	257.8	-0.04198874	257.79	-0.1131817	257.79	-0.07710042	257.79	-0.09880737	257.79	-0.06241047	257.79	-0.1098286	257.79	-0.06066434	257.79	-0.06459451	257.79	-0.06158945
257.99	1.212149	257.99	1.110719	257.99	1.14209	257.99	1.14456	257.99	1.064873	257.99	1.117757	257.99	1.154226	257.99	-0.04858755	257.99	-0.1120607	257.99	-0.06998546	257.99	-0.1013013	257.99	-0.06186552	257.99	-0.1096146	257.99	-0.06121502	257.99	-0.06693892	257.99	-0.06207947
258.19	1.215088	258.19	1.113992	258.19	1.139038	258.19	1.154065	258.19	1.06413	258.19	1.128682	258.19	1.154963	258.19	-0.0474721	258.19	-0.1078803	258.19	-0.07469555	258.19	-0.1022274	258.19	-0.06221367	258.19	-0.1016865	258.19	-0.06611571	258.19	-0.06321206	258.19	-0.05992977
258.39	1.210729	258.39	1.110925	258.39	1.142959	258.39	1.148717	258.39	1.058477	258.39	1.126979	258.39	1.149089	258.39	-0.04707877	258.39	-0.1095759	258.39	-0.07572497	258.39	-0.1054618	258.39	-0.06201385	258.39	-0.1020551	258.39	-0.05908561	258.39	-0.06886569	258.39	-0.06288114
258.6	1.215863	258.6	1.112687	258.6	1.142247	258.6	1.148746	258.6	1.065082	258.6	1.118268	258.6	1.152989	258.6	-0.04315476	258.59	-0.110099	258.59	-0.07689253	258.59	-0.1022918	258.59	-0.0611818	258.59	-0.1059923	258.59	-0.06196246	258.59	-0.05666046	258.59	-0.06240844
258.79	1.215855	258.79	1.105993	258.79	1.146917	258.79	1.148046	258.79	1.060299	258.79	1.12618	258.79	1.153186	258.79	-0.04537401	258.79	-0.1139929	258.79	-0.07841621	258.79	-0.1018039	258.79	-0.06460766	258.79	-0.1063992	258.79	-0.06269213	258.79	-0.06554628	258.79	-0.05908003
258.99	1.213276	258.99	1.112797	258.99	1.145523	258.99	1.147025	258.99	1.06368	258.99	1.12089	258.99	1.152893	258.99	-0.04482782	258.99	-0.1093755	258.99	-0.07855818	258.99	-0.1031846	258.99	-0.06737795	258.99	-0.1066747	258.99	-0.0575588	258.99	-0.06459902	258.99	-0.0601513
259.19	1.214761	259.19	1.112214	259.19	1.144639	259.19	1.148456	259.19	1.064377	259.19	1.12437	259.19	1.154198	259.19	-0.04345888	259.19	-0.1101476	259.19	-0.07687423	259.19	-0.09594046	259.19	-0.06193033	259.19	-0.1030022	259.19	-0.05999372	259.19	-0.06504019	259.19	-0.05710908
259.39	1.216182	259.39	1.111861	259.39	1.146403	259.39	1.154044	259.39	1.060669	259.39	1.123181	259.39	1.156929	259.39	-0.04620556	259.39	-0.1083904	259.39	-0.07373257	259.39	-0.09976653	259.39	-0.06165397	259.39	-0.09976808	259.39	-0.06379087	259.39	-0.06282452	259.39	-0.06101574
259.59	1.214985	259.59	1.113255	259.59	1.146336	259.59	1.143521	259.59	1.063317	259.59	1.124673	259.59	1.157303	259.59	-0.04703206	259.59	-0.1123272	259.59	-0.0717525	259.59	-0.1005077	259.59	-0.05992132	259.59	-0.103183	259.59	-0.06338375	259.59	-0.06228327	259.59	-0.05972256
259.79	1.21661	259.79	1.11531	259.79	1.147179	259.79	1.149903	259.79	1.062809	259.79	1.122722	259.79	1.152234	259.79	-0.04523113	259.79	-0.1086438	259.79	-0.07194245	259.79	-0.09978567	259.79	-0.06175571	259.79	-0.1024619	259.79	-0.06145795	259.79	-0.06131375	259.79	-0.06179702
259.99	1.21533	259.99	1.12111	259.99	1.144546	259.99	1.151255	259.99	1.066157	259.99	1.123424	259.99	1.15216	259.99	-0.04702349	259.99	-0.1064465	259.99	-0.07769085	259.99	-0.1006848	259.99	-0.0598563	259.99	-0.09950782	259.99	-0.06154864	259.99	-0.06925205	259.99	-0.06026115
260.19	1.218671	260.19	1.111217	260.19	1.148778	260.19	1.145346	260.19	1.064105	260.19	1.121618	260.19	1.149825	260.19	-0.04485784	260.19	-0.1095722	260.19	-0.07938855	260.19	-0.1003001	260.19	-0.05865017	260.19	-0.103148	260.19	-0.06223333	260.19	-0.06663851	260.19	-0.05982862
260.39	1.221713	260.39	1.119032	260.39	1.145765	260.39	1.149363	260.39	1.063888	260.39	1.123634	260.39	1.155971	260.39	-0.04763664	260.39	-0.1092214	260.39	-0.0690794	260.39	-0.1006971	260.39	-0.05960545	260.39	-0.1056153	260.39	-0.06374375	260.39	-0.06401338	260.39	-0.05831617
260.59	1.216062	260.59	1.117527	260.59	1.14536	260.59	1.151891	260.59	1.063642	260.59	1.125629	260.59	1.155949	260.59	-0.03788394	260.59	-0.1061356	260.59	-0.07378193	260.59	-0.09680036	260.59	-0.06256953	260.59	-0.09740716	260.59	-0.05675694	260.59	-0.06260625	260.59	-0.05906427
260.79	1.217514	260.79	1.119109	260.79	1.148714	260.79	1.151867	260.79	1.064347	260.79	1.119104	260.79	1.150384	260.79	-0.0420815	260.79	-0.1129167	260.79	-0.07209782	260.79	-0.1007306	260.79	-0.0628282	260.79	-0.1014675	260.79	-0.0642658	260.79	-0.06245266	260.79	-0.0573452
260.99	1.212362	260.99	1.117601	260.99	1.145164	260.99	1.154301	260.99	1.063767	260.99	1.12043	260.99	1.152545	260.99	-0.04558254	260.99	-0.1074599	260.99	-0.07117592	260.99	-0.09796494	260.99	-0.06080037	260.99	-0.1038663	260.99	-0.06521542	260.99	-0.06209952	260.99	-0.06312202
261.19	1.219583	261.19	1.114778	261.19	1.147946	261.19	1.152592	261.19	1.066044	261.19	1.123376	261.19	1.153629	261.19	-0.04193394	261.19	-0.1119442	261.19	-0.07124943	261.19	-0.09782384	261.19	-0.06020842	261.19	-0.1016143	261.19	-0.0610108	261.19	-0.06548747	261.19	-0.0568195
261.39	1.214272	261.39	1.121642	261.39	1.145001	261.39	1.148814	261.39	1.065451	261.39	1.125873	261.39	1.156921	261.39	-0.04586032	261.39	-0.1080234	261.39	-0.07514681	261.39	-0.1002896	261.39	-0.06465901	261.39	-0.104674	261.39	-0.06013313	261.39	-0.06361712	261.39	-0.05870681
261.59	1.212793	261.59	1.119075	261.59	1.146966	261.59	1.149969	261.59	1.059555	261.59	1.122923	261.59	1.152716	261.59	-0.04269826	261.59	-0.1100477	261.59	-0.07562745	261.59	-0.1000369	261.59	-0.06047474	261.59	-0.106587	261.59	-0.06008955	261.59	-0.06316561	261.59	-0.05618415
261.79	1.217766	261.79	1.115981	261.79	1.1477	261.79	1.152714	261.79	1.060912	261.79	1.125236	261.79	1.155499	261.79	-0.04599268	261.79	-0.1106736	261.79	-0.07427159	261.79	-0.1026478	261.79	-0.0579659	261.79	-0.1047475	261.79	-0.05818946	261.79	-0.06418368	261.79	-0.06194866
261.99	1.218342	261.99	1.115808	261.99	1.145253	261.99	1.148908	261.99	1.067406	261.99	1.123893	261.99	1.153821	261.99	-0.03915361	262	-0.1076736	262	-0.07858388	262	-0.09942482	262	-0.0622605	262	-0.1028052	262	-0.06402214	262	-0.05970132	262	-0.06379899
262.19	1.21868	262.19	1.114433	262.19	1.146457	262.19	1.154372	262.19	1.062548	262.19	1.123796	262.19	1.154147	262.19	-0.0404521	262.19	-0.1083426	262.19	-0.07461382	262.19	-0.09946199	262.19	-0.06435861	262.19	-0.1012504	262.19	-0.05873032	262.19	-0.06276157	262.19	-0.06019765
262.39	1.221023	262.39	1.116459	262.39	1.14659	262.39	1.156685	262.39	1.066728	262.39	1.120655	262.39	1.15702	262.39	-0.04478974	262.39	-0.1118491	262.39	-0.0772098	262.39	-0.1020475	262.39	-0.06445665	262.39	-0.09689465	262.39	-0.06526998	262.39	-0.06470655	262.39	-0.06090769
262.59	1.218751	262.59	1.116406	262.59	1.147317	262.59	1.147128	262.59	1.061511	262.59	1.122538	262.59	1.15306	262.59	-0.03985873	262.59	-0.1102237	262.59	-0.07264344	262.59	-0.1051082	262.59	-0.05548142	262.59	-0.1008181	262.59	-0.05470031	262.59	-0.06381933	262.59	-0.05792601
262.79	1.216997	262.79	1.120368	262.79	1.149117	262.79	1.1537	262.79	1.064397	262.79	1.123748	262.79	1.158346	262.79	-0.0405484	262.79	-0.1100717	262.79	-0.06963976	262.79	-0.1019972	262.79	-0.05842368	262.79	-0.09736469	262.79	-0.06095373	262.79	-0.06308594	262.79	-0.05962379
262.99	1.217018	262.99	1.118563	262.99	1.144667	262.99	1.148198	262.99	1.070172	262.99	1.124237	262.99	1.155527	262.99	-0.04129671	262.99	-0.1125048	262.99	-0.07347777	262.99	-0.09982664	262.99	-0.06344499	262.99	-0.1017551	262.99	-0.05529201	262.99	-0.06077877	262.99	-0.05709772
263.19	1.227588	263.19	1.119844	263.19	1.148296	263.19	1.15644	263.19	1.068251	263.19	1.124069	263.19	1.153981	263.19	-0.04612882	263.19	-0.1124991	263.19	-0.07550032	263.19	-0.09840173	263.19	-0.06207469	263.19	-0.104002	263.19	-0.05798226	263.19	-0.06138195	263.19	-0.05781119
263.39	1.219438	263.39	1.113252	263.39	1.148548	263.39	1.156424	263.39	1.071392	263.39	1.120812	263.39	1.156308	263.39	-0.03669487	263.39	-0.1087619	263.39	-0.07256687	263.39	-0.102271	263.39	-0.06069222	263.39	-0.104474	263.39	-0.0605893	263.39	-0.06609108	263.39	-0.0623644
263.59	1.220767	263.59	1.121377	263.59	1.14698	263.59	1.155258	263.59	1.068388	263.59	1.127138	263.59	1.156006	263.59	-0.03619904	263.59	-0.1086743	263.59	-0.07718933	263.59	-0.0994523	263.59	-0.05732804	263.59	-0.09905061	263.59	-0.05968122	263.59	-0.0642321	263.59	-0.05932471
263.79	1.218925	263.79	1.115891	263.79	1.14665	263.79	1.15298	263.79	1.072569	263.79	1.129515	263.79	1.156734	263.79	-0.03748136	263.79	-0.1100477	263.79	-0.07038764	263.79	-0.1075669	263.79	-0.058617	263.79	-0.09682306	263.79	-0.06040371	263.79	-0.0615754	263.79	-0.06135321
263.99	1.217125	263.99	1.113876	263.99	1.149458	263.99	1.152561	263.99	1.068231	263.99	1.122501	263.99	1.152469	263.99	-0.04509436	263.99	-0.1133677	263.99	-0.0718278	263.99	-0.1005697	263.99	-0.06175196	263.99	-0.105624	263.99	-0.06091752	263.99	-0.06080147	263.99	-0.05703421
264.19	1.225276	264.19	1.119997	264.19	1.151707	264.19	1.153359	264.19	1.069739	264.19	1.123356	264.19	1.155561	264.19	-0.03989603	264.19	-0.1074541	264.19	-0.07358521	264.19	-0.09491501	264.19	-0.06057632	264.19	-0.1022499	264.19	-0.06256217	264.19	-0.06315243	264.19	-0.05894113
264.39	1.223165	264.39	1.122896	264.39	1.152791	264.39	1.154127	264.39	1.069689	264.39	1.119684	264.39	1.158565	264.39	-0.04140755	264.39	-0.1085381	264.39	-0.07572249	264.39	-0.09674657	264.39	-0.05761158	264.39	-0.1023788	264.39	-0.06021991	264.39	-0.06420051	264.39	-0.05686198
264.59	1.217659	264.59	1.118719	264.59	1.150752	264.59	1.153209	264.59	1.06637	264.59	1.124609	264.59	1.151546	264.59	-0.04394246	264.59	-0.1061486	264.59	-0.07319798	264.59	-0.1009394	264.59	-0.05828525	264.59	-0.1010504	264.59	-0.06355245	264.59	-0.06057055	264.59	-0.05707172
264.79	1.224079	264.79	1.113006	264.79	1.148538	264.79	1.154449	264.79	1.064462	264.79	1.125009	264.79	1.157072	264.79	-0.03527449	264.79	-0.1059454	264.79	-0.07253306	264.79	-0.09646828	264.79	-0.05776146	264.79	-0.1018948	264.79	-0.06157809	264.79	-0.06266434	264.79	-0.05140415
264.99	1.224185	264.99	1.121073	264.99	1.153339	264.99	1.156888	264.99	1.068875	264.99	1.127077	264.99	1.158946	264.99	-0.0441734	264.99	-0.1082907	264.99	-0.0723084	264.99	-0.09971523	264.99	-0.06184373	264.99	-0.09860192	264.99	-0.06072176	264.99	-0.06319688	264.99	-0.05745886
265.19	1.219052	265.19	1.120166	265.19	1.148701	265.19	1.155059	265.19	1.069913	265.19	1.124734	265.19	1.152878	265.19	-0.04191	265.19	-0.107825	265.19	-0.07038995	265.19	-0.09880872	265.19	-0.05697767	265.19	-0.1008892	265.19	-0.06127176	265.19	-0.06160683	265.19	-0.05626076
265.39	1.22411	265.39	1.113695	265.39	1.155998	265.39	1.149855	265.39	1.064643	265.39	1.12379	265.39	1.157217	265.39	-0.03717009	265.39	-0.1048167	265.39	-0.07224056	265.39	-0.09872784	265.39	-0.0623467	265.39	-0.09701219	265.39	-0.0657386	265.39	-0.06294621	265.39	-0.05701576
265.59	1.221165	265.59	1.117461	265.59	1.150531	265.59	1.162643	265.59	1.066935	265.59	1.125248	265.59	1.152757	265.59	-0.03904197	265.59	-0.109919	265.59	-0.07476018	265.59	-0.1015513	265.59	-0.05574281	265.59	-0.1014751	265.59	-0.05675878	265.59	-0.06139969	265.59	-0.05970915
265.79	1.22213	265.79	1.118345	265.79	1.152757	265.79	1.152533	265.79	1.066227	265.79	1.122348	265.79	1.161125	265.79	-0.04259393	265.79	-0.1137179	265.79	-0.07423751	265.79	-0.09900162	265.79	-0.05805269	265.79	-0.09999339	265.79	-0.06032468	265.79	-0.05881577	265.79	-0.06012546
265.99	1.22045	265.99	1.121004	265.99	1.153173	265.99	1.158811	265.99	1.067234	265.99	1.126095	265.99	1.155995	265.99	-0.04322748	265.99	-0.1080443	265.99	-0.07611032	265.99	-0.0990281	265.99	-0.0580454	265.99	-0.09883499	265.99	-0.05822248	265.99	-0.06149066	265.99	-0.05357835
266.19	1.216901	266.19	1.119727	266.19	1.154313	266.19	1.155271	266.19	1.070304	266.19	1.12851	266.19	1.159131	266.19	-0.04470055	266.19	-0.1081801	266.19	-0.07428311	266.19	-0.1010089	266.19	-0.06162426	266.19	-0.09903736	266.19	-0.05534644	266.19	-0.05980653	266.19	-0.05528336
266.4	1.22588	266.4	1.114117	266.4	1.151257	266.4	1.15152	266.4	1.064575	266.4	1.123097	266.4	1.15555	266.4	-0.03833078	266.39	-0.1095065	266.39	-0.07749773	266.39	-0.09991252	266.39	-0.0592415	266.39	-0.1005928	266.39	-0.05870749	266.39	-0.05957459	266.39	-0.05488073
266.59	1.222677	266.59	1.118722	266.59	1.147986	266.59	1.154179	266.59	1.068191	266.59	1.127196	266.59	1.156584	266.59	-0.04344948	266.6	-0.110443	266.6	-0.07083177	266.6	-0.09528681	266.6	-0.05709982	266.6	-0.1016783	266.6	-0.0569624	266.6	-0.06529311	266.6	-0.05732755
266.79	1.227023	266.79	1.123742	266.79	1.151649	266.79	1.155639	266.79	1.068477	266.79	1.124424	266.79	1.159859	266.79	-0.04411415	266.79	-0.107374	266.79	-0.07231758	266.79	-0.09684119	266.79	-0.06419507	266.79	-0.1019884	266.79	-0.05417054	266.79	-0.05818582	266.79	-0.05893396
266.99	1.223221	266.99	1.122579	266.99	1.148668	266.99	1.151577	266.99	1.070964	266.99	1.125906	266.99	1.157691	266.99	-0.04409692	266.99	-0.1144777	266.99	-0.0718091	266.99	-0.1010067	266.99	-0.05997116	266.99	-0.09801554	266.99	-0.05720319	266.99	-0.06007096	266.99	-0.05379075
267.19	1.221575	267.19	1.118887	267.19	1.150833	267.19	1.160842	267.19	1.066149	267.19	1.124687	267.19	1.15591	267.19	-0.03935892	267.19	-0.1041798	267.19	-0.06898835	267.19	-0.09675536	267.19	-0.06014399	267.19	-0.1055328	267.19	-0.06361999	267.19	-0.06057889	267.19	-0.05796248
267.39	1.222482	267.39	1.122036	267.39	1.151708	267.39	1.15222	267.39	1.06884	267.39	1.129079	267.39	1.15965	267.39	-0.0387117	267.39	-0.1061969	267.39	-0.07534998	267.39	-0.09366382	267.39	-0.0568605	267.39	-0.09860013	267.39	-0.05879984	267.39	-0.05621471	267.39	-0.06095009
267.59	1.23021	267.59	1.123855	267.59	1.150025	267.59	1.152887	267.59	1.06733	267.59	1.124852	267.59	1.157844	267.59	-0.03913706	267.59	-0.1051601	267.59	-0.07230256	267.59	-0.09558456	267.59	-0.05708216	267.59	-0.09917497	267.59	-0.0584441	267.59	-0.05813061	267.59	-0.05798255
267.79	1.223714	267.79	1.124927	267.79	1.152529	267.79	1.151166	267.79	1.06886	267.79	1.127279	267.79	1.155901	267.79	-0.04103238	267.79	-0.1102548	267.79	-0.07114007	267.79	-0.09911406	267.79	-0.05857791	267.79	-0.09823851	267.79	-0.05873968	267.79	-0.06207837	267.79	-0.05544116
267.99	1.227455	267.99	1.120239	267.99	1.153825	267.99	1.153692	267.99	1.07028	267.99	1.126545	267.99	1.156095	267.99	-0.03967591	267.99	-0.105885	267.99	-0.07040726	267.99	-0.09841938	267.99	-0.05645451	267.99	-0.1002063	267.99	-0.0547137	267.99	-0.05616906	267.99	-0.05582187
268.19	1.222982	268.19	1.124439	268.19	1.152894	268.19	1.158884	268.19	1.072577	268.19	1.125445	268.19	1.162617	268.19	-0.04185697	268.19	-0.1061868	268.19	-0.0746429	268.19	-0.09988146	268.19	-0.05774552	268.19	-0.0968479	268.19	-0.0640369	268.19	-0.06134345	268.19	-0.05863529
268.39	1.223312	268.39	1.121324	268.39	1.152881	268.39	1.152745	268.39	1.068872	268.39	1.12543	268.39	1.158435	268.39	-0.03910514	268.39	-0.106319	268.39	-0.07163472	268.39	-0.09956359	268.39	-0.05477191	268.39	-0.1012783	268.39	-0.06215922	268.39	-0.05671107	268.39	-0.05982134
268.59	1.223559	268.59	1.120363	268.59	1.150225	268.59	1.157577	268.59	1.071421	268.59	1.129171	268.59	1.152416	268.59	-0.03758057	268.59	-0.102284	268.59	-0.07067782	268.59	-0.09699903	268.59	-0.05841165	268.59	-0.09996085	268.59	-0.05666459	268.59	-0.0607671	268.59	-0.05505745
268.79	1.230373	268.79	1.121023	268.79	1.156763	268.79	1.156359	268.79	1.071153	268.79	1.125272	268.79	1.156427	268.79	-0.0405372	268.79	-0.1080187	268.79	-0.07350916	268.79	-0.09867256	268.79	-0.05899236	268.79	-0.09826708	268.79	-0.05995296	268.79	-0.05905067	268.79	-0.05733654
268.99	1.229643	268.99	1.119298	268.99	1.156962	268.99	1.163298	268.99	1.071983	268.99	1.127502	268.99	1.157937	268.99	-0.03739267	268.99	-0.1020371	268.99	-0.07250218	268.99	-0.0998229	268.99	-0.05587281	268.99	-0.09997315	268.99	-0.06295947	268.99	-0.06317516	268.99	-0.05440314
269.19	1.225002	269.19	1.12496	269.19	1.155987	269.19	1.159351	269.19	1.075899	269.19	1.128389	269.19	1.155957	269.19	-0.03735974	269.19	-0.1052761	269.19	-0.07343195	269.19	-0.09980042	269.19	-0.05858206	269.19	-0.09531471	269.19	-0.05908792	269.19	-0.06157454	269.19	-0.0587505
269.39	1.228516	269.39	1.122988	269.39	1.152115	269.39	1.164378	269.39	1.071167	269.39	1.130916	269.39	1.150244	269.39	-0.04030788	269.39	-0.1073009	269.39	-0.07121406	269.39	-0.1015498	269.39	-0.05704385	269.39	-0.09666068	269.39	-0.05832348	269.39	-0.06176148	269.39	-0.05994062
269.59	1.224969	269.59	1.127289	269.59	1.154169	269.59	1.157145	269.59	1.072314	269.59	1.12911	269.59	1.160647	269.59	-0.03811456	269.62	-0.1043209	269.62	-0.06919893	269.62	-0.10197	269.62	-0.05350983	269.62	-0.09841477	269.62	-0.05887512	269.62	-0.06199888	269.62	-0.05556765
269.79	1.225429	269.79	1.124955	269.79	1.155438	269.79	1.157949	269.79	1.071446	269.79	1.130508	269.79	1.156461	269.79	-0.0449545	269.79	-0.1064321	269.79	-0.07059214	269.79	-0.09540068	269.79	-0.05852372	269.79	-0.09806708	269.79	-0.05804328	269.79	-0.06351855	269.79	-0.06185533
269.99	1.229131	269.99	1.1252	269.99	1.154996	269.99	1.158578	269.99	1.072788	269.99	1.12752	269.99	1.161489	269.99	-0.04124934	269.99	-0.1057113	269.99	-0.07142625	269.99	-0.09811052	269.99	-0.05785243	269.99	-0.09703412	269.99	-0.06038384	269.99	-0.06088694	269.99	-0.05644093
270.19	1.222209	270.19	1.121795	270.19	1.156807	270.19	1.157058	270.19	1.074017	270.19	1.12963	270.19	1.158589	270.19	-0.03564285	270.19	-0.1026858	270.19	-0.07346125	270.19	-0.09819669	270.19	-0.05636524	270.19	-0.09988273	270.19	-0.05551961	270.19	-0.05951433	270.19	-0.05681065
270.39	1.224096	270.39	1.117138	270.39	1.155234	270.39	1.156252	270.39	1.073913	270.39	1.127999	270.39	1.159483	270.39	-0.04082385	270.39	-0.09991948	270.39	-0.07182157	270.39	-0.0935527	270.39	-0.05695488	270.39	-0.09986661	270.39	-0.05876313	270.39	-0.0562551	270.39	-0.05980321
270.59	1.22644	270.59	1.124131	270.59	1.156249	270.59	1.157678	270.59	1.070547	270.59	1.128578	270.59	1.158019	270.59	-0.0410429	270.59	-0.108551	270.59	-0.07164366	270.59	-0.100163	270.59	-0.05495527	270.59	-0.09615332	270.59	-0.06183507	270.59	-0.06159816	270.59	-0.0577299
270.79	1.226609	270.79	1.125912	270.79	1.158865	270.79	1.155511	270.79	1.069978	270.79	1.127459	270.79	1.159923	270.79	-0.03873223	270.79	-0.1088107	270.79	-0.07184216	270.79	-0.1000057	270.79	-0.06048418	270.79	-0.1000518	270.79	-0.06285589	270.79	-0.05711667	270.79	-0.05839067
270.99	1.230085	270.99	1.125496	270.99	1.155052	270.99	1.163747	270.99	1.072784	270.99	1.127001	270.99	1.161266	270.99	-0.033767	270.99	-0.1052745	270.99	-0.07193576	270.99	-0.09270764	270.99	-0.05642101	270.99	-0.1007119	270.99	-0.05613686	270.99	-0.06074111	270.99	-0.05767711
271.19	1.227474	271.19	1.120401	271.19	1.154312	271.19	1.158034	271.19	1.075472	271.19	1.125527	271.19	1.159664	271.19	-0.03873977	271.19	-0.1035933	271.19	-0.06955488	271.19	-0.09864721	271.19	-0.05468024	271.19	-0.09454268	271.19	-0.053725	271.19	-0.0570572	271.19	-0.05791727
271.39	1.228151	271.39	1.126192	271.39	1.154493	271.39	1.163342	271.39	1.06899	271.39	1.130191	271.39	1.161943	271.39	-0.03875097	271.39	-0.1027992	271.39	-0.06802274	271.39	-0.09339868	271.39	-0.05604174	271.39	-0.09531535	271.39	-0.05694165	271.39	-0.05627627	271.39	-0.05491879
271.59	1.228338	271.59	1.120697	271.59	1.153069	271.59	1.160243	271.59	1.070425	271.59	1.12117	271.59	1.160372	271.59	-0.04006398	271.59	-0.1056401	271.59	-0.07052213	271.59	-0.09378379	271.59	-0.05662356	271.59	-0.09869584	271.59	-0.06057798	271.59	-0.05625115	271.59	-0.0525212
271.79	1.227914	271.79	1.121607	271.79	1.154621	271.79	1.159145	271.79	1.071303	271.79	1.127748	271.79	1.161178	271.79	-0.04354607	271.79	-0.1034101	271.79	-0.06951642	271.79	-0.09327141	271.79	-0.05518908	271.79	-0.0966332	271.79	-0.05532536	271.79	-0.0595892	271.79	-0.05231312
271.99	1.228545	271.99	1.11883	271.99	1.157978	271.99	1.162189	271.99	1.074469	271.99	1.130231	271.99	1.162399	271.99	-0.03679109	271.99	-0.1036554	271.99	-0.06567878	271.99	-0.09701107	271.99	-0.0576089	271.99	-0.09875865	271.99	-0.05901376	271.99	-0.0572129	271.99	-0.05603765
272.19	1.22481	272.19	1.127482	272.19	1.158126	272.19	1.159919	272.19	1.066574	272.19	1.129592	272.19	1.160121	272.19	-0.03747128	272.19	-0.1052417	272.19	-0.0698278	272.19	-0.09253787	272.19	-0.05543133	272.19	-0.1000164	272.19	-0.06056468	272.19	-0.06167163	272.19	-0.05480254
272.39	1.230743	272.39	1.126481	272.39	1.156482	272.39	1.16429	272.39	1.073721	272.39	1.130744	272.39	1.161656	272.39	-0.03726875	272.39	-0.1049274	272.39	-0.06538462	272.39	-0.0974269	272.39	-0.05459505	272.39	-0.09890503	272.39	-0.05556381	272.39	-0.06177347	272.39	-0.05444604
272.59	1.227597	272.59	1.125457	272.59	1.156045	272.59	1.159098	272.59	1.076274	272.59	1.129768	272.59	1.156823	272.59	-0.03816394	272.59	-0.1030055	272.59	-0.06957965	272.59	-0.09384643	272.59	-0.05637379	272.59	-0.09945966	272.59	-0.05612407	272.59	-0.06018645	272.59	-0.05332564
272.79	1.230113	272.79	1.126518	272.79	1.155689	272.79	1.156116	272.79	1.073046	272.79	1.130675	272.79	1.159992	272.79	-0.03761924	272.79	-0.1032907	272.79	-0.06942604	272.79	-0.1004357	272.79	-0.05799804	272.79	-0.09774415	272.79	-0.06156716	272.79	-0.05852133	272.79	-0.05538381
272.99	1.228399	272.99	1.128517	272.99	1.158107	272.99	1.157202	272.99	1.072938	272.99	1.129656	272.99	1.160578	272.99	-0.0410762	272.99	-0.1067357	272.99	-0.06957243	272.99	-0.09672967	272.99	-0.05465393	272.99	-0.09573928	272.99	-0.05968988	272.99	-0.05843131	272.99	-0.05468387
273.19	1.227525	273.19	1.128648	273.19	1.152304	273.19	1.163966	273.19	1.075032	273.19	1.132312	273.19	1.164342	273.19	-0.03549844	273.19	-0.108783	273.19	-0.06864402	273.19	-0.09918509	273.19	-0.0581454	273.19	-0.09781832	273.19	-0.05433507	273.19	-0.05760346	273.19	-0.05639188
273.39	1.229942	273.39	1.124455	273.39	1.157839	273.39	1.160142	273.39	1.072949	273.39	1.135034	273.39	1.157614	273.39	-0.03386352	273.39	-0.1012585	273.39	-0.06600107	273.39	-0.09760113	273.39	-0.05267523	273.39	-0.0962597	273.39	-0.05167475	273.39	-0.05900114	273.39	-0.05104005
273.59	1.233305	273.59	1.130559	273.59	1.155271	273.59	1.16044	273.59	1.070509	273.59	1.13191	273.59	1.159161	273.59	-0.03407424	273.59	-0.1042055	273.59	-0.06682239	273.59	-0.09401688	273.59	-0.05554458	273.59	-0.09513236	273.59	-0.05720111	273.59	-0.05679608	273.59	-0.05009319
273.79	1.228289	273.79	1.128337	273.79	1.154409	273.79	1.159817	273.79	1.077534	273.79	1.127935	273.79	1.15855	273.79	-0.03834071	273.79	-0.1061747	273.79	-0.06920562	273.79	-0.09752987	273.79	-0.05475081	273.79	-0.09514345	273.79	-0.05798358	273.79	-0.06011662	273.79	-0.0525383
273.99	1.224559	273.99	1.125369	273.99	1.157241	273.99	1.160282	273.99	1.079203	273.99	1.1309	273.99	1.162595	273.99	-0.03907278	273.99	-0.1027371	273.99	-0.07204648	273.99	-0.09416431	273.99	-0.05692564	273.99	-0.09863593	273.99	-0.05613152	273.99	-0.05639574	273.99	-0.05888929
274.19	1.229239	274.19	1.129817	274.19	1.15509	274.19	1.16386	274.19	1.072704	274.19	1.130659	274.19	1.163684	274.19	-0.04037338	274.19	-0.1046476	274.19	-0.06891384	274.19	-0.09946356	274.19	-0.05220181	274.19	-0.09568017	274.19	-0.05175387	274.19	-0.05274859	274.19	-0.04964303
274.39	1.232334	274.39	1.126726	274.39	1.160873	274.39	1.164035	274.39	1.069631	274.39	1.126039	274.39	1.156651	274.39	-0.03761205	274.39	-0.1101059	274.39	-0.0705502	274.39	-0.09834334	274.39	-0.0557098	274.39	-0.09783883	274.39	-0.05349474	274.39	-0.05524943	274.39	-0.05395067
274.59	1.231893	274.59	1.131194	274.59	1.156308	274.59	1.159306	274.59	1.076454	274.59	1.132043	274.59	1.166066	274.59	-0.03858237	274.59	-0.10296	274.59	-0.06965645	274.59	-0.09554316	274.59	-0.05447572	274.59	-0.09071364	274.59	-0.05679379	274.59	-0.05914002	274.59	-0.05481596
274.79	1.231302	274.79	1.121784	274.79	1.158348	274.79	1.161434	274.79	1.079115	274.79	1.132083	274.79	1.160778	274.79	-0.03617143	274.79	-0.107234	274.79	-0.0682823	274.79	-0.09239497	274.79	-0.05380993	274.79	-0.09735354	274.79	-0.05192969	274.79	-0.05755999	274.79	-0.05119739
274.99	1.230801	274.99	1.125016	274.99	1.159356	274.99	1.1675	274.99	1.08174	274.99	1.130579	274.99	1.161398	274.99	-0.03453662	274.99	-0.1047899	274.99	-0.06556186	274.99	-0.09513536	274.99	-0.05394216	274.99	-0.09448417	274.99	-0.06223252	274.99	-0.05882924	274.99	-0.05821927
275.19	1.225625	275.19	1.125579	275.19	1.155913	275.19	1.163911	275.19	1.070481	275.19	1.129952	275.19	1.166986	275.19	-0.03589356	275.2	-0.09808541	275.2	-0.06813785	275.2	-0.09369812	275.2	-0.05250473	275.2	-0.09891443	275.2	-0.05806474	275.2	-0.05548332	275.2	-0.05926292
275.39	1.234833	275.39	1.124611	275.39	1.160752	275.39	1.165214	275.39	1.071565	275.39	1.130627	275.39	1.163089	275.39	-0.03715511	275.39	-0.1047556	275.39	-0.06823219	275.39	-0.0911672	275.39	-0.05774216	275.39	-0.09942442	275.39	-0.05886424	275.39	-0.05148018	275.39	-0.06057319
275.59	1.229343	275.59	1.130369	275.59	1.156627	275.59	1.16141	275.59	1.074895	275.59	1.13231	275.59	1.159189	275.59	-0.03809462	275.59	-0.1031066	275.59	-0.07020315	275.59	-0.09905273	275.59	-0.0533484	275.59	-0.0977622	275.59	-0.05551654	275.59	-0.05445998	275.59	-0.05588679
275.79	1.229627	275.79	1.132397	275.79	1.158043	275.79	1.165337	275.79	1.071593	275.79	1.128082	275.79	1.159375	275.79	-0.03278724	275.79	-0.1035769	275.79	-0.07020108	275.79	-0.09596969	275.79	-0.05967351	275.79	-0.09448252	275.79	-0.06084491	275.79	-0.05615146	275.79	-0.05546618
276.01	1.232743	276.01	1.130066	276.01	1.158467	276.01	1.167246	276.01	1.076244	276.01	1.131178	276.01	1.16506	276.01	-0.03286118	275.99	-0.09894999	275.99	-0.06981665	275.99	-0.09203058	275.99	-0.05991951	275.99	-0.09387488	275.99	-0.0570473	275.99	-0.05696853	275.99	-0.05497183
276.19	1.233483	276.19	1.124696	276.19	1.15978	276.19	1.160618	276.19	1.072013	276.19	1.133889	276.19	1.166528	276.19	-0.03610302	276.19	-0.1018888	276.19	-0.07162299	276.19	-0.09556239	276.19	-0.05550466	276.19	-0.09861519	276.19	-0.05025448	276.19	-0.06070206	276.19	-0.05313531
276.39	1.226017	276.39	1.130267	276.39	1.159016	276.39	1.167296	276.39	1.079241	276.39	1.135885	276.39	1.162704	276.39	-0.0333547	276.39	-0.1006407	276.39	-0.0726558	276.39	-0.09277949	276.39	-0.05516962	276.39	-0.09647288	276.39	-0.0550271	276.39	-0.05714087	276.39	-0.05328193
276.59	1.23107	276.59	1.126166	276.59	1.164118	276.59	1.164731	276.59	1.076192	276.59	1.134922	276.59	1.164784	276.59	-0.03485816	276.59	-0.1067016	276.59	-0.07345591	276.59	-0.09367537	276.59	-0.05795148	276.59	-0.09693781	276.59	-0.05768798	276.59	-0.06007088	276.59	-0.05413047
276.79	1.232745	276.79	1.130914	276.79	1.156855	276.79	1.164104	276.79	1.07262	276.79	1.135742	276.79	1.163206	276.79	-0.03931604	276.79	-0.1067173	276.79	-0.06648763	276.79	-0.09227441	276.79	-0.05343708	276.79	-0.09555577	276.79	-0.0588339	276.79	-0.05539305	276.79	-0.0553175
276.99	1.232337	276.99	1.129598	276.99	1.162263	276.99	1.162892	276.99	1.076323	276.99	1.127432	276.99	1.168912	276.99	-0.03732668	276.99	-0.1021558	276.99	-0.07050224	276.99	-0.09576883	276.99	-0.05524665	276.99	-0.09763817	276.99	-0.05265803	276.99	-0.0539037	276.99	-0.05250602
277.19	1.237831	277.19	1.12667	277.19	1.15802	277.19	1.16061	277.19	1.078398	277.19	1.13414	277.19	1.165098	277.19	-0.03398199	277.19	-0.1018977	277.19	-0.06854066	277.19	-0.09488166	277.19	-0.05402088	277.19	-0.0990891	277.19	-0.05390091	277.19	-0.05601613	277.19	-0.05098911
277.39	1.234082	277.39	1.12903	277.39	1.160836	277.39	1.164209	277.39	1.069984	277.39	1.13498	277.39	1.160955	277.39	-0.03797464	277.39	-0.1033465	277.39	-0.06824887	277.39	-0.09729067	277.39	-0.05941643	277.39	-0.0967878	277.39	-0.05264892	277.39	-0.05064736	277.39	-0.05286298
277.59	1.233917	277.59	1.128827	277.59	1.16211	277.59	1.161918	277.59	1.077718	277.59	1.129722	277.59	1.163725	277.59	-0.03741624	277.59	-0.1011956	277.59	-0.07181495	277.59	-0.09634437	277.59	-0.05566426	277.59	-0.09496766	277.59	-0.05326751	277.59	-0.05700637	277.59	-0.05393954
277.79	1.235475	277.79	1.127555	277.79	1.160728	277.79	1.163522	277.79	1.07737	277.79	1.134382	277.79	1.165531	277.79	-0.03866852	277.79	-0.09933501	277.79	-0.06971294	277.79	-0.09634313	277.79	-0.05638386	277.79	-0.09580021	277.79	-0.0566348	277.79	-0.05513946	277.79	-0.05562091
277.99	1.232347	277.99	1.129036	277.99	1.163113	277.99	1.167989	277.99	1.074117	277.99	1.137895	277.99	1.16547	277.99	-0.0372752	277.99	-0.1026476	277.99	-0.06972376	277.99	-0.09435351	277.99	-0.05582645	277.99	-0.09512959	277.99	-0.05363179	277.99	-0.05831845	277.99	-0.05271335
278.19	1.232153	278.19	1.126044	278.19	1.161994	278.19	1.163813	278.19	1.076751	278.19	1.133183	278.19	1.164232	278.19	-0.03687988	278.2	-0.1005911	278.2	-0.06606932	278.2	-0.09588482	278.2	-0.05599715	278.2	-0.09641352	278.2	-0.05279331	278.2	-0.05288046	278.2	-0.05346491
278.39	1.233076	278.39	1.130851	278.39	1.160617	278.39	1.165558	278.39	1.072116	278.39	1.137462	278.39	1.167974	278.39	-0.03567529	278.39	-0.09792906	278.39	-0.06671167	278.39	-0.09247121	278.39	-0.0526756	278.39	-0.09402946	278.39	-0.05663813	278.39	-0.05419857	278.39	-0.05130026
278.6	1.234328	278.6	1.129662	278.6	1.160166	278.6	1.16225	278.6	1.077311	278.6	1.134883	278.6	1.165626	278.6	-0.03649326	278.59	-0.1001956	278.59	-0.06876738	278.59	-0.09770752	278.59	-0.05225141	278.59	-0.09295915	278.59	-0.05687603	278.59	-0.05485479	278.59	-0.04821547
278.79	1.233131	278.79	1.129064	278.79	1.163192	278.79	1.164284	278.79	1.077144	278.79	1.12768	278.79	1.164555	278.79	-0.03614258	278.79	-0.1037547	278.79	-0.0685178	278.79	-0.09732815	278.79	-0.05395893	278.79	-0.09499876	278.79	-0.0574004	278.79	-0.06276318	278.79	-0.05290094
278.99	1.23178	278.99	1.131814	278.99	1.165672	278.99	1.1693	278.99	1.079618	278.99	1.134733	278.99	1.164191	278.99	-0.0370295	278.99	-0.09721178	278.99	-0.06745585	278.99	-0.09295382	278.99	-0.05364485	278.99	-0.09626524	278.99	-0.05534415	278.99	-0.0527953	278.99	-0.04882761
279.19	1.233107	279.19	1.12711	279.19	1.163363	279.19	1.168723	279.19	1.077751	279.19	1.129792	279.19	1.165774	279.19	-0.03962842	279.19	-0.09981222	279.19	-0.07010314	279.19	-0.09742215	279.19	-0.05397037	279.19	-0.09626155	279.19	-0.05148046	279.19	-0.05540449	279.19	-0.05607586
279.39	1.235045	279.39	1.130212	279.39	1.162095	279.39	1.167387	279.39	1.078476	279.39	1.136788	279.39	1.166166	279.39	-0.03345861	279.39	-0.1035869	279.39	-0.0680939	279.39	-0.09510735	279.39	-0.05178415	279.39	-0.09632874	279.39	-0.05238892	279.39	-0.05444001	279.39	-0.04998024
279.59	1.236016	279.59	1.133332	279.59	1.160398	279.59	1.164406	279.59	1.080195	279.59	1.137834	279.59	1.165098	279.59	-0.0324421	279.59	-0.1004727	279.59	-0.06934986	279.59	-0.09437967	279.59	-0.05073502	279.59	-0.09716129	279.59	-0.0573544	279.59	-0.05664176	279.59	-0.05346332
279.79	1.233046	279.79	1.132551	279.79	1.158655	279.79	1.163201	279.79	1.076918	279.79	1.136354	279.79	1.163413	279.79	-0.03184554	279.79	-0.09894287	279.79	-0.06915626	279.79	-0.09380788	279.79	-0.05647073	279.79	-0.09554765	279.79	-0.05245157	279.79	-0.05825366	279.79	-0.05159799
279.99	1.231442	279.99	1.131959	279.99	1.161549	279.99	1.168131	279.99	1.0777	279.99	1.138175	279.99	1.162385	279.99	-0.03175465	279.99	-0.1024426	279.99	-0.06455208	279.99	-0.09491723	279.99	-0.05389136	279.99	-0.09661818	279.99	-0.05399835	279.99	-0.05364918	279.99	-0.0505019
280.19	1.234117	280.19	1.131376	280.19	1.164756	280.19	1.165445	280.19	1.073211	280.19	1.137972	280.19	1.159618	280.19	-0.03579587	280.19	-0.09929194	280.19	-0.06459938	280.19	-0.09387072	280.19	-0.05136691	280.19	-0.09705186	280.19	-0.05498154	280.19	-0.05771258	280.19	-0.0545153
280.39	1.230307	280.39	1.130155	280.39	1.16135	280.39	1.172362	280.39	1.074962	280.39	1.140125	280.39	1.162373	280.39	-0.0357476	280.39	-0.1003757	280.39	-0.0619264	280.39	-0.092665	280.39	-0.05157429	280.39	-0.09512299	280.39	-0.05361852	280.39	-0.05745864	280.39	-0.05139334
280.59	1.236917	280.59	1.133496	280.59	1.16559	280.59	1.166042	280.59	1.07801	280.59	1.143848	280.59	1.165948	280.59	-0.03437486	280.59	-0.1058404	280.59	-0.06605282	280.59	-0.09462509	280.59	-0.04987324	280.59	-0.09612155	280.59	-0.0529648	280.59	-0.05891646	280.59	-0.05028081
280.79	1.233383	280.79	1.135448	280.79	1.157749	280.79	1.170838	280.79	1.079043	280.79	1.13626	280.79	1.171035	280.79	-0.03487875	280.79	-0.09253089	280.79	-0.0668136	280.79	-0.09207407	280.79	-0.05093011	280.79	-0.09320401	280.79	-0.05076633	280.79	-0.05543101	280.79	-0.05224508
280.99	1.241153	280.99	1.133874	280.99	1.163592	280.99	1.165714	280.99	1.0817	280.99	1.137212	280.99	1.165116	280.99	-0.02915771	280.99	-0.09867711	280.99	-0.0697858	280.99	-0.09354715	280.99	-0.05702238	280.99	-0.09874713	280.99	-0.05135944	280.99	-0.05211692	280.99	-0.05319345
281.19	1.233485	281.19	1.131564	281.19	1.16516	281.19	1.168109	281.19	1.078953	281.19	1.13771	281.19	1.171441	281.19	-0.03175722	281.19	-0.09884949	281.19	-0.06698232	281.19	-0.0935175	281.19	-0.05209395	281.19	-0.09548873	281.19	-0.05408997	281.19	-0.05498725	281.19	-0.05645524
281.39	1.237699	281.39	1.133022	281.39	1.16057	281.39	1.165341	281.39	1.081801	281.39	1.135107	281.39	1.168379	281.39	-0.02937552	281.39	-0.1003756	281.39	-0.06058663	281.39	-0.09172808	281.39	-0.05399755	281.39	-0.09794717	281.39	-0.05177218	281.39	-0.05953496	281.39	-0.05107899
281.59	1.23515	281.59	1.133857	281.59	1.161738	281.59	1.170065	281.59	1.077494	281.59	1.133714	281.59	1.165956	281.59	-0.03759587	281.59	-0.09714562	281.59	-0.0673781	281.59	-0.09120163	281.59	-0.04936604	281.59	-0.09359056	281.59	-0.05566518	281.59	-0.04953833	281.59	-0.0509847
281.79	1.234236	281.79	1.131304	281.79	1.164017	281.79	1.165825	281.79	1.079538	281.79	1.134548	281.79	1.16914	281.79	-0.03377403	281.79	-0.09991614	281.79	-0.06669838	281.79	-0.09035438	281.79	-0.05417796	281.79	-0.09748665	281.79	-0.05413834	281.79	-0.06073398	281.79	-0.04632904
281.99	1.236691	281.99	1.129879	281.99	1.16263	281.99	1.167293	281.99	1.077332	281.99	1.135088	281.99	1.164159	281.99	-0.03354773	281.99	-0.1003056	281.99	-0.06704067	281.99	-0.08903959	281.99	-0.05289434	281.99	-0.09538694	281.99	-0.0533145	281.99	-0.0563013	281.99	-0.05323722
282.19	1.232879	282.19	1.131386	282.19	1.165194	282.19	1.16791	282.19	1.078604	282.19	1.137129	282.19	1.167986	282.19	-0.0332523	282.19	-0.1002696	282.19	-0.06810099	282.19	-0.09233322	282.19	-0.05097626	282.19	-0.09693336	282.19	-0.05506223	282.19	-0.05381465	282.19	-0.05397325
282.39	1.240074	282.39	1.133983	282.39	1.164042	282.39	1.167141	282.39	1.078435	282.39	1.137235	282.39	1.168942	282.39	-0.03494704	282.39	-0.09991773	282.39	-0.0664698	282.39	-0.0930473	282.39	-0.05121249	282.39	-0.1006364	282.39	-0.05601157	282.39	-0.05268552	282.39	-0.0512835
282.59	1.237728	282.59	1.136269	282.59	1.163264	282.59	1.16877	282.59	1.081848	282.59	1.140556	282.59	1.161469	282.59	-0.02813636	282.59	-0.0977663	282.59	-0.06664586	282.59	-0.09172094	282.59	-0.05482647	282.59	-0.09538779	282.59	-0.05548321	282.59	-0.05592287	282.59	-0.05236815
282.79	1.237509	282.79	1.129668	282.79	1.1641	282.79	1.168785	282.79	1.08167	282.79	1.134385	282.79	1.168718	282.79	-0.02973036	282.79	-0.1031644	282.79	-0.06384607	282.79	-0.09096384	282.79	-0.05236874	282.79	-0.09294183	282.79	-0.05742247	282.79	-0.05144745	282.79	-0.05120477
283	1.235724	283	1.132131	283	1.162609	283	1.170637	283	1.076945	283	1.132357	283	1.163763	283	-0.03595646	282.99	-0.09902363	282.99	-0.06685518	282.99	-0.08626396	282.99	-0.05413355	282.99	-0.09148929	282.99	-0.05481751	282.99	-0.056834	282.99	-0.05612388
283.19	1.238216	283.19	1.13112	283.19	1.166247	283.19	1.169777	283.19	1.081415	283.19	1.140564	283.19	1.164889	283.19	-0.03061516	283.19	-0.1004331	283.19	-0.06568769	283.19	-0.09535418	283.19	-0.05248036	283.19	-0.09590378	283.19	-0.05378955	283.19	-0.05539094	283.19	-0.04842266
283.39	1.235682	283.39	1.134325	283.39	1.165075	283.39	1.167511	283.39	1.079833	283.39	1.13784	283.39	1.171188	283.39	-0.03276268	283.39	-0.1000482	283.39	-0.05998223	283.39	-0.09322698	283.39	-0.05448382	283.39	-0.09755584	283.39	-0.05375978	283.39	-0.05498959	283.39	-0.04790245
283.59	1.237474	283.59	1.13243	283.59	1.163383	283.59	1.165912	283.59	1.074915	283.59	1.141713	283.59	1.169014	283.59	-0.03149955	283.59	-0.1010909	283.59	-0.06475344	283.59	-0.08944383	283.59	-0.0500416	283.59	-0.09181969	283.59	-0.05169604	283.59	-0.05148788	283.59	-0.04622211
283.79	1.237173	283.79	1.135425	283.79	1.162841	283.79	1.16857	283.79	1.081089	283.79	1.137845	283.79	1.17007	283.79	-0.03533512	283.79	-0.09923122	283.79	-0.06394666	283.79	-0.09417629	283.79	-0.04881465	283.79	-0.09495107	283.79	-0.05872934	283.79	-0.05456327	283.79	-0.05061009
283.99	1.239619	283.99	1.136886	283.99	1.166258	283.99	1.171231	283.99	1.079162	283.99	1.141429	283.99	1.169482	283.99	-0.02777295	283.99	-0.09886201	283.99	-0.06636947	283.99	-0.09496714	283.99	-0.05173	283.99	-0.09496761	283.99	-0.05337878	283.99	-0.05394098	283.99	-0.04805116
284.19	1.240266	284.19	1.135654	284.19	1.165176	284.19	1.172379	284.19	1.079759	284.19	1.134833	284.19	1.168942	284.19	-0.03561426	284.19	-0.09970879	284.19	-0.06360057	284.19	-0.09368301	284.19	-0.05050044	284.19	-0.09462339	284.19	-0.05241721	284.19	-0.05081155	284.19	-0.04853101
284.39	1.239728	284.39	1.136421	284.39	1.165237	284.39	1.167881	284.39	1.083447	284.39	1.14058	284.39	1.166838	284.39	-0.03446453	284.39	-0.1023929	284.39	-0.06532175	284.39	-0.09163766	284.39	-0.04586276	284.39	-0.08993098	284.39	-0.05474396	284.39	-0.05191166	284.39	-0.05276957
284.59	1.24222	284.59	1.137992	284.59	1.165352	284.59	1.16963	284.59	1.084691	284.59	1.139321	284.59	1.171106	284.59	-0.03206121	284.59	-0.1003768	284.59	-0.06312207	284.59	-0.09300566	284.59	-0.05032147	284.59	-0.09321234	284.59	-0.05212968	284.59	-0.05463543	284.59	-0.05500345
284.79	1.239951	284.79	1.134833	284.79	1.165717	284.79	1.170678	284.79	1.082723	284.79	1.137027	284.79	1.167106	284.79	-0.03361384	284.79	-0.102861	284.79	-0.06015142	284.79	-0.08835899	284.79	-0.0485188	284.79	-0.09186027	284.79	-0.05517837	284.79	-0.05149712	284.79	-0.0502076
284.99	1.237369	284.99	1.139725	284.99	1.16776	284.99	1.168876	284.99	1.077504	284.99	1.140572	284.99	1.17013	284.99	-0.03377025	284.99	-0.1009481	284.99	-0.06930846	284.99	-0.09185208	284.99	-0.04842235	284.99	-0.09526809	284.99	-0.05337354	284.99	-0.05372722	284.99	-0.04564616
285.19	1.235337	285.19	1.133671	285.19	1.163756	285.19	1.167643	285.19	1.080714	285.19	1.138141	285.19	1.170219	285.19	-0.03047594	285.19	-0.1018749	285.19	-0.064147	285.19	-0.09115443	285.19	-0.04948949	285.19	-0.09377402	285.19	-0.05122591	285.19	-0.0532967	285.19	-0.04999714
285.39	1.242916	285.39	1.134223	285.39	1.168817	285.39	1.169635	285.39	1.07855	285.39	1.134031	285.39	1.172463	285.39	-0.02923876	285.39	-0.09528291	285.39	-0.06507274	285.39	-0.0980141	285.39	-0.05110943	285.39	-0.09982046	285.39	-0.05329507	285.39	-0.05219926	285.39	-0.04749934
285.59	1.241299	285.59	1.134823	285.59	1.166337	285.59	1.168019	285.59	1.083045	285.59	1.137708	285.59	1.173327	285.59	-0.03361046	285.59	-0.09686392	285.59	-0.06524225	285.59	-0.09039493	285.59	-0.05432858	285.59	-0.09215011	285.59	-0.05311729	285.59	-0.05008003	285.59	-0.04984464
285.79	1.242893	285.79	1.133794	285.79	1.166778	285.79	1.171476	285.79	1.085833	285.79	1.142254	285.79	1.167146	285.79	-0.02985298	285.79	-0.1005805	285.79	-0.06307635	285.79	-0.08943786	285.79	-0.05165219	285.79	-0.09475343	285.79	-0.05178371	285.79	-0.05698973	285.79	-0.04545521
285.99	1.239075	285.99	1.133451	285.99	1.165928	285.99	1.172075	285.99	1.081168	285.99	1.140579	285.99	1.169844	285.99	-0.03147339	285.99	-0.09984759	285.99	-0.06472495	285.99	-0.0908375	285.99	-0.04843326	285.99	-0.09321459	285.99	-0.05125016	285.99	-0.05334775	285.99	-0.0524076
286.19	1.242943	286.19	1.132998	286.19	1.167766	286.19	1.171722	286.19	1.081941	286.19	1.140799	286.19	1.167693	286.19	-0.03060167	286.19	-0.1015368	286.19	-0.0621886	286.19	-0.09523544	286.19	-0.04906738	286.19	-0.09454931	286.19	-0.05360231	286.19	-0.05150633	286.19	-0.05011606
286.4	1.246714	286.4	1.13973	286.4	1.171693	286.4	1.171418	286.4	1.084495	286.4	1.138775	286.4	1.166504	286.4	-0.03630627	286.39	-0.09483899	286.39	-0.06252964	286.39	-0.09164559	286.39	-0.05349391	286.39	-0.09515421	286.39	-0.05022563	286.39	-0.05196963	286.39	-0.04901074
286.59	1.238187	286.59	1.136652	286.59	1.16491	286.59	1.170826	286.59	1.077407	286.59	1.145959	286.59	1.167691	286.59	-0.03457261	286.59	-0.0968843	286.59	-0.06355227	286.59	-0.09325086	286.59	-0.05005581	286.59	-0.097403	286.59	-0.05249228	286.59	-0.0542244	286.59	-0.04883677
286.79	1.239068	286.79	1.138759	286.79	1.166745	286.79	1.173358	286.79	1.086778	286.79	1.140608	286.79	1.16952	286.79	-0.03187865	286.79	-0.09931466	286.79	-0.06551299	286.79	-0.09166943	286.79	-0.05185613	286.79	-0.09106584	286.79	-0.05216367	286.79	-0.05538739	286.79	-0.04831404
286.99	1.241974	286.99	1.134295	286.99	1.167489	286.99	1.169565	286.99	1.082455	286.99	1.143405	286.99	1.170401	286.99	-0.02879364	286.99	-0.09528238	286.99	-0.06455459	286.99	-0.09113791	286.99	-0.05115198	286.99	-0.0924366	286.99	-0.05597155	286.99	-0.05290841	286.99	-0.0520695
287.19	1.23874	287.19	1.139826	287.19	1.16453	287.19	1.172738	287.19	1.081527	287.19	1.139479	287.19	1.174691	287.19	-0.02885044	287.19	-0.09971791	287.19	-0.06334564	287.19	-0.09245521	287.19	-0.04639801	287.19	-0.09253711	287.19	-0.04894725	287.19	-0.05135148	287.19	-0.05160832
287.39	1.243397	287.39	1.132641	287.39	1.170092	287.39	1.163624	287.39	1.080241	287.39	1.139929	287.39	1.170757	287.39	-0.0302821	287.39	-0.09756207	287.39	-0.06328349	287.39	-0.08653437	287.39	-0.04693422	287.39	-0.0959646	287.39	-0.05246248	287.39	-0.04923557	287.39	-0.0515976
287.59	1.239903	287.59	1.134347	287.59	1.17176	287.59	1.171691	287.59	1.079772	287.59	1.139378	287.59	1.16735	287.59	-0.03185288	287.59	-0.09864347	287.59	-0.0659389	287.59	-0.09326813	287.59	-0.05077757	287.59	-0.09393959	287.59	-0.05002287	287.59	-0.04641468	287.59	-0.0477117
287.79	1.242424	287.79	1.138682	287.79	1.168532	287.79	1.171068	287.79	1.081456	287.79	1.143039	287.79	1.16853	287.79	-0.02713296	287.79	-0.09455466	287.79	-0.06618127	287.79	-0.09427067	287.79	-0.04992279	287.79	-0.09058423	287.79	-0.05057298	287.79	-0.05266693	287.79	-0.046115
287.99	1.242714	287.99	1.135039	287.99	1.167307	287.99	1.172317	287.99	1.085465	287.99	1.141776	287.99	1.167124	287.99	-0.02984538	287.99	-0.09959114	287.99	-0.06192737	287.99	-0.08823375	287.99	-0.04732143	287.99	-0.09304924	287.99	-0.05384872	287.99	-0.05652482	287.99	-0.05269945
288.19	1.244495	288.19	1.13127	288.19	1.171232	288.19	1.176195	288.19	1.083002	288.19	1.138506	288.19	1.171294	288.19	-0.0334529	288.19	-0.0979198	288.19	-0.06070665	288.19	-0.09003077	288.19	-0.051959	288.19	-0.08843464	288.19	-0.0504537	288.19	-0.05201083	288.19	-0.05097249
288.39	1.240488	288.39	1.134338	288.39	1.168794	288.39	1.169344	288.39	1.08371	288.39	1.139552	288.39	1.170337	288.39	-0.02819721	288.39	-0.09488347	288.39	-0.06200074	288.39	-0.09116143	288.39	-0.04744466	288.39	-0.09211593	288.39	-0.04945685	288.39	-0.0517366	288.39	-0.04816119
288.59	1.241291	288.59	1.137593	288.59	1.168753	288.59	1.172877	288.59	1.079791	288.59	1.141103	288.59	1.168821	288.59	-0.03207691	288.59	-0.09344177	288.59	-0.06327766	288.59	-0.08818971	288.59	-0.04804685	288.59	-0.09188928	288.59	-0.05070155	288.59	-0.05195539	288.59	-0.04822964
288.79	1.241691	288.79	1.13642	288.79	1.169975	288.79	1.176095	288.79	1.089587	288.79	1.14491	288.79	1.170262	288.79	-0.02951996	288.79	-0.0950741	288.79	-0.06201571	288.79	-0.09296551	288.79	-0.04661176	288.79	-0.08892722	288.79	-0.04784388	288.79	-0.05305739	288.79	-0.0489691
288.99	1.24363	288.99	1.135315	288.99	1.167711	288.99	1.173699	288.99	1.08613	288.99	1.140452	288.99	1.167876	288.99	-0.03575584	288.99	-0.09681688	288.99	-0.06341444	288.99	-0.09130264	288.99	-0.05080516	288.99	-0.09183578	288.99	-0.04860301	288.99	-0.05750065	288.99	-0.05012725
289.19	1.243853	289.19	1.134007	289.19	1.166044	289.19	1.174848	289.19	1.082102	289.19	1.141111	289.19	1.167782	289.19	-0.02873697	289.19	-0.09484916	289.19	-0.05971231	289.19	-0.09374373	289.19	-0.05022434	289.19	-0.09112718	289.19	-0.0511904	289.19	-0.04861889	289.19	-0.0447856
289.4	1.242513	289.4	1.138568	289.4	1.173393	289.4	1.172864	289.4	1.083037	289.4	1.139334	289.4	1.169471	289.4	-0.02971416	289.39	-0.0970323	289.39	-0.06411542	289.39	-0.09063374	289.39	-0.04804022	289.39	-0.08889113	289.39	-0.05051412	289.39	-0.05130696	289.39	-0.0508824
289.59	1.24735	289.59	1.140929	289.59	1.167607	289.59	1.172454	289.59	1.085313	289.59	1.142223	289.59	1.171133	289.59	-0.02780423	289.59	-0.09839138	289.59	-0.06514298	289.59	-0.08883933	289.59	-0.04858081	289.59	-0.09475528	289.59	-0.0521429	289.59	-0.05306243	289.59	-0.04960034
289.79	1.244686	289.79	1.138188	289.79	1.171391	289.79	1.173783	289.79	1.080696	289.79	1.139601	289.79	1.173775	289.79	-0.03152808	289.79	-0.09887163	289.79	-0.06513567	289.79	-0.09067105	289.79	-0.04984698	289.79	-0.0935582	289.79	-0.04816592	289.79	-0.05198295	289.79	-0.05101794
289.99	1.241319	289.99	1.139738	289.99	1.166607	289.99	1.174699	289.99	1.082149	289.99	1.141232	289.99	1.17053	289.99	-0.02912743	289.99	-0.09491818	289.99	-0.06394964	289.99	-0.08900105	289.99	-0.05193379	289.99	-0.09115746	289.99	-0.0488679	289.99	-0.05051681	289.99	-0.04656765
290.19	1.244079	290.19	1.135751	290.19	1.17025	290.19	1.175031	290.19	1.086134	290.19	1.146908	290.19	1.167762	290.19	-0.02761086	290.19	-0.09691142	290.19	-0.05964155	290.19	-0.08893216	290.19	-0.0507031	290.19	-0.09143551	290.19	-0.04646667	290.19	-0.05053268	290.19	-0.05023485
290.39	1.244565	290.39	1.142803	290.39	1.171617	290.39	1.173952	290.39	1.084077	290.39	1.144979	290.39	1.167344	290.39	-0.02798751	290.39	-0.09477773	290.39	-0.06496077	290.39	-0.08644986	290.39	-0.04606079	290.39	-0.09213422	290.39	-0.05091809	290.39	-0.05477193	290.39	-0.04725183
290.59	1.244398	290.59	1.141545	290.59	1.170996	290.59	1.181512	290.59	1.0836	290.59	1.141847	290.59	1.17408	290.59	-0.02705491	290.59	-0.09929252	290.59	-0.06304384	290.59	-0.08872247	290.59	-0.0483374	290.59	-0.09242533	290.59	-0.04698668	290.59	-0.05241045	290.59	-0.04665277
290.8	1.242001	290.8	1.132104	290.8	1.164918	290.8	1.17205	290.8	1.083517	290.8	1.142648	290.8	1.169051	290.8	-0.02773767	290.79	-0.09600934	290.79	-0.0572431	290.79	-0.08543181	290.79	-0.0505659	290.79	-0.09152559	290.79	-0.05282501	290.79	-0.05383868	290.79	-0.04820845
290.99	1.243513	290.99	1.139483	290.99	1.171007	290.99	1.177222	290.99	1.081609	290.99	1.145615	290.99	1.172836	290.99	-0.03016362	290.99	-0.0956467	290.99	-0.06356075	290.99	-0.08802701	290.99	-0.05153335	290.99	-0.09386386	290.99	-0.05120225	290.99	-0.05255671	290.99	-0.04914794
291.19	1.247352	291.19	1.138561	291.19	1.171415	291.19	1.172302	291.19	1.081246	291.19	1.138498	291.19	1.169755	291.19	-0.02719452	291.19	-0.09392459	291.19	-0.0620634	291.19	-0.09374639	291.19	-0.04855061	291.19	-0.09132995	291.19	-0.04966217	291.19	-0.04962811	291.19	-0.04783516
291.39	1.244066	291.39	1.135397	291.39	1.170443	291.39	1.170517	291.39	1.082072	291.39	1.143543	291.39	1.167299	291.39	-0.027641	291.39	-0.09643812	291.39	-0.06100712	291.39	-0.08563498	291.39	-0.04913232	291.39	-0.09020213	291.39	-0.053581	291.39	-0.04825141	291.39	-0.04825678
291.59	1.246315	291.59	1.14188	291.59	1.169163	291.59	1.178494	291.59	1.083721	291.59	1.145373	291.59	1.171195	291.59	-0.02718282	291.59	-0.09503512	291.59	-0.06360368	291.59	-0.08612673	291.59	-0.04920116	291.59	-0.09192432	291.59	-0.05045453	291.59	-0.04852029	291.59	-0.05084363
291.79	1.244594	291.79	1.137821	291.79	1.172351	291.79	1.174972	291.79	1.087827	291.79	1.143733	291.79	1.168162	291.79	-0.03255995	291.79	-0.1016961	291.79	-0.05911954	291.79	-0.08939061	291.79	-0.04703122	291.79	-0.09101041	291.79	-0.04972808	291.79	-0.05280518	291.79	-0.04732943
291.99	1.248348	291.99	1.13652	291.99	1.173541	291.99	1.174912	291.99	1.08589	291.99	1.141319	291.99	1.171309	291.99	-0.02755512	291.99	-0.09115418	291.99	-0.0609304	291.99	-0.08660049	291.99	-0.04529364	291.99	-0.08904181	291.99	-0.044976	291.99	-0.04903989	291.99	-0.04797033
292.19	1.242236	292.19	1.138635	292.19	1.170709	292.19	1.174374	292.19	1.083613	292.19	1.145484	292.19	1.176775	292.19	-0.02697876	292.19	-0.09785562	292.19	-0.06190681	292.19	-0.08822423	292.19	-0.05047043	292.19	-0.08724251	292.19	-0.04790241	292.19	-0.04987005	292.19	-0.04888112
292.39	1.240294	292.39	1.141484	292.39	1.172792	292.39	1.177609	292.39	1.085086	292.39	1.146799	292.39	1.17437	292.39	-0.02564191	292.39	-0.09344416	292.39	-0.0662537	292.39	-0.08919692	292.39	-0.05039849	292.39	-0.09564524	292.39	-0.04532607	292.39	-0.04850295	292.39	-0.04423522
292.59	1.246204	292.59	1.139788	292.59	1.172115	292.59	1.174053	292.59	1.086022	292.59	1.14335	292.59	1.174969	292.59	-0.02681121	292.59	-0.09394669	292.59	-0.06170386	292.59	-0.09067105	292.59	-0.046219	292.59	-0.09107663	292.59	-0.04967711	292.59	-0.04999911	292.59	-0.04077231
292.79	1.248817	292.79	1.139274	292.79	1.172913	292.79	1.177172	292.79	1.083272	292.79	1.138775	292.79	1.173864	292.79	-0.03251357	292.79	-0.09236131	292.79	-0.06219112	292.79	-0.08762405	292.79	-0.04834222	292.79	-0.09298711	292.79	-0.04690301	292.79	-0.05270661	292.79	-0.04873118
292.99	1.245966	292.99	1.139756	292.99	1.1708	292.99	1.173936	292.99	1.086908	292.99	1.146135	292.99	1.171854	292.99	-0.02723089	292.99	-0.09547736	292.99	-0.06207637	292.99	-0.08812229	292.99	-0.04993325	292.99	-0.09665323	292.99	-0.05128866	292.99	-0.04819885	292.99	-0.04923363
293.19	1.249518	293.19	1.139082	293.19	1.173386	293.19	1.174281	293.19	1.084935	293.19	1.146625	293.19	1.16979	293.19	-0.03156371	293.19	-0.09484348	293.19	-0.06194397	293.19	-0.08796197	293.19	-0.04432891	293.19	-0.08919233	293.19	-0.05141693	293.19	-0.04891957	293.19	-0.04556683
293.39	1.249934	293.39	1.142032	293.39	1.17631	293.39	1.173673	293.39	1.088309	293.39	1.146082	293.39	1.173658	293.39	-0.03023886	293.39	-0.09507985	293.39	-0.06039702	293.39	-0.08743305	293.39	-0.04978213	293.39	-0.08797072	293.39	-0.0495478	293.39	-0.04779492	293.39	-0.05010157
293.59	1.246374	293.59	1.139758	293.59	1.176023	293.59	1.179644	293.59	1.087065	293.59	1.144543	293.59	1.168646	293.59	-0.03010487	293.59	-0.09142159	293.59	-0.05647888	293.59	-0.08988414	293.59	-0.04594776	293.59	-0.08686543	293.59	-0.04648077	293.59	-0.04744432	293.59	-0.04911165
293.79	1.248578	293.79	1.140436	293.79	1.173576	293.79	1.178048	293.79	1.083953	293.79	1.141989	293.79	1.173884	293.79	-0.02852832	293.79	-0.09577256	293.79	-0.0618941	293.79	-0.09014609	293.79	-0.04237113	293.79	-0.08725855	293.79	-0.04963657	293.79	-0.05071307	293.79	-0.04608371
293.99	1.247088	293.99	1.138924	293.99	1.170979	293.99	1.178485	293.99	1.087399	293.99	1.144951	293.99	1.17434	293.99	-0.02691239	293.99	-0.0975817	293.99	-0.06297876	293.99	-0.08635575	293.99	-0.04602277	293.99	-0.08932964	293.99	-0.04471651	293.99	-0.04853718	293.99	-0.0457919
294.19	1.249758	294.19	1.142147	294.19	1.174216	294.19	1.178391	294.19	1.090404	294.19	1.142431	294.19	1.172892	294.19	-0.02823329	294.19	-0.09498626	294.19	-0.06144196	294.19	-0.08931915	294.19	-0.04694991	294.19	-0.09593559	294.19	-0.05158235	294.19	-0.04717246	294.19	-0.04523857
294.39	1.245777	294.39	1.147943	294.39	1.170745	294.39	1.174502	294.39	1.088974	294.39	1.143618	294.39	1.174371	294.39	-0.02956048	294.39	-0.09606487	294.39	-0.06121607	294.39	-0.08642374	294.39	-0.04426159	294.39	-0.09452464	294.39	-0.05001635	294.39	-0.05218557	294.39	-0.04955577
294.59	1.249285	294.59	1.142596	294.59	1.171464	294.59	1.177565	294.59	1.084693	294.59	1.145285	294.59	1.178206	294.59	-0.03026053	294.59	-0.09237933	294.59	-0.06185002	294.59	-0.08429962	294.59	-0.04248958	294.59	-0.08967114	294.59	-0.04787488	294.59	-0.05168773	294.59	-0.0475137
294.79	1.24903	294.79	1.140326	294.79	1.171077	294.79	1.175497	294.79	1.091101	294.79	1.145241	294.79	1.174826	294.79	-0.03235166	294.79	-0.09512909	294.79	-0.05435724	294.79	-0.0876526	294.79	-0.04226968	294.79	-0.09226467	294.79	-0.04697241	294.79	-0.04868791	294.79	-0.04487159
294.99	1.245886	294.99	1.139957	294.99	1.176094	294.99	1.178497	294.99	1.087315	294.99	1.142902	294.99	1.178351	294.99	-0.03189101	294.99	-0.09538252	294.99	-0.05958822	294.99	-0.08972514	294.99	-0.04808747	294.99	-0.0855308	294.99	-0.04665795	294.99	-0.04859137	294.99	-0.04746328
295.2	1.25006	295.2	1.143667	295.2	1.171563	295.2	1.180177	295.2	1.088857	295.2	1.146279	295.2	1.17557	295.2	-0.02836223	295.19	-0.09914737	295.19	-0.05893014	295.19	-0.08846326	295.19	-0.04678212	295.19	-0.08630569	295.19	-0.0462528	295.19	-0.04962191	295.19	-0.04646513
295.39	1.249351	295.39	1.141641	295.39	1.172223	295.39	1.178343	295.39	1.087832	295.39	1.146184	295.39	1.173935	295.39	-0.02173536	295.39	-0.09496511	295.39	-0.06235509	295.39	-0.08873358	295.39	-0.04179018	295.39	-0.08892781	295.39	-0.04761493	295.39	-0.05078026	295.39	-0.04699731
295.59	1.245592	295.59	1.144227	295.59	1.173188	295.59	1.178442	295.59	1.08286	295.59	1.144633	295.59	1.179944	295.59	-0.02538354	295.59	-0.09076969	295.59	-0.0597517	295.59	-0.08951953	295.59	-0.0452272	295.59	-0.09230942	295.59	-0.0512032	295.59	-0.04822677	295.59	-0.04727182
295.79	1.250747	295.79	1.139245	295.79	1.176374	295.79	1.176621	295.79	1.082693	295.79	1.148503	295.79	1.173536	295.79	-0.02567063	295.79	-0.09115657	295.79	-0.0591381	295.79	-0.08768304	295.79	-0.05045155	295.79	-0.08839552	295.79	-0.04681383	295.79	-0.05470211	295.79	-0.04381878
295.99	1.248957	295.99	1.145342	295.99	1.172811	295.99	1.183593	295.99	1.088691	295.99	1.146236	295.99	1.180117	295.99	-0.02728398	295.99	-0.09077866	295.99	-0.06136158	295.99	-0.09140274	295.99	-0.05045035	295.99	-0.09340205	295.99	-0.04958416	295.99	-0.04778837	295.99	-0.04571844
296.19	1.244187	296.19	1.14169	296.19	1.178637	296.19	1.177702	296.19	1.084899	296.19	1.14754	296.19	1.174685	296.19	-0.02779842	296.19	-0.09595675	296.19	-0.06449129	296.19	-0.09269099	296.19	-0.049202	296.19	-0.08927357	296.19	-0.04701712	296.19	-0.04997456	296.19	-0.04931635
296.39	1.246973	296.39	1.142383	296.39	1.173123	296.39	1.175231	296.39	1.086496	296.39	1.148167	296.39	1.172597	296.39	-0.02574299	296.39	-0.09611024	296.39	-0.05901549	296.39	-0.08504841	296.39	-0.05034376	296.39	-0.08901813	296.39	-0.05031303	296.39	-0.04796739	296.39	-0.04439262
296.59	1.24799	296.59	1.139702	296.59	1.17353	296.59	1.180308	296.59	1.0843	296.59	1.147088	296.59	1.171049	296.59	-0.02497178	296.59	-0.09675963	296.59	-0.05576607	296.59	-0.08700785	296.59	-0.04493219	296.59	-0.08674102	296.59	-0.05026772	296.59	-0.05031165	296.59	-0.04780846
296.8	1.246941	296.8	1.14249	296.8	1.175347	296.8	1.177094	296.8	1.089184	296.8	1.145417	296.8	1.174006	296.8	-0.02504407	296.79	-0.09134545	296.79	-0.06389365	296.79	-0.08797328	296.79	-0.04380439	296.79	-0.08978131	296.79	-0.04907871	296.79	-0.04838795	296.79	-0.05315313
296.99	1.249144	296.99	1.144749	296.99	1.172561	296.99	1.182115	296.99	1.086733	296.99	1.144503	296.99	1.177351	296.99	-0.02629082	296.99	-0.0935633	296.99	-0.0601146	296.99	-0.08811777	296.99	-0.04736504	296.99	-0.08396658	296.99	-0.04542512	296.99	-0.05049595	296.99	-0.04612961
297.19	1.250743	297.19	1.14443	297.19	1.176809	297.19	1.183072	297.19	1.085852	297.19	1.149809	297.19	1.176282	297.19	-0.02864633	297.19	-0.093926	297.19	-0.05808487	297.19	-0.08837516	297.19	-0.04870463	297.19	-0.087134	297.19	-0.05196279	297.19	-0.05226004	297.19	-0.04831932
297.39	1.247215	297.39	1.145536	297.39	1.173809	297.39	1.178144	297.39	1.090464	297.39	1.142679	297.39	1.173974	297.39	-0.02620507	297.39	-0.09391603	297.39	-0.05819985	297.39	-0.08328171	297.39	-0.04652424	297.39	-0.09131154	297.39	-0.0445921	297.39	-0.04902246	297.39	-0.04737409
297.59	1.246469	297.59	1.145254	297.59	1.174831	297.59	1.179943	297.59	1.09025	297.59	1.145488	297.59	1.174003	297.59	-0.0302617	297.59	-0.09657513	297.59	-0.05778201	297.59	-0.09016642	297.59	-0.04214983	297.59	-0.08888263	297.59	-0.04934115	297.59	-0.0531336	297.59	-0.04238239
297.8	1.248292	297.8	1.144679	297.8	1.176737	297.8	1.179011	297.8	1.089337	297.8	1.150664	297.8	1.171057	297.8	-0.02798749	297.79	-0.0915209	297.79	-0.05942989	297.79	-0.08930638	297.79	-0.04668257	297.79	-0.08756912	297.79	-0.04880467	297.79	-0.04993892	297.79	-0.04363184
297.99	1.250785	297.99	1.14786	297.99	1.176012	297.99	1.183949	297.99	1.090967	297.99	1.148498	297.99	1.178593	297.99	-0.02930805	297.99	-0.09218505	297.99	-0.06226604	297.99	-0.08831343	297.99	-0.0437987	297.99	-0.08834439	297.99	-0.04893301	297.99	-0.0487158	297.99	-0.04592582
298.19	1.246991	298.19	1.145993	298.19	1.177181	298.19	1.175323	298.19	1.088253	298.19	1.145888	298.19	1.176522	298.19	-0.0235614	298.19	-0.08905873	298.19	-0.05661662	298.19	-0.08160384	298.19	-0.04477488	298.19	-0.09068575	298.19	-0.0485849	298.19	-0.04806143	298.19	-0.04760078
298.39	1.246863	298.39	1.144188	298.39	1.173298	298.39	1.18156	298.39	1.085004	298.39	1.145113	298.39	1.174816	298.39	-0.02020006	298.39	-0.09072055	298.39	-0.05506355	298.39	-0.09101117	298.39	-0.04709729	298.39	-0.08765571	298.39	-0.05056337	298.39	-0.05073384	298.39	-0.04417913
298.59	1.246214	298.59	1.138198	298.59	1.173567	298.59	1.181305	298.59	1.086757	298.59	1.147541	298.59	1.179409	298.59	-0.02085618	298.59	-0.09396261	298.59	-0.06083286	298.59	-0.08486709	298.59	-0.04285195	298.59	-0.09010871	298.59	-0.05000082	298.59	-0.05289399	298.59	-0.04620558
298.79	1.251807	298.79	1.1469	298.79	1.172641	298.79	1.182438	298.79	1.092403	298.79	1.143647	298.79	1.174715	298.79	-0.02834319	298.79	-0.09288137	298.79	-0.0592491	298.79	-0.09048988	298.79	-0.04757999	298.79	-0.08617241	298.79	-0.04375113	298.79	-0.05033301	298.79	-0.04389887
298.99	1.252127	298.99	1.141603	298.99	1.179329	298.99	1.180907	298.99	1.090055	298.99	1.145023	298.99	1.17445	298.99	-0.02496994	298.99	-0.09447707	298.99	-0.05950724	298.99	-0.0935066	298.99	-0.04646772	298.99	-0.08734167	298.99	-0.04771516	298.99	-0.04960874	298.99	-0.04569801
299.19	1.253894	299.19	1.142916	299.19	1.17955	299.19	1.176058	299.19	1.087178	299.19	1.151035	299.19	1.179869	299.19	-0.02222553	299.19	-0.08923154	299.19	-0.05799524	299.19	-0.08702937	299.19	-0.04203022	299.19	-0.08730759	299.19	-0.05136829	299.19	-0.04835224	299.19	-0.05182072
299.39	1.24747	299.39	1.144987	299.39	1.176316	299.39	1.182998	299.39	1.092965	299.39	1.148092	299.39	1.17337	299.39	-0.02944346	299.39	-0.09277037	299.39	-0.05804281	299.39	-0.08629696	299.39	-0.0461605	299.39	-0.0903933	299.39	-0.05200594	299.39	-0.05159404	299.39	-0.04432916
[truncated: 12,052 more rows]
