# Supplementary material for: Functional development of a V3/glycan-specific broadly neutralizing antibody isolated from a case of HIV superinfection
Source: eLife journal article supplement (doi:10.7554/elife.68110), 2021-07-15
Supplement: fig2-figsupp1-data2 [file QA013.2 Lineage_BLI Expt w Dbl Ref_2020.10.08.xlsx]

## Sheet: Autologous 765 dpi gp120
Date:	2020.10.08					BB = Octet binding buffer
			mAbs at 10 ug/ml in BB			N = Neutralization Buffer (Octet buffer)
			200 µl per well			R = Regeneration Buffer							Typical Expt. Set-Up
	1	2	3	4	5	6	7	8	9	10	11	12	nM		Dilution series of SOSIP
A	BB	QA013.2 mature	QA013.2 E26G/Lmat	QA013.2 ∆CDRH1	QA013.2 G7/L4	QA013.2 Naïve (G0/L0)	10E8		BG505.W6.C2 gp120 2000 nM	QA013 765 dpi gp120 2000 nM	R	N	500	Determine full kinetic range	400 uL total vol
B	BB	QA013.2 mature	QA013.2 E26G/Lmat	QA013.2 ∆CDRH1	QA013.2 G7/L4	QA013.2 Naïve (G0/L0)	10E8		BG505.W6.C2 gp120 1000 nM	QA013 765 dpi gp120 1000 nM	R	N	250		200 uL BB + 200 uL
C	BB	QA013.2 mature	QA013.2 E26G/Lmat	QA013.2 ∆CDRH1	QA013.2 G7/L4	QA013.2 Naïve (G0/L0)	10E8		BG505.W6.C2 gp120 500 nM	QA013 765 dpi gp120 500 nM	R	N	125		200 uL BB + 200 uL
D	BB	QA013.2 mature	QA013.2 E26G/Lmat	QA013.2 ∆CDRH1	QA013.2 G7/L4	QA013.2 Naïve (G0/L0)	10E8		BG505.W6.C2 gp120 250 nM	QA013 765 dpi gp120 250 nM	R	N	62.5		200 uL BB + 200 uL
E	BB	QA013.2 mature	QA013.2 E26G/Lmat	QA013.2 ∆CDRH1	QA013.2 G7/L4	QA013.2 Naïve (G0/L0)	10E8		BG505.W6.C2 gp120 125 nM	QA013 765 dpi gp120 125 nM	R	N	31.25		200 uL BB + 200 uL
F	BB	QA013.2 mature	QA013.2 E26G/Lmat	QA013.2 ∆CDRH1	QA013.2 G7/L4	QA013.2 Naïve (G0/L0)	10E8		BG505.W6.C2 gp120 62.5 nM	QA013 765 dpi gp120 62.5 nM	R	N	15.625		200 uL BB + 200 uL
G	BB	QA013.2 mature	QA013.2 E26G/Lmat	QA013.2 ∆CDRH1	QA013.2 G7/L4	QA013.2 Naïve (G0/L0)	10E8		BG505.W6.C2 gp120 31.25 nM	QA013 765 dpi gp120 31.25 nM	R	N	250	Yes/No binding	200 uL BB + 200 uL
H	BB	BB	BB	BB	BB	BB	BB	BB	BB	BB	R	N
	Hydrated anti-human IgG Fc Capture (AHC) or anti-human Fab-							Time (s)	Shaker (rpm)
	CH1 biosensors were immobilized for 4 min with purified infant antibodies						Sensor Check	30	1000
	diluted to 10 µg mL-1 in PBS (pH 7.4) supplemented with 1% BSA, 0.03%						Baseline	30	1000
	TWEEN 20, 0.02% sodium azide. After a stable baseline signal was established,						Loading	80	600
	antibody-immobilized tips were moved to wells containing a 2-fold dilution						Association	180	600
	series of Env SOSIP trimer to monitor association for 4min. Tips were then						Dissociation	180	600
	moved back to wells containing buffer to monitor dissociation for 6 min.
	Ab	uL to add	concentration (ug/mL)	total volume (uL)	final concentration (ug/mL)	volume BB to add (uL)		Antigen	Desired volume (uL)	MW	Concentration (mg/mL)	Vol. for 2 uM	Volume BB
	QA013.2 mature	17.7725	844	1500	10	1482.23		QA013.765M.C1 gp120 and BG505.W6.C2 gp120	415	120000	1	99.6	315.4
	E26G/Lmat	29.4695	509	1500	10	1470.53						https://www.graphpad.com/quickcalcs/molarityform.cfm
	∆CDRH1/Lmat	20.4918	732	1500	10	1479.51		2000 nM =	2e-06	mol/L
	G7/L4	19.9734	751	1500	10	1480.03
	Naïve (G0/L0)	13.5135	1110	1500	10	1486.49		8.3e-10	(desired number of moles)
	10E8	15	1000	1500	10	1485		9.96e-05	(number of grams)
								99.6	(number of uL)

## Sheet: Autologous 70 dpi gp120
Date:	2020.09.30					BB = Octet binding buffer
			mAbs at 10 ug/ml in BB			N = Neutralization Buffer (Octet buffer)
			200 µl per well			R = Regeneration Buffer							Typical Expt. Set-Up
	1	2	3	4	5	6	7	8	9	10	11	12	nM		Dilution series of SOSIP
A	BB	QA013.2 mature	QA013.2 E26G/Lmat	QA013.2 ∆CDRH1	QA013.2 ∆CDRH3	10E8			BG505 SOSIP 500 nM	QA013 70 dpi gp120 2000 nM	R	N	500	Determine full kinetic range	400 uL total vol
B	BB	QA013.2 mature	QA013.2 E26G/Lmat	QA013.2 ∆CDRH1	QA013.2 ∆CDRH3	10E8			BG505 SOSIP 250 nM	QA013 70 dpi gp120 1000 nM	R	N	250		200 uL BB + 200 uL
C	BB	QA013.2 mature	QA013.2 E26G/Lmat	QA013.2 ∆CDRH1	QA013.2 ∆CDRH3	10E8			BG505 SOSIP 125 nM	QA013 70 dpi gp120 500 nM	R	N	125		200 uL BB + 200 uL
D	BB	QA013.2 mature	QA013.2 E26G/Lmat	QA013.2 ∆CDRH1	QA013.2 ∆CDRH3	10E8			BG505 SOSIP 62.5 nM	QA013 70 dpi gp120 250 nM	R	N	62.5		200 uL BB + 200 uL
E	BB	QA013.2 mature	QA013.2 E26G/Lmat	QA013.2 ∆CDRH1	QA013.2 ∆CDRH3	10E8			BG505 SOSIP 31.25 nM	QA013 70 dpi gp120 125 nM	R	N	31.25		200 uL BB + 200 uL
F	BB	QA013.2 mature	QA013.2 E26G/Lmat	QA013.2 ∆CDRH1	QA013.2 ∆CDRH3	10E8			BG505 SOSIP 15.625 nM	QA013 70 dpi gp120 62.5 nM	R	N	15.625		200 uL BB + 200 uL
G	BB	QA013.2 mature	QA013.2 E26G/Lmat	QA013.2 ∆CDRH1	QA013.2 ∆CDRH3	10E8			BG505 SOSIP 7.8125 nM	QA013 70 dpi gp120 31.25 nM	R	N	250	Yes/No binding	200 uL BB + 200 uL
H	BB	BB	BB	BB	BB	BB	BB	BB	BB	BB	R	N
	Hydrated anti-human IgG Fc Capture (AHC) or anti-human Fab-							Time (s)	Shaker (rpm)
	CH1 biosensors were immobilized for 4 min with purified infant antibodies						Sensor Check	30	1000
	diluted to 10 µg mL-1 in PBS (pH 7.4) supplemented with 1% BSA, 0.03%						Baseline	30	1000
	TWEEN 20, 0.02% sodium azide. After a stable baseline signal was established,						Loading	80	600
	antibody-immobilized tips were moved to wells containing a 2-fold dilution						Association	180	600
	series of Env SOSIP trimer to monitor association for 4min. Tips were then						Dissociation	180	600
	moved back to wells containing buffer to monitor dissociation for 6 min.
	Ab	uL to add	concentration (ug/mL)	total volume (uL)	final concentration (ug/mL)	volume BB to add (uL)		Antigen	Desired volume (uL)	MW	Concentration (mg/mL)	Vol. for 2 uM	Volume BB
	QA013.2 mature	17.7725	844	1500	10	1482.23		QA013.70.H1 gp120	415	120000	1	99.6	315.4
	E26G/Lmat	29.4695	509	1500	10	1470.53						https://www.graphpad.com/quickcalcs/molarityform.cfm
	∆CDRH1/Lmat	20.4918	732	1500	10	1479.51		2000 nM =	2e-06	mol/L
	∆CDRH3/Lmat	23.2919	644	1500	10	1476.71
	10E8	15	1000	1500	10	1485		8.3e-10	(desired number of moles)
								9.96e-05	(number of grams)
								99.6	(number of uL)
