# Supplementary material for: Functional development of a V3/glycan-specific broadly neutralizing antibody isolated from a case of HIV superinfection
Source: eLife journal article supplement (doi:10.7554/elife.68110), 2021-07-15
Supplement: fig4-data2 [file A3.xls]

Vers 3.43 Data Simulation
Conc1	5E-07	5E-07	5E-07	5E-07	5E-07	5E-07	5E-07	5E-07
Start1	200	729.99	1259.99	1789.99	2319.98	2849.98	3379.97	3909.97
Stop1	559.8	1089.79	1619.79	2149.78	2679.78	3209.77	3739.77	4269.77
Time1	Data1	Sim1	Time2	Data2	Sim2	Time3	Data3	Sim3	Time4	Data4	Sim4	Time5	Data5	Sim5	Time6	Data6	Sim6	Time7	Data7	Sim7	Time8	Data8	Sim8
200	0.00770365		729.99	0.01373616		1259.99	0.01743664		1789.99	0.01754839		2319.98	0.00614177		2849.98	0.00543653		3379.97	0.00995753		3909.97	0.01200179
200.2	0.00742005		730.19	0.01406692		1260.19	0.01710615		1790.19	0.01718586		2320.18	0.00483806		2850.18	0.00493289		3380.17	0.01014475		3910.17	0.01109583
200.4	0.00679673		730.39	0.01491857		1260.39	0.01762787		1790.39	0.01677188		2320.38	0.00378136		2850.38	0.00492141		3380.37	0.01068049		3910.37	0.01115295
200.6	0.00601139		730.59	0.01510599		1260.59	0.01784756		1790.59	0.01594512		2320.58	0.00297781		2850.58	0.00462052		3380.57	0.01047306		3910.57	0.01098429
200.8	0.00590029		730.79	0.01587165		1260.79	0.0179738		1790.79	0.0157551		2320.78	0.00231006		2850.78	0.00390925		3380.77	0.01105626		3910.77	0.01076571
201	0.00584182		730.99	0.01657851		1260.99	0.01874893		1790.99	0.01546429		2320.98	0.00120072		2850.98	0.00369049		3380.97	0.01144538		3910.97	0.01063836
201.2	0.00492194		731.19	0.01733675		1261.19	0.01903572		1791.19	0.0165486		2321.18	0.00093928		2851.18	0.00426977		3381.17	0.01139447		3911.17	0.01020449
201.4	0.00444162		731.39	0.01822886		1261.39	0.0190684		1791.39	0.01701172		2321.38	-0.00009351		2851.38	0.00362165		3381.37	0.01207145		3911.37	0.010791
201.6	0.00386178		731.59	0.01896111		1261.59	0.01994692		1791.59	0.01811829		2321.58	-0.00009565		2851.58	0.00379291		3381.57	0.01270482		3911.57	0.01156581
201.8	0.00393331		731.79	0.01968807		1261.79	0.0195212		1791.79	0.01874768		2321.78	-0.00094198		2851.78	0.00407964		3381.77	0.01350471		3911.77	0.01191164
202	0.00339998		731.99	0.02053422		1261.99	0.01981816		1791.99	0.0197595		2321.98	-0.00189424		2851.98	0.00522471		3381.97	0.0141153		3911.97	0.0128661
202.2	0.00341639		732.19	0.02121795		1262.19	0.02023025		1792.19	0.02071283		2322.18	-0.00114081		2852.18	0.00586533		3382.17	0.01455157		3912.17	0.01333804
202.4	0.00324411		732.39	0.02181709		1262.39	0.02032085		1792.39	0.02190653		2322.38	-0.00165153		2852.38	0.00728658		3382.37	0.01527014		3912.37	0.01374072
202.6	0.00381415		732.59	0.02194701		1262.59	0.02026247		1792.59	0.02269531		2322.58	-0.00122043		2852.58	0.00743962		3382.57	0.0157513		3912.57	0.01341857
202.8	0.00365968		732.79	0.0217074		1262.79	0.01981601		1792.79	0.02309393		2322.78	-0.00132064		2852.78	0.00730174		3382.77	0.01478713		3912.77	0.01382531
203	0.00342587		732.99	0.0214774		1262.99	0.01947838		1792.99	0.02297161		2322.98	-0.00037202		2852.98	0.00821652		3382.97	0.01466394		3912.97	0.01491414
203.2	0.00298953		733.19	0.02092507		1263.19	0.01893719		1793.19	0.02278409		2323.18	-0.00134583		2853.18	0.00864509		3383.17	0.01527851		3913.17	0.01559375
203.4	0.00327667		733.39	0.01999607		1263.39	0.01890362		1793.39	0.02325011		2323.38	-0.00187425		2853.38	0.0080287		3383.37	0.01557332		3913.37	0.01618023
203.6	0.00374838		733.59	0.02008548		1263.59	0.01931832		1793.59	0.02296827		2323.58	-0.00173596		2853.58	0.00747882		3383.57	0.01461399		3913.57	0.01662441
203.8	0.00371069		733.79	0.0194862		1263.79	0.0191133		1793.79	0.023304		2323.78	-0.00146847		2853.78	0.00723537		3383.77	0.01558228		3913.77	0.01703141
204	0.00371176		733.99	0.0190611		1263.99	0.01953597		1793.99	0.024009		2323.98	-0.00055584		2853.98	0.00745893		3383.97	0.01487035		3913.97	0.01758629
204.2	0.00432985		734.19	0.01940522		1264.19	0.02036342		1794.19	0.02438612		2324.18	-0.00160028		2854.18	0.00801811		3384.17	0.0138868		3914.17	0.01785604
204.4	0.0045735		734.39	0.019124		1264.39	0.02157789		1794.39	0.02472298		2324.38	-0.00163667		2854.38	0.00870904		3384.37	0.01380825		3914.37	0.01950991
204.6	0.00476039		734.59	0.01827273		1264.59	0.02200345		1794.59	0.02420873		2324.58	-0.00122577		2854.58	0.00867192		3384.57	0.01292273		3914.57	0.01932644
204.8	0.00548703		734.79	0.01882918		1264.79	0.02250694		1794.79	0.02496103		2324.78	-0.00082038		2854.78	0.0079308		3384.77	0.01258819		3914.77	0.01983515
205	0.00561906		734.99	0.01840486		1264.99	0.02277279		1794.99	0.02530901		2324.98	-0.00166896		2854.98	0.00841462		3384.97	0.01178273		3914.97	0.02002226
205.2	0.0049678		735.19	0.01856838		1265.19	0.02216858		1795.19	0.02538053		2325.18	-0.00167449		2855.18	0.00857553		3385.17	0.01134773		3915.17	0.02084071
205.4	0.00502876		735.39	0.01884434		1265.39	0.02211186		1795.39	0.02508441		2325.38	-0.00219484		2855.38	0.00817297		3385.37	0.01230006		3915.37	0.02191465
205.6	0.00479277		735.59	0.01928232		1265.59	0.02222873		1795.59	0.02554852		2325.58	-0.00182928		2855.58	0.00883459		3385.57	0.0126133		3915.57	0.02226787
205.8	0.00506358		735.79	0.01952295		1265.79	0.0212699		1795.79	0.02458957		2325.78	-0.00264725		2855.78	0.00925137		3385.77	0.01314873		3915.77	0.02221457
206	0.00433909		735.99	0.01940011		1265.99	0.02169894		1795.99	0.02462407		2325.98	-0.00273982		2855.98	0.00901997		3385.97	0.01316448		3915.97	0.02307341
206.2	0.00509278		736.19	0.01996816		1266.19	0.02114544		1796.19	0.02488206		2326.18	-0.00220282		2856.18	0.0090082		3386.17	0.01293396		3916.17	0.0226284
206.4	0.00557853		736.39	0.02096505		1266.39	0.02195307		1796.39	0.02515335		2326.38	-0.00181957		2856.38	0.00916867		3386.37	0.01265588		3916.37	0.02325908
206.6	0.00580126		736.59	0.02088849		1266.59	0.02161812		1796.59	0.02500795		2326.58	-0.00161044		2856.58	0.00939155		3386.57	0.01196673		3916.57	0.02365361
206.8	0.00510336		736.79	0.02071004		1266.79	0.02156996		1796.79	0.0254933		2326.78	-0.00137515		2856.78	0.00959706		3386.77	0.01204139		3916.77	0.02494421
207	0.00499156		736.99	0.02110269		1266.99	0.02172589		1796.99	0.02592199		2326.98	-0.00127862		2856.98	0.00991689		3386.97	0.01339323		3916.97	0.02477935
207.2	0.00457302		737.19	0.02150303		1267.19	0.02225763		1797.19	0.0265134		2327.18	-0.00160554		2857.18	0.00956437		3387.17	0.01301636		3917.17	0.0253536
207.4	0.00555552		737.39	0.02147144		1267.39	0.02336535		1797.39	0.02677577		2327.38	-0.00202733		2857.38	0.00874146		3387.37	0.0135765		3917.37	0.02543309
207.6	0.00623685		737.59	0.02141899		1267.59	0.02360852		1797.59	0.02749464		2327.58	-0.00306222		2857.58	0.00817763		3387.57	0.01352255		3917.57	0.02648086
207.8	0.00584977		737.79	0.02104183		1267.79	0.024661		1797.79	0.02886133		2327.78	-0.00285111		2857.78	0.00830142		3387.77	0.01382773		3917.77	0.0267429
208	0.00586982		737.99	0.02069769		1267.99	0.02564094		1797.99	0.02958493		2327.98	-0.00295983		2857.98	0.00834632		3387.97	0.01286895		3917.97	0.02792596
208.2	0.00642654		738.19	0.02074323		1268.19	0.02668221		1798.19	0.03019539		2328.18	-0.00285791		2858.18	0.00843622		3388.17	0.0125232		3918.17	0.02829396
208.4	0.00694877		738.39	0.02089157		1268.39	0.02659337		1798.39	0.03062246		2328.38	-0.00287087		2858.38	0.00861331		3388.37	0.01243582		3918.37	0.02870508
208.6	0.00747796		738.59	0.02054119		1268.59	0.02719837		1798.59	0.0308923		2328.58	-0.00281554		2858.58	0.00890462		3388.57	0.01205715		3918.57	0.02846571
208.8	0.00826662		738.79	0.02100899		1268.79	0.02675365		1798.79	0.03139534		2328.78	-0.00334415		2858.78	0.00902077		3388.77	0.01182428		3918.77	0.02887571
209	0.00792488		738.99	0.02050434		1268.99	0.02658516		1798.99	0.03106563		2328.98	-0.00348688		2858.98	0.01045081		3388.97	0.01147081		3918.97	0.02853468
209.2	0.00795659		739.19	0.02151934		1269.19	0.02646172		1799.19	0.03084442		2329.18	-0.00281932		2859.18	0.01120685		3389.17	0.01208164		3919.17	0.02924107
209.4	0.0069956		739.39	0.02187129		1269.39	0.02688183		1799.39	0.03212926		2329.38	-0.00216957		2859.38	0.01179594		3389.37	0.01272905		3919.37	0.02883463
209.6	0.00672201		739.59	0.02227791		1269.59	0.02726125		1799.59	0.03216709		2329.58	-0.00192206		2859.58	0.01218708		3389.57	0.01240659		3919.57	0.02814185
209.8	0.00631094		739.79	0.02223718		1269.79	0.02763743		1799.79	0.0315979		2329.78	-0.00147186		2859.78	0.01230316		3389.77	0.0119664		3919.77	0.02866966
210	0.00606384		739.99	0.02210218		1269.99	0.02802019		1799.99	0.03253241		2329.98	-0.00113936		2859.98	0.01285303		3389.97	0.01126736		3919.97	0.02961776
210.2	0.00656294		740.19	0.02307415		1270.19	0.02765367		1800.19	0.03281144		2330.18	-0.00056788		2860.18	0.01397387		3390.17	0.01104924		3920.17	0.02953772
210.4	0.00597534		740.39	0.02352249		1270.39	0.02884025		1800.39	0.03245298		2330.38	0.00069149		2860.38	0.01423219		3390.37	0.01083256		3920.37	0.02946812
210.6	0.00525028		740.59	0.02314426		1270.59	0.02905225		1800.59	0.0329466		2330.58	0.00098898		2860.58	0.01538155		3390.57	0.01063597		3920.57	0.02974709
210.8	0.00442755		740.79	0.02272046		1270.79	0.02935429		1800.79	0.03235021		2330.78	0.00124814		2860.78	0.01491975		3390.77	0.01148968		3920.77	0.03064182
211	0.00505641		740.99	0.02306994		1270.99	0.02972336		1800.99	0.03254223		2330.98	0.00140531		2860.98	0.01581897		3390.97	0.01091124		3920.97	0.03108742
211.2	0.00492999		741.19	0.02286414		1271.19	0.02951968		1801.19	0.03283059		2331.18	0.00155221		2861.18	0.01480798		3391.17	0.01049202		3921.17	0.03261226
211.4	0.0054679		741.39	0.02204531		1271.39	0.03042812		1801.39	0.03339314		2331.38	0.00146444		2861.38	0.01529927		3391.37	0.01082565		3921.37	0.03187336
211.6	0.00541486		741.59	0.02116453		1271.59	0.0305424		1801.59	0.03336949		2331.58	0.00161307		2861.58	0.01529684		3391.57	0.01016833		3921.57	0.03329196
211.8	0.00508957		741.79	0.02067762		1271.79	0.03114218		1801.79	0.03337058		2331.78	0.00290812		2861.78	0.01566672		3391.77	0.0100156		3921.77	0.03388967
212	0.00564817		741.99	0.02103421		1271.99	0.03062392		1801.99	0.03293864		2331.98	0.00278452		2861.98	0.0157345		3391.97	0.01002495		3921.97	0.03527071
212.2	0.00657001		742.19	0.02153818		1272.19	0.0308025		1802.19	0.03228256		2332.18	0.00280879		2862.18	0.01570305		3392.17	0.01078322		3922.17	0.03530928
212.4	0.00743642		742.39	0.02164993		1272.39	0.03013379		1802.39	0.03216219		2332.38	0.00266918		2862.38	0.01562796		3392.37	0.01095536		3922.37	0.03509254
212.6	0.00877036		742.59	0.0208561		1272.59	0.02975056		1802.59	0.03237681		2332.58	0.0026926		2862.58	0.015679		3392.57	0.01175297		3922.57	0.03563932
212.8	0.00959881		742.79	0.02166133		1272.79	0.02957773		1802.79	0.03244286		2332.78	0.00280828		2862.78	0.01493834		3392.77	0.01238635		3922.77	0.03575516
213	0.00949665		742.99	0.02231968		1272.99	0.03000283		1802.99	0.03318994		2332.98	0.0029057		2862.98	0.01472046		3392.97	0.01312425		3922.97	0.03584014
213.2	0.01018707		743.19	0.02301538		1273.19	0.03076631		1803.19	0.03408845		2333.18	0.00261657		2863.18	0.01408339		3393.17	0.0140216		3923.17	0.03629024
213.4	0.00957909		743.39	0.02269491		1273.39	0.03103309		1803.39	0.03519342		2333.38	0.00185641		2863.38	0.01401241		3393.37	0.01413024		3923.37	0.03603482
213.6	0.00982654		743.59	0.02342554		1273.59	0.03189982		1803.59	0.03526911		2333.58	0.00187163		2863.58	0.01399241		3393.57	0.01435577		3923.57	0.03536009
213.8	0.01014341		743.79	0.0234928		1273.79	0.03225908		1803.79	0.03511599		2333.78	0.00144965		2863.78	0.01365243		3393.77	0.01439666		3923.77	0.03616433
214	0.01083694		743.99	0.023254		1273.99	0.03248907		1803.99	0.03594402		2333.98	0.00069098		2863.98	0.01374069		3393.97	0.01458786		3923.97	0.03615924
214.2	0.01092094		744.19	0.02277107		1274.19	0.03247719		1804.19	0.03608645		2334.18	0.00093304		2864.18	0.01277498		3394.17	0.0146641		3924.17	0.03617325
214.4	0.01067499		744.39	0.02233724		1274.39	0.03220108		1804.39	0.03609527		2334.38	0.00038045		2864.38	0.01241794		3394.37	0.01525198		3924.37	0.03661521
214.6	0.01019212		744.59	0.02205609		1274.59	0.03281512		1804.59	0.03738436		2334.58	0.00040844		2864.58	0.01305836		3394.57	0.01535017		3924.57	0.03785159
214.8	0.01027209		744.79	0.02158614		1274.79	0.03253072		1804.79	0.03727539		2334.78	0.00010938		2864.78	0.01269332		3394.77	0.01546347		3924.77	0.03812119
215	0.01017555		744.99	0.02171176		1274.99	0.03320716		1804.99	0.03840269		2334.98	0.00016104		2864.98	0.01315014		3394.97	0.01457159		3924.97	0.03910862
215.2	0.01081942		745.19	0.02125453		1275.19	0.03319335		1805.19	0.03935231		2335.18	0.00056062		2865.18	0.01336735		3395.17	0.01439398		3925.17	0.03960407
215.4	0.0107872		745.39	0.02075087		1275.39	0.03372731		1805.39	0.03978544		2335.38	0.0010794		2865.38	0.01421974		3395.37	0.01416314		3925.37	0.03901001
215.6	0.01075377		745.59	0.02043928		1275.59	0.03425924		1805.59	0.03992503		2335.58	0.00211014		2865.58	0.01431233		3395.57	0.01429465		3925.57	0.0398519
215.8	0.01107875		745.79	0.02059329		1275.79	0.03454836		1805.79	0.04045957		2335.78	0.00288479		2865.78	0.01499393		3395.77	0.01411949		3925.77	0.04061648
216	0.01140984		745.99	0.02141058		1275.99	0.03469958		1805.99	0.04070784		2335.98	0.00394826		2865.98	0.01471683		3395.97	0.0142194		3925.97	0.04093828
216.2	0.01127304		746.19	0.02195793		1276.19	0.03508744		1806.19	0.04126302		2336.18	0.00448443		2866.18	0.01514962		3396.17	0.01373896		3926.17	0.04134893
216.4	0.01111163		746.39	0.02226243		1276.39	0.03484415		1806.39	0.04317364		2336.38	0.00483103		2866.38	0.01532168		3396.37	0.01313667		3926.37	0.04208337
216.6	0.01201914		746.59	0.0231892		1276.59	0.03454451		1806.59	0.04432924		2336.58	0.00527829		2866.58	0.01518104		3396.57	0.01375582		3926.57	0.0433814
216.8	0.01192269		746.79	0.02399398		1276.79	0.03595589		1806.79	0.04509413		2336.78	0.00547442		2866.78	0.01518552		3396.77	0.0135736		3926.77	0.04420129
217	0.01202517		746.99	0.02510715		1276.99	0.03677952		1806.99	0.0466154		2336.98	0.0053124		2866.98	0.01582272		3396.97	0.01374844		3926.97	0.04463444
217.2	0.01204735		747.19	0.02526507		1277.19	0.03768616		1807.19	0.04652068		2337.18	0.00547014		2867.18	0.01621186		3397.17	0.01370574		3927.17	0.04491729
217.4	0.0125992		747.39	0.02540284		1277.39	0.037653		1807.39	0.04680722		2337.38	0.00583864		2867.38	0.01757486		3397.37	0.01350352		3927.37	0.04563527
217.6	0.01250327		747.59	0.02566649		1277.59	0.03848383		1807.59	0.04617933		2337.58	0.00600074		2867.58	0.017463		3397.57	0.01436257		3927.57	0.04575152
217.8	0.01268781		747.79	0.02511525		1277.79	0.0387435		1807.79	0.04574204		2337.78	0.0042754		2867.78	0.01783661		3397.77	0.01402689		3927.77	0.04682505
218	0.01253047		747.99	0.02472405		1277.99	0.03868281		1807.99	0.04518047		2337.98	0.00345602		2867.98	0.01729906		3397.97	0.01478763		3927.97	0.04713544
218.2	0.01225732		748.19	0.02391185		1278.19	0.0391068		1808.19	0.04476336		2338.18	0.00324038		2868.18	0.01774348		3398.17	0.01523484		3928.17	0.04838325
218.4	0.01247082		748.39	0.02321027		1278.39	0.03823348		1808.39	0.04471162		2338.38	0.00262943		2868.38	0.01875487		3398.37	0.01596548		3928.37	0.04952633
218.6	0.01231793		748.59	0.02315087		1278.59	0.03871016		1808.59	0.04474074		2338.58	0.00295141		2868.58	0.01945294		3398.57	0.01562653		3928.57	0.04938017
218.8	0.01245035		748.79	0.02215281		1278.79	0.03828633		1808.79	0.04376095		2338.78	0.00343464		2868.78	0.01878642		3398.77	0.01538826		3928.77	0.05051492
219	0.01262541		748.99	0.02183731		1278.99	0.03838137		1808.99	0.04354367		2338.98	0.00322087		2868.98	0.01926256		3398.97	0.01500012		3928.97	0.05169924
219.2	0.01380702		749.19	0.02224356		1279.19	0.03778478		1809.19	0.04358952		2339.18	0.00332576		2869.18	0.01956562		3399.17	0.01480527		3929.17	0.05116394
219.4	0.01281937		749.39	0.02229297		1279.39	0.03821308		1809.39	0.04315598		2339.38	0.0034568		2869.38	0.01889504		3399.37	0.01460785		3929.37	0.05102944
219.6	0.01236767		749.59	0.02218059		1279.59	0.03828629		1809.59	0.04341374		2339.58	0.00378147		2869.58	0.01806866		3399.57	0.01449444		3929.57	0.05076084
219.8	0.01177329		749.79	0.02277187		1279.79	0.03777223		1809.79	0.04379976		2339.78	0.00427152		2869.78	0.01784665		3399.77	0.01384236		3929.77	0.05048017
220	0.01132739		749.99	0.02398483		1279.99	0.0377476		1809.99	0.04493795		2339.98	0.00459871		2869.98	0.01689765		3399.97	0.01307266		3929.97	0.05038907
220.2	0.01005016		750.19	0.02501126		1280.19	0.0373024		1810.19	0.04587382		2340.18	0.00450239		2870.18	0.01767475		3400.17	0.01198389		3930.17	0.05029965
220.4	0.00921392		750.39	0.02642674		1280.39	0.03697129		1810.39	0.04611722		2340.38	0.00457815		2870.38	0.01716128		3400.37	0.0127479		3930.37	0.05078088
220.6	0.00947743		750.59	0.02795569		1280.59	0.03730293		1810.59	0.046257		2340.58	0.00541615		2870.58	0.01723892		3400.57	0.013483		3930.57	0.04995312
220.8	0.00901942		750.79	0.02822962		1280.79	0.03812298		1810.79	0.04624258		2340.78	0.00630741		2870.78	0.01735312		3400.77	0.01392627		3930.77	0.0497741
221	0.00979189		750.99	0.02878778		1280.99	0.03858617		1810.99	0.04635721		2340.98	0.00729251		2870.98	0.01751649		3400.97	0.01483642		3930.97	0.04869616
221.2	0.00961459		751.19	0.02874764		1281.19	0.03867364		1811.19	0.04593406		2341.18	0.00739831		2871.18	0.01772487		3401.17	0.01565081		3931.17	0.04813359
221.4	0.01011544		751.39	0.02882543		1281.39	0.0391768		1811.39	0.04638821		2341.38	0.00723562		2871.38	0.01874748		3401.37	0.01676028		3931.37	0.04786304
221.6	0.00887412		751.59	0.028863		1281.59	0.03987737		1811.59	0.04638943		2341.58	0.00648713		2871.58	0.01891058		3401.57	0.01813019		3931.57	0.04859445
221.8	0.00824277		751.79	0.02839652		1281.79	0.04047268		1811.79	0.04701374		2341.78	0.00575008		2871.78	0.01910611		3401.77	0.01814467		3931.77	0.04871047
222	0.00791281		751.99	0.02777145		1281.99	0.04053671		1811.99	0.04671354		2341.98	0.00617128		2871.98	0.01882506		3401.97	0.01903339		3931.97	0.04888244
222.2	0.00855558		752.19	0.02651185		1282.19	0.0410461		1812.19	0.0475882		2342.18	0.00619251		2872.18	0.02057435		3402.17	0.01930299		3932.17	0.05038146
222.4	0.0087569		752.39	0.02549098		1282.39	0.04068194		1812.39	0.04809246		2342.38	0.00630229		2872.38	0.02084346		3402.37	0.02007302		3932.37	0.05168231
222.6	0.00927522		752.59	0.02504865		1282.59	0.04055429		1812.59	0.04808802		2342.58	0.00656698		2872.58	0.02070495		3402.57	0.021177		3932.57	0.05268724
222.8	0.00936977		752.79	0.02379608		1282.79	0.04134224		1812.79	0.04813981		2342.78	0.00656894		2872.78	0.02045295		3402.77	0.02198869		3932.77	0.05422073
223	0.01016256		752.99	0.0238642		1282.99	0.04237577		1812.99	0.04801791		2342.98	0.00577563		2872.98	0.02008563		3402.97	0.02257834		3932.97	0.05439141
223.2	0.01040308		753.19	0.02337287		1283.19	0.04262279		1813.19	0.04851079		2343.18	0.00632734		2873.18	0.01983957		3403.17	0.02253914		3933.17	0.05460792
223.4	0.01003814		753.39	0.02210837		1283.39	0.04297536		1813.39	0.04873821		2343.38	0.00645196		2873.38	0.01902054		3403.37	0.02268228		3933.37	0.05510274
223.6	0.01078863		753.59	0.02149626		1283.59	0.04273845		1813.59	0.04972583		2343.58	0.00716163		2873.58	0.01790632		3403.57	0.02268444		3933.57	0.05547929
223.8	0.01029152		753.79	0.02187908		1283.79	0.04311297		1813.79	0.0509116		2343.78	0.00773677		2873.78	0.01812984		3403.77	0.02224375		3933.77	0.05561113
224	0.01122172		753.99	0.02242912		1283.99	0.04382197		1813.99	0.05118817		2343.98	0.00748592		2873.98	0.01878797		3403.97	0.02146294		3933.97	0.05697886
224.2	0.01087747		754.19	0.02259006		1284.19	0.04405559		1814.19	0.05059653		2344.18	0.00799449		2874.18	0.01944492		3404.17	0.02148292		3934.17	0.05656232
224.4	0.01184977		754.39	0.02375284		1284.39	0.04506867		1814.39	0.05026136		2344.38	0.00798534		2874.38	0.01981315		3404.37	0.02248171		3934.37	0.05736701
224.6	0.01242198		754.59	0.02423223		1284.59	0.04593816		1814.59	0.05090926		2344.58	0.00798262		2874.58	0.02026683		3404.57	0.02270007		3934.57	0.05641077
224.8	0.01266754		754.79	0.02401401		1284.79	0.04549316		1814.79	0.05071607		2344.78	0.0081847		2874.78	0.02055167		3404.77	0.02223993		3934.77	0.05683924
225	0.01400385		754.99	0.02432757		1284.99	0.04595077		1814.99	0.05127303		2344.98	0.00809247		2874.98	0.02169336		3404.97	0.0222031		3934.97	0.05542506
225.2	0.01362798		755.19	0.02518774		1285.19	0.04649835		1815.19	0.05197418		2345.18	0.00669659		2875.18	0.02170083		3405.17	0.02200543		3935.17	0.05482254
225.4	0.01338663		755.39	0.02594198		1285.39	0.04702005		1815.39	0.05231374		2345.38	0.00666526		2875.38	0.02273685		3405.37	0.02212226		3935.37	0.05543617
225.6	0.01321358		755.59	0.02645952		1285.59	0.04761626		1815.59	0.05244695		2345.58	0.00541116		2875.58	0.02294741		3405.57	0.02198492		3935.57	0.0562384
225.8	0.01304368		755.79	0.02655696		1285.79	0.04753028		1815.79	0.05315005		2345.78	0.00521685		2875.78	0.02292704		3405.77	0.02137972		3935.77	0.05663443
226	0.01313526		755.99	0.02683029		1285.99	0.04656225		1815.99	0.05274979		2345.98	0.00478023		2875.98	0.02391834		3405.97	0.02165697		3935.97	0.05785951
226.2	0.01364516		756.19	0.02708675		1286.19	0.04607666		1816.19	0.05345489		2346.18	0.00488657		2876.18	0.02495293		3406.17	0.02178143		3936.17	0.05835167
226.4	0.01382024		756.39	0.02722509		1286.39	0.04519532		1816.39	0.05393039		2346.38	0.00523823		2876.38	0.02450269		3406.37	0.02260849		3936.37	0.05966853
226.6	0.01301695		756.59	0.02738741		1286.59	0.04426326		1816.59	0.05353843		2346.58	0.00616785		2876.58	0.02474054		3406.57	0.0230617		3936.57	0.06047256
226.8	0.01257626		756.79	0.02757378		1286.79	0.04494289		1816.79	0.05324296		2346.78	0.00699622		2876.78	0.02389066		3406.77	0.02316898		3936.77	0.06073573
227	0.0131073		756.99	0.02766552		1286.99	0.0445899		1816.99	0.05303269		2346.98	0.00780786		2876.98	0.02312609		3406.97	0.02343803		3936.97	0.0613286
227.2	0.01323084		757.19	0.02712059		1287.19	0.04363412		1817.19	0.05359062		2347.18	0.00885702		2877.18	0.02368412		3407.17	0.02319212		3937.17	0.06206176
227.4	0.01323491		757.39	0.02693619		1287.39	0.04383576		1817.39	0.05340534		2347.38	0.0090045		2877.38	0.02389268		3407.37	0.02356593		3937.37	0.06277661
227.6	0.01304026		757.59	0.02703004		1287.59	0.04416786		1817.59	0.05386992		2347.58	0.01018096		2877.58	0.0242176		3407.57	0.02374428		3937.57	0.0635785
227.8	0.0116436		757.79	0.02672544		1287.79	0.04527755		1817.79	0.0543487		2347.78	0.01025334		2877.78	0.02491501		3407.77	0.0227208		3937.77	0.06394246
228	0.01176136		757.99	0.0268763		1287.99	0.04594004		1817.99	0.05366512		2347.98	0.01132538		2877.98	0.0257847		3407.97	0.02280824		3937.97	0.06505762
228.2	0.01211771		758.19	0.02684644		1288.19	0.04725625		1818.19	0.05341745		2348.18	0.0120554		2878.18	0.0254117		3408.17	0.02299869		3938.17	0.06454987
228.4	0.01200624		758.39	0.02734783		1288.39	0.04786864		1818.39	0.05396151		2348.38	0.01227399		2878.38	0.02621089		3408.37	0.02304291		3938.37	0.06529573
228.6	0.0122654		758.59	0.02734708		1288.59	0.04844142		1818.59	0.05363815		2348.58	0.0126912		2878.58	0.02642923		3408.57	0.0230511		3938.57	0.06459928
228.8	0.01224905		758.79	0.02672104		1288.79	0.04879954		1818.79	0.05384975		2348.78	0.01236755		2878.78	0.02658142		3408.77	0.02240161		3938.77	0.06431216
229	0.01264621		758.99	0.02714853		1288.99	0.05028635		1818.99	0.05497859		2348.98	0.01225402		2878.98	0.02751152		3408.97	0.02255306		3938.97	0.06392473
229.2	0.01309286		759.19	0.02709751		1289.19	0.05124862		1819.19	0.05509126		2349.18	0.01189316		2879.18	0.02741878		3409.17	0.02291714		3939.17	0.0638245
229.4	0.01372662		759.39	0.02692601		1289.39	0.05161135		1819.39	0.05558902		2349.38	0.01210466		2879.38	0.0277683		3409.37	0.02297448		3939.37	0.06470687
229.6	0.01389541		759.59	0.02741199		1289.59	0.05272991		1819.59	0.05624614		2349.58	0.01002738		2879.58	0.02747874		3409.57	0.0230024		3939.57	0.06482531
229.8	0.01377146		759.79	0.02672716		1289.79	0.05187158		1819.79	0.05677768		2349.78	0.01023252		2879.78	0.02769217		3409.77	0.02218634		3939.77	0.06638605
230	0.01386979		759.99	0.02595032		1289.99	0.05151415		1819.99	0.05687856		2349.98	0.00968593		2879.98	0.02800357		3409.97	0.02117745		3939.97	0.06630451
230.2	0.01428523		760.19	0.02545385		1290.19	0.05163516		1820.19	0.05734718		2350.18	0.0096617		2880.18	0.02757062		3410.17	0.02024721		3940.17	0.06643304
230.4	0.01435999		760.39	0.02596194		1290.39	0.05100893		1820.39	0.05715229		2350.38	0.0093506		2880.38	0.02724773		3410.37	0.02089635		3940.37	0.06812167
230.6	0.01313376		760.59	0.02526945		1290.59	0.05105363		1820.59	0.05689879		2350.58	0.00928669		2880.58	0.02741728		3410.57	0.02116617		3940.57	0.06842786
230.8	0.01374178		760.79	0.02529702		1290.79	0.05100821		1820.79	0.05673306		2350.78	0.00925464		2880.78	0.02698408		3410.77	0.02098108		3940.77	0.0688313
231	0.01362546		760.99	0.02532733		1290.99	0.05068853		1820.99	0.05668101		2350.98	0.00862152		2880.98	0.02775881		3410.97	0.0212091		3940.97	0.06975521
231.2	0.01332632		761.19	0.02494063		1291.19	0.04996428		1821.19	0.05587785		2351.18	0.00817841		2881.18	0.02801253		3411.17	0.02101838		3941.17	0.0704559
231.4	0.01220175		761.39	0.02419816		1291.39	0.05006839		1821.39	0.05613208		2351.38	0.00849166		2881.38	0.02793988		3411.37	0.02151609		3941.37	0.07181661
231.6	0.01149174		761.59	0.02393103		1291.59	0.05011309		1821.59	0.05698973		2351.58	0.00923932		2881.58	0.02835114		3411.57	0.021407		3941.57	0.07209416
231.8	0.01033066		761.79	0.02376552		1291.79	0.05017234		1821.79	0.05757615		2351.78	0.0098076		2881.78	0.0280004		3411.77	0.02028511		3941.77	0.07250059
232	0.01087208		761.99	0.02432491		1291.99	0.0497406		1821.99	0.05808969		2351.98	0.01110748		2881.98	0.02786541		3411.97	0.02084356		3941.97	0.07229249
232.2	0.01137244		762.19	0.02484942		1292.19	0.05051503		1822.19	0.05819784		2352.18	0.01100794		2882.18	0.02875221		3412.17	0.02090983		3942.17	0.07195718
232.4	0.01105784		762.39	0.0259329		1292.39	0.05028356		1822.39	0.05857244		2352.38	0.01127475		2882.38	0.02987711		3412.37	0.02025428		3942.37	0.07256693
232.6	0.01116406		762.59	0.02549762		1292.59	0.05078515		1822.59	0.0584836		2352.58	0.01113263		2882.58	0.03034828		3412.57	0.02086431		3942.57	0.07237334
232.8	0.01124809		762.79	0.02527702		1292.79	0.05160328		1822.79	0.05978443		2352.78	0.01048261		2882.78	0.0302678		3412.77	0.02087885		3942.77	0.07263713
233	0.01257104		762.99	0.02623529		1292.99	0.05260454		1822.99	0.06036254		2352.98	0.01120147		2882.98	0.03051372		3412.97	0.0211481		3942.97	0.07274831
233.2	0.01349852		763.19	0.0257856		1293.19	0.05405484		1823.19	0.06022716		2353.18	0.01153305		2883.18	0.03034112		3413.17	0.02167664		3943.17	0.07276433
233.4	0.01313057		763.39	0.0260685		1293.39	0.05524431		1823.39	0.06028323		2353.38	0.0113586		2883.38	0.02990081		3413.37	0.02154613		3943.37	0.07323239
233.6	0.013024		763.59	0.02695991		1293.59	0.05636303		1823.59	0.06042151		2353.58	0.01056269		2883.58	0.0301778		3413.57	0.02212676		3943.57	0.07359755
233.8	0.01356994		763.79	0.02616618		1293.79	0.05616981		1823.79	0.0602032		2353.78	0.01129199		2883.78	0.03067024		3413.77	0.02212955		3943.77	0.07479334
234	0.01325383		763.99	0.02622915		1293.99	0.05750434		1823.99	0.06049833		2353.98	0.01079715		2883.98	0.03097492		3413.97	0.02224923		3943.97	0.07480964
234.2	0.01310126		764.19	0.02725513		1294.19	0.05717327		1824.19	0.06047335		2354.18	0.01024003		2884.18	0.02995945		3414.17	0.02263564		3944.17	0.07505138
234.4	0.01340894		764.39	0.02817505		1294.39	0.05711233		1824.39	0.06101726		2354.38	0.01011669		2884.38	0.02975202		3414.37	0.02369325		3944.37	0.07532549
234.6	0.01347746		764.59	0.02730929		1294.59	0.05713414		1824.59	0.06150715		2354.58	0.00984441		2884.58	0.02970933		3414.57	0.02401955		3944.57	0.07541201
234.8	0.0144345		764.79	0.02781261		1294.79	0.0570669		1824.79	0.06085885		2354.78	0.01036161		2884.78	0.02944452		3414.77	0.02403752		3944.77	0.07633274
235	0.01562346		764.99	0.02729469		1294.99	0.05717071		1824.99	0.06166492		2354.98	0.01037875		2884.98	0.02907631		3414.97	0.02429301		3944.97	0.07729587
235.2	0.0160853		765.19	0.02682635		1295.19	0.05671569		1825.19	0.06172097		2355.18	0.00965835		2885.18	0.02819498		3415.17	0.02426682		3945.17	0.07735495
235.4	0.01623382		765.39	0.02698606		1295.39	0.0569355		1825.39	0.0628591		2355.38	0.00956013		2885.38	0.02749245		3415.37	0.02452528		3945.37	0.07784538
235.6	0.01750909		765.59	0.02722996		1295.59	0.05701312		1825.59	0.0636355		2355.58	0.00975046		2885.58	0.02799153		3415.57	0.02374791		3945.57	0.07718956
235.8	0.01735386		765.79	0.02835845		1295.79	0.05688065		1825.79	0.06424681		2355.78	0.00996145		2885.78	0.0271162		3415.77	0.02368227		3945.77	0.07675633
236	0.01823526		765.99	0.0293085		1295.99	0.05678177		1825.99	0.06456785		2355.98	0.00932618		2885.98	0.02700487		3415.97	0.02370627		3945.97	0.07637403
236.2	0.01834424		766.19	0.03021162		1296.19	0.05715802		1826.19	0.06409815		2356.18	0.00937842		2886.18	0.02801469		3416.17	0.02378172		3946.17	0.07708334
236.4	0.01819076		766.39	0.03026853		1296.39	0.05600134		1826.39	0.06391798		2356.38	0.00888851		2886.38	0.02718618		3416.37	0.0239214		3946.37	0.07735506
236.6	0.01774977		766.59	0.02843235		1296.59	0.0563308		1826.59	0.0641348		2356.58	0.00888509		2886.58	0.02645178		3416.57	0.02502927		3946.57	0.07588422
236.8	0.01846513		766.79	0.02819978		1296.79	0.0572167		1826.79	0.06473231		2356.78	0.00892668		2886.78	0.02600877		3416.77	0.02510242		3946.77	0.07497812
237	0.01786169		766.99	0.02902088		1296.99	0.05819079		1826.99	0.06426212		2356.98	0.00983338		2886.98	0.02591334		3416.97	0.02566161		3946.97	0.07393249
237.2	0.01649425		767.19	0.02878745		1297.19	0.05896669		1827.19	0.06444383		2357.18	0.01016351		2887.18	0.02684079		3417.17	0.02639259		3947.17	0.073942
237.4	0.01490792		767.39	0.02981289		1297.39	0.0595173		1827.39	0.06419696		2357.38	0.01044424		2887.38	0.02710755		3417.37	0.02691063		3947.37	0.07386505
237.6	0.01505564		767.59	0.03004385		1297.59	0.05968169		1827.59	0.0644666		2357.58	0.01188058		2887.58	0.0285061		3417.57	0.02744044		3947.57	0.07367641
237.8	0.01467714		767.79	0.029888		1297.79	0.06022031		1827.79	0.06455658		2357.78	0.0127375		2887.78	0.02879012		3417.77	0.02755949		3947.77	0.07449187
238	0.0144404		767.99	0.03021627		1297.99	0.06045713		1827.99	0.06546825		2357.98	0.01269693		2887.98	0.02888575		3417.97	0.02701043		3947.97	0.07497073
238.2	0.01422938		768.19	0.03009929		1298.19	0.06026868		1828.19	0.06625473		2358.18	0.01296898		2888.18	0.02855475		3418.17	0.02654406		3948.17	0.07485888
238.4	0.01547747		768.39	0.02861311		1298.39	0.06037503		1828.39	0.06710712		2358.38	0.01369514		2888.38	0.02962157		3418.37	0.02670414		3948.37	0.0752807
238.6	0.01595088		768.59	0.02732775		1298.59	0.06089153		1828.59	0.06678385		2358.58	0.01389206		2888.58	0.03048287		3418.57	0.02635733		3948.57	0.07669931
238.8	0.01668021		768.79	0.02666223		1298.79	0.06179981		1828.79	0.06664717		2358.78	0.01453182		2888.78	0.03018609		3418.77	0.02576349		3948.77	0.07750216
239	0.0172713		768.99	0.02584011		1298.99	0.06256139		1828.99	0.06741767		2358.98	0.01413068		2888.98	0.02973562		3418.97	0.02564378		3948.97	0.07829584
239.2	0.01743669		769.19	0.02601775		1299.19	0.06242498		1829.19	0.0679348		2359.18	0.01404528		2889.18	0.02971608		3419.17	0.025359		3949.17	0.08001934
239.4	0.01800411		769.39	0.02608658		1299.39	0.06207767		1829.39	0.06778963		2359.38	0.01465683		2889.38	0.03012104		3419.37	0.02499881		3949.37	0.08120469
239.6	0.01825188		769.59	0.0257444		1299.59	0.06184982		1829.59	0.0677696		2359.58	0.01533145		2889.58	0.03106884		3419.57	0.02440497		3949.57	0.08165544
239.8	0.01739581		769.79	0.02647963		1299.79	0.06203825		1829.79	0.06792614		2359.78	0.01450731		2889.78	0.03030484		3419.77	0.02493558		3949.77	0.08283468
240	0.01694572		769.99	0.02584469		1299.99	0.06189164		1829.99	0.06760246		2359.98	0.01419244		2889.98	0.03045967		3419.97	0.02472203		3949.97	0.08350607
240.2	0.01693788		770.19	0.02568551		1300.19	0.06187163		1830.19	0.0671539		2360.18	0.01476257		2890.18	0.03115621		3420.17	0.02439984		3950.17	0.08336618
240.4	0.01666517		770.39	0.0245296		1300.39	0.06106657		1830.39	0.06735387		2360.38	0.01341987		2890.38	0.03097672		3420.37	0.02458302		3950.37	0.08280137
240.6	0.01689921		770.59	0.02323381		1300.59	0.06208782		1830.59	0.06724963		2360.58	0.01337011		2890.58	0.03144187		3420.57	0.0242218		3950.57	0.08261843
240.8	0.01580433		770.79	0.02332466		1300.79	0.06243783		1830.79	0.06739366		2360.78	0.0128944		2890.78	0.03211987		3420.77	0.02431533		3950.77	0.08300142
241	0.01554244		770.99	0.02400477		1300.99	0.0630388		1830.99	0.06719615		2360.98	0.01270639		2890.98	0.03313679		3420.97	0.02384346		3950.97	0.08332952
241.2	0.01461803		771.19	0.02394005		1301.19	0.06376389		1831.19	0.06690394		2361.18	0.01281958		2891.18	0.03416151		3421.17	0.02402864		3951.17	0.08360844
241.4	0.01417938		771.39	0.02469369		1301.39	0.06480397		1831.39	0.06607356		2361.38	0.0132012		2891.38	0.03433683		3421.37	0.02379502		3951.37	0.08378348
241.6	0.01477415		771.59	0.02491102		1301.59	0.06531602		1831.59	0.06640737		2361.58	0.01350195		2891.58	0.03538744		3421.57	0.02396495		3951.57	0.08372671
241.8	0.01503817		771.79	0.02552045		1301.79	0.06663313		1831.79	0.06652617		2361.78	0.01347836		2891.78	0.0356198		3421.77	0.02457325		3951.77	0.08384332
242	0.01612099		771.99	0.02578959		1301.99	0.06703519		1831.99	0.06766266		2361.98	0.01289631		2891.98	0.03598458		3421.97	0.02482591		3951.97	0.08438538
242.2	0.01669765		772.19	0.02500813		1302.19	0.06734335		1832.19	0.06836122		2362.18	0.01293064		2892.18	0.03714502		3422.17	0.02540245		3952.17	0.08474934
242.4	0.01787139		772.39	0.02465823		1302.39	0.06681998		1832.39	0.06875788		2362.38	0.01285646		2892.38	0.03781484		3422.37	0.02506669		3952.37	0.08505848
242.6	0.01847151		772.59	0.02520554		1302.59	0.06782619		1832.59	0.06900506		2362.58	0.01339744		2892.58	0.03750234		3422.57	0.02589142		3952.57	0.08606274
242.8	0.0188698		772.79	0.02571989		1302.79	0.06826316		1832.79	0.06994093		2362.78	0.01462115		2892.78	0.03715817		3422.77	0.02575858		3952.77	0.08635702
243	0.01919907		772.99	0.02614156		1302.99	0.06801967		1832.99	0.07112253		2362.98	0.01463097		2892.98	0.03618431		3422.97	0.02667959		3952.97	0.08723955
243.2	0.01937969		773.19	0.02683045		1303.19	0.06734008		1833.19	0.07237803		2363.18	0.01549336		2893.18	0.03638717		3423.17	0.0258565		3953.17	0.08749402
243.4	0.01925199		773.39	0.02800821		1303.39	0.06656854		1833.39	0.07333143		2363.38	0.0152568		2893.38	0.03640388		3423.37	0.02588356		3953.37	0.08728069
243.6	0.01947265		773.59	0.02847554		1303.59	0.06589166		1833.59	0.07379114		2363.58	0.01603277		2893.58	0.03587518		3423.57	0.02566716		3953.57	0.08694464
243.8	0.01895453		773.79	0.02887877		1303.79	0.06612049		1833.79	0.07510939		2363.78	0.01594402		2893.78	0.03527856		3423.77	0.02515746		3953.77	0.08699995
244	0.01884955		773.99	0.02849158		1303.99	0.06495369		1833.99	0.07545639		2363.98	0.01631875		2893.98	0.03546033		3423.97	0.02469886		3953.97	0.08576646
244.2	0.01946638		774.19	0.02816208		1304.19	0.06433432		1834.19	0.07560331		2364.18	0.01605742		2894.18	0.03477132		3424.17	0.0237589		3954.17	0.08535088
244.4	0.02001576		774.39	0.02814742		1304.39	0.06386262		1834.39	0.07622232		2364.38	0.01563222		2894.38	0.03381544		3424.37	0.0238771		3954.37	0.08632984
244.6	0.01966924		774.59	0.02879785		1304.59	0.06387032		1834.59	0.07581167		2364.58	0.01573723		2894.58	0.03384386		3424.57	0.02336686		3954.57	0.0869503
244.8	0.01837068		774.79	0.02787422		1304.79	0.06344537		1834.79	0.07604683		2364.78	0.01595496		2894.78	0.03375603		3424.77	0.02348337		3954.77	0.08651171
245	0.01846039		774.99	0.02780634		1304.99	0.06399163		1834.99	0.07587234		2364.98	0.0162294		2894.98	0.03450552		3424.97	0.02358931		3954.97	0.08640974
245.2	0.01771925		775.19	0.02728775		1305.19	0.06452079		1835.19	0.075786		2365.18	0.01647302		2895.18	0.03359656		3425.17	0.02447158		3955.17	0.08600545
245.4	0.01801119		775.39	0.02725409		1305.39	0.06507639		1835.39	0.075854		2365.38	0.01575702		2895.38	0.03315026		3425.37	0.02419618		3955.37	0.08602139
245.6	0.0188869		775.59	0.02702924		1305.59	0.06581314		1835.59	0.07593624		2365.58	0.01527127		2895.58	0.03347593		3425.57	0.02487335		3955.57	0.08574504
245.8	0.01988487		775.79	0.02661606		1305.79	0.06714339		1835.79	0.07537605		2365.78	0.01514182		2895.78	0.03420949		3425.77	0.02500386		3955.77	0.08661641
246	0.0212918		775.99	0.02544582		1305.99	0.06741982		1835.99	0.0757359		2365.98	0.01395001		2895.98	0.03523948		3425.97	0.02582755		3955.97	0.0887007
246.2	0.021909		776.19	0.02441517		1306.19	0.06744095		1836.19	0.07510919		2366.18	0.014519		2896.18	0.03707422		3426.17	0.026014		3956.17	0.08988902
246.4	0.0222806		776.39	0.02408445		1306.39	0.06824481		1836.39	0.07471813		2366.38	0.01449217		2896.38	0.03841005		3426.37	0.02607591		3956.37	0.09008558
246.6	0.02228487		776.59	0.02383533		1306.59	0.06911843		1836.59	0.07491919		2366.58	0.01530448		2896.58	0.03899816		3426.57	0.02724883		3956.57	0.09168494
246.8	0.02126941		776.79	0.02360488		1306.79	0.06958525		1836.79	0.07531723		2366.78	0.01586967		2896.78	0.03939763		3426.77	0.02691472		3956.77	0.09241164
247	0.02017685		776.99	0.02435074		1306.99	0.06973887		1836.99	0.07543333		2366.98	0.01543978		2896.98	0.03870844		3426.97	0.02728459		3956.97	0.09269008
247.2	0.01925008		777.19	0.02509511		1307.19	0.06925094		1837.19	0.07538159		2367.18	0.01523312		2897.18	0.03977363		3427.17	0.02701663		3957.17	0.09298233
247.4	0.01948308		777.39	0.02594946		1307.39	0.06785316		1837.39	0.0754334		2367.38	0.01542728		2897.38	0.03989925		3427.37	0.02732552		3957.37	0.09366207
247.6	0.01914396		777.59	0.02547179		1307.59	0.06776698		1837.59	0.0751359		2367.58	0.01641019		2897.58	0.03972598		3427.57	0.02706569		3957.57	0.09321909
247.8	0.01838424		777.79	0.02596024		1307.79	0.06772629		1837.79	0.07622597		2367.78	0.01687181		2897.78	0.04014741		3427.77	0.02644644		3957.77	0.09287204
248	0.01831108		777.99	0.0258737		1307.99	0.06704683		1837.99	0.07602139		2367.98	0.01741914		2897.98	0.03972405		3427.97	0.02669589		3957.97	0.09256612
248.2	0.01821552		778.19	0.02588073		1308.19	0.0671421		1838.19	0.07599428		2368.18	0.01844508		2898.18	0.03896711		3428.17	0.02632202		3958.17	0.0929162
248.4	0.01802969		778.39	0.02722446		1308.39	0.06666818		1838.39	0.07640806		2368.38	0.01874715		2898.38	0.0388663		3428.37	0.0268		3958.37	0.09321192
248.6	0.01635209		778.59	0.02656351		1308.59	0.06651225		1838.59	0.07627133		2368.58	0.01900041		2898.58	0.03951778		3428.57	0.02656977		3958.57	0.09348233
248.8	0.01585481		778.79	0.02582152		1308.79	0.06685759		1838.79	0.07639239		2368.78	0.01916586		2898.78	0.03899348		3428.77	0.02676282		3958.77	0.09378472
249	0.01655744		778.99	0.02634363		1308.99	0.06784584		1838.99	0.07652363		2368.98	0.0195067		2898.98	0.03811389		3428.97	0.02676012		3958.97	0.09367433
249.2	0.0171781		779.19	0.02601149		1309.19	0.06808422		1839.19	0.07657062		2369.18	0.01945056		2899.18	0.03704455		3429.17	0.02652064		3959.17	0.09373189
249.4	0.01752408		779.39	0.02688787		1309.39	0.06868545		1839.39	0.07693673		2369.38	0.0178082		2899.38	0.03755332		3429.37	0.0266604		3959.37	0.09454756
249.6	0.0185403		779.59	0.02700731		1309.59	0.06962668		1839.59	0.07653144		2369.58	0.01837185		2899.58	0.03748216		3429.57	0.02660319		3959.57	0.09528195
249.8	0.01852747		779.79	0.0269613		1309.79	0.0699599		1839.79	0.0766449		2369.78	0.01693832		2899.78	0.03893251		3429.77	0.0266777		3959.77	0.09687416
250	0.01902856		779.99	0.02644302		1309.99	0.07030009		1839.99	0.0765537		2369.98	0.0163775		2899.98	0.03984704		3429.97	0.02706456		3959.97	0.09819855
250.2	0.01920195		780.19	0.02702895		1310.19	0.0707701		1840.19	0.07626959		2370.18	0.0170282		2900.18	0.04061199		3430.17	0.02687236		3960.17	0.09855778
250.4	0.01953884		780.39	0.0267902		1310.39	0.07147073		1840.39	0.07647943		2370.38	0.01670352		2900.38	0.04154025		3430.37	0.02633537		3960.37	0.09904386
250.6	0.0186132		780.59	0.02657117		1310.59	0.07098539		1840.59	0.07687061		2370.58	0.01613387		2900.58	0.04084777		3430.57	0.02621684		3960.57	0.10050989
250.8	0.0178935		780.79	0.02703095		1310.79	0.07119856		1840.79	0.07701651		2370.78	0.01585835		2900.78	0.04000615		3430.77	0.02642025		3960.77	0.10050452
251	0.01765342		780.99	0.02787907		1310.99	0.07185566		1840.99	0.0771225		2370.98	0.01550936		2900.98	0.04006191		3430.97	0.02664633		3960.97	0.10067914
251.2	0.01821478		781.19	0.02772884		1311.19	0.0720206		1841.19	0.07772413		2371.18	0.0155302		2901.18	0.04067884		3431.17	0.02627329		3961.17	0.10111356
251.4	0.0188642		781.39	0.02764795		1311.39	0.07205379		1841.39	0.07791647		2371.38	0.01599405		2901.38	0.0405167		3431.37	0.02626497		3961.37	0.10131135
251.6	0.01884903		781.59	0.02728823		1311.59	0.07329383		1841.59	0.07922858		2371.58	0.01606622		2901.58	0.04036357		3431.57	0.02699717		3961.57	0.10070634
251.8	0.01932572		781.79	0.02721009		1311.79	0.07369022		1841.79	0.08028697		2371.78	0.01633241		2901.78	0.04026297		3431.77	0.02712473		3961.77	0.10084568
252	0.0197068		781.99	0.02639302		1311.99	0.07354952		1841.99	0.08026562		2371.98	0.01639533		2901.98	0.03935228		3431.97	0.02703072		3961.97	0.1005734
252.2	0.02013544		782.19	0.02614712		1312.19	0.07367975		1842.19	0.08133516		2372.18	0.01654578		2902.18	0.03909664		3432.17	0.02717072		3962.17	0.1011665
252.4	0.01986034		782.39	0.02618111		1312.39	0.07395178		1842.39	0.08197526		2372.38	0.01673352		2902.38	0.03851298		3432.37	0.02770267		3962.37	0.10067217
252.6	0.01957682		782.59	0.02558113		1312.59	0.07396756		1842.59	0.08250822		2372.58	0.01684031		2902.58	0.03778541		3432.57	0.02773314		3962.57	0.10135867
252.8	0.01992838		782.79	0.02654758		1312.79	0.07435359		1842.79	0.08310457		2372.78	0.01717014		2902.78	0.03740344		3432.77	0.02801596		3962.77	0.10154393
253	0.02062561		782.99	0.02669762		1312.99	0.07482525		1842.99	0.08431794		2372.98	0.01856069		2902.98	0.03724399		3432.97	0.02855767		3962.97	0.10060442
253.2	0.01991298		783.19	0.02809072		1313.19	0.07539532		1843.19	0.08521588		2373.18	0.01853137		2903.18	0.03716439		3433.17	0.02921025		3963.17	0.10130276
253.4	0.0193695		783.39	0.02927073		1313.39	0.0760171		1843.39	0.08579506		2373.38	0.01807651		2903.38	0.03683695		3433.37	0.02989111		3963.37	0.10183645
253.6	0.01920137		783.59	0.02965985		1313.59	0.07561698		1843.59	0.08533744		2373.58	0.01978896		2903.58	0.03666258		3433.57	0.0297354		3963.57	0.10208595
253.8	0.01875772		783.79	0.02970018		1313.79	0.07498576		1843.79	0.08488948		2373.78	0.01912238		2903.78	0.0376919		3433.77	0.03040378		3963.77	0.10339835
254	0.0189144		783.99	0.02970624		1313.99	0.07538043		1843.99	0.08460385		2373.98	0.02056571		2903.98	0.03797582		3433.97	0.02988838		3963.97	0.10438866
254.2	0.01928582		784.19	0.03044451		1314.19	0.0752004		1844.19	0.08436248		2374.18	0.02139553		2904.18	0.03868863		3434.17	0.02974122		3964.17	0.1048158
254.4	0.01936591		784.39	0.03018218		1314.39	0.07492555		1844.39	0.08391433		2374.38	0.02088744		2904.38	0.03859953		3434.37	0.02888922		3964.37	0.10535756
254.6	0.01879359		784.59	0.03025999		1314.59	0.07450186		1844.59	0.0833278		2374.58	0.02055926		2904.58	0.03853372		3434.57	0.02918589		3964.57	0.10604118
254.8	0.01920604		784.79	0.03036074		1314.79	0.07477446		1844.79	0.08309447		2374.78	0.02053961		2904.78	0.03902562		3434.77	0.02969787		3964.77	0.10630792
255	0.01997172		784.99	0.0298576		1314.99	0.07514215		1844.99	0.08316465		2374.98	0.02125254		2904.98	0.04011529		3434.97	0.02909927		3964.97	0.10701187
255.2	0.02033968		785.19	0.0293122		1315.19	0.07430138		1845.19	0.08230525		2375.18	0.02151074		2905.18	0.04037583		3435.17	0.02819215		3965.17	0.10740014
255.4	0.02033519		785.39	0.02898105		1315.39	0.07305615		1845.39	0.08133456		2375.38	0.02011942		2905.38	0.04071541		3435.37	0.02877278		3965.37	0.10719602
255.6	0.02096321		785.59	0.02857396		1315.59	0.07297085		1845.59	0.08130852		2375.58	0.01946716		2905.58	0.04096107		3435.57	0.02891107		3965.57	0.10636349
255.8	0.0213535		785.79	0.02885688		1315.79	0.07292179		1845.79	0.08044875		2375.78	0.01886249		2905.78	0.04147497		3435.77	0.02869458		3965.77	0.10632923
256	0.02062809		785.99	0.02952711		1315.99	0.07209643		1845.99	0.08027691		2375.98	0.0183976		2905.98	0.04220744		3435.97	0.02721327		3965.97	0.10578461
256.2	0.02033472		786.19	0.02990586		1316.19	0.07206354		1846.19	0.08007433		2376.18	0.01867337		2906.18	0.04254063		3436.17	0.02768706		3966.17	0.10525754
256.4	0.02020546		786.39	0.03015232		1316.39	0.07205208		1846.39	0.07960421		2376.38	0.01816258		2906.38	0.04158271		3436.37	0.02774305		3966.37	0.10418626
256.6	0.01986843		786.59	0.03057255		1316.59	0.07197536		1846.59	0.07934469		2376.58	0.0175562		2906.58	0.04251289		3436.57	0.02769069		3966.57	0.10484432
256.8	0.01974201		786.79	0.03099938		1316.79	0.07261908		1846.79	0.07981383		2376.78	0.0184052		2906.78	0.04332245		3436.77	0.02771678		3966.77	0.10477345
257	0.01957322		786.99	0.03171791		1316.99	0.07380435		1846.99	0.08045371		2376.98	0.018681		2906.98	0.04397488		3436.97	0.02738712		3966.97	0.10503543
257.2	0.01793534		787.19	0.03237452		1317.19	0.07412458		1847.19	0.080325		2377.18	0.01783772		2907.18	0.04369783		3437.17	0.02758098		3967.17	0.1058004
257.4	0.01736352		787.39	0.03187505		1317.39	0.07414365		1847.39	0.08079898		2377.38	0.01829127		2907.38	0.04320407		3437.37	0.02769805		3967.37	0.10596249
257.6	0.01772004		787.59	0.03164103		1317.59	0.07325983		1847.59	0.08160441		2377.58	0.01885748		2907.58	0.04364128		3437.57	0.02755439		3967.57	0.10626176
257.8	0.01805113		787.79	0.03045506		1317.79	0.07413568		1847.79	0.0826277		2377.78	0.01934537		2907.78	0.04367146		3437.77	0.02748315		3967.77	0.10694261
258	0.01836691		787.99	0.03004437		1317.99	0.07483569		1847.99	0.08338054		2377.98	0.02014743		2907.98	0.04352442		3437.97	0.02749417		3967.97	0.10792197
258.2	0.01857154		788.19	0.03042077		1318.19	0.07494919		1848.19	0.08374385		2378.18	0.02025198		2908.18	0.04368808		3438.17	0.02725811		3968.17	0.10855325
258.4	0.01835446		788.39	0.02958505		1318.39	0.07596781		1848.39	0.08406365		2378.38	0.02042437		2908.38	0.04410904		3438.37	0.02809442		3968.37	0.10946847
258.6	0.018929		788.59	0.02871343		1318.59	0.07580184		1848.59	0.0846261		2378.58	0.02056051		2908.58	0.04464976		3438.57	0.02885911		3968.57	0.10987568
258.8	0.01940332		788.79	0.02828134		1318.79	0.07622303		1848.79	0.0854291		2378.78	0.02137922		2908.78	0.04442793		3438.77	0.02940822		3968.77	0.11054119
259	0.01983874		788.99	0.0275947		1318.99	0.07566177		1848.99	0.08586401		2378.98	0.02146054		2908.98	0.04503341		3438.97	0.02975691		3968.97	0.11124057
259.2	0.01980179		789.19	0.0276325		1319.19	0.07524728		1849.19	0.08603267		2379.18	0.02155143		2909.18	0.0451675		3439.17	0.03023136		3969.17	0.11148862
259.4	0.01980532		789.39	0.02831899		1319.39	0.07597624		1849.39	0.0859579		2379.38	0.02044144		2909.38	0.04512847		3439.37	0.03104479		3969.37	0.11119138
259.6	0.02011118		789.59	0.02837352		1319.59	0.07716463		1849.59	0.08595307		2379.58	0.02091998		2909.58	0.04532033		3439.57	0.03169412		3969.57	0.11195761
259.8	0.01939603		789.79	0.02880082		1319.79	0.07753104		1849.79	0.08575875		2379.78	0.02113894		2909.78	0.0451948		3439.77	0.03267018		3969.77	0.11239298
260	0.01813483		789.99	0.02899361		1319.99	0.07855054		1849.99	0.08614829		2379.98	0.02078713		2909.98	0.04601097		3439.97	0.03221581		3969.97	0.11198324
260.2	0.01922595		790.19	0.02898528		1320.19	0.07886905		1850.19	0.08570775		2380.18	0.02133586		2910.18	0.04526802		3440.17	0.03359245		3970.17	0.11138865
260.4	0.01969872		790.39	0.0290371		1320.39	0.07939442		1850.39	0.08541497		2380.38	0.02094308		2910.38	0.04514759		3440.37	0.03374692		3970.37	0.11195737
260.6	0.01979105		790.59	0.02945626		1320.59	0.07989438		1850.59	0.08488074		2380.58	0.02178048		2910.58	0.04671947		3440.57	0.03382684		3970.57	0.11270693
260.8	0.02024135		790.79	0.02913514		1320.79	0.08061044		1850.79	0.08549129		2380.78	0.02128937		2910.78	0.04763513		3440.77	0.03353851		3970.77	0.11342105
261	0.0198954		790.99	0.03006791		1320.99	0.08190106		1850.99	0.08640524		2380.98	0.01984722		2910.98	0.04844343		3440.97	0.03281808		3970.97	0.11430789
261.2	0.01963428		791.19	0.02974174		1321.19	0.08171072		1851.19	0.08788896		2381.18	0.01935858		2911.18	0.04877625		3441.17	0.03183524		3971.17	0.11448042
261.4	0.02116694		791.39	0.0297902		1321.39	0.0819105		1851.39	0.08900709		2381.38	0.01991456		2911.38	0.04903151		3441.37	0.03134896		3971.37	0.11440023
261.6	0.02222707		791.59	0.02906437		1321.59	0.08242993		1851.59	0.09002379		2381.58	0.02019589		2911.58	0.05024373		3441.57	0.03039286		3971.57	0.11440071
261.8	0.02225592		791.79	0.02887109		1321.79	0.0831679		1851.79	0.0899485		2381.78	0.02024285		2911.78	0.0503538		3441.77	0.02965704		3971.77	0.11447588
262	0.0223999		791.99	0.02915398		1321.99	0.0833432		1851.99	0.08966074		2381.98	0.02039143		2911.98	0.05127395		3441.97	0.03001408		3971.97	0.11519145
262.2	0.02225206		792.19	0.02961742		1322.19	0.0831121		1852.19	0.08907029		2382.18	0.02084934		2912.18	0.05216374		3442.17	0.02948371		3972.17	0.11536022
262.4	0.02204278		792.39	0.02985649		1322.39	0.08409106		1852.39	0.08911052		2382.38	0.02127104		2912.38	0.05288729		3442.37	0.02970729		3972.37	0.11616225
262.6	0.02187494		792.59	0.03039425		1322.59	0.08300996		1852.59	0.08938561		2382.58	0.0208393		2912.58	0.05236245		3442.57	0.02887153		3972.57	0.11559208
262.8	0.02064502		792.79	0.03102847		1322.79	0.08291792		1852.79	0.08961288		2382.78	0.02117826		2912.78	0.05261163		3442.77	0.02852658		3972.77	0.11590836
263	0.02018365		792.99	0.03109354		1322.99	0.08312555		1852.99	0.09005726		2382.98	0.02105425		2912.98	0.05231325		3442.97	0.02823145		3972.97	0.11584153
263.2	0.01929796		793.19	0.0310816		1323.19	0.08341503		1853.19	0.0900368		2383.18	0.02067826		2913.18	0.05139444		3443.17	0.02827936		3973.17	0.11662925
263.4	0.01833851		793.39	0.03084407		1323.39	0.08284075		1853.39	0.08981861		2383.38	0.0201737		2913.38	0.05040956		3443.37	0.02867407		3973.37	0.11702307
263.6	0.01828302		793.59	0.0308368		1323.59	0.0825174		1853.59	0.0904464		2383.58	0.02118581		2913.58	0.04981684		3443.57	0.02973266		3973.57	0.11751789
263.8	0.01740551		793.79	0.03116365		1323.79	0.08221866		1853.79	0.09028737		2383.78	0.02166536		2913.78	0.04917118		3443.77	0.03022083		3973.77	0.11634792
264	0.01676582		793.99	0.03154924		1323.99	0.08290249		1853.99	0.09050732		2383.98	0.02141886		2913.98	0.0494838		3443.97	0.03106249		3973.97	0.1156654
264.2	0.01723274		794.19	0.03251988		1324.19	0.08170982		1854.19	0.0901984		2384.18	0.02180442		2914.18	0.0477174		3444.17	0.03178977		3974.17	0.11581486
264.4	0.01637464		794.39	0.03279788		1324.39	0.08131359		1854.39	0.09005901		2384.38	0.02188948		2914.38	0.04769662		3444.37	0.03202169		3974.37	0.1163629
264.6	0.01618517		794.59	0.03305346		1324.59	0.0817792		1854.59	0.09053505		2384.58	0.02198773		2914.58	0.04754683		3444.57	0.03234223		3974.57	0.11692092
264.8	0.01542461		794.79	0.03254529		1324.79	0.08176528		1854.79	0.09189342		2384.78	0.02079972		2914.78	0.04777611		3444.77	0.03242074		3974.77	0.11840151
265	0.01578553		794.99	0.03352086		1324.99	0.08215415		1854.99	0.0932851		2384.98	0.02044334		2914.98	0.04799572		3444.97	0.03199665		3974.97	0.11916748
265.2	0.017018		795.19	0.03298192		1325.19	0.0815404		1855.19	0.09392742		2385.18	0.02088847		2915.18	0.04835283		3445.17	0.03260688		3975.17	0.11963754
265.4	0.01819737		795.39	0.03366636		1325.39	0.08194175		1855.39	0.09400597		2385.38	0.0208919		2915.38	0.04892743		3445.37	0.03285114		3975.37	0.11928758
265.6	0.0180352		795.59	0.03318076		1325.59	0.08246017		1855.59	0.09444116		2385.58	0.02039441		2915.58	0.04956873		3445.57	0.03271743		3975.57	0.11969222
265.8	0.01882736		795.79	0.03411308		1325.79	0.08269461		1855.79	0.09356714		2385.78	0.01968033		2915.78	0.04977624		3445.77	0.03245326		3975.77	0.11986703
266	0.01947997		795.99	0.03399911		1325.99	0.08366631		1855.99	0.09340043		2385.98	0.01970445		2915.98	0.04985596		3445.97	0.0330823		3975.97	0.12026591
266.2	0.02027804		796.19	0.03434013		1326.19	0.08369182		1856.19	0.09287645		2386.18	0.01972941		2916.18	0.05013029		3446.17	0.03258504		3976.17	0.1202306
266.4	0.02013657		796.39	0.0346316		1326.39	0.08457851		1856.39	0.0929785		2386.38	0.01982689		2916.38	0.05073145		3446.37	0.03265528		3976.37	0.12058061
266.6	0.02033419		796.59	0.03445847		1326.59	0.08511451		1856.59	0.09286087		2386.58	0.01951009		2916.58	0.05122495		3446.57	0.03209209		3976.57	0.12041096
266.8	0.01994576		796.79	0.03422609		1326.79	0.08579169		1856.79	0.0934993		2386.78	0.02025589		2916.78	0.05122245		3446.77	0.03196894		3976.77	0.12113414
267	0.02088216		796.99	0.03386294		1326.99	0.08634234		1856.99	0.09414584		2386.98	0.0207576		2916.98	0.05001792		3446.97	0.03174437		3976.97	0.12137748
267.2	0.02111793		797.19	0.03277752		1327.19	0.08614024		1857.19	0.09366766		2387.18	0.02029543		2917.18	0.05098918		3447.17	0.03217629		3977.17	0.12165298
267.4	0.02093158		797.39	0.03273374		1327.39	0.08573583		1857.39	0.09434625		2387.38	0.02210971		2917.38	0.05146983		3447.37	0.03222003		3977.37	0.12110592
267.6	0.02147699		797.59	0.03308758		1327.59	0.08624783		1857.59	0.09466		2387.58	0.02331799		2917.58	0.05180385		3447.57	0.03281164		3977.57	0.12034427
267.8	0.02186387		797.79	0.03283754		1327.79	0.08704838		1857.79	0.09415908		2387.78	0.02365735		2917.78	0.0527735		3447.77	0.03328208		3977.77	0.12111198
268	0.02169074		797.99	0.03215166		1327.99	0.086189		1857.99	0.09407009		2387.98	0.02422539		2917.98	0.05241925		3447.97	0.03431685		3977.97	0.12153535
268.2	0.02240991		798.19	0.03270292		1328.19	0.08613226		1858.19	0.09362901		2388.18	0.02532536		2918.18	0.05165312		3448.17	0.0343295		3978.17	0.12155037
268.4	0.02255753		798.39	0.03196359		1328.39	0.0858574		1858.39	0.09435377		2388.38	0.0261794		2918.38	0.05146645		3448.37	0.03480419		3978.37	0.12246757
268.6	0.0226371		798.59	0.03138386		1328.59	0.08599659		1858.59	0.09442684		2388.58	0.02695395		2918.58	0.05148834		3448.57	0.03484744		3978.57	0.12296273
268.8	0.02253011		798.79	0.03099511		1328.79	0.08581659		1858.79	0.09461651		2388.78	0.02688967		2918.78	0.05097697		3448.77	0.03506065		3978.77	0.12299925
269	0.02257425		798.99	0.0312958		1328.99	0.08565346		1858.99	0.0953422		2388.98	0.02713314		2918.98	0.05107317		3448.97	0.03514088		3978.97	0.12241977
269.2	0.02255852		799.19	0.03124459		1329.19	0.08508513		1859.19	0.09541626		2389.18	0.0267027		2919.18	0.05106667		3449.17	0.03549309		3979.17	0.12189301
269.4	0.02206614		799.39	0.03163316		1329.39	0.08573242		1859.39	0.09606762		2389.38	0.02586463		2919.38	0.05072641		3449.37	0.03469655		3979.37	0.12205034
269.6	0.02136378		799.59	0.03179308		1329.59	0.08558562		1859.59	0.09566687		2389.58	0.02525109		2919.58	0.05052572		3449.57	0.03460882		3979.57	0.12186236
269.8	0.02147582		799.79	0.03250953		1329.79	0.08582585		1859.79	0.09516661		2389.78	0.02458691		2919.78	0.04997779		3449.77	0.03447283		3979.77	0.12151585
270	0.02144054		799.99	0.0320801		1329.99	0.08644226		1859.99	0.0949505		2389.98	0.02493813		2919.98	0.04926604		3449.97	0.03422043		3979.97	0.12149188
270.2	0.02163064		800.19	0.03231121		1330.19	0.08653184		1860.19	0.09438555		2390.18	0.02464147		2920.18	0.04956566		3450.17	0.03342376		3980.17	0.12159629
270.4	0.0213865		800.39	0.0322018		1330.39	0.08637972		1860.39	0.09476486		2390.38	0.02368117		2920.38	0.04927349		3450.37	0.03363343		3980.37	0.12272991
270.6	0.02126735		800.59	0.03195583		1330.59	0.08596059		1860.59	0.0954254		2390.58	0.02311286		2920.58	0.04996519		3450.57	0.03289323		3980.57	0.12354312
270.8	0.02090987		800.79	0.03171746		1330.79	0.08633698		1860.79	0.09527553		2390.78	0.02382757		2920.78	0.04941203		3450.77	0.03291535		3980.77	0.12359265
271	0.02151919		800.99	0.03267567		1330.99	0.08615539		1860.99	0.09553485		2390.98	0.02419922		2920.98	0.04927634		3450.97	0.03278014		3980.97	0.12368067
271.2	0.02103999		801.19	0.03220493		1331.19	0.0876178		1861.19	0.09484075		2391.18	0.02392839		2921.18	0.05067257		3451.17	0.03291614		3981.17	0.12356162
271.4	0.02050139		801.39	0.03196604		1331.39	0.08784802		1861.39	0.09531247		2391.38	0.02442868		2921.38	0.05064827		3451.37	0.03258912		3981.37	0.1236687
271.6	0.02056697		801.59	0.03207703		1331.59	0.08822292		1861.59	0.09555247		2391.58	0.02482633		2921.58	0.0510657		3451.57	0.03401921		3981.57	0.12455017
271.8	0.02199915		801.79	0.03305854		1331.79	0.08865877		1861.79	0.09592193		2391.78	0.02474784		2921.78	0.05207845		3451.77	0.03497907		3981.77	0.12518972
272	0.02174265		801.99	0.03340312		1331.99	0.08732896		1861.99	0.09615151		2391.98	0.02538669		2921.98	0.05169276		3451.97	0.03561967		3981.97	0.12456818
272.2	0.02222934		802.19	0.03445123		1332.19	0.08874008		1862.19	0.09644743		2392.18	0.02572881		2922.18	0.05198844		3452.17	0.03616033		3982.17	0.12506645
272.4	0.02144759		802.39	0.03493707		1332.39	0.08942239		1862.39	0.09753714		2392.38	0.0265302		2922.38	0.05264474		3452.37	0.03660134		3982.37	0.12498879
272.6	0.02092344		802.59	0.03449109		1332.59	0.08930008		1862.59	0.0976211		2392.58	0.02659187		2922.58	0.05264513		3452.57	0.03607082		3982.57	0.12463945
272.8	0.0196325		802.79	0.03498072		1332.79	0.08963571		1862.79	0.09797251		2392.78	0.02623335		2922.78	0.05275893		3452.77	0.03614921		3982.77	0.12466665
273	0.01911502		802.99	0.03545028		1332.99	0.08947906		1862.99	0.09854107		2392.98	0.0261876		2922.98	0.05395281		3452.97	0.03654193		3982.97	0.12541089
273.2	0.01997426		803.19	0.0352257		1333.19	0.08992029		1863.19	0.09891585		2393.18	0.02576279		2923.18	0.05422656		3453.17	0.03624206		3983.17	0.12525088
273.4	0.01959277		803.39	0.03439656		1333.39	0.09060987		1863.39	0.09862349		2393.38	0.02585997		2923.38	0.05412202		3453.37	0.03567242		3983.37	0.12550539
273.6	0.01931656		803.59	0.03422749		1333.59	0.09042454		1863.59	0.09850693		2393.58	0.02575061		2923.58	0.05503262		3453.57	0.0355493		3983.57	0.12528654
273.8	0.0196903		803.79	0.03374551		1333.79	0.09069594		1863.79	0.09825116		2393.78	0.02562762		2923.78	0.05541392		3453.77	0.03536243		3983.77	0.12550057
274	0.01996607		803.99	0.03264567		1333.99	0.09193882		1863.99	0.0985013		2393.98	0.0260998		2923.98	0.05653331		3453.97	0.03467398		3983.97	0.12649155
274.2	0.0204011		804.19	0.03181529		1334.19	0.09170472		1864.19	0.09923937		2394.18	0.02544081		2924.18	0.05806924		3454.17	0.0353339		3984.17	0.12692678
274.4	0.02043489		804.39	0.03114228		1334.39	0.09169499		1864.39	0.0993915		2394.38	0.02490154		2924.38	0.05899685		3454.37	0.03552511		3984.37	0.12830012
274.6	0.02031865		804.59	0.03052736		1334.59	0.09174594		1864.59	0.0995606		2394.58	0.02549589		2924.58	0.06058802		3454.57	0.03537772		3984.57	0.12846035
274.8	0.02058466		804.79	0.03041749		1334.79	0.09351463		1864.79	0.09848893		2394.78	0.02593827		2924.78	0.06018594		3454.77	0.03599294		3984.77	0.12757183
275	0.02092853		804.99	0.03078558		1334.99	0.09442496		1864.99	0.09922919		2394.98	0.02598374		2924.98	0.05972722		3454.97	0.03553991		3984.97	0.12840907
275.2	0.02071964		805.19	0.02978697		1335.19	0.09531832		1865.19	0.09904581		2395.18	0.02649521		2925.18	0.05939242		3455.17	0.03566905		3985.17	0.12851941
275.4	0.02060038		805.39	0.02977537		1335.39	0.09531115		1865.39	0.09953188		2395.38	0.02670166		2925.38	0.0587223		3455.37	0.0363842		3985.37	0.12832858
275.6	0.02075532		805.59	0.03021714		1335.59	0.09583		1865.59	0.10057259		2395.58	0.02766779		2925.58	0.05844832		3455.57	0.0375323		3985.57	0.12861932
275.8	0.02198286		805.79	0.03026593		1335.79	0.09586		1865.79	0.10107413		2395.78	0.02772831		2925.78	0.05757891		3455.77	0.0375168		3985.77	0.12779658
276	0.02145873		805.99	0.03021302		1335.99	0.09551564		1865.99	0.10108134		2395.98	0.02804904		2925.98	0.05647334		3455.97	0.03784139		3985.97	0.12788174
276.2	0.02182867		806.19	0.03066274		1336.19	0.0967973		1866.19	0.10156266		2396.18	0.02898693		2926.18	0.05550507		3456.17	0.03803135		3986.17	0.12760699
276.4	0.021403		806.39	0.03099202		1336.39	0.0969906		1866.39	0.10204807		2396.38	0.02941867		2926.38	0.05437374		3456.37	0.0376428		3986.37	0.12713001
276.6	0.02210625		806.59	0.03034944		1336.59	0.09615102		1866.59	0.10165302		2396.58	0.02881339		2926.58	0.05344508		3456.57	0.03660398		3986.57	0.12825121
276.8	0.02243326		806.79	0.03108027		1336.79	0.09627491		1866.79	0.10193877		2396.78	0.02830766		2926.78	0.05315486		3456.77	0.03634521		3986.77	0.12753412
277	0.02447363		806.99	0.03078845		1336.99	0.09562027		1866.99	0.10183615		2396.98	0.02880453		2926.98	0.05294972		3456.97	0.03598507		3986.97	0.12721294
277.2	0.02478945		807.19	0.02983481		1337.19	0.09465075		1867.19	0.10081684		2397.18	0.02831814		2927.18	0.05323551		3457.17	0.03598021		3987.17	0.12709632
277.4	0.02434568		807.39	0.0296299		1337.39	0.09363393		1867.39	0.10052842		2397.38	0.02832404		2927.38	0.05350617		3457.37	0.03564984		3987.37	0.12712556
277.6	0.02482958		807.59	0.02990491		1337.59	0.09238446		1867.59	0.1016198		2397.58	0.02805435		2927.58	0.05507693		3457.57	0.03674295		3987.57	0.12726851
277.8	0.02541608		807.79	0.030585		1337.79	0.09220143		1867.79	0.10100489		2397.78	0.02814902		2927.78	0.05560058		3457.77	0.03701426		3987.77	0.12735531
278	0.02535043		807.99	0.03121885		1337.99	0.0920387		1867.99	0.10111341		2397.98	0.02727056		2927.98	0.05677345		3457.97	0.03766349		3987.97	0.12870712
278.2	0.02532335		808.19	0.03060243		1338.19	0.0912011		1868.19	0.10104045		2398.18	0.02640839		2928.18	0.05784168		3458.17	0.03793254		3988.17	0.12872225
278.4	0.02538592		808.39	0.0307014		1338.39	0.09110253		1868.39	0.10056372		2398.38	0.02549104		2928.38	0.05845727		3458.37	0.03768696		3988.37	0.12898893
278.6	0.02561518		808.59	0.03057495		1338.59	0.09017572		1868.59	0.10145669		2398.58	0.02543116		2928.58	0.05956587		3458.57	0.03764809		3988.57	0.12866493
278.8	0.02501868		808.79	0.03123348		1338.79	0.09018343		1868.79	0.10085068		2398.78	0.02589125		2928.78	0.05933684		3458.77	0.03738365		3988.77	0.12903277
279	0.02537219		808.99	0.03134637		1338.99	0.09038217		1868.99	0.10096678		2398.98	0.02654888		2928.98	0.05939861		3458.97	0.03675746		3988.97	0.12997979
279.2	0.02561151		809.19	0.03150708		1339.19	0.0900028		1869.19	0.1013094		2399.18	0.02748873		2929.18	0.05971266		3459.17	0.03726593		3989.17	0.12971604
279.4	0.02484674		809.39	0.03176683		1339.39	0.09031082		1869.39	0.10159045		2399.38	0.02742522		2929.38	0.06060677		3459.37	0.03722501		3989.37	0.13039046
279.6	0.02429072		809.59	0.03137959		1339.59	0.09128346		1869.59	0.10256537		2399.58	0.02829459		2929.58	0.06063351		3459.57	0.03715087		3989.57	0.13097327
279.8	0.02494109		809.79	0.03228306		1339.79	0.09170257		1869.79	0.10265732		2399.78	0.02866931		2929.78	0.06084549		3459.77	0.03693085		3989.77	0.13093386
280	0.02465928		809.99	0.03316536		1339.99	0.09233382		1869.99	0.10345393		2399.98	0.02874083		2929.98	0.06119576		3459.97	0.03700871		3989.97	0.13180362
280.2	0.02496276		810.19	0.03347909		1340.19	0.09378936		1870.19	0.10447426		2400.18	0.0294691		2930.18	0.06099799		3460.17	0.03671919		3990.17	0.13082215
280.4	0.02483449		810.39	0.03268909		1340.39	0.09424488		1870.39	0.10538495		2400.38	0.02884086		2930.38	0.06130399		3460.37	0.03619258		3990.37	0.13133333
280.6	0.024958		810.59	0.03276789		1340.59	0.09444584		1870.59	0.10559683		2400.58	0.02830686		2930.58	0.06172363		3460.57	0.03588621		3990.57	0.13167651
280.8	0.02563203		810.79	0.0332044		1340.79	0.0947763		1870.79	0.10608334		2400.78	0.0272524		2930.78	0.06157602		3460.77	0.03602385		3990.77	0.13156718
281	0.02628097		810.99	0.0330861		1340.99	0.09478397		1870.99	0.10602354		2400.98	0.02760634		2930.98	0.06247513		3460.97	0.03670525		3990.97	0.13198851
281.2	0.02549349		811.19	0.03340043		1341.19	0.0940235		1871.19	0.10591315		2401.18	0.02726756		2931.18	0.06280088		3461.17	0.03728959		3991.17	0.13253833
281.4	0.0266603		811.39	0.03372998		1341.39	0.09371578		1871.39	0.1066882		2401.38	0.0275341		2931.38	0.06294435		3461.37	0.03783598		3991.37	0.1322923
281.6	0.02715684		811.59	0.03358441		1341.59	0.09431789		1871.59	0.10701372		2401.58	0.02662797		2931.58	0.06253128		3461.57	0.03850227		3991.57	0.13320875
281.8	0.02720899		811.79	0.03388643		1341.79	0.09521308		1871.79	0.10627969		2401.78	0.02666932		2931.78	0.06168465		3461.77	0.03854923		3991.77	0.13412079
282	0.02710319		811.99	0.03411484		1341.99	0.09510713		1871.99	0.10626966		2401.98	0.02613454		2931.98	0.06195074		3461.97	0.03843756		3991.97	0.13508832
282.2	0.02666998		812.19	0.03232788		1342.19	0.09521449		1872.19	0.10679188		2402.18	0.0260571		2932.18	0.06229582		3462.17	0.03820683		3992.17	0.1347349
282.4	0.02756872		812.39	0.03270919		1342.39	0.09544303		1872.39	0.1066459		2402.38	0.02639667		2932.38	0.06165528		3462.37	0.03769006		3992.37	0.13489341
282.6	0.02693201		812.59	0.03308838		1342.59	0.09497142		1872.59	0.10648689		2402.58	0.0266031		2932.58	0.06150283		3462.57	0.03714499		3992.57	0.13523229
282.8	0.02659804		812.79	0.0335192		1342.79	0.09461538		1872.79	0.1062069		2402.78	0.02766702		2932.78	0.06110581		3462.77	0.03629104		3992.77	0.1358003
283	0.02685946		812.99	0.0338908		1342.99	0.09507361		1872.99	0.10536284		2402.98	0.02864726		2932.98	0.06113879		3462.97	0.03681451		3992.97	0.13583607
283.2	0.0263603		813.19	0.03420316		1343.19	0.09512048		1873.19	0.10521317		2403.18	0.03025113		2933.18	0.0612342		3463.17	0.03664993		3993.17	0.13600743
283.4	0.02549631		813.39	0.03424991		1343.39	0.09445685		1873.39	0.10503472		2403.38	0.03080762		2933.38	0.0608558		3463.37	0.03614102		3993.37	0.13674404
283.6	0.0257837		813.59	0.03415895		1343.59	0.09431582		1873.59	0.10502427		2403.58	0.0316762		2933.58	0.06093698		3463.57	0.03631096		3993.57	0.13641709
283.8	0.02590558		813.79	0.03465745		1343.79	0.09400494		1873.79	0.10438102		2403.78	0.03236815		2933.78	0.06226378		3463.77	0.03508559		3993.77	0.13630739
284	0.02547107		813.99	0.03400852		1343.99	0.09384588		1873.99	0.10580867		2403.98	0.03345436		2933.98	0.06161861		3463.97	0.03472189		3993.97	0.13609433
284.2	0.02535024		814.19	0.0328174		1344.19	0.09501439		1874.19	0.10705248		2404.18	0.03396705		2934.18	0.06198675		3464.17	0.03481035		3994.17	0.13507776
284.4	0.02436923		814.39	0.03227412		1344.39	0.09491229		1874.39	0.10790854		2404.38	0.03379989		2934.38	0.06205495		3464.37	0.03497338		3994.37	0.13619208
284.6	0.02496131		814.59	0.03186193		1344.59	0.09521637		1874.59	0.1077482		2404.58	0.03367932		2934.58	0.06243124		3464.57	0.03537094		3994.57	0.13531338
284.8	0.02553176		814.79	0.03111471		1344.79	0.0953901		1874.79	0.10795724		2404.78	0.03333706		2934.78	0.06294681		3464.77	0.03606178		3994.77	0.135077
285	0.02538473		814.99	0.02988156		1344.99	0.09589646		1874.99	0.1084032		2404.98	0.03336715		2934.98	0.06385077		3464.97	0.03583536		3994.97	0.13422635
285.2	0.02487919		815.19	0.03008609		1345.19	0.09496413		1875.19	0.10877667		2405.18	0.03300154		2935.18	0.06420679		3465.17	0.03585738		3995.17	0.13395933
285.4	0.02600923		815.39	0.02889578		1345.39	0.09517861		1875.39	0.10908501		2405.38	0.03337317		2935.38	0.06441227		3465.37	0.0366619		3995.37	0.13272526
285.6	0.02546253		815.59	0.02829959		1345.59	0.09627335		1875.59	0.10883742		2405.58	0.0327023		2935.58	0.0642941		3465.57	0.03633617		3995.57	0.13309515
285.8	0.02495262		815.79	0.02765432		1345.79	0.09598826		1875.79	0.10909609		2405.78	0.03339789		2935.78	0.06481436		3465.77	0.0371297		3995.77	0.13256182
286	0.02493855		815.99	0.02739685		1345.99	0.09636453		1875.99	0.10961868		2405.98	0.03230747		2935.98	0.06577153		3465.97	0.03725251		3995.97	0.13304412
286.2	0.02480111		816.19	0.02738208		1346.19	0.09701789		1876.19	0.1097271		2406.18	0.03130677		2936.18	0.06544905		3466.17	0.03686125		3996.17	0.13340925
286.4	0.02572158		816.39	0.02896794		1346.39	0.09799512		1876.39	0.1093019		2406.38	0.03102183		2936.38	0.06454573		3466.37	0.03693291		3996.37	0.13390212
286.6	0.02564096		816.59	0.0294314		1346.59	0.09798976		1876.59	0.10907478		2406.58	0.03059876		2936.58	0.064697		3466.57	0.03715048		3996.57	0.13461357
286.8	0.02606422		816.79	0.030106		1346.79	0.09824513		1876.79	0.10928616		2406.78	0.03214021		2936.78	0.06494106		3466.77	0.0372415		3996.77	0.13523914
287	0.02561702		816.99	0.03132673		1346.99	0.09857903		1876.99	0.10827251		2406.98	0.03281		2936.98	0.06419258		3466.97	0.03835851		3996.97	0.13490586
287.2	0.02596933		817.19	0.03101846		1347.19	0.0989457		1877.19	0.10779331		2407.18	0.03343692		2937.18	0.0632827		3467.17	0.03773879		3997.17	0.13540273
287.4	0.02648353		817.39	0.03187838		1347.39	0.09888715		1877.39	0.10859532		2407.38	0.03293072		2937.38	0.062406		3467.37	0.0384388		3997.37	0.13570144
287.6	0.02731425		817.59	0.03140883		1347.59	0.09869315		1877.59	0.10874373		2407.58	0.03372576		2937.58	0.0631343		3467.57	0.03871229		3997.57	0.13669005
287.8	0.02701425		817.79	0.03163784		1347.79	0.09924436		1877.79	0.10934861		2407.78	0.03345259		2937.78	0.0634194		3467.77	0.03835645		3997.77	0.13706831
288	0.02722563		817.99	0.03107662		1347.99	0.10001925		1877.99	0.11125957		2407.98	0.03399539		2937.98	0.06246195		3467.97	0.0387983		3997.97	0.13744097
288.2	0.026707		818.19	0.03100056		1348.19	0.10127693		1878.19	0.11184597		2408.18	0.03401967		2938.18	0.06254946		3468.17	0.039632		3998.17	0.1381998
288.4	0.02652829		818.39	0.03145907		1348.39	0.10043193		1878.39	0.11179195		2408.38	0.03384886		2938.38	0.06282166		3468.37	0.0401581		3998.37	0.1389568
288.6	0.02793551		818.59	0.03062098		1348.59	0.1008515		1878.59	0.11223292		2408.58	0.03468409		2938.58	0.06355346		3468.57	0.04107173		3998.57	0.13772477
288.8	0.02741433		818.79	0.03046915		1348.79	0.10067206		1878.79	0.11304077		2408.78	0.03471843		2938.78	0.06431949		3468.77	0.0420902		3998.77	0.13807154
289	0.02760341		818.99	0.02894555		1348.99	0.10069408		1878.99	0.11335533		2408.98	0.03478483		2938.98	0.06493564		3468.97	0.04223485		3998.97	0.1380862
289.2	0.02760562		819.19	0.02923276		1349.19	0.099818		1879.19	0.11462829		2409.18	0.03514226		2939.18	0.06475946		3469.17	0.04267712		3999.17	0.13740096
289.4	0.02848978		819.39	0.02786896		1349.39	0.09973574		1879.39	0.11437058		2409.38	0.03657187		2939.38	0.06501902		3469.37	0.04289102		3999.37	0.13658617
289.6	0.02774443		819.59	0.02810145		1349.59	0.10012464		1879.59	0.11438628		2409.58	0.03646544		2939.58	0.06589101		3469.57	0.04317153		3999.57	0.13754402
289.8	0.027519		819.79	0.02768392		1349.79	0.10014083		1879.79	0.11520284		2409.78	0.03685885		2939.78	0.06533933		3469.77	0.04299711		3999.77	0.13847823
290	0.02682383		819.99	0.02780531		1349.99	0.1010325		1879.99	0.11470046		2409.98	0.03634618		2939.98	0.06558034		3469.97	0.04221365		3999.97	0.13916588
290.2	0.02664695		820.19	0.02821585		1350.19	0.10120961		1880.19	0.11429853		2410.18	0.03630456		2940.18	0.06447858		3470.17	0.0413323		4000.17	0.13990436
290.4	0.02647461		820.39	0.02874312		1350.39	0.101722		1880.39	0.11401052		2410.38	0.03693093		2940.38	0.06420966		3470.37	0.04130514		4000.37	0.14080471
290.6	0.02552985		820.59	0.02879892		1350.59	0.10177685		1880.59	0.11367434		2410.58	0.03723485		2940.58	0.06422481		3470.57	0.0405105		4000.57	0.14200533
290.8	0.02535331		820.79	0.02877121		1350.79	0.10240619		1880.79	0.11374911		2410.78	0.03810711		2940.78	0.06506462		3470.77	0.04010479		4000.77	0.14235101
291	0.02447837		820.99	0.02886894		1350.99	0.10298678		1880.99	0.11285489		2410.98	0.03746924		2940.98	0.06485119		3470.97	0.039372		4000.97	0.14217943
291.2	0.02421209		821.19	0.02883481		1351.19	0.10332222		1881.19	0.11281506		2411.18	0.03646825		2941.18	0.06496356		3471.17	0.03895932		4001.17	0.14311358
291.4	0.02431461		821.39	0.02924593		1351.39	0.10329553		1881.39	0.112877		2411.38	0.03519833		2941.38	0.06546721		3471.37	0.03845573		4001.37	0.14287677
291.6	0.02532255		821.59	0.0278541		1351.59	0.10248777		1881.59	0.11196069		2411.58	0.03519237		2941.58	0.06617783		3471.57	0.03771087		4001.57	0.14361805
291.8	0.02495747		821.79	0.02855044		1351.79	0.10327183		1881.79	0.11190356		2411.78	0.03437002		2941.78	0.06703742		3471.77	0.03737784		4001.77	0.14315735
292	0.0251632		821.99	0.0290642		1351.99	0.10366267		1881.99	0.11279302		2411.98	0.03546892		2941.98	0.06798313		3471.97	0.03682351		4001.97	0.14306733
292.2	0.02576621		822.19	0.02995651		1352.19	0.10401266		1882.19	0.11358141		2412.18	0.03552356		2942.18	0.0682373		3472.17	0.03714836		4002.17	0.14278084
292.4	0.02652023		822.39	0.02954681		1352.39	0.10348703		1882.39	0.11423857		2412.38	0.03592321		2942.38	0.06948379		3472.37	0.03791341		4002.37	0.14233314
292.6	0.02807989		822.59	0.0288626		1352.59	0.10376476		1882.59	0.1145741		2412.58	0.03681214		2942.58	0.06979043		3472.57	0.03903243		4002.57	0.14166863
292.8	0.02906617		822.79	0.02862241		1352.79	0.10375414		1882.79	0.11459599		2412.78	0.03716786		2942.78	0.07007778		3472.77	0.04030983		4002.77	0.14151345
293	0.02979379		822.99	0.02799182		1352.99	0.10378162		1882.99	0.11426688		2412.98	0.03761828		2942.98	0.0705168		3472.97	0.04139698		4002.97	0.14137066
293.2	0.03029638		823.19	0.02827744		1353.19	0.10298189		1883.19	0.11536701		2413.18	0.03823117		2943.18	0.07076419		3473.17	0.04113077		4003.17	0.14095747
293.4	0.03049722		823.39	0.02825091		1353.39	0.10303789		1883.39	0.11460471		2413.38	0.03897707		2943.38	0.07141772		3473.37	0.04161115		4003.37	0.14103269
293.6	0.03051312		823.59	0.02828729		1353.59	0.10337806		1883.59	0.11525587		2413.58	0.03972057		2943.58	0.07074261		3473.57	0.0422524		4003.57	0.1414795
293.8	0.03032691		823.79	0.02798369		1353.79	0.10293651		1883.79	0.11489187		2413.78	0.04014572		2943.78	0.06983563		3473.77	0.04275906		4003.77	0.14165268
294	0.03032191		823.99	0.02800128		1353.99	0.10284017		1883.99	0.11486072		2413.98	0.03960674		2943.98	0.07010838		3473.97	0.04347347		4003.97	0.14135651
294.2	0.02998837		824.19	0.02801194		1354.19	0.10265496		1884.19	0.1147885		2414.18	0.0398822		2944.18	0.07024229		3474.17	0.04415853		4004.17	0.14268656
294.4	0.02993614		824.39	0.02917144		1354.39	0.10254347		1884.39	0.11487669		2414.38	0.04050679		2944.38	0.07033001		3474.37	0.04480696		4004.37	0.14396674
294.6	0.02945791		824.59	0.02973276		1354.59	0.10345352		1884.59	0.1154862		2414.58	0.03984883		2944.58	0.0709976		3474.57	0.04462951		4004.57	0.14485862
294.8	0.02985936		824.79	0.02897849		1354.79	0.10246366		1884.79	0.11554885		2414.78	0.03888018		2944.78	0.0715937		3474.77	0.04482362		4004.77	0.14535162
295	0.02950039		824.99	0.02952024		1354.99	0.10185621		1884.99	0.11567824		2414.98	0.03726291		2944.98	0.07175428		3474.97	0.0442947		4004.97	0.14536181
295.2	0.02874405		825.19	0.03032825		1355.19	0.1014041		1885.19	0.11615958		2415.18	0.03629369		2945.18	0.07149946		3475.17	0.0443177		4005.17	0.1451696
295.4	0.02869594		825.39	0.03071057		1355.39	0.10135099		1885.39	0.11583044		2415.38	0.03625576		2945.38	0.0717467		3475.37	0.04312111		4005.37	0.14515908
295.6	0.02850893		825.59	0.03115348		1355.59	0.10084474		1885.59	0.11697264		2415.58	0.03648465		2945.58	0.07185923		3475.57	0.0432218		4005.57	0.14518191
295.8	0.02806464		825.79	0.03272432		1355.79	0.10166861		1885.79	0.11777846		2415.78	0.03620722		2945.78	0.07269547		3475.77	0.04275324		4005.77	0.1452157
296	0.02847366		825.99	0.03310515		1355.99	0.10150307		1885.99	0.11918883		2415.98	0.03747829		2945.98	0.07193671		3475.97	0.04200897		4005.97	0.14503553
296.2	0.02808197		826.19	0.0332693		1356.19	0.10162074		1886.19	0.11989593		2416.18	0.03745187		2946.18	0.07143985		3476.17	0.0421421		4006.17	0.14496544
296.4	0.02921202		826.39	0.03324707		1356.39	0.10186951		1886.39	0.11994822		2416.38	0.03814405		2946.38	0.07118026		3476.37	0.04221934		4006.37	0.14581098
296.6	0.0303948		826.59	0.03350511		1356.59	0.10212107		1886.59	0.11966846		2416.58	0.03800856		2946.58	0.07082591		3476.57	0.04215427		4006.57	0.1459351
296.8	0.03118585		826.79	0.03288522		1356.79	0.10253952		1886.79	0.11939885		2416.78	0.03848577		2946.78	0.0704436		3476.77	0.04222797		4006.77	0.14633168
297	0.03115555		826.99	0.0329595		1356.99	0.1029819		1886.99	0.11946898		2416.98	0.03903174		2946.98	0.07010697		3476.97	0.04238298		4006.97	0.14666379
297.2	0.031731		827.19	0.03248278		1357.19	0.1027004		1887.19	0.12028945		2417.18	0.0392021		2947.18	0.07020157		3477.17	0.04125247		4007.17	0.14667442
297.4	0.03204147		827.39	0.03231235		1357.39	0.10352547		1887.39	0.11901933		2417.38	0.03960333		2947.38	0.06982089		3477.37	0.04098896		4007.37	0.1473101
297.6	0.03289076		827.59	0.03143721		1357.59	0.10427821		1887.59	0.11904755		2417.58	0.03988058		2947.58	0.06850579		3477.57	0.0411727		4007.57	0.14771678
297.8	0.03238209		827.79	0.03122013		1357.79	0.10479529		1887.79	0.11845		2417.78	0.04021557		2947.78	0.06855794		3477.77	0.04169141		4007.77	0.148531
298	0.03293056		827.99	0.03047677		1357.99	0.10542709		1887.99	0.11787342		2417.98	0.04056089		2947.98	0.0693069		3477.97	0.04196376		4007.97	0.14907637
298.2	0.03171955		828.19	0.02997983		1358.19	0.10606953		1888.19	0.11776527		2418.18	0.04101929		2948.18	0.06970667		3478.17	0.04244989		4008.17	0.14984853
298.4	0.03224174		828.39	0.03016861		1358.39	0.106503		1888.39	0.11789711		2418.38	0.04077233		2948.38	0.06905088		3478.37	0.04242318		4008.37	0.15142116
298.6	0.03218061		828.59	0.02990384		1358.59	0.10711585		1888.59	0.11803206		2418.58	0.04030949		2948.58	0.06845269		3478.57	0.04215184		4008.57	0.15245151
298.8	0.03203128		828.79	0.02922759		1358.79	0.10633143		1888.79	0.11754806		2418.78	0.03939966		2948.78	0.06815613		3478.77	0.04239352		4008.77	0.15232828
299	0.03201535		828.99	0.02972211		1358.99	0.10731837		1888.99	0.11817841		2418.98	0.03968477		2948.98	0.06780749		3478.97	0.04198061		4008.97	0.15230746
299.2	0.03064739		829.19	0.02966031		1359.19	0.10666264		1889.19	0.11826323		2419.18	0.04021201		2949.18	0.06722882		3479.17	0.0417581		4009.17	0.15143908
299.4	0.03031373		829.39	0.02932632		1359.39	0.10564525		1889.39	0.11886184		2419.38	0.04012563		2949.38	0.06765048		3479.37	0.04215727		4009.37	0.15135514
299.6	0.02969528		829.59	0.02958353		1359.59	0.10521503		1889.59	0.11946418		2419.58	0.0398582		2949.58	0.06814257		3479.57	0.04296369		4009.57	0.15134888
299.8	0.02947452		829.79	0.0293775		1359.79	0.10565495		1889.79	0.11967174		2419.78	0.03999589		2949.78	0.06834924		3479.77	0.04210548		4009.77	0.15109285
300	0.02978384		829.99	0.02901015		1359.99	0.10520194		1889.99	0.12071696		2419.98	0.04142892		2949.98	0.06791697		3479.97	0.04216382		4009.97	0.15101814
300.2	0.0296657		830.19	0.02943023		1360.19	0.10531509		1890.19	0.12055989		2420.18	0.04162623		2950.18	0.06873646		3480.17	0.0423258		4010.17	0.15096089
300.4	0.03203851		830.39	0.03027154		1360.39	0.10552426		1890.39	0.1208433		2420.38	0.04260756		2950.38	0.0693482		3480.37	0.04304459		4010.37	0.15150399
300.6	0.0328412		830.59	0.03075435		1360.59	0.10546304		1890.59	0.12123543		2420.58	0.04287636		2950.58	0.06985556		3480.57	0.04329582		4010.57	0.15110336
300.8	0.03381944		830.79	0.0303983		1360.79	0.10507951		1890.79	0.12171621		2420.78	0.04404388		2950.78	0.07081297		3480.77	0.04332274		4010.77	0.15113876
301	0.03381498		830.99	0.03043936		1360.99	0.10533566		1890.99	0.12303258		2420.98	0.04379094		2950.98	0.07106189		3480.97	0.04383523		4010.97	0.15065576
301.2	0.03383789		831.19	0.03029945		1361.19	0.10474502		1891.19	0.12357369		2421.18	0.04267736		2951.18	0.07249524		3481.17	0.04323362		4011.17	0.15043758
301.4	0.03416996		831.39	0.03000464		1361.39	0.10468835		1891.39	0.12320259		2421.38	0.0421063		2951.38	0.0725438		3481.37	0.04338229		4011.37	0.15111564
301.6	0.03416712		831.59	0.02957843		1361.59	0.10453918		1891.59	0.12363865		2421.58	0.04172917		2951.58	0.07262869		3481.57	0.04354184		4011.57	0.15125605
301.8	0.03390345		831.79	0.02908651		1361.79	0.10430108		1891.79	0.12410457		2421.78	0.04283849		2951.78	0.07371588		3481.77	0.0434107		4011.77	0.15226964
302	0.03404543		831.99	0.02868465		1361.99	0.10440989		1891.99	0.12537015		2421.98	0.04307369		2951.98	0.07405636		3481.97	0.04322227		4011.97	0.15298732
302.2	0.03384391		832.19	0.02807967		1362.19	0.10464593		1892.19	0.12636074		2422.18	0.04237829		2952.18	0.07415707		3482.17	0.04281701		4012.17	0.15298405
302.4	0.03440233		832.39	0.02826994		1362.39	0.10496254		1892.39	0.12645642		2422.38	0.04304224		2952.38	0.07306405		3482.37	0.04265412		4012.37	0.15358905
302.6	0.03328222		832.59	0.02831984		1362.59	0.10525779		1892.59	0.12719995		2422.58	0.04354555		2952.58	0.07213045		3482.57	0.04283568		4012.57	0.15381657
302.8	0.03285091		832.79	0.0280016		1362.79	0.10528539		1892.79	0.12792369		2422.78	0.04265523		2952.78	0.07181414		3482.77	0.04368775		4012.77	0.15354735
303	0.03253721		832.99	0.02824485		1362.99	0.10534343		1892.99	0.12847655		2422.98	0.04252635		2952.98	0.07163764		3482.97	0.04368547		4012.97	0.15380819
303.2	0.03143506		833.19	0.02819555		1363.19	0.10436984		1893.19	0.12839453		2423.18	0.04176763		2953.18	0.07193387		3483.17	0.04396615		4013.17	0.1537491
303.4	0.03094995		833.39	0.02825432		1363.39	0.10579393		1893.39	0.12839136		2423.38	0.04133332		2953.38	0.07136538		3483.37	0.04386885		4013.37	0.15444124
303.6	0.03036942		833.59	0.02858003		1363.59	0.10636029		1893.59	0.12806901		2423.58	0.04088489		2953.58	0.07119852		3483.57	0.04406966		4013.57	0.15493149
303.8	0.03064933		833.79	0.02878903		1363.79	0.10736764		1893.79	0.12787378		2423.78	0.04137009		2953.78	0.07130853		3483.77	0.04300488		4013.77	0.15477895
304	0.03165796		833.99	0.0291094		1363.99	0.10776195		1893.99	0.12766791		2423.98	0.04255463		2953.98	0.07091121		3483.97	0.0427622		4013.97	0.15512837
304.2	0.03193203		834.19	0.03003826		1364.19	0.10851898		1894.19	0.12611142		2424.18	0.04278842		2954.18	0.07086463		3484.17	0.04209143		4014.17	0.15453752
304.4	0.03309629		834.39	0.03074741		1364.39	0.10955105		1894.39	0.12613728		2424.38	0.04412533		2954.38	0.07174806		3484.37	0.04349903		4014.37	0.15486853
304.6	0.0332291		834.59	0.03019592		1364.59	0.11066646		1894.59	0.1261286		2424.58	0.0436171		2954.58	0.07174484		3484.57	0.04405883		4014.57	0.15475683
304.8	0.03359369		834.79	0.02933225		1364.79	0.11085981		1894.79	0.1267096		2424.78	0.04440389		2954.78	0.07295117		3484.77	0.04442318		4014.77	0.15416719
305	0.03342743		834.99	0.02889388		1364.99	0.11152841		1894.99	0.12550377		2424.98	0.0436199		2954.98	0.07314321		3484.97	0.04543549		4014.97	0.15402178
305.2	0.03366802		835.19	0.02827485		1365.19	0.11159419		1895.19	0.12455633		2425.18	0.04367024		2955.18	0.07390968		3485.17	0.04501607		4015.17	0.15364349
305.4	0.03458187		835.39	0.02883032		1365.39	0.11161745		1895.39	0.12478035		2425.38	0.04407369		2955.38	0.07391088		3485.37	0.04559873		4015.37	0.15441851
305.6	0.03502577		835.59	0.02790067		1365.59	0.11183126		1895.59	0.12525553		2425.58	0.04454436		2955.58	0.07473351		3485.57	0.04535032		4015.57	0.1551821
305.8	0.03523215		835.79	0.02683393		1365.79	0.11216017		1895.79	0.1261461		2425.78	0.04545865		2955.78	0.07538494		3485.77	0.04532745		4015.77	0.15607267
306	0.03585759		835.99	0.0260977		1365.99	0.11232778		1895.99	0.12661428		2425.98	0.04635345		2955.98	0.07481059		3485.97	0.04511491		4015.97	0.15647115
306.2	0.03586481		836.19	0.02614963		1366.19	0.11263874		1896.19	0.12693581		2426.18	0.0471408		2956.18	0.07551446		3486.17	0.04509117		4016.17	0.15573393
306.4	0.03508		836.39	0.02657489		1366.39	0.1120483		1896.39	0.1272687		2426.38	0.0471817		2956.38	0.07484664		3486.37	0.04627811		4016.37	0.15584816
306.6	0.03459893		836.59	0.02716311		1366.59	0.11175728		1896.59	0.12773688		2426.58	0.04659413		2956.58	0.07491986		3486.57	0.04636244		4016.57	0.15636389
306.8	0.03457824		836.79	0.02723155		1366.79	0.11131801		1896.79	0.12792694		2426.78	0.04565406		2956.78	0.07437521		3486.77	0.04686369		4016.77	0.15681786
307	0.03380941		836.99	0.02727106		1366.99	0.11052823		1896.99	0.12787804		2426.98	0.04507165		2956.98	0.07510942		3486.97	0.04606433		4016.97	0.15751013
307.2	0.03289951		837.19	0.02754392		1367.19	0.11000179		1897.19	0.12779685		2427.18	0.04508257		2957.18	0.07584131		3487.17	0.04563194		4017.17	0.15835857
307.4	0.03281033		837.39	0.02772731		1367.39	0.11058904		1897.39	0.12733419		2427.38	0.04506577		2957.38	0.07595753		3487.37	0.04450838		4017.37	0.1591465
307.6	0.03331345		837.59	0.02877403		1367.59	0.1092932		1897.59	0.12701105		2427.58	0.04432947		2957.58	0.07647373		3487.57	0.04467762		4017.57	0.15918834
307.8	0.03377925		837.79	0.02927988		1367.79	0.10953125		1897.79	0.12598843		2427.78	0.04421069		2957.78	0.0765468		3487.77	0.04323069		4017.77	0.15899201
308	0.03437847		837.99	0.02939535		1367.99	0.10881463		1897.99	0.12607481		2427.98	0.04380739		2957.98	0.07583095		3487.97	0.04263382		4017.97	0.15930112
308.2	0.03405321		838.19	0.03019176		1368.19	0.10848184		1898.19	0.12508212		2428.18	0.0429993		2958.18	0.07639278		3488.17	0.04255348		4018.17	0.15896624
308.4	0.03475192		838.39	0.02976777		1368.39	0.10867309		1898.39	0.12463107		2428.38	0.04272727		2958.38	0.07763721		3488.37	0.04326011		4018.37	0.15957861
308.6	0.03570931		838.59	0.02968026		1368.59	0.10888893		1898.59	0.12419351		2428.58	0.04266256		2958.58	0.07796806		3488.57	0.04351288		4018.57	0.15931866
308.8	0.0358124		838.79	0.03004673		1368.79	0.10826403		1898.79	0.12384392		2428.78	0.04338157		2958.78	0.07897373		3488.77	0.04358299		4018.77	0.15947118
309	0.03567247		838.99	0.03020169		1368.99	0.1079884		1898.99	0.12228424		2428.98	0.04352977		2958.98	0.07930384		3488.97	0.04443762		4018.97	0.15980145
309.2	0.03626231		839.19	0.03080289		1369.19	0.10834379		1899.19	0.12280618		2429.18	0.04329984		2959.18	0.08026827		3489.17	0.04444718		4019.17	0.15965762
309.4	0.03701529		839.39	0.03122388		1369.39	0.10859484		1899.39	0.12374574		2429.38	0.04369364		2959.38	0.08053831		3489.37	0.04540432		4019.37	0.16022035
309.6	0.03738328		839.59	0.03012186		1369.59	0.10857409		1899.59	0.12414514		2429.58	0.04347379		2959.58	0.07999268		3489.57	0.04535314		4019.57	0.16058335
309.8	0.03745405		839.79	0.02992945		1369.79	0.10889253		1899.79	0.12480763		2429.78	0.04423127		2959.78	0.07981419		3489.77	0.04518775		4019.77	0.16004395
310	0.03824119		839.99	0.02975987		1369.99	0.10930966		1899.99	0.12567287		2429.98	0.04508259		2959.98	0.07845165		3489.97	0.04514277		4019.97	0.16021894
310.2	0.03775265		840.19	0.03003438		1370.19	0.11013672		1900.19	0.1260583		2430.18	0.04437625		2960.18	0.07790801		3490.17	0.04583675		4020.17	0.15966613
310.4	0.03787095		840.39	0.03017122		1370.39	0.10963447		1900.39	0.12662211		2430.38	0.04368094		2960.38	0.07661433		3490.37	0.04607303		4020.37	0.15949598
310.6	0.03803722		840.59	0.02999937		1370.59	0.10991949		1900.59	0.12748623		2430.58	0.04391869		2960.58	0.07587064		3490.57	0.04541498		4020.57	0.15949173
310.8	0.03718994		840.79	0.02923784		1370.79	0.10961646		1900.79	0.12851983		2430.78	0.04417895		2960.78	0.07523168		3490.77	0.044699		4020.77	0.16018076
311	0.03766826		840.99	0.02903831		1370.99	0.11006723		1900.99	0.13021997		2430.98	0.04418645		2960.98	0.07576529		3490.97	0.04442549		4020.97	0.1601829
311.2	0.03689423		841.19	0.02860926		1371.19	0.11090818		1901.19	0.13122492		2431.18	0.04472682		2961.18	0.07580829		3491.17	0.04473825		4021.17	0.1609651
311.4	0.03701867		841.39	0.02884468		1371.39	0.11174793		1901.39	0.13172398		2431.38	0.044438		2961.38	0.0752136		3491.37	0.04444862		4021.37	0.16168131
311.6	0.03745523		841.59	0.02939882		1371.59	0.11199692		1901.59	0.13263747		2431.58	0.04463094		2961.58	0.0741387		3491.57	0.0449815		4021.57	0.16181832
311.8	0.03815826		841.79	0.0292404		1371.79	0.11208261		1901.79	0.13202161		2431.78	0.04448876		2961.78	0.07364931		3491.77	0.04501342		4021.77	0.16186906
312	0.03846747		841.99	0.02826794		1371.99	0.11270056		1901.99	0.13266908		2431.98	0.04418138		2961.98	0.07303692		3491.97	0.04507601		4021.97	0.16185604
312.2	0.03841675		842.19	0.02812139		1372.19	0.11311583		1902.19	0.13249526		2432.18	0.04380305		2962.18	0.07348289		3492.17	0.04536036		4022.17	0.1607888
312.4	0.03881986		842.39	0.02829126		1372.39	0.11384483		1902.39	0.13131615		2432.38	0.04438914		2962.38	0.07444823		3492.37	0.04575584		4022.37	0.16073623
312.6	0.03951894		842.59	0.02746246		1372.59	0.11368235		1902.59	0.13142548		2432.58	0.04525261		2962.58	0.07512694		3492.57	0.04713223		4022.57	0.16050238
312.8	0.0390246		842.79	0.02757085		1372.79	0.11390454		1902.79	0.13111442		2432.78	0.04516231		2962.78	0.07627833		3492.77	0.04737903		4022.77	0.16099859
313	0.03990542		842.99	0.02808804		1372.99	0.11405044		1902.99	0.13054623		2432.98	0.04479456		2962.98	0.07656221		3492.97	0.04810337		4022.97	0.16100409
313.2	0.0399401		843.19	0.02815984		1373.19	0.11488836		1903.19	0.1303432		2433.18	0.04461362		2963.18	0.07731561		3493.17	0.04833251		4023.17	0.16108889
313.4	0.03991963		843.39	0.02739427		1373.39	0.11554191		1903.39	0.13053431		2433.38	0.04481362		2963.38	0.07681292		3493.37	0.04887408		4023.37	0.16082113
313.6	0.03957981		843.59	0.027679		1373.59	0.11593091		1903.59	0.13125218		2433.58	0.0438058		2963.58	0.07682492		3493.57	0.04865853		4023.57	0.16109133
313.8	0.0389981		843.79	0.0279096		1373.79	0.11587651		1903.79	0.13076789		2433.78	0.04419994		2963.78	0.07761251		3493.77	0.04861121		4023.77	0.16090261
314	0.03816656		843.99	0.02796837		1373.99	0.11614854		1903.99	0.12976253		2433.98	0.04402561		2963.98	0.07646925		3493.97	0.04832857		4023.97	0.16145701
314.2	0.03786991		844.19	0.02798722		1374.19	0.11720211		1904.19	0.12920643		2434.18	0.04401427		2964.18	0.0766611		3494.17	0.04754651		4024.17	0.16226917
314.4	0.03708451		844.39	0.0289101		1374.39	0.11731437		1904.39	0.12962882		2434.38	0.04446494		2964.38	0.07669508		3494.37	0.04705023		4024.37	0.16250581
314.6	0.03619257		844.59	0.02915751		1374.59	0.11768968		1904.59	0.13035591		2434.58	0.04450142		2964.58	0.07682699		3494.57	0.04573889		4024.57	0.1633045
314.8	0.03572592		844.79	0.02967276		1374.79	0.11708577		1904.79	0.13082243		2434.78	0.04532609		2964.78	0.07731756		3494.77	0.04532277		4024.77	0.1645505
315	0.03644589		844.99	0.02993944		1374.99	0.11755143		1904.99	0.13173058		2434.98	0.04514881		2964.98	0.07730596		3494.97	0.04572106		4024.97	0.16484338
315.2	0.03561392		845.19	0.02973681		1375.19	0.11786957		1905.19	0.13223624		2435.18	0.04599847		2965.18	0.07719092		3495.17	0.04597718		4025.17	0.16539116
315.4	0.03571617		845.39	0.03041562		1375.39	0.11790884		1905.39	0.13177408		2435.38	0.04608763		2965.38	0.07757721		3495.37	0.04519785		4025.37	0.1655385
315.6	0.0362013		845.59	0.03004122		1375.59	0.11753008		1905.59	0.13179477		2435.58	0.04671336		2965.58	0.07820943		3495.57	0.04526046		4025.57	0.16587358
315.8	0.03652478		845.79	0.02944345		1375.79	0.11684002		1905.79	0.13137548		2435.78	0.04662005		2965.78	0.07869285		3495.77	0.04600678		4025.77	0.16570655
316	0.03681636		845.99	0.02825013		1375.99	0.11763777		1905.99	0.13134527		2435.98	0.0470416		2965.98	0.07897673		3495.97	0.04622077		4025.97	0.16462634
316.2	0.03724228		846.19	0.02869027		1376.19	0.11742997		1906.19	0.1310466		2436.18	0.04761354		2966.18	0.07998035		3496.17	0.04723729		4026.17	0.1640941
316.4	0.03743747		846.39	0.02839466		1376.39	0.11665111		1906.39	0.1308303		2436.38	0.0477947		2966.38	0.08097115		3496.37	0.04796939		4026.37	0.16374249
316.6	0.03820786		846.59	0.0275373		1376.59	0.11551431		1906.59	0.13082346		2436.58	0.04728926		2966.58	0.08172326		3496.57	0.04822889		4026.57	0.16442827
316.8	0.03835432		846.79	0.02789974		1376.79	0.11574102		1906.79	0.13007082		2436.78	0.04659949		2966.78	0.08167253		3496.77	0.04774121		4026.77	0.16466769
317	0.03869949		846.99	0.02768839		1376.99	0.11511544		1906.99	0.12994832		2436.98	0.04610889		2966.98	0.08186088		3496.97	0.04908006		4026.97	0.16510197
317.2	0.03804345		847.19	0.02756279		1377.19	0.11537362		1907.19	0.1302729		2437.18	0.04700571		2967.18	0.08243174		3497.17	0.04975371		4027.17	0.16483745
317.4	0.03797411		847.39	0.02779313		1377.39	0.11570492		1907.39	0.1312268		2437.38	0.04626929		2967.38	0.0831042		3497.37	0.05039532		4027.37	0.1648747
317.6	0.03785394		847.59	0.02770531		1377.59	0.11506854		1907.59	0.13186028		2437.58	0.04650072		2967.58	0.08392498		3497.57	0.0502358		4027.57	0.16482105
317.8	0.03674056		847.79	0.02760399		1377.79	0.11485852		1907.79	0.13114433		2437.78	0.04739864		2967.78	0.08355986		3497.77	0.0500323		4027.77	0.16535356
318	0.03616821		847.99	0.02713519		1377.99	0.11535504		1907.99	0.13131973		2437.98	0.04767174		2967.98	0.08247793		3497.97	0.04969942		4027.97	0.16542723
318.2	0.03667343		848.19	0.02763259		1378.19	0.11650338		1908.19	0.1324373		2438.18	0.04858799		2968.18	0.08290401		3498.17	0.04940301		4028.17	0.16670965
318.4	0.03581529		848.39	0.02841376		1378.39	0.11661873		1908.39	0.1324965		2438.38	0.04816929		2968.38	0.08282504		3498.37	0.05001306		4028.37	0.16741749
318.6	0.03681141		848.59	0.02872696		1378.59	0.11697733		1908.59	0.13418148		2438.58	0.04779099		2968.58	0.08267302		3498.57	0.04917067		4028.57	0.16813935
318.8	0.03647768		848.79	0.02801239		1378.79	0.11677524		1908.79	0.13460464		2438.78	0.04745686		2968.78	0.08243803		3498.77	0.04927253		4028.77	0.16896045
319	0.03710219		848.99	0.02837162		1378.99	0.11803667		1908.99	0.13533552		2438.98	0.04723101		2968.98	0.08204869		3498.97	0.04905766		4028.97	0.16849998
319.2	0.0369559		849.19	0.02787725		1379.19	0.11910073		1909.19	0.13625662		2439.18	0.04822596		2969.18	0.08178059		3499.17	0.04924265		4029.17	0.16862841
319.4	0.03724061		849.39	0.02795345		1379.39	0.11909876		1909.39	0.13572316		2439.38	0.04793978		2969.38	0.08237541		3499.37	0.0481365		4029.37	0.16969619
319.6	0.03826924		849.59	0.02788884		1379.59	0.11922097		1909.59	0.13650284		2439.58	0.04836124		2969.58	0.08250365		3499.57	0.04813381		4029.57	0.17017335
319.8	0.03846502		849.79	0.02793875		1379.79	0.11930356		1909.79	0.13609418		2439.78	0.04817122		2969.78	0.08206408		3499.77	0.04929451		4029.77	0.17030153
320	0.03921712		849.99	0.02769642		1379.99	0.11985638		1909.99	0.13554373		2439.98	0.04881754		2969.98	0.08165228		3499.97	0.04971178		4029.97	0.16983306
320.2	0.03975902		850.19	0.02722388		1380.19	0.11986953		1910.19	0.13556093		2440.18	0.04921335		2970.18	0.08142915		3500.17	0.04989602		4030.17	0.1699674
320.4	0.03947847		850.39	0.02696027		1380.39	0.11960474		1910.39	0.13483354		2440.38	0.0485922		2970.38	0.08227749		3500.37	0.04983985		4030.37	0.17005861
320.6	0.0397444		850.59	0.02678028		1380.59	0.11962658		1910.59	0.13384842		2440.58	0.04903467		2970.58	0.08244585		3500.57	0.04932532		4030.57	0.17132393
320.8	0.0399164		850.79	0.02653		1380.79	0.11958631		1910.79	0.13358794		2440.78	0.04980854		2970.78	0.0820495		3500.77	0.04981097		4030.77	0.17099477
321	0.03991435		850.99	0.02633598		1380.99	0.11976929		1910.99	0.1339504		2440.98	0.05082415		2970.98	0.08307577		3500.97	0.05122183		4030.97	0.1708148
321.2	0.03942626		851.19	0.02695429		1381.19	0.12019155		1911.19	0.13436717		2441.18	0.05123377		2971.18	0.08365941		3501.17	0.05105316		4031.17	0.17118084
321.4	0.03924429		851.39	0.02719022		1381.39	0.11978864		1911.39	0.13453264		2441.38	0.051408		2971.38	0.08413408		3501.37	0.05098719		4031.37	0.17091704
321.6	0.03980645		851.59	0.02763817		1381.59	0.11940499		1911.59	0.13456766		2441.58	0.05179636		2971.58	0.08428536		3501.57	0.05111217		4031.57	0.17070971
321.8	0.03890673		851.79	0.02760795		1381.79	0.11988319		1911.79	0.13472831		2441.78	0.05122164		2971.78	0.08327669		3501.77	0.05092663		4031.77	0.17113774
322	0.03909404		851.99	0.0279333		1381.99	0.11971497		1911.99	0.13545562		2441.98	0.05130046		2971.98	0.08266073		3501.97	0.05070035		4031.97	0.17071472
322.2	0.03889235		852.19	0.02941312		1382.19	0.12054543		1912.19	0.13651286		2442.18	0.05168106		2972.18	0.0833861		3502.17	0.05110692		4032.17	0.17183216
322.4	0.0387622		852.39	0.02935289		1382.39	0.12039664		1912.39	0.13715354		2442.38	0.05048795		2972.38	0.08317025		3502.37	0.05137077		4032.37	0.17212536
322.6	0.03969011		852.59	0.02985359		1382.59	0.1206773		1912.59	0.13923847		2442.58	0.05023884		2972.58	0.08211432		3502.57	0.0505705		4032.57	0.17192144
322.8	0.03935299		852.79	0.03013531		1382.79	0.12091664		1912.79	0.13918251		2442.78	0.05004778		2972.78	0.08169829		3502.77	0.05036095		4032.77	0.17251627
323	0.04043639		852.99	0.03158207		1382.99	0.12124199		1912.99	0.14026139		2442.98	0.05107879		2972.98	0.08107949		3502.97	0.05058629		4032.97	0.17232916
323.2	0.04118746		853.19	0.03161858		1383.19	0.12095704		1913.19	0.14025092		2443.18	0.05143536		2973.18	0.08136523		3503.17	0.05007927		4033.17	0.17221297
323.4	0.04222334		853.39	0.03251604		1383.39	0.12130962		1913.39	0.14033276		2443.38	0.05096111		2973.38	0.08157651		3503.37	0.04956418		4033.37	0.17212299
323.6	0.04337449		853.59	0.03210504		1383.59	0.12090398		1913.59	0.14001659		2443.58	0.05057007		2973.58	0.08129683		3503.57	0.05043531		4033.57	0.17197894
323.8	0.04285401		853.79	0.03130247		1383.79	0.1205739		1913.79	0.13887121		2443.78	0.05048359		2973.78	0.0814053		3503.77	0.05045363		4033.77	0.17257074
324	0.04277309		853.99	0.03004238		1383.99	0.12082331		1913.99	0.13921343		2443.98	0.05047533		2973.98	0.08214668		3503.97	0.05099852		4033.97	0.17250128
324.2	0.04303253		854.19	0.02934375		1384.19	0.12062278		1914.19	0.13876829		2444.18	0.05075454		2974.18	0.08297825		3504.17	0.05014602		4034.17	0.17202052
324.4	0.04242907		854.39	0.02865177		1384.39	0.12011608		1914.39	0.13754039		2444.38	0.05079271		2974.38	0.0838706		3504.37	0.05015931		4034.37	0.17297147
324.6	0.04251662		854.59	0.02806929		1384.59	0.11929703		1914.59	0.13741001		2444.58	0.05210009		2974.58	0.08400074		3504.57	0.04990965		4034.57	0.17302704
324.8	0.04200935		854.79	0.02696355		1384.79	0.11962933		1914.79	0.1366412		2444.78	0.05265491		2974.78	0.08515933		3504.77	0.04984927		4034.77	0.17272723
325	0.04139128		854.99	0.02655728		1384.99	0.12053168		1914.99	0.1362151		2444.98	0.05249451		2974.98	0.08657969		3504.97	0.0498123		4034.97	0.17265979
325.2	0.04092057		855.19	0.02618159		1385.19	0.12038594		1915.19	0.13640297		2445.18	0.05220162		2975.18	0.0873044		3505.17	0.04978737		4035.17	0.17413054
325.4	0.04060357		855.39	0.02597706		1385.39	0.119994		1915.39	0.13588903		2445.38	0.05244378		2975.38	0.08727534		3505.37	0.04966013		4035.37	0.17402978
325.6	0.03964963		855.59	0.02548465		1385.59	0.11978475		1915.59	0.1361422		2445.58	0.0514546		2975.58	0.08739567		3505.57	0.05018235		4035.57	0.17522733
325.8	0.0387502		855.79	0.02522037		1385.79	0.11966772		1915.79	0.1359037		2445.78	0.05149835		2975.78	0.08702503		3505.77	0.05043026		4035.77	0.17454153
326	0.03789297		855.99	0.02633026		1385.99	0.11930987		1915.99	0.13533855		2445.98	0.05208525		2975.98	0.08645501		3505.97	0.05081363		4035.97	0.17505128
326.2	0.0372884		856.19	0.02652041		1386.19	0.11998549		1916.19	0.1355882		2446.18	0.05299438		2976.18	0.08694418		3506.17	0.05118535		4036.17	0.17575198
326.4	0.03780173		856.39	0.02642793		1386.39	0.12024502		1916.39	0.13591804		2446.38	0.05319898		2976.38	0.08623351		3506.37	0.05114043		4036.37	0.17551646
326.6	0.03855404		856.59	0.027687		1386.59	0.12059061		1916.59	0.13660863		2446.58	0.05348569		2976.58	0.08565227		3506.57	0.05087382		4036.57	0.17605799
326.8	0.03926521		856.79	0.02797126		1386.79	0.11998896		1916.79	0.1371879		2446.78	0.05334818		2976.78	0.08558788		3506.77	0.05058175		4036.77	0.17644635
327	0.03967399		856.99	0.02859776		1386.99	0.12091634		1916.99	0.13831783		2446.98	0.05324076		2976.98	0.08559849		3506.97	0.05010355		4036.97	0.17641378
327.2	0.03926021		857.19	0.02831157		1387.19	0.12104904		1917.19	0.13902023		2447.18	0.05227955		2977.18	0.08616559		3507.17	0.05083327		4037.17	0.1764233
327.4	0.03929419		857.39	0.0285727		1387.39	0.12170611		1917.39	0.14042309		2447.38	0.05216137		2977.38	0.08610386		3507.37	0.05140651		4037.37	0.17707042
327.6	0.03981139		857.59	0.02859774		1387.59	0.12196233		1917.59	0.1403765		2447.58	0.05188057		2977.58	0.08622235		3507.57	0.0514592		4037.57	0.17772879
327.8	0.03942794		857.79	0.02920122		1387.79	0.12246408		1917.79	0.14150352		2447.78	0.05154001		2977.78	0.08660512		3507.77	0.05133425		4037.77	0.17861282
328	0.03960346		857.99	0.02968309		1387.99	0.12309587		1917.99	0.14235584		2447.98	0.0509471		2977.98	0.08736351		3507.97	0.05187437		4037.97	0.17836979
328.2	0.04065556		858.19	0.02963915		1388.19	0.12319305		1918.19	0.14219828		2448.18	0.05132441		2978.18	0.08810269		3508.17	0.05107591		4038.17	0.17817667
328.4	0.04129318		858.39	0.029526		1388.39	0.12347518		1918.39	0.14192815		2448.38	0.05124783		2978.38	0.08805029		3508.37	0.05086776		4038.37	0.17905864
328.6	0.04168313		858.59	0.03074667		1388.59	0.12429635		1918.59	0.1421077		2448.58	0.05189891		2978.58	0.08849424		3508.57	0.0505961		4038.57	0.1785555
328.8	0.04188922		858.79	0.03047046		1388.79	0.12526489		1918.79	0.14189183		2448.78	0.05226491		2978.78	0.09013675		3508.77	0.05096904		4038.77	0.17853308
329	0.04228521		858.99	0.03105259		1388.99	0.12514666		1918.99	0.14325097		2448.98	0.05206732		2978.98	0.09071391		3508.97	0.0508715		4038.97	0.17888339
329.2	0.04308421		859.19	0.0315063		1389.19	0.12484263		1919.19	0.14380502		2449.18	0.05250814		2979.18	0.09103452		3509.17	0.05140351		4039.17	0.17949556
329.4	0.04274108		859.39	0.03179141		1389.39	0.12464354		1919.39	0.14363805		2449.38	0.05261947		2979.38	0.09086772		3509.37	0.05136746		4039.37	0.17927074
329.6	0.04292934		859.59	0.03231446		1389.59	0.12412075		1919.59	0.14304031		2449.58	0.05329201		2979.58	0.0901846		3509.57	0.05313815		4039.57	0.17837874
329.8	0.04301611		859.79	0.0332286		1389.79	0.12479569		1919.79	0.14213127		2449.78	0.05379045		2979.78	0.08931521		3509.77	0.05349554		4039.77	0.17681913
330	0.0428201		859.99	0.03379397		1389.99	0.12489529		1919.99	0.14212382		2449.98	0.05439158		2979.98	0.08871732		3509.97	0.05357876		4039.97	0.17666651
330.2	0.04341323		860.19	0.03384207		1390.19	0.12531722		1920.19	0.14252977		2450.18	0.05537324		2980.18	0.08883441		3510.17	0.05397105		4040.17	0.17658345
330.4	0.04315404		860.39	0.03447276		1390.39	0.12507359		1920.39	0.14179568		2450.38	0.05536546		2980.38	0.08887824		3510.37	0.0547999		4040.37	0.17596563
330.6	0.04374601		860.59	0.03489753		1390.59	0.12420026		1920.59	0.142204		2450.58	0.05537458		2980.58	0.08837759		3510.57	0.05528028		4040.57	0.17649564
330.8	0.0434408		860.79	0.03469146		1390.79	0.12400534		1920.79	0.14228323		2450.78	0.0551163		2980.78	0.08839301		3510.77	0.05506706		4040.77	0.17602536
331	0.04299814		860.99	0.03451202		1390.99	0.1252309		1920.99	0.1423681		2450.98	0.05478468		2980.98	0.08867		3510.97	0.05560135		4040.97	0.17591427
331.2	0.04326205		861.19	0.03336207		1391.19	0.12487566		1921.19	0.14297429		2451.18	0.05483576		2981.18	0.08822351		3511.17	0.05659497		4041.17	0.17654714
331.4	0.04396798		861.39	0.03297349		1391.39	0.12476557		1921.39	0.14280506		2451.38	0.05548239		2981.38	0.08852344		3511.37	0.05588866		4041.37	0.17651779
331.6	0.04393078		861.59	0.03293316		1391.59	0.12570935		1921.59	0.14159437		2451.58	0.05523168		2981.58	0.0887651		3511.57	0.0554357		4041.57	0.17665517
331.8	0.04419864		861.79	0.03326028		1391.79	0.12576949		1921.79	0.14175669		2451.78	0.05428184		2981.78	0.0891177		3511.77	0.0558888		4041.77	0.17733651
332	0.04455652		861.99	0.03278359		1391.99	0.12668165		1921.99	0.1409863		2451.98	0.05417995		2981.98	0.08965819		3511.97	0.05584704		4041.97	0.17744268
332.2	0.04498496		862.19	0.03215424		1392.19	0.12728271		1922.19	0.14045008		2452.18	0.05422804		2982.18	0.09014163		3512.17	0.05554632		4042.17	0.1778
332.4	0.0452296		862.39	0.03245127		1392.39	0.12730586		1922.39	0.14023304		2452.38	0.05361765		2982.38	0.08991184		3512.37	0.05524754		4042.37	0.17863461
332.6	0.04517418		862.59	0.03330093		1392.59	0.12720139		1922.59	0.14001129		2452.58	0.05368379		2982.58	0.09028067		3512.57	0.05504827		4042.57	0.17838162
332.8	0.04611113		862.79	0.03284928		1392.79	0.1277372		1922.79	0.14049166		2452.78	0.0536328		2982.78	0.09105837		3512.77	0.05433042		4042.77	0.17905278
333	0.04592117		862.99	0.0330889		1392.99	0.12792897		1922.99	0.14109047		2452.98	0.05294045		2982.98	0.09159422		3512.97	0.05262897		4042.97	0.17905913
333.2	0.04671451		863.19	0.03332143		1393.19	0.12850657		1923.19	0.14061758		2453.18	0.05217378		2983.18	0.09162139		3513.17	0.05196747		4043.17	0.17883025
333.4	0.04578646		863.39	0.03300389		1393.39	0.1284861		1923.39	0.14102255		2453.38	0.05230167		2983.38	0.09033074		3513.37	0.05254908		4043.37	0.17844742
333.6	0.04550554		863.59	0.03408842		1393.59	0.1282031		1923.59	0.14124188		2453.58	0.05223263		2983.58	0.08954535		3513.57	0.05325012		4043.57	0.1778373
333.8	0.04496364		863.79	0.03517026		1393.79	0.12899335		1923.79	0.14254864		2453.78	0.05158121		2983.78	0.08975357		3513.77	0.05301222		4043.77	0.17762242
334	0.04505006		863.99	0.03583849		1393.99	0.12928518		1923.99	0.14269577		2453.98	0.05174203		2983.98	0.08955336		3513.97	0.05382323		4043.97	0.1788128
334.2	0.04457662		864.19	0.03675515		1394.19	0.12911094		1924.19	0.14320645		2454.18	0.051589		2984.18	0.08901384		3514.17	0.05504443		4044.17	0.17967511
334.4	0.04351361		864.39	0.03673855		1394.39	0.12999751		1924.39	0.14344454		2454.38	0.05121941		2984.38	0.0901591		3514.37	0.05580758		4044.37	0.17987106
334.6	0.04352204		864.59	0.03700419		1394.59	0.13060581		1924.59	0.14405078		2454.58	0.05133452		2984.58	0.09023511		3514.57	0.05765708		4044.57	0.18075871
334.8	0.04270737		864.79	0.03674997		1394.79	0.13101402		1924.79	0.14452653		2454.78	0.05139435		2984.78	0.09064031		3514.77	0.05779838		4044.77	0.18077497
335	0.0429905		864.99	0.03565686		1394.99	0.13132914		1924.99	0.1458858		2454.98	0.05082903		2984.98	0.09098313		3514.97	0.05812772		4044.97	0.18160452
335.2	0.04349949		865.19	0.03474641		1395.19	0.13130271		1925.19	0.14634735		2455.18	0.05130578		2985.18	0.09043667		3515.17	0.05849114		4045.17	0.18198686
335.4	0.04326738		865.39	0.03426688		1395.39	0.13130071		1925.39	0.14636037		2455.38	0.05165015		2985.38	0.09118816		3515.37	0.0583066		4045.37	0.18145884
335.6	0.04325601		865.59	0.03419705		1395.59	0.13209131		1925.59	0.1459364		2455.58	0.05160856		2985.58	0.09146669		3515.57	0.05817576		4045.57	0.18185996
335.8	0.04416557		865.79	0.03470586		1395.79	0.13234297		1925.79	0.14646237		2455.78	0.05125257		2985.78	0.09180821		3515.77	0.05892286		4045.77	0.18168921
336	0.04494638		865.99	0.03340914		1395.99	0.13178725		1925.99	0.14615511		2455.98	0.05211819		2985.98	0.09188483		3515.97	0.05841855		4045.97	0.18217859
336.2	0.04554049		866.19	0.03298517		1396.19	0.1309963		1926.19	0.14639299		2456.18	0.05200488		2986.18	0.09178088		3516.17	0.05772323		4046.17	0.18202554
336.4	0.04695842		866.39	0.03254012		1396.39	0.13030368		1926.39	0.14631746		2456.38	0.05165518		2986.38	0.09204681		3516.37	0.05747046		4046.37	0.18255618
336.6	0.04759066		866.59	0.03232458		1396.59	0.12994097		1926.59	0.14674621		2456.58	0.05179278		2986.58	0.09184473		3516.57	0.05658263		4046.57	0.18261391
336.8	0.04849484		866.79	0.03166006		1396.79	0.13005698		1926.79	0.14698168		2456.78	0.05263518		2986.78	0.09236754		3516.77	0.05576763		4046.77	0.18231914
337	0.04797854		866.99	0.03019648		1396.99	0.12987611		1926.99	0.14620291		2456.98	0.05211752		2986.98	0.09208466		3516.97	0.05512201		4046.97	0.18065284
337.2	0.04804018		867.19	0.02897521		1397.19	0.12933274		1927.19	0.14629169		2457.18	0.05178747		2987.18	0.09125115		3517.17	0.05453212		4047.17	0.18008396
337.4	0.04760802		867.39	0.02922149		1397.39	0.12822719		1927.39	0.1466609		2457.38	0.05238865		2987.38	0.09047949		3517.37	0.05456726		4047.37	0.17999307
337.6	0.04716408		867.59	0.02934291		1397.59	0.12799847		1927.59	0.14714856		2457.58	0.05204947		2987.58	0.0911453		3517.57	0.05351561		4047.57	0.18030065
337.8	0.04664408		867.79	0.02976193		1397.79	0.12808006		1927.79	0.14704525		2457.78	0.0523751		2987.78	0.0910034		3517.77	0.05402804		4047.77	0.18052901
338	0.04613831		867.99	0.02991511		1397.99	0.12807227		1927.99	0.14635604		2457.98	0.05215308		2987.98	0.09111799		3517.97	0.05396718		4047.97	0.18087303
338.2	0.04573081		868.19	0.03053464		1398.19	0.12781203		1928.19	0.14720696		2458.18	0.05196837		2988.18	0.09177589		3518.17	0.05405627		4048.17	0.18154765
338.4	0.04410187		868.39	0.03056163		1398.39	0.12876591		1928.39	0.14790508		2458.38	0.05224244		2988.38	0.09246112		3518.37	0.05416931		4048.37	0.18200537
338.6	0.04352729		868.59	0.03070121		1398.59	0.12877146		1928.59	0.1477788		2458.58	0.05233658		2988.58	0.09270894		3518.57	0.05520078		4048.57	0.18251228
338.8	0.04401721		868.79	0.03079388		1398.79	0.12865725		1928.79	0.14882297		2458.78	0.05262558		2988.78	0.0924457		3518.77	0.05473907		4048.77	0.18279222
339	0.04447887		868.99	0.03183039		1398.99	0.12937096		1928.99	0.14883935		2458.98	0.05280172		2988.98	0.09346703		3518.97	0.05502385		4048.97	0.18329439
339.2	0.0451555		869.19	0.03296819		1399.19	0.12996343		1929.19	0.14822473		2459.18	0.05426243		2989.18	0.09342807		3519.17	0.05552015		4049.17	0.18310817
339.4	0.04538697		869.39	0.03266771		1399.39	0.13087857		1929.39	0.14702981		2459.38	0.05460523		2989.38	0.09448472		3519.37	0.05550145		4049.37	0.18314155
339.6	0.04640827		869.59	0.03314205		1399.59	0.13098472		1929.59	0.14632891		2459.58	0.0544233		2989.58	0.09430003		3519.57	0.05573755		4049.57	0.18308091
339.8	0.0478274		869.79	0.03348452		1399.79	0.13110784		1929.79	0.14631619		2459.78	0.05453486		2989.78	0.09393892		3519.77	0.05685647		4049.77	0.18253212
340	0.04842191		869.99	0.03335506		1399.99	0.13025847		1929.99	0.14584026		2459.98	0.05488998		2989.98	0.09361528		3519.97	0.05690555		4049.97	0.18254743
340.2	0.04963228		870.19	0.03452842		1400.19	0.1308208		1930.19	0.14628248		2460.18	0.05433777		2990.18	0.09428466		3520.17	0.05774014		4050.17	0.18238109
340.4	0.05125936		870.39	0.0345775		1400.39	0.13122541		1930.39	0.14623375		2460.38	0.0544189		2990.38	0.0949821		3520.37	0.05784712		4050.37	0.18320469
340.6	0.05161536		870.59	0.03488444		1400.59	0.131901		1930.59	0.14621796		2460.58	0.05424524		2990.58	0.09534118		3520.57	0.05852719		4050.57	0.18287352
340.8	0.05217689		870.79	0.03441227		1400.79	0.13188052		1930.79	0.14533659		2460.78	0.05448947		2990.78	0.09493677		3520.77	0.05917251		4050.77	0.18223651
341	0.05190179		870.99	0.03436216		1400.99	0.13141853		1930.99	0.14424785		2460.98	0.05352158		2990.98	0.09425277		3520.97	0.05932971		4050.97	0.1829617
341.2	0.0516392		871.19	0.03432732		1401.19	0.13172512		1931.19	0.14457926		2461.18	0.05339201		2991.18	0.09482303		3521.17	0.05906487		4051.17	0.18295966
341.4	0.05148477		871.39	0.03540335		1401.39	0.13172871		1931.39	0.14464861		2461.38	0.05381113		2991.38	0.0950096		3521.37	0.05862938		4051.37	0.18377716
341.6	0.05004108		871.59	0.03549703		1401.59	0.13226282		1931.59	0.14536943		2461.58	0.05366552		2991.58	0.09520821		3521.57	0.05830599		4051.57	0.18351867
341.8	0.04893212		871.79	0.03697092		1401.79	0.13231763		1931.79	0.14605621		2461.78	0.05356047		2991.78	0.09490932		3521.77	0.05826415		4051.77	0.18364713
342	0.04858155		871.99	0.03796803		1401.99	0.13291716		1931.99	0.14723864		2461.98	0.05322839		2991.98	0.09511348		3521.97	0.05792986		4051.97	0.18374758
342.2	0.04811774		872.19	0.03755117		1402.19	0.13295944		1932.19	0.14849917		2462.18	0.0525781		2992.18	0.09546705		3522.17	0.05746163		4052.17	0.18451717
342.4	0.04703354		872.39	0.03757271		1402.39	0.13303526		1932.39	0.14926235		2462.38	0.05228559		2992.38	0.0949355		3522.37	0.05756762		4052.37	0.18433227
342.6	0.04782133		872.59	0.03861394		1402.59	0.13370019		1932.59	0.15021675		2462.58	0.0524456		2992.58	0.09463912		3522.57	0.05772975		4052.57	0.18490561
342.8	0.0480742		872.79	0.03805759		1402.79	0.13403904		1932.79	0.150832		2462.78	0.05407665		2992.78	0.0942412		3522.77	0.05805307		4052.77	0.184948
343	0.04722696		872.99	0.03827244		1402.99	0.13334847		1932.99	0.15076565		2462.98	0.05483308		2992.98	0.09492423		3522.97	0.05751012		4052.97	0.18544819
343.2	0.04748093		873.19	0.03750468		1403.19	0.13360636		1933.19	0.15127948		2463.18	0.05568995		2993.18	0.09379455		3523.17	0.05679433		4053.17	0.18528218
343.4	0.04748242		873.39	0.03612457		1403.39	0.13298556		1933.39	0.15080622		2463.38	0.05562919		2993.38	0.09383135		3523.37	0.05682461		4053.37	0.18564479
343.6	0.04869536		873.59	0.03524543		1403.59	0.13188963		1933.59	0.15132377		2463.58	0.05611145		2993.58	0.09263939		3523.57	0.05667444		4053.57	0.18572778
343.8	0.04890913		873.79	0.03452856		1403.79	0.13270261		1933.79	0.15222158		2463.78	0.05635943		2993.78	0.09273827		3523.77	0.05707927		4053.77	0.1864242
344	0.04861699		873.99	0.03408817		1403.99	0.13263772		1933.99	0.15245359		2463.98	0.05604928		2993.98	0.09387103		3523.97	0.05617308		4053.97	0.18745719
344.2	0.04997842		874.19	0.03427615		1404.19	0.13251121		1934.19	0.15278363		2464.18	0.05569346		2994.18	0.09423105		3524.17	0.05600635		4054.17	0.18792313
344.4	0.05118178		874.39	0.03260026		1404.39	0.13274798		1934.39	0.1525544		2464.38	0.05514847		2994.38	0.0944084		3524.37	0.05561104		4054.37	0.18871626
344.6	0.05143008		874.59	0.031911		1404.59	0.13322657		1934.59	0.15229634		2464.58	0.05517188		2994.58	0.09505124		3524.57	0.05661073		4054.57	0.18898307
344.8	0.05164244		874.79	0.03043926		1404.79	0.13233277		1934.79	0.15235016		2464.78	0.05477324		2994.78	0.09523881		3524.77	0.05702859		4054.77	0.18965087
345	0.05194933		874.99	0.03059576		1404.99	0.13329537		1934.99	0.15177496		2464.98	0.05498717		2994.98	0.09656945		3524.97	0.05698353		4054.97	0.1900007
345.2	0.05138342		875.19	0.02901141		1405.19	0.13464869		1935.19	0.15164937		2465.18	0.0552513		2995.18	0.09679544		3525.17	0.05676175		4055.17	0.18975754
345.4	0.05081357		875.39	0.02943646		1405.39	0.13522373		1935.39	0.15188572		2465.38	0.05580037		2995.38	0.09657271		3525.37	0.05704541		4055.37	0.18959246
345.6	0.05008423		875.59	0.02976776		1405.59	0.13598761		1935.59	0.15251997		2465.58	0.05515779		2995.58	0.09705637		3525.57	0.05760925		4055.57	0.1884741
345.8	0.04973324		875.79	0.03059415		1405.79	0.13601156		1935.79	0.15247002		2465.78	0.05528322		2995.78	0.09730967		3525.77	0.05792763		4055.77	0.18902488
346	0.05017826		875.99	0.03046805		1405.99	0.13624088		1935.99	0.15253463		2465.98	0.05479355		2995.98	0.09746056		3525.97	0.0590286		4055.97	0.18875678
346.2	0.05035763		876.19	0.03109333		1406.19	0.13607124		1936.19	0.15192468		2466.18	0.05418435		2996.18	0.09732854		3526.17	0.0587385		4056.17	0.18877917
346.4	0.05113125		876.39	0.03222254		1406.39	0.13710308		1936.39	0.15157928		2466.38	0.05428361		2996.38	0.09672033		3526.37	0.05948301		4056.37	0.18896043
346.6	0.05118934		876.59	0.03349537		1406.59	0.13718539		1936.59	0.15223843		2466.58	0.05458569		2996.58	0.09620044		3526.57	0.05998743		4056.57	0.18863871
346.8	0.05152616		876.79	0.03330268		1406.79	0.13636232		1936.79	0.15148665		2466.78	0.05585368		2996.78	0.09700704		3526.77	0.05972012		4056.77	0.18820828
347	0.05137345		876.99	0.03431214		1406.99	0.13539619		1936.99	0.15143593		2466.98	0.05578092		2996.98	0.09724918		3526.97	0.0590406		4056.97	0.18799871
347.2	0.05254049		877.19	0.03465224		1407.19	0.13611037		1937.19	0.15156804		2467.18	0.05617766		2997.18	0.09682821		3527.17	0.05908974		4057.17	0.18835984
347.4	0.05200117		877.39	0.03506232		1407.39	0.13533544		1937.39	0.15133886		2467.38	0.0565297		2997.38	0.09692496		3527.37	0.05936799		4057.37	0.18884585
347.6	0.05297355		877.59	0.03557312		1407.59	0.13656021		1937.59	0.15161775		2467.58	0.05701545		2997.58	0.09629497		3527.57	0.05881235		4057.57	0.18947371
347.8	0.05214514		877.79	0.03562413		1407.79	0.13716042		1937.79	0.15207936		2467.78	0.05691414		2997.78	0.09669272		3527.77	0.0587184		4057.77	0.18967962
348	0.05170205		877.99	0.03553805		1407.99	0.13739672		1937.99	0.15207011		2467.98	0.05695378		2997.98	0.09670078		3527.97	0.0578633		4057.97	0.18957975
348.2	0.05206104		878.19	0.03560279		1408.19	0.13716196		1938.19	0.15241057		2468.18	0.05701065		2998.18	0.09666481		3528.17	0.05742968		4058.17	0.18918553
348.4	0.05248245		878.39	0.03455323		1408.39	0.13802037		1938.39	0.15314128		2468.38	0.05709068		2998.38	0.09774181		3528.37	0.05716932		4058.37	0.18979529
348.6	0.05248591		878.59	0.03453762		1408.59	0.138411		1938.59	0.153893		2468.58	0.0573634		2998.58	0.09891743		3528.57	0.05806692		4058.57	0.18921989
348.8	0.05240178		878.79	0.03438259		1408.79	0.13802683		1938.79	0.15431287		2468.78	0.05688002		2998.78	0.09872695		3528.77	0.05830116		4058.77	0.18982198
349	0.05241618		878.99	0.03517561		1408.99	0.13816095		1938.99	0.15407599		2468.98	0.05724944		2998.98	0.09848166		3528.97	0.05776837		4058.97	0.19015163
349.2	0.05170164		879.19	0.03415397		1409.19	0.13753451		1939.19	0.15439081		2469.18	0.05721355		2999.18	0.09727179		3529.17	0.05741842		4059.17	0.19003779
349.4	0.05068435		879.39	0.0340144		1409.39	0.1380037		1939.39	0.15488764		2469.38	0.05806233		2999.38	0.09742923		3529.37	0.0581831		4059.37	0.18947565
349.6	0.04957818		879.59	0.03402904		1409.59	0.13814316		1939.59	0.15524469		2469.58	0.05846046		2999.58	0.0976482		3529.57	0.05822935		4059.57	0.18956641
349.8	0.04976526		879.79	0.03378868		1409.79	0.13823607		1939.79	0.15539835		2469.78	0.05886015		2999.78	0.09680469		3529.77	0.05893195		4059.77	0.18994736
350	0.05045262		879.99	0.03330145		1409.99	0.13829558		1939.99	0.15591433		2469.98	0.05854761		2999.98	0.09603147		3529.97	0.059456		4059.97	0.18992108
350.2	0.05097151		880.19	0.03348146		1410.19	0.13876611		1940.19	0.15514552		2470.18	0.05853363		3000.18	0.09674234		3530.17	0.05998463		4060.17	0.19068983
350.4	0.05145478		880.39	0.03294179		1410.39	0.13979818		1940.39	0.15501347		2470.38	0.05885036		3000.38	0.09749655		3530.37	0.06029582		4060.37	0.19059998
350.6	0.05083277		880.59	0.0324625		1410.59	0.13948534		1940.59	0.15585201		2470.58	0.05827037		3000.58	0.0979644		3530.57	0.06112418		4060.57	0.19054964
350.8	0.05110615		880.79	0.03117187		1410.79	0.13934277		1940.79	0.15658757		2470.78	0.05909825		3000.78	0.09889644		3530.77	0.06093501		4060.77	0.19039334
351	0.05109357		880.99	0.03048662		1410.99	0.13917266		1940.99	0.15624779		2470.98	0.05893074		3000.98	0.09862498		3530.97	0.06096406		4060.97	0.1904399
351.2	0.0513031		881.19	0.03026612		1411.19	0.13967936		1941.19	0.15623555		2471.18	0.05925819		3001.18	0.0979009		3531.17	0.06149359		4061.17	0.19153451
351.4	0.05103976		881.39	0.02996131		1411.39	0.13940754		1941.39	0.15616467		2471.38	0.06005137		3001.38	0.0983876		3531.37	0.06173578		4061.37	0.19155413
351.6	0.05168411		881.59	0.0305391		1411.59	0.14042201		1941.59	0.15588736		2471.58	0.06022802		3001.58	0.09813098		3531.57	0.06173419		4061.57	0.19119968
351.8	0.05159402		881.79	0.03098736		1411.79	0.13967619		1941.79	0.15546817		2471.78	0.06013564		3001.78	0.09818044		3531.77	0.06178117		4061.77	0.1908168
352	0.05135113		881.99	0.03107379		1411.99	0.13958744		1941.99	0.15529117		2471.98	0.05911456		3001.98	0.09852507		3531.97	0.06123387		4061.97	0.19125915
352.2	0.05210371		882.19	0.03194914		1412.19	0.13907741		1942.19	0.15599395		2472.18	0.0589522		3002.18	0.09933884		3532.17	0.06079598		4062.17	0.19084802
352.4	0.05240182		882.39	0.03276609		1412.39	0.13885587		1942.39	0.1562348		2472.38	0.05914584		3002.38	0.09997996		3532.37	0.06120676		4062.37	0.19120327
352.6	0.05254758		882.59	0.03378283		1412.59	0.13902999		1942.59	0.15590416		2472.58	0.05833019		3002.58	0.10012843		3532.57	0.06180311		4062.57	0.19177022
352.8	0.05256185		882.79	0.03396277		1412.79	0.13810004		1942.79	0.15643841		2472.78	0.05786178		3002.78	0.09940992		3532.77	0.0606027		4062.77	0.19268351
353	0.05186691		882.99	0.03450103		1412.99	0.13819235		1942.99	0.15703148		2472.98	0.0576064		3002.98	0.10002888		3532.97	0.05937833		4062.97	0.19239941
353.2	0.05119755		883.19	0.03373285		1413.19	0.13817954		1943.19	0.15763411		2473.18	0.05776829		3003.18	0.09995739		3533.17	0.05898339		4063.17	0.19242622
353.4	0.05012285		883.39	0.03380586		1413.39	0.13867397		1943.39	0.15799431		2473.38	0.05811847		3003.38	0.10081281		3533.37	0.05882987		4063.37	0.19337833
353.6	0.04973407		883.59	0.03413395		1413.59	0.13894822		1943.59	0.15767815		2473.58	0.05876288		3003.58	0.10127539		3533.57	0.05899682		4063.57	0.1933407
353.8	0.05035132		883.79	0.03291404		1413.79	0.13845266		1943.79	0.15715708		2473.78	0.05884233		3003.78	0.10096727		3533.77	0.05928496		4063.77	0.19334965
354	0.0505128		883.99	0.0323343		1413.99	0.13787488		1943.99	0.15681973		2473.98	0.05915954		3003.98	0.10140459		3533.97	0.05849642		4063.97	0.19405077
354.2	0.05037889		884.19	0.03094387		1414.19	0.13869808		1944.19	0.15636889		2474.18	0.05904412		3004.18	0.10234335		3534.17	0.05896189		4064.17	0.1950107
354.4	0.05011752		884.39	0.03078599		1414.39	0.13870457		1944.39	0.15704815		2474.38	0.05887136		3004.38	0.10295352		3534.37	0.05900976		4064.37	0.19508953
354.6	0.0504861		884.59	0.0294981		1414.59	0.13863032		1944.59	0.15779183		2474.58	0.05827		3004.58	0.10340573		3534.57	0.05975295		4064.57	0.19599428
354.8	0.05109218		884.79	0.02865351		1414.79	0.13818708		1944.79	0.15716288		2474.78	0.05920637		3004.78	0.10315039		3534.77	0.05959555		4064.77	0.19669677
355	0.05194985		884.99	0.02925902		1414.99	0.13773191		1944.99	0.15653704		2474.98	0.05906798		3004.98	0.10241558		3534.97	0.05975881		4064.97	0.19807686
355.2	0.05237836		885.19	0.02921279		1415.19	0.13759889		1945.19	0.15611051		2475.18	0.05957863		3005.18	0.10210813		3535.17	0.06074721		4065.17	0.19895314
355.4	0.05354916		885.39	0.02910273		1415.39	0.13726342		1945.39	0.15528235		2475.38	0.0594354		3005.38	0.10200232		3535.37	0.06101127		4065.37	0.19829343
355.6	0.05355863		885.59	0.02988964		1415.59	0.13739153		1945.59	0.15461492		2475.58	0.05845397		3005.58	0.10071526		3535.57	0.0613748		4065.57	0.1976512
355.8	0.05388201		885.79	0.03045428		1415.79	0.13682658		1945.79	0.15478787		2475.78	0.058361		3005.78	0.10081877		3535.77	0.06085645		4065.77	0.1980735
356	0.05452534		885.99	0.03009756		1415.99	0.13683788		1945.99	0.15559181		2475.98	0.05780985		3005.98	0.10084459		3535.97	0.06078802		4065.97	0.19832862
356.2	0.05517609		886.19	0.03080314		1416.19	0.13764851		1946.19	0.1562076		2476.18	0.05892977		3006.18	0.10071828		3536.17	0.06194932		4066.17	0.19794972
356.4	0.05537967		886.39	0.03064232		1416.39	0.13790429		1946.39	0.15663201		2476.38	0.05876959		3006.38	0.10059774		3536.37	0.06228366		4066.37	0.19839775
356.6	0.05514289		886.59	0.03067465		1416.59	0.13922175		1946.59	0.15721311		2476.58	0.05824502		3006.58	0.10099426		3536.57	0.06216001		4066.57	0.19799626
356.8	0.05534449		886.79	0.0300479		1416.79	0.13975428		1946.79	0.15803171		2476.78	0.05873588		3006.78	0.10167938		3536.77	0.06124024		4066.77	0.19725501
357	0.0542307		886.99	0.03061999		1416.99	0.14070918		1946.99	0.15885694		2476.98	0.05948692		3006.98	0.10214225		3536.97	0.06088477		4066.97	0.19717274
357.2	0.0540607		887.19	0.0303764		1417.19	0.14053885		1947.19	0.16007733		2477.18	0.06034729		3007.18	0.10182199		3537.17	0.06157153		4067.17	0.19667718
357.4	0.05341132		887.39	0.03002241		1417.39	0.14128172		1947.39	0.16017225		2477.38	0.06154636		3007.38	0.10189619		3537.37	0.06182117		4067.37	0.19677047
357.6	0.05315016		887.59	0.02970425		1417.59	0.1417534		1947.59	0.16044381		2477.58	0.06261647		3007.58	0.10197918		3537.57	0.06238086		4067.57	0.19619921
357.8	0.05331769		887.79	0.02961196		1417.79	0.14173379		1947.79	0.16124689		2477.78	0.06271114		3007.78	0.10105654		3537.77	0.06212037		4067.77	0.19552833
358	0.05363059		887.99	0.030385		1417.99	0.14211282		1947.99	0.16215364		2477.98	0.06312618		3007.98	0.1016972		3537.97	0.0618428		4067.97	0.19509403
358.2	0.05354026		888.19	0.03056812		1418.19	0.14345837		1948.19	0.16233429		2478.18	0.06285151		3008.18	0.10231765		3538.17	0.06248612		4068.17	0.19501457
358.4	0.054572		888.39	0.03146903		1418.39	0.14336654		1948.39	0.16240072		2478.38	0.06281095		3008.38	0.1029476		3538.37	0.06225499		4068.37	0.19474572
358.6	0.05576852		888.59	0.03157748		1418.59	0.14311217		1948.59	0.16201236		2478.58	0.06381166		3008.58	0.10181416		3538.57	0.06193957		4068.57	0.19539165
358.8	0.05619888		888.79	0.0317278		1418.79	0.14321666		1948.79	0.16119284		2478.78	0.06380127		3008.78	0.10077932		3538.77	0.06154209		4068.77	0.19500341
359	0.0573627		888.99	0.03178203		1418.99	0.14276598		1948.99	0.1610025		2478.98	0.0638639		3008.98	0.10131603		3538.97	0.0616429		4068.97	0.19432504
359.2	0.05831923		889.19	0.0313807		1419.19	0.1421183		1949.19	0.15983092		2479.18	0.06434529		3009.18	0.10090089		3539.17	0.06172638		4069.17	0.19337294
359.4	0.05893028		889.39	0.03150737		1419.39	0.14209823		1949.39	0.16007843		2479.38	0.06419478		3009.38	0.10060444		3539.37	0.06214685		4069.37	0.19337999
359.6	0.05869224		889.59	0.03185945		1419.59	0.14152626		1949.59	0.1594379		2479.58	0.06380863		3009.58	0.10127238		3539.57	0.06195543		4069.57	0.19442668
359.8	0.05906264		889.79	0.03222112		1419.79	0.14125105		1949.79	0.16063966		2479.78	0.06417457		3009.78	0.10175891		3539.77	0.06121573		4069.77	0.19462896
360	0.0599754		889.99	0.03258616		1419.99	0.14053105		1949.99	0.16082927		2479.98	0.06382459		3009.98	0.10137231		3539.97	0.06102771		4069.97	0.1947425
360.2	0.05937028		890.19	0.03208872		1420.19	0.13998485		1950.19	0.15962632		2480.18	0.06400741		3010.18	0.10063547		3540.17	0.06201832		4070.17	0.19575265
360.4	0.05963714		890.39	0.03208671		1420.39	0.13892914		1950.39	0.15855259		2480.38	0.06356921		3010.38	0.10109086		3540.37	0.0616925		4070.37	0.19595488
360.6	0.05905601		890.59	0.03199552		1420.59	0.13897355		1950.59	0.15798305		2480.58	0.06390461		3010.58	0.10201002		3540.57	0.06108057		4070.57	0.19673631
360.8	0.05896335		890.79	0.03223285		1420.79	0.13865861		1950.79	0.15745153		2480.78	0.06488604		3010.78	0.10322871		3540.77	0.06104191		4070.77	0.19803762
361	0.05795344		890.99	0.03173672		1420.99	0.13790612		1950.99	0.15798207		2480.98	0.06425623		3010.98	0.10375385		3540.97	0.06124242		4070.97	0.19877658
361.2	0.05768618		891.19	0.03105059		1421.19	0.1372762		1951.19	0.15831792		2481.18	0.06350846		3011.18	0.10480228		3541.17	0.06234028		4071.17	0.19854482
361.4	0.05691865		891.39	0.03140223		1421.39	0.13729322		1951.39	0.15877683		2481.38	0.06339682		3011.38	0.10507194		3541.37	0.06321376		4071.37	0.1997055
361.6	0.05744851		891.59	0.03135163		1421.59	0.13714564		1951.59	0.15968965		2481.58	0.06376371		3011.58	0.10568588		3541.57	0.06357004		4071.57	0.19993077
361.8	0.05724617		891.79	0.03203054		1421.79	0.13733409		1951.79	0.16014174		2481.78	0.06374779		3011.78	0.10573668		3541.77	0.06370194		4071.77	0.19986847
362	0.05747721		891.99	0.0320116		1421.99	0.13795747		1951.99	0.15994699		2481.98	0.06359459		3011.98	0.10630962		3541.97	0.06364085		4071.97	0.20062205
362.2	0.05830906		892.19	0.03285756		1422.19	0.13940685		1952.19	0.15927307		2482.18	0.06335044		3012.18	0.10587579		3542.17	0.0640923		4072.17	0.20090264
362.4	0.05905418		892.39	0.0322011		1422.39	0.1396415		1952.39	0.15916084		2482.38	0.06351032		3012.38	0.10547661		3542.37	0.06387983		4072.37	0.20069461
362.6	0.05941391		892.59	0.03193223		1422.59	0.14074658		1952.59	0.15875237		2482.58	0.06410563		3012.58	0.10451167		3542.57	0.06461268		4072.57	0.20045202
362.8	0.05982178		892.79	0.03120407		1422.79	0.14273259		1952.79	0.15875768		2482.78	0.06371378		3012.78	0.10484186		3542.77	0.06490544		4072.77	0.19942434
363	0.06033117		892.99	0.03054917		1422.99	0.14238386		1952.99	0.15878815		2482.98	0.06394684		3012.98	0.10527261		3542.97	0.06566311		4072.97	0.19844826
363.2	0.06045828		893.19	0.03045791		1423.19	0.14295427		1953.19	0.15860164		2483.18	0.06362706		3013.18	0.10384537		3543.17	0.06586308		4073.17	0.19911384
363.4	0.06114031		893.39	0.03061172		1423.39	0.14366073		1953.39	0.1585207		2483.38	0.06308699		3013.38	0.10326168		3543.37	0.06614526		4073.37	0.20023937
363.6	0.06058078		893.59	0.03077037		1423.59	0.14407195		1953.59	0.15780525		2483.58	0.06180951		3013.58	0.10318002		3543.57	0.06528918		4073.57	0.20053887
363.8	0.05994566		893.79	0.03056701		1423.79	0.14435404		1953.79	0.15899674		2483.78	0.06202067		3013.78	0.1028744		3543.77	0.06468447		4073.77	0.20023371
364	0.0596572		893.99	0.03014996		1423.99	0.14415102		1953.99	0.15832007		2483.98	0.0622948		3013.98	0.10204446		3543.97	0.06392654		4073.97	0.20077913
364.2	0.05871001		894.19	0.03005967		1424.19	0.14398271		1954.19	0.15801508		2484.18	0.0623497		3014.18	0.10213954		3544.17	0.06417205		4074.17	0.20132641
364.4	0.05785813		894.39	0.03095206		1424.39	0.14342351		1954.39	0.15830955		2484.38	0.06273271		3014.38	0.10289554		3544.37	0.06337743		4074.37	0.20032375
364.6	0.05781071		894.59	0.03055625		1424.59	0.14350391		1954.59	0.15886702		2484.58	0.06261657		3014.58	0.10362233		3544.57	0.06295952		4074.57	0.20067321
364.8	0.05744489		894.79	0.03128538		1424.79	0.1432166		1954.79	0.15893791		2484.78	0.06283389		3014.78	0.1048861		3544.77	0.06261267		4074.77	0.20052337
365	0.05751327		894.99	0.03112086		1424.99	0.14186026		1954.99	0.15970423		2484.98	0.06175643		3014.98	0.10615373		3544.97	0.06223188		4074.97	0.20003746
365.2	0.05731899		895.19	0.03124268		1425.19	0.1417334		1955.19	0.16054393		2485.18	0.06200023		3015.18	0.10714198		3545.17	0.06226356		4075.17	0.19966048
365.4	0.05773368		895.39	0.03304776		1425.39	0.14200844		1955.39	0.16196375		2485.38	0.06328403		3015.38	0.10786633		3545.37	0.06266435		4075.37	0.20076732
365.6	0.05768539		895.59	0.03351675		1425.59	0.14144695		1955.59	0.16179234		2485.58	0.06382225		3015.58	0.1084353		3545.57	0.06167522		4075.57	0.20147108
365.8	0.05752919		895.79	0.03435708		1425.79	0.14066074		1955.79	0.16202166		2485.78	0.06330577		3015.78	0.10904673		3545.77	0.06151052		4075.77	0.20121345
366	0.05819669		895.99	0.03418868		1425.99	0.1411001		1955.99	0.16236765		2485.98	0.06331439		3015.98	0.10896208		3545.97	0.06184381		4075.97	0.20201658
366.2	0.05842131		896.19	0.03512057		1426.19	0.14122845		1956.19	0.16231703		2486.18	0.063423		3016.18	0.10934313		3546.17	0.0623783		4076.17	0.20103104
366.4	0.05874497		896.39	0.0338042		1426.39	0.14151278		1956.39	0.1629349		2486.38	0.06306537		3016.38	0.1095866		3546.37	0.06252085		4076.37	0.20094258
366.6	0.05972853		896.59	0.03415745		1426.59	0.14220661		1956.59	0.16278581		2486.58	0.06259966		3016.58	0.10865158		3546.57	0.06335214		4076.57	0.20061864
366.8	0.05949012		896.79	0.03378871		1426.79	0.14238914		1956.79	0.16331072		2486.78	0.06224885		3016.78	0.10877921		3546.77	0.06439082		4076.77	0.20100423
367	0.06026652		896.99	0.03256916		1426.99	0.14153446		1956.99	0.16338982		2486.98	0.06153607		3016.98	0.1077012		3546.97	0.06547086		4076.97	0.20155109
367.2	0.06154756		897.19	0.03241409		1427.19	0.1419587		1957.19	0.16237035		2487.18	0.06121305		3017.18	0.10642952		3547.17	0.0660588		4077.17	0.20279993
367.4	0.06267777		897.39	0.03154905		1427.39	0.14227092		1957.39	0.16225999		2487.38	0.06060286		3017.38	0.10689185		3547.37	0.06656689		4077.37	0.20358333
367.6	0.06169842		897.59	0.03103334		1427.59	0.14325566		1957.59	0.16256566		2487.58	0.06062178		3017.58	0.10688529		3547.57	0.06641421		4077.57	0.20355498
367.8	0.06105775		897.79	0.03100297		1427.79	0.14349727		1957.79	0.16268842		2487.78	0.06214996		3017.78	0.10579024		3547.77	0.06647433		4077.77	0.2033572
368	0.06190228		897.99	0.03076815		1427.99	0.14379424		1957.99	0.16315005		2487.98	0.06225197		3017.98	0.10588211		3547.97	0.06640595		4077.97	0.20291941
368.2	0.06189186		898.19	0.03066943		1428.19	0.14366258		1958.19	0.16372037		2488.18	0.06206187		3018.18	0.10527448		3548.17	0.06694593		4078.17	0.20167052
368.4	0.06142172		898.39	0.03108093		1428.39	0.14409278		1958.39	0.16364048		2488.38	0.06324877		3018.38	0.10461595		3548.37	0.06696931		4078.37	0.2010844
368.6	0.06256548		898.59	0.03098354		1428.59	0.14445401		1958.59	0.16304717		2488.58	0.06364361		3018.58	0.10402285		3548.57	0.06732037		4078.57	0.20125571
368.8	0.06234985		898.79	0.03204342		1428.79	0.14480594		1958.79	0.16330964		2488.78	0.06510134		3018.78	0.10336756		3548.77	0.06653982		4078.77	0.20089295
369	0.06258039		898.99	0.0319267		1428.99	0.14458143		1958.99	0.16348972		2488.98	0.06516503		3018.98	0.10371565		3548.97	0.06697831		4078.97	0.20174702
369.2	0.06233746		899.19	0.03230746		1429.19	0.14526174		1959.19	0.16303345		2489.18	0.06603879		3019.18	0.10351798		3549.17	0.06645205		4079.17	0.2022893
369.4	0.06270179		899.39	0.03333498		1429.39	0.14508508		1959.39	0.16276396		2489.38	0.06666716		3019.38	0.103191		3549.37	0.06592335		4079.37	0.20267209
369.6	0.06227158		899.59	0.03307581		1429.59	0.14498447		1959.59	0.16171444		2489.58	0.06653		3019.58	0.1029299		3549.57	0.06532414		4079.57	0.20290808
369.8	0.06365382		899.79	0.03272006		1429.79	0.14442559		1959.79	0.16155345		2489.78	0.06602348		3019.78	0.10241823		3549.77	0.06622175		4079.77	0.20328993
370	0.06421954		899.99	0.03297489		1429.99	0.14465743		1959.99	0.16205112		2489.98	0.06596261		3019.98	0.10225336		3549.97	0.06688955		4079.97	0.20424815
370.2	0.06405439		900.19	0.03401297		1430.19	0.14463901		1960.19	0.16156678		2490.18	0.0650204		3020.18	0.10215951		3550.17	0.06661125		4080.17	0.20442377
370.4	0.06520617		900.39	0.03315067		1430.39	0.14502814		1960.39	0.16158736		2490.38	0.06510788		3020.38	0.1016348		3550.37	0.06706249		4080.37	0.20489823
370.6	0.06452077		900.59	0.0339536		1430.59	0.1456446		1960.59	0.16171845		2490.58	0.0650388		3020.58	0.10232774		3550.57	0.06714271		4080.57	0.20531996
370.8	0.06436591		900.79	0.03339514		1430.79	0.14585648		1960.79	0.16216486		2490.78	0.06548666		3020.78	0.10273622		3550.77	0.06767346		4080.77	0.20673787
371	0.06489145		900.99	0.03310292		1430.99	0.14594075		1960.99	0.16246806		2490.98	0.06595663		3020.98	0.10288732		3550.97	0.0675561		4080.97	0.2076741
371.2	0.06545549		901.19	0.03293129		1431.19	0.14620572		1961.19	0.16212159		2491.18	0.06623589		3021.18	0.10347952		3551.17	0.06713548		4081.17	0.20760857
371.4	0.06485553		901.39	0.03274367		1431.39	0.14678362		1961.39	0.16270064		2491.38	0.06647984		3021.38	0.10487871		3551.37	0.06628088		4081.37	0.20826399
371.6	0.06433585		901.59	0.03234419		1431.59	0.14720887		1961.59	0.16285529		2491.58	0.06683214		3021.58	0.10439975		3551.57	0.06606239		4081.57	0.2078275
371.8	0.06454985		901.79	0.0328594		1431.79	0.14749655		1961.79	0.16312535		2491.78	0.06788293		3021.78	0.10535004		3551.77	0.06696365		4081.77	0.20739857
372	0.0653162		901.99	0.03209843		1431.99	0.14765595		1961.99	0.16401948		2491.98	0.06747484		3021.98	0.10657373		3551.97	0.06771825		4081.97	0.20731237
372.2	0.0643185		902.19	0.03182077		1432.19	0.14700387		1962.19	0.16429213		2492.18	0.06754682		3022.18	0.1058803		3552.17	0.06727378		4082.17	0.20719437
372.4	0.06266225		902.39	0.0322772		1432.39	0.14831393		1962.39	0.16459973		2492.38	0.06843107		3022.38	0.10656061		3552.37	0.06712593		4082.37	0.20692908
372.6	0.06307414		902.59	0.03198622		1432.59	0.14804385		1962.59	0.16590835		2492.58	0.06921423		3022.58	0.1065335		3552.57	0.06745746		4082.57	0.20697916
372.8	0.0616742		902.79	0.03182432		1432.79	0.14865188		1962.79	0.16766072		2492.78	0.06994378		3022.78	0.10707664		3552.77	0.06801486		4082.77	0.20687957
373	0.0622446		902.99	0.03172891		1432.99	0.14838936		1962.99	0.16721425		2492.98	0.06979297		3022.98	0.10796657		3552.97	0.06863881		4082.97	0.20724049
373.2	0.06194409		903.19	0.03168258		1433.19	0.14816311		1963.19	0.16717095		2493.18	0.07012303		3023.18	0.10792678		3553.17	0.06721541		4083.17	0.20712731
373.4	0.06253274		903.39	0.03157122		1433.39	0.14827631		1963.39	0.16743926		2493.38	0.07013748		3023.38	0.10807426		3553.37	0.0674477		4083.37	0.20694644
373.6	0.06263556		903.59	0.03182715		1433.59	0.14834874		1963.59	0.16721927		2493.58	0.06974632		3023.58	0.10805889		3553.57	0.06758274		4083.57	0.20858615
373.8	0.06296008		903.79	0.0332728		1433.79	0.14736004		1963.79	0.16720178		2493.78	0.06943154		3023.78	0.10800033		3553.77	0.0680765		4083.77	0.2090849
374	0.06236539		903.99	0.03371092		1433.99	0.14807863		1963.99	0.16724983		2493.98	0.06977691		3023.98	0.10807131		3553.97	0.068259		4083.97	0.20907483
374.2	0.06157201		904.19	0.03419282		1434.19	0.14745428		1964.19	0.16675331		2494.18	0.06946435		3024.18	0.10751195		3554.17	0.06752677		4084.17	0.21014982
374.4	0.06195353		904.39	0.03423722		1434.39	0.14752706		1964.39	0.1667502		2494.38	0.07003624		3024.38	0.10693484		3554.37	0.06792063		4084.37	0.21018814
374.6	0.06129545		904.59	0.03496006		1434.59	0.14754126		1964.59	0.16656163		2494.58	0.06969948		3024.58	0.1069463		3554.57	0.06749527		4084.57	0.2109513
374.8	0.06232212		904.79	0.03432344		1434.79	0.14695422		1964.79	0.16695401		2494.78	0.06992382		3024.78	0.10587426		3554.77	0.06723416		4084.77	0.21124657
375	0.0629884		904.99	0.03360392		1434.99	0.14646139		1964.99	0.16682998		2494.98	0.06935391		3024.98	0.10608563		3554.97	0.06749989		4084.97	0.21063244
375.2	0.06372743		905.19	0.03334458		1435.19	0.14651905		1965.19	0.16693153		2495.18	0.06814155		3025.18	0.1058189		3555.17	0.06700007		4085.17	0.20973236
375.4	0.06319575		905.39	0.03343688		1435.39	0.14675023		1965.39	0.16715177		2495.38	0.06717315		3025.38	0.10603698		3555.37	0.06633888		4085.37	0.21048013
375.6	0.06394333		905.59	0.03274753		1435.59	0.14680872		1965.59	0.16790323		2495.58	0.06544077		3025.58	0.10641798		3555.57	0.06690947		4085.57	0.21017844
375.8	0.06432347		905.79	0.03338503		1435.79	0.14769503		1965.79	0.16799223		2495.78	0.0660042		3025.78	0.10699427		3555.77	0.06712417		4085.77	0.20969475
376	0.06437352		905.99	0.0329186		1435.99	0.14749836		1965.99	0.16840622		2495.98	0.06542697		3025.98	0.1063907		3555.97	0.06652503		4085.97	0.21030749
376.2	0.06412952		906.19	0.03262806		1436.19	0.14731448		1966.19	0.16929983		2496.18	0.06548554		3026.18	0.10738942		3556.17	0.06590962		4086.17	0.2100187
376.4	0.06321768		906.39	0.0321968		1436.39	0.14888778		1966.39	0.16999333		2496.38	0.06506312		3026.38	0.10783366		3556.37	0.0664274		4086.37	0.20915899
376.6	0.06369552		906.59	0.03178988		1436.59	0.1482626		1966.59	0.17119532		2496.58	0.06616188		3026.58	0.1078713		3556.57	0.06672853		4086.57	0.20948701
376.8	0.06364941		906.79	0.03153851		1436.79	0.14845421		1966.79	0.17083704		2496.78	0.06587519		3026.78	0.10826083		3556.77	0.06684703		4086.77	0.20957806
377	0.06448756		906.99	0.03207968		1436.99	0.14844597		1966.99	0.16956243		2496.98	0.06642104		3026.98	0.10895761		3556.97	0.06604591		4086.97	0.20973969
377.2	0.06439073		907.19	0.03170907		1437.19	0.14916924		1967.19	0.16911404		2497.18	0.06683979		3027.18	0.10936688		3557.17	0.06537082		4087.17	0.20986559
377.4	0.0651278		907.39	0.03163968		1437.39	0.14969116		1967.39	0.16873887		2497.38	0.06728927		3027.38	0.11073101		3557.37	0.06566704		4087.37	0.21014999
377.6	0.06469648		907.59	0.0321444		1437.59	0.15014084		1967.59	0.16822946		2497.58	0.06786146		3027.58	0.11121818		3557.57	0.06581215		4087.57	0.21057736
377.8	0.06465556		907.79	0.03250874		1437.79	0.15035891		1967.79	0.16739785		2497.78	0.06919075		3027.78	0.1120626		3557.77	0.06681525		4087.77	0.21040999
378	0.06465842		907.99	0.03187928		1437.99	0.15079173		1967.99	0.16659824		2497.98	0.0699514		3027.98	0.11206549		3557.97	0.06750003		4087.97	0.21115038
378.2	0.06467003		908.19	0.0321382		1438.19	0.14960766		1968.19	0.16603396		2498.18	0.07018308		3028.18	0.11223842		3558.17	0.06806681		4088.17	0.21226234
378.4	0.06533608		908.39	0.03222156		1438.39	0.14991486		1968.39	0.16541202		2498.38	0.07045937		3028.38	0.11203265		3558.37	0.06924115		4088.37	0.21243591
378.6	0.06570539		908.59	0.032142		1438.59	0.14962495		1968.59	0.16497759		2498.58	0.07054782		3028.58	0.11238722		3558.57	0.06987937		4088.57	0.21266336
378.8	0.06666005		908.79	0.03205542		1438.79	0.14950144		1968.79	0.1653113		2498.78	0.070253		3028.78	0.11276304		3558.77	0.07048687		4088.77	0.21268738
379	0.06695784		908.99	0.03259902		1438.99	0.14969996		1968.99	0.16514857		2498.98	0.06932519		3028.98	0.11333235		3558.97	0.07128408		4088.97	0.21277197
379.2	0.06669616		909.19	0.03384094		1439.19	0.1501317		1969.19	0.16585277		2499.18	0.06855297		3029.18	0.11330429		3559.17	0.07114017		4089.17	0.21342398
379.4	0.06664009		909.39	0.03441795		1439.39	0.15027647		1969.39	0.16640313		2499.38	0.06777107		3029.38	0.11362841		3559.37	0.071181		4089.37	0.2144416
379.6	0.0671772		909.59	0.035365		1439.59	0.15034505		1969.59	0.16693058		2499.58	0.06716571		3029.58	0.11384374		3559.57	0.07142152		4089.57	0.21457806
379.8	0.06736073		909.79	0.03621957		1439.79	0.15084185		1969.79	0.16702564		2499.78	0.06786732		3029.78	0.1134627		3559.77	0.07132134		4089.77	0.21493597
380	0.06736073		909.99	0.03621957		1439.99	0.15084185		1969.98	0.16702564		2499.98	0.06786732		3029.97	0.1134627		3559.97	0.07132134		4089.97	0.21493597
380.2	0.06878271		910.19	0.03559833		1440.19	0.15114791		1970.18	0.16681247		2500.18	0.06895768		3030.17	0.11446526		3560.17	0.07173725		4090.17	0.21489252
380.4	0.07012361		910.39	0.03583666		1440.39	0.15174837		1970.38	0.16681905		2500.38	0.07009818		3030.37	0.11594201		3560.37	0.0724246		4090.37	0.21553444
380.6	0.07052595		910.59	0.03497696		1440.59	0.15224719		1970.58	0.16757301		2500.58	0.07159908		3030.57	0.11656592		3560.57	0.07262208		4090.57	0.21589492
380.8	0.07115545		910.79	0.0345964		1440.79	0.15242746		1970.78	0.16802761		2500.78	0.07296449		3030.77	0.11854353		3560.77	0.07314683		4090.77	0.2158869
381	0.07153718		910.99	0.03389151		1440.99	0.15199079		1970.98	0.16806066		2500.98	0.07406396		3030.97	0.12012137		3560.97	0.07325428		4090.97	0.21592416
381.2	0.07214409		911.19	0.03325874		1441.19	0.15201366		1971.18	0.1679189		2501.18	0.07516474		3031.17	0.12099073		3561.17	0.07352829		4091.17	0.21534133
381.4	0.0721842		911.39	0.0330488		1441.39	0.15148273		1971.38	0.16815104		2501.38	0.07535553		3031.37	0.12191358		3561.37	0.07393673		4091.37	0.21475141
381.6	0.07260716		911.59	0.0329621		1441.59	0.15140651		1971.58	0.16792336		2501.58	0.07550363		3031.57	0.12248216		3561.57	0.07400323		4091.57	0.21419078
381.8	0.07287825		911.79	0.03258091		1441.79	0.15092071		1971.78	0.16758579		2501.78	0.07519606		3031.77	0.12349841		3561.77	0.07414149		4091.77	0.21446717
382	0.07301669		911.99	0.03177982		1441.99	0.15054634		1971.98	0.16813377		2501.98	0.07527094		3031.97	0.12399099		3561.97	0.07347579		4091.97	0.21363463
382.2	0.07137916		912.19	0.0314202		1442.19	0.150609		1972.18	0.16822696		2502.18	0.07499161		3032.17	0.12392057		3562.17	0.07262279		4092.17	0.21294168
382.4	0.07045451		912.39	0.0307647		1442.39	0.14945043		1972.38	0.16829834		2502.38	0.07536831		3032.37	0.12358301		3562.37	0.07276775		4092.37	0.21172016
382.6	0.06964263		912.59	0.03066664		1442.59	0.14956446		1972.58	0.16927435		2502.58	0.0754086		3032.57	0.12329896		3562.57	0.07381452		4092.57	0.212385
382.8	0.07040388		912.79	0.03134195		1442.79	0.14994354		1972.78	0.17004372		2502.78	0.07452909		3032.77	0.1228582		3562.77	0.07418043		4092.77	0.21297607
383	0.07016312		912.99	0.03147643		1442.99	0.15066104		1972.98	0.17098112		2502.98	0.07416132		3032.97	0.12296085		3562.97	0.0728593		4092.97	0.21377908
383.2	0.07061317		913.19	0.03143809		1443.19	0.15045172		1973.18	0.17054698		2503.18	0.07366857		3033.17	0.12342063		3563.17	0.07235904		4093.17	0.21479972
383.4	0.07149757		913.39	0.03187298		1443.39	0.15096324		1973.38	0.17024339		2503.38	0.07341686		3033.37	0.12279272		3563.37	0.07187414		4093.37	0.21468646
383.6	0.07110833		913.59	0.03126351		1443.59	0.15059989		1973.58	0.16996336		2503.58	0.07317165		3033.57	0.12297532		3563.57	0.07148072		4093.57	0.21534109
383.8	0.07136576		913.79	0.03065906		1443.79	0.15042789		1973.78	0.17002862		2503.78	0.07235215		3033.77	0.12230341		3563.77	0.07189043		4093.77	0.21631066
384	0.07164534		913.99	0.03039295		1443.99	0.14970239		1973.98	0.17031009		2503.98	0.0723353		3033.97	0.12251716		3563.97	0.07227356		4093.97	0.21617849
384.2	0.07167607		914.19	0.03005439		1444.19	0.15015411		1974.18	0.16983935		2504.18	0.07232142		3034.17	0.12222647		3564.17	0.07158195		4094.17	0.21701054
384.4	0.07163354		914.39	0.03075404		1444.39	0.15044212		1974.38	0.16968689		2504.38	0.07236571		3034.37	0.12243634		3564.37	0.0724595		4094.37	0.2182848
384.6	0.07038574		914.59	0.03021203		1444.59	0.14976687		1974.58	0.16967873		2504.58	0.07253508		3034.57	0.12167828		3564.57	0.07197266		4094.57	0.21881358
384.8	0.07060825		914.79	0.03026295		1444.79	0.1492055		1974.78	0.16898056		2504.78	0.07315534		3034.77	0.12237411		3564.77	0.07231874		4094.77	0.21856989
385	0.07077339		914.99	0.03069751		1444.99	0.14825283		1974.98	0.16931868		2504.98	0.07385545		3034.97	0.1219118		3564.97	0.07232031		4094.97	0.21852833
385.2	0.07113801		915.19	0.0307867		1445.19	0.14842252		1975.18	0.16880354		2505.18	0.07389201		3035.17	0.12161992		3565.17	0.07255504		4095.17	0.2176922
385.4	0.07130769		915.39	0.03119531		1445.39	0.14778138		1975.38	0.16874856		2505.38	0.073455		3035.37	0.12183572		3565.37	0.07304352		4095.37	0.21712525
385.6	0.07167829		915.59	0.03134683		1445.59	0.1484728		1975.58	0.16839784		2505.58	0.07325433		3035.57	0.1218666		3565.57	0.07306317		4095.57	0.21753458
385.8	0.07156494		915.79	0.0306103		1445.79	0.14833425		1975.78	0.16877215		2505.78	0.0736694		3035.77	0.12162689		3565.77	0.07327478		4095.77	0.21731305
386	0.07135885		915.99	0.02991792		1445.99	0.14933535		1975.98	0.16932665		2505.98	0.07458951		3035.97	0.12084245		3565.97	0.07359667		4095.97	0.21634044
386.2	0.0698901		916.19	0.03030573		1446.19	0.15023142		1976.18	0.1699903		2506.18	0.07456375		3036.17	0.12084324		3566.17	0.07389591		4096.17	0.21678827
386.4	0.06977278		916.39	0.03106075		1446.39	0.14968621		1976.38	0.17088555		2506.38	0.07395034		3036.37	0.12042681		3566.37	0.07447966		4096.37	0.21668063
386.6	0.06922907		916.59	0.03189982		1446.59	0.15009013		1976.58	0.17190053		2506.58	0.07308607		3036.57	0.12035436		3566.57	0.07480097		4096.57	0.21729708
386.8	0.06968743		916.79	0.03215013		1446.79	0.15029834		1976.78	0.17181103		2506.78	0.07280365		3036.77	0.12013499		3566.77	0.07393771		4096.77	0.2177794
387	0.06956513		916.99	0.03200408		1446.99	0.15073354		1976.98	0.17168814		2506.98	0.07289663		3036.97	0.12026213		3566.97	0.0733169		4096.97	0.21809767
387.2	0.06955165		917.19	0.03158459		1447.19	0.14993542		1977.18	0.1715385		2507.18	0.07278054		3037.17	0.12087089		3567.17	0.07314304		4097.17	0.21773813
387.4	0.0694544		917.39	0.03181517		1447.39	0.15033766		1977.38	0.17261878		2507.38	0.07286903		3037.37	0.12124016		3567.37	0.07283793		4097.37	0.2179837
387.6	0.06818924		917.59	0.03110568		1447.59	0.14916508		1977.58	0.17273237		2507.58	0.07288192		3037.57	0.1218851		3567.57	0.07310515		4097.57	0.21840625
387.8	0.06797724		917.79	0.03003597		1447.79	0.14916076		1977.78	0.17360428		2507.78	0.07296795		3037.77	0.12240416		3567.77	0.07234913		4097.77	0.21880731
388	0.06820443		917.99	0.02976048		1447.99	0.14978616		1977.98	0.17231027		2507.98	0.07388186		3037.97	0.12312249		3567.97	0.07231672		4097.97	0.21903685
388.2	0.06761226		918.19	0.02972042		1448.19	0.14975721		1978.18	0.17160583		2508.18	0.0745883		3038.17	0.12322213		3568.17	0.07186908		4098.17	0.22016434
388.4	0.0670672		918.39	0.03010038		1448.39	0.14993641		1978.38	0.17099395		2508.38	0.0748514		3038.37	0.12340329		3568.37	0.07271939		4098.37	0.21988283
388.6	0.06645483		918.59	0.03011865		1448.59	0.14960245		1978.58	0.17154438		2508.58	0.07562551		3038.57	0.12339609		3568.57	0.07236239		4098.57	0.21941265
388.8	0.06641974		918.79	0.03033164		1448.79	0.1499668		1978.78	0.17114456		2508.78	0.07672434		3038.77	0.1243281		3568.77	0.07271527		4098.77	0.21923034
389	0.06680399		918.99	0.03138926		1448.99	0.15032298		1978.98	0.17177583		2508.98	0.07760018		3038.97	0.12451092		3568.97	0.07204755		4098.97	0.21964725
389.2	0.06692066		919.19	0.03024995		1449.19	0.15108011		1979.18	0.17124409		2509.18	0.07704604		3039.17	0.12502873		3569.17	0.07199979		4099.17	0.21869997
389.4	0.06802319		919.39	0.02956183		1449.39	0.15101481		1979.38	0.17188097		2509.38	0.07700859		3039.37	0.12487654		3569.37	0.07187069		4099.37	0.21786949
389.6	0.06793713		919.59	0.02979937		1449.59	0.15199415		1979.58	0.17144097		2509.58	0.07696533		3039.57	0.12431718		3569.57	0.07281386		4099.57	0.21877415
389.8	0.06828976		919.79	0.03047366		1449.79	0.15230752		1979.78	0.17131525		2509.78	0.07663932		3039.77	0.12362107		3569.77	0.07323653		4099.77	0.21782357
390	0.06854825		919.99	0.03100613		1449.99	0.15301358		1979.98	0.1708439		2509.98	0.07591632		3039.97	0.12334938		3569.97	0.0737009		4099.97	0.21807972
390.2	0.06865066		920.19	0.03140648		1450.19	0.15295512		1980.18	0.17102005		2510.18	0.07493498		3040.17	0.12290586		3570.17	0.07368335		4100.17	0.21757121
390.4	0.0687391		920.39	0.03207687		1450.39	0.15146218		1980.38	0.17102764		2510.38	0.07437806		3040.37	0.12248042		3570.37	0.07499593		4100.37	0.21682837
390.6	0.06896815		920.59	0.03232862		1450.59	0.15173441		1980.58	0.17030875		2510.58	0.07416112		3040.57	0.12255354		3570.57	0.07524754		4100.57	0.21640045
390.8	0.06927319		920.79	0.03208963		1450.79	0.15065568		1980.78	0.16971746		2510.78	0.0740074		3040.77	0.12205937		3570.77	0.07474401		4100.77	0.21561975
391	0.06963261		920.99	0.03146773		1450.99	0.15064593		1980.98	0.16987925		2510.98	0.07407251		3040.97	0.12234092		3570.97	0.07493713		4100.97	0.21542154
391.2	0.06976346		921.19	0.03136068		1451.19	0.14933594		1981.18	0.1702605		2511.18	0.07421273		3041.17	0.12223901		3571.17	0.074413		4101.17	0.2146532
391.4	0.07069415		921.39	0.03101174		1451.39	0.14933303		1981.38	0.1710275		2511.38	0.07407214		3041.37	0.12244819		3571.37	0.07459004		4101.37	0.21509897
391.6	0.07017322		921.59	0.03015134		1451.59	0.14864738		1981.58	0.1710329		2511.58	0.07429315		3041.57	0.12173687		3571.57	0.07411598		4101.57	0.21526891
391.8	0.07038232		921.79	0.02963971		1451.79	0.14892475		1981.78	0.17081928		2511.78	0.0742729		3041.77	0.12152381		3571.77	0.07408605		4101.77	0.21552525
392	0.07127708		921.99	0.03006941		1451.99	0.14819025		1981.98	0.169986		2511.98	0.07468143		3041.97	0.12172867		3571.97	0.07502554		4101.97	0.21597437
392.2	0.07060064		922.19	0.03051001		1452.19	0.1473293		1982.18	0.16991887		2512.18	0.07494501		3042.17	0.12226156		3572.17	0.0746524		4102.17	0.21535951
392.4	0.06920276		922.39	0.03001465		1452.39	0.14899139		1982.38	0.17054688		2512.38	0.07504021		3042.37	0.12234603		3572.37	0.07487166		4102.37	0.21478252
392.6	0.07016803		922.59	0.0304747		1452.59	0.1494592		1982.58	0.17063898		2512.58	0.07599604		3042.57	0.12299669		3572.57	0.07478642		4102.57	0.2154453
392.8	0.06916938		922.79	0.03029252		1452.79	0.15046085		1982.78	0.16999452		2512.78	0.07636903		3042.77	0.1238402		3572.77	0.07395758		4102.77	0.21642913
393	0.06953621		922.99	0.03029857		1452.99	0.15069547		1982.98	0.17079437		2512.98	0.07650341		3042.97	0.12418228		3572.97	0.07286782		4102.97	0.21690447
393.2	0.06951728		923.19	0.02901602		1453.19	0.15106054		1983.18	0.17029656		2513.18	0.07595532		3043.17	0.12491822		3573.17	0.0727513		4103.17	0.21623808
393.4	0.06949184		923.39	0.02897915		1453.39	0.15079758		1983.38	0.1698738		2513.38	0.07642784		3043.37	0.1249257		3573.37	0.07271028		4103.37	0.21664458
393.6	0.06841582		923.59	0.02999603		1453.59	0.15114712		1983.58	0.16953977		2513.58	0.07664337		3043.57	0.12545659		3573.57	0.07370202		4103.57	0.21807369
393.8	0.06816255		923.79	0.03096868		1453.79	0.15169104		1983.78	0.16927956		2513.78	0.07583851		3043.77	0.12525599		3573.77	0.07274061		4103.77	0.21731337
394	0.06773626		923.99	0.03020153		1453.99	0.1511616		1983.98	0.16898959		2513.98	0.07608792		3043.97	0.1255571		3573.97	0.07271207		4103.97	0.217148
394.2	0.06802441		924.19	0.029614		1454.19	0.15073344		1984.18	0.16904844		2514.18	0.07571184		3044.17	0.12558385		3574.17	0.07298749		4104.17	0.21720443
394.4	0.06748602		924.39	0.02923645		1454.39	0.15016687		1984.38	0.16964197		2514.38	0.07557274		3044.37	0.12617028		3574.37	0.07429688		4104.37	0.21694246
394.6	0.06729786		924.59	0.02942794		1454.59	0.14972014		1984.58	0.16944491		2514.58	0.07503286		3044.57	0.12575512		3574.57	0.07421801		4104.57	0.2166967
394.8	0.06683935		924.79	0.02905638		1454.79	0.14876039		1984.78	0.17016069		2514.78	0.07519272		3044.77	0.1250992		3574.77	0.07502336		4104.77	0.21652181
395	0.06693013		924.99	0.02802952		1454.99	0.14891683		1984.98	0.17116507		2514.98	0.07532252		3044.97	0.12554568		3574.97	0.07568424		4104.97	0.21680172
395.2	0.06703014		925.19	0.02848174		1455.19	0.14805934		1985.18	0.17152059		2515.18	0.07536563		3045.17	0.12576598		3575.17	0.07586521		4105.17	0.21680407
395.4	0.06737782		925.39	0.0291191		1455.39	0.14820279		1985.38	0.17250785		2515.38	0.07546839		3045.37	0.12560054		3575.37	0.07659511		4105.37	0.21691586
395.6	0.06622099		925.59	0.02970781		1455.59	0.14766489		1985.58	0.17297894		2515.58	0.07531884		3045.57	0.12533108		3575.57	0.07665638		4105.57	0.21719137
395.8	0.06674639		925.79	0.03011509		1455.79	0.1469143		1985.78	0.17314381		2515.78	0.07519729		3045.77	0.12504642		3575.77	0.07741935		4105.77	0.21620163
396	0.0670786		925.99	0.03087722		1455.99	0.14686355		1985.98	0.17349695		2515.98	0.07564914		3045.97	0.1255851		3575.97	0.07770251		4105.97	0.21617849
396.2	0.06714283		926.19	0.03127704		1456.19	0.14758951		1986.18	0.17357395		2516.18	0.07581892		3046.17	0.12589946		3576.17	0.07733356		4106.17	0.21593827
396.4	0.0670353		926.39	0.03070268		1456.39	0.14952568		1986.38	0.17351588		2516.38	0.07557668		3046.37	0.12585353		3576.37	0.07809835		4106.37	0.21607823
396.6	0.06821212		926.59	0.03074666		1456.59	0.15030848		1986.58	0.17233694		2516.58	0.07541116		3046.57	0.12614206		3576.57	0.0775305		4106.57	0.21635708
396.8	0.06715698		926.79	0.0304844		1456.79	0.15112561		1986.78	0.17199985		2516.78	0.07402098		3046.77	0.12669983		3576.77	0.07682259		4106.77	0.21681594
397	0.06762225		926.99	0.02997885		1456.99	0.15171772		1986.98	0.17186834		2516.98	0.07382121		3046.97	0.12657229		3576.97	0.07645118		4106.97	0.21679785
397.2	0.06691664		927.19	0.02882887		1457.19	0.15209875		1987.18	0.17077098		2517.18	0.07407677		3047.17	0.12656362		3577.17	0.07617594		4107.17	0.21665089
397.4	0.06658729		927.39	0.0284791		1457.39	0.15185125		1987.38	0.171		2517.38	0.07436797		3047.37	0.12628856		3577.37	0.07570533		4107.37	0.21666922
397.6	0.06666348		927.59	0.02827294		1457.59	0.15266243		1987.58	0.17123177		2517.58	0.07428241		3047.57	0.12640524		3577.57	0.0747161		4107.57	0.21671934
397.8	0.0659612		927.79	0.02825787		1457.79	0.15299178		1987.78	0.17016212		2517.78	0.07327171		3047.77	0.1262403		3577.77	0.07346326		4107.77	0.21684771
398	0.06593131		927.99	0.02699067		1457.99	0.1519905		1987.98	0.16963641		2517.98	0.07306076		3047.97	0.12687123		3577.97	0.07278101		4107.97	0.21720957
398.2	0.06621618		928.19	0.02660158		1458.19	0.15226194		1988.18	0.16973015		2518.18	0.07233742		3048.17	0.12658156		3578.17	0.07266014		4108.17	0.2179472
398.4	0.0655858		928.39	0.0265861		1458.39	0.15226755		1988.38	0.17010936		2518.38	0.07218303		3048.37	0.12650469		3578.37	0.07328291		4108.37	0.21743883
398.6	0.06543789		928.59	0.02691584		1458.59	0.15120472		1988.58	0.17010201		2518.58	0.07268689		3048.57	0.1264064		3578.57	0.07372588		4108.57	0.21776973
398.8	0.06498839		928.79	0.0273117		1458.79	0.15157421		1988.78	0.17083541		2518.78	0.07342469		3048.77	0.12630371		3578.77	0.07376669		4108.77	0.21783554
399	0.06552817		928.99	0.02775926		1458.99	0.15192027		1988.98	0.17134574		2518.98	0.0739068		3048.97	0.12724112		3578.97	0.0730671		4108.97	0.21692684
399.2	0.06530194		929.19	0.02905126		1459.19	0.15138263		1989.18	0.17142018		2519.18	0.07430622		3049.17	0.12685323		3579.17	0.07310764		4109.17	0.21688064
399.4	0.06480234		929.39	0.03025472		1459.39	0.1515916		1989.38	0.17184532		2519.38	0.07516292		3049.37	0.12644698		3579.37	0.07366683		4109.37	0.21659036
399.6	0.06478454		929.59	0.03083972		1459.59	0.15061153		1989.58	0.17182696		2519.58	0.07614111		3049.57	0.12686874		3579.57	0.07321544		4109.57	0.21601331
399.8	0.06573074		929.79	0.03129277		1459.79	0.14988353		1989.78	0.17185915		2519.78	0.07688859		3049.77	0.12627138		3579.77	0.07264319		4109.77	0.21547642
400	0.06633339		929.99	0.03206991		1459.99	0.15022122		1989.98	0.17246733		2519.98	0.07797809		3049.97	0.12615621		3579.97	0.07256588		4109.97	0.21504556
400.2	0.06688568		930.19	0.03197272		1460.19	0.15046034		1990.18	0.17262083		2520.18	0.07831144		3050.17	0.12540119		3580.17	0.0723506		4110.17	0.21430692
400.4	0.06699162		930.39	0.03161396		1460.39	0.15065919		1990.38	0.17236576		2520.38	0.07881461		3050.37	0.12470881		3580.37	0.07297063		4110.37	0.21344027
400.6	0.06835619		930.59	0.03210005		1460.59	0.15089189		1990.58	0.17173358		2520.58	0.0784121		3050.57	0.12454059		3580.57	0.07244141		4110.57	0.21377003
400.8	0.06853992		930.79	0.03282209		1460.79	0.15044577		1990.78	0.17274683		2520.78	0.07888472		3050.77	0.12423331		3580.77	0.07223107		4110.77	0.21449245
401	0.06866114		930.99	0.03315143		1460.99	0.14961283		1990.98	0.17306657		2520.98	0.07983777		3050.97	0.12351725		3580.97	0.07287228		4110.97	0.21473433
401.2	0.06783024		931.19	0.03265947		1461.19	0.14907619		1991.18	0.17384828		2521.18	0.07983149		3051.17	0.12301598		3581.17	0.07298546		4111.17	0.2154939
401.4	0.06764798		931.39	0.03181161		1461.39	0.14940765		1991.38	0.17454652		2521.38	0.08025408		3051.37	0.12253817		3581.37	0.0725455		4111.37	0.21612357
401.6	0.06740507		931.59	0.03132441		1461.59	0.14947972		1991.58	0.17426766		2521.58	0.08040635		3051.57	0.12258636		3581.57	0.07297033		4111.57	0.21767741
401.8	0.06735194		931.79	0.03019128		1461.79	0.148568		1991.78	0.17427024		2521.78	0.07934739		3051.77	0.1232451		3581.77	0.07291748		4111.77	0.21843682
402	0.06736052		931.99	0.02857217		1461.99	0.14785142		1991.98	0.17452386		2521.98	0.07880401		3051.97	0.12336857		3581.97	0.07238847		4111.97	0.21901538
402.2	0.06697547		932.19	0.02761408		1462.19	0.14786748		1992.18	0.17522459		2522.18	0.07852501		3052.17	0.12385857		3582.17	0.07237655		4112.17	0.21986222
402.4	0.06633646		932.39	0.02666036		1462.39	0.14757489		1992.38	0.17528298		2522.38	0.0782013		3052.37	0.1236651		3582.37	0.07324771		4112.37	0.22038507
402.6	0.06600446		932.59	0.02564248		1462.59	0.14770088		1992.58	0.1758292		2522.58	0.07795549		3052.57	0.12431154		3582.57	0.07377349		4112.57	0.22073362
402.8	0.06591907		932.79	0.02557325		1462.79	0.14841012		1992.78	0.17636473		2522.78	0.07787685		3052.77	0.12412583		3582.77	0.07332992		4112.77	0.22031067
403	0.06616295		932.99	0.02412479		1462.99	0.1491		1992.98	0.17623608		2522.98	0.0768792		3052.97	0.12480594		3582.97	0.07356135		4112.97	0.21965307
403.2	0.06556658		933.19	0.02402389		1463.19	0.15006545		1993.18	0.17520157		2523.18	0.07592518		3053.17	0.12440817		3583.17	0.07389512		4113.17	0.22025426
403.4	0.06569994		933.39	0.02333388		1463.39	0.15139514		1993.38	0.17467405		2523.38	0.07620194		3053.37	0.12472008		3583.37	0.07348643		4113.37	0.22042608
403.6	0.06645211		933.59	0.02258128		1463.59	0.15082077		1993.58	0.17396727		2523.58	0.07651709		3053.57	0.12506997		3583.57	0.07205048		4113.57	0.22018681
403.8	0.06722794		933.79	0.02382331		1463.79	0.15173972		1993.78	0.17351909		2523.78	0.07669708		3053.77	0.12455222		3583.77	0.07140516		4113.77	0.2206047
404	0.06734277		933.99	0.02444364		1463.99	0.15335083		1993.98	0.17342579		2523.98	0.07680104		3053.97	0.12436375		3583.97	0.07194001		4113.97	0.21992933
404.2	0.06742848		934.19	0.0251182		1464.19	0.1538652		1994.18	0.1722457		2524.18	0.07715186		3054.17	0.12379995		3584.17	0.07157055		4114.17	0.21893829
404.4	0.06891769		934.39	0.02641641		1464.39	0.15430214		1994.38	0.17204194		2524.38	0.07703916		3054.37	0.12370655		3584.37	0.07142223		4114.37	0.21882922
404.6	0.07089084		934.59	0.02849295		1464.59	0.15440662		1994.58	0.17138744		2524.58	0.07690977		3054.57	0.12330768		3584.57	0.07177881		4114.57	0.2191257
404.8	0.07055346		934.79	0.02960796		1464.79	0.15381784		1994.78	0.17222943		2524.78	0.07686087		3054.77	0.12295753		3584.77	0.07180003		4114.77	0.2197483
405	0.07004047		934.99	0.03037402		1464.99	0.15366602		1994.98	0.17251879		2524.98	0.07625282		3054.97	0.12263944		3584.97	0.07281996		4114.97	0.21992737
405.2	0.06984815		935.19	0.02942188		1465.19	0.15393843		1995.18	0.17326144		2525.18	0.07605636		3055.17	0.12239909		3585.17	0.0735174		4115.17	0.22008537
405.4	0.06998159		935.39	0.02987789		1465.39	0.15383145		1995.38	0.17283953		2525.38	0.07650335		3055.37	0.12225423		3585.37	0.07394726		4115.37	0.22031594
405.6	0.06935286		935.59	0.0307014		1465.59	0.15273689		1995.58	0.17311755		2525.58	0.07646319		3055.57	0.12218573		3585.57	0.07427026		4115.57	0.21990667
405.8	0.06931547		935.79	0.03064824		1465.79	0.15128752		1995.78	0.17303214		2525.78	0.07617418		3055.77	0.12304239		3585.77	0.07357414		4115.77	0.2191649
406	0.06794969		935.99	0.03046637		1465.99	0.1495912		1995.98	0.17307415		2525.98	0.07629895		3055.97	0.12249313		3585.97	0.07420003		4115.97	0.21974818
406.2	0.06717767		936.19	0.0303773		1466.19	0.14861961		1996.18	0.17253765		2526.18	0.07696639		3056.17	0.12246644		3586.17	0.07416077		4116.17	0.21967758
406.4	0.0664588		936.39	0.03009843		1466.39	0.14810463		1996.38	0.17308006		2526.38	0.07740854		3056.37	0.12185434		3586.37	0.07456313		4116.37	0.21977544
406.6	0.06577348		936.59	0.02937987		1466.59	0.14846881		1996.58	0.17350331		2526.58	0.07659915		3056.57	0.12236272		3586.57	0.07427803		4116.57	0.21924998
406.8	0.0652036		936.79	0.02892745		1466.79	0.14844091		1996.78	0.17343344		2526.78	0.07605032		3056.77	0.12136154		3586.77	0.07431438		4116.77	0.21878598
407	0.06485702		936.99	0.02849877		1466.99	0.14898133		1996.98	0.17355034		2526.98	0.07496819		3056.97	0.12254345		3586.97	0.07444935		4116.97	0.2187918
407.2	0.06489359		937.19	0.02848789		1467.19	0.149572		1997.18	0.17283669		2527.18	0.07553487		3057.17	0.12247116		3587.17	0.07508338		4117.17	0.21882982
407.4	0.06458305		937.39	0.02864637		1467.39	0.15013615		1997.38	0.17303529		2527.38	0.07558568		3057.37	0.12298619		3587.37	0.07422809		4117.37	0.21854188
407.6	0.06429702		937.59	0.02903647		1467.59	0.14959424		1997.58	0.17325215		2527.58	0.07592051		3057.57	0.12418781		3587.57	0.0742248		4117.57	0.21876576
407.8	0.06387646		937.79	0.02970309		1467.79	0.15102911		1997.78	0.1736593		2527.78	0.07636428		3057.77	0.12486534		3587.77	0.07461008		4117.77	0.21871135
408	0.06325788		937.99	0.02951358		1467.99	0.15132856		1997.98	0.17409051		2527.98	0.0761405		3057.97	0.12551545		3587.97	0.07503518		4117.97	0.21787618
408.2	0.06332448		938.19	0.02977167		1468.19	0.15091773		1998.18	0.17427871		2528.18	0.07672709		3058.17	0.12636412		3588.17	0.0742772		4118.17	0.21730705
408.4	0.06395242		938.39	0.03000204		1468.39	0.15131137		1998.38	0.1749147		2528.38	0.0757624		3058.37	0.12653681		3588.37	0.07385658		4118.37	0.21768024
408.6	0.06426197		938.59	0.02973622		1468.59	0.15114623		1998.58	0.17520957		2528.58	0.07561666		3058.57	0.12646621		3588.57	0.07381177		4118.57	0.21798316
408.8	0.06371407		938.79	0.02923974		1468.79	0.15051418		1998.78	0.17610064		2528.78	0.0743705		3058.77	0.12722793		3588.77	0.07316883		4118.77	0.21831881
409	0.06436208		938.99	0.02898635		1468.99	0.15040809		1998.98	0.17583367		2528.98	0.07455702		3058.97	0.12753874		3588.97	0.07306081		4118.97	0.21813108
409.2	0.06531078		939.19	0.02883709		1469.19	0.15010327		1999.18	0.17480058		2529.18	0.07486793		3059.17	0.12713241		3589.17	0.07338671		4119.17	0.21723954
409.4	0.06490492		939.39	0.02865407		1469.39	0.15016288		1999.38	0.17389521		2529.38	0.07579089		3059.37	0.12662034		3589.37	0.07293196		4119.37	0.21772873
409.6	0.0645279		939.59	0.028234		1469.59	0.14923225		1999.58	0.17369314		2529.58	0.07552913		3059.57	0.12664668		3589.57	0.07289177		4119.57	0.21660112
409.8	0.06491193		939.79	0.02807017		1469.79	0.14833842		1999.78	0.17239056		2529.78	0.07603068		3059.77	0.12692054		3589.77	0.07334885		4119.77	0.21668742
410	0.06492951		939.99	0.02711317		1469.99	0.14711887		1999.98	0.17175852		2529.98	0.0758281		3059.97	0.12565147		3589.97	0.07344063		4119.97	0.21711572
410.2	0.0653698		940.19	0.02690041		1470.19	0.14772295		2000.18	0.17159216		2530.18	0.07619882		3060.17	0.12475492		3590.17	0.07285519		4120.17	0.21674476
410.4	0.06577539		940.39	0.02608924		1470.39	0.14866097		2000.38	0.17156254		2530.38	0.07590722		3060.37	0.12456203		3590.37	0.07292659		4120.37	0.21702661
410.6	0.0660929		940.59	0.02471589		1470.59	0.14876953		2000.58	0.17084935		2530.58	0.07495397		3060.57	0.12393687		3590.57	0.0736385		4120.57	0.21566914
410.8	0.0665827		940.79	0.02424089		1470.79	0.14866999		2000.78	0.17033524		2530.78	0.07459578		3060.77	0.12403888		3590.77	0.07477095		4120.77	0.21458365
411	0.067528		940.99	0.02448832		1470.99	0.14896246		2000.98	0.17026388		2530.98	0.07425069		3060.97	0.12475046		3590.97	0.07564039		4120.97	0.2143047
411.2	0.06735547		941.19	0.02453717		1471.19	0.14912612		2001.18	0.16959584		2531.18	0.07413518		3061.17	0.12435688		3591.17	0.07665025		4121.17	0.21425812
411.4	0.0668298		941.39	0.02500249		1471.39	0.15003361		2001.38	0.17013026		2531.38	0.07471341		3061.37	0.12410736		3591.37	0.07582325		4121.37	0.21387334
411.6	0.06608745		941.59	0.02503577		1471.59	0.14955581		2001.58	0.17023033		2531.58	0.07491646		3061.57	0.1241264		3591.57	0.07688709		4121.57	0.21491251
411.8	0.06588371		941.79	0.02494877		1471.79	0.15018131		2001.78	0.17133359		2531.78	0.07481811		3061.77	0.12354789		3591.77	0.0772456		4121.77	0.21547054
412	0.06564973		941.99	0.02619802		1471.99	0.15055883		2001.98	0.17224741		2531.98	0.07436619		3061.97	0.12394392		3591.97	0.07751004		4121.97	0.21589122
412.2	0.06478823		942.19	0.02668567		1472.19	0.14972342		2002.18	0.17285943		2532.18	0.07430179		3062.17	0.12397456		3592.17	0.0779345		4122.17	0.21693152
412.4	0.06489035		942.39	0.02716787		1472.39	0.15057243		2002.38	0.17337084		2532.38	0.07344984		3062.37	0.12291678		3592.37	0.07716028		4122.37	0.21734995
412.6	0.06517032		942.59	0.02736382		1472.59	0.15069618		2002.58	0.17385471		2532.58	0.07386241		3062.57	0.1225356		3592.57	0.07694876		4122.57	0.21880142
412.8	0.06499991		942.79	0.02828646		1472.79	0.15013004		2002.78	0.17364702		2532.78	0.07394423		3062.77	0.1228881		3592.77	0.07626283		4122.77	0.21875448
413	0.06559497		942.99	0.02907929		1472.99	0.15073523		2002.98	0.1733088		2532.98	0.07391081		3062.97	0.12292276		3592.97	0.07638485		4122.97	0.21875226
413.2	0.06494711		943.19	0.02972584		1473.19	0.1503487		2003.18	0.17241		2533.18	0.0744083		3063.17	0.12253449		3593.17	0.07704963		4123.17	0.21862077
413.4	0.0642003		943.39	0.02990446		1473.39	0.14992397		2003.38	0.17308327		2533.38	0.07473396		3063.37	0.12276037		3593.37	0.07701287		4123.37	0.21879347
413.6	0.06469653		943.59	0.03081614		1473.59	0.14908834		2003.58	0.17381051		2533.58	0.07427859		3063.57	0.12352889		3593.57	0.07767477		4123.57	0.21708818
413.8	0.06472944		943.79	0.03137618		1473.79	0.14864525		2003.78	0.17331396		2533.78	0.0750088		3063.77	0.12351932		3593.77	0.07820222		4123.77	0.21666842
414	0.06506268		943.99	0.0316065		1473.99	0.14805659		2003.98	0.17306258		2533.98	0.07519677		3063.97	0.12384436		3593.97	0.07821649		4123.97	0.21652233
414.2	0.06514944		944.19	0.03143648		1474.19	0.14869689		2004.18	0.17270327		2534.18	0.07580656		3064.17	0.12363763		3594.17	0.07835355		4124.17	0.21521252
414.4	0.0657522		944.39	0.03041855		1474.39	0.14834961		2004.38	0.17135255		2534.38	0.07557373		3064.37	0.12496741		3594.37	0.07809084		4124.37	0.21424425
414.6	0.06606892		944.59	0.02957311		1474.59	0.14778458		2004.58	0.17106472		2534.58	0.07523248		3064.57	0.12514875		3594.57	0.07790426		4124.57	0.2134261
414.8	0.06615918		944.79	0.03010039		1474.79	0.14745728		2004.78	0.17127645		2534.78	0.07470108		3064.77	0.12653464		3594.77	0.07777294		4124.77	0.21300439
415	0.06680068		944.99	0.03026848		1474.99	0.1482427		2004.98	0.17178852		2534.98	0.07411042		3064.97	0.12658523		3594.97	0.07647505		4124.97	0.21286181
415.2	0.06633133		945.19	0.02945366		1475.19	0.14791903		2005.18	0.17167571		2535.18	0.07467685		3065.17	0.12663594		3595.17	0.07555571		4125.17	0.21294569
415.4	0.06642439		945.39	0.02881069		1475.39	0.14796476		2005.38	0.17170947		2535.38	0.07531006		3065.37	0.12653132		3595.37	0.07415555		4125.37	0.21250449
415.6	0.06564389		945.59	0.02811206		1475.59	0.14683791		2005.58	0.17160815		2535.58	0.074679		3065.57	0.12615133		3595.57	0.07381169		4125.57	0.21329022
415.8	0.06584569		945.79	0.02779164		1475.79	0.147685		2005.78	0.17263385		2535.78	0.07485377		3065.77	0.12606535		3595.77	0.07330577		4125.77	0.21406262
416	0.06540689		945.99	0.02781362		1475.99	0.14771468		2005.98	0.17225345		2535.98	0.07495127		3065.97	0.12547645		3595.97	0.0727871		4125.97	0.214457
416.2	0.06517078		946.19	0.02736417		1476.19	0.1476005		2006.18	0.17227067		2536.18	0.07546134		3066.17	0.12490459		3596.17	0.07277185		4126.17	0.21523042
416.4	0.06548859		946.39	0.02760483		1476.39	0.14914563		2006.38	0.17246444		2536.38	0.07504366		3066.37	0.12413046		3596.37	0.07193284		4126.37	0.21601112
416.6	0.06546633		946.59	0.02792347		1476.59	0.14868778		2006.58	0.17241584		2536.58	0.07506003		3066.57	0.12422941		3596.57	0.07207978		4126.57	0.21713622
416.8	0.06539599		946.79	0.02800706		1476.79	0.14842581		2006.78	0.17221147		2536.78	0.07480352		3066.77	0.12425001		3596.77	0.07169132		4126.77	0.21650772
417	0.06530314		946.99	0.0279734		1476.99	0.14789945		2006.98	0.17259016		2536.98	0.07503515		3066.97	0.12387308		3596.97	0.07319175		4126.97	0.21748099
417.2	0.06551921		947.19	0.0273976		1477.19	0.14715608		2007.18	0.1726819		2537.18	0.07605469		3067.17	0.12412253		3597.17	0.07425184		4127.17	0.21817263
417.4	0.0656256		947.39	0.02754409		1477.39	0.14780311		2007.38	0.17332176		2537.38	0.07622229		3067.37	0.12447319		3597.37	0.07489108		4127.37	0.21793729
417.6	0.06622713		947.59	0.02696918		1477.59	0.14731791		2007.58	0.17373758		2537.58	0.07659441		3067.57	0.12518441		3597.57	0.07657055		4127.57	0.21789693
417.8	0.0664504		947.79	0.02749966		1477.79	0.14750694		2007.78	0.17402135		2537.78	0.07751375		3067.77	0.12527615		3597.77	0.07736568		4127.77	0.21799582
418	0.066924		947.99	0.0279009		1477.99	0.14771717		2007.98	0.17419484		2537.98	0.0780327		3067.97	0.12575693		3597.97	0.07784359		4127.97	0.21808666
418.2	0.06717032		948.19	0.02791945		1478.19	0.14781443		2008.18	0.17452961		2538.18	0.07764314		3068.17	0.12522242		3598.17	0.07832707		4128.17	0.21752491
418.4	0.06747144		948.39	0.02881803		1478.39	0.14785153		2008.38	0.17533821		2538.38	0.07662666		3068.37	0.12628677		3598.37	0.07951824		4128.37	0.21763542
418.6	0.06682623		948.59	0.02879158		1478.59	0.14842678		2008.58	0.17615086		2538.58	0.07589205		3068.57	0.12597082		3598.57	0.07996976		4128.57	0.21688971
418.8	0.06689154		948.79	0.02867267		1478.79	0.14893723		2008.78	0.17620411		2538.78	0.07577548		3068.77	0.12669609		3598.77	0.07957675		4128.77	0.21601636
419	0.06734981		948.99	0.02784741		1478.99	0.14950104		2008.98	0.17542984		2538.98	0.07644186		3068.97	0.12601047		3598.97	0.07874254		4128.97	0.21598817
419.2	0.06684715		949.19	0.02716391		1479.19	0.14867721		2009.18	0.17461404		2539.18	0.07619471		3069.17	0.12539659		3599.17	0.07874251		4129.17	0.21638261
419.4	0.06574407		949.39	0.02791103		1479.39	0.14874544		2009.38	0.17400793		2539.38	0.07653503		3069.37	0.12464405		3599.37	0.07846523		4129.37	0.21680801
419.6	0.06502801		949.59	0.02807436		1479.59	0.14866391		2009.58	0.17363656		2539.58	0.07694229		3069.57	0.12439193		3599.57	0.07800655		4129.57	0.2179853
419.8	0.06494455		949.79	0.02947915		1479.79	0.14956883		2009.78	0.17310891		2539.78	0.0765386		3069.77	0.12439285		3599.77	0.07770421		4129.77	0.21897563
420	0.06448112		949.99	0.02994214		1479.99	0.14975597		2009.98	0.17216724		2539.98	0.07658622		3069.97	0.12403737		3599.97	0.07746782		4129.97	0.21818299
420.2	0.06372758		950.19	0.03088508		1480.19	0.15060706		2010.18	0.17209419		2540.18	0.07588009		3070.17	0.1242747		3600.17	0.07729813		4130.17	0.21869256
420.4	0.06400084		950.39	0.03136997		1480.39	0.15101712		2010.38	0.17110803		2540.38	0.07473459		3070.37	0.12407355		3600.37	0.07652973		4130.37	0.21879623
420.6	0.06414362		950.59	0.03195383		1480.59	0.15041352		2010.58	0.17110066		2540.58	0.07418244		3070.57	0.124815		3600.57	0.07628418		4130.57	0.21802787
420.8	0.06426966		950.79	0.03189949		1480.79	0.15008031		2010.78	0.1711469		2540.78	0.07455512		3070.77	0.12406913		3600.77	0.07628392		4130.77	0.21832215
421	0.06424134		950.99	0.03175699		1480.99	0.14949277		2010.98	0.17161711		2540.98	0.07471644		3070.97	0.12404935		3600.97	0.07654894		4130.97	0.21865864
421.2	0.06463862		951.19	0.03149365		1481.19	0.14980632		2011.18	0.17209703		2541.18	0.07444031		3071.17	0.12436557		3601.17	0.07628114		4131.17	0.21868678
421.4	0.06393155		951.39	0.03155011		1481.39	0.14937878		2011.38	0.17234528		2541.38	0.0742779		3071.37	0.124734		3601.37	0.07568579		4131.37	0.218292
421.6	0.06467675		951.59	0.03084926		1481.59	0.14863225		2011.58	0.17337896		2541.58	0.07422413		3071.57	0.12438215		3601.57	0.07555953		4131.57	0.21796202
421.8	0.06515812		951.79	0.03135904		1481.79	0.14896287		2011.78	0.17433376		2541.78	0.07515595		3071.77	0.12459594		3601.77	0.07523789		4131.77	0.21758447
422	0.06583279		951.99	0.03111772		1481.99	0.14867147		2011.98	0.17462781		2541.98	0.07446645		3071.97	0.12444971		3601.97	0.07573421		4131.97	0.21729371
422.2	0.06601427		952.19	0.03042891		1482.19	0.14926763		2012.18	0.17496572		2542.18	0.07478245		3072.17	0.12449834		3602.17	0.07612741		4132.17	0.21738591
422.4	0.06600511		952.39	0.02998995		1482.39	0.15006872		2012.38	0.17476803		2542.38	0.07491902		3072.37	0.12515466		3602.37	0.07723569		4132.37	0.21716885
422.6	0.06614393		952.59	0.02827111		1482.59	0.15142969		2012.58	0.17447363		2542.58	0.07533073		3072.57	0.12603482		3602.57	0.07677844		4132.57	0.21672339
422.8	0.06633489		952.79	0.02738981		1482.79	0.15237716		2012.78	0.17372611		2542.78	0.07608159		3072.77	0.12682067		3602.77	0.07675074		4132.77	0.21744429
423	0.06672182		952.99	0.02687076		1482.99	0.15227716		2012.98	0.17358084		2542.98	0.07680923		3072.97	0.12627832		3602.97	0.07658734		4132.97	0.21789108
423.2	0.06676847		953.19	0.02699731		1483.19	0.15263503		2013.18	0.173917		2543.18	0.07636885		3073.17	0.12655004		3603.17	0.07730995		4133.17	0.21771365
423.4	0.06677079		953.39	0.02723311		1483.39	0.15249529		2013.38	0.17359028		2543.38	0.07709751		3073.37	0.12699829		3603.37	0.07717076		4133.37	0.21802645
423.6	0.06727781		953.59	0.02714584		1483.59	0.15207399		2013.58	0.1729796		2543.58	0.07689399		3073.57	0.12798095		3603.57	0.07642		4133.57	0.21782888
423.8	0.06695291		953.79	0.02733444		1483.79	0.15191271		2013.78	0.17216072		2543.78	0.0767596		3073.77	0.12830615		3603.77	0.07624172		4133.77	0.21776578
424	0.06640116		953.99	0.02666383		1483.99	0.1525094		2013.98	0.17122335		2543.98	0.07708951		3073.97	0.12841572		3603.97	0.07480213		4133.97	0.21697631
424.2	0.06607314		954.19	0.02681504		1484.19	0.15245876		2014.18	0.17083488		2544.18	0.07735454		3074.17	0.12850813		3604.17	0.07460595		4134.17	0.2171228
424.4	0.06608448		954.39	0.02596865		1484.39	0.15223604		2014.38	0.17053852		2544.38	0.07752246		3074.37	0.12758523		3604.37	0.07458799		4134.37	0.21650353
424.6	0.06535225		954.59	0.02660566		1484.59	0.15154563		2014.58	0.17150838		2544.58	0.07761915		3074.57	0.12764577		3604.57	0.07512524		4134.57	0.21640302
424.8	0.06537667		954.79	0.0269643		1484.79	0.15101668		2014.78	0.17203031		2544.78	0.0786269		3074.77	0.12617157		3604.77	0.07585993		4134.77	0.2170156
425	0.06481596		954.99	0.02760413		1484.99	0.1504875		2014.98	0.17197775		2544.98	0.07824826		3074.97	0.12551266		3604.97	0.07573928		4134.97	0.21681906
425.2	0.06460218		955.19	0.02810109		1485.19	0.15030647		2015.18	0.17228522		2545.18	0.07809424		3075.17	0.12499895		3605.17	0.07578293		4135.17	0.21796427
425.4	0.06441282		955.39	0.02891182		1485.39	0.14984754		2015.38	0.1727023		2545.38	0.07852331		3075.37	0.12546618		3605.37	0.07512942		4135.37	0.21878635
425.6	0.0646696		955.59	0.02908486		1485.59	0.14964516		2015.58	0.17344107		2545.58	0.07781377		3075.57	0.12452941		3605.57	0.07514774		4135.57	0.21953661
425.8	0.06518639		955.79	0.02970303		1485.79	0.14955861		2015.78	0.17390186		2545.78	0.07858213		3075.77	0.12485116		3605.77	0.07504508		4135.77	0.21948166
426	0.06570426		955.99	0.03045932		1485.99	0.14963512		2015.98	0.17398959		2545.98	0.07795676		3075.97	0.12444564		3605.97	0.07575811		4135.97	0.21989297
426.2	0.06634436		956.19	0.03079502		1486.19	0.15091033		2016.18	0.17393943		2546.18	0.0781614		3076.17	0.12464942		3606.17	0.07641322		4136.17	0.22058104
426.4	0.06636447		956.39	0.03165317		1486.39	0.15154756		2016.38	0.17369185		2546.38	0.07735124		3076.37	0.12488525		3606.37	0.07732667		4136.37	0.21999451
426.6	0.06684191		956.59	0.03123675		1486.59	0.1525235		2016.58	0.17505608		2546.58	0.07712609		3076.57	0.1265814		3606.57	0.07769705		4136.57	0.21991718
426.8	0.06757714		956.79	0.03118044		1486.79	0.15234252		2016.78	0.17553543		2546.78	0.07691958		3076.77	0.12658147		3606.77	0.0782631		4136.77	0.21957116
427	0.06849212		956.99	0.0309483		1486.99	0.15265867		2016.98	0.17617391		2546.98	0.07618513		3076.97	0.12671099		3606.97	0.07800715		4136.97	0.21949636
427.2	0.06947714		957.19	0.03111492		1487.19	0.15222793		2017.18	0.17626685		2547.18	0.07558219		3077.17	0.12723393		3607.17	0.07902374		4137.17	0.21844146
427.4	0.07006277		957.39	0.03089003		1487.39	0.15177805		2017.38	0.17576496		2547.38	0.07507767		3077.37	0.12734684		3607.37	0.0786818		4137.37	0.21735378
427.6	0.0701441		957.59	0.03022539		1487.59	0.15099014		2017.58	0.17514597		2547.58	0.07529765		3077.57	0.12752688		3607.57	0.07883292		4137.57	0.21653758
427.8	0.07006084		957.79	0.02972296		1487.79	0.15092492		2017.78	0.17471006		2547.78	0.07520377		3077.77	0.12714804		3607.77	0.07921442		4137.77	0.21665754
428	0.06973451		957.99	0.02900271		1487.99	0.15109597		2017.98	0.17456017		2547.98	0.07474703		3077.97	0.12700844		3607.97	0.07948798		4137.97	0.21555621
428.2	0.06903449		958.19	0.02920205		1488.19	0.15027616		2018.18	0.17477006		2548.18	0.07559081		3078.17	0.12676759		3608.17	0.08106655		4138.17	0.21462679
428.4	0.06855589		958.39	0.02852615		1488.39	0.14981533		2018.38	0.17456076		2548.38	0.07549654		3078.37	0.12574736		3608.37	0.08105812		4138.37	0.21490226
428.6	0.06799477		958.59	0.02967263		1488.59	0.14926749		2018.58	0.17457262		2548.58	0.07589561		3078.57	0.12568853		3608.57	0.08073944		4138.57	0.21545504
428.8	0.06740123		958.79	0.02967757		1488.79	0.14885616		2018.78	0.17472411		2548.78	0.0762762		3078.77	0.12506014		3608.77	0.08072732		4138.77	0.21552136
429	0.06703024		958.99	0.03028802		1488.99	0.14815235		2018.98	0.1741321		2548.98	0.07635044		3078.97	0.12490395		3608.97	0.08017076		4138.97	0.2161037
429.2	0.06665392		959.19	0.03015835		1489.19	0.14805027		2019.18	0.17486311		2549.18	0.0760155		3079.17	0.12458073		3609.17	0.07932158		4139.17	0.21693264
429.4	0.06570173		959.39	0.03086543		1489.39	0.14784544		2019.38	0.17542395		2549.38	0.07596631		3079.37	0.12485407		3609.37	0.07870125		4139.37	0.2171988
429.6	0.06466841		959.59	0.03020515		1489.59	0.14705965		2019.58	0.17480915		2549.58	0.0749473		3079.57	0.12407108		3609.57	0.07825902		4139.57	0.21722761
429.8	0.06422612		959.79	0.03019134		1489.79	0.14800475		2019.78	0.17473077		2549.78	0.0757558		3079.77	0.12378669		3609.77	0.07714458		4139.77	0.21697341
430	0.06391212		959.99	0.03003616		1489.99	0.14839157		2019.98	0.17415759		2549.98	0.07504827		3079.97	0.12338779		3609.97	0.07640684		4139.97	0.21654261
430.2	0.0640179		960.19	0.03009447		1490.19	0.14870556		2020.18	0.17327838		2550.18	0.07472223		3080.17	0.12329667		3610.17	0.07546815		4140.17	0.21620982
430.4	0.06324878		960.39	0.03027368		1490.39	0.14933951		2020.38	0.17298803		2550.38	0.07449276		3080.37	0.12317422		3610.37	0.07514683		4140.37	0.21603979
430.6	0.06346992		960.59	0.0290737		1490.59	0.15010824		2020.58	0.17438795		2550.58	0.07471998		3080.57	0.12405545		3610.57	0.0754706		4140.57	0.21652331
430.8	0.06366848		960.79	0.02896888		1490.79	0.15023174		2020.78	0.17377905		2550.78	0.074412		3080.77	0.1238559		3610.77	0.07519464		4140.77	0.21682838
431	0.06283044		960.99	0.02853155		1490.99	0.15070391		2020.98	0.17350715		2550.98	0.07361982		3080.97	0.12471873		3610.97	0.07533104		4140.97	0.21726647
431.2	0.06289566		961.19	0.02827885		1491.19	0.15022447		2021.18	0.17340388		2551.18	0.07390242		3081.17	0.1249142		3611.17	0.0757824		4141.17	0.2170502
431.4	0.06281563		961.39	0.02799671		1491.39	0.15064618		2021.38	0.17359123		2551.38	0.07474986		3081.37	0.12487661		3611.37	0.07522701		4141.37	0.21652792
431.6	0.06296237		961.59	0.02800679		1491.59	0.15058435		2021.58	0.1725188		2551.58	0.07563646		3081.57	0.12461434		3611.57	0.07568601		4141.57	0.21684573
431.8	0.06342133		961.79	0.02847783		1491.79	0.15013009		2021.78	0.17190407		2551.78	0.07441649		3081.77	0.12426208		3611.77	0.07554686		4141.77	0.21712445
432	0.06334299		961.99	0.02824282		1491.99	0.15021807		2021.98	0.1716381		2551.98	0.07515227		3081.97	0.12458915		3611.97	0.07621626		4141.97	0.21701357
432.2	0.06359731		962.19	0.02878355		1492.19	0.14950384		2022.18	0.17138796		2552.18	0.07649886		3082.17	0.12491245		3612.17	0.07505786		4142.17	0.21705082
432.4	0.06409693		962.39	0.02787295		1492.39	0.14885843		2022.38	0.17103764		2552.38	0.07615035		3082.37	0.12447011		3612.37	0.07389874		4142.37	0.21829931
432.6	0.06388137		962.59	0.02801753		1492.59	0.14926098		2022.58	0.17163841		2552.58	0.07637409		3082.57	0.12459605		3612.57	0.07413161		4142.57	0.21827951
432.8	0.06434631		962.79	0.02722831		1492.79	0.14980395		2022.78	0.17138743		2552.78	0.07647758		3082.77	0.12503073		3612.77	0.07446403		4142.77	0.21783487
433	0.06487278		962.99	0.02673834		1492.99	0.14901786		2022.98	0.1711213		2552.98	0.07641244		3082.97	0.12496618		3612.97	0.07492785		4142.97	0.2183142
433.2	0.06543192		963.19	0.02501029		1493.19	0.14941573		2023.18	0.17222587		2553.18	0.07638017		3083.17	0.12430523		3613.17	0.07521708		4143.17	0.21786855
433.4	0.06478275		963.39	0.02465562		1493.39	0.14969703		2023.38	0.17285741		2553.38	0.07599481		3083.37	0.12348686		3613.37	0.07548542		4143.37	0.21771561
433.6	0.06480551		963.59	0.02285092		1493.59	0.14956385		2023.58	0.17241844		2553.58	0.07631902		3083.57	0.12373219		3613.57	0.07551565		4143.57	0.21770965
433.8	0.0648184		963.79	0.02222194		1493.79	0.14977919		2023.78	0.17258091		2553.78	0.0764846		3083.77	0.12317979		3613.77	0.07561161		4143.77	0.21746675
434	0.06532758		963.99	0.022147		1493.99	0.14972938		2023.98	0.17189024		2553.98	0.07572831		3083.97	0.12228153		3613.97	0.07602495		4143.97	0.21658363
434.2	0.06545536		964.19	0.02274299		1494.19	0.14961351		2024.18	0.17212818		2554.18	0.07525906		3084.17	0.12205228		3614.17	0.07652899		4144.17	0.2160745
434.4	0.06477009		964.39	0.02201756		1494.39	0.14974098		2024.38	0.17275592		2554.38	0.07436348		3084.37	0.12267821		3614.37	0.07746625		4144.37	0.21674381
434.6	0.06389832		964.59	0.02147168		1494.59	0.14909296		2024.58	0.17273247		2554.58	0.07456113		3084.57	0.12348323		3614.57	0.07834764		4144.57	0.21638674
434.8	0.06235503		964.79	0.02230537		1494.79	0.14823482		2024.78	0.17188373		2554.78	0.07412362		3084.77	0.12317893		3614.77	0.07808011		4144.77	0.21618707
435	0.06101753		964.99	0.02207335		1494.99	0.14787269		2024.98	0.17197452		2554.98	0.07393538		3084.97	0.12385566		3614.97	0.07748635		4144.97	0.21649084
435.2	0.06025597		965.19	0.02273174		1495.19	0.14723501		2025.18	0.17146391		2555.18	0.07451272		3085.17	0.12314206		3615.17	0.0763644		4145.17	0.21639959
435.4	0.06056698		965.39	0.02415135		1495.39	0.14712478		2025.38	0.17164877		2555.38	0.07556191		3085.37	0.12332247		3615.37	0.07542282		4145.37	0.21574503
435.6	0.06109893		965.59	0.0257307		1495.59	0.14688915		2025.58	0.17075127		2555.58	0.07544109		3085.57	0.12386231		3615.57	0.0754632		4145.57	0.21683573
435.8	0.06129921		965.79	0.02643299		1495.79	0.14616865		2025.78	0.17102783		2555.78	0.07472221		3085.77	0.12485029		3615.77	0.07493511		4145.77	0.21646064
436	0.06135814		965.99	0.02662053		1495.99	0.14688246		2025.98	0.17158335		2555.98	0.07551629		3085.97	0.12487637		3615.97	0.07526955		4145.97	0.21628457
436.2	0.06186193		966.19	0.02792451		1496.19	0.14654432		2026.18	0.17177863		2556.18	0.07534334		3086.17	0.12564678		3616.17	0.07391068		4146.17	0.21611721
436.4	0.06214641		966.39	0.0283211		1496.39	0.14717481		2026.38	0.17227203		2556.38	0.07513334		3086.37	0.12594807		3616.37	0.07428373		4146.37	0.21640584
436.6	0.06267343		966.59	0.02843031		1496.59	0.14825541		2026.58	0.17273024		2556.58	0.07518315		3086.57	0.12729945		3616.57	0.07462679		4146.57	0.21605095
436.8	0.06331951		966.79	0.02767395		1496.79	0.14826025		2026.78	0.17233017		2556.78	0.07490602		3086.77	0.12777147		3616.77	0.07508877		4146.77	0.21542196
437	0.06305751		966.99	0.02705679		1496.99	0.14737574		2026.98	0.17345992		2556.98	0.07449363		3086.97	0.12798279		3616.97	0.07528086		4146.97	0.21575358
437.2	0.06357165		967.19	0.02548501		1497.19	0.14790733		2027.18	0.17362993		2557.18	0.07483149		3087.17	0.12766316		3617.17	0.07542653		4147.17	0.21565613
437.4	0.06280955		967.39	0.02511035		1497.39	0.14760395		2027.38	0.17399042		2557.38	0.07462266		3087.37	0.12777989		3617.37	0.07549283		4147.37	0.21552038
437.6	0.0634118		967.59	0.02467215		1497.59	0.14734438		2027.58	0.17347852		2557.58	0.07529684		3087.57	0.12932777		3617.57	0.07576175		4147.57	0.21502187
437.8	0.0640471		967.79	0.02465053		1497.79	0.14671267		2027.78	0.1731409		2557.78	0.07430466		3087.77	0.12851618		3617.77	0.07613379		4147.77	0.21529515
438	0.0642115		967.99	0.02389391		1497.99	0.14637868		2027.98	0.17303737		2557.98	0.07374578		3087.97	0.12832075		3617.97	0.07627496		4147.97	0.21458988
438.2	0.06346387		968.19	0.02319266		1498.19	0.14601759		2028.18	0.17405774		2558.18	0.07343387		3088.17	0.12879761		3618.17	0.07542757		4148.17	0.21444469
438.4	0.06283919		968.39	0.02372185		1498.39	0.14626512		2028.38	0.17416867		2558.38	0.07338828		3088.37	0.12880393		3618.37	0.07576437		4148.37	0.21506412
438.6	0.06166136		968.59	0.02445605		1498.59	0.14604684		2028.58	0.1734051		2558.58	0.07356791		3088.57	0.12799622		3618.57	0.0753518		4148.57	0.21496559
438.8	0.06138421		968.79	0.02480882		1498.79	0.14642074		2028.78	0.17374331		2558.78	0.07270624		3088.77	0.12659179		3618.77	0.0743748		4148.77	0.21481056
439	0.06175627		968.99	0.02519204		1498.99	0.14679743		2028.98	0.17401897		2558.98	0.07261093		3088.97	0.12584603		3618.97	0.07406969		4148.97	0.21530723
439.2	0.06114555		969.19	0.02619322		1499.19	0.14713631		2029.18	0.1740758		2559.18	0.0726669		3089.17	0.12461251		3619.17	0.07339955		4149.17	0.21491799
439.4	0.06245202		969.39	0.02717051		1499.39	0.14733127		2029.38	0.17531794		2559.38	0.07349499		3089.37	0.12494771		3619.37	0.07341689		4149.37	0.21534217
439.6	0.06276883		969.59	0.02759555		1499.59	0.14744651		2029.58	0.17565332		2559.58	0.07314361		3089.57	0.12515523		3619.57	0.07415656		4149.57	0.21624719
439.8	0.06330945		969.79	0.02782879		1499.79	0.14750479		2029.78	0.17536498		2559.78	0.0733956		3089.77	0.12374813		3619.77	0.07328909		4149.77	0.21561532
440	0.06340298		969.99	0.02835419		1499.99	0.14788138		2029.98	0.1754116		2559.98	0.07317144		3089.97	0.12347832		3619.97	0.07381749		4149.97	0.21593766
440.2	0.06362864		970.19	0.0291031		1500.19	0.14751403		2030.18	0.17501353		2560.18	0.07292898		3090.17	0.12362175		3620.17	0.074022		4150.17	0.21693421
440.4	0.063401		970.39	0.02829186		1500.39	0.1481888		2030.38	0.17453423		2560.38	0.07287736		3090.37	0.12394774		3620.37	0.07506763		4150.37	0.21722214
440.6	0.06356435		970.59	0.02678173		1500.59	0.14804978		2030.58	0.17387919		2560.58	0.0726955		3090.57	0.12399215		3620.57	0.07530054		4150.57	0.217225
440.8	0.06256666		970.79	0.02632488		1500.79	0.14775362		2030.78	0.17368459		2560.78	0.0729644		3090.77	0.12393353		3620.77	0.0758228		4150.77	0.21714467
441	0.06200017		970.99	0.02625382		1500.99	0.14708912		2030.98	0.17399613		2560.98	0.07333143		3090.97	0.12444285		3620.97	0.07527693		4150.97	0.21765792
441.2	0.06254675		971.19	0.02544774		1501.19	0.14703903		2031.18	0.17326865		2561.18	0.0741759		3091.17	0.12416401		3621.17	0.07588195		4151.17	0.21701094
441.4	0.06251591		971.39	0.02513421		1501.39	0.14654633		2031.38	0.17318483		2561.38	0.07469871		3091.37	0.12513691		3621.37	0.0758731		4151.37	0.21595658
441.6	0.0630983		971.59	0.02470008		1501.59	0.14622572		2031.58	0.17305137		2561.58	0.07509464		3091.57	0.12602661		3621.57	0.07608843		4151.57	0.21622002
441.8	0.06321962		971.79	0.02477766		1501.79	0.14575751		2031.78	0.1723802		2561.78	0.07478408		3091.77	0.12594235		3621.77	0.07664223		4151.77	0.21623612
442	0.06254282		971.99	0.02416345		1501.99	0.14572548		2031.98	0.17281075		2561.98	0.07501526		3091.97	0.1261648		3621.97	0.0765019		4151.97	0.21530395
442.2	0.06252285		972.19	0.0245487		1502.19	0.14583901		2032.18	0.17351076		2562.18	0.07504171		3092.17	0.12613146		3622.17	0.07581814		4152.17	0.21609116
442.4	0.06221872		972.39	0.0249452		1502.39	0.14596886		2032.38	0.17346288		2562.38	0.07545864		3092.37	0.12539192		3622.37	0.07685349		4152.37	0.21555573
442.6	0.06140009		972.59	0.02508313		1502.59	0.14584205		2032.58	0.1734671		2562.58	0.07505616		3092.57	0.1252464		3622.57	0.07725427		4152.57	0.21595455
442.8	0.06098127		972.79	0.02542224		1502.79	0.14623895		2032.78	0.1740649		2562.78	0.07438516		3092.77	0.12533828		3622.77	0.07789995		4152.77	0.21519169
443	0.06077844		972.99	0.02652764		1502.99	0.14583225		2032.98	0.1738947		2562.98	0.07476797		3092.97	0.12544625		3622.97	0.07847451		4152.97	0.21484231
443.2	0.06037938		973.19	0.02674108		1503.19	0.14553153		2033.18	0.17334533		2563.18	0.07531851		3093.17	0.12534482		3623.17	0.07822675		4153.17	0.21511072
443.4	0.06104488		973.39	0.02674412		1503.39	0.14571798		2033.38	0.17372247		2563.38	0.07546811		3093.37	0.12556899		3623.37	0.07822831		4153.37	0.21547169
443.6	0.06020459		973.59	0.02674415		1503.59	0.14682332		2033.58	0.17319509		2563.58	0.07489396		3093.57	0.12546576		3623.57	0.07826491		4153.57	0.21596321
443.8	0.0607448		973.79	0.02708208		1503.79	0.14695555		2033.78	0.17170481		2563.78	0.07440492		3093.77	0.12535138		3623.77	0.07817158		4153.77	0.2165939
444	0.06018412		973.99	0.02692651		1503.99	0.14695409		2033.98	0.17134625		2563.98	0.07316585		3093.97	0.12620183		3623.97	0.07911345		4153.97	0.21720326
444.2	0.06039707		974.19	0.02584994		1504.19	0.14657212		2034.18	0.17040398		2564.18	0.07318416		3094.17	0.12550623		3624.17	0.07865759		4154.17	0.21741532
444.4	0.05995268		974.39	0.02565085		1504.39	0.14716337		2034.38	0.17014065		2564.38	0.07318759		3094.37	0.12566462		3624.37	0.077826		4154.37	0.21675151
444.6	0.06033613		974.59	0.02534815		1504.59	0.14763396		2034.58	0.17035398		2564.58	0.07459103		3094.57	0.12520517		3624.57	0.07765663		4154.57	0.21642103
444.8	0.06064693		974.79	0.0256374		1504.79	0.14802815		2034.78	0.17080488		2564.78	0.0752661		3094.77	0.12516742		3624.77	0.0775228		4154.77	0.21611345
445	0.06174355		974.99	0.02577199		1504.99	0.14794252		2034.98	0.17170714		2564.98	0.07541069		3094.97	0.12445637		3624.97	0.07697808		4154.97	0.21662978
445.2	0.06237428		975.19	0.02559446		1505.19	0.1480126		2035.18	0.17165482		2565.18	0.07603716		3095.17	0.12389738		3625.17	0.07741664		4155.17	0.21608391
445.4	0.06298212		975.39	0.02442567		1505.39	0.14780901		2035.38	0.1722791		2565.38	0.07624105		3095.37	0.12428551		3625.37	0.07652529		4155.37	0.21563078
445.6	0.06382742		975.59	0.02348005		1505.59	0.14774668		2035.58	0.17233638		2565.58	0.07670799		3095.57	0.12442207		3625.57	0.07583318		4155.57	0.21624035
445.8	0.06360191		975.79	0.02351984		1505.79	0.14809		2035.78	0.17264083		2565.78	0.07675789		3095.77	0.12329535		3625.77	0.07588504		4155.77	0.21611148
446	0.06367311		975.99	0.02296047		1505.99	0.14810723		2035.98	0.17427894		2565.98	0.07755244		3095.97	0.12293965		3625.97	0.07538944		4155.97	0.21630033
446.2	0.06396129		976.19	0.02275345		1506.19	0.14824177		2036.18	0.17483848		2566.18	0.07788264		3096.17	0.12264677		3626.17	0.0752569		4156.17	0.21713711
446.4	0.0635108		976.39	0.02268219		1506.39	0.1492957		2036.38	0.17555473		2566.38	0.07880556		3096.37	0.12129544		3626.37	0.07558341		4156.37	0.21635975
446.6	0.06302503		976.59	0.02323175		1506.59	0.14985498		2036.58	0.17619998		2566.58	0.07869677		3096.57	0.12171345		3626.57	0.07563058		4156.57	0.21646804
446.8	0.0630897		976.79	0.02270157		1506.79	0.15017064		2036.78	0.17593685		2566.78	0.07837495		3096.77	0.12163428		3626.77	0.07602021		4156.77	0.21597907
447	0.0637106		976.99	0.02317218		1506.99	0.14984734		2036.98	0.17567122		2566.98	0.07842062		3096.97	0.12057033		3626.97	0.07578274		4156.97	0.21556545
447.2	0.06295896		977.19	0.02311144		1507.19	0.15000605		2037.18	0.17562385		2567.18	0.07869029		3097.17	0.11992984		3627.17	0.0755004		4157.17	0.21659502
447.4	0.06239419		977.39	0.02306795		1507.39	0.15099661		2037.38	0.17562772		2567.38	0.07785175		3097.37	0.11980308		3627.37	0.07531868		4157.37	0.21542604
447.6	0.06160248		977.59	0.02316925		1507.59	0.15128096		2037.58	0.17418278		2567.58	0.07685553		3097.57	0.1203607		3627.57	0.07565889		4157.57	0.21585597
447.8	0.06147928		977.79	0.02306902		1507.79	0.15021585		2037.78	0.17376664		2567.78	0.0762202		3097.77	0.12098984		3627.77	0.0758953		4157.77	0.21560278
448	0.0608269		977.99	0.02287581		1507.99	0.14948483		2037.98	0.17384573		2567.98	0.0758413		3097.97	0.12153986		3627.97	0.07503816		4157.97	0.21483414
448.2	0.06087806		978.19	0.02237504		1508.19	0.14879629		2038.18	0.17332451		2568.18	0.07558098		3098.17	0.12235403		3628.17	0.07489972		4158.17	0.21412968
448.4	0.06091033		978.39	0.02343286		1508.39	0.1485231		2038.38	0.17327257		2568.38	0.07539781		3098.37	0.12373872		3628.37	0.07447566		4158.37	0.21378125
448.6	0.06129627		978.59	0.02355737		1508.59	0.14786695		2038.58	0.1733287		2568.58	0.07620674		3098.57	0.12432344		3628.57	0.07480833		4158.57	0.21340496
448.8	0.06177234		978.79	0.0231925		1508.79	0.14654787		2038.78	0.17367511		2568.78	0.07552875		3098.77	0.12490921		3628.77	0.07438402		4158.77	0.21309137
449	0.0618219		978.99	0.0233452		1508.99	0.14580684		2038.98	0.17434136		2568.98	0.07491986		3098.97	0.12524801		3628.97	0.07402227		4158.97	0.21395496
449.2	0.06215613		979.19	0.02361167		1509.19	0.14539119		2039.18	0.17410717		2569.18	0.07502232		3099.17	0.12604827		3629.17	0.07436071		4159.17	0.21369769
449.4	0.06325677		979.39	0.02282716		1509.39	0.1458819		2039.38	0.17453552		2569.38	0.07473388		3099.37	0.12635869		3629.37	0.07395498		4159.37	0.21434816
449.6	0.06352054		979.59	0.02228824		1509.59	0.14575771		2039.58	0.17400126		2569.58	0.07509062		3099.57	0.12674306		3629.57	0.07318913		4159.57	0.21464184
449.8	0.06334801		979.79	0.02335416		1509.79	0.14615498		2039.78	0.17495537		2569.78	0.07644418		3099.77	0.12688536		3629.77	0.07363503		4159.77	0.21518516
450	0.06432893		979.99	0.02373645		1509.99	0.14613848		2039.98	0.17493054		2569.98	0.07721176		3099.97	0.12709661		3629.97	0.07285033		4159.97	0.21605254
450.2	0.064453		980.19	0.02334029		1510.19	0.14737596		2040.18	0.17476223		2570.18	0.07739382		3100.17	0.12652744		3630.17	0.07259949		4160.17	0.21603882
450.4	0.06437366		980.39	0.02300332		1510.39	0.14820146		2040.38	0.1749827		2570.38	0.07766363		3100.37	0.1266132		3630.37	0.07220025		4160.37	0.21544158
450.6	0.06441179		980.59	0.02262812		1510.59	0.14764357		2040.58	0.17478095		2570.58	0.07735232		3100.57	0.12652775		3630.57	0.07235281		4160.57	0.21536088
450.8	0.06462881		980.79	0.02214629		1510.79	0.14851726		2040.78	0.17419866		2570.78	0.07759137		3100.77	0.12570196		3630.77	0.07233631		4160.77	0.21533727
451	0.06381789		980.99	0.02246756		1510.99	0.14827579		2040.98	0.17481527		2570.98	0.07771093		3100.97	0.12555087		3630.97	0.07184648		4160.97	0.21508201
451.2	0.06286223		981.19	0.0225786		1511.19	0.14884904		2041.18	0.17392522		2571.18	0.0776511		3101.17	0.12576785		3631.17	0.07123357		4161.17	0.21495033
451.4	0.06300082		981.39	0.02230204		1511.39	0.14893943		2041.38	0.17310446		2571.38	0.07795307		3101.37	0.12614657		3631.37	0.07199955		4161.37	0.21431987
451.6	0.06197371		981.59	0.02248699		1511.59	0.14803335		2041.58	0.17236489		2571.58	0.07753779		3101.57	0.12694042		3631.57	0.07272401		4161.57	0.214662
451.8	0.06152161		981.79	0.02212296		1511.79	0.1467218		2041.78	0.17234311		2571.78	0.07716101		3101.77	0.12747967		3631.77	0.07306725		4161.77	0.21407292
452	0.06153172		981.99	0.02183032		1511.99	0.14617615		2041.98	0.17177642		2571.98	0.0769067		3101.97	0.12809259		3631.97	0.07340399		4161.97	0.21425199
452.2	0.06193147		982.19	0.02207587		1512.19	0.14543072		2042.18	0.17135367		2572.18	0.07527931		3102.17	0.12818414		3632.17	0.07438845		4162.17	0.21546849
452.4	0.06180107		982.39	0.02236577		1512.39	0.14488662		2042.38	0.17121912		2572.38	0.07509721		3102.37	0.12795546		3632.37	0.07447683		4162.37	0.21592285
452.6	0.06105116		982.59	0.02232438		1512.59	0.14418973		2042.58	0.17117224		2572.58	0.07384702		3102.57	0.12781805		3632.57	0.07499337		4162.57	0.21564938
452.8	0.06083892		982.79	0.02214498		1512.79	0.14334579		2042.78	0.17051366		2572.78	0.07267938		3102.77	0.12776178		3632.77	0.07536207		4162.77	0.21620663
453	0.06029356		982.99	0.02306591		1512.99	0.14420733		2042.98	0.17064875		2572.98	0.07128427		3102.97	0.12707047		3632.97	0.07571006		4162.97	0.21717248
453.2	0.06067962		983.19	0.02385956		1513.19	0.1446627		2043.18	0.17036166		2573.18	0.07046094		3103.17	0.12600914		3633.17	0.07584868		4163.17	0.2177831
453.4	0.06148943		983.39	0.02351662		1513.39	0.14483483		2043.38	0.17029766		2573.38	0.07068081		3103.37	0.12484019		3633.37	0.07594772		4163.37	0.21767612
453.6	0.0616707		983.59	0.02379166		1513.59	0.14445936		2043.58	0.1703769		2573.58	0.07103899		3103.57	0.1244098		3633.57	0.07621773		4163.57	0.2173627
453.8	0.06218696		983.79	0.02441821		1513.79	0.14537453		2043.78	0.17036206		2573.78	0.07195976		3103.77	0.12390704		3633.77	0.07655956		4163.77	0.21777316
454	0.06273395		983.99	0.02377406		1513.99	0.14602924		2043.98	0.17010348		2573.98	0.07126439		3103.97	0.12304004		3633.97	0.07677613		4163.97	0.21788795
454.2	0.06192411		984.19	0.02409655		1514.19	0.14660019		2044.18	0.17027579		2574.18	0.07137519		3104.17	0.12271945		3634.17	0.07729504		4164.17	0.21753156
454.4	0.06204708		984.39	0.02403864		1514.39	0.14706796		2044.38	0.17064524		2574.38	0.07121983		3104.37	0.1232674		3634.37	0.07774898		4164.37	0.21815401
454.6	0.06244186		984.59	0.02356428		1514.59	0.14662908		2044.58	0.17058495		2574.58	0.07171619		3104.57	0.12236421		3634.57	0.07762958		4164.57	0.2173051
454.8	0.061837		984.79	0.02333434		1514.79	0.14827421		2044.78	0.17074173		2574.78	0.07265409		3104.77	0.12316968		3634.77	0.07671009		4164.77	0.21670974
455	0.06196949		984.99	0.02366831		1514.99	0.14807858		2044.98	0.1714993		2574.98	0.07312108		3104.97	0.12412875		3634.97	0.0759277		4164.97	0.21666169
455.2	0.06235313		985.19	0.02388943		1515.19	0.14822954		2045.18	0.1708343		2575.18	0.073691		3105.17	0.1244516		3635.17	0.07536976		4165.17	0.21594799
455.4	0.06196643		985.39	0.02376269		1515.39	0.14709915		2045.38	0.17055867		2575.38	0.07463941		3105.37	0.1249649		3635.37	0.07601392		4165.37	0.21587975
455.6	0.0612323		985.59	0.0245868		1515.59	0.14580102		2045.58	0.17020748		2575.58	0.0739877		3105.57	0.12542587		3635.57	0.07581194		4165.57	0.21561581
455.8	0.06163963		985.79	0.02347564		1515.79	0.14495461		2045.78	0.16999328		2575.78	0.07368252		3105.77	0.12629101		3635.77	0.07544186		4165.77	0.21635899
456	0.0623675		985.99	0.02273873		1515.99	0.14585263		2045.98	0.16988854		2575.98	0.07393258		3105.97	0.126961		3635.97	0.07460846		4165.97	0.21682391
456.2	0.06154598		986.19	0.02289035		1516.19	0.14508338		2046.18	0.17043112		2576.18	0.07316931		3106.17	0.12780062		3636.17	0.07515727		4166.17	0.21722979
456.4	0.06086606		986.39	0.02238993		1516.39	0.14516631		2046.38	0.16982692		2576.38	0.07289506		3106.37	0.12753091		3636.37	0.07437953		4166.37	0.21734935
456.6	0.06044835		986.59	0.02209198		1516.59	0.14564177		2046.58	0.16976015		2576.58	0.07217969		3106.57	0.1274155		3636.57	0.07354831		4166.57	0.21755953
456.8	0.06067334		986.79	0.02226785		1516.79	0.14526335		2046.78	0.17051725		2576.78	0.0722671		3106.77	0.12716044		3636.77	0.07244972		4166.77	0.21732339
457	0.06096009		986.99	0.02214862		1516.99	0.1459957		2046.98	0.17088491		2576.98	0.07169061		3106.97	0.12575732		3636.97	0.07206192		4166.97	0.21723343
457.2	0.06100563		987.19	0.02234209		1517.19	0.14651985		2047.18	0.17187701		2577.18	0.07160891		3107.17	0.12554989		3637.17	0.07226877		4167.17	0.21639825
457.4	0.0620237		987.39	0.02187314		1517.39	0.14685878		2047.38	0.17268022		2577.38	0.07290745		3107.37	0.12497854		3637.37	0.07270222		4167.37	0.21529068
457.6	0.06276353		987.59	0.02222749		1517.59	0.14771932		2047.58	0.17342855		2577.58	0.07294108		3107.57	0.12428941		3637.57	0.07250395		4167.57	0.21508445
457.8	0.062897		987.79	0.02164888		1517.79	0.14814191		2047.78	0.17267807		2577.78	0.0735035		3107.77	0.12378541		3637.77	0.07219315		4167.77	0.21494243
458	0.06247226		987.99	0.02197173		1517.99	0.14758421		2047.98	0.17249594		2577.98	0.07368737		3107.97	0.12319117		3637.97	0.07294618		4167.97	0.2147687
458.2	0.06172789		988.19	0.02181558		1518.19	0.14755005		2048.18	0.17212739		2578.18	0.07453056		3108.17	0.12233301		3638.17	0.07282514		4168.17	0.21474631
458.4	0.06165993		988.39	0.02210288		1518.39	0.14753325		2048.38	0.17174177		2578.38	0.07546017		3108.37	0.12186627		3638.37	0.07290565		4168.37	0.21458828
458.6	0.06125498		988.59	0.02239154		1518.59	0.14685036		2048.58	0.17093488		2578.58	0.07661086		3108.57	0.12223149		3638.57	0.07296589		4168.57	0.2132625
458.8	0.06139352		988.79	0.02318536		1518.79	0.14742292		2048.78	0.17011411		2578.78	0.07689727		3108.77	0.12278956		3638.77	0.07245867		4168.77	0.21300364
459	0.06188675		988.99	0.02345781		1518.99	0.14651472		2048.98	0.17064901		2578.98	0.07644376		3108.97	0.12264394		3638.97	0.07321216		4168.97	0.21264836
459.2	0.06182672		989.19	0.0238067		1519.19	0.14626934		2049.18	0.16981858		2579.18	0.0769769		3109.17	0.12245775		3639.17	0.07370636		4169.17	0.21226934
459.4	0.06167733		989.39	0.02380333		1519.39	0.14614577		2049.38	0.1696134		2579.38	0.07632697		3109.37	0.12291958		3639.37	0.07426019		4169.37	0.21196011
459.6	0.06233277		989.59	0.02368125		1519.59	0.14560945		2049.58	0.17070799		2579.58	0.07562472		3109.57	0.12372959		3639.57	0.07479608		4169.57	0.21241714
459.8	0.06240522		989.79	0.02309661		1519.79	0.14553725		2049.78	0.17097394		2579.78	0.07549109		3109.77	0.12507858		3639.77	0.07487581		4169.77	0.2128301
460	0.06225928		989.99	0.02330045		1519.99	0.14673648		2049.98	0.17143033		2579.98	0.07544977		3109.97	0.12525232		3639.97	0.07511881		4169.97	0.2129773
460.2	0.06159367		990.19	0.02464015		1520.19	0.14591671		2050.18	0.17230984		2580.18	0.0745493		3110.17	0.12600176		3640.17	0.07629041		4170.17	0.21332445
460.4	0.06188591		990.39	0.02492702		1520.39	0.14654408		2050.38	0.17269345		2580.38	0.07410754		3110.37	0.12542481		3640.37	0.07590355		4170.37	0.21373514
460.6	0.06246242		990.59	0.02498734		1520.59	0.14758397		2050.58	0.17400699		2580.58	0.07356097		3110.57	0.12635941		3640.57	0.07592402		4170.57	0.21360895
460.8	0.0631608		990.79	0.02606584		1520.79	0.14719733		2050.78	0.17507039		2580.78	0.07368074		3110.77	0.12677581		3640.77	0.07559899		4170.77	0.2136016
461	0.06344755		990.99	0.02554124		1520.99	0.14713998		2050.98	0.17493067		2580.98	0.07341466		3110.97	0.12706197		3640.97	0.07590362		4170.97	0.21415045
461.2	0.06333414		991.19	0.02602385		1521.19	0.14748547		2051.18	0.17641071		2581.18	0.07374125		3111.17	0.12723609		3641.17	0.07623827		4171.17	0.21341228
461.4	0.0645584		991.39	0.02571011		1521.39	0.14724431		2051.38	0.17662449		2581.38	0.07385524		3111.37	0.12623985		3641.37	0.07560442		4171.37	0.21366502
461.6	0.06446878		991.59	0.02538479		1521.59	0.14628502		2051.58	0.17639151		2581.58	0.07391899		3111.57	0.12536645		3641.57	0.07442724		4171.57	0.21431636
461.8	0.06364027		991.79	0.02475054		1521.79	0.14595562		2051.78	0.17571076		2581.78	0.07388587		3111.77	0.12589718		3641.77	0.07386048		4171.77	0.21439242
462	0.06331798		991.99	0.02536124		1521.99	0.14548567		2051.98	0.17581675		2581.98	0.07493862		3111.97	0.12575722		3641.97	0.07320611		4171.97	0.21392662
462.2	0.0627052		992.19	0.02461153		1522.19	0.14627897		2052.18	0.17527087		2582.18	0.07515221		3112.17	0.12488766		3642.17	0.07273191		4172.17	0.21361938
462.4	0.06286369		992.39	0.02470838		1522.39	0.14570437		2052.38	0.1747384		2582.38	0.0756588		3112.37	0.12499609		3642.37	0.0731794		4172.37	0.21329191
462.6	0.06303482		992.59	0.02401006		1522.59	0.14611791		2052.58	0.17412629		2582.58	0.075446		3112.57	0.12551051		3642.57	0.07367531		4172.57	0.21330519
462.8	0.06351997		992.79	0.02315176		1522.79	0.14632648		2052.78	0.17436634		2582.78	0.07567965		3112.77	0.12511051		3642.77	0.07385481		4172.77	0.21325013
463	0.06348058		992.99	0.02256166		1522.99	0.14683978		2052.98	0.17500085		2582.98	0.07500197		3112.97	0.1246287		3642.97	0.07413409		4172.97	0.21306634
463.2	0.06368623		993.19	0.02239685		1523.19	0.1471893		2053.18	0.17478862		2583.18	0.07529387		3113.17	0.12443756		3643.17	0.07399853		4173.17	0.21357579
463.4	0.06339166		993.39	0.02089489		1523.39	0.1472355		2053.38	0.17538301		2583.38	0.07462301		3113.37	0.12517264		3643.37	0.07399208		4173.37	0.21366123
463.6	0.06301186		993.59	0.02074868		1523.59	0.14682172		2053.58	0.17603256		2583.58	0.07372277		3113.57	0.1250983		3643.57	0.07457588		4173.57	0.21502789
463.8	0.06240047		993.79	0.0209862		1523.79	0.14661785		2053.78	0.17611247		2583.78	0.07409332		3113.77	0.12551794		3643.77	0.07439564		4173.77	0.21566264
464	0.0619788		993.99	0.02109498		1523.99	0.14699734		2053.98	0.17678719		2583.98	0.07416597		3113.97	0.12558289		3643.97	0.07402336		4173.97	0.21586253
464.2	0.06263656		994.19	0.02198802		1524.19	0.1468929		2054.18	0.17655865		2584.18	0.07438863		3114.17	0.12527709		3644.17	0.07428574		4174.17	0.21548533
464.4	0.06226705		994.39	0.02190348		1524.39	0.1472542		2054.38	0.17611371		2584.38	0.07502165		3114.37	0.12537699		3644.37	0.07448427		4174.37	0.21604677
464.6	0.06263976		994.59	0.0225727		1524.59	0.14792081		2054.58	0.17554142		2584.58	0.07537766		3114.57	0.12548818		3644.57	0.07500273		4174.57	0.21613785
464.8	0.0631041		994.79	0.02290614		1524.79	0.14697011		2054.78	0.17447693		2584.78	0.07580224		3114.77	0.12500728		3644.77	0.07530737		4174.77	0.2161892
465	0.06308911		994.99	0.02244202		1524.99	0.14697086		2054.98	0.17344012		2584.98	0.07645643		3114.97	0.1244212		3644.97	0.0753837		4174.97	0.21567821
465.2	0.06353736		995.19	0.02291085		1525.19	0.1462985		2055.18	0.1726544		2585.18	0.0764993		3115.17	0.12417348		3645.17	0.0745393		4175.17	0.21490715
465.4	0.0637114		995.39	0.02379303		1525.39	0.14560471		2055.38	0.172065		2585.38	0.07636761		3115.37	0.12344623		3645.37	0.07387167		4175.37	0.21487449
465.6	0.0634345		995.59	0.0241739		1525.59	0.14429492		2055.58	0.17166421		2585.58	0.07623566		3115.57	0.1229675		3645.57	0.07275347		4175.57	0.2143669
465.8	0.06311944		995.79	0.02416111		1525.79	0.14490195		2055.78	0.17120799		2585.78	0.07625065		3115.77	0.12240126		3645.77	0.07215813		4175.77	0.21330746
466	0.06312028		995.99	0.02410603		1525.99	0.14446975		2055.98	0.17133621		2585.98	0.07755835		3115.97	0.12220727		3645.97	0.070673		4175.97	0.21248946
466.2	0.06258202		996.19	0.02372748		1526.19	0.14500535		2056.18	0.17115892		2586.18	0.07742994		3116.17	0.12163065		3646.17	0.07004076		4176.17	0.21246233
466.4	0.06328238		996.39	0.02334616		1526.39	0.14483655		2056.38	0.17129102		2586.38	0.07777728		3116.37	0.12223925		3646.37	0.0699247		4176.37	0.21247638
466.6	0.06341335		996.59	0.02276984		1526.59	0.14526325		2056.58	0.17112845		2586.58	0.07765601		3116.57	0.12294812		3646.57	0.0693527		4176.57	0.21332544
466.8	0.06305655		996.79	0.02155863		1526.79	0.1455046		2056.78	0.17219251		2586.78	0.07842442		3116.77	0.12383555		3646.77	0.069508		4176.77	0.21371083
467	0.06289087		996.99	0.02092523		1526.99	0.14591566		2056.98	0.17194349		2586.98	0.07763371		3116.97	0.12415203		3646.97	0.06963679		4176.97	0.21406323
467.2	0.06213369		997.19	0.02015951		1527.19	0.14584699		2057.18	0.17277532		2587.18	0.07723728		3117.17	0.12489311		3647.17	0.06941601		4177.17	0.21505525
467.4	0.06191224		997.39	0.01818715		1527.39	0.1447032		2057.38	0.17335685		2587.38	0.07687679		3117.37	0.12550962		3647.37	0.0695254		4177.37	0.2157895
467.6	0.06134978		997.59	0.0172804		1527.59	0.14457875		2057.58	0.17395157		2587.58	0.07571085		3117.57	0.12516754		3647.57	0.07092812		4177.57	0.21672462
467.8	0.06115609		997.79	0.01615518		1527.79	0.14420254		2057.78	0.17488433		2587.78	0.07587674		3117.77	0.12623396		3647.77	0.07085327		4177.77	0.21664519
468	0.06109436		997.99	0.01617949		1527.99	0.14429972		2057.98	0.17541089		2587.98	0.07562822		3117.97	0.12562053		3647.97	0.07102892		4177.97	0.21626308
468.2	0.06123296		998.19	0.01631287		1528.19	0.14434939		2058.18	0.1743657		2588.18	0.07504125		3118.17	0.12496482		3648.17	0.07244505		4178.17	0.21712651
468.4	0.06054897		998.39	0.01644691		1528.39	0.14445916		2058.38	0.17467198		2588.38	0.07462796		3118.37	0.12489441		3648.37	0.07342219		4178.37	0.21755393
468.6	0.06026168		998.59	0.01728482		1528.59	0.14504857		2058.58	0.17488566		2588.58	0.07536947		3118.57	0.12405374		3648.57	0.07459507		4178.57	0.21662904
468.8	0.06080563		998.79	0.01760691		1528.79	0.14486736		2058.78	0.17449021		2588.78	0.07407535		3118.77	0.12416578		3648.77	0.07566097		4178.77	0.2165173
469	0.06076223		998.99	0.01760592		1528.99	0.14515493		2058.98	0.17346551		2588.98	0.07487743		3118.97	0.12379047		3648.97	0.0756567		4178.97	0.21653449
469.2	0.06117564		999.19	0.01863044		1529.19	0.14461307		2059.18	0.17237963		2589.18	0.07489971		3119.17	0.12366965		3649.17	0.07613125		4179.17	0.21670806
469.4	0.06072523		999.39	0.01970456		1529.39	0.14458516		2059.38	0.17283166		2589.38	0.0748069		3119.37	0.12299208		3649.37	0.07695328		4179.37	0.21629492
469.6	0.06027656		999.59	0.02039278		1529.59	0.143924		2059.58	0.17224753		2589.58	0.07468698		3119.57	0.12256801		3649.57	0.07732827		4179.57	0.21622563
469.8	0.06009552		999.79	0.02090056		1529.79	0.14420794		2059.78	0.17133497		2589.78	0.0757007		3119.77	0.12139434		3649.77	0.07743469		4179.77	0.21593989
470	0.06084697		999.99	0.0219144		1529.99	0.14362412		2059.98	0.17121353		2589.98	0.07646365		3119.97	0.122242		3649.97	0.07643787		4179.97	0.21609017
470.2	0.06044746		1000.19	0.02214234		1530.19	0.14384789		2060.18	0.17049004		2590.18	0.07667463		3120.17	0.12225714		3650.17	0.07701496		4180.17	0.21634628
470.4	0.06044985		1000.39	0.02192538		1530.39	0.14420976		2060.38	0.17060449		2590.38	0.07701891		3120.37	0.12214744		3650.37	0.07701173		4180.37	0.21616399
470.6	0.05990287		1000.59	0.02189925		1530.59	0.14514377		2060.58	0.17074251		2590.58	0.07764736		3120.57	0.12303304		3650.57	0.07674133		4180.57	0.21601948
470.8	0.05978709		1000.79	0.02167423		1530.79	0.14498681		2060.78	0.17150419		2590.78	0.07862751		3120.77	0.12297449		3650.77	0.07747895		4180.77	0.21596632
471	0.05925059		1000.99	0.02176345		1530.99	0.14491371		2060.98	0.17126878		2590.98	0.07820898		3120.97	0.12328658		3650.97	0.07737935		4180.97	0.21507599
471.2	0.0586126		1001.19	0.02084844		1531.19	0.14468577		2061.18	0.17221197		2591.18	0.0771709		3121.17	0.12334948		3651.17	0.07643656		4181.17	0.21481425
471.4	0.05900073		1001.39	0.02021009		1531.39	0.14403882		2061.38	0.17248081		2591.38	0.07761556		3121.37	0.12276985		3651.37	0.07648559		4181.37	0.21431493
471.6	0.05852472		1001.59	0.01970185		1531.59	0.1444368		2061.58	0.17263693		2591.58	0.0771986		3121.57	0.1229649		3651.57	0.07640127		4181.57	0.21406845
471.8	0.05886285		1001.79	0.01954217		1531.79	0.14478691		2061.78	0.17267194		2591.78	0.07646559		3121.77	0.12337355		3651.77	0.07536688		4181.77	0.21377824
472	0.05830884		1001.99	0.01991736		1531.99	0.14528408		2061.98	0.17215603		2591.98	0.07579775		3121.97	0.12242169		3651.97	0.07494741		4181.97	0.21350834
472.2	0.05779614		1002.19	0.02018135		1532.19	0.1450769		2062.18	0.17267868		2592.18	0.07491007		3122.17	0.12304981		3652.17	0.0745813		4182.17	0.21398703
472.4	0.05768614		1002.39	0.02000109		1532.39	0.14484844		2062.38	0.1731264		2592.38	0.07456577		3122.37	0.12282599		3652.37	0.07464448		4182.37	0.21368106
472.6	0.05768971		1002.59	0.02021833		1532.59	0.14504845		2062.58	0.1734193		2592.58	0.07509791		3122.57	0.12336836		3652.57	0.0744878		4182.57	0.21321527
472.8	0.05849651		1002.79	0.01994571		1532.79	0.14497854		2062.78	0.17297632		2592.78	0.07361581		3122.77	0.12389771		3652.77	0.07517163		4182.77	0.21351657
473	0.05862636		1002.99	0.01924413		1532.99	0.14435672		2062.98	0.17237527		2592.98	0.07376476		3122.97	0.12421684		3652.97	0.07461216		4182.97	0.21296354
473.2	0.05906731		1003.19	0.0193122		1533.19	0.14433528		2063.18	0.17320434		2593.18	0.07341569		3123.17	0.12464951		3653.17	0.07552362		4183.17	0.21302993
473.4	0.05871751		1003.39	0.01932623		1533.39	0.14405393		2063.38	0.17355307		2593.38	0.07321135		3123.37	0.12453504		3653.37	0.07631145		4183.37	0.21229221
473.6	0.05929399		1003.59	0.01975976		1533.59	0.14352236		2063.58	0.17244379		2593.58	0.07326805		3123.57	0.12340426		3653.57	0.07747602		4183.57	0.21200355
473.8	0.06035168		1003.79	0.01989948		1533.79	0.14348579		2063.78	0.17223649		2593.78	0.07353226		3123.77	0.12258072		3653.77	0.07735877		4183.77	0.21158453
474	0.06093807		1003.99	0.02030201		1533.99	0.14357191		2063.98	0.17196934		2593.98	0.07371491		3123.97	0.12352121		3653.97	0.0775625		4183.97	0.21126756
474.2	0.06007891		1004.19	0.01861272		1534.19	0.1443171		2064.18	0.17153958		2594.18	0.07364303		3124.17	0.12306681		3654.17	0.07801492		4184.17	0.21047668
474.4	0.05999431		1004.39	0.0184358		1534.39	0.14491595		2064.38	0.17169863		2594.38	0.07410904		3124.37	0.12216949		3654.37	0.07713897		4184.37	0.210644
474.6	0.06015205		1004.59	0.01896471		1534.59	0.14506087		2064.58	0.17172537		2594.58	0.07437075		3124.57	0.1225549		3654.57	0.077439		4184.57	0.20971568
474.8	0.06045802		1004.79	0.01900177		1534.79	0.14530822		2064.78	0.17185798		2594.78	0.07462881		3124.77	0.12186298		3654.77	0.07736012		4184.77	0.20992973
475	0.06000262		1004.99	0.01936364		1534.99	0.14650303		2064.98	0.17183272		2594.98	0.07477707		3124.97	0.12260885		3654.97	0.07670606		4184.97	0.20958146
475.2	0.05957473		1005.19	0.01889663		1535.19	0.14709261		2065.18	0.17170489		2595.18	0.07462684		3125.17	0.12244808		3655.17	0.07648885		4185.17	0.21040376
475.4	0.06002917		1005.39	0.01923608		1535.39	0.14723554		2065.38	0.17137193		2595.38	0.07581534		3125.37	0.12198806		3655.37	0.07617671		4185.37	0.2111107
475.6	0.06034246		1005.59	0.01870385		1535.59	0.14687626		2065.58	0.171028		2595.58	0.07601264		3125.57	0.1220446		3655.57	0.07505666		4185.57	0.21160532
475.8	0.06007591		1005.79	0.01843468		1535.79	0.14696044		2065.78	0.17050787		2595.78	0.07612457		3125.77	0.1213824		3655.77	0.0745036		4185.77	0.21193285
476	0.05945705		1005.99	0.01856608		1535.99	0.14665299		2065.98	0.16995522		2595.98	0.0765149		3125.97	0.12197197		3655.97	0.07415237		4185.97	0.21224224
476.2	0.05966983		1006.19	0.01883626		1536.19	0.14558497		2066.18	0.17120818		2596.18	0.0771437		3126.17	0.12284703		3656.17	0.07370235		4186.17	0.21305599
476.4	0.05896189		1006.39	0.01860527		1536.39	0.1446441		2066.38	0.16996371		2596.38	0.0771072		3126.37	0.12316455		3656.37	0.07337895		4186.37	0.21390113
476.6	0.05809279		1006.59	0.01917151		1536.59	0.14411346		2066.58	0.1704063		2596.58	0.07802064		3126.57	0.12315375		3656.57	0.0731634		4186.57	0.21417252
476.8	0.05874769		1006.79	0.0194362		1536.79	0.14353737		2066.78	0.16987895		2596.78	0.07759164		3126.77	0.12319409		3656.77	0.07347596		4186.77	0.21448364
477	0.05872017		1006.99	0.01852891		1536.99	0.14316919		2066.98	0.17071596		2596.98	0.07697808		3126.97	0.12329111		3656.97	0.07373474		4186.97	0.21429642
477.2	0.05862431		1007.19	0.01811624		1537.19	0.14296051		2067.18	0.17097482		2597.18	0.07699429		3127.17	0.12309036		3657.17	0.0743933		4187.17	0.21466182
477.4	0.05865542		1007.39	0.01888358		1537.39	0.14290064		2067.38	0.17093903		2597.38	0.07655607		3127.37	0.12176172		3657.37	0.07415603		4187.37	0.21374575
477.6	0.05965898		1007.59	0.0188677		1537.59	0.14269803		2067.58	0.17128324		2597.58	0.07624532		3127.57	0.12156527		3657.57	0.07417924		4187.57	0.21422671
477.8	0.059549		1007.79	0.01931652		1537.79	0.14255796		2067.78	0.17209257		2597.78	0.07587111		3127.77	0.12254024		3657.77	0.07394196		4187.77	0.21406366
478	0.05885372		1007.99	0.01922284		1537.99	0.14272327		2067.98	0.17257917		2597.98	0.0750443		3127.97	0.12293619		3657.97	0.07384514		4187.97	0.21464757
478.2	0.05785954		1008.19	0.01835815		1538.19	0.14288428		2068.18	0.17283419		2598.18	0.07415384		3128.17	0.12162253		3658.17	0.07349769		4188.17	0.21496835
478.4	0.05805423		1008.39	0.0189433		1538.39	0.14360737		2068.38	0.17364958		2598.38	0.07379646		3128.37	0.12137083		3658.37	0.0733016		4188.37	0.21520457
478.6	0.05826028		1008.59	0.01973628		1538.59	0.14390646		2068.58	0.17407024		2598.58	0.07275617		3128.57	0.12137654		3658.57	0.07312708		4188.57	0.21457849
478.8	0.05790337		1008.79	0.02036666		1538.79	0.14414472		2068.78	0.17428649		2598.78	0.07250645		3128.77	0.12133279		3658.77	0.07281572		4188.77	0.21494254
479	0.05788695		1008.99	0.02120826		1538.99	0.14429402		2068.98	0.17440285		2598.98	0.07283547		3128.97	0.122602		3658.97	0.07335578		4188.97	0.21531137
479.2	0.05771493		1009.19	0.02047601		1539.19	0.14419465		2069.18	0.17487414		2599.18	0.07241205		3129.17	0.12240558		3659.17	0.07406059		4189.17	0.21582048
479.4	0.05796479		1009.39	0.02018247		1539.39	0.14400036		2069.38	0.17572859		2599.38	0.07280941		3129.37	0.12179106		3659.37	0.07382709		4189.37	0.21657572
479.6	0.05761841		1009.59	0.02004197		1539.59	0.14368856		2069.58	0.17500456		2599.58	0.0734712		3129.57	0.12126396		3659.57	0.07317765		4189.57	0.21603787
479.8	0.05738601		1009.79	0.0205487		1539.79	0.1437705		2069.78	0.17467388		2599.78	0.07390477		3129.77	0.12158682		3659.77	0.07375324		4189.77	0.21666943
480	0.05733857		1009.99	0.02109442		1539.99	0.14331009		2069.98	0.17436377		2599.98	0.07492867		3129.97	0.12234366		3659.97	0.07449997		4189.97	0.21697672
480.2	0.05677915		1010.19	0.02077195		1540.19	0.14311284		2070.18	0.1746328		2600.18	0.07521186		3130.17	0.12246796		3660.17	0.07478707		4190.17	0.21675766
480.4	0.05612113		1010.39	0.0208859		1540.39	0.14310473		2070.38	0.17286627		2600.38	0.07554715		3130.37	0.122608		3660.37	0.07501648		4190.37	0.21685002
480.6	0.05557522		1010.59	0.02004776		1540.59	0.14365065		2070.58	0.17373149		2600.58	0.07681127		3130.57	0.12239169		3660.57	0.07582091		4190.57	0.21632802
480.8	0.05631567		1010.79	0.0190836		1540.79	0.14347903		2070.78	0.17289551		2600.78	0.07600353		3130.77	0.12289444		3660.77	0.07621362		4190.77	0.21555861
481	0.05564119		1010.99	0.01773435		1540.99	0.14317947		2070.98	0.17237725		2600.98	0.07560626		3130.97	0.12335464		3660.97	0.07631341		4190.97	0.21467846
481.2	0.05532993		1011.19	0.01727909		1541.19	0.14226796		2071.18	0.17192995		2601.18	0.07656496		3131.17	0.12354678		3661.17	0.07540894		4191.17	0.21438888
481.4	0.05585847		1011.39	0.01769407		1541.39	0.14303192		2071.38	0.1722812		2601.38	0.07665752		3131.37	0.12358113		3661.37	0.07498994		4191.37	0.2135891
481.6	0.05548709		1011.59	0.01764198		1541.59	0.14264522		2071.58	0.17245298		2601.58	0.07609773		3131.57	0.12470114		3661.57	0.07423505		4191.57	0.21379841
481.8	0.0554136		1011.79	0.01779462		1541.79	0.14247717		2071.78	0.17223357		2601.78	0.07596493		3131.77	0.1251921		3661.77	0.07409335		4191.77	0.21245389
482	0.05542996		1011.99	0.0178424		1541.99	0.14269036		2071.98	0.17212977		2601.98	0.07555457		3131.97	0.12531667		3661.97	0.07359317		4191.97	0.21357629
482.2	0.05511586		1012.19	0.01773149		1542.19	0.14339962		2072.18	0.1718194		2602.18	0.07550751		3132.17	0.12487061		3662.17	0.07305572		4192.17	0.21297815
482.4	0.05588684		1012.39	0.01789284		1542.39	0.14442105		2072.38	0.17195796		2602.38	0.0751224		3132.37	0.12481186		3662.37	0.07290331		4192.37	0.21235786
482.6	0.05677429		1012.59	0.01781596		1542.59	0.14354693		2072.58	0.17120503		2602.58	0.07505411		3132.57	0.12464706		3662.57	0.07229524		4192.57	0.21216544
482.8	0.05764556		1012.79	0.01870796		1542.79	0.14319618		2072.78	0.1714398		2602.78	0.07473341		3132.77	0.1245406		3662.77	0.07322434		4192.77	0.21294188
483	0.05924732		1012.99	0.01892326		1542.99	0.14409436		2072.98	0.17149024		2602.98	0.07496495		3132.97	0.12389228		3662.97	0.07306823		4192.97	0.21354133
483.2	0.05919672		1013.19	0.01848212		1543.19	0.1439605		2073.18	0.17266123		2603.18	0.07528664		3133.17	0.12320992		3663.17	0.07359862		4193.17	0.21424092
483.4	0.06017534		1013.39	0.01963377		1543.39	0.14490996		2073.38	0.1716695		2603.38	0.07537116		3133.37	0.12270185		3663.37	0.07358981		4193.37	0.21532413
483.6	0.06049633		1013.59	0.02038376		1543.59	0.14564845		2073.58	0.1716205		2603.58	0.07566966		3133.57	0.12224735		3663.57	0.07416711		4193.57	0.21483313
483.8	0.06174833		1013.79	0.02114477		1543.79	0.14601968		2073.78	0.17264464		2603.78	0.07594809		3133.77	0.12223469		3663.77	0.07410234		4193.77	0.21581114
484	0.06193043		1013.99	0.02065236		1543.99	0.14642797		2073.98	0.17297346		2603.98	0.07523721		3133.97	0.12103763		3663.97	0.07403487		4193.97	0.21512062
484.2	0.06145844		1014.19	0.01977512		1544.19	0.14796424		2074.18	0.1733055		2604.18	0.07404139		3134.17	0.12144803		3664.17	0.07377796		4194.17	0.21475124
484.4	0.06140266		1014.39	0.01996896		1544.39	0.14825016		2074.38	0.1733076		2604.38	0.0738732		3134.37	0.12218469		3664.37	0.07378373		4194.37	0.21469274
484.6	0.0607328		1014.59	0.01914084		1544.59	0.1474154		2074.58	0.17406165		2604.58	0.07300338		3134.57	0.12207052		3664.57	0.07475847		4194.57	0.21430902
484.8	0.06035579		1014.79	0.01884847		1544.79	0.14566686		2074.78	0.17363681		2604.78	0.0721677		3134.77	0.12283754		3664.77	0.07532626		4194.77	0.21395086
485	0.05929691		1014.99	0.01937509		1544.99	0.14543852		2074.98	0.17409579		2604.98	0.07240351		3134.97	0.12333911		3664.97	0.07475671		4194.97	0.21373999
485.2	0.05861731		1015.19	0.01982462		1545.19	0.14537141		2075.18	0.17452369		2605.18	0.07284229		3135.17	0.12363883		3665.17	0.07436511		4195.17	0.21294943
485.4	0.05812691		1015.39	0.02018313		1545.39	0.14513564		2075.38	0.17405454		2605.38	0.07202688		3135.37	0.12462006		3665.37	0.07436322		4195.37	0.21226017
485.6	0.0576234		1015.59	0.02056885		1545.59	0.14507936		2075.58	0.17399233		2605.58	0.07252802		3135.57	0.12539754		3665.57	0.07385495		4195.57	0.21195038
485.8	0.05744345		1015.79	0.019758		1545.79	0.14481496		2075.78	0.17385263		2605.78	0.07285222		3135.77	0.12541649		3665.77	0.07421326		4195.77	0.21135209
486	0.05593066		1015.99	0.01911539		1545.99	0.14473306		2075.98	0.174094		2605.98	0.07270535		3135.97	0.1264389		3665.97	0.07375812		4195.97	0.21185893
486.2	0.05538698		1016.19	0.0183368		1546.19	0.14409451		2076.18	0.17389658		2606.18	0.07332705		3136.17	0.12657932		3666.17	0.07298493		4196.17	0.21050374
486.4	0.05579485		1016.39	0.01835388		1546.39	0.14337723		2076.38	0.17349836		2606.38	0.07313037		3136.37	0.12621979		3666.37	0.07351967		4196.37	0.21006981
486.6	0.05640111		1016.59	0.01744055		1546.59	0.14272038		2076.58	0.17313352		2606.58	0.07370188		3136.57	0.12556998		3666.57	0.07313122		4196.57	0.21007268
486.8	0.05656511		1016.79	0.01804322		1546.79	0.14275875		2076.78	0.17261158		2606.78	0.07347046		3136.77	0.12492783		3666.77	0.07368103		4196.77	0.21009733
487	0.05681964		1016.99	0.01776818		1546.99	0.14333629		2076.98	0.172029		2606.98	0.07421863		3136.97	0.12409393		3666.97	0.07262882		4196.97	0.20977289
487.2	0.05622236		1017.19	0.01808857		1547.19	0.14321319		2077.18	0.17246444		2607.18	0.07462903		3137.17	0.12444943		3667.17	0.07367311		4197.17	0.20997851
487.4	0.05652556		1017.39	0.01819694		1547.39	0.14482553		2077.38	0.17137225		2607.38	0.07452019		3137.37	0.1242664		3667.37	0.07368585		4197.37	0.21068281
487.6	0.0568011		1017.59	0.01723075		1547.59	0.14460692		2077.58	0.17265595		2607.58	0.07438559		3137.57	0.12327039		3667.57	0.07398519		4197.57	0.21032702
487.8	0.05702183		1017.79	0.01692766		1547.79	0.1440112		2077.78	0.17166896		2607.78	0.0740153		3137.77	0.12276835		3667.77	0.07386669		4197.77	0.21074375
488	0.05747585		1017.99	0.0170889		1547.99	0.14494796		2077.98	0.17097793		2607.98	0.07325014		3137.97	0.12289123		3667.97	0.07359987		4197.97	0.21126837
488.2	0.05752128		1018.19	0.01762439		1548.19	0.1453024		2078.18	0.17088933		2608.18	0.07332594		3138.17	0.12395747		3668.17	0.07378128		4198.17	0.21145531
488.4	0.05741341		1018.39	0.01825399		1548.39	0.1444675		2078.38	0.17047576		2608.38	0.07302542		3138.37	0.12426651		3668.37	0.07416316		4198.37	0.21103612
488.6	0.05760241		1018.59	0.01910585		1548.59	0.14388086		2078.58	0.17009174		2608.58	0.0730373		3138.57	0.12341938		3668.57	0.07487804		4198.57	0.21175492
488.8	0.05822655		1018.79	0.01995199		1548.79	0.14379833		2078.78	0.17029698		2608.78	0.0730876		3138.77	0.12337366		3668.77	0.0743271		4198.77	0.21214373
489	0.05797577		1018.99	0.02106356		1548.99	0.14456228		2078.98	0.17007434		2608.98	0.0727018		3138.97	0.12355727		3668.97	0.07386817		4198.97	0.21209364
489.2	0.05794455		1019.19	0.02224267		1549.19	0.14391817		2079.18	0.16993969		2609.18	0.07249701		3139.17	0.12408518		3669.17	0.07362802		4199.17	0.21222738
489.4	0.05771797		1019.39	0.02240635		1549.39	0.14344495		2079.38	0.17066903		2609.38	0.07273438		3139.37	0.12451993		3669.37	0.073577		4199.37	0.21313064
489.6	0.05753425		1019.59	0.02344564		1549.59	0.14311524		2079.58	0.17098344		2609.58	0.07415525		3139.57	0.12374558		3669.57	0.07328226		4199.57	0.21352786
489.8	0.05741298		1019.79	0.02321559		1549.79	0.14198467		2079.78	0.17132042		2609.78	0.07385773		3139.77	0.12389961		3669.77	0.0734664		4199.77	0.21376203
490	0.05708736		1019.99	0.02325617		1549.99	0.14149844		2079.98	0.17033941		2609.98	0.073945		3139.97	0.12441599		3669.97	0.07321582		4199.97	0.21308268
490.2	0.05753		1020.19	0.02285223		1550.19	0.14070314		2080.18	0.17012806		2610.18	0.07398685		3140.17	0.1241395		3670.17	0.07265754		4200.17	0.21237321
490.4	0.05781397		1020.39	0.02315492		1550.39	0.14041805		2080.38	0.1699517		2610.38	0.07402036		3140.37	0.12308981		3670.37	0.07288736		4200.37	0.21295248
490.6	0.05812875		1020.59	0.02284948		1550.59	0.14050294		2080.58	0.16996614		2610.58	0.07443564		3140.57	0.12256578		3670.57	0.07245221		4200.57	0.21287516
490.8	0.05802753		1020.79	0.02277723		1550.79	0.14098479		2080.78	0.17009711		2610.78	0.07386747		3140.77	0.12193879		3670.77	0.0724246		4200.77	0.21335
491	0.05838034		1020.99	0.02195214		1550.99	0.14150701		2080.98	0.17045338		2610.98	0.07399978		3140.97	0.12171639		3670.97	0.07128387		4200.97	0.21284111
491.2	0.05833778		1021.19	0.02159045		1551.19	0.14105727		2081.18	0.1707441		2611.18	0.07443066		3141.17	0.12203854		3671.17	0.07224829		4201.17	0.21199632
491.4	0.05815434		1021.39	0.02120371		1551.39	0.14074527		2081.38	0.17148536		2611.38	0.07423723		3141.37	0.12245564		3671.37	0.07267952		4201.37	0.21316879
491.6	0.05777633		1021.59	0.02107091		1551.59	0.14010512		2081.58	0.172005		2611.58	0.07432425		3141.57	0.12178243		3671.57	0.07333705		4201.57	0.21292374
491.8	0.05739283		1021.79	0.0210566		1551.79	0.13985199		2081.78	0.17120376		2611.78	0.07404422		3141.77	0.12225942		3671.77	0.0736937		4201.77	0.21261356
492	0.05744154		1021.99	0.02126191		1551.99	0.14119355		2081.98	0.17087759		2611.98	0.0744771		3141.97	0.12219353		3671.97	0.07267376		4201.97	0.21369787
492.2	0.05610419		1022.19	0.02149539		1552.19	0.14110712		2082.18	0.17095893		2612.18	0.07445559		3142.17	0.12216543		3672.17	0.07272916		4202.17	0.21258128
492.4	0.0547967		1022.39	0.02116675		1552.39	0.14140819		2082.38	0.17132875		2612.38	0.07501146		3142.37	0.12192344		3672.37	0.07273248		4202.37	0.21246814
492.6	0.05475375		1022.59	0.02110711		1552.59	0.14211198		2082.58	0.17121853		2612.58	0.07488781		3142.57	0.12213272		3672.57	0.07247145		4202.57	0.21356903
492.8	0.05387075		1022.79	0.02090313		1552.79	0.1423639		2082.78	0.17168134		2612.78	0.07484423		3142.77	0.12236367		3672.77	0.07177307		4202.77	0.21307171
493	0.05220295		1022.99	0.02085809		1552.99	0.14277729		2082.98	0.17232272		2612.98	0.07395196		3142.97	0.12306037		3672.97	0.07249716		4202.97	0.21275002
493.2	0.05207551		1023.19	0.0211886		1553.19	0.14237661		2083.18	0.17318885		2613.18	0.07413138		3143.17	0.12290562		3673.17	0.07265082		4203.17	0.21181465
493.4	0.05132993		1023.39	0.02115982		1553.39	0.14247344		2083.38	0.173489		2613.38	0.07465593		3143.37	0.12287677		3673.37	0.07284865		4203.37	0.2116725
493.6	0.05098012		1023.59	0.02116697		1553.59	0.14221211		2083.58	0.17291403		2613.58	0.07467075		3143.57	0.12318658		3673.57	0.07336001		4203.57	0.21177439
493.8	0.05196948		1023.79	0.02090528		1553.79	0.14302562		2083.78	0.17319845		2613.78	0.07388029		3143.77	0.12311232		3673.77	0.07381839		4203.77	0.21156949
494	0.05168462		1023.99	0.02068449		1553.99	0.14308981		2083.98	0.172413		2613.98	0.0734852		3143.97	0.12296451		3673.97	0.07419665		4203.97	0.21094399
494.2	0.05262353		1024.19	0.02052514		1554.19	0.14366197		2084.18	0.1732877		2614.18	0.07301785		3144.17	0.12210091		3674.17	0.0737648		4204.17	0.21091071
494.4	0.05344368		1024.39	0.02091387		1554.39	0.14443179		2084.38	0.17282914		2614.38	0.07267422		3144.37	0.12173482		3674.37	0.07490991		4204.37	0.21215371
494.6	0.05392203		1024.59	0.01996245		1554.59	0.14431594		2084.58	0.17266844		2614.58	0.07217308		3144.57	0.12185746		3674.57	0.07501301		4204.57	0.21200235
494.8	0.05472826		1024.79	0.0195621		1554.79	0.14451401		2084.78	0.17254632		2614.78	0.07168271		3144.77	0.12117542		3674.77	0.0740321		4204.77	0.21170547
495	0.05569036		1024.99	0.01958537		1554.99	0.14394583		2084.98	0.17257964		2614.98	0.072499		3144.97	0.12131714		3674.97	0.0746299		4204.97	0.21032381
495.2	0.05610342		1025.19	0.01968003		1555.19	0.14393202		2085.18	0.17263763		2615.18	0.07234486		3145.17	0.12130749		3675.17	0.0758648		4205.17	0.21065196
495.4	0.05553439		1025.39	0.02104915		1555.39	0.14271288		2085.38	0.17252224		2615.38	0.07135107		3145.37	0.1211977		3675.37	0.07525884		4205.37	0.21173558
495.6	0.05567644		1025.59	0.02091949		1555.59	0.14251047		2085.58	0.17112701		2615.58	0.07136611		3145.57	0.12065876		3675.57	0.07531032		4205.57	0.21213959
495.8	0.05582841		1025.79	0.02110102		1555.79	0.14252747		2085.78	0.17047043		2615.78	0.07096509		3145.77	0.12078543		3675.77	0.07477211		4205.77	0.21255218
496	0.05517907		1025.99	0.02131406		1555.99	0.14222903		2085.98	0.16941144		2615.98	0.0710221		3145.97	0.12066872		3675.97	0.07395766		4205.97	0.21316362
496.2	0.05491909		1026.19	0.02138282		1556.19	0.14197084		2086.18	0.16905155		2616.18	0.07126136		3146.17	0.121216		3676.17	0.07397598		4206.17	0.21256474
496.4	0.05444472		1026.39	0.02038104		1556.39	0.14196531		2086.38	0.16856782		2616.38	0.07162309		3146.37	0.12153083		3676.37	0.07379314		4206.37	0.21361908
496.6	0.05424264		1026.59	0.01987931		1556.59	0.14174179		2086.58	0.16781288		2616.58	0.07050716		3146.57	0.12184658		3676.57	0.07377294		4206.57	0.21342712
496.8	0.05355731		1026.79	0.01976419		1556.79	0.14090495		2086.78	0.16781249		2616.78	0.07040775		3146.77	0.1221463		3676.77	0.07337294		4206.77	0.21244296
497	0.05409762		1026.99	0.01965332		1556.99	0.14093058		2086.98	0.16718639		2616.98	0.06953032		3146.97	0.12295109		3676.97	0.07408093		4206.97	0.2122629
497.2	0.05459441		1027.19	0.01915321		1557.19	0.14040537		2087.18	0.16710667		2617.18	0.0697285		3147.17	0.12328333		3677.17	0.07390358		4207.17	0.21194807
497.4	0.05412712		1027.39	0.01907362		1557.39	0.14002648		2087.38	0.16759508		2617.38	0.06916889		3147.37	0.12411573		3677.37	0.07393537		4207.37	0.21279874
497.6	0.053684		1027.59	0.01844908		1557.59	0.14017732		2087.58	0.16838915		2617.58	0.06829604		3147.57	0.12447605		3677.57	0.0741692		4207.57	0.21328852
497.8	0.05410179		1027.79	0.01868624		1557.79	0.13988932		2087.78	0.16844732		2617.78	0.06868527		3147.77	0.12445803		3677.77	0.07520051		4207.77	0.21304261
498	0.0538641		1027.99	0.01860656		1557.99	0.1395186		2087.98	0.16907376		2617.98	0.06978142		3147.97	0.12467963		3677.97	0.0742484		4207.97	0.21272098
498.2	0.05394441		1028.19	0.01812256		1558.19	0.14007747		2088.18	0.17008899		2618.18	0.07054814		3148.17	0.12427798		3678.17	0.07338958		4208.17	0.21256839
498.4	0.05377779		1028.39	0.01803507		1558.39	0.13960071		2088.38	0.17007875		2618.38	0.0705884		3148.37	0.12475988		3678.37	0.07401455		4208.37	0.21232996
498.6	0.05383777		1028.59	0.01712297		1558.59	0.13832454		2088.58	0.17117366		2618.58	0.07163671		3148.57	0.12439775		3678.57	0.07305586		4208.57	0.2111976
498.8	0.05390715		1028.79	0.01754848		1558.79	0.13856396		2088.78	0.17187382		2618.78	0.07265534		3148.77	0.12281472		3678.77	0.07323462		4208.77	0.21053108
499	0.05364499		1028.99	0.01805076		1558.99	0.13908414		2088.98	0.17334611		2618.98	0.07351275		3148.97	0.12266577		3678.97	0.07345186		4208.97	0.21012095
499.2	0.0538953		1029.19	0.01846208		1559.19	0.14016753		2089.18	0.17279678		2619.18	0.07329514		3149.17	0.12227157		3679.17	0.07350532		4209.17	0.21023078
499.4	0.05383414		1029.39	0.01959306		1559.39	0.13980432		2089.38	0.17313226		2619.38	0.07336618		3149.37	0.12193571		3679.37	0.07225284		4209.37	0.21094009
499.6	0.0545476		1029.59	0.01972869		1559.59	0.14098987		2089.58	0.17251215		2619.58	0.07377831		3149.57	0.12165361		3679.57	0.0730226		4209.57	0.21150531
499.8	0.05486273		1029.79	0.02027714		1559.79	0.14134789		2089.78	0.1718977		2619.78	0.07459711		3149.77	0.12152941		3679.77	0.07276151		4209.77	0.21141645
500	0.05559978		1029.99	0.02100245		1559.99	0.14122202		2089.98	0.17151022		2619.98	0.07420618		3149.97	0.12061736		3679.97	0.07330855		4209.97	0.21116984
500.2	0.05601125		1030.19	0.02097137		1560.19	0.14197974		2090.18	0.17167682		2620.18	0.07378391		3150.17	0.11940399		3680.17	0.07420575		4210.17	0.21176531
500.4	0.05580349		1030.39	0.02101338		1560.39	0.14174332		2090.38	0.1704823		2620.38	0.073109		3150.37	0.11958193		3680.37	0.07470408		4210.37	0.21152982
500.6	0.05595507		1030.59	0.02080551		1560.59	0.14191446		2090.58	0.16995419		2620.58	0.07294013		3150.57	0.11937095		3680.57	0.07472946		4210.57	0.21086606
500.8	0.05617523		1030.79	0.02065198		1560.79	0.14201725		2090.78	0.16968924		2620.78	0.07298588		3150.77	0.12029587		3680.77	0.07431081		4210.77	0.21149611
501	0.05686368		1030.99	0.01963548		1560.99	0.14293633		2090.98	0.16907162		2620.98	0.07232447		3150.97	0.120379		3680.97	0.07504602		4210.97	0.21180045
501.2	0.05724243		1031.19	0.01914298		1561.19	0.1435289		2091.18	0.16916002		2621.18	0.07171738		3151.17	0.12031276		3681.17	0.07537506		4211.17	0.21189943
501.4	0.05730878		1031.39	0.01961085		1561.39	0.14398051		2091.38	0.16938303		2621.38	0.07111009		3151.37	0.12103455		3681.37	0.07540842		4211.37	0.21222181
501.6	0.05737252		1031.59	0.01981096		1561.59	0.14497553		2091.58	0.16833335		2621.58	0.07066846		3151.57	0.12183081		3681.57	0.07547685		4211.57	0.21245016
501.8	0.05786599		1031.79	0.02042373		1561.79	0.14508381		2091.78	0.16769357		2621.78	0.07109679		3151.77	0.12195688		3681.77	0.07552647		4211.77	0.21277243
502	0.05785016		1031.99	0.01977277		1561.99	0.14483071		2091.98	0.16832023		2621.98	0.0715966		3151.97	0.12190756		3681.97	0.07404717		4211.97	0.21241318
502.2	0.05730748		1032.19	0.01949905		1562.19	0.14555063		2092.18	0.16835675		2622.18	0.07145329		3152.17	0.1224082		3682.17	0.07426766		4212.17	0.21281051
502.4	0.05745994		1032.39	0.01981795		1562.39	0.14559153		2092.38	0.16757225		2622.38	0.07053681		3152.37	0.12292815		3682.37	0.07423643		4212.37	0.21197342
502.6	0.05711095		1032.59	0.01935371		1562.59	0.14615963		2092.58	0.16838318		2622.58	0.07113769		3152.57	0.1233859		3682.57	0.07407382		4212.57	0.21209446
502.8	0.05614497		1032.79	0.01935024		1562.79	0.14668721		2092.78	0.16851112		2622.78	0.07144631		3152.77	0.12382995		3682.77	0.07460081		4212.77	0.21220276
503	0.05615547		1032.99	0.01924568		1562.99	0.14750874		2092.98	0.16936688		2622.98	0.07110207		3152.97	0.12503639		3682.97	0.07358108		4212.97	0.21181377
503.2	0.05562119		1033.19	0.01960622		1563.19	0.14777148		2093.18	0.16917936		2623.18	0.07148899		3153.17	0.12519431		3683.17	0.07351764		4213.17	0.21266274
503.4	0.05530757		1033.39	0.01974049		1563.39	0.14739922		2093.38	0.1693803		2623.38	0.07227612		3153.37	0.12535095		3683.37	0.0722259		4213.37	0.21284839
503.6	0.05531673		1033.59	0.02079875		1563.59	0.14769237		2093.58	0.16839956		2623.58	0.07293697		3153.57	0.1255909		3683.57	0.07214826		4213.57	0.21230075
503.8	0.05507783		1033.79	0.02112917		1563.79	0.14680882		2093.78	0.16831003		2623.78	0.07365654		3153.77	0.12548819		3683.77	0.07183049		4213.77	0.21166248
504	0.05475958		1033.99	0.02187235		1563.99	0.14631881		2093.98	0.16909999		2623.98	0.07271751		3153.97	0.12409747		3683.97	0.07090714		4213.97	0.21114289
504.2	0.05360751		1034.19	0.02140144		1564.19	0.14617141		2094.18	0.16969427		2624.18	0.07335193		3154.17	0.1244324		3684.17	0.07076275		4214.17	0.21107687
504.4	0.05239151		1034.39	0.02099679		1564.39	0.14544839		2094.38	0.16976864		2624.38	0.07400565		3154.37	0.12451568		3684.37	0.07040568		4214.37	0.21074556
504.6	0.05232422		1034.59	0.02006825		1564.59	0.14476615		2094.58	0.17055805		2624.58	0.07377043		3154.57	0.12399078		3684.57	0.06977993		4214.57	0.21082464
504.8	0.05160637		1034.79	0.01950436		1564.79	0.14444012		2094.78	0.17083496		2624.78	0.07325432		3154.77	0.12294327		3684.77	0.07030384		4214.77	0.21200115
505	0.05180893		1034.99	0.01872268		1564.99	0.14509653		2094.98	0.17011947		2624.98	0.07284505		3154.97	0.12219501		3684.97	0.0708361		4214.97	0.21124775
505.2	0.05211065		1035.19	0.01911785		1565.19	0.14480171		2095.18	0.16923299		2625.18	0.07256433		3155.17	0.12158168		3685.17	0.07126605		4215.17	0.21170247
505.4	0.05141913		1035.39	0.01961417		1565.39	0.14379472		2095.38	0.16861629		2625.38	0.07173638		3155.37	0.12121954		3685.37	0.07169168		4215.37	0.21229939
505.6	0.05138643		1035.59	0.01952327		1565.59	0.14295094		2095.58	0.1677088		2625.58	0.07073548		3155.57	0.12003736		3685.57	0.07292425		4215.57	0.21318242
505.8	0.05156656		1035.79	0.01998771		1565.79	0.14190102		2095.78	0.16742318		2625.78	0.07010548		3155.77	0.11945317		3685.77	0.07401564		4215.77	0.21441717
506	0.05269781		1035.99	0.01905732		1565.99	0.14070263		2095.98	0.16802948		2625.98	0.06921148		3155.97	0.11924153		3685.97	0.07453362		4215.97	0.21374224
506.2	0.05334205		1036.19	0.01933367		1566.19	0.14154225		2096.18	0.16813639		2626.18	0.06919361		3156.17	0.11889035		3686.17	0.07543869		4216.17	0.21357093
506.4	0.05348929		1036.39	0.01814427		1566.39	0.14081939		2096.38	0.16775334		2626.38	0.06924326		3156.37	0.11883124		3686.37	0.0753095		4216.37	0.21317559
506.6	0.05389947		1036.59	0.01724556		1566.59	0.14117248		2096.58	0.16875414		2626.58	0.07004785		3156.57	0.11889274		3686.57	0.07599272		4216.57	0.21375124
506.8	0.05344591		1036.79	0.01728055		1566.79	0.14127469		2096.78	0.16910827		2626.78	0.06961348		3156.77	0.11862662		3686.77	0.07607806		4216.77	0.21394403
507	0.05455993		1036.99	0.01794608		1566.99	0.14091854		2096.98	0.16935101		2626.98	0.06982629		3156.97	0.118861		3686.97	0.07499456		4216.97	0.21336386
507.2	0.05435411		1037.19	0.01958198		1567.19	0.14091046		2097.18	0.16942583		2627.18	0.069972		3157.17	0.11874937		3687.17	0.0749967		4217.17	0.21330571
507.4	0.05516053		1037.39	0.01985433		1567.39	0.14053407		2097.38	0.16921302		2627.38	0.06969354		3157.37	0.1181445		3687.37	0.07412881		4217.37	0.21195442
507.6	0.05535456		1037.59	0.02063505		1567.59	0.14072271		2097.58	0.16968641		2627.58	0.0700538		3157.57	0.11783716		3687.57	0.07312514		4217.57	0.21178808
507.8	0.05518008		1037.79	0.02006125		1567.79	0.14038407		2097.78	0.17004411		2627.78	0.07012986		3157.77	0.11798212		3687.77	0.07246025		4217.77	0.2121618
508	0.05500131		1037.99	0.02094314		1567.99	0.14032934		2097.98	0.17021346		2627.98	0.07009721		3157.97	0.11778088		3687.97	0.07152987		4217.97	0.21200775
508.2	0.05441287		1038.19	0.02116076		1568.19	0.14102704		2098.18	0.17108927		2628.18	0.07020994		3158.17	0.11883504		3688.17	0.0719856		4218.17	0.21195201
508.4	0.05417542		1038.39	0.02104274		1568.39	0.14048164		2098.38	0.17115922		2628.38	0.06963593		3158.37	0.11847727		3688.37	0.07151844		4218.37	0.21223695
508.6	0.05400085		1038.59	0.02077185		1568.59	0.14058226		2098.58	0.16992892		2628.58	0.06893835		3158.57	0.11911637		3688.57	0.07122309		4218.57	0.2116277
508.8	0.05272585		1038.79	0.02008534		1568.79	0.14226595		2098.78	0.16895704		2628.78	0.0692796		3158.77	0.11963193		3688.77	0.07164214		4218.77	0.21232671
509	0.05310799		1038.99	0.01928636		1568.99	0.14272233		2098.98	0.1682197		2628.98	0.0693508		3158.97	0.12064056		3688.97	0.07131843		4218.97	0.21139385
509.2	0.05210377		1039.19	0.01949972		1569.19	0.14210926		2099.18	0.16797707		2629.18	0.06871829		3159.17	0.12037922		3689.17	0.07227305		4219.17	0.21219699
509.4	0.05146368		1039.39	0.01954791		1569.39	0.1412857		2099.38	0.1680695		2629.38	0.06747689		3159.37	0.12040048		3689.37	0.07223784		4219.37	0.21213212
509.6	0.05121224		1039.59	0.01992948		1569.59	0.14162722		2099.58	0.16791031		2629.58	0.06665217		3159.57	0.12051896		3689.57	0.07333199		4219.57	0.21251505
509.8	0.05148594		1039.79	0.02094488		1569.79	0.14225145		2099.78	0.16821863		2629.78	0.06685764		3159.77	0.1213042		3689.77	0.07308069		4219.77	0.21255052
510	0.05235534		1039.99	0.02046623		1569.99	0.14265389		2099.98	0.16926774		2629.98	0.06719606		3159.97	0.12129281		3689.97	0.0729052		4219.97	0.21214619
510.2	0.05202797		1040.19	0.02033915		1570.19	0.14380912		2100.18	0.16969958		2630.18	0.06883574		3160.17	0.12114677		3690.17	0.07349644		4220.17	0.2118725
510.4	0.05210993		1040.39	0.02002773		1570.39	0.14339798		2100.38	0.1703487		2630.38	0.06978712		3160.37	0.12187598		3690.37	0.07294798		4220.37	0.21264988
510.6	0.05292044		1040.59	0.02026671		1570.59	0.14384859		2100.58	0.17126844		2630.58	0.07030449		3160.57	0.12241369		3690.57	0.07371667		4220.57	0.21268019
510.8	0.05276351		1040.79	0.02139242		1570.79	0.14335605		2100.78	0.1720861		2630.78	0.07064673		3160.77	0.12247223		3690.77	0.0734953		4220.77	0.21225867
511	0.0536049		1040.99	0.02249835		1570.99	0.14246138		2100.98	0.17202833		2630.98	0.07155102		3160.97	0.12292267		3690.97	0.07339992		4220.97	0.21183866
511.2	0.05298004		1041.19	0.02309154		1571.19	0.14243946		2101.18	0.17216812		2631.18	0.07205879		3161.17	0.12259173		3691.17	0.07378464		4221.17	0.21161559
511.4	0.05278828		1041.39	0.02248682		1571.39	0.14257254		2101.38	0.17182838		2631.38	0.07283558		3161.37	0.12231408		3691.37	0.07258226		4221.37	0.21233406
511.6	0.05265441		1041.59	0.02216062		1571.59	0.14246459		2101.58	0.17171882		2631.58	0.07387389		3161.57	0.12273192		3691.57	0.07206778		4221.57	0.21271328
511.8	0.05299073		1041.79	0.02225745		1571.79	0.14229935		2101.78	0.17163002		2631.78	0.07330429		3161.77	0.12346452		3691.77	0.07154256		4221.77	0.21347895
512	0.05308317		1041.99	0.02261059		1571.99	0.14219879		2101.98	0.17080843		2631.98	0.07317661		3161.97	0.12378239		3691.97	0.07136287		4221.97	0.21329242
512.2	0.05324526		1042.19	0.02178909		1572.19	0.14163261		2102.18	0.17095523		2632.18	0.07321902		3162.17	0.1242852		3692.17	0.0708052		4222.17	0.21343546
512.4	0.05273834		1042.39	0.02118219		1572.39	0.14137897		2102.38	0.17028732		2632.38	0.07325496		3162.37	0.12402555		3692.37	0.0699612		4222.37	0.21381889
512.6	0.05243417		1042.59	0.02014149		1572.59	0.14113866		2102.58	0.16983125		2632.58	0.07356214		3162.57	0.1244891		3692.57	0.06938991		4222.57	0.21328798
512.8	0.05237121		1042.79	0.0190389		1572.79	0.14085928		2102.78	0.16936034		2632.78	0.07358485		3162.77	0.1239086		3692.77	0.06886922		4222.77	0.21390206
513	0.05258788		1042.99	0.01854292		1572.99	0.1398882		2102.98	0.16889125		2632.98	0.07221429		3162.97	0.12347492		3692.97	0.06900015		4222.97	0.21339047
513.2	0.05232155		1043.19	0.01913738		1573.19	0.14039217		2103.18	0.16867724		2633.18	0.07132134		3163.17	0.12281605		3693.17	0.06916655		4223.17	0.21266379
513.4	0.05260126		1043.39	0.01843339		1573.39	0.13991078		2103.38	0.16784132		2633.38	0.07030922		3163.37	0.12276567		3693.37	0.06887057		4223.37	0.21201013
513.6	0.05325142		1043.59	0.01927966		1573.59	0.14038445		2103.58	0.16671407		2633.58	0.06952206		3163.57	0.12249219		3693.57	0.0690804		4223.57	0.21260787
513.8	0.05374458		1043.79	0.01918986		1573.79	0.14049035		2103.78	0.16665212		2633.78	0.0690149		3163.77	0.12258032		3693.77	0.06846848		4223.77	0.2126397
514	0.05351778		1043.99	0.01866037		1573.99	0.14023813		2103.98	0.16627078		2633.98	0.06869791		3163.97	0.12249493		3693.97	0.06927524		4223.97	0.21212221
514.2	0.05410882		1044.19	0.01876319		1574.19	0.14029608		2104.18	0.16615395		2634.18	0.06873781		3164.17	0.12232532		3694.17	0.070151		4224.17	0.21165652
514.4	0.05409786		1044.39	0.01872934		1574.39	0.13945069		2104.38	0.16606882		2634.38	0.06889031		3164.37	0.12327473		3694.37	0.07054751		4224.37	0.21199545
514.6	0.05398145		1044.59	0.01859047		1574.59	0.13956485		2104.58	0.16565295		2634.58	0.06859797		3164.57	0.1224388		3694.57	0.07132233		4224.57	0.21146602
514.8	0.05317961		1044.79	0.01926996		1574.79	0.13937142		2104.78	0.16624989		2634.78	0.06901122		3164.77	0.12205352		3694.77	0.0715316		4224.77	0.21093726
515	0.05249021		1044.99	0.01951419		1574.99	0.13930139		2104.98	0.16561502		2634.98	0.06894499		3164.97	0.12288347		3694.97	0.07171937		4224.97	0.21073601
515.2	0.05191314		1045.19	0.01943026		1575.19	0.13985374		2105.18	0.1655463		2635.18	0.06932793		3165.17	0.12302213		3695.17	0.07210069		4225.17	0.2101538
515.4	0.05196151		1045.39	0.01985826		1575.39	0.14036967		2105.38	0.16568948		2635.38	0.06870542		3165.37	0.12273711		3695.37	0.07199807		4225.37	0.21062665
515.6	0.05192481		1045.59	0.02008772		1575.59	0.14009276		2105.58	0.16618919		2635.58	0.06835222		3165.57	0.12278122		3695.57	0.07238417		4225.57	0.21007931
515.8	0.05211115		1045.79	0.02046491		1575.79	0.14071933		2105.78	0.16706238		2635.78	0.06866201		3165.77	0.12273745		3695.77	0.07262905		4225.77	0.20976236
516	0.05192045		1045.99	0.01925008		1575.99	0.14070964		2105.98	0.16699049		2635.98	0.06974842		3165.97	0.12254265		3695.97	0.07314329		4225.97	0.20997409
516.2	0.05113988		1046.19	0.01984077		1576.19	0.14041044		2106.18	0.16830268		2636.18	0.07021537		3166.17	0.12148264		3696.17	0.07338808		4226.17	0.20906412
516.4	0.05029155		1046.39	0.02051502		1576.39	0.14132362		2106.38	0.16925106		2636.38	0.07138581		3166.37	0.12121957		3696.37	0.07294224		4226.37	0.20823749
516.6	0.05044062		1046.59	0.02039021		1576.59	0.14102687		2106.58	0.16962055		2636.58	0.07252088		3166.57	0.12119388		3696.57	0.07309191		4226.57	0.20761755
516.8	0.0502725		1046.79	0.02000861		1576.79	0.14125306		2106.78	0.16993188		2636.78	0.07251209		3166.77	0.12026183		3696.77	0.07303766		4226.77	0.20775283
517	0.05080831		1046.99	0.02028152		1576.99	0.14224732		2106.98	0.17010724		2636.98	0.07192046		3166.97	0.12060405		3696.97	0.07444151		4226.97	0.20697956
517.2	0.05207225		1047.19	0.02019417		1577.19	0.14204717		2107.18	0.16949657		2637.18	0.07267497		3167.17	0.12048964		3697.17	0.07482719		4227.17	0.20631648
517.4	0.05252312		1047.39	0.01885679		1577.39	0.14135491		2107.38	0.16839081		2637.38	0.07249145		3167.37	0.11972068		3697.37	0.07479119		4227.37	0.2070924
517.6	0.05350035		1047.59	0.01884935		1577.59	0.14189503		2107.58	0.16856786		2637.58	0.0717902		3167.57	0.12052066		3697.57	0.07418473		4227.57	0.20718838
517.8	0.05362308		1047.79	0.01815416		1577.79	0.14218326		2107.78	0.16849757		2637.78	0.07160708		3167.77	0.12168038		3697.77	0.07401599		4227.77	0.20703249
518	0.05352527		1047.99	0.01811431		1577.99	0.14176765		2107.98	0.16845997		2637.98	0.07197414		3167.97	0.12240715		3697.97	0.07397238		4227.97	0.20756176
518.2	0.05363496		1048.19	0.01774453		1578.19	0.14171932		2108.18	0.16819457		2638.18	0.0723489		3168.17	0.12317807		3698.17	0.07378864		4228.17	0.20846159
518.4	0.05300498		1048.39	0.01724315		1578.39	0.14138286		2108.38	0.16822493		2638.38	0.07196582		3168.37	0.12395926		3698.37	0.07366311		4228.37	0.20906175
518.6	0.05304804		1048.59	0.01712454		1578.59	0.14135702		2108.58	0.1680368		2638.58	0.07189659		3168.57	0.12305564		3698.57	0.07410062		4228.57	0.2090553
518.8	0.0526956		1048.79	0.01689998		1578.79	0.14078927		2108.78	0.16833211		2638.78	0.07184647		3168.77	0.12383985		3698.77	0.0731195		4228.77	0.20981875
519	0.05247043		1048.99	0.01701276		1578.99	0.14098386		2108.98	0.16799033		2638.98	0.07130778		3168.97	0.12463249		3698.97	0.07286518		4228.97	0.21021286
519.2	0.05263118		1049.19	0.0170054		1579.19	0.14109226		2109.18	0.16845486		2639.18	0.07079772		3169.17	0.12368892		3699.17	0.07274447		4229.17	0.21036939
519.4	0.05273217		1049.39	0.01771749		1579.39	0.14168344		2109.38	0.16968017		2639.38	0.06934707		3169.37	0.12321204		3699.37	0.07153059		4229.37	0.21037718
519.6	0.05210908		1049.59	0.01772195		1579.59	0.14138891		2109.58	0.17089992		2639.58	0.06889101		3169.57	0.12364204		3699.57	0.07127719		4229.57	0.21038382
519.8	0.05223858		1049.79	0.01777078		1579.79	0.14121474		2109.78	0.17240367		2639.78	0.06844501		3169.77	0.1227075		3699.77	0.07175128		4229.77	0.21040394
520	0.05188374		1049.99	0.01759307		1579.99	0.14074924		2109.98	0.17319034		2639.98	0.06843034		3169.97	0.1217209		3699.97	0.07136151		4229.97	0.21082825
520.2	0.051919		1050.19	0.01827864		1580.19	0.14137714		2110.18	0.17430302		2640.18	0.06746852		3170.17	0.12029952		3700.17	0.07142324		4230.17	0.21038624
520.4	0.05207545		1050.39	0.01865079		1580.39	0.14181179		2110.38	0.17484755		2640.38	0.06819284		3170.37	0.12036296		3700.37	0.07109781		4230.37	0.21013817
520.6	0.05187521		1050.59	0.01834805		1580.59	0.14195427		2110.58	0.1746228		2640.58	0.06769371		3170.57	0.11927519		3700.57	0.07217228		4230.57	0.21031164
520.8	0.05286681		1050.79	0.01854538		1580.79	0.14207741		2110.78	0.17482686		2640.78	0.06753146		3170.77	0.11856982		3700.77	0.07284558		4230.77	0.21071986
521	0.05307604		1050.99	0.01966785		1580.99	0.14169217		2110.98	0.1741172		2640.98	0.06819118		3170.97	0.11829734		3700.97	0.07355426		4230.97	0.21003188
521.2	0.05201798		1051.19	0.01982761		1581.19	0.1409305		2111.18	0.17332069		2641.18	0.06869109		3171.17	0.11800388		3701.17	0.07310459		4231.17	0.20995198
521.4	0.05146525		1051.39	0.01923928		1581.39	0.14196862		2111.38	0.17329954		2641.38	0.06902564		3171.37	0.11801681		3701.37	0.07270861		4231.37	0.21038805
521.6	0.05122708		1051.59	0.01935046		1581.59	0.14239104		2111.58	0.17287806		2641.58	0.0692287		3171.57	0.11939671		3701.57	0.07198369		4231.57	0.2105315
521.8	0.05016693		1051.79	0.0197323		1581.79	0.14243546		2111.78	0.17149439		2641.78	0.0704371		3171.77	0.11961906		3701.77	0.07189532		4231.77	0.21165551
522	0.04974629		1051.99	0.01914195		1581.99	0.14261783		2111.98	0.17108062		2641.98	0.07124126		3171.97	0.11959676		3701.97	0.0719565		4231.97	0.21180253
522.2	0.04828305		1052.19	0.01867462		1582.19	0.14260339		2112.18	0.17039948		2642.18	0.07174725		3172.17	0.11945123		3702.17	0.07247112		4232.17	0.21158882
522.4	0.04815026		1052.39	0.01858328		1582.39	0.14272464		2112.38	0.17013421		2642.38	0.07161573		3172.37	0.11978493		3702.37	0.07252997		4232.37	0.21218909
522.6	0.04802896		1052.59	0.0178784		1582.59	0.14225885		2112.58	0.16929174		2642.58	0.0721816		3172.57	0.11970486		3702.57	0.0722026		4232.57	0.21183998
522.8	0.04785171		1052.79	0.01750565		1582.79	0.14194888		2112.78	0.16810555		2642.78	0.07230448		3172.77	0.12019373		3702.77	0.07116381		4232.77	0.21196444
523	0.04720111		1052.99	0.01744509		1582.99	0.14178588		2112.98	0.16812273		2642.98	0.07169595		3172.97	0.12026654		3702.97	0.07172048		4232.97	0.21129725
523.2	0.04734757		1053.19	0.01630283		1583.19	0.14150608		2113.18	0.168239		2643.18	0.07113665		3173.17	0.12052072		3703.17	0.07101428		4233.17	0.21123118
523.4	0.04782279		1053.39	0.01616137		1583.39	0.14063162		2113.38	0.16875367		2643.38	0.06981212		3173.37	0.12158677		3703.37	0.07059851		4233.37	0.21062576
523.6	0.0487544		1053.59	0.01565699		1583.59	0.13972364		2113.58	0.1689477		2643.58	0.06927533		3173.57	0.12226792		3703.57	0.0712072		4233.57	0.21063729
523.8	0.05001714		1053.79	0.01477476		1583.79	0.13924784		2113.78	0.1695577		2643.78	0.06817535		3173.77	0.12131073		3703.77	0.07213637		4233.77	0.21068411
524	0.0514429		1053.99	0.01425414		1583.99	0.13918539		2113.98	0.17009157		2643.98	0.06786764		3173.97	0.12112407		3703.97	0.07195055		4233.97	0.21122852
524.2	0.05290511		1054.19	0.01393426		1584.19	0.13926913		2114.18	0.17005542		2644.18	0.06716603		3174.17	0.12058008		3704.17	0.07284108		4234.17	0.21018362
524.4	0.0534548		1054.39	0.01484028		1584.39	0.13906684		2114.38	0.17035874		2644.38	0.06736715		3174.37	0.1210994		3704.37	0.0731038		4234.37	0.209396
524.6	0.05381098		1054.59	0.01517302		1584.59	0.13951312		2114.58	0.1707838		2644.58	0.06733494		3174.57	0.12126986		3704.57	0.07345093		4234.57	0.20917542
524.8	0.05494424		1054.79	0.01559285		1584.79	0.13972508		2114.78	0.17140402		2644.78	0.06752953		3174.77	0.12059967		3704.77	0.07362746		4234.77	0.20918172
525	0.0544694		1054.99	0.01531653		1584.99	0.1394587		2114.98	0.1708434		2644.98	0.06806569		3174.97	0.12047485		3704.97	0.07315583		4234.97	0.20891064
525.2	0.05369689		1055.19	0.01479639		1585.19	0.14080386		2115.18	0.17016898		2645.18	0.06760931		3175.17	0.12081928		3705.17	0.07302512		4235.17	0.20977258
525.4	0.05391907		1055.39	0.01380051		1585.39	0.14169278		2115.38	0.1694065		2645.38	0.06745936		3175.37	0.12075154		3705.37	0.0724306		4235.37	0.21054125
525.6	0.05406113		1055.59	0.0132001		1585.59	0.14213853		2115.58	0.16876205		2645.58	0.06803091		3175.57	0.12001461		3705.57	0.07187679		4235.57	0.21113722
525.8	0.05340729		1055.79	0.01298427		1585.79	0.142547		2115.78	0.17009463		2645.78	0.06882605		3175.77	0.11919506		3705.77	0.07226909		4235.77	0.21047687
526	0.05284029		1055.99	0.01262596		1585.99	0.14335186		2115.98	0.1708339		2645.98	0.06908618		3175.97	0.11921152		3705.97	0.07175104		4235.97	0.21004619
526.2	0.05162688		1056.19	0.01281271		1586.19	0.14324134		2116.18	0.17092367		2646.18	0.06851555		3176.17	0.11919207		3706.17	0.07126213		4236.17	0.20952548
526.4	0.0513532		1056.39	0.01357612		1586.39	0.14335773		2116.38	0.17107003		2646.38	0.06848901		3176.37	0.11990126		3706.37	0.07036472		4236.37	0.20934302
526.6	0.05107979		1056.59	0.01362678		1586.59	0.1431557		2116.58	0.17049173		2646.58	0.06916652		3176.57	0.1195685		3706.57	0.07040301		4236.57	0.20894412
526.8	0.05042263		1056.79	0.01436313		1586.79	0.14319542		2116.78	0.16926734		2646.78	0.06897055		3176.77	0.11900314		3706.77	0.06987419		4236.77	0.20938295
527	0.04944558		1056.99	0.01505361		1586.99	0.14302457		2116.98	0.16923836		2646.98	0.06970009		3176.97	0.11913788		3706.97	0.07030511		4236.97	0.20922508
527.2	0.04972963		1057.19	0.01492772		1587.19	0.14263673		2117.18	0.16877337		2647.18	0.06994687		3177.17	0.11980526		3707.17	0.07029485		4237.17	0.20920986
527.4	0.049804		1057.39	0.01554881		1587.39	0.1426542		2117.38	0.16892154		2647.38	0.06931643		3177.37	0.12010564		3707.37	0.07023226		4237.37	0.20903832
527.6	0.05043063		1057.59	0.0161543		1587.59	0.14366805		2117.58	0.16884957		2647.58	0.06861119		3177.57	0.12009285		3707.57	0.07140534		4237.57	0.20966634
527.8	0.05006116		1057.79	0.01726723		1587.79	0.14286077		2117.78	0.16910211		2647.78	0.06822606		3177.77	0.11972438		3707.77	0.07194347		4237.77	0.20947572
528	0.05021795		1057.99	0.01915521		1587.99	0.14312061		2117.98	0.16905357		2647.98	0.06891143		3177.97	0.11979458		3707.97	0.07250625		4237.97	0.21016237
528.2	0.04996775		1058.19	0.01977362		1588.19	0.14255722		2118.18	0.16867123		2648.18	0.0700937		3178.17	0.11942395		3708.17	0.07316553		4238.17	0.20870311
528.4	0.04994822		1058.39	0.02122365		1588.39	0.14200721		2118.38	0.16867896		2648.38	0.07016043		3178.37	0.11983015		3708.37	0.0725329		4238.37	0.20877199
528.6	0.0506125		1058.59	0.02133617		1588.59	0.14248091		2118.58	0.16877243		2648.58	0.07049335		3178.57	0.12003849		3708.57	0.07292778		4238.57	0.20904324
528.8	0.05116985		1058.79	0.02170901		1588.79	0.1422988		2118.78	0.16893771		2648.78	0.07024772		3178.77	0.12013289		3708.77	0.07368638		4238.77	0.20892267
529	0.05083935		1058.99	0.02136735		1588.99	0.14228149		2118.98	0.16866032		2648.98	0.07074529		3178.97	0.12134161		3708.97	0.07409798		4238.97	0.20936959
529.2	0.05039196		1059.19	0.02124714		1589.19	0.14265754		2119.18	0.16824721		2649.18	0.06999434		3179.17	0.12148216		3709.17	0.07415289		4239.17	0.2096028
529.4	0.05106788		1059.39	0.02040757		1589.39	0.14207512		2119.38	0.1682633		2649.38	0.06984648		3179.37	0.12085112		3709.37	0.0744584		4239.37	0.20916606
529.6	0.0509626		1059.59	0.01954846		1589.59	0.14136345		2119.58	0.16902792		2649.58	0.0704049		3179.57	0.12040613		3709.57	0.07437975		4239.57	0.20882989
529.8	0.05030774		1059.79	0.01989878		1589.79	0.14047516		2119.78	0.17021845		2649.78	0.07110032		3179.77	0.12051937		3709.77	0.07456969		4239.77	0.20812244
530	0.05002861		1059.99	0.01954145		1589.99	0.14004234		2119.98	0.16909066		2649.98	0.07084032		3179.97	0.12101925		3709.97	0.07447828		4239.97	0.20734675
530.2	0.04988959		1060.19	0.01943862		1590.19	0.13964538		2120.18	0.16900607		2650.18	0.07056929		3180.17	0.12136113		3710.17	0.07462967		4240.17	0.20647424
530.4	0.04974311		1060.39	0.01966085		1590.39	0.1390677		2120.38	0.16856682		2650.38	0.07070292		3180.37	0.12149953		3710.37	0.07423645		4240.37	0.20665472
530.6	0.04959468		1060.59	0.019347		1590.59	0.13878873		2120.58	0.1680416		2650.58	0.0711532		3180.57	0.12096757		3710.57	0.07411306		4240.57	0.2067139
530.8	0.04805812		1060.79	0.01844559		1590.79	0.13848877		2120.78	0.16720102		2650.78	0.07056625		3180.77	0.12103168		3710.77	0.07313725		4240.77	0.20669196
531	0.04803341		1060.99	0.01848789		1590.99	0.13863515		2120.98	0.16701752		2650.98	0.0711087		3180.97	0.12197616		3710.97	0.07293373		4240.97	0.20597783
531.2	0.04862652		1061.19	0.01772027		1591.19	0.13914263		2121.18	0.16683025		2651.18	0.07094724		3181.17	0.12202953		3711.17	0.07251831		4241.17	0.206553
531.4	0.04795998		1061.39	0.01661931		1591.39	0.13996754		2121.38	0.16687368		2651.38	0.07000721		3181.37	0.12214956		3711.37	0.07200295		4241.37	0.20724128
531.6	0.04828607		1061.59	0.01697638		1591.59	0.13970794		2121.58	0.16631597		2651.58	0.06942972		3181.57	0.12246716		3711.57	0.07204765		4241.57	0.20775494
531.8	0.04736826		1061.79	0.01756889		1591.79	0.13938091		2121.78	0.16605779		2651.78	0.06994888		3181.77	0.12226599		3711.77	0.0713414		4241.77	0.20828586
532	0.04715637		1061.99	0.01826428		1591.99	0.14002034		2121.98	0.16625122		2651.98	0.07051817		3181.97	0.12202248		3711.97	0.07073322		4241.97	0.20889279
532.2	0.0472993		1062.19	0.01749474		1592.19	0.13969907		2122.18	0.16643013		2652.18	0.0704341		3182.17	0.12179564		3712.17	0.07002724		4242.17	0.20815033
532.4	0.04695416		1062.39	0.01818633		1592.39	0.13992737		2122.38	0.16713116		2652.38	0.06954205		3182.37	0.1228818		3712.37	0.068896		4242.37	0.20788039
532.6	0.04740435		1062.59	0.01779667		1592.59	0.14120026		2122.58	0.16785075		2652.58	0.06944187		3182.57	0.12341437		3712.57	0.06911835		4242.57	0.20866249
532.8	0.04750985		1062.79	0.01773757		1592.79	0.14149587		2122.78	0.16889144		2652.78	0.06859924		3182.77	0.12412909		3712.77	0.06868607		4242.77	0.20910484
533	0.04725693		1062.99	0.01693831		1592.99	0.14256033		2122.98	0.16864319		2652.98	0.06834101		3182.97	0.12332272		3712.97	0.06899295		4242.97	0.2095653
533.2	0.04768459		1063.19	0.01703732		1593.19	0.14280217		2123.18	0.16735029		2653.18	0.06710339		3183.17	0.12285951		3713.17	0.06889984		4243.17	0.20915895
533.4	0.04864892		1063.39	0.0171445		1593.39	0.14275931		2123.38	0.16754157		2653.38	0.06678601		3183.37	0.12246485		3713.37	0.06940981		4243.37	0.20866955
533.6	0.0484807		1063.59	0.01763653		1593.59	0.14213307		2123.58	0.1677139		2653.58	0.06678695		3183.57	0.12185372		3713.57	0.06928846		4243.57	0.20910033
533.8	0.04868175		1063.79	0.01817739		1593.79	0.14164725		2123.78	0.16775272		2653.78	0.06722529		3183.77	0.1211859		3713.77	0.06981837		4243.77	0.20912948
534	0.04882631		1063.99	0.01769243		1593.99	0.14129423		2123.98	0.16750115		2653.98	0.0673941		3183.97	0.12070238		3713.97	0.0696924		4243.97	0.20848314
534.2	0.04825499		1064.19	0.01787007		1594.19	0.14116		2124.18	0.16778402		2654.18	0.06789883		3184.17	0.12066006		3714.17	0.06899958		4244.17	0.2085876
534.4	0.0485098		1064.39	0.01747486		1594.39	0.14063169		2124.38	0.16757649		2654.38	0.06769194		3184.37	0.11976508		3714.37	0.06841591		4244.37	0.2080629
534.6	0.04856692		1064.59	0.01736809		1594.59	0.14039475		2124.58	0.16769311		2654.58	0.06893707		3184.57	0.11975169		3714.57	0.06850867		4244.57	0.20712765
534.8	0.04886441		1064.79	0.01694703		1594.79	0.14037196		2124.78	0.168258		2654.78	0.06939631		3184.77	0.12044287		3714.77	0.06903467		4244.77	0.20794806
535	0.04988778		1064.99	0.01758676		1594.99	0.14012302		2124.98	0.16859812		2654.98	0.07033871		3184.97	0.1207378		3714.97	0.06895895		4244.97	0.20806813
535.2	0.05013232		1065.19	0.0165777		1595.19	0.13977105		2125.18	0.1685271		2655.18	0.07114159		3185.17	0.12005615		3715.17	0.06968589		4245.17	0.20885157
535.4	0.05019889		1065.39	0.01631928		1595.39	0.13916284		2125.38	0.16873901		2655.38	0.07053483		3185.37	0.12054493		3715.37	0.07000034		4245.37	0.20878002
535.6	0.0503984		1065.59	0.01663909		1595.59	0.13860766		2125.58	0.16836409		2655.58	0.0708003		3185.57	0.12106911		3715.57	0.06990932		4245.57	0.20833553
535.8	0.04959132		1065.79	0.0164954		1595.79	0.13925277		2125.78	0.16847348		2655.78	0.0711264		3185.77	0.12092557		3715.77	0.07045746		4245.77	0.20834402
536	0.049766		1065.99	0.0170176		1595.99	0.13866287		2125.98	0.16858559		2655.98	0.0709433		3185.97	0.12138242		3715.97	0.07037819		4245.97	0.20750068
536.2	0.05020581		1066.19	0.01556361		1596.19	0.1388774		2126.18	0.16859528		2656.18	0.07056107		3186.17	0.12217438		3716.17	0.07111392		4246.17	0.20771962
536.4	0.04979717		1066.39	0.01571865		1596.39	0.13952606		2126.38	0.16931084		2656.38	0.06919541		3186.37	0.12235167		3716.37	0.07062739		4246.37	0.20805736
536.6	0.05049784		1066.59	0.01490928		1596.59	0.13923771		2126.58	0.16919537		2656.58	0.06913776		3186.57	0.12264141		3716.57	0.07077368		4246.57	0.20867587
536.8	0.05116813		1066.79	0.01509541		1596.79	0.1397188		2126.78	0.16954458		2656.78	0.06836486		3186.77	0.12290944		3716.77	0.07104185		4246.77	0.20880244
537	0.0513386		1066.99	0.01508996		1596.99	0.14053941		2126.98	0.16927236		2656.98	0.06761899		3186.97	0.12246043		3716.97	0.07210134		4246.97	0.20834049
537.2	0.05132034		1067.19	0.01487445		1597.19	0.14079117		2127.18	0.16843624		2657.18	0.06716949		3187.17	0.12263644		3717.17	0.07199283		4247.17	0.20800287
537.4	0.05165103		1067.39	0.01416867		1597.39	0.14055629		2127.38	0.16916228		2657.38	0.06596765		3187.37	0.12240778		3717.37	0.07145628		4247.37	0.20834956
537.6	0.0510882		1067.59	0.01363661		1597.59	0.14047157		2127.58	0.16935781		2657.58	0.06640021		3187.57	0.12220996		3717.57	0.07074581		4247.57	0.20888021
537.8	0.05060825		1067.79	0.01369979		1597.79	0.1403135		2127.78	0.16932805		2657.78	0.06636544		3187.77	0.12184445		3717.77	0.07030975		4247.77	0.20868555
538	0.05017364		1067.99	0.01265762		1597.99	0.14046508		2127.98	0.17003736		2657.98	0.0660751		3187.97	0.12191436		3717.97	0.06924666		4247.97	0.20826326
538.2	0.05004559		1068.19	0.01257605		1598.19	0.14058118		2128.18	0.17034319		2658.18	0.06621113		3188.17	0.12196546		3718.17	0.06931097		4248.17	0.20798518
538.4	0.05071753		1068.39	0.01255615		1598.39	0.14093392		2128.38	0.17036798		2658.38	0.06650525		3188.37	0.12119185		3718.37	0.06919386		4248.37	0.20693226
538.6	0.05054055		1068.59	0.01297108		1598.59	0.14117545		2128.58	0.16964696		2658.58	0.06754248		3188.57	0.1217419		3718.57	0.06901054		4248.57	0.20648727
538.8	0.05058698		1068.79	0.01357794		1598.79	0.14143514		2128.78	0.17034609		2658.78	0.06748718		3188.77	0.12229314		3718.77	0.0691217		4248.77	0.20742487
539	0.05044755		1068.99	0.01410687		1598.99	0.14140293		2128.98	0.16961738		2658.98	0.06739789		3188.97	0.12191357		3718.97	0.06988349		4248.97	0.20697038
539.2	0.04989026		1069.19	0.014361		1599.19	0.14205752		2129.18	0.16873031		2659.18	0.06762505		3189.17	0.12102164		3719.17	0.06998526		4249.17	0.2068462
539.4	0.04891018		1069.39	0.01502068		1599.39	0.14185955		2129.38	0.16812241		2659.38	0.0676031		3189.37	0.12212017		3719.37	0.0704336		4249.37	0.20591112
539.6	0.04895348		1069.59	0.01555305		1599.59	0.14210578		2129.58	0.16707055		2659.58	0.06804515		3189.57	0.12130282		3719.57	0.07132214		4249.57	0.20611747
539.8	0.04893284		1069.79	0.01642142		1599.79	0.14222335		2129.78	0.16644779		2659.78	0.06837257		3189.77	0.12142385		3719.77	0.07192941		4249.77	0.20690163
540	0.04937753		1069.99	0.01644649		1599.99	0.14198219		2129.98	0.16579669		2659.98	0.06862463		3189.97	0.12139553		3719.97	0.07175209		4249.97	0.2065717
540.2	0.04950167		1070.19	0.01616339		1600.19	0.1429163		2130.18	0.16602982		2660.18	0.06832637		3190.17	0.12080888		3720.17	0.07191178		4250.17	0.20721196
540.4	0.04905835		1070.39	0.01703493		1600.39	0.14287773		2130.38	0.1666027		2660.38	0.06868971		3190.37	0.1196085		3720.37	0.07260579		4250.37	0.20789506
540.6	0.04880066		1070.59	0.01721441		1600.59	0.14260539		2130.58	0.16656865		2660.58	0.07036233		3190.57	0.11949102		3720.57	0.07257943		4250.57	0.20800206
540.8	0.04911508		1070.79	0.01746855		1600.79	0.14312439		2130.78	0.1664315		2660.78	0.07126826		3190.77	0.11967402		3720.77	0.07306775		4250.77	0.20866165
541	0.04885765		1070.99	0.01741682		1600.99	0.14307483		2130.98	0.16600141		2660.98	0.07150147		3190.97	0.11949314		3720.97	0.0727483		4250.97	0.20903579
541.2	0.04897282		1071.19	0.01707875		1601.19	0.14295517		2131.18	0.16519451		2661.18	0.07223309		3191.17	0.11958772		3721.17	0.07180278		4251.17	0.21006977
541.4	0.04908566		1071.39	0.01695375		1601.39	0.14226944		2131.38	0.16582752		2661.38	0.07237556		3191.37	0.11986609		3721.37	0.07120364		4251.37	0.21052759
541.6	0.04856469		1071.59	0.01718892		1601.59	0.14160611		2131.58	0.1663205		2661.58	0.07379656		3191.57	0.12053668		3721.57	0.07103638		4251.57	0.21049198
541.8	0.04819345		1071.79	0.01770143		1601.79	0.1408469		2131.78	0.16645355		2661.78	0.07342096		3191.77	0.1206204		3721.77	0.07065465		4251.77	0.21073851
542	0.0478075		1071.99	0.0166927		1601.99	0.1408034		2131.98	0.1671721		2661.98	0.07309806		3191.97	0.12058683		3721.97	0.06949356		4251.97	0.21053977
542.2	0.04869797		1072.19	0.01729493		1602.19	0.14076082		2132.18	0.16728116		2662.18	0.07362279		3192.17	0.1204712		3722.17	0.06934025		4252.17	0.21084193
542.4	0.04923517		1072.39	0.01725604		1602.39	0.14106054		2132.38	0.1671262		2662.38	0.07206915		3192.37	0.12052493		3722.37	0.06826677		4252.37	0.21024183
542.6	0.0484627		1072.59	0.01789474		1602.59	0.14130012		2132.58	0.16742055		2662.58	0.07159616		3192.57	0.12105757		3722.57	0.06804133		4252.57	0.20988607
542.8	0.04857872		1072.79	0.01786902		1602.79	0.14136999		2132.78	0.16905637		2662.78	0.07036563		3192.77	0.12147777		3722.77	0.06853886		4252.77	0.21060353
543	0.04861324		1072.99	0.01769355		1602.99	0.14216319		2132.98	0.16944799		2662.98	0.06945765		3192.97	0.12136356		3722.97	0.06931331		4252.97	0.21011627
543.2	0.04762735		1073.19	0.01798952		1603.19	0.14223827		2133.18	0.16946628		2663.18	0.06841556		3193.17	0.12103124		3723.17	0.06897474		4253.17	0.21045418
543.4	0.0482144		1073.39	0.01761933		1603.39	0.14234332		2133.38	0.16977947		2663.38	0.06720598		3193.37	0.12176062		3723.37	0.07060405		4253.37	0.20971575
543.6	0.04905564		1073.59	0.0178776		1603.59	0.14285121		2133.58	0.17056986		2663.58	0.06705724		3193.57	0.12142678		3723.57	0.07116385		4253.57	0.21094393
543.8	0.04923069		1073.79	0.01759069		1603.79	0.14304822		2133.78	0.17059788		2663.78	0.06599166		3193.77	0.12187502		3723.77	0.07120538		4253.77	0.21088329
544	0.04986096		1073.99	0.01595195		1603.99	0.14401587		2133.98	0.17035216		2663.98	0.06525853		3193.97	0.1210021		3723.97	0.07192289		4253.97	0.21064266
544.2	0.04948636		1074.19	0.01595028		1604.19	0.14415796		2134.18	0.17008646		2664.18	0.0646478		3194.17	0.11996597		3724.17	0.07272708		4254.17	0.21103238
544.4	0.04860014		1074.39	0.01537113		1604.39	0.14339441		2134.38	0.16982243		2664.38	0.06545257		3194.37	0.11938458		3724.37	0.07438149		4254.37	0.21080416
544.6	0.04830659		1074.59	0.01541146		1604.59	0.14373002		2134.58	0.16952534		2664.58	0.06520831		3194.57	0.11940807		3724.57	0.07407593		4254.57	0.20958456
544.8	0.04890876		1074.79	0.01517629		1604.79	0.14354364		2134.78	0.16922431		2664.78	0.06505716		3194.77	0.11962716		3724.77	0.0749576		4254.77	0.20946502
545	0.04914374		1074.99	0.01494757		1604.99	0.14301472		2134.98	0.16975547		2664.98	0.06488328		3194.97	0.11924594		3724.97	0.07476948		4254.97	0.21022283
545.2	0.04870496		1075.19	0.01430811		1605.19	0.14270192		2135.18	0.16957381		2665.18	0.06570839		3195.17	0.11941176		3725.17	0.07464305		4255.17	0.21002515
545.4	0.04757799		1075.39	0.01388887		1605.39	0.14234419		2135.38	0.17030527		2665.38	0.06640601		3195.37	0.11904382		3725.37	0.07458215		4255.37	0.20897268
545.6	0.04767933		1075.59	0.01368123		1605.59	0.14158746		2135.58	0.17050545		2665.58	0.06682667		3195.57	0.11917618		3725.57	0.07366468		4255.57	0.20856213
545.8	0.04769729		1075.79	0.01374462		1605.79	0.14147193		2135.78	0.17009769		2665.78	0.06630552		3195.77	0.11865832		3725.77	0.07303689		4255.77	0.20852042
546	0.04816787		1075.99	0.01303317		1605.99	0.14160747		2135.98	0.16955431		2665.98	0.06646065		3195.97	0.11850155		3725.97	0.07226282		4255.97	0.20796695
546.2	0.04777305		1076.19	0.0133005		1606.19	0.14183824		2136.18	0.16974095		2666.18	0.06684802		3196.17	0.11866785		3726.17	0.07209461		4256.17	0.20751011
546.4	0.04768684		1076.39	0.01349515		1606.39	0.14161153		2136.38	0.17003015		2666.38	0.06635078		3196.37	0.1195509		3726.37	0.07136515		4256.37	0.20679349
546.6	0.04669125		1076.59	0.01344465		1606.59	0.14082289		2136.58	0.17078711		2666.58	0.06694525		3196.57	0.1197705		3726.57	0.07110794		4256.57	0.20676348
546.8	0.04628097		1076.79	0.01293568		1606.79	0.1403476		2136.78	0.17086334		2666.78	0.06699428		3196.77	0.11997609		3726.77	0.0709286		4256.77	0.20739034
547	0.04630265		1076.99	0.01371852		1606.99	0.14019839		2136.98	0.17014267		2666.98	0.06691357		3196.97	0.12034434		3726.97	0.07011705		4256.97	0.20710651
547.2	0.04621815		1077.19	0.0142417		1607.19	0.13962937		2137.18	0.1696716		2667.18	0.06625978		3197.17	0.12065066		3727.17	0.06995794		4257.17	0.20815666
547.4	0.04646649		1077.39	0.0148132		1607.39	0.13977658		2137.38	0.16968203		2667.38	0.06744494		3197.37	0.12166166		3727.37	0.06980666		4257.37	0.20820168
547.6	0.04520029		1077.59	0.01486749		1607.59	0.13941156		2137.58	0.16870912		2667.58	0.06849003		3197.57	0.12253614		3727.57	0.06875955		4257.57	0.2094507
547.8	0.04539645		1077.79	0.01452539		1607.79	0.13938508		2137.78	0.16755392		2667.78	0.06875127		3197.77	0.12183183		3727.77	0.06937826		4257.77	0.20981984
548	0.04527712		1077.99	0.01372307		1607.99	0.1395997		2137.98	0.16642339		2667.98	0.06842413		3197.97	0.12204705		3727.97	0.0695654		4257.97	0.21000603
548.2	0.04492971		1078.19	0.01375243		1608.19	0.13876775		2138.18	0.1660529		2668.18	0.06814637		3198.17	0.12177648		3728.17	0.06879907		4258.17	0.20930701
548.4	0.04554877		1078.39	0.01419704		1608.39	0.13836879		2138.38	0.16594616		2668.38	0.06899097		3198.37	0.12190743		3728.37	0.06929973		4258.37	0.20908945
548.6	0.04678818		1078.59	0.0140596		1608.59	0.13918306		2138.58	0.16613562		2668.58	0.06867568		3198.57	0.12143754		3728.57	0.06922481		4258.57	0.20916905
548.8	0.04809169		1078.79	0.01395433		1608.79	0.13873228		2138.78	0.16642894		2668.78	0.06917099		3198.77	0.12085794		3728.77	0.06975271		4258.77	0.20945494
549	0.04839431		1078.99	0.01344198		1608.99	0.13878896		2138.98	0.16746875		2668.98	0.06891496		3198.97	0.12111696		3728.97	0.06996196		4258.97	0.21052909
549.2	0.04819265		1079.19	0.0139135		1609.19	0.1396451		2139.18	0.16769985		2669.18	0.06936354		3199.17	0.1212349		3729.17	0.06981846		4259.17	0.20957578
549.4	0.04879702		1079.39	0.01439952		1609.39	0.13942822		2139.38	0.16867686		2669.38	0.06902113		3199.37	0.12137226		3729.37	0.06936712		4259.37	0.20821475
549.6	0.04959158		1079.59	0.01375539		1609.59	0.13926384		2139.58	0.16870142		2669.58	0.06871376		3199.57	0.12141873		3729.57	0.06867869		4259.57	0.20782628
549.8	0.04976063		1079.79	0.01330528		1609.79	0.13951455		2139.78	0.16810534		2669.78	0.06848938		3199.77	0.12129044		3729.77	0.06842433		4259.77	0.20769673
550	0.04918019		1079.99	0.01254988		1609.99	0.14013217		2139.98	0.16813228		2669.98	0.06898529		3199.97	0.12097643		3729.97	0.06723233		4259.97	0.20664964
550.2	0.04856333		1080.19	0.01303445		1610.19	0.14060789		2140.18	0.16834195		2670.18	0.068842		3200.17	0.12017466		3730.17	0.06748365		4260.17	0.20625597
550.4	0.04930546		1080.39	0.01252858		1610.39	0.14027327		2140.38	0.16840616		2670.38	0.06924371		3200.37	0.11954448		3730.37	0.06767539		4260.37	0.20620342
550.6	0.04814311		1080.59	0.01184536		1610.59	0.13914722		2140.58	0.1684017		2670.58	0.068987		3200.57	0.11899743		3730.57	0.06725403		4260.57	0.20592625
550.8	0.04723181		1080.79	0.01252844		1610.79	0.13900567		2140.78	0.16754172		2670.78	0.06865876		3200.77	0.11877929		3730.77	0.06670323		4260.77	0.2054096
551	0.04706319		1080.99	0.01297243		1610.99	0.13901795		2140.98	0.16737341		2670.98	0.06799243		3200.97	0.11919189		3730.97	0.06630029		4260.97	0.20497752
551.2	0.04698694		1081.19	0.01241904		1611.19	0.13976182		2141.18	0.16779284		2671.18	0.06816807		3201.17	0.11900527		3731.17	0.06704593		4261.17	0.20588225
551.4	0.04559424		1081.39	0.01236196		1611.39	0.13974396		2141.38	0.16687632		2671.38	0.06932517		3201.37	0.11862976		3731.37	0.06683012		4261.37	0.2061307
551.6	0.04454588		1081.59	0.01171226		1611.59	0.13979597		2141.58	0.16691343		2671.58	0.06876827		3201.57	0.1187037		3731.57	0.06716692		4261.57	0.20608703
551.8	0.04478102		1081.79	0.01237069		1611.79	0.14045321		2141.78	0.16686064		2671.78	0.06882455		3201.77	0.11879916		3731.77	0.06750027		4261.77	0.20621223
552	0.04506495		1081.99	0.01322002		1611.99	0.14028965		2141.98	0.16588406		2671.98	0.06754085		3201.97	0.11859849		3731.97	0.06720995		4261.97	0.20610661
552.2	0.04567688		1082.19	0.01352729		1612.19	0.13965405		2142.18	0.16581139		2672.18	0.06843666		3202.17	0.1183778		3732.17	0.06704531		4262.17	0.2060659
552.4	0.04697982		1082.39	0.01405779		1612.39	0.13883356		2142.38	0.16554631		2672.38	0.06853451		3202.37	0.11892917		3732.37	0.0679554		4262.37	0.20654377
552.6	0.04698232		1082.59	0.01449655		1612.59	0.13816477		2142.58	0.16561344		2672.58	0.06830112		3202.57	0.11907526		3732.57	0.06913507		4262.57	0.20751202
552.8	0.04695308		1082.79	0.01547752		1612.79	0.13757649		2142.78	0.16584616		2672.78	0.0684611		3202.77	0.11919926		3732.77	0.06954886		4262.77	0.20777652
553	0.04605438		1082.99	0.01563304		1612.99	0.13819411		2142.98	0.1668794		2672.98	0.0680157		3202.97	0.11966017		3732.97	0.07005689		4262.97	0.20899998
553.2	0.0455604		1083.19	0.01578346		1613.19	0.13771066		2143.18	0.16713575		2673.18	0.06801526		3203.17	0.12076795		3733.17	0.07010915		4263.17	0.20924783
553.4	0.04527294		1083.39	0.01557663		1613.39	0.13720245		2143.38	0.16689497		2673.38	0.06737219		3203.37	0.12123949		3733.37	0.0700643		4263.37	0.20964938
553.6	0.04492716		1083.59	0.01416635		1613.59	0.137895		2143.58	0.16662554		2673.58	0.06796619		3203.57	0.12115771		3733.57	0.06922941		4263.57	0.21042942
553.8	0.0446057		1083.79	0.01410899		1613.79	0.13881913		2143.78	0.16650832		2673.78	0.06759296		3203.77	0.12077953		3733.77	0.06899001		4263.77	0.21116003
554	0.04392993		1083.99	0.01339834		1613.99	0.13942222		2143.98	0.16772487		2673.98	0.06787339		3203.97	0.12044127		3733.97	0.06805805		4263.97	0.21099596
554.2	0.04450731		1084.19	0.0134558		1614.19	0.13985031		2144.18	0.16778609		2674.18	0.06797332		3204.17	0.11938171		3734.17	0.06839334		4264.17	0.21145622
554.4	0.04388141		1084.39	0.01294625		1614.39	0.13953026		2144.38	0.1683336		2674.38	0.06892816		3204.37	0.11937947		3734.37	0.06820774		4264.37	0.21072205
554.6	0.04328953		1084.59	0.01281293		1614.59	0.13856873		2144.58	0.16873505		2674.58	0.06797943		3204.57	0.11956333		3734.57	0.06758543		4264.57	0.21013611
554.8	0.04353665		1084.79	0.01326368		1614.79	0.13910983		2144.78	0.16891511		2674.78	0.06785142		3204.77	0.11877919		3734.77	0.0678829		4264.77	0.20983486
555	0.04446847		1084.99	0.01255767		1614.99	0.1387681		2144.98	0.16883884		2674.98	0.06760904		3204.97	0.1185855		3734.97	0.06815679		4264.97	0.20975036
555.2	0.04492272		1085.19	0.01208028		1615.19	0.13925987		2145.18	0.16958059		2675.18	0.06805691		3205.17	0.11787245		3735.17	0.06881037		4265.17	0.21085706
555.4	0.04443429		1085.39	0.01289376		1615.39	0.13951247		2145.38	0.16922353		2675.38	0.06836681		3205.37	0.11835721		3735.37	0.06949239		4265.37	0.21063138
555.6	0.04523343		1085.59	0.01424556		1615.59	0.13987756		2145.58	0.16907621		2675.58	0.06807126		3205.57	0.11883575		3735.57	0.06937174		4265.57	0.20930358
555.8	0.0451891		1085.79	0.01553912		1615.79	0.13950103		2145.78	0.16783507		2675.78	0.06868091		3205.77	0.11877864		3735.77	0.06899043		4265.77	0.20891955
556	0.0464487		1085.99	0.01695702		1615.99	0.13840711		2145.98	0.16678089		2675.98	0.06830259		3205.97	0.11810078		3735.97	0.06998731		4265.97	0.20819908
556.2	0.04608815		1086.19	0.01675415		1616.19	0.1379725		2146.18	0.16719096		2676.18	0.06845634		3206.17	0.11851835		3736.17	0.07016064		4266.17	0.207757
556.4	0.04603311		1086.39	0.01665148		1616.39	0.13745496		2146.38	0.16581469		2676.38	0.0685239		3206.37	0.11866325		3736.37	0.07097031		4266.37	0.20761193
556.6	0.04503322		1086.59	0.01699287		1616.59	0.13831525		2146.58	0.16522101		2676.58	0.06876859		3206.57	0.1183155		3736.57	0.07118058		4266.57	0.20752162
556.8	0.04430827		1086.79	0.01682095		1616.79	0.13848506		2146.78	0.16498983		2676.78	0.0685942		3206.77	0.11783447		3736.77	0.07096251		4266.77	0.20656474
557	0.04413317		1086.99	0.01591639		1616.99	0.13950177		2146.98	0.16515785		2676.98	0.0683868		3206.97	0.11785764		3736.97	0.07100465		4266.97	0.20618414
557.2	0.04401828		1087.19	0.015677		1617.19	0.13969475		2147.18	0.16496494		2677.18	0.06767105		3207.17	0.11916532		3737.17	0.07076729		4267.17	0.20553721
557.4	0.04431496		1087.39	0.01492341		1617.39	0.14057559		2147.38	0.16487994		2677.38	0.06712932		3207.37	0.11959362		3737.37	0.0698887		4267.37	0.20530102
557.6	0.0447495		1087.59	0.01420129		1617.59	0.14174494		2147.58	0.1658048		2677.58	0.06656395		3207.57	0.12009646		3737.57	0.06836827		4267.57	0.20510578
557.8	0.04504852		1087.79	0.01385954		1617.79	0.14260219		2147.78	0.16581221		2677.78	0.06607845		3207.77	0.1202863		3737.77	0.0686267		4267.77	0.20510406
558	0.04577574		1087.99	0.01310485		1617.99	0.14297246		2147.98	0.16611788		2677.98	0.06650676		3207.97	0.12058409		3737.97	0.06808743		4267.97	0.20489936
558.2	0.04636117		1088.19	0.01323624		1618.19	0.14359509		2148.18	0.16585327		2678.18	0.06644713		3208.17	0.12011683		3738.17	0.06811479		4268.17	0.20487505
558.4	0.04634808		1088.39	0.01284757		1618.39	0.14355853		2148.38	0.1660265		2678.38	0.06632959		3208.37	0.12022499		3738.37	0.0682103		4268.37	0.20469787
558.6	0.04722965		1088.59	0.01242664		1618.59	0.14360055		2148.58	0.16635178		2678.58	0.06554514		3208.57	0.11965497		3738.57	0.06831465		4268.57	0.20507433
558.8	0.04772165		1088.79	0.01237058		1618.79	0.1438394		2148.78	0.16671268		2678.78	0.06555821		3208.77	0.11910333		3738.77	0.06818159		4268.77	0.20579618
559	0.0482299		1088.99	0.01204007		1618.99	0.14356224		2148.98	0.1670705		2678.98	0.06516881		3208.97	0.11919372		3738.97	0.06801787		4268.97	0.20664957
559.2	0.04830636		1089.19	0.01238625		1619.19	0.14410226		2149.18	0.16814281		2679.18	0.06546656		3209.17	0.11876263		3739.17	0.06843824		4269.17	0.20771071
559.4	0.04846178		1089.39	0.0133083		1619.39	0.14420811		2149.38	0.16811818		2679.38	0.06564124		3209.37	0.1186464		3739.37	0.0685326		4269.37	0.2077539
559.6	0.04868624		1089.59	0.01399819		1619.59	0.14355387		2149.58	0.16808501		2679.58	0.06539161		3209.57	0.11744475		3739.57	0.06766727		4269.57	0.20776774
559.8	0.04833351		1089.79	0.01423083		1619.79	0.14284557		2149.78	0.16861014		2679.78	0.06533028		3209.77	0.11667195		3739.77	0.06768322		4269.77	0.20827187
