# Supplementary material for: Functional development of a V3/glycan-specific broadly neutralizing antibody isolated from a case of HIV superinfection
Source: eLife journal article supplement (doi:10.7554/elife.68110), 2021-07-15
Supplement: fig4-data2 [file B3.xls]

Vers 3.43 Data Simulation
Conc1	2.5E-07	2.5E-07	2.5E-07	2.5E-07	2.5E-07	2.5E-07	2.5E-07	2.5E-07
Start1	200	729.99	1259.99	1789.99	2319.98	2849.98	3379.97	3909.97
Stop1	559.8	1089.79	1619.79	2149.78	2679.78	3209.77	3739.77	4269.77
Time1	Data1	Sim1	Time2	Data2	Sim2	Time3	Data3	Sim3	Time4	Data4	Sim4	Time5	Data5	Sim5	Time6	Data6	Sim6	Time7	Data7	Sim7	Time8	Data8	Sim8
200	0.00114884		729.99	0.01144205		1259.99	0.00834197		1789.99	0.00664644		2319.98	-0.00044461		2849.98	0.0038768		3379.97	0.00169276		3909.97	0.00655221
200.2	0.00145499		730.19	0.01214313		1260.19	0.00748197		1790.19	0.00702234		2320.18	-0.00107632		2850.18	0.00286935		3380.17	0.00267238		3910.17	0.00657747
200.4	0.00120764		730.39	0.01369513		1260.39	0.00716369		1790.39	0.00716578		2320.38	-0.00180067		2850.38	0.00178868		3380.37	0.00370363		3910.37	0.00635167
200.6	0.00113705		730.59	0.01445805		1260.59	0.0064719		1790.59	0.00691917		2320.58	-0.00221641		2850.58	0.00114944		3380.57	0.00455418		3910.57	0.00649643
200.8	0.00169297		730.79	0.01586938		1260.79	0.0060338		1790.79	0.00782231		2320.78	-0.00208986		2850.78	0.00000165		3380.77	0.00596844		3910.77	0.00650017
201	0.00206506		730.99	0.0165759		1260.99	0.00604346		1790.99	0.00836133		2320.98	-0.00192287		2850.98	-0.00001771		3380.97	0.00707079		3910.97	0.00654815
201.2	0.0020186		731.19	0.0172792		1261.19	0.00646759		1791.19	0.00923643		2321.18	-0.00169162		2851.18	0.00009251		3381.17	0.00821675		3911.17	0.00614166
201.4	0.00108977		731.39	0.01781603		1261.39	0.00635688		1791.39	0.01025556		2321.38	-0.00213995		2851.38	-0.00023873		3381.37	0.00887459		3911.37	0.0069098
201.6	0.00127899		731.59	0.01824063		1261.59	0.00727526		1791.59	0.01089361		2321.58	-0.00227121		2851.58	0.00005755		3381.57	0.00979262		3911.57	0.00638245
201.8	0.00170013		731.79	0.01887581		1261.79	0.00751398		1791.79	0.01050628		2321.78	-0.00228625		2851.78	0.00074324		3381.77	0.01040037		3911.77	0.0061493
202	0.0013445		731.99	0.01919782		1261.99	0.00799469		1791.99	0.0104754		2321.98	-0.00292308		2851.98	0.00100363		3381.97	0.01038429		3911.97	0.00581247
202.2	0.00149284		732.19	0.01956898		1262.19	0.0090987		1792.19	0.01075453		2322.18	-0.00221223		2852.18	0.00204693		3382.17	0.01029993		3912.17	0.00574861
202.4	0.00093194		732.39	0.0199416		1262.39	0.00869462		1792.39	0.01125197		2322.38	-0.00310893		2852.38	0.00329055		3382.37	0.0109963		3912.37	0.00584906
202.6	0.000854		732.59	0.01936441		1262.59	0.00824468		1792.59	0.01192663		2322.58	-0.00287972		2852.58	0.00374276		3382.57	0.01069034		3912.57	0.00546455
202.8	0.00006713		732.79	0.01906245		1262.79	0.00878886		1792.79	0.01189403		2322.78	-0.00278367		2852.78	0.00456868		3382.77	0.01109795		3912.77	0.00496918
203	0.00038555		732.99	0.01850624		1262.99	0.00996174		1792.99	0.01139323		2322.98	-0.0017165		2852.98	0.00593724		3382.97	0.01119284		3912.97	0.0055415
203.2	0.00026086		733.19	0.01781373		1263.19	0.01027215		1793.19	0.01150626		2323.18	-0.00204249		2853.18	0.00701821		3383.17	0.01151576		3913.17	0.005765
203.4	0.00060049		733.39	0.01803399		1263.39	0.00968451		1793.39	0.0120344		2323.38	-0.002001		2853.38	0.00659135		3383.37	0.0111354		3913.37	0.00645874
203.6	0.00091586		733.59	0.0185793		1263.59	0.00999334		1793.59	0.01123089		2323.58	-0.00219163		2853.58	0.00612615		3383.57	0.01088354		3913.57	0.00705381
203.8	0.00058891		733.79	0.01898498		1263.79	0.01042578		1793.79	0.01126138		2323.78	-0.00189508		2853.78	0.0060154		3383.77	0.01165145		3913.77	0.00738815
204	0.00065437		733.99	0.0190766		1263.99	0.01049794		1793.99	0.01183942		2323.98	-0.00163997		2853.98	0.00552334		3383.97	0.01244757		3913.97	0.00716658
204.2	0.00098347		734.19	0.01921985		1264.19	0.01031842		1794.19	0.01208787		2324.18	-0.00247153		2854.18	0.00525415		3384.17	0.01221208		3914.17	0.00789981
204.4	0.00056973		734.39	0.01952327		1264.39	0.01111373		1794.39	0.01178702		2324.38	-0.00201582		2854.38	0.00501971		3384.37	0.01234266		3914.37	0.00853642
204.6	0.00057823		734.59	0.01843522		1264.59	0.01108685		1794.59	0.01161255		2324.58	-0.00153268		2854.58	0.00520417		3384.57	0.01196842		3914.57	0.00883265
204.8	0.00084871		734.79	0.01893158		1264.79	0.01121834		1794.79	0.01197684		2324.78	-0.00101784		2854.78	0.0051977		3384.77	0.01186174		3914.77	0.00858926
205	0.00066966		734.99	0.01795903		1264.99	0.01121398		1794.99	0.01251299		2324.98	-0.00143981		2854.98	0.00553188		3384.97	0.01154728		3914.97	0.00897524
205.2	0.00012897		735.19	0.01817422		1265.19	0.01128654		1795.19	0.0123307		2325.18	-0.00172074		2855.18	0.00502226		3385.17	0.01111922		3915.17	0.00958991
205.4	-0.00000659		735.39	0.01752574		1265.39	0.01119904		1795.39	0.01200114		2325.38	-0.00198128		2855.38	0.00479347		3385.37	0.01098848		3915.37	0.00985839
205.6	0.00002496		735.59	0.01766556		1265.59	0.01190358		1795.59	0.01194277		2325.58	-0.00188072		2855.58	0.00519906		3385.57	0.01020639		3915.57	0.00917022
205.8	-0.00028853		735.79	0.01719369		1265.79	0.0112636		1795.79	0.01134764		2325.78	-0.00157765		2855.78	0.00511894		3385.77	0.009668		3915.77	0.00954727
206	-0.00111979		735.99	0.01644648		1265.99	0.01174323		1795.99	0.01187586		2325.98	-0.00199416		2855.98	0.00480851		3385.97	0.00815834		3915.97	0.00940337
206.2	-0.00031785		736.19	0.01644878		1266.19	0.01179805		1796.19	0.01224505		2326.18	-0.00189077		2856.18	0.00604638		3386.17	0.00754062		3916.17	0.00994213
206.4	0.00002206		736.39	0.01662765		1266.39	0.01225947		1796.39	0.01211846		2326.38	-0.00210383		2856.38	0.00645118		3386.37	0.00722017		3916.37	0.01059294
206.6	0.00005938		736.59	0.01584982		1266.59	0.01201549		1796.59	0.01199376		2326.58	-0.00204077		2856.58	0.00673402		3386.57	0.00645396		3916.57	0.0111043
206.8	-0.00021619		736.79	0.01540352		1266.79	0.01216688		1796.79	0.012171		2326.78	-0.00254082		2856.78	0.00722028		3386.77	0.0066413		3916.77	0.01158282
207	0.0006654		736.99	0.01439297		1266.99	0.01229727		1796.99	0.01203774		2326.98	-0.00304062		2856.98	0.00782247		3386.97	0.00692506		3916.97	0.01208623
207.2	0.00133425		737.19	0.0149883		1267.19	0.01254371		1797.19	0.01180875		2327.18	-0.00355921		2857.18	0.0076185		3387.17	0.0070731		3917.17	0.01292492
207.4	0.00141222		737.39	0.0161921		1267.39	0.01242078		1797.39	0.01207481		2327.38	-0.00420125		2857.38	0.00672579		3387.37	0.00750593		3917.37	0.01377145
207.6	0.00203218		737.59	0.01612709		1267.59	0.01329654		1797.59	0.01213354		2327.58	-0.00582625		2857.58	0.00650905		3387.57	0.00796885		3917.57	0.01518075
207.8	0.00257611		737.79	0.01605579		1267.79	0.01401478		1797.79	0.01331284		2327.78	-0.00658329		2857.78	0.0068768		3387.77	0.00857281		3917.77	0.01483657
208	0.00194596		737.99	0.01678566		1267.99	0.01383533		1797.99	0.01374951		2327.98	-0.00665025		2857.98	0.00697539		3387.97	0.00888785		3917.97	0.01564637
208.2	0.00183862		738.19	0.0173421		1268.19	0.01430761		1798.19	0.01396615		2328.18	-0.00764954		2858.18	0.00721501		3388.17	0.00871663		3918.17	0.01588154
208.4	0.00148552		738.39	0.01800208		1268.39	0.0139496		1798.39	0.01382986		2328.38	-0.00742102		2858.38	0.00710079		3388.37	0.00826955		3918.37	0.01587639
208.6	0.0017727		738.59	0.0178494		1268.59	0.01383359		1798.59	0.01450575		2328.58	-0.00802114		2858.58	0.0078644		3388.57	0.00770118		3918.57	0.01560237
208.8	0.00236931		738.79	0.01939243		1268.79	0.01315009		1798.79	0.014881		2328.78	-0.00804804		2858.78	0.0077221		3388.77	0.00765756		3918.77	0.01538115
209	0.00205615		738.99	0.01923817		1268.99	0.01280083		1798.99	0.01516107		2328.98	-0.00809408		2858.98	0.00792043		3388.97	0.0073954		3918.97	0.01524496
209.2	0.00208335		739.19	0.02004787		1269.19	0.01231104		1799.19	0.01513155		2329.18	-0.00695769		2859.18	0.00814104		3389.17	0.00765013		3919.17	0.01507842
209.4	0.00100546		739.39	0.02017801		1269.39	0.01208249		1799.39	0.01649301		2329.38	-0.00568967		2859.38	0.00898403		3389.37	0.00774215		3919.37	0.01394634
209.6	0.00002346		739.59	0.02033499		1269.59	0.01200927		1799.59	0.0178406		2329.58	-0.00439936		2859.58	0.0088966		3389.57	0.0065918		3919.57	0.01327648
209.8	-0.00101573		739.79	0.02009645		1269.79	0.01223396		1799.79	0.01829362		2329.78	-0.00266401		2859.78	0.00881277		3389.77	0.00613872		3919.77	0.01328624
210	-0.00043329		739.99	0.01975083		1269.99	0.01307155		1799.99	0.01865669		2329.98	-0.00184728		2859.98	0.00928016		3389.97	0.00527019		3919.97	0.01358702
210.2	0.00022605		740.19	0.02027332		1270.19	0.01222652		1800.19	0.01817811		2330.18	-0.00101586		2860.18	0.00964036		3390.17	0.00521034		3920.17	0.01389702
210.4	0.00008164		740.39	0.02050414		1270.39	0.01285242		1800.39	0.01751259		2330.38	0.0000042		2860.38	0.0096239		3390.37	0.00515609		3920.37	0.01390566
210.6	-0.00012594		740.59	0.01979857		1270.59	0.01247891		1800.59	0.01756939		2330.58	0.00078277		2860.58	0.01050033		3390.57	0.00570936		3920.57	0.0141732
210.8	-0.00017416		740.79	0.02005226		1270.79	0.01249596		1800.79	0.01718828		2330.78	0.00035523		2860.78	0.01001514		3390.77	0.00668374		3920.77	0.01538461
211	0.00007843		740.99	0.01998178		1270.99	0.01261215		1800.99	0.01652517		2330.98	0.00032388		2860.98	0.01049818		3390.97	0.00658229		3920.97	0.01646428
211.2	-0.00000315		741.19	0.02029521		1271.19	0.01184167		1801.19	0.01594919		2331.18	0.0000829		2861.18	0.00992168		3391.17	0.00724115		3921.17	0.01807151
211.4	0.00005083		741.39	0.02034333		1271.39	0.01249406		1801.39	0.01653865		2331.38	-0.00079805		2861.38	0.0103677		3391.37	0.00705645		3921.37	0.01809628
211.6	0.0009371		741.59	0.01936429		1271.59	0.01278037		1801.59	0.01616774		2331.58	-0.00147298		2861.58	0.0100262		3391.57	0.00658049		3921.57	0.01903524
211.8	0.00084837		741.79	0.01961977		1271.79	0.01306362		1801.79	0.01552064		2331.78	-0.00111732		2861.78	0.01051656		3391.77	0.00640234		3921.77	0.0191565
212	0.00095591		741.99	0.02062556		1271.99	0.01249863		1801.99	0.01446955		2331.98	-0.00178285		2861.98	0.01041893		3391.97	0.00682594		3921.97	0.02108567
212.2	0.00171867		742.19	0.02051739		1272.19	0.01273542		1802.19	0.01377388		2332.18	-0.00234448		2862.18	0.01078859		3392.17	0.0070604		3922.17	0.02024802
212.4	0.00195105		742.39	0.02113647		1272.39	0.01245359		1802.39	0.01427841		2332.38	-0.00209892		2862.38	0.01016528		3392.37	0.00688454		3922.37	0.02043903
212.6	0.00302358		742.59	0.02057051		1272.59	0.01277284		1802.59	0.01468962		2332.58	-0.00270215		2862.58	0.01011211		3392.57	0.00712014		3922.57	0.02054181
212.8	0.00267907		742.79	0.02164643		1272.79	0.01286641		1802.79	0.01417779		2332.78	-0.00293381		2862.78	0.00938746		3392.77	0.0077932		3922.77	0.02028054
213	0.00235093		742.99	0.0214077		1272.99	0.01341702		1802.99	0.01458037		2332.98	-0.00257598		2862.98	0.01022545		3392.97	0.00825611		3922.97	0.02001533
213.2	0.00235987		743.19	0.02152989		1273.19	0.01439976		1803.19	0.01605681		2333.18	-0.00228753		2863.18	0.00993502		3393.17	0.00926764		3923.17	0.02024256
213.4	0.00194233		743.39	0.02110997		1273.39	0.01486657		1803.39	0.01704583		2333.38	-0.00219098		2863.38	0.01085366		3393.37	0.00911459		3923.37	0.01985637
213.6	0.00244758		743.59	0.0211705		1273.59	0.01575384		1803.59	0.01803224		2333.58	-0.0015423		2863.58	0.01078254		3393.57	0.00938301		3923.57	0.01875306
213.8	0.00189637		743.79	0.02140793		1273.79	0.01717068		1803.79	0.01750984		2333.78	-0.00120505		2863.78	0.01055085		3393.77	0.00968479		3923.77	0.01944548
214	0.00286132		743.99	0.02133061		1273.99	0.01774262		1803.99	0.01791931		2333.98	-0.00108366		2863.98	0.01097781		3393.97	0.01056486		3923.97	0.0195787
214.2	0.00300065		744.19	0.02178997		1274.19	0.01750765		1804.19	0.01789527		2334.18	-0.00091658		2864.18	0.01065908		3394.17	0.01125594		3924.17	0.018704
214.4	0.0037242		744.39	0.02130953		1274.39	0.01802198		1804.39	0.01831228		2334.38	-0.00145911		2864.38	0.01083252		3394.37	0.01242579		3924.37	0.01881079
214.6	0.00392764		744.59	0.02110854		1274.59	0.01895134		1804.59	0.01921888		2334.58	-0.00095161		2864.58	0.01125238		3394.57	0.01301801		3924.57	0.01951746
214.8	0.00409998		744.79	0.02101242		1274.79	0.01849115		1804.79	0.01943261		2334.78	-0.0013503		2864.78	0.01055384		3394.77	0.01353803		3924.77	0.02074438
215	0.00372467		744.99	0.02008279		1274.99	0.01934869		1804.99	0.02028246		2334.98	-0.00107182		2864.98	0.01078827		3394.97	0.01265281		3924.97	0.0210994
215.2	0.00483307		745.19	0.0202418		1275.19	0.01886804		1805.19	0.02159338		2335.18	-0.00121602		2865.18	0.01160729		3395.17	0.01277888		3925.17	0.02113725
215.4	0.00577162		745.39	0.02025612		1275.39	0.01937644		1805.39	0.02242952		2335.38	-0.00094024		2865.38	0.01166034		3395.37	0.01189502		3925.37	0.0206572
215.6	0.00625333		745.59	0.01947761		1275.59	0.01876189		1805.59	0.02290362		2335.58	-0.00056517		2865.58	0.01151661		3395.57	0.01113098		3925.57	0.02095847
215.8	0.00691817		745.79	0.01935101		1275.79	0.01840291		1805.79	0.02313289		2335.78	0.00008178		2865.78	0.01227836		3395.77	0.00997353		3925.77	0.0214972
216	0.00757014		745.99	0.0193466		1275.99	0.01838127		1805.99	0.0235175		2335.98	0.00075419		2865.98	0.01156728		3395.97	0.00991788		3925.97	0.02178613
216.2	0.00693095		746.19	0.01941621		1276.19	0.01800861		1806.19	0.02430912		2336.18	0.00091055		2866.18	0.01124767		3396.17	0.00898285		3926.17	0.02108557
216.4	0.00671501		746.39	0.01950487		1276.39	0.01813749		1806.39	0.0264241		2336.38	0.0010449		2866.38	0.01096511		3396.37	0.00767016		3926.37	0.02203971
216.6	0.00717486		746.59	0.01919827		1276.59	0.01737504		1806.59	0.02696549		2336.58	0.00088906		2866.58	0.01115071		3396.57	0.00727883		3926.57	0.02294463
216.8	0.00575031		746.79	0.0195174		1276.79	0.0186515		1806.79	0.0273211		2336.78	0.00094072		2866.78	0.01159037		3396.77	0.00689575		3926.77	0.02339855
217	0.00622838		746.99	0.01918151		1276.99	0.01945634		1806.99	0.02832584		2336.98	0.00133402		2866.98	0.0122392		3396.97	0.00622781		3926.97	0.02359249
217.2	0.00623578		747.19	0.01927706		1277.19	0.02036066		1807.19	0.02845536		2337.18	0.00091431		2867.18	0.01269008		3397.17	0.00584294		3927.17	0.02413445
217.4	0.00649193		747.39	0.0192315		1277.39	0.01980826		1807.39	0.02814759		2337.38	0.00133274		2867.38	0.01376356		3397.37	0.00561858		3927.37	0.02470543
217.6	0.00600128		747.59	0.01978672		1277.59	0.01996235		1807.59	0.02732977		2337.58	0.00127761		2867.58	0.01363176		3397.57	0.00681368		3927.57	0.02397047
217.8	0.00559651		747.79	0.01986649		1277.79	0.02031055		1807.79	0.02660129		2337.78	0.00043237		2867.78	0.01372142		3397.77	0.00697295		3927.77	0.0250557
218	0.00544497		747.99	0.02009758		1277.99	0.01985902		1807.99	0.02651001		2337.98	0.00010457		2867.98	0.01428835		3397.97	0.00836614		3927.97	0.02604064
218.2	0.00624918		748.19	0.01956092		1278.19	0.02031471		1808.19	0.02617731		2338.18	0.000101		2868.18	0.01424982		3398.17	0.00987404		3928.17	0.02681308
218.4	0.00680779		748.39	0.01896064		1278.39	0.02039267		1808.39	0.02600248		2338.38	-0.0009082		2868.38	0.0141777		3398.37	0.01140146		3928.37	0.0277084
218.6	0.00712001		748.59	0.01894981		1278.59	0.0215208		1808.59	0.02540359		2338.58	-0.00021675		2868.58	0.01474619		3398.57	0.01215898		3928.57	0.02823721
218.8	0.00756839		748.79	0.01840938		1278.79	0.02146481		1808.79	0.02540692		2338.78	-0.00027609		2868.78	0.01464434		3398.77	0.01258095		3928.77	0.02889845
219	0.00816338		748.99	0.01834552		1278.99	0.0224926		1808.99	0.02511919		2338.98	-0.00029861		2868.98	0.01429271		3398.97	0.01225302		3928.97	0.0290613
219.2	0.00922478		749.19	0.01933237		1279.19	0.0217791		1809.19	0.02543091		2339.18	-0.00013959		2869.18	0.01410862		3399.17	0.01245195		3929.17	0.02913206
219.4	0.00928831		749.39	0.01966952		1279.39	0.02182513		1809.39	0.02516112		2339.38	-0.00003415		2869.38	0.01292625		3399.37	0.01203953		3929.37	0.02916987
219.6	0.00934982		749.59	0.01914213		1279.59	0.02195779		1809.59	0.02545854		2339.58	-0.00050477		2869.58	0.01247989		3399.57	0.01154629		3929.57	0.02962671
219.8	0.00855562		749.79	0.02005467		1279.79	0.02168248		1809.79	0.02536262		2339.78	0.00002006		2869.78	0.01187981		3399.77	0.01065013		3929.77	0.02942037
220	0.0084406		749.99	0.02082542		1279.99	0.02243067		1809.99	0.02653587		2339.98	0.00005068		2869.98	0.01047294		3399.97	0.01023095		3929.97	0.02918792
220.2	0.00740331		750.19	0.02145215		1280.19	0.02217142		1810.19	0.02769953		2340.18	-0.00017817		2870.18	0.01085419		3400.17	0.00915204		3930.17	0.0289927
220.4	0.00672305		750.39	0.02195906		1280.39	0.0222793		1810.39	0.02875558		2340.38	0.00066179		2870.38	0.01118902		3400.37	0.00936664		3930.37	0.02951794
220.6	0.00689079		750.59	0.02280576		1280.59	0.02193869		1810.59	0.02833096		2340.58	0.00148758		2870.58	0.01084044		3400.57	0.009426		3930.57	0.02849892
220.8	0.00590458		750.79	0.02303884		1280.79	0.02280372		1810.79	0.02833043		2340.78	0.00184107		2870.78	0.01090484		3400.77	0.00900361		3930.77	0.02766976
221	0.00655376		750.99	0.02281515		1280.99	0.02299301		1810.99	0.02808732		2340.98	0.0020526		2870.98	0.01081218		3400.97	0.00895173		3930.97	0.02764368
221.2	0.00563631		751.19	0.02303443		1281.19	0.0229629		1811.19	0.02795974		2341.18	0.00222781		2871.18	0.01136645		3401.17	0.00906222		3931.17	0.02801156
221.4	0.00487808		751.39	0.02236998		1281.39	0.02208211		1811.39	0.02678863		2341.38	0.00234284		2871.38	0.01165918		3401.37	0.01005564		3931.37	0.02795863
221.6	0.00401857		751.59	0.02236601		1281.59	0.02205932		1811.59	0.02654391		2341.58	0.00215731		2871.58	0.01195279		3401.57	0.01135218		3931.57	0.02810483
221.8	0.00342808		751.79	0.02202417		1281.79	0.02234044		1811.79	0.02650515		2341.78	0.00134833		2871.78	0.01318522		3401.77	0.01136792		3931.77	0.02938069
222	0.0026739		751.99	0.02138427		1281.99	0.02230631		1811.99	0.02540884		2341.98	0.00163388		2871.98	0.01309148		3401.97	0.01258463		3931.97	0.0306987
222.2	0.00303785		752.19	0.02067804		1282.19	0.02238717		1812.19	0.02585724		2342.18	0.00145693		2872.18	0.01380305		3402.17	0.01296333		3932.17	0.03115866
222.4	0.00298543		752.39	0.02020787		1282.39	0.02204875		1812.39	0.02570403		2342.38	0.00042908		2872.38	0.01403334		3402.37	0.01350942		3932.37	0.0316109
222.6	0.00375514		752.59	0.01929725		1282.59	0.02225647		1812.59	0.02538084		2342.58	0.00119962		2872.58	0.01483456		3402.57	0.0141752		3932.57	0.03307767
222.8	0.00410853		752.79	0.01854512		1282.79	0.02240949		1812.79	0.02584916		2342.78	0.0012693		2872.78	0.01451164		3402.77	0.01416373		3932.77	0.03433115
223	0.00483968		752.99	0.01811494		1282.99	0.02265973		1812.99	0.0253558		2342.98	0.00164216		2872.98	0.01332511		3402.97	0.01447857		3932.97	0.03512646
223.2	0.00504495		753.19	0.01817796		1283.19	0.02284779		1813.19	0.02610215		2343.18	0.0025247		2873.18	0.01310297		3403.17	0.01483647		3933.17	0.0356682
223.4	0.00522246		753.39	0.01758715		1283.39	0.02308056		1813.39	0.02649927		2343.38	0.00262718		2873.38	0.0131817		3403.37	0.0152428		3933.37	0.03562821
223.6	0.00561344		753.59	0.01690833		1283.59	0.02310171		1813.59	0.0277516		2343.58	0.00354463		2873.58	0.01341791		3403.57	0.0144206		3933.57	0.03551678
223.8	0.00496793		753.79	0.01829055		1283.79	0.02278944		1813.79	0.0291661		2343.78	0.00437173		2873.78	0.01368669		3403.77	0.01381809		3933.77	0.03518591
224	0.00590906		753.99	0.01846848		1283.99	0.02304641		1813.99	0.02989873		2343.98	0.00508179		2873.98	0.01426693		3403.97	0.013307		3933.97	0.03492875
224.2	0.00515345		754.19	0.01943034		1284.19	0.0225149		1814.19	0.02988186		2344.18	0.00595248		2874.18	0.01478317		3404.17	0.01395048		3934.17	0.03486671
224.4	0.00548452		754.39	0.02088455		1284.39	0.02307897		1814.39	0.0300805		2344.38	0.00670238		2874.38	0.01568381		3404.37	0.01477128		3934.37	0.03488381
224.6	0.0060857		754.59	0.02130421		1284.59	0.02319433		1814.59	0.02990365		2344.58	0.00716219		2874.58	0.01537661		3404.57	0.01466952		3934.57	0.03385852
224.8	0.00579987		754.79	0.02068175		1284.79	0.02337344		1814.79	0.03025444		2344.78	0.00718771		2874.78	0.01608248		3404.77	0.0141775		3934.77	0.03424792
225	0.00651962		754.99	0.02079403		1284.99	0.02368272		1814.99	0.03101486		2344.98	0.00698869		2874.98	0.01633665		3404.97	0.01424275		3934.97	0.03397271
225.2	0.00563076		755.19	0.02133458		1285.19	0.02366097		1815.19	0.03141448		2345.18	0.0065511		2875.18	0.01689038		3405.17	0.01467734		3935.17	0.03295296
225.4	0.00576147		755.39	0.021608		1285.39	0.02444137		1815.39	0.03059558		2345.38	0.00670613		2875.38	0.01742445		3405.37	0.01578993		3935.37	0.03285137
225.6	0.00599778		755.59	0.02177536		1285.59	0.02536975		1815.59	0.03148441		2345.58	0.00605215		2875.58	0.0178324		3405.57	0.01618903		3935.57	0.03327338
225.8	0.00580358		755.79	0.02177193		1285.79	0.0257653		1815.79	0.0312412		2345.78	0.00552874		2875.78	0.01824325		3405.77	0.01588106		3935.77	0.03379574
226	0.00562395		755.99	0.02217267		1285.99	0.02556511		1815.99	0.03123651		2345.98	0.00454157		2875.98	0.01806904		3405.97	0.01617823		3935.97	0.03506749
226.2	0.00623175		756.19	0.02225755		1286.19	0.02458209		1816.19	0.03211892		2346.18	0.00409329		2876.18	0.01880823		3406.17	0.01567206		3936.17	0.03566843
226.4	0.00665552		756.39	0.02200081		1286.39	0.02525853		1816.39	0.03218987		2346.38	0.00401914		2876.38	0.01801336		3406.37	0.01660638		3936.37	0.03757786
226.6	0.00652791		756.59	0.02121397		1286.59	0.0255242		1816.59	0.03184466		2346.58	0.00466377		2876.58	0.017975		3406.57	0.01650091		3936.57	0.03925975
226.8	0.00665187		756.79	0.02110361		1286.79	0.02601351		1816.79	0.03146345		2346.78	0.00542218		2876.78	0.01707868		3406.77	0.01619954		3936.77	0.04001959
227	0.00687559		756.99	0.02134186		1286.99	0.0258849		1816.99	0.03160028		2346.98	0.00594939		2876.98	0.01649596		3406.97	0.01593994		3936.97	0.04028126
227.2	0.00704621		757.19	0.02145984		1287.19	0.02513317		1817.19	0.03199197		2347.18	0.00556057		2877.18	0.01698668		3407.17	0.01557658		3937.17	0.04059782
227.4	0.00734594		757.39	0.02086318		1287.39	0.02545694		1817.39	0.03182856		2347.38	0.00506081		2877.38	0.01719582		3407.37	0.0148499		3937.37	0.04090319
227.6	0.00796723		757.59	0.02102261		1287.59	0.02566923		1817.59	0.03166662		2347.58	0.0057226		2877.58	0.01710618		3407.57	0.01393671		3937.57	0.04121728
227.8	0.00749606		757.79	0.02154247		1287.79	0.0261307		1817.79	0.03147082		2347.78	0.00555426		2877.78	0.01732267		3407.77	0.01351026		3937.77	0.04226248
228	0.00693506		757.99	0.02167197		1287.99	0.02680559		1817.99	0.03045575		2347.98	0.00616613		2877.98	0.01795083		3407.97	0.01367641		3937.97	0.04213272
228.2	0.00716158		758.19	0.02246025		1288.19	0.02767083		1818.19	0.03014533		2348.18	0.00709342		2878.18	0.01814007		3408.17	0.01407213		3938.17	0.04320632
228.4	0.00754781		758.39	0.02231629		1288.39	0.02840248		1818.39	0.03008201		2348.38	0.00723642		2878.38	0.01840021		3408.37	0.01398308		3938.37	0.04418766
228.6	0.00777232		758.59	0.0221398		1288.59	0.02884198		1818.59	0.02887876		2348.58	0.00796422		2878.58	0.01803468		3408.57	0.01431393		3938.57	0.04388113
228.8	0.00789799		758.79	0.02162656		1288.79	0.02936672		1818.79	0.02927126		2348.78	0.00746373		2878.78	0.01877616		3408.77	0.01395804		3938.77	0.04417856
229	0.00871636		758.99	0.02234599		1288.99	0.02948163		1818.99	0.03000764		2348.98	0.00721747		2878.98	0.01892223		3408.97	0.01488131		3938.97	0.0439665
229.2	0.00913803		759.19	0.02217887		1289.19	0.02995598		1819.19	0.0297982		2349.18	0.00654559		2879.18	0.01930694		3409.17	0.016011		3939.17	0.04301967
229.4	0.00983465		759.39	0.02197564		1289.39	0.03072783		1819.39	0.02975808		2349.38	0.00647608		2879.38	0.01968603		3409.37	0.01654386		3939.37	0.04334372
229.6	0.01010843		759.59	0.02182111		1289.59	0.03040367		1819.59	0.03059416		2349.58	0.00577724		2879.58	0.0199718		3409.57	0.01749187		3939.57	0.04302409
229.8	0.00979675		759.79	0.02201417		1289.79	0.02969481		1819.79	0.030854		2349.78	0.00606058		2879.78	0.02035019		3409.77	0.01767872		3939.77	0.04368684
230	0.00959725		759.99	0.02180531		1289.99	0.02912415		1819.99	0.03181091		2349.98	0.00484537		2879.98	0.0201578		3409.97	0.01699612		3939.97	0.04406025
230.2	0.00927855		760.19	0.02196999		1290.19	0.02848087		1820.19	0.03234174		2350.18	0.00445276		2880.18	0.01973802		3410.17	0.0164008		3940.17	0.0443492
230.4	0.00919332		760.39	0.02205871		1290.39	0.0281933		1820.39	0.03168695		2350.38	0.00358133		2880.38	0.01929704		3410.37	0.01655112		3940.37	0.04579439
230.6	0.00771953		760.59	0.02203904		1290.59	0.02773206		1820.59	0.03188166		2350.58	0.00344251		2880.58	0.01974319		3410.57	0.01607425		3940.57	0.04687821
230.8	0.00707176		760.79	0.02243571		1290.79	0.02746529		1820.79	0.03220978		2350.78	0.00353564		2880.78	0.01907609		3410.77	0.01596262		3940.77	0.04711775
231	0.00604267		760.99	0.02270884		1290.99	0.02663957		1820.99	0.03313863		2350.98	0.0029245		2880.98	0.01922215		3410.97	0.01547146		3940.97	0.04691776
231.2	0.00591867		761.19	0.02201526		1291.19	0.02582813		1821.19	0.03298456		2351.18	0.00263121		2881.18	0.01925968		3411.17	0.01460963		3941.17	0.04697209
231.4	0.00563307		761.39	0.02089317		1291.39	0.02598003		1821.39	0.03314811		2351.38	0.00342105		2881.38	0.01891377		3411.37	0.01480428		3941.37	0.04732893
231.6	0.00495284		761.59	0.02008135		1291.59	0.02585174		1821.59	0.03286485		2351.58	0.00443998		2881.58	0.01930747		3411.57	0.01459039		3941.57	0.04712634
231.8	0.00360558		761.79	0.0201579		1291.79	0.02630072		1821.79	0.0336813		2351.78	0.00523954		2881.78	0.019952		3411.77	0.01390358		3941.77	0.04783162
232	0.00327631		761.99	0.02032251		1291.99	0.02618913		1821.99	0.0332393		2351.98	0.00621565		2881.98	0.020122		3411.97	0.01431884		3941.97	0.04768208
232.2	0.00403965		762.19	0.02074635		1292.19	0.0268695		1822.19	0.03278172		2352.18	0.00735618		2882.18	0.02026779		3412.17	0.01388582		3942.17	0.04807722
232.4	0.00402037		762.39	0.02063583		1292.39	0.02740401		1822.39	0.03277879		2352.38	0.00743258		2882.38	0.01983733		3412.37	0.01375582		3942.37	0.04838634
232.6	0.00466136		762.59	0.02087877		1292.59	0.02929234		1822.59	0.03223011		2352.58	0.00763899		2882.58	0.02017388		3412.57	0.0142648		3942.57	0.04807702
232.8	0.00518987		762.79	0.02087666		1292.79	0.0300348		1822.79	0.03290669		2352.78	0.00656253		2882.78	0.01955233		3412.77	0.01455601		3942.77	0.04859569
233	0.00662442		762.99	0.02130968		1292.99	0.0303406		1822.99	0.03282375		2352.98	0.0073899		2882.98	0.01924923		3412.97	0.01519065		3942.97	0.04822722
233.2	0.00725077		763.19	0.0209737		1293.19	0.03126392		1823.19	0.03289925		2353.18	0.0080509		2883.18	0.0189251		3413.17	0.01499682		3943.17	0.04747249
233.4	0.00722812		763.39	0.02125801		1293.39	0.03197369		1823.39	0.03323411		2353.38	0.0086179		2883.38	0.01899904		3413.37	0.01533722		3943.37	0.0473057
233.6	0.00757521		763.59	0.02160279		1293.59	0.03302183		1823.59	0.03337925		2353.58	0.00844807		2883.58	0.01903333		3413.57	0.01539588		3943.57	0.0471457
233.8	0.00743071		763.79	0.02157052		1293.79	0.03334125		1823.79	0.03354411		2353.78	0.00832164		2883.78	0.0193898		3413.77	0.01493779		3943.77	0.04749082
234	0.0071342		763.99	0.02136784		1293.99	0.03445696		1823.99	0.0342552		2353.98	0.00677565		2883.98	0.01997182		3413.97	0.01435379		3943.97	0.04784977
234.2	0.00675961		764.19	0.02167633		1294.19	0.03473714		1824.19	0.03420781		2354.18	0.00558605		2884.18	0.01972034		3414.17	0.01485763		3944.17	0.04836646
234.4	0.00652501		764.39	0.02130947		1294.39	0.034928		1824.39	0.0346003		2354.38	0.00544567		2884.38	0.02016336		3414.37	0.01485353		3944.37	0.04905597
234.6	0.00572734		764.59	0.02149702		1294.59	0.03533966		1824.59	0.03539754		2354.58	0.0058217		2884.58	0.0206803		3414.57	0.0151387		3944.57	0.04967487
234.8	0.00538874		764.79	0.02146485		1294.79	0.03532126		1824.79	0.03585021		2354.78	0.005832		2884.78	0.02056987		3414.77	0.01511258		3944.77	0.04883798
235	0.00587015		764.99	0.02114903		1294.99	0.03452778		1824.99	0.03672543		2354.98	0.00600081		2884.98	0.02072063		3414.97	0.01509723		3944.97	0.04925037
235.2	0.00615964		765.19	0.02043567		1295.19	0.03418668		1825.19	0.03751602		2355.18	0.00548245		2885.18	0.02112088		3415.17	0.01567197		3945.17	0.04863231
235.4	0.0064105		765.39	0.0206309		1295.39	0.03343853		1825.39	0.03889897		2355.38	0.00532881		2885.38	0.02025512		3415.37	0.01679321		3945.37	0.04917699
235.6	0.00669764		765.59	0.02049673		1295.59	0.03344732		1825.59	0.03954988		2355.58	0.00612463		2885.58	0.020621		3415.57	0.01600004		3945.57	0.04863319
235.8	0.00710614		765.79	0.02067964		1295.79	0.03348083		1825.79	0.04011994		2355.78	0.00588374		2885.78	0.0203025		3415.77	0.01660453		3945.77	0.04893699
236	0.00809555		765.99	0.02050486		1295.99	0.03304383		1825.99	0.03963958		2355.98	0.00511334		2885.98	0.02009892		3415.97	0.01661103		3945.97	0.04810055
236.2	0.00852836		766.19	0.02045126		1296.19	0.03363126		1826.19	0.03918611		2356.18	0.00492927		2886.18	0.02002527		3416.17	0.01672631		3946.17	0.04823553
236.4	0.00949909		766.39	0.01982568		1296.39	0.03321748		1826.39	0.03937848		2356.38	0.00412394		2886.38	0.01974152		3416.37	0.01753443		3946.37	0.04865408
236.6	0.00966791		766.59	0.019139		1296.59	0.0338868		1826.59	0.03930176		2356.58	0.00379538		2886.58	0.01881281		3416.57	0.01863368		3946.57	0.04812056
236.8	0.01013736		766.79	0.01916532		1296.79	0.03337604		1826.79	0.03893487		2356.78	0.00401437		2886.78	0.01819963		3416.77	0.01880656		3946.77	0.04718708
237	0.01021645		766.99	0.01983267		1296.99	0.03319384		1826.99	0.03829089		2356.98	0.00508148		2886.98	0.01793884		3416.97	0.01941395		3946.97	0.04664792
237.2	0.00968308		767.19	0.02011188		1297.19	0.03382238		1827.19	0.03835174		2357.18	0.00530984		2887.18	0.01818625		3417.17	0.01981974		3947.17	0.04688879
237.4	0.0097336		767.39	0.02104151		1297.39	0.0344171		1827.39	0.03787372		2357.38	0.00502131		2887.38	0.01814329		3417.37	0.02036083		3947.37	0.04738608
237.6	0.00991773		767.59	0.02126402		1297.59	0.03481938		1827.59	0.03743115		2357.58	0.00558891		2887.58	0.01832482		3417.57	0.0196081		3947.57	0.0477064
237.8	0.00934729		767.79	0.02145329		1297.79	0.03507771		1827.79	0.03690094		2357.78	0.00628443		2887.78	0.01880873		3417.77	0.01982997		3947.77	0.04870757
238	0.00957263		767.99	0.02124736		1297.99	0.03573417		1827.99	0.03697047		2357.98	0.00561867		2887.98	0.01899111		3417.97	0.01913378		3947.97	0.04973796
238.2	0.00916034		768.19	0.02122776		1298.19	0.03622004		1828.19	0.03759391		2358.18	0.00604667		2888.18	0.01863603		3418.17	0.01899422		3948.17	0.05000381
238.4	0.00947409		768.39	0.02101705		1298.39	0.03570663		1828.39	0.0383637		2358.38	0.00687018		2888.38	0.01952895		3418.37	0.01864674		3948.37	0.05063454
238.6	0.0100408		768.59	0.0216785		1298.59	0.03599369		1828.59	0.03811116		2358.58	0.00744056		2888.58	0.02054123		3418.57	0.01810773		3948.57	0.05181192
238.8	0.01001748		768.79	0.02178227		1298.79	0.03610326		1828.79	0.03924473		2358.78	0.00768926		2888.78	0.01999475		3418.77	0.01784142		3948.77	0.05194278
239	0.01069876		768.99	0.02216129		1298.99	0.03612442		1828.99	0.04011673		2358.98	0.00835821		2888.98	0.0194987		3418.97	0.01799608		3948.97	0.05308611
239.2	0.01028997		769.19	0.02251622		1299.19	0.03588011		1829.19	0.04125214		2359.18	0.00853369		2889.18	0.01975505		3419.17	0.01771169		3949.17	0.05366484
239.4	0.01099852		769.39	0.02297467		1299.39	0.03483347		1829.39	0.04122343		2359.38	0.00940885		2889.38	0.01880504		3419.37	0.01647335		3949.37	0.05412767
239.6	0.01125449		769.59	0.02235248		1299.59	0.03484446		1829.59	0.04073176		2359.58	0.01012645		2889.58	0.01976666		3419.57	0.01512918		3949.57	0.05366782
239.8	0.01086747		769.79	0.02191915		1299.79	0.03534284		1829.79	0.04065571		2359.78	0.0093744		2889.78	0.02023036		3419.77	0.01530279		3949.77	0.05400742
240	0.01057629		769.99	0.02143397		1299.99	0.03517346		1829.99	0.04091745		2359.98	0.00853129		2889.98	0.02018952		3419.97	0.01434718		3949.97	0.05312643
240.2	0.01046278		770.19	0.02047561		1300.19	0.03522881		1830.19	0.04063937		2360.18	0.00884686		2890.18	0.02070344		3420.17	0.01399077		3950.17	0.05270784
240.4	0.01084657		770.39	0.01958584		1300.39	0.03509525		1830.39	0.04146577		2360.38	0.00784196		2890.38	0.02109943		3420.37	0.01444088		3950.37	0.05191767
240.6	0.01006437		770.59	0.01879284		1300.59	0.03610824		1830.59	0.04163488		2360.58	0.00809909		2890.58	0.0214997		3420.57	0.01487498		3950.57	0.05109691
240.8	0.00880055		770.79	0.01907855		1300.79	0.03670958		1830.79	0.04133179		2360.78	0.00831703		2890.78	0.02194421		3420.77	0.01480077		3950.77	0.05085931
241	0.00824986		770.99	0.01991057		1300.99	0.0380892		1830.99	0.0414909		2360.98	0.00783904		2890.98	0.02262519		3420.97	0.01505798		3950.97	0.05164945
241.2	0.00796199		771.19	0.01963506		1301.19	0.03924998		1831.19	0.04103882		2361.18	0.00783125		2891.18	0.02258593		3421.17	0.01485674		3951.17	0.05269732
241.4	0.00756439		771.39	0.01966238		1301.39	0.04010782		1831.39	0.04054735		2361.38	0.00792788		2891.38	0.02204469		3421.37	0.01454411		3951.37	0.05293276
241.6	0.00695875		771.59	0.01985594		1301.59	0.04042957		1831.59	0.04077326		2361.58	0.00862484		2891.58	0.02175195		3421.57	0.01465014		3951.57	0.05302447
241.8	0.00703654		771.79	0.01970479		1301.79	0.0413699		1831.79	0.03973162		2361.78	0.00805883		2891.78	0.02185591		3421.77	0.01545754		3951.77	0.05315416
242	0.00805627		771.99	0.01948121		1301.99	0.04266288		1831.99	0.04050647		2361.98	0.00717698		2891.98	0.0220901		3421.97	0.01513981		3951.97	0.05342225
242.2	0.00827571		772.19	0.01921677		1302.19	0.04286302		1832.19	0.04140933		2362.18	0.00774555		2892.18	0.02290735		3422.17	0.01506426		3952.17	0.05439934
242.4	0.00868775		772.39	0.01945869		1302.39	0.04208634		1832.39	0.04151025		2362.38	0.00813691		2892.38	0.02350554		3422.37	0.01512064		3952.37	0.05520964
242.6	0.00923311		772.59	0.02034745		1302.59	0.0427453		1832.59	0.04148666		2362.58	0.00882299		2892.58	0.02417248		3422.57	0.01537839		3952.57	0.05569587
242.8	0.00875438		772.79	0.02081489		1302.79	0.04176559		1832.79	0.04210333		2362.78	0.00957857		2892.78	0.02381723		3422.77	0.01585676		3952.77	0.05553258
243	0.00898143		772.99	0.02172234		1302.99	0.04105209		1832.99	0.04173174		2362.98	0.01015036		2892.98	0.02331409		3422.97	0.01641026		3952.97	0.05577618
243.2	0.00950746		773.19	0.02171467		1303.19	0.03968278		1833.19	0.04169653		2363.18	0.00963933		2893.18	0.02377855		3423.17	0.01481628		3953.17	0.05539106
243.4	0.00972029		773.39	0.02277405		1303.39	0.03865072		1833.39	0.04218967		2363.38	0.00940588		2893.38	0.02395447		3423.37	0.01381997		3953.37	0.05432443
243.6	0.01083093		773.59	0.02312722		1303.59	0.03806343		1833.59	0.0423382		2363.58	0.00967602		2893.58	0.02505508		3423.57	0.01377621		3953.57	0.05447836
243.8	0.01041008		773.79	0.02384251		1303.79	0.03728862		1833.79	0.04346902		2363.78	0.00954032		2893.78	0.0254381		3423.77	0.01352735		3953.77	0.05395368
244	0.01059035		773.99	0.02325801		1303.99	0.03664295		1833.99	0.04384496		2363.98	0.0084763		2893.98	0.02535679		3423.97	0.01391691		3953.97	0.05262424
244.2	0.01132767		774.19	0.02277086		1304.19	0.03699395		1834.19	0.04456478		2364.18	0.00829988		2894.18	0.02547834		3424.17	0.01407769		3954.17	0.05268643
244.4	0.01121074		774.39	0.02246433		1304.39	0.03683324		1834.39	0.04556075		2364.38	0.00856393		2894.38	0.02542226		3424.37	0.0141888		3954.37	0.05274958
244.6	0.01061898		774.59	0.02280236		1304.59	0.03692394		1834.59	0.04574619		2364.58	0.00940595		2894.58	0.02544633		3424.57	0.01483447		3954.57	0.05377677
244.8	0.00927271		774.79	0.02254307		1304.79	0.03745539		1834.79	0.04611643		2364.78	0.00929374		2894.78	0.02486844		3424.77	0.015248		3954.77	0.05424544
245	0.00941583		774.99	0.02210256		1304.99	0.03841897		1834.99	0.04660497		2364.98	0.00934052		2894.98	0.02513421		3424.97	0.01619496		3954.97	0.05443895
245.2	0.00903747		775.19	0.02142079		1305.19	0.03844026		1835.19	0.04588576		2365.18	0.00960666		2895.18	0.02425351		3425.17	0.01702864		3955.17	0.05481498
245.4	0.00871504		775.39	0.02073204		1305.39	0.03921129		1835.39	0.04647764		2365.38	0.0095485		2895.38	0.02402041		3425.37	0.01814126		3955.37	0.05575238
245.6	0.00861794		775.59	0.02072774		1305.59	0.03975823		1835.59	0.04654768		2365.58	0.00933326		2895.58	0.02400558		3425.57	0.01876698		3955.57	0.05641263
245.8	0.00943551		775.79	0.01981422		1305.79	0.04112503		1835.79	0.04568777		2365.78	0.00897902		2895.78	0.02500783		3425.77	0.01841179		3955.77	0.0576054
246	0.01027545		775.99	0.01985481		1305.99	0.04222746		1835.99	0.04641405		2365.98	0.00873738		2895.98	0.02513941		3425.97	0.01743692		3955.97	0.05891728
246.2	0.01015531		776.19	0.01943875		1306.19	0.04210187		1836.19	0.04616486		2366.18	0.00972529		2896.18	0.02635321		3426.17	0.01728569		3956.17	0.06019608
246.4	0.00996827		776.39	0.01963098		1306.39	0.0424395		1836.39	0.04551046		2366.38	0.01119568		2896.38	0.02718826		3426.37	0.01814824		3956.37	0.06051228
246.6	0.01041909		776.59	0.01988382		1306.59	0.04313207		1836.59	0.04584017		2366.58	0.01171227		2896.58	0.02720915		3426.57	0.0182908		3956.57	0.0611835
246.8	0.00971926		776.79	0.0200572		1306.79	0.04278204		1836.79	0.04568705		2366.78	0.0119595		2896.78	0.02687583		3426.77	0.01798022		3956.77	0.06186225
247	0.0098672		776.99	0.02072112		1306.99	0.04285024		1836.99	0.04490552		2366.98	0.01108835		2896.98	0.02612294		3426.97	0.0175064		3956.97	0.06167755
247.2	0.00927521		777.19	0.02143353		1307.19	0.04268097		1837.19	0.04500834		2367.18	0.01042387		2897.18	0.02710868		3427.17	0.01664294		3957.17	0.06198978
247.4	0.00877372		777.39	0.02312015		1307.39	0.04231352		1837.39	0.04588194		2367.38	0.01093864		2897.38	0.02721975		3427.37	0.016191		3957.37	0.0621609
247.6	0.00937957		777.59	0.02268463		1307.59	0.04284542		1837.59	0.04586276		2367.58	0.01135729		2897.58	0.02709588		3427.57	0.01602903		3957.57	0.06173991
247.8	0.00795686		777.79	0.02306338		1307.79	0.04290027		1837.79	0.04634455		2367.78	0.01148582		2897.78	0.02708491		3427.77	0.0156761		3957.77	0.06051233
248	0.00840826		777.99	0.02296118		1307.99	0.04380813		1837.99	0.04618713		2367.98	0.01148844		2897.98	0.02728912		3427.97	0.01656249		3957.97	0.05919762
248.2	0.00852492		778.19	0.02288423		1308.19	0.04338326		1838.19	0.04711279		2368.18	0.01223269		2898.18	0.02695171		3428.17	0.01690114		3958.17	0.05915626
248.4	0.0079505		778.39	0.0230933		1308.39	0.04194673		1838.39	0.04688801		2368.38	0.01248191		2898.38	0.02673926		3428.37	0.01757041		3958.37	0.05890483
248.6	0.00767493		778.59	0.02317119		1308.59	0.04190516		1838.59	0.04638731		2368.58	0.01172916		2898.58	0.02640466		3428.57	0.01847518		3958.57	0.05954751
248.8	0.00776409		778.79	0.02307807		1308.79	0.04179559		1838.79	0.0466403		2368.78	0.01100551		2898.78	0.02596728		3428.77	0.0193448		3958.77	0.05892608
249	0.00894755		778.99	0.02263029		1308.99	0.04218862		1838.99	0.04716323		2368.98	0.01181153		2898.98	0.02531521		3428.97	0.02022929		3958.97	0.05825461
249.2	0.00951706		779.19	0.02232141		1309.19	0.04244316		1839.19	0.0470987		2369.18	0.01146332		2899.18	0.02497467		3429.17	0.02034801		3959.17	0.05941098
249.4	0.00999206		779.39	0.02277777		1309.39	0.04314137		1839.39	0.04756342		2369.38	0.01047024		2899.38	0.02556074		3429.37	0.02036616		3959.37	0.06087641
249.6	0.0103237		779.59	0.02276022		1309.59	0.04340782		1839.59	0.04735189		2369.58	0.01013295		2899.58	0.02538523		3429.57	0.01983239		3959.57	0.06115755
249.8	0.01066798		779.79	0.02290965		1309.79	0.04270547		1839.79	0.04769278		2369.78	0.0094093		2899.78	0.02624757		3429.77	0.01913966		3959.77	0.06249895
250	0.0106591		779.99	0.02291684		1309.99	0.04234285		1839.99	0.04741549		2369.98	0.00941311		2899.98	0.02608466		3429.97	0.01888593		3959.97	0.06277533
250.2	0.01072001		780.19	0.0230298		1310.19	0.04225889		1840.19	0.04750696		2370.18	0.01044403		2900.18	0.02715044		3430.17	0.01918035		3960.17	0.06363555
250.4	0.01107124		780.39	0.02278759		1310.39	0.04234712		1840.39	0.04829389		2370.38	0.01051887		2900.38	0.02798636		3430.37	0.0189104		3960.37	0.06457303
250.6	0.01081627		780.59	0.02251344		1310.59	0.04150774		1840.59	0.0488696		2370.58	0.00976395		2900.58	0.02832173		3430.57	0.01886194		3960.57	0.06617033
250.8	0.0104069		780.79	0.02257702		1310.79	0.04139825		1840.79	0.0488773		2370.78	0.00972556		2900.78	0.0282063		3430.77	0.01907814		3960.77	0.0664671
251	0.0097288		780.99	0.02287632		1310.99	0.04181637		1840.99	0.04921535		2370.98	0.00956806		2900.98	0.02787915		3430.97	0.01963187		3960.97	0.06709852
251.2	0.00910897		781.19	0.02294829		1311.19	0.04226374		1841.19	0.05033846		2371.18	0.00967815		2901.18	0.02789208		3431.17	0.01922326		3961.17	0.06789535
251.4	0.00938248		781.39	0.02343687		1311.39	0.042936		1841.39	0.05037023		2371.38	0.01039024		2901.38	0.02761058		3431.37	0.01892355		3961.37	0.06807422
251.6	0.00929919		781.59	0.02256758		1311.59	0.0444098		1841.59	0.0508688		2371.58	0.0108559		2901.58	0.02784544		3431.57	0.01955231		3961.57	0.06781022
251.8	0.00947202		781.79	0.02316904		1311.79	0.04509896		1841.79	0.05074087		2371.78	0.01137794		2901.78	0.02832015		3431.77	0.01995849		3961.77	0.06783346
252	0.01076078		781.99	0.02277714		1311.99	0.04525122		1841.99	0.05072948		2371.98	0.01186112		2901.98	0.02820002		3431.97	0.02020976		3961.97	0.06751601
252.2	0.01065939		782.19	0.02272924		1312.19	0.04476139		1842.19	0.05134794		2372.18	0.01171409		2902.18	0.0281569		3432.17	0.01966049		3962.17	0.06789393
252.4	0.01039687		782.39	0.02304206		1312.39	0.0446059		1842.39	0.05110118		2372.38	0.01142749		2902.38	0.02698991		3432.37	0.01972191		3962.37	0.06831812
252.6	0.01169842		782.59	0.02349731		1312.59	0.0454116		1842.59	0.05111419		2372.58	0.01097955		2902.58	0.02564151		3432.57	0.01960991		3962.57	0.06827059
252.8	0.01262552		782.79	0.02404747		1312.79	0.04555474		1842.79	0.05186707		2372.78	0.01123806		2902.78	0.02521194		3432.77	0.02011257		3962.77	0.06835857
253	0.01328639		782.99	0.02374057		1312.99	0.04628618		1842.99	0.05236668		2372.98	0.01180524		2902.98	0.02460946		3432.97	0.02004522		3962.97	0.0678322
253.2	0.01329318		783.19	0.02489857		1313.19	0.04747124		1843.19	0.05322217		2373.18	0.01147477		2903.18	0.02474506		3433.17	0.02024059		3963.17	0.0682894
253.4	0.01308158		783.39	0.0253493		1313.39	0.04697981		1843.39	0.05306152		2373.38	0.01091705		2903.38	0.02477799		3433.37	0.02061796		3963.37	0.06807474
253.6	0.01291441		783.59	0.02483497		1313.59	0.04643173		1843.59	0.05326926		2373.58	0.01106704		2903.58	0.02450365		3433.57	0.02059441		3963.57	0.06755095
253.8	0.01279067		783.79	0.02434053		1313.79	0.04565558		1843.79	0.05333681		2373.78	0.01030859		2903.78	0.02565749		3433.77	0.02084108		3963.77	0.06805512
254	0.01293154		783.99	0.02356384		1313.99	0.04613037		1843.99	0.05314074		2373.98	0.01191993		2903.98	0.02606667		3433.97	0.02058738		3963.97	0.06759284
254.2	0.01335034		784.19	0.02401168		1314.19	0.04576567		1844.19	0.05368323		2374.18	0.01225122		2904.18	0.02741313		3434.17	0.01994633		3964.17	0.0678812
254.4	0.01294486		784.39	0.02284595		1314.39	0.04561492		1844.39	0.05290983		2374.38	0.01172583		2904.38	0.02820399		3434.37	0.01927865		3964.37	0.06827375
254.6	0.01253876		784.59	0.02272778		1314.59	0.04444935		1844.59	0.05198355		2374.58	0.01229656		2904.58	0.02867298		3434.57	0.01975154		3964.57	0.06898007
254.8	0.01197604		784.79	0.02284242		1314.79	0.04490136		1844.79	0.05217307		2374.78	0.01263821		2904.78	0.0284602		3434.77	0.0204976		3964.77	0.06852758
255	0.01175618		784.99	0.02278259		1314.99	0.04475589		1844.99	0.05195351		2374.98	0.01236976		2904.98	0.02884361		3434.97	0.02052688		3964.97	0.06895579
255.2	0.01167865		785.19	0.02301163		1315.19	0.04440053		1845.19	0.0505117		2375.18	0.01270557		2905.18	0.02919868		3435.17	0.01968703		3965.17	0.06883571
255.4	0.01093656		785.39	0.02340443		1315.39	0.04426296		1845.39	0.04953459		2375.38	0.01269638		2905.38	0.02999705		3435.37	0.02042508		3965.37	0.06845673
255.6	0.01044293		785.59	0.02304829		1315.59	0.04432994		1845.59	0.04999563		2375.58	0.01291778		2905.58	0.03005399		3435.57	0.02018826		3965.57	0.06804194
255.8	0.01057517		785.79	0.02440314		1315.79	0.04438745		1845.79	0.04914272		2375.78	0.01309643		2905.78	0.02989502		3435.77	0.01991111		3965.77	0.06784221
256	0.00987753		785.99	0.02472175		1315.99	0.04345582		1845.99	0.04784725		2375.98	0.01269674		2905.98	0.0303283		3435.97	0.01913296		3965.97	0.06736329
256.2	0.00898018		786.19	0.02576036		1316.19	0.04352768		1846.19	0.04704952		2376.18	0.0131168		2906.18	0.03060147		3436.17	0.01891074		3966.17	0.0674905
256.4	0.00900115		786.39	0.02603874		1316.39	0.04331361		1846.39	0.04667764		2376.38	0.01268898		2906.38	0.02953597		3436.37	0.01990735		3966.37	0.06773192
256.6	0.00898869		786.59	0.02627575		1316.59	0.04385234		1846.59	0.04633636		2376.58	0.01197666		2906.58	0.02975794		3436.57	0.02001997		3966.57	0.06826445
256.8	0.00860735		786.79	0.02650362		1316.79	0.04378087		1846.79	0.04699534		2376.78	0.01208041		2906.78	0.03033625		3436.77	0.02018487		3966.77	0.06839875
257	0.00849416		786.99	0.02630645		1316.99	0.04465131		1846.99	0.04732814		2376.98	0.01206353		2906.98	0.03135981		3436.97	0.02032455		3966.97	0.06770306
257.2	0.00789432		787.19	0.02635013		1317.19	0.04472759		1847.19	0.04778368		2377.18	0.01246872		2907.18	0.03151082		3437.17	0.02110198		3967.17	0.06817907
257.4	0.00764628		787.39	0.02512038		1317.39	0.0444265		1847.39	0.04905222		2377.38	0.01193131		2907.38	0.0313987		3437.37	0.02178346		3967.37	0.06831308
257.6	0.00811779		787.59	0.02445939		1317.59	0.04490233		1847.59	0.05089132		2377.58	0.01162344		2907.58	0.03128332		3437.57	0.02173063		3967.57	0.06947849
257.8	0.00906074		787.79	0.02342285		1317.79	0.04638417		1847.79	0.05230627		2377.78	0.01247506		2907.78	0.03151656		3437.77	0.02204957		3967.77	0.07019533
258	0.0091611		787.99	0.02301168		1317.99	0.04690821		1847.99	0.0531499		2377.98	0.01304915		2907.98	0.03140502		3437.97	0.02135821		3967.97	0.07054423
258.2	0.00927108		788.19	0.02324046		1318.19	0.04720971		1848.19	0.05371239		2378.18	0.01255702		2908.18	0.03114039		3438.17	0.02045786		3968.17	0.07153401
258.4	0.00942378		788.39	0.02161044		1318.39	0.04797522		1848.39	0.05367796		2378.38	0.01293675		2908.38	0.03118054		3438.37	0.02035627		3968.37	0.07172985
258.6	0.01008605		788.59	0.02199342		1318.59	0.0478501		1848.59	0.05465662		2378.58	0.01393578		2908.58	0.03136843		3438.57	0.02090703		3968.57	0.07195343
258.8	0.01031473		788.79	0.02186684		1318.79	0.04812456		1848.79	0.05560741		2378.78	0.0146554		2908.78	0.03050841		3438.77	0.02089187		3968.77	0.07129954
259	0.01091777		788.99	0.0219652		1318.99	0.04709513		1848.99	0.0559112		2378.98	0.0144525		2908.98	0.0309392		3438.97	0.02113346		3968.97	0.07120007
259.2	0.01025799		789.19	0.02213765		1319.19	0.04712529		1849.19	0.05640741		2379.18	0.01550573		2909.18	0.03041594		3439.17	0.02131258		3969.17	0.07128393
259.4	0.01004641		789.39	0.0234141		1319.39	0.04774672		1849.39	0.05700759		2379.38	0.01503478		2909.38	0.0297826		3439.37	0.0214599		3969.37	0.07079407
259.6	0.01042356		789.59	0.02398399		1319.59	0.04791804		1849.59	0.0568923		2379.58	0.01536446		2909.58	0.02885459		3439.57	0.02173174		3969.57	0.07113911
259.8	0.01025726		789.79	0.02497341		1319.79	0.04819998		1849.79	0.0550208		2379.78	0.01521006		2909.78	0.02837048		3439.77	0.02275424		3969.77	0.07188775
260	0.01001919		789.99	0.0254223		1319.99	0.04866291		1849.99	0.05424444		2379.98	0.01434443		2909.98	0.0291194		3439.97	0.02260523		3969.97	0.07167418
260.2	0.01108794		790.19	0.02524196		1320.19	0.04908838		1850.19	0.05365496		2380.18	0.0149895		2910.18	0.02870336		3440.17	0.02342494		3970.17	0.07195488
260.4	0.01139676		790.39	0.02517118		1320.39	0.04900424		1850.39	0.0537334		2380.38	0.01441843		2910.38	0.02877168		3440.37	0.02438144		3970.37	0.07246186
260.6	0.01135114		790.59	0.02574184		1320.59	0.04918194		1850.59	0.05294378		2380.58	0.01437041		2910.58	0.02972884		3440.57	0.02441453		3970.57	0.07353409
260.8	0.01132306		790.79	0.02625446		1320.79	0.04914686		1850.79	0.05304416		2380.78	0.01399046		2910.78	0.03097928		3440.77	0.02442736		3970.77	0.07398571
261	0.01115772		790.99	0.02671863		1320.99	0.05004011		1850.99	0.05307459		2380.98	0.01289153		2910.98	0.03206981		3440.97	0.0250261		3970.97	0.07482549
261.2	0.01149033		791.19	0.02630371		1321.19	0.05017293		1851.19	0.05337192		2381.18	0.01236839		2911.18	0.03220419		3441.17	0.02507427		3971.17	0.07583127
261.4	0.01240006		791.39	0.02557753		1321.39	0.05100958		1851.39	0.05525744		2381.38	0.0118916		2911.38	0.03233533		3441.37	0.02479209		3971.37	0.07658051
261.6	0.01284959		791.59	0.02462611		1321.59	0.05178153		1851.59	0.05592525		2381.58	0.01190888		2911.58	0.0329811		3441.57	0.02403953		3971.57	0.07702111
261.8	0.01311373		791.79	0.02460583		1321.79	0.05324918		1851.79	0.05569574		2381.78	0.01164046		2911.78	0.03387318		3441.77	0.02282454		3971.77	0.07744091
262	0.01269566		791.99	0.02461718		1321.99	0.05269289		1851.99	0.05593678		2381.98	0.01184952		2911.98	0.03416596		3441.97	0.02208479		3971.97	0.07812329
262.2	0.01278415		792.19	0.02422709		1322.19	0.0534344		1852.19	0.05596067		2382.18	0.01241238		2912.18	0.03429522		3442.17	0.02162821		3972.17	0.07895056
262.4	0.01245346		792.39	0.02386988		1322.39	0.05446441		1852.39	0.05630384		2382.38	0.0129829		2912.38	0.03510447		3442.37	0.02134355		3972.37	0.07948763
262.6	0.01220291		792.59	0.02428095		1322.59	0.05355859		1852.59	0.0563062		2382.58	0.01320164		2912.58	0.03497433		3442.57	0.02105236		3972.57	0.07921989
262.8	0.01124106		792.79	0.02401521		1322.79	0.05236561		1852.79	0.05752525		2382.78	0.01358611		2912.78	0.03435832		3442.77	0.02001916		3972.77	0.07876284
263	0.01071974		792.99	0.02424806		1322.99	0.05174428		1852.99	0.05769305		2382.98	0.01361199		2912.98	0.03421108		3442.97	0.02003173		3972.97	0.07898928
263.2	0.00972654		793.19	0.02390805		1323.19	0.05196029		1853.19	0.05786029		2383.18	0.01362772		2913.18	0.03281113		3443.17	0.02001866		3973.17	0.07970337
263.4	0.00964651		793.39	0.02399603		1323.39	0.05054081		1853.39	0.05700908		2383.38	0.01341565		2913.38	0.03178738		3443.37	0.02032988		3973.37	0.07968384
263.6	0.00949226		793.59	0.02331492		1323.59	0.04916311		1853.59	0.05776456		2383.58	0.01342589		2913.58	0.0308101		3443.57	0.02175056		3973.57	0.07981428
263.8	0.00908855		793.79	0.02331819		1323.79	0.04917907		1853.79	0.05685336		2383.78	0.01325357		2913.78	0.03070826		3443.77	0.02236648		3973.77	0.0794911
264	0.00957578		793.99	0.02353405		1323.99	0.04989225		1853.99	0.05708941		2383.98	0.0134604		2913.98	0.03084878		3443.97	0.02309431		3973.97	0.07863642
264.2	0.00986264		794.19	0.02380664		1324.19	0.04955276		1854.19	0.05693406		2384.18	0.01357147		2914.18	0.02976857		3444.17	0.02451897		3974.17	0.07838734
264.4	0.00928431		794.39	0.02441522		1324.39	0.04966999		1854.39	0.05676008		2384.38	0.01420702		2914.38	0.0300651		3444.37	0.02563548		3974.37	0.0785125
264.6	0.00872148		794.59	0.02525404		1324.59	0.05001763		1854.59	0.05675988		2384.58	0.01406817		2914.58	0.03051746		3444.57	0.02545812		3974.57	0.07878419
264.8	0.00870697		794.79	0.02504775		1324.79	0.05028942		1854.79	0.05752599		2384.78	0.01326862		2914.78	0.03117107		3444.77	0.02582914		3974.77	0.07892621
265	0.00956799		794.99	0.02582947		1324.99	0.05167162		1854.99	0.05847496		2384.98	0.01256705		2914.98	0.03121977		3444.97	0.02593555		3974.97	0.0791525
265.2	0.01056428		795.19	0.02489186		1325.19	0.0519438		1855.19	0.05866994		2385.18	0.01387476		2915.18	0.03169215		3445.17	0.02605745		3975.17	0.07917392
265.4	0.01143844		795.39	0.02532097		1325.39	0.05225822		1855.39	0.05966946		2385.38	0.01378374		2915.38	0.03228347		3445.37	0.02559501		3975.37	0.07928178
265.6	0.01110611		795.59	0.02490968		1325.59	0.05283531		1855.59	0.05999081		2385.58	0.01386976		2915.58	0.03319833		3445.57	0.02477307		3975.57	0.07875138
265.8	0.01177177		795.79	0.02588515		1325.79	0.0537269		1855.79	0.05972635		2385.78	0.01383955		2915.78	0.03399911		3445.77	0.02389238		3975.77	0.07958508
266	0.01156074		795.99	0.02637518		1325.99	0.05427549		1855.99	0.06092772		2385.98	0.01480455		2915.98	0.03395893		3445.97	0.02430781		3975.97	0.07969376
266.2	0.01205074		796.19	0.02611637		1326.19	0.05509757		1856.19	0.06109674		2386.18	0.01422828		2916.18	0.03451041		3446.17	0.02428571		3976.17	0.07964675
266.4	0.01151703		796.39	0.02666708		1326.39	0.05544184		1856.39	0.06172313		2386.38	0.01449797		2916.38	0.03563703		3446.37	0.02378323		3976.37	0.08041631
266.6	0.0114833		796.59	0.02571853		1326.59	0.05491666		1856.59	0.06171607		2386.58	0.01394744		2916.58	0.03576897		3446.57	0.02313894		3976.57	0.08030745
266.8	0.0111937		796.79	0.0255754		1326.79	0.05430208		1856.79	0.06296225		2386.78	0.01435398		2916.78	0.03501266		3446.77	0.02225141		3976.77	0.08131497
267	0.01249146		796.99	0.02524721		1326.99	0.05424704		1856.99	0.06266379		2386.98	0.01414432		2916.98	0.03484884		3446.97	0.02205894		3976.97	0.0819566
267.2	0.01230549		797.19	0.02444248		1327.19	0.05262213		1857.19	0.06259757		2387.18	0.01354812		2917.18	0.0354755		3447.17	0.02236094		3977.17	0.08259603
267.4	0.01202193		797.39	0.02428819		1327.39	0.05159657		1857.39	0.06262543		2387.38	0.01411155		2917.38	0.03601483		3447.37	0.02203422		3977.37	0.08247663
267.6	0.01255151		797.59	0.02489562		1327.59	0.05135187		1857.59	0.06335132		2387.58	0.0141324		2917.58	0.03631731		3447.57	0.02271171		3977.57	0.08230395
267.8	0.01288362		797.79	0.02484672		1327.79	0.05275843		1857.79	0.0624732		2387.78	0.01367434		2917.78	0.03693718		3447.77	0.02353219		3977.77	0.08297452
268	0.01274767		797.99	0.02477657		1327.99	0.05296372		1857.99	0.06271048		2387.98	0.01326013		2917.98	0.03633924		3447.97	0.02432406		3977.97	0.08315802
268.2	0.01297294		798.19	0.02536219		1328.19	0.05298272		1858.19	0.06191055		2388.18	0.01278013		2918.18	0.03575428		3448.17	0.02469541		3978.17	0.08275997
268.4	0.01328428		798.39	0.0253886		1328.39	0.05351991		1858.39	0.06121731		2388.38	0.01367145		2918.38	0.03552261		3448.37	0.02448028		3978.37	0.08287925
268.6	0.01316283		798.59	0.02590007		1328.59	0.05375802		1858.59	0.06140462		2388.58	0.01331228		2918.58	0.03547597		3448.57	0.02381552		3978.57	0.08306389
268.8	0.01409972		798.79	0.02609624		1328.79	0.05429635		1858.79	0.06067778		2388.78	0.01354107		2918.78	0.03513731		3448.77	0.024215		3978.77	0.08301841
269	0.01388899		798.99	0.02617814		1328.99	0.05481615		1858.99	0.06053526		2388.98	0.01366952		2918.98	0.03470681		3448.97	0.02436608		3978.97	0.0826588
269.2	0.01450726		799.19	0.02591661		1329.19	0.05422171		1859.19	0.05939399		2389.18	0.01394882		2919.18	0.03439934		3449.17	0.02452694		3979.17	0.08256291
269.4	0.01427589		799.39	0.02663367		1329.39	0.05486064		1859.39	0.0595577		2389.38	0.01336557		2919.38	0.03472384		3449.37	0.02353521		3979.37	0.08264806
269.6	0.01367743		799.59	0.02599739		1329.59	0.05497461		1859.59	0.059622		2389.58	0.01406506		2919.58	0.03413485		3449.57	0.02261971		3979.57	0.08236848
269.8	0.01374649		799.79	0.02659479		1329.79	0.05510452		1859.79	0.05916687		2389.78	0.01395709		2919.78	0.03318355		3449.77	0.02316232		3979.77	0.08256736
270	0.01356943		799.99	0.02627707		1329.99	0.05551586		1859.99	0.05913052		2389.98	0.01449827		2919.98	0.03244192		3449.97	0.02303465		3979.97	0.08256625
270.2	0.01336593		800.19	0.02612026		1330.19	0.05558002		1860.19	0.0584157		2390.18	0.01449482		2920.18	0.03315155		3450.17	0.02341052		3980.17	0.0823951
270.4	0.01230739		800.39	0.02532117		1330.39	0.05557892		1860.39	0.05838583		2390.38	0.01483268		2920.38	0.03251561		3450.37	0.02343344		3980.37	0.08377087
270.6	0.01213376		800.59	0.02418067		1330.59	0.0546819		1860.59	0.05850625		2390.58	0.01435641		2920.58	0.03233295		3450.57	0.02367121		3980.57	0.08374472
270.8	0.01247918		800.79	0.02392136		1330.79	0.05384258		1860.79	0.05829799		2390.78	0.01522396		2920.78	0.03240329		3450.77	0.02354595		3980.77	0.08325789
271	0.01299569		800.99	0.02419621		1330.99	0.05359664		1860.99	0.05852584		2390.98	0.01544069		2920.98	0.03312995		3450.97	0.02342639		3980.97	0.08333908
271.2	0.01159667		801.19	0.02467413		1331.19	0.05294982		1861.19	0.05868718		2391.18	0.01499916		2921.18	0.03448623		3451.17	0.02386045		3981.17	0.08318577
271.4	0.0117287		801.39	0.02449224		1331.39	0.05346123		1861.39	0.05931229		2391.38	0.01499506		2921.38	0.03398929		3451.37	0.02395989		3981.37	0.08318648
271.6	0.01214636		801.59	0.0245425		1331.59	0.05341046		1861.59	0.06031052		2391.58	0.01482263		2921.58	0.03376644		3451.57	0.02541658		3981.57	0.08326151
271.8	0.01221156		801.79	0.02401695		1331.79	0.05380313		1861.79	0.060766		2391.78	0.01399081		2921.78	0.03431938		3451.77	0.02617224		3981.77	0.08363944
272	0.01189368		801.99	0.02414781		1331.99	0.05304067		1861.99	0.06057674		2391.98	0.01345947		2921.98	0.03469367		3451.97	0.02518773		3981.97	0.08340714
272.2	0.01179825		802.19	0.02443966		1332.19	0.05384559		1862.19	0.05993055		2392.18	0.01332145		2922.18	0.0347721		3452.17	0.02527887		3982.17	0.08405457
272.4	0.01129049		802.39	0.02484153		1332.39	0.05532945		1862.39	0.06068988		2392.38	0.01364207		2922.38	0.03523977		3452.37	0.02544771		3982.37	0.08354322
272.6	0.01115353		802.59	0.02518627		1332.59	0.05574586		1862.59	0.06121734		2392.58	0.013494		2922.58	0.03618967		3452.57	0.02516353		3982.57	0.08288459
272.8	0.01062421		802.79	0.02565713		1332.79	0.05695278		1862.79	0.06117737		2392.78	0.0133524		2922.78	0.03670065		3452.77	0.02518021		3982.77	0.0821841
273	0.01028742		802.99	0.02587726		1332.99	0.05716785		1862.99	0.06167348		2392.98	0.01276579		2922.98	0.03711828		3452.97	0.02575081		3982.97	0.08272934
273.2	0.01108091		803.19	0.02633628		1333.19	0.05724352		1863.19	0.06175185		2393.18	0.01191676		2923.18	0.03780601		3453.17	0.02502446		3983.17	0.08343884
273.4	0.0106569		803.39	0.02581457		1333.39	0.05809787		1863.39	0.06256099		2393.38	0.01176861		2923.38	0.03887074		3453.37	0.02460635		3983.37	0.08379877
273.6	0.01126498		803.59	0.025587		1333.59	0.05825784		1863.59	0.0628447		2393.58	0.01140265		2923.58	0.03920832		3453.57	0.02445911		3983.57	0.08410397
273.8	0.0116388		803.79	0.02563548		1333.79	0.05730887		1863.79	0.06169353		2393.78	0.01112425		2923.78	0.03946639		3453.77	0.02467695		3983.77	0.08437518
274	0.01206827		803.99	0.02534569		1333.99	0.05817826		1863.99	0.06184979		2393.98	0.01229257		2923.98	0.04035219		3453.97	0.02411515		3983.97	0.0845153
274.2	0.01242852		804.19	0.02503745		1334.19	0.0580159		1864.19	0.061882		2394.18	0.01273784		2924.18	0.04131743		3454.17	0.02540355		3984.17	0.08451543
274.4	0.01269481		804.39	0.02407308		1334.39	0.0576006		1864.39	0.06187453		2394.38	0.01267933		2924.38	0.0415895		3454.37	0.02524696		3984.37	0.08554932
274.6	0.01356962		804.59	0.02391621		1334.59	0.05724778		1864.59	0.06212478		2394.58	0.0134094		2924.58	0.04270834		3454.57	0.02572225		3984.57	0.08575277
274.8	0.01405493		804.79	0.02366099		1334.79	0.05802921		1864.79	0.06226361		2394.78	0.01368604		2924.78	0.0424671		3454.77	0.02518143		3984.77	0.08511777
275	0.01403583		804.99	0.0240518		1334.99	0.05888132		1864.99	0.06279333		2394.98	0.01407366		2924.98	0.04145961		3454.97	0.02461912		3984.97	0.08608465
275.2	0.01377476		805.19	0.02399458		1335.19	0.05884803		1865.19	0.06321672		2395.18	0.01445093		2925.18	0.04059564		3455.17	0.02438259		3985.17	0.0861594
275.4	0.01381448		805.39	0.02361704		1335.39	0.05928523		1865.39	0.06374932		2395.38	0.01503565		2925.38	0.03885703		3455.37	0.02434296		3985.37	0.08622253
275.6	0.01307314		805.59	0.02367994		1335.59	0.05935875		1865.59	0.06453122		2395.58	0.01590704		2925.58	0.03803809		3455.57	0.02437272		3985.57	0.08662888
275.8	0.01250922		805.79	0.02347756		1335.79	0.05918911		1865.79	0.06466894		2395.78	0.01618651		2925.78	0.03802405		3455.77	0.024174		3985.77	0.08657471
276	0.01150722		805.99	0.02408095		1335.99	0.05909087		1865.99	0.06488591		2395.98	0.01591602		2925.98	0.03712243		3455.97	0.02402621		3985.97	0.08675068
276.2	0.01086399		806.19	0.02384232		1336.19	0.06052075		1866.19	0.06514254		2396.18	0.01632004		2926.18	0.03585512		3456.17	0.0243264		3986.17	0.08696845
276.4	0.01020122		806.39	0.02395436		1336.39	0.06103499		1866.39	0.06599456		2396.38	0.01711966		2926.38	0.03503837		3456.37	0.02481309		3986.37	0.08615825
276.6	0.0105254		806.59	0.02462863		1336.59	0.06198306		1866.59	0.0657421		2396.58	0.01695144		2926.58	0.0339574		3456.57	0.02383684		3986.57	0.08636647
276.8	0.00973962		806.79	0.02476776		1336.79	0.06205699		1866.79	0.06576798		2396.78	0.0172451		2926.78	0.03415932		3456.77	0.02463233		3986.77	0.08644139
277	0.00976633		806.99	0.02450624		1336.99	0.06018075		1866.99	0.0659702		2396.98	0.01844656		2926.98	0.03443475		3456.97	0.02482612		3986.97	0.08723919
277.2	0.00950295		807.19	0.02357069		1337.19	0.05912348		1867.19	0.06539053		2397.18	0.01766453		2927.18	0.03538574		3457.17	0.02446953		3987.17	0.08755524
277.4	0.00929758		807.39	0.02321806		1337.39	0.05890726		1867.39	0.06552627		2397.38	0.01792204		2927.38	0.03569735		3457.37	0.02465489		3987.37	0.08794434
277.6	0.00957856		807.59	0.02336144		1337.59	0.05793621		1867.59	0.06583371		2397.58	0.01814508		2927.58	0.03663579		3457.57	0.0254443		3987.57	0.0875963
277.8	0.0096263		807.79	0.02347345		1337.79	0.05681005		1867.79	0.0655855		2397.78	0.01872665		2927.78	0.03635454		3457.77	0.02491549		3987.77	0.08839238
278	0.00985991		807.99	0.02373018		1337.99	0.05690241		1867.99	0.06547796		2397.98	0.01839247		2927.98	0.03762839		3457.97	0.02596845		3987.97	0.08903582
278.2	0.01038928		808.19	0.02222627		1338.19	0.05618645		1868.19	0.06491317		2398.18	0.01806021		2928.18	0.03810258		3458.17	0.02626876		3988.17	0.08925878
278.4	0.0103839		808.39	0.02176433		1338.39	0.05589844		1868.39	0.0649509		2398.38	0.017317		2928.38	0.03958797		3458.37	0.02580907		3988.37	0.09012699
278.6	0.01099132		808.59	0.02095942		1338.59	0.05564738		1868.59	0.06543372		2398.58	0.01843676		2928.58	0.03992647		3458.57	0.02602386		3988.57	0.09045329
278.8	0.01066604		808.79	0.0213523		1338.79	0.05535382		1868.79	0.06477973		2398.78	0.01841386		2928.78	0.03949426		3458.77	0.02548501		3988.77	0.08992371
279	0.01082112		808.99	0.02110215		1338.99	0.05542552		1868.99	0.06456225		2398.98	0.0188177		2928.98	0.03882624		3458.97	0.02608829		3988.97	0.09035817
279.2	0.01111883		809.19	0.02182151		1339.19	0.0552844		1869.19	0.06441625		2399.18	0.01912915		2929.18	0.03923481		3459.17	0.02614419		3989.17	0.08993302
279.4	0.01087579		809.39	0.02228		1339.39	0.05620364		1869.39	0.06463805		2399.38	0.01844831		2929.38	0.03957375		3459.37	0.02621446		3989.37	0.09027111
279.6	0.01092645		809.59	0.02259258		1339.59	0.05685492		1869.59	0.06523599		2399.58	0.01782299		2929.58	0.03961558		3459.57	0.02613678		3989.57	0.09027881
279.8	0.01144494		809.79	0.02231754		1339.79	0.05670792		1869.79	0.06509339		2399.78	0.01724458		2929.78	0.04057107		3459.77	0.02595951		3989.77	0.09003294
280	0.01140089		809.99	0.02244077		1339.99	0.05736273		1869.99	0.06586862		2399.98	0.01627022		2929.98	0.04077316		3459.97	0.02561963		3989.97	0.09063476
280.2	0.01180094		810.19	0.02185729		1340.19	0.05882637		1870.19	0.06633161		2400.18	0.01632075		2930.18	0.04136592		3460.17	0.02534957		3990.17	0.09043061
280.4	0.01140923		810.39	0.02205833		1340.39	0.05876025		1870.39	0.0674457		2400.38	0.01587182		2930.38	0.04124228		3460.37	0.02522399		3990.37	0.09086149
280.6	0.01170503		810.59	0.02270619		1340.59	0.05970134		1870.59	0.0670929		2400.58	0.01537375		2930.58	0.0412723		3460.57	0.02444659		3990.57	0.09101096
280.8	0.01085428		810.79	0.02304093		1340.79	0.05858056		1870.79	0.06776686		2400.78	0.01501795		2930.78	0.04224303		3460.77	0.02494748		3990.77	0.09101011
281	0.01121238		810.99	0.02413874		1340.99	0.05770268		1870.99	0.0682158		2400.98	0.01536778		2930.98	0.0433584		3460.97	0.02450536		3990.97	0.090977
281.2	0.01078546		811.19	0.02493459		1341.19	0.05807652		1871.19	0.06794305		2401.18	0.01452472		2931.18	0.04401145		3461.17	0.02479913		3991.17	0.09093527
281.4	0.01148817		811.39	0.02549711		1341.39	0.05882611		1871.39	0.06881462		2401.38	0.01454555		2931.38	0.04433875		3461.37	0.02504478		3991.37	0.09058897
281.6	0.01205535		811.59	0.02502867		1341.59	0.05870597		1871.59	0.06913217		2401.58	0.01456531		2931.58	0.04411791		3461.57	0.02513857		3991.57	0.09049091
281.8	0.01225601		811.79	0.0257493		1341.79	0.05938729		1871.79	0.06845612		2401.78	0.01529531		2931.78	0.04366014		3461.77	0.0246369		3991.77	0.09157126
282	0.01222662		811.99	0.02550221		1341.99	0.05943215		1871.99	0.06844265		2401.98	0.01548366		2931.98	0.04437388		3461.97	0.02529727		3991.97	0.09134118
282.2	0.01178372		812.19	0.02410845		1342.19	0.05910129		1872.19	0.06935183		2402.18	0.01635653		2932.18	0.04375172		3462.17	0.02515719		3992.17	0.09100074
282.4	0.01263717		812.39	0.02457212		1342.39	0.05902677		1872.39	0.07024321		2402.38	0.01749217		2932.38	0.0444822		3462.37	0.0257487		3992.37	0.09139607
282.6	0.0120186		812.59	0.02471965		1342.59	0.05872857		1872.59	0.06956375		2402.58	0.01872742		2932.58	0.04318757		3462.57	0.02673065		3992.57	0.09162784
282.8	0.01261797		812.79	0.02525002		1342.79	0.05822904		1872.79	0.06941037		2402.78	0.01889724		2932.78	0.04282558		3462.77	0.02703956		3992.77	0.09211171
283	0.01318696		812.99	0.02437009		1342.99	0.05854309		1872.99	0.06924192		2402.98	0.01903485		2932.98	0.04250069		3462.97	0.02827989		3992.97	0.09220777
283.2	0.01355105		813.19	0.02447185		1343.19	0.05927572		1873.19	0.06866339		2403.18	0.02055995		2933.18	0.04318618		3463.17	0.0283461		3993.17	0.09245606
283.4	0.01315929		813.39	0.02420312		1343.39	0.05936738		1873.39	0.06912628		2403.38	0.02073022		2933.38	0.04268025		3463.37	0.02771348		3993.37	0.09329555
283.6	0.01307181		813.59	0.02338436		1343.59	0.05871492		1873.59	0.06953898		2403.58	0.0210312		2933.58	0.04260503		3463.57	0.02741017		3993.57	0.09360452
283.8	0.01288108		813.79	0.02256448		1343.79	0.05832548		1873.79	0.06960828		2403.78	0.02102725		2933.78	0.04319991		3463.77	0.02677336		3993.77	0.09433965
284	0.0124199		813.99	0.02197472		1343.99	0.05902964		1873.99	0.07139609		2403.98	0.0211609		2933.98	0.0422147		3463.97	0.02654968		3993.97	0.09486509
284.2	0.01203895		814.19	0.02152378		1344.19	0.06001836		1874.19	0.07136057		2404.18	0.02129303		2934.18	0.04175449		3464.17	0.02625727		3994.17	0.0953145
284.4	0.01156707		814.39	0.02140979		1344.39	0.05981576		1874.39	0.0716778		2404.38	0.02059847		2934.38	0.04101531		3464.37	0.02619339		3994.37	0.09646068
284.6	0.01214891		814.59	0.02159356		1344.59	0.06082145		1874.59	0.07091538		2404.58	0.02006541		2934.58	0.04110675		3464.57	0.02644114		3994.57	0.09549736
284.8	0.01194747		814.79	0.02158025		1344.79	0.06078416		1874.79	0.07163933		2404.78	0.01968173		2934.78	0.04155004		3464.77	0.02698766		3994.77	0.09528297
285	0.01274343		814.99	0.02098691		1344.99	0.0610414		1874.99	0.0718553		2404.98	0.01968891		2934.98	0.04268763		3464.97	0.02711953		3994.97	0.09439227
285.2	0.01253506		815.19	0.0211605		1345.19	0.06156217		1875.19	0.07150734		2405.18	0.0188478		2935.18	0.04324313		3465.17	0.02687337		3995.17	0.09379777
285.4	0.01304549		815.39	0.02073428		1345.39	0.06201473		1875.39	0.07122018		2405.38	0.01936094		2935.38	0.04312052		3465.37	0.02653147		3995.37	0.09297481
285.6	0.01259064		815.59	0.01922872		1345.59	0.06210593		1875.59	0.0706387		2405.58	0.01979149		2935.58	0.04294588		3465.57	0.02629318		3995.57	0.09275553
285.8	0.01207079		815.79	0.0193505		1345.79	0.06225765		1875.79	0.07045322		2405.78	0.02078304		2935.78	0.04435318		3465.77	0.02687523		3995.77	0.09222556
286	0.0123223		815.99	0.01957403		1345.99	0.06191196		1875.99	0.07183249		2405.98	0.01969125		2935.98	0.04573763		3465.97	0.02652876		3995.97	0.09162512
286.2	0.01260713		816.19	0.02004409		1346.19	0.06158261		1876.19	0.07234175		2406.18	0.01913307		2936.18	0.04559596		3466.17	0.02644057		3996.17	0.09140217
286.4	0.01356433		816.39	0.02097248		1346.39	0.06209319		1876.39	0.07196351		2406.38	0.01946048		2936.38	0.04629204		3466.37	0.02593334		3996.37	0.09137576
286.6	0.01368837		816.59	0.02157165		1346.59	0.06212585		1876.59	0.07146236		2406.58	0.01940229		2936.58	0.04551668		3466.57	0.02581792		3996.57	0.09251969
286.8	0.01514401		816.79	0.02183052		1346.79	0.06250023		1876.79	0.07259009		2406.78	0.02062752		2936.78	0.04594483		3466.77	0.02520416		3996.77	0.09311256
287	0.01528469		816.99	0.02232066		1346.99	0.06283884		1876.99	0.07215528		2406.98	0.02140624		2936.98	0.04491356		3466.97	0.02551677		3996.97	0.0927046
287.2	0.0152542		817.19	0.02229996		1347.19	0.06368076		1877.19	0.0716268		2407.18	0.02182456		2937.18	0.04391533		3467.17	0.02516902		3997.17	0.09259004
287.4	0.01566667		817.39	0.02293578		1347.39	0.06372421		1877.39	0.07187093		2407.38	0.02187088		2937.38	0.04259917		3467.37	0.02455805		3997.37	0.09293915
287.6	0.01601235		817.59	0.02162745		1347.59	0.06401166		1877.59	0.07172154		2407.58	0.02219922		2937.58	0.04251932		3467.57	0.02489413		3997.57	0.0941502
287.8	0.01605492		817.79	0.021644		1347.79	0.06470251		1877.79	0.07170309		2407.78	0.02254292		2937.78	0.04217004		3467.77	0.02508708		3997.77	0.09385683
288	0.01686129		817.99	0.02183741		1347.99	0.06586716		1877.99	0.07240684		2407.98	0.02345256		2937.98	0.04089604		3467.97	0.02483437		3997.97	0.09387095
288.2	0.01664229		818.19	0.02289163		1348.19	0.0673273		1878.19	0.07188039		2408.18	0.02390509		2938.18	0.04090006		3468.17	0.02578783		3998.17	0.09398449
288.4	0.01705878		818.39	0.02348566		1348.39	0.06695776		1878.39	0.07176748		2408.38	0.0232456		2938.38	0.04109919		3468.37	0.02682603		3998.37	0.09334502
288.6	0.01786221		818.59	0.02345981		1348.59	0.06799737		1878.59	0.07166666		2408.58	0.02340737		2938.58	0.04184159		3468.57	0.02813812		3998.57	0.09238061
288.8	0.01759708		818.79	0.02360865		1348.79	0.06781344		1878.79	0.07237664		2408.78	0.02296285		2938.78	0.0418509		3468.77	0.02861807		3998.77	0.0928087
289	0.01731291		818.99	0.02319775		1348.99	0.06834571		1878.99	0.07190812		2408.98	0.02277362		2938.98	0.04271054		3468.97	0.02910569		3998.97	0.09255343
289.2	0.01718094		819.19	0.02457127		1349.19	0.06829525		1879.19	0.07163246		2409.18	0.02223873		2939.18	0.04294654		3469.17	0.02925103		3999.17	0.09209478
289.4	0.01671008		819.39	0.0246303		1349.39	0.06797141		1879.39	0.07074939		2409.38	0.022745		2939.38	0.04331282		3469.37	0.02921198		3999.37	0.09181393
289.6	0.01623293		819.59	0.02397808		1349.59	0.06727305		1879.59	0.07100735		2409.58	0.02214042		2939.58	0.04486211		3469.57	0.0299348		3999.57	0.09218935
289.8	0.0159425		819.79	0.02512378		1349.79	0.06683017		1879.79	0.07176541		2409.78	0.02236611		2939.78	0.04587023		3469.77	0.02960178		3999.77	0.09250292
290	0.01573783		819.99	0.02592555		1349.99	0.06662807		1879.99	0.0720998		2409.98	0.02180537		2939.98	0.04652921		3469.97	0.02865664		3999.97	0.09279763
290.2	0.01576435		820.19	0.02639009		1350.19	0.06596795		1880.19	0.07209479		2410.18	0.02162462		2940.18	0.04618907		3470.17	0.02794161		4000.17	0.0935177
290.4	0.01555424		820.39	0.02706233		1350.39	0.06610973		1880.39	0.07254677		2410.38	0.02119236		2940.38	0.04656784		3470.37	0.02707076		4000.37	0.09490198
290.6	0.01482305		820.59	0.02759843		1350.59	0.06597495		1880.59	0.07342356		2410.58	0.02053674		2940.58	0.04645869		3470.57	0.02678234		4000.57	0.09649343
290.8	0.01482296		820.79	0.02750034		1350.79	0.06576816		1880.79	0.07391709		2410.78	0.02045832		2940.78	0.04624379		3470.77	0.02646308		4000.77	0.09677437
291	0.01415695		820.99	0.02749349		1350.99	0.0657384		1880.99	0.0735609		2410.98	0.01880107		2940.98	0.04569894		3470.97	0.02633548		4000.97	0.0970793
291.2	0.01311059		821.19	0.02657342		1351.19	0.06607967		1881.19	0.07388062		2411.18	0.01745352		2941.18	0.04601039		3471.17	0.02659103		4001.17	0.09788455
291.4	0.01248676		821.39	0.02544094		1351.39	0.06558674		1881.39	0.07406675		2411.38	0.0167359		2941.38	0.04590062		3471.37	0.02646286		4001.37	0.09862695
291.6	0.01234358		821.59	0.02381495		1351.59	0.0645576		1881.59	0.0738739		2411.58	0.01714464		2941.58	0.04634472		3471.57	0.02659567		4001.57	0.09981622
291.8	0.01210597		821.79	0.02404484		1351.79	0.06495512		1881.79	0.07468028		2411.78	0.01772872		2941.78	0.04664197		3471.77	0.02664281		4001.77	0.09914612
292	0.01218405		821.99	0.02464308		1351.99	0.06606514		1881.99	0.07578769		2411.98	0.01823497		2941.98	0.04627381		3471.97	0.02681075		4001.97	0.0996381
292.2	0.01202572		822.19	0.02447749		1352.19	0.06719935		1882.19	0.07604201		2412.18	0.01844014		2942.18	0.04589815		3472.17	0.02723338		4002.17	0.10041492
292.4	0.01229393		822.39	0.02355707		1352.39	0.06718087		1882.39	0.07633846		2412.38	0.01915862		2942.38	0.04598354		3472.37	0.02727385		4002.37	0.10013623
292.6	0.01302886		822.59	0.02203416		1352.59	0.06796363		1882.59	0.07650321		2412.58	0.01983568		2942.58	0.04546589		3472.57	0.02725691		4002.57	0.09991935
292.8	0.0133788		822.79	0.02185781		1352.79	0.06820115		1882.79	0.07692431		2412.78	0.01948965		2942.78	0.04443315		3472.77	0.02720064		4002.77	0.10031432
293	0.01369594		822.99	0.02140132		1352.99	0.06867023		1882.99	0.07641352		2412.98	0.0205254		2942.98	0.04461291		3472.97	0.02774868		4002.97	0.10017924
293.2	0.01483257		823.19	0.02153745		1353.19	0.06816196		1883.19	0.07638536		2413.18	0.0214634		2943.18	0.04446858		3473.17	0.02707098		4003.17	0.10017432
293.4	0.0151822		823.39	0.02139455		1353.39	0.06774471		1883.39	0.07562066		2413.38	0.02231242		2943.38	0.04549538		3473.37	0.02625399		4003.37	0.10034572
293.6	0.01562337		823.59	0.02020862		1353.59	0.06703403		1883.59	0.07629867		2413.58	0.02350867		2943.58	0.04606768		3473.57	0.02629919		4003.57	0.10013945
293.8	0.01612796		823.79	0.0207046		1353.79	0.0670608		1883.79	0.0762462		2413.78	0.02492619		2943.78	0.04606161		3473.77	0.02585318		4003.77	0.10007406
294	0.01709547		823.99	0.02128142		1353.99	0.06699979		1883.99	0.07583979		2413.98	0.02486978		2943.98	0.04667215		3473.97	0.02611207		4003.97	0.10024816
294.2	0.01755867		824.19	0.02157843		1354.19	0.0675891		1884.19	0.07557185		2414.18	0.02465535		2944.18	0.04712032		3474.17	0.02665999		4004.17	0.10047027
294.4	0.01722686		824.39	0.02186306		1354.39	0.0675737		1884.39	0.07616432		2414.38	0.02458322		2944.38	0.04741385		3474.37	0.02762268		4004.37	0.10097596
294.6	0.01683413		824.59	0.02233069		1354.59	0.06781969		1884.59	0.07682108		2414.58	0.02368187		2944.58	0.04825955		3474.57	0.0276769		4004.57	0.10129844
294.8	0.01675703		824.79	0.02191857		1354.79	0.0664264		1884.79	0.07686265		2414.78	0.02223336		2944.78	0.04797956		3474.77	0.02871603		4004.77	0.10101698
295	0.01608626		824.99	0.02204162		1354.99	0.06602476		1884.99	0.0767979		2414.98	0.02047278		2944.98	0.04846629		3474.97	0.02925847		4004.97	0.10073757
295.2	0.01498644		825.19	0.0226812		1355.19	0.06635558		1885.19	0.07668213		2415.18	0.01962265		2945.18	0.0488964		3475.17	0.0301368		4005.17	0.10015353
295.4	0.01462442		825.39	0.02295191		1355.39	0.06556013		1885.39	0.07621567		2415.38	0.01927416		2945.38	0.04827065		3475.37	0.0302869		4005.37	0.10016179
295.6	0.01512141		825.59	0.02322206		1355.59	0.06494315		1885.59	0.076953		2415.58	0.01946951		2945.58	0.04853012		3475.57	0.03162236		4005.57	0.10033727
295.8	0.01507175		825.79	0.0233911		1355.79	0.06622009		1885.79	0.07782823		2415.78	0.01969495		2945.78	0.04881837		3475.77	0.0321186		4005.77	0.10015435
296	0.01503883		825.99	0.02376564		1355.99	0.06651505		1885.99	0.0781823		2415.98	0.02019204		2945.98	0.04714832		3475.97	0.03237782		4005.97	0.0999453
296.2	0.01503695		826.19	0.02428727		1356.19	0.06691306		1886.19	0.07873621		2416.18	0.01980988		2946.18	0.0463961		3476.17	0.03226151		4006.17	0.09970693
296.4	0.01513629		826.39	0.02448894		1356.39	0.06728471		1886.39	0.0787619		2416.38	0.01949045		2946.38	0.04584956		3476.37	0.03155738		4006.37	0.09956056
296.6	0.0159163		826.59	0.02427535		1356.59	0.0667272		1886.59	0.07872591		2416.58	0.01902444		2946.58	0.04573081		3476.57	0.03054798		4006.57	0.09927169
296.8	0.01650167		826.79	0.02506115		1356.79	0.06663386		1886.79	0.0792481		2416.78	0.01886242		2946.78	0.04574476		3476.77	0.03027498		4006.77	0.10007822
297	0.01751653		826.99	0.02558693		1356.99	0.06665813		1886.99	0.07929195		2416.98	0.02025778		2946.98	0.04612037		3476.97	0.02985103		4006.97	0.0998707
297.2	0.01826795		827.19	0.02537765		1357.19	0.0659321		1887.19	0.08015642		2417.18	0.02142861		2947.18	0.04633247		3477.17	0.02868643		4007.17	0.10077149
297.4	0.01855968		827.39	0.02486001		1357.39	0.06640794		1887.39	0.07984928		2417.38	0.0215562		2947.38	0.04685879		3477.37	0.02758818		4007.37	0.10187223
297.6	0.01910566		827.59	0.02448086		1357.59	0.06675029		1887.59	0.08050843		2417.58	0.0217564		2947.58	0.0463029		3477.57	0.02778299		4007.57	0.10235951
297.8	0.01867205		827.79	0.02563495		1357.79	0.06786659		1887.79	0.08038011		2417.78	0.02274784		2947.78	0.04657647		3477.77	0.02764638		4007.77	0.1035175
298	0.01870329		827.99	0.02578425		1357.99	0.06852177		1887.99	0.08072238		2417.98	0.02204582		2947.98	0.04738429		3477.97	0.02778213		4007.97	0.10431623
298.2	0.01756773		828.19	0.02496665		1358.19	0.06990669		1888.19	0.08099181		2418.18	0.0220935		2948.18	0.04738822		3478.17	0.02824519		4008.17	0.10558269
298.4	0.01736653		828.39	0.02481134		1358.39	0.06934795		1888.39	0.08126171		2418.38	0.02220813		2948.38	0.04699308		3478.37	0.02844309		4008.37	0.10703391
298.6	0.01693903		828.59	0.02513558		1358.59	0.06980236		1888.59	0.08062006		2418.58	0.0212549		2948.58	0.04649763		3478.57	0.02829801		4008.57	0.10755049
298.8	0.01612795		828.79	0.02472423		1358.79	0.06959382		1888.79	0.07951425		2418.78	0.02042185		2948.78	0.04615671		3478.77	0.02877286		4008.77	0.10702904
299	0.0166134		828.99	0.02477636		1358.99	0.07049596		1888.99	0.07889657		2418.98	0.02067809		2948.98	0.04597104		3478.97	0.02895445		4008.97	0.10741715
299.2	0.01581163		829.19	0.02514791		1359.19	0.07021212		1889.19	0.07809395		2419.18	0.02131312		2949.18	0.04616773		3479.17	0.02932635		4009.17	0.10677942
299.4	0.01488493		829.39	0.02406574		1359.39	0.06877343		1889.39	0.0784179		2419.38	0.02152368		2949.38	0.04566031		3479.37	0.02972207		4009.37	0.10736097
299.6	0.01409855		829.59	0.023455		1359.59	0.06838611		1889.59	0.07885777		2419.58	0.0213357		2949.58	0.04563726		3479.57	0.03068576		4009.57	0.1066955
299.8	0.0134393		829.79	0.0231213		1359.79	0.06868184		1889.79	0.07890226		2419.78	0.02183088		2949.78	0.04562455		3479.77	0.03038322		4009.77	0.10642669
300	0.01306291		829.99	0.0236449		1359.99	0.06836532		1889.99	0.07862532		2419.98	0.02257685		2949.98	0.04518412		3479.97	0.03002008		4009.97	0.1059907
300.2	0.01286676		830.19	0.02352926		1360.19	0.06905068		1890.19	0.07788033		2420.18	0.02242611		2950.18	0.04586877		3480.17	0.02976168		4010.17	0.10603775
300.4	0.01348624		830.39	0.02321399		1360.39	0.0693038		1890.39	0.0774159		2420.38	0.02294867		2950.38	0.04700456		3480.37	0.02895534		4010.37	0.10640964
300.6	0.01485942		830.59	0.02255983		1360.59	0.06855454		1890.59	0.07740582		2420.58	0.02424895		2950.58	0.04804326		3480.57	0.02885557		4010.57	0.10535659
300.8	0.01566275		830.79	0.0223259		1360.79	0.06902351		1890.79	0.07789178		2420.78	0.02545594		2950.78	0.04840143		3480.77	0.02876389		4010.77	0.10557559
301	0.01620329		830.99	0.02198084		1360.99	0.06973023		1890.99	0.07882511		2420.98	0.02662737		2950.98	0.0485609		3480.97	0.02902396		4010.97	0.10536632
301.2	0.0158496		831.19	0.02178025		1361.19	0.0695594		1891.19	0.07978084		2421.18	0.02660779		2951.18	0.04956676		3481.17	0.02843706		4011.17	0.10572919
301.4	0.0157534		831.39	0.02142847		1361.39	0.06977404		1891.39	0.07933099		2421.38	0.02635902		2951.38	0.05028628		3481.37	0.0284289		4011.37	0.10611857
301.6	0.01603589		831.59	0.02190685		1361.59	0.06946983		1891.59	0.08008914		2421.58	0.02625424		2951.58	0.05064392		3481.57	0.02845574		4011.57	0.10662725
301.8	0.01589043		831.79	0.02175673		1361.79	0.06962511		1891.79	0.08118995		2421.78	0.02764691		2951.78	0.05177206		3481.77	0.02808586		4011.77	0.1071015
302	0.01647875		831.99	0.02251627		1361.99	0.06982329		1891.99	0.08262706		2421.98	0.02697415		2951.98	0.05212944		3481.97	0.02782884		4011.97	0.10800603
302.2	0.01710437		832.19	0.0221316		1362.19	0.0701064		1892.19	0.08327947		2422.18	0.027014		2952.18	0.0514689		3482.17	0.02707147		4012.17	0.10898028
302.4	0.01799413		832.39	0.02263607		1362.39	0.0696814		1892.39	0.0839958		2422.38	0.02724664		2952.38	0.05002591		3482.37	0.02749373		4012.37	0.10832757
302.6	0.01754698		832.59	0.02288381		1362.59	0.06979217		1892.59	0.08411827		2422.58	0.02696636		2952.58	0.04931984		3482.57	0.02789699		4012.57	0.10808645
302.8	0.01711004		832.79	0.02303476		1362.79	0.06996526		1892.79	0.08451166		2422.78	0.02581627		2952.78	0.04969112		3482.77	0.02848257		4012.77	0.10830094
303	0.01720315		832.99	0.02358338		1362.99	0.06951231		1892.99	0.08559203		2422.98	0.02531977		2952.98	0.0491597		3482.97	0.02919934		4012.97	0.1082078
303.2	0.01619919		833.19	0.02346354		1363.19	0.06842388		1893.19	0.08580642		2423.18	0.02491822		2953.18	0.04926236		3483.17	0.02983224		4013.17	0.10825385
303.4	0.01559848		833.39	0.02309116		1363.39	0.0693366		1893.39	0.08590399		2423.38	0.02432333		2953.38	0.04838338		3483.37	0.03008301		4013.37	0.10822404
303.6	0.01536966		833.59	0.02358574		1363.59	0.06972396		1893.59	0.08571583		2423.58	0.02335124		2953.58	0.04783761		3483.57	0.03146861		4013.57	0.10813788
303.8	0.01543966		833.79	0.02331283		1363.79	0.07024426		1893.79	0.08546348		2423.78	0.02307037		2953.78	0.04691453		3483.77	0.03144787		4013.77	0.10801268
304	0.01623228		833.99	0.02377398		1363.99	0.07089592		1893.99	0.08490905		2423.98	0.02311668		2953.98	0.04681276		3483.97	0.03096916		4013.97	0.1085094
304.2	0.01700212		834.19	0.02362388		1364.19	0.07163363		1894.19	0.08335183		2424.18	0.02275236		2954.18	0.04620093		3484.17	0.03110228		4014.17	0.1078292
304.4	0.01790384		834.39	0.02422792		1364.39	0.07197083		1894.39	0.0833483		2424.38	0.02308772		2954.38	0.04716487		3484.37	0.03153702		4014.37	0.10739963
304.6	0.01819676		834.59	0.02303182		1364.59	0.07240072		1894.59	0.08318659		2424.58	0.02280533		2954.58	0.04673252		3484.57	0.03172429		4014.57	0.10683081
304.8	0.01844742		834.79	0.0233717		1364.79	0.07240116		1894.79	0.08359448		2424.78	0.02322952		2954.78	0.0476846		3484.77	0.03157807		4014.77	0.10689681
305	0.01853389		834.99	0.02359989		1364.99	0.07159396		1894.99	0.08334144		2424.98	0.02308374		2954.98	0.0478617		3484.97	0.03181956		4014.97	0.10632204
305.2	0.01900884		835.19	0.02343852		1365.19	0.07095248		1895.19	0.08292021		2425.18	0.02284134		2955.18	0.0489445		3485.17	0.0319561		4015.17	0.10672494
305.4	0.02031967		835.39	0.02358987		1365.39	0.07066		1895.39	0.08266731		2425.38	0.02310008		2955.38	0.04881636		3485.37	0.03272686		4015.37	0.10746478
305.6	0.02083602		835.59	0.02429843		1365.59	0.07068399		1895.59	0.08340341		2425.58	0.02453799		2955.58	0.04927776		3485.57	0.03207507		4015.57	0.10859283
305.8	0.02068759		835.79	0.02386686		1365.79	0.07084208		1895.79	0.08457924		2425.78	0.02549694		2955.78	0.04899274		3485.77	0.0312089		4015.77	0.10924301
306	0.02110472		835.99	0.02431615		1365.99	0.06974989		1895.99	0.08493309		2425.98	0.02509143		2955.98	0.04866005		3485.97	0.03056159		4015.97	0.10982379
306.2	0.02126185		836.19	0.02358111		1366.19	0.06952436		1896.19	0.08516326		2426.18	0.02496946		2956.18	0.04859079		3486.17	0.03047933		4016.17	0.10909136
306.4	0.02012145		836.39	0.0239697		1366.39	0.06905773		1896.39	0.08487102		2426.38	0.02495036		2956.38	0.04886188		3486.37	0.03142052		4016.37	0.1089633
306.6	0.01970169		836.59	0.02428363		1366.59	0.0691581		1896.59	0.08461447		2426.58	0.02530412		2956.58	0.04971633		3486.57	0.03138819		4016.57	0.11010749
306.8	0.01939573		836.79	0.02407418		1366.79	0.06996044		1896.79	0.08414497		2426.78	0.0246298		2956.78	0.04953039		3486.77	0.03207935		4016.77	0.11129827
307	0.01874568		836.99	0.02390571		1366.99	0.07064164		1896.99	0.08468706		2426.98	0.02486475		2956.98	0.04978057		3486.97	0.03207103		4016.97	0.11165727
307.2	0.01774565		837.19	0.02427182		1367.19	0.07113762		1897.19	0.08408922		2427.18	0.02531345		2957.18	0.05075245		3487.17	0.03230878		4017.17	0.11267953
307.4	0.01758372		837.39	0.02455627		1367.39	0.07259517		1897.39	0.08323274		2427.38	0.02543544		2957.38	0.05123331		3487.37	0.0320438		4017.37	0.11247559
307.6	0.01754118		837.59	0.02510408		1367.59	0.07248636		1897.59	0.08323394		2427.58	0.02538084		2957.58	0.05078183		3487.57	0.03308016		4017.57	0.1128008
307.8	0.01793411		837.79	0.02487176		1367.79	0.07317545		1897.79	0.08300968		2427.78	0.02547291		2957.78	0.04946586		3487.77	0.03224597		4017.77	0.11220002
308	0.01831794		837.99	0.02519853		1367.99	0.07384363		1897.99	0.08254661		2427.98	0.02508453		2957.98	0.04990208		3487.97	0.03173872		4017.97	0.11293009
308.2	0.01844323		838.19	0.02550148		1368.19	0.07359492		1898.19	0.0809372		2428.18	0.0251968		2958.18	0.05011872		3488.17	0.03242544		4018.17	0.11215449
308.4	0.01812108		838.39	0.02550506		1368.39	0.07370174		1898.39	0.08106767		2428.38	0.02566806		2958.38	0.05068949		3488.37	0.03264651		4018.37	0.11210607
308.6	0.01854351		838.59	0.0251639		1368.59	0.07348355		1898.59	0.08138823		2428.58	0.02613467		2958.58	0.05106221		3488.57	0.03244899		4018.57	0.11187031
308.8	0.0193563		838.79	0.02565044		1368.79	0.07208046		1898.79	0.08122325		2428.78	0.02726406		2958.78	0.05197521		3488.77	0.03258103		4018.77	0.11183593
309	0.01896318		838.99	0.02511298		1368.99	0.07094761		1898.99	0.08057438		2428.98	0.02790229		2958.98	0.05201288		3488.97	0.03260382		4018.97	0.11159463
309.2	0.01966079		839.19	0.02542764		1369.19	0.07112301		1899.19	0.08048193		2429.18	0.02799393		2959.18	0.05276006		3489.17	0.03261925		4019.17	0.11142831
309.4	0.02021521		839.39	0.02577633		1369.39	0.0710889		1899.39	0.08117289		2429.38	0.02810507		2959.38	0.05232695		3489.37	0.03282628		4019.37	0.1120811
309.6	0.01996515		839.59	0.02622001		1369.59	0.06977434		1899.59	0.0821987		2429.58	0.02813602		2959.58	0.05199663		3489.57	0.03187823		4019.57	0.11210429
309.8	0.01953886		839.79	0.02501857		1369.79	0.06885222		1899.79	0.08277889		2429.78	0.027948		2959.78	0.05166857		3489.77	0.03139694		4019.77	0.11198718
310	0.02000196		839.99	0.02484236		1369.99	0.06858571		1899.99	0.082684		2429.98	0.02820847		2959.98	0.05143651		3489.97	0.03070736		4019.97	0.11187903
310.2	0.01910899		840.19	0.02401624		1370.19	0.06920565		1900.19	0.08245024		2430.18	0.02808386		2960.18	0.05110395		3490.17	0.03123478		4020.17	0.11143933
310.4	0.01846532		840.39	0.02364315		1370.39	0.06893474		1900.39	0.08373664		2430.38	0.02837845		2960.38	0.05046616		3490.37	0.03140158		4020.37	0.11277008
310.6	0.01880395		840.59	0.02313404		1370.59	0.06915095		1900.59	0.08528432		2430.58	0.02817049		2960.58	0.04907798		3490.57	0.03082103		4020.57	0.11310267
310.8	0.01851702		840.79	0.02253387		1370.79	0.06907509		1900.79	0.08570213		2430.78	0.02757047		2960.78	0.04844348		3490.77	0.03089207		4020.77	0.11422712
311	0.01871791		840.99	0.02235067		1370.99	0.0693934		1900.99	0.0875135		2430.98	0.02705179		2960.98	0.04938425		3490.97	0.03023567		4020.97	0.11480152
311.2	0.01805417		841.19	0.02275964		1371.19	0.06958069		1901.19	0.08856267		2431.18	0.02743592		2961.18	0.04958221		3491.17	0.03011094		4021.17	0.11573827
311.4	0.01872468		841.39	0.022757		1371.39	0.0705049		1901.39	0.0895105		2431.38	0.02711919		2961.38	0.04945586		3491.37	0.03044156		4021.37	0.11628949
311.6	0.02002086		841.59	0.02263564		1371.59	0.07058227		1901.59	0.09002073		2431.58	0.02701079		2961.58	0.04855621		3491.57	0.03128574		4021.57	0.11601091
311.8	0.02099279		841.79	0.02227159		1371.79	0.07139823		1901.79	0.08960461		2431.78	0.0260362		2961.78	0.04833931		3491.77	0.03152428		4021.77	0.1156704
312	0.02067043		841.99	0.02227715		1371.99	0.07248893		1901.99	0.08910464		2431.98	0.02525751		2961.98	0.04886954		3491.97	0.03179595		4021.97	0.11608913
312.2	0.02127461		842.19	0.02284274		1372.19	0.07302032		1902.19	0.08890418		2432.18	0.02540728		2962.18	0.04963583		3492.17	0.03307167		4022.17	0.1155708
312.4	0.0211529		842.39	0.02337039		1372.39	0.07339095		1902.39	0.08865875		2432.38	0.02638905		2962.38	0.05020957		3492.37	0.03281246		4022.37	0.1153477
312.6	0.02160802		842.59	0.02299509		1372.59	0.07318152		1902.59	0.08805689		2432.58	0.02716584		2962.58	0.05257583		3492.57	0.03318678		4022.57	0.11444152
312.8	0.02099694		842.79	0.02278707		1372.79	0.07311937		1902.79	0.08715064		2432.78	0.02634806		2962.78	0.05419229		3492.77	0.03384058		4022.77	0.11431471
313	0.02151393		842.99	0.02307206		1372.99	0.07358122		1902.99	0.0863829		2432.98	0.0256012		2962.98	0.05473233		3492.97	0.03438824		4022.97	0.11399441
313.2	0.02172682		843.19	0.02331831		1373.19	0.07412691		1903.19	0.08628731		2433.18	0.02548993		2963.18	0.05572143		3493.17	0.03480476		4023.17	0.11347621
313.4	0.02196003		843.39	0.02280822		1373.39	0.07304506		1903.39	0.08695797		2433.38	0.02490763		2963.38	0.05591922		3493.37	0.03546141		4023.37	0.11336836
313.6	0.02248225		843.59	0.02342947		1373.59	0.07333441		1903.59	0.08771949		2433.58	0.02436691		2963.58	0.05644948		3493.57	0.03505175		4023.57	0.11289432
313.8	0.02123225		843.79	0.02308523		1373.79	0.07376049		1903.79	0.08679682		2433.78	0.02534412		2963.78	0.05707941		3493.77	0.03462708		4023.77	0.11293678
314	0.02050275		843.99	0.02266312		1373.99	0.07451007		1903.99	0.08601306		2433.98	0.02642107		2963.98	0.0563523		3493.97	0.03371931		4023.97	0.11352923
314.2	0.01975966		844.19	0.02213671		1374.19	0.07446717		1904.19	0.08649053		2434.18	0.02661296		2964.18	0.05569818		3494.17	0.03438673		4024.17	0.11405055
314.4	0.01853041		844.39	0.0229388		1374.39	0.07436314		1904.39	0.08790841		2434.38	0.02720934		2964.38	0.05524055		3494.37	0.03403761		4024.37	0.11547937
314.6	0.01803285		844.59	0.02317447		1374.59	0.07369925		1904.59	0.08816491		2434.58	0.02705038		2964.58	0.05473587		3494.57	0.03247759		4024.57	0.11674536
314.8	0.01818167		844.79	0.02334892		1374.79	0.07311363		1904.79	0.08821465		2434.78	0.02753671		2964.78	0.05546629		3494.77	0.03253808		4024.77	0.11856112
315	0.01825622		844.99	0.02302627		1374.99	0.07299728		1904.99	0.08832795		2434.98	0.0270386		2964.98	0.0550452		3494.97	0.03244629		4024.97	0.11954443
315.2	0.01735689		845.19	0.02338672		1375.19	0.07307297		1905.19	0.08925969		2435.18	0.02825907		2965.18	0.05441559		3495.17	0.0334186		4025.17	0.11996926
315.4	0.01734547		845.39	0.02397036		1375.39	0.07391378		1905.39	0.0886056		2435.38	0.02795105		2965.38	0.05424475		3495.37	0.0331		4025.37	0.12010551
315.6	0.01773746		845.59	0.02334198		1375.59	0.0737241		1905.59	0.08889079		2435.58	0.02813829		2965.58	0.05448511		3495.57	0.03288513		4025.57	0.11985487
315.8	0.01771591		845.79	0.02371084		1375.79	0.07455396		1905.79	0.08833391		2435.78	0.02738696		2965.78	0.05427718		3495.77	0.03399406		4025.77	0.1200053
316	0.01715577		845.99	0.02344368		1375.99	0.07568165		1905.99	0.08819905		2435.98	0.02802939		2965.98	0.05364787		3495.97	0.03475722		4025.97	0.12039428
316.2	0.0177398		846.19	0.02333849		1376.19	0.07649513		1906.19	0.08791584		2436.18	0.02813272		2966.18	0.05377606		3496.17	0.03499091		4026.17	0.12078029
316.4	0.01745951		846.39	0.02326127		1376.39	0.07638568		1906.39	0.08724105		2436.38	0.02903486		2966.38	0.05402144		3496.37	0.03457038		4026.37	0.12024115
316.6	0.01797752		846.59	0.02182812		1376.59	0.07617232		1906.59	0.08720883		2436.58	0.02859844		2966.58	0.05581048		3496.57	0.03509519		4026.57	0.12060943
316.8	0.01814312		846.79	0.02113628		1376.79	0.0772503		1906.79	0.08702729		2436.78	0.02780612		2966.78	0.05585362		3496.77	0.03575702		4026.77	0.12039968
317	0.01890785		846.99	0.02053529		1376.99	0.07744688		1906.99	0.087214		2436.98	0.0276962		2966.98	0.05602926		3496.97	0.03560104		4026.97	0.12048871
317.2	0.01799861		847.19	0.01968334		1377.19	0.07704261		1907.19	0.08769826		2437.18	0.02871096		2967.18	0.05669951		3497.17	0.03589249		4027.17	0.11939606
317.4	0.01890555		847.39	0.01950188		1377.39	0.07687418		1907.39	0.08766175		2437.38	0.0278379		2967.38	0.05713659		3497.37	0.0355471		4027.37	0.11891669
317.6	0.01882882		847.59	0.01950617		1377.59	0.07789436		1907.59	0.08765696		2437.58	0.02815372		2967.58	0.05753056		3497.57	0.03430906		4027.57	0.11896391
317.8	0.01743852		847.79	0.01926349		1377.79	0.07757233		1907.79	0.08685756		2437.78	0.02867848		2967.78	0.05761755		3497.77	0.03412716		4027.77	0.11836947
318	0.01708858		847.99	0.01969167		1377.99	0.07741895		1907.99	0.08701982		2437.98	0.02986868		2967.98	0.05683638		3497.97	0.03359295		4027.97	0.11841332
318.2	0.0170133		848.19	0.02039914		1378.19	0.07754238		1908.19	0.08703196		2438.18	0.02967673		2968.18	0.05673749		3498.17	0.03312096		4028.17	0.11856971
318.4	0.01595265		848.39	0.0214253		1378.39	0.07665509		1908.39	0.0870649		2438.38	0.02893917		2968.38	0.05690775		3498.37	0.03339864		4028.37	0.11940997
318.6	0.01647447		848.59	0.02188872		1378.59	0.07648476		1908.59	0.0877537		2438.58	0.02775852		2968.58	0.0568026		3498.57	0.03269756		4028.57	0.11990997
318.8	0.01600883		848.79	0.02150079		1378.79	0.07628688		1908.79	0.08780018		2438.78	0.02636613		2968.78	0.05609204		3498.77	0.03345145		4028.77	0.11936427
319	0.0159093		848.99	0.02207513		1378.99	0.07627694		1908.99	0.08826447		2438.98	0.0259325		2968.98	0.0556218		3498.97	0.03396956		4028.97	0.11884614
319.2	0.0158343		849.19	0.02288329		1379.19	0.07656033		1909.19	0.08992287		2439.18	0.02693379		2969.18	0.05567646		3499.17	0.03406734		4029.17	0.11867589
319.4	0.01601816		849.39	0.02415787		1379.39	0.07702623		1909.39	0.08933745		2439.38	0.02633675		2969.38	0.05531021		3499.37	0.03301719		4029.37	0.11904467
319.6	0.01738928		849.59	0.02468046		1379.59	0.07691925		1909.59	0.09049958		2439.58	0.02628749		2969.58	0.05498389		3499.57	0.03314243		4029.57	0.11925829
319.8	0.01764746		849.79	0.02573632		1379.79	0.07715153		1909.79	0.08972512		2439.78	0.02659112		2969.78	0.05437777		3499.77	0.03487241		4029.77	0.11898583
320	0.01781553		849.99	0.02594515		1379.99	0.07756545		1909.99	0.08926939		2439.98	0.02764994		2969.98	0.05409433		3499.97	0.03479157		4029.97	0.11899848
320.2	0.01811639		850.19	0.02571261		1380.19	0.07775117		1910.19	0.08971727		2440.18	0.02808484		2970.18	0.05459901		3500.17	0.03432712		4030.17	0.11969174
320.4	0.01801715		850.39	0.02580593		1380.39	0.07725916		1910.39	0.08943995		2440.38	0.0284335		2970.38	0.05549061		3500.37	0.03473112		4030.37	0.11996336
320.6	0.01866498		850.59	0.02509229		1380.59	0.0769694		1910.59	0.08945652		2440.58	0.02899112		2970.58	0.05676632		3500.57	0.03514199		4030.57	0.12092591
320.8	0.01887235		850.79	0.02420588		1380.79	0.07784488		1910.79	0.08909352		2440.78	0.03008723		2970.78	0.0571084		3500.77	0.03525502		4030.77	0.12009442
321	0.01907329		850.99	0.02453189		1380.99	0.07820185		1910.99	0.08934913		2440.98	0.03050211		2970.98	0.05813287		3500.97	0.03639267		4030.97	0.120745
321.2	0.0187106		851.19	0.02433663		1381.19	0.07799684		1911.19	0.0894206		2441.18	0.0307086		2971.18	0.0584385		3501.17	0.03683502		4031.17	0.11998139
321.4	0.01898754		851.39	0.02461262		1381.39	0.07747089		1911.39	0.08920344		2441.38	0.03068377		2971.38	0.05864106		3501.37	0.03642094		4031.37	0.12038409
321.6	0.01873066		851.59	0.02511259		1381.59	0.07759493		1911.59	0.08952996		2441.58	0.03166641		2971.58	0.0589795		3501.57	0.03759241		4031.57	0.12042408
321.8	0.01855197		851.79	0.02537946		1381.79	0.07785395		1911.79	0.08921139		2441.78	0.03191018		2971.78	0.05799914		3501.77	0.0377331		4031.77	0.12073485
322	0.01899231		851.99	0.02499487		1381.99	0.07809448		1911.99	0.089865		2441.98	0.03251664		2971.98	0.05782166		3501.97	0.037507		4031.97	0.12068936
322.2	0.01964158		852.19	0.02527133		1382.19	0.07791648		1912.19	0.09040966		2442.18	0.03230825		2972.18	0.05743678		3502.17	0.0379145		4032.17	0.12116186
322.4	0.01988499		852.39	0.02432714		1382.39	0.0779881		1912.39	0.09164941		2442.38	0.03111801		2972.38	0.05648426		3502.37	0.03863261		4032.37	0.12190423
322.6	0.02045131		852.59	0.02381244		1382.59	0.07885593		1912.59	0.09294947		2442.58	0.03097286		2972.58	0.05493748		3502.57	0.03828486		4032.57	0.12164782
322.8	0.02055618		852.79	0.02359533		1382.79	0.07872639		1912.79	0.09267643		2442.78	0.03072246		2972.78	0.05462796		3502.77	0.03822097		4032.77	0.12149863
323	0.02185654		852.99	0.02469503		1382.99	0.07889338		1912.99	0.09353101		2442.98	0.03197699		2972.98	0.05446887		3502.97	0.03756878		4032.97	0.12166041
323.2	0.0226341		853.19	0.02507473		1383.19	0.07903839		1913.19	0.09335546		2443.18	0.03268432		2973.18	0.05369494		3503.17	0.03703928		4033.17	0.12200609
323.4	0.0235805		853.39	0.02555315		1383.39	0.0794491		1913.39	0.09343227		2443.38	0.03210814		2973.38	0.05335476		3503.37	0.03614673		4033.37	0.12255404
323.6	0.02436893		853.59	0.02497423		1383.59	0.07944531		1913.59	0.09275909		2443.58	0.0317963		2973.58	0.05386448		3503.57	0.03614213		4033.57	0.12282403
323.8	0.02426359		853.79	0.02489491		1383.79	0.0795019		1913.79	0.0914151		2443.78	0.03254283		2973.78	0.05440566		3503.77	0.03673691		4033.77	0.12262228
324	0.02417229		853.99	0.02414276		1383.99	0.0796493		1913.99	0.09123992		2443.98	0.03243393		2973.98	0.05555696		3503.97	0.03593245		4033.97	0.1235639
324.2	0.02394087		854.19	0.02401434		1384.19	0.07938305		1914.19	0.09133072		2444.18	0.03239406		2974.18	0.05628886		3504.17	0.03534942		4034.17	0.12361184
324.4	0.02402919		854.39	0.02387127		1384.39	0.07888286		1914.39	0.09058245		2444.38	0.03208353		2974.38	0.05627434		3504.37	0.03522187		4034.37	0.12406693
324.6	0.02392858		854.59	0.02406414		1384.59	0.07881386		1914.59	0.09031061		2444.58	0.03282666		2974.58	0.05681278		3504.57	0.03508474		4034.57	0.12429414
324.8	0.02296347		854.79	0.02404691		1384.79	0.07966006		1914.79	0.08910657		2444.78	0.03299576		2974.78	0.05774522		3504.77	0.03466522		4034.77	0.12367415
325	0.02228427		854.99	0.02504312		1384.99	0.08047389		1914.99	0.08966869		2444.98	0.03220909		2974.98	0.05827678		3504.97	0.03450435		4034.97	0.12343494
325.2	0.02166022		855.19	0.02535709		1385.19	0.07986701		1915.19	0.09034663		2445.18	0.03205675		2975.18	0.05863401		3505.17	0.03336404		4035.17	0.1237298
325.4	0.020444		855.39	0.02594349		1385.39	0.07970504		1915.39	0.09037676		2445.38	0.032409		2975.38	0.05889689		3505.37	0.03329549		4035.37	0.12425971
325.6	0.01927591		855.59	0.0258773		1385.59	0.08023496		1915.59	0.0908943		2445.58	0.03193541		2975.58	0.05927996		3505.57	0.0341663		4035.57	0.12513375
325.8	0.01801474		855.79	0.02521407		1385.79	0.07938332		1915.79	0.09117062		2445.78	0.03218429		2975.78	0.05886893		3505.77	0.03359224		4035.77	0.12531738
326	0.01722679		855.99	0.0249547		1385.99	0.07880154		1915.99	0.09148426		2445.98	0.03248407		2975.98	0.05941592		3505.97	0.03360071		4035.97	0.12545146
326.2	0.01606768		856.19	0.02504454		1386.19	0.07825997		1916.19	0.0912684		2446.18	0.03294322		2976.18	0.05877405		3506.17	0.03389176		4036.17	0.12581451
326.4	0.01574034		856.39	0.02393076		1386.39	0.07916396		1916.39	0.09142397		2446.38	0.03285831		2976.38	0.05837692		3506.37	0.03415594		4036.37	0.12593774
326.6	0.01662081		856.59	0.02449214		1386.59	0.07859458		1916.59	0.09169086		2446.58	0.03327241		2976.58	0.0584318		3506.57	0.03412566		4036.57	0.12630763
326.8	0.01710805		856.79	0.02451094		1386.79	0.07751404		1916.79	0.09121782		2446.78	0.03323217		2976.78	0.05873916		3506.77	0.03328876		4036.77	0.12689914
327	0.01682981		856.99	0.02450876		1386.99	0.0780857		1916.99	0.09170031		2446.98	0.03370339		2976.98	0.05832849		3506.97	0.03284943		4036.97	0.12685146
327.2	0.01615871		857.19	0.0236518		1387.19	0.07771525		1917.19	0.09194742		2447.18	0.03286087		2977.18	0.05890887		3507.17	0.03336158		4037.17	0.12768196
327.4	0.01627064		857.39	0.02312626		1387.39	0.07770598		1917.39	0.09251956		2447.38	0.03212566		2977.38	0.05936637		3507.37	0.03379358		4037.37	0.12859174
327.6	0.01689339		857.59	0.02269322		1387.59	0.07777653		1917.59	0.09164242		2447.58	0.03140755		2977.58	0.05932302		3507.57	0.03454156		4037.57	0.12905407
327.8	0.01775226		857.79	0.02335021		1387.79	0.07799107		1917.79	0.09197268		2447.78	0.03165372		2977.78	0.05907772		3507.77	0.03473431		4037.77	0.12969289
328	0.01830127		857.99	0.02301269		1387.99	0.07835518		1917.99	0.09220661		2447.98	0.03115607		2977.98	0.05999875		3507.97	0.03490845		4037.97	0.13036652
328.2	0.01926759		858.19	0.02358931		1388.19	0.07863676		1918.19	0.09230983		2448.18	0.03137711		2978.18	0.06025253		3508.17	0.03508869		4038.17	0.12951112
328.4	0.02015284		858.39	0.02375815		1388.39	0.07926554		1918.39	0.09222838		2448.38	0.0310161		2978.38	0.05951257		3508.37	0.03480059		4038.37	0.13062159
328.6	0.02022718		858.59	0.02556661		1388.59	0.08146739		1918.59	0.09175023		2448.58	0.03129573		2978.58	0.05944974		3508.57	0.0353182		4038.57	0.1305937
328.8	0.0211055		858.79	0.02591141		1388.79	0.08204401		1918.79	0.0923022		2448.78	0.03130675		2978.78	0.060255		3508.77	0.03512356		4038.77	0.12942653
329	0.02180423		858.99	0.0265836		1388.99	0.08286708		1918.99	0.09416879		2448.98	0.03067676		2978.98	0.06041338		3508.97	0.03468644		4038.97	0.12970505
329.2	0.02224797		859.19	0.02734567		1389.19	0.08276165		1919.19	0.09593261		2449.18	0.03086566		2979.18	0.06111866		3509.17	0.03516564		4039.17	0.1297595
329.4	0.02167693		859.39	0.02767525		1389.39	0.08289012		1919.39	0.09672544		2449.38	0.03058153		2979.38	0.06227264		3509.37	0.03567222		4039.37	0.12958891
329.6	0.02134419		859.59	0.02794023		1389.59	0.08262935		1919.59	0.09696478		2449.58	0.03101809		2979.58	0.06210227		3509.57	0.03669504		4039.57	0.12862088
329.8	0.0216697		859.79	0.02848209		1389.79	0.0833652		1919.79	0.0968949		2449.78	0.03216433		2979.78	0.06151593		3509.77	0.03716712		4039.77	0.12760547
330	0.02193447		859.99	0.02890251		1389.99	0.08335763		1919.99	0.0965742		2449.98	0.032642		2979.98	0.0613332		3509.97	0.03741167		4039.97	0.12708351
330.2	0.02216604		860.19	0.0286393		1390.19	0.08441953		1920.19	0.09665125		2450.18	0.03347755		2980.18	0.06147403		3510.17	0.03776601		4040.17	0.12614013
330.4	0.02262173		860.39	0.02893725		1390.39	0.08457748		1920.39	0.09731099		2450.38	0.03380244		2980.38	0.06171614		3510.37	0.03818439		4040.37	0.12534608
330.6	0.02361825		860.59	0.02938111		1390.59	0.08332451		1920.59	0.09732345		2450.58	0.03471148		2980.58	0.06094662		3510.57	0.03816235		4040.57	0.12533779
330.8	0.02254998		860.79	0.02859416		1390.79	0.08306498		1920.79	0.09693424		2450.78	0.03486392		2980.78	0.06013456		3510.77	0.03788263		4040.77	0.12463175
331	0.02162483		860.99	0.02795517		1390.99	0.08419082		1920.99	0.09691893		2450.98	0.03505478		2980.98	0.05971681		3510.97	0.03838535		4040.97	0.12404343
331.2	0.02163172		861.19	0.02672965		1391.19	0.08396722		1921.19	0.09750737		2451.18	0.03459817		2981.18	0.05968187		3511.17	0.03892358		4041.17	0.12413038
331.4	0.02175973		861.39	0.02610034		1391.39	0.08389728		1921.39	0.09649823		2451.38	0.03529933		2981.38	0.05934567		3511.37	0.03934678		4041.37	0.12417434
331.6	0.0220279		861.59	0.02597323		1391.59	0.08430394		1921.59	0.09585778		2451.58	0.03452385		2981.58	0.05926401		3511.57	0.03916011		4041.57	0.12445318
331.8	0.02288867		861.79	0.02595573		1391.79	0.08427284		1921.79	0.0953524		2451.78	0.0341051		2981.78	0.05977764		3511.77	0.03943555		4041.77	0.12512162
332	0.02340127		861.99	0.0255323		1391.99	0.08441604		1921.99	0.09437932		2451.98	0.03364475		2981.98	0.06051899		3511.97	0.03997766		4041.97	0.1259961
332.2	0.02392873		862.19	0.02598551		1392.19	0.08453596		1922.19	0.09421247		2452.18	0.03364826		2982.18	0.06033711		3512.17	0.04033293		4042.17	0.12687692
332.4	0.02388589		862.39	0.02641346		1392.39	0.08491983		1922.39	0.09344873		2452.38	0.03281717		2982.38	0.05976798		3512.37	0.03982844		4042.37	0.12892365
332.6	0.02455021		862.59	0.02746245		1392.59	0.08526122		1922.59	0.09290807		2452.58	0.03202404		2982.58	0.06054356		3512.57	0.04063787		4042.57	0.12963981
332.8	0.02567582		862.79	0.02667966		1392.79	0.08444415		1922.79	0.09354635		2452.78	0.03115456		2982.78	0.0612806		3512.77	0.04024138		4042.77	0.13034991
333	0.02508073		862.99	0.02684816		1392.99	0.08515007		1922.99	0.09416881		2452.98	0.03072892		2982.98	0.06196002		3512.97	0.03953579		4042.97	0.13111498
333.2	0.02522444		863.19	0.02672027		1393.19	0.08500286		1923.19	0.09437122		2453.18	0.03056112		2983.18	0.06228487		3513.17	0.03882325		4043.17	0.13140671
333.4	0.02472758		863.39	0.02678849		1393.39	0.0842495		1923.39	0.09415412		2453.38	0.03087497		2983.38	0.06198259		3513.37	0.03871625		4043.37	0.13198438
333.6	0.02439553		863.59	0.02711651		1393.59	0.08443776		1923.59	0.09399675		2453.58	0.03106767		2983.58	0.06093743		3513.57	0.03922845		4043.57	0.13117408
333.8	0.02424246		863.79	0.02824924		1393.79	0.08573256		1923.79	0.09534003		2453.78	0.0313113		2983.78	0.0609235		3513.77	0.03950963		4043.77	0.131858
334	0.02343488		863.99	0.02829021		1393.99	0.08517983		1923.99	0.09523285		2453.98	0.03130903		2983.98	0.06081762		3513.97	0.04005208		4043.97	0.13232178
334.2	0.02286729		864.19	0.0286792		1394.19	0.08624017		1924.19	0.09557867		2454.18	0.03124018		2984.18	0.06058895		3514.17	0.04061801		4044.17	0.13179391
334.4	0.02203925		864.39	0.02888468		1394.39	0.08655899		1924.39	0.09667087		2454.38	0.03138397		2984.38	0.06067969		3514.37	0.04095905		4044.37	0.13171694
334.6	0.02204052		864.59	0.02868214		1394.59	0.08708101		1924.59	0.09691193		2454.58	0.03210683		2984.58	0.0599255		3514.57	0.04138156		4044.57	0.13211546
334.8	0.02125808		864.79	0.02725648		1394.79	0.08738939		1924.79	0.09703594		2454.78	0.03237603		2984.78	0.059377		3514.77	0.04174881		4044.77	0.13214002
335	0.02092067		864.99	0.02644949		1394.99	0.08806501		1924.99	0.09766569		2454.98	0.03282782		2984.98	0.05939725		3514.97	0.04193883		4044.97	0.13215748
335.2	0.02114779		865.19	0.02582384		1395.19	0.08888274		1925.19	0.09789813		2455.18	0.03236913		2985.18	0.0599346		3515.17	0.04202421		4045.17	0.13180343
335.4	0.0212491		865.39	0.02569675		1395.39	0.08895697		1925.39	0.09799679		2455.38	0.03268519		2985.38	0.06008463		3515.37	0.04299778		4045.37	0.13155119
335.6	0.02180387		865.59	0.02586828		1395.59	0.08895805		1925.59	0.09814103		2455.58	0.0322585		2985.58	0.06017427		3515.57	0.04238749		4045.57	0.13131312
335.8	0.02286139		865.79	0.02668107		1395.79	0.08903379		1925.79	0.09843949		2455.78	0.03194804		2985.78	0.060686		3515.77	0.04251763		4045.77	0.13127156
336	0.02337288		865.99	0.0265424		1395.99	0.08856794		1925.99	0.09879169		2455.98	0.03270992		2985.98	0.06058668		3515.97	0.0420565		4045.97	0.1319738
336.2	0.02402504		866.19	0.02634327		1396.19	0.08833399		1926.19	0.09925972		2456.18	0.03231453		2986.18	0.06061749		3516.17	0.04165561		4046.17	0.13161738
336.4	0.02489795		866.39	0.02600099		1396.39	0.08814499		1926.39	0.09871218		2456.38	0.03133711		2986.38	0.06084668		3516.37	0.04099877		4046.37	0.13183133
336.6	0.02618931		866.59	0.0261551		1396.59	0.08807691		1926.59	0.09863181		2456.58	0.03081695		2986.58	0.06139737		3516.57	0.04145113		4046.57	0.1325521
336.8	0.0266448		866.79	0.02558617		1396.79	0.08790722		1926.79	0.09849864		2456.78	0.03197932		2986.78	0.06097657		3516.77	0.04089173		4046.77	0.13234597
337	0.02600777		866.99	0.02466578		1396.99	0.08729447		1926.99	0.0979225		2456.98	0.03197667		2986.98	0.06105005		3516.97	0.04044464		4046.97	0.13200407
337.2	0.02597986		867.19	0.02428369		1397.19	0.08605992		1927.19	0.09739081		2457.18	0.03294693		2987.18	0.06017359		3517.17	0.03921563		4047.17	0.13220968
337.4	0.02571126		867.39	0.02469601		1397.39	0.08534586		1927.39	0.09755039		2457.38	0.03366651		2987.38	0.06065885		3517.37	0.03980306		4047.37	0.13218183
337.6	0.0251317		867.59	0.02461457		1397.59	0.08611285		1927.59	0.09815403		2457.58	0.03372513		2987.58	0.06081215		3517.57	0.03913113		4047.57	0.1325866
337.8	0.02400559		867.79	0.02519643		1397.79	0.08648677		1927.79	0.09867307		2457.78	0.03410762		2987.78	0.06071543		3517.77	0.03916666		4047.77	0.13337507
338	0.02362709		867.99	0.02434329		1397.99	0.08621404		1927.99	0.09854125		2457.98	0.03473177		2987.98	0.06047634		3517.97	0.03908255		4047.97	0.13326411
338.2	0.02393571		868.19	0.02438263		1398.19	0.08585151		1928.19	0.09913079		2458.18	0.03488015		2988.18	0.06084325		3518.17	0.03939719		4048.17	0.13360064
338.4	0.02286601		868.39	0.02387303		1398.39	0.08619341		1928.39	0.10029965		2458.38	0.03548932		2988.38	0.06115038		3518.37	0.03988512		4048.37	0.13473952
338.6	0.02258388		868.59	0.02392071		1398.59	0.08586175		1928.59	0.10016049		2458.58	0.03549279		2988.58	0.06124783		3518.57	0.0405928		4048.57	0.13579137
338.8	0.02290505		868.79	0.02366507		1398.79	0.08550123		1928.79	0.10022295		2458.78	0.03580472		2988.78	0.06054095		3518.77	0.04105338		4048.77	0.13624239
339	0.02297052		868.99	0.02496566		1398.99	0.08616767		1928.99	0.10025839		2458.98	0.03519682		2988.98	0.0611605		3518.97	0.04144538		4048.97	0.13640148
339.2	0.02381964		869.19	0.02599193		1399.19	0.08729719		1929.19	0.09958672		2459.18	0.0348367		2989.18	0.06102375		3519.17	0.0419608		4049.17	0.13626801
339.4	0.02450042		869.39	0.02592753		1399.39	0.08735699		1929.39	0.09934705		2459.38	0.03555324		2989.38	0.06136845		3519.37	0.04259284		4049.37	0.13568714
339.6	0.02468431		869.59	0.02677609		1399.59	0.08767876		1929.59	0.09907591		2459.58	0.03555024		2989.58	0.06153805		3519.57	0.04193304		4049.57	0.13542846
339.8	0.02547909		869.79	0.02668983		1399.79	0.08832245		1929.79	0.09931747		2459.78	0.03521188		2989.78	0.0612555		3519.77	0.04227914		4049.77	0.13510201
340	0.02557114		869.99	0.02666538		1399.99	0.0876652		1929.99	0.0992549		2459.98	0.03480492		2989.98	0.06154271		3519.97	0.04163661		4049.97	0.13497482
340.2	0.02687857		870.19	0.02786663		1400.19	0.08805557		1930.19	0.0985301		2460.18	0.03337423		2990.18	0.06232237		3520.17	0.04108397		4050.17	0.13462606
340.4	0.02799462		870.39	0.02816416		1400.39	0.08910546		1930.39	0.09829177		2460.38	0.03347851		2990.38	0.06227834		3520.37	0.04109866		4050.37	0.1350261
340.6	0.02853981		870.59	0.02935239		1400.59	0.08962965		1930.59	0.09789198		2460.58	0.03321608		2990.58	0.06313342		3520.57	0.04203076		4050.57	0.1352641
340.8	0.02863487		870.79	0.02921987		1400.79	0.0890455		1930.79	0.09684593		2460.78	0.03346391		2990.78	0.06301704		3520.77	0.04180869		4050.77	0.13469457
341	0.02868735		870.99	0.02978854		1400.99	0.08858826		1930.99	0.09599177		2460.98	0.03275224		2990.98	0.06315113		3520.97	0.04115291		4050.97	0.13515248
341.2	0.02836001		871.19	0.03031691		1401.19	0.088642		1931.19	0.09648766		2461.18	0.03279354		2991.18	0.06335034		3521.17	0.03996843		4051.17	0.13462285
341.4	0.02770709		871.39	0.03091001		1401.39	0.08893757		1931.39	0.09717107		2461.38	0.03286204		2991.38	0.06418228		3521.37	0.03957554		4051.37	0.13431302
341.6	0.02620624		871.59	0.03104727		1401.59	0.08898717		1931.59	0.09810823		2461.58	0.03303844		2991.58	0.06431833		3521.57	0.03817257		4051.57	0.13372619
341.8	0.0255618		871.79	0.03154049		1401.79	0.08846881		1931.79	0.0984461		2461.78	0.03273817		2991.78	0.06448375		3521.77	0.03814259		4051.77	0.13377388
342	0.02550933		871.99	0.03181928		1401.99	0.08832849		1931.99	0.1002094		2461.98	0.03302847		2991.98	0.0651154		3521.97	0.037798		4051.97	0.13351448
342.2	0.02497493		872.19	0.03097718		1402.19	0.08760681		1932.19	0.10128704		2462.18	0.03194575		2992.18	0.06569962		3522.17	0.03868833		4052.17	0.1338086
342.4	0.02402941		872.39	0.03097162		1402.39	0.08825267		1932.39	0.10187284		2462.38	0.03132427		2992.38	0.06503301		3522.37	0.03956155		4052.37	0.13430228
342.6	0.02406512		872.59	0.03172169		1402.59	0.0879667		1932.59	0.10285928		2462.58	0.03067809		2992.58	0.06405649		3522.57	0.03964378		4052.57	0.13424755
342.8	0.02409758		872.79	0.0304226		1402.79	0.0882105		1932.79	0.10285501		2462.78	0.03099432		2992.78	0.06377686		3522.77	0.04028774		4052.77	0.13335953
343	0.02329585		872.99	0.02990127		1402.99	0.08812662		1932.99	0.10303701		2462.98	0.03130065		2992.98	0.06430752		3522.97	0.04055517		4052.97	0.13324901
343.2	0.02334912		873.19	0.0286428		1403.19	0.08850107		1933.19	0.10364855		2463.18	0.03266254		2993.18	0.06339077		3523.17	0.04030732		4053.17	0.13277297
343.4	0.02377662		873.39	0.02633215		1403.39	0.08820509		1933.39	0.10499982		2463.38	0.0333634		2993.38	0.06288996		3523.37	0.0403136		4053.37	0.13270306
343.6	0.02397935		873.59	0.02519323		1403.59	0.08760013		1933.59	0.10532139		2463.58	0.03325741		2993.58	0.06307437		3523.57	0.04060949		4053.57	0.13311803
343.8	0.02420834		873.79	0.02410421		1403.79	0.08810138		1933.79	0.10518761		2463.78	0.03311567		2993.78	0.06298613		3523.77	0.04048146		4053.77	0.13356154
344	0.02374374		873.99	0.0236017		1403.99	0.08809766		1933.99	0.10496694		2463.98	0.03327667		2993.98	0.06399865		3523.97	0.03947792		4053.97	0.13478418
344.2	0.0248227		874.19	0.02366014		1404.19	0.08843695		1934.19	0.10466216		2464.18	0.03378587		2994.18	0.06394373		3524.17	0.03951813		4054.17	0.13498992
344.4	0.02502688		874.39	0.02220514		1404.39	0.08918224		1934.39	0.1049199		2464.38	0.03408592		2994.38	0.06412311		3524.37	0.0398122		4054.37	0.13501137
344.6	0.02523444		874.59	0.02169454		1404.59	0.0894142		1934.59	0.10397704		2464.58	0.03399468		2994.58	0.06495916		3524.57	0.04072338		4054.57	0.13526748
344.8	0.02504063		874.79	0.02081312		1404.79	0.08938862		1934.79	0.10319183		2464.78	0.03431068		2994.78	0.06518684		3524.77	0.04024937		4054.77	0.13578788
345	0.02503061		874.99	0.02199963		1404.99	0.09018415		1934.99	0.10330444		2464.98	0.0346098		2994.98	0.06598932		3524.97	0.03970304		4054.97	0.13617023
345.2	0.02364102		875.19	0.02166706		1405.19	0.09090503		1935.19	0.10314656		2465.18	0.03461949		2995.18	0.06694022		3525.17	0.03999787		4055.17	0.13563822
345.4	0.02312428		875.39	0.02209847		1405.39	0.09129142		1935.39	0.10303935		2465.38	0.03531224		2995.38	0.06713842		3525.37	0.04061696		4055.37	0.13594814
345.6	0.02300629		875.59	0.02265204		1405.59	0.09157058		1935.59	0.10254092		2465.58	0.03446061		2995.58	0.06765667		3525.57	0.04060491		4055.57	0.13631476
345.8	0.02300391		875.79	0.02379137		1405.79	0.09236635		1935.79	0.10217662		2465.78	0.03429434		2995.78	0.06726473		3525.77	0.04077067		4055.77	0.13756094
346	0.02341251		875.99	0.024712		1405.99	0.09252185		1935.99	0.10285817		2465.98	0.03409996		2995.98	0.0668318		3525.97	0.04162507		4055.97	0.13776329
346.2	0.02330905		876.19	0.02444479		1406.19	0.09293552		1936.19	0.1022417		2466.18	0.03331021		2996.18	0.0660807		3526.17	0.04196674		4056.17	0.13828111
346.4	0.02424914		876.39	0.02599413		1406.39	0.09379182		1936.39	0.1016346		2466.38	0.03312044		2996.38	0.06481825		3526.37	0.04190074		4056.37	0.13860436
346.6	0.02441922		876.59	0.02659492		1406.59	0.09299417		1936.59	0.10295089		2466.58	0.03327607		2996.58	0.06413501		3526.57	0.04175326		4056.57	0.1379444
346.8	0.0253509		876.79	0.02657537		1406.79	0.09258533		1936.79	0.10331621		2466.78	0.03429333		2996.78	0.06540954		3526.77	0.04142158		4056.77	0.13746655
347	0.02493798		876.99	0.02698041		1406.99	0.09245193		1936.99	0.10410373		2466.98	0.03448859		2996.98	0.0650522		3526.97	0.04099172		4056.97	0.13735077
347.2	0.02615896		877.19	0.02703059		1407.19	0.09270979		1937.19	0.1050896		2467.18	0.03484904		2997.18	0.06414914		3527.17	0.03967413		4057.17	0.13743146
347.4	0.02671158		877.39	0.02712948		1407.39	0.09242445		1937.39	0.10562621		2467.38	0.03429834		2997.38	0.06414841		3527.37	0.03951001		4057.37	0.13790521
347.6	0.02767457		877.59	0.02759007		1407.59	0.0930617		1937.59	0.10530793		2467.58	0.03458516		2997.58	0.06473785		3527.57	0.03949497		4057.57	0.13880129
347.8	0.02723186		877.79	0.02786681		1407.79	0.09400475		1937.79	0.10648627		2467.78	0.03473408		2997.78	0.06449584		3527.77	0.03927883		4057.77	0.13879334
348	0.02735543		877.99	0.02736039		1407.99	0.09376887		1937.99	0.10649953		2467.98	0.03521067		2997.98	0.06480597		3527.97	0.03866069		4057.97	0.13870176
348.2	0.02802421		878.19	0.02713742		1408.19	0.09410853		1938.19	0.10666465		2468.18	0.03551016		2998.18	0.06521377		3528.17	0.03830832		4058.17	0.13798318
348.4	0.02810482		878.39	0.0253389		1408.39	0.09512246		1938.39	0.10664726		2468.38	0.03519595		2998.38	0.06602726		3528.37	0.03805114		4058.37	0.1377916
348.6	0.02813142		878.59	0.02538966		1408.59	0.09610052		1938.59	0.10662046		2468.58	0.03582394		2998.58	0.06665794		3528.57	0.03852165		4058.57	0.13797003
348.8	0.02758588		878.79	0.02560561		1408.79	0.09588942		1938.79	0.10620238		2468.78	0.03520511		2998.78	0.0670175		3528.77	0.03852326		4058.77	0.13834164
349	0.0274003		878.99	0.02725457		1408.99	0.09526212		1938.99	0.10588356		2468.98	0.03509396		2998.98	0.06736383		3528.97	0.03826676		4058.97	0.13815325
349.2	0.02662782		879.19	0.02657865		1409.19	0.09494895		1939.19	0.10520589		2469.18	0.03415156		2999.18	0.06671048		3529.17	0.03867949		4059.17	0.13746052
349.4	0.0257127		879.39	0.02643072		1409.39	0.09518367		1939.39	0.10501596		2469.38	0.03462359		2999.38	0.0661998		3529.37	0.0391342		4059.37	0.13750151
349.6	0.02550001		879.59	0.02684568		1409.59	0.09542504		1939.59	0.10434027		2469.58	0.03398801		2999.58	0.06545336		3529.57	0.03914848		4059.57	0.13750967
349.8	0.02573494		879.79	0.02723864		1409.79	0.09514398		1939.79	0.10425352		2469.78	0.03453426		2999.78	0.06509006		3529.77	0.039952		4059.77	0.13779989
350	0.02596475		879.99	0.02689416		1409.99	0.09383093		1939.99	0.10403052		2469.98	0.03425103		2999.98	0.06478764		3529.97	0.04031436		4059.97	0.13795151
350.2	0.02579857		880.19	0.02636032		1410.19	0.09426496		1940.19	0.10346771		2470.18	0.03392835		3000.18	0.06591572		3530.17	0.03977506		4060.17	0.13854559
350.4	0.02628599		880.39	0.02647602		1410.39	0.0936361		1940.39	0.10373864		2470.38	0.03440449		3000.38	0.06612002		3530.37	0.04038796		4060.37	0.13853887
350.6	0.02593412		880.59	0.02653117		1410.59	0.09280592		1940.59	0.1052777		2470.58	0.03385228		3000.58	0.06645217		3530.57	0.04149446		4060.57	0.13905646
350.8	0.02611844		880.79	0.02624654		1410.79	0.09334509		1940.79	0.10649223		2470.78	0.03459678		3000.78	0.06675733		3530.77	0.04133171		4060.77	0.13925636
351	0.02540101		880.99	0.0256941		1410.99	0.09334563		1940.99	0.10581612		2470.98	0.03449564		3000.98	0.0666648		3530.97	0.04156513		4060.97	0.13930159
351.2	0.02620161		881.19	0.02594519		1411.19	0.09330372		1941.19	0.10621072		2471.18	0.03492847		3001.18	0.0665736		3531.17	0.04123849		4061.17	0.14022706
351.4	0.02649406		881.39	0.02629435		1411.39	0.09375444		1941.39	0.10685909		2471.38	0.03576784		3001.38	0.06704535		3531.37	0.04165358		4061.37	0.14082483
351.6	0.0267581		881.59	0.02673101		1411.59	0.09424835		1941.59	0.10738511		2471.58	0.03645395		3001.58	0.06669414		3531.57	0.04211794		4061.57	0.14162375
351.8	0.02625355		881.79	0.02676196		1411.79	0.09375871		1941.79	0.10761503		2471.78	0.03632509		3001.78	0.06701057		3531.77	0.04240531		4061.77	0.14152638
352	0.02590601		881.99	0.02745261		1411.99	0.0936402		1941.99	0.10708094		2471.98	0.03642851		3001.98	0.0670922		3531.97	0.04234703		4061.97	0.14143119
352.2	0.02608079		882.19	0.02779681		1412.19	0.0938356		1942.19	0.1070601		2472.18	0.03716398		3002.18	0.06760159		3532.17	0.04196698		4062.17	0.14120645
352.4	0.02580497		882.39	0.02762503		1412.39	0.09366456		1942.39	0.10636724		2472.38	0.03709383		3002.38	0.06763536		3532.37	0.04250933		4062.37	0.14161532
352.6	0.02619863		882.59	0.02876553		1412.59	0.09423825		1942.59	0.10567786		2472.58	0.03699392		3002.58	0.06725511		3532.57	0.0423282		4062.57	0.14228553
352.8	0.0267034		882.79	0.02857801		1412.79	0.09392221		1942.79	0.10501978		2472.78	0.0364929		3002.78	0.06632564		3532.77	0.041549		4062.77	0.14194693
353	0.02630434		882.99	0.02876514		1412.99	0.09386798		1942.99	0.10478349		2472.98	0.03686792		3002.98	0.06607538		3532.97	0.04139253		4062.97	0.14095502
353.2	0.02560646		883.19	0.02759358		1413.19	0.09464		1943.19	0.10427384		2473.18	0.03678543		3003.18	0.06562739		3533.17	0.04150471		4063.17	0.14002794
353.4	0.0240959		883.39	0.02745482		1413.39	0.09477959		1943.39	0.10423518		2473.38	0.03717518		3003.38	0.06601755		3533.37	0.04171805		4063.37	0.13962882
353.6	0.0242335		883.59	0.02766496		1413.59	0.0947629		1943.59	0.10417922		2473.58	0.03727197		3003.58	0.0659786		3533.57	0.04236231		4063.57	0.13866415
353.8	0.02414765		883.79	0.02678917		1413.79	0.09386758		1943.79	0.10484718		2473.78	0.03738829		3003.78	0.06650368		3533.77	0.04260151		4063.77	0.13868178
354	0.02338844		883.99	0.02601869		1413.99	0.09337319		1943.99	0.10526904		2473.98	0.03756958		3003.98	0.06666768		3533.97	0.04214545		4063.97	0.13877042
354.2	0.02374807		884.19	0.02481458		1414.19	0.09362319		1944.19	0.10526584		2474.18	0.03699013		3004.18	0.06703552		3534.17	0.04216275		4064.17	0.13983797
354.4	0.0234105		884.39	0.02481703		1414.39	0.09318575		1944.39	0.10674142		2474.38	0.03707136		3004.38	0.06648952		3534.37	0.04256167		4064.37	0.14010623
354.6	0.02401197		884.59	0.02399967		1414.59	0.09316108		1944.59	0.10762171		2474.58	0.03650122		3004.58	0.06709687		3534.57	0.04322925		4064.57	0.14061022
354.8	0.02416803		884.79	0.0236702		1414.79	0.09262931		1944.79	0.10807448		2474.78	0.03741334		3004.78	0.06734081		3534.77	0.0428193		4064.77	0.1405992
355	0.02488656		884.99	0.02399811		1414.99	0.09209605		1944.99	0.10754521		2474.98	0.0370593		3004.98	0.06731925		3534.97	0.04291912		4064.97	0.14098376
355.2	0.02523207		885.19	0.02353734		1415.19	0.09226751		1945.19	0.10735655		2475.18	0.03680425		3005.18	0.06739478		3535.17	0.04294275		4065.17	0.14144431
355.4	0.02563865		885.39	0.02327066		1415.39	0.09246479		1945.39	0.10805909		2475.38	0.03614431		3005.38	0.06854236		3535.37	0.04340311		4065.37	0.14083222
355.6	0.02536477		885.59	0.0237805		1415.59	0.09228768		1945.59	0.10807436		2475.58	0.03532771		3005.58	0.06807938		3535.57	0.0437756		4065.57	0.14115641
355.8	0.02618781		885.79	0.02441524		1415.79	0.092303		1945.79	0.10815035		2475.78	0.03500095		3005.78	0.06838327		3535.77	0.04335498		4065.77	0.14119122
356	0.02684487		885.99	0.02469119		1415.99	0.09257565		1945.99	0.10874151		2475.98	0.03470936		3005.98	0.06851186		3535.97	0.04370001		4065.97	0.14123729
356.2	0.0279428		886.19	0.02438924		1416.19	0.09355799		1946.19	0.1083963		2476.18	0.03531972		3006.18	0.06898591		3536.17	0.04413439		4066.17	0.14166387
356.4	0.02828767		886.39	0.02374355		1416.39	0.09466888		1946.39	0.10784222		2476.38	0.03482845		3006.38	0.06854688		3536.37	0.04451359		4066.37	0.14300964
356.6	0.02894572		886.59	0.024318		1416.59	0.09643064		1946.59	0.10766587		2476.58	0.03456245		3006.58	0.06854315		3536.57	0.04428948		4066.57	0.14249938
356.8	0.02872323		886.79	0.02362912		1416.79	0.09733246		1946.79	0.10760412		2476.78	0.03513761		3006.78	0.06901812		3536.77	0.0440419		4066.77	0.14253397
357	0.02764758		886.99	0.02376315		1416.99	0.09803867		1946.99	0.10752441		2476.98	0.03556519		3006.98	0.06989562		3536.97	0.04419751		4066.97	0.14180118
357.2	0.02686457		887.19	0.02369313		1417.19	0.09821933		1947.19	0.10782103		2477.18	0.03636146		3007.18	0.07012067		3537.17	0.04431261		4067.17	0.14163411
357.4	0.02606076		887.39	0.02401014		1417.39	0.09829079		1947.39	0.10802083		2477.38	0.03722822		3007.38	0.07042345		3537.37	0.0448021		4067.37	0.14185469
357.6	0.02616279		887.59	0.02436889		1417.59	0.09808773		1947.59	0.10836892		2477.58	0.0384749		3007.58	0.07072151		3537.57	0.04490476		4067.57	0.14183259
357.8	0.02616457		887.79	0.02423028		1417.79	0.09718907		1947.79	0.10921288		2477.78	0.03845287		3007.78	0.07000056		3537.77	0.04422683		4067.77	0.14253165
358	0.02659593		887.99	0.02492975		1417.99	0.09619763		1947.99	0.10952747		2477.98	0.03941306		3007.98	0.07004597		3537.97	0.04371206		4067.97	0.14220232
358.2	0.02710478		888.19	0.02527175		1418.19	0.09562687		1948.19	0.10968391		2478.18	0.03918457		3008.18	0.06966775		3538.17	0.04347908		4068.17	0.14304003
358.4	0.02771816		888.39	0.02616743		1418.39	0.0944971		1948.39	0.11040041		2478.38	0.03978359		3008.38	0.07009592		3538.37	0.04276584		4068.37	0.14307678
358.6	0.02812524		888.59	0.02613198		1418.59	0.09327182		1948.59	0.10972537		2478.58	0.0400573		3008.58	0.07009543		3538.57	0.04241875		4068.57	0.14258135
358.8	0.02790675		888.79	0.02611187		1418.79	0.09259932		1948.79	0.10937102		2478.78	0.04001867		3008.78	0.06938067		3538.77	0.04165492		4068.77	0.14248792
359	0.02926684		888.99	0.02551191		1418.99	0.09298844		1948.99	0.10917604		2478.98	0.03998065		3008.98	0.06873581		3538.97	0.04100776		4068.97	0.14195403
359.2	0.03012976		889.19	0.02476751		1419.19	0.09280375		1949.19	0.10893628		2479.18	0.04003115		3009.18	0.06877213		3539.17	0.04127917		4069.17	0.14120305
359.4	0.03124809		889.39	0.02498564		1419.39	0.09248792		1949.39	0.10972457		2479.38	0.04034127		3009.38	0.06916376		3539.37	0.04259777		4069.37	0.1410232
359.6	0.03137368		889.59	0.02529447		1419.59	0.09196298		1949.59	0.10931577		2479.58	0.04108895		3009.58	0.06844531		3539.57	0.04235593		4069.57	0.1419565
359.8	0.03247363		889.79	0.0255139		1419.79	0.09293982		1949.79	0.11027497		2479.78	0.04078381		3009.78	0.06850646		3539.77	0.04184027		4069.77	0.14182703
360	0.03284925		889.99	0.02543313		1419.99	0.09344303		1949.99	0.11046347		2479.98	0.04048681		3009.98	0.06816214		3539.97	0.04255012		4069.97	0.14202318
360.2	0.03251765		890.19	0.02605248		1420.19	0.09426542		1950.19	0.10987799		2480.18	0.04058171		3010.18	0.06773902		3540.17	0.04316428		4070.17	0.14260396
360.4	0.03251616		890.39	0.02589471		1420.39	0.09472168		1950.39	0.10893365		2480.38	0.03995762		3010.38	0.06756114		3540.37	0.0436678		4070.37	0.14272537
360.6	0.03221931		890.59	0.02582702		1420.59	0.09540661		1950.59	0.10920787		2480.58	0.0399649		3010.58	0.06828559		3540.57	0.04352264		4070.57	0.14329381
360.8	0.03201606		890.79	0.02492727		1420.79	0.0964942		1950.79	0.10935583		2480.78	0.04069069		3010.78	0.06908201		3540.77	0.04310467		4070.77	0.14400034
361	0.03184279		890.99	0.02466345		1420.99	0.09672537		1950.99	0.10931136		2480.98	0.04011312		3010.98	0.06946682		3540.97	0.04376063		4070.97	0.14442227
361.2	0.03124359		891.19	0.02399159		1421.19	0.09695417		1951.19	0.10919779		2481.18	0.0401921		3011.18	0.07007834		3541.17	0.04439018		4071.17	0.14547577
361.4	0.03109829		891.39	0.02451053		1421.39	0.09703631		1951.39	0.10876039		2481.38	0.03984338		3011.38	0.07061363		3541.37	0.04502467		4071.37	0.14633928
361.6	0.03162616		891.59	0.02489541		1421.59	0.09630113		1951.59	0.10959725		2481.58	0.04005057		3011.58	0.07077454		3541.57	0.04496555		4071.57	0.14632408
361.8	0.0315764		891.79	0.0255891		1421.79	0.09618405		1951.79	0.10967282		2481.78	0.0397949		3011.78	0.07118743		3541.77	0.04454348		4071.77	0.14642291
362	0.03164919		891.99	0.02629384		1421.99	0.09593225		1951.99	0.10912992		2481.98	0.03958827		3011.98	0.07095999		3541.97	0.04436641		4071.97	0.14661275
362.2	0.03183562		892.19	0.02737922		1422.19	0.09653354		1952.19	0.10928007		2482.18	0.03883433		3012.18	0.07070139		3542.17	0.04386033		4072.17	0.14791338
362.4	0.03178847		892.39	0.02696969		1422.39	0.09618552		1952.39	0.10918788		2482.38	0.03812952		3012.38	0.07126032		3542.37	0.04333177		4072.37	0.14793762
362.6	0.03143079		892.59	0.02576727		1422.59	0.09648908		1952.59	0.10872218		2482.58	0.03771457		3012.58	0.06995716		3542.57	0.04402646		4072.57	0.14742485
362.8	0.03218329		892.79	0.02559427		1422.79	0.09735756		1952.79	0.10831817		2482.78	0.03806347		3012.78	0.06962538		3542.77	0.04469953		4072.77	0.14820141
363	0.03326677		892.99	0.02473965		1422.99	0.09741294		1952.99	0.10824324		2482.98	0.03872092		3012.98	0.06961957		3542.97	0.04495203		4072.97	0.14737327
363.2	0.03304588		893.19	0.02396678		1423.19	0.09669046		1953.19	0.10792108		2483.18	0.03884819		3013.18	0.06854054		3543.17	0.04569881		4073.17	0.14784278
363.4	0.03332525		893.39	0.02372285		1423.39	0.09596036		1953.39	0.10713168		2483.38	0.03890415		3013.38	0.06920921		3543.37	0.04628254		4073.37	0.14855058
363.6	0.03260287		893.59	0.02335265		1423.59	0.09592854		1953.59	0.1069991		2483.58	0.03862925		3013.58	0.06901222		3543.57	0.04546546		4073.57	0.14859082
363.8	0.03243536		893.79	0.0234347		1423.79	0.09666557		1953.79	0.10873294		2483.78	0.03787899		3013.78	0.0686448		3543.77	0.0458006		4073.77	0.14860862
364	0.03270977		893.99	0.02351423		1423.99	0.09632137		1953.99	0.10872998		2483.98	0.0387314		3013.98	0.06785636		3543.97	0.04627988		4073.97	0.14874087
364.2	0.03265633		894.19	0.0232981		1424.19	0.09614936		1954.19	0.1090109		2484.18	0.03956985		3014.18	0.06843449		3544.17	0.04643332		4074.17	0.14880427
364.4	0.03240727		894.39	0.02245007		1424.39	0.09672142		1954.39	0.10940992		2484.38	0.03997859		3014.38	0.06861937		3544.37	0.04619981		4074.37	0.14828929
364.6	0.03239528		894.59	0.02222855		1424.59	0.09686132		1954.59	0.11023074		2484.58	0.04109027		3014.58	0.06913056		3544.57	0.04556913		4074.57	0.14910506
364.8	0.03224197		894.79	0.02234427		1424.79	0.09737928		1954.79	0.1106211		2484.78	0.04224385		3014.78	0.06991381		3544.77	0.04504188		4074.77	0.14923404
365	0.03289401		894.99	0.02250197		1424.99	0.0970714		1954.99	0.11071861		2484.98	0.04191214		3014.98	0.07109815		3544.97	0.04547154		4074.97	0.14983478
365.2	0.03269841		895.19	0.02258034		1425.19	0.09729938		1955.19	0.11111061		2485.18	0.04222327		3015.18	0.07242394		3545.17	0.04505748		4075.17	0.14946238
365.4	0.03306763		895.39	0.02421092		1425.39	0.09699041		1955.39	0.11204395		2485.38	0.04260636		3015.38	0.0729096		3545.37	0.04528403		4075.37	0.14997827
365.6	0.03344687		895.59	0.02477224		1425.59	0.09692343		1955.59	0.11218438		2485.58	0.04318979		3015.58	0.07312171		3545.57	0.04433621		4075.57	0.1502206
365.8	0.03315876		895.79	0.02636006		1425.79	0.09672156		1955.79	0.11247582		2485.78	0.04253641		3015.78	0.0740678		3545.77	0.04405826		4075.77	0.14985706
366	0.03282188		895.99	0.02693412		1425.99	0.09688003		1955.99	0.11316045		2485.98	0.04217856		3015.98	0.07396983		3545.97	0.04405777		4075.97	0.15015093
366.2	0.03268068		896.19	0.02825391		1426.19	0.09754909		1956.19	0.11417307		2486.18	0.04266671		3016.18	0.07479216		3546.17	0.04423144		4076.17	0.15048489
366.4	0.03268586		896.39	0.02753971		1426.39	0.09784905		1956.39	0.11452097		2486.38	0.0424375		3016.38	0.07467093		3546.37	0.04480643		4076.37	0.14964248
366.6	0.03328894		896.59	0.02774171		1426.59	0.09895582		1956.59	0.11377225		2486.58	0.04271485		3016.58	0.07331055		3546.57	0.04563191		4076.57	0.15000597
366.8	0.03277555		896.79	0.02864622		1426.79	0.09849837		1956.79	0.11368621		2486.78	0.04219745		3016.78	0.0731945		3546.77	0.04539121		4076.77	0.15045655
367	0.03294481		896.99	0.02698538		1426.99	0.09829948		1956.99	0.11402292		2486.98	0.0412515		3016.98	0.07245728		3546.97	0.04498582		4076.97	0.14980822
367.2	0.03305246		897.19	0.02698533		1427.19	0.09787419		1957.19	0.11358823		2487.18	0.04058616		3017.18	0.07119393		3547.17	0.04529523		4077.17	0.15029162
367.4	0.03380976		897.39	0.02689183		1427.39	0.0976644		1957.39	0.11324431		2487.38	0.04012371		3017.38	0.07166375		3547.37	0.04542737		4077.37	0.15059829
367.6	0.03265705		897.59	0.02622005		1427.59	0.09804848		1957.59	0.11354776		2487.58	0.03998898		3017.58	0.07081467		3547.57	0.04582199		4077.57	0.15039052
367.8	0.03249814		897.79	0.02640905		1427.79	0.09806272		1957.79	0.11402894		2487.78	0.04090727		3017.78	0.06979179		3547.77	0.04632559		4077.77	0.15031042
368	0.03355012		897.99	0.02649874		1427.99	0.09835403		1957.99	0.11473117		2487.98	0.04178761		3017.98	0.0694417		3547.97	0.04590554		4077.97	0.14895285
368.2	0.03328877		898.19	0.02555502		1428.19	0.09906489		1958.19	0.11471625		2488.18	0.04162807		3018.18	0.06917946		3548.17	0.046482		4078.17	0.14811521
368.4	0.03268524		898.39	0.02624244		1428.39	0.09980429		1958.39	0.1146265		2488.38	0.04211514		3018.38	0.06895868		3548.37	0.04620108		4078.37	0.14779546
368.6	0.0333134		898.59	0.02631564		1428.59	0.0996848		1958.59	0.11417189		2488.58	0.04225144		3018.58	0.06840382		3548.57	0.04654481		4078.57	0.14823844
368.8	0.0333215		898.79	0.02655728		1428.79	0.10043859		1958.79	0.11379657		2488.78	0.04234931		3018.78	0.06822207		3548.77	0.04604276		4078.77	0.14844601
369	0.03367909		898.99	0.02600094		1428.99	0.10025671		1958.99	0.1136445		2488.98	0.0410568		3018.98	0.0688117		3548.97	0.04701762		4078.97	0.1489932
369.2	0.03308724		899.19	0.02620856		1429.19	0.10013971		1959.19	0.11331459		2489.18	0.04122547		3019.18	0.06891152		3549.17	0.04657792		4079.17	0.14921413
369.4	0.03299262		899.39	0.02678454		1429.39	0.09982506		1959.39	0.11313035		2489.38	0.04044404		3019.38	0.06872526		3549.37	0.04630138		4079.37	0.1503732
369.6	0.03362782		899.59	0.02684123		1429.59	0.10002434		1959.59	0.11235035		2489.58	0.04036844		3019.58	0.06931627		3549.57	0.04621435		4079.57	0.150733
369.8	0.0340875		899.79	0.02669707		1429.79	0.09969393		1959.79	0.11289766		2489.78	0.03997032		3019.78	0.0699405		3549.77	0.04683429		4079.77	0.15017475
370	0.03389786		899.99	0.02589032		1429.99	0.10021519		1959.99	0.11258209		2489.98	0.0401285		3019.98	0.06984842		3549.97	0.04641365		4079.97	0.1507182
370.2	0.03396155		900.19	0.02625719		1430.19	0.10048005		1960.19	0.11125651		2490.18	0.04040071		3020.18	0.06883031		3550.17	0.04619058		4080.17	0.15124873
370.4	0.03490605		900.39	0.02522669		1430.39	0.10094188		1960.39	0.11076701		2490.38	0.03987915		3020.38	0.06774474		3550.37	0.04580868		4080.37	0.15107004
370.6	0.0346224		900.59	0.02509453		1430.59	0.10127156		1960.59	0.11062309		2490.58	0.03901009		3020.58	0.0670368		3550.57	0.04560121		4080.57	0.15175279
370.8	0.03433285		900.79	0.02484216		1430.79	0.10085703		1960.79	0.11127579		2490.78	0.03847554		3020.78	0.06721277		3550.77	0.04512425		4080.77	0.1521512
371	0.03512659		900.99	0.0239693		1430.99	0.10142684		1960.99	0.11083934		2490.98	0.03864652		3020.98	0.0679972		3550.97	0.04543429		4080.97	0.15229366
371.2	0.03528651		901.19	0.02391842		1431.19	0.101155		1961.19	0.11055287		2491.18	0.03893707		3021.18	0.06875949		3551.17	0.04642364		4081.17	0.15274151
371.4	0.03548982		901.39	0.02337113		1431.39	0.10139292		1961.39	0.11020539		2491.38	0.03953293		3021.38	0.06907145		3551.37	0.04647414		4081.37	0.15400649
371.6	0.03522092		901.59	0.02308795		1431.59	0.10166189		1961.59	0.11068849		2491.58	0.04029139		3021.58	0.06908981		3551.57	0.04764287		4081.57	0.1539363
371.8	0.03580571		901.79	0.02351785		1431.79	0.10208182		1961.79	0.11165686		2491.78	0.04129741		3021.78	0.06973289		3551.77	0.04831523		4081.77	0.1537615
372	0.03625476		901.99	0.02333141		1431.99	0.10215691		1961.99	0.11340774		2491.98	0.04098826		3021.98	0.07007077		3551.97	0.04956411		4081.97	0.15362038
372.2	0.03498458		902.19	0.02318992		1432.19	0.1018785		1962.19	0.11326975		2492.18	0.04076494		3022.18	0.06992714		3552.17	0.04972921		4082.17	0.15359991
372.4	0.03431762		902.39	0.02433417		1432.39	0.10225162		1962.39	0.11382738		2492.38	0.04103037		3022.38	0.0713613		3552.37	0.04920572		4082.37	0.15338075
372.6	0.03436142		902.59	0.02378757		1432.59	0.10168422		1962.59	0.11450139		2492.58	0.04134328		3022.58	0.07074251		3552.57	0.04982303		4082.57	0.15379716
372.8	0.03331132		902.79	0.02366063		1432.79	0.10233492		1962.79	0.115178		2492.78	0.04218029		3022.78	0.07141453		3552.77	0.04943305		4082.77	0.15474483
373	0.03303902		902.99	0.02381566		1432.99	0.10134318		1962.99	0.11557212		2492.98	0.04200302		3022.98	0.07239839		3552.97	0.0499239		4082.97	0.15491836
373.2	0.03272212		903.19	0.02431651		1433.19	0.10151197		1963.19	0.1158089		2493.18	0.04261873		3023.18	0.07253325		3553.17	0.04868787		4083.17	0.15496442
373.4	0.03317356		903.39	0.02458283		1433.39	0.10204729		1963.39	0.11594118		2493.38	0.0425691		3023.38	0.07248399		3553.37	0.04805631		4083.37	0.15508098
373.6	0.03417192		903.59	0.02446182		1433.59	0.10258591		1963.59	0.11653439		2493.58	0.04335161		3023.58	0.0728818		3553.57	0.0475841		4083.57	0.15481371
373.8	0.0337819		903.79	0.02452982		1433.79	0.10269065		1963.79	0.11680063		2493.78	0.04358439		3023.78	0.0724875		3553.77	0.04724856		4083.77	0.15458349
374	0.03350775		903.99	0.02414636		1433.99	0.10290417		1963.99	0.11531364		2493.98	0.04341312		3023.98	0.07215595		3553.97	0.04667227		4083.97	0.15458169
374.2	0.03383239		904.19	0.0238526		1434.19	0.10238288		1964.19	0.11403449		2494.18	0.04321664		3024.18	0.07127592		3554.17	0.04601084		4084.17	0.15523085
374.4	0.03335946		904.39	0.02316443		1434.39	0.10275209		1964.39	0.11447056		2494.38	0.04289312		3024.38	0.07090925		3554.37	0.04551621		4084.37	0.15495966
374.6	0.03259062		904.59	0.02397582		1434.59	0.1027501		1964.59	0.11375386		2494.58	0.04209434		3024.58	0.0711333		3554.57	0.04499552		4084.57	0.15449254
374.8	0.032533		904.79	0.02363291		1434.79	0.10306386		1964.79	0.11367505		2494.78	0.04279862		3024.78	0.07221108		3554.77	0.04442103		4084.77	0.15470314
375	0.0325459		904.99	0.02329234		1434.99	0.10276421		1964.99	0.11280748		2494.98	0.04239445		3024.98	0.07273951		3554.97	0.04509916		4084.97	0.15458193
375.2	0.03197822		905.19	0.02347025		1435.19	0.10345523		1965.19	0.11280446		2495.18	0.0414808		3025.18	0.07250369		3555.17	0.04543725		4085.17	0.15448123
375.4	0.03218031		905.39	0.02387751		1435.39	0.10349622		1965.39	0.11242844		2495.38	0.04128916		3025.38	0.07184566		3555.37	0.04532325		4085.37	0.15532985
375.6	0.03191392		905.59	0.02431382		1435.59	0.10358097		1965.59	0.1138		2495.58	0.04056549		3025.58	0.0717177		3555.57	0.04563364		4085.57	0.15489044
375.8	0.03191464		905.79	0.0243507		1435.79	0.10410933		1965.79	0.11402636		2495.78	0.04074825		3025.78	0.07248162		3555.77	0.04532091		4085.77	0.15442127
376	0.03176655		905.99	0.02437911		1435.99	0.10317483		1965.99	0.11444078		2495.98	0.04055735		3025.98	0.07191798		3555.97	0.04463585		4085.97	0.15432023
376.2	0.0314722		906.19	0.02430018		1436.19	0.10202848		1966.19	0.11525472		2496.18	0.04045465		3026.18	0.07256434		3556.17	0.0438721		4086.17	0.15411874
376.4	0.03185253		906.39	0.02456818		1436.39	0.10256088		1966.39	0.11622369		2496.38	0.04093257		3026.38	0.07309015		3556.37	0.04433452		4086.37	0.15388387
376.6	0.03191254		906.59	0.02444101		1436.59	0.1012812		1966.59	0.11707734		2496.58	0.04174368		3026.58	0.0724821		3556.57	0.04470468		4086.57	0.15508753
376.8	0.03160425		906.79	0.02475693		1436.79	0.10120095		1966.79	0.11696782		2496.78	0.04190808		3026.78	0.07308077		3556.77	0.04405034		4086.77	0.15567337
377	0.03237965		906.99	0.02503914		1436.99	0.100376		1966.99	0.11700119		2496.98	0.0416905		3026.98	0.07317522		3556.97	0.04457108		4086.97	0.15603967
377.2	0.03309945		907.19	0.0247642		1437.19	0.10140821		1967.19	0.11788569		2497.18	0.04245463		3027.18	0.0734029		3557.17	0.04466684		4087.17	0.15622398
377.4	0.03411997		907.39	0.02445694		1437.39	0.10208219		1967.39	0.11805549		2497.38	0.04338111		3027.38	0.07377994		3557.37	0.04522833		4087.37	0.15646819
377.6	0.03387947		907.59	0.02514503		1437.59	0.10246874		1967.59	0.11858413		2497.58	0.04388631		3027.58	0.07424567		3557.57	0.04585828		4087.57	0.15654875
377.8	0.03379997		907.79	0.02567153		1437.79	0.10271221		1967.79	0.1179557		2497.78	0.04507573		3027.78	0.07455762		3557.77	0.04709582		4087.77	0.15705394
378	0.03421664		907.99	0.02483568		1437.99	0.10268142		1967.99	0.1169433		2497.98	0.0454774		3027.98	0.074892		3557.97	0.04782591		4087.97	0.15751411
378.2	0.0344803		908.19	0.02477097		1438.19	0.10240315		1968.19	0.11672812		2498.18	0.0458312		3028.18	0.07491803		3558.17	0.04830849		4088.17	0.15838682
378.4	0.03421614		908.39	0.02478885		1438.39	0.10294578		1968.39	0.11679301		2498.38	0.04611505		3028.38	0.07515707		3558.37	0.04912937		4088.37	0.15857639
378.6	0.03494987		908.59	0.02524994		1438.59	0.10309894		1968.59	0.11614224		2498.58	0.04624905		3028.58	0.07602882		3558.57	0.04974658		4088.57	0.15864104
378.8	0.03554455		908.79	0.02483628		1438.79	0.10364576		1968.79	0.11646614		2498.78	0.04650355		3028.78	0.07677438		3558.77	0.05046689		4088.77	0.15947471
379	0.03608766		908.99	0.02532415		1438.99	0.10408063		1968.99	0.11593752		2498.98	0.04546685		3028.98	0.07703015		3558.97	0.05157777		4088.97	0.15996189
379.2	0.03637386		909.19	0.02583459		1439.19	0.10482159		1969.19	0.11606208		2499.18	0.04454464		3029.18	0.07729556		3559.17	0.0519499		4089.17	0.16048458
379.4	0.03744868		909.39	0.02603938		1439.39	0.1047949		1969.39	0.11637592		2499.38	0.04425656		3029.38	0.07766305		3559.37	0.05215446		4089.37	0.16144936
379.6	0.03821006		909.59	0.02616552		1439.59	0.10523845		1969.59	0.11690758		2499.58	0.04378308		3029.58	0.07822492		3559.57	0.05200752		4089.57	0.16160406
379.8	0.03918393		909.79	0.02593681		1439.79	0.10545734		1969.79	0.11667911		2499.78	0.04382562		3029.78	0.07921848		3559.77	0.05194501		4089.77	0.1620431
380	0.03918393		909.99	0.02593681		1439.99	0.10545734		1969.98	0.11667911		2499.98	0.04382562		3029.97	0.07921848		3559.97	0.05194501		4089.97	0.1620431
380.2	0.03929629		910.19	0.02569364		1440.19	0.10582521		1970.18	0.11618177		2500.18	0.04489315		3030.17	0.07927784		3560.17	0.05199192		4090.17	0.16153394
380.4	0.03947206		910.39	0.02562951		1440.39	0.10652396		1970.38	0.11643588		2500.38	0.04599196		3030.37	0.0797346		3560.37	0.05197183		4090.37	0.16105371
380.6	0.03917633		910.59	0.02470513		1440.59	0.10767084		1970.58	0.11662913		2500.58	0.04764123		3030.57	0.07982432		3560.57	0.05186169		4090.57	0.16128382
380.8	0.03947501		910.79	0.02484599		1440.79	0.1085733		1970.78	0.11672444		2500.78	0.0487548		3030.77	0.08052772		3560.77	0.05191867		4090.77	0.16118453
381	0.03921696		910.99	0.02462462		1440.99	0.10949325		1970.98	0.11676933		2500.98	0.04959261		3030.97	0.08082503		3560.97	0.05201938		4090.97	0.16089686
381.2	0.03903514		911.19	0.02448374		1441.19	0.10960624		1971.18	0.11678041		2501.18	0.05049629		3031.17	0.08005872		3561.17	0.05193483		4091.17	0.16042069
381.4	0.03865704		911.39	0.02463128		1441.39	0.10976725		1971.38	0.11768652		2501.38	0.05094317		3031.37	0.08001163		3561.37	0.05181128		4091.37	0.16016813
381.6	0.03867595		911.59	0.02458168		1441.59	0.11055785		1971.58	0.11768015		2501.58	0.05122338		3031.57	0.08023318		3561.57	0.05166732		4091.57	0.16015278
381.8	0.03855398		911.79	0.02356343		1441.79	0.11072277		1971.78	0.11854458		2501.78	0.05077389		3031.77	0.08068504		3561.77	0.0517769		4091.77	0.1607566
382	0.03850418		911.99	0.02303262		1441.99	0.11034032		1971.98	0.11944158		2501.98	0.0508865		3031.97	0.08079083		3561.97	0.05122063		4091.97	0.16068741
382.2	0.03717849		912.19	0.02229638		1442.19	0.11010205		1972.18	0.12011894		2502.18	0.05069798		3032.17	0.08119357		3562.17	0.05016906		4092.17	0.160504
382.4	0.03692373		912.39	0.02099239		1442.39	0.10844684		1972.38	0.11873384		2502.38	0.05060766		3032.37	0.08067918		3562.37	0.04980728		4092.37	0.16044692
382.6	0.03613535		912.59	0.02061964		1442.59	0.10773605		1972.58	0.11888399		2502.58	0.05015173		3032.57	0.07983668		3562.57	0.05005445		4092.57	0.16045647
382.8	0.03623354		912.79	0.02137075		1442.79	0.10763222		1972.78	0.11945382		2502.78	0.05048095		3032.77	0.079406		3562.77	0.04961102		4092.77	0.16130769
383	0.03642651		912.99	0.02124132		1442.99	0.10729067		1972.98	0.11959459		2502.98	0.05059349		3032.97	0.07981333		3562.97	0.04932325		4092.97	0.16185143
383.2	0.03686187		913.19	0.02173728		1443.19	0.10633511		1973.18	0.12002788		2503.18	0.05063349		3033.17	0.08034938		3563.17	0.04969106		4093.17	0.16272597
383.4	0.03793931		913.39	0.02188198		1443.39	0.10590809		1973.38	0.12058744		2503.38	0.05061431		3033.37	0.08083663		3563.37	0.04938274		4093.37	0.16267871
383.6	0.03741283		913.59	0.02152831		1443.59	0.10576136		1973.58	0.12060178		2503.58	0.04942214		3033.57	0.08181797		3563.57	0.04952012		4093.57	0.16297258
383.8	0.03745647		913.79	0.02040008		1443.79	0.10622179		1973.78	0.12023485		2503.78	0.04857032		3033.77	0.08258251		3563.77	0.04969982		4093.77	0.16379344
384	0.03712699		913.99	0.02023475		1443.99	0.10617502		1973.98	0.12121257		2503.98	0.04965263		3033.97	0.08266302		3563.97	0.05098038		4093.97	0.16363598
384.2	0.03726049		914.19	0.01925681		1444.19	0.1067419		1974.18	0.1211738		2504.18	0.04937098		3034.17	0.08265005		3564.17	0.0512935		4094.17	0.16357505
384.4	0.03703483		914.39	0.0191044		1444.39	0.10749797		1974.38	0.12154826		2504.38	0.04959252		3034.37	0.08300998		3564.37	0.05243651		4094.37	0.16433077
384.6	0.03670197		914.59	0.01857551		1444.59	0.10765377		1974.58	0.12166422		2504.58	0.04944673		3034.57	0.08215067		3564.57	0.05323205		4094.57	0.16481924
384.8	0.0369212		914.79	0.01871147		1444.79	0.10748953		1974.78	0.12151872		2504.78	0.04923482		3034.77	0.08196612		3564.77	0.05391114		4094.77	0.16473274
385	0.03698983		914.99	0.0188008		1444.99	0.1074607		1974.98	0.12247502		2504.98	0.04933641		3034.97	0.08079802		3564.97	0.0542484		4094.97	0.1645594
385.2	0.0374105		915.19	0.01926663		1445.19	0.10745377		1975.18	0.12259264		2505.18	0.0495657		3035.17	0.0796597		3565.17	0.05491106		4095.17	0.16443423
385.4	0.03775659		915.39	0.01972852		1445.39	0.10765733		1975.38	0.12384079		2505.38	0.0494169		3035.37	0.07974972		3565.37	0.05621777		4095.37	0.1642956
385.6	0.03786269		915.59	0.01921614		1445.59	0.10827061		1975.58	0.12360545		2505.58	0.04915055		3035.57	0.07980297		3565.57	0.0563337		4095.57	0.16452998
385.8	0.03835484		915.79	0.01817369		1445.79	0.10828078		1975.78	0.12457049		2505.78	0.04890469		3035.77	0.07988985		3565.77	0.05647657		4095.77	0.16426572
386	0.03895087		915.99	0.0181342		1445.99	0.10847336		1975.98	0.12457331		2505.98	0.04908184		3035.97	0.07918223		3565.97	0.05585609		4095.97	0.16328476
386.2	0.03830607		916.19	0.01814387		1446.19	0.10861545		1976.18	0.12482652		2506.18	0.04912934		3036.17	0.07903114		3566.17	0.05555228		4096.17	0.16341071
386.4	0.03867382		916.39	0.01852635		1446.39	0.10820441		1976.38	0.12460415		2506.38	0.04873569		3036.37	0.07844555		3566.37	0.0550218		4096.37	0.16372184
386.6	0.03819747		916.59	0.01974112		1446.59	0.1079191		1976.58	0.12542112		2506.58	0.04842302		3036.57	0.07862784		3566.57	0.05528029		4096.57	0.16335638
386.8	0.03845848		916.79	0.0195503		1446.79	0.10786214		1976.78	0.12546782		2506.78	0.04791342		3036.77	0.07897787		3566.77	0.05470027		4096.77	0.16441522
387	0.03909858		916.99	0.01940672		1446.99	0.10756088		1976.98	0.1253426		2506.98	0.04768666		3036.97	0.079825		3566.97	0.05432463		4096.97	0.16427963
387.2	0.03862715		917.19	0.02013219		1447.19	0.10719263		1977.18	0.12587092		2507.18	0.04792279		3037.17	0.08064209		3567.17	0.05352274		4097.17	0.16336137
387.4	0.038921		917.39	0.02009999		1447.39	0.10685097		1977.38	0.12633611		2507.38	0.04744696		3037.37	0.08170604		3567.37	0.0533706		4097.37	0.16327597
387.6	0.03844802		917.59	0.01956811		1447.59	0.10660841		1977.58	0.12644872		2507.58	0.04669267		3037.57	0.08238651		3567.57	0.05346381		4097.57	0.16297496
387.8	0.03815241		917.79	0.01840954		1447.79	0.10686361		1977.78	0.12661387		2507.78	0.04752274		3037.77	0.08340342		3567.77	0.05293895		4097.77	0.16281203
388	0.03874102		917.99	0.01813491		1447.99	0.10731469		1977.98	0.12545751		2507.98	0.04888651		3037.97	0.08303349		3567.97	0.05336515		4097.97	0.16258654
388.2	0.03818668		918.19	0.01756766		1448.19	0.10760778		1978.18	0.12433155		2508.18	0.04870853		3038.17	0.08371191		3568.17	0.05346838		4098.17	0.16340392
388.4	0.03657185		918.39	0.01822992		1448.39	0.10708723		1978.38	0.12361095		2508.38	0.04961573		3038.37	0.08392892		3568.37	0.05352233		4098.37	0.16312966
388.6	0.03569967		918.59	0.01856267		1448.59	0.10687477		1978.58	0.12318439		2508.58	0.04987756		3038.57	0.08350149		3568.57	0.05351951		4098.57	0.16280543
388.8	0.03531505		918.79	0.0188293		1448.79	0.10757443		1978.78	0.12283117		2508.78	0.05113785		3038.77	0.08365042		3568.77	0.0528677		4098.77	0.16322374
389	0.03584537		918.99	0.01992938		1448.99	0.10774561		1978.98	0.12324696		2508.98	0.05115901		3038.97	0.08328647		3568.97	0.05239934		4098.97	0.16364405
389.2	0.03592		919.19	0.01901377		1449.19	0.10822342		1979.18	0.12268388		2509.18	0.05132833		3039.17	0.08386007		3569.17	0.05280731		4099.17	0.16315549
389.4	0.03612515		919.39	0.01904985		1449.39	0.10857341		1979.38	0.12313433		2509.38	0.05133833		3039.37	0.0829848		3569.37	0.05187908		4099.37	0.16234827
389.6	0.03620764		919.59	0.01895492		1449.59	0.1094368		1979.58	0.12190075		2509.58	0.05105215		3039.57	0.08294046		3569.57	0.05120188		4099.57	0.16313388
389.8	0.03685405		919.79	0.01950023		1449.79	0.10992028		1979.78	0.12095046		2509.78	0.05072455		3039.77	0.08261605		3569.77	0.05163291		4099.77	0.16307683
390	0.03756446		919.99	0.01990331		1449.99	0.1099027		1979.98	0.11997439		2509.98	0.05029236		3039.97	0.08184153		3569.97	0.05187551		4099.97	0.16360062
390.2	0.03755251		920.19	0.02022984		1450.19	0.10986789		1980.18	0.11975965		2510.18	0.05033172		3040.17	0.08100547		3570.17	0.05192139		4100.17	0.16363345
390.4	0.03741411		920.39	0.02113884		1450.39	0.10911936		1980.38	0.11993055		2510.38	0.05007341		3040.37	0.08103141		3570.37	0.05242005		4100.37	0.16324441
390.6	0.03757905		920.59	0.02118074		1450.59	0.10817176		1980.58	0.12005626		2510.58	0.04940843		3040.57	0.0823364		3570.57	0.0536765		4100.57	0.16380897
390.8	0.0382015		920.79	0.02074908		1450.79	0.10758219		1980.78	0.12086054		2510.78	0.04884583		3040.77	0.08202399		3570.77	0.05333493		4100.77	0.16412096
391	0.03908322		920.99	0.02079494		1450.99	0.1070195		1980.98	0.12125807		2510.98	0.0491673		3040.97	0.08246155		3570.97	0.05338681		4100.97	0.16376854
391.2	0.03921132		921.19	0.02070696		1451.19	0.1064121		1981.18	0.12124654		2511.18	0.04994263		3041.17	0.08271895		3571.17	0.05350692		4101.17	0.16373358
391.4	0.04057881		921.39	0.01969704		1451.39	0.10607348		1981.38	0.12158156		2511.38	0.04927389		3041.37	0.08303762		3571.37	0.05386606		4101.37	0.16421207
391.6	0.04071632		921.59	0.01821423		1451.59	0.10575197		1981.58	0.12111046		2511.58	0.04999095		3041.57	0.08269872		3571.57	0.05335285		4101.57	0.16415632
391.8	0.04016162		921.79	0.01731477		1451.79	0.10527432		1981.78	0.12058572		2511.78	0.05140703		3041.77	0.08310715		3571.77	0.05335154		4101.77	0.16467786
392	0.03974833		921.99	0.01781492		1451.99	0.10485683		1981.98	0.12009152		2511.98	0.05216497		3041.97	0.08285606		3571.97	0.05422141		4101.97	0.16516155
392.2	0.03914726		922.19	0.01799357		1452.19	0.10526397		1982.18	0.12047615		2512.18	0.0530988		3042.17	0.08402057		3572.17	0.05434054		4102.17	0.16427989
392.4	0.03804061		922.39	0.01824802		1452.39	0.10564475		1982.38	0.12065464		2512.38	0.05419106		3042.37	0.08387032		3572.37	0.05391697		4102.37	0.16371071
392.6	0.0380862		922.59	0.01861163		1452.59	0.10634222		1982.58	0.12063811		2512.58	0.05406412		3042.57	0.08318123		3572.57	0.05351948		4102.57	0.16399904
392.8	0.03768821		922.79	0.0190586		1452.79	0.10688361		1982.78	0.1210275		2512.78	0.05402796		3042.77	0.08308404		3572.77	0.05250601		4102.77	0.16472013
393	0.03717329		922.99	0.01875641		1452.99	0.10691302		1982.98	0.12193879		2512.98	0.05283528		3042.97	0.08336123		3572.97	0.05195777		4102.97	0.16461128
393.2	0.0370607		923.19	0.01723261		1453.19	0.10726497		1983.18	0.12167334		2513.18	0.05257601		3043.17	0.08358111		3573.17	0.05142587		4103.17	0.16392245
393.4	0.03649561		923.39	0.01827546		1453.39	0.10718107		1983.38	0.12109783		2513.38	0.05186146		3043.37	0.08292028		3573.37	0.05124102		4103.37	0.16372252
393.6	0.03594402		923.59	0.0184638		1453.59	0.1072564		1983.58	0.1208676		2513.58	0.05117248		3043.57	0.08371698		3573.57	0.0523188		4103.57	0.16483675
393.8	0.03498725		923.79	0.01873343		1453.79	0.10732575		1983.78	0.12055346		2513.78	0.05085277		3043.77	0.08298649		3573.77	0.05216763		4103.77	0.16426121
394	0.03426903		923.99	0.01810749		1453.99	0.10701182		1983.98	0.12031317		2513.98	0.05049465		3043.97	0.08213043		3573.97	0.05311309		4103.97	0.16379055
394.2	0.03361103		924.19	0.01756		1454.19	0.10719402		1984.18	0.12110113		2514.18	0.05015053		3044.17	0.08157701		3574.17	0.05333616		4104.17	0.16324781
394.4	0.03266791		924.39	0.01722909		1454.39	0.10700119		1984.38	0.12181738		2514.38	0.04936339		3044.37	0.08215765		3574.37	0.05449328		4104.37	0.16333327
394.6	0.0323121		924.59	0.01700466		1454.59	0.10590284		1984.58	0.12184046		2514.58	0.04861253		3044.57	0.08195087		3574.57	0.05480475		4104.57	0.16343018
394.8	0.03280059		924.79	0.01729215		1454.79	0.10557716		1984.78	0.12242341		2514.78	0.04854662		3044.77	0.08101733		3574.77	0.05529224		4104.77	0.16269174
395	0.03268721		924.99	0.01683015		1454.99	0.10530262		1984.98	0.12174297		2514.98	0.04900027		3044.97	0.08092768		3574.97	0.05517182		4104.97	0.16302435
395.2	0.03247169		925.19	0.01740867		1455.19	0.10470104		1985.18	0.12059688		2515.18	0.04830594		3045.17	0.08076638		3575.17	0.05476058		4105.17	0.16348054
395.4	0.03260849		925.39	0.01758322		1455.39	0.10468048		1985.38	0.12099639		2515.38	0.04781507		3045.37	0.08042928		3575.37	0.05459712		4105.37	0.1628191
395.6	0.03230515		925.59	0.01752567		1455.59	0.10388782		1985.58	0.1205465		2515.58	0.04793637		3045.57	0.08008576		3575.57	0.05425629		4105.57	0.16245407
395.8	0.03248706		925.79	0.01771004		1455.79	0.10375094		1985.78	0.12104669		2515.78	0.04829284		3045.77	0.07984137		3575.77	0.05437292		4105.77	0.16166458
396	0.03281804		925.99	0.0183495		1455.99	0.10450033		1985.98	0.1208526		2515.98	0.04866208		3045.97	0.08008296		3575.97	0.05427102		4105.97	0.16184154
396.2	0.03372409		926.19	0.01807467		1456.19	0.10584527		1986.18	0.12017088		2516.18	0.0488784		3046.17	0.07995954		3576.17	0.05344269		4106.17	0.16098123
396.4	0.03364484		926.39	0.01830693		1456.39	0.10568765		1986.38	0.11978759		2516.38	0.04780831		3046.37	0.07933052		3576.37	0.0528339		4106.37	0.16167388
396.6	0.03391016		926.59	0.01851044		1456.59	0.10642983		1986.58	0.1194101		2516.58	0.04750176		3046.57	0.07927882		3576.57	0.05187197		4106.57	0.16242424
396.8	0.03316242		926.79	0.01825548		1456.79	0.10651947		1986.78	0.11930188		2516.78	0.04724487		3046.77	0.07980128		3576.77	0.0511798		4106.77	0.16332549
397	0.03330721		926.99	0.01699589		1456.99	0.1068961		1986.98	0.11965899		2516.98	0.04715325		3046.97	0.07979156		3576.97	0.05122084		4106.97	0.16340699
397.2	0.03436179		927.19	0.016263		1457.19	0.1071406		1987.18	0.11869112		2517.18	0.04725234		3047.17	0.0797779		3577.17	0.0512228		4107.17	0.16346373
397.4	0.03329166		927.39	0.01640503		1457.39	0.10741771		1987.38	0.11933073		2517.38	0.04776623		3047.37	0.07993073		3577.37	0.05102241		4107.37	0.16351909
397.6	0.0328608		927.59	0.01621841		1457.59	0.10855095		1987.58	0.1205313		2517.58	0.04818478		3047.57	0.0798231		3577.57	0.05081316		4107.57	0.16422631
397.8	0.03176438		927.79	0.01656592		1457.79	0.10893461		1987.78	0.12058334		2517.78	0.0486381		3047.77	0.07924143		3577.77	0.05077329		4107.77	0.16420442
398	0.03137373		927.99	0.01642934		1457.99	0.10868962		1987.98	0.12025593		2517.98	0.04812458		3047.97	0.07909121		3577.97	0.05172177		4107.97	0.16448993
398.2	0.03137708		928.19	0.01679029		1458.19	0.10862851		1988.18	0.12137886		2518.18	0.04834131		3048.17	0.08032536		3578.17	0.05104443		4108.17	0.16447507
398.4	0.03094224		928.39	0.01690361		1458.39	0.1085596		1988.38	0.12141958		2518.38	0.04784858		3048.37	0.08102833		3578.37	0.05125484		4108.37	0.16409577
398.6	0.03142748		928.59	0.01721142		1458.59	0.10713296		1988.58	0.12208903		2518.58	0.04785638		3048.57	0.08178243		3578.57	0.05102346		4108.57	0.16378678
398.8	0.031854		928.79	0.01752086		1458.79	0.10710185		1988.78	0.1227843		2518.78	0.04779898		3048.77	0.08225602		3578.77	0.05135999		4108.77	0.16261957
399	0.03112613		928.99	0.01814655		1458.99	0.10706729		1988.98	0.12277355		2518.98	0.0479823		3048.97	0.08286293		3578.97	0.05034967		4108.97	0.16184493
399.2	0.03078531		929.19	0.01852168		1459.19	0.10622232		1989.18	0.12273128		2519.18	0.04658285		3049.17	0.08306533		3579.17	0.05038477		4109.17	0.16085714
399.4	0.03094146		929.39	0.01893731		1459.39	0.10641125		1989.38	0.12397678		2519.38	0.04690026		3049.37	0.08317623		3579.37	0.05051298		4109.37	0.15989718
399.6	0.0308781		929.59	0.01811819		1459.59	0.10530643		1989.58	0.12351825		2519.58	0.04708209		3049.57	0.08324609		3579.57	0.05039174		4109.57	0.15959823
399.8	0.03186202		929.79	0.01691442		1459.79	0.10521203		1989.78	0.12346872		2519.78	0.04795243		3049.77	0.08326993		3579.77	0.05032855		4109.77	0.15942106
400	0.0326631		929.99	0.017264		1459.99	0.10499619		1989.98	0.12314449		2519.98	0.04805326		3049.97	0.08363093		3579.97	0.0500114		4109.97	0.15947156
400.2	0.03350016		930.19	0.01739951		1460.19	0.10514046		1990.18	0.12238177		2520.18	0.04780403		3050.17	0.08309686		3580.17	0.04971667		4110.17	0.15885028
400.4	0.03445445		930.39	0.01754277		1460.39	0.10475197		1990.38	0.12199306		2520.38	0.04794399		3050.37	0.08272764		3580.37	0.04973636		4110.37	0.15840065
400.6	0.03467764		930.59	0.0168529		1460.59	0.10550304		1990.58	0.12133861		2520.58	0.04845453		3050.57	0.08230169		3580.57	0.04962778		4110.57	0.15871931
400.8	0.03430698		930.79	0.01720331		1460.79	0.10505041		1990.78	0.12125148		2520.78	0.04849492		3050.77	0.08158736		3580.77	0.04946607		4110.77	0.15886716
401	0.03459156		930.99	0.01715308		1460.99	0.10488034		1990.98	0.12174271		2520.98	0.04876825		3050.97	0.08099225		3580.97	0.04984116		4110.97	0.15913444
401.2	0.03436221		931.19	0.01729631		1461.19	0.10499473		1991.18	0.12180221		2521.18	0.04917027		3051.17	0.08066476		3581.17	0.04970905		4111.17	0.15933845
401.4	0.03329008		931.39	0.01712521		1461.39	0.10514391		1991.38	0.12322598		2521.38	0.0499129		3051.37	0.07976566		3581.37	0.04942407		4111.37	0.15993262
401.6	0.03272413		931.59	0.01806826		1461.59	0.10438178		1991.58	0.12311451		2521.58	0.0504239		3051.57	0.07974242		3581.57	0.05040263		4111.57	0.16068655
401.8	0.03226969		931.79	0.01841952		1461.79	0.10351568		1991.78	0.12359611		2521.78	0.04974881		3051.77	0.0794298		3581.77	0.0505764		4111.77	0.16142062
402	0.03217527		931.99	0.01824936		1461.99	0.10236316		1991.98	0.12353061		2521.98	0.0498253		3051.97	0.07938122		3581.97	0.05022247		4111.97	0.16183155
402.2	0.03174447		932.19	0.01835296		1462.19	0.10166707		1992.18	0.12434249		2522.18	0.05012572		3052.17	0.08031095		3582.17	0.04980883		4112.17	0.16165748
402.4	0.03122924		932.39	0.0181094		1462.39	0.10145203		1992.38	0.12466165		2522.38	0.04918983		3052.37	0.07969785		3582.37	0.04973143		4112.37	0.16213903
402.6	0.03097838		932.59	0.01799273		1462.59	0.10094895		1992.58	0.12505138		2522.58	0.04829555		3052.57	0.08025521		3582.57	0.05026752		4112.57	0.16234151
402.8	0.0308859		932.79	0.01831723		1462.79	0.10144462		1992.78	0.12550854		2522.78	0.04794918		3052.77	0.07957284		3582.77	0.05062681		4112.77	0.16165414
403	0.03035414		932.99	0.01737173		1462.99	0.10256476		1992.98	0.12521119		2522.98	0.04758113		3052.97	0.07941731		3582.97	0.0510613		4112.97	0.16232305
403.2	0.03069419		933.19	0.01647941		1463.19	0.10291153		1993.18	0.12489239		2523.18	0.0457183		3053.17	0.07867564		3583.17	0.05085332		4113.17	0.16369216
403.4	0.03113675		933.39	0.01587625		1463.39	0.10397926		1993.38	0.124455		2523.38	0.04637896		3053.37	0.07789575		3583.37	0.05091987		4113.37	0.16427462
403.6	0.0317985		933.59	0.0140357		1463.59	0.1037874		1993.58	0.12254276		2523.58	0.04714847		3053.57	0.07731439		3583.57	0.05038198		4113.57	0.16418825
403.8	0.03242204		933.79	0.01416405		1463.79	0.1042991		1993.78	0.12205989		2523.78	0.04760417		3053.77	0.07689555		3583.77	0.05004095		4113.77	0.16441449
404	0.0327443		933.99	0.0154404		1463.99	0.10504408		1993.98	0.12085475		2523.98	0.04734295		3053.97	0.07680832		3583.97	0.05019341		4113.97	0.16411412
404.2	0.03325613		934.19	0.01579248		1464.19	0.10595795		1994.18	0.11961175		2524.18	0.04778642		3054.17	0.07673208		3584.17	0.04992179		4114.17	0.16353006
404.4	0.03475345		934.39	0.01633646		1464.39	0.10624667		1994.38	0.11956329		2524.38	0.04786261		3054.37	0.07704783		3584.37	0.0494617		4114.37	0.16256975
404.6	0.03543976		934.59	0.01696186		1464.59	0.10638792		1994.58	0.11960058		2524.58	0.04860652		3054.57	0.07705296		3584.57	0.04996708		4114.57	0.16315991
404.8	0.03584738		934.79	0.01780341		1464.79	0.10597372		1994.78	0.12053224		2524.78	0.04808498		3054.77	0.07705785		3584.77	0.04956388		4114.77	0.16317632
405	0.03601863		934.99	0.01695225		1464.99	0.10630165		1994.98	0.12123278		2524.98	0.04803411		3054.97	0.07699621		3584.97	0.05025683		4114.97	0.16280702
405.2	0.03634956		935.19	0.01645508		1465.19	0.10593137		1995.18	0.12225544		2525.18	0.04774683		3055.17	0.07717932		3585.17	0.05094251		4115.17	0.16231306
405.4	0.03601744		935.39	0.01602458		1465.39	0.10553011		1995.38	0.12246766		2525.38	0.04805543		3055.37	0.07735832		3585.37	0.05080281		4115.37	0.162015
405.6	0.03515136		935.59	0.01686279		1465.59	0.10425664		1995.58	0.12221795		2525.58	0.04771751		3055.57	0.07833827		3585.57	0.0511743		4115.57	0.16215256
405.8	0.03489749		935.79	0.01674655		1465.79	0.10348096		1995.78	0.12286894		2525.78	0.04730262		3055.77	0.0790683		3585.77	0.05044462		4115.77	0.16287959
406	0.03420949		935.99	0.01692001		1465.99	0.10148816		1995.98	0.12315831		2525.98	0.04786476		3055.97	0.07936625		3585.97	0.05109005		4115.97	0.16323817
406.2	0.03278818		936.19	0.01661251		1466.19	0.10076202		1996.18	0.12247663		2526.18	0.04776452		3056.17	0.07922839		3586.17	0.05072177		4116.17	0.16354089
406.4	0.03162361		936.39	0.01728981		1466.39	0.10055856		1996.38	0.12264334		2526.38	0.04721458		3056.37	0.07907907		3586.37	0.05083166		4116.37	0.16409493
406.6	0.03119925		936.59	0.01682876		1466.59	0.10145657		1996.58	0.12217104		2526.58	0.04680412		3056.57	0.07973645		3586.57	0.05123561		4116.57	0.16372848
406.8	0.03107594		936.79	0.01644766		1466.79	0.1018227		1996.78	0.12245702		2526.78	0.04626151		3056.77	0.07865838		3586.77	0.05110776		4116.77	0.16416794
407	0.03053446		936.99	0.01509542		1466.99	0.10256259		1996.98	0.12233396		2526.98	0.04530464		3056.97	0.07829265		3586.97	0.0514838		4116.97	0.16449101
407.2	0.03084345		937.19	0.01539578		1467.19	0.10262612		1997.18	0.12191739		2527.18	0.04500351		3057.17	0.07768893		3587.17	0.05145239		4117.17	0.16363836
407.4	0.03069475		937.39	0.01556478		1467.39	0.10330284		1997.38	0.12151703		2527.38	0.04543127		3057.37	0.07797047		3587.37	0.05122827		4117.37	0.16274611
407.6	0.03036953		937.59	0.01540408		1467.59	0.10240916		1997.58	0.12133772		2527.58	0.0455466		3057.57	0.07771116		3587.57	0.05092429		4117.57	0.16241204
407.8	0.02994346		937.79	0.01635075		1467.79	0.10274189		1997.78	0.12201869		2527.78	0.04643982		3057.77	0.0779886		3587.77	0.05124683		4117.77	0.16210097
408	0.02990455		937.99	0.01675358		1467.99	0.10330588		1997.98	0.1222478		2527.98	0.04687531		3057.97	0.07819357		3587.97	0.05140303		4117.97	0.16200772
408.2	0.03112426		938.19	0.01708326		1468.19	0.10286097		1998.18	0.12373253		2528.18	0.04840568		3058.17	0.07834706		3588.17	0.05102662		4118.17	0.16208848
408.4	0.03154102		938.39	0.01773816		1468.39	0.10309073		1998.38	0.12474734		2528.38	0.04892258		3058.37	0.07827274		3588.37	0.05116312		4118.37	0.16148781
408.6	0.03186772		938.59	0.01758095		1468.59	0.1037727		1998.58	0.12569874		2528.58	0.04943305		3058.57	0.07808315		3588.57	0.05208924		4118.57	0.16204832
408.8	0.03243834		938.79	0.01668587		1468.79	0.10321264		1998.78	0.12619418		2528.78	0.04809431		3058.77	0.07832308		3588.77	0.05102358		4118.77	0.16197685
409	0.03294083		938.99	0.0161246		1468.99	0.10234681		1998.98	0.12601166		2528.98	0.0481732		3058.97	0.07859975		3588.97	0.05117458		4118.97	0.16178031
409.2	0.03422945		939.19	0.01583462		1469.19	0.10188339		1999.18	0.12506535		2529.18	0.04794881		3059.17	0.07933973		3589.17	0.05063887		4119.17	0.16168325
409.4	0.0335585		939.39	0.01477761		1469.39	0.10227555		1999.38	0.12381779		2529.38	0.0489794		3059.37	0.07920703		3589.37	0.04997218		4119.37	0.16292472
409.6	0.03406415		939.59	0.01535224		1469.59	0.10150637		1999.58	0.12341291		2529.58	0.04750975		3059.57	0.07965199		3589.57	0.04985623		4119.57	0.16354653
409.8	0.03398159		939.79	0.01475462		1469.79	0.1008643		1999.78	0.12278253		2529.78	0.04747737		3059.77	0.07997967		3589.77	0.04963338		4119.77	0.16426672
410	0.03346059		939.99	0.01406995		1469.99	0.1004408		1999.98	0.12144644		2529.98	0.0464441		3059.97	0.0796828		3589.97	0.05067911		4119.97	0.16522497
410.2	0.03300774		940.19	0.01320678		1470.19	0.10163923		2000.18	0.11994749		2530.18	0.04651629		3060.17	0.0791267		3590.17	0.05031982		4120.17	0.16475073
410.4	0.03305027		940.39	0.01380733		1470.39	0.10255923		2000.38	0.12001318		2530.38	0.04564399		3060.37	0.07928413		3590.37	0.05048219		4120.37	0.16436929
410.6	0.03321514		940.59	0.01292681		1470.59	0.10268098		2000.58	0.11965767		2530.58	0.04529198		3060.57	0.07945973		3590.57	0.05043376		4120.57	0.16269941
410.8	0.03269379		940.79	0.01233294		1470.79	0.1025953		2000.78	0.11933849		2530.78	0.04468344		3060.77	0.07898662		3590.77	0.05113485		4120.77	0.16167457
411	0.03288312		940.99	0.01197937		1470.99	0.1033627		2000.98	0.11919176		2530.98	0.04374529		3060.97	0.07932793		3590.97	0.05221564		4120.97	0.16030265
411.2	0.03238623		941.19	0.01291607		1471.19	0.10314968		2001.18	0.1189211		2531.18	0.04379342		3061.17	0.07946118		3591.17	0.05247705		4121.17	0.15926536
411.4	0.03236221		941.39	0.01292693		1471.39	0.10334793		2001.38	0.11932893		2531.38	0.04355021		3061.37	0.07890025		3591.37	0.05165035		4121.37	0.15932844
411.6	0.0318321		941.59	0.0134509		1471.59	0.1034472		2001.58	0.11974838		2531.58	0.04376943		3061.57	0.07834787		3591.57	0.05235151		4121.57	0.1587589
411.8	0.03089308		941.79	0.01395817		1471.79	0.10437327		2001.78	0.12110826		2531.78	0.04507442		3061.77	0.07800939		3591.77	0.05316431		4121.77	0.1591429
412	0.02975321		941.99	0.01427116		1471.99	0.10447497		2001.98	0.12245183		2531.98	0.04500762		3061.97	0.07753565		3591.97	0.053545		4121.97	0.15935692
412.2	0.02885039		942.19	0.01478674		1472.19	0.10347777		2002.18	0.12296178		2532.18	0.04564683		3062.17	0.07752094		3592.17	0.05428991		4122.17	0.15934166
412.4	0.02828096		942.39	0.01439185		1472.39	0.10380616		2002.38	0.12275732		2532.38	0.04587922		3062.37	0.076873		3592.37	0.05366915		4122.37	0.15903147
412.6	0.02906224		942.59	0.01362015		1472.59	0.1036779		2002.58	0.12312018		2532.58	0.0456494		3062.57	0.07712666		3592.57	0.05310874		4122.57	0.16014342
412.8	0.02887507		942.79	0.01375633		1472.79	0.10203471		2002.78	0.12248806		2532.78	0.04591142		3062.77	0.07706055		3592.77	0.0518741		4122.77	0.16021118
413	0.02926161		942.99	0.01362785		1472.99	0.10177601		2002.98	0.12176838		2532.98	0.04578416		3062.97	0.07710396		3592.97	0.05262403		4122.97	0.16096427
413.2	0.02955418		943.19	0.01319463		1473.19	0.10187075		2003.18	0.12109492		2533.18	0.04572308		3063.17	0.07686699		3593.17	0.05262501		4123.17	0.16159547
413.4	0.02927711		943.39	0.01339838		1473.39	0.10137589		2003.38	0.1218096		2533.38	0.04591791		3063.37	0.07648368		3593.37	0.05251595		4123.37	0.16221816
413.6	0.03052512		943.59	0.01471923		1473.59	0.10110281		2003.58	0.12183676		2533.58	0.04467586		3063.57	0.07685555		3593.57	0.05236617		4123.57	0.16170537
413.8	0.03044322		943.79	0.01444303		1473.79	0.10109274		2003.78	0.1211187		2533.78	0.04489431		3063.77	0.07694487		3593.77	0.05234388		4123.77	0.16185443
414	0.03110934		943.99	0.01459354		1473.99	0.10111632		2003.98	0.12023276		2533.98	0.04463814		3063.97	0.07712609		3593.97	0.05271169		4123.97	0.16243121
414.2	0.03241011		944.19	0.0145355		1474.19	0.10138462		2004.18	0.12056992		2534.18	0.04486687		3064.17	0.07719671		3594.17	0.05158038		4124.17	0.16121858
414.4	0.03267036		944.39	0.01475061		1474.39	0.10166098		2004.38	0.12022138		2534.38	0.04418111		3064.37	0.0777761		3594.37	0.05144997		4124.37	0.15984135
414.6	0.03268093		944.59	0.01438443		1474.59	0.10174931		2004.58	0.1200037		2534.58	0.04390824		3064.57	0.07866111		3594.57	0.05092714		4124.57	0.15863686
414.8	0.03248591		944.79	0.01444848		1474.79	0.10261461		2004.78	0.12066136		2534.78	0.04310793		3064.77	0.07906582		3594.77	0.05133992		4124.77	0.15758349
415	0.03315667		944.99	0.01519286		1474.99	0.10343952		2004.98	0.12088895		2534.98	0.0422789		3064.97	0.07954547		3594.97	0.05041122		4124.97	0.15758429
415.2	0.0329392		945.19	0.01519165		1475.19	0.10350101		2005.18	0.12069077		2535.18	0.04289215		3065.17	0.079347		3595.17	0.0492353		4125.17	0.15774032
415.4	0.03294007		945.39	0.01502318		1475.39	0.10397261		2005.38	0.12057858		2535.38	0.04264773		3065.37	0.0797019		3595.37	0.04881081		4125.37	0.15795716
415.6	0.03154699		945.59	0.01527764		1475.59	0.10462049		2005.58	0.12054565		2535.58	0.04233873		3065.57	0.08026369		3595.57	0.04878778		4125.57	0.15792133
415.8	0.03111109		945.79	0.01551633		1475.79	0.10504596		2005.78	0.12166077		2535.78	0.04293046		3065.77	0.08080215		3595.77	0.04833052		4125.77	0.15865724
416	0.03094246		945.99	0.01509608		1475.99	0.10521882		2005.98	0.12172803		2535.98	0.04301562		3065.97	0.08034176		3595.97	0.04738428		4125.97	0.15867674
416.2	0.03094512		946.19	0.0151378		1476.19	0.10426913		2006.18	0.12100335		2536.18	0.04346405		3066.17	0.08012764		3596.17	0.04719217		4126.17	0.15902129
416.4	0.03124539		946.39	0.01436303		1476.39	0.10452195		2006.38	0.12073074		2536.38	0.04405714		3066.37	0.07945502		3596.37	0.04647024		4126.37	0.16029694
416.6	0.03105067		946.59	0.01452128		1476.59	0.10429357		2006.58	0.12101551		2536.58	0.04382376		3066.57	0.07905301		3596.57	0.04691543		4126.57	0.16112537
416.8	0.03024985		946.79	0.01461327		1476.79	0.10409349		2006.78	0.12056702		2536.78	0.04427039		3066.77	0.07810156		3596.77	0.04634514		4126.77	0.16087845
417	0.03033422		946.99	0.01499694		1476.99	0.10320862		2006.98	0.12045237		2536.98	0.04447187		3066.97	0.07737572		3596.97	0.04714189		4126.97	0.16230726
417.2	0.03047056		947.19	0.01490167		1477.19	0.10215278		2007.18	0.12081529		2537.18	0.04488784		3067.17	0.07691779		3597.17	0.04777692		4127.17	0.16261548
417.4	0.03010896		947.39	0.01505043		1477.39	0.10198177		2007.38	0.12073221		2537.38	0.04559518		3067.37	0.076614		3597.37	0.04755328		4127.37	0.16301349
417.6	0.03080155		947.59	0.01530699		1477.59	0.10102564		2007.58	0.12100451		2537.58	0.04508166		3067.57	0.0767638		3597.57	0.04837894		4127.57	0.16351527
417.8	0.03090179		947.79	0.01538393		1477.79	0.10049378		2007.78	0.1209992		2537.78	0.04525048		3067.77	0.07684535		3597.77	0.048758		4127.77	0.16384111
418	0.03155692		947.99	0.01574596		1477.99	0.09974074		2007.98	0.1210465		2537.98	0.04556098		3067.97	0.07711617		3597.97	0.04901833		4127.97	0.16381271
418.2	0.03162439		948.19	0.01599222		1478.19	0.10023848		2008.18	0.12119718		2538.18	0.04515341		3068.17	0.07665844		3598.17	0.04938294		4128.17	0.16236522
418.4	0.03122155		948.39	0.01621165		1478.39	0.10060504		2008.38	0.12113667		2538.38	0.0440708		3068.37	0.07667958		3598.37	0.05093133		4128.37	0.16133004
418.6	0.03038313		948.59	0.01583952		1478.59	0.10096081		2008.58	0.12151127		2538.58	0.04299616		3068.57	0.07683666		3598.57	0.05075641		4128.57	0.16052891
418.8	0.0304257		948.79	0.01534148		1478.79	0.10126911		2008.78	0.12219089		2538.78	0.04246203		3068.77	0.07727797		3598.77	0.05097951		4128.77	0.15946097
419	0.03024115		948.99	0.0145879		1478.99	0.10207411		2008.98	0.1212533		2538.98	0.04312218		3068.97	0.07718061		3598.97	0.05016192		4128.97	0.1597762
419.2	0.02995812		949.19	0.01338362		1479.19	0.10250355		2009.18	0.12071716		2539.18	0.04303183		3069.17	0.07744877		3599.17	0.05072113		4129.17	0.15975613
419.4	0.02863184		949.39	0.01327772		1479.39	0.1023261		2009.38	0.12034921		2539.38	0.0430791		3069.37	0.07768943		3599.37	0.05095579		4129.37	0.1594954
419.6	0.02771827		949.59	0.01326334		1479.59	0.10252955		2009.58	0.12043863		2539.58	0.04394467		3069.57	0.07683047		3599.57	0.05016071		4129.57	0.15957122
419.8	0.02849992		949.79	0.01362188		1479.79	0.10255059		2009.78	0.12047916		2539.78	0.044023		3069.77	0.07745244		3599.77	0.05032916		4129.77	0.16022234
420	0.028203		949.99	0.01312994		1479.99	0.10178176		2009.98	0.11951371		2539.98	0.04474342		3069.97	0.07675174		3599.97	0.05030933		4129.97	0.15965596
420.2	0.02762912		950.19	0.0131196		1480.19	0.10188604		2010.18	0.11922099		2540.18	0.04407576		3070.17	0.07665386		3600.17	0.05095694		4130.17	0.15964579
420.4	0.0276799		950.39	0.01276867		1480.39	0.10286379		2010.38	0.11922859		2540.38	0.04403834		3070.37	0.07611031		3600.37	0.05070608		4130.37	0.15942838
420.6	0.02765583		950.59	0.01320298		1480.59	0.103086		2010.58	0.11929847		2540.58	0.04369096		3070.57	0.07635189		3600.57	0.0507358		4130.57	0.15874275
420.8	0.02711194		950.79	0.01390932		1480.79	0.1022288		2010.78	0.11877142		2540.78	0.04403595		3070.77	0.07631944		3600.77	0.05021721		4130.77	0.15877137
421	0.0270861		950.99	0.01394055		1480.99	0.10140709		2010.98	0.11858201		2540.98	0.04424991		3070.97	0.07656446		3600.97	0.05051381		4130.97	0.15878572
421.2	0.02754759		951.19	0.0134867		1481.19	0.10142069		2011.18	0.11881347		2541.18	0.04360282		3071.17	0.07721588		3601.17	0.05125022		4131.17	0.15918081
421.4	0.02726219		951.39	0.01377793		1481.39	0.10126408		2011.38	0.11959744		2541.38	0.04382663		3071.37	0.0775992		3601.37	0.05004872		4131.37	0.15925443
421.6	0.02797477		951.59	0.01497286		1481.59	0.10116424		2011.58	0.12073989		2541.58	0.04357355		3071.57	0.07771606		3601.57	0.04987637		4131.57	0.15907375
421.8	0.02831429		951.79	0.0162087		1481.79	0.10153145		2011.78	0.12117264		2541.78	0.04428664		3071.77	0.07822982		3601.77	0.04910482		4131.77	0.15890825
422	0.02883155		951.99	0.01626037		1481.99	0.10057086		2011.98	0.12065914		2541.98	0.04389615		3071.97	0.07790514		3601.97	0.04955471		4131.97	0.15818895
422.2	0.02872309		952.19	0.01606191		1482.19	0.10167647		2012.18	0.12114511		2542.18	0.0431359		3072.17	0.07731826		3602.17	0.05038844		4132.17	0.15792967
422.4	0.02904953		952.39	0.01584382		1482.39	0.10241803		2012.38	0.12101544		2542.38	0.04280559		3072.37	0.07819094		3602.37	0.05021194		4132.37	0.15807647
422.6	0.02850679		952.59	0.01532077		1482.59	0.103797		2012.58	0.12152753		2542.58	0.04279141		3072.57	0.07856758		3602.57	0.04948783		4132.57	0.15802455
422.8	0.02882641		952.79	0.01508501		1482.79	0.10444709		2012.78	0.12150016		2542.78	0.04356408		3072.77	0.07879168		3602.77	0.04939415		4132.77	0.15887606
423	0.029001		952.99	0.0147907		1482.99	0.10515515		2012.98	0.1215653		2542.98	0.04406666		3072.97	0.07806331		3602.97	0.04910405		4132.97	0.15906453
423.2	0.02942137		953.19	0.01480836		1483.19	0.10559004		2013.18	0.12186308		2543.18	0.04335711		3073.17	0.07807996		3603.17	0.04932518		4133.17	0.15886109
423.4	0.02872438		953.39	0.01547812		1483.39	0.10519185		2013.38	0.12156214		2543.38	0.04356457		3073.37	0.07799594		3603.37	0.04905342		4133.37	0.15864823
423.6	0.02939255		953.59	0.01547174		1483.59	0.10530603		2013.58	0.12097354		2543.58	0.0440161		3073.57	0.0774783		3603.57	0.04823289		4133.57	0.15950797
423.8	0.02961053		953.79	0.01502857		1483.79	0.10463087		2013.78	0.12055442		2543.78	0.04339938		3073.77	0.07792948		3603.77	0.04884588		4133.77	0.16008385
424	0.02882684		953.99	0.01441678		1483.99	0.10437267		2013.98	0.12052586		2543.98	0.04381402		3073.97	0.07797891		3603.97	0.04811248		4133.97	0.15954442
424.2	0.02889594		954.19	0.01377779		1484.19	0.10446649		2014.18	0.12096144		2544.18	0.04376478		3074.17	0.07808148		3604.17	0.04794555		4134.17	0.15977304
424.4	0.02956721		954.39	0.01324072		1484.39	0.10378539		2014.38	0.12075614		2544.38	0.0442052		3074.37	0.07739306		3604.37	0.04816353		4134.37	0.15964335
424.6	0.02854153		954.59	0.01398058		1484.59	0.10263123		2014.58	0.12020289		2544.58	0.04432026		3074.57	0.078665		3604.57	0.04855767		4134.57	0.16039714
424.8	0.02747352		954.79	0.01442909		1484.79	0.10213356		2014.78	0.119323		2544.78	0.04540247		3074.77	0.07820978		3604.77	0.04875796		4134.77	0.16096621
425	0.02713278		954.99	0.01415646		1484.99	0.10247724		2014.98	0.11876259		2544.98	0.0455402		3074.97	0.07799795		3604.97	0.04860434		4134.97	0.16135517
425.2	0.02682241		955.19	0.01453496		1485.19	0.10233175		2015.18	0.11824257		2545.18	0.04524914		3075.17	0.07841333		3605.17	0.04932682		4135.17	0.1626396
425.4	0.02657818		955.39	0.01488758		1485.39	0.10189173		2015.38	0.1189288		2545.38	0.04607302		3075.37	0.07871215		3605.37	0.04862085		4135.37	0.16276592
425.6	0.02664783		955.59	0.01568943		1485.59	0.10193749		2015.58	0.11911717		2545.58	0.04552473		3075.57	0.07864724		3605.57	0.04896723		4135.57	0.16270649
425.8	0.02612469		955.79	0.01570112		1485.79	0.10082121		2015.78	0.11927082		2545.78	0.04591712		3075.77	0.07909109		3605.77	0.04916883		4135.77	0.16238482
426	0.02612175		955.99	0.01528021		1485.99	0.10051136		2015.98	0.11875631		2545.98	0.04566873		3075.97	0.07859923		3605.97	0.05023132		4135.97	0.16242372
426.2	0.02647192		956.19	0.01568386		1486.19	0.10169476		2016.18	0.11866972		2546.18	0.04583499		3076.17	0.07837962		3606.17	0.05002996		4136.17	0.16294648
426.4	0.02704745		956.39	0.01606345		1486.39	0.10261176		2016.38	0.11797114		2546.38	0.0459038		3076.37	0.07839705		3606.37	0.04976089		4136.37	0.16279799
426.6	0.02663403		956.59	0.01547801		1486.59	0.10339439		2016.58	0.1187818		2546.58	0.04542635		3076.57	0.07832929		3606.57	0.04949997		4136.57	0.16278742
426.8	0.02733538		956.79	0.01533489		1486.79	0.10353009		2016.78	0.11926989		2546.78	0.04537689		3076.77	0.077447		3606.77	0.04941438		4136.77	0.16242775
427	0.02865465		956.99	0.01524152		1486.99	0.1044319		2016.98	0.12018472		2546.98	0.0445562		3076.97	0.07695397		3606.97	0.04876048		4136.97	0.16230801
427.2	0.02932758		957.19	0.01554734		1487.19	0.10447613		2017.18	0.11987211		2547.18	0.04396271		3077.17	0.07733593		3607.17	0.04820443		4137.17	0.16211432
427.4	0.02927978		957.39	0.01610094		1487.39	0.10427813		2017.38	0.11966339		2547.38	0.0444163		3077.37	0.07742606		3607.37	0.0472298		4137.37	0.16141885
427.6	0.03002359		957.59	0.01495708		1487.59	0.10395415		2017.58	0.11964573		2547.58	0.04482645		3077.57	0.07730125		3607.57	0.04683906		4137.57	0.16210058
427.8	0.02997357		957.79	0.01465619		1487.79	0.10375632		2017.78	0.11982151		2547.78	0.04432646		3077.77	0.07683954		3607.77	0.04661821		4137.77	0.16179591
428	0.03015895		957.99	0.0135779		1487.99	0.10357249		2017.98	0.12028894		2547.98	0.04429366		3077.97	0.07727476		3607.97	0.04598133		4137.97	0.16102769
428.2	0.03018807		958.19	0.01366921		1488.19	0.10319974		2018.18	0.12008044		2548.18	0.04484378		3078.17	0.07648744		3608.17	0.04684841		4138.17	0.16012231
428.4	0.02980269		958.39	0.01369941		1488.39	0.1031805		2018.38	0.11944375		2548.38	0.04541496		3078.37	0.07591512		3608.37	0.04716525		4138.37	0.16009221
428.6	0.02873287		958.59	0.0147903		1488.59	0.10307984		2018.58	0.11899214		2548.58	0.04549302		3078.57	0.07644368		3608.57	0.04716856		4138.57	0.16066739
428.8	0.02826461		958.79	0.01462173		1488.79	0.1027731		2018.78	0.11805558		2548.78	0.0462716		3078.77	0.0758515		3608.77	0.04783097		4138.77	0.16044159
429	0.02861187		958.99	0.01493373		1488.99	0.10190165		2018.98	0.11805251		2548.98	0.04602503		3078.97	0.07524576		3608.97	0.04825661		4138.97	0.1609682
429.2	0.02870178		959.19	0.01457141		1489.19	0.10134941		2019.18	0.11793877		2549.18	0.04511298		3079.17	0.07587805		3609.17	0.0488763		4139.17	0.16108321
429.4	0.02815569		959.39	0.01492741		1489.39	0.10104727		2019.38	0.11897031		2549.38	0.04427415		3079.37	0.07586851		3609.37	0.04900552		4139.37	0.16047992
429.6	0.02747236		959.59	0.01474479		1489.59	0.10105613		2019.58	0.1182162		2549.58	0.04356386		3079.57	0.07562191		3609.57	0.04907592		4139.57	0.16031336
429.8	0.02648863		959.79	0.01456461		1489.79	0.10100527		2019.78	0.11808537		2549.78	0.04399021		3079.77	0.07500277		3609.77	0.04942222		4139.77	0.16065402
430	0.02758076		959.99	0.01460728		1489.99	0.10111955		2019.98	0.11764705		2549.98	0.04303971		3079.97	0.07445815		3609.97	0.04941942		4139.97	0.16029019
430.2	0.02791744		960.19	0.01452879		1490.19	0.10069018		2020.18	0.11728348		2550.18	0.04211913		3080.17	0.07412232		3610.17	0.04927871		4140.17	0.1603518
430.4	0.02756774		960.39	0.01378547		1490.39	0.10101148		2020.38	0.11810544		2550.38	0.04156376		3080.37	0.07384171		3610.37	0.05007148		4140.37	0.16041089
430.6	0.02743624		960.59	0.01235737		1490.59	0.10149329		2020.58	0.11905273		2550.58	0.04106089		3080.57	0.07398406		3610.57	0.05028952		4140.57	0.16072965
430.8	0.02793425		960.79	0.01230584		1490.79	0.1011359		2020.78	0.1197166		2550.78	0.04073945		3080.77	0.07410487		3610.77	0.0506766		4140.77	0.16146628
431	0.02777846		960.99	0.01247086		1490.99	0.10097111		2020.98	0.11951077		2550.98	0.03998837		3080.97	0.07483463		3610.97	0.05126539		4140.97	0.16156425
431.2	0.02770149		961.19	0.01250428		1491.19	0.10013618		2021.18	0.11918276		2551.18	0.03987707		3081.17	0.07539508		3611.17	0.05083174		4141.17	0.16159334
431.4	0.0275175		961.39	0.01134694		1491.39	0.10055456		2021.38	0.1202011		2551.38	0.04024244		3081.37	0.07556741		3611.37	0.04980885		4141.37	0.16089399
431.6	0.02816933		961.59	0.01025272		1491.59	0.1004407		2021.58	0.12039982		2551.58	0.03989622		3081.57	0.0759574		3611.57	0.04973917		4141.57	0.16117552
431.8	0.02747268		961.79	0.01111546		1491.79	0.10059879		2021.78	0.12000401		2551.78	0.03936147		3081.77	0.07491658		3611.77	0.04903575		4141.77	0.1597497
432	0.02726908		961.99	0.01057093		1491.99	0.10015164		2021.98	0.11985732		2551.98	0.03988464		3081.97	0.07513823		3611.97	0.04973928		4141.97	0.15865732
432.2	0.02681509		962.19	0.01218598		1492.19	0.1007947		2022.18	0.11954045		2552.18	0.04097386		3082.17	0.07477227		3612.17	0.04971174		4142.17	0.15791034
432.4	0.02711017		962.39	0.01254115		1492.39	0.10041708		2022.38	0.1185945		2552.38	0.04185227		3082.37	0.07500346		3612.37	0.04887907		4142.37	0.15872344
432.6	0.0266712		962.59	0.01301898		1492.59	0.1006367		2022.58	0.11881736		2552.58	0.0423299		3082.57	0.07541838		3612.57	0.04914612		4142.57	0.15854961
432.8	0.02687652		962.79	0.01203996		1492.79	0.10109621		2022.78	0.11838499		2552.78	0.04300354		3082.77	0.07628742		3612.77	0.04867132		4142.77	0.15768584
433	0.02687405		962.99	0.01186282		1492.99	0.10135214		2022.98	0.11898147		2552.98	0.04319888		3082.97	0.07596252		3612.97	0.04778949		4142.97	0.15807452
433.2	0.02808765		963.19	0.01124013		1493.19	0.10220929		2023.18	0.11928626		2553.18	0.0430926		3083.17	0.07658613		3613.17	0.04727735		4143.17	0.15783395
433.4	0.02710615		963.39	0.01100408		1493.39	0.10226662		2023.38	0.11971677		2553.38	0.0427454		3083.37	0.07570703		3613.37	0.04720111		4143.37	0.15745444
433.6	0.02719039		963.59	0.01063801		1493.59	0.10202009		2023.58	0.11892218		2553.58	0.04290868		3083.57	0.07630742		3613.57	0.04667205		4143.57	0.15796271
433.8	0.02729624		963.79	0.01063085		1493.79	0.10195719		2023.78	0.11918025		2553.78	0.04254094		3083.77	0.07564903		3613.77	0.04680762		4143.77	0.15751792
434	0.02814153		963.99	0.01088703		1493.99	0.10222606		2023.98	0.11903964		2553.98	0.04214469		3083.97	0.07587776		3613.97	0.04698261		4143.97	0.15698719
434.2	0.02849733		964.19	0.01062093		1494.19	0.10254829		2024.18	0.11850236		2554.18	0.04238294		3084.17	0.07628054		3614.17	0.04747014		4144.17	0.15696738
434.4	0.02839661		964.39	0.00988772		1494.39	0.10322891		2024.38	0.11868943		2554.38	0.04203304		3084.37	0.07667353		3614.37	0.04814897		4144.37	0.15717293
434.6	0.02834932		964.59	0.00964115		1494.59	0.10252079		2024.58	0.11761442		2554.58	0.04281173		3084.57	0.07696761		3614.57	0.04816148		4144.57	0.1573578
434.8	0.02707482		964.79	0.01047329		1494.79	0.10125255		2024.78	0.11678071		2554.78	0.04231646		3084.77	0.07698855		3614.77	0.04820974		4144.77	0.15709215
435	0.0268513		964.99	0.01088787		1494.99	0.10088203		2024.98	0.11622489		2554.98	0.04256421		3084.97	0.07640285		3614.97	0.04790013		4144.97	0.15674215
435.2	0.02623584		965.19	0.01097882		1495.19	0.10080078		2025.18	0.11558075		2555.18	0.04254104		3085.17	0.0758892		3615.17	0.04746215		4145.17	0.15785363
435.4	0.02633085		965.39	0.01118783		1495.39	0.10112371		2025.38	0.11626348		2555.38	0.04269061		3085.37	0.07560926		3615.37	0.04672372		4145.37	0.15716152
435.6	0.02637626		965.59	0.01284808		1495.59	0.1009861		2025.58	0.11546191		2555.58	0.04253225		3085.57	0.07562503		3615.57	0.04693454		4145.57	0.15739657
435.8	0.02609566		965.79	0.01457389		1495.79	0.10068855		2025.78	0.11553915		2555.78	0.04253926		3085.77	0.07505123		3615.77	0.04741674		4145.77	0.15704963
436	0.02613494		965.99	0.01467112		1495.99	0.10130497		2025.98	0.11628608		2555.98	0.04312437		3085.97	0.07531101		3615.97	0.04806894		4145.97	0.15729103
436.2	0.02569007		966.19	0.01608828		1496.19	0.10184273		2026.18	0.1170869		2556.18	0.04264259		3086.17	0.07536455		3616.17	0.04771466		4146.17	0.15805845
436.4	0.02526078		966.39	0.01659706		1496.39	0.10141129		2026.38	0.11793422		2556.38	0.04283442		3086.37	0.07610549		3616.37	0.04819475		4146.37	0.15924692
436.6	0.02493145		966.59	0.0162443		1496.59	0.10234384		2026.58	0.11867389		2556.58	0.04300437		3086.57	0.07766069		3616.57	0.04833491		4146.57	0.15865336
436.8	0.02518665		966.79	0.0152131		1496.79	0.10247911		2026.78	0.11954703		2556.78	0.04278667		3086.77	0.07812543		3616.77	0.04823245		4146.77	0.15890298
437	0.02484109		966.99	0.01470964		1496.99	0.10146687		2026.98	0.12114876		2556.98	0.04212923		3086.97	0.07779765		3616.97	0.04795649		4146.97	0.15933686
437.2	0.02538694		967.19	0.01357285		1497.19	0.10108334		2027.18	0.1223266		2557.18	0.04122267		3087.17	0.07820328		3617.17	0.04826337		4147.17	0.15940214
437.4	0.02420382		967.39	0.0127915		1497.39	0.10018173		2027.38	0.12302819		2557.38	0.04043687		3087.37	0.07756515		3617.37	0.04882057		4147.37	0.15930323
437.6	0.02524415		967.59	0.0125218		1497.59	0.10018012		2027.58	0.12260554		2557.58	0.04002201		3087.57	0.07879877		3617.57	0.04814823		4147.57	0.1592801
437.8	0.02583799		967.79	0.01163483		1497.79	0.10055682		2027.78	0.12250639		2557.78	0.03924647		3087.77	0.07806398		3617.77	0.04837932		4147.77	0.15945098
438	0.0263008		967.99	0.0110619		1497.99	0.10078221		2027.98	0.12232543		2557.98	0.03967361		3087.97	0.07813886		3617.97	0.04898038		4147.97	0.15902994
438.2	0.02626591		968.19	0.01019627		1498.19	0.10117248		2028.18	0.12190653		2558.18	0.03986314		3088.17	0.07830109		3618.17	0.0482648		4148.17	0.15870191
438.4	0.02575295		968.39	0.01083792		1498.39	0.10110468		2028.38	0.12207813		2558.38	0.04014467		3088.37	0.07828667		3618.37	0.0478588		4148.37	0.15892
438.6	0.02446367		968.59	0.01154048		1498.59	0.10101132		2028.58	0.12123642		2558.58	0.04090768		3088.57	0.07762001		3618.57	0.04654307		4148.57	0.15899466
438.8	0.02381488		968.79	0.01160574		1498.79	0.10134013		2028.78	0.12049227		2558.78	0.0403912		3088.77	0.07699592		3618.77	0.04546909		4148.77	0.15860169
439	0.02508983		968.99	0.01183067		1498.99	0.10182676		2028.98	0.12060295		2558.98	0.04183573		3088.97	0.0764164		3618.97	0.04521252		4148.97	0.15903141
439.2	0.02434942		969.19	0.01239487		1499.19	0.10270026		2029.18	0.12062531		2559.18	0.04228328		3089.17	0.07647391		3619.17	0.04509432		4149.17	0.15890071
439.4	0.02567441		969.39	0.01298905		1499.39	0.1030566		2029.38	0.12120863		2559.38	0.04364059		3089.37	0.07621137		3619.37	0.04385676		4149.37	0.15853442
439.6	0.02575285		969.59	0.01354853		1499.59	0.10317555		2029.58	0.12080812		2559.58	0.04409646		3089.57	0.07636962		3619.57	0.04428984		4149.57	0.15864654
439.8	0.02650428		969.79	0.01392083		1499.79	0.10306075		2029.78	0.12080669		2559.78	0.04499787		3089.77	0.07556305		3619.77	0.0442451		4149.77	0.15878942
440	0.02637476		969.99	0.01377522		1499.99	0.10351033		2029.98	0.12060351		2559.98	0.04487873		3089.97	0.07536006		3619.97	0.04439054		4149.97	0.15913729
440.2	0.02599848		970.19	0.01466479		1500.19	0.10347919		2030.18	0.12040009		2560.18	0.04438263		3090.17	0.07483482		3620.17	0.0446114		4150.17	0.15969544
440.4	0.02596309		970.39	0.01482163		1500.39	0.10294742		2030.38	0.11977689		2560.38	0.0450346		3090.37	0.07506644		3620.37	0.04483289		4150.37	0.15915703
440.6	0.02631647		970.59	0.01409793		1500.59	0.10264924		2030.58	0.11881422		2560.58	0.04485967		3090.57	0.07515138		3620.57	0.04427281		4150.57	0.1585606
440.8	0.02580937		970.79	0.01410115		1500.79	0.10103366		2030.78	0.11947169		2560.78	0.04489975		3090.77	0.07465054		3620.77	0.04510879		4150.77	0.15858623
441	0.02544348		970.99	0.01368094		1500.99	0.09972759		2030.98	0.11980509		2560.98	0.04411522		3090.97	0.07480949		3620.97	0.04572952		4150.97	0.15879796
441.2	0.02608152		971.19	0.01337414		1501.19	0.09910148		2031.18	0.11937736		2561.18	0.04438743		3091.17	0.07494231		3621.17	0.04630939		4151.17	0.15866548
441.4	0.02617394		971.39	0.01315174		1501.39	0.09786638		2031.38	0.11881995		2561.38	0.0444363		3091.37	0.07490039		3621.37	0.04652181		4151.37	0.1584376
441.6	0.02677611		971.59	0.01324983		1501.59	0.09757281		2031.58	0.11828622		2561.58	0.04406873		3091.57	0.07569216		3621.57	0.04625379		4151.57	0.15921572
441.8	0.02642855		971.79	0.01296662		1501.79	0.09717886		2031.78	0.1182766		2561.78	0.04325433		3091.77	0.07549744		3621.77	0.04713829		4151.77	0.15992645
442	0.02586289		971.99	0.01275289		1501.99	0.09683572		2031.98	0.11888801		2561.98	0.04359832		3091.97	0.07509205		3621.97	0.04777487		4151.97	0.15931152
442.2	0.02533692		972.19	0.01292338		1502.19	0.09745989		2032.18	0.11964455		2562.18	0.04307671		3092.17	0.07538893		3622.17	0.04676002		4152.17	0.16027933
442.4	0.02452645		972.39	0.01306612		1502.39	0.09720238		2032.38	0.12001377		2562.38	0.04327072		3092.37	0.07599121		3622.37	0.04696709		4152.37	0.15965408
442.6	0.02304388		972.59	0.01275827		1502.59	0.09740592		2032.58	0.12012756		2562.58	0.0436574		3092.57	0.07665408		3622.57	0.04684972		4152.57	0.15978977
442.8	0.02319128		972.79	0.01192013		1502.79	0.09771692		2032.78	0.11987258		2562.78	0.0439587		3092.77	0.07800692		3622.77	0.04751296		4152.77	0.15929121
443	0.02316635		972.99	0.01148028		1502.99	0.09763025		2032.98	0.12017379		2562.98	0.04502975		3092.97	0.07853135		3622.97	0.04801742		4152.97	0.15888935
443.2	0.02214993		973.19	0.01091064		1503.19	0.09824692		2033.18	0.12009806		2563.18	0.04548939		3093.17	0.07843862		3623.17	0.04831442		4153.17	0.15882889
443.4	0.02252564		973.39	0.01048586		1503.39	0.09911554		2033.38	0.11995784		2563.38	0.04519947		3093.37	0.07830897		3623.37	0.04816166		4153.37	0.15888107
443.6	0.02227301		973.59	0.01017755		1503.59	0.10011691		2033.58	0.11939851		2563.58	0.04489114		3093.57	0.07808097		3623.57	0.04890573		4153.57	0.15854582
443.8	0.02302778		973.79	0.01034583		1503.79	0.10119629		2033.78	0.11782505		2563.78	0.04522239		3093.77	0.07786461		3623.77	0.04863925		4153.77	0.1588823
444	0.02313586		973.99	0.00966851		1503.99	0.1017072		2033.98	0.11770133		2563.98	0.04428548		3093.97	0.07725738		3623.97	0.04931018		4153.97	0.15845894
444.2	0.02305942		974.19	0.00947553		1504.19	0.10218058		2034.18	0.11733977		2564.18	0.04427065		3094.17	0.075838		3624.17	0.04926742		4154.17	0.15774696
444.4	0.02332208		974.39	0.01032534		1504.39	0.102107		2034.38	0.11632719		2564.38	0.04456747		3094.37	0.07514723		3624.37	0.04876686		4154.37	0.1568401
444.6	0.02367775		974.59	0.01068508		1504.59	0.1023365		2034.58	0.11603759		2564.58	0.04486276		3094.57	0.07434402		3624.57	0.0490545		4154.57	0.15693688
444.8	0.02405098		974.79	0.0109415		1504.79	0.10222129		2034.78	0.11605835		2564.78	0.04496411		3094.77	0.07379196		3624.77	0.04997992		4154.77	0.15727686
445	0.0242107		974.99	0.01147452		1504.99	0.10216027		2034.98	0.1156158		2564.98	0.04533297		3094.97	0.07305905		3624.97	0.0503395		4154.97	0.15808419
445.2	0.02448234		975.19	0.01173922		1505.19	0.10219596		2035.18	0.11512525		2565.18	0.04548795		3095.17	0.07288201		3625.17	0.04956524		4155.17	0.1580984
445.4	0.0243978		975.39	0.01091842		1505.39	0.10201883		2035.38	0.11563347		2565.38	0.04509051		3095.37	0.07270737		3625.37	0.04860163		4155.37	0.15881372
445.6	0.02541544		975.59	0.01142302		1505.59	0.10231402		2035.58	0.11588348		2565.58	0.0447852		3095.57	0.07254013		3625.57	0.04823208		4155.57	0.16005622
445.8	0.02450292		975.79	0.01075017		1505.79	0.1022328		2035.78	0.11623644		2565.78	0.04418979		3095.77	0.07135457		3625.77	0.04802833		4155.77	0.16083988
446	0.02413517		975.99	0.0105883		1505.99	0.10149831		2035.98	0.11725972		2565.98	0.04480001		3095.97	0.07092281		3625.97	0.0471418		4155.97	0.16079029
446.2	0.02425781		976.19	0.01002447		1506.19	0.10168318		2036.18	0.11773116		2566.18	0.04470598		3096.17	0.07130342		3626.17	0.04706434		4156.17	0.16160997
446.4	0.02457853		976.39	0.01003612		1506.39	0.10145217		2036.38	0.11798982		2566.38	0.04600223		3096.37	0.07196922		3626.37	0.04762055		4156.37	0.16033503
446.6	0.02470615		976.59	0.01074793		1506.59	0.10133015		2036.58	0.11814943		2566.58	0.04624719		3096.57	0.07293897		3626.57	0.04687356		4156.57	0.16086282
446.8	0.02514996		976.79	0.01020348		1506.79	0.10169609		2036.78	0.11771942		2566.78	0.04520859		3096.77	0.07309515		3626.77	0.04727828		4156.77	0.16047703
447	0.02504881		976.99	0.01025694		1506.99	0.10171497		2036.98	0.11737401		2566.98	0.04508897		3096.97	0.07233635		3626.97	0.04763836		4156.97	0.16047389
447.2	0.02517059		977.19	0.01025397		1507.19	0.10168771		2037.18	0.11766737		2567.18	0.0451051		3097.17	0.07181177		3627.17	0.04743812		4157.17	0.16011964
447.4	0.02534643		977.39	0.00977319		1507.39	0.10216553		2037.38	0.11737748		2567.38	0.0442467		3097.37	0.07248235		3627.37	0.04757323		4157.37	0.1586374
447.6	0.02620277		977.59	0.0099006		1507.59	0.1013362		2037.58	0.11692595		2567.58	0.04457787		3097.57	0.0728629		3627.57	0.0476906		4157.57	0.15811123
447.8	0.02624183		977.79	0.00968046		1507.79	0.10056861		2037.78	0.11657		2567.78	0.04433782		3097.77	0.0729925		3627.77	0.04744903		4157.77	0.15746964
448	0.02643972		977.99	0.00928558		1507.99	0.09971342		2037.98	0.11708036		2567.98	0.04375132		3097.97	0.07275327		3627.97	0.04760285		4157.97	0.15629789
448.2	0.02620097		978.19	0.00907211		1508.19	0.09936807		2038.18	0.11671278		2568.18	0.04406117		3098.17	0.07253098		3628.17	0.04724033		4158.17	0.15493125
448.4	0.02607718		978.39	0.01021627		1508.39	0.09901018		2038.38	0.1162421		2568.38	0.04436816		3098.37	0.07298783		3628.37	0.04680257		4158.37	0.15424512
448.6	0.02643958		978.59	0.00984135		1508.59	0.09868729		2038.58	0.11653018		2568.58	0.04445994		3098.57	0.07308106		3628.57	0.04716988		4158.57	0.15397873
448.8	0.02586395		978.79	0.00948965		1508.79	0.09758666		2038.78	0.11696296		2568.78	0.04449433		3098.77	0.07299907		3628.77	0.04706721		4158.77	0.15390432
449	0.02517183		978.99	0.00949372		1508.99	0.09689572		2038.98	0.11742835		2568.98	0.04479831		3098.97	0.07258171		3628.97	0.04706838		4158.97	0.15420578
449.2	0.02521651		979.19	0.00926951		1509.19	0.09721929		2039.18	0.11746908		2569.18	0.04411691		3099.17	0.07327311		3629.17	0.04654529		4159.17	0.1548201
449.4	0.02498022		979.39	0.00905843		1509.39	0.09764456		2039.38	0.11844434		2569.38	0.04386246		3099.37	0.0727316		3629.37	0.04602012		4159.37	0.15635365
449.6	0.02468114		979.59	0.00864012		1509.59	0.09692454		2039.58	0.11825795		2569.58	0.04337373		3099.57	0.07322326		3629.57	0.04538401		4159.57	0.15730333
449.8	0.02398469		979.79	0.00888815		1509.79	0.0973989		2039.78	0.11929262		2569.78	0.04506452		3099.77	0.07337429		3629.77	0.04530643		4159.77	0.15787756
450	0.02473291		979.99	0.00906092		1509.99	0.09735466		2039.98	0.11965913		2569.98	0.04577717		3099.97	0.07385657		3629.97	0.04442248		4159.97	0.1586232
450.2	0.02455296		980.19	0.00888187		1510.19	0.0987307		2040.18	0.11998309		2570.18	0.04594792		3100.17	0.07328545		3630.17	0.04541732		4160.17	0.15928012
450.4	0.02514186		980.39	0.00962439		1510.39	0.09927931		2040.38	0.12041365		2570.38	0.04651081		3100.37	0.07385757		3630.37	0.04541659		4160.37	0.15847546
450.6	0.02475165		980.59	0.01009226		1510.59	0.09924348		2040.58	0.11998889		2570.58	0.04549517		3100.57	0.07360559		3630.57	0.04561528		4160.57	0.15950021
450.8	0.02445831		980.79	0.00910459		1510.79	0.10088644		2040.78	0.11951299		2570.78	0.04519826		3100.77	0.07298024		3630.77	0.04693867		4160.77	0.15939899
451	0.02408459		980.99	0.00906002		1510.99	0.10149865		2040.98	0.11923012		2570.98	0.04513017		3100.97	0.07329758		3630.97	0.04674792		4160.97	0.15951361
451.2	0.02414815		981.19	0.00829028		1511.19	0.1016846		2041.18	0.11953912		2571.18	0.04506654		3101.17	0.07313567		3631.17	0.04577455		4161.17	0.15822298
451.4	0.02399957		981.39	0.00800828		1511.39	0.10201956		2041.38	0.11963237		2571.38	0.04521611		3101.37	0.07378402		3631.37	0.04645423		4161.37	0.15812436
451.6	0.02352964		981.59	0.00826347		1511.59	0.10108586		2041.58	0.11937996		2571.58	0.04524319		3101.57	0.07493354		3631.57	0.04600781		4161.57	0.15850309
451.8	0.02329248		981.79	0.00764025		1511.79	0.10035079		2041.78	0.11916143		2571.78	0.04521753		3101.77	0.07456281		3631.77	0.04546056		4161.77	0.15829351
452	0.02427198		981.99	0.00734684		1511.99	0.0993428		2041.98	0.11852015		2571.98	0.0446875		3101.97	0.07467405		3631.97	0.04562533		4161.97	0.15781402
452.2	0.02474691		982.19	0.00661979		1512.19	0.09901464		2042.18	0.11773817		2572.18	0.04424689		3102.17	0.07526935		3632.17	0.04571878		4162.17	0.15801989
452.4	0.02481216		982.39	0.00713695		1512.39	0.09839212		2042.38	0.11741028		2572.38	0.04362879		3102.37	0.07565768		3632.37	0.04574384		4162.37	0.15849505
452.6	0.02468285		982.59	0.00645038		1512.59	0.09779489		2042.58	0.11673326		2572.58	0.04249174		3102.57	0.07546335		3632.57	0.04570606		4162.57	0.15863421
452.8	0.02374329		982.79	0.00583657		1512.79	0.0966059		2042.78	0.11633974		2572.78	0.04167973		3102.77	0.07458462		3632.77	0.04578381		4162.77	0.15884241
453	0.02379177		982.99	0.00638823		1512.99	0.09695821		2042.98	0.11581276		2572.98	0.04069324		3102.97	0.07390851		3632.97	0.04542515		4162.97	0.15973039
453.2	0.02387326		983.19	0.00725933		1513.19	0.09700866		2043.18	0.11536985		2573.18	0.03976365		3103.17	0.07428504		3633.17	0.04522879		4163.17	0.16099856
453.4	0.0242125		983.39	0.00723265		1513.39	0.09683622		2043.38	0.11571367		2573.38	0.0396586		3103.37	0.07359878		3633.37	0.04496832		4163.37	0.16177286
453.6	0.02485699		983.59	0.00682144		1513.59	0.09568008		2043.58	0.11532884		2573.58	0.03965176		3103.57	0.07415023		3633.57	0.04480034		4163.57	0.16178109
453.8	0.02439606		983.79	0.00805869		1513.79	0.09623717		2043.78	0.11556992		2573.78	0.04112202		3103.77	0.0741812		3633.77	0.0451236		4163.77	0.16154586
454	0.02441237		983.99	0.00815177		1513.99	0.09595506		2043.98	0.11499328		2573.98	0.03994013		3103.97	0.07397473		3633.97	0.04534028		4163.97	0.16203763
454.2	0.02367215		984.19	0.0089345		1514.19	0.0964561		2044.18	0.11566276		2574.18	0.03959253		3104.17	0.07303055		3634.17	0.04755675		4164.17	0.16098911
454.4	0.02408319		984.39	0.00908784		1514.39	0.09640093		2044.38	0.11625457		2574.38	0.03958985		3104.37	0.07317943		3634.37	0.04840981		4164.37	0.16034194
454.6	0.0242052		984.59	0.00951413		1514.59	0.09621262		2044.58	0.11594527		2574.58	0.03914761		3104.57	0.07205668		3634.57	0.04853724		4164.57	0.15982334
454.8	0.02346793		984.79	0.00896302		1514.79	0.09768312		2044.78	0.11618081		2574.78	0.04016399		3104.77	0.07250798		3634.77	0.04864291		4164.77	0.15851284
455	0.02345782		984.99	0.00979728		1514.99	0.09807491		2044.98	0.11670612		2574.98	0.04112461		3104.97	0.0726971		3634.97	0.04775929		4164.97	0.15818304
455.2	0.02375598		985.19	0.01052266		1515.19	0.09809537		2045.18	0.11727968		2575.18	0.04182245		3105.17	0.07252234		3635.17	0.04709483		4165.17	0.15652567
455.4	0.02382145		985.39	0.01140947		1515.39	0.09811033		2045.38	0.11764585		2575.38	0.04211372		3105.37	0.07297855		3635.37	0.04798886		4165.37	0.15649011
455.6	0.02393545		985.59	0.01188827		1515.59	0.0970172		2045.58	0.11703562		2575.58	0.04198926		3105.57	0.0739647		3635.57	0.04815653		4165.57	0.15561677
455.8	0.02471581		985.79	0.01191402		1515.79	0.0964362		2045.78	0.11692043		2575.78	0.04189917		3105.77	0.07377376		3635.77	0.04799452		4165.77	0.15535541
456	0.02535435		985.99	0.0116211		1515.99	0.09651376		2045.98	0.11625228		2575.98	0.04217571		3105.97	0.07455242		3635.97	0.04836539		4165.97	0.1545901
456.2	0.02460724		986.19	0.01150755		1516.19	0.09699197		2046.18	0.11647242		2576.18	0.04224704		3106.17	0.07553435		3636.17	0.04833868		4166.17	0.15483288
456.4	0.02413662		986.39	0.0112179		1516.39	0.09736242		2046.38	0.11570936		2576.38	0.04197112		3106.37	0.07511123		3636.37	0.04783058		4166.37	0.15526555
456.6	0.02413731		986.59	0.01001952		1516.59	0.09745495		2046.58	0.11502015		2576.58	0.04122458		3106.57	0.07437133		3636.57	0.04658577		4166.57	0.15581047
456.8	0.0238929		986.79	0.00915567		1516.79	0.09708957		2046.78	0.11607904		2576.78	0.04136599		3106.77	0.07379676		3636.77	0.0461563		4166.77	0.15668104
457	0.023452		986.99	0.00921115		1516.99	0.09663346		2046.98	0.11563509		2576.98	0.04104291		3106.97	0.07351784		3636.97	0.04577931		4166.97	0.15773003
457.2	0.02295608		987.19	0.0093804		1517.19	0.09637728		2047.18	0.11670213		2577.18	0.04114888		3107.17	0.07351677		3637.17	0.04601742		4167.17	0.15867747
457.4	0.02352853		987.39	0.00886899		1517.39	0.09705068		2047.38	0.11681214		2577.38	0.04192927		3107.37	0.07299163		3637.37	0.04646277		4167.37	0.15842418
457.6	0.02284562		987.59	0.00848586		1517.59	0.09714471		2047.58	0.11666527		2577.58	0.04168378		3107.57	0.07377062		3637.57	0.04561723		4167.57	0.15891944
457.8	0.02198423		987.79	0.00828956		1517.79	0.09793773		2047.78	0.11653551		2577.78	0.04228693		3107.77	0.07380743		3637.77	0.04533292		4167.77	0.15894077
458	0.02211007		987.99	0.00846939		1517.99	0.09761971		2047.98	0.11609875		2577.98	0.04224336		3107.97	0.07349254		3637.97	0.04558671		4167.97	0.15925071
458.2	0.02225923		988.19	0.00839123		1518.19	0.09850588		2048.18	0.11660808		2578.18	0.04209552		3108.17	0.07255853		3638.17	0.04591472		4168.17	0.15861769
458.4	0.02212527		988.39	0.00783741		1518.39	0.09844049		2048.38	0.11628174		2578.38	0.04312012		3108.37	0.07227066		3638.37	0.04465202		4168.37	0.15911923
458.6	0.02219803		988.59	0.00848374		1518.59	0.09846395		2048.58	0.11551096		2578.58	0.04396541		3108.57	0.07211123		3638.57	0.04404534		4168.57	0.15840708
458.8	0.02224625		988.79	0.00841408		1518.79	0.09878167		2048.78	0.11493247		2578.78	0.04472838		3108.77	0.07281703		3638.77	0.04324449		4168.77	0.15790002
459	0.02327839		988.99	0.00883845		1518.99	0.09902584		2048.98	0.11505829		2578.98	0.04478775		3108.97	0.07256032		3638.97	0.04245445		4168.97	0.15758964
459.2	0.02403481		989.19	0.00914391		1519.19	0.09878486		2049.18	0.11494136		2579.18	0.04454559		3109.17	0.0730333		3639.17	0.04298598		4169.17	0.1566799
459.4	0.02457864		989.39	0.00852875		1519.39	0.09879516		2049.38	0.11550547		2579.38	0.04410265		3109.37	0.07310374		3639.37	0.04407099		4169.37	0.15643378
459.6	0.0243342		989.59	0.00865238		1519.59	0.09734064		2049.58	0.11605567		2579.58	0.04400713		3109.57	0.07435067		3639.57	0.04485633		4169.57	0.15563718
459.8	0.02446642		989.79	0.00865311		1519.79	0.09773405		2049.78	0.11677157		2579.78	0.04364005		3109.77	0.07428148		3639.77	0.04516551		4169.77	0.15557669
460	0.02475948		989.99	0.00873211		1519.99	0.09717799		2049.98	0.11697678		2579.98	0.04350977		3109.97	0.07403656		3639.97	0.04497459		4169.97	0.15533712
460.2	0.02399286		990.19	0.00951048		1520.19	0.09684599		2050.18	0.11781139		2580.18	0.04247682		3110.17	0.07411958		3640.17	0.04554982		4170.17	0.15594545
460.4	0.0243195		990.39	0.00902566		1520.39	0.09671166		2050.38	0.1178015		2580.38	0.04146867		3110.37	0.07340914		3640.37	0.04542494		4170.37	0.15658665
460.6	0.02396837		990.59	0.00869657		1520.59	0.09622315		2050.58	0.11867999		2580.58	0.04045647		3110.57	0.07416152		3640.57	0.04582079		4170.57	0.1565569
460.8	0.02355284		990.79	0.00938925		1520.79	0.09596011		2050.78	0.11907517		2580.78	0.04004201		3110.77	0.07447052		3640.77	0.04599345		4170.77	0.15659626
461	0.02248294		990.99	0.00877832		1520.99	0.09532061		2050.98	0.11871858		2580.98	0.03928225		3110.97	0.0746914		3640.97	0.0463579		4170.97	0.15647578
461.2	0.02248828		991.19	0.00878363		1521.19	0.09613795		2051.18	0.11987373		2581.18	0.03944228		3111.17	0.07504317		3641.17	0.04656335		4171.17	0.15608982
461.4	0.02281896		991.39	0.00821737		1521.39	0.09677407		2051.38	0.11882565		2581.38	0.03955569		3111.37	0.07518282		3641.37	0.04618524		4171.37	0.15576009
461.6	0.02205823		991.59	0.0081908		1521.59	0.09603399		2051.58	0.11838517		2581.58	0.03994073		3111.57	0.07525226		3641.57	0.04532056		4171.57	0.15642331
461.8	0.02225429		991.79	0.00744166		1521.79	0.09628148		2051.78	0.11826998		2581.78	0.0402146		3111.77	0.07515672		3641.77	0.04509294		4171.77	0.15608016
462	0.02241521		991.99	0.00804213		1521.99	0.09659903		2051.98	0.11807891		2581.98	0.04046323		3111.97	0.07511242		3641.97	0.04453377		4171.97	0.15580294
462.2	0.02232562		992.19	0.00730592		1522.19	0.09776588		2052.18	0.11853124		2582.18	0.04075694		3112.17	0.07520031		3642.17	0.04422873		4172.17	0.15568224
462.4	0.02203357		992.39	0.00725824		1522.39	0.09776129		2052.38	0.11759106		2582.38	0.04200642		3112.37	0.07567202		3642.37	0.04347853		4172.37	0.15659687
462.6	0.02225067		992.59	0.00699692		1522.59	0.09767702		2052.58	0.11666911		2582.58	0.04237066		3112.57	0.07601375		3642.57	0.04370348		4172.57	0.15594574
462.8	0.02288557		992.79	0.00607616		1522.79	0.09781768		2052.78	0.11608241		2582.78	0.04253707		3112.77	0.07531428		3642.77	0.04353466		4172.77	0.15580091
463	0.02318965		992.99	0.00613103		1522.99	0.09827983		2052.98	0.11685741		2582.98	0.04260721		3112.97	0.0749695		3642.97	0.0439986		4172.97	0.15651007
463.2	0.02354339		993.19	0.00616213		1523.19	0.09817158		2053.18	0.11779271		2583.18	0.04279712		3113.17	0.07518104		3643.17	0.04495135		4173.17	0.15619871
463.4	0.02392937		993.39	0.00529084		1523.39	0.09822507		2053.38	0.11888089		2583.38	0.04229264		3113.37	0.07468497		3643.37	0.04544067		4173.37	0.15655738
463.6	0.02350832		993.59	0.00588792		1523.59	0.09789913		2053.58	0.1192647		2583.58	0.04181922		3113.57	0.07445078		3643.57	0.04673269		4173.57	0.15716046
463.8	0.02383726		993.79	0.00691698		1523.79	0.0975701		2053.78	0.11958656		2583.78	0.04209812		3113.77	0.07337168		3643.77	0.0468814		4173.77	0.1584291
464	0.02340874		993.99	0.00787684		1523.99	0.09639133		2053.98	0.11966903		2583.98	0.04213824		3113.97	0.07338119		3643.97	0.04651205		4173.97	0.15891133
464.2	0.02317884		994.19	0.00943967		1524.19	0.09734663		2054.18	0.11978622		2584.18	0.04243699		3114.17	0.07380518		3644.17	0.04729714		4174.17	0.15852102
464.4	0.02348931		994.39	0.00915877		1524.39	0.0974556		2054.38	0.11978883		2584.38	0.04204147		3114.37	0.07319795		3644.37	0.04737323		4174.37	0.15825893
464.6	0.02292362		994.59	0.00977948		1524.59	0.0976222		2054.58	0.1191169		2584.58	0.04232588		3114.57	0.07336108		3644.57	0.04784749		4174.57	0.15846175
464.8	0.02348938		994.79	0.00940047		1524.79	0.0973327		2054.78	0.11816452		2584.78	0.042019		3114.77	0.07282127		3644.77	0.0474596		4174.77	0.15871676
465	0.02354984		994.99	0.00894894		1524.99	0.09711692		2054.98	0.11771915		2584.98	0.04236934		3114.97	0.07199385		3644.97	0.0474264		4174.97	0.15834524
465.2	0.02420308		995.19	0.00897844		1525.19	0.0971246		2055.18	0.11711765		2585.18	0.04211917		3115.17	0.07224178		3645.17	0.04699776		4175.17	0.15842917
465.4	0.0244465		995.39	0.01017466		1525.39	0.09733786		2055.38	0.1164779		2585.38	0.04161015		3115.37	0.0712182		3645.37	0.0464501		4175.37	0.15799632
465.6	0.02449336		995.59	0.010391		1525.59	0.09665938		2055.58	0.11680201		2585.58	0.04193026		3115.57	0.07034435		3645.57	0.04636032		4175.57	0.15756805
465.8	0.0239375		995.79	0.01007916		1525.79	0.09744856		2055.78	0.11623223		2585.78	0.04159107		3115.77	0.07041809		3645.77	0.04593737		4175.77	0.15731102
466	0.02329378		995.99	0.01031133		1525.99	0.09730111		2055.98	0.115753		2585.98	0.0419423		3115.97	0.07096519		3645.97	0.04538176		4175.97	0.15671852
466.2	0.02243583		996.19	0.00938473		1526.19	0.09734305		2056.18	0.11553899		2586.18	0.04221421		3116.17	0.07167568		3646.17	0.04423863		4176.17	0.15668171
466.4	0.02191664		996.39	0.00933793		1526.39	0.09754579		2056.38	0.11513505		2586.38	0.04150483		3116.37	0.07171534		3646.37	0.04364008		4176.37	0.15643682
466.6	0.02136534		996.59	0.0089871		1526.59	0.09735452		2056.58	0.11539973		2586.58	0.04144901		3116.57	0.07185622		3646.57	0.04313999		4176.57	0.15553073
466.8	0.02146042		996.79	0.0082693		1526.79	0.09794436		2056.78	0.11610154		2586.78	0.0418079		3116.77	0.072225		3646.77	0.04286567		4176.77	0.15476875
467	0.02180173		996.99	0.00800775		1526.99	0.09852649		2056.98	0.11650207		2586.98	0.04102957		3116.97	0.0726526		3646.97	0.04327575		4176.97	0.1542505
467.2	0.02157188		997.19	0.00714425		1527.19	0.09914012		2057.18	0.11687151		2587.18	0.04104276		3117.17	0.07339219		3647.17	0.0436643		4177.17	0.15360212
467.4	0.02128214		997.39	0.00545487		1527.39	0.09836158		2057.38	0.11724533		2587.38	0.04162357		3117.37	0.07392944		3647.37	0.04488655		4177.37	0.15436159
467.6	0.02061659		997.59	0.00472851		1527.59	0.09783311		2057.58	0.11773886		2587.58	0.04166646		3117.57	0.0740885		3647.57	0.04612755		4177.57	0.15444814
467.8	0.0201749		997.79	0.0041936		1527.79	0.09679543		2057.78	0.11843916		2587.78	0.042672		3117.77	0.07498855		3647.77	0.04586158		4177.77	0.15419844
468	0.02032139		997.99	0.00417376		1527.99	0.09740765		2057.98	0.11844997		2587.98	0.04300555		3117.97	0.07521931		3647.97	0.0457638		4177.97	0.15385938
468.2	0.0202549		998.19	0.00440764		1528.19	0.0974294		2058.18	0.11863835		2588.18	0.0427168		3118.17	0.0751921		3648.17	0.04653601		4178.17	0.15381544
468.4	0.02023467		998.39	0.00348298		1528.39	0.09690379		2058.38	0.11945602		2588.38	0.04227842		3118.37	0.07446063		3648.37	0.04686349		4178.37	0.15383633
468.6	0.02067488		998.59	0.00431645		1528.59	0.09749554		2058.58	0.11901268		2588.58	0.04346576		3118.57	0.07406326		3648.57	0.04693774		4178.57	0.1539941
468.8	0.02213931		998.79	0.00424789		1528.79	0.09708356		2058.78	0.11851683		2588.78	0.04221518		3118.77	0.07431432		3648.77	0.04729101		4178.77	0.15461851
469	0.02230021		998.99	0.00535359		1528.99	0.09697382		2058.98	0.11810741		2588.98	0.04200209		3118.97	0.07358656		3648.97	0.04682715		4178.97	0.15495106
469.2	0.02223084		999.19	0.0055741		1529.19	0.09737174		2059.18	0.11793514		2589.18	0.04097925		3119.17	0.07365031		3649.17	0.04671449		4179.17	0.15580581
469.4	0.02196885		999.39	0.00685278		1529.39	0.09688999		2059.38	0.11820322		2589.38	0.04058192		3119.37	0.07294547		3649.37	0.04600044		4179.37	0.15560806
469.6	0.02199357		999.59	0.00712194		1529.59	0.09541192		2059.58	0.11755281		2589.58	0.04038778		3119.57	0.07285203		3649.57	0.04661413		4179.57	0.15611806
469.8	0.02168557		999.79	0.00776245		1529.79	0.09488744		2059.78	0.11676879		2589.78	0.04022327		3119.77	0.07322756		3649.77	0.04713772		4179.77	0.15640556
470	0.02229582		999.99	0.00870876		1529.99	0.09364842		2059.98	0.1168768		2589.98	0.04039881		3119.97	0.07427703		3649.97	0.04631776		4179.97	0.1560462
470.2	0.02202043		1000.19	0.00898767		1530.19	0.09380614		2060.18	0.11670191		2590.18	0.04013601		3120.17	0.07463897		3650.17	0.04565776		4180.17	0.15607625
470.4	0.02130782		1000.39	0.00900091		1530.39	0.09422231		2060.38	0.11714556		2590.38	0.03968762		3120.37	0.07459288		3650.37	0.04592434		4180.37	0.15555304
470.6	0.02127183		1000.59	0.00979962		1530.59	0.09452287		2060.58	0.11740394		2590.58	0.04053061		3120.57	0.07513769		3650.57	0.04580122		4180.57	0.15492881
470.8	0.02217691		1000.79	0.00861798		1530.79	0.09479638		2060.78	0.11677705		2590.78	0.0406856		3120.77	0.07486857		3650.77	0.04615019		4180.77	0.15400431
471	0.02220647		1000.99	0.00844276		1530.99	0.0945245		2060.98	0.1155406		2590.98	0.04009762		3120.97	0.07500815		3650.97	0.04601863		4180.97	0.15322091
471.2	0.02131005		1001.19	0.00753712		1531.19	0.09429383		2061.18	0.11599097		2591.18	0.04032904		3121.17	0.07605417		3651.17	0.04649752		4181.17	0.15296991
471.4	0.02069072		1001.39	0.00683896		1531.39	0.09410982		2061.38	0.11647583		2591.38	0.04134251		3121.37	0.07615913		3651.37	0.04698285		4181.37	0.15242364
471.6	0.02049		1001.59	0.00610008		1531.59	0.09469025		2061.58	0.1162135		2591.58	0.04129939		3121.57	0.07577635		3651.57	0.04707077		4181.57	0.15211496
471.8	0.02057489		1001.79	0.00586569		1531.79	0.09509352		2061.78	0.11570896		2591.78	0.04162676		3121.77	0.07600893		3651.77	0.04679266		4181.77	0.15202622
472	0.02064421		1001.99	0.00629915		1531.99	0.0961837		2061.98	0.11551492		2591.98	0.04143393		3121.97	0.0755046		3651.97	0.04657814		4181.97	0.15223362
472.2	0.02034806		1002.19	0.0067098		1532.19	0.09606647		2062.18	0.11590969		2592.18	0.04094959		3122.17	0.07560264		3652.17	0.04624274		4182.17	0.15261408
472.4	0.02068459		1002.39	0.00607348		1532.39	0.09687702		2062.38	0.11603449		2592.38	0.04122118		3122.37	0.07551987		3652.37	0.04537008		4182.37	0.15210569
472.6	0.02080815		1002.59	0.0068994		1532.59	0.09690441		2062.58	0.11609193		2592.58	0.04230521		3122.57	0.07547902		3652.57	0.04473321		4182.57	0.15218692
472.8	0.02055635		1002.79	0.00663599		1532.79	0.09655444		2062.78	0.11603241		2592.78	0.04151885		3122.77	0.07467954		3652.77	0.04486153		4182.77	0.15291614
473	0.02011584		1002.99	0.00660246		1532.99	0.09630055		2062.98	0.11558845		2592.98	0.04225029		3122.97	0.07441013		3652.97	0.04377917		4182.97	0.15288961
473.2	0.01964131		1003.19	0.00637339		1533.19	0.09659467		2063.18	0.11654836		2593.18	0.04292645		3123.17	0.07516005		3653.17	0.04411863		4183.17	0.15278462
473.4	0.01995956		1003.39	0.00617208		1533.39	0.09517632		2063.38	0.11704413		2593.38	0.04314194		3123.37	0.07513159		3653.37	0.04400542		4183.37	0.1520829
473.6	0.02009694		1003.59	0.00661527		1533.59	0.09491554		2063.58	0.11673962		2593.58	0.04379111		3123.57	0.07446101		3653.57	0.04538494		4183.57	0.15201398
473.8	0.02002186		1003.79	0.00684759		1533.79	0.09461714		2063.78	0.11721849		2593.78	0.04450194		3123.77	0.07430343		3653.77	0.04648151		4183.77	0.1516189
474	0.02024848		1003.99	0.00717418		1533.99	0.09440463		2063.98	0.11763728		2593.98	0.0448206		3123.97	0.07478379		3653.97	0.04709975		4183.97	0.15129398
474.2	0.01939588		1004.19	0.00541331		1534.19	0.09510179		2064.18	0.11688779		2594.18	0.04477645		3124.17	0.07490385		3654.17	0.04773631		4184.17	0.15120542
474.4	0.01883019		1004.39	0.0049212		1534.39	0.09580151		2064.38	0.11681826		2594.38	0.04455628		3124.37	0.07389582		3654.37	0.04810747		4184.37	0.15136452
474.6	0.01863349		1004.59	0.00490079		1534.59	0.09559784		2064.58	0.11629469		2594.58	0.04532908		3124.57	0.07363959		3654.57	0.04874315		4184.57	0.15120793
474.8	0.0186535		1004.79	0.00410148		1534.79	0.09590176		2064.78	0.1154846		2594.78	0.0445065		3124.77	0.07287446		3654.77	0.04811761		4184.77	0.15153207
475	0.0173562		1004.99	0.0043498		1534.99	0.09632304		2064.98	0.11540311		2594.98	0.04416099		3124.97	0.07431424		3654.97	0.0470653		4184.97	0.15104476
475.2	0.01646336		1005.19	0.00356438		1535.19	0.09692707		2065.18	0.11529448		2595.18	0.04383633		3125.17	0.0745177		3655.17	0.04783101		4185.17	0.15159149
475.4	0.01615164		1005.39	0.00434693		1535.39	0.09767525		2065.38	0.11527445		2595.38	0.04462204		3125.37	0.07386529		3655.37	0.04770831		4185.37	0.1519821
475.6	0.01645046		1005.59	0.00359478		1535.59	0.0972743		2065.58	0.11484311		2595.58	0.04362849		3125.57	0.0731832		3655.57	0.04779213		4185.57	0.15215431
475.8	0.01657564		1005.79	0.00348891		1535.79	0.09740465		2065.78	0.11467184		2595.78	0.04262843		3125.77	0.073797		3655.77	0.04720341		4185.77	0.15222164
476	0.01676736		1005.99	0.00365225		1535.99	0.09728299		2065.98	0.11428757		2595.98	0.04217454		3125.97	0.07448837		3655.97	0.04599899		4185.97	0.15272988
476.2	0.01742314		1006.19	0.00407516		1536.19	0.09655308		2066.18	0.11458745		2596.18	0.04204592		3126.17	0.07508403		3656.17	0.04519776		4186.17	0.15345001
476.4	0.01705718		1006.39	0.00340709		1536.39	0.09605407		2066.38	0.11473072		2596.38	0.04217843		3126.37	0.07542267		3656.37	0.04423386		4186.37	0.15415441
476.6	0.01635475		1006.59	0.00354798		1536.59	0.0946083		2066.58	0.11518109		2596.58	0.04211358		3126.57	0.07492993		3656.57	0.043621		4186.57	0.15442369
476.8	0.01714611		1006.79	0.00445645		1536.79	0.09409195		2066.78	0.11444313		2596.78	0.04192372		3126.77	0.07408342		3656.77	0.04335923		4186.77	0.15518408
477	0.01742056		1006.99	0.00428982		1536.99	0.092993		2066.98	0.11523744		2596.98	0.04170918		3126.97	0.0747361		3656.97	0.04298039		4186.97	0.15601911
477.2	0.01756582		1007.19	0.00469627		1537.19	0.09253274		2067.18	0.11612677		2597.18	0.0415836		3127.17	0.07455078		3657.17	0.04382514		4187.17	0.15684563
477.4	0.01890847		1007.39	0.00535018		1537.39	0.09187412		2067.38	0.11594065		2597.38	0.04041598		3127.37	0.07251921		3657.37	0.04352984		4187.37	0.15739759
477.6	0.01945201		1007.59	0.00569002		1537.59	0.09172285		2067.58	0.1163741		2597.58	0.04041119		3127.57	0.07166088		3657.57	0.04404315		4187.57	0.15841546
477.8	0.02041394		1007.79	0.00558364		1537.79	0.0911096		2067.78	0.11660209		2597.78	0.03957942		3127.77	0.0716797		3657.77	0.04524971		4187.77	0.15839702
478	0.02103541		1007.99	0.00553155		1537.99	0.09110658		2067.98	0.11655168		2597.98	0.03867151		3127.97	0.07090165		3657.97	0.04597352		4187.97	0.15887728
478.2	0.02024599		1008.19	0.00485608		1538.19	0.09107421		2068.18	0.11588966		2598.18	0.03866649		3128.17	0.07005667		3658.17	0.04560504		4188.17	0.15971425
478.4	0.01996485		1008.39	0.0053702		1538.39	0.09186725		2068.38	0.11624455		2598.38	0.03810792		3128.37	0.06897652		3658.37	0.04611618		4188.37	0.15990078
478.6	0.01962732		1008.59	0.0057552		1538.59	0.09200828		2068.58	0.11623549		2598.58	0.03711666		3128.57	0.06849252		3658.57	0.04550046		4188.57	0.15939477
478.8	0.01942217		1008.79	0.0059577		1538.79	0.0936546		2068.78	0.11639154		2598.78	0.0359789		3128.77	0.06845313		3658.77	0.04502108		4188.77	0.15898367
479	0.01884147		1008.99	0.00651958		1538.99	0.09381348		2068.98	0.11636892		2598.98	0.0364725		3128.97	0.06971863		3658.97	0.0448184		4188.97	0.15860501
479.2	0.0187524		1009.19	0.00631418		1539.19	0.09430573		2069.18	0.11634228		2599.18	0.03603612		3129.17	0.06879121		3659.17	0.04619241		4189.17	0.15834883
479.4	0.01868528		1009.39	0.0065764		1539.39	0.09490682		2069.38	0.11746332		2599.38	0.03707151		3129.37	0.06797205		3659.37	0.04624344		4189.37	0.15775928
479.6	0.01806479		1009.59	0.00647091		1539.59	0.09524965		2069.58	0.11683957		2599.58	0.03693343		3129.57	0.0678189		3659.57	0.04587035		4189.57	0.15640673
479.8	0.01762746		1009.79	0.00682076		1539.79	0.09586669		2069.78	0.11660364		2599.78	0.03775928		3129.77	0.06961632		3659.77	0.04535452		4189.77	0.15635535
480	0.01712414		1009.99	0.00665189		1539.99	0.09501892		2069.98	0.11637026		2599.98	0.03898918		3129.97	0.07005841		3659.97	0.0449867		4189.97	0.1564639
480.2	0.01624686		1010.19	0.00634602		1540.19	0.0949758		2070.18	0.11709639		2600.18	0.03926425		3130.17	0.07083467		3660.17	0.04485559		4190.17	0.15537033
480.4	0.01500557		1010.39	0.00576965		1540.39	0.09518251		2070.38	0.11674186		2600.38	0.03984816		3130.37	0.07209046		3660.37	0.04404908		4190.37	0.1553086
480.6	0.0147359		1010.59	0.00492267		1540.59	0.0948844		2070.58	0.11727692		2600.58	0.04065991		3130.57	0.07254672		3660.57	0.04416465		4190.57	0.15429324
480.8	0.01512639		1010.79	0.00505917		1540.79	0.09490282		2070.78	0.11756686		2600.78	0.04155814		3130.77	0.07323428		3660.77	0.04420447		4190.77	0.15465864
481	0.01479172		1010.99	0.00384953		1540.99	0.09458892		2070.98	0.11797521		2600.98	0.0418269		3130.97	0.07438306		3660.97	0.04413522		4190.97	0.1546002
481.2	0.0148851		1011.19	0.00405591		1541.19	0.09439712		2071.18	0.1177866		2601.18	0.04254381		3131.17	0.07412833		3661.17	0.04395791		4191.17	0.15486531
481.4	0.01527357		1011.39	0.0042855		1541.39	0.09486202		2071.38	0.11755459		2601.38	0.04225481		3131.37	0.07405248		3661.37	0.04327588		4191.37	0.15434062
481.6	0.01518788		1011.59	0.00442574		1541.59	0.09440744		2071.58	0.11771112		2601.58	0.04289769		3131.57	0.0741853		3661.57	0.04234691		4191.57	0.15440127
481.8	0.01497597		1011.79	0.00477964		1541.79	0.0942632		2071.78	0.11631321		2601.78	0.04310713		3131.77	0.0742709		3661.77	0.04247488		4191.77	0.15421897
482	0.01499276		1011.99	0.00530692		1541.99	0.09432827		2071.98	0.1162691		2601.98	0.04333121		3131.97	0.07420651		3661.97	0.0424867		4191.97	0.15491895
482.2	0.01449484		1012.19	0.00516069		1542.19	0.09461259		2072.18	0.11588513		2602.18	0.04301366		3132.17	0.07395985		3662.17	0.04226758		4192.17	0.15472504
482.4	0.01537108		1012.39	0.00559869		1542.39	0.0952487		2072.38	0.11548771		2602.38	0.04209001		3132.37	0.07419068		3662.37	0.0428899		4192.37	0.15444931
482.6	0.01640165		1012.59	0.00600485		1542.59	0.09467591		2072.58	0.11508479		2602.58	0.04119545		3132.57	0.0740487		3662.57	0.04229252		4192.57	0.15442473
482.8	0.01789425		1012.79	0.00655335		1542.79	0.09507219		2072.78	0.11513536		2602.78	0.04132534		3132.77	0.07465711		3662.77	0.04378329		4192.77	0.15560857
483	0.01912816		1012.99	0.00770012		1542.99	0.09487812		2072.98	0.11472465		2602.98	0.04130346		3132.97	0.07393124		3662.97	0.04383677		4192.97	0.15641546
483.2	0.01917538		1013.19	0.0077743		1543.19	0.09539015		2073.18	0.11488786		2603.18	0.04130133		3133.17	0.07261734		3663.17	0.04484283		4193.17	0.15661201
483.4	0.01989265		1013.39	0.00833291		1543.39	0.09584775		2073.38	0.11482773		2603.38	0.04128246		3133.37	0.07211475		3663.37	0.04553797		4193.37	0.15708665
483.6	0.02008152		1013.59	0.00859154		1543.59	0.09635953		2073.58	0.11438383		2603.58	0.04082605		3133.57	0.07235433		3663.57	0.04547608		4193.57	0.1563906
483.8	0.02092046		1013.79	0.00836625		1543.79	0.09600092		2073.78	0.11496324		2603.78	0.04054754		3133.77	0.07300469		3663.77	0.04469631		4193.77	0.1566281
484	0.02135044		1013.99	0.00757753		1543.99	0.09497352		2073.98	0.11535558		2603.98	0.03934456		3133.97	0.07253298		3663.97	0.04457534		4193.97	0.15646052
484.2	0.02095089		1014.19	0.00631673		1544.19	0.0962656		2074.18	0.1162233		2604.18	0.03855953		3134.17	0.07272528		3664.17	0.04422991		4194.17	0.15570629
484.4	0.02112233		1014.39	0.0059527		1544.39	0.09615396		2074.38	0.11633882		2604.38	0.03894425		3134.37	0.07342107		3664.37	0.04412755		4194.37	0.15580343
484.6	0.02170693		1014.59	0.00463695		1544.59	0.09590044		2074.58	0.1164138		2604.58	0.03858436		3134.57	0.07292439		3664.57	0.04472167		4194.57	0.15540513
484.8	0.021354		1014.79	0.00499431		1544.79	0.09526308		2074.78	0.11643494		2604.78	0.03833771		3134.77	0.07305195		3664.77	0.04490695		4194.77	0.15549599
485	0.0208954		1014.99	0.00547717		1544.99	0.09466402		2074.98	0.11623786		2604.98	0.03848161		3134.97	0.07377085		3664.97	0.0448395		4194.97	0.154564
485.2	0.01993517		1015.19	0.00594847		1545.19	0.09506781		2075.18	0.11605501		2605.18	0.03884302		3135.17	0.07374028		3665.17	0.04480071		4195.17	0.15372605
485.4	0.01923857		1015.39	0.00544348		1545.39	0.09473502		2075.38	0.11518122		2605.38	0.03872001		3135.37	0.07413773		3665.37	0.04469288		4195.37	0.15244578
485.6	0.0189233		1015.59	0.00599579		1545.59	0.09418369		2075.58	0.11489813		2605.58	0.03990167		3135.57	0.07355289		3665.57	0.04434545		4195.57	0.15264163
485.8	0.0177413		1015.79	0.0052656		1545.79	0.09389667		2075.78	0.11409478		2605.78	0.03989574		3135.77	0.07357403		3665.77	0.04500239		4195.77	0.15179478
486	0.01735694		1015.99	0.00501002		1545.99	0.0938054		2075.98	0.11420045		2605.98	0.03979969		3135.97	0.07439669		3665.97	0.04478163		4195.97	0.15135868
486.2	0.01710876		1016.19	0.00463237		1546.19	0.09352621		2076.18	0.11375337		2606.18	0.04011618		3136.17	0.07406568		3666.17	0.04432721		4196.17	0.15038662
486.4	0.01760511		1016.39	0.00507007		1546.39	0.09325443		2076.38	0.11444027		2606.38	0.04025202		3136.37	0.07446229		3666.37	0.04494205		4196.37	0.15009378
486.6	0.01805829		1016.59	0.00541455		1546.59	0.09345781		2076.58	0.11535844		2606.58	0.04016829		3136.57	0.07420803		3666.57	0.0446176		4196.57	0.15017086
486.8	0.01786052		1016.79	0.00590636		1546.79	0.09355165		2076.78	0.1151543		2606.78	0.04064602		3136.77	0.07413598		3666.77	0.0445757		4196.77	0.15078068
487	0.01753692		1016.99	0.00645826		1546.99	0.0940329		2076.98	0.11562278		2606.98	0.04157618		3136.97	0.07328649		3666.97	0.04407214		4196.97	0.15047508
487.2	0.01758349		1017.19	0.00615237		1547.19	0.09389309		2077.18	0.11656187		2607.18	0.04231924		3137.17	0.07327807		3667.17	0.04445656		4197.17	0.15089655
487.4	0.01790809		1017.39	0.00570512		1547.39	0.09446379		2077.38	0.11653191		2607.38	0.04227096		3137.37	0.07316636		3667.37	0.04486719		4197.37	0.1513259
487.6	0.01825856		1017.59	0.00492525		1547.59	0.09514475		2077.58	0.11730115		2607.58	0.04178799		3137.57	0.07340692		3667.57	0.04366768		4197.57	0.15104538
487.8	0.01756675		1017.79	0.00449744		1547.79	0.0945383		2077.78	0.11801099		2607.78	0.04168734		3137.77	0.07283059		3667.77	0.04343504		4197.77	0.15141184
488	0.01730225		1017.99	0.00459435		1547.99	0.09463805		2077.98	0.11801389		2607.98	0.04154341		3137.97	0.07260637		3667.97	0.04342268		4197.97	0.15249011
488.2	0.01710359		1018.19	0.00472936		1548.19	0.09518352		2078.18	0.11801125		2608.18	0.04173825		3138.17	0.07236535		3668.17	0.0432747		4198.17	0.15217339
488.4	0.01720137		1018.39	0.00562261		1548.39	0.09483335		2078.38	0.11737602		2608.38	0.04159138		3138.37	0.07310086		3668.37	0.04353166		4198.37	0.15307839
488.6	0.01783335		1018.59	0.00541844		1548.59	0.09505101		2078.58	0.11617731		2608.58	0.04071816		3138.57	0.07298669		3668.57	0.04444859		4198.57	0.15414522
488.8	0.01782027		1018.79	0.00632465		1548.79	0.09425488		2078.78	0.11578925		2608.78	0.04015953		3138.77	0.07323744		3668.77	0.0447949		4198.77	0.1549259
489	0.01760578		1018.99	0.00623875		1548.99	0.09359671		2078.98	0.11511779		2608.98	0.03964512		3138.97	0.07351301		3668.97	0.04488581		4198.97	0.15494185
489.2	0.01729045		1019.19	0.00613656		1549.19	0.09304736		2079.18	0.11451164		2609.18	0.03908834		3139.17	0.07364315		3669.17	0.04519882		4199.17	0.15501167
489.4	0.01697081		1019.39	0.00562947		1549.39	0.09141586		2079.38	0.11383176		2609.38	0.03900966		3139.37	0.07336659		3669.37	0.04514031		4199.37	0.1555853
489.6	0.01645616		1019.59	0.00651751		1549.59	0.09088721		2079.58	0.11318971		2609.58	0.03943598		3139.57	0.07255818		3669.57	0.04540266		4199.57	0.15576341
489.8	0.01592435		1019.79	0.0067855		1549.79	0.08983002		2079.78	0.1127261		2609.78	0.03930767		3139.77	0.07244074		3669.77	0.0459605		4199.77	0.15539115
490	0.01652829		1019.99	0.00711862		1549.99	0.08946525		2079.98	0.11235432		2609.98	0.03979517		3139.97	0.07327448		3669.97	0.04582803		4199.97	0.1551115
490.2	0.01606304		1020.19	0.00719159		1550.19	0.08909676		2080.18	0.1130638		2610.18	0.03927378		3140.17	0.07346665		3670.17	0.04640582		4200.17	0.154896
490.4	0.0168762		1020.39	0.0079964		1550.39	0.0893071		2080.38	0.11423649		2610.38	0.03909008		3140.37	0.07357739		3670.37	0.04692898		4200.37	0.15486351
490.6	0.01692393		1020.59	0.00842796		1550.59	0.08871161		2080.58	0.11442045		2610.58	0.03894734		3140.57	0.07322498		3670.57	0.04657585		4200.57	0.15504434
490.8	0.01658625		1020.79	0.00810244		1550.79	0.08843809		2080.78	0.11397561		2610.78	0.03959618		3140.77	0.07320744		3670.77	0.04609986		4200.77	0.1558062
491	0.01744226		1020.99	0.00823512		1550.99	0.088753		2080.98	0.11526328		2610.98	0.04016977		3140.97	0.07286175		3670.97	0.04583068		4200.97	0.15564322
491.2	0.0179924		1021.19	0.0080294		1551.19	0.08934965		2081.18	0.11522646		2611.18	0.04015001		3141.17	0.07339778		3671.17	0.04533271		4201.17	0.15515989
491.4	0.01751884		1021.39	0.00749288		1551.39	0.08966024		2081.38	0.11524414		2611.38	0.03934978		3141.37	0.07408923		3671.37	0.04582996		4201.37	0.15494211
491.6	0.01726648		1021.59	0.00793508		1551.59	0.08964026		2081.58	0.11649026		2611.58	0.03902979		3141.57	0.07395808		3671.57	0.04494923		4201.57	0.15468334
491.8	0.01650592		1021.79	0.00773863		1551.79	0.08963848		2081.78	0.11638668		2611.78	0.0387981		3141.77	0.07367769		3671.77	0.04497879		4201.77	0.15430254
492	0.01711083		1021.99	0.00852545		1551.99	0.09088424		2081.98	0.11599292		2611.98	0.0387974		3141.97	0.07366344		3671.97	0.04419884		4201.97	0.15411853
492.2	0.01664423		1022.19	0.00852196		1552.19	0.09158518		2082.18	0.11570107		2612.18	0.03835454		3142.17	0.07327869		3672.17	0.04352966		4202.17	0.15433081
492.4	0.01562414		1022.39	0.00784118		1552.39	0.0921306		2082.38	0.11499184		2612.38	0.03869651		3142.37	0.07290695		3672.37	0.04359314		4202.37	0.15548677
492.6	0.01580914		1022.59	0.00705321		1552.59	0.09223737		2082.58	0.11425435		2612.58	0.03799325		3142.57	0.07232		3672.57	0.04264089		4202.57	0.15542989
492.8	0.01585831		1022.79	0.00783462		1552.79	0.0913447		2082.78	0.11409035		2612.78	0.03821952		3142.77	0.07192022		3672.77	0.04105084		4202.77	0.15581549
493	0.01524105		1022.99	0.00695471		1552.99	0.09124376		2082.98	0.11425493		2612.98	0.03772986		3142.97	0.07158302		3672.97	0.04116194		4202.97	0.15553775
493.2	0.01530603		1023.19	0.00733782		1553.19	0.09146651		2083.18	0.11465715		2613.18	0.03791515		3143.17	0.0712583		3673.17	0.04155441		4203.17	0.15444293
493.4	0.0147216		1023.39	0.00777277		1553.39	0.09153403		2083.38	0.11431659		2613.38	0.03950524		3143.37	0.07106064		3673.37	0.04166071		4203.37	0.15423421
493.6	0.01398961		1023.59	0.00785054		1553.59	0.09182457		2083.58	0.11435722		2613.58	0.04010516		3143.57	0.07159883		3673.57	0.04259747		4203.57	0.15328712
493.8	0.01467409		1023.79	0.00826559		1553.79	0.09167059		2083.78	0.11534222		2613.78	0.04024493		3143.77	0.07153182		3673.77	0.04291888		4203.77	0.15303435
494	0.01395951		1023.99	0.00767183		1553.99	0.0921338		2083.98	0.11560513		2613.98	0.04047836		3143.97	0.07237972		3673.97	0.04336477		4203.97	0.15354323
494.2	0.01347747		1024.19	0.00798535		1554.19	0.09294416		2084.18	0.11630592		2614.18	0.04001436		3144.17	0.07226789		3674.17	0.04400061		4204.17	0.15327307
494.4	0.01459304		1024.39	0.00838102		1554.39	0.09333537		2084.38	0.11587376		2614.38	0.04006698		3144.37	0.07227178		3674.37	0.04465827		4204.37	0.15284287
494.6	0.01442664		1024.59	0.00716899		1554.59	0.09272275		2084.58	0.11502313		2614.58	0.03937007		3144.57	0.07191079		3674.57	0.04482747		4204.57	0.15278962
494.8	0.01533616		1024.79	0.00720724		1554.79	0.09347277		2084.78	0.1142676		2614.78	0.03909641		3144.77	0.07181036		3674.77	0.04490221		4204.77	0.1529244
495	0.01567864		1024.99	0.00667927		1554.99	0.09382618		2084.98	0.1151593		2614.98	0.03891566		3144.97	0.07247917		3674.97	0.04570869		4204.97	0.15244504
495.2	0.01578003		1025.19	0.00655636		1555.19	0.09484998		2085.18	0.11497394		2615.18	0.03774248		3145.17	0.07292963		3675.17	0.0460781		4205.17	0.15237242
495.4	0.01629074		1025.39	0.00644721		1555.39	0.09354641		2085.38	0.11523847		2615.38	0.03710097		3145.37	0.07302994		3675.37	0.0464637		4205.37	0.15322916
495.6	0.01632665		1025.59	0.00653172		1555.59	0.09352246		2085.58	0.11504773		2615.58	0.0366559		3145.57	0.07240791		3675.57	0.04616716		4205.57	0.15429625
495.8	0.01641675		1025.79	0.00564361		1555.79	0.09473786		2085.78	0.11439549		2615.78	0.03581228		3145.77	0.07153697		3675.77	0.04597064		4205.77	0.1542591
496	0.01683701		1025.99	0.00546613		1555.99	0.09488643		2085.98	0.11370667		2615.98	0.03575261		3145.97	0.07120579		3675.97	0.0449156		4205.97	0.15497123
496.2	0.01645908		1026.19	0.00427485		1556.19	0.09428899		2086.18	0.11297035		2616.18	0.03633419		3146.17	0.07161903		3676.17	0.04386001		4206.17	0.15582741
496.4	0.01581517		1026.39	0.00374354		1556.39	0.09398667		2086.38	0.11233		2616.38	0.03674939		3146.37	0.07172983		3676.37	0.04385739		4206.37	0.1557643
496.6	0.01613801		1026.59	0.00366923		1556.59	0.09324363		2086.58	0.11176237		2616.58	0.03630824		3146.57	0.07205351		3676.57	0.04251928		4206.57	0.15554822
496.8	0.01617407		1026.79	0.00438611		1556.79	0.09233736		2086.78	0.11180111		2616.78	0.03696084		3146.77	0.0725601		3676.77	0.04253862		4206.77	0.15553146
497	0.01688855		1026.99	0.00387285		1556.99	0.09278184		2086.98	0.11183816		2616.98	0.03692426		3146.97	0.07301707		3676.97	0.04353915		4206.97	0.15442995
497.2	0.01710596		1027.19	0.0039171		1557.19	0.09267439		2087.18	0.11242644		2617.18	0.03749746		3147.17	0.07320688		3677.17	0.04369084		4207.17	0.15374772
497.4	0.01690735		1027.39	0.00376161		1557.39	0.09196641		2087.38	0.11240721		2617.38	0.0381533		3147.37	0.07315912		3677.37	0.0435414		4207.37	0.15366068
497.6	0.0160919		1027.59	0.00302523		1557.59	0.09127901		2087.58	0.11293245		2617.58	0.03766499		3147.57	0.07335651		3677.57	0.04365724		4207.57	0.15322935
497.8	0.01602485		1027.79	0.00301042		1557.79	0.09132395		2087.78	0.11346139		2617.78	0.03792647		3147.77	0.07307357		3677.77	0.04428899		4207.77	0.15284135
498	0.01454522		1027.99	0.00315491		1557.99	0.09116827		2087.98	0.11388186		2617.98	0.03868893		3147.97	0.07316693		3677.97	0.04421104		4207.97	0.15304649
498.2	0.01436028		1028.19	0.00320157		1558.19	0.0913839		2088.18	0.11383042		2618.18	0.03897261		3148.17	0.0723682		3678.17	0.04409368		4208.17	0.15188936
498.4	0.01454818		1028.39	0.00275302		1558.39	0.09103251		2088.38	0.11310222		2618.38	0.03817068		3148.37	0.07231108		3678.37	0.04461329		4208.37	0.15112487
498.6	0.01464793		1028.59	0.00311433		1558.59	0.09034252		2088.58	0.11323517		2618.58	0.0382787		3148.57	0.07109423		3678.57	0.04416169		4208.57	0.15071231
498.8	0.01431866		1028.79	0.00368056		1558.79	0.0909973		2088.78	0.11331868		2618.78	0.03905983		3148.77	0.07046793		3678.77	0.04512748		4208.77	0.15044219
499	0.01377053		1028.99	0.00373399		1558.99	0.09153053		2088.98	0.11431497		2618.98	0.03965912		3148.97	0.07109566		3678.97	0.04583757		4208.97	0.15125101
499.2	0.01411105		1029.19	0.00457284		1559.19	0.09229352		2089.18	0.11403984		2619.18	0.03900597		3149.17	0.07056394		3679.17	0.04549647		4209.17	0.15156512
499.4	0.0146623		1029.39	0.0049533		1559.39	0.09151744		2089.38	0.11468743		2619.38	0.03903205		3149.37	0.0705112		3679.37	0.04466056		4209.37	0.15259743
499.6	0.01465048		1029.59	0.00542347		1559.59	0.09303196		2089.58	0.11462295		2619.58	0.03850841		3149.57	0.07069132		3679.57	0.04497116		4209.57	0.15373
499.8	0.01486058		1029.79	0.00583879		1559.79	0.09319185		2089.78	0.11453669		2619.78	0.0393408		3149.77	0.0700434		3679.77	0.04388472		4209.77	0.15394307
500	0.01616716		1029.99	0.00610047		1559.99	0.09295302		2089.98	0.11430949		2619.98	0.03888699		3149.97	0.06967519		3679.97	0.04399123		4209.97	0.15413531
500.2	0.01651032		1030.19	0.00656607		1560.19	0.09320608		2090.18	0.11474031		2620.18	0.03883098		3150.17	0.06929678		3680.17	0.04415466		4210.17	0.15409615
500.4	0.01654647		1030.39	0.00714884		1560.39	0.09377947		2090.38	0.11369921		2620.38	0.03838947		3150.37	0.06903474		3680.37	0.04491239		4210.37	0.15351899
500.6	0.01760916		1030.59	0.00747465		1560.59	0.09372046		2090.58	0.11272495		2620.58	0.03895889		3150.57	0.06878038		3680.57	0.04423357		4210.57	0.1531796
500.8	0.01829424		1030.79	0.00741066		1560.79	0.09364895		2090.78	0.11260898		2620.78	0.03971678		3150.77	0.06861537		3680.77	0.04459812		4210.77	0.15254222
501	0.01940007		1030.99	0.00595697		1560.99	0.09404294		2090.98	0.11227098		2620.98	0.03951711		3150.97	0.0688824		3680.97	0.04455623		4210.97	0.1522186
501.2	0.01954154		1031.19	0.00506109		1561.19	0.0940079		2091.18	0.11159025		2621.18	0.03883807		3151.17	0.06881118		3681.17	0.04436063		4211.17	0.15193665
501.4	0.01988669		1031.39	0.00485563		1561.39	0.09378645		2091.38	0.1107852		2621.38	0.0388643		3151.37	0.0691542		3681.37	0.04375529		4211.37	0.15147862
501.6	0.01967207		1031.59	0.00437765		1561.59	0.09413055		2091.58	0.11042682		2621.58	0.039072		3151.57	0.06990788		3681.57	0.04353762		4211.57	0.15159797
501.8	0.01988784		1031.79	0.00384221		1561.79	0.09451559		2091.78	0.10994349		2621.78	0.03911842		3151.77	0.06958648		3681.77	0.04345225		4211.77	0.15109099
502	0.01975164		1031.99	0.00387483		1561.99	0.09386384		2091.98	0.11002187		2621.98	0.03842464		3151.97	0.06892664		3681.97	0.04233104		4211.97	0.15103308
502.2	0.01975266		1032.19	0.00329924		1562.19	0.09480822		2092.18	0.10939284		2622.18	0.03788636		3152.17	0.06913643		3682.17	0.04236999		4212.17	0.15103109
502.4	0.019444		1032.39	0.00271686		1562.39	0.09484006		2092.38	0.10889557		2622.38	0.03714071		3152.37	0.07035171		3682.37	0.04204105		4212.37	0.15062021
502.6	0.01887119		1032.59	0.00321126		1562.59	0.09484598		2092.58	0.10956046		2622.58	0.03802498		3152.57	0.07072303		3682.57	0.04198139		4212.57	0.15052674
502.8	0.01793541		1032.79	0.00315474		1562.79	0.09532348		2092.78	0.1094408		2622.78	0.03846524		3152.77	0.07197385		3682.77	0.04249587		4212.77	0.15123565
503	0.01810324		1032.99	0.00335103		1562.99	0.09521019		2092.98	0.1104688		2622.98	0.03780543		3152.97	0.07291687		3682.97	0.0422169		4212.97	0.15172556
503.2	0.01695688		1033.19	0.00345081		1563.19	0.09485774		2093.18	0.11144065		2623.18	0.03750341		3153.17	0.07413659		3683.17	0.04172661		4213.17	0.15228451
503.4	0.01660608		1033.39	0.00386965		1563.39	0.09490009		2093.38	0.11201654		2623.38	0.03815142		3153.37	0.07418387		3683.37	0.04103523		4213.37	0.15313113
503.6	0.01631854		1033.59	0.00465765		1563.59	0.095142		2093.58	0.11195458		2623.58	0.03890906		3153.57	0.07439879		3683.57	0.0414154		4213.57	0.15330088
503.8	0.01578415		1033.79	0.00442782		1563.79	0.09428673		2093.78	0.11239009		2623.78	0.03953294		3153.77	0.07342184		3683.77	0.04139697		4213.77	0.1531321
504	0.01585295		1033.99	0.00460731		1563.99	0.09440003		2093.98	0.11233637		2623.98	0.03862186		3153.97	0.07192635		3683.97	0.04110659		4213.97	0.15249383
504.2	0.01457965		1034.19	0.00446725		1564.19	0.09458688		2094.18	0.11280361		2624.18	0.03847883		3154.17	0.07225894		3684.17	0.04065424		4214.17	0.15275942
504.4	0.01405882		1034.39	0.0041547		1564.39	0.09458476		2094.38	0.11252459		2624.38	0.03894649		3154.37	0.07195654		3684.37	0.04128137		4214.37	0.15286927
504.6	0.01407754		1034.59	0.00371267		1564.59	0.09400181		2094.58	0.1124519		2624.58	0.03929492		3154.57	0.07092375		3684.57	0.04114168		4214.57	0.15400994
504.8	0.0127759		1034.79	0.00287066		1564.79	0.09391546		2094.78	0.11253378		2624.78	0.03922835		3154.77	0.07030059		3684.77	0.04214992		4214.77	0.15413512
505	0.012415		1034.99	0.00278326		1564.99	0.09458874		2094.98	0.1123929		2624.98	0.03858081		3154.97	0.0709318		3684.97	0.04196201		4214.97	0.15390273
505.2	0.01284136		1035.19	0.00349395		1565.19	0.09486108		2095.18	0.11078083		2625.18	0.03830749		3155.17	0.07028802		3685.17	0.04260199		4215.17	0.15370227
505.4	0.01256387		1035.39	0.00422665		1565.39	0.09432294		2095.38	0.11064418		2625.38	0.03809546		3155.37	0.06985216		3685.37	0.04305675		4215.37	0.15507935
505.6	0.01208052		1035.59	0.00390511		1565.59	0.09434654		2095.58	0.11019648		2625.58	0.03743741		3155.57	0.06872198		3685.57	0.0435838		4215.57	0.15591144
505.8	0.01159707		1035.79	0.0040347		1565.79	0.09351272		2095.78	0.10987433		2625.78	0.0366435		3155.77	0.06765318		3685.77	0.04443265		4215.77	0.15589797
506	0.01211328		1035.99	0.00401949		1565.99	0.09334365		2095.98	0.11068123		2625.98	0.03477972		3155.97	0.06763641		3685.97	0.04471634		4215.97	0.15502002
506.2	0.01225422		1036.19	0.00369103		1566.19	0.09381551		2096.18	0.11101619		2626.18	0.03518371		3156.17	0.06742699		3686.17	0.04501957		4216.17	0.15485078
506.4	0.01291017		1036.39	0.00246363		1566.39	0.09375412		2096.38	0.1115616		2626.38	0.03487896		3156.37	0.06793713		3686.37	0.04427365		4216.37	0.15456788
506.6	0.01357283		1036.59	0.00225734		1566.59	0.09366509		2096.58	0.11192566		2626.58	0.03471839		3156.57	0.06726005		3686.57	0.04448904		4216.57	0.15467497
506.8	0.01360455		1036.79	0.00320698		1566.79	0.0940211		2096.78	0.11249586		2626.78	0.03398145		3156.77	0.06716467		3686.77	0.04427292		4216.77	0.15483799
507	0.01437457		1036.99	0.00368211		1566.99	0.09320281		2096.98	0.11301212		2626.98	0.0336976		3156.97	0.06700602		3686.97	0.04404714		4216.97	0.15383816
507.2	0.01390874		1037.19	0.00481006		1567.19	0.09289104		2097.18	0.11319935		2627.18	0.0337782		3157.17	0.06755279		3687.17	0.04483574		4217.17	0.15368664
507.4	0.01498387		1037.39	0.00524304		1567.39	0.09274095		2097.38	0.1125075		2627.38	0.03376689		3157.37	0.06655825		3687.37	0.04429826		4217.37	0.1528625
507.6	0.01504057		1037.59	0.00494676		1567.59	0.09208833		2097.58	0.11242747		2627.58	0.03457306		3157.57	0.06681784		3687.57	0.04344483		4217.57	0.15262564
507.8	0.01521933		1037.79	0.00380277		1567.79	0.09165688		2097.78	0.11238071		2627.78	0.03482271		3157.77	0.06668782		3687.77	0.04289544		4217.77	0.15312417
508	0.01500567		1037.99	0.00418372		1567.99	0.09165246		2097.98	0.11224163		2627.98	0.03525779		3157.97	0.06660335		3687.97	0.04204631		4217.97	0.15250249
508.2	0.01505992		1038.19	0.00413464		1568.19	0.09177481		2098.18	0.11299414		2628.18	0.03546889		3158.17	0.06744288		3688.17	0.04227002		4218.17	0.15239526
508.4	0.01597124		1038.39	0.00437507		1568.39	0.09121381		2098.38	0.11276838		2628.38	0.03619492		3158.37	0.06691709		3688.37	0.04275376		4218.37	0.15261896
508.6	0.01502977		1038.59	0.00379061		1568.59	0.09110328		2098.58	0.11164977		2628.58	0.03628663		3158.57	0.06747928		3688.57	0.04291144		4218.57	0.15328168
508.8	0.01421063		1038.79	0.00423362		1568.79	0.09193608		2098.78	0.11114533		2628.78	0.03711831		3158.77	0.06807441		3688.77	0.04331157		4218.77	0.15239167
509	0.01490562		1038.99	0.00479601		1568.99	0.09144524		2098.98	0.11102221		2628.98	0.03726993		3158.97	0.06894036		3688.97	0.04291148		4218.97	0.15233422
509.2	0.01478315		1039.19	0.00477039		1569.19	0.09056767		2099.18	0.11049291		2629.18	0.03782785		3159.17	0.06907295		3689.17	0.0429942		4219.17	0.15313135
509.4	0.01402285		1039.39	0.00514357		1569.39	0.08979371		2099.38	0.11042759		2629.38	0.03789983		3159.37	0.06951217		3689.37	0.04304242		4219.37	0.15422182
509.6	0.01273971		1039.59	0.00529615		1569.59	0.08982184		2099.58	0.11035247		2629.58	0.03738098		3159.57	0.0696138		3689.57	0.04354477		4219.57	0.15353501
509.8	0.01287147		1039.79	0.00655923		1569.79	0.08906397		2099.78	0.11049405		2629.78	0.03740652		3159.77	0.06977162		3689.77	0.04352922		4219.77	0.15260813
510	0.01351362		1039.99	0.00633848		1569.99	0.089645		2099.98	0.11169683		2629.98	0.03669205		3159.97	0.07036806		3689.97	0.04297251		4219.97	0.15214636
510.2	0.01366234		1040.19	0.00601319		1570.19	0.08981447		2100.18	0.11246758		2630.18	0.03699161		3160.17	0.06991786		3690.17	0.04262757		4220.17	0.15222294
510.4	0.01456962		1040.39	0.00603575		1570.39	0.09039609		2100.38	0.11370207		2630.38	0.03627503		3160.37	0.07059372		3690.37	0.0419567		4220.37	0.15321286
510.6	0.01447415		1040.59	0.00622171		1570.59	0.09087136		2100.58	0.11401882		2630.58	0.03522387		3160.57	0.07021939		3690.57	0.04301376		4220.57	0.15364999
510.8	0.01406019		1040.79	0.007389		1570.79	0.09173401		2100.78	0.11532334		2630.78	0.03542613		3160.77	0.07017154		3690.77	0.04361757		4220.77	0.15345887
511	0.01470597		1040.99	0.00730603		1570.99	0.09168184		2100.98	0.11563702		2630.98	0.03521001		3160.97	0.07080149		3690.97	0.04445894		4220.97	0.15288241
511.2	0.01413461		1041.19	0.00792662		1571.19	0.09195267		2101.18	0.11585428		2631.18	0.03563013		3161.17	0.0711266		3691.17	0.04503057		4221.17	0.15277237
511.4	0.01450717		1041.39	0.00633027		1571.39	0.09262452		2101.38	0.11595497		2631.38	0.03641465		3161.37	0.07152212		3691.37	0.04433576		4221.37	0.15352618
511.6	0.01369505		1041.59	0.0059108		1571.59	0.09255703		2101.58	0.11559038		2631.58	0.03752866		3161.57	0.07234979		3691.57	0.04334196		4221.57	0.15328178
511.8	0.01410488		1041.79	0.00596381		1571.79	0.09309733		2101.78	0.11559851		2631.78	0.03781857		3161.77	0.07235723		3691.77	0.04325926		4221.77	0.15333788
512	0.01412157		1041.99	0.00618299		1571.99	0.09355228		2101.98	0.11464209		2631.98	0.03752612		3161.97	0.07312509		3691.97	0.04344742		4221.97	0.15240525
512.2	0.01429019		1042.19	0.00537973		1572.19	0.09321666		2102.18	0.11417442		2632.18	0.03723734		3162.17	0.07321321		3692.17	0.04306406		4222.17	0.1523683
512.4	0.01388098		1042.39	0.00514959		1572.39	0.09328296		2102.38	0.11266927		2632.38	0.03753357		3162.37	0.07275766		3692.37	0.04290151		4222.37	0.15279199
512.6	0.01299246		1042.59	0.00412756		1572.59	0.09375832		2102.58	0.11213211		2632.58	0.03777581		3162.57	0.07292336		3692.57	0.04232579		4222.57	0.15290697
512.8	0.0131315		1042.79	0.00346194		1572.79	0.09307438		2102.78	0.11241888		2632.78	0.03830326		3162.77	0.07229379		3692.77	0.04140304		4222.77	0.15304588
513	0.01355705		1042.99	0.00292663		1572.99	0.09245973		2102.98	0.11216429		2632.98	0.03690624		3162.97	0.07245051		3692.97	0.04099289		4222.97	0.15316388
513.2	0.01294884		1043.19	0.00297732		1573.19	0.09251501		2103.18	0.11170804		2633.18	0.03652423		3163.17	0.07232679		3693.17	0.04066687		4223.17	0.15259265
513.4	0.01241471		1043.39	0.00297067		1573.39	0.0920648		2103.38	0.11139477		2633.38	0.03572585		3163.37	0.0721194		3693.37	0.04048404		4223.37	0.1527492
513.6	0.01227677		1043.59	0.00364031		1573.59	0.0919032		2103.58	0.11114196		2633.58	0.03509917		3163.57	0.0716478		3693.57	0.04051602		4223.57	0.15269496
513.8	0.01230083		1043.79	0.00352612		1573.79	0.09120526		2103.78	0.111232		2633.78	0.03415136		3163.77	0.0715828		3693.77	0.03977077		4223.77	0.15267859
514	0.01203937		1043.99	0.00380666		1573.99	0.09133652		2103.98	0.11214735		2633.98	0.03281512		3163.97	0.07172811		3693.97	0.03984566		4223.97	0.1528774
514.2	0.01322812		1044.19	0.00395635		1574.19	0.09101368		2104.18	0.11210012		2634.18	0.03222226		3164.17	0.07091554		3694.17	0.03983982		4224.17	0.15285965
514.4	0.0139479		1044.39	0.0038923		1574.39	0.09121621		2104.38	0.1126299		2634.38	0.03223788		3164.37	0.07124985		3694.37	0.03991972		4224.37	0.15359087
514.6	0.01346486		1044.59	0.00340119		1574.59	0.09185567		2104.58	0.11189717		2634.58	0.03120953		3164.57	0.07075702		3694.57	0.04102668		4224.57	0.15355985
514.8	0.01309449		1044.79	0.00298841		1574.79	0.09205335		2104.78	0.11256515		2634.78	0.03199889		3164.77	0.07062796		3694.77	0.04069281		4224.77	0.15294416
515	0.01352179		1044.99	0.00271491		1574.99	0.09187443		2104.98	0.11229676		2634.98	0.03189896		3164.97	0.07119044		3694.97	0.04041461		4224.97	0.15275653
515.2	0.01346418		1045.19	0.00349045		1575.19	0.09160791		2105.18	0.11210156		2635.18	0.03218249		3165.17	0.07164017		3695.17	0.04060207		4225.17	0.15322519
515.4	0.01395785		1045.39	0.00324552		1575.39	0.09116882		2105.38	0.11158595		2635.38	0.03199769		3165.37	0.07185351		3695.37	0.04081272		4225.37	0.15344023
515.6	0.01354038		1045.59	0.00419454		1575.59	0.09064146		2105.58	0.11076837		2635.58	0.0321599		3165.57	0.07175666		3695.57	0.040287		4225.57	0.15307493
515.8	0.01432867		1045.79	0.00457964		1575.79	0.09102313		2105.78	0.11036803		2635.78	0.03243445		3165.77	0.07119245		3695.77	0.04079997		4225.77	0.15300375
516	0.01434472		1045.99	0.00387951		1575.99	0.09057593		2105.98	0.1099592		2635.98	0.03346354		3165.97	0.07126923		3695.97	0.04123634		4225.97	0.15248738
516.2	0.01383888		1046.19	0.00382647		1576.19	0.09073996		2106.18	0.11034197		2636.18	0.03434375		3166.17	0.07014201		3696.17	0.04111432		4226.17	0.15256832
516.4	0.01403729		1046.39	0.00423662		1576.39	0.09114946		2106.38	0.11043037		2636.38	0.03565299		3166.37	0.0697098		3696.37	0.04081875		4226.37	0.15252474
516.6	0.01352138		1046.59	0.0035818		1576.59	0.0908726		2106.58	0.11149076		2636.58	0.03678948		3166.57	0.06918803		3696.57	0.04146992		4226.57	0.15247508
516.8	0.0130973		1046.79	0.00329821		1576.79	0.09064919		2106.78	0.11203196		2636.78	0.0372552		3166.77	0.06880845		3696.77	0.0418097		4226.77	0.15328371
517	0.01341445		1046.99	0.00365904		1576.99	0.09180749		2106.98	0.11202487		2636.98	0.03721941		3166.97	0.06925971		3696.97	0.04275481		4226.97	0.15321833
517.2	0.01360368		1047.19	0.00409507		1577.19	0.09134451		2107.18	0.11232025		2637.18	0.03820432		3167.17	0.0690928		3697.17	0.04317807		4227.17	0.15294958
517.4	0.01387779		1047.39	0.00337069		1577.39	0.09068031		2107.38	0.11302827		2637.38	0.03939942		3167.37	0.06844409		3697.37	0.04374283		4227.37	0.15458157
517.6	0.01373455		1047.59	0.0041908		1577.59	0.09111532		2107.58	0.11347307		2637.58	0.03936982		3167.57	0.06899392		3697.57	0.04429937		4227.57	0.15397142
517.8	0.01268505		1047.79	0.00412651		1577.79	0.09185313		2107.78	0.11366911		2637.78	0.03934706		3167.77	0.06947476		3697.77	0.04393156		4227.77	0.15350797
518	0.01274069		1047.99	0.00450133		1577.99	0.09201903		2107.98	0.11422395		2637.98	0.03955653		3167.97	0.07031421		3697.97	0.04360582		4227.97	0.15324683
518.2	0.01276776		1048.19	0.0041527		1578.19	0.09224671		2108.18	0.11417865		2638.18	0.04026677		3168.17	0.07035127		3698.17	0.0428303		4228.17	0.15383364
518.4	0.01244308		1048.39	0.0037928		1578.39	0.09269249		2108.38	0.11442633		2638.38	0.04007461		3168.37	0.07042871		3698.37	0.0422789		4228.37	0.15392584
518.6	0.01189822		1048.59	0.00340314		1578.59	0.09303369		2108.58	0.11426371		2638.58	0.03905994		3168.57	0.06998599		3698.57	0.04273499		4228.57	0.15322118
518.8	0.01211591		1048.79	0.00230831		1578.79	0.09215624		2108.78	0.11477586		2638.78	0.03888326		3168.77	0.07033956		3698.77	0.04168743		4228.77	0.15278551
519	0.01287453		1048.99	0.00257693		1578.99	0.09215664		2108.98	0.11468776		2638.98	0.03856382		3168.97	0.07079171		3698.97	0.04156514		4228.97	0.15330709
519.2	0.01350958		1049.19	0.00272325		1579.19	0.09174874		2109.18	0.11481672		2639.18	0.0377689		3169.17	0.07096436		3699.17	0.04223016		4229.17	0.153464
519.4	0.01362946		1049.39	0.00276522		1579.39	0.09190351		2109.38	0.11447912		2639.38	0.03660214		3169.37	0.07087564		3699.37	0.04136415		4229.37	0.1527755
519.6	0.01371396		1049.59	0.00246249		1579.59	0.09135783		2109.58	0.11529727		2639.58	0.03602863		3169.57	0.07103407		3699.57	0.04104972		4229.57	0.15244153
519.8	0.01475859		1049.79	0.00249775		1579.79	0.09155718		2109.78	0.11599747		2639.78	0.03600652		3169.77	0.07072558		3699.77	0.04054092		4229.77	0.15110829
520	0.01499456		1049.99	0.00212489		1579.99	0.09105973		2109.98	0.11645542		2639.98	0.03593573		3169.97	0.07084329		3699.97	0.0396745		4229.97	0.15099444
520.2	0.01567519		1050.19	0.00248935		1580.19	0.09150824		2110.18	0.11658542		2640.18	0.03504772		3170.17	0.07045191		3700.17	0.03980494		4230.17	0.1506916
520.4	0.01618155		1050.39	0.00285968		1580.39	0.09118568		2110.38	0.1164964		2640.38	0.03483902		3170.37	0.06974556		3700.37	0.03987322		4230.37	0.15052537
520.6	0.01565865		1050.59	0.00272534		1580.59	0.09115689		2110.58	0.11635616		2640.58	0.03464989		3170.57	0.06918324		3700.57	0.04099532		4230.57	0.14972968
520.8	0.0160138		1050.79	0.00311049		1580.79	0.09078064		2110.78	0.11593824		2640.78	0.03455388		3170.77	0.06898808		3700.77	0.04074		4230.77	0.14999741
521	0.01623898		1050.99	0.00453312		1580.99	0.09070746		2110.98	0.11463499		2640.98	0.03458395		3170.97	0.06935573		3700.97	0.04079537		4230.97	0.14984943
521.2	0.0156315		1051.19	0.00503313		1581.19	0.09006476		2111.18	0.11388097		2641.18	0.03436585		3171.17	0.06893277		3701.17	0.04097216		4231.17	0.15034417
521.4	0.01418599		1051.39	0.00457469		1581.39	0.09013684		2111.38	0.11437266		2641.38	0.03437298		3171.37	0.06947485		3701.37	0.04062925		4231.37	0.15112258
521.6	0.01240156		1051.59	0.00558658		1581.59	0.0915844		2111.58	0.11361044		2641.58	0.03381762		3171.57	0.07036877		3701.57	0.04047001		4231.57	0.15037546
521.8	0.01139074		1051.79	0.00553808		1581.79	0.09233676		2111.78	0.11277092		2641.78	0.03464005		3171.77	0.06972967		3701.77	0.03997458		4231.77	0.15150646
522	0.01070883		1051.99	0.0059629		1581.99	0.09268394		2111.98	0.11328495		2641.98	0.03405434		3171.97	0.06957116		3701.97	0.04021927		4231.97	0.1518005
522.2	0.00956011		1052.19	0.00633677		1582.19	0.09255967		2112.18	0.11275638		2642.18	0.03390453		3172.17	0.06914616		3702.17	0.03990715		4232.17	0.15270404
522.4	0.00983426		1052.39	0.00660189		1582.39	0.09210232		2112.38	0.11278617		2642.38	0.03351919		3172.37	0.06943188		3702.37	0.04053142		4232.37	0.15289909
522.6	0.00946451		1052.59	0.00629533		1582.59	0.09168174		2112.58	0.11269928		2642.58	0.03344122		3172.57	0.06975185		3702.57	0.04120877		4232.57	0.15263733
522.8	0.00924177		1052.79	0.0058689		1582.79	0.09124678		2112.78	0.11263858		2642.78	0.03352106		3172.77	0.07014857		3702.77	0.0419002		4232.77	0.15296562
523	0.00895052		1052.99	0.00611906		1582.99	0.09096931		2112.98	0.11299842		2642.98	0.03352897		3172.97	0.06949656		3702.97	0.04257627		4232.97	0.15304979
523.2	0.00936855		1053.19	0.00540141		1583.19	0.09028098		2113.18	0.11335211		2643.18	0.03278754		3173.17	0.06963133		3703.17	0.0426003		4233.17	0.1530512
523.4	0.00912028		1053.39	0.00557644		1583.39	0.08964231		2113.38	0.11371038		2643.38	0.03231826		3173.37	0.07032275		3703.37	0.04186992		4233.37	0.15288407
523.6	0.01038815		1053.59	0.00536952		1583.59	0.08901441		2113.58	0.1139701		2643.58	0.03199086		3173.57	0.07087063		3703.57	0.04185073		4233.57	0.15346718
523.8	0.01202815		1053.79	0.00480072		1583.79	0.08921477		2113.78	0.11367296		2643.78	0.03185424		3173.77	0.07106823		3703.77	0.0421809		4233.77	0.15364919
524	0.01230339		1053.99	0.00402747		1583.99	0.08856863		2113.98	0.11289103		2643.98	0.03145009		3173.97	0.07117005		3703.97	0.04199044		4233.97	0.15401102
524.2	0.01352527		1054.19	0.0040522		1584.19	0.08851764		2114.18	0.11248448		2644.18	0.03209472		3174.17	0.07048391		3704.17	0.04307565		4234.17	0.15332887
524.4	0.01393655		1054.39	0.00353175		1584.39	0.08836888		2114.38	0.11318596		2644.38	0.03239848		3174.37	0.07019531		3704.37	0.0427033		4234.37	0.15342328
524.6	0.0139471		1054.59	0.00270774		1584.59	0.08836654		2114.58	0.11364712		2644.58	0.03322535		3174.57	0.07092758		3704.57	0.04280865		4234.57	0.15232367
524.8	0.01405653		1054.79	0.0026238		1584.79	0.08873851		2114.78	0.11344448		2644.78	0.03359863		3174.77	0.07075215		3704.77	0.04212952		4234.77	0.15229532
525	0.014292		1054.99	0.00204552		1584.99	0.08933171		2114.98	0.11268707		2644.98	0.03422875		3174.97	0.07079551		3704.97	0.04181268		4234.97	0.15192818
525.2	0.0138198		1055.19	0.00159724		1585.19	0.09097624		2115.18	0.11285676		2645.18	0.0341598		3175.17	0.07078245		3705.17	0.04130107		4235.17	0.15231801
525.4	0.01370472		1055.39	0.00000251		1585.39	0.09185717		2115.38	0.11252769		2645.38	0.03366963		3175.37	0.07107341		3705.37	0.04085643		4235.37	0.15243354
525.6	0.01393962		1055.59	-0.00035797		1585.59	0.09334672		2115.58	0.11121749		2645.58	0.03322898		3175.57	0.07019338		3705.57	0.04088921		4235.57	0.15234723
525.8	0.0146011		1055.79	-0.00055249		1585.79	0.09364391		2115.78	0.111916		2645.78	0.03388261		3175.77	0.0699162		3705.77	0.04084365		4235.77	0.15209673
526	0.01360543		1055.99	-0.00056345		1585.99	0.09456641		2115.98	0.11230443		2645.98	0.03389348		3175.97	0.07014042		3705.97	0.04086388		4235.97	0.15175824
526.2	0.01295611		1056.19	-0.00096165		1586.19	0.09446805		2116.18	0.11152522		2646.18	0.03368891		3176.17	0.0704592		3706.17	0.04061432		4236.17	0.15149742
526.4	0.01318214		1056.39	-0.00090966		1586.39	0.09452372		2116.38	0.11228173		2646.38	0.03355982		3176.37	0.07054191		3706.37	0.04064972		4236.37	0.15073675
526.6	0.01244199		1056.59	-0.00227411		1586.59	0.09490395		2116.58	0.11184463		2646.58	0.03407866		3176.57	0.06959241		3706.57	0.04065101		4236.57	0.15059589
526.8	0.01148698		1056.79	-0.00264544		1586.79	0.09450641		2116.78	0.11161436		2646.78	0.03372471		3176.77	0.06849033		3706.77	0.0407032		4236.77	0.15070512
527	0.01109838		1056.99	-0.00277065		1586.99	0.09349135		2116.98	0.11103456		2646.98	0.03503165		3176.97	0.06844163		3706.97	0.04014302		4236.97	0.15073371
527.2	0.010696		1057.19	-0.00280827		1587.19	0.09310086		2117.18	0.11127456		2647.18	0.03527408		3177.17	0.06940805		3707.17	0.03952792		4237.17	0.15057272
527.4	0.01004455		1057.39	-0.00168843		1587.39	0.09258046		2117.38	0.11063731		2647.38	0.03557861		3177.37	0.07004473		3707.37	0.03891643		4237.37	0.15082651
527.6	0.01011923		1057.59	-0.00170432		1587.59	0.09238317		2117.58	0.11025298		2647.58	0.03462662		3177.57	0.07039489		3707.57	0.03989127		4237.57	0.151776
527.8	0.00958223		1057.79	-0.00140247		1587.79	0.09146532		2117.78	0.11000514		2647.78	0.03514112		3177.77	0.07073352		3707.77	0.04094408		4237.77	0.15109444
528	0.00908407		1057.99	-0.00083931		1587.99	0.09108442		2117.98	0.1100371		2647.98	0.03568818		3177.97	0.07035586		3707.97	0.0410123		4237.97	0.15103018
528.2	0.0092155		1058.19	-0.00014104		1588.19	0.09084934		2118.18	0.11042094		2648.18	0.03709159		3178.17	0.07044289		3708.17	0.04125154		4238.17	0.15120396
528.4	0.00930126		1058.39	0.00059175		1588.39	0.09102089		2118.38	0.11096697		2648.38	0.03739484		3178.37	0.07087886		3708.37	0.04033658		4238.37	0.15082432
528.6	0.00996773		1058.59	0.0015357		1588.59	0.09145314		2118.58	0.11104917		2648.58	0.03778161		3178.57	0.07115342		3708.57	0.04077622		4238.57	0.1506795
528.8	0.01018741		1058.79	0.00235522		1588.79	0.09211297		2118.78	0.11070937		2648.78	0.03774329		3178.77	0.07081101		3708.77	0.04050417		4238.77	0.15033111
529	0.01057564		1058.99	0.00285616		1588.99	0.0920877		2118.98	0.11046719		2648.98	0.03847568		3178.97	0.07111232		3708.97	0.04040138		4238.97	0.15055721
529.2	0.0105576		1059.19	0.00348573		1589.19	0.09240426		2119.18	0.10996748		2649.18	0.0379188		3179.17	0.07148118		3709.17	0.04039365		4239.17	0.15087027
529.4	0.01138882		1059.39	0.0026409		1589.39	0.09164483		2119.38	0.10975812		2649.38	0.03698209		3179.37	0.07108515		3709.37	0.04133007		4239.37	0.15048156
529.6	0.01128733		1059.59	0.00294461		1589.59	0.09126058		2119.58	0.1100985		2649.58	0.03705449		3179.57	0.07037837		3709.57	0.04109827		4239.57	0.15022801
529.8	0.01143481		1059.79	0.00350617		1589.79	0.09077093		2119.78	0.11090659		2649.78	0.03830659		3179.77	0.0702656		3709.77	0.04163102		4239.77	0.14932533
530	0.01036372		1059.99	0.00361527		1589.99	0.09048297		2119.98	0.11041168		2649.98	0.03712611		3179.97	0.06925636		3709.97	0.04202931		4239.97	0.14875812
530.2	0.01038553		1060.19	0.0036914		1590.19	0.09075821		2120.18	0.11072764		2650.18	0.03667595		3180.17	0.06881462		3710.17	0.04247744		4240.17	0.14785351
530.4	0.01069196		1060.39	0.00353378		1590.39	0.09014357		2120.38	0.11176845		2650.38	0.03626708		3180.37	0.0682905		3710.37	0.04149499		4240.37	0.14794381
530.6	0.01043313		1060.59	0.00270479		1590.59	0.08965025		2120.58	0.11105211		2650.58	0.03654999		3180.57	0.06771448		3710.57	0.04167542		4240.57	0.14803474
530.8	0.00970762		1060.79	0.00224145		1590.79	0.089319		2120.78	0.11055724		2650.78	0.03569756		3180.77	0.06753912		3710.77	0.04131104		4240.77	0.14893883
531	0.00966282		1060.99	0.00144709		1590.99	0.08963581		2120.98	0.11028669		2650.98	0.03677882		3180.97	0.0688713		3710.97	0.04137213		4240.97	0.14854357
531.2	0.00883773		1061.19	0.00165753		1591.19	0.08917341		2121.18	0.11128049		2651.18	0.03627391		3181.17	0.06904258		3711.17	0.04090745		4241.17	0.1486974
531.4	0.00875084		1061.39	0.00131967		1591.39	0.08904658		2121.38	0.11115716		2651.38	0.03536819		3181.37	0.06906749		3711.37	0.04023537		4241.37	0.14900102
531.6	0.00814422		1061.59	0.00102434		1591.59	0.08828625		2121.58	0.11165414		2651.58	0.0342259		3181.57	0.06928065		3711.57	0.0414844		4241.57	0.14889087
531.8	0.0077503		1061.79	0.00097365		1591.79	0.08842474		2121.78	0.11101765		2651.78	0.03426166		3181.77	0.0691347		3711.77	0.04130447		4241.77	0.14920953
532	0.00724152		1061.99	0.00145584		1591.99	0.08906166		2121.98	0.11100443		2651.98	0.03379093		3181.97	0.06886929		3711.97	0.04105435		4241.97	0.14956903
532.2	0.00725987		1062.19	0.00140836		1592.19	0.08942266		2122.18	0.11099881		2652.18	0.03349253		3182.17	0.06933593		3712.17	0.04044744		4242.17	0.14934294
532.4	0.00741299		1062.39	0.00210657		1592.39	0.08981056		2122.38	0.1111137		2652.38	0.03226384		3182.37	0.06917355		3712.37	0.04012568		4242.37	0.14907752
532.6	0.00804517		1062.59	0.00222251		1592.59	0.09118137		2122.58	0.11183729		2652.58	0.03138389		3182.57	0.06943719		3712.57	0.04123091		4242.57	0.1501137
532.8	0.00795105		1062.79	0.00177923		1592.79	0.09158779		2122.78	0.11200629		2652.78	0.03109465		3182.77	0.06985714		3712.77	0.04125681		4242.77	0.15023069
533	0.00786258		1062.99	0.0011095		1592.99	0.09214313		2122.98	0.11255056		2652.98	0.0311646		3182.97	0.0699392		3712.97	0.04129141		4242.97	0.15105754
533.2	0.00806806		1063.19	0.00049691		1593.19	0.09214505		2123.18	0.11178915		2653.18	0.0303655		3183.17	0.06991169		3713.17	0.04136487		4243.17	0.15079649
533.4	0.00854527		1063.39	0.00061131		1593.39	0.0924801		2123.38	0.11228005		2653.38	0.03058422		3183.37	0.07005649		3713.37	0.04173845		4243.37	0.15053064
533.6	0.00798439		1063.59	0.00100084		1593.59	0.09178781		2123.58	0.11209746		2653.58	0.03056074		3183.57	0.06975796		3713.57	0.04157145		4243.57	0.15122278
533.8	0.0081234		1063.79	0.00200967		1593.79	0.0910209		2123.78	0.11228421		2653.78	0.03085653		3183.77	0.06920623		3713.77	0.04206473		4243.77	0.15071449
534	0.00782847		1063.99	0.0028609		1593.99	0.09106225		2123.98	0.11260303		2653.98	0.03028488		3183.97	0.06891979		3713.97	0.0418694		4243.97	0.15097999
534.2	0.0083803		1064.19	0.00325503		1594.19	0.09121357		2124.18	0.11250969		2654.18	0.03139567		3184.17	0.0697816		3714.17	0.04165097		4244.17	0.15155658
534.4	0.0090276		1064.39	0.00283117		1594.39	0.09079261		2124.38	0.11216417		2654.38	0.03117282		3184.37	0.06961853		3714.37	0.04113496		4244.37	0.15203269
534.6	0.00901752		1064.59	0.00291497		1594.59	0.09053077		2124.58	0.1115233		2654.58	0.03197679		3184.57	0.07044471		3714.57	0.04129536		4244.57	0.15181031
534.8	0.00949131		1064.79	0.00174461		1594.79	0.09027977		2124.78	0.11201715		2654.78	0.03235781		3184.77	0.07094636		3714.77	0.04116779		4244.77	0.15332722
535	0.01009281		1064.99	0.00190683		1594.99	0.08994513		2124.98	0.11181848		2654.98	0.03351814		3184.97	0.07163486		3714.97	0.04061841		4244.97	0.15293083
535.2	0.01036073		1065.19	0.00211564		1595.19	0.08927253		2125.18	0.11167006		2655.18	0.03367238		3185.17	0.07136511		3715.17	0.03984731		4245.17	0.15303564
535.4	0.01033934		1065.39	0.00147593		1595.39	0.08963241		2125.38	0.11150389		2655.38	0.03299091		3185.37	0.07136559		3715.37	0.03893974		4245.37	0.15207439
535.6	0.0096712		1065.59	0.00158675		1595.59	0.08933106		2125.58	0.11117308		2655.58	0.03304991		3185.57	0.07144474		3715.57	0.03937033		4245.57	0.15181768
535.8	0.00849395		1065.79	0.00114172		1595.79	0.09006774		2125.78	0.11081863		2655.78	0.03284427		3185.77	0.07083362		3715.77	0.03920787		4245.77	0.15189192
536	0.00798944		1065.99	0.00154774		1595.99	0.0906673		2125.98	0.11099661		2655.98	0.03251978		3185.97	0.06996291		3715.97	0.0388125		4245.97	0.15054889
536.2	0.00841675		1066.19	0.00069231		1596.19	0.090852		2126.18	0.11118529		2656.18	0.0318968		3186.17	0.0699801		3716.17	0.03873149		4246.17	0.15027489
536.4	0.00797674		1066.39	0.00085188		1596.39	0.09137989		2126.38	0.11173452		2656.38	0.03068628		3186.37	0.06903941		3716.37	0.0387782		4246.37	0.15047644
536.6	0.00858409		1066.59	-0.00074536		1596.59	0.09173623		2126.58	0.11155408		2656.58	0.03092655		3186.57	0.06911847		3716.57	0.03969372		4246.57	0.15081868
536.8	0.00885398		1066.79	-0.00130987		1596.79	0.09176707		2126.78	0.11132382		2656.78	0.03071192		3186.77	0.06834343		3716.77	0.03961506		4246.77	0.15051884
537	0.00887064		1066.99	-0.00223733		1596.99	0.09231781		2126.98	0.1114672		2656.98	0.03062774		3186.97	0.06785521		3716.97	0.04009623		4246.97	0.15061571
537.2	0.00828431		1067.19	-0.00298156		1597.19	0.09214246		2127.18	0.10996477		2657.18	0.03066873		3187.17	0.06773666		3717.17	0.04050598		4247.17	0.14960453
537.4	0.00819836		1067.39	-0.00407778		1597.39	0.09205436		2127.38	0.10994594		2657.38	0.03055603		3187.37	0.0679838		3717.37	0.0406433		4247.37	0.14908851
537.6	0.0081504		1067.59	-0.00426488		1597.59	0.09155127		2127.58	0.10918586		2657.58	0.03067573		3187.57	0.06723735		3717.57	0.04068482		4247.57	0.14927813
537.8	0.00782314		1067.79	-0.00411599		1597.79	0.0909104		2127.78	0.10923207		2657.78	0.03068834		3187.77	0.06759925		3717.77	0.04076589		4247.77	0.14920535
538	0.00789651		1067.99	-0.00449013		1597.99	0.09076646		2127.98	0.10885775		2657.98	0.03054426		3187.97	0.0686556		3717.97	0.04024572		4247.97	0.14925343
538.2	0.00818189		1068.19	-0.00517705		1598.19	0.09040357		2128.18	0.10807188		2658.18	0.0310554		3188.17	0.0693366		3718.17	0.04090844		4248.17	0.14861643
538.4	0.00898989		1068.39	-0.00484609		1598.39	0.09025429		2128.38	0.10799927		2658.38	0.03129517		3188.37	0.06907393		3718.37	0.040929		4248.37	0.14837438
538.6	0.00880639		1068.59	-0.00393565		1598.59	0.08926228		2128.58	0.10790609		2658.58	0.03218475		3188.57	0.06986464		3718.57	0.04074868		4248.57	0.14824582
538.8	0.00940809		1068.79	-0.00416446		1598.79	0.0886905		2128.78	0.10833278		2658.78	0.03286575		3188.77	0.06955245		3718.77	0.04053473		4248.77	0.14837389
539	0.00956179		1068.99	-0.00248759		1598.99	0.08927723		2128.98	0.10733284		2658.98	0.03326675		3188.97	0.06999473		3718.97	0.04036804		4248.97	0.14767263
539.2	0.00922018		1069.19	-0.00173208		1599.19	0.08977133		2129.18	0.10659109		2659.18	0.03317138		3189.17	0.06960104		3719.17	0.03981177		4249.17	0.14738084
539.4	0.00854304		1069.39	-0.00109153		1599.39	0.08979254		2129.38	0.10740269		2659.38	0.03308892		3189.37	0.07020275		3719.37	0.03955921		4249.37	0.14752555
539.6	0.00836012		1069.59	0.0003038		1599.59	0.09001775		2129.58	0.10739767		2659.58	0.03341188		3189.57	0.06967917		3719.57	0.04000411		4249.57	0.14817946
539.8	0.00815717		1069.79	0.00093563		1599.79	0.09099631		2129.78	0.10843998		2659.78	0.03350744		3189.77	0.06937222		3719.77	0.03973838		4249.77	0.14917045
540	0.00872873		1069.99	0.00150027		1599.99	0.09109313		2129.98	0.10902404		2659.98	0.03381296		3189.97	0.06921008		3719.97	0.03988665		4249.97	0.14888839
540.2	0.00954949		1070.19	0.001856		1600.19	0.09079938		2130.18	0.11024619		2660.18	0.03281724		3190.17	0.06959543		3720.17	0.03971984		4250.17	0.14951364
540.4	0.01008145		1070.39	0.00325541		1600.39	0.09067131		2130.38	0.11148965		2660.38	0.03286856		3190.37	0.06889698		3720.37	0.04063257		4250.37	0.14963145
540.6	0.01095044		1070.59	0.0029654		1600.59	0.09063199		2130.58	0.11140054		2660.58	0.03374644		3190.57	0.06882216		3720.57	0.04060115		4250.57	0.14976595
540.8	0.01143085		1070.79	0.0032967		1600.79	0.09107164		2130.78	0.11200705		2660.78	0.0341052		3190.77	0.06882118		3720.77	0.04115942		4250.77	0.14962289
541	0.01116308		1070.99	0.002703		1600.99	0.09084093		2130.98	0.11157992		2660.98	0.03421456		3190.97	0.0695149		3720.97	0.04154891		4250.97	0.14983207
541.2	0.01089836		1071.19	0.0024081		1601.19	0.09019981		2131.18	0.11072175		2661.18	0.03427591		3191.17	0.06978357		3721.17	0.04056249		4251.17	0.14956596
541.4	0.0111636		1071.39	0.00159028		1601.39	0.08963655		2131.38	0.11040371		2661.38	0.03407412		3191.37	0.0700145		3721.37	0.04048624		4251.37	0.14953362
541.6	0.01043897		1071.59	0.00248527		1601.59	0.0889224		2131.58	0.10993559		2661.58	0.03450508		3191.57	0.0705085		3721.57	0.04141329		4251.57	0.15011154
541.8	0.00982055		1071.79	0.00275274		1601.79	0.08783075		2131.78	0.10987619		2661.78	0.03372404		3191.77	0.07128229		3721.77	0.04182269		4251.77	0.15053234
542	0.0094423		1071.99	0.00285203		1601.99	0.08742844		2131.98	0.10942299		2661.98	0.03432785		3191.97	0.07090397		3721.97	0.04154399		4251.97	0.1507588
542.2	0.00908871		1072.19	0.00312917		1602.19	0.08746344		2132.18	0.10862198		2662.18	0.0338616		3192.17	0.07020469		3722.17	0.04190153		4252.17	0.15160786
542.4	0.00931205		1072.39	0.00360169		1602.39	0.08749643		2132.38	0.1078401		2662.38	0.03295601		3192.37	0.06949846		3722.37	0.04165707		4252.37	0.15239361
542.6	0.00807586		1072.59	0.0039688		1602.59	0.08803316		2132.58	0.10709916		2662.58	0.0333382		3192.57	0.06938852		3722.57	0.04163321		4252.57	0.15284952
542.8	0.00739483		1072.79	0.00353276		1602.79	0.08836349		2132.78	0.10726631		2662.78	0.0334214		3192.77	0.06913633		3722.77	0.04147044		4252.77	0.15316575
543	0.00699801		1072.99	0.00369144		1602.99	0.08906692		2132.98	0.1070202		2662.98	0.0334123		3192.97	0.0694475		3722.97	0.04194143		4252.97	0.15321572
543.2	0.00627589		1073.19	0.0032558		1603.19	0.08983519		2133.18	0.10627875		2663.18	0.03249549		3193.17	0.06865708		3723.17	0.04156252		4253.17	0.1539106
543.4	0.00629959		1073.39	0.00219848		1603.39	0.09056881		2133.38	0.10758072		2663.38	0.03247666		3193.37	0.06915651		3723.37	0.04246644		4253.37	0.15396136
543.6	0.00618472		1073.59	0.0019986		1603.59	0.09215969		2133.58	0.10838975		2663.58	0.03258423		3193.57	0.06926348		3723.57	0.04322255		4253.57	0.15480709
543.8	0.00630973		1073.79	0.00138792		1603.79	0.09300082		2133.78	0.10935302		2663.78	0.03243643		3193.77	0.06933741		3723.77	0.0428695		4253.77	0.15499892
544	0.00678931		1073.99	0.00084332		1603.99	0.09345529		2133.98	0.10918485		2663.98	0.03212655		3193.97	0.0692305		3723.97	0.04343303		4253.97	0.15404735
544.2	0.00801842		1074.19	0.00083079		1604.19	0.09386225		2134.18	0.10955673		2664.18	0.03141873		3194.17	0.06917271		3724.17	0.0423579		4254.17	0.15426265
544.4	0.00924894		1074.39	0.00043577		1604.39	0.09368015		2134.38	0.10988735		2664.38	0.032143		3194.37	0.06879786		3724.37	0.04296807		4254.37	0.15327373
544.6	0.00976655		1074.59	-0.00087812		1604.59	0.09399607		2134.58	0.11004028		2664.58	0.03272326		3194.57	0.0688684		3724.57	0.04181319		4254.57	0.15213712
544.8	0.00999343		1074.79	-0.0016063		1604.79	0.09364871		2134.78	0.11103448		2664.78	0.0324599		3194.77	0.06892011		3724.77	0.04216519		4254.77	0.15143188
545	0.01005726		1074.99	-0.00199098		1604.99	0.09288696		2134.98	0.1116892		2664.98	0.03195817		3194.97	0.06902076		3724.97	0.04196733		4254.97	0.15212422
545.2	0.00996999		1075.19	-0.00154741		1605.19	0.09238543		2135.18	0.11257447		2665.18	0.03171591		3195.17	0.06903575		3725.17	0.04059837		4255.17	0.152077
545.4	0.00895605		1075.39	-0.00207939		1605.39	0.09188265		2135.38	0.11351719		2665.38	0.03194533		3195.37	0.06845059		3725.37	0.04143395		4255.37	0.15087442
545.6	0.0084742		1075.59	-0.00158325		1605.59	0.09092615		2135.58	0.11393316		2665.58	0.03211095		3195.57	0.068848		3725.57	0.04116904		4255.57	0.15080217
545.8	0.00871728		1075.79	-0.00156588		1605.79	0.09037648		2135.78	0.11470659		2665.78	0.03145293		3195.77	0.06840882		3725.77	0.04062865		4255.77	0.15058938
546	0.00811987		1075.99	-0.00183011		1605.99	0.09016234		2135.98	0.11494138		2665.98	0.03121586		3195.97	0.06866882		3725.97	0.04010322		4255.97	0.15043544
546.2	0.00698225		1076.19	-0.00223645		1606.19	0.09016236		2136.18	0.11498505		2666.18	0.03104522		3196.17	0.06857998		3726.17	0.03978411		4256.17	0.15000577
546.4	0.00685912		1076.39	-0.00223598		1606.39	0.09030155		2136.38	0.11546323		2666.38	0.03091715		3196.37	0.06898682		3726.37	0.03921362		4256.37	0.14906123
546.6	0.00597051		1076.59	-0.00228146		1606.59	0.09015314		2136.58	0.11554734		2666.58	0.0313566		3196.57	0.06939758		3726.57	0.03891677		4256.57	0.14892474
546.8	0.00564271		1076.79	-0.00279339		1606.79	0.08933885		2136.78	0.11555076		2666.78	0.03113799		3196.77	0.06965788		3726.77	0.03881827		4256.77	0.14903583
547	0.00557944		1076.99	-0.00244141		1606.99	0.08915669		2136.98	0.11485751		2666.98	0.03100024		3196.97	0.07013077		3726.97	0.03876064		4256.97	0.14886771
547.2	0.00558379		1077.19	-0.00206499		1607.19	0.08938371		2137.18	0.1137937		2667.18	0.03027476		3197.17	0.06969436		3727.17	0.03824765		4257.17	0.14944632
547.4	0.00520889		1077.39	-0.0015375		1607.39	0.08918616		2137.38	0.11426126		2667.38	0.03111682		3197.37	0.07038714		3727.37	0.03854854		4257.37	0.14890912
547.6	0.00458419		1077.59	-0.00071701		1607.59	0.08906569		2137.58	0.11277155		2667.58	0.03120813		3197.57	0.07091318		3727.57	0.03886289		4257.57	0.15012026
547.8	0.00523731		1077.79	-0.00003655		1607.79	0.08866207		2137.78	0.11141991		2667.78	0.03104842		3197.77	0.07013414		3727.77	0.03852634		4257.77	0.14939562
548	0.00599894		1077.99	0.00034175		1607.99	0.08917901		2137.98	0.10921187		2667.98	0.03047553		3197.97	0.07039351		3727.97	0.03876929		4257.97	0.14948694
548.2	0.00706628		1078.19	0.00030545		1608.19	0.08820124		2138.18	0.10893257		2668.18	0.0303491		3198.17	0.07019294		3728.17	0.03787187		4258.17	0.14930927
548.4	0.00797959		1078.39	0.00009078		1608.39	0.08744991		2138.38	0.10823882		2668.38	0.03121211		3198.37	0.06972784		3728.37	0.03801146		4258.37	0.14926077
548.6	0.00781049		1078.59	-0.00043369		1608.59	0.0880775		2138.58	0.10741252		2668.58	0.03155705		3198.57	0.06878774		3728.57	0.03807955		4258.57	0.14992717
548.8	0.00839265		1078.79	0.00027113		1608.79	0.08836106		2138.78	0.10781101		2668.78	0.03122546		3198.77	0.06808396		3728.77	0.03825668		4258.77	0.15009517
549	0.008111		1078.99	0.00012578		1608.99	0.08931299		2138.98	0.10834818		2668.98	0.03094808		3198.97	0.06823414		3728.97	0.03884336		4258.97	0.15134408
549.2	0.00842513		1079.19	0.00047571		1609.19	0.08965365		2139.18	0.10839283		2669.18	0.03108948		3199.17	0.06806519		3729.17	0.03766979		4259.17	0.15075622
549.4	0.00853024		1079.39	0.00031465		1609.39	0.08931483		2139.38	0.10886		2669.38	0.03211054		3199.37	0.06790227		3729.37	0.03843734		4259.37	0.14986141
549.6	0.00850572		1079.59	0.00013602		1609.59	0.08864426		2139.58	0.10810003		2669.58	0.03213023		3199.57	0.06862509		3729.57	0.03831905		4259.57	0.15000768
549.8	0.00872391		1079.79	-0.00024634		1609.79	0.08869763		2139.78	0.10857253		2669.78	0.03230237		3199.77	0.06878604		3729.77	0.03869921		4259.77	0.14933188
550	0.00817588		1079.99	-0.00069078		1609.99	0.08936296		2139.98	0.10842667		2669.98	0.03301618		3199.97	0.06889254		3729.97	0.03805322		4259.97	0.14820009
550.2	0.00785349		1080.19	-0.00010424		1610.19	0.08980275		2140.18	0.10862102		2670.18	0.03345432		3200.17	0.06840111		3730.17	0.03792448		4260.17	0.14765556
550.4	0.00842619		1080.39	0.0004963		1610.39	0.0899597		2140.38	0.10883363		2670.38	0.03373365		3200.37	0.06816729		3730.37	0.03764061		4260.37	0.1474158
550.6	0.00791652		1080.59	0.00022087		1610.59	0.08966522		2140.58	0.10927097		2670.58	0.03336218		3200.57	0.06793704		3730.57	0.03778028		4260.57	0.14781849
550.8	0.00734564		1080.79	0.00026696		1610.79	0.0894307		2140.78	0.10863042		2670.78	0.0336801		3200.77	0.06740143		3730.77	0.03729708		4260.77	0.14786262
551	0.00677805		1080.99	0.0002122		1610.99	0.08873019		2140.98	0.10849128		2670.98	0.03357733		3200.97	0.06777894		3730.97	0.03688564		4260.97	0.14791019
551.2	0.00628599		1081.19	-0.00009754		1611.19	0.08903335		2141.18	0.10947037		2671.18	0.03364089		3201.17	0.06745391		3731.17	0.03759948		4261.17	0.14797982
551.4	0.00534965		1081.39	0.00017575		1611.39	0.08844361		2141.38	0.10963661		2671.38	0.03362298		3201.37	0.06724025		3731.37	0.03843512		4261.37	0.14774307
551.6	0.00476955		1081.59	0.00014506		1611.59	0.08794248		2141.58	0.10928989		2671.58	0.03329723		3201.57	0.06747178		3731.57	0.03939024		4261.57	0.14786738
551.8	0.00479007		1081.79	0.00038237		1611.79	0.08835677		2141.78	0.10961727		2671.78	0.0326145		3201.77	0.06775891		3731.77	0.03944507		4261.77	0.14752151
552	0.00431605		1081.99	0.00084235		1611.99	0.08827574		2141.98	0.10904943		2671.98	0.03217981		3201.97	0.06770289		3731.97	0.03927465		4261.97	0.14839623
552.2	0.00478963		1082.19	0.00070786		1612.19	0.08743449		2142.18	0.10968793		2672.18	0.03294218		3202.17	0.06741856		3732.17	0.03917919		4262.17	0.14867525
552.4	0.00525083		1082.39	0.00050647		1612.39	0.08699079		2142.38	0.10896171		2672.38	0.03402862		3202.37	0.06741151		3732.37	0.03933485		4262.37	0.14995709
552.6	0.00439911		1082.59	0.00101401		1612.59	0.08678916		2142.58	0.108244		2672.58	0.0339286		3202.57	0.06733079		3732.57	0.04054357		4262.57	0.15084415
552.8	0.00398551		1082.79	0.00163708		1612.79	0.08691123		2142.78	0.10953808		2672.78	0.03413438		3202.77	0.06731999		3732.77	0.04015462		4262.77	0.15136294
553	0.00287084		1082.99	0.00092907		1612.99	0.0875622		2142.98	0.11028594		2672.98	0.03395736		3202.97	0.0674176		3732.97	0.04065855		4262.97	0.15196365
553.2	0.00335759		1083.19	0.00075476		1613.19	0.08662066		2143.18	0.10990761		2673.18	0.03416063		3203.17	0.06866499		3733.17	0.04016685		4263.17	0.15217967
553.4	0.00381209		1083.39	0.00079316		1613.39	0.08646985		2143.38	0.10946861		2673.38	0.03458508		3203.37	0.06945696		3733.37	0.04091513		4263.37	0.15236776
553.6	0.00405127		1083.59	-0.00027185		1613.59	0.08688394		2143.58	0.10918507		2673.58	0.03432995		3203.57	0.07018663		3733.57	0.04090526		4263.57	0.15246859
553.8	0.00457804		1083.79	0.00001495		1613.79	0.08761341		2143.78	0.10973392		2673.78	0.03429385		3203.77	0.06962594		3733.77	0.04042767		4263.77	0.15239139
554	0.00421182		1083.99	-0.0001299		1613.99	0.08901002		2143.98	0.11022852		2673.98	0.03447241		3203.97	0.06929298		3733.97	0.03922333		4263.97	0.15185476
554.2	0.00493165		1084.19	0.00078431		1614.19	0.08972768		2144.18	0.10998885		2674.18	0.03401541		3204.17	0.06866388		3734.17	0.0389682		4264.17	0.15178044
554.4	0.00470696		1084.39	0.00060139		1614.39	0.09005717		2144.38	0.11093011		2674.38	0.03434651		3204.37	0.06841204		3734.37	0.0386416		4264.37	0.15096865
554.6	0.00486361		1084.59	-0.00023197		1614.59	0.08948771		2144.58	0.1119369		2674.58	0.03326707		3204.57	0.06849613		3734.57	0.03863261		4264.57	0.15073528
554.8	0.00464673		1084.79	-0.00076264		1614.79	0.0898301		2144.78	0.11137946		2674.78	0.03321182		3204.77	0.06782272		3734.77	0.03866489		4264.77	0.15030317
555	0.00552459		1084.99	-0.00151658		1614.99	0.08897755		2144.98	0.11195404		2674.98	0.03240212		3204.97	0.06832156		3734.97	0.03874104		4264.97	0.14949724
555.2	0.00568677		1085.19	-0.0017518		1615.19	0.08904316		2145.18	0.1136333		2675.18	0.03205126		3205.17	0.06709222		3735.17	0.03997202		4265.17	0.14956892
555.4	0.00591321		1085.39	-0.00123781		1615.39	0.08936518		2145.38	0.1126399		2675.38	0.0319254		3205.37	0.06664846		3735.37	0.03966016		4265.37	0.1488962
555.6	0.00599328		1085.59	-0.00020411		1615.59	0.08904626		2145.58	0.11244691		2675.58	0.03146828		3205.57	0.06686871		3735.57	0.03964536		4265.57	0.14839732
555.8	0.00651398		1085.79	0.00029446		1615.79	0.0885373		2145.78	0.11245692		2675.78	0.0308901		3205.77	0.06642488		3735.77	0.03901555		4265.77	0.14827292
556	0.0074407		1085.99	0.00095596		1615.99	0.08762258		2145.98	0.11143906		2675.98	0.03109328		3205.97	0.06572927		3735.97	0.03884467		4265.97	0.1479523
556.2	0.00779856		1086.19	0.00058924		1616.19	0.08727454		2146.18	0.11131021		2676.18	0.03091926		3206.17	0.06536431		3736.17	0.03893049		4266.17	0.14805359
556.4	0.00750208		1086.39	0.00052139		1616.39	0.08643719		2146.38	0.11061426		2676.38	0.03092488		3206.37	0.06530064		3736.37	0.03870287		4266.37	0.14863532
556.6	0.00637584		1086.59	0.00105797		1616.59	0.08620445		2146.58	0.10954216		2676.58	0.03076183		3206.57	0.06516862		3736.57	0.03910198		4266.57	0.1492227
556.8	0.0062533		1086.79	0.00061778		1616.79	0.08564378		2146.78	0.11024477		2676.78	0.03035206		3206.77	0.06488768		3736.77	0.03794994		4266.77	0.14876379
557	0.00680288		1086.99	0.00029016		1616.99	0.08641671		2146.98	0.10980781		2676.98	0.0303996		3206.97	0.0650152		3736.97	0.03859104		4266.97	0.14783268
557.2	0.00751489		1087.19	0.00041001		1617.19	0.08628631		2147.18	0.1090784		2677.18	0.03006577		3207.17	0.06596301		3737.17	0.03889353		4267.17	0.14800155
557.4	0.00723122		1087.39	-0.00066193		1617.39	0.08710316		2147.38	0.10955288		2677.38	0.03053596		3207.37	0.06661086		3737.37	0.03877415		4267.37	0.14796149
557.6	0.00670045		1087.59	-0.00144844		1617.59	0.08861673		2147.58	0.11033854		2677.58	0.03035216		3207.57	0.06713461		3737.57	0.03796701		4267.57	0.14806205
557.8	0.00610892		1087.79	-0.00148933		1617.79	0.08938493		2147.78	0.11063926		2677.78	0.03039823		3207.77	0.06707633		3737.77	0.0373018		4267.77	0.14822827
558	0.00593732		1087.99	-0.00226683		1617.99	0.09045812		2147.98	0.11081032		2677.98	0.03067845		3207.97	0.0676441		3737.97	0.03678601		4267.97	0.14802123
558.2	0.00609313		1088.19	-0.0023349		1618.19	0.09102973		2148.18	0.11068611		2678.18	0.03043336		3208.17	0.06763295		3738.17	0.03675694		4268.17	0.14803098
558.4	0.00545889		1088.39	-0.00338052		1618.39	0.09111529		2148.38	0.11171028		2678.38	0.03053925		3208.37	0.06828369		3738.37	0.0369244		4268.37	0.14823023
558.6	0.00561463		1088.59	-0.00417583		1618.59	0.09109618		2148.58	0.11180058		2678.58	0.03044055		3208.57	0.06849388		3738.57	0.03727802		4268.57	0.14849532
558.8	0.00510061		1088.79	-0.00471865		1618.79	0.09162816		2148.78	0.11182238		2678.78	0.0305934		3208.77	0.06831653		3738.77	0.03740536		4268.77	0.14865804
559	0.00537793		1088.99	-0.00519863		1618.99	0.09140203		2148.98	0.11229924		2678.98	0.03058221		3208.97	0.06866556		3738.97	0.03740211		4268.97	0.14853719
559.2	0.00493786		1089.19	-0.00548069		1619.19	0.09173848		2149.18	0.11269582		2679.18	0.03083244		3209.17	0.06804828		3739.17	0.03806555		4269.17	0.14924545
559.4	0.00491847		1089.39	-0.00549447		1619.39	0.09223995		2149.38	0.11187665		2679.38	0.0310676		3209.37	0.06824361		3739.37	0.03786538		4269.37	0.14881061
559.6	0.00496861		1089.59	-0.0054439		1619.59	0.09123933		2149.58	0.11217429		2679.58	0.03049513		3209.57	0.06764791		3739.57	0.03808568		4269.57	0.14882987
559.8	0.00538793		1089.79	-0.0061117		1619.79	0.0908981		2149.78	0.1123978		2679.78	0.0304063		3209.77	0.06727658		3739.77	0.03812959		4269.77	0.14852044
