# Supplementary material for: Functional development of a V3/glycan-specific broadly neutralizing antibody isolated from a case of HIV superinfection
Source: eLife journal article supplement (doi:10.7554/elife.68110), 2021-07-15
Supplement: fig4-data2 [file C3.xls]

Vers 3.43 Data Simulation
Conc1	1.25E-07	1.25E-07	1.25E-07	1.25E-07	1.25E-07	1.25E-07	1.25E-07	1.25E-07
Start1	200	729.99	1259.99	1789.99	2319.98	2849.98	3379.97	3909.97
Stop1	559.8	1089.79	1619.79	2149.78	2679.78	3209.77	3739.77	4269.77
Time1	Data1	Sim1	Time2	Data2	Sim2	Time3	Data3	Sim3	Time4	Data4	Sim4	Time5	Data5	Sim5	Time6	Data6	Sim6	Time7	Data7	Sim7	Time8	Data8	Sim8
200	0.00058095		729.99	0.00800306		1259.99	0.00610265		1789.99	0.00771256		2319.98	-0.00275363		2849.98	-0.00105669		3379.97	0.00264945		3909.97	0.00116744
200.2	0.00068078		730.19	0.00834356		1260.19	0.00522652		1790.19	0.00806135		2320.18	-0.00262022		2850.18	-0.00194761		3380.17	0.003816		3910.17	0.00024913
200.4	0.00055282		730.39	0.00926881		1260.39	0.00472302		1790.39	0.0080687		2320.38	-0.0033929		2850.38	-0.00234767		3380.37	0.00470941		3910.37	-0.0001198
200.6	0.00028962		730.59	0.0101073		1260.59	0.00400267		1790.59	0.00782334		2320.58	-0.00390532		2850.58	-0.00282705		3380.57	0.00590281		3910.57	-0.00037911
200.8	0.00104728		730.79	0.01081754		1260.79	0.0038761		1790.79	0.00811926		2320.78	-0.00394234		2850.78	-0.00339315		3380.77	0.00724668		3910.77	-0.00076504
201	0.00104308		730.99	0.0112868		1260.99	0.00390808		1790.99	0.00802133		2320.98	-0.00487086		2850.98	-0.00305696		3380.97	0.00776951		3910.97	-0.00077048
201.2	0.00084746		731.19	0.01187751		1261.19	0.00390921		1791.19	0.00846603		2321.18	-0.00521254		2851.18	-0.00241569		3381.17	0.0078282		3911.17	-0.00175091
201.4	0.00097348		731.39	0.01201902		1261.39	0.00330018		1791.39	0.0088542		2321.38	-0.00652363		2851.38	-0.0024884		3381.37	0.00803518		3911.37	-0.00157145
201.6	0.00130968		731.59	0.0121963		1261.59	0.00356085		1791.59	0.00892595		2321.58	-0.00755377		2851.58	-0.00145993		3381.57	0.00740116		3911.57	-0.00179967
201.8	0.00208624		731.79	0.01217475		1261.79	0.00337161		1791.79	0.00814897		2321.78	-0.00839243		2851.78	-0.00084596		3381.77	0.0073441		3911.77	-0.00212523
202	0.00201989		731.99	0.01184726		1261.99	0.00428048		1791.99	0.00763205		2321.98	-0.00925231		2851.98	0.00038826		3381.97	0.00674047		3911.97	-0.00181737
202.2	0.00208987		732.19	0.01097691		1262.19	0.0048686		1792.19	0.00737861		2322.18	-0.00924354		2852.18	0.00163308		3382.17	0.00542576		3912.17	-0.00134348
202.4	0.00199455		732.39	0.01043041		1262.39	0.00431183		1792.39	0.00717181		2322.38	-0.01009363		2852.38	0.00296141		3382.37	0.00392641		3912.37	-0.00135033
202.6	0.00218421		732.59	0.00962104		1262.59	0.00361244		1792.59	0.00700518		2322.58	-0.01060881		2852.58	0.00378421		3382.57	0.00282959		3912.57	-0.00176079
202.8	0.00108838		732.79	0.00903071		1262.79	0.00319057		1792.79	0.00630473		2322.78	-0.01058069		2852.78	0.0042803		3382.77	0.00193675		3912.77	-0.00181294
203	0.00158752		732.99	0.00826186		1262.99	0.00340307		1792.99	0.00579036		2322.98	-0.0106148		2852.98	0.00513225		3382.97	0.00091728		3912.97	-0.00114016
203.2	0.00141182		733.19	0.00746202		1263.19	0.00405799		1793.19	0.00540612		2323.18	-0.01127997		2853.18	0.00528336		3383.17	0.00171978		3913.17	-0.00090475
203.4	0.00078393		733.39	0.00750986		1263.39	0.00410141		1793.39	0.00515333		2323.38	-0.01073185		2853.38	0.00505944		3383.37	0.00206809		3913.37	-0.00062178
203.6	0.0011566		733.59	0.00758029		1263.59	0.00431572		1793.59	0.00472663		2323.58	-0.01071316		2853.58	0.00406827		3383.57	0.00130862		3913.57	-0.00068723
203.8	0.00069005		733.79	0.00680419		1263.79	0.00449454		1793.79	0.00502652		2323.78	-0.01087782		2853.78	0.00337832		3383.77	0.00167041		3913.77	-0.00054419
204	0.0003916		733.99	0.00709929		1263.99	0.00558173		1793.99	0.00553507		2323.98	-0.01012044		2853.98	0.00297733		3383.97	0.00178965		3913.97	-0.00062692
204.2	0.00003409		734.19	0.00690496		1264.19	0.00528041		1794.19	0.00524269		2324.18	-0.01023084		2854.18	0.00292951		3384.17	0.00264311		3914.17	-0.0012158
204.4	-0.00021863		734.39	0.00705722		1264.39	0.00592069		1794.39	0.00518883		2324.38	-0.01096965		2854.38	0.00286735		3384.37	0.00290171		3914.37	-0.00024018
204.6	-0.00003246		734.59	0.00662057		1264.59	0.00664352		1794.59	0.00498609		2324.58	-0.01051109		2854.58	0.00258921		3384.57	0.00318747		3914.57	0.00003507
204.8	0.00055515		734.79	0.0070904		1264.79	0.0072579		1794.79	0.00537286		2324.78	-0.01018836		2854.78	0.0024995		3384.77	0.00294739		3914.77	0.00001687
205	-0.0002895		734.99	0.00696038		1264.99	0.00685122		1794.99	0.00563167		2324.98	-0.01158313		2854.98	0.00298397		3384.97	0.00248168		3914.97	-0.00022992
205.2	-0.00038101		735.19	0.00727192		1265.19	0.00630666		1795.19	0.00471402		2325.18	-0.01170764		2855.18	0.00291922		3385.17	0.00217089		3915.17	-0.0001014
205.4	-0.00023433		735.39	0.00710774		1265.39	0.00543186		1795.39	0.00456292		2325.38	-0.01267974		2855.38	0.00273306		3385.37	0.00202606		3915.37	0.00069924
205.6	0.00009237		735.59	0.00703624		1265.59	0.0056591		1795.59	0.00391712		2325.58	-0.01274695		2855.58	0.00314383		3385.57	0.00124384		3915.57	0.0006995
205.8	0.00049711		735.79	0.00688639		1265.79	0.00485549		1795.79	0.00289794		2325.78	-0.01249578		2855.78	0.00231375		3385.77	0.00184787		3915.77	0.00026171
206	-0.00030784		735.99	0.00630867		1265.99	0.0051643		1795.99	0.00314402		2325.98	-0.01243637		2855.98	0.0022005		3385.97	0.00063228		3915.97	0.00022217
206.2	0.00032254		736.19	0.00583392		1266.19	0.00406806		1796.19	0.00328642		2326.18	-0.01240254		2856.18	0.00223961		3386.17	0.00019535		3916.17	-0.00016333
206.4	0.00094676		736.39	0.00597292		1266.39	0.00409051		1796.39	0.00347202		2326.38	-0.01300528		2856.38	0.00218417		3386.37	-0.00054705		3916.37	-0.00079668
206.6	0.00019644		736.59	0.00463207		1266.59	0.00394423		1796.59	0.00258711		2326.58	-0.01320247		2856.58	0.00220978		3386.57	-0.00067196		3916.57	-0.00031435
206.8	-0.00067737		736.79	0.00374099		1266.79	0.00422105		1796.79	0.00260469		2326.78	-0.01346048		2856.78	0.00209445		3386.77	-0.00001055		3916.77	0.00037253
207	-0.00024757		736.99	0.00284609		1266.99	0.00399459		1796.99	0.0032416		2326.98	-0.01333938		2856.98	0.00217802		3386.97	0.00042393		3916.97	0.00003882
207.2	-0.0007599		737.19	0.00359091		1267.19	0.00451744		1797.19	0.00304591		2327.18	-0.01335498		2857.18	0.0017831		3387.17	0.00110887		3917.17	0.00022962
207.4	-0.000458		737.39	0.00421215		1267.39	0.00474071		1797.39	0.0032909		2327.38	-0.01314949		2857.38	0.00174223		3387.37	0.00136223		3917.37	0.00003032
207.6	0.00035497		737.59	0.00372018		1267.59	0.00535366		1797.59	0.0040464		2327.58	-0.01402001		2857.58	0.00128393		3387.57	0.00196046		3917.57	0.00028932
207.8	-0.00046784		737.79	0.0036112		1267.79	0.00518198		1797.79	0.00452367		2327.78	-0.01346118		2857.78	0.0014202		3387.77	0.00223553		3917.77	-0.00013421
208	-0.00056383		737.99	0.00430308		1267.99	0.00546811		1797.99	0.00494113		2327.98	-0.0128046		2857.98	0.00156489		3387.97	0.00170929		3917.97	-0.00014972
208.2	-0.00042798		738.19	0.00487769		1268.19	0.00516712		1798.19	0.00474862		2328.18	-0.01285805		2858.18	0.00181316		3388.17	0.00205739		3918.17	-0.00005675
208.4	0.000138		738.39	0.00516045		1268.39	0.00560405		1798.39	0.00566263		2328.38	-0.01281624		2858.38	0.00179918		3388.37	0.00156273		3918.37	0.00017805
208.6	0.00049774		738.59	0.00483838		1268.59	0.00596757		1798.59	0.00536697		2328.58	-0.01258121		2858.58	0.00284762		3388.57	0.00165596		3918.57	-0.0002632
208.8	0.00081252		738.79	0.00572919		1268.79	0.0044976		1798.79	0.00504894		2328.78	-0.01238502		2858.78	0.00333693		3388.77	0.00174534		3918.77	-0.00068659
209	0.00043827		738.99	0.00549797		1268.99	0.00373916		1798.99	0.00438016		2328.98	-0.01217688		2858.98	0.00399029		3388.97	0.00129465		3918.97	-0.00132049
209.2	0.00110087		739.19	0.00601931		1269.19	0.00363409		1799.19	0.00376689		2329.18	-0.01078046		2859.18	0.0049624		3389.17	0.00115587		3919.17	-0.00061866
209.4	0.00038251		739.39	0.00619675		1269.39	0.00348948		1799.39	0.00543614		2329.38	-0.01042298		2859.38	0.00577549		3389.37	0.0005563		3919.37	-0.00152351
209.6	0.00062477		739.59	0.00589595		1269.59	0.00361029		1799.59	0.00561478		2329.58	-0.00977282		2859.58	0.00506091		3389.57	-0.00015386		3919.57	-0.00229875
209.8	0.00051653		739.79	0.00617961		1269.79	0.00334395		1799.79	0.00589058		2329.78	-0.00899443		2859.78	0.00467919		3389.77	-0.00059602		3919.77	-0.00308728
210	0.0005294		739.99	0.00592773		1269.99	0.00404173		1799.99	0.00662408		2329.98	-0.00935485		2859.98	0.00451236		3389.97	-0.00160539		3919.97	-0.00246368
210.2	0.00053275		740.19	0.00660996		1270.19	0.0034505		1800.19	0.00674292		2330.18	-0.00976856		2860.18	0.00411885		3390.17	-0.00176522		3920.17	-0.00192347
210.4	0.00010542		740.39	0.00723396		1270.39	0.00418137		1800.39	0.00650475		2330.38	-0.00977522		2860.38	0.00335121		3390.37	-0.00251969		3920.37	-0.0015028
210.6	-0.00042298		740.59	0.00701315		1270.59	0.00440751		1800.59	0.00586342		2330.58	-0.00876195		2860.58	0.00393175		3390.57	-0.00284275		3920.57	-0.00083388
210.8	-0.00096256		740.79	0.00745851		1270.79	0.00502749		1800.79	0.00606623		2330.78	-0.00949001		2860.78	0.00325113		3390.77	-0.00293902		3920.77	0.00018845
211	-0.00010348		740.99	0.00792151		1270.99	0.00490343		1800.99	0.00621169		2330.98	-0.00962111		2860.98	0.00313713		3390.97	-0.00386882		3920.97	0.00089186
211.2	-0.00000905		741.19	0.00792264		1271.19	0.00504861		1801.19	0.00528821		2331.18	-0.01008833		2861.18	0.00274211		3391.17	-0.00436557		3921.17	0.0021326
211.4	0.00034463		741.39	0.00775785		1271.39	0.00600097		1801.39	0.00593523		2331.38	-0.01025805		2861.38	0.00294511		3391.37	-0.00497001		3921.37	0.00230986
211.6	-0.00019177		741.59	0.00706655		1271.59	0.00577774		1801.59	0.00574279		2331.58	-0.01134679		2861.58	0.00243626		3391.57	-0.0054276		3921.57	0.00343052
211.8	-0.00088318		741.79	0.00680061		1271.79	0.00534202		1801.79	0.00537778		2331.78	-0.01100016		2861.78	0.00281715		3391.77	-0.00603338		3921.77	0.00358616
212	-0.0006059		741.99	0.00772074		1271.99	0.00570095		1801.99	0.00472301		2331.98	-0.01237783		2861.98	0.00251533		3391.97	-0.00599655		3921.97	0.00413499
212.2	-0.0006393		742.19	0.00748628		1272.19	0.00639853		1802.19	0.00438598		2332.18	-0.01246919		2862.18	0.00287017		3392.17	-0.00530961		3922.17	0.00437202
212.4	-0.00013798		742.39	0.00697248		1272.39	0.00609595		1802.39	0.00438539		2332.38	-0.01353163		2862.38	0.00319744		3392.37	-0.00533457		3922.37	0.00383451
212.6	0.00023601		742.59	0.00574424		1272.59	0.00514477		1802.59	0.00370826		2332.58	-0.01448635		2862.58	0.00417162		3392.57	-0.00439276		3922.57	0.00286484
212.8	0.00011116		742.79	0.00624798		1272.79	0.00495444		1802.79	0.00347721		2332.78	-0.01444134		2862.78	0.00380965		3392.77	-0.00402834		3922.77	0.00239894
213	-0.00003593		742.99	0.00621378		1272.99	0.00568683		1802.99	0.00361809		2332.98	-0.01502816		2862.98	0.00434383		3392.97	-0.00398453		3922.97	0.00202865
213.2	0.00059483		743.19	0.00595247		1273.19	0.00622857		1803.19	0.00464757		2333.18	-0.01537814		2863.18	0.00479096		3393.17	-0.00340003		3923.17	0.00183495
213.4	0.00042542		743.39	0.0053197		1273.39	0.00577946		1803.39	0.00518404		2333.38	-0.01644607		2863.38	0.00510361		3393.37	-0.00315334		3923.37	0.00108593
213.6	0.00091759		743.59	0.00543462		1273.59	0.00542926		1803.59	0.00535054		2333.58	-0.01540765		2863.58	0.00478087		3393.57	-0.00251347		3923.57	0.00044394
213.8	0.00105695		743.79	0.00555885		1273.79	0.00588864		1803.79	0.004993		2333.78	-0.01528071		2863.78	0.0053181		3393.77	-0.00208614		3923.77	0.00046798
214	0.00141217		743.99	0.00599595		1273.99	0.00646467		1803.99	0.00527326		2333.98	-0.01532588		2863.98	0.00516194		3393.97	-0.00091308		3923.97	0.00118253
214.2	0.00144411		744.19	0.0065102		1274.19	0.00538947		1804.19	0.00507767		2334.18	-0.01409999		2864.18	0.00516763		3394.17	-0.00015343		3924.17	0.00130516
214.4	0.00186999		744.39	0.00633391		1274.39	0.00513066		1804.39	0.00535996		2334.38	-0.01372256		2864.38	0.00503665		3394.37	0.00031645		3924.37	0.00130809
214.6	0.0019293		744.59	0.00640614		1274.59	0.00505246		1804.59	0.00668928		2334.58	-0.01264874		2864.58	0.00539361		3394.57	0.00056332		3924.57	0.00173219
214.8	0.00177847		744.79	0.00624155		1274.79	0.00427705		1804.79	0.00684518		2334.78	-0.01249174		2864.78	0.00439416		3394.77	0.00133679		3924.77	0.00210631
215	0.00185583		744.99	0.00555853		1274.99	0.00412348		1804.99	0.0069895		2334.98	-0.01161192		2864.98	0.00451069		3394.97	0.00080458		3924.97	0.00233258
215.2	0.00274739		745.19	0.0054422		1275.19	0.00440413		1805.19	0.00766958		2335.18	-0.01080021		2865.18	0.00473552		3395.17	0.000302		3925.17	0.0021766
215.4	0.00269474		745.39	0.00569398		1275.39	0.00433412		1805.39	0.00858461		2335.38	-0.01001001		2865.38	0.00493554		3395.37	0.00002607		3925.37	0.00113444
215.6	0.00302953		745.59	0.0056159		1275.59	0.00408009		1805.59	0.00896908		2335.58	-0.00924325		2865.58	0.00418531		3395.57	-0.00007781		3925.57	0.00139633
215.8	0.00345797		745.79	0.00556635		1275.79	0.00357166		1805.79	0.00936659		2335.78	-0.00779918		2865.78	0.00413203		3395.77	0.00012918		3925.77	0.0009732
216	0.00333843		745.99	0.00535123		1275.99	0.00450901		1805.99	0.00908455		2335.98	-0.00745878		2865.98	0.0033219		3395.97	-0.00018705		3925.97	0.00067767
216.2	0.00312746		746.19	0.00479063		1276.19	0.00541652		1806.19	0.01034259		2336.18	-0.00796974		2866.18	0.00339315		3396.17	-0.00059749		3926.17	-0.00006776
216.4	0.00299439		746.39	0.00515546		1276.39	0.00541914		1806.39	0.01204084		2336.38	-0.00871292		2866.38	0.00364485		3396.37	-0.00159807		3926.37	-0.00010258
216.6	0.00292918		746.59	0.00516296		1276.59	0.00550497		1806.59	0.01243983		2336.58	-0.00942579		2866.58	0.00370559		3396.57	-0.00146073		3926.57	0.00020163
216.8	0.0022553		746.79	0.00545314		1276.79	0.0076229		1806.79	0.01301561		2336.78	-0.01019164		2866.78	0.00355623		3396.77	-0.00243312		3926.77	0.00141842
217	0.00296824		746.99	0.00549669		1276.99	0.00811518		1806.99	0.01427301		2336.98	-0.01140515		2866.98	0.00355734		3396.97	-0.00272346		3926.97	0.00212967
217.2	0.00297845		747.19	0.00574026		1277.19	0.00855482		1807.19	0.01463126		2337.18	-0.01223477		2867.18	0.00294389		3397.17	-0.0029087		3927.17	0.00266551
217.4	0.00369735		747.39	0.00606422		1277.39	0.00807241		1807.39	0.01402149		2337.38	-0.01260918		2867.38	0.00369601		3397.37	-0.00214839		3927.37	0.00358328
217.6	0.00306375		747.59	0.00684839		1277.59	0.00904917		1807.59	0.01368504		2337.58	-0.01232158		2867.58	0.00380028		3397.57	-0.00137389		3927.57	0.00334466
217.8	0.0026773		747.79	0.00653218		1277.79	0.00965343		1807.79	0.01296578		2337.78	-0.01347826		2867.78	0.00443862		3397.77	-0.00106571		3927.77	0.00403566
218	0.00265578		747.99	0.00698375		1277.99	0.0107248		1807.99	0.01328098		2337.98	-0.01393137		2867.98	0.0050752		3397.97	0.00054256		3927.97	0.00513171
218.2	0.00212842		748.19	0.00633123		1278.19	0.01028471		1808.19	0.01248042		2338.18	-0.01420168		2868.18	0.00604031		3398.17	0.0016336		3928.17	0.0057068
218.4	0.00144312		748.39	0.00649652		1278.39	0.01017775		1808.39	0.01231159		2338.38	-0.01507099		2868.38	0.00635247		3398.37	0.00245658		3928.37	0.00658389
218.6	0.00132925		748.59	0.00636769		1278.59	0.01025458		1808.59	0.01170407		2338.58	-0.01484604		2868.58	0.0074233		3398.57	0.00292321		3928.57	0.00672555
218.8	0.00132387		748.79	0.00567944		1278.79	0.01015261		1808.79	0.00995795		2338.78	-0.01395326		2868.78	0.00739908		3398.77	0.00282443		3928.77	0.00668597
219	0.00182591		748.99	0.00621097		1278.99	0.01023014		1808.99	0.00888845		2338.98	-0.01337864		2868.98	0.00781863		3398.97	0.00203127		3928.97	0.0072441
219.2	0.00247873		749.19	0.00694035		1279.19	0.00995971		1809.19	0.00875602		2339.18	-0.01258336		2869.18	0.00734129		3399.17	0.00186728		3929.17	0.00664532
219.4	0.00238115		749.39	0.00717749		1279.39	0.00979909		1809.39	0.00771863		2339.38	-0.01160763		2869.38	0.00635169		3399.37	0.0026392		3929.37	0.00591951
219.6	0.00317241		749.59	0.00745923		1279.59	0.00943982		1809.59	0.00765774		2339.58	-0.01100946		2869.58	0.00548948		3399.57	0.00233109		3929.57	0.00573084
219.8	0.00216349		749.79	0.00683199		1279.79	0.00887647		1809.79	0.00694377		2339.78	-0.01038039		2869.78	0.00554219		3399.77	0.0022969		3929.77	0.00467195
220	0.00214871		749.99	0.00685409		1279.99	0.00968129		1809.99	0.00746126		2339.98	-0.01029591		2869.98	0.00499202		3399.97	0.00157691		3929.97	0.00457148
220.2	0.00158853		750.19	0.00758471		1280.19	0.00975476		1810.19	0.00893354		2340.18	-0.01061217		2870.18	0.0051175		3400.17	0.00070106		3930.17	0.0042078
220.4	0.00046019		750.39	0.00798022		1280.39	0.00924485		1810.39	0.00983475		2340.38	-0.00936148		2870.38	0.00507597		3400.37	0.0001904		3930.37	0.00530843
220.6	0.00129741		750.59	0.00806492		1280.59	0.00842728		1810.59	0.00976121		2340.58	-0.00925455		2870.58	0.0049183		3400.57	0.00040545		3930.57	0.00456952
220.8	0.00081167		750.79	0.00747543		1280.79	0.00867263		1810.79	0.01026228		2340.78	-0.00921656		2870.78	0.00479547		3400.77	-0.00040107		3930.77	0.00441506
221	0.00135123		750.99	0.00756919		1280.99	0.00874877		1810.99	0.0110926		2340.98	-0.00903509		2870.98	0.00400096		3400.97	0.00013082		3930.97	0.00405986
221.2	0.00072815		751.19	0.00801941		1281.19	0.00895123		1811.19	0.01070738		2341.18	-0.0091807		2871.18	0.0036162		3401.17	-0.00009992		3931.17	0.00406678
221.4	0.00095465		751.39	0.00813651		1281.39	0.00836792		1811.39	0.01038912		2341.38	-0.00921062		2871.38	0.00395126		3401.37	0.00067347		3931.37	0.00356303
221.6	-0.00049389		751.59	0.00863182		1281.59	0.00913143		1811.59	0.01175314		2341.58	-0.00953911		2871.58	0.00402184		3401.57	0.00127278		3931.57	0.00350883
221.8	-0.00122305		751.79	0.00850733		1281.79	0.00939123		1811.79	0.01200198		2341.78	-0.01012167		2871.78	0.00478826		3401.77	0.00099389		3931.77	0.00392665
222	-0.00146027		751.99	0.00866281		1281.99	0.01061112		1811.99	0.01167313		2341.98	-0.01094481		2871.98	0.0050513		3401.97	0.00219849		3931.97	0.0045328
222.2	-0.00186168		752.19	0.00827789		1282.19	0.00982674		1812.19	0.01093758		2342.18	-0.01126161		2872.18	0.00616024		3402.17	0.00286872		3932.17	0.00516561
222.4	-0.00168301		752.39	0.00769268		1282.39	0.00952838		1812.39	0.01097334		2342.38	-0.01149454		2872.38	0.00592619		3402.37	0.00355803		3932.37	0.0065367
222.6	-0.00113823		752.59	0.00694899		1282.59	0.00926902		1812.59	0.01096009		2342.58	-0.01099077		2872.58	0.0066818		3402.57	0.00354572		3932.57	0.00706123
222.8	-0.00093716		752.79	0.00730249		1282.79	0.00994611		1812.79	0.01132641		2342.78	-0.01049063		2872.78	0.00612672		3402.77	0.00396652		3932.77	0.00762647
223	-0.0002791		752.99	0.00761232		1282.99	0.01043655		1812.99	0.01089876		2342.98	-0.0112049		2872.98	0.00546766		3402.97	0.00396642		3932.97	0.00755992
223.2	-0.00016028		753.19	0.00755587		1283.19	0.01098533		1813.19	0.01103426		2343.18	-0.01077055		2873.18	0.00474534		3403.17	0.00441726		3933.17	0.00664193
223.4	0.00019232		753.39	0.0071676		1283.39	0.01101701		1813.39	0.01085052		2343.38	-0.01048774		2873.38	0.00519842		3403.37	0.0051824		3933.37	0.00635152
223.6	0.00079778		753.59	0.00725973		1283.59	0.0101415		1813.59	0.01136261		2343.58	-0.01008148		2873.58	0.00540104		3403.57	0.00460252		3933.57	0.00647632
223.8	-0.00049173		753.79	0.00678496		1283.79	0.01036882		1813.79	0.01142432		2343.78	-0.00937511		2873.78	0.00522898		3403.77	0.00478133		3933.77	0.00649821
224	0.00022181		753.99	0.00678017		1283.99	0.01016192		1813.99	0.01217284		2343.98	-0.00913988		2873.98	0.00583937		3403.97	0.00416544		3933.97	0.00705255
224.2	-0.0002503		754.19	0.00675337		1284.19	0.01004558		1814.19	0.01176497		2344.18	-0.00864384		2874.18	0.00599991		3404.17	0.00367067		3934.17	0.00718933
224.4	-0.00003323		754.39	0.00699062		1284.39	0.01006692		1814.39	0.01133894		2344.38	-0.00824826		2874.38	0.00617766		3404.37	0.00388281		3934.37	0.00788156
224.6	0.0016981		754.59	0.00688437		1284.59	0.00975948		1814.59	0.01073559		2344.58	-0.00821372		2874.58	0.00592309		3404.57	0.00375213		3934.57	0.00734558
224.8	0.00097631		754.79	0.00610742		1284.79	0.00996954		1814.79	0.01023695		2344.78	-0.00827289		2874.78	0.0057349		3404.77	0.00215953		3934.77	0.00785487
225	0.00174978		754.99	0.00683532		1284.99	0.01090958		1814.99	0.01091658		2344.98	-0.00867198		2874.98	0.00589819		3404.97	0.00228937		3934.97	0.00757446
225.2	0.00155451		755.19	0.00846961		1285.19	0.01099088		1815.19	0.01143088		2345.18	-0.00898696		2875.18	0.00554043		3405.17	0.00184213		3935.17	0.00743545
225.4	0.00124797		755.39	0.00919671		1285.39	0.01086648		1815.39	0.0126037		2345.38	-0.00966077		2875.38	0.00591325		3405.37	0.00199358		3935.37	0.00770911
225.6	0.00079512		755.59	0.00998995		1285.59	0.01172449		1815.59	0.01313054		2345.58	-0.01081388		2875.58	0.00666264		3405.57	0.00182375		3935.57	0.00895612
225.8	0.00072506		755.79	0.01035129		1285.79	0.01181012		1815.79	0.01303587		2345.78	-0.01139657		2875.78	0.0065787		3405.77	0.00162941		3935.77	0.0095612
226	0.00092307		755.99	0.0105843		1285.99	0.01147942		1815.99	0.01254746		2345.98	-0.01179451		2875.98	0.00716327		3405.97	0.00246405		3935.97	0.01130265
226.2	0.001122		756.19	0.01012241		1286.19	0.01070846		1816.19	0.01339662		2346.18	-0.01139903		2876.18	0.00842168		3406.17	0.00271863		3936.17	0.01215518
226.4	0.00212573		756.39	0.00918981		1286.39	0.01061528		1816.39	0.01369667		2346.38	-0.01067368		2876.38	0.00740051		3406.37	0.00383954		3936.37	0.01346521
226.6	0.00162842		756.59	0.00924043		1286.59	0.01055147		1816.59	0.01340266		2346.58	-0.01061871		2876.58	0.00816543		3406.57	0.00381284		3936.57	0.01352788
226.8	0.00172944		756.79	0.00970279		1286.79	0.01178455		1816.79	0.01333673		2346.78	-0.01008308		2876.78	0.00753543		3406.77	0.00402196		3936.77	0.01298282
227	0.00145104		756.99	0.00871812		1286.99	0.01179044		1816.99	0.01273104		2346.98	-0.00965044		2876.98	0.00694352		3406.97	0.00326164		3936.97	0.01218484
227.2	0.001402		757.19	0.00878576		1287.19	0.01104143		1817.19	0.01335071		2347.18	-0.00908911		2877.18	0.00707549		3407.17	0.00330244		3937.17	0.01189361
227.4	0.00106012		757.39	0.00781637		1287.39	0.01083417		1817.39	0.01334189		2347.38	-0.00856512		2877.38	0.007678		3407.37	0.00356167		3937.37	0.01182989
227.6	0.00101299		757.59	0.00769903		1287.59	0.0111532		1817.59	0.01291973		2347.58	-0.00780486		2877.58	0.00762411		3407.57	0.00350046		3937.57	0.01173353
227.8	-0.00019704		757.79	0.00747783		1287.79	0.01159186		1817.79	0.01247731		2347.78	-0.00748945		2877.78	0.00776876		3407.77	0.00256823		3937.77	0.01176832
228	0.00007962		757.99	0.00738323		1287.99	0.01182492		1817.99	0.01227022		2347.98	-0.00668663		2877.98	0.00845774		3407.97	0.00183347		3937.97	0.01165064
228.2	0.00014227		758.19	0.00760884		1288.19	0.01268157		1818.19	0.01099655		2348.18	-0.00547085		2878.18	0.00760157		3408.17	0.0012776		3938.17	0.01177183
228.4	0.00065584		758.39	0.00782618		1288.39	0.01335048		1818.39	0.01077471		2348.38	-0.00441567		2878.38	0.00711924		3408.37	0.00162028		3938.37	0.01215984
228.6	0.00092179		758.59	0.00754705		1288.59	0.01363485		1818.59	0.01024332		2348.58	-0.00376297		2878.58	0.00648259		3408.57	0.0012532		3938.57	0.01120971
228.8	0.00057976		758.79	0.00738289		1288.79	0.01440466		1818.79	0.01067633		2348.78	-0.00409496		2878.78	0.00641945		3408.77	0.00034305		3938.77	0.01053321
229	0.00137354		758.99	0.0085264		1288.99	0.01502153		1818.99	0.01180343		2348.98	-0.00387155		2878.98	0.00692768		3408.97	0.00137871		3938.97	0.00926273
229.2	0.00216673		759.19	0.00923999		1289.19	0.01535309		1819.19	0.01216025		2349.18	-0.00389196		2879.18	0.00677491		3409.17	0.00150058		3939.17	0.0086335
229.4	0.00256564		759.39	0.00892893		1289.39	0.01558676		1819.39	0.01258675		2349.38	-0.00495466		2879.38	0.00678767		3409.37	0.00112856		3939.37	0.00946359
229.6	0.00261389		759.59	0.00953528		1289.59	0.01550769		1819.59	0.01247351		2349.58	-0.00645254		2879.58	0.00682776		3409.57	0.00179753		3939.57	0.00928719
229.8	0.0028261		759.79	0.00937857		1289.79	0.01490167		1819.79	0.01298639		2349.78	-0.00645765		2879.78	0.00673069		3409.77	0.0017659		3939.77	0.01046896
230	0.00282535		759.99	0.00914455		1289.99	0.01420432		1819.99	0.01243742		2349.98	-0.0069023		2879.98	0.0066183		3409.97	0.00121815		3939.97	0.01169948
230.2	0.00321123		760.19	0.00830815		1290.19	0.01369934		1820.19	0.01261661		2350.18	-0.00756081		2880.18	0.00625493		3410.17	0.00154981		3940.17	0.01143963
230.4	0.00350478		760.39	0.00813915		1290.39	0.01322658		1820.39	0.01192766		2350.38	-0.0077847		2880.38	0.00473519		3410.37	0.00281575		3940.37	0.01218745
230.6	0.0025593		760.59	0.00783292		1290.59	0.01299364		1820.59	0.011693		2350.58	-0.00924654		2880.58	0.00461667		3410.57	0.00241386		3940.57	0.01245957
230.8	0.00252266		760.79	0.0072781		1290.79	0.01288542		1820.79	0.0118297		2350.78	-0.00891622		2880.78	0.00324002		3410.77	0.00263601		3940.77	0.01269495
231	0.00183818		760.99	0.00690679		1290.99	0.01165119		1820.99	0.01205549		2350.98	-0.0099686		2880.98	0.00275458		3410.97	0.00276363		3940.97	0.01359509
231.2	0.00148036		761.19	0.00696774		1291.19	0.01087254		1821.19	0.01161111		2351.18	-0.01043393		2881.18	0.00283859		3411.17	0.00327236		3941.17	0.01366363
231.4	0.00039013		761.39	0.00573408		1291.39	0.01047277		1821.39	0.01140227		2351.38	-0.00946502		2881.38	0.00278605		3411.37	0.00388727		3941.37	0.01397278
231.6	-0.00006166		761.59	0.00611938		1291.59	0.01013042		1821.59	0.01182134		2351.58	-0.00916238		2881.58	0.00383717		3411.57	0.00398799		3941.57	0.01436414
231.8	-0.00119781		761.79	0.00648872		1291.79	0.00963864		1821.79	0.01238769		2351.78	-0.00829627		2881.78	0.00443545		3411.77	0.0022995		3941.77	0.01575739
232	-0.00084992		761.99	0.00609084		1291.99	0.00950373		1821.99	0.01261245		2351.98	-0.00735818		2881.98	0.00435149		3411.97	0.002566		3941.97	0.01590596
232.2	-0.00083057		762.19	0.00649877		1292.19	0.0102437		1822.19	0.01222298		2352.18	-0.00658189		2882.18	0.00534225		3412.17	0.00243833		3942.17	0.01547365
232.4	-0.00104142		762.39	0.00637593		1292.39	0.01083688		1822.39	0.01280962		2352.38	-0.00654604		2882.38	0.00628392		3412.37	0.00210007		3942.37	0.01592527
232.6	-0.00077691		762.59	0.00574195		1292.59	0.01180667		1822.59	0.0128561		2352.58	-0.00614889		2882.58	0.00733		3412.57	0.00191471		3942.57	0.01528988
232.8	0.00039132		762.79	0.0059645		1292.79	0.01305835		1822.79	0.01385438		2352.78	-0.00646199		2882.78	0.00810477		3412.77	0.00204145		3942.77	0.01534645
233	0.00150355		762.99	0.00601239		1292.99	0.01388432		1822.99	0.0142471		2352.98	-0.00568042		2882.98	0.00888453		3412.97	0.00225602		3942.97	0.01459614
233.2	0.00231808		763.19	0.00584849		1293.19	0.01507204		1823.19	0.014268		2353.18	-0.00598337		2883.18	0.00878001		3413.17	0.00145821		3943.17	0.01474768
233.4	0.00227794		763.39	0.00651024		1293.39	0.01616974		1823.39	0.01438765		2353.38	-0.00678225		2883.38	0.00894151		3413.37	0.00131998		3943.37	0.0152188
233.6	0.00199031		763.59	0.00722106		1293.59	0.01608449		1823.59	0.01508921		2353.58	-0.00741		2883.58	0.01000383		3413.57	0.00136276		3943.57	0.01503578
233.8	0.00230303		763.79	0.00739379		1293.79	0.01621817		1823.79	0.01500854		2353.78	-0.00693245		2883.78	0.0102103		3413.77	0.00111981		3943.77	0.01667035
234	0.00200986		763.99	0.0076908		1293.99	0.01715258		1823.99	0.0152667		2353.98	-0.00732479		2883.98	0.01038038		3413.97	0.00138592		3943.97	0.01744945
234.2	0.00221705		764.19	0.00794963		1294.19	0.01723358		1824.19	0.01540745		2354.18	-0.00796434		2884.18	0.01062406		3414.17	0.00185795		3944.17	0.01712177
234.4	0.00170796		764.39	0.00804711		1294.39	0.01714064		1824.39	0.01600546		2354.38	-0.00762264		2884.38	0.01062819		3414.37	0.0020126		3944.37	0.0177675
234.6	0.00142194		764.59	0.00721575		1294.59	0.01700587		1824.59	0.01607626		2354.58	-0.00841831		2884.58	0.01070981		3414.57	0.00215057		3944.57	0.01813293
234.8	0.00131336		764.79	0.00733282		1294.79	0.01647154		1824.79	0.01562215		2354.78	-0.00800121		2884.78	0.01023158		3414.77	0.0025401		3944.77	0.01805406
235	0.0014016		764.99	0.00744016		1294.99	0.0151735		1824.99	0.01598343		2354.98	-0.00807093		2884.98	0.01028393		3414.97	0.00299638		3944.97	0.01853943
235.2	0.00077216		765.19	0.00752854		1295.19	0.01418705		1825.19	0.01593803		2355.18	-0.00830258		2885.18	0.00965509		3415.17	0.00350394		3945.17	0.01715715
235.4	0.00068601		765.39	0.00805127		1295.39	0.01305695		1825.39	0.0166959		2355.38	-0.0080591		2885.38	0.00886081		3415.37	0.00391307		3945.37	0.0173775
235.6	0.00149374		765.59	0.00892916		1295.59	0.01264109		1825.59	0.01794682		2355.58	-0.00776176		2885.58	0.00924956		3415.57	0.00305217		3945.57	0.01707729
235.8	0.00132398		765.79	0.0089971		1295.79	0.01225967		1825.79	0.01830126		2355.78	-0.00771129		2885.78	0.00816789		3415.77	0.00248377		3945.77	0.01676155
236	0.00237138		765.99	0.00899114		1295.99	0.01201483		1825.99	0.01817188		2355.98	-0.00817677		2885.98	0.00760633		3415.97	0.00305623		3945.97	0.01538836
236.2	0.00252985		766.19	0.00968142		1296.19	0.01288786		1826.19	0.01823492		2356.18	-0.00794542		2886.18	0.00820207		3416.17	0.00235254		3946.17	0.01465426
236.4	0.00309758		766.39	0.00889136		1296.39	0.01277898		1826.39	0.01830454		2356.38	-0.00853643		2886.38	0.00824425		3416.37	0.0020769		3946.37	0.01551853
236.6	0.00355607		766.59	0.00850699		1296.59	0.01409658		1826.59	0.01884898		2356.58	-0.00874989		2886.58	0.00761666		3416.57	0.00274193		3946.57	0.01445964
236.8	0.00453972		766.79	0.00876981		1296.79	0.01503036		1826.79	0.01862235		2356.78	-0.00864659		2886.78	0.00731122		3416.77	0.00266925		3946.77	0.01398463
237	0.00443971		766.99	0.00877941		1296.99	0.01594588		1826.99	0.01812618		2356.98	-0.00849532		2886.98	0.00644805		3416.97	0.00252195		3946.97	0.01348132
237.2	0.00368216		767.19	0.00963737		1297.19	0.01626763		1827.19	0.01783512		2357.18	-0.00861585		2887.18	0.00612397		3417.17	0.00291643		3947.17	0.0134578
237.4	0.0029546		767.39	0.01046956		1297.39	0.01695383		1827.39	0.01703927		2357.38	-0.00922104		2887.38	0.00619636		3417.37	0.00346379		3947.37	0.01336402
237.6	0.00268376		767.59	0.010122		1297.59	0.01679841		1827.59	0.01704296		2357.58	-0.00820755		2887.58	0.00673299		3417.57	0.00236356		3947.57	0.01316279
237.8	0.00159974		767.79	0.01055469		1297.79	0.01764435		1827.79	0.01650865		2357.78	-0.00767898		2887.78	0.00713073		3417.77	0.00293095		3947.77	0.01370485
238	0.00178351		767.99	0.01044331		1297.99	0.01833437		1827.99	0.01655508		2357.98	-0.00805648		2887.98	0.00805384		3417.97	0.00219979		3947.97	0.01442033
238.2	0.00137883		768.19	0.00934556		1298.19	0.01857605		1828.19	0.0164152		2358.18	-0.00771127		2888.18	0.0085436		3418.17	0.0017876		3948.17	0.01367254
238.4	0.00142066		768.39	0.00807319		1298.39	0.01801936		1828.39	0.01670531		2358.38	-0.00664442		2888.38	0.00862951		3418.37	0.00163241		3948.37	0.01442876
238.6	0.00195602		768.59	0.00759461		1298.59	0.01835531		1828.59	0.01670026		2358.58	-0.00663988		2888.58	0.00871209		3418.57	0.00196522		3948.57	0.01446628
238.8	0.0020081		768.79	0.00701553		1298.79	0.01849421		1828.79	0.01706505		2358.78	-0.00587491		2888.78	0.00812009		3418.77	0.00261731		3948.77	0.01405643
239	0.00219059		768.99	0.00644315		1298.99	0.01807987		1828.99	0.01777281		2358.98	-0.0058857		2888.98	0.0076169		3418.97	0.00303035		3948.97	0.01437353
239.2	0.00226838		769.19	0.00684059		1299.19	0.01758998		1829.19	0.01855136		2359.18	-0.00516646		2889.18	0.00697445		3419.17	0.00308408		3949.17	0.01512804
239.4	0.00327301		769.39	0.00679132		1299.39	0.01715792		1829.39	0.01909523		2359.38	-0.00402363		2889.38	0.00678842		3419.37	0.00300618		3949.37	0.01593531
239.6	0.00375375		769.59	0.00656815		1299.59	0.01723538		1829.59	0.02017827		2359.58	-0.0032827		2889.58	0.00679048		3419.57	0.00256024		3949.57	0.01609215
239.8	0.0032705		769.79	0.00627494		1299.79	0.01724179		1829.79	0.02047881		2359.78	-0.00327249		2889.78	0.00672529		3419.77	0.00309607		3949.77	0.01619028
240	0.00371044		769.99	0.00604865		1299.99	0.01689973		1829.99	0.02052109		2359.98	-0.00360611		2889.98	0.0065361		3419.97	0.00316528		3949.97	0.0164007
240.2	0.00407529		770.19	0.00597288		1300.19	0.01772307		1830.19	0.02056081		2360.18	-0.00334712		2890.18	0.00690353		3420.17	0.00296373		3950.17	0.01638284
240.4	0.00455039		770.39	0.00521764		1300.39	0.01769439		1830.39	0.02051315		2360.38	-0.00459185		2890.38	0.00710558		3420.37	0.00388714		3950.37	0.01674833
240.6	0.00448267		770.59	0.00466612		1300.59	0.0185013		1830.59	0.02017445		2360.58	-0.00510569		2890.58	0.00710122		3420.57	0.00382033		3950.57	0.01622272
240.8	0.00416486		770.79	0.00447761		1300.79	0.01856389		1830.79	0.0191988		2360.78	-0.00517268		2890.78	0.00725206		3420.77	0.00346359		3950.77	0.01691835
241	0.00354999		770.99	0.00492149		1300.99	0.01884046		1830.99	0.01859458		2360.98	-0.00604514		2890.98	0.0074172		3420.97	0.00324357		3950.97	0.01735703
241.2	0.00292142		771.19	0.00519923		1301.19	0.0187119		1831.19	0.01756458		2361.18	-0.00670187		2891.18	0.00733681		3421.17	0.00352669		3951.17	0.01818876
241.4	0.00247529		771.39	0.00477668		1301.39	0.01943294		1831.39	0.01628124		2361.38	-0.0074287		2891.38	0.00692258		3421.37	0.00276901		3951.37	0.01830849
241.6	0.00200494		771.59	0.00463725		1301.59	0.01927587		1831.59	0.01562489		2361.58	-0.00710378		2891.58	0.00730997		3421.57	0.00215136		3951.57	0.01812543
241.8	0.00138175		771.79	0.00480266		1301.79	0.01960504		1831.79	0.01498234		2361.78	-0.00754559		2891.78	0.00816278		3421.77	0.00292361		3951.77	0.01796016
242	0.00262255		771.99	0.00406335		1301.99	0.01986246		1831.99	0.01556268		2361.98	-0.00766455		2891.98	0.00828515		3421.97	0.00207091		3951.97	0.01854339
242.2	0.00253627		772.19	0.00325881		1302.19	0.02043469		1832.19	0.01569577		2362.18	-0.0072048		2892.18	0.00860529		3422.17	0.00245217		3952.17	0.01870261
242.4	0.00288077		772.39	0.00424036		1302.39	0.01913313		1832.39	0.01635244		2362.38	-0.00717306		2892.38	0.00878258		3422.37	0.00205235		3952.37	0.01961349
242.6	0.00316484		772.59	0.00448223		1302.59	0.01991397		1832.59	0.0172407		2362.58	-0.00702368		2892.58	0.0091133		3422.57	0.00271581		3952.57	0.01979121
242.8	0.00264195		772.79	0.00446266		1302.79	0.01960316		1832.79	0.0178383		2362.78	-0.00706398		2892.78	0.00900625		3422.77	0.00311796		3952.77	0.02027058
243	0.00275287		772.99	0.00494378		1302.99	0.01959976		1832.99	0.01796193		2362.98	-0.00761763		2892.98	0.00825981		3422.97	0.00245111		3952.97	0.02059273
243.2	0.00239714		773.19	0.00548495		1303.19	0.01928573		1833.19	0.01847756		2363.18	-0.00760778		2893.18	0.00788019		3423.17	0.00171467		3953.17	0.02086733
243.4	0.00178611		773.39	0.00657133		1303.39	0.01876942		1833.39	0.01936338		2363.38	-0.00827884		2893.38	0.00842891		3423.37	0.00110342		3953.37	0.01984498
243.6	0.00191743		773.59	0.00709705		1303.59	0.01843275		1833.59	0.02036758		2363.58	-0.00786499		2893.58	0.00856695		3423.57	0.00046308		3953.57	0.01928029
243.8	0.00152684		773.79	0.00760226		1303.79	0.01820184		1833.79	0.02082906		2363.78	-0.00774137		2893.78	0.00972883		3423.77	0.00051818		3953.77	0.01858548
244	0.00159961		773.99	0.00768585		1303.99	0.01748801		1833.99	0.02101338		2363.98	-0.00842724		2893.98	0.01029402		3423.97	0.00069827		3953.97	0.01783133
244.2	0.00192797		774.19	0.0078909		1304.19	0.01775199		1834.19	0.02141075		2364.18	-0.00835537		2894.18	0.01103877		3424.17	0.00024643		3954.17	0.01742275
244.4	0.00180014		774.39	0.00732252		1304.39	0.01753538		1834.39	0.02116951		2364.38	-0.00801565		2894.38	0.01103106		3424.37	0.00020543		3954.37	0.01711361
244.6	0.0016021		774.59	0.00812689		1304.59	0.01727373		1834.59	0.02096595		2364.58	-0.00859435		2894.58	0.01077469		3424.57	-0.00018793		3954.57	0.01712684
244.8	0.00107753		774.79	0.00806079		1304.79	0.01701525		1834.79	0.02119391		2364.78	-0.00840959		2894.78	0.01084557		3424.77	0.00025216		3954.77	0.01762775
245	0.00185088		774.99	0.00858623		1304.99	0.01746586		1834.99	0.02064451		2364.98	-0.00787506		2894.98	0.01097261		3424.97	0.00124662		3954.97	0.01766616
245.2	0.00188024		775.19	0.00823405		1305.19	0.01763795		1835.19	0.01970017		2365.18	-0.00789152		2895.18	0.00949739		3425.17	0.00238983		3955.17	0.01794142
245.4	0.00162102		775.39	0.00784776		1305.39	0.01856909		1835.39	0.0194175		2365.38	-0.0079271		2895.38	0.00899032		3425.37	0.00266492		3955.37	0.01815138
245.6	0.0017756		775.59	0.00822548		1305.59	0.01869839		1835.59	0.01880301		2365.58	-0.00777254		2895.58	0.00900963		3425.57	0.00396336		3955.57	0.01826452
245.8	0.00280953		775.79	0.00798204		1305.79	0.0195013		1835.79	0.01922575		2365.78	-0.00710144		2895.78	0.00940498		3425.77	0.00438031		3955.77	0.0182868
246	0.00402065		775.99	0.00756886		1305.99	0.02028973		1835.99	0.01980506		2365.98	-0.00686709		2895.98	0.00968174		3425.97	0.00480602		3955.97	0.01952033
246.2	0.00455345		776.19	0.00746209		1306.19	0.02019805		1836.19	0.0195726		2366.18	-0.00682293		2896.18	0.01063717		3426.17	0.00534834		3956.17	0.02023234
246.4	0.00483474		776.39	0.00702992		1306.39	0.01985697		1836.39	0.019535		2366.38	-0.00687409		2896.38	0.0106424		3426.37	0.00608813		3956.37	0.0206323
246.6	0.0060636		776.59	0.00626343		1306.59	0.02092026		1836.59	0.02023783		2366.58	-0.0063662		2896.58	0.01045295		3426.57	0.00666593		3956.57	0.02114562
246.8	0.00512956		776.79	0.00587666		1306.79	0.0209729		1836.79	0.02046123		2366.78	-0.00587594		2896.78	0.0101469		3426.77	0.00660455		3956.77	0.02171993
247	0.00395334		776.99	0.00600033		1306.99	0.02138533		1836.99	0.01992321		2366.98	-0.00632953		2896.98	0.0088134		3426.97	0.00616633		3956.97	0.0214218
247.2	0.00248468		777.19	0.00628278		1307.19	0.0206922		1837.19	0.02059499		2367.18	-0.0063292		2897.18	0.0096772		3427.17	0.005539		3957.17	0.02166277
247.4	0.00218939		777.39	0.00662885		1307.39	0.01963165		1837.39	0.02140947		2367.38	-0.00583932		2897.38	0.01008578		3427.37	0.00500867		3957.37	0.02147804
247.6	0.00211949		777.59	0.00579084		1307.59	0.01924118		1837.59	0.02190528		2367.58	-0.00478056		2897.58	0.01089338		3427.57	0.00447246		3957.57	0.02085329
247.8	0.00125776		777.79	0.00631684		1307.79	0.01884206		1837.79	0.02244764		2367.78	-0.00476159		2897.78	0.01218853		3427.77	0.00408613		3957.77	0.0205707
248	0.00111293		777.99	0.00621689		1307.99	0.01886725		1837.99	0.02249444		2367.98	-0.00413169		2897.98	0.01226736		3427.97	0.00385647		3957.97	0.01947138
248.2	0.00063233		778.19	0.00569739		1308.19	0.0186476		1838.19	0.02282914		2368.18	-0.00309857		2898.18	0.01181487		3428.17	0.00338242		3958.17	0.01923633
248.4	0.00049823		778.39	0.0060228		1308.39	0.01815141		1838.39	0.02247105		2368.38	-0.00277514		2898.38	0.01129003		3428.37	0.0036112		3958.37	0.01873094
248.6	0.0000292		778.59	0.00643925		1308.59	0.01772241		1838.59	0.02223959		2368.58	-0.00356439		2898.58	0.0111385		3428.57	0.00329126		3958.57	0.01858952
248.8	0.00029131		778.79	0.0058734		1308.79	0.01796293		1838.79	0.02242192		2368.78	-0.00398634		2898.78	0.01132117		3428.77	0.00355086		3958.77	0.01860775
249	0.00099684		778.99	0.00616073		1308.99	0.01878383		1838.99	0.0217038		2368.98	-0.00440435		2898.98	0.01045516		3428.97	0.00331056		3958.97	0.01822264
249.2	0.00065433		779.19	0.00597552		1309.19	0.01892469		1839.19	0.02071864		2369.18	-0.00513801		2899.18	0.00965564		3429.17	0.00321592		3959.17	0.01877194
249.4	0.00027693		779.39	0.00673984		1309.39	0.01962132		1839.39	0.0203104		2369.38	-0.0068481		2899.38	0.01007724		3429.37	0.00355094		3959.37	0.01909489
249.6	0.00112624		779.59	0.00705898		1309.59	0.01927845		1839.59	0.0193073		2369.58	-0.00720202		2899.58	0.00968508		3429.57	0.00343043		3959.57	0.01911289
249.8	0.00205993		779.79	0.00698647		1309.79	0.01938149		1839.79	0.01957978		2369.78	-0.00800097		2899.78	0.00975783		3429.77	0.0028164		3959.77	0.01940885
250	0.00227956		779.99	0.00675725		1309.99	0.01927818		1839.99	0.01855522		2369.98	-0.00877388		2899.98	0.01047254		3429.97	0.00292716		3959.97	0.01981902
250.2	0.00281104		780.19	0.00708556		1310.19	0.01873316		1840.19	0.01803438		2370.18	-0.00910069		2900.18	0.01081188		3430.17	0.00289111		3960.17	0.02044552
250.4	0.00328866		780.39	0.00660048		1310.39	0.01876808		1840.39	0.01790208		2370.38	-0.00920157		2900.38	0.01088806		3430.37	0.00262766		3960.37	0.02125265
250.6	0.00284753		780.59	0.00652138		1310.59	0.01811682		1840.59	0.0186722		2370.58	-0.00918841		2900.58	0.01152834		3430.57	0.00204362		3960.57	0.02234879
250.8	0.00111117		780.79	0.0069807		1310.79	0.01807767		1840.79	0.01859812		2370.78	-0.00932125		2900.78	0.01088418		3430.77	0.00208439		3960.77	0.02229658
251	0.00020302		780.99	0.00740011		1310.99	0.01863365		1840.99	0.01860666		2370.98	-0.00974811		2900.98	0.01013379		3430.97	0.00192768		3960.97	0.02287342
251.2	-0.00058444		781.19	0.00746696		1311.19	0.019133		1841.19	0.01974558		2371.18	-0.00888209		2901.18	0.01051432		3431.17	0.00158418		3961.17	0.02353803
251.4	0.0004193		781.39	0.00783188		1311.39	0.01972363		1841.39	0.01978135		2371.38	-0.00866688		2901.38	0.01023402		3431.37	0.00135244		3961.37	0.02399583
251.6	0.00057952		781.59	0.0076834		1311.59	0.0202092		1841.59	0.02113067		2371.58	-0.00737213		2901.58	0.01089659		3431.57	0.00204786		3961.57	0.02402844
251.8	0.00046779		781.79	0.00888884		1311.79	0.02139939		1841.79	0.02193701		2371.78	-0.00720337		2901.78	0.01144682		3431.77	0.00269525		3961.77	0.02390445
252	0.00102887		781.99	0.00876296		1311.99	0.02199729		1841.99	0.02179676		2371.98	-0.00603842		2901.98	0.01057552		3431.97	0.00257619		3961.97	0.0239598
252.2	0.00106242		782.19	0.00843556		1312.19	0.02183194		1842.19	0.0227105		2372.18	-0.00557772		2902.18	0.01125213		3432.17	0.00269851		3962.17	0.02504173
252.4	0.00098052		782.39	0.00859886		1312.39	0.0223828		1842.39	0.02317929		2372.38	-0.00576951		2902.38	0.01069383		3432.37	0.00254306		3962.37	0.02551129
252.6	0.00134509		782.59	0.0093428		1312.59	0.0227989		1842.59	0.02371309		2372.58	-0.00606062		2902.58	0.01002965		3432.57	0.00252444		3962.57	0.02527095
252.8	0.00143972		782.79	0.00997437		1312.79	0.02360154		1842.79	0.0247026		2372.78	-0.00640089		2902.78	0.01004634		3432.77	0.00294631		3962.77	0.02497383
253	0.00093924		782.99	0.0101539		1312.99	0.02389751		1842.99	0.02485473		2372.98	-0.00522035		2902.98	0.00984591		3432.97	0.00286529		3962.97	0.02412823
253.2	0.00052158		783.19	0.01057153		1313.19	0.02432395		1843.19	0.02447033		2373.18	-0.00565846		2903.18	0.00973671		3433.17	0.00373354		3963.17	0.02426413
253.4	0.00000918		783.39	0.0111202		1313.39	0.02383141		1843.39	0.02399099		2373.38	-0.00650354		2903.38	0.00931725		3433.37	0.00441429		3963.37	0.02364862
253.6	0.00062711		783.59	0.01098476		1313.59	0.02299537		1843.59	0.0235446		2373.58	-0.00595239		2903.58	0.00898344		3433.57	0.004122		3963.57	0.02403234
253.8	0.00037678		783.79	0.01091609		1313.79	0.02215301		1843.79	0.02239016		2373.78	-0.00622058		2903.78	0.01009614		3433.77	0.00456188		3963.77	0.02378847
254	0.00079636		783.99	0.0109115		1313.99	0.0216087		1843.99	0.02168657		2373.98	-0.00534319		2903.98	0.01088728		3433.97	0.00449298		3963.97	0.02359641
254.2	0.00096374		784.19	0.01084722		1314.19	0.02121368		1844.19	0.02124581		2374.18	-0.00495714		2904.18	0.01122966		3434.17	0.00393961		3964.17	0.02405783
254.4	0.00069065		784.39	0.00979727		1314.39	0.02113399		1844.39	0.02043065		2374.38	-0.00516359		2904.38	0.01082294		3434.37	0.00300289		3964.37	0.02345557
254.6	0.00008299		784.59	0.00953479		1314.59	0.02058673		1844.59	0.02002247		2374.58	-0.0050657		2904.58	0.01081134		3434.57	0.00377968		3964.57	0.02328525
254.8	0.00009062		784.79	0.00975827		1314.79	0.0216661		1844.79	0.01965447		2374.78	-0.00498959		2904.78	0.0096592		3434.77	0.00443728		3964.77	0.02266966
255	0.00026226		784.99	0.00920426		1314.99	0.0224333		1844.99	0.01898219		2374.98	-0.00386909		2904.98	0.00907095		3434.97	0.00442607		3964.97	0.02285955
255.2	0.00034713		785.19	0.00970168		1315.19	0.02224387		1845.19	0.01826191		2375.18	-0.00366077		2905.18	0.00946617		3435.17	0.0038414		3965.17	0.02253142
255.4	0.00074127		785.39	0.00943731		1315.39	0.02150384		1845.39	0.01751185		2375.38	-0.00415389		2905.38	0.0094734		3435.37	0.00392206		3965.37	0.02240095
255.6	0.00091528		785.59	0.00942679		1315.59	0.02109653		1845.59	0.01802855		2375.58	-0.00398912		2905.58	0.00956706		3435.57	0.00432845		3965.57	0.0222558
255.8	0.000977		785.79	0.0103909		1315.79	0.02101639		1845.79	0.01790566		2375.78	-0.00475328		2905.78	0.01041171		3435.77	0.00396316		3965.77	0.02257275
256	0.00103252		785.99	0.01030118		1315.99	0.02018537		1845.99	0.01763885		2375.98	-0.00508944		2905.98	0.01064803		3435.97	0.00268382		3965.97	0.02311193
256.2	0.0003206		786.19	0.01063038		1316.19	0.02068147		1846.19	0.01780248		2376.18	-0.00497823		2906.18	0.01121314		3436.17	0.00230999		3966.17	0.02400887
256.4	0.00014237		786.39	0.01109353		1316.39	0.0206474		1846.39	0.01777442		2376.38	-0.0055904		2906.38	0.0102558		3436.37	0.00203616		3966.37	0.02423277
256.6	-0.00015904		786.59	0.01220289		1316.59	0.02081704		1846.59	0.01806858		2376.58	-0.00580833		2906.58	0.01076995		3436.57	0.00244163		3966.57	0.02400891
256.8	-0.00125462		786.79	0.01192825		1316.79	0.0213782		1846.79	0.01870364		2376.78	-0.00569235		2906.78	0.01126195		3436.77	0.00169998		3966.77	0.02436151
257	-0.00080507		786.99	0.01203609		1316.99	0.02141832		1846.99	0.0192752		2376.98	-0.00539271		2906.98	0.01219543		3436.97	0.00136699		3966.97	0.02509341
257.2	-0.00154442		787.19	0.01152345		1317.19	0.0208338		1847.19	0.01953898		2377.18	-0.00685705		2907.18	0.01243737		3437.17	0.00155254		3967.17	0.02636741
257.4	-0.00187063		787.39	0.01096802		1317.39	0.02015365		1847.39	0.02098629		2377.38	-0.00691396		2907.38	0.01256537		3437.37	0.00172418		3967.37	0.02685199
257.6	-0.00123416		787.59	0.01017326		1317.59	0.0194468		1847.59	0.02209572		2377.58	-0.00673251		2907.58	0.01355886		3437.57	0.00133855		3967.57	0.02769964
257.8	-0.00067733		787.79	0.00949566		1317.79	0.02021105		1847.79	0.02327576		2377.78	-0.00589902		2907.78	0.01392514		3437.77	0.00177317		3967.77	0.02796447
258	0.00025055		787.99	0.00931233		1317.99	0.02073602		1847.99	0.02437887		2377.98	-0.00536916		2907.98	0.01309111		3437.97	0.00193141		3967.97	0.02857058
258.2	0.00011237		788.19	0.00910074		1318.19	0.02103068		1848.19	0.02474163		2378.18	-0.00600271		2908.18	0.01313275		3438.17	0.00172933		3968.17	0.02887913
258.4	0.00008751		788.39	0.00742539		1318.39	0.02188648		1848.39	0.02485127		2378.38	-0.00579856		2908.38	0.013268		3438.37	0.00229806		3968.37	0.02900068
258.6	0.00069061		788.59	0.00712209		1318.59	0.02179571		1848.59	0.02572695		2378.58	-0.00511217		2908.58	0.01382918		3438.57	0.00349185		3968.57	0.0289488
258.8	0.00106963		788.79	0.00675953		1318.79	0.02225858		1848.79	0.02579968		2378.78	-0.00457513		2908.78	0.01332264		3438.77	0.00376674		3968.77	0.02801859
259	0.00082536		788.99	0.00690311		1318.99	0.02183133		1848.99	0.02592139		2378.98	-0.00438458		2908.98	0.0139478		3438.97	0.00432382		3968.97	0.02705717
259.2	0.00052597		789.19	0.00703547		1319.19	0.02138265		1849.19	0.02646367		2379.18	-0.00455562		2909.18	0.01403415		3439.17	0.00438337		3969.17	0.02716948
259.4	-0.00004755		789.39	0.00737185		1319.39	0.0217438		1849.39	0.02642312		2379.38	-0.00450076		2909.38	0.01315156		3439.37	0.00451645		3969.37	0.02703865
259.6	0.00053957		789.59	0.00774805		1319.59	0.02227769		1849.59	0.02614036		2379.58	-0.0045918		2909.58	0.01328145		3439.57	0.00552822		3969.57	0.02791781
259.8	-0.00011244		789.79	0.00759321		1319.79	0.02244917		1849.79	0.02479317		2379.78	-0.00447477		2909.78	0.01378578		3439.77	0.00581235		3969.77	0.02799929
260	-0.00079843		789.99	0.00792358		1319.99	0.02352874		1849.99	0.02384373		2379.98	-0.0053485		2909.98	0.01425001		3439.97	0.00532141		3969.97	0.02720076
260.2	-0.00030058		790.19	0.00835556		1320.19	0.0244701		1850.19	0.02218723		2380.18	-0.00475807		2910.18	0.01354722		3440.17	0.00539706		3970.17	0.02712168
260.4	0.00018778		790.39	0.0092587		1320.39	0.02370097		1850.39	0.02112287		2380.38	-0.00497001		2910.38	0.01396291		3440.37	0.00568386		3970.37	0.0271714
260.6	0.00046662		790.59	0.00936402		1320.59	0.0242196		1850.59	0.02020883		2380.58	-0.0045897		2910.58	0.01454769		3440.57	0.0056293		3970.57	0.02694672
260.8	0.0004944		790.79	0.00945075		1320.79	0.02403014		1850.79	0.01963086		2380.78	-0.00514517		2910.78	0.01471292		3440.77	0.00489601		3970.77	0.02817502
261	0.00115962		790.99	0.01011481		1320.99	0.02392541		1850.99	0.01982844		2380.98	-0.00590306		2910.98	0.01556671		3440.97	0.00488267		3970.97	0.02897188
261.2	0.00061257		791.19	0.01023448		1321.19	0.02338369		1851.19	0.02029656		2381.18	-0.00637389		2911.18	0.01511396		3441.17	0.00455012		3971.17	0.02924725
261.4	0.0016708		791.39	0.00982065		1321.39	0.02350797		1851.39	0.0212478		2381.38	-0.00590034		2911.38	0.01418739		3441.37	0.00478232		3971.37	0.02893567
261.6	0.00233499		791.59	0.00943608		1321.59	0.02383787		1851.59	0.02142903		2381.58	-0.00631907		2911.58	0.01462878		3441.57	0.00414123		3971.57	0.02883047
261.8	0.00269322		791.79	0.01038794		1321.79	0.0254009		1851.79	0.02197522		2381.78	-0.006458		2911.78	0.0142011		3441.77	0.00348688		3971.77	0.02896916
262	0.00270146		791.99	0.01093529		1321.99	0.02529808		1851.99	0.02134582		2381.98	-0.00663008		2911.98	0.01475914		3441.97	0.00322317		3971.97	0.02893349
262.2	0.00293914		792.19	0.01109752		1322.19	0.02582872		1852.19	0.02158738		2382.18	-0.00701041		2912.18	0.01525486		3442.17	0.002831		3972.17	0.02920601
262.4	0.00310962		792.39	0.01077132		1322.39	0.02662254		1852.39	0.02209935		2382.38	-0.00628108		2912.38	0.0154598		3442.37	0.00223584		3972.37	0.02980924
262.6	0.0031234		792.59	0.01168405		1322.59	0.02589507		1852.59	0.02265205		2382.58	-0.00681207		2912.58	0.01510183		3442.57	0.0017934		3972.57	0.02936157
262.8	0.00241065		792.79	0.01203486		1322.79	0.02581516		1852.79	0.02379776		2382.78	-0.00673472		2912.78	0.01457488		3442.77	0.00092951		3972.77	0.02934172
263	0.00176353		792.99	0.01214619		1322.99	0.02641704		1852.99	0.02439165		2382.98	-0.00723127		2912.98	0.0137793		3442.97	0.00044957		3972.97	0.02982835
263.2	0.00139164		793.19	0.01143099		1323.19	0.02712963		1853.19	0.02469979		2383.18	-0.00772635		2913.18	0.01209837		3443.17	0.0007422		3973.17	0.03106611
263.4	0.00066462		793.39	0.01102172		1323.39	0.02663257		1853.39	0.02442145		2383.38	-0.00807734		2913.38	0.01151441		3443.37	0.00049523		3973.37	0.03197637
263.6	0.00103049		793.59	0.01016188		1323.59	0.02649083		1853.59	0.02485443		2383.58	-0.00803943		2913.58	0.01154779		3443.57	0.00192191		3973.57	0.03234395
263.8	0.0004329		793.79	0.00972184		1323.79	0.02607059		1853.79	0.02430945		2383.78	-0.00800766		2913.78	0.011447		3443.77	0.00153709		3973.77	0.03118895
264	0.00059533		793.99	0.00998382		1323.99	0.02629737		1853.99	0.02480949		2383.98	-0.0079018		2913.98	0.01110407		3443.97	0.00229056		3973.97	0.03032533
264.2	0.00090754		794.19	0.01017761		1324.19	0.02575029		1854.19	0.0249259		2384.18	-0.00733732		2914.18	0.01045582		3444.17	0.00247898		3974.17	0.03011431
264.4	0.00081895		794.39	0.01053531		1324.39	0.0248547		1854.39	0.02484419		2384.38	-0.00673681		2914.38	0.0104075		3444.37	0.0030644		3974.37	0.03093127
264.6	0.00059431		794.59	0.00979068		1324.59	0.02468818		1854.59	0.02503697		2384.58	-0.00658208		2914.58	0.01010115		3444.57	0.0030544		3974.57	0.03131608
264.8	-0.0008888		794.79	0.00905949		1324.79	0.02367401		1854.79	0.02552196		2384.78	-0.00698698		2914.78	0.01023661		3444.77	0.00360952		3974.77	0.03253399
265	-0.00021738		794.99	0.00928002		1324.99	0.02413535		1854.99	0.02612827		2384.98	-0.00691327		2914.98	0.0107562		3444.97	0.00387629		3974.97	0.03242487
265.2	0.00027346		795.19	0.00860913		1325.19	0.02383591		1855.19	0.02617706		2385.18	-0.00567429		2915.18	0.01056456		3445.17	0.00448075		3975.17	0.0326138
265.4	0.00139714		795.39	0.00828322		1325.39	0.02417041		1855.39	0.02686809		2385.38	-0.00570373		2915.38	0.01001941		3445.37	0.00445231		3975.37	0.0328112
265.6	0.00126836		795.59	0.00834302		1325.59	0.02519523		1855.59	0.02730608		2385.58	-0.00617692		2915.58	0.01137784		3445.57	0.00391262		3975.57	0.03300307
265.8	0.00188689		795.79	0.01010405		1325.79	0.02582389		1855.79	0.02672955		2385.78	-0.00606153		2915.78	0.01257675		3445.77	0.0039777		3975.77	0.0337688
266	0.00246855		795.99	0.01044008		1325.99	0.02628679		1855.99	0.02674972		2385.98	-0.00564645		2915.98	0.01355751		3445.97	0.00460143		3975.97	0.03358225
266.2	0.00330256		796.19	0.0109832		1326.19	0.02675636		1856.19	0.02649155		2386.18	-0.00605041		2916.18	0.01421385		3446.17	0.00493762		3976.17	0.03400745
266.4	0.00340879		796.39	0.01167583		1326.39	0.02664649		1856.39	0.02687787		2386.38	-0.00617293		2916.38	0.0148878		3446.37	0.0047623		3976.37	0.03394119
266.6	0.00346872		796.59	0.01193682		1326.59	0.02670062		1856.59	0.02660148		2386.58	-0.00698759		2916.58	0.01511046		3446.57	0.00427722		3976.57	0.03371997
266.8	0.00350603		796.79	0.01228947		1326.79	0.02743937		1856.79	0.02663002		2386.78	-0.0059627		2916.78	0.01503486		3446.77	0.00353898		3976.77	0.03377161
267	0.00438954		796.99	0.01190947		1326.99	0.02789223		1856.99	0.02570716		2386.98	-0.00611629		2916.98	0.01478918		3446.97	0.003476		3976.97	0.03380291
267.2	0.0042164		797.19	0.01150269		1327.19	0.0270189		1857.19	0.02589437		2387.18	-0.00632628		2917.18	0.01538755		3447.17	0.00430198		3977.17	0.03408074
267.4	0.00357139		797.39	0.01120685		1327.39	0.02657768		1857.39	0.02600833		2387.38	-0.00561468		2917.38	0.01586856		3447.37	0.0038194		3977.37	0.03394079
267.6	0.00405338		797.59	0.01125344		1327.59	0.02706788		1857.59	0.02631581		2387.58	-0.00495818		2917.58	0.01579862		3447.57	0.00460945		3977.57	0.03263335
267.8	0.00410654		797.79	0.01137305		1327.79	0.02732322		1857.79	0.02624069		2387.78	-0.00543606		2917.78	0.01613637		3447.77	0.00450656		3977.77	0.03269946
268	0.00401224		797.99	0.01074177		1327.99	0.02703949		1857.99	0.02617291		2387.98	-0.00512382		2917.98	0.01554685		3447.97	0.0048376		3977.97	0.03228456
268.2	0.00355193		798.19	0.01105702		1328.19	0.02715146		1858.19	0.02589511		2388.18	-0.00507627		2918.18	0.01510736		3448.17	0.00407424		3978.17	0.03221218
268.4	0.00401505		798.39	0.0102077		1328.39	0.02677426		1858.39	0.02558474		2388.38	-0.00474487		2918.38	0.01446358		3448.37	0.0042682		3978.37	0.03254285
268.6	0.00340333		798.59	0.00938958		1328.59	0.02685104		1858.59	0.02595093		2388.58	-0.00487645		2918.58	0.01487519		3448.57	0.00352338		3978.57	0.03295586
268.8	0.00279972		798.79	0.00854096		1328.79	0.02719806		1858.79	0.02586906		2388.78	-0.00490821		2918.78	0.01475916		3448.77	0.00343023		3978.77	0.03274053
269	0.00351042		798.99	0.00800162		1328.99	0.02759202		1858.99	0.02619898		2388.98	-0.00448327		2918.98	0.01476873		3448.97	0.00376528		3978.97	0.03279534
269.2	0.00297075		799.19	0.00756012		1329.19	0.02731666		1859.19	0.02638069		2389.18	-0.0045966		2919.18	0.01380719		3449.17	0.00411454		3979.17	0.03327369
269.4	0.00244925		799.39	0.00810644		1329.39	0.0273613		1859.39	0.02720867		2389.38	-0.00518069		2919.38	0.01358591		3449.37	0.00353408		3979.37	0.03406108
269.6	0.00136178		799.59	0.00791193		1329.59	0.02704618		1859.59	0.02670637		2389.58	-0.00500452		2919.58	0.01420745		3449.57	0.00354256		3979.57	0.03387406
269.8	0.00150312		799.79	0.00923201		1329.79	0.02673567		1859.79	0.02629204		2389.78	-0.00505006		2919.78	0.01415828		3449.77	0.00417304		3979.77	0.03403827
270	0.00092161		799.99	0.00890765		1329.99	0.0263916		1859.99	0.02615348		2389.98	-0.00521017		2919.98	0.01360384		3449.97	0.00375666		3979.97	0.03354397
270.2	0.00023556		800.19	0.00950431		1330.19	0.02627852		1860.19	0.02594035		2390.18	-0.00559764		2920.18	0.01417389		3450.17	0.0041446		3980.17	0.03369387
270.4	-0.00037119		800.39	0.00966323		1330.39	0.02542697		1860.39	0.02607739		2390.38	-0.00578976		2920.38	0.01348057		3450.37	0.00411627		3980.37	0.03358373
270.6	-0.00048873		800.59	0.00978706		1330.59	0.02512442		1860.59	0.0260101		2390.58	-0.00522214		2920.58	0.01373058		3450.57	0.00313055		3980.57	0.03359035
270.8	-0.00052549		800.79	0.00956489		1330.79	0.02522282		1860.79	0.02551708		2390.78	-0.00356664		2920.78	0.01394046		3450.77	0.00308361		3980.77	0.03277152
271	-0.00000561		800.99	0.00982334		1330.99	0.02465873		1860.99	0.02549095		2390.98	-0.00315958		2920.98	0.01419046		3450.97	0.00351136		3980.97	0.03283593
271.2	-0.00041675		801.19	0.01039026		1331.19	0.02486687		1861.19	0.02565756		2391.18	-0.00321535		2921.18	0.01466272		3451.17	0.00380261		3981.17	0.03248678
271.4	-0.00057801		801.39	0.00995369		1331.39	0.02509529		1861.39	0.02601849		2391.38	-0.00306637		2921.38	0.01450407		3451.37	0.00407154		3981.37	0.03196858
271.6	0.00041681		801.59	0.01035823		1331.59	0.02536668		1861.59	0.02647491		2391.58	-0.00353149		2921.58	0.0152507		3451.57	0.00466411		3981.57	0.03127415
271.8	0.00147063		801.79	0.0113227		1331.79	0.02535453		1861.79	0.02693888		2391.78	-0.00475927		2921.78	0.01636481		3451.77	0.00465689		3981.77	0.03068534
272	0.00150424		801.99	0.01143896		1331.99	0.02450352		1861.99	0.02608766		2391.98	-0.00460272		2921.98	0.01631531		3451.97	0.00402871		3981.97	0.03006159
272.2	0.00174582		802.19	0.0118688		1332.19	0.02539718		1862.19	0.02595368		2392.18	-0.00540631		2922.18	0.0165849		3452.17	0.00410189		3982.17	0.02993741
272.4	0.00214806		802.39	0.01129355		1332.39	0.02639411		1862.39	0.02653248		2392.38	-0.00573036		2922.38	0.0170317		3452.37	0.00449104		3982.37	0.02995443
272.6	0.00224535		802.59	0.01124842		1332.59	0.02646141		1862.59	0.02675927		2392.58	-0.00598549		2922.58	0.01702295		3452.57	0.00372159		3982.57	0.03001192
272.8	0.00148313		802.79	0.01163648		1332.79	0.02727328		1862.79	0.02686094		2392.78	-0.0068002		2922.78	0.01644586		3452.77	0.0038472		3982.77	0.0302713
273	0.00149685		802.99	0.01152919		1332.99	0.0275566		1862.99	0.02728217		2392.98	-0.00693932		2922.98	0.01661137		3452.97	0.00465212		3982.97	0.03107113
273.2	0.00148982		803.19	0.0120263		1333.19	0.02804633		1863.19	0.02757694		2393.18	-0.00767613		2923.18	0.01603953		3453.17	0.00364866		3983.17	0.03119227
273.4	0.00136479		803.39	0.01144796		1333.39	0.02785281		1863.39	0.02777279		2393.38	-0.00721954		2923.38	0.01600739		3453.37	0.00328289		3983.37	0.0320303
273.6	0.00065628		803.59	0.01046039		1333.59	0.02774594		1863.59	0.02795387		2393.58	-0.00714401		2923.58	0.01551965		3453.57	0.00353535		3983.57	0.03155198
273.8	0.000335		803.79	0.01046434		1333.79	0.02762313		1863.79	0.02774801		2393.78	-0.00707436		2923.78	0.01519133		3453.77	0.003835		3983.77	0.03185974
274	-0.00028886		803.99	0.00909652		1333.99	0.02823848		1863.99	0.02765687		2393.98	-0.00642521		2923.98	0.01560734		3453.97	0.00308824		3983.97	0.03191715
274.2	-0.00032935		804.19	0.008306		1334.19	0.02848982		1864.19	0.02817381		2394.18	-0.00672185		2924.18	0.01578796		3454.17	0.00353097		3984.17	0.0320304
274.4	-0.0002062		804.39	0.00703905		1334.39	0.02849472		1864.39	0.02764607		2394.38	-0.00631417		2924.38	0.01605502		3454.37	0.0030582		3984.37	0.03258282
274.6	-0.0002712		804.59	0.00651057		1334.59	0.02883566		1864.59	0.02848347		2394.58	-0.00526655		2924.58	0.01662647		3454.57	0.00294349		3984.57	0.03250121
274.8	-0.00000176		804.79	0.00573929		1334.79	0.02971128		1864.79	0.02810353		2394.78	-0.00465188		2924.78	0.015955		3454.77	0.00377965		3984.77	0.03144294
275	-0.00033129		804.99	0.00593409		1334.99	0.03011753		1864.99	0.02817297		2394.98	-0.00439663		2924.98	0.01568175		3454.97	0.00383977		3984.97	0.03208269
275.2	-0.00061996		805.19	0.00594191		1335.19	0.03042079		1865.19	0.02841351		2395.18	-0.00426121		2925.18	0.01565417		3455.17	0.00361539		3985.17	0.03169551
275.4	-0.00098516		805.39	0.00532995		1335.39	0.03038496		1865.39	0.02872743		2395.38	-0.00478649		2925.38	0.01556374		3455.37	0.00411855		3985.37	0.0316816
275.6	-0.00025062		805.59	0.00595872		1335.59	0.03075569		1865.59	0.02894586		2395.58	-0.00468846		2925.58	0.01582178		3455.57	0.00386429		3985.57	0.0315491
275.8	0.0005012		805.79	0.00636049		1335.79	0.03020771		1865.79	0.02891816		2395.78	-0.00519424		2925.78	0.0158024		3455.77	0.00421256		3985.77	0.03145928
276	0.00022053		805.99	0.0067567		1335.99	0.03006074		1865.99	0.02783105		2395.98	-0.00561011		2925.98	0.01577818		3455.97	0.00420058		3985.97	0.03286301
276.2	0.00075854		806.19	0.00715237		1336.19	0.03079529		1866.19	0.02744126		2396.18	-0.00579772		2926.18	0.01564204		3456.17	0.00457093		3986.17	0.03250402
276.4	0.0006208		806.39	0.00737927		1336.39	0.03075283		1866.39	0.02734255		2396.38	-0.00451936		2926.38	0.01461675		3456.37	0.00487065		3986.37	0.03340609
276.6	0.00150804		806.59	0.00841405		1336.59	0.03054455		1866.59	0.02720626		2396.58	-0.0042085		2926.58	0.01320533		3456.57	0.00449949		3986.57	0.03392337
276.8	0.00104277		806.79	0.00971637		1336.79	0.03088225		1866.79	0.02731031		2396.78	-0.00321285		2926.78	0.01324114		3456.77	0.00439528		3986.77	0.03376185
277	0.001723		806.99	0.00979839		1336.99	0.02988116		1866.99	0.02736456		2396.98	-0.00203912		2926.98	0.01350539		3456.97	0.00447361		3986.97	0.03351848
277.2	0.00175064		807.19	0.00887835		1337.19	0.02889632		1867.19	0.02704047		2397.18	-0.00169986		2927.18	0.01403686		3457.17	0.00445025		3987.17	0.03357768
277.4	0.00103598		807.39	0.00816866		1337.39	0.02780925		1867.39	0.02681103		2397.38	-0.0012659		2927.38	0.01433618		3457.37	0.00528425		3987.37	0.03327568
277.6	0.00058774		807.59	0.0081495		1337.59	0.02695062		1867.59	0.02735852		2397.58	-0.00198144		2927.58	0.01450297		3457.57	0.00588437		3987.57	0.03222594
277.8	0.00103746		807.79	0.00773375		1337.79	0.02672935		1867.79	0.02760937		2397.78	-0.00172666		2927.78	0.01473672		3457.77	0.00573922		3987.77	0.0320625
278	0.00109743		807.99	0.00702468		1337.99	0.02691748		1867.99	0.02750544		2397.98	-0.00270869		2927.98	0.01534186		3457.97	0.00602192		3987.97	0.0318286
278.2	0.00092806		808.19	0.00626058		1338.19	0.02566904		1868.19	0.02793445		2398.18	-0.00452807		2928.18	0.01571352		3458.17	0.00650259		3988.17	0.03142878
278.4	0.00049886		808.39	0.00622279		1338.39	0.02527981		1868.39	0.02812916		2398.38	-0.0052362		2928.38	0.01675327		3458.37	0.00593467		3988.37	0.03127133
278.6	0.00006838		808.59	0.00585845		1338.59	0.02513816		1868.59	0.02964047		2398.58	-0.00518679		2928.58	0.01640298		3458.57	0.00605223		3988.57	0.03103758
278.8	-0.00050899		808.79	0.00626385		1338.79	0.02396753		1868.79	0.02958396		2398.78	-0.00574895		2928.78	0.01596418		3458.77	0.00606234		3988.77	0.03088818
279	-0.0011759		808.99	0.00590288		1338.99	0.02398789		1868.99	0.02958412		2398.98	-0.00621445		2928.98	0.01631675		3458.97	0.00584676		3988.97	0.03084064
279.2	-0.00128803		809.19	0.00653548		1339.19	0.0239897		1869.19	0.03044355		2399.18	-0.00661219		2929.18	0.01659756		3459.17	0.00598116		3989.17	0.03065659
279.4	-0.00160656		809.39	0.00655866		1339.39	0.02409964		1869.39	0.03078696		2399.38	-0.00757244		2929.38	0.01719957		3459.37	0.00533992		3989.37	0.03135077
279.6	-0.0006902		809.59	0.00708146		1339.59	0.02472991		1869.59	0.03136691		2399.58	-0.00775735		2929.58	0.01719852		3459.57	0.00527207		3989.57	0.03192388
279.8	-0.00063057		809.79	0.00755211		1339.79	0.0255363		1869.79	0.03102083		2399.78	-0.00775988		2929.78	0.01841566		3459.77	0.00572999		3989.77	0.0322137
280	-0.00116768		809.99	0.00795792		1339.99	0.02631763		1869.99	0.03058461		2399.98	-0.00758303		2929.98	0.01907598		3459.97	0.0051233		3989.97	0.03303884
280.2	-0.00096123		810.19	0.00856704		1340.19	0.02757512		1870.19	0.03104857		2400.18	-0.00635865		2930.18	0.01901645		3460.17	0.00544615		3990.17	0.03254248
280.4	-0.0007319		810.39	0.00852978		1340.39	0.02802353		1870.39	0.03151235		2400.38	-0.00551752		2930.38	0.0186699		3460.37	0.00521503		3990.37	0.03356908
280.6	0.00017564		810.59	0.00889969		1340.59	0.02840487		1870.59	0.03126966		2400.58	-0.00542155		2930.58	0.01855128		3460.57	0.00506734		3990.57	0.03408498
280.8	-0.00042406		810.79	0.00985509		1340.79	0.02876251		1870.79	0.03108377		2400.78	-0.00497692		2930.78	0.01872407		3460.77	0.00458411		3990.77	0.03426991
281	-0.00030497		810.99	0.00940925		1340.99	0.02899876		1870.99	0.03078498		2400.98	-0.0053743		2930.98	0.01994878		3460.97	0.00555322		3990.97	0.03480649
281.2	-0.00042532		811.19	0.00854004		1341.19	0.02962492		1871.19	0.02988481		2401.18	-0.00563052		2931.18	0.02001685		3461.17	0.00556248		3991.17	0.03499851
281.4	0.00020859		811.39	0.00838627		1341.39	0.02988135		1871.39	0.0293407		2401.38	-0.00622447		2931.38	0.01966239		3461.37	0.00585604		3991.37	0.0350478
281.6	0.00086568		811.59	0.00820981		1341.59	0.03032654		1871.59	0.02962322		2401.58	-0.0068695		2931.58	0.01891933		3461.57	0.00570623		3991.57	0.03544757
281.8	0.00089793		811.79	0.00734096		1341.79	0.03152934		1871.79	0.02887227		2401.78	-0.00619385		2931.78	0.01898584		3461.77	0.00650463		3991.77	0.03670941
282	0.00034305		811.99	0.00726038		1341.99	0.03116406		1871.99	0.02811342		2401.98	-0.00666669		2931.98	0.01886648		3461.97	0.00690561		3991.97	0.03666134
282.2	-0.00028017		812.19	0.00679538		1342.19	0.03056717		1872.19	0.02866264		2402.18	-0.00715984		2932.18	0.0185078		3462.17	0.006992		3992.17	0.03631485
282.4	0.00025621		812.39	0.00807026		1342.39	0.03094795		1872.39	0.02861814		2402.38	-0.00708023		2932.38	0.01770834		3462.37	0.00667009		3992.37	0.03675449
282.6	0.00010328		812.59	0.00819883		1342.59	0.0311136		1872.59	0.02908626		2402.58	-0.00698307		2932.58	0.01675432		3462.57	0.00699068		3992.57	0.03706504
282.8	0.00062992		812.79	0.00854622		1342.79	0.02982803		1872.79	0.0293635		2402.78	-0.00744446		2932.78	0.0169866		3462.77	0.0066441		3992.77	0.03702856
283	0.00093104		812.99	0.00846048		1342.99	0.03083355		1872.99	0.02891012		2402.98	-0.00718642		2932.98	0.0176662		3462.97	0.00700322		3992.97	0.03638519
283.2	0.0010865		813.19	0.00952851		1343.19	0.03102658		1873.19	0.02922923		2403.18	-0.00631051		2933.18	0.01772312		3463.17	0.00643691		3993.17	0.03681706
283.4	0.00111938		813.39	0.00956876		1343.39	0.03039695		1873.39	0.02827247		2403.38	-0.00641061		2933.38	0.01770771		3463.37	0.0054009		3993.37	0.03750191
283.6	0.00164842		813.59	0.00949179		1343.59	0.030293		1873.59	0.02840691		2403.58	-0.00577287		2933.58	0.01751901		3463.57	0.00576882		3993.57	0.03756591
283.8	0.00171807		813.79	0.00941283		1343.79	0.03023666		1873.79	0.0279698		2403.78	-0.00482209		2933.78	0.01840492		3463.77	0.00452805		3993.77	0.03725621
284	0.00207326		813.99	0.00913331		1343.99	0.02931683		1873.99	0.02926529		2403.98	-0.00406285		2933.98	0.01705753		3463.97	0.00415332		3993.97	0.03708654
284.2	0.00227411		814.19	0.00891773		1344.19	0.02981264		1874.19	0.0295734		2404.18	-0.00360993		2934.18	0.01671804		3464.17	0.00355063		3994.17	0.03666237
284.4	0.00271074		814.39	0.00886892		1344.39	0.02841617		1874.39	0.03017614		2404.38	-0.00413023		2934.38	0.0167051		3464.37	0.00302611		3994.37	0.03788475
284.6	0.00254075		814.59	0.00838195		1344.59	0.02847797		1874.59	0.02992689		2404.58	-0.00389098		2934.58	0.01705027		3464.57	0.00278364		3994.57	0.03792274
284.8	0.00202803		814.79	0.00847943		1344.79	0.02870134		1874.79	0.03037184		2404.78	-0.00405258		2934.78	0.01735397		3464.77	0.00263485		3994.77	0.03766151
285	0.00187826		814.99	0.00709444		1344.99	0.02817887		1874.99	0.03094285		2404.98	-0.00416031		2934.98	0.01853046		3464.97	0.00275794		3994.97	0.03714591
285.2	0.0019176		815.19	0.00649773		1345.19	0.02803821		1875.19	0.03086901		2405.18	-0.00448759		2935.18	0.01822666		3465.17	0.00261211		3995.17	0.03708178
285.4	0.00228648		815.39	0.00649474		1345.39	0.02798503		1875.39	0.03064416		2405.38	-0.00424135		2935.38	0.01850556		3465.37	0.00248192		3995.37	0.03659168
285.6	0.00178446		815.59	0.00573547		1345.59	0.02896216		1875.59	0.03044331		2405.58	-0.00356313		2935.58	0.01881176		3465.57	0.00153853		3995.57	0.03610437
285.8	0.00079423		815.79	0.00505845		1345.79	0.02937213		1875.79	0.03089272		2405.78	-0.0029337		2935.78	0.0199704		3465.77	0.00249285		3995.77	0.03577589
286	0.00003399		815.99	0.00517189		1345.99	0.02953233		1875.99	0.03188625		2405.98	-0.00362655		2935.98	0.02057171		3465.97	0.00256685		3995.97	0.03519705
286.2	0.00013007		816.19	0.00572021		1346.19	0.03047533		1876.19	0.03241573		2406.18	-0.00423614		2936.18	0.01985639		3466.17	0.0029546		3996.17	0.03507368
286.4	0.00062191		816.39	0.00709676		1346.39	0.03183976		1876.39	0.03247842		2406.38	-0.00461379		2936.38	0.01978218		3466.37	0.00286864		3996.37	0.03504715
286.6	0.00113298		816.59	0.0067514		1346.59	0.03292957		1876.59	0.0329532		2406.58	-0.00478559		2936.58	0.0199971		3466.57	0.00310903		3996.57	0.0357676
286.8	0.00147309		816.79	0.00689805		1346.79	0.03337135		1876.79	0.03318392		2406.78	-0.00343096		2936.78	0.02056223		3466.77	0.00293882		3996.77	0.03558946
287	0.00095872		816.99	0.00792646		1346.99	0.03453042		1876.99	0.03238628		2406.98	-0.0025997		2936.98	0.01929902		3466.97	0.0036409		3996.97	0.03531038
287.2	0.00162203		817.19	0.00809963		1347.19	0.03537938		1877.19	0.03179873		2407.18	-0.00204831		2937.18	0.01823666		3467.17	0.00382553		3997.17	0.03506185
287.4	0.00242774		817.39	0.00850993		1347.39	0.03538898		1877.39	0.03135731		2407.38	-0.00195515		2937.38	0.01756403		3467.37	0.00444789		3997.37	0.03532548
287.6	0.00300687		817.59	0.00822342		1347.59	0.03492299		1877.59	0.03138708		2407.58	-0.00071709		2937.58	0.01727642		3467.57	0.00464818		3997.57	0.03520657
287.8	0.00329324		817.79	0.00785062		1347.79	0.03460463		1877.79	0.03124152		2407.78	-0.00058834		2937.78	0.0169352		3467.77	0.00452253		3997.77	0.03525877
288	0.00322835		817.99	0.00769709		1347.99	0.03425942		1877.99	0.03263264		2407.98	-0.00007458		2937.98	0.01573913		3467.97	0.00535659		3997.97	0.03495085
288.2	0.0029125		818.19	0.00760637		1348.19	0.03512538		1878.19	0.03243201		2408.18	0.00004838		2938.18	0.01582446		3468.17	0.00544298		3998.17	0.03537147
288.4	0.00267145		818.39	0.00838108		1348.39	0.03392592		1878.39	0.03259602		2408.38	-0.00084595		2938.38	0.01659619		3468.37	0.00633801		3998.37	0.03621913
288.6	0.00341417		818.59	0.00758557		1348.59	0.03424323		1878.59	0.03258717		2408.58	-0.00017453		2938.58	0.01717791		3468.57	0.00638883		3998.57	0.0361039
288.8	0.00346758		818.79	0.00791714		1348.79	0.03350772		1878.79	0.03323006		2408.78	-0.00122058		2938.78	0.01674878		3468.77	0.00728499		3998.77	0.03680734
289	0.00300007		818.99	0.00668853		1348.99	0.03301226		1878.99	0.03269979		2408.98	-0.00232819		2938.98	0.01732169		3468.97	0.00744176		3998.97	0.03685841
289.2	0.00313823		819.19	0.00705396		1349.19	0.03226069		1879.19	0.03287796		2409.18	-0.00345221		2939.18	0.01726609		3469.17	0.0073629		3999.17	0.03655294
289.4	0.00320671		819.39	0.00690178		1349.39	0.03253124		1879.39	0.03201102		2409.38	-0.0028669		2939.38	0.01808692		3469.37	0.00649872		3999.37	0.03622013
289.6	0.00295728		819.59	0.00615781		1349.59	0.03219115		1879.59	0.03212568		2409.58	-0.00294664		2939.58	0.01884431		3469.57	0.00610142		3999.57	0.03621818
289.8	0.00249657		819.79	0.00665968		1349.79	0.03170429		1879.79	0.03349423		2409.78	-0.00331015		2939.78	0.01871057		3469.77	0.00610174		3999.77	0.03720409
290	0.00190324		819.99	0.00684071		1349.99	0.03117743		1879.99	0.0334049		2409.98	-0.00314938		2939.98	0.01834868		3469.97	0.00543035		3999.97	0.03778813
290.2	0.00216243		820.19	0.00750139		1350.19	0.03104437		1880.19	0.03320188		2410.18	-0.00361721		2940.18	0.0177253		3470.17	0.00435938		4000.17	0.03839646
290.4	0.00193582		820.39	0.00841086		1350.39	0.03073222		1880.39	0.03295155		2410.38	-0.00406845		2940.38	0.01760658		3470.37	0.00362923		4000.37	0.03975768
290.6	0.00114608		820.59	0.00854138		1350.59	0.0305522		1880.59	0.03364337		2410.58	-0.00428987		2940.58	0.0172036		3470.57	0.00378873		4000.57	0.04072759
290.8	0.00047617		820.79	0.00849989		1350.79	0.03069776		1880.79	0.0338385		2410.78	-0.00344201		2940.78	0.01724867		3470.77	0.00413701		4000.77	0.0405104
291	0.00013342		820.99	0.0087107		1350.99	0.03077299		1880.99	0.03333367		2410.98	-0.00445893		2940.98	0.0165872		3470.97	0.00452321		4000.97	0.0410557
291.2	0.00065371		821.19	0.00884221		1351.19	0.03088287		1881.19	0.03332416		2411.18	-0.00478075		2941.18	0.01710411		3471.17	0.00508948		4001.17	0.04162855
291.4	0.00021216		821.39	0.0086823		1351.39	0.03034152		1881.39	0.03317919		2411.38	-0.00532514		2941.38	0.01772261		3471.37	0.00484982		4001.37	0.04202898
291.6	0.00007624		821.59	0.00828409		1351.59	0.02909657		1881.59	0.03306606		2411.58	-0.00482406		2941.58	0.01819679		3471.57	0.00473749		4001.57	0.04207414
291.8	-0.0007036		821.79	0.00779517		1351.79	0.02916103		1881.79	0.03362472		2411.78	-0.00532682		2941.78	0.018871		3471.77	0.00484491		4001.77	0.04187193
292	-0.00104195		821.99	0.00855574		1351.99	0.02964184		1881.99	0.03469133		2411.98	-0.00486416		2941.98	0.0196586		3471.97	0.00510475		4001.97	0.04189415
292.2	-0.00091971		822.19	0.00848842		1352.19	0.03078969		1882.19	0.03464376		2412.18	-0.00449567		2942.18	0.01975389		3472.17	0.00547394		4002.17	0.04292843
292.4	-0.00086668		822.39	0.00834778		1352.39	0.0309983		1882.39	0.03522571		2412.38	-0.00457826		2942.38	0.01988063		3472.37	0.00658945		4002.37	0.04264984
292.6	0.00044659		822.59	0.00748139		1352.59	0.03183414		1882.59	0.03522133		2412.58	-0.00411414		2942.58	0.01952787		3472.57	0.00621906		4002.57	0.0434962
292.8	-0.00020756		822.79	0.00697348		1352.79	0.03231954		1882.79	0.03581779		2412.78	-0.00466124		2942.78	0.01880161		3472.77	0.00733555		4002.77	0.0430789
293	-0.00034017		822.99	0.00619389		1352.99	0.03299808		1882.99	0.03555543		2412.98	-0.00468161		2942.98	0.01940468		3472.97	0.00777398		4002.97	0.04242687
293.2	0.00012182		823.19	0.00634286		1353.19	0.03290701		1883.19	0.03631219		2413.18	-0.00373719		2943.18	0.01925455		3473.17	0.00724787		4003.17	0.04215846
293.4	0.00045181		823.39	0.00574382		1353.39	0.03399036		1883.39	0.03600652		2413.38	-0.00273305		2943.38	0.01986688		3473.37	0.00684501		4003.37	0.041662
293.6	0.00077031		823.59	0.00473601		1353.59	0.03249335		1883.59	0.03623183		2413.58	-0.00174922		2943.58	0.0191897		3473.57	0.00675622		4003.57	0.04167626
293.8	0.0014667		823.79	0.00436846		1353.79	0.03284091		1883.79	0.03633414		2413.78	-0.00113692		2943.78	0.01854952		3473.77	0.00644531		4003.77	0.04192167
294	0.00210749		823.99	0.004416		1353.99	0.03214869		1883.99	0.036496		2413.98	-0.00105102		2943.98	0.01894578		3473.97	0.00662657		4003.97	0.04132588
294.2	0.00230791		824.19	0.00443669		1354.19	0.03255043		1884.19	0.03621636		2414.18	-0.00114582		2944.18	0.01959949		3474.17	0.00721079		4004.17	0.04166036
294.4	0.00216276		824.39	0.00511195		1354.39	0.0317647		1884.39	0.03625117		2414.38	-0.00085617		2944.38	0.01962587		3474.37	0.0078394		4004.37	0.04184068
294.6	0.00159639		824.59	0.00580634		1354.59	0.0322433		1884.59	0.0365486		2414.58	-0.00135509		2944.58	0.01996034		3474.57	0.00727856		4004.57	0.04159478
294.8	0.00154289		824.79	0.00570315		1354.79	0.03133439		1884.79	0.03626022		2414.78	-0.00187672		2944.78	0.02022231		3474.77	0.00716164		4004.77	0.04153654
295	0.00184975		824.99	0.00647024		1354.99	0.03056305		1884.99	0.03567913		2414.98	-0.00289971		2944.98	0.0202343		3474.97	0.00670975		4004.97	0.04130748
295.2	0.00197297		825.19	0.00793979		1355.19	0.03020999		1885.19	0.03546207		2415.18	-0.00355328		2945.18	0.02091888		3475.17	0.0067563		4005.17	0.04051779
295.4	0.00156738		825.39	0.00826016		1355.39	0.02986227		1885.39	0.03484952		2415.38	-0.00414547		2945.38	0.02133792		3475.37	0.00612045		4005.37	0.03926076
295.6	0.00174768		825.59	0.00905598		1355.59	0.02882114		1885.59	0.03580986		2415.58	-0.00418538		2945.58	0.02181462		3475.57	0.00695942		4005.57	0.03888965
295.8	0.00102537		825.79	0.00933		1355.79	0.02929866		1885.79	0.03574101		2415.78	-0.00443631		2945.78	0.02280213		3475.77	0.006528		4005.77	0.03863008
296	0.00123988		825.99	0.00993495		1355.99	0.02951132		1885.99	0.03630384		2415.98	-0.00370658		2945.98	0.02245829		3475.97	0.00680676		4005.97	0.03863168
296.2	0.0017675		826.19	0.0102706		1356.19	0.02990478		1886.19	0.03679107		2416.18	-0.00426594		2946.18	0.02163613		3476.17	0.00677814		4006.17	0.03887097
296.4	0.00208469		826.39	0.0103342		1356.39	0.03098314		1886.39	0.03694668		2416.38	-0.00414198		2946.38	0.02144978		3476.37	0.0062306		4006.37	0.03914392
296.6	0.00247286		826.59	0.01054332		1356.59	0.03159422		1886.59	0.03666892		2416.58	-0.00425453		2946.58	0.02186132		3476.57	0.00507317		4006.57	0.04034158
296.8	0.00235843		826.79	0.01071582		1356.79	0.03241816		1886.79	0.036955		2416.78	-0.00411968		2946.78	0.0215301		3476.77	0.00526783		4006.77	0.04067168
297	0.00344098		826.99	0.01059352		1356.99	0.03390392		1886.99	0.03635288		2416.98	-0.00438926		2946.98	0.02094157		3476.97	0.0053003		4006.97	0.04072681
297.2	0.00412695		827.19	0.00945737		1357.19	0.03375809		1887.19	0.03670301		2417.18	-0.00370478		2947.18	0.02104318		3477.17	0.00471296		4007.17	0.04185427
297.4	0.00498559		827.39	0.00878731		1357.39	0.03458459		1887.39	0.0368321		2417.38	-0.00335367		2947.38	0.02070042		3477.37	0.00425828		4007.37	0.04288962
297.6	0.00597841		827.59	0.00813195		1357.59	0.03452857		1887.59	0.03701732		2417.58	-0.0030429		2947.58	0.01960531		3477.57	0.00438876		4007.57	0.04408057
297.8	0.00562825		827.79	0.00836065		1357.79	0.03649961		1887.79	0.03727194		2417.78	-0.00307714		2947.78	0.01945686		3477.77	0.00426847		4007.77	0.04439946
298	0.00551509		827.99	0.00890984		1357.99	0.03648222		1887.99	0.03720703		2417.98	-0.00311822		2947.98	0.02002177		3477.97	0.00459087		4007.97	0.04509465
298.2	0.00412633		828.19	0.00826317		1358.19	0.03767487		1888.19	0.03701209		2418.18	-0.00289555		2948.18	0.02038388		3478.17	0.0047324		4008.17	0.04534475
298.4	0.00425324		828.39	0.00851741		1358.39	0.03745827		1888.39	0.03640859		2418.38	-0.002895		2948.38	0.02023038		3478.37	0.0040086		4008.37	0.04666629
298.6	0.00292547		828.59	0.00927745		1358.59	0.03804076		1888.59	0.03567208		2418.58	-0.00348705		2948.58	0.01917368		3478.57	0.0033535		4008.57	0.0466323
298.8	0.00195814		828.79	0.00840804		1358.79	0.03729686		1888.79	0.03530591		2418.78	-0.00403709		2948.78	0.01858147		3478.77	0.0035001		4008.77	0.04593584
299	0.00217877		828.99	0.00846876		1358.99	0.03795431		1888.99	0.03479676		2418.98	-0.00376331		2948.98	0.01814752		3478.97	0.00407504		4008.97	0.04565236
299.2	0.00143713		829.19	0.00853585		1359.19	0.03746625		1889.19	0.03406933		2419.18	-0.00376334		2949.18	0.01849579		3479.17	0.00436308		4009.17	0.04474102
299.4	0.0004704		829.39	0.0078502		1359.39	0.03620364		1889.39	0.03473235		2419.38	-0.00344968		2949.38	0.01851177		3479.37	0.00468224		4009.37	0.04323052
299.6	-0.00030454		829.59	0.00820494		1359.59	0.03500301		1889.59	0.03482543		2419.58	-0.00376959		2949.58	0.01846806		3479.57	0.00491124		4009.57	0.04281793
299.8	-0.00130392		829.79	0.00856994		1359.79	0.03524704		1889.79	0.0340495		2419.78	-0.00373664		2949.78	0.01874239		3479.77	0.00406354		4009.77	0.04213657
300	-0.0015882		829.99	0.00817666		1359.99	0.03434501		1889.99	0.03428249		2419.98	-0.00209268		2949.98	0.01826675		3479.97	0.00451671		4009.97	0.04170564
300.2	-0.00134689		830.19	0.00884456		1360.19	0.03393867		1890.19	0.03361122		2420.18	-0.00202247		2950.18	0.0187271		3480.17	0.00347865		4010.17	0.04206253
300.4	-0.00071445		830.39	0.00925395		1360.39	0.03425323		1890.39	0.03363193		2420.38	-0.00077529		2950.38	0.01928191		3480.37	0.00338634		4010.37	0.04191595
300.6	0.00070784		830.59	0.0097384		1360.59	0.03384066		1890.59	0.0335798		2420.58	-0.00002889		2950.58	0.0192125		3480.57	0.00415165		4010.57	0.04142304
300.8	0.00144362		830.79	0.01007146		1360.79	0.03338227		1890.79	0.03397162		2420.78	0.00071112		2950.78	0.01902205		3480.77	0.0042434		4010.77	0.04128488
301	0.00235146		830.99	0.00989094		1360.99	0.03314431		1890.99	0.0345565		2420.98	0.0008428		2950.98	0.01852569		3480.97	0.00500386		4010.97	0.04105916
301.2	0.00231841		831.19	0.01015145		1361.19	0.03215453		1891.19	0.03552145		2421.18	0.00166078		2951.18	0.01986911		3481.17	0.00462489		4011.17	0.04197052
301.4	0.00242052		831.39	0.00995313		1361.39	0.03202588		1891.39	0.03571398		2421.38	0.00185463		2951.38	0.01946297		3481.37	0.00454681		4011.37	0.04285692
301.6	0.00198512		831.59	0.0099259		1361.59	0.03144369		1891.59	0.03627436		2421.58	0.00114274		2951.58	0.01990931		3481.57	0.00532602		4011.57	0.04320848
301.8	0.00163205		831.79	0.00957474		1361.79	0.03195118		1891.79	0.03701923		2421.78	0.001152		2951.78	0.02099797		3481.77	0.00518241		4011.77	0.04413195
302	0.00172833		831.99	0.00951681		1361.99	0.03183524		1891.99	0.03841457		2421.98	0.0010919		2951.98	0.02120201		3481.97	0.00554169		4011.97	0.04483967
302.2	0.00169005		832.19	0.00831607		1362.19	0.03281948		1892.19	0.03939041		2422.18	0.00067178		2952.18	0.02132168		3482.17	0.00482277		4012.17	0.04515966
302.4	0.00285965		832.39	0.00827026		1362.39	0.03249329		1892.39	0.03990419		2422.38	0.00078822		2952.38	0.02076426		3482.37	0.00577847		4012.37	0.04578228
302.6	0.0018586		832.59	0.00904361		1362.59	0.03284657		1892.59	0.04048502		2422.58	0.00058412		2952.58	0.02019762		3482.57	0.00685439		4012.57	0.04562198
302.8	0.00175632		832.79	0.0083277		1362.79	0.03256105		1892.79	0.04067386		2422.78	0.00018892		2952.78	0.01956071		3482.77	0.00758766		4012.77	0.04572081
303	0.0013665		832.99	0.00841118		1362.99	0.03271173		1892.99	0.04099873		2422.98	-0.00022419		2952.98	0.01927363		3482.97	0.00827818		4012.97	0.04599131
303.2	0.00140866		833.19	0.00834903		1363.19	0.03171084		1893.19	0.04093142		2423.18	-0.00022878		2953.18	0.01989114		3483.17	0.00832435		4013.17	0.04600176
303.4	0.00160735		833.39	0.00889466		1363.39	0.03217772		1893.39	0.04131314		2423.38	-0.00057058		2953.38	0.01949802		3483.37	0.00861028		4013.37	0.04535466
303.6	0.0016001		833.59	0.00931638		1363.59	0.03211831		1893.59	0.04045939		2423.58	-0.00178144		2953.58	0.01898205		3483.57	0.00883726		4013.57	0.0460189
303.8	0.00192461		833.79	0.00950102		1363.79	0.03268461		1893.79	0.0403006		2423.78	-0.00137739		2953.78	0.01933874		3483.77	0.00895172		4013.77	0.0456489
304	0.00278332		833.99	0.00929579		1363.99	0.03226828		1893.99	0.0399648		2423.98	-0.00054299		2953.98	0.01929613		3483.97	0.00866071		4013.97	0.04557587
304.2	0.00394733		834.19	0.00992702		1364.19	0.03286179		1894.19	0.03862318		2424.18	-0.00123006		2954.18	0.01873992		3484.17	0.00784499		4014.17	0.04474885
304.4	0.00411236		834.39	0.0103697		1364.39	0.03308708		1894.39	0.0388118		2424.38	-0.00068348		2954.38	0.01889009		3484.37	0.00877462		4014.37	0.04385696
304.6	0.00379278		834.59	0.00977186		1364.59	0.03365792		1894.59	0.03824942		2424.58	-0.00122981		2954.58	0.01865446		3484.57	0.00922557		4014.57	0.0443128
304.8	0.00289447		834.79	0.00980291		1364.79	0.03344981		1894.79	0.03892091		2424.78	-0.00138868		2954.78	0.01938988		3484.77	0.00842399		4014.77	0.04396868
305	0.00231686		834.99	0.01003492		1364.99	0.03336053		1894.99	0.03779205		2424.98	-0.00155381		2954.98	0.01911479		3484.97	0.00847747		4014.97	0.04353777
305.2	0.00165631		835.19	0.00881764		1365.19	0.03379999		1895.19	0.03771997		2425.18	-0.00130424		2955.18	0.01975114		3485.17	0.00801025		4015.17	0.04375383
305.4	0.00174086		835.39	0.00824381		1365.39	0.03406956		1895.39	0.03836789		2425.38	-0.0013006		2955.38	0.01935268		3485.37	0.00844025		4015.37	0.04410882
305.6	0.00143573		835.59	0.00845316		1365.59	0.03459874		1895.59	0.03952158		2425.58	-0.00106917		2955.58	0.01996935		3485.57	0.00766611		4015.57	0.04442107
305.8	0.00131064		835.79	0.00801562		1365.79	0.03588911		1895.79	0.04058461		2425.78	-0.00016861		2955.78	0.02034088		3485.77	0.00639187		4015.77	0.04489139
306	0.00133878		835.99	0.00787904		1365.99	0.03617618		1895.99	0.04122067		2425.98	0.00035776		2955.98	0.02016926		3485.97	0.00617113		4015.97	0.04512055
306.2	0.0012543		836.19	0.00809022		1366.19	0.03703135		1896.19	0.04099792		2426.18	0.00041144		2956.18	0.02040044		3486.17	0.00586913		4016.17	0.045446
306.4	0.00065987		836.39	0.00846777		1366.39	0.0369506		1896.39	0.04040156		2426.38	-0.00004248		2956.38	0.01992609		3486.37	0.00773811		4016.37	0.04525223
306.6	0.00047145		836.59	0.00980766		1366.59	0.03691595		1896.59	0.03957058		2426.58	0.00002937		2956.58	0.02016511		3486.57	0.00807031		4016.57	0.04588767
306.8	0.0008667		836.79	0.00945599		1366.79	0.03679783		1896.79	0.03861108		2426.78	0.0000142		2956.78	0.01940969		3486.77	0.00784425		4016.77	0.04654314
307	0.00105086		836.99	0.00954027		1366.99	0.03687875		1896.99	0.03856226		2426.98	0.00002041		2956.98	0.01976964		3486.97	0.00751818		4016.97	0.04673554
307.2	0.00212568		837.19	0.01017718		1367.19	0.03640504		1897.19	0.03784333		2427.18	0.00088808		2957.18	0.02056597		3487.17	0.00767592		4017.17	0.0477485
307.4	0.00284477		837.39	0.01030793		1367.39	0.03696716		1897.39	0.03726621		2427.38	0.00083131		2957.38	0.02082522		3487.37	0.00721135		4017.37	0.04780931
307.6	0.00392506		837.59	0.01157118		1367.59	0.03567345		1897.59	0.0362722		2427.58	0.00055403		2957.58	0.02058188		3487.57	0.0071281		4017.57	0.04845411
307.8	0.00466546		837.79	0.01187953		1367.79	0.03626954		1897.79	0.03550594		2427.78	0.00060887		2957.78	0.02007677		3487.77	0.00620164		4017.77	0.04829567
308	0.00499282		837.99	0.01173145		1367.99	0.03542599		1897.99	0.03519137		2427.98	-0.00010804		2957.98	0.02045411		3487.97	0.00601815		4017.97	0.04906152
308.2	0.00468576		838.19	0.01162692		1368.19	0.03493272		1898.19	0.03374995		2428.18	-0.00085073		2958.18	0.02066465		3488.17	0.00619927		4018.17	0.04872085
308.4	0.00398254		838.39	0.01102577		1368.39	0.03426841		1898.39	0.0341738		2428.38	-0.00090833		2958.38	0.02149956		3488.37	0.00636969		4018.37	0.04899941
308.6	0.00370379		838.59	0.01063589		1368.59	0.03382884		1898.59	0.03458804		2428.58	-0.00139876		2958.58	0.02216143		3488.57	0.00633418		4018.57	0.04930024
308.8	0.00379956		838.79	0.01091403		1368.79	0.03303477		1898.79	0.03521641		2428.78	-0.00121445		2958.78	0.02299372		3488.77	0.0058755		4018.77	0.04884724
309	0.00302909		838.99	0.01041947		1368.99	0.03249574		1898.99	0.03545487		2428.98	-0.00077969		2958.98	0.02312493		3488.97	0.00659905		4018.97	0.04890884
309.2	0.00330886		839.19	0.00987708		1369.19	0.03248761		1899.19	0.03678417		2429.18	-0.0009587		2959.18	0.02347692		3489.17	0.00643644		4019.17	0.04923454
309.4	0.00370724		839.39	0.01035592		1369.39	0.03233364		1899.39	0.03868972		2429.38	-0.00130005		2959.38	0.0236175		3489.37	0.00638341		4019.37	0.04994885
309.6	0.00309844		839.59	0.01019232		1369.59	0.03232946		1899.59	0.0401281		2429.58	-0.00145532		2959.58	0.02359776		3489.57	0.0060258		4019.57	0.0504433
309.8	0.00322968		839.79	0.00934493		1369.79	0.0323582		1899.79	0.04051032		2429.78	-0.00113092		2959.78	0.023678		3489.77	0.00594934		4019.77	0.05074987
310	0.003695		839.99	0.00867775		1369.99	0.03266965		1899.99	0.04030779		2429.98	-0.00120883		2959.98	0.0227711		3489.97	0.0064171		4019.97	0.05137197
310.2	0.00285781		840.19	0.00839657		1370.19	0.03273265		1900.19	0.03973725		2430.18	-0.00142652		2960.18	0.02134892		3490.17	0.00742743		4020.17	0.05122244
310.4	0.00293104		840.39	0.00833178		1370.39	0.03264469		1900.39	0.03975525		2430.38	-0.0018594		2960.38	0.02054961		3490.37	0.00753137		4020.37	0.0513124
310.6	0.00332245		840.59	0.00859989		1370.59	0.03238931		1900.59	0.04020235		2430.58	-0.00145268		2960.58	0.0201814		3490.57	0.00730292		4020.57	0.05167641
310.8	0.00356025		840.79	0.00782459		1370.79	0.03259061		1900.79	0.04048681		2430.78	-0.00101627		2960.78	0.01923198		3490.77	0.00679463		4020.77	0.05227398
311	0.00358923		840.99	0.00787417		1370.99	0.03327487		1900.99	0.04130902		2430.98	-0.00119656		2960.98	0.01863722		3490.97	0.00743937		4020.97	0.05172915
311.2	0.00352431		841.19	0.00748616		1371.19	0.03401493		1901.19	0.04148975		2431.18	-0.00039864		2961.18	0.01807876		3491.17	0.00798002		4021.17	0.05293742
311.4	0.00377741		841.39	0.00751591		1371.39	0.03534647		1901.39	0.04114152		2431.38	-0.00027952		2961.38	0.01774362		3491.37	0.00792731		4021.37	0.05283477
311.6	0.00472786		841.59	0.00866466		1371.59	0.0357517		1901.59	0.04078606		2431.58	-0.00020948		2961.58	0.01731141		3491.57	0.00818796		4021.57	0.05268071
311.8	0.00501252		841.79	0.00803228		1371.79	0.03649282		1901.79	0.0403258		2431.78	-0.00038968		2961.78	0.01711772		3491.77	0.00896473		4021.77	0.05200618
312	0.00510734		841.99	0.00731696		1371.99	0.03746958		1901.99	0.03954013		2431.98	-0.00097219		2961.98	0.01845764		3491.97	0.00918584		4021.97	0.0512676
312.2	0.00543764		842.19	0.00709949		1372.19	0.03833863		1902.19	0.03900923		2432.18	-0.00118021		2962.18	0.01986391		3492.17	0.00960575		4022.17	0.04917681
312.4	0.00551055		842.39	0.00751216		1372.39	0.03919334		1902.39	0.03859956		2432.38	0.00014899		2962.38	0.02068985		3492.37	0.00940107		4022.37	0.04837677
312.6	0.00581085		842.59	0.00721953		1372.59	0.03883431		1902.59	0.03873966		2432.58	0.00069711		2962.58	0.02223794		3492.57	0.00959497		4022.57	0.04727552
312.8	0.00547164		842.79	0.00699877		1372.79	0.03908564		1902.79	0.03845746		2432.78	-0.00003594		2962.78	0.02324303		3492.77	0.00942754		4022.77	0.04720305
313	0.00552616		842.99	0.00717042		1372.99	0.03846		1902.99	0.0387021		2432.98	-0.00017129		2962.98	0.02359014		3492.97	0.01009355		4022.97	0.04700023
313.2	0.00611921		843.19	0.00730516		1373.19	0.03895248		1903.19	0.0388002		2433.18	-0.00034146		2963.18	0.02383		3493.17	0.00976602		4023.17	0.04659004
313.4	0.00637397		843.39	0.00713469		1373.39	0.03906623		1903.39	0.03968723		2433.38	-0.00063247		2963.38	0.02397295		3493.37	0.00988776		4023.37	0.0466312
313.6	0.00608594		843.59	0.00734917		1373.59	0.03891322		1903.59	0.04018192		2433.58	-0.00101667		2963.58	0.02386036		3493.57	0.00977848		4023.57	0.04657588
313.8	0.00537588		843.79	0.007458		1373.79	0.03809298		1903.79	0.03964195		2433.78	-0.00030839		2963.78	0.02431045		3493.77	0.00932984		4023.77	0.04687914
314	0.0044436		843.99	0.00720054		1373.99	0.0372091		1903.99	0.03921032		2433.98	0.00008445		2963.98	0.02314941		3493.97	0.00888146		4023.97	0.04736012
314.2	0.003838		844.19	0.00742093		1374.19	0.03655727		1904.19	0.03932311		2434.18	0.00076347		2964.18	0.02255889		3494.17	0.0083071		4024.17	0.04810146
314.4	0.00303048		844.39	0.00806633		1374.39	0.03663252		1904.39	0.040126		2434.38	0.00167771		2964.38	0.02295983		3494.37	0.00718536		4024.37	0.04884047
314.6	0.00213472		844.59	0.00769818		1374.59	0.03626347		1904.59	0.04054463		2434.58	0.00155541		2964.58	0.02250911		3494.57	0.0064638		4024.57	0.04970717
314.8	0.0024029		844.79	0.00791429		1374.79	0.03591103		1904.79	0.04045224		2434.78	0.00195283		2964.78	0.02196031		3494.77	0.00609915		4024.77	0.05006809
315	0.00212227		844.99	0.00750181		1374.99	0.03635364		1904.99	0.04064269		2434.98	0.00108322		2964.98	0.02150317		3494.97	0.0060048		4024.97	0.05066337
315.2	0.00186302		845.19	0.0066171		1375.19	0.03641914		1905.19	0.04115633		2435.18	0.00133405		2965.18	0.02123767		3495.17	0.00592454		4025.17	0.0509203
315.4	0.00161923		845.39	0.00763683		1375.39	0.0368762		1905.39	0.04067358		2435.38	0.00095095		2965.38	0.02143577		3495.37	0.00580932		4025.37	0.05114646
315.6	0.00233476		845.59	0.00739966		1375.59	0.03651131		1905.59	0.04065656		2435.58	0.00061103		2965.58	0.02164399		3495.57	0.00525545		4025.57	0.05115196
315.8	0.0028421		845.79	0.00771253		1375.79	0.03714912		1905.79	0.03997513		2435.78	0.00041133		2965.78	0.02177299		3495.77	0.00604787		4025.77	0.05139958
316	0.00308188		845.99	0.00761635		1375.99	0.03796621		1905.99	0.03997007		2435.98	0.00050694		2965.98	0.0224981		3495.97	0.00600217		4025.97	0.05075085
316.2	0.00388415		846.19	0.00784031		1376.19	0.03725642		1906.19	0.0397039		2436.18	0.00062358		2966.18	0.02282513		3496.17	0.00701568		4026.17	0.05047612
316.4	0.0037907		846.39	0.00822319		1376.39	0.03712956		1906.39	0.03913569		2436.38	0.00113217		2966.38	0.02269842		3496.37	0.00725414		4026.37	0.05089527
316.6	0.00402414		846.59	0.00710859		1376.59	0.03629326		1906.59	0.0397921		2436.58	0.00020721		2966.58	0.02368394		3496.57	0.00810296		4026.57	0.05168122
316.8	0.00344741		846.79	0.00705304		1376.79	0.03723884		1906.79	0.03926095		2436.78	-0.00060887		2966.78	0.02367944		3496.77	0.00837955		4026.77	0.05294114
317	0.00332621		846.99	0.00717283		1376.99	0.03700361		1906.99	0.03942549		2436.98	-0.00066126		2966.98	0.02327493		3496.97	0.009123		4026.97	0.05318997
317.2	0.00331601		847.19	0.00715569		1377.19	0.03758311		1907.19	0.03953343		2437.18	-0.00049388		2967.18	0.02333541		3497.17	0.00958762		4027.17	0.05306905
317.4	0.00320508		847.39	0.00787341		1377.39	0.03741213		1907.39	0.03971171		2437.38	-0.00166772		2967.38	0.02350518		3497.37	0.00951396		4027.37	0.05331032
317.6	0.00252991		847.59	0.00800175		1377.59	0.03708274		1907.59	0.04001212		2437.58	-0.00155615		2967.58	0.02413954		3497.57	0.00909148		4027.57	0.0539059
317.8	0.0010815		847.79	0.00780958		1377.79	0.03669787		1907.79	0.03941852		2437.78	-0.00086798		2967.78	0.02406625		3497.77	0.00864643		4027.77	0.05445949
318	0.00065575		847.99	0.00764972		1377.99	0.03692489		1907.99	0.0402461		2437.98	-0.00007531		2967.98	0.02343997		3497.97	0.00773348		4027.97	0.054876
318.2	0.00007205		848.19	0.00868997		1378.19	0.03771302		1908.19	0.04049593		2438.18	0.00044859		2968.18	0.02401733		3498.17	0.00776273		4028.17	0.05560125
318.4	-0.00104051		848.39	0.00944129		1378.39	0.03741244		1908.39	0.04085333		2438.38	0.0003171		2968.38	0.02431848		3498.37	0.00778931		4028.37	0.05604941
318.6	-0.00075782		848.59	0.0095484		1378.59	0.03767894		1908.59	0.04142416		2438.58	-0.0011481		2968.58	0.02404175		3498.57	0.00685213		4028.57	0.05629984
318.8	-0.00133902		848.79	0.00869777		1378.79	0.03726055		1908.79	0.0411138		2438.78	-0.00165791		2968.78	0.0240752		3498.77	0.00696293		4028.77	0.05522091
319	-0.00111804		848.99	0.00804499		1378.99	0.0377297		1908.99	0.04206627		2438.98	-0.00197604		2968.98	0.02423581		3498.97	0.00676908		4028.97	0.05422235
319.2	-0.00142967		849.19	0.00796732		1379.19	0.03816415		1909.19	0.04314835		2439.18	-0.00048392		2969.18	0.02424754		3499.17	0.00669484		4029.17	0.05367517
319.4	-0.0012103		849.39	0.00902282		1379.39	0.03853306		1909.39	0.04263058		2439.38	-0.0002025		2969.38	0.02405203		3499.37	0.00658262		4029.37	0.05439185
319.6	0.00005024		849.59	0.00904533		1379.59	0.03880379		1909.59	0.04400108		2439.58	-0.00059143		2969.58	0.02377615		3499.57	0.00638861		4029.57	0.05420868
319.8	0.00045931		849.79	0.01044923		1379.79	0.03870722		1909.79	0.04437378		2439.78	-0.00018688		2969.78	0.02376762		3499.77	0.00728785		4029.77	0.05418721
320	0.0006254		849.99	0.01059072		1379.99	0.03863051		1909.99	0.04404096		2439.98	-0.00009572		2969.98	0.02334346		3499.97	0.00799853		4029.97	0.05357534
320.2	0.00123476		850.19	0.00998741		1380.19	0.03880826		1910.19	0.04401198		2440.18	-0.00010139		2970.18	0.02278366		3500.17	0.00864681		4030.17	0.05379259
320.4	0.00037516		850.39	0.00995466		1380.39	0.03920172		1910.39	0.04465053		2440.38	0.00018527		2970.38	0.0236647		3500.37	0.00920146		4030.37	0.05361934
320.6	-0.00005502		850.59	0.00929519		1380.59	0.03932547		1910.59	0.044141		2440.58	0.0010453		2970.58	0.02456282		3500.57	0.00953284		4030.57	0.05443784
320.8	-0.00017676		850.79	0.00872037		1380.79	0.03990392		1910.79	0.04321762		2440.78	0.00193813		2970.78	0.02472619		3500.77	0.00934733		4030.77	0.05439547
321	0.00022505		850.99	0.0087816		1380.99	0.03993561		1910.99	0.04290304		2440.98	0.00177527		2970.98	0.02482933		3500.97	0.01006226		4030.97	0.05390009
321.2	0.00035181		851.19	0.00894473		1381.19	0.03984164		1911.19	0.04237025		2441.18	0.00147817		2971.18	0.02563772		3501.17	0.00967285		4031.17	0.05403295
321.4	-0.00011333		851.39	0.00871123		1381.39	0.03994213		1911.39	0.04131256		2441.38	0.00107219		2971.38	0.02569634		3501.37	0.00894294		4031.37	0.0540281
321.6	-0.00048663		851.59	0.00877896		1381.59	0.03937271		1911.59	0.04112218		2441.58	0.00170746		2971.58	0.0260061		3501.57	0.00942306		4031.57	0.0543638
321.8	-0.0014303		851.79	0.0085383		1381.79	0.03899191		1911.79	0.04061793		2441.78	0.00143187		2971.78	0.02519383		3501.77	0.00898194		4031.77	0.05487451
322	-0.00187161		851.99	0.00864254		1381.99	0.03816037		1911.99	0.0416329		2441.98	0.00160909		2971.98	0.02574286		3501.97	0.0085244		4031.97	0.05504482
322.2	-0.00218178		852.19	0.00915348		1382.19	0.03815077		1912.19	0.04112993		2442.18	0.00156637		2972.18	0.02632921		3502.17	0.00814857		4032.17	0.056072
322.4	-0.00199176		852.39	0.00814526		1382.39	0.03731219		1912.39	0.04173146		2442.38	0.00068297		2972.38	0.0258843		3502.37	0.0078804		4032.37	0.05658836
322.6	-0.00101303		852.59	0.00794201		1382.59	0.03771244		1912.59	0.0426673		2442.58	0.00054813		2972.58	0.02597529		3502.57	0.00667882		4032.57	0.05629489
322.8	-0.00056796		852.79	0.00775309		1382.79	0.03800141		1912.79	0.04240984		2442.78	0.00068132		2972.78	0.02633195		3502.77	0.00669631		4032.77	0.05628612
323	0.00060742		852.99	0.00867983		1382.99	0.03809869		1912.99	0.04392593		2442.98	0.00161005		2972.98	0.02624426		3502.97	0.0061548		4032.97	0.0560055
323.2	0.00155981		853.19	0.00916187		1383.19	0.03888144		1913.19	0.04334658		2443.18	0.0014591		2973.18	0.02603409		3503.17	0.00572046		4033.17	0.05644218
323.4	0.00319681		853.39	0.00961197		1383.39	0.03936492		1913.39	0.04390522		2443.38	0.00039663		2973.38	0.0255272		3503.37	0.00561453		4033.37	0.05631501
323.6	0.00395374		853.59	0.01012529		1383.59	0.0396069		1913.59	0.04426203		2443.58	-0.00051784		2973.58	0.02537588		3503.57	0.00580537		4033.57	0.05658497
323.8	0.00409147		853.79	0.01043437		1383.79	0.03909173		1913.79	0.04361128		2443.78	-0.00024745		2973.78	0.0252908		3503.77	0.00595522		4033.77	0.0564382
324	0.00423985		853.99	0.0091644		1383.99	0.03976646		1913.99	0.04324171		2443.98	-0.00030537		2973.98	0.02483042		3503.97	0.00681437		4033.97	0.05640652
324.2	0.00448372		854.19	0.00928223		1384.19	0.03969493		1914.19	0.04388102		2444.18	0.00010283		2974.18	0.0250424		3504.17	0.00711643		4034.17	0.0560031
324.4	0.00388224		854.39	0.00893479		1384.39	0.03982401		1914.39	0.04308445		2444.38	0.00065101		2974.38	0.02569744		3504.37	0.00749497		4034.37	0.056404
324.6	0.00422155		854.59	0.00926545		1384.59	0.04018744		1914.59	0.04253022		2444.58	0.00241768		2974.58	0.02588299		3504.57	0.00772923		4034.57	0.05637482
324.8	0.00461434		854.79	0.00874725		1384.79	0.04112365		1914.79	0.04204438		2444.78	0.00326531		2974.78	0.02596362		3504.77	0.0080897		4034.77	0.05590481
325	0.00435402		854.99	0.00893412		1384.99	0.04200954		1914.99	0.04196585		2444.98	0.00311109		2974.98	0.02620114		3504.97	0.00798507		4034.97	0.0551697
325.2	0.00407071		855.19	0.00886659		1385.19	0.04217802		1915.19	0.04191513		2445.18	0.00355584		2975.18	0.02641027		3505.17	0.00771379		4035.17	0.0560215
325.4	0.00330156		855.39	0.00868883		1385.39	0.04190259		1915.39	0.04128399		2445.38	0.004571		2975.38	0.02579762		3505.37	0.00839623		4035.37	0.05600441
325.6	0.00225454		855.59	0.00888699		1385.59	0.04122598		1915.59	0.04184371		2445.58	0.0046852		2975.58	0.02632322		3505.57	0.00933003		4035.57	0.05709058
325.8	0.00173889		855.79	0.00838944		1385.79	0.04029553		1915.79	0.04193697		2445.78	0.00484273		2975.78	0.0262795		3505.77	0.00873586		4035.77	0.05720988
326	0.00073996		855.99	0.00831721		1385.99	0.04001358		1915.99	0.04208994		2445.98	0.0045942		2975.98	0.02671238		3505.97	0.00858353		4035.97	0.05756507
326.2	0.00034018		856.19	0.00860662		1386.19	0.04045435		1916.19	0.04175777		2446.18	0.00482657		2976.18	0.02624079		3506.17	0.00826694		4036.17	0.05814897
326.4	0.00008436		856.39	0.00827453		1386.39	0.04021709		1916.39	0.04238267		2446.38	0.00394346		2976.38	0.02544343		3506.37	0.00886257		4036.37	0.05783387
326.6	0.00081301		856.59	0.0091092		1386.59	0.04017811		1916.59	0.04284793		2446.58	0.00388686		2976.58	0.0253522		3506.57	0.00805451		4036.57	0.05784872
326.8	0.00121308		856.79	0.00874616		1386.79	0.03981009		1916.79	0.0428346		2446.78	0.00300546		2976.78	0.02545321		3506.77	0.00807078		4036.77	0.05817241
327	0.00085737		856.99	0.00834708		1386.99	0.03988543		1916.99	0.04368315		2446.98	0.00256498		2976.98	0.02462238		3506.97	0.0080465		4036.97	0.05733304
327.2	0.00106427		857.19	0.00803206		1387.19	0.03982745		1917.19	0.04293406		2447.18	0.00109277		2977.18	0.02459718		3507.17	0.00870071		4037.17	0.0569305
327.4	0.00068494		857.39	0.00830812		1387.39	0.03938608		1917.39	0.04390683		2447.38	0.00090082		2977.38	0.02499422		3507.37	0.00882906		4037.37	0.056613
327.6	0.0007172		857.59	0.0082332		1387.59	0.03891071		1917.59	0.04323532		2447.58	0.00005565		2977.58	0.02453625		3507.57	0.00925167		4037.57	0.05683042
327.8	0.00138507		857.79	0.00890036		1387.79	0.0382903		1917.79	0.04364018		2447.78	0.00003529		2977.78	0.02374109		3507.77	0.00948221		4037.77	0.05667658
328	0.00212543		857.99	0.00865951		1387.99	0.03823903		1917.99	0.04430565		2447.98	-0.00069624		2977.98	0.02381199		3507.97	0.01022602		4037.97	0.05676336
328.2	0.00204885		858.19	0.00935974		1388.19	0.03779696		1918.19	0.043605		2448.18	-0.00025552		2978.18	0.02431332		3508.17	0.01021585		4038.17	0.0559951
328.4	0.00287926		858.39	0.0091081		1388.39	0.03835192		1918.39	0.04341873		2448.38	0.00046263		2978.38	0.0240154		3508.37	0.00998705		4038.37	0.05657549
328.6	0.00325744		858.59	0.01038734		1388.59	0.0398042		1918.59	0.04398724		2448.58	0.00159456		2978.58	0.02419719		3508.57	0.00984115		4038.57	0.05642313
328.8	0.00401543		858.79	0.00991363		1388.79	0.04054381		1918.79	0.04408937		2448.78	0.00212952		2978.78	0.0252161		3508.77	0.01027901		4038.77	0.05647139
329	0.00445665		858.99	0.01021844		1388.99	0.04117132		1918.99	0.04529605		2448.98	0.00203389		2978.98	0.02639024		3508.97	0.00968235		4038.97	0.05714407
329.2	0.0052174		859.19	0.01105384		1389.19	0.04157902		1919.19	0.04595278		2449.18	0.00343263		2979.18	0.02725109		3509.17	0.01026835		4039.17	0.05807647
329.4	0.00493284		859.39	0.0114376		1389.39	0.04150073		1919.39	0.0467284		2449.38	0.00377479		2979.38	0.02791578		3509.37	0.01064902		4039.37	0.05901461
329.6	0.00478096		859.59	0.01144689		1389.59	0.04158729		1919.59	0.04687643		2449.58	0.00424474		2979.58	0.02779776		3509.57	0.01044426		4039.57	0.05925568
329.8	0.00428506		859.79	0.01192425		1389.79	0.04236851		1919.79	0.04647686		2449.78	0.00379701		2979.78	0.02694891		3509.77	0.00998826		4039.77	0.05910968
330	0.00358825		859.99	0.01225529		1389.99	0.04264731		1919.99	0.04595491		2449.98	0.00358045		2979.98	0.02690326		3509.97	0.00982547		4039.97	0.05932495
330.2	0.00363335		860.19	0.01206853		1390.19	0.04308997		1920.19	0.04550113		2450.18	0.0042988		2980.18	0.02620135		3510.17	0.00954204		4040.17	0.05963782
330.4	0.00325707		860.39	0.01197497		1390.39	0.04322747		1920.39	0.04573096		2450.38	0.00368567		2980.38	0.02628453		3510.37	0.0097645		4040.37	0.05909481
330.6	0.0038223		860.59	0.01178807		1390.59	0.04214789		1920.59	0.04591924		2450.58	0.00402057		2980.58	0.02659485		3510.57	0.00950822		4040.57	0.05941541
330.8	0.0030347		860.79	0.01182011		1390.79	0.04200244		1920.79	0.04587638		2450.78	0.00400111		2980.78	0.02691458		3510.77	0.00933909		4040.77	0.05921379
331	0.00202468		860.99	0.01140926		1390.99	0.04219497		1920.99	0.04561707		2450.98	0.0036793		2980.98	0.0265834		3510.97	0.00886924		4040.97	0.05807973
331.2	0.00210222		861.19	0.01117397		1391.19	0.04125695		1921.19	0.04537446		2451.18	0.00351741		2981.18	0.02668803		3511.17	0.00916789		4041.17	0.05767027
331.4	0.00207964		861.39	0.01101708		1391.39	0.04059412		1921.39	0.04479527		2451.38	0.00387391		2981.38	0.02676177		3511.37	0.00918479		4041.37	0.0574879
331.6	0.00277764		861.59	0.01097778		1391.59	0.04097199		1921.59	0.04371407		2451.58	0.00372881		2981.58	0.02603372		3511.57	0.00918874		4041.57	0.05738874
331.8	0.00341146		861.79	0.01103748		1391.79	0.04089965		1921.79	0.0430593		2451.78	0.00335469		2981.78	0.0260851		3511.77	0.00968807		4041.77	0.05745405
332	0.00322503		861.99	0.01006595		1391.99	0.0411128		1921.99	0.04228272		2451.98	0.00321537		2981.98	0.02672025		3511.97	0.00980848		4041.97	0.05771532
332.2	0.00326968		862.19	0.01001537		1392.19	0.04142945		1922.19	0.04132611		2452.18	0.00379738		2982.18	0.02702759		3512.17	0.00998785		4042.17	0.05746665
332.4	0.0039888		862.39	0.00992155		1392.39	0.04170786		1922.39	0.04137901		2452.38	0.00297263		2982.38	0.0271179		3512.37	0.01022478		4042.37	0.05882649
332.6	0.00474342		862.59	0.01007562		1392.59	0.04267521		1922.59	0.04167044		2452.58	0.00263023		2982.58	0.02776125		3512.57	0.01027984		4042.57	0.05848575
332.8	0.0058094		862.79	0.00883816		1392.79	0.04308092		1922.79	0.04221217		2452.78	0.0021863		2982.78	0.02845935		3512.77	0.01108132		4042.77	0.05897065
333	0.005863		862.99	0.00908846		1392.99	0.04373229		1922.99	0.04305639		2452.98	0.0025324		2982.98	0.02883477		3512.97	0.01050832		4042.97	0.05953527
333.2	0.00611905		863.19	0.00917993		1393.19	0.04441971		1923.19	0.04310871		2453.18	0.00301677		2983.18	0.02894104		3513.17	0.00955541		4043.17	0.05920959
333.4	0.00501361		863.39	0.00888442		1393.39	0.04418628		1923.39	0.04348414		2453.38	0.00313277		2983.38	0.02816132		3513.37	0.00983961		4043.37	0.05975404
333.6	0.00474614		863.59	0.00917808		1393.59	0.04429101		1923.59	0.04339214		2453.58	0.00321624		2983.58	0.0275138		3513.57	0.01029477		4043.57	0.05895664
333.8	0.00397743		863.79	0.01080475		1393.79	0.0447758		1923.79	0.04370982		2453.78	0.0024528		2983.78	0.02775215		3513.77	0.01032921		4043.77	0.05976853
334	0.00394745		863.99	0.01090269		1393.99	0.04494931		1923.99	0.04349371		2453.98	0.00227856		2983.98	0.02749997		3513.97	0.0107612		4043.97	0.06025668
334.2	0.00294206		864.19	0.01124232		1394.19	0.04512857		1924.19	0.04380706		2454.18	0.0024613		2984.18	0.02676167		3514.17	0.01146114		4044.17	0.0603185
334.4	0.00159736		864.39	0.01158157		1394.39	0.04500167		1924.39	0.0450764		2454.38	0.0023413		2984.38	0.02776846		3514.37	0.01168718		4044.37	0.05989682
334.6	0.00157703		864.59	0.01105596		1394.59	0.0445556		1924.59	0.04528485		2454.58	0.00245248		2984.58	0.02776689		3514.57	0.01216355		4044.57	0.0604038
334.8	0.00066202		864.79	0.01071204		1394.79	0.04442853		1924.79	0.04509373		2454.78	0.00316412		2984.78	0.02715157		3514.77	0.01189339		4044.77	0.05974238
335	0.00020148		864.99	0.00912632		1394.99	0.04425496		1924.99	0.0451833		2454.98	0.00284302		2984.98	0.02667693		3514.97	0.01191153		4044.97	0.05917953
335.2	0.00039122		865.19	0.00877649		1395.19	0.04450188		1925.19	0.04509267		2455.18	0.00297277		2985.18	0.02651406		3515.17	0.01296725		4045.17	0.05923014
335.4	0.00048717		865.39	0.00852774		1395.39	0.04431169		1925.39	0.04523008		2455.38	0.00256291		2985.38	0.0267228		3515.37	0.01333866		4045.37	0.05862346
335.6	0.0008085		865.59	0.00861173		1395.59	0.04491575		1925.59	0.04495458		2455.58	0.00227152		2985.58	0.02685585		3515.57	0.01344702		4045.57	0.05821986
335.8	0.00084246		865.79	0.0082771		1395.79	0.04492042		1925.79	0.04519791		2455.78	0.00144014		2985.78	0.02724683		3515.77	0.01400607		4045.77	0.05821761
336	0.00143103		865.99	0.00756609		1395.99	0.04459445		1925.99	0.04534952		2455.98	0.00210065		2985.98	0.02740543		3515.97	0.01335459		4045.97	0.05875279
336.2	0.00208482		866.19	0.0074277		1396.19	0.04430998		1926.19	0.04612986		2456.18	0.00161192		2986.18	0.02738791		3516.17	0.01366414		4046.17	0.05799469
336.4	0.00350721		866.39	0.00688292		1396.39	0.04396502		1926.39	0.04565038		2456.38	0.00131828		2986.38	0.02741124		3516.37	0.01392207		4046.37	0.05858728
336.6	0.00493662		866.59	0.00621351		1396.59	0.04450112		1926.59	0.04631636		2456.58	0.00085031		2986.58	0.02702421		3516.57	0.01387798		4046.57	0.05879786
336.8	0.00565787		866.79	0.0061603		1396.79	0.04406513		1926.79	0.04614085		2456.78	0.00129545		2986.78	0.02709899		3516.77	0.01383034		4046.77	0.05934878
337	0.00551466		866.99	0.00664128		1396.99	0.04319613		1926.99	0.04560485		2456.98	0.00110325		2986.98	0.02674038		3516.97	0.01341754		4046.97	0.05896981
337.2	0.00596248		867.19	0.00666442		1397.19	0.04236709		1927.19	0.04566346		2457.18	0.00164084		2987.18	0.0264127		3517.17	0.01191973		4047.17	0.05850104
337.4	0.00604715		867.39	0.00736093		1397.39	0.04189504		1927.39	0.04620083		2457.38	0.00252915		2987.38	0.02644165		3517.37	0.01224021		4047.37	0.05917562
337.6	0.00625928		867.59	0.00734844		1397.59	0.04241796		1927.59	0.04708551		2457.58	0.00212801		2987.58	0.02622962		3517.57	0.01190446		4047.57	0.05957366
337.8	0.00536776		867.79	0.00757922		1397.79	0.04285386		1927.79	0.04690645		2457.78	0.00239052		2987.78	0.02606223		3517.77	0.0114973		4047.77	0.06035762
338	0.00504418		867.99	0.0063673		1397.99	0.04356989		1927.99	0.04672534		2457.98	0.00284547		2987.98	0.02581618		3517.97	0.01197557		4047.97	0.06033094
338.2	0.00420055		868.19	0.00646558		1398.19	0.0427697		1928.19	0.04731318		2458.18	0.00369482		2988.18	0.02665193		3518.17	0.01259253		4048.17	0.06011632
338.4	0.00317535		868.39	0.00621245		1398.39	0.04332336		1928.39	0.04791427		2458.38	0.00406222		2988.38	0.02708778		3518.37	0.01262958		4048.37	0.06020907
338.6	0.00386561		868.59	0.00534427		1398.59	0.04309886		1928.59	0.04760076		2458.58	0.00420311		2988.58	0.02694633		3518.57	0.01315245		4048.57	0.06105714
338.8	0.00451228		868.79	0.00481875		1398.79	0.04293056		1928.79	0.04738933		2458.78	0.00473392		2988.78	0.02624143		3518.77	0.01282188		4048.77	0.06146379
339	0.00406848		868.99	0.0050919		1398.99	0.04306008		1928.99	0.04746145		2458.98	0.00371949		2988.98	0.02725788		3518.97	0.01284967		4048.97	0.06166833
339.2	0.00438122		869.19	0.00608238		1399.19	0.04356487		1929.19	0.04723123		2459.18	0.00314868		2989.18	0.02794178		3519.17	0.01281323		4049.17	0.06174339
339.4	0.00443486		869.39	0.00618406		1399.39	0.04384485		1929.39	0.04717772		2459.38	0.00300903		2989.38	0.02831029		3519.37	0.0128204		4049.37	0.0617774
339.6	0.00467677		869.59	0.00671571		1399.59	0.04407369		1929.59	0.04697719		2459.58	0.00307502		2989.58	0.02835187		3519.57	0.01274951		4049.57	0.06203401
339.8	0.00499896		869.79	0.00658961		1399.79	0.04404926		1929.79	0.04763954		2459.78	0.00349787		2989.78	0.02807223		3519.77	0.0128152		4049.77	0.0621142
340	0.00519053		869.99	0.00691221		1399.99	0.04329579		1929.99	0.04742235		2459.98	0.00386275		2989.98	0.02823222		3519.97	0.01236063		4049.97	0.0617792
340.2	0.00588521		870.19	0.00823312		1400.19	0.04345728		1930.19	0.04704397		2460.18	0.00319616		2990.18	0.02822968		3520.17	0.01290911		4050.17	0.06174045
340.4	0.00747461		870.39	0.00911741		1400.39	0.04418298		1930.39	0.04640908		2460.38	0.00273747		2990.38	0.02802211		3520.37	0.0127459		4050.37	0.06312463
340.6	0.00750374		870.59	0.00974672		1400.59	0.04464569		1930.59	0.04617418		2460.58	0.00187517		2990.58	0.02859128		3520.57	0.01226027		4050.57	0.06295468
340.8	0.0075873		870.79	0.01024854		1400.79	0.04413909		1930.79	0.04480669		2460.78	0.00190931		2990.78	0.02869282		3520.77	0.01213928		4050.77	0.06250314
341	0.00745003		870.99	0.01090858		1400.99	0.04360482		1930.99	0.04394406		2460.98	0.00150644		2990.98	0.0280768		3520.97	0.0112685		4050.97	0.06338774
341.2	0.00737923		871.19	0.01077616		1401.19	0.04384982		1931.19	0.04471944		2461.18	0.00238121		2991.18	0.02828168		3521.17	0.00985955		4051.17	0.06301954
341.4	0.00640365		871.39	0.01100494		1401.39	0.04468676		1931.39	0.04553001		2461.38	0.00279622		2991.38	0.02814252		3521.37	0.00945757		4051.37	0.06397071
341.6	0.00512415		871.59	0.01035819		1401.59	0.04487221		1931.59	0.04599904		2461.58	0.00243233		2991.58	0.02814167		3521.57	0.00959056		4051.57	0.06339291
341.8	0.00477455		871.79	0.01083328		1401.79	0.04477019		1931.79	0.04554208		2461.78	0.00223371		2991.78	0.02857481		3521.77	0.00999721		4051.77	0.06265545
342	0.00483626		871.99	0.01122585		1401.99	0.04471255		1931.99	0.04657664		2461.98	0.00227627		2991.98	0.02920088		3521.97	0.01065918		4051.97	0.06267949
342.2	0.00380209		872.19	0.01112623		1402.19	0.04432561		1932.19	0.04765226		2462.18	0.00159068		2992.18	0.02958933		3522.17	0.01109996		4052.17	0.06242964
342.4	0.0035273		872.39	0.01126643		1402.39	0.04406031		1932.39	0.0481361		2462.38	0.00162562		2992.38	0.02879397		3522.37	0.01157767		4052.37	0.06293947
342.6	0.00455036		872.59	0.01163902		1402.59	0.04463016		1932.59	0.04938064		2462.58	0.00130475		2992.58	0.02908707		3522.57	0.01169454		4052.57	0.06333419
342.8	0.00456598		872.79	0.01113039		1402.79	0.04483745		1932.79	0.04911637		2462.78	0.00184227		2992.78	0.02891533		3522.77	0.01172582		4052.77	0.06306096
343	0.00375285		872.99	0.01130784		1402.99	0.04404923		1932.99	0.04943999		2462.98	0.00174358		2992.98	0.02995059		3522.97	0.01159591		4052.97	0.06261896
343.2	0.00371475		873.19	0.01030251		1403.19	0.04493745		1933.19	0.05030982		2463.18	0.00191095		2993.18	0.02973366		3523.17	0.01078102		4053.17	0.06252791
343.4	0.00386078		873.39	0.00920351		1403.39	0.04478316		1933.39	0.05055929		2463.38	0.00263669		2993.38	0.02940841		3523.37	0.0107053		4053.37	0.06231516
343.6	0.00453586		873.59	0.00828022		1403.59	0.04446786		1933.59	0.05131055		2463.58	0.0032008		2993.58	0.02951402		3523.57	0.00985319		4053.57	0.06195145
343.8	0.00463881		873.79	0.00775422		1403.79	0.04482529		1933.79	0.05159949		2463.78	0.00357784		2993.78	0.02927206		3523.77	0.00940733		4053.77	0.06163539
344	0.00436693		873.99	0.00809504		1403.99	0.04443132		1933.99	0.05086632		2463.98	0.00343214		2993.98	0.02970838		3523.97	0.00846085		4053.97	0.06151249
344.2	0.0051753		874.19	0.00822833		1404.19	0.04508978		1934.19	0.05057702		2464.18	0.0034004		2994.18	0.02938		3524.17	0.00805201		4054.17	0.06148247
344.4	0.00474506		874.39	0.0074072		1404.39	0.04609041		1934.39	0.05047781		2464.38	0.00290078		2994.38	0.02929352		3524.37	0.0068331		4054.37	0.06138769
344.6	0.00412849		874.59	0.00666422		1404.59	0.0460026		1934.59	0.04956608		2464.58	0.00316099		2994.58	0.03010071		3524.57	0.00688679		4054.57	0.06160497
344.8	0.0039244		874.79	0.00562276		1404.79	0.04551885		1934.79	0.04911695		2464.78	0.00347291		2994.78	0.03019021		3524.77	0.00695593		4054.77	0.06272615
345	0.00391111		874.99	0.00642804		1404.99	0.04508841		1934.99	0.0490181		2464.98	0.00365629		2994.98	0.03067596		3524.97	0.00610621		4054.97	0.0633446
345.2	0.00297899		875.19	0.00532248		1405.19	0.04548983		1935.19	0.04976738		2465.18	0.00391574		2995.18	0.0307787		3525.17	0.00607135		4055.17	0.06365969
345.4	0.00262647		875.39	0.00574643		1405.39	0.04600432		1935.39	0.05000698		2465.38	0.00472485		2995.38	0.03007183		3525.37	0.00672222		4055.37	0.06436924
345.6	0.00289593		875.59	0.00582246		1405.59	0.0460524		1935.59	0.04955062		2465.58	0.00398571		2995.58	0.03074052		3525.57	0.00776247		4055.57	0.0637177
345.8	0.00315784		875.79	0.00689957		1405.79	0.04617748		1935.79	0.04957617		2465.78	0.0038727		2995.78	0.03072685		3525.77	0.00928377		4055.77	0.06422252
346	0.00307817		875.99	0.00769009		1405.99	0.04595837		1935.99	0.0509096		2465.98	0.00378916		2995.98	0.03022007		3525.97	0.01081021		4055.97	0.06452194
346.2	0.00339745		876.19	0.00761601		1406.19	0.04675956		1936.19	0.05095008		2466.18	0.00298613		2996.18	0.0291743		3526.17	0.01149104		4056.17	0.06441678
346.4	0.00430984		876.39	0.00909995		1406.39	0.04682287		1936.39	0.05085449		2466.38	0.00315382		2996.38	0.02839367		3526.37	0.01210551		4056.37	0.06485026
346.6	0.00437917		876.59	0.01040663		1406.59	0.04702335		1936.59	0.05152395		2466.58	0.00217947		2996.58	0.02813627		3526.57	0.0130176		4056.57	0.06426025
346.8	0.00494749		876.79	0.01090906		1406.79	0.04634947		1936.79	0.05110627		2466.78	0.00282967		2996.78	0.02801061		3526.77	0.01291724		4056.77	0.06380271
347	0.00540364		876.99	0.01147204		1406.99	0.04606226		1936.99	0.05164444		2466.98	0.00235105		2996.98	0.02786977		3526.97	0.01355383		4056.97	0.06316011
347.2	0.0061137		877.19	0.01100012		1407.19	0.04776569		1937.19	0.05182781		2467.18	0.00178514		2997.18	0.02798647		3527.17	0.01310012		4057.17	0.0630193
347.4	0.00634798		877.39	0.01142134		1407.39	0.04779656		1937.39	0.05134539		2467.38	0.00208558		2997.38	0.02762901		3527.37	0.01342534		4057.37	0.06263263
347.6	0.00694119		877.59	0.01152576		1407.59	0.04931359		1937.59	0.05128323		2467.58	0.0026631		2997.58	0.02760898		3527.57	0.01348161		4057.57	0.06332946
347.8	0.00669839		877.79	0.01223448		1407.79	0.04998005		1937.79	0.05088846		2467.78	0.00280493		2997.78	0.02696923		3527.77	0.01350604		4057.77	0.06298356
348	0.00596645		877.99	0.01240097		1407.99	0.0500721		1937.99	0.05024397		2467.98	0.00270467		2997.98	0.02684646		3527.97	0.01352922		4057.97	0.06290625
348.2	0.00632757		878.19	0.01238775		1408.19	0.05017826		1938.19	0.05035756		2468.18	0.00263708		2998.18	0.02675288		3528.17	0.01314097		4058.17	0.06241574
348.4	0.00586282		878.39	0.01177429		1408.39	0.05083145		1938.39	0.0501596		2468.38	0.00205919		2998.38	0.02824591		3528.37	0.01257058		4058.37	0.06324991
348.6	0.00593169		878.59	0.01130094		1408.59	0.05074355		1938.59	0.04980539		2468.58	0.00240758		2998.58	0.02924732		3528.57	0.01320248		4058.57	0.0636987
348.8	0.00529301		878.79	0.01100876		1408.79	0.05027203		1938.79	0.04959527		2468.78	0.0019411		2998.78	0.02980337		3528.77	0.01315015		4058.77	0.06445692
349	0.00558637		878.99	0.01153128		1408.99	0.04955521		1938.99	0.04881342		2468.98	0.00152294		2998.98	0.0299709		3528.97	0.01245529		4058.97	0.06502953
349.2	0.00486943		879.19	0.01007328		1409.19	0.0497872		1939.19	0.04911835		2469.18	0.00194746		2999.18	0.02913254		3529.17	0.01145123		4059.17	0.06590779
349.4	0.00387194		879.39	0.01014803		1409.39	0.04959366		1939.39	0.04937568		2469.38	0.00261974		2999.38	0.02891903		3529.37	0.01246788		4059.37	0.06515608
349.6	0.00320208		879.59	0.01003804		1409.59	0.04957133		1939.59	0.04857331		2469.58	0.00256236		2999.58	0.02938829		3529.57	0.01282246		4059.57	0.06482832
349.8	0.00327577		879.79	0.01014999		1409.79	0.04917144		1939.79	0.0489665		2469.78	0.0034818		2999.78	0.02883708		3529.77	0.01344545		4059.77	0.06525133
350	0.00370941		879.99	0.00991478		1409.99	0.04872508		1939.99	0.0490398		2469.98	0.00336232		2999.98	0.02806191		3529.97	0.01299968		4059.97	0.06531616
350.2	0.00457622		880.19	0.00937967		1410.19	0.0489984		1940.19	0.04832426		2470.18	0.00295217		3000.18	0.02816063		3530.17	0.01281834		4060.17	0.06645141
350.4	0.00443782		880.39	0.00958201		1410.39	0.04831906		1940.39	0.04767724		2470.38	0.00368427		3000.38	0.02857709		3530.37	0.01282032		4060.37	0.06664935
350.6	0.00461698		880.59	0.0096225		1410.59	0.04804006		1940.59	0.04855228		2470.58	0.00300856		3000.58	0.02914767		3530.57	0.01342923		4060.57	0.06693055
350.8	0.00513629		880.79	0.00855851		1410.79	0.04854961		1940.79	0.04937182		2470.78	0.00396182		3000.78	0.02939535		3530.77	0.01339155		4060.77	0.06657188
351	0.00549533		880.99	0.00786361		1410.99	0.04912246		1940.99	0.04900763		2470.98	0.00381947		3000.98	0.029622		3530.97	0.01407965		4060.97	0.06623774
351.2	0.00574936		881.19	0.00737571		1411.19	0.04966165		1941.19	0.04943942		2471.18	0.00422529		3001.18	0.02981873		3531.17	0.01342101		4061.17	0.06710895
351.4	0.00586359		881.39	0.00746855		1411.39	0.04992784		1941.39	0.0498164		2471.38	0.00555082		3001.38	0.0303909		3531.37	0.0143882		4061.37	0.06692389
351.6	0.00585956		881.59	0.00831627		1411.59	0.05007828		1941.59	0.04952525		2471.58	0.00543764		3001.58	0.03034139		3531.57	0.01438846		4061.57	0.06700675
351.8	0.00578211		881.79	0.00917023		1411.79	0.04982624		1941.79	0.04944206		2471.78	0.00507487		3001.78	0.03073592		3531.77	0.0145547		4061.77	0.06592812
352	0.00522769		881.99	0.0096275		1411.99	0.04913222		1941.99	0.04957096		2471.98	0.00441222		3001.98	0.03071488		3531.97	0.01435238		4061.97	0.06557052
352.2	0.00576549		882.19	0.01010802		1412.19	0.04847971		1942.19	0.05028528		2472.18	0.00419923		3002.18	0.03119278		3532.17	0.01297901		4062.17	0.06446276
352.4	0.00509196		882.39	0.01038283		1412.39	0.0486639		1942.39	0.0501004		2472.38	0.00309391		3002.38	0.03174623		3532.37	0.01261796		4062.37	0.06457784
352.6	0.00484091		882.59	0.01089519		1412.59	0.04882375		1942.59	0.04936482		2472.58	0.00259368		3002.58	0.03142235		3532.57	0.0122055		4062.57	0.06510274
352.8	0.00428917		882.79	0.0109677		1412.79	0.04837119		1942.79	0.04965014		2472.78	0.00138659		3002.78	0.03104603		3532.77	0.01140662		4062.77	0.06566673
353	0.0036798		882.99	0.01163134		1412.99	0.04776637		1942.99	0.05009691		2472.98	0.00087431		3002.98	0.03052131		3532.97	0.01067876		4062.97	0.06548567
353.2	0.00161044		883.19	0.0110299		1413.19	0.04696201		1943.19	0.05076936		2473.18	0.0008474		3003.18	0.03019197		3533.17	0.01001768		4063.17	0.06510511
353.4	-0.00029642		883.39	0.0114497		1413.39	0.04630311		1943.39	0.05098366		2473.38	0.00106486		3003.38	0.03088833		3533.37	0.01123652		4063.37	0.06417674
353.6	-0.00079966		883.59	0.01173551		1413.59	0.0463664		1943.59	0.05081801		2473.58	0.00179274		3003.58	0.03103894		3533.57	0.01182201		4063.57	0.06403162
353.8	-0.0003748		883.79	0.01134544		1413.79	0.04607727		1943.79	0.05154506		2473.78	0.00231918		3003.78	0.03065908		3533.77	0.01211685		4063.77	0.06492699
354	0.00020295		883.99	0.0102679		1413.99	0.04605931		1943.99	0.05188397		2473.98	0.00254686		3003.98	0.03018582		3533.97	0.01144396		4063.97	0.06558083
354.2	0.00034014		884.19	0.009529		1414.19	0.04692901		1944.19	0.05211294		2474.18	0.00269365		3004.18	0.03009473		3534.17	0.01174438		4064.17	0.06605649
354.4	0.00074716		884.39	0.00896856		1414.39	0.04696671		1944.39	0.05251227		2474.38	0.00333607		3004.38	0.02955174		3534.37	0.01104824		4064.37	0.06619896
354.6	0.00191878		884.59	0.00781793		1414.59	0.04719372		1944.59	0.05343946		2474.58	0.0036035		3004.58	0.0299023		3534.57	0.0107763		4064.57	0.06690093
354.8	0.00256862		884.79	0.00712304		1414.79	0.04692505		1944.79	0.05343979		2474.78	0.00487018		3004.78	0.02940077		3534.77	0.01108169		4064.77	0.06720384
355	0.00383338		884.99	0.00792229		1414.99	0.0468317		1944.99	0.05260053		2474.98	0.00511731		3004.98	0.02891173		3534.97	0.01079337		4064.97	0.06809576
355.2	0.00440749		885.19	0.00710601		1415.19	0.0470367		1945.19	0.05269271		2475.18	0.00572345		3005.18	0.02893529		3535.17	0.01094995		4065.17	0.06859575
355.4	0.00516132		885.39	0.00727038		1415.39	0.04724251		1945.39	0.05225724		2475.38	0.00536095		3005.38	0.02939157		3535.37	0.01153321		4065.37	0.0674484
355.6	0.00514912		885.59	0.00800484		1415.59	0.04722247		1945.59	0.05143538		2475.58	0.00478769		3005.58	0.0284811		3535.57	0.01092588		4065.57	0.06756638
355.8	0.00605869		885.79	0.00774264		1415.79	0.04773378		1945.79	0.05156303		2475.78	0.00474022		3005.78	0.02910674		3535.77	0.01125481		4065.77	0.06757085
356	0.00640835		885.99	0.00738757		1415.99	0.04788004		1945.99	0.0518896		2475.98	0.0045628		3005.98	0.029084		3535.97	0.01109809		4065.97	0.06772857
356.2	0.00687481		886.19	0.00743782		1416.19	0.04879443		1946.19	0.05172879		2476.18	0.00500813		3006.18	0.02915938		3536.17	0.01076984		4066.17	0.06737897
356.4	0.00654572		886.39	0.00746219		1416.39	0.05011441		1946.39	0.05145153		2476.38	0.00430544		3006.38	0.02906113		3536.37	0.01121355		4066.37	0.06828157
356.6	0.00629069		886.59	0.00736851		1416.59	0.05170517		1946.59	0.05181555		2476.58	0.00422419		3006.58	0.02999477		3536.57	0.01124978		4066.57	0.06812938
356.8	0.0064474		886.79	0.00710489		1416.79	0.0520153		1946.79	0.05248531		2476.78	0.00377338		3006.78	0.03013227		3536.77	0.01159205		4066.77	0.06774578
357	0.00548672		886.99	0.00784892		1416.99	0.05232099		1946.99	0.05241843		2476.98	0.00402308		3006.98	0.03003291		3536.97	0.01202253		4066.97	0.06744302
357.2	0.0048919		887.19	0.00744407		1417.19	0.05211592		1947.19	0.05291182		2477.18	0.00438228		3007.18	0.03088045		3537.17	0.01252408		4067.17	0.06731582
357.4	0.00458965		887.39	0.00764434		1417.39	0.05259928		1947.39	0.05337606		2477.38	0.00504262		3007.38	0.0314203		3537.37	0.0139628		4067.37	0.06704614
357.6	0.00448132		887.59	0.00813948		1417.59	0.05235356		1947.59	0.05424526		2477.58	0.0058674		3007.58	0.03193565		3537.57	0.01393937		4067.57	0.06701309
357.8	0.00487966		887.79	0.00837768		1417.79	0.05276367		1947.79	0.05475842		2477.78	0.00587209		3007.78	0.03166525		3537.77	0.01443317		4067.77	0.06754307
358	0.00539658		887.99	0.00887931		1417.99	0.05218907		1947.99	0.05543084		2477.98	0.00622821		3007.98	0.03214565		3537.97	0.01384694		4067.97	0.06701752
358.2	0.00546875		888.19	0.00991687		1418.19	0.05261957		1948.19	0.05533678		2478.18	0.0063283		3008.18	0.03229981		3538.17	0.01348823		4068.17	0.06716552
358.4	0.00719649		888.39	0.0106708		1418.39	0.05138001		1948.39	0.05506279		2478.38	0.00631992		3008.38	0.03207022		3538.37	0.0124295		4068.37	0.06713092
358.6	0.00716128		888.59	0.01103369		1418.59	0.05093322		1948.59	0.05444814		2478.58	0.00719003		3008.58	0.03246355		3538.57	0.0125012		4068.57	0.0675235
358.8	0.00787972		888.79	0.01097874		1418.79	0.05010578		1948.79	0.05390279		2478.78	0.00729557		3008.78	0.03184234		3538.77	0.01208754		4068.77	0.06762086
359	0.00877622		888.99	0.01068734		1418.99	0.04998366		1948.99	0.05302439		2478.98	0.00631219		3008.98	0.03150497		3538.97	0.01146903		4068.97	0.0668035
359.2	0.00981327		889.19	0.01001841		1419.19	0.04983129		1949.19	0.05263645		2479.18	0.00656441		3009.18	0.03199637		3539.17	0.01125607		4069.17	0.06552449
359.4	0.01080378		889.39	0.01022634		1419.39	0.04875968		1949.39	0.05257352		2479.38	0.00619048		3009.38	0.03180115		3539.37	0.01195494		4069.37	0.06549742
359.6	0.01095433		889.59	0.01048632		1419.59	0.04846817		1949.59	0.05135688		2479.58	0.00619925		3009.58	0.03201517		3539.57	0.01255027		4069.57	0.06649561
359.8	0.01158749		889.79	0.01027424		1419.79	0.0483921		1949.79	0.05212302		2479.78	0.00593591		3009.78	0.03245252		3539.77	0.01247264		4069.77	0.06567827
360	0.01175358		889.99	0.0106579		1419.99	0.04830131		1949.99	0.05201085		2479.98	0.00628509		3009.98	0.03144368		3539.97	0.01300384		4069.97	0.06490841
360.2	0.01096879		890.19	0.01095457		1420.19	0.04806753		1950.19	0.05176783		2480.18	0.00619788		3010.18	0.02948032		3540.17	0.01365621		4070.17	0.0652025
360.4	0.01120737		890.39	0.01072046		1420.39	0.04876593		1950.39	0.05173622		2480.38	0.0057518		3010.38	0.02901632		3540.37	0.01357355		4070.37	0.06556976
360.6	0.01096302		890.59	0.01031379		1420.59	0.04902368		1950.59	0.05181579		2480.58	0.00608757		3010.58	0.02911501		3540.57	0.0129937		4070.57	0.06600974
360.8	0.0110406		890.79	0.01056437		1420.79	0.04929278		1950.79	0.0513976		2480.78	0.00638113		3010.78	0.02901119		3540.77	0.01312968		4070.77	0.06747603
361	0.01039013		890.99	0.00966772		1420.99	0.04954762		1950.99	0.05117667		2480.98	0.00626258		3010.98	0.02929756		3540.97	0.01349338		4070.97	0.0677393
361.2	0.01004439		891.19	0.00877785		1421.19	0.04926351		1951.19	0.05173648		2481.18	0.00644131		3011.18	0.0296096		3541.17	0.01417178		4071.17	0.06800652
361.4	0.0097166		891.39	0.00922731		1421.39	0.04899132		1951.39	0.05234601		2481.38	0.00609078		3011.38	0.03013228		3541.37	0.01445329		4071.37	0.06823544
361.6	0.00961593		891.59	0.00953084		1421.59	0.04824079		1951.59	0.05270984		2481.58	0.00701426		3011.58	0.03063664		3541.57	0.01410581		4071.57	0.06870263
361.8	0.00922237		891.79	0.00983622		1421.79	0.04823604		1951.79	0.05303641		2481.78	0.00721631		3011.78	0.03124644		3541.77	0.01478346		4071.77	0.06970907
362	0.00949489		891.99	0.00982895		1421.99	0.04866531		1951.99	0.05327226		2481.98	0.00736933		3011.98	0.0316563		3541.97	0.01395149		4071.97	0.06983415
362.2	0.01004519		892.19	0.00991687		1422.19	0.04925022		1952.19	0.05294407		2482.18	0.00752329		3012.18	0.0314517		3542.17	0.01400963		4072.17	0.07051182
362.4	0.00989389		892.39	0.00887541		1422.39	0.04904445		1952.39	0.05284475		2482.38	0.00676704		3012.38	0.03199985		3542.37	0.01388044		4072.37	0.07020846
362.6	0.00924147		892.59	0.00823055		1422.59	0.0499919		1952.59	0.05262687		2482.58	0.0073296		3012.58	0.03172032		3542.57	0.01403539		4072.57	0.07027637
362.8	0.01024317		892.79	0.00733297		1422.79	0.05072412		1952.79	0.05191358		2482.78	0.00713072		3012.78	0.03210461		3542.77	0.01395334		4072.77	0.06989
363	0.01021783		892.99	0.0069849		1422.99	0.05118458		1952.99	0.05137317		2482.98	0.00665136		3012.98	0.03226117		3542.97	0.01380174		4072.97	0.06848574
363.2	0.00977608		893.19	0.0060035		1423.19	0.05065354		1953.19	0.05149687		2483.18	0.00643281		3013.18	0.03219041		3543.17	0.01405222		4073.17	0.06847414
363.4	0.00979563		893.39	0.00625916		1423.39	0.05083033		1953.39	0.05145324		2483.38	0.00533927		3013.38	0.03147396		3543.37	0.01450335		4073.37	0.0691778
363.6	0.00881002		893.59	0.00677434		1423.59	0.05121336		1953.59	0.05101732		2483.58	0.00438542		3013.58	0.03125172		3543.57	0.0139903		4073.57	0.06846291
363.8	0.00830608		893.79	0.00682428		1423.79	0.05142416		1953.79	0.05247317		2483.78	0.00394503		3013.78	0.0304306		3543.77	0.01337007		4073.77	0.06753918
364	0.00756707		893.99	0.00686303		1423.99	0.05100392		1953.99	0.0520544		2483.98	0.00364758		3013.98	0.02892543		3543.97	0.01357009		4073.97	0.06777695
364.2	0.00691315		894.19	0.00680198		1424.19	0.05065396		1954.19	0.05216863		2484.18	0.00304972		3014.18	0.02902369		3544.17	0.0135377		4074.17	0.06846856
364.4	0.0065034		894.39	0.00627349		1424.39	0.05091553		1954.39	0.05285127		2484.38	0.00323106		3014.38	0.02986769		3544.37	0.01270034		4074.37	0.06780382
364.6	0.00593871		894.59	0.00625107		1424.59	0.05035251		1954.59	0.0524222		2484.58	0.00354326		3014.58	0.03048615		3544.57	0.01253485		4074.57	0.06839091
364.8	0.00538643		894.79	0.00744106		1424.79	0.05061858		1954.79	0.05233714		2484.78	0.00381735		3014.78	0.0320326		3544.77	0.01323533		4074.77	0.0689126
365	0.0053401		894.99	0.00761347		1424.99	0.05038736		1954.99	0.05230302		2484.98	0.00325157		3014.98	0.03317035		3544.97	0.01324783		4074.97	0.06868782
365.2	0.00541055		895.19	0.00853577		1425.19	0.05012694		1955.19	0.0528355		2485.18	0.00387823		3015.18	0.03323556		3545.17	0.01312458		4075.17	0.06853895
365.4	0.00639918		895.39	0.01006277		1425.39	0.04940196		1955.39	0.05360466		2485.38	0.00448994		3015.38	0.03415356		3545.37	0.01301229		4075.37	0.06946859
365.6	0.00687766		895.59	0.01084886		1425.59	0.04853419		1955.59	0.05350184		2485.58	0.00530052		3015.58	0.03401374		3545.57	0.0126039		4075.57	0.07052783
365.8	0.00705891		895.79	0.0119386		1425.79	0.04817978		1955.79	0.0539056		2485.78	0.00471041		3015.78	0.03509557		3545.77	0.01282248		4075.77	0.0704275
366	0.00738507		895.99	0.01157509		1425.99	0.04833478		1955.99	0.05437195		2485.98	0.0046552		3015.98	0.03504058		3545.97	0.01350069		4075.97	0.07007407
366.2	0.00755659		896.19	0.01194117		1426.19	0.04775665		1956.19	0.0547668		2486.18	0.00498012		3016.18	0.03562953		3546.17	0.01388387		4076.17	0.07074898
366.4	0.00772883		896.39	0.01071732		1426.39	0.04761469		1956.39	0.05474344		2486.38	0.00505237		3016.38	0.03640564		3546.37	0.01378517		4076.37	0.0709485
366.6	0.00853534		896.59	0.01141111		1426.59	0.04853247		1956.59	0.05408308		2486.58	0.00556847		3016.58	0.03557017		3546.57	0.01416824		4076.57	0.07153036
366.8	0.00817284		896.79	0.01074578		1426.79	0.04897983		1956.79	0.05347462		2486.78	0.00558365		3016.78	0.03570391		3546.77	0.01464863		4076.77	0.07168367
367	0.00887696		896.99	0.00951471		1426.99	0.04894617		1956.99	0.05370333		2486.98	0.00489376		3016.98	0.03443381		3546.97	0.01436814		4076.97	0.07162592
367.2	0.0092636		897.19	0.00891184		1427.19	0.04894278		1957.19	0.05310334		2487.18	0.00456219		3017.18	0.03336139		3547.17	0.01511252		4077.17	0.0723309
367.4	0.01016938		897.39	0.00934138		1427.39	0.04999219		1957.39	0.05309637		2487.38	0.00428555		3017.38	0.03339884		3547.37	0.01538653		4077.37	0.07272054
367.6	0.00948847		897.59	0.0084731		1427.59	0.05019336		1957.59	0.0530684		2487.58	0.00447023		3017.58	0.03279256		3547.57	0.01497209		4077.57	0.07203603
367.8	0.00911381		897.79	0.00787732		1427.79	0.0502738		1957.79	0.05281502		2487.78	0.00516613		3017.78	0.03189829		3547.77	0.01590354		4077.77	0.07217169
368	0.00922109		897.99	0.00737072		1427.99	0.05046192		1957.99	0.05231869		2487.98	0.00524866		3017.98	0.03144788		3547.97	0.01589059		4077.97	0.07167048
368.2	0.0090273		898.19	0.00660624		1428.19	0.05066552		1958.19	0.05226255		2488.18	0.00551464		3018.18	0.03194029		3548.17	0.01621305		4078.17	0.07123597
368.4	0.00838553		898.39	0.00687929		1428.39	0.05129595		1958.39	0.05299308		2488.38	0.0061334		3018.38	0.03107384		3548.37	0.01626731		4078.37	0.07093745
368.6	0.00886615		898.59	0.00755761		1428.59	0.05118466		1958.59	0.05196459		2488.58	0.00633488		3018.58	0.0308652		3548.57	0.01673614		4078.57	0.07149991
368.8	0.0078572		898.79	0.00863009		1428.79	0.05199797		1958.79	0.05269364		2488.78	0.00636716		3018.78	0.03075022		3548.77	0.01708174		4078.77	0.07175221
369	0.0077535		898.99	0.00879899		1428.99	0.05167403		1958.99	0.0533273		2488.98	0.00574182		3018.98	0.02995813		3548.97	0.01692935		4078.97	0.07241903
369.2	0.0077397		899.19	0.00954759		1429.19	0.05136455		1959.19	0.05348526		2489.18	0.00614002		3019.18	0.02935839		3549.17	0.01580194		4079.17	0.07238631
369.4	0.00805972		899.39	0.00984999		1429.39	0.05054814		1959.39	0.0543065		2489.38	0.00584883		3019.38	0.02929437		3549.37	0.01505954		4079.37	0.07223126
369.6	0.00838138		899.59	0.01016253		1429.59	0.0508686		1959.59	0.05448861		2489.58	0.00505882		3019.58	0.02957158		3549.57	0.01458519		4079.57	0.07242885
369.8	0.00902795		899.79	0.00953671		1429.79	0.05049803		1959.79	0.05500343		2489.78	0.00443269		3019.78	0.02974752		3549.77	0.01506127		4079.77	0.07195426
370	0.00903538		899.99	0.00909984		1429.99	0.05020182		1959.99	0.0557415		2489.98	0.00480497		3019.98	0.02958051		3549.97	0.01477615		4079.97	0.07228194
370.2	0.010019		900.19	0.00924776		1430.19	0.05014148		1960.19	0.05543924		2490.18	0.00564815		3020.18	0.02997605		3550.17	0.01428472		4080.17	0.07378438
370.4	0.01125069		900.39	0.00827867		1430.39	0.05015551		1960.39	0.05533493		2490.38	0.00555189		3020.38	0.02985213		3550.37	0.01394331		4080.37	0.07409397
370.6	0.01124248		900.59	0.00859394		1430.59	0.05130781		1960.59	0.0554649		2490.58	0.0053338		3020.58	0.03004382		3550.57	0.01388773		4080.57	0.07397536
370.8	0.01176745		900.79	0.00789673		1430.79	0.05170962		1960.79	0.05584606		2490.78	0.00580942		3020.78	0.03035891		3550.77	0.01417535		4080.77	0.07453701
371	0.01285633		900.99	0.00712854		1430.99	0.05172889		1960.99	0.0551943		2490.98	0.0056245		3020.98	0.03030281		3550.97	0.01391697		4080.97	0.07462995
371.2	0.01378814		901.19	0.00722786		1431.19	0.0519477		1961.19	0.05408806		2491.18	0.00632408		3021.18	0.03140666		3551.17	0.01476849		4081.17	0.07416469
371.4	0.01383103		901.39	0.00719822		1431.39	0.05228246		1961.39	0.05374967		2491.38	0.00686252		3021.38	0.03293936		3551.37	0.01447758		4081.37	0.07476095
371.6	0.01382662		901.59	0.00652799		1431.59	0.05203045		1961.59	0.05252665		2491.58	0.00715587		3021.58	0.03264475		3551.57	0.01489252		4081.57	0.07459418
371.8	0.01371284		901.79	0.00723854		1431.79	0.05261899		1961.79	0.05289791		2491.78	0.00826751		3021.78	0.03317853		3551.77	0.01580237		4081.77	0.07533201
372	0.01348906		901.99	0.00656801		1431.99	0.05279995		1961.99	0.05300792		2491.98	0.00807046		3021.98	0.03283375		3551.97	0.01578062		4081.97	0.0751983
372.2	0.01200774		902.19	0.00606793		1432.19	0.05240563		1962.19	0.05376223		2492.18	0.00796817		3022.18	0.03265014		3552.17	0.01562566		4082.17	0.07522764
372.4	0.01047204		902.39	0.00688016		1432.39	0.05307915		1962.39	0.05458976		2492.38	0.00848335		3022.38	0.03247402		3552.37	0.01579368		4082.37	0.07458419
372.6	0.01001771		902.59	0.00702495		1432.59	0.05227918		1962.59	0.05527455		2492.58	0.00872561		3022.58	0.03229797		3552.57	0.01624344		4082.57	0.07482916
372.8	0.007817		902.79	0.00682968		1432.79	0.05266711		1962.79	0.05625154		2492.78	0.0086464		3022.78	0.03244697		3552.77	0.01681702		4082.77	0.07566396
373	0.00794473		902.99	0.0075457		1432.99	0.05244317		1962.99	0.0564387		2492.98	0.00864424		3022.98	0.03261972		3552.97	0.01679521		4082.97	0.07635641
373.2	0.00754037		903.19	0.00761208		1433.19	0.05241679		1963.19	0.05667333		2493.18	0.00856583		3023.18	0.03272624		3553.17	0.01578935		4083.17	0.0758702
373.4	0.00766095		903.39	0.00794685		1433.39	0.05220124		1963.39	0.0571191		2493.38	0.00791838		3023.38	0.03243575		3553.37	0.01538331		4083.37	0.07613127
373.6	0.00843841		903.59	0.00776183		1433.59	0.05278205		1963.59	0.05724118		2493.58	0.00741816		3023.58	0.03280417		3553.57	0.01564948		4083.57	0.07747618
373.8	0.0086462		903.79	0.00822509		1433.79	0.05236875		1963.79	0.05727968		2493.78	0.00756076		3023.78	0.03199307		3553.77	0.01648744		4083.77	0.07805741
374	0.00845291		903.99	0.00903811		1433.99	0.05275077		1963.99	0.05715689		2493.98	0.00821749		3023.98	0.03194425		3553.97	0.01611641		4083.97	0.07866093
374.2	0.00881832		904.19	0.00931731		1434.19	0.05227086		1964.19	0.05620061		2494.18	0.00843376		3024.18	0.03153954		3554.17	0.01610027		4084.17	0.07930097
374.4	0.00873517		904.39	0.00914662		1434.39	0.05223347		1964.39	0.05656641		2494.38	0.00756322		3024.38	0.03129541		3554.37	0.01613681		4084.37	0.07849799
374.6	0.00830736		904.59	0.00905807		1434.59	0.0521127		1964.59	0.05608689		2494.58	0.00707388		3024.58	0.03130304		3554.57	0.01605343		4084.57	0.07836719
374.8	0.00815795		904.79	0.00833216		1434.79	0.05214863		1964.79	0.05591746		2494.78	0.00688582		3024.78	0.03135639		3554.77	0.01604863		4084.77	0.07925804
375	0.00862256		904.99	0.00722586		1434.99	0.05173501		1964.99	0.05527994		2494.98	0.00614276		3024.98	0.03121126		3554.97	0.01653329		4084.97	0.07795972
375.2	0.00946733		905.19	0.00744743		1435.19	0.05151391		1965.19	0.05460775		2495.18	0.00576073		3025.18	0.03167709		3555.17	0.0169902		4085.17	0.07779097
375.4	0.00928233		905.39	0.00782785		1435.39	0.05090257		1965.39	0.05392116		2495.38	0.00564284		3025.38	0.03187772		3555.37	0.01669711		4085.37	0.07825209
375.6	0.00883683		905.59	0.00718811		1435.59	0.05047057		1965.59	0.05450017		2495.58	0.0051609		3025.58	0.03207018		3555.57	0.01628622		4085.57	0.07769594
375.8	0.00810286		905.79	0.00751795		1435.79	0.05121784		1965.79	0.05562432		2495.78	0.00577782		3025.78	0.0318718		3555.77	0.01534091		4085.77	0.07782755
376	0.00728682		905.99	0.00665702		1435.99	0.05067774		1965.99	0.05544467		2495.98	0.00548849		3025.98	0.03067489		3555.97	0.01439444		4085.97	0.07737673
376.2	0.00603652		906.19	0.00606216		1436.19	0.05000388		1966.19	0.05684697		2496.18	0.00558365		3026.18	0.03176945		3556.17	0.01430672		4086.17	0.07673452
376.4	0.00545039		906.39	0.00661583		1436.39	0.05074698		1966.39	0.05798876		2496.38	0.00613457		3026.38	0.03207352		3556.37	0.01471003		4086.37	0.07564365
376.6	0.00546824		906.59	0.00699507		1436.59	0.0496411		1966.59	0.05956979		2496.58	0.00689276		3026.58	0.03189634		3556.57	0.01530742		4086.57	0.07664181
376.8	0.00488272		906.79	0.0070935		1436.79	0.05021958		1966.79	0.05925498		2496.78	0.00637015		3026.78	0.03241178		3556.77	0.0153753		4086.77	0.07713771
377	0.00559053		906.99	0.00889316		1436.99	0.05039977		1966.99	0.05957017		2496.98	0.00688244		3026.98	0.0326283		3556.97	0.01525644		4086.97	0.07790631
377.2	0.00561793		907.19	0.00902339		1437.19	0.05123844		1967.19	0.060315		2497.18	0.00664107		3027.18	0.03289285		3557.17	0.01517376		4087.17	0.07736152
377.4	0.00607282		907.39	0.00973433		1437.39	0.05118564		1967.39	0.06019541		2497.38	0.00609655		3027.38	0.03368435		3557.37	0.01523684		4087.37	0.07815889
377.6	0.0063746		907.59	0.00978727		1437.59	0.05209586		1967.59	0.05991654		2497.58	0.00628021		3027.58	0.03470446		3557.57	0.0161489		4087.57	0.07798901
377.8	0.00635882		907.79	0.01075647		1437.79	0.05219288		1967.79	0.05937123		2497.78	0.00730449		3027.78	0.03498611		3557.77	0.0167333		4087.77	0.07845168
378	0.0064214		907.99	0.01067324		1437.99	0.05224266		1967.99	0.05874765		2497.98	0.00763287		3027.98	0.03530788		3557.97	0.0164618		4087.97	0.07865693
378.2	0.00652268		908.19	0.01065065		1438.19	0.05165111		1968.19	0.05776351		2498.18	0.00750452		3028.18	0.03544505		3558.17	0.01667055		4088.17	0.07875093
378.4	0.00658789		908.39	0.01004826		1438.39	0.05206963		1968.39	0.05750425		2498.38	0.00725328		3028.38	0.03555062		3558.37	0.01695017		4088.37	0.07879711
378.6	0.00673379		908.59	0.00953494		1438.59	0.05232712		1968.59	0.05663995		2498.58	0.0071864		3028.58	0.03567748		3558.57	0.0167021		4088.57	0.07915282
378.8	0.00711598		908.79	0.00896776		1438.79	0.05310704		1968.79	0.05628574		2498.78	0.00709814		3028.78	0.03633284		3558.77	0.01674795		4088.77	0.07909036
379	0.00796456		908.99	0.0087075		1438.99	0.05326523		1968.99	0.05541944		2498.98	0.00671753		3028.98	0.03618545		3558.97	0.01691868		4088.97	0.07829169
379.2	0.0084039		909.19	0.00909311		1439.19	0.05353206		1969.19	0.05445909		2499.18	0.00626947		3029.18	0.03639029		3559.17	0.01616396		4089.17	0.07850506
379.4	0.00878059		909.39	0.00898085		1439.39	0.05379162		1969.39	0.05393617		2499.38	0.00629904		3029.38	0.03655211		3559.37	0.01540774		4089.37	0.07843044
379.6	0.00874873		909.59	0.00839146		1439.59	0.05440967		1969.59	0.05375931		2499.58	0.00609495		3029.58	0.03654374		3559.57	0.0141314		4089.57	0.0783366
379.8	0.00937375		909.79	0.00833199		1439.79	0.05530643		1969.79	0.0532475		2499.78	0.00605053		3029.78	0.03598315		3559.77	0.01362703		4089.77	0.07860391
380	0.00937375		909.99	0.00833199		1439.99	0.05530643		1969.98	0.0532475		2499.98	0.00605053		3029.97	0.03598315		3559.97	0.01362703		4089.97	0.07860391
380.2	0.00989409		910.19	0.00841275		1440.19	0.05554497		1970.18	0.05347781		2500.18	0.00626425		3030.17	0.0361115		3560.17	0.01345161		4090.17	0.07855785
380.4	0.01023583		910.39	0.00858319		1440.39	0.05587685		1970.38	0.05399418		2500.38	0.00597923		3030.37	0.03667623		3560.37	0.01363021		4090.37	0.0789717
380.6	0.010477		910.59	0.00791036		1440.59	0.05656672		1970.58	0.05485012		2500.58	0.00649665		3030.57	0.03671492		3560.57	0.01369446		4090.57	0.07951262
380.8	0.01112128		910.79	0.00800053		1440.79	0.0567068		1970.78	0.05554846		2500.78	0.00727899		3030.77	0.03773835		3560.77	0.01392585		4090.77	0.07994354
381	0.01121711		910.99	0.00755891		1440.99	0.05623284		1970.98	0.05570986		2500.98	0.0078155		3030.97	0.03808732		3560.97	0.01398105		4090.97	0.08020597
381.2	0.0112582		911.19	0.00778672		1441.19	0.05648525		1971.18	0.05548299		2501.18	0.0086581		3031.17	0.03870319		3561.17	0.0138248		4091.17	0.08004063
381.4	0.01182613		911.39	0.00793271		1441.39	0.05612789		1971.38	0.05572227		2501.38	0.00911099		3031.37	0.03850123		3561.37	0.01416952		4091.37	0.08034427
381.6	0.0115485		911.59	0.00814484		1441.59	0.0558344		1971.58	0.05605125		2501.58	0.00945924		3031.57	0.03864506		3561.57	0.01482732		4091.57	0.0809006
381.8	0.01142061		911.79	0.00762337		1441.79	0.05568166		1971.78	0.05596784		2501.78	0.01023654		3031.77	0.03903329		3561.77	0.01567997		4091.77	0.08121767
382	0.01139632		911.99	0.00729515		1441.99	0.0550311		1971.98	0.05619352		2501.98	0.01180056		3031.97	0.03890906		3561.97	0.01553404		4091.97	0.08116144
382.2	0.00974406		912.19	0.00685194		1442.19	0.05547484		1972.18	0.05619853		2502.18	0.0135967		3032.17	0.03936111		3562.17	0.01531528		4092.17	0.08108897
382.4	0.00928393		912.39	0.00712767		1442.39	0.05475516		1972.38	0.05652567		2502.38	0.01409623		3032.37	0.039453		3562.37	0.01589975		4092.37	0.08193007
382.6	0.00887897		912.59	0.00731138		1442.59	0.05449244		1972.58	0.05702517		2502.58	0.01386202		3032.57	0.03970498		3562.57	0.01663074		4092.57	0.08286993
382.8	0.0091228		912.79	0.00847983		1442.79	0.05477954		1972.78	0.05778763		2502.78	0.01351991		3032.77	0.03951882		3562.77	0.01685295		4092.77	0.08333942
383	0.00861114		912.99	0.00786651		1442.99	0.05509105		1972.98	0.05818854		2502.98	0.01353868		3032.97	0.04005209		3562.97	0.01662767		4092.97	0.08445496
383.2	0.00911807		913.19	0.00803034		1443.19	0.05524076		1973.18	0.05808132		2503.18	0.01324298		3033.17	0.0412443		3563.17	0.0176858		4093.17	0.08562378
383.4	0.00984568		913.39	0.00720389		1443.39	0.05562702		1973.38	0.05846534		2503.38	0.01358748		3033.37	0.04132138		3563.37	0.01801771		4093.37	0.0864654
383.6	0.00959308		913.59	0.00638382		1443.59	0.05508507		1973.58	0.05812201		2503.58	0.01360625		3033.57	0.04165758		3563.57	0.01779873		4093.57	0.08692615
383.8	0.00924933		913.79	0.00561667		1443.79	0.05531183		1973.78	0.05789121		2503.78	0.01315636		3033.77	0.04224846		3563.77	0.01842177		4093.77	0.08770295
384	0.00968399		913.99	0.00516417		1443.99	0.05625877		1973.98	0.05877776		2503.98	0.01341992		3033.97	0.04293272		3563.97	0.01906514		4093.97	0.08716105
384.2	0.00961158		914.19	0.00496407		1444.19	0.05680786		1974.18	0.05830703		2504.18	0.01302787		3034.17	0.04291758		3564.17	0.01865078		4094.17	0.08747074
384.4	0.00969358		914.39	0.00453453		1444.39	0.05718332		1974.38	0.05848672		2504.38	0.01256101		3034.37	0.04246187		3564.37	0.01973227		4094.37	0.08836293
384.6	0.00962353		914.59	0.00402383		1444.59	0.05691175		1974.58	0.05909467		2504.58	0.01327712		3034.57	0.04169781		3564.57	0.01963642		4094.57	0.08854863
384.8	0.01022512		914.79	0.00424937		1444.79	0.05678575		1974.78	0.05904488		2504.78	0.01419361		3034.77	0.04226443		3564.77	0.01991224		4094.77	0.08814247
385	0.01096505		914.99	0.00467675		1444.99	0.05628455		1974.98	0.05927669		2504.98	0.01446141		3034.97	0.04145223		3564.97	0.01998537		4094.97	0.08807311
385.2	0.01148372		915.19	0.00526601		1445.19	0.0566767		1975.18	0.05857196		2505.18	0.01435354		3035.17	0.04072031		3565.17	0.01989511		4095.17	0.08774495
385.4	0.01314756		915.39	0.00520383		1445.39	0.05598544		1975.38	0.05936673		2505.38	0.01392049		3035.37	0.03942023		3565.37	0.02070649		4095.37	0.0876186
385.6	0.01305884		915.59	0.00531722		1445.59	0.05558084		1975.58	0.05914646		2505.58	0.01341446		3035.57	0.03924621		3565.57	0.02090621		4095.57	0.08737706
385.8	0.01381275		915.79	0.00453549		1445.79	0.0561852		1975.78	0.0596298		2505.78	0.01392611		3035.77	0.03893589		3565.77	0.0207901		4095.77	0.08682953
386	0.01402218		915.99	0.00534016		1445.99	0.05603327		1975.98	0.0602832		2505.98	0.01448686		3035.97	0.03868095		3565.97	0.02045158		4095.97	0.08610931
386.2	0.01296341		916.19	0.006172		1446.19	0.05686221		1976.18	0.06144714		2506.18	0.01431767		3036.17	0.03980238		3566.17	0.02023778		4096.17	0.0860885
386.4	0.01370318		916.39	0.00774666		1446.39	0.0562515		1976.38	0.06209605		2506.38	0.01374527		3036.37	0.04029262		3566.37	0.02001625		4096.37	0.08590276
386.6	0.01408137		916.59	0.00815284		1446.59	0.05566086		1976.58	0.06271197		2506.58	0.01311176		3036.57	0.04133878		3566.57	0.02000511		4096.57	0.08599764
386.8	0.0141639		916.79	0.00832735		1446.79	0.0555471		1976.78	0.06260104		2506.78	0.01235619		3036.77	0.04124297		3566.77	0.01986489		4096.77	0.08576781
387	0.01378363		916.99	0.00760548		1446.99	0.0562158		1976.98	0.06276811		2506.98	0.01197615		3036.97	0.04187085		3566.97	0.01941831		4096.97	0.08638612
387.2	0.01307903		917.19	0.00812904		1447.19	0.05645365		1977.18	0.06303965		2507.18	0.01184323		3037.17	0.04275789		3567.17	0.01916797		4097.17	0.08628055
387.4	0.01269997		917.39	0.00763259		1447.39	0.05721194		1977.38	0.06338563		2507.38	0.01233897		3037.37	0.04389896		3567.37	0.019026		4097.37	0.08642315
387.6	0.0110802		917.59	0.0073036		1447.59	0.05725611		1977.58	0.06306541		2507.58	0.01186013		3037.57	0.04416452		3567.57	0.01934471		4097.57	0.08657114
387.8	0.01048016		917.79	0.00658878		1447.79	0.05788693		1977.78	0.06287897		2507.78	0.01251619		3037.77	0.0453375		3567.77	0.01926801		4097.77	0.08673213
388	0.01084699		917.99	0.00587803		1447.99	0.0585373		1977.98	0.06245328		2507.98	0.01302199		3037.97	0.0459356		3567.97	0.01987402		4097.97	0.08623543
388.2	0.01002711		918.19	0.00603856		1448.19	0.05827242		1978.18	0.06181872		2508.18	0.01382542		3038.17	0.04527845		3568.17	0.02028406		4098.17	0.08723742
388.4	0.00915966		918.39	0.00621118		1448.39	0.05764812		1978.38	0.06222656		2508.38	0.01498432		3038.37	0.04471462		3568.37	0.0204748		4098.37	0.08764329
388.6	0.00859028		918.59	0.00612008		1448.59	0.05742873		1978.58	0.06257806		2508.58	0.01608226		3038.57	0.04500512		3568.57	0.0201943		4098.57	0.08767394
388.8	0.00870188		918.79	0.00646697		1448.79	0.0582981		1978.78	0.06201631		2508.78	0.01732367		3038.77	0.04482549		3568.77	0.02004154		4098.77	0.08815478
389	0.00976361		918.99	0.00740938		1448.99	0.05850228		1978.98	0.06197304		2508.98	0.01764157		3038.97	0.04385014		3568.97	0.01902625		4098.97	0.08870934
389.2	0.00971983		919.19	0.00612055		1449.19	0.05857705		1979.18	0.06050808		2509.18	0.01688534		3039.17	0.04353102		3569.17	0.01864953		4099.17	0.08835617
389.4	0.0112807		919.39	0.00597586		1449.39	0.05851159		1979.38	0.06076414		2509.38	0.01724531		3039.37	0.04276873		3569.37	0.01770951		4099.37	0.08743094
389.6	0.01110516		919.59	0.00621571		1449.59	0.05905095		1979.58	0.05960325		2509.58	0.01675725		3039.57	0.04272611		3569.57	0.01727556		4099.57	0.08770957
389.8	0.0114698		919.79	0.00661435		1449.79	0.05938399		1979.78	0.05930119		2509.78	0.01689508		3039.77	0.04266319		3569.77	0.01740209		4099.77	0.08793475
390	0.01200802		919.99	0.00736993		1449.99	0.05914642		1979.98	0.0590812		2509.98	0.01650523		3039.97	0.04272855		3569.97	0.01806965		4099.97	0.08816545
390.2	0.01229461		920.19	0.00747814		1450.19	0.05952022		1980.18	0.05917331		2510.18	0.01641869		3040.17	0.04319311		3570.17	0.01787059		4100.17	0.08788765
390.4	0.01206919		920.39	0.00766785		1450.39	0.05861378		1980.38	0.05892924		2510.38	0.01624128		3040.37	0.04339679		3570.37	0.01808934		4100.37	0.08746052
390.6	0.01208789		920.59	0.00761818		1450.59	0.05768968		1980.58	0.0590507		2510.58	0.01496899		3040.57	0.04427795		3570.57	0.01762381		4100.57	0.08736256
390.8	0.01193808		920.79	0.0072277		1450.79	0.05805212		1980.78	0.05958725		2510.78	0.01457546		3040.77	0.04358733		3570.77	0.01702192		4100.77	0.08698635
391	0.01143289		920.99	0.00686455		1450.99	0.05795527		1980.98	0.05958366		2510.98	0.01416731		3040.97	0.04377016		3570.97	0.01653266		4100.97	0.08705535
391.2	0.01183348		921.19	0.00678968		1451.19	0.05769073		1981.18	0.05895287		2511.18	0.01482312		3041.17	0.0439284		3571.17	0.01686068		4101.17	0.08684057
391.4	0.0123464		921.39	0.00636873		1451.39	0.05829097		1981.38	0.05902587		2511.38	0.01462307		3041.37	0.0448057		3571.37	0.01793575		4101.37	0.08745053
391.6	0.01247948		921.59	0.00577201		1451.59	0.05822704		1981.58	0.05795449		2511.58	0.01447712		3041.57	0.04429164		3571.57	0.01815981		4101.57	0.08839844
391.8	0.01241303		921.79	0.00505183		1451.79	0.05747171		1981.78	0.05772239		2511.78	0.01490634		3041.77	0.04405818		3571.77	0.01917867		4101.77	0.08911833
392	0.01281454		921.99	0.00500744		1451.99	0.0565917		1981.98	0.05757532		2511.98	0.01521942		3041.97	0.04413069		3571.97	0.02025343		4101.97	0.08968488
392.2	0.01347271		922.19	0.00560555		1452.19	0.05633713		1982.18	0.05794214		2512.18	0.0154992		3042.17	0.0443191		3572.17	0.02069569		4102.17	0.08931195
392.4	0.01184035		922.39	0.00522659		1452.39	0.05686619		1982.38	0.05892474		2512.38	0.01606914		3042.37	0.04399245		3572.37	0.02065223		4102.37	0.09004742
392.6	0.01257544		922.59	0.00575266		1452.59	0.05718118		1982.58	0.05828844		2512.58	0.01616608		3042.57	0.04342266		3572.57	0.0204713		4102.57	0.09040403
392.8	0.01225296		922.79	0.00621398		1452.79	0.05784003		1982.78	0.05818167		2512.78	0.01592801		3042.77	0.04291456		3572.77	0.02008871		4102.77	0.0908551
393	0.01177566		922.99	0.00624049		1452.99	0.05752342		1982.98	0.05844747		2512.98	0.01535036		3042.97	0.04265525		3572.97	0.01928812		4102.97	0.0899521
393.2	0.01139157		923.19	0.00487809		1453.19	0.05731905		1983.18	0.05768685		2513.18	0.01480506		3043.17	0.04301801		3573.17	0.01898732		4103.17	0.08923628
393.4	0.01173593		923.39	0.00530399		1453.39	0.05669698		1983.38	0.05760975		2513.38	0.01552612		3043.37	0.04257882		3573.37	0.01873291		4103.37	0.08912145
393.6	0.01113284		923.59	0.0060155		1453.59	0.0565665		1983.58	0.05727432		2513.58	0.01482845		3043.57	0.04314805		3573.57	0.01931444		4103.57	0.08990856
393.8	0.01077314		923.79	0.00692818		1453.79	0.05649859		1983.78	0.0566227		2513.78	0.01476578		3043.77	0.04247735		3573.77	0.01953607		4103.77	0.08924356
394	0.01057722		923.99	0.00719891		1453.99	0.05617979		1983.98	0.05694687		2513.98	0.01474518		3043.97	0.04230147		3573.97	0.01982296		4103.97	0.08837687
394.2	0.00995043		924.19	0.00739307		1454.19	0.05612109		1984.18	0.05725802		2514.18	0.01519449		3044.17	0.04271204		3574.17	0.02002147		4104.17	0.08705556
394.4	0.00896592		924.39	0.00793432		1454.39	0.05556265		1984.38	0.05830851		2514.38	0.0145982		3044.37	0.04307942		3574.37	0.02052525		4104.37	0.08698285
394.6	0.00867107		924.59	0.00806928		1454.59	0.05512547		1984.58	0.05841095		2514.58	0.01384998		3044.57	0.04235229		3574.57	0.02000597		4104.57	0.08638236
394.8	0.00836439		924.79	0.0077589		1454.79	0.05473492		1984.78	0.05907037		2514.78	0.01459601		3044.77	0.04167162		3574.77	0.02037834		4104.77	0.08614192
395	0.00827303		924.99	0.00723329		1454.99	0.05464052		1984.98	0.05837659		2514.98	0.0146669		3044.97	0.04165825		3574.97	0.02095803		4104.97	0.08620187
395.2	0.00858497		925.19	0.00723337		1455.19	0.05455495		1985.18	0.05796261		2515.18	0.01522707		3045.17	0.04224215		3575.17	0.02141449		4105.17	0.0871386
395.4	0.0086789		925.39	0.0076561		1455.39	0.05452127		1985.38	0.05871329		2515.38	0.015398		3045.37	0.04240916		3575.37	0.02181244		4105.37	0.08770575
395.6	0.00936037		925.59	0.0078264		1455.59	0.05433954		1985.58	0.05771552		2515.58	0.01558509		3045.57	0.04231483		3575.57	0.02204454		4105.57	0.08847417
395.8	0.00952097		925.79	0.00727842		1455.79	0.05367147		1985.78	0.05808706		2515.78	0.01611363		3045.77	0.0423671		3575.77	0.02251209		4105.77	0.08861879
396	0.01009217		925.99	0.00786349		1455.99	0.05468676		1985.98	0.0583916		2515.98	0.01700678		3045.97	0.0432013		3575.97	0.02230588		4105.97	0.08928421
396.2	0.01093636		926.19	0.00828391		1456.19	0.05566477		1986.18	0.05807845		2516.18	0.01706687		3046.17	0.04332469		3576.17	0.02155506		4106.17	0.08950206
396.4	0.01066741		926.39	0.00825623		1456.39	0.05669763		1986.38	0.05859846		2516.38	0.01707171		3046.37	0.04285428		3576.37	0.021153		4106.37	0.09056116
396.6	0.01129823		926.59	0.00875223		1456.59	0.05674886		1986.58	0.05797124		2516.58	0.01670392		3046.57	0.04303295		3576.57	0.01962369		4106.57	0.09065019
396.8	0.01002283		926.79	0.00785593		1456.79	0.05715421		1986.78	0.0580939		2516.78	0.01582781		3046.77	0.04361068		3576.77	0.01912786		4106.77	0.09146881
397	0.01010274		926.99	0.00708982		1456.99	0.05705572		1986.98	0.05889802		2516.98	0.01547936		3046.97	0.04328941		3576.97	0.01856065		4106.97	0.0913241
397.2	0.01082384		927.19	0.00574161		1457.19	0.05709088		1987.18	0.0586216		2517.18	0.01558504		3047.17	0.04326789		3577.17	0.01789318		4107.17	0.09130471
397.4	0.01056818		927.39	0.00547892		1457.39	0.05706333		1987.38	0.05913987		2517.38	0.01580356		3047.37	0.04318743		3577.37	0.01770933		4107.37	0.09142476
397.6	0.01037896		927.59	0.00576017		1457.59	0.05796086		1987.58	0.05980585		2517.58	0.01499		3047.57	0.04326386		3577.57	0.01669443		4107.57	0.09132879
397.8	0.01003837		927.79	0.00651779		1457.79	0.05872228		1987.78	0.05942102		2517.78	0.01470546		3047.77	0.04305969		3577.77	0.01621986		4107.77	0.09039781
398	0.01014966		927.99	0.00655075		1457.99	0.05842144		1987.98	0.05966924		2517.98	0.01439356		3047.97	0.04419384		3577.97	0.01653757		4107.97	0.0901621
398.2	0.00958675		928.19	0.00648414		1458.19	0.05875209		1988.18	0.06009425		2518.18	0.01396736		3048.17	0.04467386		3578.17	0.01639849		4108.17	0.08969863
398.4	0.00842669		928.39	0.00627362		1458.39	0.05879501		1988.38	0.06091982		2518.38	0.01288992		3048.37	0.04455801		3578.37	0.01693503		4108.37	0.08984924
398.6	0.0074007		928.59	0.00532817		1458.59	0.0579842		1988.58	0.06077693		2518.58	0.01267817		3048.57	0.04418629		3578.57	0.01699798		4108.57	0.08897031
398.8	0.00711436		928.79	0.00582802		1458.79	0.05811729		1988.78	0.06159772		2518.78	0.01246065		3048.77	0.04442237		3578.77	0.01696833		4108.77	0.0880659
399	0.00673979		928.99	0.0060979		1458.99	0.05849546		1988.98	0.06143761		2518.98	0.01282562		3048.97	0.04526287		3578.97	0.01638479		4108.97	0.08751448
399.2	0.00698022		929.19	0.00699692		1459.19	0.05764519		1989.18	0.06138036		2519.18	0.01242552		3049.17	0.04547876		3579.17	0.01621537		4109.17	0.08764232
399.4	0.00749135		929.39	0.00810274		1459.39	0.05777813		1989.38	0.06138727		2519.38	0.01264678		3049.37	0.04495925		3579.37	0.01675813		4109.37	0.08754512
399.6	0.00849244		929.59	0.00763806		1459.59	0.05703559		1989.58	0.06056491		2519.58	0.01229847		3049.57	0.04578716		3579.57	0.01671309		4109.57	0.08766171
399.8	0.00816967		929.79	0.0073241		1459.79	0.05683677		1989.78	0.06050799		2519.78	0.01300219		3049.77	0.0452756		3579.77	0.01643253		4109.77	0.08754404
400	0.00920619		929.99	0.00852355		1459.99	0.05717007		1989.98	0.06071451		2519.98	0.01260174		3049.97	0.04503479		3579.97	0.01632514		4109.97	0.08744397
400.2	0.01025565		930.19	0.00879087		1460.19	0.05681694		1990.18	0.06045518		2520.18	0.01219028		3050.17	0.04456197		3580.17	0.0155165		4110.17	0.08714361
400.4	0.01096521		930.39	0.00834499		1460.39	0.05699551		1990.38	0.06049261		2520.38	0.01254548		3050.37	0.04380947		3580.37	0.01609199		4110.37	0.08762696
400.6	0.01152071		930.59	0.0084511		1460.59	0.05652658		1990.58	0.06006868		2520.58	0.01221872		3050.57	0.04378434		3580.57	0.01548548		4110.57	0.088023
400.8	0.01235153		930.79	0.00834477		1460.79	0.05603102		1990.78	0.06054736		2520.78	0.01285835		3050.77	0.0434657		3580.77	0.01576723		4110.77	0.08878378
401	0.01309117		930.99	0.00821105		1460.99	0.05552534		1990.98	0.06163039		2520.98	0.01331469		3050.97	0.04288794		3580.97	0.0170647		4110.97	0.08850645
401.2	0.01303435		931.19	0.00767613		1461.19	0.05498065		1991.18	0.06175434		2521.18	0.01423932		3051.17	0.04297622		3581.17	0.01720623		4111.17	0.088549
401.4	0.01292259		931.39	0.00724069		1461.39	0.05585182		1991.38	0.06260227		2521.38	0.014631		3051.37	0.04309907		3581.37	0.0170587		4111.37	0.08931848
401.6	0.01270242		931.59	0.00777042		1461.59	0.05576002		1991.58	0.06268564		2521.58	0.01465905		3051.57	0.04310985		3581.57	0.01784575		4111.57	0.09020329
401.8	0.01259128		931.79	0.00769438		1461.79	0.05579105		1991.78	0.06267474		2521.78	0.01479419		3051.77	0.04339636		3581.77	0.01896064		4111.77	0.09028515
402	0.01220526		931.99	0.00631978		1461.99	0.05510367		1991.98	0.06291202		2521.98	0.01528206		3051.97	0.04349617		3581.97	0.0195012		4111.97	0.09125108
402.2	0.01052278		932.19	0.00529121		1462.19	0.05506937		1992.18	0.06345404		2522.18	0.01524887		3052.17	0.0428294		3582.17	0.01934556		4112.17	0.09106717
402.4	0.00930956		932.39	0.00438169		1462.39	0.05557062		1992.38	0.06374807		2522.38	0.01455816		3052.37	0.04235376		3582.37	0.02089002		4112.37	0.09171615
402.6	0.00862576		932.59	0.00463197		1462.59	0.05602294		1992.58	0.06385862		2522.58	0.01441727		3052.57	0.04269656		3582.57	0.02037691		4112.57	0.09180848
402.8	0.00817818		932.79	0.00469493		1462.79	0.0568383		1992.78	0.06386054		2522.78	0.01410519		3052.77	0.04269525		3582.77	0.01986453		4112.77	0.09097079
403	0.00770408		932.99	0.00362975		1462.99	0.05700931		1992.98	0.06338121		2522.98	0.01407179		3052.97	0.04336069		3582.97	0.0196972		4112.97	0.09144779
403.2	0.00825839		933.19	0.00370395		1463.19	0.05718669		1993.18	0.06274245		2523.18	0.01271154		3053.17	0.0426763		3583.17	0.01972058		4113.17	0.09134822
403.4	0.00851802		933.39	0.00336713		1463.39	0.05843297		1993.38	0.06197815		2523.38	0.01267736		3053.37	0.04211125		3583.37	0.01942607		4113.37	0.09173982
403.6	0.00901977		933.59	0.00248434		1463.59	0.05818315		1993.58	0.06059484		2523.58	0.01318119		3053.57	0.04174379		3583.57	0.01807605		4113.57	0.09143651
403.8	0.00928923		933.79	0.00333294		1463.79	0.05898373		1993.78	0.06008516		2523.78	0.01401034		3053.77	0.04109545		3583.77	0.01738147		4113.77	0.09142615
404	0.00981769		933.99	0.00436468		1463.99	0.05919737		1993.98	0.05969225		2523.98	0.01330141		3053.97	0.04061425		3583.97	0.01687139		4113.97	0.09099622
404.2	0.00982111		934.19	0.00469275		1464.19	0.05913198		1994.18	0.05880683		2524.18	0.01391333		3054.17	0.04049814		3584.17	0.01580228		4114.17	0.09097012
404.4	0.0110889		934.39	0.00512946		1464.39	0.05909446		1994.38	0.05815428		2524.38	0.01419303		3054.37	0.04046376		3584.37	0.01556472		4114.37	0.0909104
404.6	0.01246459		934.59	0.00604361		1464.59	0.05877875		1994.58	0.05850531		2524.58	0.01407391		3054.57	0.04066328		3584.57	0.01551373		4114.57	0.09013982
404.8	0.01312783		934.79	0.0065547		1464.79	0.0582398		1994.78	0.05912043		2524.78	0.01502286		3054.77	0.04040938		3584.77	0.01531152		4114.77	0.09037919
405	0.01252427		934.99	0.00660792		1464.99	0.05777424		1994.98	0.05964477		2524.98	0.01491228		3054.97	0.04032755		3584.97	0.01620895		4114.97	0.09020326
405.2	0.01284183		935.19	0.00602644		1465.19	0.05719335		1995.18	0.05961999		2525.18	0.01429705		3055.17	0.04089368		3585.17	0.01583075		4115.17	0.09009323
405.4	0.0123489		935.39	0.00627391		1465.39	0.05766331		1995.38	0.05918847		2525.38	0.01378142		3055.37	0.04172335		3585.37	0.01622205		4115.37	0.09041109
405.6	0.01094413		935.59	0.00637331		1465.59	0.05647291		1995.58	0.05910305		2525.58	0.01359757		3055.57	0.04149842		3585.57	0.01700248		4115.57	0.09034722
405.8	0.01100374		935.79	0.00599489		1465.79	0.05550644		1995.78	0.05892164		2525.78	0.01367977		3055.77	0.04260095		3585.77	0.0175259		4115.77	0.09101138
406	0.0098239		935.99	0.00564339		1465.99	0.05436247		1995.98	0.05909591		2525.98	0.01358203		3055.97	0.04259059		3585.97	0.01814837		4115.97	0.09162768
406.2	0.00878786		936.19	0.00533656		1466.19	0.05419169		1996.18	0.05900473		2526.18	0.01315656		3056.17	0.04210582		3586.17	0.01794238		4116.17	0.09144907
406.4	0.00807909		936.39	0.00562094		1466.39	0.05402027		1996.38	0.05935675		2526.38	0.01250529		3056.37	0.04201735		3586.37	0.01796201		4116.37	0.09198733
406.6	0.00731605		936.59	0.00544185		1466.59	0.05466527		1996.58	0.05975883		2526.58	0.01222296		3056.57	0.04224017		3586.57	0.01729812		4116.57	0.09243856
406.8	0.00684765		936.79	0.00450434		1466.79	0.05508695		1996.78	0.05944689		2526.78	0.01146371		3056.77	0.04155862		3586.77	0.01737694		4116.77	0.09228226
407	0.00720591		936.99	0.00440638		1466.99	0.05544959		1996.98	0.06012672		2526.98	0.01060683		3056.97	0.0419676		3586.97	0.01720976		4116.97	0.09242768
407.2	0.00751389		937.19	0.00508635		1467.19	0.05626894		1997.18	0.05985738		2527.18	0.01006247		3057.17	0.04141419		3587.17	0.01737443		4117.17	0.09202627
407.4	0.00740578		937.39	0.00584653		1467.39	0.05741549		1997.38	0.06053655		2527.38	0.01068644		3057.37	0.04198349		3587.37	0.01658626		4117.37	0.09223303
407.6	0.00744008		937.59	0.0061324		1467.59	0.05670869		1997.58	0.06107322		2527.58	0.01112904		3057.57	0.04178248		3587.57	0.0157711		4117.57	0.09229121
407.8	0.00751608		937.79	0.00635951		1467.79	0.05722748		1997.78	0.06219003		2527.78	0.01136925		3057.77	0.04218398		3587.77	0.01511912		4117.77	0.0922776
408	0.00666031		937.99	0.00682977		1467.99	0.05676773		1997.98	0.06275704		2527.98	0.01064727		3057.97	0.04169771		3587.97	0.01481868		4117.97	0.09149203
408.2	0.00652811		938.19	0.00735465		1468.19	0.05655043		1998.18	0.06376428		2528.18	0.01167511		3058.17	0.04164426		3588.17	0.01405045		4118.17	0.09154809
408.4	0.0069556		938.39	0.00742325		1468.39	0.05683277		1998.38	0.06456481		2528.38	0.0117315		3058.37	0.04108336		3588.37	0.01380542		4118.37	0.09108037
408.6	0.00726973		938.59	0.00648835		1468.59	0.05659347		1998.58	0.06562491		2528.58	0.01169887		3058.57	0.04089647		3588.57	0.01399415		4118.57	0.091129
408.8	0.00796714		938.79	0.00599983		1468.79	0.05628039		1998.78	0.06542483		2528.78	0.01175268		3058.77	0.04120778		3588.77	0.01263224		4118.77	0.0912331
409	0.00841476		938.99	0.00539372		1468.99	0.05572379		1998.98	0.06443128		2528.98	0.0118632		3058.97	0.04203095		3588.97	0.01323787		4118.97	0.09147952
409.2	0.00919647		939.19	0.0048045		1469.19	0.05589685		1999.18	0.06307162		2529.18	0.01154824		3059.17	0.04310371		3589.17	0.01338053		4119.17	0.09092235
409.4	0.00823872		939.39	0.00430626		1469.39	0.05571455		1999.38	0.06190056		2529.38	0.01234264		3059.37	0.04362502		3589.37	0.0135334		4119.37	0.09146234
409.6	0.00839811		939.59	0.00375564		1469.59	0.05458145		1999.58	0.06136169		2529.58	0.01191461		3059.57	0.04336144		3589.57	0.01420521		4119.57	0.0913624
409.8	0.00923111		939.79	0.00365795		1469.79	0.05376128		1999.78	0.05991718		2529.78	0.01212193		3059.77	0.04421105		3589.77	0.01563773		4119.77	0.09139222
410	0.008728		939.99	0.00248094		1469.99	0.0532769		1999.98	0.05848856		2529.98	0.01152782		3059.97	0.04339598		3589.97	0.0166873		4119.97	0.09143409
410.2	0.00893456		940.19	0.00193354		1470.19	0.05364853		2000.18	0.05798571		2530.18	0.01192151		3060.17	0.04269513		3590.17	0.01638496		4120.17	0.09119361
410.4	0.00875259		940.39	0.0021934		1470.39	0.05405353		2000.38	0.05751091		2530.38	0.01188135		3060.37	0.04226976		3590.37	0.0171945		4120.37	0.09146388
410.6	0.00892922		940.59	0.00170971		1470.59	0.05443445		2000.58	0.05675368		2530.58	0.01183469		3060.57	0.04264339		3590.57	0.01818409		4120.57	0.09119822
410.8	0.00956332		940.79	0.00151564		1470.79	0.05419638		2000.78	0.05630335		2530.78	0.01155031		3060.77	0.04296379		3590.77	0.01916413		4120.77	0.09026927
411	0.01042042		940.99	0.00196534		1470.99	0.05449019		2000.98	0.05688477		2530.98	0.01115655		3060.97	0.04355224		3590.97	0.01979977		4120.97	0.0892359
411.2	0.01054175		941.19	0.00279323		1471.19	0.05459248		2001.18	0.05649875		2531.18	0.01113407		3061.17	0.044208		3591.17	0.02028502		4121.17	0.08881746
411.4	0.01064639		941.39	0.00296604		1471.39	0.05457695		2001.38	0.05737795		2531.38	0.01175437		3061.37	0.04402389		3591.37	0.01962012		4121.37	0.08812772
411.6	0.01022461		941.59	0.00282581		1471.59	0.05389881		2001.58	0.05708632		2531.58	0.01122615		3061.57	0.04370831		3591.57	0.020178		4121.57	0.08852565
411.8	0.00965566		941.79	0.00363893		1471.79	0.05450748		2001.78	0.05822647		2531.78	0.01144839		3061.77	0.04286789		3591.77	0.02051824		4121.77	0.08875626
412	0.00866671		941.99	0.00464722		1471.99	0.0544695		2001.98	0.0594467		2531.98	0.01179083		3061.97	0.04219462		3591.97	0.02061249		4121.97	0.08895755
412.2	0.00775497		942.19	0.00545995		1472.19	0.05397605		2002.18	0.05971779		2532.18	0.01277717		3062.17	0.04111473		3592.17	0.02034465		4122.17	0.08950625
412.4	0.00798127		942.39	0.00559597		1472.39	0.05468674		2002.38	0.06050699		2532.38	0.01291763		3062.37	0.04011172		3592.37	0.01881259		4122.37	0.08966772
412.6	0.00786056		942.59	0.00503703		1472.59	0.05454892		2002.58	0.06101483		2532.58	0.0134369		3062.57	0.03977824		3592.57	0.01826996		4122.57	0.09060514
412.8	0.00792403		942.79	0.0048229		1472.79	0.0543881		2002.78	0.06066335		2532.78	0.01371723		3062.77	0.03983498		3592.77	0.01767431		4122.77	0.09030345
413	0.00794845		942.99	0.00481343		1472.99	0.05436205		2002.98	0.06027268		2532.98	0.01311579		3062.97	0.0393155		3592.97	0.01821173		4122.97	0.09042715
413.2	0.00690827		943.19	0.00479502		1473.19	0.05472828		2003.18	0.06044617		2533.18	0.01246729		3063.17	0.03888061		3593.17	0.01778324		4123.17	0.09016453
413.4	0.00601413		943.39	0.0048919		1473.39	0.05404003		2003.38	0.06099366		2533.38	0.01214302		3063.37	0.03800899		3593.37	0.01721392		4123.37	0.09022914
413.6	0.00631195		943.59	0.00520903		1473.59	0.05423028		2003.58	0.06096508		2533.58	0.01125361		3063.57	0.03812222		3593.57	0.01782953		4123.57	0.08923693
413.8	0.00612515		943.79	0.00505493		1473.79	0.05449607		2003.78	0.05953742		2533.78	0.01152087		3063.77	0.03790563		3593.77	0.01794341		4123.77	0.08858734
414	0.0060654		943.99	0.00447678		1473.99	0.05521173		2003.98	0.05876779		2533.98	0.01165916		3063.97	0.03841756		3593.97	0.01828667		4123.97	0.08952122
414.2	0.00641605		944.19	0.00426202		1474.19	0.05606102		2004.18	0.0592248		2534.18	0.01209274		3064.17	0.03902303		3594.17	0.01747908		4124.17	0.08857104
414.4	0.0065297		944.39	0.0038051		1474.39	0.05635417		2004.38	0.05790978		2534.38	0.01140499		3064.37	0.04012194		3594.37	0.01790448		4124.37	0.08777362
414.6	0.00739505		944.59	0.00304933		1474.59	0.0566443		2004.58	0.05741443		2534.58	0.01110388		3064.57	0.04115923		3594.57	0.0171559		4124.57	0.08756208
414.8	0.00828869		944.79	0.00303077		1474.79	0.05691015		2004.78	0.05782711		2534.78	0.01051549		3064.77	0.04218947		3594.77	0.01739721		4124.77	0.08661322
415	0.00974054		944.99	0.00357836		1474.99	0.05780892		2004.98	0.05767899		2534.98	0.00965591		3064.97	0.04299416		3594.97	0.01633091		4124.97	0.08637783
415.2	0.01055526		945.19	0.00301066		1475.19	0.05721066		2005.18	0.05704781		2535.18	0.01021519		3065.17	0.04359761		3595.17	0.01577249		4125.17	0.08670678
415.4	0.01050303		945.39	0.00274751		1475.39	0.05672897		2005.38	0.05650485		2535.38	0.00954928		3065.37	0.04387819		3595.37	0.01536521		4125.37	0.08670822
415.6	0.0099874		945.59	0.00287521		1475.59	0.0562651		2005.58	0.05605643		2535.58	0.00941019		3065.57	0.04501792		3595.57	0.01566724		4125.57	0.08753178
415.8	0.01047341		945.79	0.00349788		1475.79	0.0565841		2005.78	0.05691949		2535.78	0.01013947		3065.77	0.04456012		3595.77	0.01524775		4125.77	0.08811105
416	0.01068113		945.99	0.00387553		1475.99	0.05625898		2005.98	0.05709211		2535.98	0.01043077		3065.97	0.04434699		3595.97	0.01432769		4125.97	0.08916067
416.2	0.01091484		946.19	0.00464798		1476.19	0.05584649		2006.18	0.05704355		2536.18	0.01110929		3066.17	0.04323211		3596.17	0.0138793		4126.17	0.08949151
416.4	0.01107033		946.39	0.00541065		1476.39	0.05605445		2006.38	0.05878979		2536.38	0.01160109		3066.37	0.04309866		3596.37	0.01331607		4126.37	0.09052841
416.6	0.01072243		946.59	0.00507563		1476.59	0.055245		2006.58	0.05896493		2536.58	0.01140418		3066.57	0.04337398		3596.57	0.01383955		4126.57	0.09102403
416.8	0.01043968		946.79	0.00476689		1476.79	0.05450863		2006.78	0.05952048		2536.78	0.01132538		3066.77	0.04309197		3596.77	0.01319956		4126.77	0.09001819
417	0.00970284		946.99	0.00527571		1476.99	0.05374026		2006.98	0.06022099		2536.98	0.01077626		3066.97	0.04309857		3596.97	0.01391876		4126.97	0.09041526
417.2	0.00923616		947.19	0.00504813		1477.19	0.05294896		2007.18	0.06118597		2537.18	0.01131182		3067.17	0.04255548		3597.17	0.01476365		4127.17	0.09047146
417.4	0.0092122		947.39	0.00535671		1477.39	0.05324255		2007.38	0.06090695		2537.38	0.01251335		3067.37	0.04244059		3597.37	0.01484689		4127.37	0.09008826
417.6	0.00956004		947.59	0.00486408		1477.59	0.05355482		2007.58	0.06059371		2537.58	0.01231814		3067.57	0.04308011		3597.57	0.01612645		4127.57	0.08953074
417.8	0.00914507		947.79	0.00412097		1477.79	0.05437847		2007.78	0.06022008		2537.78	0.01232014		3067.77	0.04351255		3597.77	0.01687369		4127.77	0.08972284
418	0.00911721		947.99	0.00295313		1477.99	0.05496709		2007.98	0.06039865		2537.98	0.01314494		3067.97	0.0443373		3597.97	0.0180186		4127.97	0.09005973
418.2	0.00881672		948.19	0.00258713		1478.19	0.05560168		2008.18	0.0608553		2538.18	0.0129824		3068.17	0.04433976		3598.17	0.01862682		4128.17	0.08893003
418.4	0.00887842		948.39	0.00277036		1478.39	0.05612911		2008.38	0.06028768		2538.38	0.01184461		3068.37	0.04424688		3598.37	0.01995246		4128.37	0.08849927
418.6	0.00923027		948.59	0.00221719		1478.59	0.05669362		2008.58	0.06111953		2538.58	0.01197029		3068.57	0.04343146		3598.57	0.01982939		4128.57	0.08866827
418.8	0.00896897		948.79	0.00237236		1478.79	0.05696994		2008.78	0.06143761		2538.78	0.01151181		3068.77	0.04407344		3598.77	0.02006396		4128.77	0.08807943
419	0.00866056		948.99	0.00261313		1478.99	0.05723948		2008.98	0.06043508		2538.98	0.01185959		3068.97	0.04388221		3598.97	0.01946734		4128.97	0.08853739
419.2	0.0078769		949.19	0.00154816		1479.19	0.05698556		2009.18	0.06021283		2539.18	0.01252072		3069.17	0.04326908		3599.17	0.01994747		4129.17	0.08914286
419.4	0.0063987		949.39	0.00133455		1479.39	0.05695687		2009.38	0.05995785		2539.38	0.01227591		3069.37	0.04317619		3599.37	0.02014745		4129.37	0.08905743
419.6	0.00532279		949.59	0.00152031		1479.59	0.05730709		2009.58	0.05962219		2539.58	0.01362182		3069.57	0.04258525		3599.57	0.01939624		4129.57	0.08955908
419.8	0.00591667		949.79	0.00270215		1479.79	0.0577479		2009.78	0.06014822		2539.78	0.01401255		3069.77	0.04187337		3599.77	0.01888606		4129.77	0.09043882
420	0.00562444		949.99	0.00326936		1479.99	0.05738504		2009.98	0.05960965		2539.98	0.01362233		3069.97	0.04085515		3599.97	0.0186325		4129.97	0.09076475
420.2	0.00523777		950.19	0.00361915		1480.19	0.05783931		2010.18	0.05988079		2540.18	0.01368604		3070.17	0.03990469		3600.17	0.0188093		4130.17	0.09119108
420.4	0.00514886		950.39	0.00416142		1480.39	0.05758907		2010.38	0.06039937		2540.38	0.0133416		3070.37	0.03978069		3600.37	0.01832949		4130.37	0.09116861
420.6	0.00501966		950.59	0.00439275		1480.59	0.05732861		2010.58	0.0600715		2540.58	0.01248033		3070.57	0.03959703		3600.57	0.01765327		4130.57	0.0908862
420.8	0.00458787		950.79	0.00525241		1480.79	0.05596164		2010.78	0.05989901		2540.78	0.01278766		3070.77	0.03822572		3600.77	0.01700381		4130.77	0.09067977
421	0.00443293		950.99	0.00608529		1480.99	0.05499642		2010.98	0.05978329		2540.98	0.01140592		3070.97	0.03788111		3600.97	0.01754398		4130.97	0.0901918
421.2	0.00584482		951.19	0.00630907		1481.19	0.05496503		2011.18	0.05934713		2541.18	0.01103914		3071.17	0.03686704		3601.17	0.01778464		4131.17	0.09014143
421.4	0.00607286		951.39	0.00616549		1481.39	0.05527082		2011.38	0.05855455		2541.38	0.01096802		3071.37	0.0378598		3601.37	0.01652149		4131.37	0.0898593
421.6	0.00667254		951.59	0.0056774		1481.59	0.05476233		2011.58	0.05877881		2541.58	0.00988909		3071.57	0.03795756		3601.57	0.01653829		4131.57	0.08945115
421.8	0.00657165		951.79	0.00521864		1481.79	0.05551748		2011.78	0.05908427		2541.78	0.01071079		3071.77	0.0386497		3601.77	0.01610584		4131.77	0.08921846
422	0.00721065		951.99	0.00528159		1481.99	0.05465968		2011.98	0.05908544		2541.98	0.01096344		3071.97	0.03920642		3601.97	0.01636153		4131.97	0.08862352
422.2	0.00744272		952.19	0.00537388		1482.19	0.05530819		2012.18	0.05951347		2542.18	0.01064328		3072.17	0.03936306		3602.17	0.01648469		4132.17	0.08849577
422.4	0.00763183		952.39	0.00508272		1482.39	0.05606317		2012.38	0.05920977		2542.38	0.01031972		3072.37	0.03981598		3602.37	0.01640093		4132.37	0.08893737
422.6	0.00751475		952.59	0.00425184		1482.59	0.05705084		2012.58	0.06022059		2542.58	0.01113389		3072.57	0.04083555		3602.57	0.01604292		4132.57	0.08899407
422.8	0.00661345		952.79	0.00410991		1482.79	0.05710184		2012.78	0.06001254		2542.78	0.0114531		3072.77	0.0422119		3602.77	0.01577608		4132.77	0.08988821
423	0.00611191		952.99	0.00384295		1482.99	0.05777923		2012.98	0.05989412		2542.98	0.0125985		3072.97	0.04250054		3602.97	0.01552954		4132.97	0.0895589
423.2	0.00640082		953.19	0.00276967		1483.19	0.05871255		2013.18	0.06011332		2543.18	0.0131775		3073.17	0.04283055		3603.17	0.01574485		4133.17	0.08947737
423.4	0.00587765		953.39	0.00213677		1483.39	0.05852697		2013.38	0.06053087		2543.38	0.01378563		3073.37	0.04348792		3603.37	0.0154004		4133.37	0.08937971
423.6	0.00599838		953.59	0.00248012		1483.59	0.05876831		2013.58	0.05979438		2543.58	0.01411027		3073.57	0.04390237		3603.57	0.01448629		4133.57	0.08918286
423.8	0.00620584		953.79	0.00223729		1483.79	0.05842427		2013.78	0.05994545		2543.78	0.01376937		3073.77	0.04369317		3603.77	0.01535137		4133.77	0.08925922
424	0.00574141		953.99	0.00165587		1483.99	0.05827592		2013.98	0.05970749		2543.98	0.01341171		3073.97	0.04352243		3603.97	0.01537532		4133.97	0.08900728
424.2	0.00556176		954.19	0.00146235		1484.19	0.0583267		2014.18	0.05982136		2544.18	0.0133924		3074.17	0.04338143		3604.17	0.01516751		4134.17	0.08952561
424.4	0.00598753		954.39	0.00209017		1484.39	0.05743078		2014.38	0.05976309		2544.38	0.01396344		3074.37	0.04259269		3604.37	0.01552382		4134.37	0.08920526
424.6	0.00578673		954.59	0.00303777		1484.59	0.05609274		2014.58	0.05943599		2544.58	0.01396183		3074.57	0.04244013		3604.57	0.01548001		4134.57	0.08989811
424.8	0.00571496		954.79	0.00386891		1484.79	0.05488743		2014.78	0.05877388		2544.78	0.01435294		3074.77	0.0409443		3604.77	0.01593784		4134.77	0.08965525
425	0.00588171		954.99	0.0048609		1484.99	0.05498115		2014.98	0.05800674		2544.98	0.01329133		3074.97	0.04063902		3604.97	0.01574414		4134.97	0.08949678
425.2	0.00636672		955.19	0.00481926		1485.19	0.05510948		2015.18	0.05792858		2545.18	0.01300268		3075.17	0.04038576		3605.17	0.01635997		4135.17	0.09044806
425.4	0.00640955		955.39	0.00530978		1485.39	0.05476191		2015.38	0.05809417		2545.38	0.01334451		3075.37	0.04113087		3605.37	0.01591111		4135.37	0.09024112
425.6	0.0065254		955.59	0.00607375		1485.59	0.05434262		2015.58	0.05824431		2545.58	0.01275154		3075.57	0.04092579		3605.57	0.01621453		4135.57	0.08992302
425.8	0.00627354		955.79	0.00637378		1485.79	0.05466079		2015.78	0.05829001		2545.78	0.01310315		3075.77	0.04145806		3605.77	0.01608919		4135.77	0.08958467
426	0.006724		955.99	0.00629538		1485.99	0.05436775		2015.98	0.05812863		2545.98	0.01204212		3075.97	0.04151859		3605.97	0.01742111		4135.97	0.08963863
426.2	0.00652912		956.19	0.00651945		1486.19	0.05561459		2016.18	0.05848478		2546.18	0.01264186		3076.17	0.04117508		3606.17	0.01748348		4136.17	0.08989136
426.4	0.00688372		956.39	0.00704293		1486.39	0.05617567		2016.38	0.0581595		2546.38	0.01224452		3076.37	0.04139771		3606.37	0.01758692		4136.37	0.08951265
426.6	0.00695902		956.59	0.00659642		1486.59	0.05693513		2016.58	0.0593669		2546.58	0.01251883		3076.57	0.04234572		3606.57	0.01708176		4136.57	0.0894238
426.8	0.00658645		956.79	0.00681011		1486.79	0.05703885		2016.78	0.06014562		2546.78	0.01237486		3076.77	0.0426304		3606.77	0.01698171		4136.77	0.08930701
427	0.00676835		956.99	0.00669872		1486.99	0.05816551		2016.98	0.06066663		2546.98	0.01189974		3076.97	0.0427538		3606.97	0.01644268		4136.97	0.08817402
427.2	0.00701478		957.19	0.00584303		1487.19	0.05859086		2017.18	0.06066557		2547.18	0.01128655		3077.17	0.04301095		3607.17	0.01656336		4137.17	0.08739487
427.4	0.00676399		957.39	0.00615546		1487.39	0.05788686		2017.38	0.06078268		2547.38	0.01117912		3077.37	0.0430132		3607.37	0.01661415		4137.37	0.08617754
427.6	0.00666145		957.59	0.00618542		1487.59	0.05778675		2017.58	0.06004731		2547.58	0.01148776		3077.57	0.04277469		3607.57	0.01701836		4137.57	0.08587423
427.8	0.00622434		957.79	0.0055959		1487.79	0.05790249		2017.78	0.06019698		2547.78	0.01149549		3077.77	0.0421267		3607.77	0.01716966		4137.77	0.08610779
428	0.00670159		957.99	0.00554369		1487.99	0.05815297		2017.98	0.0604838		2547.98	0.01154631		3077.97	0.04243654		3607.97	0.01692965		4137.97	0.08573277
428.2	0.0067753		958.19	0.00576035		1488.19	0.05761039		2018.18	0.059839		2548.18	0.01251427		3078.17	0.04245261		3608.17	0.01722757		4138.17	0.08576763
428.4	0.00676764		958.39	0.00597095		1488.39	0.05698923		2018.38	0.06015335		2548.38	0.01325126		3078.37	0.04179795		3608.37	0.01795591		4138.37	0.0862337
428.6	0.00676507		958.59	0.00659965		1488.59	0.05582095		2018.58	0.05952119		2548.58	0.01372969		3078.57	0.04231755		3608.57	0.01767264		4138.57	0.08724474
428.8	0.00698099		958.79	0.00637875		1488.79	0.05592062		2018.78	0.0589337		2548.78	0.01374307		3078.77	0.04138716		3608.77	0.01808468		4138.77	0.08722518
429	0.00718764		958.99	0.00702568		1488.99	0.05526167		2018.98	0.05854024		2548.98	0.01413819		3078.97	0.04106307		3608.97	0.01809839		4138.97	0.08834361
429.2	0.0073455		959.19	0.00646256		1489.19	0.05469982		2019.18	0.05905264		2549.18	0.01406922		3079.17	0.04076515		3609.17	0.01848044		4139.17	0.08916848
429.4	0.00682838		959.39	0.00684081		1489.39	0.05415274		2019.38	0.05946965		2549.38	0.01395758		3079.37	0.0411422		3609.37	0.01841118		4139.37	0.08907014
429.6	0.00583339		959.59	0.0060803		1489.59	0.05392951		2019.58	0.05860536		2549.58	0.0130258		3079.57	0.04072755		3609.57	0.01852961		4139.57	0.08900364
429.8	0.00508212		959.79	0.00560161		1489.79	0.05407219		2019.78	0.05848839		2549.78	0.01303716		3079.77	0.04018325		3609.77	0.01844431		4139.77	0.08957028
430	0.00480613		959.99	0.00456279		1489.99	0.05404455		2019.98	0.05839729		2549.98	0.01214362		3079.97	0.03973039		3609.97	0.01833217		4139.97	0.08910858
430.2	0.00419781		960.19	0.00494823		1490.19	0.0540841		2020.18	0.05812886		2550.18	0.01194583		3080.17	0.03935942		3610.17	0.01745169		4140.17	0.08933735
430.4	0.00421392		960.39	0.00463719		1490.39	0.05437088		2020.38	0.05805369		2550.38	0.01102707		3080.37	0.03945408		3610.37	0.01716092		4140.37	0.08944215
430.6	0.00344098		960.59	0.00324032		1490.59	0.05532448		2020.58	0.06008077		2550.58	0.01126934		3080.57	0.04023124		3610.57	0.01699619		4140.57	0.09017559
430.8	0.00338797		960.79	0.00379204		1490.79	0.05501684		2020.78	0.06045787		2550.78	0.0102827		3080.77	0.04010958		3610.77	0.01745705		4140.77	0.09044037
431	0.00265941		960.99	0.0034746		1490.99	0.05487136		2020.98	0.06015628		2550.98	0.00858245		3080.97	0.04038218		3610.97	0.01745561		4140.97	0.09036602
431.2	0.00216235		961.19	0.00308852		1491.19	0.0549268		2021.18	0.05973201		2551.18	0.00824775		3081.17	0.04014289		3611.17	0.0176471		4141.17	0.09034305
431.4	0.00228145		961.39	0.00325508		1491.39	0.05504543		2021.38	0.05990535		2551.38	0.0092705		3081.37	0.0394908		3611.37	0.01756591		4141.37	0.08991809
431.6	0.00286172		961.59	0.00261599		1491.59	0.05519865		2021.58	0.05936771		2551.58	0.0093219		3081.57	0.03946357		3611.57	0.01757184		4141.57	0.09087884
431.8	0.00280451		961.79	0.00296265		1491.79	0.0552256		2021.78	0.05915054		2551.78	0.00876583		3081.77	0.03840673		3611.77	0.01670761		4141.77	0.0902886
432	0.00321038		961.99	0.00296592		1491.99	0.05522386		2021.98	0.05935951		2551.98	0.00928724		3081.97	0.03797032		3611.97	0.01735191		4141.97	0.09001711
432.2	0.00361176		962.19	0.00357735		1492.19	0.05408353		2022.18	0.0594399		2552.18	0.01015024		3082.17	0.03788679		3612.17	0.01692203		4142.17	0.09037071
432.4	0.00459063		962.39	0.00383278		1492.39	0.05338906		2022.38	0.05921938		2552.38	0.01026039		3082.37	0.03736367		3612.37	0.0167694		4142.37	0.09067448
432.6	0.00534366		962.59	0.00406431		1492.59	0.05324406		2022.58	0.05845966		2552.58	0.01099209		3082.57	0.03765759		3612.57	0.01700975		4142.57	0.09050549
432.8	0.00670703		962.79	0.00395266		1492.79	0.05441604		2022.78	0.05852225		2552.78	0.01125459		3082.77	0.03748165		3612.77	0.01677803		4142.77	0.08981603
433	0.00674574		962.99	0.00388383		1492.99	0.05373479		2022.98	0.05875139		2552.98	0.01223376		3082.97	0.03752966		3612.97	0.01623097		4142.97	0.09014465
433.2	0.00765027		963.19	0.00333861		1493.19	0.05447594		2023.18	0.05949717		2553.18	0.01205891		3083.17	0.03766819		3613.17	0.01606492		4143.17	0.09044118
433.4	0.00735862		963.39	0.00297582		1493.39	0.05538489		2023.38	0.06004786		2553.38	0.01169691		3083.37	0.03747352		3613.37	0.01593065		4143.37	0.08970975
433.6	0.00762106		963.59	0.00245695		1493.59	0.05555979		2023.58	0.05929788		2553.58	0.0116243		3083.57	0.03762152		3613.57	0.01613483		4143.57	0.08941638
433.8	0.0071432		963.79	0.00257977		1493.79	0.0556178		2023.78	0.05880717		2553.78	0.01093022		3083.77	0.03751947		3613.77	0.01592107		4143.77	0.08946459
434	0.00708174		963.99	0.00246814		1493.99	0.05675651		2023.98	0.05807591		2553.98	0.01035391		3083.97	0.03793191		3613.97	0.01621567		4143.97	0.08847676
434.2	0.00779112		964.19	0.00365336		1494.19	0.05718912		2024.18	0.05780937		2554.18	0.0105627		3084.17	0.03830137		3614.17	0.01697881		4144.17	0.08788059
434.4	0.00780055		964.39	0.00279659		1494.39	0.05784488		2024.38	0.05799241		2554.38	0.01056303		3084.37	0.03945875		3614.37	0.01744369		4144.37	0.0876939
434.6	0.00757408		964.59	0.00247845		1494.59	0.05768398		2024.58	0.05839918		2554.58	0.01086366		3084.57	0.04012224		3614.57	0.01808006		4144.57	0.08775952
434.8	0.0067899		964.79	0.00343261		1494.79	0.05680872		2024.78	0.05733806		2554.78	0.00976033		3084.77	0.04057228		3614.77	0.01831515		4144.77	0.08738403
435	0.00587312		964.99	0.00326145		1494.99	0.05671058		2024.98	0.05761627		2554.98	0.00962664		3084.97	0.04066904		3614.97	0.01792063		4144.97	0.08698262
435.2	0.00494064		965.19	0.00276395		1495.19	0.05587011		2025.18	0.056726		2555.18	0.01016927		3085.17	0.03991973		3615.17	0.01706241		4145.17	0.08726891
435.4	0.00460298		965.39	0.00302559		1495.39	0.05519262		2025.38	0.057131		2555.38	0.01105109		3085.37	0.03970512		3615.37	0.01664173		4145.37	0.08644456
435.6	0.00448321		965.59	0.00366888		1495.59	0.0536863		2025.58	0.05680369		2555.58	0.01096959		3085.57	0.03973356		3615.57	0.01592591		4145.57	0.08693951
435.8	0.00417653		965.79	0.00407932		1495.79	0.0525813		2025.78	0.0569269		2555.78	0.01094062		3085.77	0.03935974		3615.77	0.01570554		4145.77	0.08659313
436	0.0046922		965.99	0.00338473		1495.99	0.05266227		2025.98	0.0574754		2555.98	0.01127706		3085.97	0.03914967		3615.97	0.01580872		4145.97	0.08679173
436.2	0.00475408		966.19	0.00420245		1496.19	0.05192031		2026.18	0.05734501		2556.18	0.01115552		3086.17	0.03986975		3616.17	0.01523372		4146.17	0.08626563
436.4	0.00479895		966.39	0.00455022		1496.39	0.05252917		2026.38	0.05816586		2556.38	0.01145462		3086.37	0.03998512		3616.37	0.01579178		4146.37	0.08629878
436.6	0.00522155		966.59	0.00445084		1496.59	0.05330509		2026.58	0.05850964		2556.58	0.01130991		3086.57	0.04097883		3616.57	0.0156801		4146.57	0.08655369
436.8	0.00564076		966.79	0.00396445		1496.79	0.05357609		2026.78	0.05898541		2556.78	0.01104241		3086.77	0.0411324		3616.77	0.01522447		4146.77	0.08656412
437	0.00530657		966.99	0.00327215		1496.99	0.05315854		2026.98	0.06036703		2556.98	0.01052682		3086.97	0.04139329		3616.97	0.01526446		4146.97	0.08676032
437.2	0.00533215		967.19	0.0028323		1497.19	0.05392104		2027.18	0.06091858		2557.18	0.01008692		3087.17	0.04129136		3617.17	0.01573245		4147.17	0.08733839
437.4	0.00521233		967.39	0.00239536		1497.39	0.05412034		2027.38	0.0615321		2557.38	0.00978941		3087.37	0.04141374		3617.37	0.01579099		4147.37	0.08747667
437.6	0.00557399		967.59	0.00282415		1497.59	0.05433864		2027.58	0.06080418		2557.58	0.0096101		3087.57	0.04252689		3617.57	0.01557328		4147.57	0.08683291
437.8	0.00536064		967.79	0.00290325		1497.79	0.05517191		2027.78	0.06000181		2557.78	0.00883185		3087.77	0.04220904		3617.77	0.0158383		4147.77	0.08742487
438	0.00553306		967.99	0.00255169		1497.99	0.05574137		2027.98	0.05962373		2557.98	0.00899815		3087.97	0.04210952		3617.97	0.01658161		4147.97	0.08683052
438.2	0.00523564		968.19	0.00209309		1498.19	0.05547004		2028.18	0.05994961		2558.18	0.00943297		3088.17	0.04290306		3618.17	0.01595352		4148.17	0.08634479
438.4	0.00441027		968.39	0.00196491		1498.39	0.05610238		2028.38	0.06011918		2558.38	0.00949867		3088.37	0.04332112		3618.37	0.01658637		4148.37	0.0863095
438.6	0.00349874		968.59	0.00343711		1498.59	0.05581318		2028.58	0.05999055		2558.58	0.00934567		3088.57	0.04298717		3618.57	0.01648078		4148.57	0.08612343
438.8	0.00274605		968.79	0.00397526		1498.79	0.05598775		2028.78	0.05939906		2558.78	0.00879218		3088.77	0.0428727		3618.77	0.01583804		4148.77	0.08549276
439	0.00293547		968.99	0.00473082		1498.99	0.05552414		2028.98	0.06004869		2558.98	0.00981036		3088.97	0.04204153		3618.97	0.01581923		4148.97	0.08558797
439.2	0.00245913		969.19	0.00519806		1499.19	0.05528997		2029.18	0.05980328		2559.18	0.01063054		3089.17	0.04164308		3619.17	0.01528926		4149.17	0.08539856
439.4	0.0036204		969.39	0.0058172		1499.39	0.05570643		2029.38	0.06063671		2559.38	0.01130742		3089.37	0.04179565		3619.37	0.01555172		4149.37	0.0850651
439.6	0.00421761		969.59	0.00580809		1499.59	0.05591651		2029.58	0.06067973		2559.58	0.01163711		3089.57	0.04175144		3619.57	0.01565376		4149.57	0.08604357
439.8	0.00489899		969.79	0.00565173		1499.79	0.05586585		2029.78	0.06069465		2559.78	0.01213848		3089.77	0.04171915		3619.77	0.01575296		4149.77	0.08637363
440	0.00490959		969.99	0.0046195		1499.99	0.05645121		2029.98	0.06082072		2559.98	0.01237593		3089.97	0.04139724		3619.97	0.01584987		4149.97	0.08633854
440.2	0.00423397		970.19	0.00410959		1500.19	0.05605556		2030.18	0.06054771		2560.18	0.01244858		3090.17	0.0411715		3620.17	0.01560505		4150.17	0.08655182
440.4	0.00440784		970.39	0.00355072		1500.39	0.05598075		2030.38	0.06021527		2560.38	0.01213691		3090.37	0.04064063		3620.37	0.01602789		4150.37	0.08714754
440.6	0.00466744		970.59	0.00295193		1500.59	0.05558033		2030.58	0.05969146		2560.58	0.01155112		3090.57	0.04106692		3620.57	0.01534369		4150.57	0.0871214
440.8	0.00379686		970.79	0.00237239		1500.79	0.05549552		2030.78	0.05980717		2560.78	0.01113734		3090.77	0.04031666		3620.77	0.0151593		4150.77	0.08704038
441	0.00327374		970.99	0.00203524		1500.99	0.05521452		2030.98	0.06004127		2560.98	0.01028249		3090.97	0.04028647		3620.97	0.01506761		4150.97	0.08795088
441.2	0.00345836		971.19	0.00129472		1501.19	0.05511861		2031.18	0.05978684		2561.18	0.01011812		3091.17	0.03952793		3621.17	0.01516168		4151.17	0.08810694
441.4	0.00434269		971.39	0.00053774		1501.39	0.05446165		2031.38	0.05973068		2561.38	0.01009393		3091.37	0.03970682		3621.37	0.01499898		4151.37	0.08827308
441.6	0.00416502		971.59	0.0004359		1501.59	0.05408054		2031.58	0.05899528		2561.58	0.0094965		3091.57	0.04009716		3621.57	0.01450289		4151.57	0.0888481
441.8	0.0037153		971.79	0.00005764		1501.79	0.05362407		2031.78	0.05861056		2561.78	0.00895915		3091.77	0.03977442		3621.77	0.01482074		4151.77	0.09005155
442	0.00359837		971.99	-0.00080465		1501.99	0.05312685		2031.98	0.05905579		2561.98	0.00867195		3091.97	0.03988362		3621.97	0.01476211		4151.97	0.0892915
442.2	0.0033088		972.19	-0.00063794		1502.19	0.05304425		2032.18	0.05922087		2562.18	0.00844206		3092.17	0.04041877		3622.17	0.01405589		4152.17	0.08958161
442.4	0.00256584		972.39	0.00012232		1502.39	0.05336377		2032.38	0.05971083		2562.38	0.00822293		3092.37	0.04015337		3622.37	0.01471602		4152.37	0.08898798
442.6	0.00185397		972.59	0.00091573		1502.59	0.05338582		2032.58	0.05988167		2562.58	0.00817368		3092.57	0.04101133		3622.57	0.0153287		4152.57	0.08923474
442.8	0.00167671		972.79	0.0010357		1502.79	0.05351999		2032.78	0.05956032		2562.78	0.00787775		3092.77	0.04191691		3622.77	0.01573199		4152.77	0.08834043
443	0.00186511		972.99	0.00229224		1502.99	0.05290857		2032.98	0.05961369		2562.98	0.00923946		3092.97	0.04222131		3622.97	0.01682846		4152.97	0.08810161
443.2	0.00211333		973.19	0.00209052		1503.19	0.05350244		2033.18	0.05890852		2563.18	0.00998676		3093.17	0.04206622		3623.17	0.01716661		4153.17	0.08763952
443.4	0.0027105		973.39	0.00213971		1503.39	0.05410875		2033.38	0.05882293		2563.38	0.00976608		3093.37	0.04271081		3623.37	0.01785637		4153.37	0.08758573
443.6	0.00269318		973.59	0.00203259		1503.59	0.05464682		2033.58	0.05849837		2563.58	0.00979155		3093.57	0.04244395		3623.57	0.01772901		4153.57	0.08723815
443.8	0.0034523		973.79	0.00175489		1503.79	0.05465398		2033.78	0.05741651		2563.78	0.00992721		3093.77	0.04272914		3623.77	0.01807733		4153.77	0.08748361
444	0.00292156		973.99	0.00058466		1503.99	0.05498902		2033.98	0.05671866		2563.98	0.00972126		3093.97	0.04284064		3623.97	0.01846603		4153.97	0.08708046
444.2	0.00339985		974.19	0.00040348		1504.19	0.05443168		2034.18	0.05633195		2564.18	0.00975508		3094.17	0.04198902		3624.17	0.01790463		4154.17	0.08684895
444.4	0.00446254		974.39	0.00205108		1504.39	0.05451916		2034.38	0.05585279		2564.38	0.00973783		3094.37	0.04180935		3624.37	0.01747353		4154.37	0.08640278
444.6	0.00410192		974.59	0.00298971		1504.59	0.05432513		2034.58	0.05607118		2564.58	0.01067398		3094.57	0.04158928		3624.57	0.01747196		4154.57	0.08615537
444.8	0.00425577		974.79	0.00332249		1504.79	0.05473529		2034.78	0.05544321		2564.78	0.01079864		3094.77	0.04038325		3624.77	0.01775098		4154.77	0.08708835
445	0.00449316		974.99	0.00325472		1504.99	0.0542084		2034.98	0.05508557		2564.98	0.01043362		3094.97	0.03929543		3624.97	0.01794677		4154.97	0.08800863
445.2	0.00498609		975.19	0.0031934		1505.19	0.05407258		2035.18	0.0554316		2565.18	0.01076341		3095.17	0.03871897		3625.17	0.01758627		4155.17	0.08799399
445.4	0.0051138		975.39	0.00210341		1505.39	0.05350203		2035.38	0.05552971		2565.38	0.01073064		3095.37	0.03842854		3625.37	0.01695547		4155.37	0.08848197
445.6	0.00513438		975.59	0.00197726		1505.59	0.05381843		2035.58	0.05595125		2565.58	0.01065463		3095.57	0.03830036		3625.57	0.0160154		4155.57	0.08938726
445.8	0.00484461		975.79	0.00139387		1505.79	0.05409168		2035.78	0.05634181		2565.78	0.01068424		3095.77	0.03786078		3625.77	0.01586459		4155.77	0.08898201
446	0.00488087		975.99	0.00116324		1505.99	0.05394272		2035.98	0.05714781		2565.98	0.01061829		3095.97	0.03727888		3625.97	0.01498019		4155.97	0.0888815
446.2	0.00438231		976.19	0.00054649		1506.19	0.05444456		2036.18	0.05735976		2566.18	0.01023379		3096.17	0.03745808		3626.17	0.01500588		4156.17	0.0898116
446.4	0.00379152		976.39	0.00077068		1506.39	0.05542302		2036.38	0.05795733		2566.38	0.01111442		3096.37	0.03708937		3626.37	0.0156189		4156.37	0.08879291
446.6	0.00389042		976.59	0.00142287		1506.59	0.05579096		2036.58	0.05819425		2566.58	0.01139475		3096.57	0.03750657		3626.57	0.01615957		4156.57	0.08837507
446.8	0.00354486		976.79	0.00090049		1506.79	0.05587205		2036.78	0.05787327		2566.78	0.01120538		3096.77	0.03695614		3626.77	0.01634677		4156.77	0.08803311
447	0.00406725		976.99	0.00081153		1506.99	0.05645166		2036.98	0.05719122		2566.98	0.0119019		3096.97	0.03621648		3626.97	0.01654398		4156.97	0.08769187
447.2	0.00390314		977.19	0.00033288		1507.19	0.05712488		2037.18	0.05701274		2567.18	0.01182419		3097.17	0.0361754		3627.17	0.01629427		4157.17	0.08738299
447.4	0.00384646		977.39	0.00012884		1507.39	0.05826505		2037.38	0.05722612		2567.38	0.01107099		3097.37	0.03704771		3627.37	0.01652467		4157.37	0.08587589
447.6	0.00371335		977.59	-0.00028631		1507.59	0.05874717		2037.58	0.05732202		2567.58	0.01068463		3097.57	0.03730117		3627.57	0.0164838		4157.57	0.08522015
447.8	0.00404502		977.79	-0.00099451		1507.79	0.05852923		2037.78	0.05668695		2567.78	0.01071422		3097.77	0.03774765		3627.77	0.01675014		4157.77	0.08624142
448	0.00408256		977.99	-0.00171169		1507.99	0.05822801		2037.98	0.0570712		2567.98	0.01048035		3097.97	0.0382075		3627.97	0.01528892		4157.97	0.08563222
448.2	0.00416075		978.19	-0.00142055		1508.19	0.0577113		2038.18	0.0572516		2568.18	0.0105111		3098.17	0.03830031		3628.17	0.01480827		4158.17	0.08506475
448.4	0.00411736		978.39	0.0002254		1508.39	0.05777878		2038.38	0.0569408		2568.38	0.01053688		3098.37	0.03894775		3628.37	0.01479512		4158.37	0.08482904
448.6	0.00329337		978.59	0.00051843		1508.59	0.05724113		2038.58	0.05701576		2568.58	0.01108416		3098.57	0.03879791		3628.57	0.01580633		4158.57	0.08489375
448.8	0.00281258		978.79	0.0005323		1508.79	0.05647131		2038.78	0.05707898		2568.78	0.01059545		3098.77	0.03847845		3628.77	0.01535489		4158.77	0.08539152
449	0.00244865		978.99	0.00089882		1508.99	0.0557312		2038.98	0.05719121		2568.98	0.01020146		3098.97	0.03755505		3628.97	0.01479646		4158.97	0.08584222
449.2	0.00183703		979.19	0.00104717		1509.19	0.05569096		2039.18	0.05689132		2569.18	0.01008687		3099.17	0.03842192		3629.17	0.01453059		4159.17	0.08638165
449.4	0.00228189		979.39	0.00108415		1509.39	0.05559571		2039.38	0.0572223		2569.38	0.00932252		3099.37	0.03817205		3629.37	0.01411032		4159.37	0.08699127
449.6	0.00206449		979.59	0.00149535		1509.59	0.0556041		2039.58	0.05741731		2569.58	0.00931052		3099.57	0.03843734		3629.57	0.01357234		4159.57	0.08708124
449.8	0.00201276		979.79	0.0025016		1509.79	0.05548641		2039.78	0.05777025		2569.78	0.01031103		3099.77	0.03928359		3629.77	0.01347576		4159.77	0.0874615
450	0.00264823		979.99	0.00270092		1509.99	0.05513576		2039.98	0.0575444		2569.98	0.01104459		3099.97	0.03927974		3629.97	0.01285418		4159.97	0.08863135
450.2	0.00305398		980.19	0.00209048		1510.19	0.05552529		2040.18	0.05794375		2570.18	0.01189629		3100.17	0.03906306		3630.17	0.01345133		4160.17	0.08875431
450.4	0.00361926		980.39	0.00241795		1510.39	0.055248		2040.38	0.05791949		2570.38	0.01329812		3100.37	0.03928481		3630.37	0.01316078		4160.37	0.08805894
450.6	0.00364786		980.59	0.00221751		1510.59	0.05460277		2040.58	0.05825355		2570.58	0.01287005		3100.57	0.03927886		3630.57	0.01311306		4160.57	0.08841652
450.8	0.00334346		980.79	0.00141283		1510.79	0.05507386		2040.78	0.05769707		2570.78	0.01344563		3100.77	0.03899036		3630.77	0.01393597		4160.77	0.08842125
451	0.00371774		980.99	0.00180204		1510.99	0.05496135		2040.98	0.05742953		2570.98	0.01297084		3100.97	0.03953432		3630.97	0.01280734		4160.97	0.08834904
451.2	0.00317922		981.19	0.00205254		1511.19	0.05458844		2041.18	0.05778114		2571.18	0.01242608		3101.17	0.04034399		3631.17	0.01165676		4161.17	0.08745786
451.4	0.00329966		981.39	0.00126219		1511.39	0.05389171		2041.38	0.05782348		2571.38	0.01251616		3101.37	0.04110502		3631.37	0.01201252		4161.37	0.08675428
451.6	0.00220463		981.59	0.00054733		1511.59	0.05309696		2041.58	0.05748208		2571.58	0.01220959		3101.57	0.0422745		3631.57	0.01197382		4161.57	0.08730643
451.8	0.00232546		981.79	-0.00026836		1511.79	0.05196247		2041.78	0.05702821		2571.78	0.0117033		3101.77	0.04183363		3631.77	0.01189326		4161.77	0.08753945
452	0.00205674		981.99	-0.00124227		1511.99	0.05099637		2041.98	0.0571144		2571.98	0.01085898		3101.97	0.04222827		3631.97	0.01201633		4161.97	0.08671315
452.2	0.00205091		982.19	-0.00102818		1512.19	0.04996865		2042.18	0.05686325		2572.18	0.01064448		3102.17	0.04200855		3632.17	0.01312284		4162.17	0.08681364
452.4	0.00220694		982.39	-0.00142445		1512.39	0.04947134		2042.38	0.0565024		2572.38	0.00984661		3102.37	0.04167806		3632.37	0.01357522		4162.37	0.08662529
452.6	0.00173214		982.59	-0.00225548		1512.59	0.04872803		2042.58	0.05628375		2572.58	0.00879855		3102.57	0.04118882		3632.57	0.01368783		4162.57	0.08684578
452.8	0.00127684		982.79	-0.00287381		1512.79	0.04788041		2042.78	0.0557747		2572.78	0.0076685		3102.77	0.04035655		3632.77	0.01315474		4162.77	0.08702329
453	0.00104102		982.99	-0.00265664		1512.99	0.04899594		2042.98	0.05565079		2572.98	0.0064399		3102.97	0.03990844		3632.97	0.01369924		4162.97	0.08781179
453.2	0.0000021		983.19	-0.00211376		1513.19	0.04899896		2043.18	0.05513733		2573.18	0.00521236		3103.17	0.03980094		3633.17	0.01425763		4163.17	0.08853625
453.4	0.00013248		983.39	-0.00246524		1513.39	0.04892802		2043.38	0.05577942		2573.38	0.00534265		3103.37	0.03848054		3633.37	0.01456333		4163.37	0.08912987
453.6	-0.00006137		983.59	-0.00287045		1513.59	0.04860164		2043.58	0.05556746		2573.58	0.00620225		3103.57	0.03850446		3633.57	0.01499303		4163.57	0.08899604
453.8	-0.00012193		983.79	-0.0026913		1513.79	0.04951733		2043.78	0.05515046		2573.78	0.00730253		3103.77	0.03895065		3633.77	0.01514695		4163.77	0.08958275
454	0.00001902		983.99	-0.00333762		1513.99	0.04936659		2043.98	0.05511856		2573.98	0.0070699		3103.97	0.03826961		3633.97	0.01629325		4163.97	0.08973821
454.2	0.00025907		984.19	-0.0028485		1514.19	0.04970703		2044.18	0.05588772		2574.18	0.00727503		3104.17	0.03780613		3634.17	0.01704111		4164.17	0.08909533
454.4	0.00021473		984.39	-0.0030231		1514.39	0.05035282		2044.38	0.05640132		2574.38	0.00730603		3104.37	0.0385553		3634.37	0.01755661		4164.37	0.08882103
454.6	0.00084661		984.59	-0.00281167		1514.59	0.05074231		2044.58	0.05635196		2574.58	0.00707653		3104.57	0.03724142		3634.57	0.01800863		4164.57	0.0881993
454.8	0.00060756		984.79	-0.00248549		1514.79	0.05222987		2044.78	0.0562481		2574.78	0.00816203		3104.77	0.03717692		3634.77	0.01768622		4164.77	0.08681551
455	0.0011952		984.99	-0.00137094		1514.99	0.05194253		2044.98	0.05692133		2574.98	0.00856802		3104.97	0.03739114		3634.97	0.01669191		4164.97	0.0865776
455.2	0.00167379		985.19	-0.00023231		1515.19	0.05186337		2045.18	0.05690364		2575.18	0.00966481		3105.17	0.03792435		3635.17	0.01713233		4165.17	0.08522924
455.4	0.00202186		985.39	0.00005483		1515.39	0.0509273		2045.38	0.05603982		2575.38	0.01033799		3105.37	0.03843935		3635.37	0.01812016		4165.37	0.08594902
455.6	0.00192159		985.59	0.00083553		1515.59	0.05108676		2045.58	0.05601004		2575.58	0.01037349		3105.57	0.03936492		3635.57	0.01830066		4165.57	0.08566251
455.8	0.00318116		985.79	0.00117786		1515.79	0.05133195		2045.78	0.05614323		2575.78	0.00960814		3105.77	0.03928912		3635.77	0.01804717		4165.77	0.08556727
456	0.00394503		985.99	0.0013599		1515.99	0.05173924		2045.98	0.05579354		2575.98	0.00994962		3105.97	0.03979957		3635.97	0.01745291		4165.97	0.08539631
456.2	0.0048298		986.19	0.0019807		1516.19	0.05173668		2046.18	0.05578698		2576.18	0.00957516		3106.17	0.04051455		3636.17	0.01738105		4166.17	0.08574837
456.4	0.00416311		986.39	0.00078549		1516.39	0.05208827		2046.38	0.05505864		2576.38	0.00903142		3106.37	0.04094975		3636.37	0.0166891		4166.37	0.08585447
456.6	0.00355927		986.59	0.00078214		1516.59	0.05257732		2046.58	0.05472931		2576.58	0.00833458		3106.57	0.04067852		3636.57	0.01537057		4166.57	0.08642946
456.8	0.00307971		986.79	0.00064501		1516.79	0.05274408		2046.78	0.0550715		2576.78	0.00825856		3106.77	0.04009371		3636.77	0.01507368		4166.77	0.08685973
457	0.00205633		986.99	0.00003136		1516.99	0.0530828		2046.98	0.05594787		2576.98	0.00767327		3106.97	0.04041723		3636.97	0.01530005		4166.97	0.08774841
457.2	0.00060436		987.19	0.00035484		1517.19	0.05281493		2047.18	0.05658661		2577.18	0.00729479		3107.17	0.03947814		3637.17	0.0158885		4167.17	0.08789997
457.4	0.00047053		987.39	-0.00049243		1517.39	0.0532632		2047.38	0.0571225		2577.38	0.00841339		3107.37	0.03878476		3637.37	0.01604307		4167.37	0.08782362
457.6	0.00020448		987.59	-0.00053625		1517.59	0.05409189		2047.58	0.05728073		2577.58	0.00812424		3107.57	0.03929286		3637.57	0.01505576		4167.57	0.08760413
457.8	-0.00057352		987.79	-0.00115717		1517.79	0.05508119		2047.78	0.05657552		2577.78	0.00849829		3107.77	0.03968815		3637.77	0.01479968		4167.77	0.0873923
458	-0.00059131		987.99	-0.00116726		1517.99	0.0539404		2047.98	0.05694593		2577.98	0.00863904		3107.97	0.03895844		3637.97	0.01520811		4167.97	0.08751569
458.2	-0.0005863		988.19	-0.00165603		1518.19	0.05451277		2048.18	0.05666837		2578.18	0.00867512		3108.17	0.03810547		3638.17	0.01491388		4168.17	0.08716457
458.4	-0.00118824		988.39	-0.00243328		1518.39	0.0548843		2048.38	0.05676728		2578.38	0.00899161		3108.37	0.0380857		3638.37	0.01431666		4168.37	0.08697254
458.6	-0.00050494		988.59	-0.00180727		1518.59	0.05411581		2048.58	0.05590294		2578.58	0.010264		3108.57	0.03775442		3638.57	0.01400259		4168.57	0.08593826
458.8	-0.00015201		988.79	-0.00172872		1518.79	0.0538583		2048.78	0.05521964		2578.78	0.01117363		3108.77	0.03801588		3638.77	0.01366483		4168.77	0.08533755
459	0.00125121		988.99	-0.00144541		1518.99	0.05265942		2048.98	0.05536013		2578.98	0.01172811		3108.97	0.0373765		3638.97	0.0142245		4168.97	0.08509313
459.2	0.001647		989.19	-0.0007943		1519.19	0.05204585		2049.18	0.05470168		2579.18	0.01234709		3109.17	0.0380846		3639.17	0.01468433		4169.17	0.08500153
459.4	0.0028113		989.39	-0.00170746		1519.39	0.05167325		2049.38	0.05426181		2579.38	0.01209725		3109.37	0.03834576		3639.37	0.0151052		4169.37	0.08526152
459.6	0.00386306		989.59	-0.00140004		1519.59	0.05155326		2049.58	0.05545994		2579.58	0.01147499		3109.57	0.03942558		3639.57	0.01504907		4169.57	0.08476367
459.8	0.00488076		989.79	-0.00113344		1519.79	0.05179902		2049.78	0.05551348		2579.78	0.01045471		3109.77	0.03988503		3639.77	0.01518522		4169.77	0.08496904
460	0.00539985		989.99	-0.00050583		1519.99	0.05210924		2049.98	0.05558225		2579.98	0.01060006		3109.97	0.03930327		3639.97	0.01518012		4169.97	0.08424685
460.2	0.0050692		990.19	-0.00001258		1520.19	0.05146375		2050.18	0.05583878		2580.18	0.00933777		3110.17	0.03958535		3640.17	0.01584074		4170.17	0.08489902
460.4	0.00439849		990.39	-0.00032395		1520.39	0.05179857		2050.38	0.05600457		2580.38	0.00877256		3110.37	0.03908672		3640.37	0.01572611		4170.37	0.08513745
460.6	0.00412933		990.59	0.00007156		1520.59	0.05236169		2050.58	0.05703395		2580.58	0.00789021		3110.57	0.03935118		3640.57	0.01581821		4170.57	0.08546872
460.8	0.00442965		990.79	0.00054972		1520.79	0.05294371		2050.78	0.05826839		2580.78	0.00753292		3110.77	0.03960493		3640.77	0.01640663		4170.77	0.08605729
461	0.00373739		990.99	0.00024583		1520.99	0.05300324		2050.98	0.05894612		2580.98	0.00653474		3110.97	0.04016996		3640.97	0.01672278		4170.97	0.08610756
461.2	0.00301911		991.19	0.00081293		1521.19	0.0532473		2051.18	0.05938043		2581.18	0.00628591		3111.17	0.04040401		3641.17	0.01690146		4171.17	0.08561601
461.4	0.00311357		991.39	0.00077763		1521.39	0.05371719		2051.38	0.05877682		2581.38	0.00655602		3111.37	0.03991525		3641.37	0.01583787		4171.37	0.08533393
461.6	0.00237783		991.59	0.00058013		1521.59	0.05344142		2051.58	0.05844161		2581.58	0.00636119		3111.57	0.04012133		3641.57	0.01446115		4171.57	0.08525806
461.8	0.00143127		991.79	-0.00007565		1521.79	0.05292613		2051.78	0.05746193		2581.78	0.00641004		3111.77	0.04072804		3641.77	0.01377575		4171.77	0.08541857
462	0.0014158		991.99	0.00069258		1521.99	0.05253221		2051.98	0.05747729		2581.98	0.00692503		3111.97	0.04038951		3641.97	0.01313991		4171.97	0.08560089
462.2	0.00093005		992.19	0.00046269		1522.19	0.05346373		2052.18	0.05718609		2582.18	0.0067255		3112.17	0.04007904		3642.17	0.01248603		4172.17	0.08530529
462.4	0.00062471		992.39	0.00114644		1522.39	0.05356349		2052.38	0.05730932		2582.38	0.00702854		3112.37	0.04032413		3642.37	0.01208485		4172.37	0.08567996
462.6	0.00109455		992.59	0.00117923		1522.59	0.05297658		2052.58	0.05675995		2582.58	0.00806429		3112.57	0.04064167		3642.57	0.01180411		4172.57	0.08540775
462.8	0.00059899		992.79	0.00013256		1522.79	0.05274123		2052.78	0.05669029		2582.78	0.00885522		3112.77	0.03971965		3642.77	0.01183446		4172.77	0.0854042
463	0.00068138		992.99	-0.0005091		1522.99	0.0527353		2052.98	0.056844		2582.98	0.00892378		3112.97	0.0390136		3642.97	0.01192568		4172.97	0.08547843
463.2	0.00057681		993.19	-0.00060369		1523.19	0.05261247		2053.18	0.05715505		2583.18	0.00956814		3113.17	0.03970246		3643.17	0.0124167		4173.17	0.08564876
463.4	0.0016503		993.39	-0.00192709		1523.39	0.05296255		2053.38	0.05739351		2583.38	0.0094463		3113.37	0.03961304		3643.37	0.01320292		4173.37	0.08587287
463.6	0.0017226		993.59	-0.00164988		1523.59	0.05317834		2053.58	0.05773482		2583.58	0.00916933		3113.57	0.03930562		3643.57	0.01370997		4173.57	0.08655649
463.8	0.00146081		993.79	-0.00113044		1523.79	0.05406678		2053.78	0.05724777		2583.78	0.01019775		3113.77	0.03834471		3643.77	0.01364443		4173.77	0.08713181
464	0.00098783		993.99	-0.0009051		1523.99	0.05422908		2053.98	0.05767606		2583.98	0.00995144		3113.97	0.03751378		3643.97	0.01370523		4173.97	0.08743355
464.2	0.0008712		994.19	-0.00079195		1524.19	0.05407756		2054.18	0.05750565		2584.18	0.00996702		3114.17	0.03751997		3644.17	0.01409635		4174.17	0.08840551
464.4	0.00117325		994.39	-0.00126416		1524.39	0.05483834		2054.38	0.05777952		2584.38	0.01007245		3114.37	0.03755512		3644.37	0.01423749		4174.37	0.08896511
464.6	0.00117473		994.59	-0.00101758		1524.59	0.0549572		2054.58	0.05751118		2584.58	0.01058465		3114.57	0.03760604		3644.57	0.01515079		4174.57	0.08957311
464.8	0.00203713		994.79	-0.0010422		1524.79	0.05457524		2054.78	0.05738958		2584.78	0.01010933		3114.77	0.03731092		3644.77	0.01505546		4174.77	0.08978544
465	0.00234854		994.99	-0.00120902		1524.99	0.0539765		2054.98	0.05671557		2584.98	0.0103095		3114.97	0.03681536		3644.97	0.01496593		4174.97	0.08901671
465.2	0.00313894		995.19	-0.00117359		1525.19	0.0528753		2055.18	0.05635892		2585.18	0.01013418		3115.17	0.0376661		3645.17	0.01437338		4175.17	0.08902398
465.4	0.00313233		995.39	0.00024548		1525.39	0.05302306		2055.38	0.05646897		2585.38	0.00934311		3115.37	0.0366435		3645.37	0.01440962		4175.37	0.0882166
465.6	0.00322878		995.59	0.00052533		1525.59	0.05218725		2055.58	0.05675238		2585.58	0.00884799		3115.57	0.03612981		3645.57	0.0146783		4175.57	0.0870251
465.8	0.00283032		995.79	0.00055956		1525.79	0.0522993		2055.78	0.05628084		2585.78	0.00860556		3115.77	0.03620462		3645.77	0.01422176		4175.77	0.08648461
466	0.00239657		995.99	0.00083601		1525.99	0.05197381		2055.98	0.05675112		2585.98	0.00884608		3115.97	0.03651726		3645.97	0.01388926		4175.97	0.08587286
466.2	0.00216825		996.19	0.00090012		1526.19	0.05217649		2056.18	0.05709327		2586.18	0.00835569		3116.17	0.03649644		3646.17	0.01307601		4176.17	0.08575956
466.4	0.00211946		996.39	0.00130841		1526.39	0.05211629		2056.38	0.05751596		2586.38	0.00825603		3116.37	0.03661396		3646.37	0.01324601		4176.37	0.08589655
466.6	0.00160642		996.59	0.00080095		1526.59	0.05149857		2056.58	0.05785687		2586.58	0.00827219		3116.57	0.03690583		3646.57	0.01262391		4176.57	0.08590743
466.8	0.00058556		996.79	0.00059853		1526.79	0.05158897		2056.78	0.05858621		2586.78	0.00924257		3116.77	0.03683601		3646.77	0.01260243		4176.77	0.08582119
467	0.00052847		996.99	0.00040982		1526.99	0.05228004		2056.98	0.05839479		2586.98	0.00779125		3116.97	0.0376427		3646.97	0.01290222		4176.97	0.08553523
467.2	0.00037474		997.19	0.00024094		1527.19	0.05290327		2057.18	0.05932781		2587.18	0.00765395		3117.17	0.03826353		3647.17	0.01337808		4177.17	0.08588733
467.4	0.00001074		997.39	-0.00103955		1527.39	0.05263356		2057.38	0.05898238		2587.38	0.00760074		3117.37	0.03853695		3647.37	0.01447509		4177.37	0.08631489
467.6	-0.0005181		997.59	-0.00185809		1527.59	0.0522693		2057.58	0.05805778		2587.58	0.0076008		3117.57	0.0384698		3647.57	0.01570462		4177.57	0.08676813
467.8	-0.00093595		997.79	-0.0025983		1527.79	0.05197498		2057.78	0.05799541		2587.78	0.00782731		3117.77	0.03941542		3647.77	0.01547177		4177.77	0.08581669
468	-0.00096878		997.99	-0.00384118		1527.99	0.05176934		2057.98	0.05851142		2587.98	0.00727942		3117.97	0.0393436		3647.97	0.01549833		4177.97	0.0864478
468.2	-0.00129838		998.19	-0.00434808		1528.19	0.05159153		2058.18	0.0579826		2588.18	0.00744403		3118.17	0.03934581		3648.17	0.01571069		4178.17	0.08696959
468.4	-0.00127491		998.39	-0.00505882		1528.39	0.05149828		2058.38	0.05902625		2588.38	0.00734766		3118.37	0.0390803		3648.37	0.0157661		4178.37	0.08709852
468.6	-0.00100503		998.59	-0.00458701		1528.59	0.0516632		2058.58	0.05906081		2588.58	0.00832406		3118.57	0.03813014		3648.57	0.01676391		4178.57	0.08636173
468.8	-0.00009845		998.79	-0.00407734		1528.79	0.05092193		2058.78	0.05948447		2588.78	0.00726952		3118.77	0.03841124		3648.77	0.01700648		4178.77	0.0861813
469	0.00018951		998.99	-0.003384		1528.99	0.05056506		2058.98	0.05856714		2588.98	0.00802976		3118.97	0.03783421		3648.97	0.01703318		4178.97	0.08576575
469.2	0.00016948		999.19	-0.00316782		1529.19	0.05039918		2059.18	0.05806877		2589.18	0.00769152		3119.17	0.03842394		3649.17	0.01696743		4179.17	0.08613529
469.4	0.00005799		999.39	-0.00237689		1529.39	0.0504378		2059.38	0.05813583		2589.38	0.00724703		3119.37	0.03756549		3649.37	0.01778663		4179.37	0.08550156
469.6	0.00005345		999.59	-0.00270957		1529.59	0.04973911		2059.58	0.05662845		2589.58	0.00756441		3119.57	0.03694543		3649.57	0.01751055		4179.57	0.08519529
469.8	-0.00030683		999.79	-0.00289293		1529.79	0.04963843		2059.78	0.05532446		2589.78	0.00809474		3119.77	0.03692498		3649.77	0.01662847		4179.77	0.08518558
470	0.0001361		999.99	-0.00224592		1529.99	0.04908288		2059.98	0.05541275		2589.98	0.00838565		3119.97	0.03754529		3649.97	0.01600503		4179.97	0.08563419
470.2	0.00039767		1000.19	-0.00151314		1530.19	0.04928356		2060.18	0.05477165		2590.18	0.00902724		3120.17	0.03698769		3650.17	0.01553792		4180.17	0.08598784
470.4	-0.00022196		1000.39	-0.00136018		1530.39	0.04974283		2060.38	0.05496485		2590.38	0.00901714		3120.37	0.03662438		3650.37	0.01563995		4180.37	0.08605274
470.6	-0.0006484		1000.59	-0.00104681		1530.59	0.05074217		2060.58	0.05525906		2590.58	0.00904708		3120.57	0.03738925		3650.57	0.014776		4180.57	0.08603271
470.8	-0.00126862		1000.79	-0.00121009		1530.79	0.05148762		2060.78	0.0547908		2590.78	0.00968141		3120.77	0.03734904		3650.77	0.01459819		4180.77	0.08600112
471	-0.00167552		1000.99	-0.00137682		1530.99	0.05190656		2060.98	0.05382428		2590.98	0.00853913		3120.97	0.03777087		3650.97	0.0146449		4180.97	0.08512858
471.2	-0.00208896		1001.19	-0.00206578		1531.19	0.05150492		2061.18	0.05483085		2591.18	0.00852068		3121.17	0.03820338		3651.17	0.01395812		4181.17	0.08591078
471.4	-0.00234274		1001.39	-0.00290141		1531.39	0.05116373		2061.38	0.05482896		2591.38	0.00861967		3121.37	0.03826691		3651.37	0.01432442		4181.37	0.08516123
471.6	-0.00225954		1001.59	-0.00314302		1531.59	0.05101025		2061.58	0.05508246		2591.58	0.00845913		3121.57	0.03887076		3651.57	0.01433081		4181.57	0.08527337
471.8	-0.00215647		1001.79	-0.00317764		1531.79	0.05163174		2061.78	0.05584146		2591.78	0.00776695		3121.77	0.03953283		3651.77	0.01337794		4181.77	0.08476817
472	-0.00271735		1001.99	-0.00286218		1531.99	0.05322955		2061.98	0.05608329		2591.98	0.00729545		3121.97	0.0388382		3651.97	0.01300667		4181.97	0.0857202
472.2	-0.00254396		1002.19	-0.00202606		1532.19	0.05300503		2062.18	0.0572092		2592.18	0.00662356		3122.17	0.03945669		3652.17	0.01241903		4182.17	0.08584166
472.4	-0.00157841		1002.39	-0.00240578		1532.39	0.05335747		2062.38	0.05831232		2592.38	0.00703001		3122.37	0.03943435		3652.37	0.01220852		4182.37	0.0849373
472.6	-0.00129778		1002.59	-0.00124353		1532.59	0.05363801		2062.58	0.05853418		2592.58	0.00800796		3122.57	0.0391089		3652.57	0.01239752		4182.57	0.08492652
472.8	-0.00122098		1002.79	-0.00089394		1532.79	0.05292317		2062.78	0.05847495		2592.78	0.00739016		3122.77	0.039076		3652.77	0.01261919		4182.77	0.08601216
473	-0.00053152		1002.99	-0.00092429		1532.99	0.0528298		2062.98	0.05798857		2592.98	0.00820888		3122.97	0.03876423		3652.97	0.011367		4182.97	0.08601027
473.2	-0.00054888		1003.19	-0.00072521		1533.19	0.05299839		2063.18	0.05857683		2593.18	0.00850817		3123.17	0.03927949		3653.17	0.01195773		4183.17	0.08662443
473.4	-0.00053396		1003.39	-0.00066817		1533.39	0.05197277		2063.38	0.05798391		2593.38	0.0085508		3123.37	0.03906543		3653.37	0.01201275		4183.37	0.08630604
473.6	-0.00066032		1003.59	-0.00102547		1533.59	0.05121872		2063.58	0.05728874		2593.58	0.00928946		3123.57	0.03812212		3653.57	0.01168207		4183.57	0.08561833
473.8	-0.00019612		1003.79	-0.00030331		1533.79	0.05134989		2063.78	0.05738349		2593.78	0.00956887		3123.77	0.03766073		3653.77	0.01209386		4183.77	0.08455342
474	0.00003968		1003.99	0.00049724		1533.99	0.05116189		2063.98	0.05684426		2593.98	0.01004137		3123.97	0.03781132		3653.97	0.01223842		4183.97	0.08443198
474.2	-0.00066617		1004.19	-0.00058243		1534.19	0.05113291		2064.18	0.05580718		2594.18	0.0100028		3124.17	0.03733396		3654.17	0.01265216		4184.17	0.08362183
474.4	-0.00130381		1004.39	-0.00149911		1534.39	0.05159292		2064.38	0.05572433		2594.38	0.00957543		3124.37	0.03689059		3654.37	0.01291384		4184.37	0.08349242
474.6	-0.00109625		1004.59	-0.00156338		1534.59	0.05097895		2064.58	0.05504244		2594.58	0.00978498		3124.57	0.03742911		3654.57	0.0135592		4184.57	0.08274525
474.8	-0.00123775		1004.79	-0.00251567		1534.79	0.05049055		2064.78	0.05456989		2594.78	0.00997355		3124.77	0.03671182		3654.77	0.01406911		4184.77	0.08302268
475	-0.00147253		1004.99	-0.00267164		1534.99	0.05048232		2064.98	0.054524		2594.98	0.01001469		3124.97	0.03717462		3654.97	0.01336698		4184.97	0.08319577
475.2	-0.00174826		1005.19	-0.00332944		1535.19	0.05031296		2065.18	0.05564837		2595.18	0.00978202		3125.17	0.03728112		3655.17	0.01370034		4185.17	0.08404213
475.4	-0.00156665		1005.39	-0.00335031		1535.39	0.0504239		2065.38	0.05595956		2595.38	0.00996544		3125.37	0.03669998		3655.37	0.0141625		4185.37	0.0841286
475.6	-0.00178082		1005.59	-0.00332086		1535.59	0.04995899		2065.58	0.05558112		2595.58	0.00972852		3125.57	0.03661936		3655.57	0.01381625		4185.57	0.08490082
475.8	-0.00161204		1005.79	-0.00352363		1535.79	0.05037197		2065.78	0.05495198		2595.78	0.00940192		3125.77	0.0365475		3655.77	0.01333096		4185.77	0.08520623
476	-0.00160773		1005.99	-0.00374311		1535.99	0.05035085		2065.98	0.0547989		2595.98	0.00940375		3125.97	0.03722094		3655.97	0.01326741		4185.97	0.08584384
476.2	-0.00036878		1006.19	-0.00364924		1536.19	0.04937726		2066.18	0.05569048		2596.18	0.00961372		3126.17	0.03795196		3656.17	0.01261645		4186.17	0.08612042
476.4	-0.00025408		1006.39	-0.00411623		1536.39	0.04904706		2066.38	0.05494628		2596.38	0.01001893		3126.37	0.03785713		3656.37	0.01214115		4186.37	0.08664638
476.6	-0.00032823		1006.59	-0.00331613		1536.59	0.04895252		2066.58	0.05526722		2596.58	0.01024251		3126.57	0.03715393		3656.57	0.01198777		4186.57	0.08800424
476.8	-0.0004188		1006.79	-0.00265407		1536.79	0.04913375		2066.78	0.05485422		2596.78	0.01030085		3126.77	0.03665225		3656.77	0.01229959		4186.77	0.08835909
477	-0.00062759		1006.99	-0.00281012		1536.99	0.04849317		2066.98	0.05560529		2596.98	0.00968018		3126.97	0.03679076		3656.97	0.01204992		4186.97	0.08805698
477.2	-0.0010636		1007.19	-0.00282941		1537.19	0.04817551		2067.18	0.05567268		2597.18	0.00899197		3127.17	0.03691206		3657.17	0.01289167		4187.17	0.08815215
477.4	-0.00068727		1007.39	-0.00240769		1537.39	0.04798232		2067.38	0.05605769		2597.38	0.00851796		3127.37	0.03660753		3657.37	0.01202689		4187.37	0.08677479
477.6	-0.00075681		1007.59	-0.00282083		1537.59	0.04805442		2067.58	0.05681075		2597.58	0.00890459		3127.57	0.03639186		3657.57	0.01236888		4187.57	0.08632358
477.8	-0.00031925		1007.79	-0.00172649		1537.79	0.04846323		2067.78	0.0566472		2597.78	0.00820759		3127.77	0.0368082		3657.77	0.01319929		4187.77	0.08619508
478	-0.00016931		1007.99	-0.0021139		1537.99	0.04828593		2067.98	0.05581263		2597.98	0.00815766		3127.97	0.03700048		3657.97	0.01310532		4187.97	0.08666222
478.2	-0.00078681		1008.19	-0.00318853		1538.19	0.04843761		2068.18	0.05598973		2598.18	0.00767224		3128.17	0.03670494		3658.17	0.01308379		4188.17	0.08668259
478.4	-0.00103298		1008.39	-0.00285754		1538.39	0.04944332		2068.38	0.0572661		2598.38	0.0070173		3128.37	0.03691006		3658.37	0.01337792		4188.37	0.08650206
478.6	-0.00067479		1008.59	-0.00216611		1538.59	0.0491826		2068.58	0.05726087		2598.58	0.00652933		3128.57	0.03693574		3658.57	0.01374494		4188.57	0.08571089
478.8	-0.00117404		1008.79	-0.00253799		1538.79	0.04980481		2068.78	0.05789141		2598.78	0.00684888		3128.77	0.03655022		3658.77	0.01328374		4188.77	0.08621072
479	-0.00134742		1008.99	-0.00161353		1538.99	0.05054265		2068.98	0.05796718		2598.98	0.0071373		3128.97	0.03731869		3658.97	0.01255611		4188.97	0.08633453
479.2	-0.00157743		1009.19	-0.0015081		1539.19	0.05073666		2069.18	0.05830805		2599.18	0.00688199		3129.17	0.03743639		3659.17	0.01357007		4189.17	0.08605679
479.4	-0.00228347		1009.39	-0.00117233		1539.39	0.05046308		2069.38	0.05887722		2599.38	0.00747043		3129.37	0.03691451		3659.37	0.01334737		4189.37	0.08627398
479.6	-0.00289722		1009.59	-0.00159069		1539.59	0.05089776		2069.58	0.05800562		2599.58	0.00783243		3129.57	0.03667718		3659.57	0.01266434		4189.57	0.08607331
479.8	-0.00301882		1009.79	-0.00162177		1539.79	0.05073756		2069.78	0.05765897		2599.78	0.00855734		3129.77	0.0371175		3659.77	0.01288461		4189.77	0.08652633
480	-0.00352751		1009.99	-0.00172067		1539.99	0.05073495		2069.98	0.0575399		2599.98	0.00965639		3129.97	0.03749657		3659.97	0.01321063		4189.97	0.08699435
480.2	-0.00292858		1010.19	-0.00176559		1540.19	0.05099936		2070.18	0.05710009		2600.18	0.00909421		3130.17	0.03690387		3660.17	0.01313935		4190.17	0.08598203
480.4	-0.00343027		1010.39	-0.00191128		1540.39	0.05128457		2070.38	0.05570462		2600.38	0.00965304		3130.37	0.03659146		3660.37	0.01326799		4190.37	0.08614625
480.6	-0.0040447		1010.59	-0.00254274		1540.59	0.05193189		2070.58	0.05595452		2600.58	0.01011175		3130.57	0.03561772		3660.57	0.01383456		4190.57	0.08592668
480.8	-0.0041234		1010.79	-0.00287869		1540.79	0.05240131		2070.78	0.05539507		2600.78	0.00973885		3130.77	0.0356856		3660.77	0.01427003		4190.77	0.08500822
481	-0.0038653		1010.99	-0.00383767		1540.99	0.05160347		2070.98	0.05574301		2600.98	0.00813401		3130.97	0.03583573		3660.97	0.01414549		4190.97	0.08475873
481.2	-0.00332442		1011.19	-0.00415756		1541.19	0.05166526		2071.18	0.05555738		2601.18	0.00908		3131.17	0.03575608		3661.17	0.01403598		4191.17	0.08452166
481.4	-0.00334041		1011.39	-0.00362825		1541.39	0.05193433		2071.38	0.05569551		2601.38	0.00947155		3131.37	0.03638299		3661.37	0.01406082		4191.37	0.08347572
481.6	-0.00387627		1011.59	-0.00378433		1541.59	0.05189126		2071.58	0.05536886		2601.58	0.00987496		3131.57	0.0368412		3661.57	0.01365608		4191.57	0.08360676
481.8	-0.00296823		1011.79	-0.00316829		1541.79	0.05213353		2071.78	0.05442789		2601.78	0.00996774		3131.77	0.03707289		3661.77	0.01380235		4191.77	0.08287048
482	-0.00234314		1011.99	-0.00287332		1541.99	0.05245096		2071.98	0.05419681		2601.98	0.01017812		3131.97	0.03733196		3661.97	0.01332989		4191.97	0.08337731
482.2	-0.00333163		1012.19	-0.00256955		1542.19	0.05261734		2072.18	0.05441732		2602.18	0.00968776		3132.17	0.0371669		3662.17	0.01305658		4192.17	0.08319702
482.4	-0.00296307		1012.39	-0.00187445		1542.39	0.05227937		2072.38	0.05469967		2602.38	0.00973146		3132.37	0.03768153		3662.37	0.01331531		4192.37	0.08221033
482.6	-0.00241491		1012.59	-0.0020505		1542.59	0.05090309		2072.58	0.0545386		2602.58	0.0098397		3132.57	0.03748948		3662.57	0.01320316		4192.57	0.08181838
482.8	-0.00128616		1012.79	-0.00102896		1542.79	0.05145973		2072.78	0.05500263		2602.78	0.00968812		3132.77	0.03824687		3662.77	0.01396544		4192.77	0.0829712
483	0.00040709		1012.99	0.00031546		1542.99	0.05182535		2072.98	0.05522602		2602.98	0.0095146		3132.97	0.03848524		3662.97	0.01382922		4192.97	0.08290575
483.2	0.00048714		1013.19	0.00024717		1543.19	0.05184958		2073.18	0.05566646		2603.18	0.009608		3133.17	0.03823023		3663.17	0.01476182		4193.17	0.083335
483.4	0.00038829		1013.39	0.00063595		1543.39	0.0524158		2073.38	0.05596061		2603.38	0.00995304		3133.37	0.03791651		3663.37	0.01489774		4193.37	0.08413043
483.6	0.00046094		1013.59	0.00023802		1543.59	0.05301642		2073.58	0.05602187		2603.58	0.01015784		3133.57	0.03717855		3663.57	0.01470924		4193.57	0.08425399
483.8	0.00043477		1013.79	0.00023003		1543.79	0.05246667		2073.78	0.05634054		2603.78	0.01051842		3133.77	0.03719034		3663.77	0.01419165		4193.77	0.08476228
484	0.00123084		1013.99	-0.00025599		1543.99	0.05225465		2073.98	0.05637172		2603.98	0.01032056		3133.97	0.03640893		3663.97	0.01394977		4193.97	0.08459584
484.2	0.00146325		1014.19	-0.00180441		1544.19	0.05255125		2074.18	0.05613171		2604.18	0.00862487		3134.17	0.03577934		3664.17	0.01362575		4194.17	0.08387936
484.4	0.00139258		1014.39	-0.00272442		1544.39	0.05251759		2074.38	0.05599807		2604.38	0.00918599		3134.37	0.03600313		3664.37	0.0131544		4194.37	0.08414703
484.6	0.00110637		1014.59	-0.00360272		1544.59	0.05195796		2074.58	0.05648223		2604.58	0.00817249		3134.57	0.03542707		3664.57	0.0130757		4194.57	0.08398816
484.8	0.00106317		1014.79	-0.00420753		1544.79	0.0511327		2074.78	0.05647737		2604.78	0.00697019		3134.77	0.03562777		3664.77	0.01300147		4194.77	0.08367895
485	0.00057805		1014.99	-0.00410663		1544.99	0.05024423		2074.98	0.05691224		2604.98	0.00696264		3134.97	0.03571381		3664.97	0.01234534		4194.97	0.08375207
485.2	-0.00003219		1015.19	-0.00449249		1545.19	0.05056142		2075.18	0.05633761		2605.18	0.00798066		3135.17	0.03576919		3665.17	0.01202129		4195.17	0.08236473
485.4	-0.000617		1015.39	-0.00412592		1545.39	0.05000745		2075.38	0.05557172		2605.38	0.00777151		3135.37	0.03693136		3665.37	0.01244259		4195.37	0.08148305
485.6	-0.00053445		1015.59	-0.00357776		1545.59	0.04992469		2075.58	0.05555784		2605.58	0.00830753		3135.57	0.03692047		3665.57	0.01281369		4195.57	0.08194872
485.8	-0.00115595		1015.79	-0.00366477		1545.79	0.04936525		2075.78	0.05507748		2605.78	0.00841436		3135.77	0.03696862		3665.77	0.01366305		4195.77	0.0810178
486	-0.00216511		1015.99	-0.00357602		1545.99	0.04831677		2075.98	0.0547918		2605.98	0.00797841		3135.97	0.03774943		3665.97	0.01399866		4195.97	0.08198668
486.2	-0.00367944		1016.19	-0.00397292		1546.19	0.04732987		2076.18	0.05427254		2606.18	0.00824962		3136.17	0.03800989		3666.17	0.01375961		4196.17	0.08091249
486.4	-0.0030529		1016.39	-0.00423944		1546.39	0.0465809		2076.38	0.0549616		2606.38	0.00848128		3136.37	0.03841399		3666.37	0.01460122		4196.37	0.08009564
486.6	-0.00279191		1016.59	-0.00395291		1546.59	0.04688234		2076.58	0.05611774		2606.58	0.00852656		3136.57	0.03781888		3666.57	0.01457974		4196.57	0.08009209
486.8	-0.00256526		1016.79	-0.00283818		1546.79	0.04835878		2076.78	0.056073		2606.78	0.00868753		3136.77	0.03763282		3666.77	0.01505229		4196.77	0.08073698
487	-0.00251226		1016.99	-0.00278695		1546.99	0.04913818		2076.98	0.05616798		2606.98	0.00931582		3136.97	0.03717216		3666.97	0.01449594		4196.97	0.08037575
487.2	-0.00276138		1017.19	-0.00278214		1547.19	0.05004951		2077.18	0.05638411		2607.18	0.00958707		3137.17	0.03790723		3667.17	0.01485711		4197.17	0.08170188
487.4	-0.00338657		1017.39	-0.0029973		1547.39	0.05090106		2077.38	0.05605091		2607.38	0.01002073		3137.37	0.03767012		3667.37	0.01475011		4197.37	0.08224327
487.6	-0.00299872		1017.59	-0.0037664		1547.59	0.05080465		2077.58	0.05718926		2607.58	0.00951747		3137.57	0.0372276		3667.57	0.01420742		4197.57	0.08246419
487.8	-0.00388451		1017.79	-0.00400349		1547.79	0.05029589		2077.78	0.05637544		2607.78	0.00963471		3137.77	0.03727714		3667.77	0.01330291		4197.77	0.08293992
488	-0.00272676		1017.99	-0.00436824		1547.99	0.05095962		2077.98	0.0556914		2607.98	0.00927058		3137.97	0.03720776		3667.97	0.0131727		4197.97	0.08356626
488.2	-0.00343034		1018.19	-0.00477335		1548.19	0.05162603		2078.18	0.05585067		2608.18	0.00871614		3138.17	0.03728936		3668.17	0.01293902		4198.17	0.08331765
488.4	-0.00327512		1018.39	-0.00466142		1548.39	0.0508973		2078.38	0.05557477		2608.38	0.00919816		3138.37	0.03783208		3668.37	0.01264649		4198.37	0.08388894
488.6	-0.00337726		1018.59	-0.00482146		1548.59	0.05054931		2078.58	0.05522138		2608.58	0.00856243		3138.57	0.03754815		3668.57	0.01321043		4198.57	0.08540465
488.8	-0.00340907		1018.79	-0.00521584		1548.79	0.05019204		2078.78	0.05488453		2608.78	0.00765798		3138.77	0.03705789		3668.77	0.01264995		4198.77	0.08543687
489	-0.00363968		1018.99	-0.00449595		1548.99	0.05062989		2078.98	0.05424192		2608.98	0.00793176		3138.97	0.03713491		3668.97	0.01212051		4198.97	0.08512932
489.2	-0.00358117		1019.19	-0.00437472		1549.19	0.05010345		2079.18	0.05360459		2609.18	0.00748		3139.17	0.03729056		3669.17	0.01216154		4199.17	0.08479533
489.4	-0.00369714		1019.39	-0.00418826		1549.39	0.04921023		2079.38	0.05325725		2609.38	0.00742736		3139.37	0.03760305		3669.37	0.01263961		4199.37	0.08528651
489.6	-0.00357053		1019.59	-0.00305856		1549.59	0.04887734		2079.58	0.0530427		2609.58	0.00825757		3139.57	0.03653095		3669.57	0.01310821		4199.57	0.08541852
489.8	-0.00386792		1019.79	-0.00262861		1549.79	0.04778528		2079.78	0.05232776		2609.78	0.0080689		3139.77	0.03695599		3669.77	0.01351239		4199.77	0.08474242
490	-0.00336993		1019.99	-0.00256347		1549.99	0.04746165		2079.98	0.05132936		2609.98	0.00885835		3139.97	0.03752331		3669.97	0.01345822		4199.97	0.0838167
490.2	-0.00319156		1020.19	-0.00264692		1550.19	0.04717513		2080.18	0.05141021		2610.18	0.00922619		3140.17	0.03716788		3670.17	0.01325862		4200.17	0.08261186
490.4	-0.00252591		1020.39	-0.00241334		1550.39	0.04733681		2080.38	0.05230703		2610.38	0.00903982		3140.37	0.03629964		3670.37	0.01355685		4200.37	0.08262391
490.6	-0.0023763		1020.59	-0.00194438		1550.59	0.04736815		2080.58	0.05211467		2610.58	0.00979602		3140.57	0.03591137		3670.57	0.01358414		4200.57	0.08258979
490.8	-0.0026826		1020.79	-0.00180039		1550.79	0.04747677		2080.78	0.05163292		2610.78	0.00991466		3140.77	0.03603224		3670.77	0.01362045		4200.77	0.08323145
491	-0.0021425		1020.99	-0.00191021		1550.99	0.04758121		2080.98	0.05198555		2610.98	0.00957946		3140.97	0.03644021		3670.97	0.01321298		4200.97	0.08302528
491.2	-0.00191426		1021.19	-0.00196424		1551.19	0.04737941		2081.18	0.05198117		2611.18	0.00949377		3141.17	0.03737276		3671.17	0.01338499		4201.17	0.08294426
491.4	-0.00235549		1021.39	-0.00251981		1551.39	0.04653872		2081.38	0.05287579		2611.38	0.00853097		3141.37	0.03767823		3671.37	0.01355282		4201.37	0.08254128
491.6	-0.00239279		1021.59	-0.00206969		1551.59	0.04635307		2081.58	0.0536915		2611.58	0.00770258		3141.57	0.03789755		3671.57	0.01312703		4201.57	0.0827852
491.8	-0.00355419		1021.79	-0.00206081		1551.79	0.0463059		2081.78	0.05275741		2611.78	0.00746821		3141.77	0.03765305		3671.77	0.01320913		4201.77	0.0827255
492	-0.00289951		1021.99	-0.00205026		1551.99	0.0475463		2081.98	0.05246762		2611.98	0.00691968		3141.97	0.03804562		3671.97	0.01305638		4201.97	0.08323479
492.2	-0.0042637		1022.19	-0.00200552		1552.19	0.04754794		2082.18	0.0529408		2612.18	0.00696667		3142.17	0.03774169		3672.17	0.01340679		4202.17	0.08344484
492.4	-0.00493677		1022.39	-0.00298534		1552.39	0.04731428		2082.38	0.05303364		2612.38	0.00731208		3142.37	0.0376434		3672.37	0.01323242		4202.37	0.08407186
492.6	-0.00521127		1022.59	-0.00344361		1552.59	0.04748003		2082.58	0.05295396		2612.58	0.00674352		3142.57	0.03728507		3672.57	0.01257737		4202.57	0.08444306
492.8	-0.00545218		1022.79	-0.00310735		1552.79	0.04722847		2082.78	0.05272648		2612.78	0.00664864		3142.77	0.03668268		3672.77	0.01126973		4202.77	0.08349915
493	-0.00612503		1022.99	-0.0030908		1552.99	0.04798684		2082.98	0.05322764		2612.98	0.00616114		3142.97	0.03713196		3672.97	0.01106921		4202.97	0.0829766
493.2	-0.00561442		1023.19	-0.00288827		1553.19	0.04775468		2083.18	0.05381788		2613.18	0.00620954		3143.17	0.0368214		3673.17	0.01128124		4203.17	0.08261537
493.4	-0.00514464		1023.39	-0.00256621		1553.39	0.04822053		2083.38	0.05382586		2613.38	0.00731661		3143.37	0.03629975		3673.37	0.01201292		4203.37	0.08236123
493.6	-0.00475947		1023.59	-0.00177427		1553.59	0.04836037		2083.58	0.05394108		2613.58	0.00800444		3143.57	0.03613395		3673.57	0.01294571		4203.57	0.08187387
493.8	-0.00367758		1023.79	-0.00156963		1553.79	0.04835297		2083.78	0.05421804		2613.78	0.00764181		3143.77	0.03659368		3673.77	0.01282226		4203.77	0.08182579
494	-0.00365914		1023.99	-0.0021874		1553.99	0.04851886		2083.98	0.05384827		2613.98	0.00852531		3143.97	0.03648663		3673.97	0.0129653		4203.97	0.08165219
494.2	-0.00340013		1024.19	-0.0018567		1554.19	0.04866417		2084.18	0.05435832		2614.18	0.00831569		3144.17	0.03590707		3674.17	0.0130964		4204.17	0.08204127
494.4	-0.0030321		1024.39	-0.00178217		1554.39	0.04972144		2084.38	0.05431988		2614.38	0.00795505		3144.37	0.03558772		3674.37	0.01388274		4204.37	0.08275688
494.6	-0.0031197		1024.59	-0.00262206		1554.59	0.04911386		2084.58	0.05412405		2614.58	0.00798287		3144.57	0.03578975		3674.57	0.01379498		4204.57	0.08356206
494.8	-0.00275691		1024.79	-0.00285288		1554.79	0.04973977		2084.78	0.05482863		2614.78	0.00737158		3144.77	0.03599934		3674.77	0.01252658		4204.77	0.08374815
495	-0.0021585		1024.99	-0.00373847		1554.99	0.04966436		2084.98	0.05518936		2614.98	0.00686062		3144.97	0.03656323		3674.97	0.01303941		4204.97	0.08323923
495.2	-0.00120942		1025.19	-0.00360099		1555.19	0.04936841		2085.18	0.05545859		2615.18	0.00615194		3145.17	0.03686169		3675.17	0.01305453		4205.17	0.08397835
495.4	-0.00100319		1025.39	-0.00357324		1555.39	0.04842146		2085.38	0.05611602		2615.38	0.00564731		3145.37	0.03716835		3675.37	0.01244971		4205.37	0.0845539
495.6	-0.00142158		1025.59	-0.00380052		1555.59	0.04902283		2085.58	0.05510773		2615.58	0.00566745		3145.57	0.03692511		3675.57	0.01273662		4205.57	0.08512429
495.8	-0.00158094		1025.79	-0.00367301		1555.79	0.04974051		2085.78	0.05445134		2615.78	0.00517199		3145.77	0.03636848		3675.77	0.01257679		4205.77	0.08506568
496	-0.0020053		1025.99	-0.00404517		1555.99	0.05026313		2085.98	0.05367875		2615.98	0.00539666		3145.97	0.03680865		3675.97	0.01174355		4205.97	0.08482162
496.2	-0.002836		1026.19	-0.00500008		1556.19	0.04983951		2086.18	0.05366271		2616.18	0.00610422		3146.17	0.03684528		3676.17	0.01177743		4206.17	0.08496079
496.4	-0.00336389		1026.39	-0.00531083		1556.39	0.04995598		2086.38	0.05298508		2616.38	0.00613		3146.37	0.03679819		3676.37	0.0114321		4206.37	0.08466167
496.6	-0.00362325		1026.59	-0.00547457		1556.59	0.04978132		2086.58	0.05236153		2616.58	0.00560438		3146.57	0.03667179		3676.57	0.01126379		4206.57	0.08475152
496.8	-0.00387948		1026.79	-0.00510885		1556.79	0.0492804		2086.78	0.05199662		2616.78	0.0054617		3146.77	0.03677075		3676.77	0.01136627		4206.77	0.08445896
497	-0.00376998		1026.99	-0.004452		1556.99	0.04944039		2086.98	0.05271728		2616.98	0.00509852		3146.97	0.03728887		3676.97	0.01241848		4206.97	0.08412062
497.2	-0.00361154		1027.19	-0.00427388		1557.19	0.04909385		2087.18	0.05286001		2617.18	0.00546288		3147.17	0.03698484		3677.17	0.01267434		4207.17	0.08421794
497.4	-0.00400497		1027.39	-0.00377975		1557.39	0.04892749		2087.38	0.05296393		2617.38	0.00520177		3147.37	0.03695309		3677.37	0.01312926		4207.37	0.08443645
497.6	-0.00486334		1027.59	-0.00372719		1557.59	0.04841916		2087.58	0.0528294		2617.58	0.00448929		3147.57	0.03730348		3677.57	0.01244475		4207.57	0.08416681
497.8	-0.0050903		1027.79	-0.00345416		1557.79	0.04852844		2087.78	0.05297752		2617.78	0.00446266		3147.77	0.0374189		3677.77	0.01287228		4207.77	0.0844148
498	-0.00626756		1027.99	-0.0032877		1557.99	0.04890758		2087.98	0.05308238		2617.98	0.00508837		3147.97	0.03726798		3677.97	0.01300907		4207.97	0.08479855
498.2	-0.00623599		1028.19	-0.00288537		1558.19	0.04941172		2088.18	0.05334949		2618.18	0.00547626		3148.17	0.03757986		3678.17	0.01283719		4208.17	0.08495901
498.4	-0.0060972		1028.39	-0.00277105		1558.39	0.04940555		2088.38	0.05340332		2618.38	0.00571187		3148.37	0.03761527		3678.37	0.01377333		4208.37	0.08554225
498.6	-0.00592749		1028.59	-0.00349968		1558.59	0.04871785		2088.58	0.05411532		2618.58	0.00620299		3148.57	0.0367585		3678.57	0.01278019		4208.57	0.08505186
498.8	-0.00557904		1028.79	-0.00353182		1558.79	0.04966343		2088.78	0.05422579		2618.78	0.00659567		3148.77	0.03628132		3678.77	0.01283217		4208.77	0.08483245
499	-0.00573108		1028.99	-0.00317945		1558.99	0.04901847		2088.98	0.05434081		2618.98	0.00743449		3148.97	0.0361255		3678.97	0.01358603		4208.97	0.08468916
499.2	-0.00431508		1029.19	-0.00238558		1559.19	0.04944366		2089.18	0.05472568		2619.18	0.00795856		3149.17	0.03607903		3679.17	0.01320229		4209.17	0.08443016
499.4	-0.00465341		1029.39	-0.00251714		1559.39	0.04960282		2089.38	0.05487623		2619.38	0.00808023		3149.37	0.03617008		3679.37	0.01331445		4209.37	0.08400668
499.6	-0.00451289		1029.59	-0.0023717		1559.59	0.0511463		2089.58	0.0544153		2619.58	0.00737046		3149.57	0.03592513		3679.57	0.01411516		4209.57	0.08383326
499.8	-0.00464427		1029.79	-0.00229595		1559.79	0.05157505		2089.78	0.05411527		2619.78	0.00788872		3149.77	0.03525443		3679.77	0.01328916		4209.77	0.08345051
500	-0.00456628		1029.99	-0.00325658		1559.99	0.05123534		2089.98	0.05418913		2619.98	0.00768901		3149.97	0.03495619		3679.97	0.01408238		4209.97	0.08311585
500.2	-0.00400239		1030.19	-0.00381651		1560.19	0.05163341		2090.18	0.0547639		2620.18	0.00707836		3150.17	0.03362021		3680.17	0.01503519		4210.17	0.08405214
500.4	-0.00366917		1030.39	-0.00328481		1560.39	0.05168958		2090.38	0.05392256		2620.38	0.00682089		3150.37	0.03297377		3680.37	0.0149175		4210.37	0.08358426
500.6	-0.00313973		1030.59	-0.00419568		1560.59	0.05178145		2090.58	0.05391731		2620.58	0.00669691		3150.57	0.0328708		3680.57	0.0145075		4210.57	0.08367569
500.8	-0.00241477		1030.79	-0.00362171		1560.79	0.05157398		2090.78	0.0532058		2620.78	0.00728553		3150.77	0.03305074		3680.77	0.01404789		4210.77	0.08328567
501	-0.00204941		1030.99	-0.00428067		1560.99	0.05178225		2090.98	0.05352066		2620.98	0.00677086		3150.97	0.03322264		3680.97	0.0139791		4210.97	0.08342726
501.2	-0.00165891		1031.19	-0.00514272		1561.19	0.05229722		2091.18	0.05250041		2621.18	0.00617152		3151.17	0.03326003		3681.17	0.01321388		4211.17	0.08323688
501.4	-0.00165346		1031.39	-0.00510277		1561.39	0.05302844		2091.38	0.05151792		2621.38	0.00597327		3151.37	0.03359878		3681.37	0.01284364		4211.37	0.08312952
501.6	-0.00194952		1031.59	-0.00488658		1561.59	0.05341611		2091.58	0.04995743		2621.58	0.00541787		3151.57	0.0341228		3681.57	0.01213714		4211.57	0.08294411
501.8	-0.00250836		1031.79	-0.00430557		1561.79	0.05412928		2091.78	0.04981185		2621.78	0.00542388		3151.77	0.03457906		3681.77	0.01251189		4211.77	0.08330773
502	-0.00243173		1031.99	-0.0047783		1561.99	0.05378952		2091.98	0.04958849		2621.98	0.00596022		3151.97	0.03463592		3681.97	0.01164506		4211.97	0.08371795
502.2	-0.00218349		1032.19	-0.00442303		1562.19	0.053886		2092.18	0.04853487		2622.18	0.00651334		3152.17	0.03549328		3682.17	0.01140636		4212.17	0.08412186
502.4	-0.00239576		1032.39	-0.00454981		1562.39	0.05377331		2092.38	0.04853551		2622.38	0.00619077		3152.37	0.03544417		3682.37	0.01093211		4212.37	0.08381022
502.6	-0.00271578		1032.59	-0.0042693		1562.59	0.05405247		2092.58	0.04925651		2622.58	0.00689224		3152.57	0.0357212		3682.57	0.01034972		4212.57	0.08293084
502.8	-0.00312855		1032.79	-0.00429935		1562.79	0.05446474		2092.78	0.04921258		2622.78	0.00713877		3152.77	0.03681493		3682.77	0.01053388		4212.77	0.08346777
503	-0.00325873		1032.99	-0.00345684		1562.99	0.05395303		2092.98	0.05070462		2622.98	0.00711279		3152.97	0.03781977		3682.97	0.01028626		4212.97	0.08288487
503.2	-0.00388095		1033.19	-0.00298829		1563.19	0.0538559		2093.18	0.05177668		2623.18	0.0067162		3153.17	0.03858222		3683.17	0.01056214		4213.17	0.08343616
503.4	-0.00494665		1033.39	-0.00376869		1563.39	0.05355384		2093.38	0.05214023		2623.38	0.00694971		3153.37	0.03844719		3683.37	0.01033925		4213.37	0.08384
503.6	-0.00518844		1033.59	-0.00373884		1563.59	0.05301929		2093.58	0.05265765		2623.58	0.00782498		3153.57	0.03917104		3683.57	0.01005441		4213.57	0.08370809
503.8	-0.00547266		1033.79	-0.00426735		1563.79	0.05171359		2093.78	0.0533024		2623.78	0.00813752		3153.77	0.03845366		3683.77	0.01036367		4213.77	0.08337299
504	-0.00564047		1033.99	-0.0038817		1563.99	0.05051204		2093.98	0.05416125		2623.98	0.00693588		3153.97	0.03724404		3683.97	0.01001651		4213.97	0.08275414
504.2	-0.00601371		1034.19	-0.00358347		1564.19	0.05048937		2094.18	0.0548631		2624.18	0.00699094		3154.17	0.03703342		3684.17	0.00918257		4214.17	0.0828472
504.4	-0.00677545		1034.39	-0.00389176		1564.39	0.04952925		2094.38	0.05520167		2624.38	0.0071718		3154.37	0.03742458		3684.37	0.00870304		4214.37	0.08281435
504.6	-0.00609989		1034.59	-0.00458843		1564.59	0.04880028		2094.58	0.05580399		2624.58	0.00666064		3154.57	0.0368066		3684.57	0.00814843		4214.57	0.08279532
504.8	-0.00676479		1034.79	-0.00432598		1564.79	0.04837608		2094.78	0.05627693		2624.78	0.00675993		3154.77	0.03607237		3684.77	0.00870794		4214.77	0.08286092
505	-0.0068055		1034.99	-0.00509206		1564.99	0.04871709		2094.98	0.05585073		2624.98	0.00572674		3154.97	0.03592476		3684.97	0.00891987		4214.97	0.08267173
505.2	-0.00641928		1035.19	-0.00448643		1565.19	0.04902131		2095.18	0.05378047		2625.18	0.00578549		3155.17	0.03526008		3685.17	0.00924079		4215.17	0.08205694
505.4	-0.00698521		1035.39	-0.00410306		1565.39	0.04910681		2095.38	0.05279698		2625.38	0.00533475		3155.37	0.03446002		3685.37	0.01001426		4215.37	0.08241327
505.6	-0.00778409		1035.59	-0.00380101		1565.59	0.04836677		2095.58	0.05161251		2625.58	0.0041724		3155.57	0.03363594		3685.57	0.01123377		4215.57	0.08273412
505.8	-0.00811492		1035.79	-0.00368136		1565.79	0.04789636		2095.78	0.05133045		2625.78	0.00394954		3155.77	0.03326504		3685.77	0.01171598		4215.77	0.08386632
506	-0.00719187		1035.99	-0.00401727		1565.99	0.04772152		2095.98	0.05103682		2625.98	0.0038227		3155.97	0.03282512		3685.97	0.01175138		4215.97	0.08332405
506.2	-0.00688745		1036.19	-0.00375754		1566.19	0.0486608		2096.18	0.05137943		2626.18	0.00429204		3156.17	0.03285662		3686.17	0.01168925		4216.17	0.08332895
506.4	-0.00654523		1036.39	-0.00509379		1566.39	0.04911048		2096.38	0.05227641		2626.38	0.00443172		3156.37	0.03308193		3686.37	0.01165262		4216.37	0.08256546
506.6	-0.00577123		1036.59	-0.00508707		1566.59	0.04926824		2096.58	0.05283084		2626.58	0.00499964		3156.57	0.03299677		3686.57	0.01271332		4216.57	0.08273146
506.8	-0.00519542		1036.79	-0.0053512		1566.79	0.04984749		2096.78	0.05298582		2626.78	0.00431975		3156.77	0.03304315		3686.77	0.01293069		4216.77	0.08355958
507	-0.00450634		1036.99	-0.00539647		1566.99	0.04913439		2096.98	0.05358435		2626.98	0.00459537		3156.97	0.03379094		3686.97	0.01244749		4216.97	0.08357554
507.2	-0.00491374		1037.19	-0.0056554		1567.19	0.0487447		2097.18	0.05337679		2627.18	0.00483388		3157.17	0.03382786		3687.17	0.01322141		4217.17	0.08415927
507.4	-0.00366189		1037.39	-0.00663875		1567.39	0.04868411		2097.38	0.05311714		2627.38	0.0050179		3157.37	0.03390551		3687.37	0.01299802		4217.37	0.08337046
507.6	-0.00339869		1037.59	-0.00679142		1567.59	0.0482057		2097.58	0.05373832		2627.58	0.00558712		3157.57	0.03389795		3687.57	0.01287042		4217.57	0.08346213
507.8	-0.00304742		1037.79	-0.00714425		1567.79	0.04840336		2097.78	0.05409873		2627.78	0.00485946		3157.77	0.03314267		3687.77	0.01243626		4217.77	0.08396416
508	-0.00344396		1037.99	-0.0062875		1567.99	0.04783316		2097.98	0.05512912		2627.98	0.00434785		3157.97	0.0333415		3687.97	0.01117532		4217.97	0.08358104
508.2	-0.00379774		1038.19	-0.00578983		1568.19	0.04834484		2098.18	0.05573394		2628.18	0.00499784		3158.17	0.03499238		3688.17	0.01129209		4218.17	0.08379642
508.4	-0.00374261		1038.39	-0.00567336		1568.39	0.04790487		2098.38	0.05588857		2628.38	0.00444748		3158.37	0.03493265		3688.37	0.01134141		4218.37	0.08408209
508.6	-0.00347529		1038.59	-0.00501922		1568.59	0.04832067		2098.58	0.05529785		2628.58	0.00344246		3158.57	0.03498452		3688.57	0.01165873		4218.57	0.08321525
508.8	-0.00465487		1038.79	-0.00471218		1568.79	0.04928177		2098.78	0.05492302		2628.78	0.00404294		3158.77	0.03504749		3688.77	0.01276571		4218.77	0.08320342
509	-0.00414348		1038.99	-0.00430547		1568.99	0.04881031		2098.98	0.05354419		2628.98	0.0040021		3158.97	0.03522789		3688.97	0.01228752		4218.97	0.08238339
509.2	-0.00460626		1039.19	-0.00332233		1569.19	0.048231		2099.18	0.05201159		2629.18	0.00410021		3159.17	0.03516956		3689.17	0.01231137		4219.17	0.08224325
509.4	-0.00541151		1039.39	-0.00248221		1569.39	0.04706292		2099.38	0.0517343		2629.38	0.00390187		3159.37	0.03528048		3689.37	0.01265271		4219.37	0.08250703
509.6	-0.00688934		1039.59	-0.00146642		1569.59	0.04663882		2099.58	0.05213787		2629.58	0.00324673		3159.57	0.03512316		3689.57	0.01295958		4219.57	0.08197703
509.8	-0.00659013		1039.79	-0.00037911		1569.79	0.04621926		2099.78	0.05173997		2629.78	0.00377636		3159.77	0.03534996		3689.77	0.01207008		4219.77	0.08128322
510	-0.00694616		1039.99	-0.00064532		1569.99	0.04651286		2099.98	0.05257019		2629.98	0.00442805		3159.97	0.03634876		3689.97	0.01158885		4219.97	0.08034698
510.2	-0.00716571		1040.19	-0.00138814		1570.19	0.04726734		2100.18	0.05341027		2630.18	0.00564598		3160.17	0.03629378		3690.17	0.01182119		4220.17	0.07989104
510.4	-0.00733304		1040.39	-0.00148873		1570.39	0.04754557		2100.38	0.05419754		2630.38	0.00594555		3160.37	0.0367131		3690.37	0.01201675		4220.37	0.08007551
510.6	-0.00695632		1040.59	-0.00156702		1570.59	0.04748769		2100.58	0.05465172		2630.58	0.00554737		3160.57	0.03663619		3690.57	0.01235399		4220.57	0.08087589
510.8	-0.0070989		1040.79	-0.00150797		1570.79	0.0479551		2100.78	0.05521171		2630.78	0.0057939		3160.77	0.03666043		3690.77	0.0126156		4220.77	0.0808725
511	-0.00663091		1040.99	-0.00227356		1570.99	0.04769395		2100.98	0.05534855		2630.98	0.00636343		3160.97	0.0367592		3690.97	0.01260226		4220.97	0.08109617
511.2	-0.00695758		1041.19	-0.00266982		1571.19	0.04802802		2101.18	0.05590146		2631.18	0.00673829		3161.17	0.03624684		3691.17	0.01300915		4221.17	0.08088809
511.4	-0.00677943		1041.39	-0.00381549		1571.39	0.04907682		2101.38	0.05637498		2631.38	0.00679434		3161.37	0.03596614		3691.37	0.0126184		4221.37	0.08145316
511.6	-0.0072923		1041.59	-0.00449449		1571.59	0.04939429		2101.58	0.05637098		2631.58	0.00727209		3161.57	0.03546809		3691.57	0.01232886		4221.57	0.08203634
511.8	-0.00698711		1041.79	-0.00509234		1571.79	0.04985949		2101.78	0.05654179		2631.78	0.0064877		3161.77	0.03597977		3691.77	0.01123298		4221.77	0.08270528
512	-0.00651938		1041.99	-0.00438169		1571.99	0.05036113		2101.98	0.05569849		2631.98	0.0061985		3161.97	0.03618023		3691.97	0.01141907		4221.97	0.0822763
512.2	-0.00658497		1042.19	-0.00498683		1572.19	0.05048024		2102.18	0.05461637		2632.18	0.00611788		3162.17	0.03622553		3692.17	0.0111703		4222.17	0.08264705
512.4	-0.00655364		1042.39	-0.00563672		1572.39	0.05049667		2102.38	0.05372435		2632.38	0.00586228		3162.37	0.03540056		3692.37	0.01066971		4222.37	0.08310969
512.6	-0.00626524		1042.59	-0.00621778		1572.59	0.0509761		2102.58	0.05303381		2632.58	0.00547493		3162.57	0.03490822		3692.57	0.01066352		4222.57	0.08286077
512.8	-0.00634762		1042.79	-0.00684353		1572.79	0.04988614		2102.78	0.05245259		2632.78	0.00617094		3162.77	0.0339986		3692.77	0.00948544		4222.77	0.08343219
513	-0.00547175		1042.99	-0.00641803		1572.99	0.04874124		2102.98	0.05220559		2632.98	0.00567858		3162.97	0.0346942		3692.97	0.00840778		4222.97	0.08266384
513.2	-0.00559869		1043.19	-0.00520863		1573.19	0.04854483		2103.18	0.05134023		2633.18	0.00513341		3163.17	0.03444574		3693.17	0.00812843		4223.17	0.08249096
513.4	-0.00597995		1043.39	-0.00468955		1573.39	0.04752224		2103.38	0.05132635		2633.38	0.00456269		3163.37	0.03435957		3693.37	0.00748366		4223.37	0.08186292
513.6	-0.00531789		1043.59	-0.00406999		1573.59	0.04742623		2103.58	0.0511041		2633.58	0.003896		3163.57	0.03443113		3693.57	0.00740904		4223.57	0.08168901
513.8	-0.00468579		1043.79	-0.00435435		1573.79	0.04715501		2103.78	0.05125065		2633.78	0.00383434		3163.77	0.03506424		3693.77	0.00676997		4223.77	0.08165784
514	-0.00520804		1043.99	-0.00444553		1573.99	0.04750503		2103.98	0.05173927		2633.98	0.00342539		3163.97	0.03589954		3693.97	0.00711572		4223.97	0.08157464
514.2	-0.00402681		1044.19	-0.00380959		1574.19	0.04811581		2104.18	0.05271063		2634.18	0.00373694		3164.17	0.03536869		3694.17	0.00798352		4224.17	0.08162538
514.4	-0.00432818		1044.39	-0.00346025		1574.39	0.04805299		2104.38	0.05338874		2634.38	0.00334597		3164.37	0.03572576		3694.37	0.0079268		4224.37	0.08230706
514.6	-0.00372981		1044.59	-0.00390368		1574.59	0.0476423		2104.58	0.05367684		2634.58	0.00282438		3164.57	0.03574092		3694.57	0.00822962		4224.57	0.08202561
514.8	-0.00372739		1044.79	-0.00364986		1574.79	0.04757987		2104.78	0.05419386		2634.78	0.00281236		3164.77	0.03564658		3694.77	0.00888174		4224.77	0.08157627
515	-0.0034891		1044.99	-0.00346605		1574.99	0.04701387		2104.98	0.05413839		2634.98	0.0029192		3164.97	0.0362791		3694.97	0.00863505		4224.97	0.08175787
515.2	-0.00379657		1045.19	-0.00374205		1575.19	0.04668862		2105.18	0.05425671		2635.18	0.00251399		3165.17	0.03666901		3695.17	0.00935062		4225.17	0.08106664
515.4	-0.00435975		1045.39	-0.00354185		1575.39	0.04728728		2105.38	0.05384488		2635.38	0.00173069		3165.37	0.03643278		3695.37	0.01046446		4225.37	0.08212196
515.6	-0.00510934		1045.59	-0.00351061		1575.59	0.04727329		2105.58	0.05344726		2635.58	0.00110137		3165.57	0.03633839		3695.57	0.01141409		4225.57	0.08271649
515.8	-0.0051414		1045.79	-0.00393886		1575.79	0.04771712		2105.78	0.05359803		2635.78	0.00117545		3165.77	0.0362478		3695.77	0.01151547		4225.77	0.0828161
516	-0.00495647		1045.99	-0.0045023		1575.99	0.04778248		2105.98	0.05339053		2635.98	0.00241617		3165.97	0.03525894		3695.97	0.01207951		4225.97	0.08243305
516.2	-0.00698605		1046.19	-0.00466513		1576.19	0.04753334		2106.18	0.05403467		2636.18	0.00302234		3166.17	0.03461614		3696.17	0.01215088		4226.17	0.0823043
516.4	-0.00759934		1046.39	-0.00484592		1576.39	0.04784917		2106.38	0.0542223		2636.38	0.00458012		3166.37	0.03415815		3696.37	0.01283172		4226.37	0.08147837
516.6	-0.00821726		1046.59	-0.00452073		1576.59	0.04822581		2106.58	0.0546213		2636.58	0.00571693		3166.57	0.033353		3696.57	0.01356371		4226.57	0.08091855
516.8	-0.00919277		1046.79	-0.00489236		1576.79	0.04842226		2106.78	0.05482846		2636.78	0.00641248		3166.77	0.03268853		3696.77	0.01412748		4226.77	0.08054671
517	-0.00933764		1046.99	-0.00427869		1576.99	0.04953631		2106.98	0.05495479		2636.98	0.00678146		3166.97	0.03312417		3696.97	0.01525552		4226.97	0.07946817
517.2	-0.00908355		1047.19	-0.00351615		1577.19	0.04987638		2107.18	0.05456649		2637.18	0.00754699		3167.17	0.03276788		3697.17	0.01595243		4227.17	0.07935674
517.4	-0.00891068		1047.39	-0.00422816		1577.39	0.05007378		2107.38	0.05431875		2637.38	0.00811815		3167.37	0.0323727		3697.37	0.01614361		4227.37	0.07926394
517.6	-0.0075466		1047.59	-0.00428121		1577.59	0.05074199		2107.58	0.05487113		2637.58	0.00810856		3167.57	0.03320573		3697.57	0.01584587		4227.57	0.07862968
517.8	-0.00757676		1047.79	-0.00449609		1577.79	0.05130837		2107.78	0.05538425		2637.78	0.00868214		3167.77	0.03387663		3697.77	0.01498829		4227.77	0.07818079
518	-0.00786345		1047.99	-0.00409511		1577.99	0.05103971		2107.98	0.05494129		2637.98	0.00908837		3167.97	0.03458235		3697.97	0.01454875		4227.97	0.0783423
518.2	-0.00720932		1048.19	-0.00372045		1578.19	0.05090333		2108.18	0.05516313		2638.18	0.01034652		3168.17	0.03534978		3698.17	0.01352435		4228.17	0.07877673
518.4	-0.00755276		1048.39	-0.00426166		1578.39	0.04974806		2108.38	0.05441705		2638.38	0.00994214		3168.37	0.03543319		3698.37	0.01245025		4228.37	0.07940744
518.6	-0.00622309		1048.59	-0.00443009		1578.59	0.04880182		2108.58	0.05442651		2638.58	0.01010201		3168.57	0.03555993		3698.57	0.01191551		4228.57	0.07922817
518.8	-0.00579783		1048.79	-0.00510232		1578.79	0.04849431		2108.78	0.05381583		2638.78	0.00908659		3168.77	0.03532184		3698.77	0.0102166		4228.77	0.07932422
519	-0.00538621		1048.99	-0.0049087		1578.99	0.04838775		2108.98	0.05363186		2638.98	0.00844195		3168.97	0.03573301		3698.97	0.0095539		4228.97	0.08048916
519.2	-0.0051145		1049.19	-0.00421771		1579.19	0.04874958		2109.18	0.05360344		2639.18	0.00681858		3169.17	0.03561967		3699.17	0.00928478		4229.17	0.08132389
519.4	-0.00476224		1049.39	-0.0038908		1579.39	0.04961999		2109.38	0.05362759		2639.38	0.0056982		3169.37	0.03556522		3699.37	0.00811784		4229.37	0.08231843
519.6	-0.0050627		1049.59	-0.00392935		1579.59	0.04910853		2109.58	0.05381575		2639.58	0.00471501		3169.57	0.0356602		3699.57	0.00796091		4229.57	0.08307549
519.8	-0.0045622		1049.79	-0.00405498		1579.79	0.04940553		2109.78	0.05428813		2639.78	0.00394449		3169.77	0.03495681		3699.77	0.00709166		4229.77	0.08275116
520	-0.00446946		1049.99	-0.00378061		1579.99	0.04899098		2109.98	0.05484449		2639.98	0.00390033		3169.97	0.03472312		3699.97	0.00626368		4229.97	0.08279395
520.2	-0.00501359		1050.19	-0.00293273		1580.19	0.04952443		2110.18	0.05475313		2640.18	0.00297502		3170.17	0.03429901		3700.17	0.00614628		4230.17	0.08278853
520.4	-0.0040366		1050.39	-0.00291977		1580.39	0.04991314		2110.38	0.05486617		2640.38	0.00285427		3170.37	0.0340402		3700.37	0.00684219		4230.37	0.082201
520.6	-0.00410508		1050.59	-0.00208989		1580.59	0.05092684		2110.58	0.05502819		2640.58	0.00216327		3170.57	0.03299601		3700.57	0.00744999		4230.57	0.08211399
520.8	-0.00391177		1050.79	-0.00242654		1580.79	0.0507461		2110.78	0.05538964		2640.78	0.00143878		3170.77	0.03309982		3700.77	0.00839869		4230.77	0.08235159
521	-0.00377433		1050.99	-0.00166076		1580.99	0.05056285		2110.98	0.05499622		2640.98	0.00153381		3170.97	0.03358732		3700.97	0.00925724		4230.97	0.08146026
521.2	-0.00404727		1051.19	-0.00139663		1581.19	0.05024535		2111.18	0.05519092		2641.18	0.00136833		3171.17	0.0337828		3701.17	0.00985941		4231.17	0.08144725
521.4	-0.00443466		1051.39	-0.00247569		1581.39	0.05035672		2111.38	0.05546337		2641.38	0.0005969		3171.37	0.03370609		3701.37	0.00949987		4231.37	0.08100972
521.6	-0.00468732		1051.59	-0.00252346		1581.59	0.05044878		2111.58	0.05560216		2641.58	0.00036365		3171.57	0.0354188		3701.57	0.00866257		4231.57	0.08029177
521.8	-0.00613754		1051.79	-0.0024014		1581.79	0.04982671		2111.78	0.05509352		2641.78	0.00128689		3171.77	0.03565323		3701.77	0.00813402		4231.77	0.08109254
522	-0.00695696		1051.99	-0.00279375		1581.99	0.04958663		2111.98	0.05528879		2641.98	0.00161827		3171.97	0.03579076		3701.97	0.00896973		4231.97	0.08128418
522.2	-0.00761612		1052.19	-0.00270902		1582.19	0.04907443		2112.18	0.05461664		2642.18	0.00282977		3172.17	0.03558823		3702.17	0.00963167		4232.17	0.08129187
522.4	-0.007827		1052.39	-0.00393357		1582.39	0.04857331		2112.38	0.05450656		2642.38	0.00220385		3172.37	0.03515007		3702.37	0.01002497		4232.37	0.08188413
522.6	-0.00786399		1052.59	-0.00501122		1582.59	0.0481403		2112.58	0.05451984		2642.58	0.00292206		3172.57	0.03474757		3702.57	0.00970199		4232.57	0.08137478
522.8	-0.00860218		1052.79	-0.00613947		1582.79	0.04790212		2112.78	0.05398548		2642.78	0.00243253		3172.77	0.03450613		3702.77	0.00970609		4232.77	0.08139392
523	-0.00935261		1052.99	-0.00602445		1582.99	0.04715464		2112.98	0.05428786		2642.98	0.00322766		3172.97	0.03440984		3702.97	0.01096047		4232.97	0.08183035
523.2	-0.00940465		1053.19	-0.00593603		1583.19	0.0474136		2113.18	0.05447319		2643.18	0.00288735		3173.17	0.03439908		3703.17	0.0107595		4233.17	0.08197754
523.4	-0.00947721		1053.39	-0.00650969		1583.39	0.04687397		2113.38	0.05503637		2643.38	0.00249529		3173.37	0.03480529		3703.37	0.01102454		4233.37	0.08179515
523.6	-0.00913428		1053.59	-0.00647531		1583.59	0.0462455		2113.58	0.05442992		2643.58	0.00278579		3173.57	0.03532964		3703.57	0.01152461		4233.57	0.08216389
523.8	-0.00823626		1053.79	-0.00693701		1583.79	0.04635319		2113.78	0.05437481		2643.78	0.00283525		3173.77	0.03527017		3703.77	0.01167607		4233.77	0.08236208
524	-0.00800282		1053.99	-0.00681687		1583.99	0.04614889		2113.98	0.0539552		2643.98	0.00334797		3173.97	0.03516364		3703.97	0.01169073		4233.97	0.08219425
524.2	-0.00697449		1054.19	-0.00666312		1584.19	0.04582499		2114.18	0.05339661		2644.18	0.00358738		3174.17	0.03431738		3704.17	0.01235138		4234.17	0.08145093
524.4	-0.00642456		1054.39	-0.00608638		1584.39	0.04631531		2114.38	0.05404713		2644.38	0.00373211		3174.37	0.03467398		3704.37	0.01331582		4234.37	0.08079904
524.6	-0.00606314		1054.59	-0.00535348		1584.59	0.04666755		2114.58	0.05399617		2644.58	0.00425095		3174.57	0.03485688		3704.57	0.01347126		4234.57	0.08077675
524.8	-0.00613967		1054.79	-0.00530855		1584.79	0.04668724		2114.78	0.05435609		2644.78	0.00405826		3174.77	0.03506363		3704.77	0.01372757		4234.77	0.0806999
525	-0.00610698		1054.99	-0.00578259		1584.99	0.04716721		2114.98	0.05352212		2644.98	0.00481047		3174.97	0.03487042		3704.97	0.01356182		4234.97	0.08043177
525.2	-0.00624307		1055.19	-0.00569139		1585.19	0.04859025		2115.18	0.05293976		2645.18	0.00423924		3175.17	0.03493291		3705.17	0.01248233		4235.17	0.08160051
525.4	-0.00546201		1055.39	-0.0064738		1585.39	0.04891861		2115.38	0.05194271		2645.38	0.00364776		3175.37	0.03487632		3705.37	0.01155726		4235.37	0.08217205
525.6	-0.00516414		1055.59	-0.00549718		1585.59	0.0491522		2115.58	0.05091822		2645.58	0.00427061		3175.57	0.03486		3705.57	0.01121613		4235.57	0.08260134
525.8	-0.00518335		1055.79	-0.00539362		1585.79	0.04921254		2115.78	0.0513813		2645.78	0.0041483		3175.77	0.03390194		3705.77	0.01095751		4235.77	0.08211989
526	-0.00578836		1055.99	-0.00539457		1585.99	0.04992026		2115.98	0.05126604		2645.98	0.00443695		3175.97	0.03358662		3705.97	0.01173252		4235.97	0.08202093
526.2	-0.00684776		1056.19	-0.00488046		1586.19	0.04908134		2116.18	0.05029449		2646.18	0.00452446		3176.17	0.03377668		3706.17	0.01095405		4236.17	0.0819866
526.4	-0.00748367		1056.39	-0.00517699		1586.39	0.04927436		2116.38	0.05095726		2646.38	0.00403759		3176.37	0.03426305		3706.37	0.00978604		4236.37	0.08143582
526.6	-0.00800333		1056.59	-0.0055851		1586.59	0.04914876		2116.58	0.05071735		2646.58	0.00454957		3176.57	0.03353054		3706.57	0.00929473		4236.57	0.08071691
526.8	-0.00884981		1056.79	-0.00606607		1586.79	0.04910876		2116.78	0.05013701		2646.78	0.00421759		3176.77	0.03316589		3706.77	0.00925615		4236.77	0.08003383
527	-0.00917927		1056.99	-0.00612929		1586.99	0.04850655		2116.98	0.05052385		2646.98	0.00566195		3176.97	0.0330873		3706.97	0.00950935		4236.97	0.0796674
527.2	-0.00837535		1057.19	-0.00617375		1587.19	0.04930611		2117.18	0.05149639		2647.18	0.00508136		3177.17	0.03420245		3707.17	0.00895541		4237.17	0.07918647
527.4	-0.00893476		1057.39	-0.00579844		1587.39	0.04890573		2117.38	0.05132829		2647.38	0.00453283		3177.37	0.03532565		3707.37	0.0089203		4237.37	0.07839521
527.6	-0.00868929		1057.59	-0.00559124		1587.59	0.04919415		2117.58	0.05096154		2647.58	0.00365032		3177.57	0.03596558		3707.57	0.0091568		4237.57	0.07870745
527.8	-0.0093064		1057.79	-0.00536351		1587.79	0.04888827		2117.78	0.05117987		2647.78	0.00324129		3177.77	0.03613137		3707.77	0.00941146		4237.77	0.07850258
528	-0.00964642		1057.99	-0.00468549		1587.99	0.04886678		2117.98	0.05097853		2647.98	0.00298937		3177.97	0.0356869		3707.97	0.00991966		4237.97	0.07768715
528.2	-0.00963646		1058.19	-0.00420975		1588.19	0.04859873		2118.18	0.05171251		2648.18	0.00338797		3178.17	0.03620196		3708.17	0.00996564		4238.17	0.07692048
528.4	-0.00935462		1058.39	-0.00336321		1588.39	0.04933729		2118.38	0.0520918		2648.38	0.00354942		3178.37	0.03689052		3708.37	0.00924529		4238.37	0.07707484
528.6	-0.00914404		1058.59	-0.00293984		1588.59	0.04956052		2118.58	0.05248174		2648.58	0.00340697		3178.57	0.03714818		3708.57	0.008852		4238.57	0.07784227
528.8	-0.00904915		1058.79	-0.00294143		1588.79	0.04981854		2118.78	0.05238752		2648.78	0.00272616		3178.77	0.03740109		3708.77	0.00944927		4238.77	0.07803576
529	-0.00877533		1058.99	-0.0035607		1588.99	0.04974383		2118.98	0.05213865		2648.98	0.00406039		3178.97	0.03759426		3708.97	0.00968212		4238.97	0.07919816
529.2	-0.00873276		1059.19	-0.00310668		1589.19	0.04948276		2119.18	0.05174139		2649.18	0.00349587		3179.17	0.03717286		3709.17	0.00928812		4239.17	0.08006826
529.4	-0.00826366		1059.39	-0.0034928		1589.39	0.04853591		2119.38	0.05177316		2649.38	0.00280386		3179.37	0.03673544		3709.37	0.01002312		4239.37	0.07950929
529.6	-0.0083393		1059.59	-0.00318711		1589.59	0.0481892		2119.58	0.05219841		2649.58	0.00359822		3179.57	0.03595308		3709.57	0.01055123		4239.57	0.0791842
529.8	-0.00865588		1059.79	-0.0032118		1589.79	0.04719179		2119.78	0.05319731		2649.78	0.00416009		3179.77	0.03530864		3709.77	0.01125823		4239.77	0.07861969
530	-0.0090717		1059.99	-0.00306511		1589.99	0.04710424		2119.98	0.05263573		2649.98	0.00489972		3179.97	0.03527556		3709.97	0.011383		4239.97	0.07882313
530.2	-0.00828903		1060.19	-0.00299865		1590.19	0.04649772		2120.18	0.05274606		2650.18	0.00553954		3180.17	0.03545017		3710.17	0.01098409		4240.17	0.07810818
530.4	-0.00765332		1060.39	-0.00308454		1590.39	0.04687253		2120.38	0.05282403		2650.38	0.00595286		3180.37	0.03470156		3710.37	0.01045016		4240.37	0.07798932
530.6	-0.00733196		1060.59	-0.00308893		1590.59	0.04637142		2120.58	0.05227118		2650.58	0.00670911		3180.57	0.03368976		3710.57	0.01084988		4240.57	0.07745095
530.8	-0.00800998		1060.79	-0.0038685		1590.79	0.04650195		2120.78	0.05177046		2650.78	0.0070077		3180.77	0.03310459		3710.77	0.01071149		4240.77	0.07796144
531	-0.00766359		1060.99	-0.00391054		1590.99	0.0465985		2120.98	0.05213888		2650.98	0.00789843		3180.97	0.03366608		3710.97	0.0111824		4240.97	0.07771199
531.2	-0.00723892		1061.19	-0.00371733		1591.19	0.0469844		2121.18	0.05206212		2651.18	0.00705699		3181.17	0.03381793		3711.17	0.01050574		4241.17	0.07743418
531.4	-0.00751207		1061.39	-0.00356381		1591.39	0.04719406		2121.38	0.05131268		2651.38	0.00659213		3181.37	0.0338828		3711.37	0.01044738		4241.37	0.07783204
531.6	-0.00757341		1061.59	-0.00329623		1591.59	0.04664464		2121.58	0.05168245		2651.58	0.0057536		3181.57	0.03369239		3711.57	0.0108829		4241.57	0.07909927
531.8	-0.00782734		1061.79	-0.00321419		1591.79	0.0471224		2121.78	0.05102725		2651.78	0.00608409		3181.77	0.03348812		3711.77	0.01044517		4241.77	0.07960049
532	-0.00793685		1061.99	-0.00237367		1591.99	0.04768981		2121.98	0.05100446		2651.98	0.00591182		3181.97	0.0338389		3711.97	0.01047493		4241.97	0.07957232
532.2	-0.00809941		1062.19	-0.00269425		1592.19	0.04802758		2122.18	0.05116849		2652.18	0.00593491		3182.17	0.03408181		3712.17	0.00954128		4242.17	0.07973419
532.4	-0.00802334		1062.39	-0.00304227		1592.39	0.04783709		2122.38	0.05105897		2652.38	0.00490155		3182.37	0.03426252		3712.37	0.00886246		4242.37	0.08014337
532.6	-0.00833817		1062.59	-0.00366263		1592.59	0.04923088		2122.58	0.05202748		2652.58	0.0031827		3182.57	0.0348271		3712.57	0.00913591		4242.57	0.08152028
532.8	-0.00790517		1062.79	-0.00518529		1592.79	0.04977947		2122.78	0.0518937		2652.78	0.00285312		3182.77	0.03560279		3712.77	0.0094685		4242.77	0.08210783
533	-0.0082577		1062.99	-0.00616665		1592.99	0.04991918		2122.98	0.05241719		2652.98	0.00292865		3182.97	0.03525606		3712.97	0.00917474		4242.97	0.08290466
533.2	-0.00879732		1063.19	-0.00687188		1593.19	0.04964906		2123.18	0.05194849		2653.18	0.00191837		3183.17	0.03535487		3713.17	0.00907958		4243.17	0.08226999
533.4	-0.00912321		1063.39	-0.00685371		1593.39	0.05010638		2123.38	0.05166679		2653.38	0.00130299		3183.37	0.03594349		3713.37	0.00984295		4243.37	0.08199594
533.6	-0.00921293		1063.59	-0.00704305		1593.59	0.04964228		2123.58	0.0515747		2653.58	0.00160578		3183.57	0.03548724		3713.57	0.01033186		4243.57	0.08283859
533.8	-0.00977659		1063.79	-0.00700802		1593.79	0.04879054		2123.78	0.05136855		2653.78	0.00203002		3183.77	0.03563049		3713.77	0.01069517		4243.77	0.08254682
534	-0.00953135		1063.99	-0.00684286		1593.99	0.04964059		2123.98	0.05076272		2653.98	0.00206859		3183.97	0.03556482		3713.97	0.01013203		4243.97	0.08271995
534.2	-0.00917372		1064.19	-0.00618568		1594.19	0.0488708		2124.18	0.0504695		2654.18	0.00294774		3184.17	0.03488497		3714.17	0.00890922		4244.17	0.08212199
534.4	-0.00998849		1064.39	-0.00607006		1594.39	0.0489473		2124.38	0.05048183		2654.38	0.00249564		3184.37	0.03395037		3714.37	0.00856832		4244.37	0.08221453
534.6	-0.01054224		1064.59	-0.00612257		1594.59	0.04784372		2124.58	0.0506416		2654.58	0.0031353		3184.57	0.03399375		3714.57	0.00912165		4244.57	0.08146038
534.8	-0.01086233		1064.79	-0.00677344		1594.79	0.0477164		2124.78	0.05175443		2654.78	0.00317127		3184.77	0.03417817		3714.77	0.00899599		4244.77	0.08180025
535	-0.01036739		1064.99	-0.00680838		1594.99	0.04685588		2124.98	0.05212986		2654.98	0.00375703		3184.97	0.03451437		3714.97	0.00914553		4244.97	0.08108967
535.2	-0.01015567		1065.19	-0.00720277		1595.19	0.04612645		2125.18	0.0526696		2655.18	0.0041419		3185.17	0.03418646		3715.17	0.00859338		4245.17	0.08040687
535.4	-0.01002046		1065.39	-0.00692172		1595.39	0.0456241		2125.38	0.05326397		2655.38	0.00431933		3185.37	0.03424382		3715.37	0.0090128		4245.37	0.0805849
535.6	-0.01028326		1065.59	-0.00684452		1595.59	0.04496608		2125.58	0.05381615		2655.58	0.00382548		3185.57	0.03386595		3715.57	0.00938115		4245.57	0.08104283
535.8	-0.01043951		1065.79	-0.00721353		1595.79	0.04570254		2125.78	0.05400721		2655.78	0.00394921		3185.77	0.03384054		3715.77	0.0093512		4245.77	0.08127189
536	-0.01070139		1065.99	-0.00684938		1595.99	0.0458827		2125.98	0.05392095		2655.98	0.00349273		3185.97	0.03468271		3715.97	0.00878308		4245.97	0.08035964
536.2	-0.00995133		1066.19	-0.0075707		1596.19	0.04614974		2126.18	0.05454838		2656.18	0.00301734		3186.17	0.0343673		3716.17	0.00909556		4246.17	0.08064549
536.4	-0.00959261		1066.39	-0.00787068		1596.39	0.04709039		2126.38	0.05525893		2656.38	0.00165778		3186.37	0.03465992		3716.37	0.00907452		4246.37	0.08103699
536.6	-0.00875601		1066.59	-0.00794038		1596.59	0.04750189		2126.58	0.05557047		2656.58	0.0017904		3186.57	0.03521253		3716.57	0.00953812		4246.57	0.08192853
536.8	-0.00736107		1066.79	-0.00846393		1596.79	0.04688504		2126.78	0.05491867		2656.78	0.00241537		3186.77	0.03518845		3716.77	0.00978035		4246.77	0.08127019
537	-0.00718463		1066.99	-0.00785181		1596.99	0.04706945		2126.98	0.05494287		2656.98	0.00214665		3186.97	0.03505994		3716.97	0.01035385		4246.97	0.08078206
537.2	-0.00746446		1067.19	-0.00784936		1597.19	0.0469525		2127.18	0.05355028		2657.18	0.00229805		3187.17	0.03557773		3717.17	0.01075094		4247.17	0.08026097
537.4	-0.00754384		1067.39	-0.00780869		1597.39	0.04744071		2127.38	0.0532572		2657.38	0.00156193		3187.37	0.03557526		3717.37	0.01053182		4247.37	0.08116135
537.6	-0.00722633		1067.59	-0.00803458		1597.59	0.04726483		2127.58	0.05207083		2657.58	0.0017835		3187.57	0.03513064		3717.57	0.01010712		4247.57	0.08188321
537.8	-0.00791949		1067.79	-0.00752285		1597.79	0.04672979		2127.78	0.05104295		2657.78	0.00159419		3187.77	0.03562179		3717.77	0.01006246		4247.77	0.08219445
538	-0.00756702		1067.99	-0.00723244		1597.99	0.04730346		2127.98	0.05072895		2657.98	0.00104261		3187.97	0.03527409		3717.97	0.00901718		4247.97	0.08246341
538.2	-0.00809233		1068.19	-0.0073688		1598.19	0.04689459		2128.18	0.05075601		2658.18	0.00163831		3188.17	0.03507492		3718.17	0.00864365		4248.17	0.08184657
538.4	-0.0079914		1068.39	-0.00826767		1598.39	0.04801736		2128.38	0.0507823		2658.38	0.00102182		3188.37	0.03489704		3718.37	0.00956264		4248.37	0.08127387
538.6	-0.0075134		1068.59	-0.0083279		1598.59	0.04706249		2128.58	0.05127945		2658.58	0.00157656		3188.57	0.03543		3718.57	0.00939726		4248.57	0.08047125
538.8	-0.00712868		1068.79	-0.0078243		1598.79	0.04731831		2128.78	0.05243987		2658.78	0.00178735		3188.77	0.03554629		3718.77	0.00945135		4248.77	0.08030346
539	-0.00707307		1068.99	-0.00742321		1598.99	0.04746699		2128.98	0.05164272		2658.98	0.00245219		3188.97	0.03543794		3718.97	0.00900772		4248.97	0.07993604
539.2	-0.00792919		1069.19	-0.00661404		1599.19	0.04843662		2129.18	0.05172078		2659.18	0.00233944		3189.17	0.03555129		3719.17	0.00841117		4249.17	0.07918564
539.4	-0.00864949		1069.39	-0.00602491		1599.39	0.0485477		2129.38	0.05115544		2659.38	0.00236511		3189.37	0.03642402		3719.37	0.00863437		4249.37	0.07935105
539.6	-0.00836427		1069.59	-0.00591684		1599.59	0.04846666		2129.58	0.05121753		2659.58	0.00246481		3189.57	0.03572096		3719.57	0.00858316		4249.57	0.07934215
539.8	-0.00861609		1069.79	-0.00533914		1599.79	0.04900433		2129.78	0.05127895		2659.78	0.00354895		3189.77	0.03634166		3719.77	0.00858811		4249.77	0.07968766
540	-0.00887179		1069.99	-0.00472962		1599.99	0.04939958		2129.98	0.05096728		2659.98	0.00398348		3189.97	0.03683816		3719.97	0.00853751		4249.97	0.07879204
540.2	-0.00868641		1070.19	-0.00455891		1600.19	0.04941666		2130.18	0.05172495		2660.18	0.0036671		3190.17	0.03637292		3720.17	0.00836641		4250.17	0.079102
540.4	-0.00907655		1070.39	-0.00442086		1600.39	0.0492968		2130.38	0.05160139		2660.38	0.00397386		3190.37	0.03546049		3720.37	0.00915284		4250.37	0.07904579
540.6	-0.00898294		1070.59	-0.00413365		1600.59	0.04863511		2130.58	0.05095057		2660.58	0.00461239		3190.57	0.03467094		3720.57	0.00907526		4250.57	0.0784595
540.8	-0.00794464		1070.79	-0.00459732		1600.79	0.04881637		2130.78	0.05051445		2660.78	0.0050993		3190.77	0.03409659		3720.77	0.00919416		4250.77	0.07786879
541	-0.00814123		1070.99	-0.0050102		1600.99	0.04835679		2130.98	0.05030237		2660.98	0.00547471		3190.97	0.03356696		3720.97	0.00946149		4250.97	0.07814545
541.2	-0.00824585		1071.19	-0.00541097		1601.19	0.04761014		2131.18	0.04915997		2661.18	0.00566998		3191.17	0.03324635		3721.17	0.00868682		4251.17	0.0788193
541.4	-0.00791142		1071.39	-0.00607161		1601.39	0.04708831		2131.38	0.04883865		2661.38	0.00523691		3191.37	0.03281525		3721.37	0.00912843		4251.37	0.0787982
541.6	-0.00757533		1071.59	-0.00554401		1601.59	0.04567669		2131.58	0.04780292		2661.58	0.00565729		3191.57	0.03289887		3721.57	0.0098364		4251.57	0.07945311
541.8	-0.00774002		1071.79	-0.00527081		1601.79	0.04406633		2131.78	0.04800099		2661.78	0.00482271		3191.77	0.03326271		3721.77	0.0095518		4251.77	0.07952529
542	-0.00779903		1071.99	-0.00600538		1601.99	0.04409414		2131.98	0.04859854		2661.98	0.00499672		3191.97	0.03259936		3721.97	0.00859849		4251.97	0.07940741
542.2	-0.00749602		1072.19	-0.00622194		1602.19	0.04396935		2132.18	0.04836658		2662.18	0.00490224		3192.17	0.03243339		3722.17	0.00895024		4252.17	0.07963539
542.4	-0.00627706		1072.39	-0.00631654		1602.39	0.04415245		2132.38	0.04844047		2662.38	0.00406111		3192.37	0.03189459		3722.37	0.00823716		4252.37	0.07997979
542.6	-0.00681883		1072.59	-0.0058648		1602.59	0.04427293		2132.58	0.04941855		2662.58	0.00436886		3192.57	0.03235237		3722.57	0.0079656		4252.57	0.08087776
542.8	-0.00715688		1072.79	-0.00562014		1602.79	0.04498522		2132.78	0.05005198		2662.78	0.00478498		3192.77	0.03264197		3722.77	0.00798374		4252.77	0.08161747
543	-0.00815576		1072.99	-0.0051094		1602.99	0.04611998		2132.98	0.04971413		2662.98	0.00491172		3192.97	0.03311925		3722.97	0.0073964		4252.97	0.08224881
543.2	-0.00891571		1073.19	-0.00505518		1603.19	0.04687988		2133.18	0.04971738		2663.18	0.00433641		3193.17	0.03372347		3723.17	0.0076583		4253.17	0.08248337
543.4	-0.00844438		1073.39	-0.00558166		1603.39	0.04730893		2133.38	0.05046534		2663.38	0.00496078		3193.37	0.0344368		3723.37	0.00826383		4253.37	0.08212567
543.6	-0.00740366		1073.59	-0.00529177		1603.59	0.04752577		2133.58	0.05135939		2663.58	0.00489487		3193.57	0.03467497		3723.57	0.00875223		4253.57	0.08277333
543.8	-0.00795666		1073.79	-0.0053486		1603.79	0.04836622		2133.78	0.05139802		2663.78	0.00480599		3193.77	0.03558096		3723.77	0.00878036		4253.77	0.08302441
544	-0.00833156		1073.99	-0.00644772		1603.99	0.0493036		2133.98	0.05122272		2663.98	0.00427049		3193.97	0.03522987		3723.97	0.00938393		4253.97	0.08319402
544.2	-0.0084271		1074.19	-0.0064972		1604.19	0.05000518		2134.18	0.05137968		2664.18	0.00357891		3194.17	0.03450202		3724.17	0.00901911		4254.17	0.08339515
544.4	-0.00838792		1074.39	-0.00721365		1604.39	0.05011847		2134.38	0.05140725		2664.38	0.00384568		3194.37	0.03406861		3724.37	0.01074918		4254.37	0.08290358
544.6	-0.00844404		1074.59	-0.00723256		1604.59	0.05005526		2134.58	0.05152803		2664.58	0.00337442		3194.57	0.03432172		3724.57	0.01079126		4254.57	0.08168307
544.8	-0.00785703		1074.79	-0.00779957		1604.79	0.04967557		2134.78	0.05191672		2664.78	0.00318628		3194.77	0.03424758		3724.77	0.01167047		4254.77	0.08106277
545	-0.00819076		1074.99	-0.00797438		1604.99	0.04902686		2134.98	0.05212943		2664.98	0.00272045		3194.97	0.03412162		3724.97	0.01192022		4254.97	0.08194783
545.2	-0.00917724		1075.19	-0.00787277		1605.19	0.04857506		2135.18	0.05241895		2665.18	0.00254913		3195.17	0.03440887		3725.17	0.01155913		4255.17	0.08131698
545.4	-0.00973444		1075.39	-0.00782351		1605.39	0.04798609		2135.38	0.05287891		2665.38	0.00311375		3195.37	0.03391458		3725.37	0.01230714		4255.37	0.08010686
545.6	-0.01048037		1075.59	-0.0077173		1605.59	0.04667108		2135.58	0.05326013		2665.58	0.00297926		3195.57	0.03445503		3725.57	0.01159691		4255.57	0.08024234
545.8	-0.01109156		1075.79	-0.00825264		1605.79	0.04603859		2135.78	0.05319395		2665.78	0.00242151		3195.77	0.03463824		3725.77	0.01000006		4255.77	0.07931432
546	-0.01161142		1075.99	-0.00858785		1605.99	0.04596423		2135.98	0.05323201		2665.98	0.00261027		3195.97	0.03455494		3725.97	0.00906221		4255.97	0.07885663
546.2	-0.01243482		1076.19	-0.00924851		1606.19	0.04536866		2136.18	0.05334855		2666.18	0.00188062		3196.17	0.03516425		3726.17	0.00861787		4256.17	0.07795946
546.4	-0.01254506		1076.39	-0.00974785		1606.39	0.04543675		2136.38	0.0536316		2666.38	0.00196537		3196.37	0.03556651		3726.37	0.0079184		4256.37	0.07798432
546.6	-0.01401708		1076.59	-0.00946625		1606.59	0.04570698		2136.58	0.05406272		2666.58	0.00219678		3196.57	0.03593874		3726.57	0.00798373		4256.57	0.07752373
546.8	-0.01451701		1076.79	-0.00937694		1606.79	0.04459463		2136.78	0.05395451		2666.78	0.00200945		3196.77	0.03576286		3726.77	0.00766872		4256.77	0.0775481
547	-0.01440583		1076.99	-0.00888997		1606.99	0.04436676		2136.98	0.05330393		2666.98	0.00216419		3196.97	0.03606032		3726.97	0.00721834		4256.97	0.07731231
547.2	-0.01387535		1077.19	-0.0088654		1607.19	0.04462668		2137.18	0.05290395		2667.18	0.00232222		3197.17	0.03543375		3727.17	0.00717039		4257.17	0.0772783
547.4	-0.01303628		1077.39	-0.00884731		1607.39	0.0449406		2137.38	0.05319522		2667.38	0.00390048		3197.37	0.03641771		3727.37	0.00657232		4257.37	0.07714769
547.6	-0.01343726		1077.59	-0.00880142		1607.59	0.04448408		2137.58	0.05152968		2667.58	0.00344079		3197.57	0.03660817		3727.57	0.00631875		4257.57	0.07806367
547.8	-0.01304801		1077.79	-0.00929131		1607.79	0.04465103		2137.78	0.05043451		2667.78	0.00405095		3197.77	0.03548		3727.77	0.0062313		4257.77	0.07769535
548	-0.01209022		1077.99	-0.00982422		1607.99	0.04498209		2137.98	0.049592		2667.98	0.00383745		3197.97	0.03468379		3727.97	0.0066879		4257.97	0.07822066
548.2	-0.01101724		1078.19	-0.0095937		1608.19	0.04453018		2138.18	0.04940641		2668.18	0.00422371		3198.17	0.03398793		3728.17	0.00625599		4258.17	0.07768726
548.4	-0.00982634		1078.39	-0.00945551		1608.39	0.04386454		2138.38	0.0492706		2668.38	0.00438074		3198.37	0.03401737		3728.37	0.00669808		4258.37	0.07850172
548.6	-0.00932679		1078.59	-0.00961571		1608.59	0.04460743		2138.58	0.04905362		2668.58	0.00396324		3198.57	0.03290997		3728.57	0.00701588		4258.57	0.07901206
548.8	-0.00857045		1078.79	-0.00986194		1608.79	0.04581142		2138.78	0.04901042		2668.78	0.00395884		3198.77	0.03243889		3728.77	0.00677239		4258.77	0.0799341
549	-0.00845856		1078.99	-0.01081579		1608.99	0.04638534		2138.98	0.04878066		2668.98	0.00347592		3198.97	0.0324533		3728.97	0.00720218		4258.97	0.08177171
549.2	-0.00856127		1079.19	-0.01072473		1609.19	0.04723206		2139.18	0.04886978		2669.18	0.00355968		3199.17	0.03186292		3729.17	0.00666164		4259.17	0.08115759
549.4	-0.00780504		1079.39	-0.01013868		1609.39	0.04726204		2139.38	0.04924746		2669.38	0.00302208		3199.37	0.03157865		3729.37	0.00648851		4259.37	0.08085458
549.6	-0.00812587		1079.59	-0.01082236		1609.59	0.04700209		2139.58	0.04917043		2669.58	0.00252679		3199.57	0.03253595		3729.57	0.00598144		4259.57	0.08080669
549.8	-0.0078956		1079.79	-0.01107158		1609.79	0.04779572		2139.78	0.0489448		2669.78	0.00237462		3199.77	0.03287217		3729.77	0.00551196		4259.77	0.0799251
550	-0.00840363		1079.99	-0.01184759		1609.99	0.04818835		2139.98	0.04946596		2669.98	0.00178848		3199.97	0.03330151		3729.97	0.00488655		4259.97	0.07917643
550.2	-0.00904172		1080.19	-0.01163973		1610.19	0.04832954		2140.18	0.04982814		2670.18	0.00072217		3200.17	0.03422481		3730.17	0.00530312		4260.17	0.07862037
550.4	-0.00868904		1080.39	-0.0111844		1610.39	0.04826584		2140.38	0.05005399		2670.38	0.0010229		3200.37	0.03378782		3730.37	0.00601897		4260.37	0.07934191
550.6	-0.00973467		1080.59	-0.01034695		1610.59	0.04794651		2140.58	0.05117062		2670.58	0.00087462		3200.57	0.03361581		3730.57	0.00690744		4260.57	0.0795724
550.8	-0.01060261		1080.79	-0.0103859		1610.79	0.04675372		2140.78	0.05124681		2670.78	0.00088155		3200.77	0.03409168		3730.77	0.00655836		4260.77	0.07969244
551	-0.01153563		1080.99	-0.0106526		1610.99	0.0468748		2140.98	0.05222999		2670.98	0.00182065		3200.97	0.03453676		3730.97	0.00688856		4260.97	0.07970572
551.2	-0.0120267		1081.19	-0.01081149		1611.19	0.04705401		2141.18	0.0532223		2671.18	0.00298558		3201.17	0.03404916		3731.17	0.00782181		4261.17	0.08006485
551.4	-0.01278796		1081.39	-0.01080114		1611.39	0.04634297		2141.38	0.0535798		2671.38	0.0041686		3201.37	0.03487871		3731.37	0.00807953		4261.37	0.07995967
551.6	-0.01480912		1081.59	-0.01072056		1611.59	0.0459536		2141.58	0.05376649		2671.58	0.00357601		3201.57	0.03472174		3731.57	0.00900739		4261.57	0.08020165
551.8	-0.01446502		1081.79	-0.01026079		1611.79	0.04594842		2141.78	0.05431722		2671.78	0.00403422		3201.77	0.03445322		3731.77	0.0092745		4261.77	0.07946864
552	-0.01426032		1081.99	-0.00922518		1611.99	0.04580333		2141.98	0.0542672		2671.98	0.00360549		3201.97	0.0339782		3731.97	0.00903653		4261.97	0.08028354
552.2	-0.01397231		1082.19	-0.00797431		1612.19	0.04555412		2142.18	0.05388341		2672.18	0.00440494		3202.17	0.03381925		3732.17	0.00846568		4262.17	0.08033211
552.4	-0.01295899		1082.39	-0.00708932		1612.39	0.04502649		2142.38	0.05277689		2672.38	0.00426974		3202.37	0.03435846		3732.37	0.0085939		4262.37	0.08159767
552.6	-0.0134672		1082.59	-0.00708323		1612.59	0.04484438		2142.58	0.05194417		2672.58	0.00393637		3202.57	0.0342963		3732.57	0.01002086		4262.57	0.0817248
552.8	-0.01337772		1082.79	-0.0063114		1612.79	0.04460755		2142.78	0.05157941		2672.78	0.00398204		3202.77	0.03462575		3732.77	0.00927625		4262.77	0.08148174
553	-0.01329281		1082.99	-0.00638124		1612.99	0.04435928		2142.98	0.05128041		2672.98	0.00309899		3202.97	0.03409877		3732.97	0.00940824		4262.97	0.08122907
553.2	-0.01272848		1083.19	-0.00590077		1613.19	0.04408413		2143.18	0.05070409		2673.18	0.00335413		3203.17	0.03451096		3733.17	0.00876927		4263.17	0.08085269
553.4	-0.01208428		1083.39	-0.00523253		1613.39	0.04357429		2143.38	0.05002204		2673.38	0.00276411		3203.37	0.03534355		3733.37	0.00826578		4263.37	0.08064083
553.6	-0.01186448		1083.59	-0.00644306		1613.59	0.04435392		2143.58	0.04960069		2673.58	0.00242791		3203.57	0.03575805		3733.57	0.00721787		4263.57	0.08070484
553.8	-0.01134706		1083.79	-0.00696366		1613.79	0.04503191		2143.78	0.04859099		2673.78	0.00142483		3203.77	0.03580307		3733.77	0.00674514		4263.77	0.08068693
554	-0.01126363		1083.99	-0.00767264		1613.99	0.04521133		2143.98	0.04909449		2673.98	0.00107422		3203.97	0.03590267		3733.97	0.00536251		4263.97	0.08038723
554.2	-0.00974533		1084.19	-0.0069267		1614.19	0.04540306		2144.18	0.04874681		2674.18	0.00129534		3204.17	0.03534881		3734.17	0.0050547		4264.17	0.08068604
554.4	-0.00924459		1084.39	-0.00756998		1614.39	0.04549518		2144.38	0.04934628		2674.38	0.00179348		3204.37	0.0346689		3734.37	0.00538828		4264.37	0.08032582
554.6	-0.00990308		1084.59	-0.00838684		1614.59	0.04589469		2144.58	0.05056591		2674.58	0.00173945		3204.57	0.03491003		3734.57	0.00504164		4264.57	0.07990572
554.8	-0.00994885		1084.79	-0.0087621		1614.79	0.04583553		2144.78	0.05054359		2674.78	0.00173878		3204.77	0.03448484		3734.77	0.00488193		4264.77	0.07954295
555	-0.00939263		1084.99	-0.00954892		1614.99	0.04606314		2144.98	0.05133101		2674.98	0.00206854		3204.97	0.03420323		3734.97	0.00555421		4264.97	0.07956026
555.2	-0.00907953		1085.19	-0.01013762		1615.19	0.04607317		2145.18	0.05282725		2675.18	0.00221183		3205.17	0.03358883		3735.17	0.00614388		4265.17	0.07972336
555.4	-0.00970127		1085.39	-0.00937907		1615.39	0.04686514		2145.38	0.05272036		2675.38	0.00196484		3205.37	0.03365426		3735.37	0.00686183		4265.37	0.07934476
555.6	-0.01061178		1085.59	-0.0083647		1615.59	0.04709262		2145.58	0.05338628		2675.58	0.00142575		3205.57	0.0335139		3735.57	0.00666973		4265.57	0.07903853
555.8	-0.01074505		1085.79	-0.00727198		1615.79	0.04696428		2145.78	0.05303494		2675.78	0.00141806		3205.77	0.0327714		3735.77	0.00620798		4265.77	0.07863606
556	-0.01004806		1085.99	-0.00591735		1615.99	0.04643941		2145.98	0.05200775		2675.98	0.0013259		3205.97	0.03249465		3735.97	0.00656944		4265.97	0.07954721
556.2	-0.0106466		1086.19	-0.00549237		1616.19	0.04651208		2146.18	0.05191533		2676.18	0.00118542		3206.17	0.03299734		3736.17	0.00670029		4266.17	0.07923251
556.4	-0.01082837		1086.39	-0.0055351		1616.39	0.0460145		2146.38	0.05112295		2676.38	0.00112663		3206.37	0.03360938		3736.37	0.00824715		4266.37	0.07958269
556.6	-0.01217757		1086.59	-0.00565374		1616.59	0.04592266		2146.58	0.0514422		2676.58	0.00173228		3206.57	0.03369681		3736.57	0.00912758		4266.57	0.07902537
556.8	-0.01254197		1086.79	-0.0060195		1616.79	0.04604334		2146.78	0.05148993		2676.78	0.00221361		3206.77	0.03336977		3736.77	0.00851169		4266.77	0.07836475
557	-0.01286173		1086.99	-0.00611639		1616.99	0.0461231		2146.98	0.05197054		2676.98	0.00260322		3206.97	0.03311876		3736.97	0.00909657		4266.97	0.07795233
557.2	-0.01263502		1087.19	-0.00594779		1617.19	0.04590507		2147.18	0.05105811		2677.18	0.00282408		3207.17	0.03438573		3737.17	0.00967081		4267.17	0.07806945
557.4	-0.01337804		1087.39	-0.00631503		1617.39	0.04641684		2147.38	0.05084764		2677.38	0.00288853		3207.37	0.03504519		3737.37	0.0095601		4267.37	0.07794565
557.6	-0.0137398		1087.59	-0.00752306		1617.59	0.04669276		2147.58	0.05085256		2677.58	0.00218186		3207.57	0.03460796		3737.57	0.00874881		4267.57	0.07757592
557.8	-0.01376235		1087.79	-0.00796316		1617.79	0.04643069		2147.78	0.05035252		2677.78	0.00203377		3207.77	0.03450666		3737.77	0.0089965		4267.77	0.07726845
558	-0.01326816		1087.99	-0.00855682		1617.99	0.04636638		2147.98	0.05075012		2677.98	0.00249323		3207.97	0.03430628		3737.97	0.00837168		4267.97	0.07679622
558.2	-0.01271671		1088.19	-0.00886388		1618.19	0.0465618		2148.18	0.05031818		2678.18	0.00249805		3208.17	0.03367245		3738.17	0.00831809		4268.17	0.07670065
558.4	-0.01324453		1088.39	-0.00972132		1618.39	0.04670519		2148.38	0.05060105		2678.38	0.00244549		3208.37	0.03371377		3738.37	0.00865359		4268.37	0.07637532
558.6	-0.01334826		1088.59	-0.01053126		1618.59	0.04669865		2148.58	0.05089075		2678.58	0.00255399		3208.57	0.0332679		3738.57	0.00836859		4268.57	0.07667608
558.8	-0.01293073		1088.79	-0.01074673		1618.79	0.0465285		2148.78	0.05070819		2678.78	0.00246755		3208.77	0.03268817		3738.77	0.00844619		4268.77	0.07708293
559	-0.01273447		1088.99	-0.01150146		1618.99	0.04624528		2148.98	0.05114942		2678.98	0.00244397		3208.97	0.03286338		3738.97	0.00805824		4268.97	0.07732019
559.2	-0.01304709		1089.19	-0.01185649		1619.19	0.04614964		2149.18	0.0519703		2679.18	0.00259501		3209.17	0.03215858		3739.17	0.0083348		4269.17	0.07768565
559.4	-0.01322065		1089.39	-0.01113465		1619.39	0.04632697		2149.38	0.05161852		2679.38	0.00298051		3209.37	0.03179677		3739.37	0.00826718		4269.37	0.07742659
559.6	-0.01333389		1089.59	-0.01101607		1619.59	0.04566452		2149.58	0.05214327		2679.58	0.00304417		3209.57	0.03125299		3739.57	0.0072342		4269.57	0.07771587
559.8	-0.01332257		1089.79	-0.01121248		1619.79	0.04540811		2149.78	0.05223022		2679.78	0.00320042		3209.77	0.03114865		3739.77	0.00703883		4269.77	0.07815473
