# Supplementary material for: Functional development of a V3/glycan-specific broadly neutralizing antibody isolated from a case of HIV superinfection
Source: eLife journal article supplement (doi:10.7554/elife.68110), 2021-07-15
Supplement: fig4-data2 [file D3.xls]

Vers 3.43 Data Simulation
Conc1	6.25E-08	6.25E-08	6.25E-08	6.25E-08	6.25E-08	6.25E-08	6.25E-08	6.25E-08
Start1	200	729.99	1259.99	1789.99	2319.98	2849.98	3379.97	3909.97
Stop1	559.8	1089.79	1619.79	2149.78	2679.78	3209.77	3739.77	4269.77
Time1	Data1	Sim1	Time2	Data2	Sim2	Time3	Data3	Sim3	Time4	Data4	Sim4	Time5	Data5	Sim5	Time6	Data6	Sim6	Time7	Data7	Sim7	Time8	Data8	Sim8
200	-0.00141947		729.99	0.00565129		1259.99	0.00088838		1789.99	0.00079723		2319.98	-0.00255862		2849.98	-0.00453302		3379.97	-0.00652824		3909.97	-0.00499964
200.2	-0.00116927		730.19	0.00536341		1260.19	-0.00020881		1790.19	0.00061931		2320.18	-0.00266595		2850.18	-0.00546468		3380.17	-0.00513549		3910.17	-0.00460237
200.4	-0.00138527		730.39	0.00595433		1260.39	-0.00087981		1790.39	0.0008292		2320.38	-0.00226232		2850.38	-0.0061552		3380.37	-0.00415134		3910.37	-0.00463908
200.6	-0.00123321		730.59	0.00679178		1260.59	-0.00128327		1790.59	0.00046825		2320.58	-0.0019999		2850.58	-0.00671992		3380.57	-0.00286966		3910.57	-0.00438158
200.8	-0.00037667		730.79	0.00740189		1260.79	-0.00156403		1790.79	0.00048558		2320.78	-0.00161113		2850.78	-0.0077691		3380.77	-0.00157078		3910.77	-0.0047975
201	-0.00021202		730.99	0.0080282		1260.99	-0.00147454		1790.99	0.00061931		2320.98	-0.00156503		2850.98	-0.00706951		3380.97	-0.00048754		3910.97	-0.00476061
201.2	-0.00017166		731.19	0.0082031		1261.19	-0.00118972		1791.19	0.00122838		2321.18	-0.00143052		2851.18	-0.00670209		3381.17	-0.00010252		3911.17	-0.00483932
201.4	-0.00023598		731.39	0.00864574		1261.39	-0.00104638		1791.39	0.00130567		2321.38	-0.00199852		2851.38	-0.00652564		3381.37	0.00047475		3911.37	-0.00505083
201.6	0.00003589		731.59	0.00890074		1261.59	0.00003307		1791.59	0.00177141		2321.58	-0.00240233		2851.58	-0.00626315		3381.57	0.00108318		3911.57	-0.00536779
201.8	0.00021574		731.79	0.00944014		1261.79	-0.00008304		1791.79	0.00174538		2321.78	-0.00287467		2851.78	-0.00558155		3381.77	0.00103592		3911.77	-0.00568938
202	0.00009789		731.99	0.0095057		1261.99	0.00068902		1791.99	0.00119956		2321.98	-0.00381483		2851.98	-0.0049339		3381.97	0.00059437		3911.97	-0.00567825
202.2	0.00008071		732.19	0.01003116		1262.19	0.00138455		1792.19	0.00103681		2322.18	-0.00381588		2852.18	-0.00347201		3382.17	-0.00070042		3912.17	-0.00523653
202.4	0.00040717		732.39	0.01023035		1262.39	0.00062817		1792.39	0.00081388		2322.38	-0.00485565		2852.38	-0.00251273		3382.37	-0.00094569		3912.37	-0.00566229
202.6	0.00077868		732.59	0.01041919		1262.59	0.00035946		1792.59	0.00073179		2322.58	-0.00466822		2852.58	-0.00225583		3382.57	-0.00245895		3912.57	-0.0061822
202.8	-0.00005209		732.79	0.00922658		1262.79	0.00084371		1792.79	0.00048312		2322.78	-0.00468419		2852.78	-0.00213826		3382.77	-0.00372727		3912.77	-0.0061565
203	-0.00060231		732.99	0.00880579		1262.99	0.00126744		1792.99	0.00014776		2322.98	-0.00335912		2852.98	-0.00150662		3382.97	-0.00447328		3912.97	-0.00599295
203.2	-0.00145192		733.19	0.00690555		1263.19	0.00136611		1793.19	0.00011974		2323.18	-0.00363348		2853.18	-0.00184428		3383.17	-0.00457208		3913.17	-0.0058738
203.4	-0.00136094		733.39	0.00630854		1263.39	0.00111278		1793.39	0.00028975		2323.38	-0.00364395		2853.38	-0.0027327		3383.37	-0.00498548		3913.37	-0.00590322
203.6	-0.00096137		733.59	0.00621846		1263.59	0.00083308		1793.59	-0.000066		2323.58	-0.00339673		2853.58	-0.00423942		3383.57	-0.00483179		3913.57	-0.00603927
203.8	-0.00104777		733.79	0.00564907		1263.79	-0.00002107		1793.79	-0.00007817		2323.78	-0.00384881		2853.78	-0.00587824		3383.77	-0.00438001		3913.77	-0.00541568
204	-0.00063407		733.99	0.00579589		1263.99	-0.00018706		1793.99	0.00097742		2323.98	-0.00320852		2853.98	-0.00646331		3383.97	-0.00366296		3913.97	-0.00526532
204.2	-0.00155929		734.19	0.00570131		1264.19	-0.00019242		1794.19	0.00044103		2324.18	-0.00494828		2854.18	-0.00685223		3384.17	-0.00304976		3914.17	-0.00541709
204.4	-0.00180757		734.39	0.00614762		1264.39	0.00043564		1794.39	0.00108398		2324.38	-0.00467925		2854.38	-0.00683033		3384.37	-0.00240847		3914.37	-0.00515837
204.6	-0.00180853		734.59	0.00591946		1264.59	0.00069132		1794.59	0.00126791		2324.58	-0.00435487		2854.58	-0.00752588		3384.57	-0.00218521		3914.57	-0.00508941
204.8	-0.00192302		734.79	0.00585246		1264.79	0.00128811		1794.79	0.00188879		2324.78	-0.0043107		2854.78	-0.007607		3384.77	-0.00254785		3914.77	-0.00537595
205	-0.00272019		734.99	0.00531747		1264.99	0.00199243		1794.99	0.00291499		2324.98	-0.0055225		2854.98	-0.00671636		3384.97	-0.00240846		3914.97	-0.005122
205.2	-0.00278503		735.19	0.00517394		1265.19	0.0020554		1795.19	0.00256641		2325.18	-0.00595628		2855.18	-0.00690901		3385.17	-0.00260326		3915.17	-0.00470274
205.4	-0.0024978		735.39	0.00515943		1265.39	0.00190769		1795.39	0.00229532		2325.38	-0.00724336		2855.38	-0.00678271		3385.37	-0.00217209		3915.37	-0.00491933
205.6	-0.00248498		735.59	0.00553375		1265.59	0.00273344		1795.59	0.00255985		2325.58	-0.00755883		2855.58	-0.00646022		3385.57	-0.00274094		3915.57	-0.00523896
205.8	-0.00230424		735.79	0.00525164		1265.79	0.00149118		1795.79	0.00088303		2325.78	-0.0074284		2855.78	-0.00612897		3385.77	-0.00353656		3915.77	-0.00522238
206	-0.00231345		735.99	0.00489416		1265.99	0.00086529		1795.99	0.00041507		2325.98	-0.00726627		2855.98	-0.00565385		3385.97	-0.004811		3915.97	-0.00498449
206.2	-0.00097982		736.19	0.00528524		1266.19	0.00009781		1796.19	0.00019649		2326.18	-0.00719453		2856.18	-0.0044824		3386.17	-0.00584704		3916.17	-0.00455151
206.4	-0.00064791		736.39	0.00610167		1266.39	0.00004684		1796.39	-0.00034923		2326.38	-0.00765939		2856.38	-0.00440778		3386.37	-0.00640782		3916.37	-0.00481388
206.6	-0.00070189		736.59	0.00514994		1266.59	0.0002806		1796.59	-0.00136281		2326.58	-0.00747733		2856.58	-0.0045112		3386.57	-0.00766443		3916.57	-0.0047334
206.8	-0.00129572		736.79	0.0045846		1266.79	0.00032371		1796.79	-0.00112112		2326.78	-0.00740766		2856.78	-0.00474509		3386.77	-0.00774546		3916.77	-0.00423817
207	-0.00128244		736.99	0.00436659		1266.99	0.00012833		1796.99	-0.00128575		2326.98	-0.00718986		2856.98	-0.00470901		3386.97	-0.0074544		3916.97	-0.00430176
207.2	-0.00113809		737.19	0.00466015		1267.19	0.00054381		1797.19	-0.00128058		2327.18	-0.00745106		2857.18	-0.00446002		3387.17	-0.0071678		3917.17	-0.00386517
207.4	-0.00068516		737.39	0.0052099		1267.39	0.00020373		1797.39	-0.00108967		2327.38	-0.00783501		2857.38	-0.00549519		3387.37	-0.00651748		3917.37	-0.00415619
207.6	0.00008982		737.59	0.00543767		1267.59	-0.0000828		1797.59	-0.00011411		2327.58	-0.00815839		2857.58	-0.00600307		3387.57	-0.00580714		3917.57	-0.00365336
207.8	0.00013155		737.79	0.00484754		1267.79	-0.0012221		1797.79	0.00047709		2327.78	-0.00883238		2857.78	-0.0063101		3387.77	-0.00546081		3917.77	-0.00412112
208	-0.00014294		737.99	0.0052407		1267.99	-0.00128959		1797.99	0.00150449		2327.98	-0.00820199		2857.98	-0.00597492		3387.97	-0.00511322		3917.97	-0.00401043
208.2	-0.00055407		738.19	0.00569202		1268.19	-0.00068538		1798.19	0.00107055		2328.18	-0.00817432		2858.18	-0.00596654		3388.17	-0.00510448		3918.17	-0.00424131
208.4	-0.00065369		738.39	0.00553592		1268.39	-0.00066286		1798.39	0.0021246		2328.38	-0.00716088		2858.38	-0.00631511		3388.37	-0.00471698		3918.37	-0.00379657
208.6	-0.0004409		738.59	0.00531745		1268.59	-0.00022325		1798.59	0.00241445		2328.58	-0.00665059		2858.58	-0.00685134		3388.57	-0.0055262		3918.57	-0.0044094
208.8	-0.00026147		738.79	0.005558		1268.79	0.00000817		1798.79	0.00193297		2328.78	-0.00757023		2858.78	-0.0061097		3388.77	-0.00543951		3918.77	-0.00456035
209	-0.00036681		738.99	0.00497637		1268.99	-0.00012219		1798.99	0.0014641		2328.98	-0.00786704		2858.98	-0.00607939		3388.97	-0.00537437		3918.97	-0.00513027
209.2	0.00001655		739.19	0.00553908		1269.19	-0.00096281		1799.19	0.00034605		2329.18	-0.00750062		2859.18	-0.00536363		3389.17	-0.00552873		3919.17	-0.00494189
209.4	-0.00069201		739.39	0.00517077		1269.39	-0.00082144		1799.39	0.00085694		2329.38	-0.0075999		2859.38	-0.0046961		3389.37	-0.00601106		3919.37	-0.00650367
209.6	-0.00092916		739.59	0.00506782		1269.59	-0.00062131		1799.59	0.00110331		2329.58	-0.00671545		2859.58	-0.00426683		3389.57	-0.00671959		3919.57	-0.00720193
209.8	-0.00111283		739.79	0.00454468		1269.79	-0.00114303		1799.79	0.00043102		2329.78	-0.0057987		2859.78	-0.00378279		3389.77	-0.00679304		3919.77	-0.00687027
210	-0.00092263		739.99	0.00461861		1269.99	-0.00138365		1799.99	0.00093442		2329.98	-0.00603123		2859.98	-0.002986		3389.97	-0.00800017		3919.97	-0.00623631
210.2	0.00000068		740.19	0.00529959		1270.19	-0.00132094		1800.19	-0.00021698		2330.18	-0.00628317		2860.18	-0.0026075		3390.17	-0.00804129		3920.17	-0.00512154
210.4	-0.00086582		740.39	0.00598006		1270.39	-0.0007233		1800.39	-0.00104779		2330.38	-0.00544122		2860.38	-0.00295384		3390.37	-0.00836188		3920.37	-0.00460605
210.6	-0.00114278		740.59	0.00485318		1270.59	-0.00093299		1800.59	-0.00170959		2330.58	-0.00475018		2860.58	-0.00214601		3390.57	-0.0085661		3920.57	-0.00466418
210.8	-0.00201122		740.79	0.00576007		1270.79	-0.00072408		1800.79	-0.00152737		2330.78	-0.0052057		2860.78	-0.00234619		3390.77	-0.00813386		3920.77	-0.00338171
211	-0.00193016		740.99	0.00658166		1270.99	-0.0008396		1800.99	-0.00206527		2330.98	-0.00527914		2860.98	-0.00188682		3390.97	-0.0084958		3920.97	-0.00247695
211.2	-0.00252615		741.19	0.00722331		1271.19	-0.00100411		1801.19	-0.00228528		2331.18	-0.00564511		2861.18	-0.00270034		3391.17	-0.0081228		3921.17	-0.00124067
211.4	-0.00258473		741.39	0.00681837		1271.39	-0.00131739		1801.39	-0.00183307		2331.38	-0.00564149		2861.38	-0.00340253		3391.37	-0.00847777		3921.37	-0.0018079
211.6	-0.00269167		741.59	0.00675612		1271.59	-0.00144744		1801.59	-0.00174407		2331.58	-0.00618981		2861.58	-0.00356315		3391.57	-0.00896089		3921.57	-0.00079549
211.8	-0.00335907		741.79	0.00682217		1271.79	-0.00150846		1801.79	-0.0019056		2331.78	-0.00615826		2861.78	-0.00392023		3391.77	-0.00849167		3921.77	-0.00081886
212	-0.00339266		741.99	0.00775236		1271.99	-0.00163678		1801.99	-0.00147516		2331.98	-0.00579703		2861.98	-0.00402868		3391.97	-0.00843316		3921.97	0.00010764
212.2	-0.00297304		742.19	0.0083342		1272.19	-0.00052568		1802.19	-0.00216496		2332.18	-0.00552566		2862.18	-0.00434035		3392.17	-0.00734377		3922.17	-0.00083062
212.4	-0.00200015		742.39	0.00855979		1272.39	-0.001067		1802.39	-0.00195488		2332.38	-0.0058126		2862.38	-0.00493339		3392.37	-0.00696576		3922.37	-0.00094701
212.6	-0.00092601		742.59	0.00785662		1272.59	-0.00160357		1802.59	-0.00251686		2332.58	-0.0062629		2862.58	-0.0043776		3392.57	-0.00676993		3922.57	-0.00138364
212.8	-0.00063748		742.79	0.00850567		1272.79	-0.00150464		1802.79	-0.00306481		2332.78	-0.00707064		2862.78	-0.00444592		3392.77	-0.00649752		3922.77	-0.00237277
213	-0.00088907		742.99	0.00834321		1272.99	-0.00101347		1802.99	-0.00276149		2332.98	-0.00653054		2862.98	-0.00446772		3392.97	-0.00653291		3922.97	-0.00292321
213.2	-0.00016422		743.19	0.00806604		1273.19	-0.0007874		1803.19	-0.00162234		2333.18	-0.0074767		2863.18	-0.00392094		3393.17	-0.00570217		3923.17	-0.00368343
213.4	0.00003777		743.39	0.00712663		1273.39	-0.00031671		1803.39	-0.00074043		2333.38	-0.00798481		2863.38	-0.00345825		3393.37	-0.00550548		3923.37	-0.0050144
213.6	0.00065247		743.59	0.0070928		1273.59	0.00015773		1803.59	0.00030036		2333.58	-0.00799534		2863.58	-0.00304026		3393.57	-0.0049414		3923.57	-0.00530057
213.8	0.00118714		743.79	0.00697502		1273.79	0.00045373		1803.79	-0.00009099		2333.78	-0.0085397		2863.78	-0.00238806		3393.77	-0.00448947		3923.77	-0.00546038
214	0.00197185		743.99	0.00659512		1273.99	0.00031204		1803.99	-0.00040441		2333.98	-0.0084611		2863.98	-0.00267029		3393.97	-0.0043725		3923.97	-0.00571625
214.2	0.00208189		744.19	0.00654216		1274.19	-0.00001101		1804.19	-0.00035154		2334.18	-0.00811029		2864.18	-0.00306438		3394.17	-0.00350872		3924.17	-0.00616404
214.4	0.00198756		744.39	0.00598928		1274.39	-0.00018944		1804.39	-0.00079289		2334.38	-0.00798383		2864.38	-0.00346693		3394.37	-0.00341701		3924.37	-0.00657693
214.6	0.00140306		744.59	0.00566017		1274.59	0.00022659		1804.59	-0.00021797		2334.58	-0.00777408		2864.58	-0.00328162		3394.57	-0.00285094		3924.57	-0.00705817
214.8	0.00118062		744.79	0.0054042		1274.79	0.00031797		1804.79	-0.00050103		2334.78	-0.00791921		2864.78	-0.00399569		3394.77	-0.00254628		3924.77	-0.00671168
215	0.00058603		744.99	0.00489841		1274.99	0.00052403		1804.99	0.0000222		2334.98	-0.00716684		2864.98	-0.00405015		3394.97	-0.00348856		3924.97	-0.00632515
215.2	0.00049742		745.19	0.00467767		1275.19	0.00052452		1805.19	0.00090173		2335.18	-0.00656598		2865.18	-0.00522402		3395.17	-0.00410648		3925.17	-0.00552763
215.4	0.00026199		745.39	0.00435688		1275.39	0.00087203		1805.39	0.00126941		2335.38	-0.00574927		2865.38	-0.0049459		3395.37	-0.00445321		3925.37	-0.00648908
215.6	-0.00019186		745.59	0.0039825		1275.59	0.001093		1805.59	0.00139535		2335.58	-0.00538919		2865.58	-0.00516274		3395.57	-0.00519516		3925.57	-0.00639323
215.8	-0.00017461		745.79	0.00450962		1275.79	0.00071337		1805.79	0.00183918		2335.78	-0.00447488		2865.78	-0.00577734		3395.77	-0.00525926		3925.77	-0.00640648
216	-0.00013366		745.99	0.00458105		1275.99	0.00093234		1805.99	0.00246362		2335.98	-0.0030111		2865.98	-0.00626181		3395.97	-0.00570302		3925.97	-0.00615063
216.2	-0.00058933		746.19	0.00500645		1276.19	0.00148207		1806.19	0.00286907		2336.18	-0.00337453		2866.18	-0.00626687		3396.17	-0.00591111		3926.17	-0.00586495
216.4	-0.00109395		746.39	0.00563842		1276.39	0.00114608		1806.39	0.00420787		2336.38	-0.00358771		2866.38	-0.00604247		3396.37	-0.00721019		3926.37	-0.00460867
216.6	-0.00115721		746.59	0.00530542		1276.59	0.00051033		1806.59	0.00475877		2336.58	-0.0038782		2866.58	-0.00599422		3396.57	-0.0077389		3926.57	-0.00385232
216.8	-0.00141533		746.79	0.00606116		1276.79	0.00246868		1806.79	0.00556147		2336.78	-0.00452139		2866.78	-0.00600418		3396.77	-0.00842095		3926.77	-0.00350983
217	-0.00159228		746.99	0.00617949		1276.99	0.00333656		1806.99	0.00619109		2336.98	-0.00510533		2866.98	-0.00564294		3396.97	-0.00828894		3926.97	-0.00283962
217.2	-0.00129713		747.19	0.00593976		1277.19	0.00394693		1807.19	0.00638458		2337.18	-0.0066953		2867.18	-0.00575646		3397.17	-0.00800569		3927.17	-0.00332799
217.4	-0.00121241		747.39	0.00603894		1277.39	0.00384582		1807.39	0.00581536		2337.38	-0.00674412		2867.38	-0.00526409		3397.37	-0.00805616		3927.37	-0.00255897
217.6	-0.0013655		747.59	0.00634606		1277.59	0.00364236		1807.59	0.00573644		2337.58	-0.00719812		2867.58	-0.00460047		3397.57	-0.0074357		3927.57	-0.00235329
217.8	-0.00144663		747.79	0.00614734		1277.79	0.0030048		1807.79	0.00484313		2337.78	-0.00833523		2867.78	-0.00398584		3397.77	-0.00779803		3927.77	-0.00184806
218	-0.00160696		747.99	0.00585717		1277.99	0.00292724		1807.99	0.00448479		2337.98	-0.00860909		2867.98	-0.00404226		3397.97	-0.00713313		3927.97	-0.00107409
218.2	-0.00149523		748.19	0.0055499		1278.19	0.00335024		1808.19	0.00414648		2338.18	-0.00931812		2868.18	-0.00329048		3398.17	-0.00632813		3928.17	-0.00086178
218.4	-0.00178987		748.39	0.00474728		1278.39	0.00275901		1808.39	0.00331701		2338.38	-0.00924325		2868.38	-0.00287992		3398.37	-0.00568651		3928.37	-0.0003186
218.6	-0.00180766		748.59	0.00402975		1278.59	0.00321845		1808.59	0.00306287		2338.58	-0.00824741		2868.58	-0.0028669		3398.57	-0.00516093		3928.57	-0.00037081
218.8	-0.00148991		748.79	0.0033855		1278.79	0.00284777		1808.79	0.00172908		2338.78	-0.00692193		2868.78	-0.00293901		3398.77	-0.00504792		3928.77	-0.00006471
219	-0.00092281		748.99	0.00352363		1278.99	0.00288215		1808.99	0.00119534		2338.98	-0.00613537		2868.98	-0.00349113		3398.97	-0.00536284		3928.97	-0.00001913
219.2	-0.00069512		749.19	0.00421126		1279.19	0.00219486		1809.19	0.00086179		2339.18	-0.00525335		2869.18	-0.00412992		3399.17	-0.00593313		3929.17	-0.00027315
219.4	-0.00093875		749.39	0.00411932		1279.39	0.00238177		1809.39	0.00009304		2339.38	-0.00428311		2869.38	-0.00444192		3399.37	-0.00548179		3929.37	-0.00098208
219.6	-0.00135419		749.59	0.00366182		1279.59	0.00220718		1809.59	0.00014632		2339.58	-0.00410458		2869.58	-0.00584862		3399.57	-0.00587799		3929.57	-0.00140002
219.8	-0.0020036		749.79	0.0042211		1279.79	0.00167044		1809.79	0.00044132		2339.78	-0.00385401		2869.78	-0.00634904		3399.77	-0.00579929		3929.77	-0.00199465
220	-0.00212503		749.99	0.00516023		1279.99	0.00214377		1809.99	0.00151796		2339.98	-0.0035171		2869.98	-0.00667139		3399.97	-0.00612687		3929.97	-0.0022894
220.2	-0.00277018		750.19	0.00620146		1280.19	0.00171351		1810.19	0.00185562		2340.18	-0.00385436		2870.18	-0.00599111		3400.17	-0.00704441		3930.17	-0.00200798
220.4	-0.00411689		750.39	0.00691255		1280.39	0.00136581		1810.39	0.0027844		2340.38	-0.00324353		2870.38	-0.00595231		3400.37	-0.00658584		3930.37	-0.00194537
220.6	-0.00320324		750.59	0.00695452		1280.59	0.00092443		1810.59	0.00215901		2340.58	-0.00297529		2870.58	-0.0061279		3400.57	-0.00614001		3930.57	-0.00322182
220.8	-0.00312813		750.79	0.00686136		1280.79	0.00162005		1810.79	0.00186957		2340.78	-0.00281669		2870.78	-0.00579354		3400.77	-0.00616843		3930.77	-0.00369108
221	-0.00290848		750.99	0.00682631		1280.99	0.00210409		1810.99	0.00162727		2340.98	-0.00283337		2870.98	-0.00602963		3400.97	-0.00584048		3930.97	-0.00449028
221.2	-0.00323041		751.19	0.00719028		1281.19	0.00199299		1811.19	0.00078911		2341.18	-0.00342591		2871.18	-0.00585494		3401.17	-0.00589287		3931.17	-0.0041869
221.4	-0.00303329		751.39	0.00804202		1281.39	0.00097511		1811.39	0.0002691		2341.38	-0.0037463		2871.38	-0.00446475		3401.37	-0.00569282		3931.37	-0.00349078
221.6	-0.00391281		751.59	0.00817146		1281.59	0.00137243		1811.59	0.00098885		2341.58	-0.00440309		2871.58	-0.00287259		3401.57	-0.005308		3931.57	-0.0027462
221.8	-0.00400185		751.79	0.00768522		1281.79	0.00214582		1811.79	0.00071473		2341.78	-0.00528867		2871.78	-0.00184316		3401.77	-0.00620682		3931.77	-0.00166686
222	-0.00408896		751.99	0.00691463		1281.99	0.00281142		1811.99	-0.00046244		2341.98	-0.00532706		2871.98	-0.00093781		3401.97	-0.00502272		3931.97	-0.00126699
222.2	-0.00395051		752.19	0.00586737		1282.19	0.00317419		1812.19	-0.00019453		2342.18	-0.00607628		2872.18	-0.00023674		3402.17	-0.00450604		3932.17	-0.00079423
222.4	-0.00449125		752.39	0.00502061		1282.39	0.00245747		1812.39	-0.00042829		2342.38	-0.00631521		2872.38	-0.00053706		3402.37	-0.00419919		3932.37	0.00001319
222.6	-0.00349141		752.59	0.00486615		1282.59	0.00187633		1812.59	-0.00092814		2342.58	-0.00569783		2872.58	-0.00057237		3402.57	-0.00464691		3932.57	0.00089813
222.8	-0.00359851		752.79	0.004958		1282.79	0.00184691		1812.79	-0.00091598		2342.78	-0.0058286		2872.78	-0.0008776		3402.77	-0.004211		3932.77	0.00181291
223	-0.00325335		752.99	0.00524786		1282.99	0.00214826		1812.99	-0.00095459		2342.98	-0.00650157		2872.98	-0.00166502		3402.97	-0.00431491		3932.97	0.0017849
223.2	-0.00369811		753.19	0.00516969		1283.19	0.00319887		1813.19	-0.00004663		2343.18	-0.0057523		2873.18	-0.00183462		3403.17	-0.00460039		3933.17	0.00140236
223.4	-0.00358306		753.39	0.00441234		1283.39	0.00365735		1813.39	0.00025228		2343.38	-0.00558266		2873.38	-0.0019586		3403.37	-0.00365563		3933.37	0.0009171
223.6	-0.0029898		753.59	0.00456824		1283.59	0.00321851		1813.59	0.00126672		2343.58	-0.00501575		2873.58	-0.0024192		3403.57	-0.00381555		3933.57	-0.00013341
223.8	-0.00354304		753.79	0.00575082		1283.79	0.00341928		1813.79	0.00248821		2343.78	-0.0044419		2873.78	-0.00232945		3403.77	-0.00428449		3933.77	-0.00119287
224	-0.00353227		753.99	0.00643486		1283.99	0.00350806		1813.99	0.00339281		2343.98	-0.00393468		2873.98	-0.00186384		3403.97	-0.00456958		3933.97	-0.00166273
224.2	-0.00405807		754.19	0.00654156		1284.19	0.00291821		1814.19	0.003153		2344.18	-0.00333973		2874.18	-0.00273217		3404.17	-0.0041261		3934.17	-0.00213645
224.4	-0.00416638		754.39	0.00718123		1284.39	0.00302509		1814.39	0.00344932		2344.38	-0.00277743		2874.38	-0.00283343		3404.37	-0.00298007		3934.37	-0.00313955
224.6	-0.00260783		754.59	0.00697177		1284.59	0.00322039		1814.59	0.00378913		2344.58	-0.00219776		2874.58	-0.00332633		3404.57	-0.00268758		3934.57	-0.0048897
224.8	-0.00269603		754.79	0.00623309		1284.79	0.00271854		1814.79	0.00449143		2344.78	-0.00187965		2874.78	-0.00345448		3404.77	-0.00337217		3934.77	-0.0053307
225	-0.0026598		754.99	0.00712365		1284.99	0.00332306		1814.99	0.0056411		2344.98	-0.00199959		2874.98	-0.00347221		3404.97	-0.00264886		3934.97	-0.0059148
225.2	-0.00257597		755.19	0.00845108		1285.19	0.0033329		1815.19	0.00560195		2345.18	-0.00199058		2875.18	-0.00327198		3405.17	-0.00261493		3935.17	-0.00576399
225.4	-0.00240656		755.39	0.00876619		1285.39	0.00333601		1815.39	0.00624041		2345.38	-0.00186592		2875.38	-0.00211482		3405.37	-0.00243658		3935.37	-0.00570464
225.6	-0.00219224		755.59	0.00851916		1285.59	0.00475109		1815.59	0.00679079		2345.58	-0.0023239		2875.58	-0.00096696		3405.57	-0.00283619		3935.57	-0.00485062
225.8	-0.00137767		755.79	0.00813269		1285.79	0.00511096		1815.79	0.00624821		2345.78	-0.00280444		2875.78	-0.0009193		3405.77	-0.00336675		3935.77	-0.00469784
226	-0.00108584		755.99	0.0079009		1285.99	0.00435881		1815.99	0.00537066		2345.98	-0.00341531		2875.98	-0.0001853		3405.97	-0.00322177		3935.97	-0.00389493
226.2	-0.00001541		756.19	0.00757678		1286.19	0.00349851		1816.19	0.00635519		2346.18	-0.00350797		2876.18	-0.00021797		3406.17	-0.00382367		3936.17	-0.00299222
226.4	0.00061786		756.39	0.00799996		1286.39	0.00284428		1816.39	0.00629952		2346.38	-0.00306039		2876.38	-0.00131865		3406.37	-0.00377338		3936.37	-0.00104168
226.6	0.0009274		756.59	0.00831539		1286.59	0.00179357		1816.59	0.00579523		2346.58	-0.00233122		2876.58	-0.00057128		3406.57	-0.00430538		3936.57	0.00103026
226.8	0.00046474		756.79	0.00885364		1286.79	0.0028083		1816.79	0.00554503		2346.78	-0.00198057		2876.78	-0.00113152		3406.77	-0.00400932		3936.77	0.00192175
227	0.00035031		756.99	0.00857533		1286.99	0.00351236		1816.99	0.00444196		2346.98	-0.00090903		2876.98	-0.00152884		3406.97	-0.00434318		3936.97	0.00203632
227.2	0.00060547		757.19	0.00811243		1287.19	0.00349739		1817.19	0.00442149		2347.18	0.00019081		2877.18	-0.00168228		3407.17	-0.00487463		3937.17	0.00280852
227.4	0.00054242		757.39	0.00790154		1287.39	0.0031162		1817.39	0.00424545		2347.38	0.00015915		2877.38	-0.00191994		3407.37	-0.0048885		3937.37	0.00333038
227.6	0.00042333		757.59	0.00888392		1287.59	0.00354639		1817.59	0.00468407		2347.58	0.00098408		2877.58	-0.00204705		3407.57	-0.00552749		3937.57	0.00370673
227.8	-0.00102677		757.79	0.00927222		1287.79	0.00417343		1817.79	0.00508426		2347.78	0.00091158		2877.78	-0.00307208		3407.77	-0.00641934		3937.77	0.00389688
228	-0.00182619		757.99	0.00927369		1287.99	0.00461344		1817.99	0.00472521		2347.98	0.00126522		2877.98	-0.00320001		3407.97	-0.00632362		3937.97	0.00473311
228.2	-0.0021759		758.19	0.00968227		1288.19	0.00557302		1818.19	0.00401491		2348.18	0.00181256		2878.18	-0.00394962		3408.17	-0.00543528		3938.17	0.00502333
228.4	-0.00279287		758.39	0.01012423		1288.39	0.00608682		1818.39	0.00452129		2348.38	0.00160932		2878.38	-0.00351239		3408.37	-0.00479827		3938.37	0.00478713
228.6	-0.00247961		758.59	0.00958782		1288.59	0.00651701		1818.59	0.00449261		2348.58	0.00156691		2878.58	-0.00330102		3408.57	-0.00447163		3938.57	0.00388555
228.8	-0.00311731		758.79	0.0090607		1288.79	0.0070559		1818.79	0.00467254		2348.78	0.00092552		2878.78	-0.00334705		3408.77	-0.00473533		3938.77	0.003148
229	-0.00358458		758.99	0.00955458		1288.99	0.00769196		1818.99	0.00510176		2348.98	0.0003392		2878.98	-0.00256238		3408.97	-0.00415625		3938.97	0.00287125
229.2	-0.00234138		759.19	0.00906231		1289.19	0.00857649		1819.19	0.00491239		2349.18	-0.00020895		2879.18	-0.00130202		3409.17	-0.00449046		3939.17	0.00214455
229.4	-0.00172766		759.39	0.00846905		1289.39	0.00836151		1819.39	0.00509384		2349.38	-0.00119523		2879.38	-0.00020058		3409.37	-0.00468639		3939.37	0.00208573
229.6	-0.00130355		759.59	0.00834912		1289.59	0.0087149		1819.59	0.00557431		2349.58	-0.00308263		2879.58	0.00058175		3409.57	-0.00476338		3939.57	0.00160017
229.8	-0.00115591		759.79	0.00746166		1289.79	0.00814748		1819.79	0.00610522		2349.78	-0.00369697		2879.78	0.00078844		3409.77	-0.00475996		3939.77	0.00068871
230	-0.00062965		759.99	0.00695016		1289.99	0.00729366		1819.99	0.00566007		2349.98	-0.00463655		2879.98	0.00054831		3409.97	-0.00577763		3939.97	0.00024253
230.2	0.00014458		760.19	0.00572151		1290.19	0.00697626		1820.19	0.00571384		2350.18	-0.00452646		2880.18	0.00011039		3410.17	-0.0057343		3940.17	-0.00053723
230.4	0.00062468		760.39	0.0062042		1290.39	0.00637814		1820.39	0.0049459		2350.38	-0.00519949		2880.38	-0.00011186		3410.37	-0.00544325		3940.37	0.000641
230.6	-0.00004649		760.59	0.00645679		1290.59	0.00608774		1820.59	0.00404026		2350.58	-0.00506009		2880.58	0.00003656		3410.57	-0.00582938		3940.57	0.00146622
230.8	-0.00015305		760.79	0.00622551		1290.79	0.00626464		1820.79	0.00385465		2350.78	-0.00487263		2880.78	-0.00128118		3410.77	-0.00612569		3940.77	0.00116279
231	-0.00058445		760.99	0.0058932		1290.99	0.00555284		1820.99	0.00341289		2350.98	-0.00444673		2880.98	-0.00192765		3410.97	-0.00603943		3940.97	0.00081242
231.2	-0.00067318		761.19	0.00608949		1291.19	0.00505603		1821.19	0.00312461		2351.18	-0.00424239		2881.18	-0.00218322		3411.17	-0.0059989		3941.17	0.00115198
231.4	-0.00144148		761.39	0.00588364		1291.39	0.00539771		1821.39	0.00356101		2351.38	-0.00344521		2881.38	-0.00342916		3411.37	-0.00527106		3941.37	0.00188778
231.6	-0.00147766		761.59	0.00616403		1291.59	0.00503666		1821.59	0.00404061		2351.58	-0.00259454		2881.58	-0.00365569		3411.57	-0.00552251		3941.57	0.0021453
231.8	-0.00220613		761.79	0.00628805		1291.79	0.00432227		1821.79	0.00454484		2351.78	-0.00156559		2881.78	-0.0046924		3411.77	-0.00619305		3941.77	0.00339302
232	-0.00279042		761.99	0.00642586		1291.99	0.00477133		1821.99	0.00461617		2351.98	-0.00050626		2881.98	-0.00444043		3411.97	-0.00562334		3941.97	0.00396854
232.2	-0.00299717		762.19	0.00684614		1292.19	0.00534816		1822.19	0.00386651		2352.18	-0.00046389		2882.18	-0.00415326		3412.17	-0.00450576		3942.17	0.00382419
232.4	-0.00347125		762.39	0.00711998		1292.39	0.00458063		1822.39	0.00363441		2352.38	-0.00096794		2882.38	-0.00399389		3412.37	-0.00447868		3942.37	0.00434237
232.6	-0.00279158		762.59	0.00628538		1292.59	0.00532585		1822.59	0.00282683		2352.58	-0.0003463		2882.58	-0.00363123		3412.57	-0.00461153		3942.57	0.00445878
232.8	-0.00300387		762.79	0.00619964		1292.79	0.00538289		1822.79	0.00352364		2352.78	-0.00115429		2882.78	-0.00380131		3412.77	-0.00412164		3942.77	0.00470418
233	-0.00291436		762.99	0.00625017		1292.99	0.00510261		1822.99	0.0035653		2352.98	-0.00085344		2882.98	-0.00300867		3412.97	-0.0046171		3942.97	0.00427887
233.2	-0.00236574		763.19	0.00597209		1293.19	0.00591343		1823.19	0.00415573		2353.18	-0.00160542		2883.18	-0.00239305		3413.17	-0.00515225		3943.17	0.00379103
233.4	-0.00266876		763.39	0.00622023		1293.39	0.00565478		1823.39	0.00469836		2353.38	-0.00220847		2883.38	-0.00238575		3413.37	-0.0054535		3943.37	0.00348829
233.6	-0.00273021		763.59	0.00619191		1293.59	0.00626634		1823.59	0.00547815		2353.58	-0.00361063		2883.58	-0.00165923		3413.57	-0.00517172		3943.57	0.00333606
233.8	-0.00211432		763.79	0.00564842		1293.79	0.00638464		1823.79	0.00585108		2353.78	-0.00400018		2883.78	-0.00160466		3413.77	-0.00488356		3943.77	0.00328079
234	-0.00219642		763.99	0.00571884		1293.99	0.00716908		1823.99	0.00542962		2353.98	-0.00478972		2883.98	-0.00136047		3413.97	-0.0049343		3943.97	0.00363095
234.2	-0.00148911		764.19	0.00584215		1294.19	0.0069358		1824.19	0.00552164		2354.18	-0.00569106		2884.18	-0.00123795		3414.17	-0.00430404		3944.17	0.00430103
234.4	-0.00135866		764.39	0.00720535		1294.39	0.00741773		1824.39	0.00546222		2354.38	-0.00593129		2884.38	-0.00116421		3414.37	-0.00454963		3944.37	0.00499381
234.6	-0.00191439		764.59	0.00733656		1294.59	0.00756188		1824.59	0.00583431		2354.58	-0.00604406		2884.58	-0.00131725		3414.57	-0.00394867		3944.57	0.00582812
234.8	-0.00212091		764.79	0.0077898		1294.79	0.00716925		1824.79	0.00606882		2354.78	-0.00586578		2884.78	-0.00129936		3414.77	-0.00379084		3944.77	0.00547753
235	-0.00191338		764.99	0.00803661		1294.99	0.00607834		1824.99	0.00660134		2354.98	-0.00500794		2884.98	-0.00085		3414.97	-0.003312		3944.97	0.00576805
235.2	-0.00245101		765.19	0.00775351		1295.19	0.00690134		1825.19	0.00712685		2355.18	-0.00499021		2885.18	-0.00124013		3415.17	-0.00312376		3945.17	0.00597858
235.4	-0.00203567		765.39	0.00775181		1295.39	0.00652216		1825.39	0.00775333		2355.38	-0.0048573		2885.38	-0.00234361		3415.37	-0.00252643		3945.37	0.00611642
235.6	-0.00109783		765.59	0.00817045		1295.59	0.00584677		1825.59	0.00778989		2355.58	-0.0042644		2885.58	-0.00156554		3415.57	-0.0036586		3945.57	0.00540054
235.8	-0.00165821		765.79	0.00817607		1295.79	0.00603001		1825.79	0.00816908		2355.78	-0.00343811		2885.78	-0.00244259		3415.77	-0.00405946		3945.77	0.00587812
236	-0.00196139		765.99	0.00843948		1295.99	0.00670984		1825.99	0.00704426		2355.98	-0.00390925		2885.98	-0.00284066		3415.97	-0.00345453		3945.97	0.00401999
236.2	-0.00175197		766.19	0.00887873		1296.19	0.00664067		1826.19	0.00541237		2356.18	-0.00348611		2886.18	-0.00347352		3416.17	-0.0030371		3946.17	0.004193
236.4	-0.00118003		766.39	0.00842182		1296.39	0.00595575		1826.39	0.00503315		2356.38	-0.00362269		2886.38	-0.00333047		3416.37	-0.0027023		3946.37	0.00428333
236.6	-0.00082112		766.59	0.00681595		1296.59	0.00701585		1826.59	0.00485762		2356.58	-0.00355982		2886.58	-0.00377812		3416.57	-0.00239958		3946.57	0.00313498
236.8	-0.000705		766.79	0.00696012		1296.79	0.00709601		1826.79	0.00523875		2356.78	-0.00377323		2886.78	-0.00315887		3416.77	-0.00188479		3946.77	0.00211605
237	-0.00078278		766.99	0.00665963		1296.99	0.00786696		1826.99	0.00511821		2356.98	-0.0027717		2886.98	-0.00324		3416.97	-0.00203946		3946.97	0.00080091
237.2	-0.00122519		767.19	0.00701748		1297.19	0.00870583		1827.19	0.00510834		2357.18	-0.00342506		2887.18	-0.00273824		3417.17	-0.00215446		3947.17	0.00059092
237.4	-0.00138963		767.39	0.00724008		1297.39	0.00950174		1827.39	0.00464038		2357.38	-0.00361017		2887.38	-0.00335363		3417.37	-0.00224001		3947.37	0.00063361
237.6	-0.00096105		767.59	0.00661756		1297.59	0.00940072		1827.59	0.00454524		2357.58	-0.00343305		2887.58	-0.0031167		3417.57	-0.00246187		3947.57	0.00088341
237.8	-0.00137972		767.79	0.00667763		1297.79	0.00926917		1827.79	0.00402653		2357.78	-0.0025716		2887.78	-0.00352946		3417.77	-0.00281849		3947.77	0.00148385
238	-0.00053948		767.99	0.00706695		1297.99	0.00979954		1827.99	0.00398088		2357.98	-0.00251051		2887.98	-0.00334982		3417.97	-0.00364853		3947.97	0.00230456
238.2	-0.00084455		768.19	0.00716817		1298.19	0.00980117		1828.19	0.00502706		2358.18	-0.00212869		2888.18	-0.00338262		3418.17	-0.0043371		3948.17	0.00276041
238.4	-0.00081084		768.39	0.00675041		1298.39	0.00975735		1828.39	0.00625753		2358.38	-0.00128249		2888.38	-0.00271981		3418.37	-0.00458697		3948.37	0.00268171
238.6	-0.0010974		768.59	0.00678784		1298.59	0.00927621		1828.59	0.00669289		2358.58	-0.00069011		2888.58	-0.00199034		3418.57	-0.00479774		3948.57	0.00349186
238.8	-0.00136661		768.79	0.00687525		1298.79	0.00900518		1828.79	0.0067476		2358.78	0.00029201		2888.78	-0.00197479		3418.77	-0.00526787		3948.77	0.00340555
239	-0.00083197		768.99	0.00626534		1298.99	0.00876739		1828.99	0.00706592		2358.98	0.00042373		2888.98	-0.00238836		3418.97	-0.00517161		3948.97	0.00360187
239.2	-0.00123858		769.19	0.00713149		1299.19	0.00963545		1829.19	0.00760316		2359.18	0.000938		2889.18	-0.00251077		3419.17	-0.0050245		3949.17	0.0038537
239.4	0.00000088		769.39	0.0072136		1299.39	0.00831917		1829.39	0.00694579		2359.38	0.00153847		2889.38	-0.00330184		3419.37	-0.00518587		3949.37	0.00414309
239.6	-0.00004479		769.59	0.00767118		1299.59	0.00767829		1829.59	0.00784216		2359.58	0.00217416		2889.58	-0.00365814		3419.57	-0.00615155		3949.57	0.00451269
239.8	-0.0007947		769.79	0.00724829		1299.79	0.00838605		1829.79	0.00818764		2359.78	0.0017637		2889.78	-0.00513293		3419.77	-0.00576391		3949.77	0.004721
240	-0.00106266		769.99	0.00674763		1299.99	0.00785056		1829.99	0.00786008		2359.98	0.00088468		2889.98	-0.00538684		3419.97	-0.00490737		3949.97	0.00400615
240.2	-0.00041479		770.19	0.00672365		1300.19	0.00806328		1830.19	0.00754853		2360.18	0.00097064		2890.18	-0.00552843		3420.17	-0.00500196		3950.17	0.00429942
240.4	0.00050077		770.39	0.00630156		1300.39	0.0084772		1830.39	0.00801512		2360.38	-0.00050155		2890.38	-0.00518643		3420.37	-0.00393529		3950.37	0.00351368
240.6	0.0008777		770.59	0.00487856		1300.59	0.00948687		1830.59	0.00827915		2360.58	-0.00083376		2890.58	-0.00453887		3420.57	-0.00367667		3950.57	0.00285476
240.8	0.00014538		770.79	0.00487593		1300.79	0.00958923		1830.79	0.00782796		2360.78	-0.0008501		2890.78	-0.00392196		3420.77	-0.00368862		3950.77	0.00291143
241	0.00010206		770.99	0.00466921		1300.99	0.00982885		1830.99	0.00701145		2360.98	-0.00187847		2890.98	-0.00347216		3420.97	-0.00454633		3950.97	0.00275568
241.2	0.00001149		771.19	0.00490495		1301.19	0.00981016		1831.19	0.00615209		2361.18	-0.0031121		2891.18	-0.00349981		3421.17	-0.00544667		3951.17	0.00306634
241.4	-0.0001861		771.39	0.00491919		1301.39	0.01054452		1831.39	0.00484965		2361.38	-0.00317649		2891.38	-0.00358061		3421.37	-0.00602697		3951.37	0.00331865
241.6	-0.00052635		771.59	0.00515746		1301.59	0.01038066		1831.59	0.00390012		2361.58	-0.00268172		2891.58	-0.00311116		3421.57	-0.00638831		3951.57	0.00373246
241.8	-0.00079589		771.79	0.00505345		1301.79	0.01078034		1831.79	0.00375562		2361.78	-0.00248647		2891.78	-0.0028198		3421.77	-0.00579532		3951.77	0.00396955
242	0.00066625		771.99	0.00493561		1301.99	0.01145192		1831.99	0.00522895		2361.98	-0.0030389		2891.98	-0.00294343		3421.97	-0.00578984		3951.97	0.00510942
242.2	-0.00016085		772.19	0.00404692		1302.19	0.01155077		1832.19	0.0054498		2362.18	-0.00263606		2892.18	-0.00182782		3422.17	-0.00554395		3952.17	0.00585333
242.4	0.00033702		772.39	0.00426196		1302.39	0.01045001		1832.39	0.00565746		2362.38	-0.00224632		2892.38	-0.00123834		3422.37	-0.00547402		3952.37	0.00622495
242.6	0.00073599		772.59	0.00466257		1302.59	0.01071594		1832.59	0.0051031		2362.58	-0.00124437		2892.58	-0.00097037		3422.57	-0.00515624		3952.57	0.00652547
242.8	0.0004495		772.79	0.00432542		1302.79	0.01014321		1832.79	0.00535329		2362.78	-0.00036952		2892.78	-0.00088755		3422.77	-0.00468316		3952.77	0.00680682
243	0.0003818		772.99	0.00439109		1302.99	0.01012446		1832.99	0.00600147		2362.98	-0.00054122		2892.98	-0.00195703		3422.97	-0.00386565		3952.97	0.00712459
243.2	-0.00011127		773.19	0.0051272		1303.19	0.0095641		1833.19	0.00719956		2363.18	-0.00036672		2893.18	-0.00182916		3423.17	-0.00465654		3953.17	0.00738404
243.4	-0.00098787		773.39	0.00586442		1303.39	0.00875861		1833.39	0.00830796		2363.38	-0.00106855		2893.38	-0.0021349		3423.37	-0.00483979		3953.37	0.00697606
243.6	-0.00091591		773.59	0.00677393		1303.59	0.00864213		1833.59	0.00932147		2363.58	-0.00088755		2893.58	-0.00189969		3423.57	-0.00534425		3953.57	0.00637562
243.8	-0.00127192		773.79	0.00658858		1303.79	0.00914074		1833.79	0.00975162		2363.78	-0.00113283		2893.78	-0.00191776		3423.77	-0.00518592		3953.77	0.00511639
244	-0.00098907		773.99	0.00698856		1303.99	0.00888945		1833.99	0.00995708		2363.98	-0.00169371		2893.98	-0.0014344		3423.97	-0.00465811		3953.97	0.00383368
244.2	-0.00055418		774.19	0.00773787		1304.19	0.00962903		1834.19	0.01060554		2364.18	-0.00278897		2894.18	-0.00177927		3424.17	-0.00440541		3954.17	0.00269772
244.4	-0.00035469		774.39	0.0076045		1304.39	0.01005982		1834.39	0.01128777		2364.38	-0.00234896		2894.38	-0.00201259		3424.37	-0.00405473		3954.37	0.00224643
244.6	-0.00016886		774.59	0.00782515		1304.59	0.01056781		1834.59	0.0108055		2364.58	-0.00221536		2894.58	-0.00123957		3424.57	-0.00432127		3954.57	0.00166562
244.8	-0.00100923		774.79	0.00747408		1304.79	0.01059523		1834.79	0.01046637		2364.78	-0.00240447		2894.78	-0.00107284		3424.77	-0.00504038		3954.77	0.00134448
245	0.00033856		774.99	0.00792377		1304.99	0.01078111		1834.99	0.01052647		2364.98	-0.00313109		2894.98	0.00005177		3424.97	-0.00485284		3954.97	0.00140735
245.2	0.00007354		775.19	0.00828607		1305.19	0.01113079		1835.19	0.00998644		2365.18	-0.00317025		2895.18	-0.00045608		3425.17	-0.00437314		3955.17	0.00209108
245.4	-0.00096859		775.39	0.00827011		1305.39	0.01166223		1835.39	0.00910821		2365.38	-0.00308562		2895.38	-0.0004306		3425.37	-0.00420198		3955.37	0.00274367
245.6	-0.0005699		775.59	0.00812569		1305.59	0.01151985		1835.59	0.00859511		2365.58	-0.00363729		2895.58	-0.00050707		3425.57	-0.00371989		3955.57	0.0034042
245.8	0.00026868		775.79	0.00758983		1305.79	0.01172271		1835.79	0.00873025		2365.78	-0.00383942		2895.78	-0.00031674		3425.77	-0.00403654		3955.77	0.00364443
246	0.00173928		775.99	0.00748055		1305.99	0.01147746		1835.99	0.00817688		2365.98	-0.00386773		2895.98	-0.00003722		3425.97	-0.0039885		3955.97	0.00528101
246.2	0.00197906		776.19	0.00722129		1306.19	0.01065064		1836.19	0.00738877		2366.18	-0.0027265		2896.18	0.00096318		3426.17	-0.00421145		3956.17	0.00529972
246.4	0.00221554		776.39	0.0075717		1306.39	0.00948129		1836.39	0.00770741		2366.38	-0.00169465		2896.38	0.00113855		3426.37	-0.00376513		3956.37	0.00528533
246.6	0.00305041		776.59	0.00684476		1306.59	0.00980166		1836.59	0.00761009		2366.58	-0.00092677		2896.58	0.00100892		3426.57	-0.00367396		3956.57	0.00568932
246.8	0.0018959		776.79	0.00642059		1306.79	0.00974951		1836.79	0.00830415		2366.78	-0.00013992		2896.78	0.00110692		3426.77	-0.00407285		3956.77	0.00638853
247	0.00065721		776.99	0.00683129		1306.99	0.00990757		1836.99	0.00822259		2366.98	-0.00060586		2896.98	0.00038958		3426.97	-0.00378667		3956.97	0.00690161
247.2	-0.0002126		777.19	0.00797966		1307.19	0.00919772		1837.19	0.00811344		2367.18	-0.00069654		2897.18	0.00170287		3427.17	-0.00458979		3957.17	0.00709974
247.4	-0.00051635		777.39	0.00882521		1307.39	0.0083949		1837.39	0.00846961		2367.38	0.00008016		2897.38	0.00200996		3427.37	-0.00462309		3957.37	0.00664121
247.6	-0.00018212		777.59	0.00832625		1307.59	0.00820841		1837.59	0.00809249		2367.58	0.00102459		2897.58	0.00179997		3427.57	-0.00492341		3957.57	0.00608799
247.8	-0.00038279		777.79	0.00859681		1307.79	0.00829848		1837.79	0.00818308		2367.78	0.00124434		2897.78	0.002631		3427.77	-0.00486621		3957.77	0.00521919
248	0.00020225		777.99	0.00874526		1307.99	0.00919186		1837.99	0.00806167		2367.98	0.00192188		2897.98	0.00299127		3427.97	-0.00416277		3957.97	0.00481611
248.2	-0.00046543		778.19	0.00803927		1308.19	0.00971833		1838.19	0.00823889		2368.18	0.00237723		2898.18	0.00227356		3428.17	-0.00390327		3958.17	0.00486238
248.4	-0.00029196		778.39	0.0084006		1308.39	0.01027779		1838.39	0.00795467		2368.38	0.00328368		2898.38	0.00228119		3428.37	-0.00407397		3958.37	0.00451002
248.6	-0.00079468		778.59	0.00874808		1308.59	0.01039876		1838.59	0.00720716		2368.58	0.00271806		2898.58	0.0023783		3428.57	-0.00429951		3958.57	0.00398897
248.8	-0.00115067		778.79	0.00857788		1308.79	0.01063326		1838.79	0.00790848		2368.78	0.00194251		2898.78	0.00171051		3428.77	-0.00390878		3958.77	0.00411799
249	0.00005855		778.99	0.00867463		1308.99	0.01063784		1838.99	0.00810218		2368.98	0.00107389		2898.98	0.00104511		3428.97	-0.00388848		3958.97	0.00423014
249.2	-0.00030788		779.19	0.00840273		1309.19	0.0107146		1839.19	0.00787359		2369.18	0.00026438		2899.18	0.00031929		3429.17	-0.00414667		3959.17	0.00506263
249.4	-0.00014781		779.39	0.00869555		1309.39	0.01075214		1839.39	0.00766992		2369.38	-0.00106931		2899.38	0.00034949		3429.37	-0.00420955		3959.37	0.0049966
249.6	0.00120236		779.59	0.00912114		1309.59	0.01053546		1839.59	0.0072277		2369.58	-0.00128061		2899.58	-0.00023401		3429.57	-0.00447039		3959.57	0.00511422
249.8	0.0018422		779.79	0.00919677		1309.79	0.01062552		1839.79	0.00753597		2369.78	-0.00208162		2899.78	0.00016899		3429.77	-0.00516577		3959.77	0.00532806
250	0.00254594		779.99	0.00840257		1309.99	0.01066447		1839.99	0.00712348		2369.98	-0.00219893		2899.98	0.00029883		3429.97	-0.00485044		3959.97	0.00574432
250.2	0.00268391		780.19	0.00799267		1310.19	0.01013332		1840.19	0.00769306		2370.18	-0.0020637		2900.18	0.00003695		3430.17	-0.00447575		3960.17	0.00610854
250.4	0.00265066		780.39	0.00712178		1310.39	0.01007182		1840.39	0.00815497		2370.38	-0.00194406		2900.38	0.00045934		3430.37	-0.00405485		3960.37	0.00719925
250.6	0.00177276		780.59	0.00659161		1310.59	0.00928857		1840.59	0.008819		2370.58	-0.00255491		2900.58	0.00084131		3430.57	-0.0042047		3960.57	0.00847096
250.8	0.00056936		780.79	0.00690595		1310.79	0.00933533		1840.79	0.00920369		2370.78	-0.00204837		2900.78	0.00017014		3430.77	-0.00357628		3960.77	0.00844945
251	-0.00060317		780.99	0.00660876		1310.99	0.00864135		1840.99	0.00915489		2370.98	-0.00176048		2900.98	-0.00024571		3430.97	-0.00312443		3960.97	0.00925068
251.2	-0.00079415		781.19	0.00696488		1311.19	0.00781224		1841.19	0.0099787		2371.18	-0.00069632		2901.18	0.00039243		3431.17	-0.00297385		3961.17	0.00937214
251.4	-0.00029228		781.39	0.00682021		1311.39	0.00734521		1841.39	0.01076452		2371.38	0.00050314		2901.38	-0.00022013		3431.37	-0.00280649		3961.37	0.00928033
251.6	-0.0005338		781.59	0.00601421		1311.59	0.00750105		1841.59	0.01112268		2371.58	0.00130103		2901.58	-0.00030875		3431.57	-0.00221493		3961.57	0.00905238
251.8	-0.00001413		781.79	0.00640572		1311.79	0.0087181		1841.79	0.01038242		2371.78	0.00106893		2901.78	0.00076612		3431.77	-0.00166991		3961.77	0.0090005
252	0.0000038		781.99	0.00620022		1311.99	0.00934333		1841.99	0.00943087		2371.98	0.00137107		2901.98	0.00029293		3431.97	-0.00148823		3961.97	0.00860054
252.2	-0.0013304		782.19	0.00635049		1312.19	0.00961995		1842.19	0.00960227		2372.18	0.00059947		2902.18	-0.00054568		3432.17	-0.00176537		3962.17	0.00875092
252.4	-0.00115578		782.39	0.00724162		1312.39	0.01031391		1842.39	0.01029909		2372.38	0.00006722		2902.38	-0.00126088		3432.37	-0.0022666		3962.37	0.00828548
252.6	-0.00172337		782.59	0.00807017		1312.59	0.01026778		1842.59	0.01011618		2372.58	-0.00064518		2902.58	-0.00227967		3432.57	-0.00329276		3962.57	0.0081554
252.8	-0.0011987		782.79	0.00899199		1312.79	0.01056193		1842.79	0.01123483		2372.78	-0.00082668		2902.78	-0.00290674		3432.77	-0.0033811		3962.77	0.00823668
253	-0.00024242		782.99	0.00857821		1312.99	0.01035526		1842.99	0.01126542		2372.98	-0.00090242		2902.98	-0.00306003		3432.97	-0.00448739		3962.97	0.0078357
253.2	-0.00063229		783.19	0.00968459		1313.19	0.01074866		1843.19	0.01129149		2373.18	-0.00156862		2903.18	-0.00299039		3433.17	-0.004147		3963.17	0.00822972
253.4	-0.00083332		783.39	0.01010189		1313.39	0.01062118		1843.39	0.01038394		2373.38	-0.002535		2903.38	-0.00252986		3433.37	-0.00438495		3963.37	0.00790873
253.6	-0.00038365		783.59	0.0103175		1313.59	0.0102035		1843.59	0.00963184		2373.58	-0.00165283		2903.58	-0.00248351		3433.57	-0.00499625		3963.57	0.00812685
253.8	-0.00069377		783.79	0.00961816		1313.79	0.00999194		1843.79	0.00897757		2373.78	-0.00285829		2903.78	-0.00081413		3433.77	-0.00509432		3963.77	0.00897342
254	-0.0004423		783.99	0.00860691		1313.99	0.0103925		1843.99	0.00824597		2373.98	-0.00201006		2903.98	-0.00062429		3433.97	-0.00526629		3963.97	0.00955732
254.2	-0.00056729		784.19	0.00838156		1314.19	0.00923754		1844.19	0.00822068		2374.18	-0.00222204		2904.18	0.0002154		3434.17	-0.00456715		3964.17	0.01009025
254.4	-0.00111151		784.39	0.00778504		1314.39	0.00900069		1844.39	0.00776967		2374.38	-0.00190168		2904.38	0.00073279		3434.37	-0.005173		3964.37	0.00982142
254.6	-0.0020101		784.59	0.00760109		1314.59	0.00802664		1844.59	0.00778371		2374.58	-0.00141966		2904.58	0.00155948		3434.57	-0.00491719		3964.57	0.00964461
254.8	-0.00185131		784.79	0.00734926		1314.79	0.00879692		1844.79	0.00741313		2374.78	0.00038563		2904.78	0.00140206		3434.77	-0.00433132		3964.77	0.00932652
255	-0.00193055		784.99	0.00698151		1314.99	0.00779104		1844.99	0.00774946		2374.98	0.00153697		2904.98	0.0014874		3434.97	-0.00410551		3964.97	0.00941168
255.2	-0.00131868		785.19	0.0065762		1315.19	0.00721645		1845.19	0.00688939		2375.18	0.00223511		2905.18	0.00173356		3435.17	-0.00347898		3965.17	0.00897192
255.4	-0.00146285		785.39	0.0062507		1315.39	0.0068426		1845.39	0.00596505		2375.38	0.00244805		2905.38	0.00154629		3435.37	-0.00312107		3965.37	0.00858173
255.6	-0.00118989		785.59	0.00572404		1315.59	0.00688757		1845.59	0.00524652		2375.58	0.00230088		2905.58	0.0013228		3435.57	-0.00283073		3965.57	0.0078717
255.8	-0.00092978		785.79	0.00722203		1315.79	0.00763691		1845.79	0.00387177		2375.78	0.00092473		2905.78	0.00209016		3435.77	-0.0028138		3965.77	0.00810819
256	-0.00212437		785.99	0.00828416		1315.99	0.00733839		1845.99	0.00431112		2375.98	0.00051187		2905.98	0.00239595		3435.97	-0.00390519		3965.97	0.00733366
256.2	-0.0025477		786.19	0.00927363		1316.19	0.00876227		1846.19	0.00449179		2376.18	-0.00003454		2906.18	0.00226327		3436.17	-0.00408492		3966.17	0.0073629
256.4	-0.00205594		786.39	0.00974053		1316.39	0.00949128		1846.39	0.00475766		2376.38	-0.00062765		2906.38	0.00172997		3436.37	-0.00506285		3966.37	0.00757331
256.6	-0.00305475		786.59	0.01068514		1316.59	0.00969313		1846.59	0.00472948		2376.58	-0.00115863		2906.58	0.00267251		3436.57	-0.00474328		3966.57	0.00729904
256.8	-0.00306926		786.79	0.01137433		1316.79	0.009839		1846.79	0.0053289		2376.78	-0.00078379		2906.78	0.00312224		3436.77	-0.00499196		3966.77	0.0067608
257	-0.0031571		786.99	0.01104519		1316.99	0.01027113		1846.99	0.00495333		2376.98	-0.00126406		2906.98	0.00381122		3436.97	-0.00546571		3966.97	0.00679374
257.2	-0.00369509		787.19	0.01121718		1317.19	0.01059253		1847.19	0.00516578		2377.18	-0.00221591		2907.18	0.00454653		3437.17	-0.00519607		3967.17	0.00764856
257.4	-0.00393477		787.39	0.01048959		1317.39	0.01011808		1847.39	0.00589745		2377.38	-0.00253823		2907.38	0.00497393		3437.37	-0.00581154		3967.37	0.00841911
257.6	-0.00357953		787.59	0.00983301		1317.59	0.00920753		1847.59	0.00692488		2377.58	-0.00259364		2907.58	0.00466963		3437.57	-0.00663799		3967.57	0.0094254
257.8	-0.0027785		787.79	0.00933402		1317.79	0.00993193		1847.79	0.00857438		2377.78	-0.00218125		2907.78	0.00444916		3437.77	-0.00710729		3967.77	0.00984293
258	-0.00227916		787.99	0.00836416		1317.99	0.01026505		1847.99	0.00952848		2377.98	-0.00155354		2907.98	0.00371209		3437.97	-0.00758304		3967.97	0.01033813
258.2	-0.00270568		788.19	0.0080705		1318.19	0.01074464		1848.19	0.01005632		2378.18	-0.00231282		2908.18	0.00330142		3438.17	-0.00743615		3968.17	0.01064533
258.4	-0.002649		788.39	0.00744598		1318.39	0.01225142		1848.39	0.01043713		2378.38	-0.00145661		2908.38	0.00298403		3438.37	-0.00762442		3968.37	0.01109726
258.6	-0.00289356		788.59	0.00715739		1318.59	0.01187593		1848.59	0.01156596		2378.58	-0.00040635		2908.58	0.00359588		3438.57	-0.00737661		3968.57	0.01185454
258.8	-0.0026284		788.79	0.00641833		1318.79	0.01227248		1848.79	0.01175366		2378.78	0.00078719		2908.78	0.00245873		3438.77	-0.00665262		3968.77	0.01166669
259	-0.00200068		788.99	0.00657598		1318.99	0.01149379		1848.99	0.01154074		2378.98	0.00111356		2908.98	0.00119972		3438.97	-0.00653601		3968.97	0.01150919
259.2	-0.0023485		789.19	0.00643547		1319.19	0.01138287		1849.19	0.0116251		2379.18	0.00143618		2909.18	0.00065125		3439.17	-0.0061983		3969.17	0.01181094
259.4	-0.00235674		789.39	0.00793394		1319.39	0.01189759		1849.39	0.01189331		2379.38	0.00173364		2909.38	0.00017317		3439.37	-0.00646409		3969.37	0.01167528
259.6	-0.00210085		789.59	0.008587		1319.59	0.01271241		1849.59	0.01154928		2379.58	0.00155352		2909.58	-0.0003837		3439.57	-0.00462622		3969.57	0.01203516
259.8	-0.00268065		789.79	0.00947802		1319.79	0.01309775		1849.79	0.01070025		2379.78	0.00099199		2909.78	-0.00023784		3439.77	-0.00350542		3969.77	0.01240093
260	-0.0035708		789.99	0.0100787		1319.99	0.01437806		1849.99	0.01123571		2379.98	0.0003905		2909.98	0.00100954		3439.97	-0.00337821		3969.97	0.01155105
260.2	-0.00217181		790.19	0.01008127		1320.19	0.01533012		1850.19	0.00935842		2380.18	0.00055717		2910.18	0.00044895		3440.17	-0.00227549		3970.17	0.01174628
260.4	-0.00151211		790.39	0.01028711		1320.39	0.01498282		1850.39	0.00855327		2380.38	0.00047505		2910.38	0.00053768		3440.37	-0.00166089		3970.37	0.01188046
260.6	-0.00139538		790.59	0.01066786		1320.59	0.01479882		1850.59	0.00720216		2380.58	0.00092351		2910.58	0.00232284		3440.57	-0.00087813		3970.57	0.01175374
260.8	-0.00128302		790.79	0.01073117		1320.79	0.01367145		1850.79	0.0065472		2380.78	0.0005337		2910.78	0.00314291		3440.77	-0.00161171		3970.77	0.0126877
261	-0.00078511		790.99	0.01041025		1320.99	0.0139988		1850.99	0.00631913		2380.98	-0.00028028		2910.98	0.00416775		3440.97	-0.00164153		3970.97	0.0138119
261.2	-0.00017387		791.19	0.00988906		1321.19	0.01341987		1851.19	0.0076236		2381.18	-0.00099952		2911.18	0.0048804		3441.17	-0.00248318		3971.17	0.01418769
261.4	0.00089347		791.39	0.00891375		1321.39	0.01235659		1851.39	0.00807103		2381.38	-0.00142472		2911.38	0.00486159		3441.37	-0.00245734		3971.37	0.01407542
261.6	0.00165303		791.59	0.00799495		1321.59	0.01219022		1851.59	0.00869536		2381.58	-0.00203473		2911.58	0.00557625		3441.57	-0.00346526		3971.57	0.01350169
261.8	0.00175594		791.79	0.00854986		1321.79	0.01286978		1851.79	0.00866171		2381.78	-0.00218878		2911.78	0.00558877		3441.77	-0.00481706		3971.77	0.01309997
262	0.00078645		791.99	0.00787454		1321.99	0.01269665		1851.99	0.00825022		2381.98	-0.00252297		2911.98	0.00606867		3441.97	-0.00546647		3971.97	0.0133785
262.2	0.0004771		792.19	0.00787062		1322.19	0.01300243		1852.19	0.00766645		2382.18	-0.00269021		2912.18	0.00566291		3442.17	-0.00590209		3972.17	0.01359622
262.4	-0.00066098		792.39	0.00765705		1322.39	0.01297148		1852.39	0.00779364		2382.38	-0.00175878		2912.38	0.00573622		3442.37	-0.00648507		3972.37	0.01394279
262.6	-0.00145892		792.59	0.00761019		1322.59	0.01142967		1852.59	0.00835229		2382.58	-0.00203935		2912.58	0.00542316		3442.57	-0.00733268		3972.57	0.01343838
262.8	-0.00176748		792.79	0.00707332		1322.79	0.0117143		1852.79	0.00909821		2382.78	-0.00107708		2912.78	0.00416642		3442.77	-0.00751018		3972.77	0.01280791
263	-0.00135047		792.99	0.00762335		1322.99	0.01188412		1852.99	0.00961991		2382.98	-0.00103832		2912.98	0.00297926		3442.97	-0.00844937		3972.97	0.0122526
263.2	-0.00275651		793.19	0.00790451		1323.19	0.01187367		1853.19	0.00975992		2383.18	-0.00179186		2913.18	0.00152802		3443.17	-0.00820625		3973.17	0.01237252
263.4	-0.00325102		793.39	0.00826146		1323.39	0.01140511		1853.39	0.00889995		2383.38	-0.0021388		2913.38	0.00059038		3443.37	-0.00801658		3973.37	0.01194769
263.6	-0.00411186		793.59	0.00786639		1323.59	0.0114551		1853.59	0.00968542		2383.58	-0.00272555		2913.58	-0.00078383		3443.57	-0.00627591		3973.57	0.01162199
263.8	-0.00459614		793.79	0.00855653		1323.79	0.01147707		1853.79	0.00930779		2383.78	-0.00315656		2913.78	-0.00143901		3443.77	-0.00646669		3973.77	0.01070029
264	-0.00459385		793.99	0.00949054		1323.99	0.01253793		1853.99	0.00936032		2383.98	-0.00300067		2913.98	-0.00191311		3443.97	-0.00554808		3973.97	0.00992838
264.2	-0.00453927		794.19	0.01081667		1324.19	0.01249091		1854.19	0.0085425		2384.18	-0.00277586		2914.18	-0.00269713		3444.17	-0.00447733		3974.17	0.00980297
264.4	-0.00426992		794.39	0.01212372		1324.39	0.01252474		1854.39	0.0086251		2384.38	-0.00286456		2914.38	-0.00230199		3444.37	-0.00364983		3974.37	0.01020673
264.6	-0.00530838		794.59	0.01237885		1324.59	0.01311934		1854.59	0.00897421		2384.58	-0.00287789		2914.58	-0.00160863		3444.57	-0.00386957		3974.57	0.01133071
264.8	-0.00616385		794.79	0.01228518		1324.79	0.01271682		1854.79	0.01050279		2384.78	-0.00358188		2914.78	-0.0016982		3444.77	-0.00346954		3974.77	0.01204326
265	-0.00503967		794.99	0.01242116		1324.99	0.01368143		1854.99	0.01199726		2384.98	-0.00392317		2914.98	-0.00141064		3444.97	-0.00308927		3974.97	0.0121478
265.2	-0.00401003		795.19	0.01152327		1325.19	0.01348513		1855.19	0.01317019		2385.18	-0.00333042		2915.18	-0.00103981		3445.17	-0.00263827		3975.17	0.0119177
265.4	-0.00271397		795.39	0.01142373		1325.39	0.01343986		1855.39	0.01353167		2385.38	-0.00340401		2915.38	-0.00056204		3445.37	-0.00200748		3975.37	0.01236061
265.6	-0.00338945		795.59	0.01157037		1325.59	0.01440158		1855.59	0.01378852		2385.58	-0.00312632		2915.58	0.00051912		3445.57	-0.00286626		3975.57	0.01277662
265.8	-0.00325333		795.79	0.01240671		1325.79	0.01440151		1855.79	0.01285594		2385.78	-0.00270844		2915.78	0.00063847		3445.77	-0.00368705		3975.77	0.01364965
266	-0.00327998		795.99	0.0119108		1325.99	0.01485948		1855.99	0.01331696		2385.98	-0.00096507		2915.98	0.00113509		3445.97	-0.00342351		3975.97	0.0138493
266.2	-0.00292595		796.19	0.01163162		1326.19	0.01449352		1856.19	0.01264526		2386.18	-0.00035671		2916.18	0.00157047		3446.17	-0.00312573		3976.17	0.01429259
266.4	-0.00392126		796.39	0.01111584		1326.39	0.01463351		1856.39	0.01325558		2386.38	0.00049569		2916.38	0.00248883		3446.37	-0.00328664		3976.37	0.01447494
266.6	-0.00314532		796.59	0.0105227		1326.59	0.01475116		1856.59	0.01331906		2386.58	0.00052193		2916.58	0.00318013		3446.57	-0.00375884		3976.57	0.01458817
266.8	-0.00297204		796.79	0.00998523		1326.79	0.01442995		1856.79	0.01336973		2386.78	0.00164766		2916.78	0.0027732		3446.77	-0.00427814		3976.77	0.01426097
267	-0.00236773		796.99	0.00965714		1326.99	0.01461681		1856.99	0.01224365		2386.98	0.00089837		2916.98	0.00272979		3446.97	-0.00489355		3976.97	0.01343197
267.2	-0.00295408		797.19	0.00918896		1327.19	0.01403198		1857.19	0.01174766		2387.18	0.00021639		2917.18	0.00282725		3447.17	-0.00465757		3977.17	0.01423799
267.4	-0.00355595		797.39	0.00867189		1327.39	0.01337706		1857.39	0.01170665		2387.38	0.00073116		2917.38	0.00330399		3447.37	-0.00539055		3977.37	0.01355863
267.6	-0.00381411		797.59	0.00860374		1327.59	0.01383351		1857.59	0.01258892		2387.58	0.00076373		2917.58	0.00289359		3447.57	-0.0052011		3977.57	0.01336623
267.8	-0.00341277		797.79	0.0095231		1327.79	0.01465563		1857.79	0.01217233		2387.78	0.0004055		2917.78	0.00384171		3447.77	-0.00490595		3977.77	0.01392569
268	-0.00325032		797.99	0.00921565		1327.99	0.01502928		1857.99	0.01239032		2387.98	0.00052866		2917.98	0.00376588		3447.97	-0.00406067		3977.97	0.01324254
268.2	-0.00331934		798.19	0.01033467		1328.19	0.01554325		1858.19	0.01267491		2388.18	0.0000482		2918.18	0.00418717		3448.17	-0.00421576		3978.17	0.01311836
268.4	-0.0026012		798.39	0.00990168		1328.39	0.01560245		1858.39	0.01289633		2388.38	0.00008616		2918.38	0.00371315		3448.37	-0.00455922		3978.37	0.01403994
268.6	-0.00299955		798.59	0.0096183		1328.59	0.01579645		1858.59	0.01361117		2388.58	-0.00019972		2918.58	0.0039351		3448.57	-0.00511859		3978.57	0.01416462
268.8	-0.00189044		798.79	0.00912938		1328.79	0.01582241		1858.79	0.01454454		2388.78	-0.00020253		2918.78	0.00338766		3448.77	-0.00436567		3978.77	0.01365478
269	-0.00097896		798.99	0.00955507		1328.99	0.01594531		1858.99	0.01509868		2388.98	-0.00020707		2918.98	0.00397795		3448.97	-0.00387572		3978.97	0.01363314
269.2	-0.00060236		799.19	0.00990725		1329.19	0.01536837		1859.19	0.01479932		2389.18	-0.0000851		2919.18	0.00366512		3449.17	-0.0037355		3979.17	0.01389742
269.4	-0.00077682		799.39	0.01025294		1329.39	0.01568137		1859.39	0.01526109		2389.38	-0.00069235		2919.38	0.00327497		3449.37	-0.00361248		3979.37	0.01481121
269.6	-0.00216362		799.59	0.01040512		1329.59	0.01621666		1859.59	0.01475883		2389.58	-0.0011091		2919.58	0.00328298		3449.57	-0.0044831		3979.57	0.01396508
269.8	-0.00182796		799.79	0.01110344		1329.79	0.01574922		1859.79	0.01450328		2389.78	-0.0007185		2919.78	0.00281206		3449.77	-0.00376103		3979.77	0.01378193
270	-0.00224027		799.99	0.01047307		1329.99	0.01582158		1859.99	0.01433427		2389.98	0.00029504		2919.98	0.0024002		3449.97	-0.00364465		3979.97	0.01383661
270.2	-0.00262517		800.19	0.0106803		1330.19	0.01550207		1860.19	0.01357348		2390.18	0.00013092		2920.18	0.00238839		3450.17	-0.00381344		3980.17	0.0137087
270.4	-0.00354951		800.39	0.01042931		1330.39	0.01481943		1860.39	0.01325927		2390.38	-0.00022357		2920.38	0.00170399		3450.37	-0.00372197		3980.37	0.01390489
270.6	-0.00309826		800.59	0.00994931		1330.59	0.01411017		1860.59	0.01288279		2390.58	-0.00005511		2920.58	0.0017709		3450.57	-0.0040203		3980.57	0.01386565
270.8	-0.00338866		800.79	0.00944585		1330.79	0.01366076		1860.79	0.01217568		2390.78	0.00033095		2920.78	0.00104218		3450.77	-0.00361529		3980.77	0.01297432
271	-0.0036633		800.99	0.0098989		1330.99	0.01402278		1860.99	0.01162371		2390.98	0.00066559		2920.98	0.00109105		3450.97	-0.0035278		3980.97	0.01283603
271.2	-0.00451652		801.19	0.00999824		1331.19	0.01418447		1861.19	0.01112502		2391.18	0.00042286		2921.18	0.00115509		3451.17	-0.00357664		3981.17	0.0128655
271.4	-0.00536252		801.39	0.00982993		1331.39	0.01370521		1861.39	0.01130718		2391.38	0.00066736		2921.38	0.00085811		3451.37	-0.00439072		3981.37	0.0125694
271.6	-0.00497636		801.59	0.01022087		1331.59	0.01366252		1861.59	0.01198327		2391.58	0.00105189		2921.58	0.00009802		3451.57	-0.00422432		3981.57	0.01311698
271.8	-0.0037571		801.79	0.01114943		1331.79	0.01361902		1861.79	0.01211562		2391.78	0.00024078		2921.78	0.00127415		3451.77	-0.00400245		3981.77	0.01313699
272	-0.00391616		801.99	0.0109886		1331.99	0.012979		1861.99	0.01164691		2391.98	-0.00041294		2921.98	0.00066653		3451.97	-0.00493109		3981.97	0.0124942
272.2	-0.00347555		802.19	0.01174659		1332.19	0.01303977		1862.19	0.01071623		2392.18	-0.00044954		2922.18	0.00074421		3452.17	-0.00489456		3982.17	0.01321116
272.4	-0.00361495		802.39	0.0116693		1332.39	0.01350454		1862.39	0.01092243		2392.38	-0.00039904		2922.38	0.00157489		3452.37	-0.00481988		3982.37	0.01325948
272.6	-0.00295993		802.59	0.0116668		1332.59	0.01352102		1862.59	0.01121635		2392.58	-0.00094426		2922.58	0.00256599		3452.57	-0.00485895		3982.57	0.01262877
272.8	-0.00267901		802.79	0.01186911		1332.79	0.01387476		1862.79	0.01117244		2392.78	-0.00128909		2922.78	0.00333463		3452.77	-0.00473957		3982.77	0.01276523
273	-0.00233579		802.99	0.01198043		1332.99	0.0135117		1862.99	0.01100563		2392.98	-0.00204226		2922.98	0.00403031		3452.97	-0.00428482		3982.97	0.01301754
273.2	-0.0017955		803.19	0.01186397		1333.19	0.01331198		1863.19	0.01117283		2393.18	-0.00205242		2923.18	0.00455915		3453.17	-0.00476407		3983.17	0.0128364
273.4	-0.00180334		803.39	0.01121787		1333.39	0.01387132		1863.39	0.0120581		2393.38	-0.00261791		2923.38	0.00498932		3453.37	-0.00494847		3983.37	0.0130346
273.6	-0.00183091		803.59	0.01085961		1333.59	0.01411411		1863.59	0.01226961		2393.58	-0.0028945		2923.58	0.00617445		3453.57	-0.00525053		3983.57	0.01224748
273.8	-0.00166813		803.79	0.01042263		1333.79	0.01337512		1863.79	0.01193397		2393.78	-0.00225112		2923.78	0.00620307		3453.77	-0.00476953		3983.77	0.0128131
274	-0.00150971		803.99	0.00904673		1333.99	0.01381353		1863.99	0.01194625		2393.98	-0.00145556		2923.98	0.00629805		3453.97	-0.00563414		3983.97	0.01340037
274.2	-0.00218992		804.19	0.00898695		1334.19	0.01352159		1864.19	0.01210074		2394.18	-0.00181824		2924.18	0.0069492		3454.17	-0.00588259		3984.17	0.0136435
274.4	-0.00197317		804.39	0.00851967		1334.39	0.01379961		1864.39	0.01180339		2394.38	-0.00159091		2924.38	0.00756257		3454.37	-0.00500344		3984.37	0.01416179
274.6	-0.00220161		804.59	0.00879439		1334.59	0.01440579		1864.59	0.01261042		2394.58	-0.00079424		2924.58	0.0082298		3454.57	-0.00514584		3984.57	0.01410818
274.8	-0.00319546		804.79	0.0091301		1334.79	0.01553627		1864.79	0.01262478		2394.78	-0.0013636		2924.78	0.00714459		3454.77	-0.00454283		3984.77	0.01336871
275	-0.00460874		804.99	0.01002525		1334.99	0.01614636		1864.99	0.01299413		2394.98	-0.00114758		2924.98	0.0067241		3454.97	-0.0054845		3984.97	0.01376042
275.2	-0.00517723		805.19	0.00998518		1335.19	0.01595317		1865.19	0.01292842		2395.18	-0.00126599		2925.18	0.00650873		3455.17	-0.00593594		3985.17	0.01363297
275.4	-0.00547027		805.39	0.01038008		1335.39	0.015395		1865.39	0.01380444		2395.38	-0.00059023		2925.38	0.00565091		3455.37	-0.00621192		3985.37	0.01449575
275.6	-0.00515548		805.59	0.0113409		1335.59	0.01551527		1865.59	0.01365645		2395.58	0.00016955		2925.58	0.00443373		3455.57	-0.00657336		3985.57	0.01476341
275.8	-0.00566418		805.79	0.01197864		1335.79	0.01527729		1865.79	0.01309302		2395.78	-0.00108024		2925.78	0.00433795		3455.77	-0.00620273		3985.77	0.01494456
276	-0.00677681		805.99	0.0118145		1335.99	0.01552002		1865.99	0.01217074		2395.98	-0.00165775		2925.98	0.0033237		3455.97	-0.00582359		3985.97	0.01514685
276.2	-0.00623373		806.19	0.01259087		1336.19	0.01532118		1866.19	0.01175414		2396.18	-0.00111076		2926.18	0.00285296		3456.17	-0.0039531		3986.17	0.01479338
276.4	-0.0070461		806.39	0.01262613		1336.39	0.01574509		1866.39	0.01196635		2396.38	-0.00082666		2926.38	0.00216139		3456.37	-0.00305403		3986.37	0.01472468
276.6	-0.00601739		806.59	0.01295801		1336.59	0.01569314		1866.59	0.01110293		2396.58	-0.00101127		2926.58	0.00152627		3456.57	-0.0028038		3986.57	0.01423353
276.8	-0.00523404		806.79	0.01302003		1336.79	0.01506657		1866.79	0.01094224		2396.78	-0.000593		2926.78	0.00124246		3456.77	-0.00212773		3986.77	0.0132355
277	-0.00385223		806.99	0.01209472		1336.99	0.01395412		1866.99	0.01048059		2396.98	0.00022253		2926.98	0.00145352		3456.97	-0.00141085		3986.97	0.01275479
277.2	-0.00400209		807.19	0.01108825		1337.19	0.01329376		1867.19	0.01029437		2397.18	0.00026189		2927.18	0.00246244		3457.17	-0.00147945		3987.17	0.01305168
277.4	-0.00348225		807.39	0.01060568		1337.39	0.01323032		1867.39	0.01028312		2397.38	-0.00050095		2927.38	0.00201369		3457.37	-0.00121648		3987.37	0.01292287
277.6	-0.003289		807.59	0.00971564		1337.59	0.01217263		1867.59	0.01079855		2397.58	-0.00027328		2927.58	0.00236335		3457.57	-0.00083781		3987.57	0.0123799
277.8	-0.0029527		807.79	0.01000123		1337.79	0.01234663		1867.79	0.01055986		2397.78	0.00043722		2927.78	0.0022244		3457.77	-0.00123394		3987.77	0.01257446
278	-0.00265474		807.99	0.01004342		1337.99	0.01308402		1867.99	0.01016067		2397.98	-0.0001064		2927.98	0.00319135		3457.97	-0.00121707		3987.97	0.01300393
278.2	-0.00322863		808.19	0.00987721		1338.19	0.01269806		1868.19	0.01046319		2398.18	-0.00070916		2928.18	0.00415304		3458.17	-0.00145254		3988.17	0.01343348
278.4	-0.00236772		808.39	0.01003669		1338.39	0.01288589		1868.39	0.01054576		2398.38	-0.00118176		2928.38	0.00502627		3458.37	-0.00211307		3988.37	0.0137074
278.6	-0.00283085		808.59	0.00986661		1338.59	0.01245186		1868.59	0.01126059		2398.58	-0.00162893		2928.58	0.00547383		3458.57	-0.00303586		3988.57	0.01416125
278.8	-0.00348823		808.79	0.00953569		1338.79	0.01193154		1868.79	0.01108917		2398.78	-0.00185587		2928.78	0.00472795		3458.77	-0.00301061		3988.77	0.01469614
279	-0.0033498		808.99	0.00928846		1338.99	0.01176644		1868.99	0.01070458		2398.98	-0.00177722		2928.98	0.00511522		3458.97	-0.00390578		3988.97	0.01537485
279.2	-0.0026755		809.19	0.00914697		1339.19	0.01126894		1869.19	0.0109271		2399.18	-0.00189772		2929.18	0.00526108		3459.17	-0.00414929		3989.17	0.01493171
279.4	-0.00300529		809.39	0.00968877		1339.39	0.01163896		1869.39	0.01159018		2399.38	-0.00252221		2929.38	0.00502149		3459.37	-0.00408384		3989.37	0.01572546
279.6	-0.00267996		809.59	0.01009745		1339.59	0.01248629		1869.59	0.01216597		2399.58	-0.00287173		2929.58	0.00453785		3459.57	-0.00443412		3989.57	0.01560136
279.8	-0.00329308		809.79	0.00973963		1339.79	0.01312095		1869.79	0.0125638		2399.78	-0.00325496		2929.78	0.00568167		3459.77	-0.0039482		3989.77	0.01554586
280	-0.00283278		809.99	0.00947092		1339.99	0.01336223		1869.99	0.01303049		2399.98	-0.0029173		2929.98	0.00561159		3459.97	-0.00410961		3989.97	0.01567937
280.2	-0.00180012		810.19	0.01051168		1340.19	0.01408009		1870.19	0.01354592		2400.18	-0.00265704		2930.18	0.00536428		3460.17	-0.00347654		3990.17	0.01460166
280.4	-0.00256481		810.39	0.01016273		1340.39	0.01505194		1870.39	0.0139187		2400.38	-0.00235651		2930.38	0.00486133		3460.37	-0.00349396		3990.37	0.01448247
280.6	-0.00174193		810.59	0.01073244		1340.59	0.01496688		1870.59	0.01382948		2400.58	-0.00237746		2930.58	0.00467435		3460.57	-0.00369681		3990.57	0.01384923
280.8	-0.00188372		810.79	0.01090773		1340.79	0.01408787		1870.79	0.01384734		2400.78	-0.00242027		2930.78	0.00493416		3460.77	-0.00362441		3990.77	0.0140404
281	-0.00206246		810.99	0.01085731		1340.99	0.01388487		1870.99	0.01342962		2400.98	-0.00266083		2930.98	0.00593498		3460.97	-0.0030197		3990.97	0.01428265
281.2	-0.00307999		811.19	0.01127175		1341.19	0.01380651		1871.19	0.0132608		2401.18	-0.00293062		2931.18	0.00588693		3461.17	-0.00385239		3991.17	0.013666
281.4	-0.00238914		811.39	0.01187242		1341.39	0.01387238		1871.39	0.0135081		2401.38	-0.00264545		2931.38	0.00592171		3461.37	-0.0038502		3991.37	0.01288407
281.6	-0.00271155		811.59	0.01170215		1341.59	0.01379677		1871.59	0.01457776		2401.58	-0.00216378		2931.58	0.00583052		3461.57	-0.00418513		3991.57	0.01338523
281.8	-0.00296902		811.79	0.01278967		1341.79	0.01492975		1871.79	0.01340973		2401.78	-0.00163887		2931.78	0.00652723		3461.77	-0.00456836		3991.77	0.01399074
282	-0.00357534		811.99	0.01246107		1341.99	0.01438108		1871.99	0.01302818		2401.98	-0.00190611		2931.98	0.00680444		3461.97	-0.00497496		3991.97	0.01379914
282.2	-0.0041158		812.19	0.01126449		1342.19	0.0137808		1872.19	0.0133047		2402.18	-0.00141331		2932.18	0.00649191		3462.17	-0.00548326		3992.17	0.01412781
282.4	-0.00298633		812.39	0.01194354		1342.39	0.01334114		1872.39	0.01231069		2402.38	-0.00190342		2932.38	0.00618477		3462.37	-0.00592252		3992.37	0.01413455
282.6	-0.00395831		812.59	0.01149596		1342.59	0.01282951		1872.59	0.01192178		2402.58	-0.00195359		2932.58	0.00534095		3462.57	-0.00519374		3992.57	0.01475653
282.8	-0.00375139		812.79	0.01165704		1342.79	0.01204611		1872.79	0.01191038		2402.78	-0.00174429		2932.78	0.00448465		3462.77	-0.00460177		3992.77	0.01456689
283	-0.00323628		812.99	0.01073489		1342.99	0.01258008		1872.99	0.01171865		2402.98	-0.0021413		2932.98	0.00483048		3462.97	-0.00453666		3992.97	0.01421954
283.2	-0.00322829		813.19	0.01014855		1343.19	0.01240498		1873.19	0.01160269		2403.18	-0.00170893		2933.18	0.00480157		3463.17	-0.00417202		3993.17	0.01408067
283.4	-0.00347618		813.39	0.00978936		1343.39	0.01216633		1873.39	0.01166318		2403.38	-0.00157277		2933.38	0.00413145		3463.37	-0.00412104		3993.37	0.01517567
283.6	-0.00272666		813.59	0.00959469		1343.59	0.01241563		1873.59	0.01181482		2403.58	-0.00124417		2933.58	0.00407444		3463.57	-0.00398506		3993.57	0.01516114
283.8	-0.0024419		813.79	0.00907952		1343.79	0.01228361		1873.79	0.01149996		2403.78	-0.00061967		2933.78	0.00489396		3463.77	-0.00410546		3993.77	0.01505086
284	-0.00182901		813.99	0.0086666		1343.99	0.0120011		1873.99	0.0121074		2403.98	-0.00064374		2933.98	0.00334639		3463.97	-0.00380782		3993.97	0.0154999
284.2	-0.00254732		814.19	0.00911712		1344.19	0.0132092		1874.19	0.01238815		2404.18	-0.00048691		2934.18	0.00296735		3464.17	-0.00344982		3994.17	0.01473041
284.4	-0.00370196		814.39	0.00896037		1344.39	0.01278538		1874.39	0.0130955		2404.38	-0.00062737		2934.38	0.00302197		3464.37	-0.00320821		3994.37	0.01598443
284.6	-0.00358201		814.59	0.00857306		1344.59	0.01340306		1874.59	0.01261229		2404.58	-0.00037115		2934.58	0.00361222		3464.57	-0.0030517		3994.57	0.01585704
284.8	-0.00478889		814.79	0.0085953		1344.79	0.01360291		1874.79	0.01187955		2404.78	-0.00067405		2934.78	0.00484489		3464.77	-0.00247829		3994.77	0.01557116
285	-0.00492716		814.99	0.0078348		1344.99	0.01382691		1874.99	0.01217453		2404.98	-0.00084689		2934.98	0.00562435		3464.97	-0.00216291		3994.97	0.0150574
285.2	-0.00555266		815.19	0.00786416		1345.19	0.01365784		1875.19	0.01210064		2405.18	-0.00072687		2935.18	0.00612818		3465.17	-0.00299117		3995.17	0.01475965
285.4	-0.00484097		815.39	0.00791751		1345.39	0.01426939		1875.39	0.01197326		2405.38	-0.0000398		2935.38	0.00656159		3465.37	-0.00293203		3995.37	0.01472179
285.6	-0.00535782		815.59	0.00737887		1345.59	0.01548809		1875.59	0.01226108		2405.58	0.00054218		2935.58	0.00702304		3465.57	-0.003545		3995.57	0.01478813
285.8	-0.0063991		815.79	0.00754267		1345.79	0.01535937		1875.79	0.01118693		2405.78	0.00106931		2935.78	0.00800095		3465.77	-0.0034099		3995.77	0.01398841
286	-0.00638932		815.99	0.00685851		1345.99	0.01576939		1875.99	0.01209878		2405.98	0.000295		2935.98	0.00799828		3465.97	-0.0036698		3995.97	0.01369616
286.2	-0.00696079		816.19	0.00675088		1346.19	0.01601122		1876.19	0.01200029		2406.18	0.00003095		2936.18	0.00799401		3466.17	-0.00389373		3996.17	0.01385292
286.4	-0.00570762		816.39	0.00794835		1346.39	0.01652589		1876.39	0.01195282		2406.38	-0.00017718		2936.38	0.00745412		3466.37	-0.00403797		3996.37	0.0137472
286.6	-0.00593265		816.59	0.00789781		1346.59	0.016681		1876.59	0.01246565		2406.58	0.00063568		2936.58	0.00742861		3466.57	-0.00395226		3996.57	0.01470127
286.8	-0.00550745		816.79	0.00872315		1346.79	0.01610994		1876.79	0.01273162		2406.78	0.00156802		2936.78	0.00763993		3466.77	-0.00383529		3996.77	0.01440459
287	-0.00525419		816.99	0.00880297		1346.99	0.01588691		1876.99	0.01298905		2406.98	0.00182465		2936.98	0.00629815		3466.97	-0.00347604		3996.97	0.0142217
287.2	-0.00472745		817.19	0.00927253		1347.19	0.01569665		1877.19	0.01223786		2407.18	0.00190534		2937.18	0.00485682		3467.17	-0.00331573		3997.17	0.01476661
287.4	-0.00370481		817.39	0.01020292		1347.39	0.01528212		1877.39	0.01279378		2407.38	0.00229393		2937.38	0.00371096		3467.37	-0.00300223		3997.37	0.01506697
287.6	-0.00284435		817.59	0.01027129		1347.59	0.01440383		1877.59	0.01291229		2407.58	0.0021606		2937.58	0.00361063		3467.57	-0.00243807		3997.57	0.0150922
287.8	-0.00201647		817.79	0.00984351		1347.79	0.01356527		1877.79	0.01298251		2407.78	0.00213053		2937.78	0.00368744		3467.77	-0.00223921		3997.77	0.01561023
288	-0.00135361		817.99	0.009562		1347.99	0.01350681		1877.99	0.01370638		2407.98	0.00267176		2937.98	0.00319882		3467.97	-0.00162808		3997.97	0.01573096
288.2	-0.00165744		818.19	0.00991694		1348.19	0.01399349		1878.19	0.01382978		2408.18	0.00329891		2938.18	0.00292101		3468.17	-0.00149135		3998.17	0.01618896
288.4	-0.0016713		818.39	0.01005497		1348.39	0.0133865		1878.39	0.01378146		2408.38	0.00230539		2938.38	0.00347397		3468.37	-0.00061771		3998.37	0.0165804
288.6	-0.0004467		818.59	0.00887127		1348.59	0.01394553		1878.59	0.01323869		2408.58	0.00263418		2938.58	0.00410518		3468.57	-0.00031539		3998.57	0.01635349
288.8	-0.00034512		818.79	0.00925027		1348.79	0.01349077		1878.79	0.01330941		2408.78	0.00203576		2938.78	0.00432287		3468.77	0.00065948		3998.77	0.01723887
289	0.00006375		818.99	0.00837053		1348.99	0.01364725		1878.99	0.01363101		2408.98	0.00176915		2938.98	0.00441171		3468.97	0.00077651		3998.97	0.01822255
289.2	0.00009636		819.19	0.00837775		1349.19	0.01368842		1879.19	0.01368976		2409.18	0.00168063		2939.18	0.00481689		3469.17	-0.00053138		3999.17	0.01829719
289.4	0.00097377		819.39	0.00809842		1349.39	0.01450997		1879.39	0.01333921		2409.38	0.00269725		2939.38	0.00533009		3469.37	-0.00173737		3999.37	0.0179939
289.6	-0.00011746		819.59	0.00734523		1349.59	0.01471797		1879.59	0.01410744		2409.58	0.00267806		2939.58	0.00628382		3469.57	-0.00180383		3999.57	0.01827774
289.8	-0.00075431		819.79	0.00694668		1349.79	0.01436004		1879.79	0.01459862		2409.78	0.00253944		2939.78	0.00618449		3469.77	-0.00286275		3999.77	0.01906743
290	-0.00125633		819.99	0.00728949		1349.99	0.01518845		1879.99	0.01460106		2409.98	0.00195355		2939.98	0.00571491		3469.97	-0.00376707		3999.97	0.01948143
290.2	-0.00184331		820.19	0.00758708		1350.19	0.01493636		1880.19	0.01396604		2410.18	0.00148277		2940.18	0.00552817		3470.17	-0.00435292		4000.17	0.01972925
290.4	-0.00188314		820.39	0.00825699		1350.39	0.01521392		1880.39	0.01447218		2410.38	0.00118953		2940.38	0.00494003		3470.37	-0.0047308		4000.37	0.02027709
290.6	-0.00313535		820.59	0.00916032		1350.59	0.0150934		1880.59	0.01510883		2410.58	0.00075818		2940.58	0.00505388		3470.57	-0.0047886		4000.57	0.02058819
290.8	-0.00376787		820.79	0.00983493		1350.79	0.01469919		1880.79	0.01520574		2410.78	0.00063579		2940.78	0.00447819		3470.77	-0.00407837		4000.77	0.01951238
291	-0.00362546		820.99	0.00935827		1350.99	0.01493544		1880.99	0.01507656		2410.98	-0.00067001		2940.98	0.00354105		3470.97	-0.00411151		4000.97	0.01914098
291.2	-0.00378875		821.19	0.00920746		1351.19	0.01543148		1881.19	0.01417486		2411.18	-0.00161394		2941.18	0.00395026		3471.17	-0.00354201		4001.17	0.0188373
291.4	-0.00413489		821.39	0.00888222		1351.39	0.01455261		1881.39	0.01376771		2411.38	-0.00218469		2941.38	0.004558		3471.37	-0.00279793		4001.37	0.01765686
291.6	-0.00376801		821.59	0.00768045		1351.59	0.01373873		1881.59	0.01352214		2411.58	-0.00194826		2941.58	0.00471479		3471.57	-0.00221952		4001.57	0.01792823
291.8	-0.00356051		821.79	0.00750679		1351.79	0.01387304		1881.79	0.01365068		2411.78	-0.00203036		2941.78	0.00518702		3471.77	-0.00153411		4001.77	0.01766556
292	-0.00375024		821.99	0.00817592		1351.99	0.01465406		1881.99	0.01421939		2411.98	-0.00154567		2941.98	0.00563925		3471.97	-0.00033106		4001.97	0.01640081
292.2	-0.00391789		822.19	0.00887751		1352.19	0.01521159		1882.19	0.01408238		2412.18	-0.00221111		2942.18	0.00487318		3472.17	0.00005364		4002.17	0.01670596
292.4	-0.00421756		822.39	0.00846289		1352.39	0.01550895		1882.39	0.01467648		2412.38	-0.00249211		2942.38	0.00503295		3472.37	0.00023644		4002.37	0.0160174
292.6	-0.00326243		822.59	0.0073693		1352.59	0.01626295		1882.59	0.01445006		2412.58	-0.00184731		2942.58	0.00514538		3472.57	0.00035001		4002.57	0.01668819
292.8	-0.00296886		822.79	0.00754591		1352.79	0.01684314		1882.79	0.01502715		2412.78	-0.00151038		2942.78	0.00468745		3472.77	0.00074404		4002.77	0.01634034
293	-0.00339398		822.99	0.00623604		1352.99	0.01724367		1882.99	0.01484601		2412.98	-0.00086559		2942.98	0.00506245		3472.97	0.00038693		4002.97	0.01627934
293.2	-0.00308945		823.19	0.00557487		1353.19	0.0170595		1883.19	0.01510996		2413.18	0.00018918		2943.18	0.00544069		3473.17	-0.00041718		4003.17	0.01621118
293.4	-0.00317635		823.39	0.00560315		1353.39	0.01720884		1883.39	0.01492124		2413.38	0.00186404		2943.38	0.00597406		3473.37	-0.00077066		4003.37	0.01588178
293.6	-0.00363254		823.59	0.0047625		1353.59	0.01561177		1883.59	0.01591622		2413.58	0.00287908		2943.58	0.00599817		3473.57	-0.00132929		4003.57	0.01663083
293.8	-0.00353806		823.79	0.00503428		1353.79	0.01622872		1883.79	0.01570148		2413.78	0.00406135		2943.78	0.00620002		3473.77	-0.00258016		4003.77	0.0167767
294	-0.00292439		823.99	0.00567319		1353.99	0.01623788		1883.99	0.01597809		2413.98	0.00395025		2943.98	0.0060927		3473.97	-0.00261376		4003.97	0.0172916
294.2	-0.00284361		824.19	0.00569131		1354.19	0.01648126		1884.19	0.01644096		2414.18	0.00392295		2944.18	0.0064151		3474.17	-0.00254329		4004.17	0.0182647
294.4	-0.00306725		824.39	0.0062482		1354.39	0.01642197		1884.39	0.01731833		2414.38	0.00404129		2944.38	0.00656101		3474.37	-0.00218411		4004.37	0.01883258
294.6	-0.00322609		824.59	0.00686346		1354.59	0.0170299		1884.59	0.01804257		2414.58	0.00298263		2944.58	0.00653789		3474.57	-0.00293023		4004.57	0.01890378
294.8	-0.00350155		824.79	0.00701887		1354.79	0.01623835		1884.79	0.01742877		2414.78	0.00203912		2944.78	0.00580651		3474.77	-0.00259862		4004.77	0.01884541
295	-0.00335634		824.99	0.00717555		1354.99	0.01635344		1884.99	0.01749762		2414.98	0.0009449		2944.98	0.00624673		3474.97	-0.00316253		4004.97	0.01897515
295.2	-0.00356922		825.19	0.00871139		1355.19	0.01690463		1885.19	0.01740992		2415.18	0.00090168		2945.18	0.00620831		3475.17	-0.00176944		4005.17	0.01847347
295.4	-0.0038257		825.39	0.00899479		1355.39	0.01655009		1885.39	0.01713179		2415.38	0.0006719		2945.38	0.00586533		3475.37	-0.00186241		4005.37	0.01792109
295.6	-0.00294747		825.59	0.00938919		1355.59	0.01683443		1885.59	0.01835428		2415.58	0.0011548		2945.58	0.00540953		3475.57	-0.00128988		4005.57	0.01861211
295.8	-0.00357596		825.79	0.01016786		1355.79	0.01796468		1885.79	0.01883542		2415.78	0.00026791		2945.78	0.0057994		3475.77	-0.00063584		4005.77	0.0184114
296	-0.00387419		825.99	0.01119378		1355.99	0.0183351		1885.99	0.0193174		2415.98	0.00043755		2945.98	0.0049372		3475.97	0.00009089		4005.97	0.01813561
296.2	-0.00381036		826.19	0.01181334		1356.19	0.01813713		1886.19	0.0193467		2416.18	-0.00035727		2946.18	0.00413294		3476.17	-0.0004038		4006.17	0.01849097
296.4	-0.00304145		826.39	0.01127315		1356.39	0.01870265		1886.39	0.01967835		2416.38	-0.00017096		2946.38	0.00376411		3476.37	-0.000751		4006.37	0.01851847
296.6	-0.00228024		826.59	0.01127337		1356.59	0.01854755		1886.59	0.01892529		2416.58	-0.00014847		2946.58	0.00452703		3476.57	-0.00096235		4006.57	0.01895795
296.8	-0.00214071		826.79	0.01154622		1356.79	0.01799357		1886.79	0.0188737		2416.78	0.00024188		2946.78	0.0048432		3476.77	-0.00111264		4006.77	0.01831586
297	-0.00281831		826.99	0.01092521		1356.99	0.01807661		1886.99	0.01798523		2416.98	0.00103105		2946.98	0.00496803		3476.97	-0.00087907		4006.97	0.01834298
297.2	-0.00241799		827.19	0.01043072		1357.19	0.01699849		1887.19	0.01817023		2417.18	0.00208334		2947.18	0.00547296		3477.17	-0.00116832		4007.17	0.01872849
297.4	-0.00290161		827.39	0.00964584		1357.39	0.01686403		1887.39	0.01747971		2417.38	0.00322568		2947.38	0.00597546		3477.37	-0.00247506		4007.37	0.01932049
297.6	-0.00214109		827.59	0.0086191		1357.59	0.01619152		1887.59	0.01793399		2417.58	0.00305254		2947.58	0.00554739		3477.57	-0.00323389		4007.57	0.01984466
297.8	-0.00246425		827.79	0.00911579		1357.79	0.01739778		1887.79	0.01790077		2417.78	0.00356573		2947.78	0.00603146		3477.77	-0.00400532		4007.77	0.02040665
298	-0.00171098		827.99	0.00827968		1357.99	0.01711729		1887.99	0.01856315		2417.98	0.00315942		2947.98	0.00624154		3477.97	-0.00399291		4007.97	0.02134121
298.2	-0.00286108		828.19	0.0073473		1358.19	0.01806019		1888.19	0.0185961		2418.18	0.00348455		2948.18	0.00647657		3478.17	-0.0029178		4008.17	0.02121531
298.4	-0.00332153		828.39	0.00749137		1358.39	0.01818029		1888.39	0.01869864		2418.38	0.00262712		2948.38	0.00646035		3478.37	-0.00307438		4008.37	0.02124887
298.6	-0.00374299		828.59	0.00826516		1358.59	0.01899322		1888.59	0.01827798		2418.58	0.00190197		2948.58	0.00538456		3478.57	-0.00371274		4008.57	0.02110387
298.8	-0.00441359		828.79	0.00885238		1358.79	0.01915865		1888.79	0.01735193		2418.78	0.00145016		2948.78	0.00470815		3478.77	-0.00343591		4008.77	0.02079668
299	-0.00377815		828.99	0.00916043		1358.99	0.02094731		1888.99	0.01712008		2418.98	0.00191909		2948.98	0.00422279		3478.97	-0.00344453		4008.97	0.02088807
299.2	-0.00415808		829.19	0.00930687		1359.19	0.02094254		1889.19	0.01598431		2419.18	0.00168705		2949.18	0.00373067		3479.17	-0.00232611		4009.17	0.01992457
299.4	-0.0046453		829.39	0.00873619		1359.39	0.02004334		1889.39	0.01631272		2419.38	0.00154817		2949.38	0.00334987		3479.37	-0.00195973		4009.37	0.01904726
299.6	-0.00469058		829.59	0.008819		1359.59	0.02018877		1889.59	0.0168284		2419.58	0.00149796		2949.58	0.00314638		3479.57	-0.00089143		4009.57	0.01916625
299.8	-0.00567862		829.79	0.0084716		1359.79	0.02033198		1889.79	0.016492		2419.78	0.00119117		2949.78	0.003465		3479.77	-0.00057745		4009.77	0.01884094
300	-0.00500627		829.99	0.00847555		1359.99	0.01925967		1889.99	0.01603743		2419.98	0.00159143		2949.98	0.00243767		3479.97	-0.00037351		4009.97	0.01912144
300.2	-0.00450289		830.19	0.00814392		1360.19	0.01903753		1890.19	0.01486661		2420.18	0.00101889		2950.18	0.00298136		3480.17	-0.00099277		4010.17	0.01952241
300.4	-0.00312451		830.39	0.00845271		1360.39	0.01936888		1890.39	0.01425057		2420.38	0.0012427		2950.38	0.0036139		3480.37	-0.00118401		4010.37	0.02003621
300.6	-0.00276057		830.59	0.00869917		1360.59	0.01905524		1890.59	0.01327805		2420.58	0.00190129		2950.58	0.00496708		3480.57	-0.00190912		4010.57	0.01924659
300.8	-0.00257909		830.79	0.00838656		1360.79	0.01840788		1890.79	0.01275647		2420.78	0.00276976		2950.78	0.00497503		3480.77	-0.00196969		4010.77	0.01872184
301	-0.00294779		830.99	0.00812816		1360.99	0.01831891		1890.99	0.01280792		2420.98	0.0031565		2950.98	0.0046887		3480.97	-0.00161003		4010.97	0.01833318
301.2	-0.00281867		831.19	0.00744688		1361.19	0.01717274		1891.19	0.01362954		2421.18	0.00360058		2951.18	0.00604658		3481.17	-0.00236544		4011.17	0.01915763
301.4	-0.00283052		831.39	0.00679511		1361.39	0.01633118		1891.39	0.0133889		2421.38	0.00337743		2951.38	0.0065154		3481.37	-0.00297356		4011.37	0.02019263
301.6	-0.00190538		831.59	0.00749595		1361.59	0.01539938		1891.59	0.01387771		2421.58	0.00291783		2951.58	0.006655		3481.57	-0.00300026		4011.57	0.02030288
301.8	-0.00247187		831.79	0.00738514		1361.79	0.01525391		1891.79	0.01492244		2421.78	0.00412831		2951.78	0.00734473		3481.77	-0.00368503		4011.77	0.02148521
302	-0.00187527		831.99	0.00789264		1361.99	0.01545394		1891.99	0.01655236		2421.98	0.00396924		2951.98	0.00807068		3481.97	-0.00371572		4011.97	0.02201076
302.2	-0.0016102		832.19	0.00781189		1362.19	0.01585192		1892.19	0.0173872		2422.18	0.00421192		2952.18	0.00766508		3482.17	-0.00370793		4012.17	0.02219891
302.4	-0.00108031		832.39	0.00913353		1362.39	0.01591495		1892.39	0.01778844		2422.38	0.00451872		2952.38	0.0063408		3482.37	-0.00447262		4012.37	0.02238318
302.6	-0.00155304		832.59	0.01075677		1362.59	0.01602316		1892.59	0.01805739		2422.58	0.00505214		2952.58	0.0051893		3482.57	-0.00431269		4012.57	0.02300744
302.8	-0.00260897		832.79	0.01077362		1362.79	0.01629882		1892.79	0.01830737		2422.78	0.00498896		2952.78	0.00386944		3482.77	-0.00429898		4012.77	0.0229753
303	-0.00270352		832.99	0.0106047		1362.99	0.01636171		1892.99	0.01880387		2422.98	0.00474969		2952.98	0.00376052		3482.97	-0.00379543		4012.97	0.02325105
303.2	-0.00368048		833.19	0.01087263		1363.19	0.0155194		1893.19	0.0195316		2423.18	0.00474224		2953.18	0.00446124		3483.17	-0.00260537		4013.17	0.0234533
303.4	-0.00399295		833.39	0.0109452		1363.39	0.01647102		1893.39	0.02052089		2423.38	0.00501646		2953.38	0.00405562		3483.37	-0.00248382		4013.37	0.02323878
303.6	-0.00448644		833.59	0.01108964		1363.59	0.01634996		1893.59	0.02009837		2423.58	0.00466227		2953.58	0.0040113		3483.57	-0.00197947		4013.57	0.02365337
303.8	-0.0048533		833.79	0.01021322		1363.79	0.01574912		1893.79	0.01995162		2423.78	0.00455619		2953.78	0.0041382		3483.77	-0.00200901		4013.77	0.02357965
304	-0.00409771		833.99	0.01000273		1363.99	0.01522022		1893.99	0.01936203		2423.98	0.00416049		2953.98	0.00374275		3483.97	-0.00254946		4013.97	0.02395327
304.2	-0.00434906		834.19	0.00974098		1364.19	0.0152043		1894.19	0.01810913		2424.18	0.00375065		2954.18	0.00336941		3484.17	-0.00318231		4014.17	0.02318741
304.4	-0.00425317		834.39	0.01003069		1364.39	0.01581574		1894.39	0.01794688		2424.38	0.00407572		2954.38	0.00416456		3484.37	-0.00261308		4014.37	0.02248545
304.6	-0.00439055		834.59	0.00975868		1364.59	0.0158964		1894.59	0.0175007		2424.58	0.00445759		2954.58	0.00419538		3484.57	-0.0027248		4014.57	0.02118737
304.8	-0.00471369		834.79	0.00967637		1364.79	0.01497663		1894.79	0.01840047		2424.78	0.00484306		2954.78	0.00500222		3484.77	-0.00210329		4014.77	0.02133365
305	-0.00537087		834.99	0.0092644		1364.99	0.01467813		1894.99	0.01818634		2424.98	0.0051156		2954.98	0.00568111		3484.97	-0.00165941		4014.97	0.02105664
305.2	-0.00490649		835.19	0.00809593		1365.19	0.01458356		1895.19	0.01790478		2425.18	0.00499518		2955.18	0.00645261		3485.17	-0.00236307		4015.17	0.02166688
305.4	-0.00348431		835.39	0.00901648		1365.39	0.01424511		1895.39	0.01709702		2425.38	0.00431602		2955.38	0.0063905		3485.37	-0.00177839		4015.37	0.02171198
305.6	-0.00285228		835.59	0.00969901		1365.59	0.01435369		1895.59	0.0172716		2425.58	0.00469759		2955.58	0.00565568		3485.57	-0.00255907		4015.57	0.02202411
305.8	-0.00252062		835.79	0.00981431		1365.79	0.01479781		1895.79	0.01860776		2425.78	0.00493245		2955.78	0.00598392		3485.77	-0.00346106		4015.77	0.0226759
306	-0.00063366		835.99	0.01051118		1365.99	0.01461611		1895.99	0.01901801		2425.98	0.00461842		2955.98	0.00549771		3485.97	-0.0042142		4015.97	0.02289569
306.2	-0.00033275		836.19	0.01078508		1366.19	0.01507366		1896.19	0.0191176		2426.18	0.00532763		2956.18	0.00500278		3486.17	-0.00457773		4016.17	0.02260083
306.4	-0.00110687		836.39	0.01170979		1366.39	0.01532098		1896.39	0.01855124		2426.38	0.00503732		2956.38	0.00479269		3486.37	-0.00385659		4016.37	0.02267041
306.6	-0.00156736		836.59	0.01276252		1366.59	0.01641005		1896.59	0.01791393		2426.58	0.00459699		2956.58	0.00532881		3486.57	-0.00311979		4016.57	0.0232587
306.8	-0.00159979		836.79	0.0117898		1366.79	0.01759415		1896.79	0.0170863		2426.78	0.00392937		2956.78	0.00463001		3486.77	-0.00278943		4016.77	0.02384522
307	-0.00130309		836.99	0.01174567		1366.99	0.01835207		1896.99	0.01722879		2426.98	0.0033809		2956.98	0.00585171		3486.97	-0.00231751		4016.97	0.02421704
307.2	-0.00141878		837.19	0.01226565		1367.19	0.01940776		1897.19	0.01665556		2427.18	0.00431208		2957.18	0.00667389		3487.17	-0.00204942		4017.17	0.0243683
307.4	-0.00126476		837.39	0.0121015		1367.39	0.0202972		1897.39	0.01583229		2427.38	0.00433505		2957.38	0.00694492		3487.37	-0.00273025		4017.37	0.02345585
307.6	-0.00071887		837.59	0.0127664		1367.59	0.01938986		1897.59	0.01555917		2427.58	0.00397809		2957.58	0.00714027		3487.57	-0.0024256		4017.57	0.02285416
307.8	-0.00009809		837.79	0.01149836		1367.79	0.0200791		1897.79	0.01504571		2427.78	0.00360658		2957.78	0.00680546		3487.77	-0.00319335		4017.77	0.02262166
308	-0.00042484		837.99	0.01140523		1367.99	0.01964901		1897.99	0.01451885		2427.98	0.00250357		2957.98	0.00696596		3487.97	-0.00319507		4017.97	0.02301474
308.2	-0.00182317		838.19	0.01151401		1368.19	0.01909532		1898.19	0.01348408		2428.18	0.00209901		2958.18	0.00651173		3488.17	-0.00281227		4018.17	0.02247523
308.4	-0.00281298		838.39	0.01137265		1368.39	0.01898898		1898.39	0.01318438		2428.38	0.00197299		2958.38	0.00779683		3488.37	-0.00214413		4018.37	0.0230473
308.6	-0.00291152		838.59	0.01180853		1368.59	0.01800568		1898.59	0.01336348		2428.58	0.00234055		2958.58	0.0081786		3488.57	-0.00192284		4018.57	0.02270496
308.8	-0.00404564		838.79	0.01104286		1368.79	0.01666105		1898.79	0.01368119		2428.78	0.00283244		2958.78	0.00881591		3488.77	-0.0021801		4018.77	0.02283633
309	-0.00491036		838.99	0.00975035		1368.99	0.01625079		1898.99	0.01262727		2428.98	0.00317899		2958.98	0.00873871		3488.97	-0.00248197		4018.97	0.02321503
309.2	-0.00469744		839.19	0.01090924		1369.19	0.01618348		1899.19	0.01220261		2429.18	0.00200358		2959.18	0.0084749		3489.17	-0.00278204		4019.17	0.02310686
309.4	-0.00445996		839.39	0.01201248		1369.39	0.01517606		1899.39	0.0133978		2429.38	0.0020769		2959.38	0.00745165		3489.37	-0.00234008		4019.37	0.023881
309.6	-0.0046237		839.59	0.0125866		1369.59	0.01408364		1899.59	0.01493041		2429.58	0.00221941		2959.58	0.00584434		3489.57	-0.00280159		4019.57	0.02399541
309.8	-0.00401486		839.79	0.01255477		1369.79	0.01353836		1899.79	0.01615276		2429.78	0.00195353		2959.78	0.00599292		3489.77	-0.00307519		4019.77	0.02337551
310	-0.00347181		839.99	0.01235847		1369.99	0.01355901		1899.99	0.01634608		2429.98	0.00224543		2959.98	0.00497847		3489.97	-0.00351596		4019.97	0.02355541
310.2	-0.00469628		840.19	0.01197296		1370.19	0.01431089		1900.19	0.01597578		2430.18	0.00190236		2960.18	0.00385012		3490.17	-0.00279662		4020.17	0.0229771
310.4	-0.00452255		840.39	0.01235237		1370.39	0.01412716		1900.39	0.01621323		2430.38	0.00067632		2960.38	0.00300948		3490.37	-0.00258295		4020.37	0.02342725
310.6	-0.0045404		840.59	0.01232163		1370.59	0.01437395		1900.59	0.01631531		2430.58	0.00087202		2960.58	0.00242719		3490.57	-0.00290795		4020.57	0.023795
310.8	-0.00464339		840.79	0.0115419		1370.79	0.01472187		1900.79	0.01695389		2430.78	0.0008592		2960.78	0.00159025		3490.77	-0.00360296		4020.77	0.0243771
311	-0.00389985		840.99	0.01138986		1370.99	0.01553155		1900.99	0.01846465		2430.98	0.00059276		2960.98	0.00206367		3490.97	-0.00339585		4020.97	0.02330359
311.2	-0.00377409		841.19	0.01084254		1371.19	0.01612348		1901.19	0.01855502		2431.18	0.00184125		2961.18	0.00210127		3491.17	-0.00402407		4021.17	0.02315069
311.4	-0.00290661		841.39	0.01087906		1371.39	0.0171657		1901.39	0.01946134		2431.38	0.00098683		2961.38	0.00245332		3491.37	-0.00399495		4021.37	0.02327626
311.6	-0.00118256		841.59	0.01020741		1371.59	0.01799488		1901.59	0.02005365		2431.58	0.00076945		2961.58	0.00227918		3491.57	-0.00327685		4021.57	0.02326445
311.8	-0.0007482		841.79	0.00855712		1371.79	0.01843313		1901.79	0.01910134		2431.78	0.00103374		2961.78	0.00248837		3491.77	-0.00207728		4021.77	0.02351964
312	-0.00123643		841.99	0.00791752		1371.99	0.01876451		1901.99	0.0193303		2431.98	0.00087921		2961.98	0.00324584		3491.97	-0.00173083		4021.97	0.02344303
312.2	-0.00095185		842.19	0.00706801		1372.19	0.01932298		1902.19	0.01921428		2432.18	0.00106558		2962.18	0.00404514		3492.17	-0.00086944		4022.17	0.02264278
312.4	-0.00026203		842.39	0.00687911		1372.39	0.01977318		1902.39	0.01830544		2432.38	0.0017463		2962.38	0.00566068		3492.37	-0.00058921		4022.37	0.02284977
312.6	0.00037223		842.59	0.00635217		1372.59	0.01941243		1902.59	0.01819755		2432.58	0.00230592		2962.58	0.006784		3492.57	-0.00033131		4022.57	0.0219694
312.8	-0.00048335		842.79	0.0060445		1372.79	0.01966627		1902.79	0.01763322		2432.78	0.00210861		2962.78	0.00775298		3492.77	-0.00087002		4022.77	0.02270739
313	0.00007325		842.99	0.00689775		1372.99	0.01968922		1902.99	0.01760453		2432.98	0.00189409		2962.98	0.00826789		3492.97	-0.00026347		4022.97	0.02338939
313.2	0.00010294		843.19	0.00786801		1373.19	0.01982601		1903.19	0.01770731		2433.18	0.00150853		2963.18	0.00835976		3493.17	0.00032592		4023.17	0.0231707
313.4	0.00054715		843.39	0.00769431		1373.39	0.01904663		1903.39	0.01905797		2433.38	0.00195851		2963.38	0.00782835		3493.37	0.0006694		4023.37	0.02355196
313.6	0.00094971		843.59	0.00854545		1373.59	0.01932691		1903.59	0.01994074		2433.58	0.00153454		2963.58	0.00788136		3493.57	0.00039436		4023.57	0.02283273
313.8	0.00003739		843.79	0.00846534		1373.79	0.01884428		1903.79	0.01940305		2433.78	0.00169971		2963.78	0.00814056		3493.77	-0.00006099		4023.77	0.02279421
314	-0.00126983		843.99	0.00845249		1373.99	0.01877963		1903.99	0.01812468		2433.98	0.00230019		2963.98	0.00756826		3493.97	-0.00042166		4023.97	0.02356005
314.2	-0.00205852		844.19	0.00897543		1374.19	0.01847849		1904.19	0.01777341		2434.18	0.00264105		2964.18	0.00650221		3494.17	-0.00058741		4024.17	0.02360509
314.4	-0.00228475		844.39	0.0105075		1374.39	0.01854974		1904.39	0.01860322		2434.38	0.00302486		2964.38	0.00647894		3494.37	-0.00156375		4024.37	0.02428639
314.6	-0.00393254		844.59	0.0102472		1374.59	0.0185903		1904.59	0.01897476		2434.58	0.00359965		2964.58	0.00649926		3494.57	-0.00244633		4024.57	0.02448861
314.8	-0.00424829		844.79	0.01013488		1374.79	0.01956135		1904.79	0.01926994		2434.78	0.00376326		2964.78	0.00661888		3494.77	-0.00261561		4024.77	0.02507027
315	-0.0042634		844.99	0.01017943		1374.99	0.0197164		1904.99	0.01876397		2434.98	0.00242721		2964.98	0.00623651		3494.97	-0.00246767		4024.97	0.0248834
315.2	-0.00422031		845.19	0.00981486		1375.19	0.01984867		1905.19	0.01889878		2435.18	0.00344284		2965.18	0.00599853		3495.17	-0.00251424		4025.17	0.02498204
315.4	-0.00427671		845.39	0.01063901		1375.39	0.02134638		1905.39	0.01855521		2435.38	0.00266431		2965.38	0.00688506		3495.37	-0.00211081		4025.37	0.02526831
315.6	-0.00392742		845.59	0.00983712		1375.59	0.02235388		1905.59	0.0182999		2435.58	0.00311646		2965.58	0.00725569		3495.57	-0.00171498		4025.57	0.02521334
315.8	-0.00339788		845.79	0.00980161		1375.79	0.02191289		1905.79	0.01816824		2435.78	0.00371955		2965.78	0.00783029		3495.77	-0.00074522		4025.77	0.02495772
316	-0.00254875		845.99	0.00917574		1375.99	0.02326445		1905.99	0.01850273		2435.98	0.00430636		2965.98	0.00845653		3495.97	-0.00131397		4025.97	0.02527501
316.2	-0.00170075		846.19	0.00944162		1376.19	0.02315202		1906.19	0.01815146		2436.18	0.00426485		2966.18	0.00930084		3496.17	-0.00042782		4026.17	0.02552596
316.4	-0.00168389		846.39	0.00932086		1376.39	0.02329293		1906.39	0.01794006		2436.38	0.00405683		2966.38	0.01024079		3496.37	-0.00031541		4026.37	0.02550057
316.6	-0.00190911		846.59	0.00812452		1376.59	0.0223174		1906.59	0.01851524		2436.58	0.00374619		2966.58	0.01089169		3496.57	0.00013955		4026.57	0.02634915
316.8	-0.00265493		846.79	0.00856509		1376.79	0.02274629		1906.79	0.01835136		2436.78	0.00324803		2966.78	0.01123193		3496.77	0.00005136		4026.77	0.02713072
317	-0.0028815		846.99	0.0084907		1376.99	0.02193942		1906.99	0.01876342		2436.98	0.00288746		2966.98	0.01094438		3496.97	-0.00010542		4026.97	0.02749281
317.2	-0.00369488		847.19	0.00780379		1377.19	0.02205945		1907.19	0.01910031		2437.18	0.00382235		2967.18	0.01128927		3497.17	-0.0002078		4027.17	0.02788552
317.4	-0.00389308		847.39	0.00872039		1377.39	0.02196399		1907.39	0.01948698		2437.38	0.00381434		2967.38	0.0106164		3497.37	-0.00049499		4027.37	0.02849645
317.6	-0.00461298		847.59	0.00936695		1377.59	0.02161824		1907.59	0.01944276		2437.58	0.0044831		2967.58	0.01050744		3497.57	-0.00137978		4027.57	0.02903463
317.8	-0.0062617		847.79	0.00937927		1377.79	0.02074213		1907.79	0.01854309		2437.78	0.0051828		2967.78	0.00947393		3497.77	-0.00252207		4027.77	0.02932501
318	-0.00712465		847.99	0.00947367		1377.99	0.02111321		1907.99	0.01823697		2437.98	0.00595039		2967.98	0.00875532		3497.97	-0.00345824		4027.97	0.02935479
318.2	-0.00718916		848.19	0.01008876		1378.19	0.02172698		1908.19	0.01823276		2438.18	0.00703733		2968.18	0.00821941		3498.17	-0.00391744		4028.17	0.02889851
318.4	-0.00777883		848.39	0.0104889		1378.39	0.0217655		1908.39	0.01874281		2438.38	0.00683628		2968.38	0.00743895		3498.37	-0.00389009		4028.37	0.02913117
318.6	-0.00792962		848.59	0.00997947		1378.59	0.02212821		1908.59	0.0195044		2438.58	0.00577966		2968.58	0.00658426		3498.57	-0.00463975		4028.57	0.02918623
318.8	-0.00812847		848.79	0.00979708		1378.79	0.02223537		1908.79	0.0184705		2438.78	0.00487368		2968.78	0.0056376		3498.77	-0.00498175		4028.77	0.02833824
319	-0.00770526		848.99	0.0101995		1378.99	0.02222565		1908.99	0.01849576		2438.98	0.00392018		2968.98	0.00459362		3498.97	-0.0047329		4028.97	0.02734708
319.2	-0.00714286		849.19	0.00973417		1379.19	0.02288364		1909.19	0.01993056		2439.18	0.00486794		2969.18	0.00435736		3499.17	-0.00439768		4029.17	0.0262722
319.4	-0.00694166		849.39	0.01040825		1379.39	0.02372111		1909.39	0.01912007		2439.38	0.00450537		2969.38	0.00459754		3499.37	-0.00481454		4029.37	0.02633421
319.6	-0.0052203		849.59	0.01021382		1379.59	0.02357919		1909.59	0.02092041		2439.58	0.0040814		2969.58	0.00493427		3499.57	-0.00449916		4029.57	0.02562893
319.8	-0.00390742		849.79	0.01079231		1379.79	0.02257016		1909.79	0.02141365		2439.78	0.00341843		2969.78	0.00489749		3499.77	-0.00321739		4029.77	0.02529382
320	-0.00325878		849.99	0.01032738		1379.99	0.02305004		1909.99	0.02081775		2439.98	0.00303388		2969.98	0.0047725		3499.97	-0.00282608		4029.97	0.02502085
320.2	-0.0031223		850.19	0.00988729		1380.19	0.02220287		1910.19	0.021041		2440.18	0.00199157		2970.18	0.00474024		3500.17	-0.00220999		4030.17	0.02522163
320.4	-0.00304688		850.39	0.00905458		1380.39	0.02231843		1910.39	0.02105755		2440.38	0.00179977		2970.38	0.00587406		3500.37	-0.00095368		4030.37	0.0250009
320.6	-0.00334868		850.59	0.00830933		1380.59	0.02140537		1910.59	0.01981613		2440.58	0.00217046		2970.58	0.00693591		3500.57	-0.00017501		4030.57	0.02570644
320.8	-0.00355519		850.79	0.00861215		1380.79	0.02147508		1910.79	0.01891611		2440.78	0.00229021		2970.78	0.00745738		3500.77	-0.0002613		4030.77	0.02569693
321	-0.0036457		850.99	0.00908249		1380.99	0.0215997		1910.99	0.01854683		2440.98	0.00279722		2970.98	0.00805423		3500.97	0.00042784		4030.97	0.02584451
321.2	-0.004223		851.19	0.0093847		1381.19	0.0214575		1911.19	0.01830009		2441.18	0.00285133		2971.18	0.00844174		3501.17	0.00049287		4031.17	0.0264198
321.4	-0.00461962		851.39	0.01044577		1381.39	0.02004757		1911.39	0.01744225		2441.38	0.00257287		2971.38	0.00852503		3501.37	-0.00029974		4031.37	0.02700679
321.6	-0.00451994		851.59	0.01142543		1381.59	0.01960639		1911.59	0.01759684		2441.58	0.00286326		2971.58	0.00882837		3501.57	0.00030656		4031.57	0.02729321
321.8	-0.00533197		851.79	0.01121882		1381.79	0.01954639		1911.79	0.01744967		2441.78	0.0028023		2971.78	0.0079773		3501.77	-0.00105656		4031.77	0.0278762
322	-0.00632674		851.99	0.01125279		1381.99	0.01954384		1911.99	0.01807679		2441.98	0.00328147		2971.98	0.00766954		3501.97	-0.00086478		4031.97	0.02768547
322.2	-0.0067044		852.19	0.01119296		1382.19	0.01899807		1912.19	0.01788702		2442.18	0.00366734		2972.18	0.00704991		3502.17	-0.0005604		4032.17	0.02807132
322.4	-0.00679227		852.39	0.01103076		1382.39	0.01873256		1912.39	0.01893059		2442.38	0.00282075		2972.38	0.00579957		3502.37	-0.00062208		4032.37	0.02894054
322.6	-0.00574334		852.59	0.01101779		1382.59	0.01932905		1912.59	0.01979021		2442.58	0.00305437		2972.58	0.00477695		3502.57	-0.00195496		4032.57	0.02854664
322.8	-0.00578011		852.79	0.01125366		1382.79	0.01965202		1912.79	0.01945379		2442.78	0.0032841		2972.78	0.00464838		3502.77	-0.00181467		4032.77	0.02782523
323	-0.00442372		852.99	0.01161899		1382.99	0.01987667		1912.99	0.01991729		2442.98	0.00460506		2972.98	0.00400875		3502.97	-0.00144483		4032.97	0.02782759
323.2	-0.00344829		853.19	0.01133048		1383.19	0.02057423		1913.19	0.0195229		2443.18	0.00433006		2973.18	0.00439517		3503.17	-0.00189362		4033.17	0.02773192
323.4	-0.00194261		853.39	0.01172613		1383.39	0.02120822		1913.39	0.01966809		2443.38	0.00390935		2973.38	0.00511783		3503.37	-0.00175513		4033.37	0.02745907
323.6	-0.0008943		853.59	0.0117125		1383.59	0.02138239		1913.59	0.01991817		2443.58	0.00289457		2973.58	0.00550963		3503.57	-0.00181154		4033.57	0.02804115
323.8	-0.00042087		853.79	0.01175961		1383.79	0.02167674		1913.79	0.01873385		2443.78	0.00268288		2973.78	0.00557521		3503.77	-0.00167818		4033.77	0.02857755
324	-0.00016644		853.99	0.01018327		1383.99	0.02216271		1913.99	0.01801023		2443.98	0.00226454		2973.98	0.00647034		3503.97	-0.00152888		4033.97	0.02859949
324.2	0.00008588		854.19	0.00915518		1384.19	0.0215064		1914.19	0.01814797		2444.18	0.00256783		2974.18	0.0080111		3504.17	-0.0022341		4034.17	0.02833227
324.4	0.00017342		854.39	0.00836906		1384.39	0.02199618		1914.39	0.01713828		2444.38	0.0035398		2974.38	0.00888849		3504.37	-0.00201534		4034.37	0.02821714
324.6	-0.00055617		854.59	0.00821625		1384.59	0.02172881		1914.59	0.01613763		2444.58	0.00430119		2974.58	0.00937631		3504.57	-0.00254544		4034.57	0.02769972
324.8	-0.00079383		854.79	0.00742221		1384.79	0.0221542		1914.79	0.01541417		2444.78	0.0045691		2974.78	0.01034012		3504.77	-0.00356275		4034.77	0.02735357
325	-0.00118447		854.99	0.00783749		1384.99	0.02259377		1914.99	0.01519323		2444.98	0.00443942		2974.98	0.01066455		3504.97	-0.00438009		4034.97	0.02640018
325.2	-0.0017621		855.19	0.00766797		1385.19	0.021262		1915.19	0.01531213		2445.18	0.00420577		2975.18	0.01062402		3505.17	-0.00498144		4035.17	0.02803979
325.4	-0.00235732		855.39	0.00803731		1385.39	0.02066725		1915.39	0.01561176		2445.38	0.00518626		2975.38	0.01072334		3505.37	-0.00526002		4035.37	0.02848443
325.6	-0.00361416		855.59	0.00822375		1385.59	0.02126703		1915.59	0.01623061		2445.58	0.00457784		2975.58	0.0100799		3505.57	-0.00447426		4035.57	0.02934894
325.8	-0.00514096		855.79	0.00755364		1385.79	0.01998733		1915.79	0.01623193		2445.78	0.00481694		2975.78	0.0089789		3505.77	-0.00567477		4035.77	0.02939234
326	-0.00686505		855.99	0.00817077		1385.99	0.01934863		1915.99	0.01677816		2445.98	0.00447845		2975.98	0.00825709		3505.97	-0.0054488		4035.97	0.02972042
326.2	-0.00780286		856.19	0.00801301		1386.19	0.01928215		1916.19	0.01668386		2446.18	0.00485401		2976.18	0.00797218		3506.17	-0.00569842		4036.17	0.02997784
326.4	-0.0078236		856.39	0.00809999		1386.39	0.01990297		1916.39	0.01740657		2446.38	0.00485847		2976.38	0.00699757		3506.37	-0.00554608		4036.37	0.02987647
326.6	-0.00699578		856.59	0.00854286		1386.59	0.02006148		1916.59	0.0182075		2446.58	0.00488461		2976.58	0.00669666		3506.57	-0.00626638		4036.57	0.02967183
326.8	-0.00673939		856.79	0.00819963		1386.79	0.01982438		1916.79	0.01797365		2446.78	0.00396553		2976.78	0.0063482		3506.77	-0.00517784		4036.77	0.02989438
327	-0.00648323		856.99	0.0085075		1386.99	0.01957268		1916.99	0.01842777		2446.98	0.00356002		2976.98	0.00606658		3506.97	-0.00437425		4036.97	0.02986979
327.2	-0.00672879		857.19	0.00851869		1387.19	0.01957579		1917.19	0.01864703		2447.18	0.00199623		2977.18	0.00717915		3507.17	-0.00376677		4037.17	0.03036393
327.4	-0.00648473		857.39	0.00799795		1387.39	0.0192702		1917.39	0.02001159		2447.38	0.00169648		2977.38	0.00763647		3507.37	-0.00265677		4037.37	0.03037471
327.6	-0.00607099		857.59	0.0077384		1387.59	0.02006707		1917.59	0.01934914		2447.58	0.00082328		2977.58	0.00788208		3507.57	-0.00279923		4037.57	0.03072448
327.8	-0.00492555		857.79	0.0080756		1387.79	0.02028452		1917.79	0.01998006		2447.78	0.00085117		2977.78	0.00824646		3507.77	-0.00223983		4037.77	0.03029087
328	-0.00481754		857.99	0.00727571		1387.99	0.02050605		1917.99	0.02055471		2447.98	0.00016096		2977.98	0.0091889		3507.97	-0.00159035		4037.97	0.03050209
328.2	-0.00414929		858.19	0.00733819		1388.19	0.02037659		1918.19	0.02113011		2448.18	0.00038029		2978.18	0.0100986		3508.17	-0.00251953		4038.17	0.02972295
328.4	-0.00340306		858.39	0.00714351		1388.39	0.02106168		1918.39	0.02087539		2448.38	0.00078408		2978.38	0.00911426		3508.37	-0.00268944		4038.37	0.03016813
328.6	-0.00389394		858.59	0.00868454		1388.59	0.02212074		1918.59	0.02053187		2448.58	0.00121883		2978.58	0.00981497		3508.57	-0.00295521		4038.57	0.02983306
328.8	-0.00307276		858.79	0.00798953		1388.79	0.02265336		1918.79	0.0201748		2448.78	0.00157896		2978.78	0.01122016		3508.77	-0.00217384		4038.77	0.02978104
329	-0.00244938		858.99	0.00915621		1388.99	0.02308581		1918.99	0.02106099		2448.98	0.00198955		2978.98	0.01107469		3508.97	-0.00220819		4038.97	0.03037104
329.2	-0.0019179		859.19	0.01001502		1389.19	0.02276474		1919.19	0.02254187		2449.18	0.00344046		2979.18	0.01161785		3509.17	-0.00095282		4039.17	0.03148292
329.4	-0.00227547		859.39	0.01074085		1389.39	0.02376698		1919.39	0.02307049		2449.38	0.00369995		2979.38	0.01222847		3509.37	-0.00099464		4039.37	0.0308848
329.6	-0.00296432		859.59	0.01155294		1389.59	0.02426289		1919.59	0.02252917		2449.58	0.00431742		2979.58	0.01102218		3509.57	-0.00041057		4039.57	0.03065211
329.8	-0.00346406		859.79	0.01232235		1389.79	0.0244146		1919.79	0.02271694		2449.78	0.00476047		2979.78	0.00992363		3509.77	-0.0007013		4039.77	0.02996145
330	-0.00380127		859.99	0.01325215		1389.99	0.02444055		1919.99	0.02229413		2449.98	0.00486576		2979.98	0.01016128		3509.97	-0.00152756		4039.97	0.0294581
330.2	-0.00391745		860.19	0.01263779		1390.19	0.02524422		1920.19	0.02246055		2450.18	0.0061606		2980.18	0.00980567		3510.17	-0.00184544		4040.17	0.02883804
330.4	-0.00419761		860.39	0.01332507		1390.39	0.02528538		1920.39	0.02256351		2450.38	0.00609957		2980.38	0.00957697		3510.37	-0.00149413		4040.37	0.02876951
330.6	-0.00353247		860.59	0.01370278		1390.59	0.0245451		1920.59	0.02319563		2450.58	0.00609346		2980.58	0.00989556		3510.57	-0.00135481		4040.57	0.02921375
330.8	-0.00388946		860.79	0.01329161		1390.79	0.02399665		1920.79	0.02287897		2450.78	0.00657641		2980.78	0.00983726		3510.77	-0.00097634		4040.77	0.02879883
331	-0.00501757		860.99	0.01265655		1390.99	0.02421848		1920.99	0.02292985		2450.98	0.00687612		2980.98	0.01042919		3510.97	-0.00117071		4040.97	0.02842705
331.2	-0.00490158		861.19	0.01150325		1391.19	0.02438978		1921.19	0.02250453		2451.18	0.00646295		2981.18	0.0101656		3511.17	-0.00120523		4041.17	0.0281452
331.4	-0.00424135		861.39	0.00974148		1391.39	0.02392134		1921.39	0.0214905		2451.38	0.00618839		2981.38	0.00963486		3511.37	-0.00056462		4041.37	0.02774603
331.6	-0.00351832		861.59	0.00973936		1391.59	0.02493094		1921.59	0.02020028		2451.58	0.00557984		2981.58	0.00920166		3511.57	-0.00088237		4041.57	0.0277763
331.8	-0.00251296		861.79	0.0101939		1391.79	0.02453067		1921.79	0.01980996		2451.78	0.00499311		2981.78	0.00917286		3511.77	-0.00128177		4041.77	0.02864016
332	-0.00309066		861.99	0.00942068		1391.99	0.02422094		1921.99	0.01898634		2451.98	0.0043794		2981.98	0.00959576		3511.97	-0.00112386		4041.97	0.02981215
332.2	-0.00240739		862.19	0.00963724		1392.19	0.02406426		1922.19	0.0184582		2452.18	0.00393731		2982.18	0.00979937		3512.17	-0.00162015		4042.17	0.02988624
332.4	-0.00255726		862.39	0.00941951		1392.39	0.02326574		1922.39	0.0178144		2452.38	0.00357588		2982.38	0.00964097		3512.37	-0.0015287		4042.37	0.03090011
332.6	-0.00234899		862.59	0.01039986		1392.59	0.02243348		1922.59	0.01694001		2452.58	0.00277832		2982.58	0.01037024		3512.57	-0.00120913		4042.57	0.03105664
332.8	-0.00148116		862.79	0.00948018		1392.79	0.02166045		1922.79	0.0167374		2452.78	0.00264429		2982.78	0.01057245		3512.77	-0.00036231		4042.77	0.03099676
333	-0.00150331		862.99	0.00999847		1392.99	0.02171794		1922.99	0.01770429		2452.98	0.00307933		2982.98	0.01041371		3512.97	-0.00135396		4042.97	0.03099613
333.2	-0.00186862		863.19	0.01026108		1393.19	0.02160029		1923.19	0.01804934		2453.18	0.00305771		2983.18	0.01070809		3513.17	-0.00152087		4043.17	0.03035091
333.4	-0.00284628		863.39	0.01032557		1393.39	0.02199019		1923.39	0.01818371		2453.38	0.00297399		2983.38	0.00944464		3513.37	-0.0018579		4043.37	0.03010405
333.6	-0.00365114		863.59	0.01138831		1393.59	0.0217549		1923.59	0.01830075		2453.58	0.00308632		2983.58	0.00755342		3513.57	-0.00172031		4043.57	0.02994085
333.8	-0.00424007		863.79	0.01235605		1393.79	0.02222737		1923.79	0.01981391		2453.78	0.00299974		2983.78	0.00767172		3513.77	-0.00227119		4043.77	0.02982263
334	-0.00442237		863.99	0.01308559		1393.99	0.02217043		1923.99	0.02012879		2453.98	0.0037672		2983.98	0.00804796		3513.97	-0.0024124		4043.97	0.029738
334.2	-0.00540899		864.19	0.01310284		1394.19	0.02271697		1924.19	0.02130551		2454.18	0.00442898		2984.18	0.008024		3514.17	-0.00159385		4044.17	0.03023557
334.4	-0.00596687		864.39	0.01349272		1394.39	0.02363615		1924.39	0.02233784		2454.38	0.00478341		2984.38	0.00883113		3514.37	-0.00079128		4044.37	0.03036062
334.6	-0.00623775		864.59	0.0132862		1394.59	0.02409518		1924.59	0.02217841		2454.58	0.00562444		2984.58	0.00860618		3514.57	-0.0002061		4044.57	0.0315733
334.8	-0.00724404		864.79	0.01228551		1394.79	0.02489105		1924.79	0.02222069		2454.78	0.00623086		2984.78	0.00814071		3514.77	-0.00050481		4044.77	0.03135573
335	-0.00775441		864.99	0.01095945		1394.99	0.0255066		1924.99	0.02264014		2454.98	0.00520137		2984.98	0.00821118		3514.97	-0.00044963		4044.97	0.03140876
335.2	-0.00702236		865.19	0.01084801		1395.19	0.0258498		1925.19	0.02204369		2455.18	0.00435366		2985.18	0.00700101		3515.17	0.00027163		4045.17	0.03143852
335.4	-0.00677913		865.39	0.01038294		1395.39	0.02547236		1925.39	0.02232922		2455.38	0.00460801		2985.38	0.00684185		3515.37	0.00080937		4045.37	0.03085748
335.6	-0.00610744		865.59	0.01036738		1395.59	0.0263292		1925.59	0.02236511		2455.58	0.00494245		2985.58	0.00732332		3515.57	0.0003042		4045.57	0.03041144
335.8	-0.00536131		865.79	0.01059447		1395.79	0.02621417		1925.79	0.0219653		2455.78	0.00421986		2985.78	0.00858378		3515.77	0.00053005		4045.77	0.03007453
336	-0.0046414		865.99	0.0091241		1395.99	0.02542821		1925.99	0.02158581		2455.98	0.00437966		2985.98	0.00948392		3515.97	0.00039223		4045.97	0.03004729
336.2	-0.00412474		866.19	0.00921962		1396.19	0.02459019		1926.19	0.02221982		2456.18	0.00387717		2986.18	0.01013964		3516.17	-0.00063749		4046.17	0.02946354
336.4	-0.00270376		866.39	0.00856553		1396.39	0.02358169		1926.39	0.02198414		2456.38	0.0036429		2986.38	0.01066834		3516.37	-0.00049818		4046.37	0.0294565
336.6	-0.00127473		866.59	0.00799082		1396.59	0.02351006		1926.59	0.0222624		2456.58	0.00274715		2986.58	0.01037437		3516.57	-0.00016886		4046.57	0.02918841
336.8	-0.00102555		866.79	0.00728504		1396.79	0.02328868		1926.79	0.02263992		2456.78	0.00390931		2986.78	0.01059399		3516.77	-0.00019768		4046.77	0.02880064
337	-0.00141137		866.99	0.00675054		1396.99	0.02288605		1926.99	0.0225166		2456.98	0.00353812		2986.98	0.01056094		3516.97	-0.00050059		4046.97	0.02902457
337.2	-0.00143339		867.19	0.006465		1397.19	0.0223067		1927.19	0.0222852		2457.18	0.00360758		2987.18	0.01001627		3517.17	-0.00130095		4047.17	0.02910464
337.4	-0.00104998		867.39	0.0069871		1397.39	0.02150463		1927.39	0.02281065		2457.38	0.00462422		2987.38	0.00896972		3517.37	-0.00114961		4047.37	0.02985501
337.6	-0.00144024		867.59	0.00743154		1397.59	0.0221063		1927.59	0.02339781		2457.58	0.00512027		2987.58	0.00904859		3517.57	-0.00118537		4047.57	0.03077857
337.8	-0.00219196		867.79	0.00824338		1397.79	0.02297692		1927.79	0.02398823		2457.78	0.0062946		2987.78	0.00907644		3517.77	-0.00063163		4047.77	0.03133744
338	-0.00292773		867.99	0.00855635		1397.99	0.02326165		1927.99	0.02353109		2457.98	0.0068665		2987.98	0.00913434		3517.97	-0.00003965		4047.97	0.03166677
338.2	-0.00363972		868.19	0.0089442		1398.19	0.02336162		1928.19	0.02383054		2458.18	0.00618325		2988.18	0.00941651		3518.17	0.00005721		4048.17	0.03269612
338.4	-0.00457128		868.39	0.00909167		1398.39	0.02466951		1928.39	0.02403817		2458.38	0.00633569		2988.38	0.00901496		3518.37	0.00027676		4048.37	0.03389915
338.6	-0.00516843		868.59	0.00952324		1398.59	0.02450826		1928.59	0.0228829		2458.58	0.00667968		2988.58	0.00844681		3518.57	0.00057813		4048.57	0.03534201
338.8	-0.00475644		868.79	0.00933427		1398.79	0.02458095		1928.79	0.02355665		2458.78	0.00662443		2988.78	0.00803244		3518.77	0.0006885		4048.77	0.03495807
339	-0.00455372		868.99	0.00978525		1398.99	0.02473457		1928.99	0.02253646		2458.98	0.00559891		2988.98	0.00876359		3518.97	0.00035624		4048.97	0.03519913
339.2	-0.00381482		869.19	0.01131231		1399.19	0.0260176		1929.19	0.02166001		2459.18	0.00536322		2989.18	0.00832648		3519.17	0.00046485		4049.17	0.03470842
339.4	-0.00371074		869.39	0.01048635		1399.39	0.02591112		1929.39	0.02054333		2459.38	0.00611302		2989.38	0.00888631		3519.37	0.00074295		4049.37	0.03317523
339.6	-0.00198338		869.59	0.01057711		1399.59	0.02630279		1929.59	0.01948385		2459.58	0.00628286		2989.58	0.00945643		3519.57	0.00030008		4049.57	0.03269281
339.8	-0.00092066		869.79	0.01056108		1399.79	0.02679463		1929.79	0.0191497		2459.78	0.00550259		2989.78	0.00923507		3519.77	0.00003417		4049.77	0.03163226
340	-0.0001774		869.99	0.00970786		1399.99	0.02618322		1929.99	0.01912832		2459.98	0.00561612		2989.98	0.00964081		3519.97	-0.00135144		4049.97	0.030838
340.2	0.00029216		870.19	0.01022299		1400.19	0.0263328		1930.19	0.01984405		2460.18	0.00525986		2990.18	0.01003618		3520.17	-0.00141268		4050.17	0.0302178
340.4	0.0016551		870.39	0.00976924		1400.39	0.02690754		1930.39	0.02031764		2460.38	0.00504568		2990.38	0.00994018		3520.37	-0.0015232		4050.37	0.03050711
340.6	0.00202557		870.59	0.00943742		1400.59	0.0275692		1930.59	0.02059126		2460.58	0.00453799		2990.58	0.01058439		3520.57	-0.00109917		4050.57	0.02986925
340.8	0.00158436		870.79	0.00960236		1400.79	0.02694066		1930.79	0.0199467		2460.78	0.0057294		2990.78	0.01055144		3520.77	-0.00138195		4050.77	0.02959488
341	0.0013912		870.99	0.00984173		1400.99	0.02625818		1930.99	0.01964941		2460.98	0.00492224		2990.98	0.01019897		3520.97	-0.00145803		4050.97	0.03005917
341.2	0.00131138		871.19	0.01019484		1401.19	0.02570221		1931.19	0.02095197		2461.18	0.00523055		2991.18	0.00991029		3521.17	-0.00255978		4051.17	0.02953439
341.4	0.00089446		871.39	0.01057457		1401.39	0.0258357		1931.39	0.02216206		2461.38	0.00577593		2991.38	0.00988945		3521.37	-0.00214261		4051.37	0.02980799
341.6	-0.00085789		871.59	0.01085127		1401.59	0.02642401		1931.59	0.02372822		2461.58	0.0061678		2991.58	0.01003542		3521.57	-0.00188601		4051.57	0.02942159
341.8	-0.00140663		871.79	0.01207918		1401.79	0.02619437		1931.79	0.02460498		2461.78	0.00536786		2991.78	0.00978343		3521.77	-0.00106822		4051.77	0.02901019
342	-0.00211894		871.99	0.01284588		1401.99	0.02589108		1931.99	0.02609436		2461.98	0.00459713		2991.98	0.00961219		3521.97	-0.00071252		4051.97	0.02865317
342.2	-0.00274382		872.19	0.0125499		1402.19	0.02575072		1932.19	0.0273525		2462.18	0.00320902		2992.18	0.0093911		3522.17	-0.00022929		4052.17	0.02885913
342.4	-0.00318319		872.39	0.0125984		1402.39	0.02615363		1932.39	0.02793002		2462.38	0.00304244		2992.38	0.00844388		3522.37	0.00041695		4052.37	0.02896144
342.6	-0.0029893		872.59	0.01368773		1402.59	0.02615175		1932.59	0.02844308		2462.58	0.00332889		2992.58	0.00772024		3522.57	0.00048205		4052.57	0.02916506
342.8	-0.00301888		872.79	0.01277512		1402.79	0.02665364		1932.79	0.02829228		2462.78	0.00351591		2992.78	0.00752844		3522.77	0.0012365		4052.77	0.02893748
343	-0.00349562		872.99	0.01275678		1402.99	0.02688387		1932.99	0.02729029		2462.98	0.00340791		2992.98	0.00788996		3522.97	0.00105107		4052.97	0.02907271
343.2	-0.00278799		873.19	0.01293515		1403.19	0.02746104		1933.19	0.02785501		2463.18	0.00409815		2993.18	0.00699322		3523.17	0.00057998		4053.17	0.02909142
343.4	-0.00274073		873.39	0.01164306		1403.39	0.02673705		1933.39	0.02715897		2463.38	0.00474949		2993.38	0.00661195		3523.37	0.00050408		4053.37	0.02915985
343.6	-0.00152316		873.59	0.01116316		1403.59	0.02692884		1933.59	0.0275113		2463.58	0.00465581		2993.58	0.00677081		3523.57	0.00006		4053.57	0.02958083
343.8	-0.00205518		873.79	0.00992436		1403.79	0.02758187		1933.79	0.02690742		2463.78	0.0040007		2993.78	0.00699606		3523.77	-0.0007014		4053.77	0.03033548
344	-0.00292225		873.99	0.00922663		1403.99	0.0268408		1933.99	0.02626204		2463.98	0.00436072		2993.98	0.00781567		3523.97	-0.00146698		4053.97	0.0310279
344.2	-0.00258059		874.19	0.00916966		1404.19	0.02694661		1934.19	0.0260024		2464.18	0.00430823		2994.18	0.00793892		3524.17	-0.00189377		4054.17	0.03161938
344.4	-0.00317858		874.39	0.00848963		1404.39	0.02695857		1934.39	0.02572607		2464.38	0.00390438		2994.38	0.00832836		3524.37	-0.00292504		4054.37	0.03220984
344.6	-0.00320927		874.59	0.00780184		1404.59	0.02711251		1934.59	0.0243714		2464.58	0.00421403		2994.58	0.00916629		3524.57	-0.00325497		4054.57	0.03288509
344.8	-0.00392406		874.79	0.00730708		1404.79	0.02580512		1934.79	0.02435697		2464.78	0.00391306		2994.78	0.00926888		3524.77	-0.00368093		4054.77	0.03339119
345	-0.00341488		874.99	0.0075124		1404.99	0.02492187		1934.99	0.02465136		2464.98	0.00401495		2994.98	0.01047466		3524.97	-0.00461689		4054.97	0.03352002
345.2	-0.0041203		875.19	0.00659424		1405.19	0.02487258		1935.19	0.02503094		2465.18	0.00470756		2995.18	0.01079237		3525.17	-0.00541335		4055.17	0.0330291
345.4	-0.00402428		875.39	0.00673934		1405.39	0.02521224		1935.39	0.02554368		2465.38	0.00550812		2995.38	0.01130415		3525.37	-0.00517255		4055.37	0.03315774
345.6	-0.00428636		875.59	0.00719061		1405.59	0.02484477		1935.59	0.02589675		2465.58	0.00500361		2995.58	0.0116449		3525.57	-0.00468908		4055.57	0.03299586
345.8	-0.00388413		875.79	0.00816628		1405.79	0.02441795		1935.79	0.02574789		2465.78	0.00467736		2995.78	0.01143671		3525.77	-0.00351471		4055.77	0.03318553
346	-0.0038688		875.99	0.00856342		1405.99	0.0244621		1935.99	0.02676576		2465.98	0.0043185		2995.98	0.01107101		3525.97	-0.00266105		4055.97	0.03289272
346.2	-0.00322791		876.19	0.0081176		1406.19	0.02494218		1936.19	0.02658278		2466.18	0.00379405		2996.18	0.01084365		3526.17	-0.00213639		4056.17	0.03306815
346.4	-0.00196334		876.39	0.00916689		1406.39	0.02564045		1936.39	0.02645905		2466.38	0.00428775		2996.38	0.01012557		3526.37	-0.00166049		4056.37	0.03371814
346.6	-0.00191989		876.59	0.00987561		1406.59	0.02553675		1936.59	0.0271555		2466.58	0.00422887		2996.58	0.00991297		3526.57	-0.00080191		4056.57	0.03295567
346.8	-0.0009666		876.79	0.00913181		1406.79	0.02525316		1936.79	0.02621862		2466.78	0.0044869		2996.78	0.01006834		3526.77	0.00008665		4056.77	0.03246031
347	-0.00103687		876.99	0.00974301		1406.99	0.02422176		1936.99	0.0262972		2466.98	0.0042319		2996.98	0.0101754		3526.97	0.00051553		4056.97	0.03217063
347.2	0.00019095		877.19	0.00984898		1407.19	0.02480815		1937.19	0.0264145		2467.18	0.00375775		2997.18	0.00982351		3527.17	0.00005289		4057.17	0.03176474
347.4	0.00018711		877.39	0.00980337		1407.39	0.02533784		1937.39	0.02614233		2467.38	0.00283179		2997.38	0.009874		3527.37	0.00082221		4057.37	0.03147939
347.6	0.00053144		877.59	0.00959792		1407.59	0.02694305		1937.59	0.02523386		2467.58	0.00285537		2997.58	0.00974014		3527.57	0.00143911		4057.57	0.03196573
347.8	-0.00035169		877.79	0.009202		1407.79	0.02748716		1937.79	0.02512186		2467.78	0.0025051		2997.78	0.00982536		3527.77	0.00171524		4057.77	0.03212781
348	-0.00118199		877.99	0.00901002		1407.99	0.02716045		1937.99	0.02462044		2467.98	0.0028033		2997.98	0.00957972		3527.97	0.00164956		4057.97	0.03162706
348.2	-0.00133761		878.19	0.00941418		1408.19	0.02751298		1938.19	0.02431215		2468.18	0.00282099		2998.18	0.00937151		3528.17	0.00039123		4058.17	0.03160971
348.4	-0.00212391		878.39	0.00893007		1408.39	0.02761419		1938.39	0.02433558		2468.38	0.00281136		2998.38	0.00994931		3528.37	-0.00064568		4058.37	0.03140121
348.6	-0.00163644		878.59	0.00900716		1408.59	0.02765461		1938.59	0.02410222		2468.58	0.00358154		2998.58	0.01070198		3528.57	-0.00152647		4058.57	0.03173441
348.8	-0.00261819		878.79	0.00943892		1408.79	0.02685874		1938.79	0.02377119		2468.78	0.00364328		2998.78	0.01049431		3528.77	-0.00126783		4058.77	0.031098
349	-0.00257299		878.99	0.01039111		1408.99	0.02698435		1938.99	0.02336023		2468.98	0.0052358		2998.98	0.01046255		3528.97	-0.00242188		4058.97	0.03097044
349.2	-0.00327982		879.19	0.01042876		1409.19	0.02713854		1939.19	0.02350636		2469.18	0.00592375		2999.18	0.00943883		3529.17	-0.00286654		4059.17	0.03021286
349.4	-0.00414649		879.39	0.01114875		1409.39	0.02755466		1939.39	0.02386729		2469.38	0.00622314		2999.38	0.00945317		3529.37	-0.0028043		4059.37	0.02995029
349.6	-0.00491432		879.59	0.01126657		1409.59	0.02754877		1939.59	0.02388873		2469.58	0.0066598		2999.58	0.00872423		3529.57	-0.00212192		4059.57	0.03009286
349.8	-0.00459143		879.79	0.01155268		1409.79	0.02749329		1939.79	0.02425606		2469.78	0.00739455		2999.78	0.0080564		3529.77	-0.00164114		4059.77	0.02992583
350	-0.00460232		879.99	0.01067651		1409.99	0.02804889		1939.99	0.02512557		2469.98	0.0075771		2999.98	0.00759292		3529.97	-0.00178433		4059.97	0.02970072
350.2	-0.00432189		880.19	0.00996587		1410.19	0.02838248		1940.19	0.02531112		2470.18	0.00735316		3000.18	0.00774378		3530.17	-0.00132728		4060.17	0.03080186
350.4	-0.0039665		880.39	0.01006512		1410.39	0.02850961		1940.39	0.0251292		2470.38	0.00747551		3000.38	0.0079606		3530.37	-0.00090261		4060.37	0.0310817
350.6	-0.00390878		880.59	0.00948119		1410.59	0.0287116		1940.59	0.02568182		2470.58	0.00572667		3000.58	0.00844463		3530.57	-0.00013702		4060.57	0.03088176
350.8	-0.00352438		880.79	0.00878785		1410.79	0.02887957		1940.79	0.02592746		2470.78	0.00579624		3000.78	0.00827101		3530.77	0.00021596		4060.77	0.03116086
351	-0.0037369		880.99	0.00845839		1410.99	0.02878982		1940.99	0.02555309		2470.98	0.00558343		3000.98	0.00848082		3530.97	0.00065552		4060.97	0.03139036
351.2	-0.00257203		881.19	0.00780826		1411.19	0.02983613		1941.19	0.02563307		2471.18	0.00521996		3001.18	0.00830499		3531.17	0.00031533		4061.17	0.03162414
351.4	-0.00246784		881.39	0.00722124		1411.39	0.03004534		1941.39	0.02617268		2471.38	0.00572087		3001.38	0.00803083		3531.37	0.00106788		4061.37	0.03223208
351.6	-0.00197916		881.59	0.00684198		1411.59	0.03077016		1941.59	0.02536911		2471.58	0.00541355		3001.58	0.00792835		3531.57	0.00166819		4061.57	0.03242009
351.8	-0.00177497		881.79	0.00696567		1411.79	0.03005771		1941.79	0.0261231		2471.78	0.00517998		3001.78	0.00919202		3531.77	0.00186519		4061.77	0.0326597
352	-0.00231		881.99	0.0082664		1411.99	0.02938061		1941.99	0.02520425		2471.98	0.00500073		3001.98	0.00937842		3531.97	0.00102587		4061.97	0.03189809
352.2	-0.00188577		882.19	0.00970206		1412.19	0.0289075		1942.19	0.02496977		2472.18	0.00569155		3002.18	0.00978717		3532.17	-0.00047778		4062.17	0.03165424
352.4	-0.00177139		882.39	0.01046792		1412.39	0.02788607		1942.39	0.02421422		2472.38	0.0059833		3002.38	0.01034241		3532.37	-0.0009382		4062.37	0.03172908
352.6	-0.00196707		882.59	0.01131721		1412.59	0.02783191		1942.59	0.02252774		2472.58	0.00608851		3002.58	0.01046744		3532.57	-0.00150516		4062.57	0.03283839
352.8	-0.00262543		882.79	0.01181835		1412.79	0.02704607		1942.79	0.0221405		2472.78	0.00614785		3002.78	0.00977844		3532.77	-0.00208407		4062.77	0.0327876
353	-0.00318145		882.99	0.01282603		1412.99	0.02668535		1942.99	0.02222713		2472.98	0.00673025		3002.98	0.00995689		3532.97	-0.0030759		4062.97	0.03284954
353.2	-0.00427717		883.19	0.01236912		1413.19	0.02588991		1943.19	0.02228351		2473.18	0.00701857		3003.18	0.00950218		3533.17	-0.0032371		4063.17	0.03201175
353.4	-0.0063437		883.39	0.01249457		1413.39	0.0253359		1943.39	0.02251728		2473.38	0.00696409		3003.38	0.01023651		3533.37	-0.00293471		4063.37	0.03199351
353.6	-0.00667676		883.59	0.01232231		1413.59	0.02495833		1943.59	0.02284638		2473.58	0.00806894		3003.58	0.01058389		3533.57	-0.00260377		4063.57	0.03185411
353.8	-0.00647383		883.79	0.01192922		1413.79	0.02470219		1943.79	0.02329682		2473.78	0.00774799		3003.78	0.01070359		3533.77	-0.0023751		4063.77	0.03202513
354	-0.0074538		883.99	0.01105155		1413.99	0.02462085		1943.99	0.02374896		2473.98	0.00840365		3003.98	0.01061746		3533.97	-0.00255678		4063.97	0.0324489
354.2	-0.00732493		884.19	0.01017494		1414.19	0.0251442		1944.19	0.02391917		2474.18	0.0078049		3004.18	0.01080778		3534.17	-0.00221963		4064.17	0.03363088
354.4	-0.0070256		884.39	0.00981201		1414.39	0.02537927		1944.39	0.02425933		2474.38	0.00735453		3004.38	0.01095417		3534.37	-0.00216864		4064.37	0.03416746
354.6	-0.00629485		884.59	0.00853044		1414.59	0.02608383		1944.59	0.02504287		2474.58	0.00669692		3004.58	0.01051191		3534.57	-0.0016809		4064.57	0.03521312
354.8	-0.00566195		884.79	0.00789258		1414.79	0.02541557		1944.79	0.02549366		2474.78	0.00778971		3004.78	0.00994492		3534.77	-0.00131503		4064.77	0.03582132
355	-0.00465164		884.99	0.00760852		1414.99	0.02516489		1944.99	0.02507713		2474.98	0.00764459		3004.98	0.00948581		3534.97	-0.00131529		4064.97	0.03669001
355.2	-0.00385303		885.19	0.006193		1415.19	0.02498846		1945.19	0.02515456		2475.18	0.00739809		3005.18	0.00881788		3535.17	-0.00123045		4065.17	0.03644456
355.4	-0.00328821		885.39	0.00547218		1415.39	0.02472424		1945.39	0.02532539		2475.38	0.00678815		3005.38	0.00917212		3535.37	-0.00096402		4065.37	0.03578199
355.6	-0.00197514		885.59	0.00565959		1415.59	0.0248114		1945.59	0.02497494		2475.58	0.00534182		3005.58	0.0096907		3535.57	-0.00064574		4065.57	0.03509015
355.8	-0.00152916		885.79	0.00600779		1415.79	0.02497629		1945.79	0.02489732		2475.78	0.00527314		3005.78	0.01051217		3535.77	-0.00063205		4065.77	0.03523108
356	-0.00049427		885.99	0.00628214		1415.99	0.02443143		1945.99	0.02389667		2475.98	0.00511478		3005.98	0.01042192		3535.97	-0.0009542		4065.97	0.03401193
356.2	0.0004827		886.19	0.00683605		1416.19	0.02544609		1946.19	0.02338782		2476.18	0.00595323		3006.18	0.01045139		3536.17	-0.00127308		4066.17	0.03400198
356.4	0.00061765		886.39	0.0068224		1416.39	0.026483		1946.39	0.02302235		2476.38	0.00533396		3006.38	0.01018675		3536.37	-0.00135144		4066.37	0.03437333
356.6	0.00058506		886.59	0.00723857		1416.59	0.02745807		1946.59	0.02355699		2476.58	0.00485937		3006.58	0.01132647		3536.57	-0.00129605		4066.57	0.03464606
356.8	0.00060492		886.79	0.00725114		1416.79	0.02808496		1946.79	0.02404677		2476.78	0.00462511		3006.78	0.01207033		3536.77	-0.00121214		4066.77	0.03440644
357	-0.00100362		886.99	0.00785221		1416.99	0.02828374		1946.99	0.02399632		2476.98	0.00470192		3006.98	0.01237721		3536.97	-0.0009735		4066.97	0.03455652
357.2	-0.00214019		887.19	0.00816787		1417.19	0.02806495		1947.19	0.02459805		2477.18	0.00517448		3007.18	0.01203857		3537.17	-0.00007799		4067.17	0.0345229
357.4	-0.00338146		887.39	0.00922131		1417.39	0.02855351		1947.39	0.02561466		2477.38	0.00572492		3007.38	0.01261903		3537.37	0.00048564		4067.37	0.03494064
357.6	-0.00378936		887.59	0.00952904		1417.59	0.02886826		1947.59	0.02630246		2477.58	0.00655541		3007.58	0.01275037		3537.57	0.00073182		4067.57	0.03486856
357.8	-0.00443885		887.79	0.01065213		1417.79	0.02882952		1947.79	0.02738213		2477.78	0.00579748		3007.78	0.01168275		3537.77	0.00134948		4067.77	0.03593495
358	-0.00440289		887.99	0.01109922		1417.99	0.02842843		1947.99	0.0282366		2477.98	0.00644541		3007.98	0.01184868		3537.97	0.00067393		4067.97	0.035557
358.2	-0.00434171		888.19	0.0116762		1418.19	0.02871006		1948.19	0.02826475		2478.18	0.00619238		3008.18	0.0114684		3538.17	0.00074526		4068.17	0.03620868
358.4	-0.00395918		888.39	0.01204598		1418.39	0.02823405		1948.39	0.02828969		2478.38	0.00583544		3008.38	0.01116712		3538.37	-0.00015781		4068.37	0.03705181
358.6	-0.00347382		888.59	0.01188156		1418.59	0.0276198		1948.59	0.02833591		2478.58	0.00676437		3008.58	0.01009614		3538.57	-0.00012113		4068.57	0.03675708
358.8	-0.00309186		888.79	0.01138774		1418.79	0.02634373		1948.79	0.02769767		2478.78	0.00680088		3008.78	0.00989834		3538.77	-0.00035685		4068.77	0.03658628
359	-0.0020697		888.99	0.01133734		1418.99	0.02649642		1948.99	0.02688716		2478.98	0.00634955		3008.98	0.00967083		3538.97	-0.00107284		4068.97	0.03512459
359.2	-0.00122234		889.19	0.01008829		1419.19	0.0252846		1949.19	0.02605451		2479.18	0.00654325		3009.18	0.00961931		3539.17	-0.00145653		4069.17	0.03331729
359.4	-0.0001545		889.39	0.00934218		1419.39	0.02433577		1949.39	0.02572407		2479.38	0.00587642		3009.38	0.00994252		3539.37	-0.0012559		4069.37	0.0329162
359.6	0.00052237		889.59	0.00861995		1419.59	0.02375435		1949.59	0.02360367		2479.58	0.00563774		3009.58	0.0098903		3539.57	-0.00111277		4069.57	0.03256502
359.8	0.00091871		889.79	0.00851019		1419.79	0.02433495		1949.79	0.02301148		2479.78	0.00564013		3009.78	0.01006157		3539.77	-0.00194624		4069.77	0.0319967
360	0.0022584		889.99	0.00851416		1419.99	0.02391503		1949.99	0.02247601		2479.98	0.00587374		3009.98	0.00934039		3539.97	-0.00224047		4069.97	0.03078359
360.2	0.0017545		890.19	0.00885766		1420.19	0.02433431		1950.19	0.02183711		2480.18	0.00621583		3010.18	0.0083334		3540.17	-0.00242143		4070.17	0.03088294
360.4	0.0024243		890.39	0.00842127		1420.39	0.02464612		1950.39	0.02112393		2480.38	0.00535751		3010.38	0.0091056		3540.37	-0.00246031		4070.37	0.03135205
360.6	0.00216788		890.59	0.00809845		1420.59	0.02479772		1950.59	0.02053365		2480.58	0.00510422		3010.58	0.00996457		3540.57	-0.00233882		4070.57	0.03242287
360.8	0.00120619		890.79	0.00809173		1420.79	0.0252208		1950.79	0.01991357		2480.78	0.00541365		3010.78	0.0103336		3540.77	-0.00230059		4070.77	0.03364217
361	0.00029023		890.99	0.00798928		1420.99	0.02487248		1950.99	0.02091708		2480.98	0.00529409		3010.98	0.01047501		3540.97	-0.00186031		4070.97	0.03451329
361.2	-0.00048018		891.19	0.00845352		1421.19	0.02541793		1951.19	0.02174352		2481.18	0.00578304		3011.18	0.01016571		3541.17	-0.00090749		4071.17	0.0347886
361.4	-0.00081447		891.39	0.00901388		1421.39	0.02592247		1951.39	0.02268207		2481.38	0.00563181		3011.38	0.01133146		3541.37	-0.00048443		4071.37	0.03503837
361.6	-0.00106335		891.59	0.00878366		1421.59	0.02555259		1951.59	0.02324395		2481.58	0.00609917		3011.58	0.01144317		3541.57	-0.00024276		4071.57	0.03534759
361.8	-0.00191313		891.79	0.00995938		1421.79	0.02579125		1951.79	0.02422389		2481.78	0.00612295		3011.78	0.01212359		3541.77	0.00019507		4071.77	0.03612139
362	-0.00144832		891.99	0.00928947		1421.99	0.02640477		1951.99	0.0242208		2481.98	0.00641688		3011.98	0.01235527		3541.97	0.00004885		4071.97	0.03569668
362.2	-0.001724		892.19	0.00995745		1422.19	0.02745564		1952.19	0.02426589		2482.18	0.00632899		3012.18	0.01163674		3542.17	0.00080667		4072.17	0.03671178
362.4	-0.00196539		892.39	0.0092936		1422.39	0.02764934		1952.39	0.02448315		2482.38	0.00543096		3012.38	0.01169106		3542.37	0.00071897		4072.37	0.03683158
362.6	-0.00153833		892.59	0.00854936		1422.59	0.02792287		1952.59	0.02480872		2482.58	0.00616244		3012.58	0.01053982		3542.57	0.00205877		4072.57	0.03566466
362.8	-0.00103861		892.79	0.00812726		1422.79	0.02851678		1952.79	0.02443495		2482.78	0.00606293		3012.78	0.01071136		3542.77	0.00274574		4072.77	0.03568078
363	-0.00016503		892.99	0.00767107		1422.99	0.02814112		1952.99	0.02482516		2482.98	0.00611041		3012.98	0.01056739		3542.97	0.00302294		4072.97	0.03411257
363.2	-0.00114059		893.19	0.00610083		1423.19	0.02732865		1953.19	0.02455993		2483.18	0.00664898		3013.18	0.01010439		3543.17	0.0033392		4073.17	0.03454269
363.4	-0.00124627		893.39	0.00538355		1423.39	0.02761425		1953.39	0.02399523		2483.38	0.00575582		3013.38	0.00989547		3543.37	0.00331108		4073.37	0.03582698
363.6	-0.0018894		893.59	0.00575161		1423.59	0.02790947		1953.59	0.02343686		2483.58	0.00476168		3013.58	0.01013231		3543.57	0.00226074		4073.57	0.0355394
363.8	-0.00254407		893.79	0.00635701		1423.79	0.0284106		1953.79	0.0249029		2483.78	0.00451657		3013.78	0.01009028		3543.77	0.00142741		4073.77	0.03567618
364	-0.00246317		893.99	0.00632315		1423.99	0.02839665		1953.99	0.02465923		2483.98	0.00472454		3013.98	0.00937695		3543.97	0.00088297		4073.97	0.03646992
364.2	-0.00205229		894.19	0.00698314		1424.19	0.02769524		1954.19	0.02490174		2484.18	0.00450886		3014.18	0.00960246		3544.17	0.00043831		4074.17	0.03765075
364.4	-0.00234974		894.39	0.0073653		1424.39	0.02744406		1954.39	0.02502597		2484.38	0.00483315		3014.38	0.01057707		3544.37	0.00007001		4074.37	0.03783296
364.6	-0.0032356		894.59	0.00772821		1424.59	0.0270436		1954.59	0.02514687		2484.58	0.00496902		3014.58	0.01036988		3544.57	0.00004066		4074.57	0.03796003
364.8	-0.00357705		894.79	0.00916172		1424.79	0.02732936		1954.79	0.02570126		2484.78	0.00573067		3014.78	0.01154834		3544.77	0.00002065		4074.77	0.03819481
365	-0.00365858		894.99	0.01031654		1424.99	0.02727328		1954.99	0.02588925		2484.98	0.0050778		3014.98	0.01228359		3544.97	-0.00025502		4074.97	0.03841246
365.2	-0.00384402		895.19	0.01150833		1425.19	0.02770126		1955.19	0.0261113		2485.18	0.00539637		3015.18	0.01260944		3545.17	-0.00070095		4075.17	0.03754019
365.4	-0.00329499		895.39	0.01283911		1425.39	0.02714539		1955.39	0.02661642		2485.38	0.00544112		3015.38	0.01355702		3545.37	-0.00123409		4075.37	0.03853466
365.6	-0.00347843		895.59	0.01322197		1425.59	0.02641128		1955.59	0.02647191		2485.58	0.00604495		3015.58	0.01362305		3545.57	-0.00196477		4075.57	0.03940112
365.8	-0.0040374		895.79	0.01458546		1425.79	0.02624068		1955.79	0.02647076		2485.78	0.00561433		3015.78	0.01430998		3545.77	-0.00152637		4075.77	0.03915179
366	-0.00336824		895.99	0.01357669		1425.99	0.02661429		1955.99	0.02637281		2485.98	0.00517434		3015.98	0.01403128		3545.97	-0.00073179		4075.97	0.03914453
366.2	-0.00270215		896.19	0.01430123		1426.19	0.02688697		1956.19	0.02708303		2486.18	0.00499759		3016.18	0.01418844		3546.17	-0.00007213		4076.17	0.03966835
366.4	-0.00222612		896.39	0.01310955		1426.39	0.02666136		1956.39	0.0273863		2486.38	0.00486928		3016.38	0.01422515		3546.37	0.00064963		4076.37	0.0387074
366.6	-0.00095661		896.59	0.01264483		1426.59	0.02726854		1956.59	0.02647718		2486.58	0.00510892		3016.58	0.01289595		3546.57	0.00153523		4076.57	0.03823549
366.8	-0.00170447		896.79	0.01230731		1426.79	0.02742528		1956.79	0.02622894		2486.78	0.00496805		3016.78	0.01344424		3546.77	0.00220974		4076.77	0.03768748
367	-0.00149766		896.99	0.01029357		1426.99	0.02678097		1956.99	0.02576623		2486.98	0.00477637		3016.98	0.01296728		3546.97	0.00210811		4076.97	0.03731572
367.2	-0.00208204		897.19	0.00950456		1427.19	0.02714398		1957.19	0.02428642		2487.18	0.0052672		3017.18	0.01203238		3547.17	0.00211564		4077.17	0.03799862
367.4	-0.00091931		897.39	0.00879432		1427.39	0.02758183		1957.39	0.0233039		2487.38	0.00456938		3017.38	0.01225762		3547.37	0.00160414		4077.37	0.03785978
367.6	-0.00170953		897.59	0.00832103		1427.59	0.02773852		1957.59	0.02379805		2487.58	0.00456343		3017.58	0.01244948		3547.57	0.00132347		4077.57	0.03710096
367.8	-0.00237248		897.79	0.00761102		1427.79	0.02780021		1957.79	0.02379958		2487.78	0.00548927		3017.78	0.0119245		3547.77	0.00162623		4077.77	0.0369453
368	-0.00147467		897.99	0.00737543		1427.99	0.02819516		1957.99	0.02449411		2487.98	0.00596864		3017.98	0.01206092		3547.97	0.00126301		4077.97	0.03638671
368.2	-0.0013918		898.19	0.00660691		1428.19	0.02772864		1958.19	0.02472679		2488.18	0.00622645		3018.18	0.01143261		3548.17	0.00185006		4078.17	0.03523403
368.4	-0.00238189		898.39	0.00659465		1428.39	0.02772938		1958.39	0.02506852		2488.38	0.007268		3018.38	0.0108866		3548.37	0.00163728		4078.37	0.03413723
368.6	-0.00226803		898.59	0.00710347		1428.59	0.02805656		1958.59	0.02514389		2488.58	0.00742953		3018.58	0.00951838		3548.57	0.00186302		4078.57	0.03359427
368.8	-0.00246158		898.79	0.00845462		1428.79	0.02923418		1958.79	0.02557334		2488.78	0.00781241		3018.78	0.00919291		3548.77	0.00169371		4078.77	0.03431127
369	-0.00324656		898.99	0.00931899		1428.99	0.02889487		1958.99	0.02578995		2488.98	0.00700579		3018.98	0.00853774		3548.97	0.00097081		4078.97	0.03493341
369.2	-0.0029799		899.19	0.0101014		1429.19	0.02897398		1959.19	0.02640292		2489.18	0.00675877		3019.18	0.00789928		3549.17	0.00015475		4079.17	0.03510023
369.4	-0.00271948		899.39	0.0111292		1429.39	0.02840077		1959.39	0.0267756		2489.38	0.00577596		3019.38	0.00750641		3549.37	-0.00068664		4079.37	0.03666197
369.6	-0.00239102		899.59	0.01089284		1429.59	0.02837083		1959.59	0.02642219		2489.58	0.00575086		3019.58	0.00775077		3549.57	-0.00071384		4079.57	0.03750871
369.8	-0.00161146		899.79	0.01091397		1429.79	0.02844252		1959.79	0.02703526		2489.78	0.00524189		3019.78	0.00714888		3549.77	-0.00010196		4079.77	0.0373962
370	-0.0007513		899.99	0.01064899		1429.99	0.02901448		1959.99	0.02822294		2489.98	0.00466672		3019.98	0.00700908		3549.97	0.00044856		4079.97	0.03770751
370.2	0.00000794		900.19	0.01100626		1430.19	0.02914315		1960.19	0.02843002		2490.18	0.00420423		3020.18	0.00659501		3550.17	0.00038776		4080.17	0.03773516
370.4	0.00076611		900.39	0.01032241		1430.39	0.02922468		1960.39	0.02858371		2490.38	0.00432513		3020.38	0.00613518		3550.37	-0.00000293		4080.37	0.03741433
370.6	0.00107561		900.59	0.01043485		1430.59	0.02977977		1960.59	0.0281063		2490.58	0.00339806		3020.58	0.00625187		3550.57	-0.00040129		4080.57	0.037613
370.8	0.00070878		900.79	0.01079608		1430.79	0.02964257		1960.79	0.02864181		2490.78	0.00321435		3020.78	0.00690441		3550.77	-0.00006289		4080.77	0.03804658
371	0.00186224		900.99	0.00966249		1430.99	0.02975139		1960.99	0.02784242		2490.98	0.00417031		3020.98	0.0072302		3550.97	-0.00040704		4080.97	0.03858479
371.2	0.00242317		901.19	0.00979757		1431.19	0.0295621		1961.19	0.02696985		2491.18	0.00493993		3021.18	0.00808749		3551.17	-0.00025734		4081.17	0.03834154
371.4	0.00288356		901.39	0.00894885		1431.39	0.02915204		1961.39	0.02646644		2491.38	0.00481453		3021.38	0.0104313		3551.37	-0.00046961		4081.37	0.03859394
371.6	0.00170191		901.59	0.0084405		1431.59	0.0287431		1961.59	0.02659074		2491.58	0.00443433		3021.58	0.01133888		3551.57	0.00067849		4081.57	0.03895751
371.8	0.00158541		901.79	0.008468		1431.79	0.02939235		1961.79	0.02684825		2491.78	0.00526782		3021.78	0.01181865		3551.77	0.00162295		4081.77	0.03840198
372	0.00181472		901.99	0.00786045		1431.99	0.02939844		1961.99	0.02799886		2491.98	0.00561863		3021.98	0.01177558		3551.97	0.00238101		4081.97	0.03783183
372.2	0.00061216		902.19	0.006732		1432.19	0.02897074		1962.19	0.02796836		2492.18	0.00583525		3022.18	0.01156468		3552.17	0.00219542		4082.17	0.03747935
372.4	-0.00019514		902.39	0.00704594		1432.39	0.02893637		1962.39	0.02869317		2492.38	0.00649688		3022.38	0.01252302		3552.37	0.00199457		4082.37	0.03710172
372.6	-0.00081101		902.59	0.00751199		1432.59	0.02897271		1962.59	0.02950057		2492.58	0.00657162		3022.58	0.01193353		3552.57	0.00218193		4082.57	0.03727316
372.8	-0.00239615		902.79	0.00780613		1432.79	0.02970801		1962.79	0.02937693		2492.78	0.00690807		3022.78	0.01225835		3552.77	0.00182313		4082.77	0.03785932
373	-0.0028212		902.99	0.0086278		1432.99	0.02898042		1962.99	0.029071		2492.98	0.00621181		3022.98	0.01285845		3552.97	0.00136721		4082.97	0.03772546
373.2	-0.00299993		903.19	0.00928989		1433.19	0.0290585		1963.19	0.02880299		2493.18	0.00628339		3023.18	0.01257952		3553.17	-0.00003961		4083.17	0.03802514
373.4	-0.00258868		903.39	0.00924231		1433.39	0.02962846		1963.39	0.02854531		2493.38	0.00596774		3023.38	0.011943		3553.37	-0.0002863		4083.37	0.03895174
373.6	-0.00240037		903.59	0.00882806		1433.59	0.02987863		1963.59	0.02827228		2493.58	0.00646256		3023.58	0.01157807		3553.57	-0.00070201		4083.57	0.03957485
373.8	-0.00263246		903.79	0.00959148		1433.79	0.02985498		1963.79	0.02863641		2493.78	0.00663856		3023.78	0.01077242		3553.77	-0.0005392		4083.77	0.03934715
374	-0.00344086		903.99	0.01034763		1433.99	0.02995072		1963.99	0.02868854		2493.98	0.00658149		3023.98	0.01029987		3553.97	-0.00027479		4083.97	0.04021041
374.2	-0.0038279		904.19	0.01033338		1434.19	0.02989468		1964.19	0.02802784		2494.18	0.00682651		3024.18	0.01022099		3554.17	-0.00129286		4084.17	0.04143171
374.4	-0.0038135		904.39	0.01019175		1434.39	0.02987231		1964.39	0.02822394		2494.38	0.00696522		3024.38	0.00965247		3554.37	-0.0015335		4084.37	0.04171319
374.6	-0.00384034		904.59	0.010595		1434.59	0.03007741		1964.59	0.02800315		2494.58	0.00587794		3024.58	0.00973077		3554.57	-0.00186683		4084.57	0.04169241
374.8	-0.0040452		904.79	0.01045368		1434.79	0.03043793		1964.79	0.02803254		2494.78	0.00640483		3024.78	0.00977145		3554.77	-0.00177305		4084.77	0.04231242
375	-0.00306556		904.99	0.00891481		1434.99	0.03029474		1964.99	0.0277167		2494.98	0.00636539		3024.98	0.00997182		3554.97	-0.00096793		4084.97	0.04166091
375.2	-0.00306521		905.19	0.0087266		1435.19	0.02948905		1965.19	0.02754611		2495.18	0.00586862		3025.18	0.01071393		3555.17	-0.00027518		4085.17	0.04137803
375.4	-0.00367004		905.39	0.00837705		1435.39	0.02856512		1965.39	0.02707785		2495.38	0.00538408		3025.38	0.01104081		3555.37	0.00062823		4085.37	0.04180744
375.6	-0.00480012		905.59	0.00822213		1435.59	0.02876191		1965.59	0.02719776		2495.58	0.00498995		3025.58	0.01091725		3555.57	0.00098312		4085.57	0.04180924
375.8	-0.00430384		905.79	0.00843862		1435.79	0.02956865		1965.79	0.0277077		2495.78	0.00555904		3025.78	0.01041404		3555.77	0.00109934		4085.77	0.04082469
376	-0.00444881		905.99	0.00804367		1435.99	0.02899332		1965.99	0.02822682		2495.98	0.00567354		3025.98	0.00965409		3555.97	0.00089883		4085.97	0.04116142
376.2	-0.00450907		906.19	0.00786204		1436.19	0.02838744		1966.19	0.02938672		2496.18	0.0055399		3026.18	0.01070862		3556.17	0.00061386		4086.17	0.0412154
376.4	-0.00460582		906.39	0.00818889		1436.39	0.02875651		1966.39	0.03011719		2496.38	0.00532962		3026.38	0.01050999		3556.37	0.00099407		4086.37	0.04073583
376.6	-0.00474917		906.59	0.00945451		1436.59	0.02766702		1966.59	0.03078061		2496.58	0.00486479		3026.58	0.0097978		3556.57	0.00129666		4086.57	0.04139632
376.8	-0.00483366		906.79	0.00950208		1436.79	0.02747105		1966.79	0.02987769		2496.78	0.00483698		3026.78	0.00994768		3556.77	0.00086365		4086.77	0.04207169
377	-0.00450317		906.99	0.01047659		1436.99	0.02697562		1966.99	0.02960567		2496.98	0.00450981		3026.98	0.00992636		3556.97	0.00104921		4086.97	0.04228823
377.2	-0.00411346		907.19	0.01041523		1437.19	0.02776099		1967.19	0.02937776		2497.18	0.00498769		3027.18	0.00916717		3557.17	0.0011901		4087.17	0.04246057
377.4	-0.00312828		907.39	0.01018323		1437.39	0.02871091		1967.39	0.02886869		2497.38	0.00463747		3027.38	0.00941304		3557.37	0.00186473		4087.37	0.04304837
377.6	-0.0033382		907.59	0.01046987		1437.59	0.02833295		1967.59	0.0293904		2497.58	0.00494607		3027.58	0.00943278		3557.57	0.00201029		4087.57	0.04288189
377.8	-0.00340006		907.79	0.01077461		1437.79	0.02883442		1967.79	0.02913397		2497.78	0.00584803		3027.78	0.01016181		3557.77	0.00248326		4087.77	0.042943
378	-0.0034141		907.99	0.01050913		1437.99	0.02937588		1967.99	0.02859438		2497.98	0.00593815		3027.98	0.01070602		3557.97	0.00227634		4087.97	0.04357466
378.2	-0.00289784		908.19	0.01006151		1438.19	0.02984768		1968.19	0.02785884		2498.18	0.00605204		3028.18	0.01150214		3558.17	0.00189554		4088.17	0.04362168
378.4	-0.00227676		908.39	0.00950708		1438.39	0.03028916		1968.39	0.02738317		2498.38	0.00586455		3028.38	0.011463		3558.37	0.0022652		4088.37	0.04306612
378.6	-0.00145972		908.59	0.00929554		1438.59	0.03095727		1968.59	0.02701087		2498.58	0.00580356		3028.58	0.01210065		3558.57	0.00194595		4088.57	0.04302802
378.8	-0.00064828		908.79	0.00881904		1438.79	0.03144161		1968.79	0.02675224		2498.78	0.00615155		3028.78	0.01285549		3558.77	0.0026357		4088.77	0.04328733
379	0.00050307		908.99	0.00875615		1438.99	0.03133723		1968.99	0.02630325		2498.98	0.00545367		3028.98	0.01329624		3558.97	0.00347442		4088.97	0.04325513
379.2	0.00068121		909.19	0.00944581		1439.19	0.03152608		1969.19	0.02564893		2499.18	0.00577051		3029.18	0.01387281		3559.17	0.0033286		4089.17	0.04363607
379.4	0.00135676		909.39	0.01017062		1439.39	0.03184677		1969.39	0.02505282		2499.38	0.00578243		3029.38	0.01391045		3559.37	0.00336531		4089.37	0.04449149
379.6	0.00205692		909.59	0.01095752		1439.59	0.03249852		1969.59	0.02481645		2499.58	0.00544747		3029.58	0.01411914		3559.57	0.00279124		4089.57	0.04532597
379.8	0.00349619		909.79	0.0118326		1439.79	0.03303517		1969.79	0.02453521		2499.78	0.00530955		3029.78	0.01367108		3559.77	0.00331177		4089.77	0.04608576
380	0.00349619		909.99	0.0118326		1439.99	0.03303517		1969.98	0.02453521		2499.98	0.00530955		3029.97	0.01367108		3559.97	0.00331177		4089.97	0.04608576
380.2	0.00393636		910.19	0.01064861		1440.19	0.03314007		1970.18	0.0243238		2500.18	0.0063334		3030.17	0.01352108		3560.17	0.00356148		4090.17	0.04568822
380.4	0.00439035		910.39	0.01060951		1440.39	0.03395096		1970.38	0.02500339		2500.38	0.00687901		3030.37	0.01402397		3560.37	0.00400966		4090.37	0.04540805
380.6	0.00384954		910.59	0.00923753		1440.59	0.03470552		1970.58	0.02570315		2500.58	0.00763078		3030.57	0.01425251		3560.57	0.00418055		4090.57	0.04552246
380.8	0.00397877		910.79	0.00795211		1440.79	0.03469815		1970.78	0.02732812		2500.78	0.00798789		3030.77	0.01542234		3560.77	0.00465457		4090.77	0.04580906
381	0.00320952		910.99	0.00723262		1440.99	0.03476341		1970.98	0.02798519		2500.98	0.00804753		3030.97	0.01607935		3560.97	0.00550154		4090.97	0.04545472
381.2	0.00255783		911.19	0.00683603		1441.19	0.03526066		1971.18	0.02850495		2501.18	0.00887708		3031.17	0.01614813		3561.17	0.00558594		4091.17	0.04508168
381.4	0.00153213		911.39	0.00672846		1441.39	0.03465445		1971.38	0.02940192		2501.38	0.00917263		3031.37	0.01660313		3561.37	0.00598165		4091.37	0.04530626
381.6	0.00063526		911.59	0.0062683		1441.59	0.03515614		1971.58	0.02984803		2501.58	0.00916094		3031.57	0.01682446		3561.57	0.00616075		4091.57	0.0456328
381.8	-0.00015672		911.79	0.00589313		1441.79	0.03547207		1971.78	0.03022613		2501.78	0.00861599		3031.77	0.01759096		3561.77	0.00662464		4091.77	0.0466492
382	-0.00099247		911.99	0.00557298		1441.99	0.03525662		1971.98	0.03101872		2501.98	0.00838402		3031.97	0.01784746		3561.97	0.00668817		4091.97	0.04708919
382.2	-0.00295326		912.19	0.00549148		1442.19	0.03576256		1972.18	0.03170876		2502.18	0.00833243		3032.17	0.01822777		3562.17	0.00622349		4092.17	0.04793403
382.4	-0.00417115		912.39	0.00529373		1442.39	0.03475906		1972.38	0.03065121		2502.38	0.00769029		3032.37	0.01736631		3562.37	0.00681591		4092.37	0.04857136
382.6	-0.00528756		912.59	0.00543778		1442.59	0.03424018		1972.58	0.03061541		2502.58	0.00708545		3032.57	0.01742455		3562.57	0.00681806		4092.57	0.04916671
382.8	-0.00500484		912.79	0.00653453		1442.79	0.03395655		1972.78	0.03109321		2502.78	0.00712962		3032.77	0.01731265		3562.77	0.00671385		4092.77	0.05048418
383	-0.00499392		912.99	0.00609385		1442.99	0.03458947		1972.98	0.03145432		2502.98	0.00701016		3032.97	0.01776207		3562.97	0.00692787		4092.97	0.05128848
383.2	-0.00437102		913.19	0.00658116		1443.19	0.03396997		1973.18	0.03105107		2503.18	0.00694525		3033.17	0.01828905		3563.17	0.00710014		4093.17	0.05245469
383.4	-0.00301079		913.39	0.00587753		1443.39	0.03428899		1973.38	0.03124851		2503.38	0.00735789		3033.37	0.01903816		3563.37	0.00720589		4093.37	0.05258606
383.6	-0.00214178		913.59	0.00550269		1443.59	0.03375548		1973.58	0.03074963		2503.58	0.00701142		3033.57	0.01991687		3563.57	0.0068684		4093.57	0.0523579
383.8	-0.00162894		913.79	0.00483152		1443.79	0.03302098		1973.78	0.03015986		2503.78	0.00572999		3033.77	0.01999172		3563.77	0.00731882		4093.77	0.05191783
384	-0.00112486		913.99	0.00485842		1443.99	0.03265016		1973.98	0.03050494		2503.98	0.00655064		3033.97	0.01931919		3563.97	0.00770256		4093.97	0.05173073
384.2	-0.00037178		914.19	0.00500085		1444.19	0.033155		1974.18	0.02953516		2504.18	0.00701915		3034.17	0.01900841		3564.17	0.00769754		4094.17	0.05137105
384.4	0.00008851		914.39	0.00546942		1444.39	0.0335832		1974.38	0.02975482		2504.38	0.00672133		3034.37	0.01927733		3564.37	0.00829313		4094.37	0.05151444
384.6	0.00020344		914.59	0.00472948		1444.59	0.03258753		1974.58	0.03015586		2504.58	0.00620353		3034.57	0.01878864		3564.57	0.00834385		4094.57	0.0514092
384.8	0.0007505		914.79	0.00420194		1444.79	0.03195756		1974.78	0.03063576		2504.78	0.00658984		3034.77	0.01887882		3564.77	0.00867195		4094.77	0.05034673
385	0.00046461		914.99	0.00531561		1444.99	0.03170176		1974.98	0.0299142		2504.98	0.00683271		3034.97	0.01769995		3564.97	0.00877624		4094.97	0.04885527
385.2	0.0008138		915.19	0.00548766		1445.19	0.03177259		1975.18	0.02981337		2505.18	0.00779452		3035.17	0.01676694		3565.17	0.0085947		4095.17	0.04852598
385.4	0.00132673		915.39	0.00582599		1445.39	0.03074573		1975.38	0.03088519		2505.38	0.00810312		3035.37	0.0165078		3565.37	0.00914303		4095.37	0.04794368
385.6	0.00148259		915.59	0.00527073		1445.59	0.0313231		1975.58	0.03125743		2505.58	0.00758764		3035.57	0.01628985		3565.57	0.00910641		4095.57	0.04800123
385.8	0.00141439		915.79	0.00494198		1445.79	0.03151617		1975.78	0.0321477		2505.78	0.00850162		3035.77	0.01621084		3565.77	0.00956771		4095.77	0.04822534
386	0.00131128		915.99	0.00461851		1445.99	0.03205185		1975.98	0.03270768		2505.98	0.00904183		3035.97	0.01532861		3565.97	0.00944659		4095.97	0.04847093
386.2	-0.00018964		916.19	0.00472124		1446.19	0.03272998		1976.18	0.03375179		2506.18	0.00899584		3036.17	0.01601545		3566.17	0.00902794		4096.17	0.04915572
386.4	-0.00004059		916.39	0.00487307		1446.39	0.03248481		1976.38	0.03385342		2506.38	0.00832672		3036.37	0.01547173		3566.37	0.00814138		4096.37	0.049523
386.6	0.00022729		916.59	0.00555477		1446.59	0.03174931		1976.58	0.0344001		2506.58	0.007481		3036.57	0.01623798		3566.57	0.00780291		4096.57	0.05020508
386.8	0.00065927		916.79	0.00565626		1446.79	0.03187688		1976.78	0.0351689		2506.78	0.00711079		3036.77	0.01634392		3566.77	0.00706377		4096.77	0.05148955
387	0.00050648		916.99	0.00500953		1446.99	0.03245395		1976.98	0.03592992		2506.98	0.00620779		3036.97	0.01704204		3566.97	0.00678592		4096.97	0.05206992
387.2	0.00045414		917.19	0.00498469		1447.19	0.03276503		1977.18	0.03572386		2507.18	0.0063522		3037.17	0.01814795		3567.17	0.00613255		4097.17	0.05205856
387.4	0.0010022		917.39	0.00467853		1447.39	0.03332413		1977.38	0.03655571		2507.38	0.00654261		3037.37	0.0192448		3567.37	0.00574661		4097.37	0.0515227
387.6	0.00039343		917.59	0.00443294		1447.59	0.03276384		1977.58	0.0360352		2507.58	0.00599795		3037.57	0.01951869		3567.57	0.00559045		4097.57	0.05184783
387.8	-0.00015002		917.79	0.00366111		1447.79	0.03255742		1977.78	0.03582255		2507.78	0.0066553		3037.77	0.01938635		3567.77	0.00594024		4097.77	0.05155547
388	-0.00028862		917.99	0.00316116		1447.99	0.03311483		1977.98	0.03477917		2507.98	0.0076442		3037.97	0.01939903		3567.97	0.00612462		4097.97	0.05144597
388.2	-0.0005094		918.19	0.00289637		1448.19	0.03365925		1978.18	0.03362157		2508.18	0.00746868		3038.17	0.01987401		3568.17	0.00654784		4098.17	0.05217199
388.4	-0.00116742		918.39	0.00273563		1448.39	0.0334017		1978.38	0.03292656		2508.38	0.0072421		3038.37	0.02030611		3568.37	0.00704914		4098.37	0.05213878
388.6	-0.00168418		918.59	0.00259168		1448.59	0.03343706		1978.58	0.03277687		2508.58	0.007582		3038.57	0.02029837		3568.57	0.00711257		4098.57	0.05126034
388.8	-0.00300509		918.79	0.00259666		1448.79	0.03429223		1978.78	0.03180945		2508.78	0.00872088		3038.77	0.01973737		3568.77	0.00748637		4098.77	0.05108854
389	-0.00279609		918.99	0.00412046		1448.99	0.0342199		1978.98	0.03142178		2508.98	0.00884115		3038.97	0.01906644		3568.97	0.00780911		4098.97	0.05092332
389.2	-0.00330087		919.19	0.00312958		1449.19	0.03480804		1979.18	0.03156982		2509.18	0.00881173		3039.17	0.01876145		3569.17	0.00844665		4099.17	0.05025463
389.4	-0.00284312		919.39	0.00348919		1449.39	0.0350728		1979.38	0.0319107		2509.38	0.0087537		3039.37	0.01824503		3569.37	0.00787755		4099.37	0.04929842
389.6	-0.00301745		919.59	0.00371244		1449.59	0.03617623		1979.58	0.03078144		2509.58	0.00833095		3039.57	0.01851712		3569.57	0.0083274		4099.57	0.05040213
389.8	-0.00291637		919.79	0.00424083		1449.79	0.03625842		1979.78	0.03059836		2509.78	0.00865096		3039.77	0.01801433		3569.77	0.00927917		4099.77	0.05074574
390	-0.0021212		919.99	0.00464527		1449.99	0.03714887		1979.98	0.02935612		2509.98	0.00807223		3039.97	0.01808804		3569.97	0.00941655		4099.97	0.0511291
390.2	-0.00237839		920.19	0.0047229		1450.19	0.037216		1980.18	0.02968291		2510.18	0.00816334		3040.17	0.01830276		3570.17	0.0094267		4100.17	0.0504041
390.4	-0.0018596		920.39	0.00538459		1450.39	0.03701818		1980.38	0.02955169		2510.38	0.00784596		3040.37	0.01786051		3570.37	0.00977479		4100.37	0.05001184
390.6	-0.0016407		920.59	0.00563684		1450.59	0.03646254		1980.58	0.02965127		2510.58	0.00685178		3040.57	0.01837259		3570.57	0.01006462		4100.57	0.05037274
390.8	-0.00147316		920.79	0.00569478		1450.79	0.03604401		1980.78	0.03073288		2510.78	0.00686213		3040.77	0.01801724		3570.77	0.00955656		4100.77	0.04978937
391	-0.00107458		920.99	0.00564641		1450.99	0.03651777		1980.98	0.03113188		2510.98	0.00696709		3040.97	0.01894854		3570.97	0.00979625		4100.97	0.05008281
391.2	-0.00008987		921.19	0.00551504		1451.19	0.03609666		1981.18	0.03154273		2511.18	0.00801271		3041.17	0.01935377		3571.17	0.00910691		4101.17	0.05023284
391.4	0.00094508		921.39	0.00541755		1451.39	0.03535422		1981.38	0.03241882		2511.38	0.0078242		3041.37	0.01999968		3571.37	0.00892873		4101.37	0.0507546
391.6	0.00105927		921.59	0.00459349		1451.59	0.03466079		1981.58	0.03174461		2511.58	0.00825891		3041.57	0.01993919		3571.57	0.00839386		4101.57	0.0513397
391.8	0.00078145		921.79	0.00375649		1451.79	0.03393622		1981.78	0.03226011		2511.78	0.00928727		3041.77	0.02044963		3571.77	0.00910554		4101.77	0.05142468
392	0.000685		921.99	0.00357499		1451.99	0.03328729		1981.98	0.03263268		2511.98	0.00929255		3041.97	0.02051381		3571.97	0.00945782		4101.97	0.05237837
392.2	0.00124124		922.19	0.00397521		1452.19	0.03328543		1982.18	0.03384412		2512.18	0.00938838		3042.17	0.02139594		3572.17	0.00933794		4102.17	0.05226792
392.4	0.00015969		922.39	0.00364984		1452.39	0.0336153		1982.38	0.03460287		2512.38	0.01040799		3042.37	0.02156494		3572.37	0.00923965		4102.37	0.05175599
392.6	0.00056265		922.59	0.00416804		1452.59	0.03423863		1982.58	0.0348675		2512.58	0.01123203		3042.57	0.02077066		3572.57	0.00889216		4102.57	0.05183643
392.8	-0.00054208		922.79	0.00443723		1452.79	0.03431467		1982.78	0.03502657		2512.78	0.0108291		3042.77	0.02000033		3572.77	0.00857008		4102.77	0.05244472
393	-0.00070151		922.99	0.00430241		1452.99	0.03430612		1982.98	0.03522757		2512.98	0.01031121		3042.97	0.02047498		3572.97	0.0079693		4102.97	0.05180406
393.2	-0.00122789		923.19	0.00300682		1453.19	0.03428977		1983.18	0.03453213		2513.18	0.01001454		3043.17	0.02030656		3573.17	0.00710722		4103.17	0.05106165
393.4	-0.00099179		923.39	0.00332194		1453.39	0.0340307		1983.38	0.03341786		2513.38	0.00975267		3043.37	0.01988711		3573.37	0.00657583		4103.37	0.05208621
393.6	-0.00171081		923.59	0.00339553		1453.59	0.03356241		1983.58	0.03300804		2513.58	0.00908496		3043.57	0.01990037		3573.57	0.0074996		4103.57	0.05290804
393.8	-0.00232569		923.79	0.00340381		1453.79	0.03334928		1983.78	0.03236821		2513.78	0.00877627		3043.77	0.01857083		3573.77	0.00728698		4103.77	0.05197817
394	-0.00268489		923.99	0.00248353		1453.99	0.03382669		1983.98	0.03074766		2513.98	0.0091924		3043.97	0.01854382		3573.97	0.00726924		4103.97	0.05112042
394.2	-0.00344196		924.19	0.0019479		1454.19	0.03315673		1984.18	0.03086584		2514.18	0.00965383		3044.17	0.01763526		3574.17	0.00802524		4104.17	0.05132849
394.4	-0.00388789		924.39	0.00196489		1454.39	0.03281185		1984.38	0.03055463		2514.38	0.00830535		3044.37	0.01757734		3574.37	0.0088105		4104.37	0.05132271
394.6	-0.00435684		924.59	0.00219687		1454.59	0.03208212		1984.58	0.03008373		2514.58	0.00792703		3044.57	0.0168554		3574.57	0.0091831		4104.57	0.05113546
394.8	-0.00458455		924.79	0.00251733		1454.79	0.03170772		1984.78	0.03043102		2514.78	0.00822843		3044.77	0.01683794		3574.77	0.01022794		4104.77	0.05060656
395	-0.00470279		924.99	0.0021962		1454.99	0.03185412		1984.98	0.03011666		2514.98	0.00813557		3044.97	0.01700646		3574.97	0.0107064		4104.97	0.0518202
395.2	-0.00473347		925.19	0.00301042		1455.19	0.0307222		1985.18	0.0298443		2515.18	0.00750209		3045.17	0.01679203		3575.17	0.00992992		4105.17	0.05209035
395.4	-0.00410379		925.39	0.00385818		1455.39	0.03029879		1985.38	0.02991936		2515.38	0.00733673		3045.37	0.01727266		3575.37	0.01023727		4105.37	0.05180981
395.6	-0.003877		925.59	0.00434765		1455.59	0.02945947		1985.58	0.02931929		2515.58	0.00686727		3045.57	0.01748384		3575.57	0.0097462		4105.57	0.05165032
395.8	-0.00399732		925.79	0.00463911		1455.79	0.02915252		1985.78	0.03035939		2515.78	0.00715976		3045.77	0.01727524		3575.77	0.01032042		4105.77	0.05082247
396	-0.00340754		925.99	0.005574		1455.99	0.03028975		1985.98	0.03106448		2515.98	0.00735082		3045.97	0.01766154		3575.97	0.00979313		4105.97	0.05110175
396.2	-0.00238232		926.19	0.00602454		1456.19	0.03156462		1986.18	0.03120951		2516.18	0.00762492		3046.17	0.01757335		3576.17	0.00902836		4106.17	0.05047608
396.4	-0.00285713		926.39	0.00604252		1456.39	0.0323891		1986.38	0.03191027		2516.38	0.00773132		3046.37	0.01761854		3576.37	0.008536		4106.37	0.05077809
396.6	-0.00146638		926.59	0.00682932		1456.59	0.03320204		1986.58	0.03181398		2516.58	0.00755154		3046.57	0.01777321		3576.57	0.00785272		4106.57	0.05097521
396.8	-0.00197103		926.79	0.00654754		1456.79	0.03340017		1986.78	0.03233432		2516.78	0.00697917		3046.77	0.01803963		3576.77	0.00706486		4106.77	0.05146881
397	-0.00205516		926.99	0.00574937		1456.99	0.03398473		1986.98	0.03304788		2516.98	0.00691751		3046.97	0.01833386		3576.97	0.00698333		4106.97	0.05147669
397.2	-0.00218972		927.19	0.00505036		1457.19	0.03387779		1987.18	0.03308746		2517.18	0.00747927		3047.17	0.01773665		3577.17	0.00664141		4107.17	0.05086302
397.4	-0.00304799		927.39	0.00517566		1457.39	0.03405175		1987.38	0.03370628		2517.38	0.00722538		3047.37	0.01760147		3577.37	0.00624292		4107.37	0.0510894
397.6	-0.00391652		927.59	0.00563533		1457.59	0.03517736		1987.58	0.03419371		2517.58	0.00675786		3047.57	0.01833324		3577.57	0.00528054		4107.57	0.05116956
397.8	-0.00451745		927.79	0.00574943		1457.79	0.03660359		1987.78	0.03352745		2517.78	0.00686516		3047.77	0.01931126		3577.77	0.00489427		4107.77	0.05101694
398	-0.00530039		927.99	0.00516429		1457.99	0.03596862		1987.98	0.03281737		2517.98	0.0074304		3047.97	0.02045026		3577.97	0.0052007		4107.97	0.05160946
398.2	-0.00585511		928.19	0.00480798		1458.19	0.03592756		1988.18	0.0330436		2518.18	0.00801112		3048.17	0.02060559		3578.17	0.00515014		4108.17	0.05204606
398.4	-0.006393		928.39	0.00453651		1458.39	0.03605771		1988.38	0.03311606		2518.38	0.0067723		3048.37	0.0213024		3578.37	0.00630163		4108.37	0.05119323
398.6	-0.007315		928.59	0.00487072		1458.59	0.03578261		1988.58	0.03287273		2518.58	0.00681879		3048.57	0.02132485		3578.57	0.00686188		4108.57	0.05070418
398.8	-0.00752088		928.79	0.00427719		1458.79	0.03590284		1988.78	0.03293723		2518.78	0.00668102		3048.77	0.02136665		3578.77	0.0074555		4108.77	0.05043424
399	-0.00701912		928.99	0.0045653		1458.99	0.03538442		1988.98	0.03198279		2518.98	0.00678595		3048.97	0.02168993		3578.97	0.00684341		4108.97	0.04991918
399.2	-0.00676858		929.19	0.00496553		1459.19	0.03429868		1989.18	0.03108525		2519.18	0.006222		3049.17	0.0213771		3579.17	0.0069079		4109.17	0.04947532
399.4	-0.00628026		929.39	0.0048788		1459.39	0.03390747		1989.38	0.0308657		2519.38	0.00693387		3049.37	0.02159817		3579.37	0.00687051		4109.37	0.04898387
399.6	-0.00548419		929.59	0.00406091		1459.59	0.03269446		1989.58	0.0296309		2519.58	0.00666076		3049.57	0.02163148		3579.57	0.00602694		4109.57	0.04846527
399.8	-0.00491659		929.79	0.00343418		1459.79	0.03280242		1989.78	0.02939423		2519.78	0.00736558		3049.77	0.02102598		3579.77	0.00611809		4109.77	0.04816825
400	-0.00379024		929.99	0.00365598		1459.99	0.03260767		1989.98	0.02940144		2519.98	0.00752669		3049.97	0.02064089		3579.97	0.00602878		4109.97	0.04826504
400.2	-0.00292426		930.19	0.00395859		1460.19	0.03149371		1990.18	0.02889494		2520.18	0.00822508		3050.17	0.01926224		3580.17	0.00559039		4110.17	0.04819268
400.4	-0.00218671		930.39	0.00378385		1460.39	0.03099297		1990.38	0.02908291		2520.38	0.00826798		3050.37	0.01889068		3580.37	0.00553663		4110.37	0.04774362
400.6	-0.00112975		930.59	0.00397065		1460.59	0.03071584		1990.58	0.028769		2520.58	0.0082683		3050.57	0.01757836		3580.57	0.00517584		4110.57	0.04772235
400.8	-0.00121322		930.79	0.00401682		1460.79	0.02981841		1990.78	0.02960338		2520.78	0.00888031		3050.77	0.01631296		3580.77	0.00537719		4110.77	0.04828631
401	-0.00147887		930.99	0.00369078		1460.99	0.02996556		1990.98	0.03043434		2520.98	0.00897057		3050.97	0.01604604		3580.97	0.00624692		4110.97	0.04831042
401.2	-0.00211045		931.19	0.00395445		1461.19	0.02986741		1991.18	0.03065684		2521.18	0.0091278		3051.17	0.01605694		3581.17	0.00659343		4111.17	0.04794146
401.4	-0.00223369		931.39	0.00407808		1461.39	0.0304725		1991.38	0.03106501		2521.38	0.00961588		3051.37	0.01665452		3581.37	0.00584163		4111.37	0.04882206
401.6	-0.00240089		931.59	0.00425839		1461.59	0.03111906		1991.58	0.03114902		2521.58	0.0100998		3051.57	0.01756677		3581.57	0.0064332		4111.57	0.05013494
401.8	-0.00230047		931.79	0.00359881		1461.79	0.03087819		1991.78	0.03192264		2521.78	0.00988377		3051.77	0.01784744		3581.77	0.00680813		4111.77	0.05096261
402	-0.00282651		931.99	0.00293356		1461.99	0.02955222		1991.98	0.03219535		2521.98	0.01043241		3051.97	0.01749867		3581.97	0.00679663		4111.97	0.0518671
402.2	-0.00360902		932.19	0.00212218		1462.19	0.03003327		1992.18	0.032676		2522.18	0.01001715		3052.17	0.01747033		3582.17	0.00644117		4112.17	0.05194081
402.4	-0.00410013		932.39	0.00173165		1462.39	0.02976784		1992.38	0.0331207		2522.38	0.00882351		3052.37	0.01670763		3582.37	0.00725032		4112.37	0.05250602
402.6	-0.00491396		932.59	0.00180229		1462.59	0.03035086		1992.58	0.03357059		2522.58	0.0075624		3052.57	0.01668223		3582.57	0.00727755		4112.57	0.05283299
402.8	-0.00445392		932.79	0.00106436		1462.79	0.03115899		1992.78	0.03339016		2522.78	0.00709561		3052.77	0.01682508		3582.77	0.00777583		4112.77	0.05262944
403	-0.00450669		932.99	-0.00003796		1462.99	0.03235672		1992.98	0.03289825		2522.98	0.00686026		3052.97	0.01718954		3582.97	0.0076242		4112.97	0.05275208
403.2	-0.00420236		933.19	-0.00051903		1463.19	0.03232483		1993.18	0.03265019		2523.18	0.00599909		3053.17	0.01652176		3583.17	0.00734821		4113.17	0.05381748
403.4	-0.00378254		933.39	-0.00070034		1463.39	0.03350336		1993.38	0.0328061		2523.38	0.0063793		3053.37	0.01681407		3583.37	0.00641378		4113.37	0.05400509
403.6	-0.0031485		933.59	-0.00163344		1463.59	0.03261924		1993.58	0.03199379		2523.58	0.00682127		3053.57	0.01683883		3583.57	0.00476658		4113.57	0.05367644
403.8	-0.00308427		933.79	-0.00145714		1463.79	0.03263189		1993.78	0.03244022		2523.78	0.0072904		3053.77	0.0166384		3583.77	0.0044574		4113.77	0.05361087
404	-0.00331031		933.99	0.00024834		1463.99	0.03243077		1993.98	0.03202563		2523.98	0.00734383		3053.97	0.01622817		3583.97	0.00381102		4113.97	0.0528281
404.2	-0.00322464		934.19	0.00114763		1464.19	0.03180573		1994.18	0.03063778		2524.18	0.0078383		3054.17	0.01625275		3584.17	0.00282683		4114.17	0.05163148
404.4	-0.00283265		934.39	0.00145551		1464.39	0.03162321		1994.38	0.03053293		2524.38	0.00739592		3054.37	0.01568518		3584.37	0.00233874		4114.37	0.05080936
404.6	-0.00239772		934.59	0.00268771		1464.59	0.03164032		1994.58	0.03081983		2524.58	0.00757148		3054.57	0.01518904		3584.57	0.00234445		4114.57	0.05111442
404.8	-0.00296649		934.79	0.00364706		1464.79	0.03151923		1994.78	0.03156539		2524.78	0.00753176		3054.77	0.01577258		3584.77	0.00248115		4114.77	0.05133872
405	-0.0034916		934.99	0.00383627		1464.99	0.03237019		1994.98	0.0318454		2524.98	0.00692857		3054.97	0.01642941		3584.97	0.003341		4114.97	0.0509891
405.2	-0.00323289		935.19	0.00330817		1465.19	0.03176426		1995.18	0.03191921		2525.18	0.00685451		3055.17	0.01693931		3585.17	0.00384643		4115.17	0.05043532
405.4	-0.00287853		935.39	0.00359313		1465.39	0.03153774		1995.38	0.03123065		2525.38	0.00746206		3055.37	0.01779268		3585.37	0.00397949		4115.37	0.05021144
405.6	-0.00326318		935.59	0.00398409		1465.59	0.03040705		1995.58	0.0319925		2525.58	0.00699983		3055.57	0.01759709		3585.57	0.00478592		4115.57	0.05036212
405.8	-0.0040496		935.79	0.00454183		1465.79	0.02962064		1995.78	0.03152488		2525.78	0.00716744		3055.77	0.01835491		3585.77	0.00477098		4115.77	0.05103437
406	-0.00533883		935.99	0.00441916		1465.99	0.02829865		1995.98	0.03078901		2525.98	0.00754891		3055.97	0.01874359		3585.97	0.00577058		4115.97	0.0513238
406.2	-0.00608868		936.19	0.00415599		1466.19	0.02812488		1996.18	0.03041653		2526.18	0.00729416		3056.17	0.01866958		3586.17	0.00585023		4116.17	0.05126538
406.4	-0.00658332		936.39	0.00469093		1466.39	0.02805695		1996.38	0.03073307		2526.38	0.00625452		3056.37	0.01867266		3586.37	0.00646263		4116.37	0.05228005
406.6	-0.00702673		936.59	0.00419601		1466.59	0.02920068		1996.58	0.03078681		2526.58	0.00488524		3056.57	0.01919064		3586.57	0.00699369		4116.57	0.05290618
406.8	-0.00672789		936.79	0.00299263		1466.79	0.03002742		1996.78	0.02973302		2526.78	0.00393552		3056.77	0.01876519		3586.77	0.00736059		4116.77	0.05325784
407	-0.00745405		936.99	0.00278581		1466.99	0.03121493		1996.98	0.0298083		2526.98	0.00331182		3056.97	0.01881893		3586.97	0.00733917		4116.97	0.05364988
407.2	-0.00611754		937.19	0.00277683		1467.19	0.03109405		1997.18	0.02984207		2527.18	0.00366443		3057.17	0.01819514		3587.17	0.00781199		4117.17	0.05345457
407.4	-0.00607439		937.39	0.00298807		1467.39	0.03228803		1997.38	0.03032056		2527.38	0.00438762		3057.37	0.01798676		3587.37	0.00761669		4117.37	0.05252207
407.6	-0.00631814		937.59	0.00257258		1467.59	0.03083638		1997.58	0.03094007		2527.58	0.00518285		3057.57	0.01874491		3587.57	0.00701726		4117.57	0.05249911
407.8	-0.00637422		937.79	0.00231579		1467.79	0.03088878		1997.78	0.03190949		2527.78	0.0057121		3057.77	0.01825206		3587.77	0.0075016		4117.77	0.05229329
408	-0.0071619		937.99	0.00303148		1467.99	0.03092366		1997.98	0.03145988		2527.98	0.00576106		3057.97	0.01802258		3587.97	0.00714206		4117.97	0.05148722
408.2	-0.00672959		938.19	0.00197148		1468.19	0.03038001		1998.18	0.0320284		2528.18	0.00672061		3058.17	0.01794225		3588.17	0.0066366		4118.17	0.05129809
408.4	-0.00730423		938.39	0.00175955		1468.39	0.03103682		1998.38	0.03346806		2528.38	0.00710271		3058.37	0.01666903		3588.37	0.00651256		4118.37	0.05151467
408.6	-0.00706626		938.59	0.00149566		1468.59	0.0314608		1998.58	0.03451439		2528.58	0.00703453		3058.57	0.01617685		3588.57	0.00637511		4118.57	0.05190902
408.8	-0.00760389		938.79	0.00089849		1468.79	0.03069226		1998.78	0.03459025		2528.78	0.0067951		3058.77	0.01662233		3588.77	0.00520351		4118.77	0.05210878
409	-0.00689996		938.99	0.00020561		1468.99	0.03053214		1998.98	0.03419195		2528.98	0.00712138		3058.97	0.01666438		3588.97	0.00556516		4118.97	0.05098097
409.2	-0.00580703		939.19	-0.00021438		1469.19	0.03012379		1999.18	0.03312706		2529.18	0.00698446		3059.17	0.01667524		3589.17	0.00481168		4119.17	0.0502645
409.4	-0.00619619		939.39	-0.00037918		1469.39	0.03017285		1999.38	0.0317233		2529.38	0.00763728		3059.37	0.01609695		3589.37	0.00411116		4119.37	0.05008159
409.6	-0.00624319		939.59	-0.00019336		1469.59	0.029326		1999.58	0.03191089		2529.58	0.00737723		3059.57	0.01581753		3589.57	0.00397494		4119.57	0.050388
409.8	-0.00678572		939.79	-0.00002149		1469.79	0.02883193		1999.78	0.03005331		2529.78	0.00817177		3059.77	0.01663244		3589.77	0.0038655		4119.77	0.0504077
410	-0.00664145		939.99	-0.00110648		1469.99	0.02790828		1999.98	0.0298054		2529.98	0.00715877		3059.97	0.01616074		3589.97	0.00366221		4119.97	0.05069226
410.2	-0.00631679		940.19	-0.00088212		1470.19	0.02845065		2000.18	0.02942425		2530.18	0.00683126		3060.17	0.01513419		3590.17	0.0029593		4120.17	0.05069514
410.4	-0.00630157		940.39	-0.00116257		1470.39	0.02952231		2000.38	0.02894871		2530.38	0.00553673		3060.37	0.0156749		3590.37	0.00266764		4120.37	0.05147095
410.6	-0.00618875		940.59	-0.001998		1470.59	0.02952815		2000.58	0.02798657		2530.58	0.00492083		3060.57	0.01558488		3590.57	0.00292175		4120.57	0.05092403
410.8	-0.00535147		940.79	-0.00185356		1470.79	0.0297463		2000.78	0.02702593		2530.78	0.00427605		3060.77	0.01553795		3590.77	0.00356006		4120.77	0.04985411
411	-0.00409014		940.99	-0.00123623		1470.99	0.0304208		2000.98	0.0270765		2530.98	0.0039288		3060.97	0.01680562		3590.97	0.00467526		4120.97	0.04920684
411.2	-0.00311845		941.19	-0.00098898		1471.19	0.03009219		2001.18	0.02680244		2531.18	0.00393753		3061.17	0.01671921		3591.17	0.00530504		4121.17	0.04873165
411.4	-0.00333708		941.39	-0.0004501		1471.39	0.03059448		2001.38	0.02739786		2531.38	0.00432219		3061.37	0.01672485		3591.37	0.0048512		4121.37	0.04842174
411.6	-0.00402395		941.59	-0.00031902		1471.59	0.03046834		2001.58	0.02772627		2531.58	0.00392668		3061.57	0.01741272		3591.57	0.00566086		4121.57	0.04901262
411.8	-0.00427724		941.79	-0.00041279		1471.79	0.03135641		2001.78	0.02792585		2531.78	0.00393213		3061.77	0.0164083		3591.77	0.00676905		4121.77	0.04953794
412	-0.00509601		941.99	0.00020013		1471.99	0.03233854		2001.98	0.02824021		2531.98	0.00460309		3061.97	0.01645104		3591.97	0.00755955		4121.97	0.04943911
412.2	-0.00590965		942.19	0.0000004		1472.19	0.03161614		2002.18	0.02875857		2532.18	0.00473919		3062.17	0.01542248		3592.17	0.00817493		4122.17	0.04950177
412.4	-0.00625226		942.39	0.00083725		1472.39	0.03200561		2002.38	0.02959221		2532.38	0.00481377		3062.37	0.014093		3592.37	0.00733961		4122.37	0.04936689
412.6	-0.00600962		942.59	0.00081638		1472.59	0.03162253		2002.58	0.02976708		2532.58	0.00468921		3062.57	0.01341531		3592.57	0.00755122		4122.57	0.05020477
412.8	-0.00634363		942.79	0.00108407		1472.79	0.03050782		2002.78	0.02959987		2532.78	0.00492304		3062.77	0.01310593		3592.77	0.00647407		4122.77	0.05022819
413	-0.00631571		942.99	0.00128778		1472.99	0.03023698		2002.98	0.03026867		2532.98	0.0042281		3062.97	0.01242166		3592.97	0.00681704		4122.97	0.04949957
413.2	-0.00693963		943.19	0.00144595		1473.19	0.02963009		2003.18	0.02994114		2533.18	0.00423383		3063.17	0.01147831		3593.17	0.00597262		4123.17	0.04975476
413.4	-0.00753256		943.39	0.00160949		1473.39	0.02829111		2003.38	0.03007242		2533.38	0.00574118		3063.37	0.01065925		3593.37	0.00505701		4123.37	0.050254
413.6	-0.00721501		943.59	0.00291198		1473.59	0.02744784		2003.58	0.03119643		2533.58	0.00585459		3063.57	0.01128467		3593.57	0.00524282		4123.57	0.04944395
413.8	-0.00843514		943.79	0.00277672		1473.79	0.02638804		2003.78	0.03064419		2533.78	0.00652075		3063.77	0.01169625		3593.77	0.00482241		4123.77	0.04860909
414	-0.00852812		943.99	0.00281931		1473.99	0.02686218		2003.98	0.03117692		2533.98	0.00672651		3063.97	0.01193781		3593.97	0.00475568		4123.97	0.04870353
414.2	-0.0084029		944.19	0.00278779		1474.19	0.02706389		2004.18	0.03125545		2534.18	0.00689529		3064.17	0.01262649		3594.17	0.00430463		4124.17	0.04817854
414.4	-0.008388		944.39	0.00161336		1474.39	0.02730488		2004.38	0.03015664		2534.38	0.00682246		3064.37	0.01442131		3594.37	0.00466845		4124.37	0.04772181
414.6	-0.00797445		944.59	0.00159112		1474.59	0.02669146		2004.58	0.03025977		2534.58	0.00667647		3064.57	0.01485966		3594.57	0.00414785		4124.57	0.04725804
414.8	-0.00745829		944.79	0.00170807		1474.79	0.02746137		2004.78	0.03050958		2534.78	0.00600914		3064.77	0.01643483		3594.77	0.0038036		4124.77	0.04616263
415	-0.00694924		944.99	0.00160033		1474.99	0.02786199		2004.98	0.03055016		2534.98	0.00524814		3064.97	0.01804477		3594.97	0.00390707		4124.97	0.04572983
415.2	-0.0074889		945.19	0.0009129		1475.19	0.02797457		2005.18	0.03022058		2535.18	0.00536512		3065.17	0.01811953		3595.17	0.0033667		4125.17	0.04557559
415.4	-0.00784646		945.39	0.00064719		1475.39	0.02859667		2005.38	0.02984024		2535.38	0.00558689		3065.37	0.01894813		3595.37	0.00345631		4125.37	0.04570483
415.6	-0.00861439		945.59	0.00031488		1475.59	0.0287064		2005.58	0.02887201		2535.58	0.00489498		3065.57	0.01990131		3595.57	0.00400009		4125.57	0.04574146
415.8	-0.0080806		945.79	0.00004173		1475.79	0.02906828		2005.78	0.02852315		2535.78	0.00559007		3065.77	0.01980191		3595.77	0.0044401		4125.77	0.04640773
416	-0.00810222		945.99	0.0000139		1475.99	0.0296021		2005.98	0.0280567		2535.98	0.00583028		3065.97	0.01879105		3595.97	0.00388713		4125.97	0.04659836
416.2	-0.00741904		946.19	-0.00060789		1476.19	0.02933361		2006.18	0.0280098		2536.18	0.00554327		3066.17	0.01795859		3596.17	0.00351048		4126.17	0.0464585
416.4	-0.00666472		946.39	-0.00034678		1476.39	0.03019114		2006.38	0.02832484		2536.38	0.00559145		3066.37	0.01720109		3596.37	0.00269775		4126.37	0.04778233
416.6	-0.00645446		946.59	-0.00057674		1476.59	0.02949175		2006.58	0.0281616		2536.58	0.00457888		3066.57	0.01652306		3596.57	0.00342017		4126.57	0.04855049
416.8	-0.00660186		946.79	-0.00041687		1476.79	0.02838588		2006.78	0.02865796		2536.78	0.00415135		3066.77	0.01599799		3596.77	0.0025146		4126.77	0.04819484
417	-0.00683464		946.99	-0.0002906		1476.99	0.02799277		2006.98	0.02915546		2536.98	0.00386537		3066.97	0.01523868		3596.97	0.00322197		4126.97	0.04943822
417.2	-0.00658619		947.19	0.00009321		1477.19	0.02714582		2007.18	0.02862764		2537.18	0.00481385		3067.17	0.01506857		3597.17	0.00374031		4127.17	0.05007872
417.4	-0.00597749		947.39	0.00156724		1477.39	0.02755983		2007.38	0.0283558		2537.38	0.00546373		3067.37	0.01451512		3597.37	0.00362634		4127.37	0.05054389
417.6	-0.00542063		947.59	0.00183649		1477.59	0.02769236		2007.58	0.02905994		2537.58	0.00508382		3067.57	0.01467122		3597.57	0.00504979		4127.57	0.05000587
417.8	-0.00570702		947.79	0.00214562		1477.79	0.02801573		2007.78	0.0292023		2537.78	0.00492429		3067.77	0.01417081		3597.77	0.0055905		4127.77	0.05050766
418	-0.00557342		947.99	0.00271693		1477.99	0.02857858		2007.98	0.03011582		2537.98	0.00518425		3067.97	0.01394446		3597.97	0.00612197		4127.97	0.05058522
418.2	-0.00606646		948.19	0.00297589		1478.19	0.02896179		2008.18	0.03025421		2538.18	0.00507848		3068.17	0.0136394		3598.17	0.00652996		4128.17	0.0508505
418.4	-0.00606131		948.39	0.00322146		1478.39	0.02978892		2008.38	0.02995557		2538.38	0.00471302		3068.37	0.0134971		3598.37	0.00725939		4128.37	0.04981477
418.6	-0.00663473		948.59	0.00380785		1478.59	0.03010267		2008.58	0.031845		2538.58	0.00378622		3068.57	0.01309663		3598.57	0.0071132		4128.57	0.0497234
418.8	-0.00700929		948.79	0.00313541		1478.79	0.03117458		2008.78	0.03173188		2538.78	0.0035051		3068.77	0.01413316		3598.77	0.00728384		4128.77	0.04917405
419	-0.00702742		948.99	0.00298144		1478.99	0.03149327		2008.98	0.03103656		2538.98	0.0038954		3068.97	0.01403786		3598.97	0.00747635		4128.97	0.04915224
419.2	-0.0074595		949.19	0.00287601		1479.19	0.03083441		2009.18	0.03040833		2539.18	0.00435973		3069.17	0.01446529		3599.17	0.00792248		4129.17	0.04945855
419.4	-0.00900373		949.39	0.0029668		1479.39	0.03029429		2009.38	0.02992029		2539.38	0.00524666		3069.37	0.01455112		3599.37	0.00799254		4129.37	0.04944424
419.6	-0.00929428		949.59	0.00278752		1479.59	0.02979507		2009.58	0.03002049		2539.58	0.00605493		3069.57	0.01426105		3599.57	0.00697971		4129.57	0.04916619
419.8	-0.00847566		949.79	0.00285553		1479.79	0.02974688		2009.78	0.02991004		2539.78	0.00639506		3069.77	0.01438823		3599.77	0.0074328		4129.77	0.0497559
420	-0.0083999		949.99	0.00219636		1479.99	0.02991903		2009.98	0.02942864		2539.98	0.00689844		3069.97	0.01398708		3599.97	0.00680524		4129.97	0.04904748
420.2	-0.00807194		950.19	0.00142535		1480.19	0.02991905		2010.18	0.03014397		2540.18	0.00640198		3070.17	0.01390361		3600.17	0.00737237		4130.17	0.0489364
420.4	-0.00826177		950.39	0.00113295		1480.39	0.02995617		2010.38	0.03007037		2540.38	0.00560988		3070.37	0.01400995		3600.37	0.00690337		4130.37	0.04920991
420.6	-0.00782492		950.59	0.0015057		1480.59	0.02908687		2010.58	0.0298324		2540.58	0.00475763		3070.57	0.01442292		3600.57	0.00672209		4130.57	0.04861487
420.8	-0.0080025		950.79	0.00178043		1480.79	0.02856131		2010.78	0.02925828		2540.78	0.0050342		3070.77	0.01401614		3600.77	0.00613091		4130.77	0.04909839
421	-0.00808653		950.99	0.00145052		1480.99	0.02818217		2010.98	0.02878827		2540.98	0.00490008		3070.97	0.01366292		3600.97	0.00587333		4130.97	0.04980692
421.2	-0.00743732		951.19	0.0015448		1481.19	0.02790519		2011.18	0.02801106		2541.18	0.00443978		3071.17	0.01384149		3601.17	0.005036		4131.17	0.04993947
421.4	-0.00793972		951.39	0.00166617		1481.39	0.02839602		2011.38	0.02808088		2541.38	0.00379014		3071.37	0.01368905		3601.37	0.00411636		4131.37	0.0495344
421.6	-0.00811946		951.59	0.00106302		1481.59	0.02809641		2011.58	0.02882341		2541.58	0.0031794		3071.57	0.01327166		3601.57	0.00383731		4131.57	0.04890087
421.8	-0.00816045		951.79	0.00134347		1481.79	0.02772867		2011.78	0.029048		2541.78	0.00361177		3071.77	0.01319579		3601.77	0.00325283		4131.77	0.04913549
422	-0.00901181		951.99	0.00103094		1481.99	0.02668474		2011.98	0.0284489		2541.98	0.00366904		3071.97	0.01326676		3601.97	0.00296339		4131.97	0.04870705
422.2	-0.00905537		952.19	0.00098628		1482.19	0.02741931		2012.18	0.02830654		2542.18	0.00347192		3072.17	0.01338611		3602.17	0.00234658		4132.17	0.04906014
422.4	-0.00867222		952.39	0.00064952		1482.39	0.02750866		2012.38	0.02792332		2542.38	0.00304659		3072.37	0.01368532		3602.37	0.00214447		4132.37	0.04846265
422.6	-0.00928503		952.59	0.00043779		1482.59	0.02896204		2012.58	0.02881786		2542.58	0.00332468		3072.57	0.01432266		3602.57	0.00258445		4132.57	0.04910007
422.8	-0.00927902		952.79	0.00002986		1482.79	0.02973336		2012.78	0.02787495		2542.78	0.00408161		3072.77	0.01472912		3602.77	0.0022974		4132.77	0.04935568
423	-0.00949645		952.99	0.00036768		1482.99	0.03007899		2012.98	0.02798367		2542.98	0.00442345		3072.97	0.01508806		3602.97	0.00217204		4132.97	0.04816073
423.2	-0.00978312		953.19	0.00088694		1483.19	0.02998238		2013.18	0.02817849		2543.18	0.00510377		3073.17	0.01611219		3603.17	0.00306208		4133.17	0.04715347
423.4	-0.01007647		953.39	0.00125022		1483.39	0.03008578		2013.38	0.02869126		2543.38	0.0053591		3073.37	0.01616435		3603.37	0.0028486		4133.37	0.04646487
423.6	-0.00947778		953.59	0.00172576		1483.59	0.03028577		2013.58	0.02944729		2543.58	0.00515887		3073.57	0.01739117		3603.57	0.00233876		4133.57	0.04592855
423.8	-0.00932635		953.79	0.00159753		1483.79	0.03039691		2013.78	0.02985728		2543.78	0.00455768		3073.77	0.01806241		3603.77	0.00363848		4133.77	0.04598231
424	-0.00981994		953.99	0.00153583		1483.99	0.03098692		2013.98	0.0302936		2543.98	0.00443772		3073.97	0.01780517		3603.97	0.00328858		4133.97	0.0452186
424.2	-0.00952241		954.19	0.00178457		1484.19	0.03161273		2014.18	0.03117923		2544.18	0.00377432		3074.17	0.01825638		3604.17	0.00378829		4134.17	0.04535111
424.4	-0.00932688		954.39	0.00172933		1484.39	0.03118007		2014.38	0.03078192		2544.38	0.00373779		3074.37	0.01778558		3604.37	0.00425038		4134.37	0.04510672
424.6	-0.00936948		954.59	0.00193436		1484.59	0.03017284		2014.58	0.03044202		2544.58	0.00327207		3074.57	0.01766515		3604.57	0.0044319		4134.57	0.04610592
424.8	-0.00974936		954.79	0.00164341		1484.79	0.03002739		2014.78	0.02961199		2544.78	0.00426678		3074.77	0.01638331		3604.77	0.00459038		4134.77	0.04641302
425	-0.0102022		954.99	0.00145418		1484.99	0.02999214		2014.98	0.02884714		2544.98	0.00406603		3074.97	0.01599376		3604.97	0.00475658		4134.97	0.04677367
425.2	-0.01003608		955.19	0.00171256		1485.19	0.02977253		2015.18	0.02873708		2545.18	0.00273826		3075.17	0.01597861		3605.17	0.00478594		4135.17	0.04826776
425.4	-0.01028018		955.39	0.00202423		1485.39	0.02922495		2015.38	0.02945136		2545.38	0.00289395		3075.37	0.01589535		3605.37	0.00537019		4135.37	0.04881916
425.6	-0.00975622		955.59	0.00237673		1485.59	0.02873003		2015.58	0.02984575		2545.58	0.00239532		3075.57	0.01509393		3605.57	0.00527689		4135.57	0.04950014
425.8	-0.00951585		955.79	0.00170602		1485.79	0.02762253		2015.78	0.02965297		2545.78	0.00357505		3075.77	0.01528861		3605.77	0.00593312		4135.77	0.05027903
426	-0.0097481		955.99	0.00132621		1485.99	0.02718171		2015.98	0.02886419		2545.98	0.00359545		3075.97	0.01473427		3605.97	0.0057944		4135.97	0.05100215
426.2	-0.00968478		956.19	0.00156184		1486.19	0.0277373		2016.18	0.02922993		2546.18	0.00446273		3076.17	0.01449794		3606.17	0.00534838		4136.17	0.0519801
426.4	-0.00911318		956.39	0.0020735		1486.39	0.02871295		2016.38	0.02893561		2546.38	0.00435092		3076.37	0.01456677		3606.37	0.00599886		4136.37	0.05153646
426.6	-0.00966773		956.59	0.00273935		1486.59	0.02996232		2016.58	0.02980184		2546.58	0.0050113		3076.57	0.01561709		3606.57	0.00633404		4136.57	0.05150752
426.8	-0.00932598		956.79	0.00271521		1486.79	0.02949713		2016.78	0.03032234		2546.78	0.00554527		3076.77	0.01510776		3606.77	0.0058062		4136.77	0.05011349
427	-0.00846478		956.99	0.00293278		1486.99	0.02982205		2016.98	0.03120674		2546.98	0.00552015		3076.97	0.01567372		3606.97	0.00511267		4136.97	0.04893842
427.2	-0.00777538		957.19	0.00292368		1487.19	0.02966332		2017.18	0.03137526		2547.18	0.00611051		3077.17	0.01625599		3607.17	0.00544389		4137.17	0.04865813
427.4	-0.00736983		957.39	0.00345856		1487.39	0.02910466		2017.38	0.03180338		2547.38	0.00575582		3077.37	0.01572823		3607.37	0.00480532		4137.37	0.04720504
427.6	-0.00728925		957.59	0.00296513		1487.59	0.02865755		2017.58	0.03202301		2547.58	0.00569252		3077.57	0.01623776		3607.57	0.004751		4137.57	0.04656742
427.8	-0.00761884		957.79	0.00307823		1487.79	0.02879876		2017.78	0.03208572		2547.78	0.0056114		3077.77	0.01560048		3607.77	0.00470104		4137.77	0.0463988
428	-0.00805165		957.99	0.00223971		1487.99	0.02880776		2017.98	0.03213904		2547.98	0.00494128		3077.97	0.01542479		3607.97	0.00436717		4137.97	0.04509154
428.2	-0.0077519		958.19	0.00217546		1488.19	0.02868574		2018.18	0.03177344		2548.18	0.00509257		3078.17	0.01504582		3608.17	0.00478516		4138.17	0.04447403
428.4	-0.00794232		958.39	0.00158357		1488.39	0.02761965		2018.38	0.03104615		2548.38	0.00496554		3078.37	0.01399679		3608.37	0.00488073		4138.37	0.04477709
428.6	-0.00860444		958.59	0.00154173		1488.59	0.02724088		2018.58	0.02999061		2548.58	0.00504385		3078.57	0.01401701		3608.57	0.00377562		4138.57	0.04521928
428.8	-0.00833995		958.79	0.00153491		1488.79	0.02763063		2018.78	0.02865766		2548.78	0.00540537		3078.77	0.01366449		3608.77	0.00397675		4138.77	0.04473248
429	-0.0083551		958.99	0.00150528		1488.99	0.02737874		2018.98	0.0281575		2548.98	0.00497695		3078.97	0.01345511		3608.97	0.00423257		4138.97	0.0457016
429.2	-0.00885366		959.19	0.00107084		1489.19	0.02713549		2019.18	0.02857374		2549.18	0.00424633		3079.17	0.01361875		3609.17	0.00460871		4139.17	0.04676452
429.4	-0.00989913		959.39	0.00129704		1489.39	0.026958		2019.38	0.02894026		2549.38	0.00458253		3079.37	0.01319971		3609.37	0.00485546		4139.37	0.04648735
429.6	-0.0109899		959.59	0.00018259		1489.59	0.02705746		2019.58	0.02766507		2549.58	0.00413961		3079.57	0.01310463		3609.57	0.00474898		4139.57	0.04663005
429.8	-0.01203858		959.79	-0.00070482		1489.79	0.0273467		2019.78	0.02735468		2549.78	0.00516465		3079.77	0.01338424		3609.77	0.00484201		4139.77	0.04696407
430	-0.01190109		959.99	-0.00119986		1489.99	0.02686472		2019.98	0.02682282		2549.98	0.00449667		3079.97	0.01280857		3609.97	0.00367935		4139.97	0.04680483
430.2	-0.01203068		960.19	-0.00118944		1490.19	0.02662936		2020.18	0.02608411		2550.18	0.00369733		3080.17	0.0128255		3610.17	0.00377973		4140.17	0.04702983
430.4	-0.01121928		960.39	-0.00120129		1490.39	0.02680266		2020.38	0.02570719		2550.38	0.00289725		3080.37	0.01313543		3610.37	0.00463871		4140.37	0.04702775
430.6	-0.01180956		960.59	-0.0019621		1490.59	0.02697945		2020.58	0.02674407		2550.58	0.00326075		3080.57	0.01328078		3610.57	0.00484936		4140.57	0.0474826
430.8	-0.01159112		960.79	-0.002662		1490.79	0.02605757		2020.78	0.02725217		2550.78	0.00332359		3080.77	0.01212509		3610.77	0.0044708		4140.77	0.04728409
431	-0.01185194		960.99	-0.00267319		1490.99	0.0258717		2020.98	0.02712733		2550.98	0.00249586		3080.97	0.0129309		3610.97	0.00447536		4140.97	0.04787931
431.2	-0.01169862		961.19	-0.00325469		1491.19	0.0252052		2021.18	0.02746796		2551.18	0.00232814		3081.17	0.01265605		3611.17	0.00550409		4141.17	0.04831791
431.4	-0.01161967		961.39	-0.00300459		1491.39	0.02569241		2021.38	0.02789865		2551.38	0.00248435		3081.37	0.01210556		3611.37	0.00506368		4141.37	0.04739245
431.6	-0.01109219		961.59	-0.00322594		1491.59	0.02561386		2021.58	0.02805297		2551.58	0.00180792		3081.57	0.01217354		3611.57	0.00464046		4141.57	0.04826514
431.8	-0.01118322		961.79	-0.0028701		1491.79	0.0265248		2021.78	0.02836198		2551.78	0.00135149		3081.77	0.01058334		3611.77	0.00387483		4141.77	0.04814757
432	-0.01144432		961.99	-0.00314218		1491.99	0.02697863		2021.98	0.0286269		2551.98	0.00085009		3081.97	0.01037966		3611.97	0.00434296		4141.97	0.04840507
432.2	-0.01093078		962.19	-0.00191004		1492.19	0.02738248		2022.18	0.02833607		2552.18	0.00145102		3082.17	0.0105828		3612.17	0.00422291		4142.17	0.04899837
432.4	-0.01082461		962.39	-0.00148989		1492.39	0.02764883		2022.38	0.02783583		2552.38	0.00128351		3082.37	0.01133234		3612.37	0.00386751		4142.37	0.05027885
432.6	-0.01139976		962.59	-0.00121642		1492.59	0.02875344		2022.58	0.02731904		2552.58	0.00177165		3082.57	0.01133909		3612.57	0.00381983		4142.57	0.05018849
432.8	-0.010709		962.79	-0.00160295		1492.79	0.02999955		2022.78	0.02715548		2552.78	0.00255363		3082.77	0.01186457		3612.77	0.0033894		4142.77	0.04959503
433	-0.0115298		962.99	-0.00189511		1492.99	0.02993972		2022.98	0.02760684		2552.98	0.00346753		3082.97	0.012288		3612.97	0.00357871		4142.97	0.04978382
433.2	-0.01144836		963.19	-0.00245357		1493.19	0.03070448		2023.18	0.02863095		2553.18	0.00403387		3083.17	0.01188211		3613.17	0.00376379		4143.17	0.04977255
433.4	-0.01225812		963.39	-0.00169352		1493.39	0.03118958		2023.38	0.02890466		2553.38	0.00457372		3083.37	0.01160735		3613.37	0.00335142		4143.37	0.04926769
433.6	-0.01208402		963.59	-0.00231623		1493.59	0.03124838		2023.58	0.02820192		2553.58	0.00469819		3083.57	0.01207618		3613.57	0.00277019		4143.57	0.04960548
433.8	-0.01172101		963.79	-0.00210289		1493.79	0.0311132		2023.78	0.02862802		2553.78	0.00429291		3083.77	0.01168786		3613.77	0.00238814		4143.77	0.04917837
434	-0.01116022		963.99	-0.00231059		1493.99	0.03099086		2023.98	0.02778881		2553.98	0.0033622		3083.97	0.01152569		3613.97	0.00305772		4143.97	0.04823507
434.2	-0.01064206		964.19	-0.00183471		1494.19	0.03086095		2024.18	0.02669327		2554.18	0.00345213		3084.17	0.01210509		3614.17	0.00437516		4144.17	0.04822546
434.4	-0.01006787		964.39	-0.00248301		1494.39	0.03108652		2024.38	0.02657574		2554.38	0.00318001		3084.37	0.01252653		3614.37	0.00459392		4144.37	0.04819034
434.6	-0.01054426		964.59	-0.00258865		1494.59	0.03004897		2024.58	0.02642868		2554.58	0.00348151		3084.57	0.01295724		3614.57	0.00418717		4144.57	0.0479433
434.8	-0.01124182		964.79	-0.00171572		1494.79	0.02887779		2024.78	0.02549121		2554.78	0.0031746		3084.77	0.01304606		3614.77	0.00392752		4144.77	0.0474551
435	-0.01123079		964.99	-0.00140927		1494.99	0.02845336		2024.98	0.0256952		2554.98	0.0026961		3084.97	0.01356567		3614.97	0.00379744		4144.97	0.04730887
435.2	-0.01107455		965.19	-0.00129518		1495.19	0.02758651		2025.18	0.02481765		2555.18	0.00279708		3085.17	0.01261846		3615.17	0.00353478		4145.17	0.04756049
435.4	-0.01045737		965.39	-0.00116801		1495.39	0.02742118		2025.38	0.02512247		2555.38	0.00288631		3085.37	0.01261298		3615.37	0.00249815		4145.37	0.04743759
435.6	-0.00988137		965.59	-0.0007052		1495.59	0.02684561		2025.58	0.02536681		2555.58	0.00219594		3085.57	0.01287097		3615.57	0.00208083		4145.57	0.04804558
435.8	-0.00957537		965.79	-0.00075935		1495.79	0.02685056		2025.78	0.02502485		2555.78	0.0029336		3085.77	0.01280864		3615.77	0.00241416		4145.77	0.04744035
436	-0.00921293		965.99	-0.00115493		1495.99	0.02688151		2025.98	0.02509018		2555.98	0.00306999		3085.97	0.0137334		3615.97	0.00292203		4145.97	0.04754932
436.2	-0.00889568		966.19	-0.00042523		1496.19	0.02661485		2026.18	0.02491085		2556.18	0.00243778		3086.17	0.01482235		3616.17	0.00246504		4146.17	0.04719962
436.4	-0.00962526		966.39	0.00015834		1496.39	0.02649074		2026.38	0.02580751		2556.38	0.00186952		3086.37	0.01487406		3616.37	0.00224038		4146.37	0.04763303
436.6	-0.00985077		966.59	-0.00050016		1496.59	0.0263236		2026.58	0.02613162		2556.58	0.00220742		3086.57	0.0154743		3616.57	0.00144126		4146.57	0.04743494
436.8	-0.00986646		966.79	-0.00121754		1496.79	0.0262376		2026.78	0.02728355		2556.78	0.00259807		3086.77	0.01538131		3616.77	0.00079238		4146.77	0.04693175
437	-0.0106878		966.99	-0.0016984		1496.99	0.02563528		2026.98	0.02922951		2556.98	0.00199049		3086.97	0.01508433		3616.97	0.00110241		4146.97	0.04709636
437.2	-0.01022653		967.19	-0.00236079		1497.19	0.02615827		2027.18	0.0298357		2557.18	0.0019804		3087.17	0.01349622		3617.17	0.00139994		4147.17	0.04757536
437.4	-0.01124115		967.39	-0.00173309		1497.39	0.02656521		2027.38	0.03043927		2557.38	0.00107158		3087.37	0.01364418		3617.37	0.00174634		4147.37	0.04733061
437.6	-0.01092406		967.59	-0.00139214		1497.59	0.02640186		2027.58	0.03053649		2557.58	0.00061845		3087.57	0.01427557		3617.57	0.00141127		4147.57	0.04635119
437.8	-0.01052044		967.79	-0.00167128		1497.79	0.02685606		2027.78	0.03056687		2557.78	0.00029533		3087.77	0.0139019		3617.77	0.00245215		4147.77	0.04611262
438	-0.00997054		967.99	-0.00205426		1497.99	0.02720191		2027.98	0.03018194		2557.98	0.00071341		3087.97	0.01348937		3617.97	0.00315221		4147.97	0.04541248
438.2	-0.00950795		968.19	-0.00255581		1498.19	0.02657553		2028.18	0.02997853		2558.18	0.00088395		3088.17	0.01408133		3618.17	0.00287417		4148.17	0.0451897
438.4	-0.00960577		968.39	-0.00233692		1498.39	0.02719414		2028.38	0.0305186		2558.38	0.00062483		3088.37	0.01450126		3618.37	0.00273277		4148.37	0.04481068
438.6	-0.01063702		968.59	-0.00128145		1498.59	0.02639225		2028.58	0.03022455		2558.58	0.00091686		3088.57	0.01397004		3618.57	0.00202539		4148.57	0.04511524
438.8	-0.01163414		968.79	-0.00127703		1498.79	0.02699286		2028.78	0.02985005		2558.78	0.00057559		3088.77	0.01359505		3618.77	0.00180547		4148.77	0.04531537
439	-0.01105058		968.99	-0.0015246		1498.99	0.02730934		2028.98	0.03026283		2558.98	0.00071992		3088.97	0.01297076		3618.97	0.00112671		4148.97	0.0458222
439.2	-0.01169921		969.19	-0.00100708		1499.19	0.02718034		2029.18	0.02915865		2559.18	0.00087699		3089.17	0.01265216		3619.17	0.00043582		4149.17	0.04560588
439.4	-0.01082555		969.39	-0.00092452		1499.39	0.02740838		2029.38	0.02989163		2559.38	0.00143759		3089.37	0.0128514		3619.37	-0.00000978		4149.37	0.04635356
439.6	-0.01104908		969.59	-0.00112899		1499.59	0.02750257		2029.58	0.02983198		2559.58	0.00139929		3089.57	0.01289576		3619.57	0.00041306		4149.57	0.04660016
439.8	-0.01013869		969.79	-0.00133464		1499.79	0.02723253		2029.78	0.02904875		2559.78	0.0022983		3089.77	0.0124064		3619.77	0.00045238		4149.77	0.04649248
440	-0.01057176		969.99	-0.00114751		1499.99	0.027655		2029.98	0.02885052		2559.98	0.00145388		3089.97	0.01236961		3619.97	-0.00029544		4149.97	0.04714041
440.2	-0.01133318		970.19	-0.00051469		1500.19	0.02699397		2030.18	0.02886621		2560.18	0.00100199		3090.17	0.01267141		3620.17	-0.00005867		4150.17	0.04794688
440.4	-0.01222096		970.39	-0.00057991		1500.39	0.0265739		2030.38	0.02897025		2560.38	0.00093083		3090.37	0.01306547		3620.37	-0.00008993		4150.37	0.04824782
440.6	-0.01201356		970.59	-0.0016844		1500.59	0.02636074		2030.58	0.02824274		2560.58	0.00137687		3090.57	0.01333942		3620.57	-0.00010235		4150.57	0.04840418
440.8	-0.01313619		970.79	-0.00187471		1500.79	0.02632153		2030.78	0.0282979		2560.78	0.00119527		3090.77	0.01245132		3620.77	0.00034711		4150.77	0.04811336
441	-0.0132068		970.99	-0.00165869		1500.99	0.0260202		2030.98	0.02780565		2560.98	0.00145094		3090.97	0.01257625		3620.97	0.00107257		4150.97	0.04833023
441.2	-0.01280784		971.19	-0.0021042		1501.19	0.02607865		2031.18	0.02697755		2561.18	0.00190869		3091.17	0.01241165		3621.17	0.00177021		4151.17	0.0480206
441.4	-0.0130173		971.39	-0.00243844		1501.39	0.02601908		2031.38	0.02717078		2561.38	0.00223164		3091.37	0.01340896		3621.37	0.00231999		4151.37	0.04701695
441.6	-0.01224672		971.59	-0.00227961		1501.59	0.0254797		2031.58	0.02683905		2561.58	0.00294427		3091.57	0.01436781		3621.57	0.00255657		4151.57	0.04676613
441.8	-0.01230378		971.79	-0.00287767		1501.79	0.02553079		2031.78	0.02646727		2561.78	0.00271515		3091.77	0.01403749		3621.77	0.00391302		4151.77	0.04749173
442	-0.01204323		971.99	-0.00360212		1501.99	0.02503715		2031.98	0.02612327		2561.98	0.00256251		3091.97	0.01373878		3621.97	0.00387981		4151.97	0.04610273
442.2	-0.01205688		972.19	-0.00317815		1502.19	0.02518686		2032.18	0.02604805		2562.18	0.00256396		3092.17	0.01440944		3622.17	0.00367537		4152.17	0.04655959
442.4	-0.01267823		972.39	-0.00218859		1502.39	0.02601709		2032.38	0.02605963		2562.38	0.00311567		3092.37	0.01417401		3622.37	0.00416973		4152.37	0.04553836
442.6	-0.01351837		972.59	-0.00212725		1502.59	0.02609377		2032.58	0.02568874		2562.58	0.00297821		3092.57	0.01399812		3622.57	0.00405338		4152.57	0.04630131
442.8	-0.01406515		972.79	-0.00252586		1502.79	0.02659653		2032.78	0.02525211		2562.78	0.00280734		3092.77	0.01460813		3622.77	0.00433807		4152.77	0.04653496
443	-0.01369364		972.99	-0.00198614		1502.99	0.02628289		2032.98	0.02501746		2562.98	0.00285778		3092.97	0.01445382		3622.97	0.00399984		4152.97	0.04616843
443.2	-0.01420035		973.19	-0.00185647		1503.19	0.02607826		2033.18	0.02421231		2563.18	0.00287952		3093.17	0.01419612		3623.17	0.00388894		4153.17	0.04580707
443.4	-0.013378		973.39	-0.00230004		1503.39	0.02657917		2033.38	0.02426786		2563.38	0.00294405		3093.37	0.01418086		3623.37	0.0041877		4153.37	0.04621842
443.6	-0.01362666		973.59	-0.00248715		1503.59	0.02712013		2033.58	0.02470556		2563.58	0.00231346		3093.57	0.01383395		3623.57	0.00450435		4153.57	0.04577806
443.8	-0.01254546		973.79	-0.00231072		1503.79	0.0279775		2033.78	0.02409506		2563.78	0.00217907		3093.77	0.01397943		3623.77	0.00387151		4153.77	0.04637644
444	-0.01287013		973.99	-0.00177408		1503.99	0.02878192		2033.98	0.02401849		2563.98	0.00138847		3093.97	0.01435448		3623.97	0.00376177		4153.97	0.04651119
444.2	-0.01243741		974.19	-0.0019879		1504.19	0.02817087		2034.18	0.02421118		2564.18	0.00142411		3094.17	0.01359994		3624.17	0.00426406		4154.17	0.0462297
444.4	-0.01225497		974.39	-0.0016235		1504.39	0.02824089		2034.38	0.02392231		2564.38	0.00077011		3094.37	0.01372317		3624.37	0.00371198		4154.37	0.0454549
444.6	-0.01245809		974.59	-0.00189905		1504.59	0.02814308		2034.58	0.02431604		2564.58	0.00084024		3094.57	0.01276127		3624.57	0.00443086		4154.57	0.04593057
444.8	-0.01277039		974.79	-0.00159125		1504.79	0.02814298		2034.78	0.0244667		2564.78	0.00049835		3094.77	0.01220135		3624.77	0.00457473		4154.77	0.04610995
445	-0.01189765		974.99	-0.00165106		1504.99	0.02776985		2034.98	0.02495663		2564.98	0.00105089		3094.97	0.01167393		3624.97	0.00390817		4154.97	0.04650888
445.2	-0.01248744		975.19	-0.00179553		1505.19	0.02794075		2035.18	0.02577618		2565.18	0.00039563		3095.17	0.01171703		3625.17	0.00387642		4155.17	0.04585001
445.4	-0.01213816		975.39	-0.0029902		1505.39	0.02735982		2035.38	0.02676924		2565.38	0.00015329		3095.37	0.0115781		3625.37	0.00326839		4155.37	0.04625469
445.6	-0.01132194		975.59	-0.0028489		1505.59	0.02760532		2035.58	0.02747331		2565.58	-0.0000609		3095.57	0.01147247		3625.57	0.00335323		4155.57	0.04706403
445.8	-0.01185244		975.79	-0.00304937		1505.79	0.02736981		2035.78	0.02770469		2565.78	-0.00067526		3095.77	0.01022706		3625.77	0.00291788		4155.77	0.04697974
446	-0.01222098		975.99	-0.00343585		1505.99	0.02723026		2035.98	0.02796286		2565.98	-0.00030155		3095.97	0.0095012		3625.97	0.00183014		4155.97	0.04680155
446.2	-0.01231209		976.19	-0.00300704		1506.19	0.02790515		2036.18	0.02869852		2566.18	0.00089905		3096.17	0.00954637		3626.17	0.00155724		4156.17	0.04836555
446.4	-0.01279479		976.39	-0.00327852		1506.39	0.02893801		2036.38	0.0289625		2566.38	0.00212433		3096.37	0.00952779		3626.37	0.00192241		4156.37	0.04715064
446.6	-0.01276874		976.59	-0.00325385		1506.59	0.02900641		2036.58	0.02955624		2566.58	0.00203284		3096.57	0.01046545		3626.57	0.00142275		4156.57	0.04744957
446.8	-0.01269136		976.79	-0.00341781		1506.79	0.02827947		2036.78	0.02916665		2566.78	0.00211887		3096.77	0.01024344		3626.77	0.00138461		4156.77	0.04738087
447	-0.01210211		976.99	-0.00318679		1506.99	0.02833266		2036.98	0.02868066		2566.98	0.00246996		3096.97	0.0099852		3626.97	0.00119214		4156.97	0.0469337
447.2	-0.01273976		977.19	-0.0036301		1507.19	0.02813741		2037.18	0.02851801		2567.18	0.00233611		3097.17	0.01039443		3627.17	0.00091161		4157.17	0.04641622
447.4	-0.01261761		977.39	-0.00384008		1507.39	0.02905575		2037.38	0.028891		2567.38	0.00286422		3097.37	0.01098881		3627.37	0.00115399		4157.37	0.04551426
447.6	-0.01278097		977.59	-0.0039993		1507.59	0.02871348		2037.58	0.0282795		2567.58	0.00247607		3097.57	0.01146187		3627.57	0.0012182		4157.57	0.0453853
447.8	-0.01229658		977.79	-0.00385004		1507.79	0.02827021		2037.78	0.02743581		2567.78	0.00303684		3097.77	0.01202571		3627.77	0.00165044		4157.77	0.04565587
448	-0.01208757		977.99	-0.00412075		1507.99	0.02788252		2037.98	0.02737394		2567.98	0.00384293		3097.97	0.0123184		3627.97	0.0017669		4157.97	0.04493722
448.2	-0.01218006		978.19	-0.00508741		1508.19	0.0272176		2038.18	0.02681188		2568.18	0.00381894		3098.17	0.01214661		3628.17	0.00205991		4158.17	0.04447167
448.4	-0.01280411		978.39	-0.0044598		1508.39	0.02710797		2038.38	0.0265841		2568.38	0.00315557		3098.37	0.01271122		3628.37	0.0021124		4158.37	0.04403306
448.6	-0.01279698		978.59	-0.00419126		1508.59	0.02712775		2038.58	0.02630119		2568.58	0.0031328		3098.57	0.01294182		3628.57	0.00320136		4158.57	0.04419554
448.8	-0.01263099		978.79	-0.00413617		1508.79	0.02638233		2038.78	0.02604864		2568.78	0.00275409		3098.77	0.01341811		3628.77	0.00257487		4158.77	0.04411751
449	-0.01211327		978.99	-0.00431336		1508.99	0.02549302		2038.98	0.0259998		2568.98	0.00231344		3098.97	0.01341913		3628.97	0.00224494		4158.97	0.04401801
449.2	-0.01234933		979.19	-0.00419415		1509.19	0.02620502		2039.18	0.02573402		2569.18	0.00092652		3099.17	0.01380122		3629.17	0.00264051		4159.17	0.04374276
449.4	-0.01117351		979.39	-0.00459314		1509.39	0.02675285		2039.38	0.02648925		2569.38	0.00045545		3099.37	0.01329666		3629.37	0.00211635		4159.37	0.04509741
449.6	-0.01043345		979.59	-0.00417883		1509.59	0.02706388		2039.58	0.02608247		2569.58	0.00032995		3099.57	0.01364925		3629.57	0.00240483		4159.57	0.04544732
449.8	-0.01096679		979.79	-0.00358382		1509.79	0.02706302		2039.78	0.02691715		2569.78	0.0010228		3099.77	0.01390454		3629.77	0.00192087		4159.77	0.04585006
450	-0.01087418		979.99	-0.00360701		1509.99	0.02768694		2039.98	0.02756735		2569.98	0.00280185		3099.97	0.01427983		3629.97	0.00103416		4159.97	0.04679381
450.2	-0.01032869		980.19	-0.00398871		1510.19	0.0283724		2040.18	0.02819912		2570.18	0.00390666		3100.17	0.01370714		3630.17	0.0015686		4160.17	0.04711418
450.4	-0.01003389		980.39	-0.00386849		1510.39	0.02876601		2040.38	0.0282102		2570.38	0.00406636		3100.37	0.013903		3630.37	0.00095585		4160.37	0.04680533
450.6	-0.01022597		980.59	-0.00340597		1510.59	0.02735583		2040.58	0.02844042		2570.58	0.00319606		3100.57	0.01364393		3630.57	0.00104073		4160.57	0.04706556
450.8	-0.01018347		980.79	-0.00388535		1510.79	0.02802217		2040.78	0.02747505		2570.78	0.00302689		3100.77	0.01306334		3630.77	0.00125622		4160.77	0.04691214
451	-0.01106008		980.99	-0.00404533		1510.99	0.02845944		2040.98	0.0272585		2570.98	0.00298354		3100.97	0.01322526		3630.97	0.00050479		4160.97	0.04721149
451.2	-0.0122404		981.19	-0.00411125		1511.19	0.02839746		2041.18	0.02713814		2571.18	0.00305967		3101.17	0.01342953		3631.17	-0.000813		4161.17	0.04670924
451.4	-0.0126883		981.39	-0.00414166		1511.39	0.02831783		2041.38	0.02742318		2571.38	0.0040438		3101.37	0.01331556		3631.37	-0.00064123		4161.37	0.0466424
451.6	-0.01339615		981.59	-0.00477909		1511.59	0.02727016		2041.58	0.0266294		2571.58	0.00397697		3101.57	0.01393068		3631.57	-0.00044587		4161.57	0.04674764
451.8	-0.01362006		981.79	-0.00505169		1511.79	0.02663702		2041.78	0.02673132		2571.78	0.0046605		3101.77	0.01379655		3631.77	-0.00019881		4161.77	0.04639123
452	-0.01419952		981.99	-0.00587088		1511.99	0.02629205		2041.98	0.02645695		2571.98	0.00460473		3101.97	0.01341854		3631.97	-0.0001067		4161.97	0.04597371
452.2	-0.01430159		982.19	-0.00575941		1512.19	0.02591893		2042.18	0.02563405		2572.18	0.00366065		3102.17	0.01373186		3632.17	0.00021604		4162.17	0.04637224
452.4	-0.01433524		982.39	-0.00563126		1512.39	0.02616552		2042.38	0.02481866		2572.38	0.00337682		3102.37	0.01364712		3632.37	0.0005396		4162.37	0.04591681
452.6	-0.01424643		982.59	-0.00587568		1512.59	0.026227		2042.58	0.02323158		2572.58	0.00259025		3102.57	0.01384268		3632.57	0.00105035		4162.57	0.04574478
452.8	-0.0144045		982.79	-0.00599264		1512.79	0.02520606		2042.78	0.02239648		2572.78	0.00194168		3102.77	0.01322867		3632.77	0.00015621		4162.77	0.04531771
453	-0.01443727		982.99	-0.00500311		1512.99	0.02590427		2042.98	0.02211606		2572.98	0.00078508		3102.97	0.01257735		3632.97	0.00009793		4162.97	0.04573799
453.2	-0.01491139		983.19	-0.00371147		1513.19	0.02665059		2043.18	0.02240401		2573.18	-0.00099762		3103.17	0.01255412		3633.17	-0.00025525		4163.17	0.04636438
453.4	-0.01415633		983.39	-0.00319909		1513.39	0.02636579		2043.38	0.02305247		2573.38	-0.00033303		3103.37	0.01226672		3633.37	0.00006508		4163.37	0.04710954
453.6	-0.01407956		983.59	-0.00317947		1513.59	0.02549487		2043.58	0.02313794		2573.58	-0.00020007		3103.57	0.01217182		3633.57	0.00096414		4163.57	0.04677141
453.8	-0.01434956		983.79	-0.00335276		1513.79	0.02558958		2043.78	0.02375406		2573.78	0.00072582		3103.77	0.01214976		3633.77	0.00073908		4163.77	0.04705589
454	-0.01400188		983.99	-0.00384607		1513.99	0.02473412		2043.98	0.02433101		2573.98	-0.00002099		3103.97	0.01204985		3633.97	0.00093899		4163.97	0.04727133
454.2	-0.01437702		984.19	-0.00367249		1514.19	0.0238932		2044.18	0.02454674		2574.18	-0.00041872		3104.17	0.0116126		3634.17	0.00210777		4164.17	0.04753273
454.4	-0.01386814		984.39	-0.00396429		1514.39	0.02275963		2044.38	0.02495207		2574.38	-0.0011901		3104.37	0.01225051		3634.37	0.0024563		4164.37	0.04804992
454.6	-0.01341095		984.59	-0.00413987		1514.59	0.02182663		2044.58	0.02495559		2574.58	-0.00124682		3104.57	0.01147608		3634.57	0.00329171		4164.57	0.0472421
454.8	-0.01438298		984.79	-0.00523719		1514.79	0.02344365		2044.78	0.02451373		2574.78	-0.00071615		3104.77	0.01163083		3634.77	0.00244759		4164.77	0.04652098
455	-0.01438392		984.99	-0.00459681		1514.99	0.02252275		2044.98	0.02551673		2574.98	0.00021227		3104.97	0.01123348		3634.97	0.00170614		4164.97	0.04690409
455.2	-0.01494705		985.19	-0.00367824		1515.19	0.02218281		2045.18	0.02548471		2575.18	0.00068623		3105.17	0.01096158		3635.17	0.00147248		4165.17	0.04627684
455.4	-0.01533815		985.39	-0.00417075		1515.39	0.02130469		2045.38	0.02608575		2575.38	0.00107479		3105.37	0.01147616		3635.37	0.00299346		4165.37	0.04592365
455.6	-0.01496556		985.59	-0.00428875		1515.59	0.02060263		2045.58	0.02588162		2575.58	0.00135798		3105.57	0.01160321		3635.57	0.00382312		4165.57	0.0456188
455.8	-0.01514035		985.79	-0.00373792		1515.79	0.02008205		2045.78	0.02515943		2575.78	0.00143212		3105.77	0.01105639		3635.77	0.00418805		4165.77	0.04601695
456	-0.01524753		985.99	-0.00367866		1515.99	0.02130385		2045.98	0.02438374		2575.98	0.0016517		3105.97	0.01110276		3635.97	0.00413834		4165.97	0.04590358
456.2	-0.01477278		986.19	-0.00355209		1516.19	0.02158786		2046.18	0.02426295		2576.18	0.00187555		3106.17	0.01232667		3636.17	0.00449614		4166.17	0.04590771
456.4	-0.01489632		986.39	-0.00446178		1516.39	0.02309916		2046.38	0.02344792		2576.38	0.00210742		3106.37	0.01179304		3636.37	0.00407684		4166.37	0.0457093
456.6	-0.01490379		986.59	-0.00409896		1516.59	0.02441089		2046.58	0.02308647		2576.58	0.00169229		3106.57	0.01095342		3636.57	0.0032741		4166.57	0.04563915
456.8	-0.01509549		986.79	-0.00370131		1516.79	0.02467969		2046.78	0.02363625		2576.78	0.00182304		3106.77	0.01024723		3636.77	0.00202818		4166.77	0.04549301
457	-0.01607307		986.99	-0.00311286		1516.99	0.02515124		2046.98	0.02380217		2576.98	0.00124326		3106.97	0.0103262		3636.97	0.001829		4166.97	0.04585457
457.2	-0.01703741		987.19	-0.0027746		1517.19	0.02562629		2047.18	0.02464878		2577.18	0.00064323		3107.17	0.01057079		3637.17	0.00242565		4167.17	0.04590518
457.4	-0.0170109		987.39	-0.00290836		1517.39	0.02611796		2047.38	0.02513824		2577.38	0.00181898		3107.37	0.00985132		3637.37	0.00258167		4167.37	0.04571376
457.6	-0.01716796		987.59	-0.00326929		1517.59	0.02692013		2047.58	0.02594655		2577.58	0.00092062		3107.57	0.0104947		3637.57	0.0023703		4167.57	0.04543743
457.8	-0.01699397		987.79	-0.00419899		1517.79	0.02712605		2047.78	0.02549489		2577.78	0.00047244		3107.77	0.01144147		3637.77	0.00109929		4167.77	0.04567758
458	-0.01722381		987.99	-0.00460335		1517.99	0.02631179		2047.98	0.02573718		2577.98	-0.00019602		3107.97	0.01124997		3637.97	0.00098205		4167.97	0.04534224
458.2	-0.01692121		988.19	-0.0048379		1518.19	0.02611482		2048.18	0.02564773		2578.18	0.00026924		3108.17	0.01105246		3638.17	0.00069232		4168.17	0.04506721
458.4	-0.01683945		988.39	-0.00475103		1518.39	0.02612505		2048.38	0.02524804		2578.38	0.00111333		3108.37	0.01127925		3638.37	0.00032968		4168.37	0.0449491
458.6	-0.01678162		988.59	-0.00433575		1518.59	0.026107		2048.58	0.0245808		2578.58	0.00180035		3108.57	0.01142523		3638.57	0.00020316		4168.57	0.04431942
458.8	-0.01760696		988.79	-0.0044684		1518.79	0.02618709		2048.78	0.02377971		2578.78	0.00235422		3108.77	0.01188258		3638.77	-0.00141422		4168.77	0.04438006
459	-0.01667307		988.99	-0.00368359		1518.99	0.02570006		2048.98	0.02380604		2578.98	0.00228195		3108.97	0.01144791		3638.97	-0.00071191		4168.97	0.04424794
459.2	-0.01701156		989.19	-0.0034034		1519.19	0.02580773		2049.18	0.02306997		2579.18	0.00223935		3109.17	0.01133799		3639.17	-0.00006305		4169.17	0.04379719
459.4	-0.01618843		989.39	-0.00420687		1519.39	0.02536323		2049.38	0.02270952		2579.38	0.00221188		3109.37	0.0117783		3639.37	0.00135475		4169.37	0.04320894
459.6	-0.01626564		989.59	-0.00373974		1519.59	0.0237542		2049.58	0.02257537		2579.58	0.00195783		3109.57	0.0116978		3639.57	0.00150147		4169.57	0.04281617
459.8	-0.01606354		989.79	-0.00309974		1519.79	0.02407944		2049.78	0.02222099		2579.78	0.00118519		3109.77	0.01172608		3639.77	0.00150852		4169.77	0.0432042
460	-0.01578317		989.99	-0.00310542		1519.99	0.02474012		2049.98	0.02251341		2579.98	0.00131511		3109.97	0.01161658		3639.97	0.00151755		4169.97	0.04317645
460.2	-0.01566631		990.19	-0.00308232		1520.19	0.02391124		2050.18	0.02295114		2580.18	0.00073633		3110.17	0.01152529		3640.17	0.00247908		4170.17	0.04384207
460.4	-0.01553335		990.39	-0.00289898		1520.39	0.02455184		2050.38	0.02339005		2580.38	-0.00011034		3110.37	0.01027806		3640.37	0.00207549		4170.37	0.04412133
460.6	-0.01543074		990.59	-0.00267426		1520.59	0.02447637		2050.58	0.02399508		2580.58	-0.00087057		3110.57	0.01033448		3640.57	0.00311135		4170.57	0.04421589
460.8	-0.01584044		990.79	-0.00214784		1520.79	0.02385747		2050.78	0.02406134		2580.78	-0.00115119		3110.77	0.01008187		3640.77	0.00268638		4170.77	0.04432864
461	-0.01636957		990.99	-0.0025209		1520.99	0.02359782		2050.98	0.02456		2580.98	-0.0015807		3110.97	0.01031638		3640.97	0.00353076		4170.97	0.04494694
461.2	-0.01604723		991.19	-0.00270023		1521.19	0.02404513		2051.18	0.02577071		2581.18	-0.00091564		3111.17	0.01076028		3641.17	0.00443078		4171.17	0.04488585
461.4	-0.01562324		991.39	-0.00255002		1521.39	0.02372151		2051.38	0.02603965		2581.38	-0.00048032		3111.37	0.01089765		3641.37	0.00349048		4171.37	0.0451207
461.6	-0.0148174		991.59	-0.00350546		1521.59	0.02343209		2051.58	0.02593763		2581.58	-0.00063313		3111.57	0.01146263		3641.57	0.0025601		4171.57	0.04494187
461.8	-0.01500303		991.79	-0.00478321		1521.79	0.02309225		2051.78	0.02535771		2581.78	-0.00097701		3111.77	0.01196752		3641.77	0.00169904		4171.77	0.04498504
462	-0.0152464		991.99	-0.00544696		1521.99	0.02331688		2051.98	0.02568167		2581.98	-0.00060021		3111.97	0.01145254		3641.97	0.00129783		4171.97	0.04414321
462.2	-0.01523733		992.19	-0.0055925		1522.19	0.02393327		2052.18	0.02623797		2582.18	-0.00055188		3112.17	0.01211526		3642.17	0.00087127		4172.17	0.04421789
462.4	-0.01537893		992.39	-0.00509873		1522.39	0.02436483		2052.38	0.02608815		2582.38	0.00021001		3112.37	0.01282515		3642.37	0.00026094		4172.37	0.04455699
462.6	-0.01477944		992.59	-0.00554578		1522.59	0.02489308		2052.58	0.02630003		2582.58	0.00044426		3112.57	0.01313345		3642.57	0.00009736		4172.57	0.04472114
462.8	-0.01443005		992.79	-0.00533589		1522.79	0.02514298		2052.78	0.026518		2582.78	0.00090255		3112.77	0.01322088		3642.77	-0.0003936		4172.77	0.04445811
463	-0.01396806		992.99	-0.00482511		1522.99	0.02604086		2052.98	0.0270466		2582.98	0.0004247		3112.97	0.01267556		3642.97	-0.00021128		4172.97	0.04361288
463.2	-0.01347468		993.19	-0.00467592		1523.19	0.02573737		2053.18	0.02741385		2583.18	0.0011284		3113.17	0.01277197		3643.17	0.00031403		4173.17	0.04301594
463.4	-0.01289546		993.39	-0.0051523		1523.39	0.02567216		2053.38	0.02810754		2583.38	0.00125388		3113.37	0.01280746		3643.37	0.00036911		4173.37	0.04255572
463.6	-0.01321777		993.59	-0.00444519		1523.59	0.02519251		2053.58	0.02853672		2583.58	0.00027269		3113.57	0.01272362		3643.57	-0.00023689		4173.57	0.04298003
463.8	-0.01265245		993.79	-0.00276484		1523.79	0.02584492		2053.78	0.02821965		2583.78	0.00084893		3113.77	0.01296142		3643.77	-0.00062228		4173.77	0.04385763
464	-0.01305263		993.99	-0.0019774		1523.99	0.02551601		2053.98	0.02874682		2583.98	0.001252		3113.97	0.01265885		3643.97	-0.00123817		4173.97	0.0439318
464.2	-0.01275506		994.19	-0.00103535		1524.19	0.02514181		2054.18	0.02818923		2584.18	0.00114454		3114.17	0.0120224		3644.17	-0.00131579		4174.17	0.04433953
464.4	-0.01305084		994.39	-0.0004855		1524.39	0.02511061		2054.38	0.02819321		2584.38	0.00121734		3114.37	0.01195187		3644.37	-0.00102237		4174.37	0.04454654
464.6	-0.01342855		994.59	-0.00036549		1524.59	0.02469761		2054.58	0.02728226		2584.58	0.00143466		3114.57	0.01217248		3644.57	-0.00011087		4174.57	0.04505142
464.8	-0.01332118		994.79	-0.00089509		1524.79	0.02418079		2054.78	0.02661798		2584.78	0.00179354		3114.77	0.01129304		3644.77	-0.00052738		4174.77	0.04498538
465	-0.01303586		994.99	-0.00142902		1524.99	0.02377808		2054.98	0.02589594		2584.98	0.00254634		3114.97	0.0103824		3644.97	0.0003331		4174.97	0.04483712
465.2	-0.01233343		995.19	-0.00133239		1525.19	0.02281615		2055.18	0.02472181		2585.18	0.00304801		3115.17	0.01104886		3645.17	0.00041391		4175.17	0.04468161
465.4	-0.01225667		995.39	-0.00107865		1525.39	0.02225352		2055.38	0.02421154		2585.38	0.00240591		3115.37	0.00996848		3645.37	0.00041254		4175.37	0.04440398
465.6	-0.01198696		995.59	-0.00206336		1525.59	0.02219625		2055.58	0.02428981		2585.58	0.00177438		3115.57	0.00887396		3645.57	0.00035115		4175.57	0.04381421
465.8	-0.01270326		995.79	-0.0029909		1525.79	0.02218427		2055.78	0.02353775		2585.78	0.00094051		3115.77	0.00767446		3645.77	0.00059353		4175.77	0.04387611
466	-0.01411416		995.99	-0.00384865		1525.99	0.02225034		2055.98	0.02351968		2585.98	0.0007018		3115.97	0.00688977		3645.97	0.00050557		4175.97	0.0434796
466.2	-0.01474275		996.19	-0.00452103		1526.19	0.02258665		2056.18	0.02431741		2586.18	-0.00002904		3116.17	0.00682148		3646.17	0.00031866		4176.17	0.04420625
466.4	-0.01450885		996.39	-0.00473869		1526.39	0.02287787		2056.38	0.02408821		2586.38	-0.00037519		3116.37	0.00682917		3646.37	0.00056038		4176.37	0.04446647
466.6	-0.01496016		996.59	-0.00527837		1526.59	0.02372232		2056.58	0.0242929		2586.58	-0.00084949		3116.57	0.00701513		3646.57	0.00054485		4176.57	0.04464591
466.8	-0.01574236		996.79	-0.0057288		1526.79	0.02416177		2056.78	0.0250256		2586.78	-0.00122831		3116.77	0.00772096		3646.77	0.00079402		4176.77	0.04438602
467	-0.01600083		996.99	-0.00655333		1526.99	0.02481563		2056.98	0.02497782		2586.98	-0.00208212		3116.97	0.00848113		3646.97	0.00090288		4176.97	0.0449349
467.2	-0.01651032		997.19	-0.00720745		1527.19	0.02539768		2057.18	0.02540451		2587.18	-0.00222833		3117.17	0.00908526		3647.17	0.0018754		4177.17	0.04546511
467.4	-0.01723028		997.39	-0.00808281		1527.39	0.02567301		2057.38	0.02543011		2587.38	-0.00303846		3117.37	0.00941755		3647.37	0.00185276		4177.37	0.04641175
467.6	-0.01847		997.59	-0.00829306		1527.59	0.02554136		2057.58	0.02467149		2587.58	-0.00319024		3117.57	0.01031247		3647.57	0.0027386		4177.57	0.04673499
467.8	-0.01957967		997.79	-0.00873508		1527.79	0.02487021		2057.78	0.02495434		2587.78	-0.00287407		3117.77	0.01212713		3647.77	0.00280017		4177.77	0.04609628
468	-0.01964614		997.99	-0.00922292		1527.99	0.02508229		2057.98	0.02560836		2587.98	-0.00251865		3117.97	0.01201599		3647.97	0.00199973		4177.97	0.04586617
468.2	-0.02011307		998.19	-0.00948515		1528.19	0.02482513		2058.18	0.02474197		2588.18	-0.00218409		3118.17	0.01205782		3648.17	0.00228732		4178.17	0.04655268
468.4	-0.02110839		998.39	-0.00971845		1528.39	0.02480496		2058.38	0.02532167		2588.38	-0.00228575		3118.37	0.01239242		3648.37	0.00245122		4178.37	0.0461719
468.6	-0.02122155		998.59	-0.00951526		1528.59	0.02487735		2058.58	0.02560119		2588.58	-0.00126226		3118.57	0.01254195		3648.57	0.00252327		4178.57	0.045216
468.8	-0.02061002		998.79	-0.00950557		1528.79	0.0245909		2058.78	0.02576233		2588.78	-0.00092044		3118.77	0.01245819		3648.77	0.00255789		4178.77	0.04449243
469	-0.02018546		998.99	-0.00871251		1528.99	0.02461159		2058.98	0.02515016		2588.98	0.00082214		3118.97	0.01196613		3648.97	0.00190438		4178.97	0.04401409
469.2	-0.02006972		999.19	-0.00822044		1529.19	0.02422918		2059.18	0.0247927		2589.18	0.00108584		3119.17	0.01282343		3649.17	0.00198584		4179.17	0.04414622
469.4	-0.0194045		999.39	-0.00784036		1529.39	0.02404769		2059.38	0.02515855		2589.38	0.00128443		3119.37	0.01164798		3649.37	0.00217792		4179.37	0.04303504
469.6	-0.0193569		999.59	-0.00706071		1529.59	0.02329813		2059.58	0.02430565		2589.58	0.00129867		3119.57	0.01141292		3649.57	0.00209003		4179.57	0.04312954
469.8	-0.0191909		999.79	-0.00708627		1529.79	0.0222217		2059.78	0.02324534		2589.78	0.0020239		3119.77	0.01007218		3649.77	0.00183631		4179.77	0.04327532
470	-0.01904013		999.99	-0.00698371		1529.99	0.02187987		2059.98	0.02355361		2589.98	0.00251198		3119.97	0.01041065		3649.97	0.00121359		4179.97	0.04384143
470.2	-0.01832082		1000.19	-0.00694873		1530.19	0.02192847		2060.18	0.02354032		2590.18	0.00248705		3120.17	0.01020256		3650.17	0.00141536		4180.17	0.0435688
470.4	-0.01782854		1000.39	-0.00670054		1530.39	0.02233401		2060.38	0.02343891		2590.38	0.00167098		3120.37	0.01010636		3650.37	0.00162751		4180.37	0.04343318
470.6	-0.01835507		1000.59	-0.00635086		1530.59	0.02281655		2060.58	0.02413336		2590.58	0.00139773		3120.57	0.01027038		3650.57	0.00148725		4180.57	0.04329557
470.8	-0.01759598		1000.79	-0.00661915		1530.79	0.02251969		2060.78	0.02362542		2590.78	0.00128429		3120.77	0.01068411		3650.77	0.00239579		4180.77	0.04322939
471	-0.01659973		1000.99	-0.00643486		1530.99	0.02216645		2060.98	0.02298502		2590.98	0.00010453		3120.97	0.01075087		3650.97	0.00217778		4180.97	0.04311971
471.2	-0.01679687		1001.19	-0.00666675		1531.19	0.02207064		2061.18	0.0230332		2591.18	-0.00069268		3121.17	0.01000529		3651.17	0.00209404		4181.17	0.04319648
471.4	-0.01654861		1001.39	-0.00792791		1531.39	0.02227157		2061.38	0.02244894		2591.38	-0.00079382		3121.37	0.00992085		3651.37	0.00282021		4181.37	0.04281747
471.6	-0.01670137		1001.59	-0.00861727		1531.59	0.02204194		2061.58	0.02212855		2591.58	-0.00104576		3121.57	0.01017314		3651.57	0.00278204		4181.57	0.04238516
471.8	-0.01696351		1001.79	-0.0085972		1531.79	0.02188446		2061.78	0.02276954		2591.78	-0.00266319		3121.77	0.01030763		3651.77	0.00231459		4181.77	0.04174782
472	-0.01673425		1001.99	-0.00842156		1531.99	0.0229585		2061.98	0.02303678		2591.98	-0.00216349		3121.97	0.00925588		3651.97	0.00231716		4181.97	0.0423216
472.2	-0.01763165		1002.19	-0.00811147		1532.19	0.02290419		2062.18	0.0242542		2592.18	-0.00204238		3122.17	0.00919875		3652.17	0.00217363		4182.17	0.04254495
472.4	-0.01776628		1002.39	-0.00837486		1532.39	0.0235319		2062.38	0.02485285		2592.38	-0.00203275		3122.37	0.00973753		3652.37	0.0018739		4182.37	0.0421858
472.6	-0.01792855		1002.59	-0.00775932		1532.59	0.02330853		2062.58	0.02591423		2592.58	-0.00077402		3122.57	0.01003696		3652.57	0.00177247		4182.57	0.04185746
472.8	-0.01813549		1002.79	-0.0070314		1532.79	0.02317834		2062.78	0.02583951		2592.78	-0.00039697		3122.77	0.00984073		3652.77	0.00203088		4182.77	0.04214772
473	-0.01789904		1002.99	-0.00627859		1532.99	0.02303661		2062.98	0.02572083		2592.98	0.00129358		3122.97	0.01023444		3652.97	0.00084411		4182.97	0.04263492
473.2	-0.01802723		1003.19	-0.00532835		1533.19	0.02241519		2063.18	0.02602284		2593.18	0.00165136		3123.17	0.01111213		3653.17	0.00169357		4183.17	0.0431109
473.4	-0.01783965		1003.39	-0.00522397		1533.39	0.02189849		2063.38	0.0257259		2593.38	0.00263683		3123.37	0.01151125		3653.37	0.00231543		4183.37	0.04300189
473.6	-0.01832293		1003.59	-0.00471221		1533.59	0.02122531		2063.58	0.02520282		2593.58	0.00356257		3123.57	0.01129626		3653.57	0.00188293		4183.57	0.04315656
473.8	-0.01755754		1003.79	-0.00524256		1533.79	0.02088662		2063.78	0.02578476		2593.78	0.00461885		3123.77	0.01063512		3653.77	0.00180388		4183.77	0.04318208
474	-0.01747087		1003.99	-0.00448652		1533.99	0.02134714		2063.98	0.02578337		2593.98	0.00490512		3123.97	0.0111698		3653.97	0.00220382		4183.97	0.04277973
474.2	-0.01750387		1004.19	-0.00520226		1534.19	0.02152771		2064.18	0.02511097		2594.18	0.00438906		3124.17	0.01187356		3654.17	0.00280612		4184.17	0.04189241
474.4	-0.01737633		1004.39	-0.00550252		1534.39	0.02181893		2064.38	0.02509312		2594.38	0.00299172		3124.37	0.01176636		3654.37	0.00251765		4184.37	0.04221984
474.6	-0.01708928		1004.59	-0.00502731		1534.59	0.02152287		2064.58	0.02475086		2594.58	0.00295942		3124.57	0.01199493		3654.57	0.00317487		4184.57	0.04153797
474.8	-0.01596683		1004.79	-0.00615997		1534.79	0.02196508		2064.78	0.02432884		2594.78	0.0022473		3124.77	0.01199666		3654.77	0.00313971		4184.77	0.04187934
475	-0.01607139		1004.99	-0.00635183		1534.99	0.02260568		2064.98	0.02432244		2594.98	0.00138903		3124.97	0.01183683		3654.97	0.00273194		4184.97	0.04187179
475.2	-0.01605487		1005.19	-0.00712397		1535.19	0.02359192		2065.18	0.02381086		2595.18	0.0009278		3125.17	0.01214362		3655.17	0.00320418		4185.17	0.04298478
475.4	-0.01521266		1005.39	-0.00788784		1535.39	0.0242515		2065.38	0.02279212		2595.38	0.00067923		3125.37	0.01193024		3655.37	0.0038284		4185.37	0.04308676
475.6	-0.01557324		1005.59	-0.00854237		1535.59	0.02348899		2065.58	0.02256828		2595.58	-0.00027968		3125.57	0.01131855		3655.57	0.00345643		4185.57	0.04368959
475.8	-0.01608192		1005.79	-0.00880597		1535.79	0.02406		2065.78	0.02272701		2595.78	-0.00086957		3125.77	0.01085515		3655.77	0.0032561		4185.77	0.04343964
476	-0.01628481		1005.99	-0.00944366		1535.99	0.02462136		2065.98	0.02241918		2595.98	-0.00031607		3125.97	0.01121443		3655.97	0.00333705		4185.97	0.04365287
476.2	-0.01651777		1006.19	-0.00955574		1536.19	0.02447336		2066.18	0.02312565		2596.18	-0.00017279		3126.17	0.01156091		3656.17	0.00259143		4186.17	0.04374434
476.4	-0.01686419		1006.39	-0.00992586		1536.39	0.02408665		2066.38	0.02204495		2596.38	-0.00086456		3126.37	0.01187984		3656.37	0.00184299		4186.37	0.04458676
476.6	-0.01776979		1006.59	-0.00897167		1536.59	0.02352473		2066.58	0.02265302		2596.58	-0.00076278		3126.57	0.01046314		3656.57	0.00162899		4186.57	0.04456235
476.8	-0.0181471		1006.79	-0.00817433		1536.79	0.0232437		2066.78	0.02206608		2596.78	-0.00013685		3126.77	0.00969713		3656.77	0.00186857		4186.77	0.04521938
477	-0.0186866		1006.99	-0.00785306		1536.99	0.02252894		2066.98	0.0230177		2596.98	-0.00008936		3126.97	0.0102304		3656.97	0.00121779		4186.97	0.0453408
477.2	-0.0199597		1007.19	-0.00758125		1537.19	0.02208135		2067.18	0.02283017		2597.18	-0.00040217		3127.17	0.01012592		3657.17	0.00118767		4187.17	0.04491063
477.4	-0.01996833		1007.39	-0.00740841		1537.39	0.02253817		2067.38	0.02308913		2597.38	-0.00045219		3127.37	0.00962613		3657.37	0.00031718		4187.37	0.04492464
477.6	-0.01935959		1007.59	-0.00784037		1537.59	0.02210921		2067.58	0.02414862		2597.58	-0.00088152		3127.57	0.00916986		3657.57	-0.00076111		4187.57	0.04499434
477.8	-0.01916419		1007.79	-0.0076918		1537.79	0.02191544		2067.78	0.02393699		2597.78	-0.00128051		3127.77	0.00939846		3657.77	0.00010287		4187.77	0.04486072
478	-0.0194367		1007.99	-0.00769865		1537.99	0.02164272		2067.98	0.02380077		2597.98	-0.00177763		3127.97	0.00910945		3657.97	-0.00019464		4187.97	0.04519404
478.2	-0.01965013		1008.19	-0.00814243		1538.19	0.02161979		2068.18	0.02408149		2598.18	-0.00275758		3128.17	0.00871412		3658.17	-0.00030249		4188.17	0.04526822
478.4	-0.01985546		1008.39	-0.00814476		1538.39	0.02211308		2068.38	0.02506713		2598.38	-0.00388432		3128.37	0.0085408		3658.37	-0.00054981		4188.37	0.04503137
478.6	-0.01924063		1008.59	-0.00748867		1538.59	0.02246687		2068.58	0.02527742		2598.58	-0.00376205		3128.57	0.0084239		3658.57	-0.000373		4188.57	0.04449925
478.8	-0.0195688		1008.79	-0.00763282		1538.79	0.02279634		2068.78	0.02544068		2598.78	-0.00351362		3128.77	0.00808655		3658.77	-0.00024816		4188.77	0.0447876
479	-0.01916555		1008.99	-0.00642369		1538.99	0.02258301		2068.98	0.02537481		2598.98	-0.00309672		3128.97	0.00913374		3658.97	0.00041573		4188.97	0.04492364
479.2	-0.0186506		1009.19	-0.00628412		1539.19	0.02224281		2069.18	0.02540589		2599.18	-0.00273689		3129.17	0.0095015		3659.17	0.00044848		4189.17	0.04539141
479.4	-0.01889874		1009.39	-0.00695247		1539.39	0.0215235		2069.38	0.02524052		2599.38	-0.00261637		3129.37	0.00901497		3659.37	0.00023615		4189.37	0.04563159
479.6	-0.02007874		1009.59	-0.00716441		1539.59	0.02110505		2069.58	0.02521489		2599.58	-0.0021653		3129.57	0.00877984		3659.57	-0.00024562		4189.57	0.04493065
479.8	-0.02037527		1009.79	-0.00704184		1539.79	0.02152762		2069.78	0.02480751		2599.78	-0.00126016		3129.77	0.00962645		3659.77	-0.00065608		4189.77	0.04519241
480	-0.0205272		1009.99	-0.00685953		1539.99	0.02108465		2069.98	0.02441445		2599.98	-0.00041918		3129.97	0.00990475		3659.97	-0.00054399		4189.97	0.04558946
480.2	-0.02145691		1010.19	-0.00690899		1540.19	0.02098219		2070.18	0.02388098		2600.18	-0.00130182		3130.17	0.00992277		3660.17	-0.0009139		4190.17	0.04553002
480.4	-0.02266218		1010.39	-0.00636148		1540.39	0.02136638		2070.38	0.02265815		2600.38	-0.00135082		3130.37	0.01011382		3660.37	-0.00082274		4190.37	0.04532462
480.6	-0.02346809		1010.59	-0.00694871		1540.59	0.02195557		2070.58	0.02300569		2600.58	-0.0010954		3130.57	0.00950244		3660.57	-0.00067685		4190.57	0.04476442
480.8	-0.02398457		1010.79	-0.00728226		1540.79	0.02181553		2070.78	0.02245346		2600.78	-0.00066164		3130.77	0.0095396		3660.77	-0.00041394		4190.77	0.04437257
481	-0.02403477		1010.99	-0.00796358		1540.99	0.02163486		2070.98	0.02253661		2600.98	-0.00117014		3130.97	0.01067748		3660.97	-0.00104823		4190.97	0.04326523
481.2	-0.02370118		1011.19	-0.00817945		1541.19	0.02114738		2071.18	0.02274275		2601.18	-0.00085942		3131.17	0.01016917		3661.17	-0.00240841		4191.17	0.04277024
481.4	-0.02245198		1011.39	-0.00840494		1541.39	0.02228685		2071.38	0.0231962		2601.38	-0.00095461		3131.37	0.01012976		3661.37	-0.0021732		4191.37	0.04316232
481.6	-0.02231978		1011.59	-0.00903078		1541.59	0.02158639		2071.58	0.0229091		2601.58	-0.00155221		3131.57	0.01065183		3661.57	-0.0023809		4191.57	0.04288479
481.8	-0.02227228		1011.79	-0.0083802		1541.79	0.02137926		2071.78	0.02249563		2601.78	-0.0015205		3131.77	0.01042371		3661.77	-0.00165121		4191.77	0.04208905
482	-0.02093995		1011.99	-0.00853487		1541.99	0.02104441		2071.98	0.02278088		2601.98	-0.0016725		3131.97	0.01016958		3661.97	-0.00217288		4191.97	0.04243283
482.2	-0.02144122		1012.19	-0.0080317		1542.19	0.02173358		2072.18	0.02347639		2602.18	-0.00275054		3132.17	0.00999253		3662.17	-0.00164811		4192.17	0.04178338
482.4	-0.02048321		1012.39	-0.0078694		1542.39	0.02198785		2072.38	0.02324148		2602.38	-0.00240111		3132.37	0.01022975		3662.37	-0.00177402		4192.37	0.04163202
482.6	-0.01955802		1012.59	-0.00737574		1542.59	0.02135036		2072.58	0.0223862		2602.58	-0.00183447		3132.57	0.00990815		3662.57	-0.00175625		4192.57	0.04066911
482.8	-0.01935718		1012.79	-0.0063347		1542.79	0.02121036		2072.78	0.02299725		2602.78	-0.00136505		3132.77	0.01017619		3662.77	-0.00012871		4192.77	0.04177011
483	-0.01766881		1012.99	-0.00583891		1542.99	0.02147663		2072.98	0.02310689		2602.98	-0.00153447		3132.97	0.01059277		3662.97	-0.00004131		4192.97	0.04257617
483.2	-0.01848611		1013.19	-0.00630257		1543.19	0.02071421		2073.18	0.02342966		2603.18	-0.00114898		3133.17	0.00969804		3663.17	0.00070165		4193.17	0.04288218
483.4	-0.01830583		1013.39	-0.00612565		1543.39	0.02111499		2073.38	0.0230542		2603.38	-0.00140326		3133.37	0.00925287		3663.37	0.00148069		4193.37	0.0431152
483.6	-0.01859671		1013.59	-0.00624803		1543.59	0.02185663		2073.58	0.02322438		2603.58	-0.00135921		3133.57	0.009362		3663.57	0.00238704		4193.57	0.0426908
483.8	-0.01834831		1013.79	-0.00637407		1543.79	0.02229097		2073.78	0.02337006		2603.78	-0.0009903		3133.77	0.00992266		3663.77	0.00223592		4193.77	0.04386956
484	-0.01760162		1013.99	-0.00634822		1543.99	0.02296079		2073.98	0.02286769		2603.98	-0.00161689		3133.97	0.00872548		3663.97	0.00228914		4193.97	0.04357292
484.2	-0.01852404		1014.19	-0.00736637		1544.19	0.02485331		2074.18	0.02255072		2604.18	-0.00266683		3134.17	0.00887604		3664.17	0.00209593		4194.17	0.04286693
484.4	-0.01839175		1014.39	-0.00805966		1544.39	0.02568179		2074.38	0.02242064		2604.38	-0.0025402		3134.37	0.0090493		3664.37	0.00236481		4194.37	0.0429865
484.6	-0.01812462		1014.59	-0.00912688		1544.59	0.02510962		2074.58	0.02247247		2604.58	-0.00273758		3134.57	0.00890633		3664.57	0.00241597		4194.57	0.04365924
484.8	-0.01825571		1014.79	-0.00952872		1544.79	0.02424186		2074.78	0.02202903		2604.78	-0.00260377		3134.77	0.00886844		3664.77	0.00317628		4194.77	0.0437975
485	-0.01777949		1014.99	-0.00998873		1544.99	0.02359458		2074.98	0.02236682		2604.98	-0.00204464		3134.97	0.00954743		3664.97	0.00296917		4194.97	0.04386948
485.2	-0.01804536		1015.19	-0.0097397		1545.19	0.02325894		2075.18	0.02273809		2605.18	-0.00187118		3135.17	0.00911597		3665.17	0.00269102		4195.17	0.04341617
485.4	-0.0180064		1015.39	-0.01010526		1545.39	0.02335054		2075.38	0.0214879		2605.38	-0.00175347		3135.37	0.0093172		3665.37	0.00326415		4195.37	0.04348821
485.6	-0.017627		1015.59	-0.00991468		1545.59	0.02199512		2075.58	0.02195043		2605.58	-0.00139478		3135.57	0.00918443		3665.57	0.00247595		4195.57	0.043267
485.8	-0.01796065		1015.79	-0.01029016		1545.79	0.02117745		2075.78	0.02227833		2605.78	-0.00116298		3135.77	0.00845182		3665.77	0.00291821		4195.77	0.04260728
486	-0.01894343		1015.99	-0.01085109		1545.99	0.02110139		2075.98	0.02229572		2605.98	-0.00133066		3135.97	0.00911184		3665.97	0.00209306		4195.97	0.04297808
486.2	-0.02013233		1016.19	-0.01093062		1546.19	0.02109454		2076.18	0.02283313		2606.18	-0.00114971		3136.17	0.00868079		3666.17	0.00175572		4196.17	0.04243114
486.4	-0.01979816		1016.39	-0.01056481		1546.39	0.02025978		2076.38	0.02233433		2606.38	-0.00020939		3136.37	0.00823428		3666.37	0.00184401		4196.37	0.04221293
486.6	-0.02015779		1016.59	-0.01064783		1546.59	0.01957126		2076.58	0.02292167		2606.58	-0.0000151		3136.57	0.00795858		3666.57	0.00127037		4196.57	0.04184976
486.8	-0.02088023		1016.79	-0.01004077		1546.79	0.01982585		2076.78	0.02338132		2606.78	-0.00007046		3136.77	0.00790367		3666.77	0.00162304		4196.77	0.04234444
487	-0.02072835		1016.99	-0.00993895		1546.99	0.01964787		2076.98	0.02392992		2606.98	-0.00001784		3136.97	0.0069219		3666.97	0.00129154		4196.97	0.04154814
487.2	-0.02143888		1017.19	-0.00933803		1547.19	0.01963573		2077.18	0.02470588		2607.18	0.00045851		3137.17	0.00743678		3667.17	0.00168611		4197.17	0.0408042
487.4	-0.0215191		1017.39	-0.00949852		1547.39	0.02038198		2077.38	0.02498951		2607.38	0.00023098		3137.37	0.00816612		3667.37	0.00064183		4197.37	0.04101402
487.6	-0.02142205		1017.59	-0.01067963		1547.59	0.0212737		2077.58	0.0263365		2607.58	-0.00030423		3137.57	0.00870418		3667.57	-0.00039048		4197.57	0.04064764
487.8	-0.0211141		1017.79	-0.0102282		1547.79	0.02184095		2077.78	0.02628466		2607.78	-0.00042792		3137.77	0.00848907		3667.77	-0.0012501		4197.77	0.04071043
488	-0.02031417		1017.99	-0.01000397		1547.99	0.02253666		2077.98	0.02571317		2607.98	-0.00097337		3137.97	0.00857334		3667.97	-0.00133935		4197.97	0.04073436
488.2	-0.02061792		1018.19	-0.01020216		1548.19	0.02350268		2078.18	0.02608291		2608.18	-0.00140646		3138.17	0.0088581		3668.17	-0.00145678		4198.17	0.04068812
488.4	-0.02032224		1018.39	-0.00917759		1548.39	0.02273269		2078.38	0.02554843		2608.38	-0.00153248		3138.37	0.00978658		3668.37	-0.00093808		4198.37	0.04173178
488.6	-0.02046795		1018.59	-0.00864353		1548.59	0.02223469		2078.58	0.02520336		2608.58	-0.00135851		3138.57	0.01047068		3668.57	0.00016139		4198.57	0.04317599
488.8	-0.01999689		1018.79	-0.00893189		1548.79	0.02221375		2078.78	0.02424903		2608.78	-0.00230803		3138.77	0.01048513		3668.77	0.00023393		4198.77	0.04335653
489	-0.01987856		1018.99	-0.00876494		1548.99	0.02239301		2078.98	0.02388234		2608.98	-0.00209814		3138.97	0.01068431		3668.97	0.00032922		4198.97	0.04299687
489.2	-0.01955093		1019.19	-0.00812898		1549.19	0.02206779		2079.18	0.02353669		2609.18	-0.00277674		3139.17	0.01092607		3669.17	0.00041318		4199.17	0.04296141
489.4	-0.01908207		1019.39	-0.00828875		1549.39	0.0217128		2079.38	0.02347582		2609.38	-0.0018901		3139.37	0.01083071		3669.37	0.00026297		4199.37	0.04386346
489.6	-0.01947243		1019.59	-0.00757237		1549.59	0.0219601		2079.58	0.02362817		2609.58	-0.00152906		3139.57	0.00948733		3669.57	-0.00029218		4199.57	0.04372745
489.8	-0.02045118		1019.79	-0.00688133		1549.79	0.0217384		2079.78	0.02317121		2609.78	-0.00133184		3139.77	0.00921999		3669.77	0.00024148		4199.77	0.04362049
490	-0.02068303		1019.99	-0.00702744		1549.99	0.02216292		2079.98	0.0222373		2609.98	-0.00113798		3139.97	0.0096411		3669.97	0.00046279		4199.97	0.04341949
490.2	-0.02014075		1020.19	-0.00694429		1550.19	0.02172184		2080.18	0.02174784		2610.18	-0.00085935		3140.17	0.0087538		3670.17	0.0008916		4200.17	0.04316012
490.4	-0.01996978		1020.39	-0.00645065		1550.39	0.02086111		2080.38	0.02157253		2610.38	-0.00025593		3140.37	0.00780297		3670.37	0.00142824		4200.37	0.04374812
490.6	-0.01981947		1020.59	-0.00633761		1550.59	0.02028005		2080.58	0.02156403		2610.58	0.00046845		3140.57	0.00762083		3670.57	0.00117609		4200.57	0.04355565
490.8	-0.02026007		1020.79	-0.00637061		1550.79	0.02009685		2080.78	0.02142761		2610.78	-0.00011212		3140.77	0.00730905		3670.77	0.00146522		4200.77	0.04370173
491	-0.02007588		1020.99	-0.00586012		1550.99	0.02000449		2080.98	0.02205574		2610.98	-0.00015234		3140.97	0.00702249		3670.97	0.00098054		4200.97	0.04346226
491.2	-0.02008604		1021.19	-0.00681891		1551.19	0.01989131		2081.18	0.02198067		2611.18	0.00038301		3141.17	0.0081298		3671.17	-0.00005228		4201.17	0.04292599
491.4	-0.02062022		1021.39	-0.00844994		1551.39	0.01917185		2081.38	0.02259045		2611.38	0.00028278		3141.37	0.00810825		3671.37	-0.00035995		4201.37	0.04313908
491.6	-0.02026908		1021.59	-0.00822406		1551.59	0.01921904		2081.58	0.0229736		2611.58	0.00074864		3141.57	0.00820588		3671.57	0.00003805		4201.57	0.04288689
491.8	-0.02079967		1021.79	-0.00743008		1551.79	0.01841102		2081.78	0.02229063		2611.78	0.00082885		3141.77	0.00778508		3671.77	0.00066228		4201.77	0.04269005
492	-0.02077102		1021.99	-0.00770126		1551.99	0.01843868		2081.98	0.02154396		2611.98	0.00043277		3141.97	0.00764792		3671.97	0.00055033		4201.97	0.0426986
492.2	-0.02100734		1022.19	-0.00791661		1552.19	0.01873309		2082.18	0.02163338		2612.18	0.00012627		3142.17	0.00750803		3672.17	0.0005741		4202.17	0.04235916
492.4	-0.021781		1022.39	-0.00799531		1552.39	0.01839842		2082.38	0.02181661		2612.38	0.00100916		3142.37	0.00792552		3672.37	0.00059822		4202.37	0.04257495
492.6	-0.0224715		1022.59	-0.00902669		1552.59	0.01862679		2082.58	0.02129266		2612.58	0.00045202		3142.57	0.00837115		3672.57	-0.00004533		4202.57	0.04220696
492.8	-0.02179541		1022.79	-0.00929636		1552.79	0.01880022		2082.78	0.02060408		2612.78	0.00023557		3142.77	0.00856573		3672.77	-0.00120438		4202.77	0.04136791
493	-0.0223157		1022.99	-0.00903581		1552.99	0.01919242		2082.98	0.02189122		2612.98	0.00023561		3142.97	0.00945647		3672.97	-0.00120927		4202.97	0.04069752
493.2	-0.021811		1023.19	-0.0083276		1553.19	0.01975571		2083.18	0.02310854		2613.18	-0.00005349		3143.17	0.00941434		3673.17	-0.0010627		4203.17	0.03995542
493.4	-0.02211276		1023.39	-0.00786881		1553.39	0.02059388		2083.38	0.02360409		2613.38	0.00076642		3143.37	0.00879498		3673.37	-0.00112791		4203.37	0.03954249
493.6	-0.02267241		1023.59	-0.00743702		1553.59	0.02107477		2083.58	0.02404287		2613.58	0.00013608		3143.57	0.00845206		3673.57	-0.0006169		4203.57	0.0385422
493.8	-0.02185014		1023.79	-0.00739626		1553.79	0.02116203		2083.78	0.02502823		2613.78	0.000284		3143.77	0.00939687		3673.77	0.00049503		4203.77	0.03867912
494	-0.021639		1023.99	-0.00810181		1553.99	0.02159267		2083.98	0.02459972		2613.98	-0.00006708		3143.97	0.00948752		3673.97	0.00134852		4203.97	0.03921069
494.2	-0.02129079		1024.19	-0.00769043		1554.19	0.02224901		2084.18	0.0252766		2614.18	-0.00022887		3144.17	0.00871063		3674.17	0.00175982		4204.17	0.03980731
494.4	-0.02098369		1024.39	-0.0064139		1554.39	0.02247169		2084.38	0.02483733		2614.38	-0.00039679		3144.37	0.00853928		3674.37	0.00246412		4204.37	0.04040721
494.6	-0.0210776		1024.59	-0.00673305		1554.59	0.02258762		2084.58	0.0241994		2614.58	-0.00123952		3144.57	0.00842071		3674.57	0.00271939		4204.57	0.04058946
494.8	-0.02092645		1024.79	-0.00656958		1554.79	0.02263753		2084.78	0.02412525		2614.78	-0.00251076		3144.77	0.00828794		3674.77	0.00223783		4204.77	0.04139091
495	-0.02059606		1024.99	-0.00675755		1554.99	0.02214478		2084.98	0.02432275		2614.98	-0.00240947		3144.97	0.0083159		3674.97	0.00269996		4204.97	0.04116036
495.2	-0.02014781		1025.19	-0.00697209		1555.19	0.02148095		2085.18	0.02427635		2615.18	-0.00258964		3145.17	0.00819988		3675.17	0.00305012		4205.17	0.04180232
495.4	-0.02039898		1025.39	-0.00683133		1555.39	0.02026132		2085.38	0.02363491		2615.38	-0.0028507		3145.37	0.00800383		3675.37	0.00302817		4205.37	0.04284146
495.6	-0.0204571		1025.59	-0.00631636		1555.59	0.02008764		2085.58	0.0231103		2615.58	-0.00257725		3145.57	0.00760179		3675.57	0.00294239		4205.57	0.04342461
495.8	-0.02031842		1025.79	-0.00659821		1555.79	0.02009669		2085.78	0.02238795		2615.78	-0.00325434		3145.77	0.00654734		3675.77	0.00242711		4205.77	0.04300786
496	-0.02008193		1025.99	-0.00721897		1555.99	0.01999731		2085.98	0.02143017		2615.98	-0.00386931		3145.97	0.00653572		3675.97	0.00174716		4205.97	0.04327504
496.2	-0.02050739		1026.19	-0.00825505		1556.19	0.01994879		2086.18	0.02117324		2616.18	-0.00341344		3146.17	0.00726462		3676.17	0.00104247		4206.17	0.04316804
496.4	-0.02185883		1026.39	-0.00841772		1556.39	0.02005243		2086.38	0.02018913		2616.38	-0.0025137		3146.37	0.00741458		3676.37	0.00004953		4206.37	0.0434581
496.6	-0.02196809		1026.59	-0.00912892		1556.59	0.01984225		2086.58	0.01895367		2616.58	-0.0030007		3146.57	0.00793599		3676.57	-0.00067373		4206.57	0.04339601
496.8	-0.02171052		1026.79	-0.00941357		1556.79	0.02000353		2086.78	0.01870653		2616.78	-0.00301101		3146.77	0.00831131		3676.77	-0.00113422		4206.77	0.04316846
497	-0.02172348		1026.99	-0.00897057		1556.99	0.02011996		2086.98	0.01940254		2616.98	-0.0035157		3146.97	0.00884826		3676.97	-0.00088564		4206.97	0.04250908
497.2	-0.02131278		1027.19	-0.00973925		1557.19	0.02009126		2087.18	0.01981358		2617.18	-0.00380295		3147.17	0.0087656		3677.17	-0.00101202		4207.17	0.04195647
497.4	-0.02151956		1027.39	-0.01021909		1557.39	0.02029503		2087.38	0.01940668		2617.38	-0.00460285		3147.37	0.00976057		3677.37	-0.00098588		4207.37	0.04187824
497.6	-0.0214863		1027.59	-0.01063994		1557.59	0.02012416		2087.58	0.01950927		2617.58	-0.00470761		3147.57	0.01053711		3677.57	-0.00052535		4207.57	0.04143823
497.8	-0.02159784		1027.79	-0.01077279		1557.79	0.0206996		2087.78	0.01924757		2617.78	-0.00439623		3147.77	0.01102578		3677.77	0.00020395		4207.77	0.04155078
498	-0.02310522		1027.99	-0.01043217		1557.99	0.02095432		2087.98	0.01887583		2617.98	-0.0041186		3147.97	0.01039536		3677.97	-0.00043512		4207.97	0.04229824
498.2	-0.02339912		1028.19	-0.01019447		1558.19	0.02190873		2088.18	0.01941503		2618.18	-0.00335806		3148.17	0.01034494		3678.17	-0.00038061		4208.17	0.04163906
498.4	-0.02321911		1028.39	-0.00972698		1558.39	0.02200432		2088.38	0.0192481		2618.38	-0.00456092		3148.37	0.01037789		3678.37	0.00042488		4208.37	0.04124817
498.6	-0.02294102		1028.59	-0.00948193		1558.59	0.02082614		2088.58	0.01980776		2618.58	-0.00457176		3148.57	0.00953112		3678.57	0.00022359		4208.57	0.04105733
498.8	-0.0228073		1028.79	-0.00885747		1558.79	0.02026028		2088.78	0.02022093		2618.78	-0.0039923		3148.77	0.00906569		3678.77	0.00053545		4208.77	0.04085431
499	-0.0227481		1028.99	-0.00877695		1558.99	0.01976543		2088.98	0.02116517		2618.98	-0.00385391		3148.97	0.00922443		3678.97	0.0011489		4208.97	0.04112905
499.2	-0.02223795		1029.19	-0.00819877		1559.19	0.02003463		2089.18	0.02163763		2619.18	-0.00421837		3149.17	0.00910259		3679.17	0.00102605		4209.17	0.04152581
499.4	-0.02169614		1029.39	-0.00804133		1559.39	0.01924508		2089.38	0.02203234		2619.38	-0.00430409		3149.37	0.00829694		3679.37	0.00037684		4209.37	0.04191363
499.6	-0.02165631		1029.59	-0.0075909		1559.59	0.0202274		2089.58	0.02281446		2619.58	-0.00437338		3149.57	0.00797005		3679.57	0.00062907		4209.57	0.04181499
499.8	-0.02129234		1029.79	-0.00745861		1559.79	0.02019681		2089.78	0.02236906		2619.78	-0.00353416		3149.77	0.00766279		3679.77	0.00054084		4209.77	0.04212312
500	-0.02033875		1029.99	-0.00760792		1559.99	0.01959969		2089.98	0.0224411		2619.98	-0.00360221		3149.97	0.00733554		3679.97	0.00092812		4209.97	0.04263536
500.2	-0.02040784		1030.19	-0.0079168		1560.19	0.02061344		2090.18	0.02290252		2620.18	-0.0031221		3150.17	0.0068191		3680.17	0.00072367		4210.17	0.04261152
500.4	-0.02066213		1030.39	-0.0070944		1560.39	0.02070662		2090.38	0.0211247		2620.38	-0.00318724		3150.37	0.00629542		3680.37	0.00070331		4210.37	0.04277297
500.6	-0.01980634		1030.59	-0.00788179		1560.59	0.02112595		2090.58	0.02104066		2620.58	-0.00295154		3150.57	0.00572519		3680.57	0.00035108		4210.57	0.04252251
500.8	-0.01992634		1030.79	-0.00812435		1560.79	0.02112301		2090.78	0.02078878		2620.78	-0.0027598		3150.77	0.00584327		3680.77	-0.00083073		4210.77	0.04256755
501	-0.01878519		1030.99	-0.00885283		1560.99	0.02108654		2090.98	0.02081627		2620.98	-0.00338387		3150.97	0.00566505		3680.97	-0.00073489		4210.97	0.04260309
501.2	-0.01843575		1031.19	-0.01036815		1561.19	0.02156768		2091.18	0.02007511		2621.18	-0.00396333		3151.17	0.00611866		3681.17	-0.00113419		4211.17	0.04185858
501.4	-0.01838714		1031.39	-0.0103687		1561.39	0.02246707		2091.38	0.01899858		2621.38	-0.00400552		3151.37	0.00649214		3681.37	-0.00128764		4211.37	0.04122327
501.6	-0.01881716		1031.59	-0.01064853		1561.59	0.02312182		2091.58	0.01788865		2621.58	-0.00366481		3151.57	0.00630555		3681.57	-0.00149999		4211.57	0.04145617
501.8	-0.01919425		1031.79	-0.01072668		1561.79	0.02379201		2091.78	0.0174668		2621.78	-0.00418738		3151.77	0.00590357		3681.77	-0.00217376		4211.77	0.04162011
502	-0.01973161		1031.99	-0.01163532		1561.99	0.02383531		2091.98	0.01765		2621.98	-0.00411396		3151.97	0.00583179		3681.97	-0.00301632		4211.97	0.04142769
502.2	-0.01918671		1032.19	-0.011471		1562.19	0.0243618		2092.18	0.01810348		2622.18	-0.00439797		3152.17	0.00641202		3682.17	-0.00296842		4212.17	0.04105131
502.4	-0.01939777		1032.39	-0.01102179		1562.39	0.02406159		2092.38	0.01782706		2622.38	-0.00550197		3152.37	0.00669359		3682.37	-0.00314085		4212.37	0.04078382
502.6	-0.02003097		1032.59	-0.01098821		1562.59	0.02351085		2092.58	0.01840947		2622.58	-0.00504096		3152.57	0.00707691		3682.57	-0.00394959		4212.57	0.04085601
502.8	-0.02082821		1032.79	-0.01140484		1562.79	0.02410352		2092.78	0.01815497		2622.78	-0.00516978		3152.77	0.0085376		3682.77	-0.00313761		4212.77	0.04155906
503	-0.02080617		1032.99	-0.01116946		1562.99	0.02426651		2092.98	0.01914238		2622.98	-0.00553455		3152.97	0.00924378		3682.97	-0.00283416		4212.97	0.04179395
503.2	-0.02144634		1033.19	-0.01083107		1563.19	0.02378608		2093.18	0.01950009		2623.18	-0.00538839		3153.17	0.00998517		3683.17	-0.0030562		4213.17	0.04211877
503.4	-0.02131925		1033.39	-0.01003672		1563.39	0.02316809		2093.38	0.01963586		2623.38	-0.00467167		3153.37	0.00999884		3683.37	-0.00352475		4213.37	0.04251622
503.6	-0.02112322		1033.59	-0.00984757		1563.59	0.02344349		2093.58	0.01950558		2623.58	-0.00346738		3153.57	0.01132337		3683.57	-0.00300641		4213.57	0.04262594
503.8	-0.02109602		1033.79	-0.00971499		1563.79	0.02268653		2093.78	0.01861372		2623.78	-0.00255092		3153.77	0.01129228		3683.77	-0.002698		4213.77	0.04266921
504	-0.02029505		1033.99	-0.00877515		1563.99	0.02216628		2093.98	0.0189021		2623.98	-0.00246065		3153.97	0.01060366		3683.97	-0.00253617		4213.97	0.04213811
504.2	-0.02111321		1034.19	-0.00808717		1564.19	0.0227625		2094.18	0.01862536		2624.18	-0.00176128		3154.17	0.01047535		3684.17	-0.00306504		4214.17	0.04205566
504.4	-0.02116293		1034.39	-0.00796303		1564.39	0.02228941		2094.38	0.01863568		2624.38	-0.0020592		3154.37	0.00995709		3684.37	-0.00315455		4214.37	0.04190984
504.6	-0.02072317		1034.59	-0.00862197		1564.59	0.02158732		2094.58	0.01979087		2624.58	-0.00156036		3154.57	0.00919248		3684.57	-0.00316444		4214.57	0.04209094
504.8	-0.02125242		1034.79	-0.00906108		1564.79	0.0211527		2094.78	0.02040104		2624.78	-0.00158163		3154.77	0.00830837		3684.77	-0.00296367		4214.77	0.04274659
505	-0.02083113		1034.99	-0.00930773		1564.99	0.02221293		2094.98	0.02064075		2624.98	-0.00243732		3154.97	0.00799873		3684.97	-0.00193505		4214.97	0.04235886
505.2	-0.02105115		1035.19	-0.00928266		1565.19	0.02256907		2095.18	0.01925484		2625.18	-0.00174774		3155.17	0.00769677		3685.17	-0.00129014		4215.17	0.04159443
505.4	-0.02148608		1035.39	-0.00870538		1565.39	0.02247707		2095.38	0.01868311		2625.38	-0.00208364		3155.37	0.00707662		3685.37	-0.00109752		4215.37	0.0422791
505.6	-0.02209899		1035.59	-0.00882206		1565.59	0.02220709		2095.58	0.01817399		2625.58	-0.00329302		3155.57	0.00607176		3685.57	-0.00097572		4215.57	0.04287075
505.8	-0.02227474		1035.79	-0.00851406		1565.79	0.02172687		2095.78	0.01834063		2625.78	-0.00417973		3155.77	0.00538611		3685.77	-0.00081514		4215.77	0.04298565
506	-0.02210241		1035.99	-0.0091552		1565.99	0.02188104		2095.98	0.01899558		2625.98	-0.00528161		3155.97	0.00500997		3685.97	-0.00053398		4215.97	0.04182832
506.2	-0.02220133		1036.19	-0.00802706		1566.19	0.02220389		2096.18	0.01965922		2626.18	-0.00509038		3156.17	0.00439206		3686.17	-0.00064145		4216.17	0.04192248
506.4	-0.02254464		1036.39	-0.00918249		1566.39	0.02212264		2096.38	0.01958122		2626.38	-0.00508069		3156.37	0.00401751		3686.37	-0.00078798		4216.37	0.04152858
506.6	-0.0227464		1036.59	-0.00940663		1566.59	0.02276816		2096.58	0.02014362		2626.58	-0.00535674		3156.57	0.00365317		3686.57	-0.00041259		4216.57	0.04211129
506.8	-0.02319949		1036.79	-0.00834554		1566.79	0.0233245		2096.78	0.02022389		2626.78	-0.00560365		3156.77	0.00397544		3686.77	0.00025347		4216.77	0.04295833
507	-0.02264615		1036.99	-0.00755396		1566.99	0.02259489		2096.98	0.02079523		2626.98	-0.004824		3156.97	0.00411782		3686.97	-0.00053572		4216.97	0.04230947
507.2	-0.02293598		1037.19	-0.00724241		1567.19	0.02164402		2097.18	0.02060957		2627.18	-0.0042114		3157.17	0.00485627		3687.17	-0.00044814		4217.17	0.04209034
507.4	-0.02179593		1037.39	-0.00701943		1567.39	0.02086983		2097.38	0.02098472		2627.38	-0.00389441		3157.37	0.00463278		3687.37	-0.00156323		4217.37	0.04130402
507.6	-0.02125397		1037.59	-0.00784411		1567.59	0.02040425		2097.58	0.02112139		2627.58	-0.0029984		3157.57	0.0048992		3687.57	-0.00229583		4217.57	0.04175288
507.8	-0.02144638		1037.79	-0.00824878		1567.79	0.01948739		2097.78	0.02123492		2627.78	-0.00343119		3157.77	0.00444562		3687.77	-0.00299213		4217.77	0.0421329
508	-0.02062031		1037.99	-0.00699779		1567.99	0.01964722		2097.98	0.02190951		2627.98	-0.00248569		3157.97	0.00416323		3687.97	-0.00380679		4217.97	0.04131433
508.2	-0.02103298		1038.19	-0.0067262		1568.19	0.01986959		2098.18	0.02282173		2628.18	-0.00247822		3158.17	0.00503637		3688.17	-0.0041721		4218.17	0.04074056
508.4	-0.02017406		1038.39	-0.00702993		1568.39	0.0192678		2098.38	0.02365734		2628.38	-0.00277633		3158.37	0.00484724		3688.37	-0.004306		4218.37	0.04043979
508.6	-0.0201539		1038.59	-0.00709938		1568.59	0.01905067		2098.58	0.02362862		2628.58	-0.00256785		3158.57	0.00553945		3688.57	-0.00409146		4218.57	0.04047254
508.8	-0.02073079		1038.79	-0.00778388		1568.79	0.02003221		2098.78	0.02415397		2628.78	-0.00243052		3158.77	0.00550352		3688.77	-0.00346966		4218.77	0.04066097
509	-0.02106107		1038.99	-0.00792471		1568.99	0.01964691		2098.98	0.02361006		2628.98	-0.00257517		3158.97	0.00673464		3688.97	-0.00318771		4218.97	0.04006673
509.2	-0.02107413		1039.19	-0.00852277		1569.19	0.0190724		2099.18	0.02264717		2629.18	-0.00201904		3159.17	0.00742733		3689.17	-0.00300869		4219.17	0.04011035
509.4	-0.02147876		1039.39	-0.00854585		1569.39	0.01861066		2099.38	0.0226436		2629.38	-0.00324602		3159.37	0.00755817		3689.37	-0.0027567		4219.37	0.0405724
509.6	-0.02235028		1039.59	-0.00854892		1569.59	0.01893789		2099.58	0.02278231		2629.58	-0.00415813		3159.57	0.00722124		3689.57	-0.00238031		4219.57	0.04019677
509.8	-0.02249722		1039.79	-0.00845315		1569.79	0.01934728		2099.78	0.02255538		2629.78	-0.00401371		3159.77	0.00769309		3689.77	-0.00157544		4219.77	0.04030377
510	-0.02193698		1039.99	-0.00914726		1569.99	0.01985238		2099.98	0.02244147		2629.98	-0.00458881		3159.97	0.00821914		3689.97	-0.00147687		4219.97	0.03922071
510.2	-0.02251587		1040.19	-0.00924889		1570.19	0.02044971		2100.18	0.02268858		2630.18	-0.00360418		3160.17	0.00777383		3690.17	-0.00116165		4220.17	0.03992676
510.4	-0.02240032		1040.39	-0.0094264		1570.39	0.02050301		2100.38	0.02279164		2630.38	-0.00367988		3160.37	0.0078013		3690.37	-0.00107716		4220.37	0.04089403
510.6	-0.02308938		1040.59	-0.00868434		1570.59	0.021218		2100.58	0.02281192		2630.58	-0.00401969		3160.57	0.00811427		3690.57	-0.00029427		4220.57	0.04212352
510.8	-0.02350129		1040.79	-0.00777792		1570.79	0.02131471		2100.78	0.02313326		2630.78	-0.00385914		3160.77	0.00835575		3690.77	0.00025242		4220.77	0.0425172
511	-0.02306148		1040.99	-0.00771297		1570.99	0.0200132		2100.98	0.02291157		2630.98	-0.00327654		3160.97	0.00846048		3690.97	0.00058457		4220.97	0.04180058
511.2	-0.02366896		1041.19	-0.00797172		1571.19	0.01977884		2101.18	0.02367379		2631.18	-0.00303439		3161.17	0.00749802		3691.17	0.00094285		4221.17	0.0413888
511.4	-0.02412643		1041.39	-0.00883853		1571.39	0.02007924		2101.38	0.02347971		2631.38	-0.00309445		3161.37	0.00705556		3691.37	-0.0000801		4221.37	0.04176103
511.6	-0.02468862		1041.59	-0.0095508		1571.59	0.02027944		2101.58	0.02253686		2631.58	-0.00228799		3161.57	0.00692008		3691.57	0.00001527		4221.57	0.04193323
511.8	-0.02453074		1041.79	-0.0089713		1571.79	0.0205989		2101.78	0.02236954		2631.78	-0.0030556		3161.77	0.00692085		3691.77	-0.00051775		4221.77	0.04124453
512	-0.02499604		1041.99	-0.00798971		1571.99	0.02129409		2101.98	0.02188037		2631.98	-0.00267423		3161.97	0.00663699		3691.97	-0.00101296		4221.97	0.0396876
512.2	-0.02484595		1042.19	-0.00857491		1572.19	0.02019122		2102.18	0.02162426		2632.18	-0.00332088		3162.17	0.00682993		3692.17	-0.00133752		4222.17	0.03871649
512.4	-0.02476689		1042.39	-0.00868963		1572.39	0.01948588		2102.38	0.02113642		2632.38	-0.00345572		3162.37	0.00618941		3692.37	-0.00194643		4222.37	0.03870657
512.6	-0.02471351		1042.59	-0.00891114		1572.59	0.01901223		2102.58	0.02105497		2632.58	-0.00335373		3162.57	0.00566025		3692.57	-0.00216536		4222.57	0.03881374
512.8	-0.02502829		1042.79	-0.00976768		1572.79	0.01778666		2102.78	0.02106736		2632.78	-0.00344431		3162.77	0.00456481		3692.77	-0.00255665		4222.77	0.03944157
513	-0.02519565		1042.99	-0.0094646		1572.99	0.01706783		2102.98	0.02021678		2632.98	-0.00327213		3162.97	0.00511144		3692.97	-0.00336964		4222.97	0.03961148
513.2	-0.02443569		1043.19	-0.00960033		1573.19	0.01745724		2103.18	0.01944444		2633.18	-0.00304356		3163.17	0.00509517		3693.17	-0.00372578		4223.17	0.03920798
513.4	-0.02441085		1043.39	-0.01036825		1573.39	0.01709027		2103.38	0.01899757		2633.38	-0.00374261		3163.37	0.00483107		3693.37	-0.00382256		4223.37	0.03939258
513.6	-0.02391062		1043.59	-0.01051725		1573.59	0.01701372		2103.58	0.01779296		2633.58	-0.00341897		3163.57	0.00559799		3693.57	-0.0041133		4223.57	0.03980409
513.8	-0.02284451		1043.79	-0.01111461		1573.79	0.01653574		2103.78	0.01693049		2633.78	-0.0033658		3163.77	0.00625018		3693.77	-0.00429465		4223.77	0.04047332
514	-0.02211875		1043.99	-0.01086255		1573.99	0.0166067		2103.98	0.01640404		2633.98	-0.00390707		3163.97	0.00634348		3693.97	-0.00432204		4223.97	0.04028872
514.2	-0.02148368		1044.19	-0.0108173		1574.19	0.01718511		2104.18	0.0167674		2634.18	-0.00369025		3164.17	0.0056018		3694.17	-0.00363125		4224.17	0.04109763
514.4	-0.02093472		1044.39	-0.01074355		1574.39	0.01687055		2104.38	0.01644439		2634.38	-0.00365482		3164.37	0.0063962		3694.37	-0.0028872		4224.37	0.04158487
514.6	-0.02073808		1044.59	-0.0108096		1574.59	0.01737504		2104.58	0.01599381		2634.58	-0.00399455		3164.57	0.00649633		3694.57	-0.00198222		4224.57	0.04158864
514.8	-0.02053864		1044.79	-0.01045912		1574.79	0.01710716		2104.78	0.01636057		2634.78	-0.00389468		3164.77	0.00667909		3694.77	-0.00141339		4224.77	0.04146038
515	-0.02070814		1044.99	-0.0108811		1574.99	0.01716849		2104.98	0.01660033		2634.98	-0.00398851		3164.97	0.00713047		3694.97	-0.00102043		4224.97	0.04088913
515.2	-0.02113421		1045.19	-0.01111541		1575.19	0.01811644		2105.18	0.01737524		2635.18	-0.00486269		3165.17	0.00697785		3695.17	-0.00055474		4225.17	0.04051843
515.4	-0.02171111		1045.39	-0.01115699		1575.39	0.0187961		2105.38	0.01662276		2635.38	-0.00561917		3165.37	0.00717936		3695.37	0.00089798		4225.37	0.04060645
515.6	-0.02194028		1045.59	-0.01076679		1575.59	0.01925868		2105.58	0.0160318		2635.58	-0.00546539		3165.57	0.00699966		3695.57	0.00181166		4225.57	0.03969158
515.8	-0.02205735		1045.79	-0.01075084		1575.79	0.02029673		2105.78	0.01682255		2635.78	-0.00571412		3165.77	0.00723343		3695.77	0.00207156		4225.77	0.03899107
516	-0.02275839		1045.99	-0.01110448		1575.99	0.01964606		2105.98	0.01736569		2635.98	-0.00539307		3165.97	0.00693204		3695.97	0.00254777		4225.97	0.03822159
516.2	-0.02327003		1046.19	-0.01067007		1576.19	0.0194785		2106.18	0.01792987		2636.18	-0.00541957		3166.17	0.0065185		3696.17	0.00298436		4226.17	0.03742804
516.4	-0.02420216		1046.39	-0.0099014		1576.39	0.01998567		2106.38	0.01851814		2636.38	-0.00450395		3166.37	0.00628013		3696.37	0.00263339		4226.37	0.03707793
516.6	-0.02511754		1046.59	-0.01023386		1576.59	0.02017843		2106.58	0.01924481		2636.58	-0.00353599		3166.57	0.00544087		3696.57	0.00203951		4226.57	0.03705424
516.8	-0.02655627		1046.79	-0.01042505		1576.79	0.01991663		2106.78	0.02015677		2636.78	-0.00413175		3166.77	0.00510792		3696.77	0.0017111		4226.77	0.03717071
517	-0.02693646		1046.99	-0.01034385		1576.99	0.02087131		2106.98	0.02052527		2636.98	-0.00383316		3166.97	0.00604042		3696.97	0.00189612		4226.97	0.03669709
517.2	-0.02635563		1047.19	-0.01043389		1577.19	0.02044418		2107.18	0.02009993		2637.18	-0.00323217		3167.17	0.00604457		3697.17	0.00177681		4227.17	0.03585478
517.4	-0.02588646		1047.39	-0.010989		1577.39	0.01923227		2107.38	0.02000931		2637.38	-0.0031877		3167.37	0.0056022		3697.37	0.00165748		4227.37	0.03624173
517.6	-0.02476285		1047.59	-0.01018119		1577.59	0.01925343		2107.58	0.01959374		2637.58	-0.00262636		3167.57	0.00672919		3697.57	0.00075403		4227.57	0.03582165
517.8	-0.02412799		1047.79	-0.00906322		1577.79	0.01946082		2107.78	0.01938811		2637.78	-0.00269773		3167.77	0.00693221		3697.77	-0.00001237		4227.77	0.0360492
518	-0.02392151		1047.99	-0.0083348		1577.99	0.01942349		2107.98	0.01959013		2637.98	-0.00279869		3167.97	0.00733756		3697.97	-0.00025712		4227.97	0.03628173
518.2	-0.02408661		1048.19	-0.00863703		1578.19	0.01895026		2108.18	0.01977945		2638.18	-0.0026318		3168.17	0.00821907		3698.17	-0.00099427		4228.17	0.03638165
518.4	-0.02417623		1048.39	-0.00874652		1578.39	0.01808829		2108.38	0.01973657		2638.38	-0.00230041		3168.37	0.00882814		3698.37	-0.00172659		4228.37	0.03683993
518.6	-0.02336911		1048.59	-0.00846738		1578.59	0.01802442		2108.58	0.02054977		2638.58	-0.00233974		3168.57	0.00860354		3698.57	-0.00241819		4228.57	0.03692969
518.8	-0.02290345		1048.79	-0.00881429		1578.79	0.01744322		2108.78	0.02095363		2638.78	-0.00295352		3168.77	0.00911747		3698.77	-0.00347775		4228.77	0.03768394
519	-0.02229804		1048.99	-0.00894322		1578.99	0.01804985		2108.98	0.02098024		2638.98	-0.00307056		3168.97	0.00972059		3698.97	-0.00301066		4228.97	0.03849795
519.2	-0.02239668		1049.19	-0.00853796		1579.19	0.01817862		2109.18	0.0210404		2639.18	-0.00335556		3169.17	0.0095137		3699.17	-0.00254472		4229.17	0.03950723
519.4	-0.02259663		1049.39	-0.0085765		1579.39	0.01845492		2109.38	0.02131204		2639.38	-0.00339489		3169.37	0.00942993		3699.37	-0.00218453		4229.37	0.04030018
519.6	-0.02286608		1049.59	-0.00868146		1579.59	0.01834226		2109.58	0.02120795		2639.58	-0.00332743		3169.57	0.0096618		3699.57	-0.00222733		4229.57	0.0406219
519.8	-0.02273486		1049.79	-0.00910761		1579.79	0.01823654		2109.78	0.02207259		2639.78	-0.00289157		3169.77	0.00949391		3699.77	-0.00255425		4229.77	0.0403077
520	-0.02307289		1049.99	-0.00925137		1579.99	0.01763641		2109.98	0.0225504		2639.98	-0.00260745		3169.97	0.00904424		3699.97	-0.00274854		4229.97	0.0407735
520.2	-0.02354605		1050.19	-0.00922677		1580.19	0.01844074		2110.18	0.02277565		2640.18	-0.00307816		3170.17	0.00818989		3700.17	-0.00277394		4230.17	0.04058322
520.4	-0.02307644		1050.39	-0.00947798		1580.39	0.01852316		2110.38	0.02318744		2640.38	-0.00310427		3170.37	0.00794763		3700.37	-0.0030603		4230.37	0.04019256
520.6	-0.0241868		1050.59	-0.00962662		1580.59	0.01868466		2110.58	0.02342842		2640.58	-0.00408604		3170.57	0.00738443		3700.57	-0.00299261		4230.57	0.03995908
520.8	-0.02406721		1050.79	-0.00954837		1580.79	0.01824231		2110.78	0.02320421		2640.78	-0.0051889		3170.77	0.00717575		3700.77	-0.00241285		4230.77	0.04002813
521	-0.0239987		1050.99	-0.00910892		1580.99	0.01843601		2110.98	0.02228447		2640.98	-0.00482675		3170.97	0.00693588		3700.97	-0.00202521		4230.97	0.0395697
521.2	-0.02439479		1051.19	-0.0081489		1581.19	0.01786553		2111.18	0.02068086		2641.18	-0.00528546		3171.17	0.0061142		3701.17	-0.00244569		4231.17	0.03929731
521.4	-0.02485633		1051.39	-0.0087583		1581.39	0.01813676		2111.38	0.02092582		2641.38	-0.00531689		3171.37	0.00649268		3701.37	-0.00289472		4231.37	0.03958895
521.6	-0.02475166		1051.59	-0.00801895		1581.59	0.01906111		2111.58	0.02038737		2641.58	-0.00525126		3171.57	0.00783729		3701.57	-0.00352453		4231.57	0.03980926
521.8	-0.02579282		1051.79	-0.0076868		1581.79	0.01925698		2111.78	0.01951541		2641.78	-0.00599001		3171.77	0.00724399		3701.77	-0.00401891		4231.77	0.04092258
522	-0.02653224		1051.99	-0.00880983		1581.99	0.01965161		2111.98	0.01980211		2641.98	-0.00698006		3171.97	0.00704189		3701.97	-0.00379652		4231.97	0.04043744
522.2	-0.02704898		1052.19	-0.00901775		1582.19	0.01977591		2112.18	0.01945612		2642.18	-0.00696845		3172.17	0.00728707		3702.17	-0.00432817		4232.17	0.0398847
522.4	-0.0261921		1052.39	-0.00922087		1582.39	0.02009063		2112.38	0.01957175		2642.38	-0.00652739		3172.37	0.00721522		3702.37	-0.0042914		4232.37	0.04011369
522.6	-0.02601269		1052.59	-0.01000497		1582.59	0.02039566		2112.58	0.01958207		2642.58	-0.00697806		3172.57	0.00704862		3702.57	-0.00461612		4232.57	0.0397345
522.8	-0.02628584		1052.79	-0.01057045		1582.79	0.020234		2112.78	0.0193115		2642.78	-0.00729838		3172.77	0.00793023		3702.77	-0.0039165		4232.77	0.03958987
523	-0.02726761		1052.99	-0.01084853		1582.99	0.01971533		2112.98	0.01982312		2642.98	-0.00682118		3172.97	0.00780543		3702.97	-0.00207667		4232.97	0.04021088
523.2	-0.02754752		1053.19	-0.01127948		1583.19	0.01969156		2113.18	0.02034927		2643.18	-0.00673429		3173.17	0.00771103		3703.17	-0.00211285		4233.17	0.03985082
523.4	-0.0277864		1053.39	-0.01171091		1583.39	0.01906206		2113.38	0.02139231		2643.38	-0.00728802		3173.37	0.00858692		3703.37	-0.00184028		4233.37	0.03985049
523.6	-0.02736473		1053.59	-0.0121077		1583.59	0.01878405		2113.58	0.02111795		2643.58	-0.00723106		3173.57	0.00898007		3703.57	-0.00150751		4233.57	0.03999498
523.8	-0.02689654		1053.79	-0.01263373		1583.79	0.01779772		2113.78	0.02099856		2643.78	-0.00622867		3173.77	0.00858342		3703.77	-0.00105607		4233.77	0.0399782
524	-0.02718879		1053.99	-0.01305718		1583.99	0.01724457		2113.98	0.02112436		2643.98	-0.00656636		3173.97	0.00837484		3703.97	-0.00155383		4233.97	0.04045387
524.2	-0.0258672		1054.19	-0.01338233		1584.19	0.01657802		2114.18	0.02086169		2644.18	-0.00664408		3174.17	0.00701751		3704.17	-0.00118954		4234.17	0.03978084
524.4	-0.02505878		1054.39	-0.01263139		1584.39	0.01613983		2114.38	0.02140018		2644.38	-0.00676375		3174.37	0.00693911		3704.37	-0.00072233		4234.37	0.03954835
524.6	-0.02537039		1054.59	-0.01221423		1584.59	0.01595487		2114.58	0.02113381		2644.58	-0.00621578		3174.57	0.00723829		3704.57	-0.00056434		4234.57	0.03943167
524.8	-0.02496532		1054.79	-0.0121221		1584.79	0.01606581		2114.78	0.02076254		2644.78	-0.00588372		3174.77	0.00635995		3704.77	-0.00082598		4234.77	0.03946374
525	-0.02501577		1054.99	-0.01237948		1584.99	0.01613223		2114.98	0.01936339		2644.98	-0.00504923		3174.97	0.00551197		3704.97	-0.00155644		4234.97	0.03908119
525.2	-0.02493479		1055.19	-0.01237745		1585.19	0.01734496		2115.18	0.01810297		2645.18	-0.00486127		3175.17	0.00579965		3705.17	-0.00267189		4235.17	0.04002482
525.4	-0.02450261		1055.39	-0.01359944		1585.39	0.01811609		2115.38	0.01791445		2645.38	-0.00410082		3175.37	0.00603453		3705.37	-0.0038197		4235.37	0.04073029
525.6	-0.0232697		1055.59	-0.0136158		1585.59	0.0190466		2115.58	0.01640381		2645.58	-0.00420547		3175.57	0.00548399		3705.57	-0.00421105		4235.57	0.04081435
525.8	-0.02381631		1055.79	-0.01437877		1585.79	0.01936207		2115.78	0.01655227		2645.78	-0.00427717		3175.77	0.00468062		3705.77	-0.00457528		4235.77	0.04027013
526	-0.02433423		1055.99	-0.01499977		1585.99	0.02051891		2115.98	0.01679208		2645.98	-0.00415593		3175.97	0.00494239		3705.97	-0.00500967		4235.97	0.03961811
526.2	-0.02411448		1056.19	-0.01495228		1586.19	0.02057429		2116.18	0.01589629		2646.18	-0.00429844		3176.17	0.00488993		3706.17	-0.00595488		4236.17	0.03923522
526.4	-0.02434508		1056.39	-0.01479122		1586.39	0.02112055		2116.38	0.01626528		2646.38	-0.0038232		3176.37	0.0049252		3706.37	-0.00601136		4236.37	0.03913529
526.6	-0.02522081		1056.59	-0.01530381		1586.59	0.0213099		2116.58	0.01639982		2646.58	-0.00444761		3176.57	0.00418187		3706.57	-0.00581212		4236.57	0.03927483
526.8	-0.02549159		1056.79	-0.01497033		1586.79	0.02164898		2116.78	0.01701253		2646.78	-0.00488738		3176.77	0.00393982		3706.77	-0.00482896		4236.77	0.03962149
527	-0.02566009		1056.99	-0.01459469		1586.99	0.0215198		2116.98	0.01747581		2646.98	-0.00387338		3176.97	0.00374562		3706.97	-0.00411955		4236.97	0.04004991
527.2	-0.02485448		1057.19	-0.01424947		1587.19	0.0221888		2117.18	0.01805382		2647.18	-0.00438521		3177.17	0.00440444		3707.17	-0.00388884		4237.17	0.03946248
527.4	-0.02556562		1057.39	-0.01338717		1587.39	0.02285941		2117.38	0.0185263		2647.38	-0.00474821		3177.37	0.00517097		3707.37	-0.00392202		4237.37	0.04001797
527.6	-0.02551846		1057.59	-0.01304312		1587.59	0.02318492		2117.58	0.01875436		2647.58	-0.00557385		3177.57	0.005201		3707.57	-0.00287657		4237.57	0.04008198
527.8	-0.02556717		1057.79	-0.01180025		1587.79	0.02204182		2117.78	0.01977132		2647.78	-0.00565924		3177.77	0.00547206		3707.77	-0.00219173		4237.77	0.04015241
528	-0.02564105		1057.99	-0.01176865		1587.99	0.02204854		2117.98	0.02027821		2647.98	-0.00646709		3177.97	0.00496789		3707.97	-0.00159096		4237.97	0.04024679
528.2	-0.0251621		1058.19	-0.01128104		1588.19	0.02202871		2118.18	0.02040429		2648.18	-0.00573053		3178.17	0.00488852		3708.17	-0.00054884		4238.17	0.04020694
528.4	-0.02484556		1058.39	-0.01053977		1588.39	0.02239084		2118.38	0.02133359		2648.38	-0.00544091		3178.37	0.00591905		3708.37	-0.00068662		4238.37	0.03982262
528.6	-0.02453577		1058.59	-0.01096984		1588.59	0.02269855		2118.58	0.02142509		2648.58	-0.00504392		3178.57	0.00608542		3708.57	-0.00019245		4238.57	0.03980518
528.8	-0.0246264		1058.79	-0.01102562		1588.79	0.0227292		2118.78	0.02084359		2648.78	-0.00536958		3178.77	0.00551992		3708.77	-0.00085565		4238.77	0.03938274
529	-0.02438363		1058.99	-0.01136612		1588.99	0.0224742		2118.98	0.02010183		2648.98	-0.00438972		3178.97	0.00612033		3708.97	-0.00126579		4238.97	0.03949785
529.2	-0.0245001		1059.19	-0.01189839		1589.19	0.02278163		2119.18	0.01983299		2649.18	-0.0045809		3179.17	0.00670674		3709.17	-0.00165486		4239.17	0.03984298
529.4	-0.02398094		1059.39	-0.01233546		1589.39	0.02162294		2119.38	0.01994241		2649.38	-0.0053688		3179.37	0.00625628		3709.37	-0.0014462		4239.37	0.03883804
529.6	-0.02468847		1059.59	-0.01268326		1589.59	0.02109577		2119.58	0.01966436		2649.58	-0.00471274		3179.57	0.00643752		3709.57	-0.00163235		4239.57	0.03796715
529.8	-0.02596573		1059.79	-0.01263785		1589.79	0.01961178		2119.78	0.02002817		2649.78	-0.00339596		3179.77	0.00596941		3709.77	-0.0013679		4239.77	0.03758891
530	-0.02691504		1059.99	-0.0128287		1589.99	0.01960766		2119.98	0.01928182		2649.98	-0.0030595		3179.97	0.00582943		3709.97	-0.00184076		4239.97	0.03687849
530.2	-0.02636746		1060.19	-0.01336618		1590.19	0.01896671		2120.18	0.01884677		2650.18	-0.00286273		3180.17	0.00529149		3710.17	-0.00230708		4240.17	0.03667878
530.4	-0.02695772		1060.39	-0.01261642		1590.39	0.01893119		2120.38	0.01904341		2650.38	-0.00195321		3180.37	0.0049274		3710.37	-0.00297024		4240.37	0.03708405
530.6	-0.02760623		1060.59	-0.01245925		1590.59	0.01828688		2120.58	0.01871215		2650.58	-0.00171249		3180.57	0.00408143		3710.57	-0.00303946		4240.57	0.03746662
530.8	-0.02857516		1060.79	-0.01245538		1590.79	0.01856436		2120.78	0.01817186		2650.78	-0.00142108		3180.77	0.00433849		3710.77	-0.00348109		4240.77	0.03721287
531	-0.02830223		1060.99	-0.01222563		1590.99	0.0184768		2120.98	0.01808079		2650.98	0.00004589		3180.97	0.00515366		3710.97	-0.00359661		4240.97	0.03660289
531.2	-0.02846796		1061.19	-0.01175325		1591.19	0.01841811		2121.18	0.01881352		2651.18	-0.00119907		3181.17	0.00508954		3711.17	-0.00367358		4241.17	0.03625189
531.4	-0.02878984		1061.39	-0.01109352		1591.39	0.01916992		2121.38	0.01898553		2651.38	-0.00230101		3181.37	0.00542586		3711.37	-0.00446442		4241.37	0.03695931
531.6	-0.02842426		1061.59	-0.01023682		1591.59	0.01794322		2121.58	0.01915235		2651.58	-0.00386296		3181.57	0.00582607		3711.57	-0.00414203		4241.57	0.03721284
531.8	-0.02824147		1061.79	-0.00998167		1591.79	0.0176152		2121.78	0.01868911		2651.78	-0.00341438		3181.77	0.00655249		3711.77	-0.00444451		4241.77	0.03833565
532	-0.02842509		1061.99	-0.00994977		1591.99	0.0185944		2121.98	0.01809652		2651.98	-0.00358386		3181.97	0.0065874		3711.97	-0.00483627		4241.97	0.03878338
532.2	-0.02773314		1062.19	-0.00979187		1592.19	0.01913447		2122.18	0.01793465		2652.18	-0.00406078		3182.17	0.00639543		3712.17	-0.00534717		4242.17	0.03890019
532.4	-0.02746439		1062.39	-0.00979038		1592.39	0.01853366		2122.38	0.01814329		2652.38	-0.00480511		3182.37	0.00650245		3712.37	-0.00601597		4242.37	0.03880243
532.6	-0.02726643		1062.59	-0.00995928		1592.59	0.01916626		2122.58	0.01873678		2652.58	-0.0062319		3182.57	0.00659497		3712.57	-0.00586876		4242.57	0.03970891
532.8	-0.0267607		1062.79	-0.0106331		1592.79	0.01959916		2122.78	0.01877024		2652.78	-0.00714643		3182.77	0.00757816		3712.77	-0.00610842		4242.77	0.04016199
533	-0.02657397		1062.99	-0.01064462		1592.99	0.02049029		2122.98	0.01890897		2652.98	-0.0071324		3182.97	0.00731476		3712.97	-0.00567349		4242.97	0.04048421
533.2	-0.02649463		1063.19	-0.01165866		1593.19	0.02072207		2123.18	0.01846238		2653.18	-0.00840521		3183.17	0.00694915		3713.17	-0.00545783		4243.17	0.03957497
533.4	-0.02619674		1063.39	-0.01236198		1593.39	0.02107493		2123.38	0.01870917		2653.38	-0.00828398		3183.37	0.00732041		3713.37	-0.00488042		4243.37	0.03864013
533.6	-0.02633718		1063.59	-0.01276257		1593.59	0.02099718		2123.58	0.01856377		2653.58	-0.00755785		3183.57	0.00737371		3713.57	-0.00490178		4243.57	0.03907303
533.8	-0.025919		1063.79	-0.01276911		1593.79	0.02090835		2123.78	0.01954204		2653.78	-0.00672421		3183.77	0.00669486		3713.77	-0.00416641		4243.77	0.0389341
534	-0.02621665		1063.99	-0.01271169		1593.99	0.02140719		2123.98	0.01975921		2653.98	-0.00639844		3183.97	0.00704924		3713.97	-0.00426585		4243.97	0.03849427
534.2	-0.02614031		1064.19	-0.01242721		1594.19	0.02110729		2124.18	0.01967422		2654.18	-0.00542863		3184.17	0.00730517		3714.17	-0.0050582		4244.17	0.0391443
534.4	-0.02700422		1064.39	-0.01209018		1594.39	0.02091086		2124.38	0.01976434		2654.38	-0.00554086		3184.37	0.0069207		3714.37	-0.00481076		4244.37	0.03886726
534.6	-0.02775875		1064.59	-0.01211403		1594.59	0.02055259		2124.58	0.02024322		2654.58	-0.00484407		3184.57	0.00737465		3714.57	-0.00418373		4244.57	0.03792854
534.8	-0.02787804		1064.79	-0.01251102		1594.79	0.02042137		2124.78	0.02100286		2654.78	-0.00419167		3184.77	0.00803152		3714.77	-0.00282071		4244.77	0.03757523
535	-0.02721193		1064.99	-0.01226284		1594.99	0.01977141		2124.98	0.02181421		2654.98	-0.00343936		3184.97	0.00835081		3714.97	-0.00309864		4244.97	0.03743568
535.2	-0.02760362		1065.19	-0.01222891		1595.19	0.0195544		2125.18	0.02234442		2655.18	-0.00349996		3185.17	0.00777368		3715.17	-0.00243515		4245.17	0.03676813
535.4	-0.02725757		1065.39	-0.01214635		1595.39	0.01949906		2125.38	0.02275612		2655.38	-0.00404483		3185.37	0.00788307		3715.37	-0.0029534		4245.37	0.03731986
535.6	-0.02740956		1065.59	-0.01190466		1595.59	0.01866544		2125.58	0.0222981		2655.58	-0.00390907		3185.57	0.0077216		3715.57	-0.00292565		4245.57	0.03715524
535.8	-0.02795902		1065.79	-0.01130806		1595.79	0.01895745		2125.78	0.02220945		2655.78	-0.00315705		3185.77	0.00773655		3715.77	-0.00260742		4245.77	0.03763457
536	-0.02811891		1065.99	-0.00993236		1595.99	0.01880252		2125.98	0.02205776		2655.98	-0.00340387		3185.97	0.00646324		3715.97	-0.00307326		4245.97	0.03734034
536.2	-0.02726603		1066.19	-0.01026278		1596.19	0.01821332		2126.18	0.02146717		2656.18	-0.0037194		3186.17	0.00589578		3716.17	-0.00254192		4246.17	0.03804506
536.4	-0.02761963		1066.39	-0.00998116		1596.39	0.0178533		2126.38	0.02141064		2656.38	-0.00482512		3186.37	0.00600524		3716.37	-0.00293376		4246.37	0.03924667
536.6	-0.02629616		1066.59	-0.01073856		1596.59	0.01808667		2126.58	0.02176521		2656.58	-0.00531806		3186.57	0.00599996		3716.57	-0.0032477		4246.57	0.03968865
536.8	-0.02580703		1066.79	-0.01127249		1596.79	0.01865939		2126.78	0.02072827		2656.78	-0.00586248		3186.77	0.00550554		3716.77	-0.00323104		4246.77	0.03968762
537	-0.02558108		1066.99	-0.0119048		1596.99	0.01946292		2126.98	0.02069163		2656.98	-0.00675172		3186.97	0.00448559		3716.97	-0.00358278		4246.97	0.03944549
537.2	-0.0247982		1067.19	-0.01358657		1597.19	0.01958588		2127.18	0.02036733		2657.18	-0.00715553		3187.17	0.00465772		3717.17	-0.00376717		4247.17	0.0385546
537.4	-0.0247511		1067.39	-0.01493296		1597.39	0.01976662		2127.38	0.02069319		2657.38	-0.00754576		3187.37	0.00510231		3717.37	-0.0037157		4247.37	0.03885984
537.6	-0.02411835		1067.59	-0.01509534		1597.59	0.01971471		2127.58	0.01993472		2657.58	-0.00667959		3187.57	0.00494534		3717.57	-0.00391766		4247.57	0.03968177
537.8	-0.02428486		1067.79	-0.01524708		1597.79	0.01947618		2127.78	0.020099		2657.78	-0.00654698		3187.77	0.00565755		3717.77	-0.00368152		4247.77	0.03995832
538	-0.02464565		1067.99	-0.01531456		1597.99	0.01918538		2127.98	0.01932232		2657.98	-0.00621508		3187.97	0.00606773		3717.97	-0.00433211		4247.97	0.03982604
538.2	-0.0245189		1068.19	-0.01569901		1598.19	0.01834044		2128.18	0.01891779		2658.18	-0.00626869		3188.17	0.00671648		3718.17	-0.00460908		4248.17	0.03995419
538.4	-0.02437467		1068.39	-0.01613409		1598.39	0.01835272		2128.38	0.01904101		2658.38	-0.00647862		3188.37	0.00659767		3718.37	-0.00421926		4248.37	0.03887841
538.6	-0.02465825		1068.59	-0.01583099		1598.59	0.01807723		2128.58	0.01896453		2658.58	-0.0054758		3188.57	0.00779492		3718.57	-0.00406944		4248.57	0.03846869
538.8	-0.02452289		1068.79	-0.01574665		1598.79	0.01801594		2128.78	0.01846471		2658.78	-0.0052602		3188.77	0.00802618		3718.77	-0.00337431		4248.77	0.03807443
539	-0.02433691		1068.99	-0.0153816		1598.99	0.01815911		2128.98	0.01741147		2658.98	-0.00454583		3188.97	0.00818273		3718.97	-0.00378691		4248.97	0.03785436
539.2	-0.02483308		1069.19	-0.01475044		1599.19	0.01919381		2129.18	0.01660817		2659.18	-0.00411047		3189.17	0.00784637		3719.17	-0.00366591		4249.17	0.03725601
539.4	-0.02548747		1069.39	-0.01375071		1599.39	0.01909171		2129.38	0.01622241		2659.38	-0.00440406		3189.37	0.0082623		3719.37	-0.00346305		4249.37	0.03760403
539.6	-0.02579875		1069.59	-0.01241321		1599.59	0.01931852		2129.58	0.01536059		2659.58	-0.00393514		3189.57	0.00782804		3719.57	-0.00313238		4249.57	0.03771654
539.8	-0.02586633		1069.79	-0.01084006		1599.79	0.01929692		2129.78	0.01535177		2659.78	-0.00247724		3189.77	0.00740438		3719.77	-0.00261003		4249.77	0.03848161
540	-0.02602276		1069.99	-0.01048029		1599.99	0.01938921		2129.98	0.01430184		2659.98	-0.002343		3189.97	0.006913		3719.97	-0.0026172		4249.97	0.03848043
540.2	-0.02540516		1070.19	-0.01078572		1600.19	0.01897486		2130.18	0.01443656		2660.18	-0.00320885		3190.17	0.00692946		3720.17	-0.00277462		4250.17	0.03872382
540.4	-0.02593353		1070.39	-0.01013794		1600.39	0.01848758		2130.38	0.01493408		2660.38	-0.00418386		3190.37	0.00644437		3720.37	-0.00278171		4250.37	0.03924004
540.6	-0.02616758		1070.59	-0.01039747		1600.59	0.01827105		2130.58	0.01501102		2660.58	-0.0038816		3190.57	0.00552823		3720.57	-0.00345566		4250.57	0.03885547
540.8	-0.02560652		1070.79	-0.01043661		1600.79	0.01929311		2130.78	0.01519347		2660.78	-0.00413112		3190.77	0.00525492		3720.77	-0.00340942		4250.77	0.03863835
541	-0.02561353		1070.99	-0.01101038		1600.99	0.01898348		2130.98	0.01599162		2660.98	-0.00449141		3190.97	0.00519347		3720.97	-0.00392592		4250.97	0.03866262
541.2	-0.02625196		1071.19	-0.01134619		1601.19	0.01838536		2131.18	0.01576183		2661.18	-0.00439773		3191.17	0.00537048		3721.17	-0.0035712		4251.17	0.03821399
541.4	-0.02711157		1071.39	-0.01147801		1601.39	0.01727673		2131.38	0.01537561		2661.38	-0.00455125		3191.37	0.00570189		3721.37	-0.00357273		4251.37	0.03836796
541.6	-0.02742273		1071.59	-0.01136394		1601.59	0.01635891		2131.58	0.01508		2661.58	-0.00362026		3191.57	0.00618532		3721.57	-0.00288796		4251.57	0.03829198
541.8	-0.02747659		1071.79	-0.01064745		1601.79	0.01542457		2131.78	0.01592046		2661.78	-0.00453515		3191.77	0.00661259		3721.77	-0.00251154		4251.77	0.03878366
542	-0.02782535		1071.99	-0.01111129		1601.99	0.01485462		2131.98	0.01710103		2661.98	-0.00426565		3191.97	0.00593338		3721.97	-0.00437152		4251.97	0.03844504
542.2	-0.02748076		1072.19	-0.01079622		1602.19	0.01460943		2132.18	0.01752547		2662.18	-0.00480319		3192.17	0.00612278		3722.17	-0.00488389		4252.17	0.03912591
542.4	-0.02718831		1072.39	-0.01095291		1602.39	0.01532285		2132.38	0.01741648		2662.38	-0.0050555		3192.37	0.00582256		3722.37	-0.0058414		4252.37	0.03913452
542.6	-0.0281111		1072.59	-0.010243		1602.59	0.01593253		2132.58	0.01751616		2662.58	-0.00486748		3192.57	0.00611758		3722.57	-0.00618502		4252.57	0.03978971
542.8	-0.02794961		1072.79	-0.01007114		1602.79	0.01651999		2132.78	0.01756808		2662.78	-0.00514264		3192.77	0.00591983		3722.77	-0.00596367		4252.77	0.04058086
543	-0.02776655		1072.99	-0.01010297		1602.99	0.01737384		2132.98	0.01804186		2662.98	-0.00480382		3192.97	0.00615464		3722.97	-0.00579171		4252.97	0.04126547
543.2	-0.02808578		1073.19	-0.00989644		1603.19	0.01810194		2133.18	0.01755664		2663.18	-0.00590016		3193.17	0.0064503		3723.17	-0.00567559		4253.17	0.0418888
543.4	-0.02816026		1073.39	-0.01026026		1603.39	0.01810839		2133.38	0.01851628		2663.38	-0.00606666		3193.37	0.00700791		3723.37	-0.00401978		4253.37	0.04151441
543.6	-0.02777901		1073.59	-0.01029925		1603.59	0.01944916		2133.58	0.01913		2663.58	-0.00560123		3193.57	0.00751057		3723.57	-0.00349852		4253.57	0.0422224
543.8	-0.0275029		1073.79	-0.01088545		1603.79	0.01972037		2133.78	0.0197399		2663.78	-0.0060205		3193.77	0.00711579		3723.77	-0.00286509		4253.77	0.0422282
544	-0.02746363		1073.99	-0.01190201		1603.99	0.02069461		2133.98	0.01938997		2663.98	-0.00703965		3193.97	0.00708882		3723.97	-0.00257849		4253.97	0.04202446
544.2	-0.02643925		1074.19	-0.01164545		1604.19	0.02114281		2134.18	0.01971461		2664.18	-0.0077832		3194.17	0.00626683		3724.17	-0.00230743		4254.17	0.04239969
544.4	-0.02606888		1074.39	-0.01244493		1604.39	0.02075291		2134.38	0.01948596		2664.38	-0.00757626		3194.37	0.00640478		3724.37	-0.00148763		4254.37	0.04230082
544.6	-0.02556551		1074.59	-0.01304994		1604.59	0.02096854		2134.58	0.01960245		2664.58	-0.00778127		3194.57	0.00612745		3724.57	-0.00145031		4254.57	0.04096025
544.8	-0.0243796		1074.79	-0.01346963		1604.79	0.02088085		2134.78	0.02022707		2664.78	-0.00789222		3194.77	0.0061685		3724.77	-0.00088462		4254.77	0.04038231
545	-0.02483319		1074.99	-0.01335291		1604.99	0.01995367		2134.98	0.02056034		2664.98	-0.00798033		3194.97	0.00606036		3724.97	-0.00038523		4254.97	0.04051967
545.2	-0.02557532		1075.19	-0.01371493		1605.19	0.01896254		2135.18	0.02033617		2665.18	-0.00727776		3195.17	0.00608133		3725.17	0.00045041		4255.17	0.04004703
545.4	-0.02648883		1075.39	-0.01356164		1605.39	0.01787877		2135.38	0.02105565		2665.38	-0.00629927		3195.37	0.00510636		3725.37	0.00081887		4255.37	0.03907945
545.6	-0.02708881		1075.59	-0.01321263		1605.59	0.01729921		2135.58	0.02137864		2665.58	-0.00574106		3195.57	0.00497996		3725.57	0.00117533		4255.57	0.03925799
545.8	-0.02717003		1075.79	-0.0130659		1605.79	0.01688754		2135.78	0.02246726		2665.78	-0.00585209		3195.77	0.00392101		3725.77	-0.00017148		4255.77	0.03956694
546	-0.02768226		1075.99	-0.01346426		1605.99	0.01662212		2135.98	0.02281192		2665.98	-0.00547198		3195.97	0.0037855		3725.97	-0.00210291		4255.97	0.03888698
546.2	-0.02903184		1076.19	-0.01362504		1606.19	0.01654813		2136.18	0.0225878		2666.18	-0.00519991		3196.17	0.00367531		3726.17	-0.00241321		4256.17	0.03849411
546.4	-0.02920724		1076.39	-0.01391688		1606.39	0.01668943		2136.38	0.02275383		2666.38	-0.00445248		3196.37	0.00356259		3726.37	-0.00292684		4256.37	0.03797756
546.6	-0.03036425		1076.59	-0.01327211		1606.59	0.01666413		2136.58	0.02227167		2666.58	-0.00395475		3196.57	0.0034285		3726.57	-0.00342336		4256.57	0.03780736
546.8	-0.0312501		1076.79	-0.01378686		1606.79	0.01633362		2136.78	0.02208467		2666.78	-0.0045504		3196.77	0.00421966		3726.77	-0.00377124		4256.77	0.03842231
547	-0.03108667		1076.99	-0.01375911		1606.99	0.01616946		2136.98	0.0210094		2666.98	-0.00513576		3196.97	0.00523262		3726.97	-0.00422664		4256.97	0.03765113
547.2	-0.03158287		1077.19	-0.01375212		1607.19	0.01640048		2137.18	0.02003255		2667.18	-0.00609826		3197.17	0.00572236		3727.17	-0.0044637		4257.17	0.03787965
547.4	-0.03089945		1077.39	-0.01314728		1607.39	0.01660611		2137.38	0.01986183		2667.38	-0.00559073		3197.37	0.00682876		3727.37	-0.00489113		4257.37	0.03747316
547.6	-0.03145881		1077.59	-0.01315251		1607.59	0.01721169		2137.58	0.01872185		2667.58	-0.00601748		3197.57	0.00729092		3727.57	-0.00484167		4257.57	0.0385362
547.8	-0.03135064		1077.79	-0.01408406		1607.79	0.01746575		2137.78	0.01758664		2667.78	-0.0068063		3197.77	0.00662232		3727.77	-0.00469983		4257.77	0.03815496
548	-0.03117366		1077.99	-0.01443386		1607.99	0.01778255		2137.98	0.01620066		2667.98	-0.00731936		3197.97	0.00711047		3727.97	-0.00505353		4257.97	0.03812952
548.2	-0.03031921		1078.19	-0.01474031		1608.19	0.01727706		2138.18	0.01577554		2668.18	-0.00840257		3198.17	0.00683631		3728.17	-0.00563903		4258.17	0.03884257
548.4	-0.02916456		1078.39	-0.01546119		1608.39	0.01654756		2138.38	0.01492871		2668.38	-0.00850705		3198.37	0.00728806		3728.37	-0.00546718		4258.37	0.03868794
548.6	-0.02903438		1078.59	-0.0164656		1608.59	0.01779981		2138.58	0.01479228		2668.58	-0.00910692		3198.57	0.00687968		3728.57	-0.00498552		4258.57	0.03928786
548.8	-0.0288682		1078.79	-0.01649964		1608.79	0.01862639		2138.78	0.01508244		2668.78	-0.00865923		3198.77	0.00650414		3728.77	-0.0047712		4258.77	0.0404714
549	-0.02923179		1078.99	-0.01696926		1608.99	0.01873955		2138.98	0.01546804		2668.98	-0.00832379		3198.97	0.00673251		3728.97	-0.00399328		4258.97	0.04101894
549.2	-0.02964718		1079.19	-0.01700207		1609.19	0.01862385		2139.18	0.01587382		2669.18	-0.00788722		3199.17	0.00646209		3729.17	-0.00388722		4259.17	0.04155492
549.4	-0.02951584		1079.39	-0.01618369		1609.39	0.01822964		2139.38	0.01677504		2669.38	-0.00805237		3199.37	0.00621912		3729.37	-0.00417683		4259.37	0.04092971
549.6	-0.02970722		1079.59	-0.01641256		1609.59	0.01761883		2139.58	0.01650932		2669.58	-0.00798377		3199.57	0.00670367		3729.57	-0.00444523		4259.57	0.04168623
549.8	-0.029022		1079.79	-0.01653781		1609.79	0.01780459		2139.78	0.01721268		2669.78	-0.00824809		3199.77	0.00622591		3729.77	-0.00531787		4259.77	0.04108282
550	-0.02988611		1079.99	-0.01675699		1609.99	0.0181117		2139.98	0.01747139		2669.98	-0.00733088		3199.97	0.00599417		3729.97	-0.00617757		4259.97	0.04013154
550.2	-0.03038496		1080.19	-0.01628958		1610.19	0.01854871		2140.18	0.01818276		2670.18	-0.00715476		3200.17	0.00496411		3730.17	-0.00597132		4260.17	0.03990218
550.4	-0.0292655		1080.39	-0.01603827		1610.39	0.0190784		2140.38	0.01834599		2670.38	-0.00636195		3200.37	0.00428701		3730.37	-0.00580337		4260.37	0.03919913
550.6	-0.02959578		1080.59	-0.01553599		1610.59	0.01895124		2140.58	0.01795947		2670.58	-0.00662082		3200.57	0.00427254		3730.57	-0.00605155		4260.57	0.03913173
550.8	-0.03046405		1080.79	-0.0152591		1610.79	0.01858606		2140.78	0.0182427		2670.78	-0.00652852		3200.77	0.00536459		3730.77	-0.00638042		4260.77	0.03896771
551	-0.02993637		1080.99	-0.01475422		1610.99	0.01812055		2140.98	0.01833786		2670.98	-0.00608572		3200.97	0.00546572		3730.97	-0.00679143		4260.97	0.03830519
551.2	-0.03021739		1081.19	-0.01470121		1611.19	0.01813819		2141.18	0.01940579		2671.18	-0.00508754		3201.17	0.00527645		3731.17	-0.00609213		4261.17	0.03782833
551.4	-0.03043752		1081.39	-0.01411586		1611.39	0.01767545		2141.38	0.01924808		2671.38	-0.00415887		3201.37	0.00573924		3731.37	-0.00562094		4261.37	0.03719903
551.6	-0.03157075		1081.59	-0.0146349		1611.59	0.01773338		2141.58	0.01978743		2671.58	-0.0048315		3201.57	0.00609674		3731.57	-0.00457336		4261.57	0.03674612
551.8	-0.03132126		1081.79	-0.01390885		1611.79	0.01741977		2141.78	0.01975318		2671.78	-0.0050686		3201.77	0.00666115		3731.77	-0.00469919		4261.77	0.0361387
552	-0.03155616		1081.99	-0.01311105		1611.99	0.01656963		2141.98	0.01950305		2671.98	-0.00577644		3201.97	0.00693378		3731.97	-0.00507337		4261.97	0.03617806
552.2	-0.03161629		1082.19	-0.01261525		1612.19	0.0160266		2142.18	0.01908267		2672.18	-0.00502859		3202.17	0.00638911		3732.17	-0.00459326		4262.17	0.03642386
552.4	-0.03070806		1082.39	-0.01226958		1612.39	0.01539569		2142.38	0.0185989		2672.38	-0.00509247		3202.37	0.0073565		3732.37	-0.00365148		4262.37	0.0362997
552.6	-0.03137476		1082.59	-0.01297048		1612.59	0.01491588		2142.58	0.01847098		2672.58	-0.00496044		3202.57	0.00785542		3732.57	-0.00299953		4262.57	0.03682549
552.8	-0.03092221		1082.79	-0.01175322		1612.79	0.01433196		2142.78	0.01876926		2672.78	-0.00471415		3202.77	0.00820578		3732.77	-0.00294781		4262.77	0.03686025
553	-0.03179436		1082.99	-0.01201563		1612.99	0.01379456		2142.98	0.01893064		2672.98	-0.00577126		3202.97	0.00882303		3732.97	-0.00266753		4262.97	0.03687662
553.2	-0.03131827		1083.19	-0.01166126		1613.19	0.0135938		2143.18	0.01865587		2673.18	-0.00632056		3203.17	0.01006152		3733.17	-0.00262927		4263.17	0.03724042
553.4	-0.0304317		1083.39	-0.01160924		1613.39	0.01288877		2143.38	0.01785033		2673.38	-0.00681984		3203.37	0.01053203		3733.37	-0.00306649		4263.37	0.03729461
553.6	-0.03001126		1083.59	-0.01314277		1613.59	0.01354991		2143.58	0.01793223		2673.58	-0.00682351		3203.57	0.01029038		3733.57	-0.00323285		4263.57	0.03803313
553.8	-0.02978288		1083.79	-0.01312112		1613.79	0.01471424		2143.78	0.01740534		2673.78	-0.00786574		3203.77	0.00937028		3733.77	-0.00390847		4263.77	0.03833596
554	-0.0305293		1083.99	-0.01451405		1613.99	0.01572017		2143.98	0.01820662		2673.98	-0.00799578		3203.97	0.00855913		3733.97	-0.00522763		4263.97	0.03868864
554.2	-0.02986632		1084.19	-0.01418615		1614.19	0.01687869		2144.18	0.01770751		2674.18	-0.00781372		3204.17	0.00805283		3734.17	-0.00548516		4264.17	0.03995151
554.4	-0.02991747		1084.39	-0.0151693		1614.39	0.01664951		2144.38	0.0178008		2674.38	-0.00786379		3204.37	0.00779034		3734.37	-0.0056575		4264.37	0.03959598
554.6	-0.02986215		1084.59	-0.01519577		1614.59	0.0156234		2144.58	0.01817597		2674.58	-0.00841734		3204.57	0.00753341		3734.57	-0.00620217		4264.57	0.04010481
554.8	-0.03041842		1084.79	-0.01518555		1614.79	0.0157442		2144.78	0.01790281		2674.78	-0.00812857		3204.77	0.00760972		3734.77	-0.00645439		4264.77	0.03909399
555	-0.03004924		1084.99	-0.01574382		1614.99	0.01588283		2144.98	0.01812493		2674.98	-0.00736991		3204.97	0.00656663		3734.97	-0.00669721		4264.97	0.03818183
555.2	-0.03040864		1085.19	-0.01595342		1615.19	0.01621431		2145.18	0.01926362		2675.18	-0.00715604		3205.17	0.00575405		3735.17	-0.00598047		4265.17	0.0381227
555.4	-0.03113405		1085.39	-0.01553864		1615.39	0.01706737		2145.38	0.01879201		2675.38	-0.00767082		3205.37	0.00579429		3735.37	-0.00625665		4265.37	0.03760552
555.6	-0.03075217		1085.59	-0.01434216		1615.59	0.0170864		2145.58	0.01894656		2675.58	-0.00823195		3205.57	0.00588888		3735.57	-0.00675899		4265.57	0.03669977
555.8	-0.03108174		1085.79	-0.01347036		1615.79	0.01710719		2145.78	0.01861329		2675.78	-0.00774309		3205.77	0.0052764		3735.77	-0.00717424		4265.77	0.03620551
556	-0.03061446		1085.99	-0.01235822		1615.99	0.01740536		2145.98	0.0171892		2675.98	-0.00780837		3205.97	0.00507253		3735.97	-0.00638851		4265.97	0.03563151
556.2	-0.03111595		1086.19	-0.01249771		1616.19	0.01697021		2146.18	0.0168084		2676.18	-0.0070491		3206.17	0.00457029		3736.17	-0.00574608		4266.17	0.03533382
556.4	-0.02996187		1086.39	-0.01333373		1616.39	0.01607972		2146.38	0.01564692		2676.38	-0.0071434		3206.37	0.00524473		3736.37	-0.00532702		4266.37	0.0353758
556.6	-0.03057975		1086.59	-0.0132535		1616.59	0.01573756		2146.58	0.01463635		2676.58	-0.00699852		3206.57	0.00486883		3736.57	-0.00496667		4266.57	0.03572215
556.8	-0.03045135		1086.79	-0.0130561		1616.79	0.0158209		2146.78	0.01463836		2676.78	-0.00777889		3206.77	0.00508233		3736.77	-0.00480014		4266.77	0.03557509
557	-0.03115984		1086.99	-0.01355062		1616.99	0.01669465		2146.98	0.0141067		2676.98	-0.00790171		3206.97	0.00523045		3736.97	-0.00449654		4266.97	0.03471914
557.2	-0.03023866		1087.19	-0.01347067		1617.19	0.01689314		2147.18	0.01371777		2677.18	-0.00801579		3207.17	0.00598827		3737.17	-0.00394144		4267.17	0.03475964
557.4	-0.03006854		1087.39	-0.01384736		1617.39	0.0170882		2147.38	0.01364169		2677.38	-0.00772183		3207.37	0.00616162		3737.37	-0.00393102		4267.37	0.03525191
557.6	-0.03067241		1087.59	-0.01479199		1617.59	0.01818442		2147.58	0.014956		2677.58	-0.00818923		3207.57	0.00581866		3737.57	-0.00416697		4267.57	0.03470971
557.8	-0.03134292		1087.79	-0.01482982		1617.79	0.01873055		2147.78	0.0150722		2677.78	-0.00852509		3207.77	0.00620716		3737.77	-0.00413625		4267.77	0.03488758
558	-0.03108506		1087.99	-0.01557039		1617.99	0.01911315		2147.98	0.01620775		2677.98	-0.00810207		3207.97	0.00660912		3737.97	-0.00464901		4267.97	0.03514404
558.2	-0.03113251		1088.19	-0.01511791		1618.19	0.01920251		2148.18	0.01632385		2678.18	-0.00779851		3208.17	0.00656335		3738.17	-0.00467683		4268.17	0.03567546
558.4	-0.03133769		1088.39	-0.01549868		1618.39	0.01860565		2148.38	0.01722239		2678.38	-0.00850025		3208.37	0.00652679		3738.37	-0.00468551		4268.37	0.03514772
558.6	-0.0310396		1088.59	-0.0155172		1618.59	0.01863182		2148.58	0.01764047		2678.58	-0.00837242		3208.57	0.00584517		3738.57	-0.00495081		4268.57	0.0349561
558.8	-0.03156548		1088.79	-0.01571926		1618.79	0.01928824		2148.78	0.01797468		2678.78	-0.00824377		3208.77	0.00552015		3738.77	-0.00519026		4268.77	0.03432262
559	-0.03170741		1088.99	-0.01617581		1618.99	0.01938951		2148.98	0.01903293		2678.98	-0.00829453		3208.97	0.00460834		3738.97	-0.00589072		4268.97	0.03459096
559.2	-0.03225481		1089.19	-0.01624927		1619.19	0.01945797		2149.18	0.02023075		2679.18	-0.00887881		3209.17	0.00387179		3739.17	-0.00608164		4269.17	0.03506161
559.4	-0.0324776		1089.39	-0.01592627		1619.39	0.01989169		2149.38	0.02028155		2679.38	-0.0089902		3209.37	0.00341465		3739.37	-0.00675682		4269.37	0.03431785
559.6	-0.03212332		1089.59	-0.01552562		1619.59	0.01982156		2149.58	0.02071004		2679.58	-0.0090775		3209.57	0.0024075		3739.57	-0.00741952		4269.57	0.03414566
559.8	-0.03215258		1089.79	-0.01605611		1619.79	0.02025899		2149.78	0.02077619		2679.78	-0.00944567		3209.77	0.00159317		3739.77	-0.00752643		4269.77	0.03452909
