# Supplementary material for: Functional development of a V3/glycan-specific broadly neutralizing antibody isolated from a case of HIV superinfection
Source: eLife journal article supplement (doi:10.7554/elife.68110), 2021-07-15
Supplement: fig4-data2 [file E3.xls]

Vers 3.43 Data Simulation
Conc1	3.125E-08	3.125E-08	3.125E-08	3.125E-08	3.125E-08	3.125E-08	3.125E-08	3.125E-08
Start1	200	729.99	1259.99	1789.99	2319.98	2849.98	3379.97	3909.97
Stop1	559.8	1089.79	1619.79	2149.78	2679.78	3209.77	3739.77	4269.77
Time1	Data1	Sim1	Time2	Data2	Sim2	Time3	Data3	Sim3	Time4	Data4	Sim4	Time5	Data5	Sim5	Time6	Data6	Sim6	Time7	Data7	Sim7	Time8	Data8	Sim8
200	0.00043118		729.99	0.00564635		1259.99	0.01172896		1789.99	0.0047842		2319.98	-0.00169427		2849.98	-0.00385236		3379.97	0.0070812		3909.97	0.00527687
200.2	-0.00020256		730.19	0.00489732		1260.19	0.01081266		1790.19	0.00498783		2320.18	-0.00226275		2850.18	-0.00505178		3380.17	0.00857516		3910.17	0.00422216
200.4	-0.00188601		730.39	0.0054906		1260.39	0.00998436		1790.39	0.00523694		2320.38	-0.00228558		2850.38	-0.0056404		3380.37	0.0097762		3910.37	0.00344786
200.6	-0.00322384		730.59	0.00545808		1260.59	0.00954047		1790.59	0.00523846		2320.58	-0.00215021		2850.58	-0.0057809		3380.57	0.01043776		3910.57	0.00274622
200.8	-0.00372224		730.79	0.00594387		1260.79	0.00894919		1790.79	0.00546476		2320.78	-0.00194693		2850.78	-0.00669152		3380.77	0.01204386		3910.77	0.00169697
201	-0.0045427		730.99	0.00575762		1260.99	0.00886042		1790.99	0.00540458		2320.98	-0.00189714		2850.98	-0.00672717		3380.97	0.01317157		3910.97	0.00101487
201.2	-0.00524192		731.19	0.00513375		1261.19	0.00841938		1791.19	0.005754		2321.18	-0.00133734		2851.18	-0.00671639		3381.17	0.01371618		3911.17	0.00003987
201.4	-0.00614988		731.39	0.00487228		1261.39	0.00803829		1791.39	0.00624495		2321.38	-0.00168953		2851.38	-0.00738597		3381.37	0.01454579		3911.37	-0.00089425
201.6	-0.0063939		731.59	0.0039313		1261.59	0.00884799		1791.59	0.00641125		2321.58	-0.00137378		2851.58	-0.00808432		3381.57	0.01452379		3911.57	-0.00187071
201.8	-0.00623959		731.79	0.00354429		1261.79	0.00891189		1791.79	0.00588608		2321.78	-0.0015632		2851.78	-0.00805493		3381.77	0.01506874		3911.77	-0.00236963
202	-0.00673899		731.99	0.00308567		1261.99	0.0093888		1791.99	0.00559297		2321.98	-0.00154158		2851.98	-0.00788722		3381.97	0.01447852		3911.97	-0.0022625
202.2	-0.0069074		732.19	0.00245603		1262.19	0.01071622		1792.19	0.00553228		2322.18	-0.00102227		2852.18	-0.00744034		3382.17	0.01328473		3912.17	-0.00196701
202.4	-0.0066887		732.39	0.00217856		1262.39	0.01028949		1792.39	0.00540282		2322.38	-0.00095362		2852.38	-0.00633181		3382.37	0.01266695		3912.37	-0.00212548
202.6	-0.00596492		732.59	0.00256779		1262.59	0.01049606		1792.59	0.00590379		2322.58	-0.00062046		2852.58	-0.00582449		3382.57	0.0119355		3912.57	-0.0024925
202.8	-0.00676865		732.79	0.00200506		1262.79	0.01054397		1792.79	0.00595058		2322.78	0.00004478		2852.78	-0.00600219		3382.77	0.01100632		3912.77	-0.00277987
203	-0.00587053		732.99	0.00177546		1262.99	0.01048222		1792.99	0.00463355		2322.98	0.00118019		2852.98	-0.00509278		3382.97	0.01067044		3912.97	-0.00255245
203.2	-0.00591091		733.19	0.00067858		1263.19	0.00990589		1793.19	0.00517158		2323.18	0.00085602		2853.18	-0.00505636		3383.17	0.0106495		3913.17	-0.00243953
203.4	-0.00611493		733.39	0.00044526		1263.39	0.00917641		1793.39	0.00473552		2323.38	0.00154252		2853.38	-0.0061847		3383.37	0.01044627		3913.37	-0.00252011
203.6	-0.00603826		733.59	0.00044246		1263.59	0.00882466		1793.59	0.0040846		2323.58	0.0015453		2853.58	-0.00771642		3383.57	0.00978526		3913.57	-0.00189586
203.8	-0.00672969		733.79	0.00030153		1263.79	0.00771148		1793.79	0.0043457		2323.78	0.00091992		2853.78	-0.00877005		3383.77	0.01022795		3913.77	-0.00116544
204	-0.00743498		733.99	0.00042211		1263.99	0.0076447		1793.99	0.00503198		2323.98	0.00140934		2853.98	-0.00962678		3383.97	0.01029644		3913.97	-0.00106297
204.2	-0.00738676		734.19	0.00005645		1264.19	0.00761332		1794.19	0.00512673		2324.18	0.00111796		2854.18	-0.0101683		3384.17	0.01030278		3914.17	-0.00039106
204.4	-0.00834171		734.39	0.00099698		1264.39	0.00797296		1794.39	0.00535488		2324.38	0.00159801		2854.38	-0.00940988		3384.37	0.0099944		3914.37	0.0004866
204.6	-0.00822407		734.59	0.00157475		1264.59	0.0085894		1794.59	0.00487713		2324.58	0.00208326		2854.58	-0.00979084		3384.57	0.01005579		3914.57	0.00004616
204.8	-0.00770927		734.79	0.00198819		1264.79	0.00823562		1794.79	0.00433595		2324.78	0.00235881		2854.78	-0.01013074		3384.77	0.01028324		3914.77	0.00030103
205	-0.0083329		734.99	0.00119748		1264.99	0.00765701		1794.99	0.00480605		2324.98	0.00133354		2854.98	-0.01015938		3384.97	0.00966737		3914.97	0.00035775
205.2	-0.00860288		735.19	0.00149464		1265.19	0.00684852		1795.19	0.00365493		2325.18	0.00071703		2855.18	-0.01054318		3385.17	0.00962139		3915.17	0.00009668
205.4	-0.00919134		735.39	0.00190713		1265.39	0.00690897		1795.39	0.00346242		2325.38	-0.00000554		2855.38	-0.01086151		3385.37	0.01034207		3915.37	-0.00074269
205.6	-0.00862847		735.59	0.00184217		1265.59	0.00771659		1795.59	0.00267646		2325.58	0.00048049		2855.58	-0.0107659		3385.57	0.00944863		3915.57	-0.00113171
205.8	-0.00836511		735.79	0.00221107		1265.79	0.00726672		1795.79	0.00202577		2325.78	0.00054681		2855.78	-0.01071671		3385.77	0.01026835		3915.77	-0.00138611
206	-0.00901374		735.99	0.00198329		1265.99	0.00751504		1795.99	0.00205644		2325.98	0.00093847		2855.98	-0.0108181		3385.97	0.00919763		3915.97	-0.00142187
206.2	-0.00824993		736.19	0.00238509		1266.19	0.00802622		1796.19	0.00272409		2326.18	0.00045195		2856.18	-0.00980475		3386.17	0.0091114		3916.17	-0.00198385
206.4	-0.00778303		736.39	0.00307637		1266.39	0.008917		1796.39	0.00307531		2326.38	-0.00018221		2856.38	-0.00931245		3386.37	0.00866906		3916.37	-0.00259103
206.6	-0.00671337		736.59	0.00268549		1266.59	0.00906128		1796.59	0.00297676		2326.58	-0.00061528		2856.58	-0.00865022		3386.57	0.00814343		3916.57	-0.00237882
206.8	-0.00714207		736.79	0.00142202		1266.79	0.00915737		1796.79	0.00344609		2326.78	-0.00107838		2856.78	-0.00847389		3386.77	0.00861356		3916.77	-0.00230158
207	-0.00643074		736.99	0.000659		1266.99	0.00890532		1796.99	0.00311373		2326.98	-0.00175542		2856.98	-0.00764077		3386.97	0.00911545		3916.97	-0.00255943
207.2	-0.00660791		737.19	0.00077515		1267.19	0.00890291		1797.19	0.0030703		2327.18	-0.00214668		2857.18	-0.00806378		3387.17	0.00915611		3917.17	-0.00224027
207.4	-0.00630853		737.39	0.00082401		1267.39	0.0097192		1797.39	0.00321764		2327.38	-0.00241033		2857.38	-0.0088799		3387.37	0.00919466		3917.37	-0.00234062
207.6	-0.00549539		737.59	0.00046556		1267.59	0.01021216		1797.59	0.00375018		2327.58	-0.00342143		2857.58	-0.00940813		3387.57	0.00893265		3917.57	-0.00138507
207.8	-0.00560338		737.79	-0.00033342		1267.79	0.01024178		1797.79	0.00442783		2327.78	-0.00300899		2857.78	-0.0091021		3387.77	0.00910005		3917.77	-0.00196495
208	-0.00537975		737.99	-0.00019106		1267.99	0.01044985		1797.99	0.00549158		2327.98	-0.00303233		2857.98	-0.0084488		3387.97	0.00899366		3917.97	-0.00153129
208.2	-0.00532928		738.19	0.00011187		1268.19	0.01140412		1798.19	0.00538513		2328.18	-0.00341061		2858.18	-0.00816692		3388.17	0.00831321		3918.17	-0.00165705
208.4	-0.00553744		738.39	0.00009266		1268.39	0.01160323		1798.39	0.00574373		2328.38	-0.00300423		2858.38	-0.00796649		3388.37	0.00780394		3918.37	-0.00203867
208.6	-0.00499555		738.59	0.00046274		1268.59	0.01121119		1798.59	0.00539764		2328.58	-0.00307159		2858.58	-0.0076875		3388.57	0.00764362		3918.57	-0.00288057
208.8	-0.00490474		738.79	-0.00034189		1268.79	0.01004445		1798.79	0.00496835		2328.78	-0.00337318		2858.78	-0.00734818		3388.77	0.00685377		3918.77	-0.00262514
209	-0.00595728		738.99	-0.00098188		1268.99	0.00912843		1798.99	0.00479243		2328.98	-0.00345715		2858.98	-0.0073299		3388.97	0.00660762		3918.97	-0.00344171
209.2	-0.00613892		739.19	-0.00035642		1269.19	0.00838571		1799.19	0.00423417		2329.18	-0.00306777		2859.18	-0.00688042		3389.17	0.0067374		3919.17	-0.00328212
209.4	-0.00739963		739.39	-0.00096082		1269.39	0.00809495		1799.39	0.00559979		2329.38	-0.00195584		2859.38	-0.00662559		3389.37	0.00622799		3919.37	-0.0044743
209.6	-0.00744384		739.59	-0.0010388		1269.59	0.00794071		1799.59	0.00576327		2329.58	-0.00045515		2859.58	-0.00716403		3389.57	0.00598756		3919.57	-0.00499866
209.8	-0.00820185		739.79	-0.00097366		1269.79	0.00733755		1799.79	0.00621047		2329.78	-0.0004622		2859.78	-0.0083343		3389.77	0.00653074		3919.77	-0.00486694
210	-0.00837985		739.99	-0.00146697		1269.99	0.00745685		1799.99	0.00614407		2329.98	-0.00077478		2859.98	-0.00818102		3389.97	0.00610419		3919.97	-0.00405501
210.2	-0.0080702		740.19	-0.00096697		1270.19	0.00774625		1800.19	0.00661017		2330.18	-0.00068024		2860.18	-0.00788405		3390.17	0.00646638		3920.17	-0.00354291
210.4	-0.00881061		740.39	-0.00021707		1270.39	0.00844159		1800.39	0.00635521		2330.38	-0.0001009		2860.38	-0.00837745		3390.37	0.00586653		3920.37	-0.00345575
210.6	-0.00814123		740.59	-0.00001282		1270.59	0.00796061		1800.59	0.00571383		2330.58	0.00035031		2860.58	-0.00817905		3390.57	0.00579071		3920.57	-0.00322744
210.8	-0.00928965		740.79	0.0004883		1270.79	0.00787054		1800.79	0.00576228		2330.78	-0.00078291		2860.78	-0.00857301		3390.77	0.00656247		3920.77	-0.00261004
211	-0.00936546		740.99	0.00170131		1270.99	0.00815763		1800.99	0.0044491		2330.98	-0.0008788		2860.98	-0.00865388		3390.97	0.00583052		3920.97	-0.00191244
211.2	-0.00968344		741.19	0.00258047		1271.19	0.00804886		1801.19	0.0038342		2331.18	-0.00101701		2861.18	-0.00952311		3391.17	0.00591133		3921.17	-0.00109881
211.4	-0.00951517		741.39	0.00229271		1271.39	0.00904111		1801.39	0.00441249		2331.38	-0.00140772		2861.38	-0.00965356		3391.37	0.00544062		3921.37	-0.00117888
211.6	-0.00963033		741.59	0.0025209		1271.59	0.00950338		1801.59	0.00434772		2331.58	-0.00206377		2861.58	-0.01016237		3391.57	0.00489961		3921.57	-0.00028076
211.8	-0.00914627		741.79	0.00229282		1271.79	0.01017216		1801.79	0.00395458		2331.78	-0.00138525		2861.78	-0.01029258		3391.77	0.00527417		3921.77	-0.0004511
212	-0.00866924		741.99	0.00375908		1271.99	0.01064797		1801.99	0.00334519		2331.98	-0.00250698		2861.98	-0.01002053		3391.97	0.00505002		3921.97	0.00021122
212.2	-0.00853104		742.19	0.00430829		1272.19	0.01118626		1802.19	0.00277504		2332.18	-0.00218673		2862.18	-0.00956835		3392.17	0.00535269		3922.17	0.00016757
212.4	-0.00800548		742.39	0.00407808		1272.39	0.01034545		1802.39	0.00319897		2332.38	-0.00180914		2862.38	-0.00967641		3392.37	0.00512544		3922.37	0.00038366
212.6	-0.00708585		742.59	0.00368069		1272.59	0.01041322		1802.59	0.00295996		2332.58	-0.00218579		2862.58	-0.009132		3392.57	0.00512503		3922.57	0.00014378
212.8	-0.00768585		742.79	0.00328261		1272.79	0.01119474		1802.79	0.0026011		2332.78	-0.00182928		2862.78	-0.00888053		3392.77	0.00482636		3922.77	0.00030422
213	-0.00804898		742.99	0.00334818		1272.99	0.01172316		1802.99	0.0033054		2332.98	-0.00135933		2862.98	-0.00816625		3392.97	0.00462571		3922.97	-0.00006316
213.2	-0.00740648		743.19	0.00254468		1273.19	0.01173793		1803.19	0.00438585		2333.18	-0.00192041		2863.18	-0.00783041		3393.17	0.00500947		3923.17	-0.00019686
213.4	-0.00728848		743.39	0.00154265		1273.39	0.01171301		1803.39	0.00414563		2333.38	-0.00150039		2863.38	-0.00728732		3393.37	0.00472833		3923.37	-0.00108949
213.6	-0.00691724		743.59	0.00167003		1273.59	0.01184899		1803.59	0.00436821		2333.58	-0.00078992		2863.58	-0.00687012		3393.57	0.0063996		3923.57	-0.00175563
213.8	-0.00719801		743.79	0.00105525		1273.79	0.01223658		1803.79	0.00364393		2333.78	-0.00174695		2863.78	-0.00689216		3393.77	0.0069354		3923.77	-0.00198968
214	-0.00663716		743.99	-0.00025272		1273.99	0.01284118		1803.99	0.00338781		2333.98	-0.00098994		2863.98	-0.0064024		3393.97	0.00716442		3923.97	-0.00231388
214.2	-0.00638431		744.19	-0.00026411		1274.19	0.0122672		1804.19	0.00368495		2334.18	-0.00027456		2864.18	-0.00645915		3394.17	0.00741924		3924.17	-0.00300272
214.4	-0.00653523		744.39	-0.00025415		1274.39	0.01138081		1804.39	0.00392709		2334.38	-0.00093654		2864.38	-0.00607316		3394.37	0.00792891		3924.37	-0.00342272
214.6	-0.00651233		744.59	0.00011226		1274.59	0.01142009		1804.59	0.00469374		2334.58	-0.00108547		2864.58	-0.00554838		3394.57	0.00871765		3924.57	-0.00333233
214.8	-0.00692485		744.79	-0.00000064		1274.79	0.01054316		1804.79	0.0044197		2334.78	-0.00156406		2864.78	-0.00598421		3394.77	0.00950457		3924.77	-0.00326675
215	-0.00687781		744.99	-0.00006588		1274.99	0.01004638		1804.99	0.00446835		2334.98	-0.00094549		2864.98	-0.00603148		3394.97	0.00876199		3924.97	-0.00304377
215.2	-0.00613712		745.19	0.00000883		1275.19	0.00924353		1805.19	0.00549656		2335.18	-0.00078041		2865.18	-0.00665889		3395.17	0.00873747		3925.17	-0.00365636
215.4	-0.00559868		745.39	-0.00016425		1275.39	0.00967544		1805.39	0.0055931		2335.38	-0.00015988		2865.38	-0.00677287		3395.37	0.00906842		3925.37	-0.00438419
215.6	-0.00525057		745.59	0.00013452		1275.59	0.0090482		1805.59	0.00578643		2335.58	0.00049437		2865.58	-0.00710565		3395.57	0.00938493		3925.57	-0.00464195
215.8	-0.00438171		745.79	0.00053352		1275.79	0.00875415		1805.79	0.00575551		2335.78	0.00197498		2865.78	-0.00736826		3395.77	0.01008637		3925.77	-0.00484282
216	-0.00477662		745.99	0.00117364		1275.99	0.00852465		1805.99	0.00544831		2335.98	0.00267759		2865.98	-0.00770196		3395.97	0.00979831		3925.97	-0.0043014
216.2	-0.005216		746.19	0.00174078		1276.19	0.0082473		1806.19	0.00653144		2336.18	0.00333276		2866.18	-0.00818497		3396.17	0.00910933		3926.17	-0.00346778
216.4	-0.00584384		746.39	0.00220546		1276.39	0.00790289		1806.39	0.00791294		2336.38	0.00363333		2866.38	-0.0083741		3396.37	0.00819409		3926.37	-0.00296259
216.6	-0.00613023		746.59	0.00251952		1276.59	0.00845958		1806.59	0.00812201		2336.58	0.00354089		2866.58	-0.00840466		3396.57	0.00803243		3926.57	-0.00289811
216.8	-0.00661039		746.79	0.0028811		1276.79	0.00974271		1806.79	0.00869592		2336.78	0.00393226		2866.78	-0.00798164		3396.77	0.00763438		3926.77	-0.0022448
217	-0.00594391		746.99	0.00284827		1276.99	0.01021173		1806.99	0.00965487		2336.98	0.00396016		2866.98	-0.00765954		3396.97	0.00682803		3926.97	-0.00189605
217.2	-0.00552758		747.19	0.00241423		1277.19	0.01032225		1807.19	0.00960032		2337.18	0.00343373		2867.18	-0.00769796		3397.17	0.00644526		3927.17	-0.00206971
217.4	-0.00492503		747.39	0.00278967		1277.39	0.01061422		1807.39	0.00927542		2337.38	0.0038346		2867.38	-0.00701168		3397.37	0.00589254		3927.37	-0.00141882
217.6	-0.00528996		747.59	0.0027654		1277.59	0.01140754		1807.59	0.0089833		2337.58	0.00363997		2867.58	-0.00643038		3397.57	0.00676423		3927.57	-0.00157521
217.8	-0.0057021		747.79	0.00265133		1277.79	0.01222855		1807.79	0.0088206		2337.78	0.00257817		2867.78	-0.00630604		3397.77	0.00596282		3927.77	-0.00084264
218	-0.00515815		747.99	0.00194969		1277.99	0.01275919		1807.99	0.00971644		2337.98	0.0024194		2867.98	-0.0056067		3397.97	0.00589335		3927.97	-0.0000651
218.2	-0.00497967		748.19	0.00216854		1278.19	0.01274297		1808.19	0.00934295		2338.18	0.00124123		2868.18	-0.00460419		3398.17	0.00612997		3928.17	0.00068466
218.4	-0.00548662		748.39	0.00165673		1278.39	0.01259352		1808.39	0.00978742		2338.38	0.0005414		2868.38	-0.00376364		3398.37	0.00632262		3928.37	0.00215388
218.6	-0.005599		748.59	0.00121742		1278.59	0.01295456		1808.59	0.00939165		2338.58	0.00054262		2868.58	-0.00359542		3398.57	0.00552562		3928.57	0.00203385
218.8	-0.00522054		748.79	0.00061646		1278.79	0.01231141		1808.79	0.00878047		2338.78	0.00058262		2868.78	-0.00389403		3398.77	0.00529496		3928.77	0.00235953
219	-0.0040762		748.99	0.00091028		1278.99	0.01224629		1808.99	0.00872987		2338.98	0.00079346		2868.98	-0.00378696		3398.97	0.00500481		3928.97	0.00229304
219.2	-0.00334278		749.19	0.00161489		1279.19	0.01189218		1809.19	0.00837122		2339.18	0.00076666		2869.18	-0.00407977		3399.17	0.005223		3929.17	0.00091585
219.4	-0.0034887		749.39	0.00157829		1279.39	0.01203989		1809.39	0.00735326		2339.38	0.00117279		2869.38	-0.00435629		3399.37	0.00578668		3929.37	0.00054529
219.6	-0.00342083		749.59	0.00171081		1279.59	0.01174736		1809.59	0.00768635		2339.58	0.00162962		2869.58	-0.00547699		3399.57	0.00557651		3929.57	0.00010671
219.8	-0.00428432		749.79	0.00233212		1279.79	0.01192477		1809.79	0.00764787		2339.78	0.00178598		2869.78	-0.00594906		3399.77	0.00566117		3929.77	-0.00038604
220	-0.00484655		749.99	0.0032967		1279.99	0.01205323		1809.99	0.00856252		2339.98	0.00198952		2869.98	-0.00723061		3399.97	0.00500758		3929.97	-0.00060164
220.2	-0.00603399		750.19	0.00436774		1280.19	0.01183324		1810.19	0.00894166		2340.18	0.00217476		2870.18	-0.0077142		3400.17	0.00498182		3930.17	-0.00088191
220.4	-0.00679723		750.39	0.00506403		1280.39	0.01209745		1810.39	0.00936107		2340.38	0.0024917		2870.38	-0.00780868		3400.37	0.00594953		3930.37	-0.00084484
220.6	-0.00671207		750.59	0.00512381		1280.59	0.01242699		1810.59	0.00899973		2340.58	0.00300433		2870.58	-0.00841465		3400.57	0.00702169		3930.57	-0.00200979
220.8	-0.00664019		750.79	0.00485831		1280.79	0.01308488		1810.79	0.00881001		2340.78	0.00290225		2870.78	-0.00840683		3400.77	0.00773009		3930.77	-0.00217806
221	-0.00660363		750.99	0.00497695		1280.99	0.01324737		1810.99	0.00854308		2340.98	0.00311879		2870.98	-0.00790965		3400.97	0.00798761		3930.97	-0.00303721
221.2	-0.00716867		751.19	0.00571008		1281.19	0.01326821		1811.19	0.00783362		2341.18	0.00353956		2871.18	-0.00824137		3401.17	0.00846626		3931.17	-0.00408191
221.4	-0.00681402		751.39	0.00596887		1281.39	0.01282951		1811.39	0.00726673		2341.38	0.00338781		2871.38	-0.00693534		3401.37	0.00923736		3931.37	-0.00439141
221.6	-0.00787799		751.59	0.00594257		1281.59	0.01364888		1811.59	0.00752657		2341.58	0.00302555		2871.58	-0.00633929		3401.57	0.00928416		3931.57	-0.00423757
221.8	-0.00856219		751.79	0.00567398		1281.79	0.01412157		1811.79	0.00755424		2341.78	0.00296554		2871.78	-0.0057769		3401.77	0.00942887		3931.77	-0.00359702
222	-0.00872558		751.99	0.00501363		1281.99	0.01393028		1811.99	0.0067403		2341.98	0.00262945		2871.98	-0.00504141		3401.97	0.01002386		3931.97	-0.00284428
222.2	-0.00960957		752.19	0.00481094		1282.19	0.0140941		1812.19	0.00618632		2342.18	0.001748		2872.18	-0.0044747		3402.17	0.01012811		3932.17	-0.00131968
222.4	-0.00950277		752.39	0.00417621		1282.39	0.01358008		1812.39	0.00580257		2342.38	0.00193657		2872.38	-0.00423645		3402.37	0.01043982		3932.37	-0.00000348
222.6	-0.00938103		752.59	0.00354123		1282.59	0.01323623		1812.59	0.00564584		2342.58	0.00204733		2872.58	-0.00417009		3402.57	0.01081117		3932.57	0.00017657
222.8	-0.00881271		752.79	0.00361878		1282.79	0.01341498		1812.79	0.00650663		2342.78	0.00219028		2872.78	-0.00396262		3402.77	0.01155636		3932.77	0.00111621
223	-0.00832821		752.99	0.0036595		1282.99	0.01414388		1812.99	0.00581122		2342.98	0.00177177		2872.98	-0.00439335		3402.97	0.01160381		3932.97	0.00091716
223.2	-0.00843933		753.19	0.00377243		1283.19	0.0145747		1813.19	0.00629008		2343.18	0.00198502		2873.18	-0.0044143		3403.17	0.01133168		3933.17	0.00134061
223.4	-0.0080854		753.39	0.00323342		1283.39	0.01507799		1813.39	0.00649235		2343.38	0.00164368		2873.38	-0.00494639		3403.37	0.01109973		3933.37	0.00146651
223.6	-0.00750213		753.59	0.00294455		1283.59	0.0153495		1813.59	0.00703142		2343.58	0.00197706		2873.58	-0.00530803		3403.57	0.01030274		3933.57	0.00088404
223.8	-0.00859418		753.79	0.00309211		1283.79	0.01509033		1813.79	0.00806158		2343.78	0.00200364		2873.78	-0.00588761		3403.77	0.01005787		3933.77	0.00054149
224	-0.00843992		753.99	0.00371936		1283.99	0.01513301		1813.99	0.00834189		2343.98	0.00255444		2873.98	-0.00651649		3403.97	0.00944688		3933.97	0.00079444
224.2	-0.00868483		754.19	0.00294903		1284.19	0.01478255		1814.19	0.00800873		2344.18	0.00327442		2874.18	-0.00683107		3404.17	0.00967656		3934.17	0.00017664
224.4	-0.00800581		754.39	0.00284551		1284.39	0.01511581		1814.39	0.00819513		2344.38	0.00331887		2874.38	-0.00645147		3404.37	0.0105945		3934.37	0.00035592
224.6	-0.00726976		754.59	0.00249494		1284.59	0.01512802		1814.59	0.00808605		2344.58	0.00328948		2874.58	-0.00714734		3404.57	0.01115071		3934.57	-0.00145165
224.8	-0.00756077		754.79	0.00219428		1284.79	0.0147429		1814.79	0.00844028		2344.78	0.0030766		2874.78	-0.00743633		3404.77	0.01058046		3934.77	-0.00199726
225	-0.00704247		754.99	0.00285315		1284.99	0.01453613		1814.99	0.00900777		2344.98	0.00338064		2874.98	-0.00661669		3404.97	0.01085818		3934.97	-0.00356328
225.2	-0.00668898		755.19	0.00308041		1285.19	0.01392567		1815.19	0.00873975		2345.18	0.00382337		2875.18	-0.00669212		3405.17	0.01117297		3935.17	-0.00456753
225.4	-0.00693292		755.39	0.00294777		1285.39	0.0139672		1815.39	0.00980274		2345.38	0.0033598		2875.38	-0.00552889		3405.37	0.01111684		3935.37	-0.00458945
225.6	-0.00724707		755.59	0.00296442		1285.59	0.01490827		1815.59	0.00959233		2345.58	0.00279109		2875.58	-0.00587449		3405.57	0.01086302		3935.57	-0.00436664
225.8	-0.00697417		755.79	0.00309042		1285.79	0.01406181		1815.79	0.00885138		2345.78	0.00253041		2875.78	-0.00555817		3405.77	0.01088688		3935.77	-0.00390848
226	-0.00707701		755.99	0.00377912		1285.99	0.01335767		1815.99	0.00901168		2345.98	0.00192253		2875.98	-0.00491709		3405.97	0.01056261		3935.97	-0.00270874
226.2	-0.00704352		756.19	0.00390238		1286.19	0.01298482		1816.19	0.0093552		2346.18	0.00151646		2876.18	-0.00440907		3406.17	0.01037541		3936.17	-0.0023112
226.4	-0.00623307		756.39	0.0038092		1286.39	0.01259329		1816.39	0.00921657		2346.38	0.00186926		2876.38	-0.00445864		3406.37	0.01076233		3936.37	-0.00129764
226.6	-0.00708046		756.59	0.00339349		1286.59	0.01206471		1816.59	0.00984548		2346.58	0.00179515		2876.58	-0.00393604		3406.57	0.01004447		3936.57	-0.00041809
226.8	-0.00673636		756.79	0.00413879		1286.79	0.01250259		1816.79	0.01019409		2346.78	0.00195537		2876.78	-0.00414408		3406.77	0.00953889		3936.77	0.00022098
227	-0.00674377		756.99	0.00441131		1286.99	0.0135648		1816.99	0.01016994		2346.98	0.00187708		2876.98	-0.00406218		3406.97	0.00891814		3936.97	0.00042258
227.2	-0.00598252		757.19	0.00436973		1287.19	0.01333309		1817.19	0.01073572		2347.18	0.0017984		2877.18	-0.00403657		3407.17	0.00859941		3937.17	0.00145655
227.4	-0.00581613		757.39	0.00429943		1287.39	0.01311327		1817.39	0.01111723		2347.38	0.00169451		2877.38	-0.0037031		3407.37	0.00823821		3937.37	0.00113168
227.6	-0.00541555		757.59	0.00428109		1287.59	0.01337105		1817.59	0.01153721		2347.58	0.0023758		2877.58	-0.00339808		3407.57	0.00793451		3937.57	0.00169557
227.8	-0.00676315		757.79	0.00500401		1287.79	0.01351791		1817.79	0.01204577		2347.78	0.00279492		2877.78	-0.00386236		3407.77	0.00724789		3937.77	0.00236733
228	-0.00662374		757.99	0.00573183		1287.99	0.01407371		1817.99	0.01147088		2347.98	0.00355343		2877.98	-0.00363667		3407.97	0.00690422		3937.97	0.00282831
228.2	-0.00618094		758.19	0.0052056		1288.19	0.01422845		1818.19	0.01144383		2348.18	0.00454861		2878.18	-0.0040208		3408.17	0.00704023		3938.17	0.0023572
228.4	-0.00601325		758.39	0.00513463		1288.39	0.01499833		1818.39	0.01166333		2348.38	0.00466578		2878.38	-0.00393461		3408.37	0.00774235		3938.37	0.00327779
228.6	-0.00616071		758.59	0.00584359		1288.59	0.01571852		1818.59	0.01118872		2348.58	0.0053325		2878.58	-0.00527635		3408.57	0.00839218		3938.57	0.00239478
228.8	-0.00614931		758.79	0.00460228		1288.79	0.01643647		1818.79	0.01149604		2348.78	0.00593319		2878.78	-0.0058524		3408.77	0.00861756		3938.77	0.00237593
229	-0.00567308		758.99	0.00504196		1288.99	0.0171392		1818.99	0.01150626		2348.98	0.00605397		2878.98	-0.00498666		3408.97	0.01007644		3938.97	0.00163414
229.2	-0.00531771		759.19	0.00432481		1289.19	0.01754878		1819.19	0.01034572		2349.18	0.00644654		2879.18	-0.00474251		3409.17	0.01067626		3939.17	0.00108689
229.4	-0.00539857		759.39	0.00430934		1289.39	0.0177732		1819.39	0.01011689		2349.38	0.00561954		2879.38	-0.0042357		3409.37	0.01089935		3939.37	0.00050719
229.6	-0.0048883		759.59	0.00456115		1289.59	0.01746059		1819.59	0.00933456		2349.58	0.00488156		2879.58	-0.00444539		3409.57	0.01120072		3939.57	-0.000614
229.8	-0.00465431		759.79	0.00386356		1289.79	0.01701286		1819.79	0.00949415		2349.78	0.00459237		2879.78	-0.00383662		3409.77	0.01083773		3939.77	-0.00040559
230	-0.00429929		759.99	0.00363483		1289.99	0.01718915		1819.99	0.00905351		2349.98	0.00410699		2879.98	-0.00420906		3409.97	0.0101051		3939.97	-0.00043586
230.2	-0.00460847		760.19	0.0027864		1290.19	0.01653822		1820.19	0.00894931		2350.18	0.00344833		2880.18	-0.00475594		3410.17	0.00982749		3940.17	-0.00042165
230.4	-0.00499237		760.39	0.00268053		1290.39	0.0162186		1820.39	0.00836811		2350.38	0.00267271		2880.38	-0.0055649		3410.37	0.01044251		3940.37	0.00050918
230.6	-0.00570315		760.59	0.00250306		1290.59	0.01542947		1820.59	0.00802723		2350.58	0.00206327		2880.58	-0.00541293		3410.57	0.00997307		3940.57	0.00074182
230.8	-0.00564118		760.79	0.00292346		1290.79	0.01596957		1820.79	0.00768024		2350.78	0.00178086		2880.78	-0.00627341		3410.77	0.01029661		3940.77	0.00111226
231	-0.00569487		760.99	0.00276634		1290.99	0.01625006		1820.99	0.00785564		2350.98	0.00151947		2880.98	-0.00655911		3410.97	0.0104866		3940.97	0.00146475
231.2	-0.00540961		761.19	0.00322356		1291.19	0.01535023		1821.19	0.0073102		2351.18	0.00137193		2881.18	-0.00671605		3411.17	0.01028493		3941.17	0.00206845
231.4	-0.00586078		761.39	0.00325916		1291.39	0.01503153		1821.39	0.00801492		2351.38	0.00198536		2881.38	-0.00651992		3411.37	0.01085498		3941.37	0.00264247
231.6	-0.00620542		761.59	0.00339829		1291.59	0.01440211		1821.59	0.00813619		2351.58	0.00262208		2881.58	-0.00595073		3411.57	0.01050215		3941.57	0.00396099
231.8	-0.00806603		761.79	0.00416894		1291.79	0.01375102		1821.79	0.0086502		2351.78	0.00355608		2881.78	-0.00664094		3411.77	0.00910406		3941.77	0.00440699
232	-0.00783269		761.99	0.0044571		1291.99	0.01335354		1821.99	0.00874394		2351.98	0.0043218		2881.98	-0.00670826		3411.97	0.00905749		3941.97	0.00413147
232.2	-0.00762197		762.19	0.0042559		1292.19	0.01291114		1822.19	0.00891686		2352.18	0.00476843		2882.18	-0.00603893		3412.17	0.00914984		3942.17	0.00452903
232.4	-0.00814119		762.39	0.00431072		1292.39	0.0129954		1822.39	0.00978123		2352.38	0.00472404		2882.38	-0.00573224		3412.37	0.00874526		3942.37	0.00542632
232.6	-0.00845793		762.59	0.0037526		1292.59	0.01369411		1822.59	0.009304		2352.58	0.00500533		2882.58	-0.00602047		3412.57	0.00891326		3942.57	0.00553621
232.8	-0.00763653		762.79	0.00340259		1292.79	0.01402566		1822.79	0.0101207		2352.78	0.00486792		2882.78	-0.00564881		3412.77	0.00866878		3942.77	0.00560232
233	-0.00723538		762.99	0.00449441		1292.99	0.01378788		1822.99	0.00961852		2352.98	0.00538028		2882.98	-0.00475377		3412.97	0.00823274		3942.97	0.0043541
233.2	-0.00668281		763.19	0.0043938		1293.19	0.01373024		1823.19	0.0091951		2353.18	0.00544873		2883.18	-0.00398314		3413.17	0.0077885		3943.17	0.00387671
233.4	-0.00632967		763.39	0.00489938		1293.39	0.01333322		1823.39	0.00942755		2353.38	0.00524155		2883.38	-0.00345138		3413.37	0.00725941		3943.37	0.00312626
233.6	-0.0058466		763.59	0.00476691		1293.59	0.01371469		1823.59	0.01038522		2353.58	0.00485711		2883.58	-0.00325781		3413.57	0.00663249		3943.57	0.00305158
233.8	-0.00528565		763.79	0.00438748		1293.79	0.01408203		1823.79	0.01089632		2353.78	0.00452849		2883.78	-0.00209852		3413.77	0.00638422		3943.77	0.00354192
234	-0.00521558		763.99	0.0046683		1293.99	0.01466381		1823.99	0.01121128		2353.98	0.00421721		2883.98	-0.00189224		3413.97	0.00628523		3943.97	0.00405615
234.2	-0.00542534		764.19	0.00497604		1294.19	0.01439363		1824.19	0.01170277		2354.18	0.00323537		2884.18	-0.00176351		3414.17	0.00690382		3944.17	0.00426219
234.4	-0.0050608		764.39	0.00525802		1294.39	0.01447769		1824.39	0.01138239		2354.38	0.00323899		2884.38	-0.00164769		3414.37	0.00792125		3944.37	0.00496189
234.6	-0.00442039		764.59	0.00526156		1294.59	0.01524298		1824.59	0.01128902		2354.58	0.00337035		2884.58	-0.00124341		3414.57	0.00860264		3944.57	0.00483206
234.8	-0.0038969		764.79	0.00547479		1294.79	0.0161415		1824.79	0.01139076		2354.78	0.00364389		2884.78	-0.0021209		3414.77	0.00914628		3944.77	0.0049448
235	-0.00286742		764.99	0.00505126		1294.99	0.01622227		1824.99	0.0124803		2354.98	0.00428413		2884.98	-0.00288716		3414.97	0.00975352		3944.97	0.005566
235.2	-0.00202359		765.19	0.00510532		1295.19	0.01622043		1825.19	0.01278894		2355.18	0.00350854		2885.18	-0.00283148		3415.17	0.01023108		3945.17	0.00572105
235.4	-0.00221631		765.39	0.00514772		1295.39	0.01628018		1825.39	0.01383371		2355.38	0.00318098		2885.38	-0.00388009		3415.37	0.01129135		3945.37	0.00611249
235.6	-0.00169583		765.59	0.00501585		1295.59	0.01601416		1825.59	0.01480898		2355.58	0.00344665		2885.58	-0.00367594		3415.57	0.01078207		3945.57	0.00574479
235.8	-0.00187403		765.79	0.00504585		1295.79	0.01639122		1825.79	0.01498439		2355.78	0.00263573		2885.78	-0.00571668		3415.77	0.01092521		3945.77	0.00473082
236	-0.00125353		765.99	0.00541025		1295.99	0.01669994		1825.99	0.01516435		2355.98	0.0020256		2885.98	-0.00598395		3415.97	0.01084217		3945.97	0.00406359
236.2	-0.00158534		766.19	0.00505883		1296.19	0.01678599		1826.19	0.01458574		2356.18	0.00226067		2886.18	-0.00656332		3416.17	0.01081601		3946.17	0.00465276
236.4	-0.00195436		766.39	0.00422576		1296.39	0.01636486		1826.39	0.01431299		2356.38	0.00184436		2886.38	-0.0073598		3416.37	0.01051394		3946.37	0.0048724
236.6	-0.00257581		766.59	0.00297061		1296.59	0.01679297		1826.59	0.0138711		2356.58	0.00234793		2886.58	-0.0084691		3416.57	0.01117854		3946.57	0.00396812
236.8	-0.00251695		766.79	0.0034247		1296.79	0.01636976		1826.79	0.013012		2356.78	0.00284495		2886.78	-0.00872718		3416.77	0.01053119		3946.77	0.0027306
237	-0.00335782		766.99	0.00305223		1296.99	0.01626957		1826.99	0.01159639		2356.98	0.00365036		2886.98	-0.00942967		3416.97	0.01035658		3946.97	0.00157819
237.2	-0.00437798		767.19	0.0035415		1297.19	0.01602037		1827.19	0.01129785		2357.18	0.00367849		2887.18	-0.00833156		3417.17	0.01090001		3947.17	0.00107818
237.4	-0.00506373		767.39	0.00375848		1297.39	0.01592274		1827.39	0.01035718		2357.38	0.00368527		2887.38	-0.00816807		3417.37	0.01064388		3947.37	-0.00020099
237.6	-0.00562741		767.59	0.00328717		1297.59	0.01525336		1827.59	0.01018317		2357.58	0.00497838		2887.58	-0.00768706		3417.57	0.01039076		3947.57	-0.00089266
237.8	-0.00629444		767.79	0.00346676		1297.79	0.01535565		1827.79	0.00996372		2357.78	0.00632922		2887.78	-0.00667366		3417.77	0.01071931		3947.77	-0.00067955
238	-0.00666461		767.99	0.00360347		1297.99	0.01580492		1827.99	0.00936391		2357.98	0.00630914		2887.98	-0.00634854		3417.97	0.0110873		3947.97	0.00021609
238.2	-0.00672307		768.19	0.00349698		1298.19	0.01602069		1828.19	0.00920878		2358.18	0.00690029		2888.18	-0.0058936		3418.17	0.01166807		3948.17	0.00047737
238.4	-0.00599071		768.39	0.00313913		1298.39	0.01532797		1828.39	0.00904203		2358.38	0.00784303		2888.38	-0.00495234		3418.37	0.01163025		3948.37	0.00135623
238.6	-0.00555898		768.59	0.00363437		1298.59	0.01667211		1828.59	0.00898384		2358.58	0.00836863		2888.58	-0.00410847		3418.57	0.01220804		3948.57	0.00110241
238.8	-0.00572882		768.79	0.00387344		1298.79	0.01657695		1828.79	0.00946685		2358.78	0.00907512		2888.78	-0.00448918		3418.77	0.01226654		3948.77	0.00113833
239	-0.00550202		768.99	0.00412		1298.99	0.01670925		1828.99	0.01012223		2358.98	0.00870777		2888.98	-0.00505136		3418.97	0.01284131		3948.97	0.00199376
239.2	-0.00529798		769.19	0.00478843		1299.19	0.01661813		1829.19	0.01050349		2359.18	0.00786369		2889.18	-0.00465024		3419.17	0.01256442		3949.17	0.00280354
239.4	-0.00449331		769.39	0.00529085		1299.39	0.01648188		1829.39	0.01070793		2359.38	0.00758491		2889.38	-0.00555436		3419.37	0.01224111		3949.37	0.00326766
239.6	-0.0046969		769.59	0.00540949		1299.59	0.01632509		1829.59	0.01170363		2359.58	0.00741167		2889.58	-0.00529316		3419.57	0.01162255		3949.57	0.00317509
239.8	-0.00511373		769.79	0.00541425		1299.79	0.01726107		1829.79	0.01178124		2359.78	0.00626848		2889.78	-0.00652669		3419.77	0.01171592		3949.77	0.00331017
240	-0.00561467		769.99	0.0056394		1299.99	0.01744425		1829.99	0.012533		2359.98	0.005572		2889.98	-0.00665432		3419.97	0.01163478		3949.97	0.00374487
240.2	-0.0056254		770.19	0.00530087		1300.19	0.01760009		1830.19	0.01177084		2360.18	0.00593359		2890.18	-0.00649508		3420.17	0.0114636		3950.17	0.00368192
240.4	-0.00530311		770.39	0.00429985		1300.39	0.01677926		1830.39	0.01214919		2360.38	0.00466717		2890.38	-0.005985		3420.37	0.01200998		3950.37	0.00349303
240.6	-0.0051847		770.59	0.00329155		1300.59	0.0172839		1830.59	0.01222333		2360.58	0.00422666		2890.58	-0.00575567		3420.57	0.01174888		3950.57	0.00227838
240.8	-0.00582294		770.79	0.00268719		1300.79	0.01739892		1830.79	0.01086484		2360.78	0.00356988		2890.78	-0.00564544		3420.77	0.01099996		3950.77	0.00167941
241	-0.00582585		770.99	0.00299631		1300.99	0.01779107		1830.99	0.01062266		2360.98	0.00302116		2890.98	-0.00499806		3420.97	0.01087135		3950.97	0.00086423
241.2	-0.00576381		771.19	0.00329083		1301.19	0.01774884		1831.19	0.00961884		2361.18	0.0035562		2891.18	-0.0043929		3421.17	0.01121251		3951.17	0.00072912
241.4	-0.00615081		771.39	0.00292432		1301.39	0.01790344		1831.39	0.00906029		2361.38	0.00390387		2891.38	-0.00492652		3421.37	0.01120424		3951.37	0.00048908
241.6	-0.00657676		771.59	0.0026719		1301.59	0.01738486		1831.59	0.00902087		2361.58	0.00479743		2891.58	-0.00441493		3421.57	0.01116856		3951.57	0.00078338
241.8	-0.00649038		771.79	0.00254001		1301.79	0.0180627		1831.79	0.00883278		2361.78	0.00472184		2891.78	-0.00365383		3421.77	0.0117081		3951.77	0.00134481
242	-0.00530568		771.99	0.00194293		1301.99	0.01827477		1831.99	0.00927637		2361.98	0.00403141		2891.98	-0.00342577		3421.97	0.01207597		3951.97	0.00200201
242.2	-0.0046374		772.19	0.00136911		1302.19	0.0180748		1832.19	0.00965486		2362.18	0.0041947		2892.18	-0.00266007		3422.17	0.01222839		3952.17	0.00255231
242.4	-0.00408461		772.39	0.00151796		1302.39	0.01696904		1832.39	0.00968013		2362.38	0.00403391		2892.38	-0.00186282		3422.37	0.0116257		3952.37	0.00261148
242.6	-0.00427081		772.59	0.00242994		1302.59	0.01828518		1832.59	0.01001583		2362.58	0.00552856		2892.58	-0.00169065		3422.57	0.0125734		3952.57	0.00169952
242.8	-0.00452831		772.79	0.00314793		1302.79	0.01698406		1832.79	0.00991801		2362.78	0.00669963		2892.78	-0.00216845		3422.77	0.01266357		3952.77	0.0023562
243	-0.00424797		772.99	0.00390585		1302.99	0.01681105		1832.99	0.01026391		2362.98	0.0061838		2892.98	-0.00335739		3422.97	0.01258218		3952.97	0.00306124
243.2	-0.00442601		773.19	0.00398677		1303.19	0.01657538		1833.19	0.01098571		2363.18	0.00592729		2893.18	-0.00301827		3423.17	0.01098908		3953.17	0.00317577
243.4	-0.00470656		773.39	0.00492152		1303.39	0.01686343		1833.39	0.01152458		2363.38	0.00569634		2893.38	-0.00303179		3423.37	0.01035737		3953.37	0.00198793
243.6	-0.0056466		773.59	0.00628031		1303.59	0.01711361		1833.59	0.01218515		2363.58	0.00583866		2893.58	-0.0028768		3423.57	0.00997854		3953.57	0.00134904
243.8	-0.0060935		773.79	0.00581716		1303.79	0.01738033		1833.79	0.01285925		2363.78	0.00562631		2893.78	-0.00290885		3423.77	0.00988459		3953.77	0.00073016
244	-0.00673943		773.99	0.00611085		1303.99	0.01734747		1833.99	0.0133813		2363.98	0.00483575		2893.98	-0.00249183		3423.97	0.0100582		3953.97	0.00021289
244.2	-0.00605821		774.19	0.00539374		1304.19	0.01693206		1834.19	0.01361082		2364.18	0.00459177		2894.18	-0.00193984		3424.17	0.0096026		3954.17	-0.00063655
244.4	-0.00630171		774.39	0.00476844		1304.39	0.01737025		1834.39	0.01405782		2364.38	0.00475219		2894.38	-0.00224943		3424.37	0.00883502		3954.37	-0.00044803
244.6	-0.00621439		774.59	0.00458058		1304.59	0.01761513		1834.59	0.01375954		2364.58	0.00462414		2894.58	-0.00285623		3424.57	0.0082056		3954.57	-0.00100903
244.8	-0.00745851		774.79	0.00393067		1304.79	0.01776505		1834.79	0.0128748		2364.78	0.00500677		2894.78	-0.00280669		3424.77	0.00853682		3954.77	-0.00143461
245	-0.00638185		774.99	0.00409412		1304.99	0.01725313		1834.99	0.0132138		2364.98	0.00506801		2894.98	-0.00201863		3424.97	0.00853662		3954.97	-0.00155017
245.2	-0.00710216		775.19	0.00294548		1305.19	0.01671212		1835.19	0.01248168		2365.18	0.00559789		2895.18	-0.00362948		3425.17	0.00926842		3955.17	-0.0005835
245.4	-0.00739248		775.39	0.00182244		1305.39	0.01720022		1835.39	0.01339771		2365.38	0.00523425		2895.38	-0.00374034		3425.37	0.00976054		3955.37	-0.00040291
245.6	-0.00702845		775.59	0.00113524		1305.59	0.01695247		1835.59	0.01354729		2365.58	0.00450346		2895.58	-0.00383518		3425.57	0.0097148		3955.57	-0.00034111
245.8	-0.006333		775.79	0.00052443		1305.79	0.01788538		1835.79	0.01317541		2365.78	0.00366619		2895.78	-0.00368411		3425.77	0.00969141		3955.77	0.00017792
246	-0.00448404		775.99	0.00003599		1305.99	0.01832699		1835.99	0.01353427		2365.98	0.0033172		2895.98	-0.00375686		3425.97	0.01029409		3955.97	0.00135383
246.2	-0.0038866		776.19	0.00082027		1306.19	0.01789272		1836.19	0.01315575		2366.18	0.00392984		2896.18	-0.00313219		3426.17	0.01084015		3956.17	0.00231857
246.4	-0.00358026		776.39	0.00136264		1306.39	0.01815039		1836.39	0.01247885		2366.38	0.00420141		2896.38	-0.00276986		3426.37	0.01124448		3956.37	0.00231787
246.6	-0.00324816		776.59	0.00239602		1306.59	0.01888547		1836.59	0.01181174		2366.58	0.00563122		2896.58	-0.00307352		3426.57	0.01180243		3956.57	0.00350861
246.8	-0.00343993		776.79	0.00319249		1306.79	0.01809234		1836.79	0.01113397		2366.78	0.00577687		2896.78	-0.00329088		3426.77	0.01209932		3956.77	0.00531289
247	-0.00386023		776.99	0.00432794		1306.99	0.01836571		1836.99	0.01081393		2366.98	0.0051115		2896.98	-0.004118		3426.97	0.0115018		3956.97	0.00545726
247.2	-0.00507465		777.19	0.00510743		1307.19	0.01775584		1837.19	0.0112251		2367.18	0.00531643		2897.18	-0.00361484		3427.17	0.01065436		3957.17	0.00579129
247.4	-0.00560682		777.39	0.00669124		1307.39	0.01722537		1837.39	0.01105241		2367.38	0.00579154		2897.38	-0.00373585		3427.37	0.0102873		3957.37	0.00533578
247.6	-0.00587052		777.59	0.00708518		1307.59	0.01725332		1837.59	0.01105267		2367.58	0.00562859		2897.58	-0.00395155		3427.57	0.01052363		3957.57	0.00472186
247.8	-0.0067514		777.79	0.00695202		1307.79	0.01696746		1837.79	0.01169095		2367.78	0.00560029		2897.78	-0.00336915		3427.77	0.00989052		3957.77	0.00457872
248	-0.00692995		777.99	0.00698365		1307.99	0.01864006		1837.99	0.01111136		2367.98	0.00546208		2897.98	-0.00328989		3427.97	0.01038792		3957.97	0.00425801
248.2	-0.00695031		778.19	0.0066797		1308.19	0.01892555		1838.19	0.01115856		2368.18	0.00582283		2898.18	-0.00373581		3428.17	0.01016867		3958.17	0.00415834
248.4	-0.00739527		778.39	0.00679629		1308.39	0.01900839		1838.39	0.0110383		2368.38	0.00651474		2898.38	-0.00382106		3428.37	0.01008212		3958.37	0.00375958
248.6	-0.00806612		778.59	0.00646783		1308.59	0.01793527		1838.59	0.01079897		2368.58	0.00600171		2898.58	-0.00391936		3428.57	0.01044699		3958.57	0.00351258
248.8	-0.00898201		778.79	0.0056035		1308.79	0.01755822		1838.79	0.01072934		2368.78	0.00527586		2898.78	-0.00328771		3428.77	0.01025561		3958.77	0.00339745
249	-0.00821407		778.99	0.00490227		1308.99	0.01758267		1838.99	0.01109211		2368.98	0.00548647		2898.98	-0.00414213		3428.97	0.00967599		3958.97	0.00273048
249.2	-0.00850005		779.19	0.00369934		1309.19	0.01857112		1839.19	0.01146113		2369.18	0.0051436		2899.18	-0.00535387		3429.17	0.00958775		3959.17	0.00319693
249.4	-0.00745906		779.39	0.00325817		1309.39	0.0191031		1839.39	0.01201263		2369.38	0.00422885		2899.38	-0.00459837		3429.37	0.00963715		3959.37	0.00284962
249.6	-0.00700138		779.59	0.00302714		1309.59	0.0187417		1839.59	0.01166049		2369.58	0.00419674		2899.58	-0.00472047		3429.57	0.00912128		3959.57	0.00223685
249.8	-0.00687061		779.79	0.00310725		1309.79	0.01885346		1839.79	0.0118528		2369.78	0.00311642		2899.78	-0.00357166		3429.77	0.00879645		3959.77	0.00283327
250	-0.00577324		779.99	0.00302412		1309.99	0.01813095		1839.99	0.01160225		2369.98	0.00343174		2899.98	-0.00307799		3429.97	0.00872928		3959.97	0.00275171
250.2	-0.00552579		780.19	0.00398772		1310.19	0.01797268		1840.19	0.01161137		2370.18	0.00379015		2900.18	-0.00283178		3430.17	0.0086531		3960.17	0.00346557
250.4	-0.00561199		780.39	0.00315943		1310.39	0.01845715		1840.39	0.01170683		2370.38	0.00334573		2900.38	-0.00267773		3430.37	0.0084388		3960.37	0.00411178
250.6	-0.00610404		780.59	0.00300919		1310.59	0.01716996		1840.59	0.01233581		2370.58	0.00331643		2900.58	-0.00236623		3430.57	0.00790383		3960.57	0.00560351
250.8	-0.00656605		780.79	0.00335337		1310.79	0.01688106		1840.79	0.01277237		2370.78	0.00264992		2900.78	-0.00263469		3430.77	0.0080842		3960.77	0.00578456
251	-0.00770091		780.99	0.00423244		1310.99	0.01664616		1840.99	0.0135207		2370.98	0.00270208		2900.98	-0.00297332		3430.97	0.00765254		3960.97	0.00634654
251.2	-0.00853965		781.19	0.00472085		1311.19	0.0163022		1841.19	0.01412791		2371.18	0.00293073		2901.18	-0.00278379		3431.17	0.00707279		3961.17	0.00684738
251.4	-0.00835143		781.39	0.00549478		1311.39	0.01632434		1841.39	0.01363548		2371.38	0.00286265		2901.38	-0.00334364		3431.37	0.00680542		3961.37	0.00616295
251.6	-0.00889594		781.59	0.00476935		1311.59	0.0172105		1841.59	0.01362959		2371.58	0.00288914		2901.58	-0.00296625		3431.57	0.00717616		3961.57	0.00645845
251.8	-0.00901452		781.79	0.00585928		1311.79	0.01826017		1841.79	0.01356277		2371.78	0.00346518		2901.78	-0.00272025		3431.77	0.00696822		3961.77	0.00689569
252	-0.00844802		781.99	0.00497982		1311.99	0.019256		1841.99	0.01236463		2371.98	0.00433376		2901.98	-0.00270403		3431.97	0.00702568		3961.97	0.00667823
252.2	-0.00876718		782.19	0.00487796		1312.19	0.01879465		1842.19	0.01275567		2372.18	0.00453455		2902.18	-0.00287745		3432.17	0.00663386		3962.17	0.0074488
252.4	-0.00904791		782.39	0.00488913		1312.39	0.01857884		1842.39	0.01330408		2372.38	0.0047766		2902.38	-0.00356893		3432.37	0.00681267		3962.37	0.00677436
252.6	-0.00861186		782.59	0.00523722		1312.59	0.01846622		1842.59	0.01327847		2372.58	0.00512288		2902.58	-0.00455		3432.57	0.00631092		3962.57	0.00694855
252.8	-0.00829253		782.79	0.00557185		1312.79	0.01943129		1842.79	0.01341411		2372.78	0.00533633		2902.78	-0.00463752		3432.77	0.00688608		3962.77	0.00620182
253	-0.00728168		782.99	0.00584824		1312.99	0.01965696		1842.99	0.01382565		2372.98	0.00619863		2902.98	-0.00471548		3432.97	0.00709256		3962.97	0.00545191
253.2	-0.00648715		783.19	0.00600801		1313.19	0.02032502		1843.19	0.01471835		2373.18	0.00623931		2903.18	-0.00488562		3433.17	0.00717617		3963.17	0.00552582
253.4	-0.00577529		783.39	0.00564489		1313.39	0.0197018		1843.39	0.01462872		2373.38	0.00575881		2903.38	-0.00478116		3433.37	0.00784251		3963.37	0.00467503
253.6	-0.0056223		783.59	0.00595711		1313.59	0.0189324		1843.59	0.0139255		2373.58	0.00659085		2903.58	-0.00427813		3433.57	0.00778195		3963.57	0.00398108
253.8	-0.00511593		783.79	0.00621549		1313.79	0.01844776		1843.79	0.0132814		2373.78	0.00586913		2903.78	-0.00290943		3433.77	0.00804789		3963.77	0.00430074
254	-0.00385991		783.99	0.00598037		1313.99	0.01794393		1843.99	0.01287234		2373.98	0.00737954		2903.98	-0.00253423		3433.97	0.00839827		3963.97	0.00431496
254.2	-0.00319754		784.19	0.0060649		1314.19	0.01805817		1844.19	0.01341348		2374.18	0.00784015		2904.18	-0.00236072		3434.17	0.00931109		3964.17	0.00541482
254.4	-0.0029214		784.39	0.00523278		1314.39	0.01729163		1844.39	0.01313874		2374.38	0.00731247		2904.38	-0.00245436		3434.37	0.00935264		3964.37	0.00537591
254.6	-0.00334016		784.59	0.00539095		1314.59	0.01658381		1844.59	0.01292282		2374.58	0.00753025		2904.58	-0.00194715		3434.57	0.00976694		3964.57	0.00590588
254.8	-0.00350876		784.79	0.00588561		1314.79	0.01720288		1844.79	0.01264359		2374.78	0.00707221		2904.78	-0.00293822		3434.77	0.01061754		3964.77	0.00603176
255	-0.00379455		784.99	0.00590666		1314.99	0.01745225		1844.99	0.01303109		2374.98	0.00753581		2904.98	-0.00281705		3434.97	0.01035112		3964.97	0.00666337
255.2	-0.00399426		785.19	0.0056809		1315.19	0.01779889		1845.19	0.0113772		2375.18	0.00729774		2905.18	-0.002872		3435.17	0.01000928		3965.17	0.0067759
255.4	-0.00461765		785.39	0.00512932		1315.39	0.0174978		1845.39	0.010597		2375.38	0.00736379		2905.38	-0.00275622		3435.37	0.01009059		3965.37	0.00633947
255.6	-0.00530365		785.59	0.00463018		1315.59	0.01734093		1845.59	0.01082735		2375.58	0.00725314		2905.58	-0.00278465		3435.57	0.01045348		3965.57	0.00665987
255.8	-0.00509103		785.79	0.00609886		1315.79	0.01766314		1845.79	0.01035958		2375.78	0.00689381		2905.78	-0.00277677		3435.77	0.01066703		3965.77	0.00640193
256	-0.00603691		785.99	0.00579229		1315.99	0.01731828		1845.99	0.01001824		2375.98	0.00667238		2905.98	-0.00234996		3435.97	0.0097544		3965.97	0.0065041
256.2	-0.00776721		786.19	0.00723947		1316.19	0.01764448		1846.19	0.010428		2376.18	0.00667778		2906.18	-0.00276379		3436.17	0.00961647		3966.17	0.00666344
256.4	-0.00821425		786.39	0.00820613		1316.39	0.01758536		1846.39	0.01033758		2376.38	0.00629287		2906.38	-0.00416337		3436.37	0.00952859		3966.37	0.00572979
256.6	-0.00795213		786.59	0.00867607		1316.59	0.01708127		1846.59	0.00968318		2376.58	0.00553248		2906.58	-0.00354485		3436.57	0.0095583		3966.57	0.0056617
256.8	-0.00914796		786.79	0.00869225		1316.79	0.01764326		1846.79	0.01047021		2376.78	0.00493343		2906.78	-0.00278567		3436.77	0.00972525		3966.77	0.00540077
257	-0.00887052		786.99	0.00859147		1316.99	0.01729277		1846.99	0.01098735		2376.98	0.00425453		2906.98	-0.00137048		3436.97	0.00890928		3966.97	0.00567759
257.2	-0.00936069		787.19	0.00841368		1317.19	0.01715155		1847.19	0.01111968		2377.18	0.00356891		2907.18	-0.00188846		3437.17	0.0092361		3967.17	0.00551778
257.4	-0.0100356		787.39	0.00777034		1317.39	0.01651252		1847.39	0.01187655		2377.38	0.00264023		2907.38	-0.00161826		3437.37	0.00947238		3967.37	0.00516842
257.6	-0.00989715		787.59	0.00773549		1317.59	0.01492388		1847.59	0.01178259		2377.58	0.0030382		2907.58	-0.0012623		3437.57	0.00911109		3967.57	0.00556999
257.8	-0.00945494		787.79	0.00752839		1317.79	0.01533379		1847.79	0.01243059		2377.78	0.00341546		2907.78	-0.0014151		3437.77	0.0090838		3967.77	0.00553352
258	-0.00910896		787.99	0.00734489		1317.99	0.0146114		1847.99	0.01308051		2377.98	0.00415389		2907.98	-0.00170868		3437.97	0.00973242		3967.97	0.00614286
258.2	-0.00911947		788.19	0.00701461		1318.19	0.01459344		1848.19	0.01305868		2378.18	0.00332074		2908.18	-0.00255275		3438.17	0.00959448		3968.17	0.00614004
258.4	-0.00929774		788.39	0.00565472		1318.39	0.01485187		1848.39	0.01281435		2378.38	0.00346273		2908.38	-0.00294211		3438.37	0.00976832		3968.37	0.00629587
258.6	-0.00937839		788.59	0.00508417		1318.59	0.0145821		1848.59	0.01307148		2378.58	0.0039595		2908.58	-0.00341227		3438.57	0.0105785		3968.57	0.00590106
258.8	-0.00904345		788.79	0.00418814		1318.79	0.01490786		1848.79	0.01356809		2378.78	0.00454269		2908.78	-0.00465012		3438.77	0.01046679		3968.77	0.00556945
259	-0.00889206		788.99	0.00336218		1318.99	0.01518511		1848.99	0.01349029		2378.98	0.00494001		2908.98	-0.00401483		3438.97	0.01058503		3968.97	0.00542114
259.2	-0.00933136		789.19	0.00315567		1319.19	0.01485204		1849.19	0.01331398		2379.18	0.00553487		2909.18	-0.00498638		3439.17	0.01095854		3969.17	0.00554484
259.4	-0.00946401		789.39	0.00361721		1319.39	0.01495041		1849.39	0.01376809		2379.38	0.00534434		2909.38	-0.00531757		3439.37	0.01123156		3969.37	0.00578518
259.6	-0.00913219		789.59	0.00408424		1319.59	0.01552103		1849.59	0.01357168		2379.58	0.00492134		2909.58	-0.00613714		3439.57	0.01308975		3969.57	0.00630686
259.8	-0.00953731		789.79	0.00483261		1319.79	0.01594721		1849.79	0.01240757		2379.78	0.00478113		2909.78	-0.00666925		3439.77	0.01361122		3969.77	0.00699803
260	-0.01076631		789.99	0.00447362		1319.99	0.01745944		1849.99	0.012762		2379.98	0.00487569		2909.98	-0.0061186		3439.97	0.01318739		3969.97	0.00695002
260.2	-0.00931738		790.19	0.00516002		1320.19	0.01775585		1850.19	0.01142775		2380.18	0.00546764		2910.18	-0.00690201		3440.17	0.0131558		3970.17	0.00678835
260.4	-0.0080819		790.39	0.00490487		1320.39	0.01698702		1850.39	0.01056962		2380.38	0.00518168		2910.38	-0.00639052		3440.37	0.01306205		3970.37	0.00669005
260.6	-0.00729619		790.59	0.00482253		1320.59	0.01733848		1850.59	0.00967483		2380.58	0.00531767		2910.58	-0.00444074		3440.57	0.01297893		3970.57	0.00662737
260.8	-0.0067192		790.79	0.00463794		1320.79	0.01781548		1850.79	0.00970315		2380.78	0.0049321		2910.78	-0.00318797		3440.77	0.01271495		3970.77	0.00727223
261	-0.00565346		790.99	0.00549453		1320.99	0.0184635		1850.99	0.00922984		2380.98	0.00418091		2910.98	-0.00223714		3440.97	0.0123182		3970.97	0.0078331
261.2	-0.00556071		791.19	0.00639361		1321.19	0.01850064		1851.19	0.00934437		2381.18	0.00383274		2911.18	-0.00215284		3441.17	0.01173542		3971.17	0.00714953
261.4	-0.00443674		791.39	0.00598627		1321.39	0.01866905		1851.39	0.01030111		2381.38	0.00383532		2911.38	-0.0019353		3441.37	0.01128368		3971.37	0.00723058
261.6	-0.00388754		791.59	0.00599117		1321.59	0.01882357		1851.59	0.0104338		2381.58	0.00344053		2911.58	-0.000939		3441.57	0.01047413		3971.57	0.00725841
261.8	-0.003668		791.79	0.00678301		1321.79	0.02024875		1851.79	0.00981076		2381.78	0.00331995		2911.78	-0.00069812		3441.77	0.00989378		3971.77	0.00683745
262	-0.00333813		791.99	0.00685411		1321.99	0.02025933		1851.99	0.00958907		2381.98	0.00331668		2911.98	0.00028316		3441.97	0.00930889		3971.97	0.00732823
262.2	-0.003536		792.19	0.00665104		1322.19	0.02052402		1852.19	0.00919411		2382.18	0.00335438		2912.18	0.00035517		3442.17	0.00872404		3972.17	0.00709721
262.4	-0.00361135		792.39	0.00746822		1322.39	0.02094922		1852.39	0.00963415		2382.38	0.00402716		2912.38	0.00027326		3442.37	0.00929425		3972.37	0.00755725
262.6	-0.00465853		792.59	0.00845566		1322.59	0.0198971		1852.59	0.00979047		2382.58	0.00335735		2912.58	0.00025634		3442.57	0.00896244		3972.57	0.00703777
262.8	-0.00610655		792.79	0.00869823		1322.79	0.01995618		1852.79	0.0109086		2382.78	0.00472397		2912.78	-0.00015774		3442.77	0.00856159		3972.77	0.00744142
263	-0.00655565		792.99	0.00898102		1322.99	0.01977573		1852.99	0.0119967		2382.98	0.00459565		2912.98	-0.00039699		3442.97	0.00824864		3972.97	0.00758554
263.2	-0.00763141		793.19	0.00865219		1323.19	0.01991776		1853.19	0.01258475		2383.18	0.00400464		2913.18	-0.00203594		3443.17	0.00888642		3973.17	0.00871567
263.4	-0.00866994		793.39	0.00816711		1323.39	0.01979211		1853.39	0.01264226		2383.38	0.00310632		2913.38	-0.00253234		3443.37	0.00966661		3973.37	0.00864377
263.6	-0.00931503		793.59	0.00723743		1323.59	0.01968162		1853.59	0.01326455		2383.58	0.0034761		2913.58	-0.00349606		3443.57	0.01132089		3973.57	0.00878281
263.8	-0.01050043		793.79	0.00714131		1323.79	0.01931945		1853.79	0.01351017		2383.78	0.00399159		2913.78	-0.00413611		3443.77	0.01139725		3973.77	0.00785955
264	-0.01121403		793.99	0.00652817		1323.99	0.02048238		1853.99	0.01442251		2383.98	0.00509359		2913.98	-0.00362262		3443.97	0.01203659		3973.97	0.00704225
264.2	-0.01072737		794.19	0.00729458		1324.19	0.01971024		1854.19	0.0139056		2384.18	0.00549518		2914.18	-0.00465904		3444.17	0.01205536		3974.17	0.0065043
264.4	-0.0110414		794.39	0.00716688		1324.39	0.01911697		1854.39	0.01340915		2384.38	0.00518012		2914.38	-0.00397977		3444.37	0.01210766		3974.37	0.00646951
264.6	-0.01178353		794.59	0.00755129		1324.59	0.01985619		1854.59	0.01335908		2384.58	0.00492527		2914.58	-0.00378195		3444.57	0.01159139		3974.57	0.00614998
264.8	-0.01167298		794.79	0.00700968		1324.79	0.01927998		1854.79	0.01412452		2384.78	0.00425116		2914.78	-0.00450629		3444.77	0.01111469		3974.77	0.00717016
265	-0.01079987		794.99	0.00751245		1324.99	0.02025406		1854.99	0.01515378		2384.98	0.00422168		2914.98	-0.00448691		3444.97	0.01058856		3974.97	0.00684762
265.2	-0.01004405		795.19	0.0071441		1325.19	0.01982371		1855.19	0.0151814		2385.18	0.00487595		2915.18	-0.00444593		3445.17	0.01049714		3975.17	0.00629684
265.4	-0.00826493		795.39	0.00692984		1325.39	0.01978293		1855.39	0.01520019		2385.38	0.00518297		2915.38	-0.00498373		3445.37	0.01042019		3975.37	0.00709386
265.6	-0.00867756		795.59	0.0066865		1325.59	0.02047688		1855.59	0.01490839		2385.58	0.00491162		2915.58	-0.00374636		3445.57	0.0095463		3975.57	0.00694778
265.8	-0.00692976		795.79	0.00735662		1325.79	0.0208959		1855.79	0.01390943		2385.78	0.00510169		2915.78	-0.00355777		3445.77	0.00909192		3975.77	0.00736286
266	-0.00684398		795.99	0.00747927		1325.99	0.02107739		1855.99	0.01404468		2385.98	0.00525277		2915.98	-0.00341884		3445.97	0.00897397		3975.97	0.00787049
266.2	-0.00714579		796.19	0.00739058		1326.19	0.02040996		1856.19	0.01377015		2386.18	0.00502264		2916.18	-0.00291179		3446.17	0.00991665		3976.17	0.00782272
266.4	-0.00719317		796.39	0.00744906		1326.39	0.02045139		1856.39	0.01433432		2386.38	0.00499658		2916.38	-0.00271137		3446.37	0.00998543		3976.37	0.00841599
266.6	-0.00823527		796.59	0.00639964		1326.59	0.02045879		1856.59	0.01429569		2386.58	0.00415705		2916.58	-0.00271489		3446.57	0.0094997		3976.57	0.00842517
266.8	-0.00818504		796.79	0.00618307		1326.79	0.02059047		1856.79	0.01577916		2386.78	0.00551286		2916.78	-0.00357755		3446.77	0.00908425		3976.77	0.00865091
267	-0.00730006		796.99	0.00525753		1326.99	0.02097046		1856.99	0.01589113		2386.98	0.00514332		2916.98	-0.00369215		3446.97	0.00850072		3976.97	0.00847465
267.2	-0.00762322		797.19	0.00467134		1327.19	0.02129277		1857.19	0.01547036		2387.18	0.00454287		2917.18	-0.00339754		3447.17	0.00929378		3977.17	0.00867579
267.4	-0.00820448		797.39	0.00481377		1327.39	0.02041403		1857.39	0.01585386		2387.38	0.00547823		2917.38	-0.00299763		3447.37	0.00930847		3977.37	0.00781707
267.6	-0.00801286		797.59	0.00577679		1327.59	0.02057948		1857.59	0.01574438		2387.58	0.00624814		2917.58	-0.0029831		3447.57	0.01044808		3977.57	0.00724459
267.8	-0.00793123		797.79	0.0066031		1327.79	0.02170961		1857.79	0.01618881		2387.78	0.00623879		2917.78	-0.00199091		3447.77	0.01111461		3977.77	0.00693486
268	-0.00782246		797.99	0.0067297		1327.99	0.02135477		1857.99	0.01616068		2387.98	0.00651769		2917.98	-0.00193895		3447.97	0.01190536		3977.97	0.00723302
268.2	-0.00763416		798.19	0.00755772		1328.19	0.02137109		1858.19	0.01527455		2388.18	0.00541175		2918.18	-0.00272874		3448.17	0.01154608		3978.17	0.00742177
268.4	-0.00705743		798.39	0.00755557		1328.39	0.02086924		1858.39	0.015566		2388.38	0.00483571		2918.38	-0.00231725		3448.37	0.01132961		3978.37	0.00761271
268.6	-0.00782692		798.59	0.00801308		1328.59	0.02083866		1858.59	0.01544056		2388.58	0.0048008		2918.58	-0.00254624		3448.57	0.01039496		3978.57	0.00764761
268.8	-0.00702257		798.79	0.00795752		1328.79	0.02130985		1858.79	0.01577023		2388.78	0.00456852		2918.78	-0.00327088		3448.77	0.01002129		3978.77	0.00789166
269	-0.00629549		798.99	0.00796026		1328.99	0.02160703		1858.99	0.0155697		2388.98	0.00496935		2918.98	-0.00263896		3448.97	0.01078804		3978.97	0.00692744
269.2	-0.0065486		799.19	0.00846407		1329.19	0.02090239		1859.19	0.01385927		2389.18	0.00430937		2919.18	-0.00315245		3449.17	0.01096708		3979.17	0.00745946
269.4	-0.00667774		799.39	0.00931576		1329.39	0.0211589		1859.39	0.01342561		2389.38	0.00388683		2919.38	-0.00318042		3449.37	0.01094179		3979.37	0.00805672
269.6	-0.00762342		799.59	0.00884939		1329.59	0.02080302		1859.59	0.01317725		2389.58	0.00368596		2919.58	-0.003021		3449.57	0.01056089		3979.57	0.00807969
269.8	-0.00689067		799.79	0.00908979		1329.79	0.02043082		1859.79	0.01265085		2389.78	0.00354784		2919.78	-0.00385195		3449.77	0.01089002		3979.77	0.00856057
270	-0.00825429		799.99	0.00806359		1329.99	0.02027265		1859.99	0.01174583		2389.98	0.00395423		2919.98	-0.00483082		3449.97	0.01110585		3979.97	0.00913096
270.2	-0.00863812		800.19	0.00666146		1330.19	0.02009776		1860.19	0.01146718		2390.18	0.00381281		2920.18	-0.00429748		3450.17	0.01087421		3980.17	0.00883829
270.4	-0.00881591		800.39	0.00597098		1330.39	0.02001494		1860.39	0.01163109		2390.38	0.00413601		2920.38	-0.00548709		3450.37	0.01056603		3980.37	0.00958385
270.6	-0.00932067		800.59	0.00558113		1330.59	0.01983513		1860.59	0.0118815		2390.58	0.00459719		2920.58	-0.00563905		3450.57	0.01040035		3980.57	0.0103093
270.8	-0.00879927		800.79	0.00535438		1330.79	0.01945464		1860.79	0.01220049		2390.78	0.00562832		2920.78	-0.00535618		3450.77	0.01040601		3980.77	0.00979886
271	-0.00894833		800.99	0.0055703		1330.99	0.01953607		1860.99	0.01121975		2390.98	0.00619634		2920.98	-0.00496623		3450.97	0.00996813		3980.97	0.00992867
271.2	-0.00912716		801.19	0.0062909		1331.19	0.01959174		1861.19	0.01104811		2391.18	0.00597321		2921.18	-0.00399092		3451.17	0.01061107		3981.17	0.00953961
271.4	-0.0094365		801.39	0.00641513		1331.39	0.01885335		1861.39	0.01150726		2391.38	0.00644709		2921.38	-0.00422304		3451.37	0.01034854		3981.37	0.00927485
271.6	-0.00883262		801.59	0.00689795		1331.59	0.01908683		1861.59	0.01218137		2391.58	0.00654979		2921.58	-0.00396687		3451.57	0.01117356		3981.57	0.00941705
271.8	-0.00788115		801.79	0.00752117		1331.79	0.01883668		1861.79	0.01373337		2391.78	0.00616709		2921.78	-0.00295886		3451.77	0.01126257		3981.77	0.00982764
272	-0.00797026		801.99	0.00824885		1331.99	0.01766712		1861.99	0.01284314		2391.98	0.00578729		2921.98	-0.0032198		3451.97	0.01075808		3981.97	0.00950389
272.2	-0.00792255		802.19	0.00912365		1332.19	0.01839625		1862.19	0.01301861		2392.18	0.00462469		2922.18	-0.00310616		3452.17	0.01076483		3982.17	0.00937684
272.4	-0.00790564		802.39	0.00907321		1332.39	0.01885607		1862.39	0.01407827		2392.38	0.00447818		2922.38	-0.00198058		3452.37	0.01058902		3982.37	0.00945229
272.6	-0.00815939		802.59	0.00949602		1332.59	0.01949295		1862.59	0.01339988		2392.58	0.00344267		2922.58	-0.0016054		3452.57	0.00981141		3982.57	0.00841487
272.8	-0.00865524		802.79	0.01013966		1332.79	0.02034749		1862.79	0.01346447		2392.78	0.00259788		2922.78	-0.0004267		3452.77	0.01032145		3982.77	0.00713808
273	-0.00829491		802.99	0.01061867		1332.99	0.01971689		1862.99	0.01308941		2392.98	0.0023416		2922.98	0.00104278		3452.97	0.01137508		3982.97	0.00732548
273.2	-0.00828336		803.19	0.01133906		1333.19	0.02005885		1863.19	0.01269972		2393.18	0.00091619		2923.18	0.00098266		3453.17	0.01110452		3983.17	0.00753874
273.4	-0.00838855		803.39	0.01076396		1333.39	0.02077113		1863.39	0.01342842		2393.38	0.00104786		2923.38	0.00092228		3453.37	0.01089345		3983.37	0.00755201
273.6	-0.0082961		803.59	0.01041615		1333.59	0.0212169		1863.59	0.01379709		2393.58	0.00042638		2923.58	0.00089704		3453.57	0.01026235		3983.57	0.00713233
273.8	-0.00821376		803.79	0.01045963		1333.79	0.02138485		1863.79	0.01305348		2393.78	0.00013485		2923.78	0.00036919		3453.77	0.01023117		3983.77	0.00655444
274	-0.0084108		803.99	0.00988113		1333.99	0.0223016		1863.99	0.01279606		2393.98	0.00036429		2923.98	0.00054446		3453.97	0.00994221		3983.97	0.006707
274.2	-0.00841843		804.19	0.00925174		1334.19	0.02234391		1864.19	0.01324644		2394.18	-0.00005527		2924.18	0.00120146		3454.17	0.01073444		3984.17	0.00642913
274.4	-0.00813966		804.39	0.00877521		1334.39	0.02217879		1864.39	0.01296925		2394.38	0.00051493		2924.38	0.00170917		3454.37	0.01160281		3984.37	0.00744508
274.6	-0.00836987		804.59	0.00867221		1334.59	0.02246344		1864.59	0.01342092		2394.58	0.00170536		2924.58	0.00243541		3454.57	0.01172482		3984.57	0.00801337
274.8	-0.00813887		804.79	0.00868473		1334.79	0.02286072		1864.79	0.01330346		2394.78	0.00189567		2924.78	0.00217977		3454.77	0.0122633		3984.77	0.0071547
275	-0.00862776		804.99	0.00885119		1334.99	0.02387292		1864.99	0.01324819		2394.98	0.00240914		2924.98	0.00096154		3454.97	0.01137271		3984.97	0.00789426
275.2	-0.00868405		805.19	0.0079431		1335.19	0.02383535		1865.19	0.01387936		2395.18	0.00254921		2925.18	0.00045494		3455.17	0.01097712		3985.17	0.00781619
275.4	-0.00907236		805.39	0.00776187		1335.39	0.02349143		1865.39	0.01473638		2395.38	0.00360082		2925.38	-0.00046722		3455.37	0.01058358		3985.37	0.00798102
275.6	-0.00827058		805.59	0.00841727		1335.59	0.02349589		1865.59	0.01536394		2395.58	0.00404076		2925.58	-0.00103718		3455.57	0.01062032		3985.57	0.00846767
275.8	-0.00790939		805.79	0.00895793		1335.79	0.02313182		1865.79	0.01585122		2395.78	0.00394394		2925.78	-0.0015976		3455.77	0.01053779		3985.77	0.00845826
276	-0.00878059		805.99	0.00927034		1335.99	0.02301854		1865.99	0.01479271		2395.98	0.00356229		2925.98	-0.00207875		3455.97	0.01100149		3985.97	0.00828514
276.2	-0.00874273		806.19	0.00909769		1336.19	0.02301358		1866.19	0.01532466		2396.18	0.0041235		2926.18	-0.00232899		3456.17	0.011447		3986.17	0.00859516
276.4	-0.00948642		806.39	0.00874484		1336.39	0.02244908		1866.39	0.01462325		2396.38	0.00498106		2926.38	-0.00265759		3456.37	0.01168275		3986.37	0.00885414
276.6	-0.00902687		806.59	0.00888074		1336.59	0.02235439		1866.59	0.01362509		2396.58	0.00502797		2926.58	-0.00315583		3456.57	0.01155354		3986.57	0.00815985
276.8	-0.00940735		806.79	0.00890652		1336.79	0.02149009		1866.79	0.01314651		2396.78	0.00592485		2926.78	-0.00274373		3456.77	0.01187325		3986.77	0.00758098
277	-0.0080869		806.99	0.00806327		1336.99	0.02081667		1866.99	0.01340918		2396.98	0.00711712		2926.98	-0.00247857		3456.97	0.01193709		3986.97	0.00801718
277.2	-0.00825242		807.19	0.00647274		1337.19	0.02015198		1867.19	0.01289936		2397.18	0.00691517		2927.18	-0.00256603		3457.17	0.01177317		3987.17	0.00801304
277.4	-0.00859315		807.39	0.00555783		1337.39	0.01979594		1867.39	0.01277845		2397.38	0.00755955		2927.38	-0.00207865		3457.37	0.0114435		3987.37	0.0078249
277.6	-0.00894756		807.59	0.00602945		1337.59	0.01934391		1867.59	0.01248385		2397.58	0.00714142		2927.58	-0.00066074		3457.57	0.0122261		3987.57	0.00768185
277.8	-0.00864243		807.79	0.00604763		1337.79	0.01882228		1867.79	0.01144259		2397.78	0.00768023		2927.78	-0.00136389		3457.77	0.01253915		3987.77	0.00767226
278	-0.00841761		807.99	0.00610895		1337.99	0.01861551		1867.99	0.01116581		2397.98	0.00678565		2927.98	-0.00124041		3457.97	0.01344416		3987.97	0.00863346
278.2	-0.00842471		808.19	0.0055725		1338.19	0.01781665		1868.19	0.01094954		2398.18	0.00627251		2928.18	-0.00080734		3458.17	0.01314395		3988.17	0.00872731
278.4	-0.00803528		808.39	0.00520276		1338.39	0.01790244		1868.39	0.01062104		2398.38	0.00637378		2928.38	-0.00037948		3458.37	0.01191872		3988.37	0.00913516
278.6	-0.0080389		808.59	0.00506865		1338.59	0.01774251		1868.59	0.01172593		2398.58	0.00658317		2928.58	-0.00087834		3458.57	0.01136999		3988.57	0.00926493
278.8	-0.00810831		808.79	0.00522133		1338.79	0.01789356		1868.79	0.01144524		2398.78	0.0065553		2928.78	-0.00150591		3458.77	0.01110245		3988.77	0.0096239
279	-0.00793509		808.99	0.00461564		1338.99	0.01781864		1868.99	0.01161261		2398.98	0.00616206		2928.98	-0.00214148		3458.97	0.01016015		3988.97	0.01002336
279.2	-0.0077452		809.19	0.00507677		1339.19	0.01756886		1869.19	0.01240785		2399.18	0.00572234		2929.18	-0.0016966		3459.17	0.01016312		3989.17	0.00981861
279.4	-0.00770913		809.39	0.00608689		1339.39	0.01804265		1869.39	0.01299695		2399.38	0.00538067		2929.38	-0.00097985		3459.37	0.01018431		3989.37	0.01046369
279.6	-0.00693345		809.59	0.00635286		1339.59	0.01841493		1869.59	0.01400034		2399.58	0.00449771		2929.58	-0.00089647		3459.57	0.00989233		3989.57	0.01078424
279.8	-0.00681287		809.79	0.00698851		1339.79	0.01836641		1869.79	0.01379419		2399.78	0.00432191		2929.78	-0.00023211		3459.77	0.00973298		3989.77	0.0108015
280	-0.00678571		809.99	0.00743411		1339.99	0.01854286		1869.99	0.01369336		2399.98	0.00407651		2929.98	0.0002572		3459.97	0.00957352		3989.97	0.0103553
280.2	-0.00654886		810.19	0.00770734		1340.19	0.0191095		1870.19	0.0146135		2400.18	0.00445778		2930.18	0.00005413		3460.17	0.00950393		3990.17	0.00991636
280.4	-0.00684111		810.39	0.00737059		1340.39	0.01963129		1870.39	0.01423118		2400.38	0.00399793		2930.38	0.00000528		3460.37	0.00955023		3990.37	0.00933821
280.6	-0.00668767		810.59	0.0076163		1340.59	0.01998772		1870.59	0.01415383		2400.58	0.00383383		2930.58	0.00041744		3460.57	0.00886761		3990.57	0.00931619
280.8	-0.00727972		810.79	0.00792214		1340.79	0.01967019		1870.79	0.01400649		2400.78	0.003699		2930.78	0.0008349		3460.77	0.00888313		3990.77	0.00913533
281	-0.00672089		810.99	0.00772372		1340.99	0.01985571		1870.99	0.01368866		2400.98	0.00392415		2930.98	0.00210153		3460.97	0.00951197		3990.97	0.00946697
281.2	-0.00772174		811.19	0.00767948		1341.19	0.01957636		1871.19	0.01246818		2401.18	0.00346874		2931.18	0.00297339		3461.17	0.00972425		3991.17	0.00937616
281.4	-0.00770658		811.39	0.0082289		1341.39	0.01956453		1871.39	0.01167295		2401.38	0.00364097		2931.38	0.00339528		3461.37	0.01093238		3991.37	0.00891863
281.6	-0.00780754		811.59	0.00840543		1341.59	0.02022762		1871.59	0.01165089		2401.58	0.00250263		2931.58	0.00246135		3461.57	0.01132613		3991.57	0.00894223
281.8	-0.00780966		811.79	0.00902327		1341.79	0.02100949		1871.79	0.01077312		2401.78	0.00320877		2931.78	0.00093367		3461.77	0.01099971		3991.77	0.008913
282	-0.00809214		811.99	0.00921563		1341.99	0.0209601		1871.99	0.01085081		2401.98	0.00325126		2931.98	0.00057696		3461.97	0.01061696		3991.97	0.00868734
282.2	-0.00827233		812.19	0.00828203		1342.19	0.02078562		1872.19	0.01081206		2402.18	0.00362476		2932.18	0.00095819		3462.17	0.0096591		3992.17	0.00789268
282.4	-0.00807655		812.39	0.00841239		1342.39	0.02124983		1872.39	0.01039354		2402.38	0.00417992		2932.38	0.00068842		3462.37	0.00984247		3992.37	0.00750566
282.6	-0.00859665		812.59	0.00775961		1342.59	0.02122823		1872.59	0.01081862		2402.58	0.00374173		2932.58	0.00039622		3462.57	0.01056246		3992.57	0.00743356
282.8	-0.00868628		812.79	0.00806575		1342.79	0.02092023		1872.79	0.01111889		2402.78	0.00456018		2932.78	0.00013042		3462.77	0.01008254		3992.77	0.00776973
283	-0.00912861		812.99	0.00776094		1342.99	0.02070026		1872.99	0.01155996		2402.98	0.00454121		2932.98	0.00053972		3462.97	0.01029613		3992.97	0.00745043
283.2	-0.00878593		813.19	0.00772153		1343.19	0.0212185		1873.19	0.01172142		2403.18	0.0056693		2933.18	0.00068259		3463.17	0.01063944		3993.17	0.00772469
283.4	-0.00846394		813.39	0.0082724		1343.39	0.02004018		1873.39	0.01189143		2403.38	0.00663582		2933.38	0.00072607		3463.37	0.01006153		3993.37	0.00869971
283.6	-0.00781988		813.59	0.00829497		1343.59	0.01861405		1873.59	0.01264187		2403.58	0.00721171		2933.58	0.00027824		3463.57	0.01011777		3993.57	0.0087721
283.8	-0.00756113		813.79	0.00885758		1343.79	0.01764063		1873.79	0.01236132		2403.78	0.00776175		2933.78	0.00060645		3463.77	0.00924321		3993.77	0.00910353
284	-0.00729191		813.99	0.00809057		1343.99	0.0174092		1873.99	0.0138579		2403.98	0.00798025		2933.98	-0.00024409		3463.97	0.0089079		3993.97	0.00889675
284.2	-0.00763606		814.19	0.00782234		1344.19	0.0183568		1874.19	0.01449283		2404.18	0.00780988		2934.18	-0.00063857		3464.17	0.00938205		3994.17	0.00905232
284.4	-0.00825385		814.39	0.00784515		1344.39	0.01803538		1874.39	0.01484651		2404.38	0.00733995		2934.38	-0.00050914		3464.37	0.00946593		3994.37	0.01003596
284.6	-0.0086337		814.59	0.00780138		1344.59	0.01793988		1874.59	0.01504548		2404.58	0.00724798		2934.58	0.00002052		3464.57	0.00924103		3994.57	0.01020313
284.8	-0.00868574		814.79	0.00728185		1344.79	0.01811161		1874.79	0.01481465		2404.78	0.00661319		2934.78	0.00056323		3464.77	0.00965483		3994.77	0.01001012
285	-0.00905178		814.99	0.00660814		1344.99	0.01781416		1874.99	0.01529509		2404.98	0.00581835		2934.98	0.00090832		3464.97	0.00948906		3994.97	0.00996113
285.2	-0.00979609		815.19	0.00681334		1345.19	0.01776073		1875.19	0.01516271		2405.18	0.00473954		2935.18	0.00104245		3465.17	0.01005185		3995.17	0.00974388
285.4	-0.00963383		815.39	0.00727204		1345.39	0.01764725		1875.39	0.01429153		2405.38	0.00444714		2935.38	0.00050748		3465.37	0.01042422		3995.37	0.00896302
285.6	-0.00975047		815.59	0.00704034		1345.59	0.01905711		1875.59	0.01423344		2405.58	0.00437842		2935.58	-0.00027393		3465.57	0.00968599		3995.57	0.00835844
285.8	-0.0102895		815.79	0.00691338		1345.79	0.018923		1875.79	0.01353171		2405.78	0.00559394		2935.78	0.00073472		3465.77	0.00987658		3995.77	0.0074846
286	-0.01016435		815.99	0.00644792		1345.99	0.01903487		1875.99	0.0140167		2405.98	0.00458666		2935.98	0.00149763		3465.97	0.00985663		3995.97	0.00716905
286.2	-0.01060224		816.19	0.00600934		1346.19	0.0196992		1876.19	0.0137438		2406.18	0.00369274		2936.18	0.00157843		3466.17	0.0095844		3996.17	0.00674646
286.4	-0.01061629		816.39	0.00576187		1346.39	0.02111023		1876.39	0.01363893		2406.38	0.00355684		2936.38	0.00169123		3466.37	0.00930532		3996.37	0.0066335
286.6	-0.01053113		816.59	0.00470411		1346.59	0.02150731		1876.59	0.01416113		2406.58	0.00305174		2936.58	0.00159153		3466.57	0.00849102		3996.57	0.00731029
286.8	-0.01008158		816.79	0.00497303		1346.79	0.02148444		1876.79	0.01454473		2406.78	0.00515156		2936.78	0.00170392		3466.77	0.008015		3996.77	0.00725246
287	-0.01024774		816.99	0.00532553		1346.99	0.02187722		1876.99	0.01388503		2406.98	0.00577564		2936.98	0.00139118		3466.97	0.00866148		3996.97	0.00660801
287.2	-0.00899194		817.19	0.00536767		1347.19	0.02226097		1877.19	0.01297756		2407.18	0.00651171		2937.18	-0.00017615		3467.17	0.00897013		3997.17	0.00679394
287.4	-0.0087817		817.39	0.00610008		1347.39	0.02140326		1877.39	0.01369349		2407.38	0.00644201		2937.38	-0.00076446		3467.37	0.00946516		3997.37	0.00650396
287.6	-0.00848169		817.59	0.00488546		1347.59	0.02052015		1877.59	0.01409944		2407.58	0.00678836		2937.58	-0.00145326		3467.57	0.00974369		3997.57	0.00665617
287.8	-0.0079026		817.79	0.00465352		1347.79	0.02067377		1877.79	0.01400197		2407.78	0.006888		2937.78	-0.00199926		3467.77	0.00989158		3997.77	0.00649848
288	-0.00746302		817.99	0.00399715		1347.99	0.02192535		1877.99	0.01500992		2407.98	0.00738332		2937.98	-0.00260627		3467.97	0.01027903		3997.97	0.00644897
288.2	-0.00785448		818.19	0.00418541		1348.19	0.02284032		1878.19	0.01537467		2408.18	0.00713082		2938.18	-0.00266629		3468.17	0.01147133		3998.17	0.00651239
288.4	-0.00800452		818.39	0.00475522		1348.39	0.02214274		1878.39	0.01577981		2408.38	0.00684894		2938.38	-0.00239612		3468.37	0.01182327		3998.37	0.00646246
288.6	-0.00701463		818.59	0.00455794		1348.59	0.02272736		1878.59	0.01541065		2408.58	0.00630966		2938.58	-0.0019233		3468.57	0.01174048		3998.57	0.00528787
288.8	-0.00687599		818.79	0.0047577		1348.79	0.02159325		1878.79	0.01583725		2408.78	0.00578575		2938.78	-0.001696		3468.77	0.01235056		3998.77	0.00589035
289	-0.00691666		818.99	0.00491166		1348.99	0.02141446		1878.99	0.01551483		2408.98	0.00474722		2938.98	-0.00186546		3468.97	0.01246198		3998.97	0.00633462
289.2	-0.00635859		819.19	0.00650544		1349.19	0.02162171		1879.19	0.01482639		2409.18	0.00430225		2939.18	-0.00122008		3469.17	0.01302291		3999.17	0.00626477
289.4	-0.00578131		819.39	0.00715714		1349.39	0.02156686		1879.39	0.01374376		2409.38	0.00495396		2939.38	-0.00079745		3469.37	0.01185929		3999.37	0.00568762
289.6	-0.00542098		819.59	0.00717517		1349.59	0.02112991		1879.59	0.01390114		2409.58	0.0048788		2939.58	-0.00041751		3469.57	0.01202991		3999.57	0.00623829
289.8	-0.00549355		819.79	0.00757656		1349.79	0.02037576		1879.79	0.01433759		2409.78	0.00516354		2939.78	-0.00016362		3469.77	0.01150887		3999.77	0.0068141
290	-0.00607631		819.99	0.00821144		1349.99	0.02025695		1879.99	0.01434438		2409.98	0.00520285		2939.98	-0.00014898		3469.97	0.01032034		3999.97	0.00782052
290.2	-0.00678932		820.19	0.00809483		1350.19	0.01982718		1880.19	0.01400813		2410.18	0.00561158		2940.18	-0.00054939		3470.17	0.00889797		4000.17	0.00855897
290.4	-0.00751435		820.39	0.00808744		1350.39	0.01998139		1880.39	0.01380182		2410.38	0.00549515		2940.38	-0.00034177		3470.37	0.00755291		4000.37	0.01014584
290.6	-0.00848121		820.59	0.00881217		1350.59	0.01984391		1880.59	0.01385172		2410.58	0.00528901		2940.58	-0.00047001		3470.57	0.00645831		4000.57	0.01059202
290.8	-0.00925793		820.79	0.00952339		1350.79	0.01950586		1880.79	0.01425591		2410.78	0.00604304		2940.78	-0.00005273		3470.77	0.00718959		4000.77	0.0102762
291	-0.01059846		820.99	0.01004659		1350.99	0.01997024		1880.99	0.01356992		2410.98	0.00483878		2940.98	-0.0003768		3470.97	0.00737557		4000.97	0.01036216
291.2	-0.01113796		821.19	0.00954241		1351.19	0.02037237		1881.19	0.01297094		2411.18	0.0042334		2941.18	-0.00090403		3471.17	0.00773341		4001.17	0.01074836
291.4	-0.01202445		821.39	0.00864935		1351.39	0.02005453		1881.39	0.0132278		2411.38	0.00378021		2941.38	-0.00054791		3471.37	0.00837941		4001.37	0.01050851
291.6	-0.0112377		821.59	0.00760509		1351.59	0.01934446		1881.59	0.01246352		2411.58	0.00406486		2941.58	-0.0008156		3471.57	0.00879797		4001.57	0.01098377
291.8	-0.01139901		821.79	0.007712		1351.79	0.02019056		1881.79	0.01295245		2411.78	0.00389103		2941.78	-0.00059582		3471.77	0.00958085		4001.77	0.01061982
292	-0.01189627		821.99	0.00802646		1351.99	0.02121342		1881.99	0.01361729		2411.98	0.00399703		2941.98	0.00027135		3471.97	0.00941002		4001.97	0.01084202
292.2	-0.01130965		822.19	0.00789051		1352.19	0.02151666		1882.19	0.01409836		2412.18	0.00392822		2942.18	0.00007361		3472.17	0.0100442		4002.17	0.01087903
292.4	-0.01094426		822.39	0.00765775		1352.39	0.02189087		1882.39	0.01430005		2412.38	0.00470745		2942.38	0.00032955		3472.37	0.01051226		4002.37	0.0108667
292.6	-0.0098659		822.59	0.00619772		1352.59	0.02303492		1882.59	0.01389874		2412.58	0.00498046		2942.58	0.00042319		3472.57	0.01118786		4002.57	0.01107421
292.8	-0.00958892		822.79	0.00530368		1352.79	0.02255509		1882.79	0.01452239		2412.78	0.00500931		2942.78	0.00074709		3472.77	0.01179943		4002.77	0.01119312
293	-0.00914736		822.99	0.00474467		1352.99	0.02343125		1882.99	0.01383323		2412.98	0.00467829		2942.98	0.00057565		3472.97	0.01265157		4002.97	0.01121886
293.2	-0.00812761		823.19	0.00458148		1353.19	0.02328688		1883.19	0.01383484		2413.18	0.00554124		2943.18	0.00093453		3473.17	0.01227004		4003.17	0.01108405
293.4	-0.00766435		823.39	0.00490334		1353.39	0.02318554		1883.39	0.0138764		2413.38	0.00614518		2943.38	0.00143246		3473.37	0.01151633		4003.37	0.01079478
293.6	-0.00743162		823.59	0.00407492		1353.59	0.0216778		1883.59	0.01382814		2413.58	0.00691882		2943.58	0.00106108		3473.57	0.01181472		4003.57	0.01116728
293.8	-0.00817867		823.79	0.00355886		1353.79	0.02167698		1883.79	0.01350945		2413.78	0.00831961		2943.78	0.00095773		3473.77	0.01148908		4003.77	0.010952
294	-0.00854397		823.99	0.00362408		1353.99	0.02124749		1883.99	0.01335366		2413.98	0.008974		2943.98	0.00089836		3473.97	0.01116927		4003.97	0.01081383
294.2	-0.0090704		824.19	0.00309053		1354.19	0.02081201		1884.19	0.01301541		2414.18	0.00886265		2944.18	0.00103097		3474.17	0.01113895		4004.17	0.01105057
294.4	-0.0098269		824.39	0.00389805		1354.39	0.02067785		1884.39	0.01383922		2414.38	0.00812617		2944.38	0.00110638		3474.37	0.01098528		4004.37	0.01068254
294.6	-0.01028282		824.59	0.00426387		1354.59	0.02042502		1884.59	0.01505787		2414.58	0.00767184		2944.58	0.00163261		3474.57	0.01061735		4004.57	0.01085045
294.8	-0.01084652		824.79	0.00398409		1354.79	0.01902087		1884.79	0.01520478		2414.78	0.00660882		2944.78	0.00201192		3474.77	0.01108133		4004.77	0.01041497
295	-0.01077288		824.99	0.00453822		1354.99	0.01875154		1884.99	0.01563364		2414.98	0.00564932		2944.98	0.0020518		3474.97	0.01041864		4004.97	0.0097054
295.2	-0.01073663		825.19	0.00524435		1355.19	0.01917425		1885.19	0.01534059		2415.18	0.0058734		2945.18	0.00176191		3475.17	0.01151804		4005.17	0.0083595
295.4	-0.0107115		825.39	0.00587712		1355.39	0.01914593		1885.39	0.01538206		2415.38	0.00607877		2945.38	0.00164391		3475.37	0.01191825		4005.37	0.00797303
295.6	-0.00990014		825.59	0.00623279		1355.59	0.01902352		1885.59	0.01646769		2415.58	0.0060882		2945.58	0.00183509		3475.57	0.01190856		4005.57	0.00777631
295.8	-0.01023401		825.79	0.0066349		1355.79	0.01975118		1885.79	0.0176946		2415.78	0.00623456		2945.78	0.00267753		3475.77	0.01165443		4005.77	0.00772589
296	-0.00987463		825.99	0.00717889		1355.99	0.020109		1885.99	0.01837596		2415.98	0.00730908		2945.98	0.00252054		3475.97	0.01155595		4005.97	0.00773882
296.2	-0.00935875		826.19	0.00770701		1356.19	0.02006182		1886.19	0.01926106		2416.18	0.00772216		2946.18	0.00209051		3476.17	0.01208085		4006.17	0.00768995
296.4	-0.00877223		826.39	0.00744098		1356.39	0.02062673		1886.39	0.0197019		2416.38	0.00799526		2946.38	0.00237716		3476.37	0.01243235		4006.37	0.00762208
296.6	-0.0081046		826.59	0.007477		1356.59	0.02133054		1886.59	0.01966926		2416.58	0.00784453		2946.58	0.00236184		3476.57	0.01237664		4006.57	0.00745779
296.8	-0.00749469		826.79	0.00793325		1356.79	0.02101632		1886.79	0.02019419		2416.78	0.00716072		2946.78	0.0024719		3476.77	0.012292		4006.77	0.00697553
297	-0.00642028		826.99	0.00852142		1356.99	0.02174528		1886.99	0.01914053		2416.98	0.00782758		2946.98	0.00081721		3476.97	0.01267693		4006.97	0.00729505
297.2	-0.00590528		827.19	0.00876235		1357.19	0.02119019		1887.19	0.01891979		2417.18	0.00824537		2947.18	0.00027596		3477.17	0.01199997		4007.17	0.00719818
297.4	-0.00577104		827.39	0.00896085		1357.39	0.02142051		1887.39	0.0179504		2417.38	0.00881245		2947.38	-0.00027602		3477.37	0.01134414		4007.37	0.00844131
297.6	-0.0059415		827.59	0.00748632		1357.59	0.02144767		1887.59	0.01745779		2417.58	0.00953387		2947.58	-0.00160262		3477.57	0.0112939		4007.57	0.00833739
297.8	-0.00679705		827.79	0.00774344		1357.79	0.02306761		1887.79	0.01717924		2417.78	0.00989921		2947.78	-0.00252326		3477.77	0.01111017		4007.77	0.00878428
298	-0.00650193		827.99	0.00750708		1357.99	0.02322525		1887.99	0.01702316		2417.98	0.00960826		2947.98	-0.00315985		3477.97	0.01105653		4007.97	0.0091207
298.2	-0.00747709		828.19	0.00634768		1358.19	0.02331171		1888.19	0.0162285		2418.18	0.00866845		2948.18	-0.00337844		3478.17	0.01125258		4008.17	0.00952494
298.4	-0.00808321		828.39	0.00696499		1358.39	0.02292182		1888.39	0.01671776		2418.38	0.00785534		2948.38	-0.00386853		3478.37	0.01093027		4008.37	0.01092663
298.6	-0.00851873		828.59	0.00690349		1358.59	0.02299457		1888.59	0.01609417		2418.58	0.00694117		2948.58	-0.0047266		3478.57	0.01006428		4008.57	0.01207717
298.8	-0.00947129		828.79	0.0069235		1358.79	0.02276631		1888.79	0.01529071		2418.78	0.00599545		2948.78	-0.0051754		3478.77	0.00975331		4008.77	0.01127678
299	-0.00870215		828.99	0.00760123		1358.99	0.02369325		1888.99	0.01559675		2418.98	0.00616248		2948.98	-0.00562676		3478.97	0.00977185		4008.97	0.01116283
299.2	-0.00972656		829.19	0.00734755		1359.19	0.02352357		1889.19	0.01420538		2419.18	0.00701884		2949.18	-0.0053257		3479.17	0.00994409		4009.17	0.01064208
299.4	-0.01046359		829.39	0.00637806		1359.39	0.02251699		1889.39	0.01449732		2419.38	0.00715306		2949.38	-0.00492346		3479.37	0.00963196		4009.37	0.01052704
299.6	-0.01086498		829.59	0.00551931		1359.59	0.02201055		1889.59	0.01445728		2419.58	0.00698532		2949.58	-0.00443025		3479.57	0.00932034		4009.57	0.01014302
299.8	-0.01108275		829.79	0.00474671		1359.79	0.02200054		1889.79	0.01387881		2419.78	0.00640518		2949.78	-0.0036405		3479.77	0.00910338		4009.77	0.01035631
300	-0.01096491		829.99	0.0043011		1359.99	0.02134088		1889.99	0.01393773		2419.98	0.00728525		2949.98	-0.00328419		3479.97	0.00892109		4009.97	0.01016233
300.2	-0.01062443		830.19	0.00438088		1360.19	0.02145769		1890.19	0.01321136		2420.18	0.00670477		2950.18	-0.00156233		3480.17	0.00927971		4010.17	0.01012305
300.4	-0.00931389		830.39	0.00421214		1360.39	0.02230021		1890.39	0.01302087		2420.38	0.00754064		2950.38	0.00020821		3480.37	0.00965038		4010.37	0.00983739
300.6	-0.00832581		830.59	0.00451096		1360.59	0.02303777		1890.59	0.01203385		2420.58	0.00834197		2950.58	0.00075646		3480.57	0.00972182		4010.57	0.00911891
300.8	-0.00714882		830.79	0.00396689		1360.79	0.02314054		1890.79	0.01216022		2420.78	0.00825437		2950.78	0.00114087		3480.77	0.00936173		4010.77	0.00908771
301	-0.00647558		830.99	0.00326496		1360.99	0.02302632		1890.99	0.0124759		2420.98	0.00867333		2950.98	0.00018617		3480.97	0.0098793		4010.97	0.009143
301.2	-0.0067541		831.19	0.00314832		1361.19	0.02276392		1891.19	0.01304855		2421.18	0.00849409		2951.18	0.00082892		3481.17	0.00956255		4011.17	0.00897432
301.4	-0.00630736		831.39	0.0026204		1361.39	0.02329679		1891.39	0.01291503		2421.38	0.00889133		2951.38	0.00140115		3481.37	0.00942042		4011.37	0.00956957
301.6	-0.00648827		831.59	0.0028432		1361.59	0.02387655		1891.59	0.01368315		2421.58	0.00807156		2951.58	0.00117305		3481.57	0.00929411		4011.57	0.00959589
301.8	-0.00677505		831.79	0.00348128		1361.79	0.02410058		1891.79	0.01440712		2421.78	0.00855498		2951.78	0.00140962		3481.77	0.00926648		4011.77	0.01088693
302	-0.00653202		831.99	0.00404222		1361.99	0.02347828		1891.99	0.01501295		2421.98	0.00863682		2951.98	0.00132727		3481.97	0.0097726		4011.97	0.0118753
302.2	-0.00669706		832.19	0.00416462		1362.19	0.02327859		1892.19	0.01576944		2422.18	0.00793909		2952.18	0.00128959		3482.17	0.00985793		4012.17	0.01273826
302.4	-0.00648691		832.39	0.00602965		1362.39	0.02301715		1892.39	0.01706979		2422.38	0.00845672		2952.38	0.00008598		3482.37	0.01043635		4012.37	0.01351367
302.6	-0.00708136		832.59	0.00746256		1362.59	0.02300726		1892.59	0.0179672		2422.58	0.0078001		2952.58	-0.00105519		3482.57	0.01044063		4012.57	0.01368847
302.8	-0.00791639		832.79	0.00814389		1362.79	0.02249149		1892.79	0.01892709		2422.78	0.00764224		2952.78	-0.0017495		3482.77	0.01040197		4012.77	0.0140769
303	-0.0081591		832.99	0.0087846		1362.99	0.02158588		1892.99	0.01977014		2422.98	0.00755766		2952.98	-0.00213851		3482.97	0.01041314		4012.97	0.01403833
303.2	-0.00887142		833.19	0.00861713		1363.19	0.01982548		1893.19	0.01983677		2423.18	0.00754173		2953.18	-0.00216732		3483.17	0.0103343		4013.17	0.01390084
303.4	-0.00908979		833.39	0.00869216		1363.39	0.01990512		1893.39	0.02036767		2423.38	0.00700853		2953.38	-0.00336738		3483.37	0.01003647		4013.37	0.01373259
303.6	-0.0094574		833.59	0.00908408		1363.59	0.01978307		1893.59	0.01987035		2423.58	0.0062558		2953.58	-0.00347232		3483.57	0.00984905		4013.57	0.0145075
303.8	-0.00910898		833.79	0.00851145		1363.79	0.0199043		1893.79	0.020117		2423.78	0.0057615		2953.78	-0.00321297		3483.77	0.00970158		4013.77	0.01466305
304	-0.00867381		833.99	0.00826104		1363.99	0.01988356		1893.99	0.0201096		2423.98	0.00705133		2953.98	-0.00296295		3483.97	0.00920481		4013.97	0.01391354
304.2	-0.00831843		834.19	0.00844112		1364.19	0.02092145		1894.19	0.01890821		2424.18	0.0066706		2954.18	-0.00238707		3484.17	0.01014842		4014.17	0.01248171
304.4	-0.00845898		834.39	0.00788682		1364.39	0.0215446		1894.39	0.01894133		2424.38	0.00773446		2954.38	-0.00170071		3484.37	0.01080634		4014.37	0.01187271
304.6	-0.00866653		834.59	0.00636116		1364.59	0.02213027		1894.59	0.01836653		2424.58	0.00691868		2954.58	-0.00191399		3484.57	0.01033477		4014.57	0.01107284
304.8	-0.00854923		834.79	0.0056629		1364.79	0.02123693		1894.79	0.01888826		2424.78	0.0071934		2954.78	-0.00138385		3484.77	0.00974974		4014.77	0.01053421
305	-0.00959021		834.99	0.00522687		1364.99	0.02139732		1894.99	0.01828623		2424.98	0.0074414		2954.98	-0.0010764		3484.97	0.01043646		4014.97	0.00950116
305.2	-0.00999271		835.19	0.00508041		1365.19	0.0218277		1895.19	0.01708992		2425.18	0.00732229		2955.18	-0.00078588		3485.17	0.01056857		4015.17	0.00863954
305.4	-0.00946814		835.39	0.00462026		1365.39	0.02122677		1895.39	0.01655184		2425.38	0.00775071		2955.38	-0.00038168		3485.37	0.01173734		4015.37	0.00927704
305.6	-0.00939612		835.59	0.00496543		1365.59	0.02142284		1895.59	0.01693524		2425.58	0.00827408		2955.58	-0.00048537		3485.57	0.01145985		4015.57	0.01010138
305.8	-0.00929878		835.79	0.00462838		1365.79	0.02093324		1895.79	0.01729478		2425.78	0.00904363		2955.78	-0.00022554		3485.77	0.0113884		4015.77	0.01090155
306	-0.00840719		835.99	0.00487093		1365.99	0.02066945		1895.99	0.01747504		2425.98	0.00909721		2955.98	-0.0000919		3485.97	0.01192034		4015.97	0.0113064
306.2	-0.00882841		836.19	0.00504083		1366.19	0.02091847		1896.19	0.01712912		2426.18	0.00885272		2956.18	0.00050346		3486.17	0.0119607		4016.17	0.01082076
306.4	-0.00971715		836.39	0.00662461		1366.39	0.02107512		1896.39	0.01663023		2426.38	0.00863492		2956.38	-0.00026141		3486.37	0.01287189		4016.37	0.01097738
306.6	-0.01032046		836.59	0.00751984		1366.59	0.0214833		1896.59	0.01672052		2426.58	0.00766678		2956.58	0.00041725		3486.57	0.0131022		4016.57	0.01216769
306.8	-0.01003015		836.79	0.00725805		1366.79	0.02145475		1896.79	0.01579526		2426.78	0.00779192		2956.78	0.00001962		3486.77	0.01347965		4016.77	0.01323027
307	-0.00977604		836.99	0.00775733		1366.99	0.02150304		1896.99	0.01533327		2426.98	0.00719201		2956.98	0.00027262		3486.97	0.01339859		4016.97	0.0132295
307.2	-0.00947039		837.19	0.00811116		1367.19	0.02118372		1897.19	0.01513153		2427.18	0.0073884		2957.18	0.00070185		3487.17	0.01326918		4017.17	0.01425722
307.4	-0.00876347		837.39	0.00814335		1367.39	0.02172241		1897.39	0.01500365		2427.38	0.0071106		2957.38	0.00053014		3487.37	0.01222311		4017.37	0.01488582
307.6	-0.00796723		837.59	0.0091534		1367.59	0.02145707		1897.59	0.01507481		2427.58	0.00663518		2957.58	0.00109187		3487.57	0.01265655		4017.57	0.01445627
307.8	-0.0071142		837.79	0.00796384		1367.79	0.02189966		1897.79	0.0151972		2427.78	0.00614401		2957.78	0.00101035		3487.77	0.01147776		4017.77	0.01390567
308	-0.00727741		837.99	0.00774561		1367.99	0.02202619		1897.99	0.01467288		2427.98	0.00566278		2957.98	0.00134807		3487.97	0.01054213		4017.97	0.01424725
308.2	-0.00806134		838.19	0.00772918		1368.19	0.02210851		1898.19	0.01351426		2428.18	0.00481701		2958.18	0.00140484		3488.17	0.01081882		4018.17	0.01341429
308.4	-0.00886677		838.39	0.00724602		1368.39	0.02240958		1898.39	0.01351434		2428.38	0.00468275		2958.38	0.00190762		3488.37	0.01090776		4018.37	0.01377717
308.6	-0.00801867		838.59	0.00729856		1368.59	0.02216114		1898.59	0.01336692		2428.58	0.00456391		2958.58	0.00213747		3488.57	0.00986533		4018.57	0.01305646
308.8	-0.00833876		838.79	0.00755024		1368.79	0.02135076		1898.79	0.01320831		2428.78	0.0063425		2958.78	0.00260071		3488.77	0.00927646		4018.77	0.01290513
309	-0.00921315		838.99	0.00771629		1368.99	0.02181212		1898.99	0.0131913		2428.98	0.00677176		2958.98	0.00270459		3488.97	0.00972759		4018.97	0.0131266
309.2	-0.00836603		839.19	0.00730313		1369.19	0.02101259		1899.19	0.01253238		2429.18	0.00647514		2959.18	0.0027842		3489.17	0.00964719		4019.17	0.01264397
309.4	-0.00775269		839.39	0.00732493		1369.39	0.02066211		1899.39	0.01397355		2429.38	0.0064144		2959.38	0.00264469		3489.37	0.01044642		4019.37	0.01331144
309.6	-0.00795821		839.59	0.00750415		1369.59	0.02047264		1899.59	0.01551579		2429.58	0.00592643		2959.58	0.0023377		3489.57	0.01008622		4019.57	0.01322965
309.8	-0.00780237		839.79	0.00668896		1369.79	0.02029118		1899.79	0.01540807		2429.78	0.00512954		2959.78	0.00218435		3489.77	0.01045322		4019.77	0.01340186
310	-0.00767285		839.99	0.00701615		1369.99	0.02070912		1899.99	0.01523065		2429.98	0.00534451		2959.98	0.00190796		3489.97	0.01088114		4019.97	0.01342253
310.2	-0.00838607		840.19	0.00702727		1370.19	0.02106373		1900.19	0.01467721		2430.18	0.00497715		2960.18	0.00122996		3490.17	0.0113802		4020.17	0.01330179
310.4	-0.00845761		840.39	0.00716904		1370.39	0.02242278		1900.39	0.01545402		2430.38	0.005281		2960.38	0.00059202		3490.37	0.01135315		4020.37	0.01384376
310.6	-0.00874808		840.59	0.00717411		1370.59	0.02310247		1900.59	0.01640608		2430.58	0.00499706		2960.58	-0.00033502		3490.57	0.01179203		4020.57	0.01445308
310.8	-0.00862935		840.79	0.00682712		1370.79	0.02244995		1900.79	0.01659178		2430.78	0.00566512		2960.78	-0.00115217		3490.77	0.01154301		4020.77	0.01510837
311	-0.00823274		840.99	0.00698172		1370.99	0.02266481		1900.99	0.01781614		2430.98	0.00525691		2960.98	-0.00168822		3490.97	0.01105972		4020.97	0.01444809
311.2	-0.00871805		841.19	0.00667028		1371.19	0.02202396		1901.19	0.01887998		2431.18	0.006324		2961.18	-0.00201321		3491.17	0.01098046		4021.17	0.01542637
311.4	-0.00825146		841.39	0.00663539		1371.39	0.02245398		1901.39	0.01895811		2431.38	0.00581893		2961.38	-0.00284013		3491.37	0.01033041		4021.37	0.01541548
311.6	-0.00795388		841.59	0.00718524		1371.59	0.02260707		1901.59	0.01934281		2431.58	0.0065142		2961.58	-0.00261357		3491.57	0.01087312		4021.57	0.0147343
311.8	-0.00806366		841.79	0.00587004		1371.79	0.02263883		1901.79	0.01862514		2431.78	0.00614736		2961.78	-0.0025112		3491.77	0.01078812		4021.77	0.01454755
312	-0.00838819		841.99	0.00611857		1371.99	0.0232606		1901.99	0.01783359		2431.98	0.00639426		2961.98	-0.00237532		3491.97	0.01076253		4021.97	0.01377992
312.2	-0.00838633		842.19	0.00568147		1372.19	0.02373489		1902.19	0.01728636		2432.18	0.0067407		2962.18	-0.00218583		3492.17	0.01151664		4022.17	0.01161313
312.4	-0.00783577		842.39	0.00623041		1372.39	0.02390255		1902.39	0.01673649		2432.38	0.00787877		2962.38	-0.00144621		3492.37	0.01172205		4022.37	0.01136085
312.6	-0.00738042		842.59	0.00577377		1372.59	0.02282365		1902.59	0.01679072		2432.58	0.0092223		2962.58	0.00035657		3492.57	0.0114002		4022.57	0.01026757
312.8	-0.00840548		842.79	0.00502961		1372.79	0.02301868		1902.79	0.01627446		2432.78	0.00996042		2962.78	0.00073016		3492.77	0.01141901		4022.77	0.01063182
313	-0.00759142		842.99	0.00526239		1372.99	0.02243628		1902.99	0.01649203		2432.98	0.00974219		2962.98	0.00112867		3492.97	0.01194552		4022.97	0.0103579
313.2	-0.00707148		843.19	0.00475628		1373.19	0.02177825		1903.19	0.0160324		2433.18	0.00961796		2963.18	0.00148176		3493.17	0.0123322		4023.17	0.00945609
313.4	-0.00733838		843.39	0.00461402		1373.39	0.02184349		1903.39	0.01711327		2433.38	0.0091953		2963.38	0.0014469		3493.37	0.01360176		4023.37	0.00923184
313.6	-0.00729672		843.59	0.00449602		1373.59	0.02177329		1903.59	0.01701275		2433.58	0.00902534		2963.58	0.00140429		3493.57	0.01375802		4023.57	0.00908069
313.8	-0.00746852		843.79	0.00457937		1373.79	0.02161544		1903.79	0.01592288		2433.78	0.00860015		2963.78	0.00142912		3493.77	0.01414149		4023.77	0.00980631
314	-0.00777065		843.99	0.00464892		1373.99	0.02159437		1903.99	0.01536165		2433.98	0.00890451		2963.98	0.00137935		3493.97	0.01381952		4023.97	0.01071801
314.2	-0.00751071		844.19	0.00479501		1374.19	0.02217678		1904.19	0.01564994		2434.18	0.00881138		2964.18	0.00097388		3494.17	0.01315502		4024.17	0.01179825
314.4	-0.00829398		844.39	0.00520795		1374.39	0.02285425		1904.39	0.01616465		2434.38	0.00896577		2964.38	0.00098284		3494.37	0.01209923		4024.37	0.01285909
314.6	-0.00984086		844.59	0.00611576		1374.59	0.02209147		1904.59	0.01683525		2434.58	0.00784526		2964.58	-0.00003915		3494.57	0.01133005		4024.57	0.01417281
314.8	-0.00940229		844.79	0.00651541		1374.79	0.02214699		1904.79	0.01686472		2434.78	0.00922099		2964.78	-0.00008079		3494.77	0.01091084		4024.77	0.01540433
315	-0.00919869		844.99	0.00643805		1374.99	0.02283127		1904.99	0.01691643		2434.98	0.00848769		2964.98	-0.00093956		3494.97	0.01099572		4024.97	0.01557874
315.2	-0.00938435		845.19	0.00665941		1375.19	0.02287023		1905.19	0.01669983		2435.18	0.00934178		2965.18	-0.00116858		3495.17	0.01117997		4025.17	0.01598145
315.4	-0.00976901		845.39	0.00726595		1375.39	0.02379024		1905.39	0.01621295		2435.38	0.00858853		2965.38	-0.00058829		3495.37	0.01092203		4025.37	0.01617213
315.6	-0.00991593		845.59	0.00673059		1375.59	0.02374264		1905.59	0.01628464		2435.58	0.00897665		2965.58	0.00069552		3495.57	0.01162014		4025.57	0.01563969
315.8	-0.00983368		845.79	0.00623217		1375.79	0.02428691		1905.79	0.01533808		2435.78	0.0086076		2965.78	0.00073497		3495.77	0.0122927		4025.77	0.01526259
316	-0.00919514		845.99	0.00591696		1375.99	0.02478173		1905.99	0.01482104		2435.98	0.00919302		2965.98	0.00080209		3495.97	0.01231412		4025.97	0.01407342
316.2	-0.00923138		846.19	0.00563895		1376.19	0.02438436		1906.19	0.01501319		2436.18	0.00937171		2966.18	0.001188		3496.17	0.01289254		4026.17	0.01350246
316.4	-0.00972726		846.39	0.00612363		1376.39	0.02368478		1906.39	0.01510165		2436.38	0.00936929		2966.38	0.00140557		3496.37	0.0130183		4026.37	0.01355206
316.6	-0.01007117		846.59	0.0051961		1376.59	0.02258023		1906.59	0.01595206		2436.58	0.0089918		2966.58	0.00206283		3496.57	0.01298391		4026.57	0.01358257
316.8	-0.01069871		846.79	0.00493614		1376.79	0.02249984		1906.79	0.0157846		2436.78	0.00886662		2966.78	0.00101738		3496.77	0.01263009		4026.77	0.01399138
317	-0.01046167		846.99	0.00561235		1376.99	0.02163636		1906.99	0.0161351		2436.98	0.0090073		2966.98	0.0012244		3496.97	0.01276713		4026.97	0.01366763
317.2	-0.01099976		847.19	0.00568286		1377.19	0.02159028		1907.19	0.01580647		2437.18	0.00937247		2967.18	0.00128991		3497.17	0.01282199		4027.17	0.01308092
317.4	-0.01138757		847.39	0.00567687		1377.39	0.02154866		1907.39	0.01596582		2437.38	0.00813413		2967.38	0.00173946		3497.37	0.01313367		4027.37	0.01216122
317.6	-0.01166776		847.59	0.00540945		1377.59	0.02168934		1907.59	0.01658377		2437.58	0.00805206		2967.58	0.00185528		3497.57	0.01216042		4027.57	0.01236406
317.8	-0.0126399		847.79	0.00552515		1377.79	0.02144887		1907.79	0.01593947		2437.78	0.00799302		2967.78	0.00148945		3497.77	0.01170859		4027.77	0.01270129
318	-0.01288793		847.99	0.00527407		1377.99	0.02174948		1907.99	0.01524711		2437.98	0.00837966		2967.98	0.00157137		3497.97	0.01102139		4027.97	0.01308079
318.2	-0.01318163		848.19	0.00630202		1378.19	0.02214825		1908.19	0.01502149		2438.18	0.00818523		2968.18	0.00180144		3498.17	0.01035809		4028.17	0.01415216
318.4	-0.01441549		848.39	0.0066358		1378.39	0.02181574		1908.39	0.01471361		2438.38	0.00788478		2968.38	0.00179784		3498.37	0.0105053		4028.37	0.01481751
318.6	-0.01422513		848.59	0.00756135		1378.59	0.02279655		1908.59	0.01586853		2438.58	0.0071214		2968.58	0.00133689		3498.57	0.00967214		4028.57	0.01526771
318.8	-0.01388647		848.79	0.0064587		1378.79	0.02343717		1908.79	0.01520556		2438.78	0.0073016		2968.78	0.00063014		3498.77	0.00972522		4028.77	0.01477259
319	-0.01345929		848.99	0.00629549		1378.99	0.02412161		1908.99	0.01599803		2438.98	0.00583269		2968.98	0.00083501		3498.97	0.01014061		4028.97	0.01351956
319.2	-0.01312374		849.19	0.0066288		1379.19	0.02483771		1909.19	0.01667036		2439.18	0.00645719		2969.18	0.00082962		3499.17	0.01027446		4029.17	0.01297447
319.4	-0.01318744		849.39	0.00700363		1379.39	0.02489369		1909.39	0.01658033		2439.38	0.00665432		2969.38	0.00124191		3499.37	0.01009365		4029.37	0.01403027
319.6	-0.01210133		849.59	0.0072781		1379.59	0.02506293		1909.59	0.01757396		2439.58	0.0069332		2969.58	0.00117526		3499.57	0.01039585		4029.57	0.01359132
319.8	-0.0114052		849.79	0.00822439		1379.79	0.02519511		1909.79	0.0172908		2439.78	0.00627951		2969.78	0.00044689		3499.77	0.01135178		4029.77	0.01353852
320	-0.01064864		849.99	0.00789864		1379.99	0.02504127		1909.99	0.01745605		2439.98	0.00676425		2969.98	-0.00040437		3499.97	0.01147695		4029.97	0.01360955
320.2	-0.01061908		850.19	0.00848107		1380.19	0.0250275		1910.19	0.01874516		2440.18	0.00688237		2970.18	-0.00061893		3500.17	0.01099421		4030.17	0.01433773
320.4	-0.01055104		850.39	0.00851503		1380.39	0.024865		1910.39	0.01870394		2440.38	0.00669295		2970.38	-0.0003726		3500.37	0.01158139		4030.37	0.01526182
320.6	-0.00994177		850.59	0.00855239		1380.59	0.02427959		1910.59	0.01855814		2440.58	0.00764705		2970.58	0.00010329		3500.57	0.01128909		4030.57	0.01542651
320.8	-0.010046		850.79	0.00820104		1380.79	0.02436206		1910.79	0.01791017		2440.78	0.00873765		2970.78	0.00002059		3500.77	0.01114739		4030.77	0.01506227
321	-0.01023908		850.99	0.00893337		1380.99	0.02435698		1910.99	0.01806864		2440.98	0.00966599		2970.98	0.001082		3500.97	0.01210991		4030.97	0.01515094
321.2	-0.01076436		851.19	0.00918713		1381.19	0.0243727		1911.19	0.01806719		2441.18	0.00953859		2971.18	0.00140241		3501.17	0.01175839		4031.17	0.01446838
321.4	-0.01093633		851.39	0.00945709		1381.39	0.0236999		1911.39	0.01751673		2441.38	0.00958626		2971.38	0.00185951		3501.37	0.01142298		4031.37	0.01368948
321.6	-0.01113614		851.59	0.00958831		1381.59	0.02381921		1911.59	0.01760459		2441.58	0.01006683		2971.58	0.00205933		3501.57	0.01097394		4031.57	0.01365701
321.8	-0.01172038		851.79	0.00934669		1381.79	0.02418227		1911.79	0.01630076		2441.78	0.01016141		2971.78	0.00120746		3501.77	0.01090204		4031.77	0.01426085
322	-0.0119222		851.99	0.00919113		1381.99	0.02372569		1911.99	0.01590141		2441.98	0.01063		2971.98	0.0010521		3501.97	0.01117218		4031.97	0.01401588
322.2	-0.01227176		852.19	0.0095782		1382.19	0.02356863		1912.19	0.01610645		2442.18	0.01031905		2972.18	0.0016454		3502.17	0.01159912		4032.17	0.01470061
322.4	-0.01241883		852.39	0.00867877		1382.39	0.02370486		1912.39	0.01660947		2442.38	0.01031634		2972.38	0.00112424		3502.37	0.01215359		4032.37	0.01479369
322.6	-0.01145923		852.59	0.00848206		1382.59	0.02441075		1912.59	0.01770777		2442.58	0.0101562		2972.58	0.00072888		3502.57	0.01119538		4032.57	0.01433631
322.8	-0.01133599		852.79	0.0077616		1382.79	0.02433007		1912.79	0.01748154		2442.78	0.00981401		2972.78	0.00047895		3502.77	0.01138777		4032.77	0.01334179
323	-0.0100439		852.99	0.00837874		1382.99	0.02427701		1912.99	0.01827892		2442.98	0.01039193		2972.98	0.00090172		3502.97	0.01194501		4032.97	0.01309939
323.2	-0.00873946		853.19	0.00873742		1383.19	0.02478534		1913.19	0.01799665		2443.18	0.01118991		2973.18	0.00041075		3503.17	0.01170914		4033.17	0.01366527
323.4	-0.00712002		853.39	0.00888662		1383.39	0.02523966		1913.39	0.01842809		2443.38	0.01138155		2973.38	0.00034321		3503.37	0.01175064		4033.37	0.01396025
323.6	-0.00623786		853.59	0.0088448		1383.59	0.02601294		1913.59	0.01838128		2443.58	0.01013801		2973.58	0.00094831		3503.57	0.01205112		4033.57	0.01392315
323.8	-0.00600505		853.79	0.00854729		1383.79	0.02595232		1913.79	0.01717535		2443.78	0.00993244		2973.78	0.0014102		3503.77	0.01223477		4033.77	0.01461373
324	-0.00557166		853.99	0.00684397		1383.99	0.02678894		1913.99	0.01734381		2443.98	0.01038436		2973.98	0.00215781		3503.97	0.01201358		4033.97	0.01569725
324.2	-0.00521294		854.19	0.0066624		1384.19	0.0263761		1914.19	0.0175006		2444.18	0.01018736		2974.18	0.00332621		3504.17	0.01116452		4034.17	0.01504869
324.4	-0.00537384		854.39	0.00582604		1384.39	0.02658842		1914.39	0.01640119		2444.38	0.00947342		2974.38	0.00387899		3504.37	0.0119088		4034.37	0.01585659
324.6	-0.00505109		854.59	0.00587503		1384.59	0.0262074		1914.59	0.01586782		2444.58	0.01053532		2974.58	0.00396627		3504.57	0.01163509		4034.57	0.0154598
324.8	-0.00577786		854.79	0.00534972		1384.79	0.02641323		1914.79	0.0154127		2444.78	0.01036563		2974.78	0.00462806		3504.77	0.0112084		4034.77	0.01552713
325	-0.00639708		854.99	0.00594599		1384.99	0.02693926		1914.99	0.01535521		2444.98	0.01035921		2974.98	0.00524187		3504.97	0.01119574		4034.97	0.01521289
325.2	-0.00657286		855.19	0.00596823		1385.19	0.02686388		1915.19	0.01561068		2445.18	0.00958883		2975.18	0.00463563		3505.17	0.01065889		4035.17	0.01537713
325.4	-0.007987		855.39	0.00584625		1385.39	0.02643906		1915.39	0.01509894		2445.38	0.01035627		2975.38	0.004481		3505.37	0.01067654		4035.37	0.01595744
325.6	-0.00960264		855.59	0.00542308		1385.59	0.02687332		1915.59	0.01585311		2445.58	0.00967774		2975.58	0.00395423		3505.57	0.0110488		4035.57	0.01678637
325.8	-0.01051069		855.79	0.00498301		1385.79	0.02627939		1915.79	0.01549544		2445.78	0.0096845		2975.78	0.00293214		3505.77	0.01110467		4035.77	0.01732054
326	-0.01216063		855.99	0.00618592		1385.99	0.02589201		1915.99	0.01574139		2445.98	0.00938245		2975.98	0.00304547		3505.97	0.01118606		4035.97	0.0172933
326.2	-0.01311447		856.19	0.00615248		1386.19	0.02563427		1916.19	0.01581214		2446.18	0.00849133		2976.18	0.00346628		3506.17	0.01184485		4036.17	0.0179599
326.4	-0.01337936		856.39	0.00564904		1386.39	0.02539804		1916.39	0.01613267		2446.38	0.00868111		2976.38	0.00195699		3506.37	0.01214813		4036.37	0.01743893
326.6	-0.01278395		856.59	0.00637358		1386.59	0.02460199		1916.59	0.01709712		2446.58	0.00835177		2976.58	0.00156717		3506.57	0.01120855		4036.57	0.01753223
326.8	-0.01224566		856.79	0.00627806		1386.79	0.02345929		1916.79	0.0173687		2446.78	0.00815288		2976.78	0.00139876		3506.77	0.01177046		4036.77	0.01756576
327	-0.01214623		856.99	0.00641521		1386.99	0.02323979		1916.99	0.01774611		2446.98	0.0083114		2976.98	0.00093957		3506.97	0.01230589		4036.97	0.01811744
327.2	-0.01213929		857.19	0.00659521		1387.19	0.02304886		1917.19	0.01846573		2447.18	0.00772556		2977.18	0.00086618		3507.17	0.01289199		4037.17	0.01776092
327.4	-0.01138757		857.39	0.00553157		1387.39	0.02276552		1917.39	0.01888586		2447.38	0.00763354		2977.38	0.00102963		3507.37	0.01315946		4037.37	0.01763806
327.6	-0.01077467		857.59	0.00542846		1387.59	0.02261138		1917.59	0.01816524		2447.58	0.0068341		2977.58	0.00129409		3507.57	0.01296248		4037.57	0.01794761
327.8	-0.0099584		857.79	0.00654691		1387.79	0.02200571		1917.79	0.01861963		2447.78	0.00733596		2977.78	0.00103607		3507.77	0.01334743		4037.77	0.0181009
328	-0.00994175		857.99	0.00631835		1387.99	0.0216487		1917.99	0.01904981		2447.98	0.00691467		2977.98	0.00090324		3507.97	0.01337533		4037.97	0.01814289
328.2	-0.00914955		858.19	0.00694343		1388.19	0.02115081		1918.19	0.01831826		2448.18	0.00743171		2978.18	0.00113755		3508.17	0.01277471		4038.17	0.01733078
328.4	-0.00815534		858.39	0.00677944		1388.39	0.02205515		1918.39	0.01778986		2448.38	0.00796472		2978.38	0.00088974		3508.37	0.01289371		4038.37	0.01819911
328.6	-0.00809559		858.59	0.00731956		1388.59	0.02303576		1918.59	0.01733781		2448.58	0.00959358		2978.58	0.00114286		3508.57	0.01260968		4038.57	0.01794151
328.8	-0.00806589		858.79	0.00629392		1388.79	0.0242105		1918.79	0.01687575		2448.78	0.01013433		2978.78	0.00184272		3508.77	0.01322106		4038.77	0.01748408
329	-0.00761969		858.99	0.00614845		1388.99	0.02446651		1918.99	0.01774394		2448.98	0.0110601		2978.98	0.0023314		3508.97	0.01376504		4038.97	0.01768236
329.2	-0.00770527		859.19	0.00651762		1389.19	0.02423625		1919.19	0.0182889		2449.18	0.0119183		2979.18	0.00283171		3509.17	0.01412829		4039.17	0.01872767
329.4	-0.00955863		859.39	0.00676393		1389.39	0.0246077		1919.39	0.01857641		2449.38	0.01215869		2979.38	0.00376906		3509.37	0.01437275		4039.37	0.01894553
329.6	-0.01013292		859.59	0.00670656		1389.59	0.02485976		1919.59	0.01876099		2449.58	0.01223159		2979.58	0.0032831		3509.57	0.0146894		4039.57	0.01789651
329.8	-0.0103714		859.79	0.00758006		1389.79	0.02575475		1919.79	0.01827816		2449.78	0.01197361		2979.78	0.0028583		3509.77	0.01462214		4039.77	0.01743831
330	-0.01068227		859.99	0.00832274		1389.99	0.0263099		1919.99	0.01827559		2449.98	0.0114329		2979.98	0.00310903		3509.97	0.01460791		4039.97	0.01685497
330.2	-0.01119444		860.19	0.00745568		1390.19	0.02576782		1920.19	0.01816834		2450.18	0.01091815		2980.18	0.00261183		3510.17	0.01537683		4040.17	0.01658945
330.4	-0.01189088		860.39	0.00811315		1390.39	0.02609637		1920.39	0.01810105		2450.38	0.01083437		2980.38	0.00241994		3510.37	0.01498943		4040.37	0.01595108
330.6	-0.01206481		860.59	0.00834127		1390.59	0.02568274		1920.59	0.01876016		2450.58	0.01091344		2980.58	0.00307226		3510.57	0.01433048		4040.57	0.01580039
330.8	-0.01238033		860.79	0.00817027		1390.79	0.02510115		1920.79	0.01793672		2450.78	0.0106699		2980.78	0.0028179		3510.77	0.01378785		4040.77	0.01529789
331	-0.01272769		860.99	0.0083049		1390.99	0.02524431		1920.99	0.01779535		2450.98	0.01009871		2980.98	0.00218315		3510.97	0.0133087		4040.97	0.01477648
331.2	-0.01225182		861.19	0.00749255		1391.19	0.02482617		1921.19	0.01754764		2451.18	0.0095783		2981.18	0.00231701		3511.17	0.01293238		4041.17	0.01395384
331.4	-0.0111468		861.39	0.00676649		1391.39	0.0245527		1921.39	0.01715572		2451.38	0.00886137		2981.38	0.00172343		3511.37	0.0123035		4041.37	0.01369175
331.6	-0.01046672		861.59	0.00777151		1391.59	0.02529096		1921.59	0.0170529		2451.58	0.00881927		2981.58	0.00079684		3511.57	0.01194937		4041.57	0.01392775
331.8	-0.00981615		861.79	0.00870897		1391.79	0.0251618		1921.79	0.01654616		2451.78	0.0085841		2981.78	0.00045243		3511.77	0.01239839		4041.77	0.01458388
332	-0.01010419		861.99	0.00804177		1391.99	0.02524977		1921.99	0.01521541		2451.98	0.00881296		2981.98	0.0005132		3511.97	0.01204596		4041.97	0.01486248
332.2	-0.00939768		862.19	0.00753357		1392.19	0.02585772		1922.19	0.01445031		2452.18	0.00939892		2982.18	0.00059816		3512.17	0.01195057		4042.17	0.01502914
332.4	-0.00977027		862.39	0.00665044		1392.39	0.02663795		1922.39	0.01425809		2452.38	0.00969076		2982.38	0.00063204		3512.37	0.01191647		4042.37	0.01547343
332.6	-0.01004572		862.59	0.00697368		1392.59	0.02676955		1922.59	0.01382132		2452.58	0.00958227		2982.58	0.00065108		3512.57	0.01186289		4042.57	0.01504407
332.8	-0.00939114		862.79	0.00612588		1392.79	0.02668193		1922.79	0.01394398		2452.78	0.00933628		2982.78	0.00068916		3512.77	0.01194035		4042.77	0.01510499
333	-0.00941888		862.99	0.00634568		1392.99	0.0262023		1922.99	0.01499095		2452.98	0.00969519		2982.98	0.00154343		3512.97	0.01153007		4042.97	0.01517
333.2	-0.00923153		863.19	0.00672165		1393.19	0.02601396		1923.19	0.01493552		2453.18	0.00946489		2983.18	0.00160117		3513.17	0.01016442		4043.17	0.01585539
333.4	-0.01012632		863.39	0.0074981		1393.39	0.02570725		1923.39	0.01547026		2453.38	0.00919187		2983.38	0.00086847		3513.37	0.01077072		4043.37	0.01522729
333.6	-0.01003973		863.59	0.00786998		1393.59	0.02529776		1923.59	0.01487331		2453.58	0.00912162		2983.58	-0.00025582		3513.57	0.01123784		4043.57	0.01474022
333.8	-0.01036429		863.79	0.00948479		1393.79	0.02615922		1923.79	0.01523213		2453.78	0.00888649		2983.78	0.00012739		3513.77	0.01114419		4043.77	0.01535361
334	-0.01053681		863.99	0.00910574		1393.99	0.02590671		1923.99	0.01543732		2453.98	0.00855901		2983.98	0.00075459		3513.97	0.01174683		4043.97	0.01616925
334.2	-0.01163595		864.19	0.00935342		1394.19	0.02582007		1924.19	0.01593826		2454.18	0.00867064		2984.18	0.00107462		3514.17	0.012291		4044.17	0.01677838
334.4	-0.0118214		864.39	0.00941293		1394.39	0.02691162		1924.39	0.01655967		2454.38	0.00954752		2984.38	0.00201285		3514.37	0.01182989		4044.37	0.01673489
334.6	-0.01128806		864.59	0.00863827		1394.59	0.02638807		1924.59	0.01640094		2454.58	0.00996144		2984.58	0.00239937		3514.57	0.01209202		4044.57	0.01751233
334.8	-0.01148736		864.79	0.00833317		1394.79	0.02619896		1924.79	0.01642431		2454.78	0.00970452		2984.78	0.00197072		3514.77	0.01204087		4044.77	0.01791452
335	-0.01098808		864.99	0.00743251		1394.99	0.02637671		1924.99	0.0172242		2454.98	0.00922483		2984.98	0.00187678		3514.97	0.01236403		4044.97	0.0182133
335.2	-0.01068465		865.19	0.00660204		1395.19	0.02689824		1925.19	0.0168791		2455.18	0.00836984		2985.18	0.00187049		3515.17	0.01310276		4045.17	0.01786152
335.4	-0.00998988		865.39	0.00715413		1395.39	0.02693823		1925.39	0.01767847		2455.38	0.00784186		2985.38	0.00172208		3515.37	0.01389171		4045.37	0.01744429
335.6	-0.00976257		865.59	0.00738318		1395.59	0.02758287		1925.59	0.01731798		2455.58	0.00800921		2985.58	0.00181393		3515.57	0.01364961		4045.57	0.01723802
335.8	-0.00944119		865.79	0.00727524		1395.79	0.02790579		1925.79	0.01705967		2455.78	0.00679425		2985.78	0.0019438		3515.77	0.01432849		4045.77	0.01688633
336	-0.00911382		865.99	0.00685606		1395.99	0.02775482		1925.99	0.01680493		2455.98	0.00765164		2985.98	0.0017533		3515.97	0.01406544		4045.97	0.0169049
336.2	-0.00977199		866.19	0.00664412		1396.19	0.02781381		1926.19	0.01759812		2456.18	0.0071203		2986.18	0.00132798		3516.17	0.01406533		4046.17	0.01550139
336.4	-0.00962337		866.39	0.00691395		1396.39	0.02758739		1926.39	0.01790698		2456.38	0.00644044		2986.38	0.00155755		3516.37	0.01360887		4046.37	0.01561243
336.6	-0.00926919		866.59	0.00720002		1396.59	0.02725579		1926.59	0.01812126		2456.58	0.00592028		2986.58	0.00119306		3516.57	0.01333079		4046.57	0.01569409
336.8	-0.00920448		866.79	0.00703203		1396.79	0.02734514		1926.79	0.01831057		2456.78	0.00659213		2986.78	0.00127114		3516.77	0.01293013		4046.77	0.01543288
337	-0.00920597		866.99	0.00668152		1396.99	0.0261612		1926.99	0.01803158		2456.98	0.0063007		2986.98	0.00081698		3516.97	0.01328104		4046.97	0.01522351
337.2	-0.00890294		867.19	0.00701885		1397.19	0.02584511		1927.19	0.01793605		2457.18	0.00627445		2987.18	0.000588		3517.17	0.01216334		4047.17	0.01505284
337.4	-0.00936254		867.39	0.00781529		1397.39	0.02541503		1927.39	0.01784117		2457.38	0.00661347		2987.38	0.00056848		3517.37	0.0126385		4047.37	0.01448285
337.6	-0.00989345		867.59	0.00708828		1397.59	0.02643276		1927.59	0.01808814		2457.58	0.00692873		2987.58	0.00060295		3517.57	0.01199421		4047.57	0.01507608
337.8	-0.01124149		867.79	0.00710476		1397.79	0.0274692		1927.79	0.01843177		2457.78	0.0084596		2987.78	0.00097078		3517.77	0.0118281		4047.77	0.01593949
338	-0.01177451		867.99	0.00618913		1397.99	0.02764055		1927.99	0.01800459		2457.98	0.00926424		2987.98	0.00140962		3517.97	0.01198029		4047.97	0.01706038
338.2	-0.01221489		868.19	0.00649069		1398.19	0.02676453		1928.19	0.01796059		2458.18	0.0101178		2988.18	0.00192533		3518.17	0.01255515		4048.17	0.01782168
338.4	-0.01333703		868.39	0.00613832		1398.39	0.02760484		1928.39	0.01887201		2458.38	0.01083436		2988.38	0.00271648		3518.37	0.01244561		4048.37	0.0188514
338.6	-0.01341283		868.59	0.00610442		1398.59	0.02731599		1928.59	0.01838469		2458.58	0.01151935		2988.58	0.00331507		3518.57	0.01321014		4048.57	0.01966353
338.8	-0.01283988		868.79	0.00574955		1398.79	0.02726781		1928.79	0.01854269		2458.78	0.01173471		2988.78	0.00301761		3518.77	0.01316751		4048.77	0.01987121
339	-0.01289787		868.99	0.00636027		1398.99	0.02729859		1928.99	0.01858937		2458.98	0.01158931		2988.98	0.00347134		3518.97	0.01332618		4048.97	0.01981569
339.2	-0.01267232		869.19	0.007756		1399.19	0.02734789		1929.19	0.01823091		2459.18	0.01137968		2989.18	0.00331291		3519.17	0.01361451		4049.17	0.01863024
339.4	-0.01252562		869.39	0.00813978		1399.39	0.02708833		1929.39	0.01840355		2459.38	0.0119862		2989.38	0.00403352		3519.37	0.01350322		4049.37	0.01775333
339.6	-0.01211821		869.59	0.00837741		1399.59	0.02747411		1929.59	0.01790923		2459.58	0.01213227		2989.58	0.00406061		3519.57	0.0132474		4049.57	0.01768932
339.8	-0.01169689		869.79	0.00864854		1399.79	0.02798921		1929.79	0.01808155		2459.78	0.01193907		2989.78	0.00353486		3519.77	0.01374821		4049.77	0.01719268
340	-0.01154738		869.99	0.00895353		1399.99	0.02696559		1929.99	0.01752752		2459.98	0.01165259		2989.98	0.00322044		3519.97	0.013049		4049.97	0.01662011
340.2	-0.01136923		870.19	0.00939094		1400.19	0.02678075		1930.19	0.01752653		2460.18	0.01041507		2990.18	0.00383926		3520.17	0.01335407		4050.17	0.01589416
340.4	-0.01004013		870.39	0.00953007		1400.39	0.02665195		1930.39	0.01788801		2460.38	0.0102277		2990.38	0.00369419		3520.37	0.01327721		4050.37	0.01729288
340.6	-0.00913839		870.59	0.00979909		1400.59	0.02724986		1930.59	0.01702224		2460.58	0.00955497		2990.58	0.00428297		3520.57	0.01412037		4050.57	0.01680215
340.8	-0.0083429		870.79	0.00981773		1400.79	0.0274051		1930.79	0.01627932		2460.78	0.00948281		2990.78	0.00398548		3520.77	0.01438868		4050.77	0.01613578
341	-0.00750478		870.99	0.00982862		1400.99	0.02626984		1930.99	0.01554762		2460.98	0.0086785		2990.98	0.00347162		3520.97	0.01446674		4050.97	0.0167059
341.2	-0.00722605		871.19	0.0099001		1401.19	0.02743389		1931.19	0.01581721		2461.18	0.00875513		2991.18	0.00385488		3521.17	0.01294039		4051.17	0.01545311
341.4	-0.00793789		871.39	0.00968075		1401.39	0.02781945		1931.39	0.01601178		2461.38	0.00849413		2991.38	0.00380041		3521.37	0.01272759		4051.37	0.01578185
341.6	-0.00872803		871.59	0.00959784		1401.59	0.02784951		1931.59	0.01656468		2461.58	0.00859558		2991.58	0.0038403		3521.57	0.012502		4051.57	0.0154494
341.8	-0.00952973		871.79	0.01037857		1401.79	0.02768087		1931.79	0.01624932		2461.78	0.00827879		2991.78	0.00390263		3521.77	0.01248393		4051.77	0.01529659
342	-0.00925316		871.99	0.01113308		1401.99	0.02745805		1931.99	0.01722529		2461.98	0.00706542		2991.98	0.00425537		3521.97	0.01252424		4051.97	0.01552404
342.2	-0.00945335		872.19	0.01044746		1402.19	0.02644578		1932.19	0.01847615		2462.18	0.00623996		2992.18	0.00445761		3522.17	0.01283964		4052.17	0.0153749
342.4	-0.00925215		872.39	0.00995482		1402.39	0.02663655		1932.39	0.01938186		2462.38	0.00579199		2992.38	0.00422992		3522.37	0.01321448		4052.37	0.01510457
342.6	-0.0081694		872.59	0.01029622		1402.59	0.02674638		1932.59	0.02027236		2462.58	0.00653061		2992.58	0.00413538		3522.57	0.01354852		4052.57	0.01508505
342.8	-0.00815063		872.79	0.00904554		1402.79	0.02654763		1932.79	0.0205411		2462.78	0.00651814		2992.78	0.00455438		3522.77	0.01336912		4052.77	0.01505333
343	-0.00934066		872.99	0.00914281		1402.99	0.02576876		1932.99	0.02122227		2462.98	0.00696552		2992.98	0.00499379		3522.97	0.01389211		4052.97	0.01502819
343.2	-0.00890548		873.19	0.00813178		1403.19	0.02526159		1933.19	0.0218106		2463.18	0.00781452		2993.18	0.00437088		3523.17	0.013802		4053.17	0.0148603
343.4	-0.00905921		873.39	0.00666288		1403.39	0.02471074		1933.39	0.02159404		2463.38	0.00877917		2993.38	0.00491751		3523.37	0.01426895		4053.37	0.01537921
343.6	-0.0088289		873.59	0.00615804		1403.59	0.02457945		1933.59	0.02197948		2463.58	0.00858825		2993.58	0.00481694		3523.57	0.01438425		4053.57	0.01582499
343.8	-0.00939374		873.79	0.00586824		1403.79	0.02474648		1933.79	0.02186821		2463.78	0.00867461		2993.78	0.00526642		3523.77	0.0139349		4053.77	0.01537161
344	-0.01029122		873.99	0.00533902		1403.99	0.02439406		1933.99	0.02103644		2463.98	0.00896955		2993.98	0.00570223		3523.97	0.01301109		4053.97	0.01564823
344.2	-0.01011203		874.19	0.00578063		1404.19	0.02442983		1934.19	0.02126041		2464.18	0.00956571		2994.18	0.00633791		3524.17	0.01299265		4054.17	0.01605729
344.4	-0.01014704		874.39	0.00489711		1404.39	0.02513403		1934.39	0.02121462		2464.38	0.00958035		2994.38	0.00618737		3524.37	0.01327984		4054.37	0.01649802
344.6	-0.01023304		874.59	0.00509828		1404.59	0.02649615		1934.59	0.02017889		2464.58	0.01016276		2994.58	0.00761391		3524.57	0.01376811		4054.57	0.01685139
344.8	-0.01132701		874.79	0.00430459		1404.79	0.02624998		1934.79	0.02013657		2464.78	0.01090535		2994.78	0.00747101		3524.77	0.01308362		4054.77	0.01764697
345	-0.01116298		874.99	0.00421498		1404.99	0.02626767		1934.99	0.01960876		2464.98	0.01091103		2994.98	0.00768435		3524.97	0.01221819		4054.97	0.01743875
345.2	-0.01250263		875.19	0.00382221		1405.19	0.02707017		1935.19	0.01923327		2465.18	0.01079623		2995.18	0.00805979		3525.17	0.01152848		4055.17	0.01619878
345.4	-0.01357516		875.39	0.00389457		1405.39	0.02789333		1935.39	0.0194754		2465.38	0.01099823		2995.38	0.00743933		3525.37	0.01192239		4055.37	0.01688344
345.6	-0.01315208		875.59	0.00402617		1405.59	0.02779553		1935.59	0.01928745		2465.58	0.01019787		2995.58	0.00721017		3525.57	0.01166567		4055.57	0.01622305
345.8	-0.0127696		875.79	0.00479684		1405.79	0.02832534		1935.79	0.01859928		2465.78	0.0095403		2995.78	0.00663811		3525.77	0.01212951		4055.77	0.01588614
346	-0.01206012		875.99	0.00536833		1405.99	0.02817942		1935.99	0.01976595		2465.98	0.00881757		2995.98	0.00582177		3525.97	0.01288282		4055.97	0.01596447
346.2	-0.01132653		876.19	0.005177		1406.19	0.02786178		1936.19	0.01975559		2466.18	0.00813473		2996.18	0.0051872		3526.17	0.0133887		4056.17	0.0161292
346.4	-0.00963546		876.39	0.00602027		1406.39	0.02873342		1936.39	0.0198152		2466.38	0.00816257		2996.38	0.00434121		3526.37	0.01379855		4056.37	0.01648672
346.6	-0.0087047		876.59	0.00711162		1406.59	0.02899702		1936.59	0.02124508		2466.58	0.00843065		2996.58	0.00391735		3526.57	0.01436763		4056.57	0.01671988
346.8	-0.00807591		876.79	0.00716769		1406.79	0.02828558		1936.79	0.02064793		2466.78	0.0088338		2996.78	0.00379563		3526.77	0.01456669		4056.77	0.01683667
347	-0.00738616		876.99	0.00742511		1406.99	0.0274449		1936.99	0.02088942		2466.98	0.00884589		2996.98	0.00320858		3526.97	0.01513975		4056.97	0.01690717
347.2	-0.00542916		877.19	0.00688722		1407.19	0.02799363		1937.19	0.02071908		2467.18	0.00868359		2997.18	0.00217404		3527.17	0.01496158		4057.17	0.01679477
347.4	-0.00546043		877.39	0.0068061		1407.39	0.02821828		1937.39	0.02008854		2467.38	0.00846235		2997.38	0.00191058		3527.37	0.01520429		4057.37	0.01713632
347.6	-0.00486276		877.59	0.00727687		1407.59	0.02932914		1937.59	0.02021245		2467.58	0.00849617		2997.58	0.00136864		3527.57	0.01493347		4057.57	0.01756309
347.8	-0.00561551		877.79	0.00692536		1407.79	0.02999164		1937.79	0.02057571		2467.78	0.00862471		2997.78	0.00134188		3527.77	0.01467497		4057.77	0.01756321
348	-0.0062678		877.99	0.00624406		1407.99	0.03003299		1937.99	0.02029303		2467.98	0.00863666		2997.98	0.00090406		3527.97	0.01433062		4057.97	0.01719745
348.2	-0.00569433		878.19	0.00586508		1408.19	0.02968307		1938.19	0.02079775		2468.18	0.00824551		2998.18	0.00140728		3528.17	0.01395178		4058.17	0.01750872
348.4	-0.00581523		878.39	0.00463241		1408.39	0.03056823		1938.39	0.02111457		2468.38	0.00815274		2998.38	0.00283967		3528.37	0.01405799		4058.37	0.01811575
348.6	-0.00603936		878.59	0.00439341		1408.59	0.03037691		1938.59	0.02110776		2468.58	0.00868039		2998.58	0.00402583		3528.57	0.01390373		4058.57	0.0186186
348.8	-0.00737175		878.79	0.0040299		1408.79	0.02993015		1938.79	0.02055565		2468.78	0.00795057		2998.78	0.00393163		3528.77	0.01372847		4058.77	0.01861711
349	-0.00747724		878.99	0.0051478		1408.99	0.02959106		1938.99	0.01963034		2468.98	0.00794143		2998.98	0.00430823		3528.97	0.01336207		4058.97	0.01847841
349.2	-0.0089704		879.19	0.00495353		1409.19	0.02941674		1939.19	0.01893977		2469.18	0.00815138		2999.18	0.00438653		3529.17	0.01283843		4059.17	0.01820785
349.4	-0.01016632		879.39	0.00432276		1409.39	0.03000225		1939.39	0.01854518		2469.38	0.00858961		2999.38	0.00464522		3529.37	0.01291717		4059.37	0.01858457
349.6	-0.01011327		879.59	0.00465619		1409.59	0.02929795		1939.59	0.01745446		2469.58	0.00895668		2999.58	0.00442958		3529.57	0.01295216		4059.57	0.01816743
349.8	-0.01021613		879.79	0.00593302		1409.79	0.02875171		1939.79	0.01702403		2469.78	0.00962219		2999.78	0.00468567		3529.77	0.013618		4059.77	0.01898516
350	-0.01006019		879.99	0.00682432		1409.99	0.02841833		1939.99	0.01722496		2469.98	0.00948691		2999.98	0.00387621		3529.97	0.01386808		4059.97	0.01969802
350.2	-0.01017285		880.19	0.00726471		1410.19	0.0287667		1940.19	0.01716513		2470.18	0.00937524		3000.18	0.00415229		3530.17	0.01396215		4060.17	0.02102131
350.4	-0.01013386		880.39	0.00767749		1410.39	0.02897104		1940.39	0.01767251		2470.38	0.00991236		3000.38	0.00403177		3530.37	0.01427788		4060.37	0.02131311
350.6	-0.01073258		880.59	0.00827091		1410.59	0.02859527		1940.59	0.01901488		2470.58	0.00955422		3000.58	0.00406023		3530.57	0.01539329		4060.57	0.02104929
350.8	-0.01109319		880.79	0.00794722		1410.79	0.02850229		1940.79	0.01912993		2470.78	0.01001361		3000.78	0.0036128		3530.77	0.01499035		4060.77	0.02092722
351	-0.01114119		880.99	0.00767572		1410.99	0.0285312		1940.99	0.01865964		2470.98	0.00979453		3000.98	0.00387085		3530.97	0.01464446		4060.97	0.02070424
351.2	-0.01087934		881.19	0.00715011		1411.19	0.02938148		1941.19	0.0180447		2471.18	0.00986016		3001.18	0.00313074		3531.17	0.01433552		4061.17	0.0208854
351.4	-0.01164009		881.39	0.00713418		1411.39	0.02948455		1941.39	0.01846729		2471.38	0.01047879		3001.38	0.00339656		3531.37	0.01448397		4061.37	0.02126685
351.6	-0.01184268		881.59	0.00791152		1411.59	0.02954526		1941.59	0.01837036		2471.58	0.00998454		3001.58	0.00289278		3531.57	0.01450836		4061.57	0.02070639
351.8	-0.012304		881.79	0.00773884		1411.79	0.02924334		1941.79	0.01888339		2471.78	0.00917434		3001.78	0.00331044		3531.77	0.01420011		4061.77	0.02025943
352	-0.01183821		881.99	0.00816321		1411.99	0.02856109		1941.99	0.0179425		2471.98	0.00828724		3001.98	0.00330029		3531.97	0.01382993		4061.97	0.01935284
352.2	-0.01077221		882.19	0.00870341		1412.19	0.02801909		1942.19	0.0184205		2472.18	0.0081516		3002.18	0.00409086		3532.17	0.01293362		4062.17	0.01927673
352.4	-0.01104174		882.39	0.00894125		1412.39	0.02798629		1942.39	0.01846391		2472.38	0.00791931		3002.38	0.00454504		3532.37	0.01281637		4062.37	0.0190724
352.6	-0.01100005		882.59	0.00976987		1412.59	0.02838001		1942.59	0.01747504		2472.58	0.00674267		3002.58	0.00465909		3532.57	0.0119335		4062.57	0.01925022
352.8	-0.0112351		882.79	0.01025848		1412.79	0.0286224		1942.79	0.01738589		2472.78	0.00664714		3002.78	0.00456769		3532.77	0.01109073		4062.77	0.0194315
353	-0.01177721		882.99	0.01099775		1412.99	0.0285719		1942.99	0.01725449		2472.98	0.00616269		3002.98	0.00493742		3532.97	0.00987307		4062.97	0.01906431
353.2	-0.01219315		883.19	0.00995233		1413.19	0.02851367		1943.19	0.01693897		2473.18	0.00596059		3003.18	0.00480914		3533.17	0.00932976		4063.17	0.01825252
353.4	-0.01315751		883.39	0.01012765		1413.39	0.02811637		1943.39	0.01671096		2473.38	0.00625444		3003.38	0.00499375		3533.37	0.00969975		4063.37	0.01843409
353.6	-0.01324704		883.59	0.01073988		1413.59	0.02761901		1943.59	0.01675373		2473.58	0.00683761		3003.58	0.00419406		3533.57	0.01014101		4063.57	0.01873586
353.8	-0.01312247		883.79	0.01035344		1413.79	0.02723239		1943.79	0.01762546		2473.78	0.00715778		3003.78	0.00403851		3533.77	0.01078159		4063.77	0.01982612
354	-0.01386453		883.99	0.00946197		1413.99	0.02700753		1943.99	0.01830516		2473.98	0.00777524		3003.98	0.00339918		3533.97	0.01089554		4063.97	0.01985774
354.2	-0.01428678		884.19	0.00796626		1414.19	0.02757244		1944.19	0.01929013		2474.18	0.00815518		3004.18	0.0036935		3534.17	0.0112756		4064.17	0.02085078
354.4	-0.01423093		884.39	0.00745991		1414.39	0.02683339		1944.39	0.02039821		2474.38	0.0083247		3004.38	0.00370254		3534.37	0.01228004		4064.37	0.02108415
354.6	-0.01402073		884.59	0.00677239		1414.59	0.02647286		1944.59	0.02153099		2474.58	0.00867805		3004.58	0.00432184		3534.57	0.01262522		4064.57	0.02126181
354.8	-0.01355056		884.79	0.00658453		1414.79	0.02581683		1944.79	0.02132097		2474.78	0.00967747		3004.78	0.00422065		3534.77	0.01264844		4064.77	0.02203617
355	-0.01281519		884.99	0.00700737		1414.99	0.02566366		1944.99	0.02090449		2474.98	0.00977709		3004.98	0.00445153		3534.97	0.01301244		4064.97	0.02261563
355.2	-0.01229337		885.19	0.00600252		1415.19	0.02518208		1945.19	0.02075596		2475.18	0.00998015		3005.18	0.00403		3535.17	0.01350389		4065.17	0.0221759
355.4	-0.01176894		885.39	0.00604761		1415.39	0.02495778		1945.39	0.02047721		2475.38	0.00956919		3005.38	0.0050123		3535.37	0.01383707		4065.37	0.02132593
355.6	-0.01198202		885.59	0.00657034		1415.59	0.02490856		1945.59	0.01972408		2475.58	0.00824753		3005.58	0.00449724		3535.57	0.01434369		4065.57	0.02100974
355.8	-0.0111515		885.79	0.00684215		1415.79	0.02569104		1945.79	0.020038		2475.78	0.0073813		3005.78	0.00503217		3535.77	0.01416872		4065.77	0.02094874
356	-0.00957143		885.99	0.00650941		1415.99	0.0257615		1945.99	0.01873252		2475.98	0.00654262		3005.98	0.00519672		3535.97	0.01427539		4065.97	0.01994144
356.2	-0.00903811		886.19	0.00694958		1416.19	0.02696457		1946.19	0.0189858		2476.18	0.00709203		3006.18	0.00528354		3536.17	0.01357024		4066.17	0.01945256
356.4	-0.00931184		886.39	0.00691959		1416.39	0.02786791		1946.39	0.0189199		2476.38	0.00690081		3006.38	0.00496376		3536.37	0.01327203		4066.37	0.01957575
356.6	-0.0089454		886.59	0.00788344		1416.59	0.02947807		1946.59	0.01884314		2476.58	0.00623143		3006.58	0.00610305		3536.57	0.01282116		4066.57	0.01972698
356.8	-0.00934355		886.79	0.00784883		1416.79	0.03003074		1946.79	0.01916551		2476.78	0.00687955		3006.78	0.00627458		3536.77	0.0124886		4066.77	0.01894907
357	-0.01057082		886.99	0.00822289		1416.99	0.03108372		1946.99	0.01911103		2476.98	0.0067376		3006.98	0.00617298		3536.97	0.01188326		4066.97	0.01764966
357.2	-0.00997491		887.19	0.00791296		1417.19	0.03066127		1947.19	0.01945753		2477.18	0.00723368		3007.18	0.00614956		3537.17	0.01309487		4067.17	0.01754682
357.4	-0.01126977		887.39	0.00792843		1417.39	0.03096436		1947.39	0.02011214		2477.38	0.00812786		3007.38	0.00644121		3537.37	0.01410713		4067.37	0.01749882
357.6	-0.01221358		887.59	0.00810674		1417.59	0.03080949		1947.59	0.02058448		2477.58	0.00989921		3007.58	0.00621327		3537.57	0.01430878		4067.57	0.01767946
357.8	-0.01242692		887.79	0.00766236		1417.79	0.03071827		1947.79	0.0212824		2477.78	0.01075369		3007.78	0.00600714		3537.77	0.01485933		4067.77	0.01833702
358	-0.01205978		887.99	0.00776351		1417.99	0.0302979		1947.99	0.02167836		2477.98	0.01189587		3007.98	0.0065373		3537.97	0.01446675		4067.97	0.01818661
358.2	-0.01181046		888.19	0.00808345		1418.19	0.02986466		1948.19	0.02150951		2478.18	0.01166603		3008.18	0.0068204		3538.17	0.01490835		4068.17	0.01900311
358.4	-0.01132141		888.39	0.00905507		1418.39	0.02889103		1948.39	0.02165542		2478.38	0.01275607		3008.38	0.00701983		3538.37	0.01502857		4068.37	0.01916738
358.6	-0.01066152		888.59	0.00934927		1418.59	0.02782796		1948.59	0.0217451		2478.58	0.01382525		3008.58	0.00700813		3538.57	0.01461144		4068.57	0.01940201
358.8	-0.00953687		888.79	0.00929573		1418.79	0.02750396		1948.79	0.02111848		2478.78	0.01422432		3008.78	0.00578469		3538.77	0.01439094		4068.77	0.01957018
359	-0.00819486		888.99	0.00838245		1418.99	0.02757434		1948.99	0.02084913		2478.98	0.01379436		3008.98	0.0046653		3538.97	0.01461826		4068.97	0.01850284
359.2	-0.00733448		889.19	0.00753028		1419.19	0.02694059		1949.19	0.02047429		2479.18	0.01337215		3009.18	0.00414867		3539.17	0.01454607		4069.17	0.01729562
359.4	-0.00683024		889.39	0.00769899		1419.39	0.02732423		1949.39	0.02038388		2479.38	0.01266815		3009.38	0.00455135		3539.37	0.01549653		4069.37	0.01758191
359.6	-0.00677336		889.59	0.00776491		1419.59	0.02678557		1949.59	0.01965523		2479.58	0.01173055		3009.58	0.0034647		3539.57	0.01635715		4069.57	0.01888027
359.8	-0.00558474		889.79	0.00804379		1419.79	0.0271451		1949.79	0.019973		2479.78	0.01105125		3009.78	0.00284936		3539.77	0.01583835		4069.77	0.01856462
360	-0.00431904		889.99	0.00834295		1419.99	0.02693359		1949.99	0.01898741		2479.98	0.01092346		3009.98	0.00166096		3539.97	0.01593553		4069.97	0.01823185
360.2	-0.00492223		890.19	0.00899804		1420.19	0.02713857		1950.19	0.01936818		2480.18	0.01139003		3010.18	0.00039001		3540.17	0.01605035		4070.17	0.0191795
360.4	-0.00497078		890.39	0.00929335		1420.39	0.0270036		1950.39	0.01935152		2480.38	0.0105729		3010.38	-0.00007754		3540.37	0.01649578		4070.37	0.02003658
360.6	-0.00556893		890.59	0.00925467		1420.59	0.02747056		1950.59	0.01996171		2480.58	0.0101715		3010.58	0.00047315		3540.57	0.01611362		4070.57	0.02003659
360.8	-0.00614142		890.79	0.00840684		1420.79	0.0279272		1950.79	0.02014963		2480.78	0.01001238		3010.78	0.00069101		3540.77	0.01517313		4070.77	0.01942553
361	-0.00586438		890.99	0.00761783		1420.99	0.0273443		1950.99	0.02106054		2480.98	0.0090122		3010.98	0.0010532		3540.97	0.0153288		4070.97	0.01939112
361.2	-0.00564501		891.19	0.00688077		1421.19	0.02634891		1951.19	0.02145438		2481.18	0.00861613		3011.18	0.00167328		3541.17	0.01630351		4071.17	0.0196304
361.4	-0.00692012		891.39	0.0071037		1421.39	0.02578782		1951.39	0.02237563		2481.38	0.00847104		3011.38	0.00259159		3541.37	0.01603425		4071.37	0.02007081
361.6	-0.0070995		891.59	0.0076588		1421.59	0.02474643		1951.59	0.02183533		2481.58	0.00958761		3011.58	0.00238646		3541.57	0.015361		4071.57	0.02079684
361.8	-0.00715414		891.79	0.00784081		1421.79	0.02473365		1951.79	0.02213451		2481.78	0.00953763		3011.78	0.00375238		3541.77	0.01510439		4071.77	0.02098274
362	-0.00727325		891.99	0.00802573		1421.99	0.02496613		1951.99	0.02167397		2481.98	0.01014871		3011.98	0.00394458		3541.97	0.0143064		4071.97	0.02064598
362.2	-0.00835986		892.19	0.00811938		1422.19	0.02570006		1952.19	0.02072573		2482.18	0.0099346		3012.18	0.00397017		3542.17	0.01413609		4072.17	0.02123542
362.4	-0.00810716		892.39	0.00793271		1422.39	0.02583119		1952.39	0.0200899		2482.38	0.01059193		3012.38	0.00421377		3542.37	0.01311138		4072.37	0.02044507
362.6	-0.00839977		892.59	0.00761979		1422.59	0.02634374		1952.59	0.01972897		2482.58	0.01039867		3012.58	0.0039136		3542.57	0.01330808		4072.57	0.02016067
362.8	-0.00760789		892.79	0.00668974		1422.79	0.02793333		1952.79	0.01829552		2482.78	0.01058705		3012.78	0.00277298		3542.77	0.01341901		4072.77	0.01951233
363	-0.00743836		892.99	0.00622386		1422.99	0.02840529		1952.99	0.01777759		2482.98	0.01045295		3012.98	0.00310214		3542.97	0.01357974		4072.97	0.01830822
363.2	-0.00818586		893.19	0.0057039		1423.19	0.02798449		1953.19	0.01688251		2483.18	0.01016213		3013.18	0.00303543		3543.17	0.01413525		4073.17	0.01903766
363.4	-0.00840981		893.39	0.00553508		1423.39	0.02832482		1953.39	0.01578274		2483.38	0.00990359		3013.38	0.00314019		3543.37	0.01494872		4073.37	0.02073853
363.6	-0.00889552		893.59	0.00550381		1423.59	0.02859201		1953.59	0.01451265		2483.58	0.00914883		3013.58	0.00302196		3543.57	0.01452468		4073.57	0.02118345
363.8	-0.00895945		893.79	0.00563415		1423.79	0.02951886		1953.79	0.01539478		2483.78	0.00890977		3013.78	0.00279296		3543.77	0.01400879		4073.77	0.02100811
364	-0.00920013		893.99	0.00547358		1423.99	0.02954359		1953.99	0.0150483		2483.98	0.00881944		3013.98	0.00190696		3543.97	0.01429861		4073.97	0.02192774
364.2	-0.00981723		894.19	0.0049424		1424.19	0.02896208		1954.19	0.01531466		2484.18	0.00868723		3014.18	0.00199289		3544.17	0.01479236		4074.17	0.02210726
364.4	-0.01064591		894.39	0.0050439		1424.39	0.02893191		1954.39	0.01607971		2484.38	0.00803227		3014.38	0.00313256		3544.37	0.01425957		4074.37	0.02141836
364.6	-0.01130282		894.59	0.0044958		1424.59	0.02909055		1954.59	0.01656382		2484.58	0.00822793		3014.58	0.00383283		3544.57	0.01383964		4074.57	0.02087485
364.8	-0.01077517		894.79	0.00509666		1424.79	0.02883196		1954.79	0.01642214		2484.78	0.00831315		3014.78	0.00480053		3544.77	0.01340736		4074.77	0.02078898
365	-0.01075308		894.99	0.00563975		1424.99	0.02781264		1954.99	0.01741884		2484.98	0.00747164		3014.98	0.00556321		3544.97	0.01346449		4074.97	0.02109484
365.2	-0.01058176		895.19	0.00622179		1425.19	0.02783291		1955.19	0.01778636		2485.18	0.00784101		3015.18	0.00587544		3545.17	0.01291773		4075.17	0.02095163
365.4	-0.01020429		895.39	0.00798191		1425.39	0.02713616		1955.39	0.01834404		2485.38	0.00807851		3015.38	0.00653093		3545.37	0.01292492		4075.37	0.02183992
365.6	-0.0104161		895.59	0.00926946		1425.59	0.02687817		1955.59	0.01782626		2485.58	0.00909283		3015.58	0.00635679		3545.57	0.01175954		4075.57	0.02272009
365.8	-0.01043523		895.79	0.01029207		1425.79	0.02698225		1955.79	0.01809551		2485.78	0.00917869		3015.78	0.00762263		3545.77	0.01185281		4075.77	0.02221948
366	-0.01053125		895.99	0.01022589		1425.99	0.02689626		1955.99	0.01849644		2485.98	0.00928894		3015.98	0.00626215		3545.97	0.01219284		4075.97	0.02239429
366.2	-0.0106518		896.19	0.01058981		1426.19	0.02741728		1956.19	0.01883034		2486.18	0.00908893		3016.18	0.0064529		3546.17	0.01205198		4076.17	0.02211033
366.4	-0.01027186		896.39	0.01026556		1426.39	0.02705859		1956.39	0.01909853		2486.38	0.00911119		3016.38	0.00648948		3546.37	0.0121219		4076.37	0.02151941
366.6	-0.00981146		896.59	0.01047415		1426.59	0.02736668		1956.59	0.01916683		2486.58	0.0087791		3016.58	0.00555147		3546.57	0.01283571		4076.57	0.02145495
366.8	-0.00940828		896.79	0.00982185		1426.79	0.02765333		1956.79	0.01833211		2486.78	0.00884653		3016.78	0.00511954		3546.77	0.01301303		4076.77	0.02132324
367	-0.0091776		896.99	0.00823149		1426.99	0.02669095		1956.99	0.01897587		2486.98	0.00896986		3016.98	0.00481952		3546.97	0.01315309		4076.97	0.02127825
367.2	-0.00907405		897.19	0.00756997		1427.19	0.02639276		1957.19	0.01885255		2487.18	0.00880164		3017.18	0.00364226		3547.17	0.01365756		4077.17	0.02204752
367.4	-0.00777151		897.39	0.00681823		1427.39	0.02650658		1957.39	0.01838747		2487.38	0.00868552		3017.38	0.00414734		3547.37	0.01377964		4077.37	0.02254673
367.6	-0.00806135		897.59	0.00564936		1427.59	0.02688657		1957.59	0.01887731		2487.58	0.00895303		3017.58	0.00417149		3547.57	0.01363384		4077.57	0.02176889
367.8	-0.00830083		897.79	0.00557258		1427.79	0.02703455		1957.79	0.01956878		2487.78	0.01007657		3017.78	0.0036995		3547.77	0.01470283		4077.77	0.02121657
368	-0.00776856		897.99	0.00509447		1427.99	0.02711609		1957.99	0.01985095		2487.98	0.01038346		3017.98	0.00399261		3547.97	0.01534598		4077.97	0.02047757
368.2	-0.00786587		898.19	0.00448664		1428.19	0.02745773		1958.19	0.02048837		2488.18	0.01039793		3018.18	0.00421638		3548.17	0.01609409		4078.17	0.01902292
368.4	-0.00890726		898.39	0.00497457		1428.39	0.0283587		1958.39	0.0203933		2488.38	0.01076052		3018.38	0.00475437		3548.37	0.01568292		4078.37	0.0186501
368.6	-0.00903643		898.59	0.00566156		1428.59	0.02884145		1958.59	0.02000152		2488.58	0.01122859		3018.58	0.00381613		3548.57	0.01584426		4078.57	0.01819798
368.8	-0.00875149		898.79	0.00659207		1428.79	0.02945735		1958.79	0.01968747		2488.78	0.01141768		3018.78	0.00345195		3548.77	0.01539684		4078.77	0.01789314
369	-0.00903925		898.99	0.006643		1428.99	0.02960481		1958.99	0.0197734		2488.98	0.01014612		3018.98	0.00288141		3548.97	0.01541005		4078.97	0.01806138
369.2	-0.0087776		899.19	0.00793403		1429.19	0.0300335		1959.19	0.01960735		2489.18	0.01086228		3019.18	0.00272139		3549.17	0.01493638		4079.17	0.01831651
369.4	-0.00878427		899.39	0.00938737		1429.39	0.02898929		1959.39	0.01929259		2489.38	0.01014991		3019.38	0.00297186		3549.37	0.01440908		4079.37	0.01877181
369.6	-0.0087343		899.59	0.01050088		1429.59	0.02859714		1959.59	0.01876248		2489.58	0.01017587		3019.58	0.00314493		3549.57	0.01429565		4079.57	0.01947909
369.8	-0.00762949		899.79	0.01053871		1429.79	0.02833693		1959.79	0.01879606		2489.78	0.00945157		3019.78	0.00306067		3549.77	0.01447823		4079.77	0.01891934
370	-0.00814217		899.99	0.01019807		1429.99	0.02862499		1959.99	0.01905547		2489.98	0.00881097		3019.98	0.0019816		3549.97	0.01421061		4079.97	0.01872837
370.2	-0.00828054		900.19	0.01034858		1430.19	0.02923173		1960.19	0.01834958		2490.18	0.00808945		3020.18	0.00201857		3550.17	0.01361663		4080.17	0.01938202
370.4	-0.0077161		900.39	0.00918877		1430.39	0.0285491		1960.39	0.01829518		2490.38	0.00808745		3020.38	0.00142491		3550.37	0.01308355		4080.37	0.01982903
370.6	-0.00743722		900.59	0.00949104		1430.59	0.02900995		1960.59	0.01795736		2490.58	0.00738082		3020.58	0.00078771		3550.57	0.01285065		4080.57	0.02025848
370.8	-0.007385		900.79	0.00863454		1430.79	0.02918318		1960.79	0.01845173		2490.78	0.00802136		3020.78	0.00053895		3550.77	0.01342011		4080.77	0.02161686
371	-0.00662886		900.99	0.00775668		1430.99	0.02889827		1960.99	0.01886372		2490.98	0.00858822		3020.98	0.00059183		3550.97	0.01300072		4080.97	0.02191115
371.2	-0.00646238		901.19	0.00783981		1431.19	0.02908352		1961.19	0.01856289		2491.18	0.00898774		3021.18	0.00094211		3551.17	0.01366052		4081.17	0.02265161
371.4	-0.00639336		901.39	0.00657748		1431.39	0.02881414		1961.39	0.01854778		2491.38	0.00968771		3021.38	0.00215165		3551.37	0.01330534		4081.37	0.02384036
371.6	-0.00741475		901.59	0.00619963		1431.59	0.02906254		1961.59	0.01857223		2491.58	0.01042671		3021.58	0.00243931		3551.57	0.01421663		4081.57	0.02372198
371.8	-0.00726443		901.79	0.00671351		1431.79	0.02958336		1961.79	0.01904243		2491.78	0.01159757		3021.78	0.00306609		3551.77	0.01522843		4081.77	0.02378196
372	-0.0069267		901.99	0.00557565		1431.99	0.02953537		1961.99	0.020196		2491.98	0.01108156		3021.98	0.00329884		3551.97	0.01528454		4081.97	0.02339487
372.2	-0.00857657		902.19	0.00535246		1432.19	0.02918144		1962.19	0.02061643		2492.18	0.01109949		3022.18	0.00306937		3552.17	0.01475413		4082.17	0.02340494
372.4	-0.00966371		902.39	0.00587459		1432.39	0.02969907		1962.39	0.02016236		2492.38	0.01144412		3022.38	0.0033237		3552.37	0.01459367		4082.37	0.02262325
372.6	-0.01022509		902.59	0.00592593		1432.59	0.02938652		1962.59	0.02106519		2492.58	0.01131415		3022.58	0.00277452		3552.57	0.01479058		4082.57	0.02243295
372.8	-0.0112436		902.79	0.00528817		1432.79	0.0298099		1962.79	0.02179052		2492.78	0.01163122		3022.78	0.00282264		3552.77	0.01538753		4082.77	0.02311666
373	-0.01133272		902.99	0.00580822		1432.99	0.02942237		1962.99	0.02220283		2492.98	0.01140833		3022.98	0.0030533		3552.97	0.01596189		4082.97	0.02296479
373.2	-0.01201161		903.19	0.00722627		1433.19	0.02884166		1963.19	0.02224592		2493.18	0.01178322		3023.18	0.00349164		3553.17	0.01481382		4083.17	0.02317342
373.4	-0.01151525		903.39	0.00808595		1433.39	0.02835727		1963.39	0.02146036		2493.38	0.01103646		3023.38	0.00353533		3553.37	0.01458176		4083.37	0.02272257
373.6	-0.01077339		903.59	0.00839413		1433.59	0.02788074		1963.59	0.02071369		2493.58	0.01043082		3023.58	0.00415836		3553.57	0.01420482		4083.57	0.02315742
373.8	-0.01068764		903.79	0.00859599		1433.79	0.02820951		1963.79	0.02083688		2493.78	0.00971696		3023.78	0.00397948		3553.77	0.01381238		4083.77	0.0231454
374	-0.01136198		903.99	0.00848167		1433.99	0.02866654		1963.99	0.01987905		2493.98	0.00942652		3023.98	0.00368984		3553.97	0.01410288		4083.97	0.02302758
374.2	-0.01118042		904.19	0.0087916		1434.19	0.02771061		1964.19	0.01941665		2494.18	0.00901515		3024.18	0.00276112		3554.17	0.01344121		4084.17	0.02437415
374.4	-0.01057056		904.39	0.00819609		1434.39	0.02725454		1964.39	0.01964991		2494.38	0.00908405		3024.38	0.00236875		3554.37	0.01304877		4084.37	0.02406342
374.6	-0.01066193		904.59	0.00885246		1434.59	0.02807478		1964.59	0.01925544		2494.58	0.00805284		3024.58	0.00156001		3554.57	0.01308117		4084.57	0.02416277
374.8	-0.01017395		904.79	0.00787287		1434.79	0.02802043		1964.79	0.01985234		2494.78	0.00862698		3024.78	0.00112787		3554.77	0.01298662		4084.77	0.0250849
375	-0.00964259		904.99	0.00662776		1434.99	0.02829709		1964.99	0.01971929		2494.98	0.00790863		3024.98	0.00192543		3554.97	0.01335301		4084.97	0.024425
375.2	-0.00942562		905.19	0.00579188		1435.19	0.02818572		1965.19	0.01974657		2495.18	0.00782738		3025.18	0.00232706		3555.17	0.01391619		4085.17	0.0245278
375.4	-0.00907357		905.39	0.00523139		1435.39	0.02784871		1965.39	0.01984939		2495.38	0.00745688		3025.38	0.00209866		3555.37	0.01328578		4085.37	0.02530246
375.6	-0.00939039		905.59	0.00512271		1435.59	0.02812681		1965.59	0.01980015		2495.58	0.00719908		3025.58	0.0031538		3555.57	0.01326436		4085.57	0.02524919
375.8	-0.00934675		905.79	0.00506181		1435.79	0.02911309		1965.79	0.02039434		2495.78	0.00751108		3025.78	0.00304018		3555.77	0.01322969		4085.77	0.02481566
376	-0.00961855		905.99	0.00464581		1435.99	0.02932288		1965.99	0.02033198		2495.98	0.00790518		3025.98	0.00235423		3555.97	0.01227211		4085.97	0.02485729
376.2	-0.01071282		906.19	0.0044579		1436.19	0.02938422		1966.19	0.02078909		2496.18	0.00856697		3026.18	0.00369176		3556.17	0.01214791		4086.17	0.02448628
376.4	-0.01059018		906.39	0.00416693		1436.39	0.02978523		1966.39	0.02169828		2496.38	0.00902253		3026.38	0.0037168		3556.37	0.01324683		4086.37	0.02354451
376.6	-0.01105143		906.59	0.00422706		1436.59	0.02959427		1966.59	0.02331019		2496.58	0.0093552		3026.58	0.00305145		3556.57	0.01336094		4086.57	0.02396764
376.8	-0.01125628		906.79	0.00472189		1436.79	0.02950802		1966.79	0.02237323		2496.78	0.01038321		3026.78	0.00299039		3556.77	0.01343898		4086.77	0.02446236
377	-0.01085123		906.99	0.00639475		1436.99	0.02939583		1966.99	0.02146576		2496.98	0.01046828		3026.98	0.00348908		3556.97	0.01358679		4086.97	0.02419379
377.2	-0.01013509		907.19	0.00653787		1437.19	0.0299108		1967.19	0.02052029		2497.18	0.01053284		3027.18	0.003774		3557.17	0.01277917		4087.17	0.02431137
377.4	-0.00930942		907.39	0.00706719		1437.39	0.0305727		1967.39	0.01989395		2497.38	0.01049957		3027.38	0.00438617		3557.37	0.01312728		4087.37	0.02367003
377.6	-0.00900663		907.59	0.00799118		1437.59	0.03040062		1967.59	0.0194355		2497.58	0.00969954		3027.58	0.00490271		3557.57	0.01313961		4087.57	0.02355532
377.8	-0.0091704		907.79	0.00893949		1437.79	0.03039162		1967.79	0.01882882		2497.78	0.01038015		3027.78	0.00474554		3557.77	0.01386814		4087.77	0.02345682
378	-0.00899552		907.99	0.00901486		1437.99	0.02972334		1967.99	0.0177143		2497.98	0.010366		3027.98	0.00460741		3557.97	0.01369463		4087.97	0.02321366
378.2	-0.00856476		908.19	0.00945182		1438.19	0.02847769		1968.19	0.01724404		2498.18	0.01002874		3028.18	0.00442839		3558.17	0.01331608		4088.17	0.02355132
378.4	-0.00782678		908.39	0.00918423		1438.39	0.02847367		1968.39	0.01681475		2498.38	0.00969079		3028.38	0.00466766		3558.37	0.01350541		4088.37	0.02314846
378.6	-0.00743979		908.59	0.00900601		1438.59	0.02857669		1968.59	0.01631805		2498.58	0.00933162		3028.58	0.0047187		3558.57	0.01368198		4088.57	0.02297929
378.8	-0.00634942		908.79	0.00838962		1438.79	0.02843819		1968.79	0.01643387		2498.78	0.00944831		3028.78	0.00575794		3558.77	0.01404198		4088.77	0.02335342
379	-0.00559446		908.99	0.00801953		1438.99	0.02848164		1968.99	0.01629643		2498.98	0.00861221		3028.98	0.0071772		3558.97	0.01490057		4088.97	0.02287337
379.2	-0.00502889		909.19	0.00831169		1439.19	0.02822125		1969.19	0.01615678		2499.18	0.00840568		3029.18	0.00790035		3559.17	0.01450987		4089.17	0.02307912
379.4	-0.00443679		909.39	0.00839826		1439.39	0.02829895		1969.39	0.01620325		2499.38	0.0080557		3029.38	0.00829476		3559.37	0.01431251		4089.37	0.0238207
379.6	-0.00431745		909.59	0.00831571		1439.59	0.02890976		1969.59	0.01611723		2499.58	0.0081884		3029.58	0.00987243		3559.57	0.01389961		4089.57	0.02397065
379.8	-0.00362922		909.79	0.00815975		1439.79	0.0295874		1969.79	0.01617199		2499.78	0.00870622		3029.78	0.00979051		3559.77	0.01435776		4089.77	0.02389072
380	-0.00362922		909.99	0.00815975		1439.99	0.0295874		1969.98	0.01617199		2499.98	0.00870622		3029.97	0.00979051		3559.97	0.01435776		4089.97	0.02389072
380.2	-0.00362472		910.19	0.0083474		1440.19	0.02905441		1970.18	0.01634913		2500.18	0.00954048		3030.17	0.00988577		3560.17	0.01392298		4090.17	0.0235672
380.4	-0.00439906		910.39	0.00902088		1440.39	0.02872789		1970.38	0.01734131		2500.38	0.01069902		3030.37	0.01070655		3560.37	0.01417199		4090.37	0.02294475
380.6	-0.00497009		910.59	0.00905029		1440.59	0.02817655		1970.58	0.01829638		2500.58	0.01220609		3030.57	0.01091159		3560.57	0.01400252		4090.57	0.02274584
380.8	-0.00526001		910.79	0.0094834		1440.79	0.02748102		1970.78	0.01919312		2500.78	0.01337902		3030.77	0.01227056		3560.77	0.01413248		4090.77	0.02244369
381	-0.00537034		910.99	0.00968076		1440.99	0.02695804		1970.98	0.01996641		2500.98	0.01396377		3030.97	0.01247985		3560.97	0.01369416		4090.97	0.02298763
381.2	-0.00567739		911.19	0.0103043		1441.19	0.02619989		1971.18	0.01967405		2501.18	0.01470084		3031.17	0.01311787		3561.17	0.01289599		4091.17	0.02246078
381.4	-0.00609244		911.39	0.01100272		1441.39	0.02501891		1971.38	0.01998012		2501.38	0.0147385		3031.37	0.01373803		3561.37	0.01275529		4091.37	0.02156353
381.6	-0.00659205		911.59	0.01133573		1441.59	0.02462253		1971.58	0.02014109		2501.58	0.0144851		3031.57	0.01407838		3561.57	0.01220672		4091.57	0.02152961
381.8	-0.00660159		911.79	0.01105333		1441.79	0.02493956		1971.78	0.02007156		2501.78	0.01420771		3031.77	0.01523099		3561.77	0.01245494		4091.77	0.02225698
382	-0.0062679		911.99	0.01079214		1441.99	0.02482149		1971.98	0.02050892		2501.98	0.0139303		3031.97	0.01569496		3561.97	0.0116511		4091.97	0.022007
382.2	-0.00731933		912.19	0.00977933		1442.19	0.02522218		1972.18	0.02057173		2502.18	0.01423437		3032.17	0.0159087		3562.17	0.0107827		4092.17	0.02200875
382.4	-0.00780824		912.39	0.00898889		1442.39	0.02450052		1972.38	0.02034821		2502.38	0.01392865		3032.37	0.01574119		3562.37	0.01070555		4092.37	0.02207918
382.6	-0.00848346		912.59	0.00929662		1442.59	0.02364362		1972.58	0.02003342		2502.58	0.01312262		3032.57	0.01543958		3562.57	0.01109323		4092.57	0.02208638
382.8	-0.00791315		912.79	0.01008808		1442.79	0.02409131		1972.78	0.02045501		2502.78	0.01315856		3032.77	0.0149482		3562.77	0.01103047		4092.77	0.02257928
383	-0.0085726		912.99	0.009777		1442.99	0.02455298		1972.98	0.02211309		2502.98	0.01357822		3032.97	0.01544782		3562.97	0.00974138		4092.97	0.02333875
383.2	-0.00855006		913.19	0.00967447		1443.19	0.02452123		1973.18	0.02196082		2503.18	0.01337663		3033.17	0.01597184		3563.17	0.01012222		4093.17	0.02510009
383.4	-0.00811618		913.39	0.00902691		1443.39	0.02510338		1973.38	0.02231869		2503.38	0.01375775		3033.37	0.01627638		3563.37	0.0094714		4093.37	0.02568782
383.6	-0.0087343		913.59	0.00835327		1443.59	0.02493847		1973.58	0.02249816		2503.58	0.01336281		3033.57	0.01664936		3563.57	0.00896494		4093.57	0.02683566
383.8	-0.00883012		913.79	0.00765007		1443.79	0.02484343		1973.78	0.0223575		2503.78	0.01300359		3033.77	0.01684859		3563.77	0.00949375		4093.77	0.02774333
384	-0.00903963		913.99	0.00726827		1443.99	0.02478915		1973.98	0.02332207		2503.98	0.01416561		3033.97	0.01635452		3563.97	0.00997722		4093.97	0.02762961
384.2	-0.00923531		914.19	0.00669411		1444.19	0.02483829		1974.18	0.02323958		2504.18	0.01499383		3034.17	0.01557145		3564.17	0.01031352		4094.17	0.02819388
384.4	-0.00917169		914.39	0.0071815		1444.39	0.02471503		1974.38	0.02356503		2504.38	0.01541803		3034.37	0.01498299		3564.37	0.01147392		4094.37	0.02829504
384.6	-0.00892883		914.59	0.00623135		1444.59	0.0244928		1974.58	0.02373071		2504.58	0.01509802		3034.57	0.01387134		3564.57	0.01196464		4094.57	0.02880383
384.8	-0.00805463		914.79	0.00583135		1444.79	0.02417755		1974.78	0.02427415		2504.78	0.01534679		3034.77	0.01349254		3564.77	0.01286995		4094.77	0.02855382
385	-0.00748146		914.99	0.00669843		1444.99	0.02395251		1974.98	0.02490017		2504.98	0.01523741		3034.97	0.01207499		3564.97	0.01267528		4094.97	0.0288755
385.2	-0.00707855		915.19	0.0067684		1445.19	0.02390906		1975.18	0.02359056		2505.18	0.01512011		3035.17	0.01192362		3565.17	0.01295855		4095.17	0.02838746
385.4	-0.00618353		915.39	0.00728385		1445.39	0.02324082		1975.38	0.02442089		2505.38	0.01464152		3035.37	0.0116519		3565.37	0.01380479		4095.37	0.02822053
385.6	-0.00564667		915.59	0.00736583		1445.59	0.02407968		1975.58	0.02437049		2505.58	0.01414341		3035.57	0.01142379		3565.57	0.01408752		4095.57	0.02861577
385.8	-0.00494792		915.79	0.00672029		1445.79	0.02497453		1975.78	0.02462186		2505.78	0.01439797		3035.77	0.01172337		3565.77	0.0146229		4095.77	0.02781642
386	-0.00451004		915.99	0.00664485		1445.99	0.02502198		1975.98	0.02511881		2505.98	0.01438563		3035.97	0.0109539		3565.97	0.01414993		4095.97	0.0271434
386.2	-0.00536061		916.19	0.00690704		1446.19	0.02552803		1976.18	0.02495914		2506.18	0.01520468		3036.17	0.0111945		3566.17	0.01403828		4096.17	0.0267679
386.4	-0.00503311		916.39	0.00739386		1446.39	0.0249499		1976.38	0.02470591		2506.38	0.01477846		3036.37	0.01115305		3566.37	0.01391775		4096.37	0.02636171
386.6	-0.00523252		916.59	0.00835467		1446.59	0.02407065		1976.58	0.02475949		2506.58	0.01460781		3036.57	0.01227699		3566.57	0.01387469		4096.57	0.02586166
386.8	-0.00497302		916.79	0.00808229		1446.79	0.0243995		1976.78	0.02419838		2506.78	0.01426285		3036.77	0.01224512		3566.77	0.01328921		4096.77	0.02702175
387	-0.00550598		916.99	0.00773663		1446.99	0.02462828		1976.98	0.02414948		2506.98	0.01390097		3036.97	0.0129218		3566.97	0.01239276		4096.97	0.02744806
387.2	-0.00629321		917.19	0.00786344		1447.19	0.02519264		1977.18	0.02329143		2507.18	0.01338149		3037.17	0.01352103		3567.17	0.01188388		4097.17	0.02741066
387.4	-0.00651219		917.39	0.0082549		1447.39	0.02513757		1977.38	0.02342097		2507.38	0.01325675		3037.37	0.01420861		3567.37	0.01097496		4097.37	0.0271132
387.6	-0.00795371		917.59	0.00843173		1447.59	0.02446216		1977.58	0.0235531		2507.58	0.0127402		3037.57	0.01467704		3567.57	0.0115072		4097.57	0.02713755
387.8	-0.00829031		917.79	0.00767037		1447.79	0.02518055		1977.78	0.02311143		2507.78	0.01321192		3037.77	0.01584249		3567.77	0.01116666		4097.77	0.02692066
388	-0.00801504		917.99	0.00712949		1447.99	0.02526118		1977.98	0.02182792		2507.98	0.01370138		3037.97	0.01528647		3567.97	0.01152492		4097.97	0.02665918
388.2	-0.00901024		918.19	0.00726201		1448.19	0.02547387		1978.18	0.02099855		2508.18	0.01378272		3038.17	0.01488401		3568.17	0.01152014		4098.17	0.02759496
388.4	-0.00943817		918.39	0.00728031		1448.39	0.02507474		1978.38	0.02093748		2508.38	0.01307665		3038.37	0.01442342		3568.37	0.01151383		4098.37	0.02710958
388.6	-0.0101034		918.59	0.00629075		1448.59	0.02514517		1978.58	0.02157307		2508.58	0.01301278		3038.57	0.01412403		3568.57	0.01196852		4098.57	0.02722815
388.8	-0.01025438		918.79	0.00629239		1448.79	0.02529767		1978.78	0.02177515		2508.78	0.01417446		3038.77	0.01343894		3568.77	0.01155437		4098.77	0.02707834
389	-0.00956264		918.99	0.00701262		1448.99	0.02508556		1978.98	0.02200201		2508.98	0.01423193		3038.97	0.01336909		3568.97	0.01048912		4098.97	0.02761407
389.2	-0.00979622		919.19	0.00522456		1449.19	0.02531604		1979.18	0.02139902		2509.18	0.01421253		3039.17	0.01345288		3569.17	0.01065484		4099.17	0.02743005
389.4	-0.009177		919.39	0.00507725		1449.39	0.02504433		1979.38	0.02263206		2509.38	0.01459924		3039.37	0.01302408		3569.37	0.01009447		4099.37	0.02592778
389.6	-0.00918373		919.59	0.00539772		1449.59	0.02623676		1979.58	0.02151295		2509.58	0.01481771		3039.57	0.01305699		3569.57	0.01009373		4099.57	0.02627294
389.8	-0.00952066		919.79	0.00585535		1449.79	0.02655134		1979.78	0.02144308		2509.78	0.01471107		3039.77	0.01278019		3569.77	0.01033904		4099.77	0.02545738
390	-0.0087469		919.99	0.00641512		1449.99	0.02684798		1979.98	0.02098424		2509.98	0.01484339		3039.97	0.01241799		3569.97	0.01059318		4099.97	0.02559527
390.2	-0.00931492		920.19	0.00709298		1450.19	0.02723742		1980.18	0.02085701		2510.18	0.01605518		3040.17	0.0124163		3570.17	0.01069029		4100.17	0.02484409
390.4	-0.00976259		920.39	0.00759563		1450.39	0.02610795		1980.38	0.02124094		2510.38	0.01587332		3040.37	0.01286687		3570.37	0.01170489		4100.37	0.02484427
390.6	-0.00969497		920.59	0.0077738		1450.59	0.02569207		1980.58	0.02152503		2510.58	0.01538114		3040.57	0.01384785		3570.57	0.01254193		4100.57	0.02541647
390.8	-0.01007619		920.79	0.0079062		1450.79	0.02552084		1980.78	0.02118916		2510.78	0.01454893		3040.77	0.01252019		3570.77	0.01255352		4100.77	0.02558033
391	-0.00949458		920.99	0.00784386		1450.99	0.02554978		1980.98	0.0214897		2510.98	0.01442324		3040.97	0.01301899		3570.97	0.0122209		4100.97	0.02481534
391.2	-0.01006851		921.19	0.00778994		1451.19	0.02506019		1981.18	0.02169957		2511.18	0.0149		3041.17	0.0130551		3571.17	0.01209277		4101.17	0.0248295
391.4	-0.00959553		921.39	0.00789189		1451.39	0.02473123		1981.38	0.02204685		2511.38	0.01408233		3041.37	0.01363985		3571.37	0.01244529		4101.37	0.02456867
391.6	-0.00978511		921.59	0.00686731		1451.59	0.02466335		1981.58	0.02180748		2511.58	0.01431459		3041.57	0.01387633		3571.57	0.01252013		4101.57	0.0246523
391.8	-0.00936942		921.79	0.00611049		1451.79	0.02509038		1981.78	0.0216247		2511.78	0.01506343		3041.77	0.01435705		3571.77	0.01268376		4101.77	0.02518684
392	-0.00943819		921.99	0.00613819		1451.99	0.02445888		1981.98	0.02158575		2511.98	0.01494453		3041.97	0.01397477		3571.97	0.01357496		4101.97	0.02628976
392.2	-0.00974113		922.19	0.00658507		1452.19	0.02439257		1982.18	0.02235397		2512.18	0.01530354		3042.17	0.01468428		3572.17	0.01347878		4102.17	0.0262019
392.4	-0.00973727		922.39	0.00625037		1452.39	0.02467805		1982.38	0.02284049		2512.38	0.01534275		3042.37	0.01474471		3572.37	0.01334324		4102.37	0.02562648
392.6	-0.00827736		922.59	0.00658669		1452.59	0.02485563		1982.58	0.02232978		2512.58	0.01565522		3042.57	0.01475685		3572.57	0.01310389		4102.57	0.02584742
392.8	-0.00824267		922.79	0.00593291		1452.79	0.02503531		1982.78	0.02233849		2512.78	0.01554184		3042.77	0.01520028		3572.77	0.01237812		4102.77	0.02582125
393	-0.00815691		922.99	0.0059396		1452.99	0.02501924		1982.98	0.02286349		2512.98	0.01506802		3042.97	0.01571138		3572.97	0.0119634		4102.97	0.02602074
393.2	-0.00862225		923.19	0.00419627		1453.19	0.02499772		1983.18	0.02237915		2513.18	0.01487117		3043.17	0.01552708		3573.17	0.0118195		4103.17	0.02567146
393.4	-0.00795159		923.39	0.00417243		1453.39	0.02398851		1983.38	0.02145515		2513.38	0.01426261		3043.37	0.01494975		3573.37	0.01118409		4103.37	0.02546002
393.6	-0.00832206		923.59	0.00475959		1453.59	0.02403971		1983.58	0.02081051		2513.58	0.01365209		3043.57	0.01505753		3573.57	0.01182376		4103.57	0.02670962
393.8	-0.00903199		923.79	0.00500109		1453.79	0.02387897		1983.78	0.02039923		2513.78	0.01302615		3043.77	0.01383558		3573.77	0.01236777		4103.77	0.02521801
394	-0.00923662		923.99	0.00464012		1453.99	0.02368084		1983.98	0.0202693		2513.98	0.01338916		3043.97	0.01291245		3573.97	0.0128076		4103.97	0.02523619
394.2	-0.0108649		924.19	0.00466759		1454.19	0.02283314		1984.18	0.02006058		2514.18	0.01410331		3044.17	0.0124922		3574.17	0.01324625		4104.17	0.02563022
394.4	-0.01168324		924.39	0.00430715		1454.39	0.02202832		1984.38	0.02018296		2514.38	0.01328328		3044.37	0.01251685		3574.37	0.01422011		4104.37	0.02625103
394.6	-0.01240458		924.59	0.00445425		1454.59	0.02165142		1984.58	0.01978654		2514.58	0.01275717		3044.57	0.01109159		3574.57	0.01412058		4104.57	0.02635346
394.8	-0.01254608		924.79	0.0045963		1454.79	0.02098925		1984.78	0.01942328		2514.78	0.01276365		3044.77	0.01020603		3574.77	0.01389589		4104.77	0.02609997
395	-0.01269894		924.99	0.00407066		1454.99	0.02054585		1984.98	0.01929733		2514.98	0.0129898		3044.97	0.01044821		3574.97	0.01309713		4104.97	0.0259265
395.2	-0.01393175		925.19	0.00414049		1455.19	0.01980818		1985.18	0.01909124		2515.18	0.01288034		3045.17	0.01084432		3575.17	0.01290006		4105.17	0.02658866
395.4	-0.01422993		925.39	0.0048573		1455.39	0.02030564		1985.38	0.0194202		2515.38	0.0127533		3045.37	0.01092443		3575.37	0.01298493		4105.37	0.02554487
395.6	-0.01451014		925.59	0.00476112		1455.59	0.02038183		1985.58	0.01980971		2515.58	0.01319599		3045.57	0.01128103		3575.57	0.01301651		4105.57	0.02604128
395.8	-0.01419507		925.79	0.00537574		1455.79	0.02051931		1985.78	0.02090278		2515.78	0.01321476		3045.77	0.01134677		3575.77	0.01364984		4105.77	0.02623441
396	-0.01383102		925.99	0.00582065		1455.99	0.02123098		1985.98	0.02106418		2515.98	0.01264796		3045.97	0.01223684		3575.97	0.01358601		4105.97	0.0266048
396.2	-0.01306246		926.19	0.00599099		1456.19	0.0221662		1986.18	0.02093229		2516.18	0.01299569		3046.17	0.01274955		3576.17	0.0126016		4106.17	0.02635775
396.4	-0.01271085		926.39	0.00619016		1456.39	0.02365431		1986.38	0.0206409		2516.38	0.01241094		3046.37	0.01307986		3576.37	0.01168237		4106.37	0.02591161
396.6	-0.0116281		926.59	0.0071336		1456.59	0.02407704		1986.58	0.02063134		2516.58	0.0120204		3046.57	0.01388176		3576.57	0.01114116		4106.57	0.02639608
396.8	-0.01217535		926.79	0.00678556		1456.79	0.02451948		1986.78	0.02118667		2516.78	0.01126648		3046.77	0.01463704		3576.77	0.01075782		4106.77	0.02687852
397	-0.01171464		926.99	0.00689056		1456.99	0.02490368		1986.98	0.02160865		2516.98	0.01099716		3046.97	0.01448914		3576.97	0.00987582		4106.97	0.02727612
397.2	-0.01062649		927.19	0.00589808		1457.19	0.02428728		1987.18	0.02090815		2517.18	0.01047764		3047.17	0.01413634		3577.17	0.00936533		4107.17	0.0264197
397.4	-0.01126176		927.39	0.00587364		1457.39	0.02387477		1987.38	0.02124496		2517.38	0.01001088		3047.37	0.01363031		3577.37	0.00870973		4107.37	0.0256465
397.6	-0.0112445		927.59	0.00640257		1457.59	0.02513903		1987.58	0.02226887		2517.58	0.01048374		3047.57	0.01321379		3577.57	0.00855812		4107.57	0.02623803
397.8	-0.01189955		927.79	0.00734478		1457.79	0.02559813		1987.78	0.02205335		2517.78	0.01091896		3047.77	0.01262118		3577.77	0.00859832		4107.77	0.02559861
398	-0.01167092		927.99	0.0075669		1457.99	0.0247446		1987.98	0.02216728		2517.98	0.01064048		3047.97	0.01337682		3577.97	0.00897097		4107.97	0.02632631
398.2	-0.011841		928.19	0.00699115		1458.19	0.0246334		1988.18	0.02231085		2518.18	0.01070241		3048.17	0.01338287		3578.17	0.00852239		4108.17	0.0264615
398.4	-0.01189035		928.39	0.00668909		1458.39	0.02495963		1988.38	0.02269191		2518.38	0.00997982		3048.37	0.0131687		3578.37	0.0092508		4108.37	0.02607314
398.6	-0.0123058		928.59	0.00684744		1458.59	0.02425066		1988.58	0.02275927		2518.58	0.01044811		3048.57	0.01327564		3578.57	0.00882078		4108.57	0.02568393
398.8	-0.01230544		928.79	0.00661302		1458.79	0.02396281		1988.78	0.02261608		2518.78	0.01077592		3048.77	0.01371948		3578.77	0.00909229		4108.77	0.02501387
399	-0.01258845		928.99	0.00674342		1458.99	0.02402639		1988.98	0.02294311		2518.98	0.01175435		3048.97	0.01414392		3578.97	0.00814902		4108.97	0.02412828
399.2	-0.01319927		929.19	0.00656432		1459.19	0.02348794		1989.18	0.0234444		2519.18	0.01188026		3049.17	0.01444174		3579.17	0.00910423		4109.17	0.02395507
399.4	-0.01335987		929.39	0.00674545		1459.39	0.02417797		1989.38	0.02398504		2519.38	0.01204744		3049.37	0.01344929		3579.37	0.01033985		4109.37	0.02307472
399.6	-0.0132867		929.59	0.00588038		1459.59	0.02343949		1989.58	0.02390843		2519.58	0.01242703		3049.57	0.01370243		3579.57	0.01104309		4109.57	0.02357194
399.8	-0.0127522		929.79	0.00522937		1459.79	0.02280316		1989.78	0.02405895		2519.78	0.0123427		3049.77	0.01351957		3579.77	0.010635		4109.77	0.02365453
400	-0.01195321		929.99	0.00500691		1459.99	0.02291181		1989.98	0.02366817		2519.98	0.01280398		3049.97	0.01342468		3579.97	0.0109927		4109.97	0.02325282
400.2	-0.01155186		930.19	0.00506005		1460.19	0.0229457		1990.18	0.0225042		2520.18	0.01341571		3050.17	0.01302064		3580.17	0.01083626		4110.17	0.02290157
400.4	-0.0109413		930.39	0.00493583		1460.39	0.02351304		1990.38	0.02178523		2520.38	0.01359029		3050.37	0.01251397		3580.37	0.01165933		4110.37	0.02217441
400.6	-0.01065969		930.59	0.0053809		1460.59	0.02327425		1990.58	0.0215608		2520.58	0.01366762		3050.57	0.01266609		3580.57	0.0120353		4110.57	0.02271709
400.8	-0.0105093		930.79	0.00532532		1460.79	0.02243162		1990.78	0.02103573		2520.78	0.01375847		3050.77	0.01251535		3580.77	0.01156543		4110.77	0.02342082
401	-0.01028644		930.99	0.00546945		1460.99	0.02197194		1990.98	0.02067428		2520.98	0.0139334		3050.97	0.01196053		3580.97	0.01102505		4110.97	0.02341502
401.2	-0.01045037		931.19	0.00544618		1461.19	0.02152144		1991.18	0.0202826		2521.18	0.014128		3051.17	0.01170992		3581.17	0.01116131		4111.17	0.02326736
401.4	-0.01096455		931.39	0.00476274		1461.39	0.02161264		1991.38	0.02064268		2521.38	0.01429736		3051.37	0.01156185		3581.37	0.01047176		4111.37	0.02414125
401.6	-0.0107683		931.59	0.00545202		1461.59	0.02179674		1991.58	0.02145243		2521.58	0.01472185		3051.57	0.01197825		3581.57	0.01105036		4111.57	0.0258503
401.8	-0.010927		931.79	0.00547971		1461.79	0.0210079		1991.78	0.02119996		2521.78	0.01356586		3051.77	0.01311038		3581.77	0.01087087		4111.77	0.02610253
402	-0.01133847		931.99	0.00458739		1461.99	0.01996542		1991.98	0.02083173		2521.98	0.01283913		3051.97	0.01419694		3581.97	0.01088557		4111.97	0.02716538
402.2	-0.01176603		932.19	0.00371017		1462.19	0.02040936		1992.18	0.02102878		2522.18	0.0127018		3052.17	0.01359032		3582.17	0.01009711		4112.17	0.02715025
402.4	-0.01243836		932.39	0.0038156		1462.39	0.01963295		1992.38	0.02090695		2522.38	0.01223281		3052.37	0.01363064		3582.37	0.01030135		4112.37	0.02773683
402.6	-0.01353879		932.59	0.0034793		1462.59	0.01969535		1992.58	0.0211937		2522.58	0.01174232		3052.57	0.01404652		3582.57	0.00964653		4112.57	0.02840094
402.8	-0.0135133		932.79	0.00357342		1462.79	0.02018054		1992.78	0.02194662		2522.78	0.01154796		3052.77	0.01373001		3582.77	0.01002505		4112.77	0.02747116
403	-0.01397882		932.99	0.00262396		1462.99	0.02119643		1992.98	0.02210611		2522.98	0.01194721		3052.97	0.01373057		3582.97	0.0097225		4112.97	0.02766295
403.2	-0.01473904		933.19	0.00265011		1463.19	0.02117017		1993.18	0.02206912		2523.18	0.01112812		3053.17	0.01327456		3583.17	0.01030982		4113.17	0.02815581
403.4	-0.01406865		933.39	0.00285909		1463.39	0.02237493		1993.38	0.02186507		2523.38	0.01132267		3053.37	0.01217976		3583.37	0.01009527		4113.37	0.02851563
403.6	-0.0138531		933.59	0.00203413		1463.59	0.02152679		1993.58	0.02065531		2523.58	0.01224714		3053.57	0.01205906		3583.57	0.00925475		4113.57	0.02885887
403.8	-0.01245883		933.79	0.00250408		1463.79	0.02170245		1993.78	0.02101426		2523.78	0.01273256		3053.77	0.01149438		3583.77	0.00861955		4113.77	0.02891173
404	-0.01213931		933.99	0.00377703		1463.99	0.02287005		1993.98	0.02020657		2523.98	0.01321108		3053.97	0.01087574		3583.97	0.00931496		4113.97	0.02883173
404.2	-0.01236767		934.19	0.00444511		1464.19	0.02333039		1994.18	0.01941939		2524.18	0.01391159		3054.17	0.010493		3584.17	0.00873388		4114.17	0.02804243
404.4	-0.01226756		934.39	0.00499346		1464.39	0.02345103		1994.38	0.01961625		2524.38	0.01397118		3054.37	0.00992688		3584.37	0.00881803		4114.37	0.0274219
404.6	-0.01178928		934.59	0.0057635		1464.59	0.02303317		1994.58	0.01964185		2524.58	0.01403258		3054.57	0.00925108		3584.57	0.00875439		4114.57	0.02729578
404.8	-0.01174037		934.79	0.00624318		1464.79	0.02255338		1994.78	0.02060269		2524.78	0.01398208		3054.77	0.00831704		3584.77	0.00815944		4114.77	0.02734789
405	-0.01188393		934.99	0.00669852		1464.99	0.02302621		1994.98	0.02124996		2524.98	0.01413077		3054.97	0.00796307		3584.97	0.00853372		4114.97	0.02603316
405.2	-0.01115885		935.19	0.00601765		1465.19	0.02302438		1995.18	0.02183531		2525.18	0.01437133		3055.17	0.00832304		3585.17	0.00928756		4115.17	0.02586341
405.4	-0.01126867		935.39	0.00632814		1465.39	0.02356377		1995.38	0.02232424		2525.38	0.01407545		3055.37	0.00840716		3585.37	0.00899891		4115.37	0.02535767
405.6	-0.01236396		935.59	0.00685495		1465.59	0.02337524		1995.58	0.02280931		2525.58	0.0134714		3055.57	0.00811697		3585.57	0.00951576		4115.57	0.0251038
405.8	-0.01267405		935.79	0.00695057		1465.79	0.02255157		1995.78	0.02185912		2525.78	0.01271963		3055.77	0.00916099		3585.77	0.00870767		4115.77	0.02577567
406	-0.01376707		935.99	0.00697457		1465.99	0.02086686		1995.98	0.02232289		2525.98	0.01241283		3055.97	0.00993717		3585.97	0.01029479		4115.97	0.0261245
406.2	-0.01354453		936.19	0.00680296		1466.19	0.02015602		1996.18	0.02212939		2526.18	0.01223757		3056.17	0.00976188		3586.17	0.01033224		4116.17	0.02576113
406.4	-0.01435581		936.39	0.00752458		1466.39	0.0193528		1996.38	0.02266518		2526.38	0.01140265		3056.37	0.01001789		3586.37	0.01062581		4116.37	0.02587248
406.6	-0.0147331		936.59	0.00705222		1466.59	0.02066762		1996.58	0.02278096		2526.58	0.01099139		3056.57	0.0100799		3586.57	0.0108863		4116.57	0.02516848
406.8	-0.01415975		936.79	0.00642117		1466.79	0.02132826		1996.78	0.02313501		2526.78	0.01022793		3056.77	0.00974849		3586.77	0.01118229		4116.77	0.02479814
407	-0.01396623		936.99	0.00601479		1466.99	0.02231109		1996.98	0.02275078		2526.98	0.01029512		3056.97	0.01019274		3586.97	0.0109405		4116.97	0.02552756
407.2	-0.0130259		937.19	0.00622404		1467.19	0.02229672		1997.18	0.02239324		2527.18	0.00990912		3057.17	0.00976168		3587.17	0.01108303		4117.17	0.02532463
407.4	-0.01285812		937.39	0.00654937		1467.39	0.02280928		1997.38	0.02281308		2527.38	0.01044391		3057.37	0.00999185		3587.37	0.01052074		4117.37	0.0253108
407.6	-0.01283017		937.59	0.00554263		1467.59	0.02194771		1997.58	0.02246327		2527.58	0.01086069		3057.57	0.01025716		3587.57	0.00963917		4117.57	0.02572439
407.8	-0.01239104		937.79	0.00546586		1467.79	0.02210606		1997.78	0.0231881		2527.78	0.01099583		3057.77	0.01015091		3587.77	0.00903923		4117.77	0.02656067
408	-0.01277065		937.99	0.00543914		1467.99	0.02221401		1997.98	0.02305477		2527.98	0.01112937		3057.97	0.01034576		3587.97	0.00865495		4117.97	0.02628445
408.2	-0.01259209		938.19	0.00571089		1468.19	0.02169915		1998.18	0.02390528		2528.18	0.01182111		3058.17	0.01083339		3588.17	0.00697468		4118.17	0.02603275
408.4	-0.01258424		938.39	0.00559257		1468.39	0.02162142		1998.38	0.02426863		2528.38	0.01115409		3058.37	0.0107658		3588.37	0.00688665		4118.37	0.02612432
408.6	-0.01274979		938.59	0.00437829		1468.59	0.02193795		1998.58	0.02501573		2528.58	0.01130873		3058.57	0.00966933		3588.57	0.00678578		4118.57	0.02686097
408.8	-0.01270069		938.79	0.00406763		1468.79	0.02150954		1998.78	0.02529206		2528.78	0.01126831		3058.77	0.01004855		3588.77	0.00571274		4118.77	0.0272778
409	-0.01260191		938.99	0.0040449		1468.99	0.02183681		1998.98	0.02444498		2528.98	0.01133547		3058.97	0.01050775		3588.97	0.0060459		4118.97	0.02690727
409.2	-0.01211146		939.19	0.00337473		1469.19	0.02206748		1999.18	0.02323815		2529.18	0.01105444		3059.17	0.01049292		3589.17	0.00559315		4119.17	0.02699178
409.4	-0.01305966		939.39	0.00252746		1469.39	0.02223811		1999.38	0.02224964		2529.38	0.01144965		3059.37	0.01021364		3589.37	0.00524337		4119.37	0.02726413
409.6	-0.01344547		939.59	0.00250456		1469.59	0.02113859		1999.58	0.02180986		2529.58	0.01034208		3059.57	0.01026227		3589.57	0.00551343		4119.57	0.02781358
409.8	-0.01332127		939.79	0.0027301		1469.79	0.02025796		1999.78	0.02095647		2529.78	0.01025088		3059.77	0.01139853		3589.77	0.00623306		4119.77	0.02834412
410	-0.01353744		939.99	0.00200062		1469.99	0.01947485		1999.98	0.02072546		2529.98	0.00940896		3059.97	0.01141439		3589.97	0.00790558		4119.97	0.02798509
410.2	-0.01418633		940.19	0.00160727		1470.19	0.02009391		2000.18	0.02037248		2530.18	0.00974994		3060.17	0.01082125		3590.17	0.00872537		4120.17	0.02776583
410.4	-0.01472137		940.39	0.00139132		1470.39	0.02118612		2000.38	0.02007372		2530.38	0.00932366		3060.37	0.01045148		3590.37	0.00964526		4120.37	0.02745767
410.6	-0.01504573		940.59	0.00112344		1470.59	0.02171915		2000.58	0.0200465		2530.58	0.00918959		3060.57	0.01088146		3590.57	0.01018771		4120.57	0.02652665
410.8	-0.01481036		940.79	0.00120953		1470.79	0.02194731		2000.78	0.02013524		2530.78	0.00910679		3060.77	0.01145589		3590.77	0.01113242		4120.77	0.02544925
411	-0.01485066		940.99	0.00177992		1470.99	0.02256959		2000.98	0.02035345		2530.98	0.00957474		3060.97	0.01219376		3590.97	0.01201237		4120.97	0.02421979
411.2	-0.01514396		941.19	0.00164388		1471.19	0.02250753		2001.18	0.02018468		2531.18	0.0094603		3061.17	0.01172825		3591.17	0.01273006		4121.17	0.02347041
411.4	-0.01608886		941.39	0.00228606		1471.39	0.0225598		2001.38	0.021063		2531.38	0.01054687		3061.37	0.01125644		3591.37	0.01185667		4121.37	0.02365931
411.6	-0.01672085		941.59	0.00175209		1471.59	0.02234892		2001.58	0.02069448		2531.58	0.01074728		3061.57	0.01064733		3591.57	0.01247974		4121.57	0.02413459
411.8	-0.01703476		941.79	0.00272513		1471.79	0.0224616		2001.78	0.02102482		2531.78	0.01108691		3061.77	0.01002141		3591.77	0.0127842		4121.77	0.02458225
412	-0.01707056		941.99	0.00303821		1471.99	0.02301021		2001.98	0.02145709		2531.98	0.01178869		3061.97	0.0099978		3591.97	0.01311553		4121.97	0.02439712
412.2	-0.01782839		942.19	0.00399189		1472.19	0.02240645		2002.18	0.02134767		2532.18	0.01174748		3062.17	0.00934595		3592.17	0.01256948		4122.17	0.02519974
412.4	-0.017831		942.39	0.00402		1472.39	0.02230513		2002.38	0.02097265		2532.38	0.01198695		3062.37	0.00823257		3592.37	0.0117373		4122.37	0.02494759
412.6	-0.01761208		942.59	0.00411274		1472.59	0.02221987		2002.58	0.0215112		2532.58	0.01255125		3062.57	0.00729505		3592.57	0.01126988		4122.57	0.0261706
412.8	-0.01755244		942.79	0.00468975		1472.79	0.02145755		2002.78	0.02043642		2532.78	0.01265164		3062.77	0.00709281		3592.77	0.01042955		4122.77	0.02604006
413	-0.01751246		942.99	0.00401653		1472.99	0.02180404		2002.98	0.02061791		2532.98	0.01174319		3062.97	0.00708439		3592.97	0.01084778		4122.97	0.02582967
413.2	-0.01791296		943.19	0.00353535		1473.19	0.02119216		2003.18	0.0197647		2533.18	0.01175414		3063.17	0.00681146		3593.17	0.01027381		4123.17	0.02557475
413.4	-0.01788154		943.39	0.00360113		1473.39	0.02047569		2003.38	0.02014312		2533.38	0.0120333		3063.37	0.00672285		3593.37	0.01025157		4123.37	0.02604755
413.6	-0.01720954		943.59	0.00465595		1473.59	0.02034293		2003.58	0.02054996		2533.58	0.01081677		3063.57	0.00688175		3593.57	0.00956602		4123.57	0.02490212
413.8	-0.01717945		943.79	0.00464896		1473.79	0.02020774		2003.78	0.01983405		2533.78	0.01131532		3063.77	0.00746623		3593.77	0.00964173		4123.77	0.02421832
414	-0.01704659		943.99	0.00393402		1473.99	0.02027977		2003.98	0.01962187		2533.98	0.01112017		3063.97	0.0084933		3593.97	0.00966038		4123.97	0.02410021
414.2	-0.01681321		944.19	0.00377952		1474.19	0.01990926		2004.18	0.01999756		2534.18	0.01150095		3064.17	0.00910224		3594.17	0.00925453		4124.17	0.0239904
414.4	-0.01602775		944.39	0.00310562		1474.39	0.01991903		2004.38	0.01916595		2534.38	0.01090184		3064.37	0.00984586		3594.37	0.00887366		4124.37	0.02289254
414.6	-0.01537785		944.59	0.00313082		1474.59	0.01976097		2004.58	0.0197351		2534.58	0.01062666		3064.57	0.01124477		3594.57	0.00782188		4124.57	0.02211272
414.8	-0.01467163		944.79	0.00301644		1474.79	0.02000212		2004.78	0.01988581		2534.78	0.00994875		3064.77	0.01200656		3594.77	0.00803577		4124.77	0.02049497
415	-0.01419371		944.99	0.00321939		1474.99	0.02106759		2004.98	0.02071249		2534.98	0.00828644		3064.97	0.01229707		3594.97	0.0073952		4124.97	0.01982267
415.2	-0.01385744		945.19	0.00224409		1475.19	0.02061169		2005.18	0.02121574		2535.18	0.00840138		3065.17	0.01176633		3595.17	0.00636605		4125.17	0.01992807
415.4	-0.0144471		945.39	0.00208468		1475.39	0.02071068		2005.38	0.02050328		2535.38	0.00848845		3065.37	0.01152306		3595.37	0.00585263		4125.37	0.01985117
415.6	-0.01508413		945.59	0.00177921		1475.59	0.02055702		2005.58	0.0201718		2535.58	0.00794982		3065.57	0.01109533		3595.57	0.00664252		4125.57	0.0193015
415.8	-0.01448741		945.79	0.00161888		1475.79	0.02093906		2005.78	0.02052313		2535.78	0.00792582		3065.77	0.01117092		3595.77	0.00638068		4125.77	0.01990126
416	-0.01383564		945.99	0.00096551		1475.99	0.02082178		2005.98	0.02006977		2535.98	0.00790416		3065.97	0.01065823		3595.97	0.00603876		4125.97	0.02062728
416.2	-0.01365417		946.19	0.00125589		1476.19	0.02037675		2006.18	0.0201445		2536.18	0.00779016		3066.17	0.00939246		3596.17	0.00548837		4126.17	0.02127941
416.4	-0.01293265		946.39	0.00186802		1476.39	0.02065658		2006.38	0.02004759		2536.38	0.00793615		3066.37	0.00878009		3596.37	0.00499068		4126.37	0.02260707
416.6	-0.01273351		946.59	0.00141312		1476.59	0.02035482		2006.58	0.0203457		2536.58	0.00727721		3066.57	0.00847968		3596.57	0.00556479		4126.57	0.02423665
416.8	-0.01344997		946.79	0.00098335		1476.79	0.01984176		2006.78	0.01957289		2536.78	0.0073062		3066.77	0.00848103		3596.77	0.0057786		4126.77	0.02379769
417	-0.01373092		946.99	0.00078962		1476.99	0.01944333		2006.98	0.02013282		2536.98	0.00688258		3066.97	0.00889894		3596.97	0.00678081		4126.97	0.02539741
417.2	-0.01357968		947.19	0.00083149		1477.19	0.0190397		2007.18	0.01949857		2537.18	0.00773498		3067.17	0.00863162		3597.17	0.00708532		4127.17	0.02514698
417.4	-0.01365518		947.39	0.00139668		1477.39	0.01989586		2007.38	0.01981791		2537.38	0.00831167		3067.37	0.00811569		3597.37	0.00699883		4127.37	0.0255188
417.6	-0.01269842		947.59	0.00123459		1477.59	0.02004809		2007.58	0.01961278		2537.58	0.00840219		3067.57	0.00884619		3597.57	0.00714089		4127.57	0.02520149
417.8	-0.01272826		947.79	0.00182274		1477.79	0.01985467		2007.78	0.0193706		2537.78	0.00871907		3067.77	0.01019039		3597.77	0.00761325		4127.77	0.0253272
418	-0.01237621		947.99	0.00154673		1477.99	0.02018433		2007.98	0.01965718		2537.98	0.0089563		3067.97	0.01088937		3597.97	0.00788937		4127.97	0.02538684
418.2	-0.0126898		948.19	0.00161549		1478.19	0.01990655		2008.18	0.02050914		2538.18	0.00931267		3068.17	0.01014302		3598.17	0.00881702		4128.17	0.02597614
418.4	-0.01263724		948.39	0.00161308		1478.39	0.02005337		2008.38	0.02098265		2538.38	0.00847187		3068.37	0.01043152		3598.37	0.01006031		4128.37	0.02573202
418.6	-0.01285677		948.59	0.00119853		1478.59	0.02065578		2008.58	0.02205884		2538.58	0.00870839		3068.57	0.01080355		3598.57	0.01003781		4128.57	0.02509594
418.8	-0.01341695		948.79	0.00110853		1478.79	0.02091837		2008.78	0.02273377		2538.78	0.00777522		3068.77	0.01094395		3598.77	0.01042991		4128.77	0.02341775
419	-0.01385273		948.99	0.00102225		1478.99	0.02182241		2008.98	0.02312209		2538.98	0.00842356		3068.97	0.01032489		3598.97	0.01011719		4128.97	0.02340041
419.2	-0.0145413		949.19	0.00018526		1479.19	0.0217365		2009.18	0.02263712		2539.18	0.00885924		3069.17	0.01005439		3599.17	0.01032289		4129.17	0.02355192
419.4	-0.01607477		949.39	0.00050832		1479.39	0.02239014		2009.38	0.02157066		2539.38	0.00919998		3069.37	0.00891138		3599.37	0.01108658		4129.37	0.02301794
419.6	-0.01654489		949.59	0.00067213		1479.59	0.02291767		2009.58	0.021574		2539.58	0.01003698		3069.57	0.00797499		3599.57	0.01054457		4129.57	0.02315976
419.8	-0.01576131		949.79	0.00061067		1479.79	0.02307814		2009.78	0.02108591		2539.78	0.01014459		3069.77	0.00774282		3599.77	0.01020944		4129.77	0.02447813
420	-0.01579902		949.99	0.00102482		1479.99	0.0224789		2009.98	0.02060694		2539.98	0.01052014		3069.97	0.00688016		3599.97	0.00953525		4129.97	0.02441024
420.2	-0.01617671		950.19	0.00162217		1480.19	0.02258764		2010.18	0.02029176		2540.18	0.01045508		3070.17	0.00619924		3600.17	0.00959539		4130.17	0.02524205
420.4	-0.0159398		950.39	0.00191911		1480.39	0.02303511		2010.38	0.01915288		2540.38	0.01034666		3070.37	0.00631665		3600.37	0.0092657		4130.37	0.02597263
420.6	-0.01588647		950.59	0.00212203		1480.59	0.02243361		2010.58	0.01885826		2540.58	0.01037802		3070.57	0.00737992		3600.57	0.00813798		4130.57	0.02572469
420.8	-0.01604322		950.79	0.00296439		1480.79	0.02179326		2010.78	0.01814812		2540.78	0.01057671		3070.77	0.00784209		3600.77	0.00801601		4130.77	0.02604517
421	-0.01595926		950.99	0.00332382		1480.99	0.02126218		2010.98	0.01833963		2540.98	0.01041521		3070.97	0.0076616		3600.97	0.00696916		4130.97	0.02685895
421.2	-0.01521263		951.19	0.00349758		1481.19	0.02073374		2011.18	0.0183211		2541.18	0.01101032		3071.17	0.00756605		3601.17	0.00655439		4131.17	0.02638033
421.4	-0.01576395		951.39	0.00426108		1481.39	0.02009821		2011.38	0.01872057		2541.38	0.01078701		3071.37	0.0074912		3601.37	0.00568514		4131.37	0.02609478
421.6	-0.01510959		951.59	0.00498374		1481.59	0.01957504		2011.58	0.0182677		2541.58	0.0100861		3071.57	0.00846458		3601.57	0.00526301		4131.57	0.02542175
421.8	-0.01588628		951.79	0.00545717		1481.79	0.01873339		2011.78	0.01872323		2541.78	0.01090724		3071.77	0.00926877		3601.77	0.00450675		4131.77	0.02510203
422	-0.01622701		951.99	0.00483358		1481.99	0.01797834		2011.98	0.0189515		2541.98	0.01088863		3071.97	0.0093043		3601.97	0.00519095		4131.97	0.02502629
422.2	-0.01624171		952.19	0.00444442		1482.19	0.01808855		2012.18	0.01916241		2542.18	0.01097831		3072.17	0.00927222		3602.17	0.00569164		4132.17	0.02549288
422.4	-0.01622115		952.39	0.00408358		1482.39	0.0182964		2012.38	0.01900382		2542.38	0.01057633		3072.37	0.00991021		3602.37	0.00598302		4132.37	0.02494522
422.6	-0.01665954		952.59	0.00297245		1482.59	0.01992303		2012.58	0.01921119		2542.58	0.01112264		3072.57	0.01075551		3602.57	0.0062112		4132.57	0.0242326
422.8	-0.01750739		952.79	0.00214823		1482.79	0.02078262		2012.78	0.01909507		2542.78	0.01115665		3072.77	0.0110413		3602.77	0.00662066		4132.77	0.02405055
423	-0.01811101		952.99	0.00204333		1482.99	0.0213808		2012.98	0.01911515		2542.98	0.01166167		3072.97	0.01019222		3602.97	0.00699843		4132.97	0.02397994
423.2	-0.01860445		953.19	0.0020628		1483.19	0.02228206		2013.18	0.01906743		2543.18	0.01064147		3073.17	0.0095901		3603.17	0.00748309		4133.17	0.02311539
423.4	-0.01898564		953.39	0.00223238		1483.39	0.02226054		2013.38	0.0188291		2543.38	0.01072343		3073.37	0.00874415		3603.37	0.00776673		4133.37	0.02267952
423.6	-0.01843593		953.59	0.00254044		1483.59	0.02236234		2013.58	0.01834459		2543.58	0.01086103		3073.57	0.00908627		3603.57	0.00685666		4133.57	0.02346074
423.8	-0.01800956		953.79	0.00236729		1483.79	0.02213255		2013.78	0.01828817		2543.78	0.01028406		3073.77	0.00938169		3603.77	0.00766194		4133.77	0.02402903
424	-0.01853764		953.99	0.00249828		1483.99	0.02299322		2013.98	0.01923986		2543.98	0.0100895		3073.97	0.00950173		3603.97	0.00743514		4133.97	0.02392289
424.2	-0.0184019		954.19	0.00226475		1484.19	0.0231212		2014.18	0.01904685		2544.18	0.00990248		3074.17	0.00988957		3604.17	0.00760503		4134.17	0.02402668
424.4	-0.01794037		954.39	0.0021674		1484.39	0.02364034		2014.38	0.01933075		2544.38	0.00975608		3074.37	0.00934733		3604.37	0.00807295		4134.37	0.02433605
424.6	-0.0177648		954.59	0.00277637		1484.59	0.02232835		2014.58	0.01971421		2544.58	0.0100617		3074.57	0.01003125		3604.57	0.00726544		4134.57	0.02534186
424.8	-0.01742108		954.79	0.00284883		1484.79	0.02174541		2014.78	0.01925193		2544.78	0.01045768		3074.77	0.00882962		3604.77	0.00796435		4134.77	0.02619339
425	-0.01757799		954.99	0.00329934		1484.99	0.02091232		2014.98	0.01931624		2544.98	0.01098548		3074.97	0.00764104		3604.97	0.00685877		4134.97	0.02639
425.2	-0.01732504		955.19	0.00309581		1485.19	0.02063651		2015.18	0.01935948		2545.18	0.01085733		3075.17	0.00775788		3605.17	0.00748775		4135.17	0.0268453
425.4	-0.01755476		955.39	0.00336226		1485.39	0.02006612		2015.38	0.01950813		2545.38	0.01097076		3075.37	0.00758416		3605.37	0.00720976		4135.37	0.0265703
425.6	-0.01740247		955.59	0.00356621		1485.59	0.01996371		2015.58	0.01912104		2545.58	0.00999712		3075.57	0.00776926		3605.57	0.00706951		4135.57	0.0265348
425.8	-0.01745352		955.79	0.00329539		1485.79	0.01863772		2015.78	0.01972621		2545.78	0.01111463		3075.77	0.00831863		3605.77	0.00674859		4135.77	0.02563277
426	-0.01679079		955.99	0.00291366		1485.99	0.01910434		2015.98	0.01916559		2545.98	0.01026306		3075.97	0.00810041		3605.97	0.0078974		4135.97	0.02582597
426.2	-0.01589625		956.19	0.0030412		1486.19	0.0192622		2016.18	0.01899136		2546.18	0.01080306		3076.17	0.00786932		3606.17	0.00805063		4136.17	0.02570077
426.4	-0.01607183		956.39	0.00325452		1486.39	0.0200339		2016.38	0.01849484		2546.38	0.01086153		3076.37	0.00793998		3606.37	0.00880981		4136.37	0.0248727
426.6	-0.01657111		956.59	0.00250946		1486.59	0.02061227		2016.58	0.01909056		2546.58	0.01086474		3076.57	0.00935042		3606.57	0.00877567		4136.57	0.02481133
426.8	-0.01694101		956.79	0.00225275		1486.79	0.02041179		2016.78	0.0191001		2546.78	0.01127007		3076.77	0.00872986		3606.77	0.00898424		4136.77	0.0234937
427	-0.01657501		956.99	0.00260441		1486.99	0.0205863		2016.98	0.01964663		2546.98	0.01114486		3076.97	0.00848265		3606.97	0.0087099		4136.97	0.02270008
427.2	-0.01636353		957.19	0.00275149		1487.19	0.02029589		2017.18	0.01890105		2547.18	0.01014153		3077.17	0.00893465		3607.17	0.00949647		4137.17	0.02252888
427.4	-0.01642498		957.39	0.00311747		1487.39	0.01980627		2017.38	0.01841859		2547.38	0.01045694		3077.37	0.00963134		3607.37	0.00963881		4137.37	0.02173427
427.6	-0.01727023		957.59	0.0029262		1487.59	0.01977912		2017.58	0.01789684		2547.58	0.01069355		3077.57	0.01045294		3607.57	0.00970653		4137.57	0.02214821
427.8	-0.01754154		957.79	0.00268361		1487.79	0.02031289		2017.78	0.01810785		2547.78	0.00983444		3077.77	0.01052364		3607.77	0.01004324		4137.77	0.02257437
428	-0.01752083		957.99	0.00226706		1487.99	0.02040839		2017.98	0.01919344		2547.98	0.00893793		3077.97	0.01062768		3607.97	0.00998424		4137.97	0.02180703
428.2	-0.01756545		958.19	0.0028145		1488.19	0.01980923		2018.18	0.01863361		2548.18	0.00938996		3078.17	0.01034896		3608.17	0.01033078		4138.17	0.02062516
428.4	-0.01753127		958.39	0.00350974		1488.39	0.02018197		2018.38	0.01889669		2548.38	0.00948785		3078.37	0.00947352		3608.37	0.01008626		4138.37	0.02165049
428.6	-0.01760914		958.59	0.00398844		1488.59	0.01938771		2018.58	0.01799735		2548.58	0.00978414		3078.57	0.00986624		3608.57	0.00889839		4138.57	0.02230458
428.8	-0.01750089		958.79	0.00409857		1488.79	0.01890435		2018.78	0.01671482		2548.78	0.00960966		3078.77	0.00837756		3608.77	0.00890155		4138.77	0.0220279
429	-0.01770831		958.99	0.0045465		1488.99	0.01870266		2018.98	0.01668172		2548.98	0.00940433		3078.97	0.00836904		3608.97	0.00804222		4138.97	0.02296368
429.2	-0.01814025		959.19	0.00439849		1489.19	0.01896863		2019.18	0.01648984		2549.18	0.00854005		3079.17	0.00796974		3609.17	0.0083897		4139.17	0.02380642
429.4	-0.01835072		959.39	0.00501954		1489.39	0.01880437		2019.38	0.01667118		2549.38	0.0080879		3079.37	0.00720558		3609.37	0.00785122		4139.37	0.0239365
429.6	-0.01898881		959.59	0.00439517		1489.59	0.01851741		2019.58	0.0159369		2549.58	0.00664633		3079.57	0.00693787		3609.57	0.00730028		4139.57	0.02402161
429.8	-0.01939426		959.79	0.00461247		1489.79	0.01848582		2019.78	0.01583268		2549.78	0.0078696		3079.77	0.00629265		3609.77	0.00706891		4139.77	0.02490776
430	-0.01916171		959.99	0.00398841		1489.99	0.01910036		2019.98	0.01555871		2549.98	0.00663561		3079.97	0.005361		3609.97	0.00722363		4139.97	0.02535175
430.2	-0.01930288		960.19	0.00364384		1490.19	0.01823345		2020.18	0.01562061		2550.18	0.00630118		3080.17	0.0049626		3610.17	0.00723563		4140.17	0.02508553
430.4	-0.01893954		960.39	0.00301953		1490.39	0.01923049		2020.38	0.0155162		2550.38	0.00645763		3080.37	0.00478966		3610.37	0.0077207		4140.37	0.02507148
430.6	-0.01869249		960.59	0.00174995		1490.59	0.01926397		2020.58	0.01645765		2550.58	0.00707259		3080.57	0.00539141		3610.57	0.00787341		4140.57	0.02512471
430.8	-0.0179837		960.79	0.00146194		1490.79	0.01931628		2020.78	0.01605926		2550.78	0.00713479		3080.77	0.00471466		3610.77	0.00829015		4140.77	0.02459068
431	-0.01846003		960.99	0.00095542		1490.99	0.0190519		2020.98	0.01607201		2550.98	0.00652218		3080.97	0.00544684		3610.97	0.00868831		4140.97	0.025584
431.2	-0.0188703		961.19	0.00084558		1491.19	0.01858688		2021.18	0.01587361		2551.18	0.00585135		3081.17	0.00541883		3611.17	0.00939841		4141.17	0.02564507
431.4	-0.01952061		961.39	0.00069156		1491.39	0.01904575		2021.38	0.01650175		2551.38	0.00727704		3081.37	0.00560427		3611.37	0.00886378		4141.37	0.02434492
431.6	-0.01913129		961.59	-0.00001619		1491.59	0.01957828		2021.58	0.01635905		2551.58	0.00677643		3081.57	0.00608377		3611.57	0.00905016		4141.57	0.02508522
431.8	-0.01882557		961.79	0.00009219		1491.79	0.01968771		2021.78	0.01692135		2551.78	0.00603468		3081.77	0.00534431		3611.77	0.00908347		4141.77	0.02421656
432	-0.01838124		961.99	0.00026954		1491.99	0.01952964		2021.98	0.01732649		2551.98	0.0072398		3081.97	0.00477673		3611.97	0.00989444		4141.97	0.02290868
432.2	-0.01814913		962.19	0.00138231		1492.19	0.0193657		2022.18	0.01691634		2552.18	0.00805531		3082.17	0.00462562		3612.17	0.00926763		4142.17	0.02223859
432.4	-0.01747982		962.39	0.0015112		1492.39	0.01899983		2022.38	0.01674048		2552.38	0.00850963		3082.37	0.00436626		3612.37	0.00868831		4142.37	0.02244451
432.6	-0.01752343		962.59	0.00208282		1492.59	0.01874584		2022.58	0.01628971		2552.58	0.00874176		3082.57	0.00492345		3612.57	0.00925815		4142.57	0.02167348
432.8	-0.01742954		962.79	0.00190113		1492.79	0.019061		2022.78	0.01574644		2552.78	0.00849252		3082.77	0.00507866		3612.77	0.00951721		4142.77	0.02078483
433	-0.01784388		962.99	0.00185881		1492.99	0.01892413		2022.98	0.01679124		2552.98	0.00927265		3082.97	0.00562771		3612.97	0.00896516		4142.97	0.02110064
433.2	-0.01736051		963.19	0.00101063		1493.19	0.01871695		2023.18	0.01763106		2553.18	0.00918723		3083.17	0.00497663		3613.17	0.00833813		4143.17	0.02145651
433.4	-0.01766437		963.39	0.00035398		1493.39	0.01934577		2023.38	0.01804929		2553.38	0.00881246		3083.37	0.00509699		3613.37	0.00770148		4143.37	0.02070781
433.6	-0.01839691		963.59	-0.00024066		1493.59	0.01833549		2023.58	0.01722409		2553.58	0.00885546		3083.57	0.00589199		3613.57	0.00762762		4143.57	0.02132342
433.8	-0.01856292		963.79	0.00005842		1493.79	0.01851096		2023.78	0.01709887		2553.78	0.0091924		3083.77	0.00538741		3613.77	0.00788169		4143.77	0.0212561
434	-0.01811079		963.99	0.00023461		1493.99	0.01870062		2023.98	0.01730065		2553.98	0.00799751		3083.97	0.00578618		3613.97	0.00803033		4143.97	0.02005057
434.2	-0.01752929		964.19	0.0006624		1494.19	0.01830321		2024.18	0.0171792		2554.18	0.00759604		3084.17	0.00634577		3614.17	0.0083849		4144.17	0.02003311
434.4	-0.01665033		964.39	0.00038064		1494.39	0.01883037		2024.38	0.01702894		2554.38	0.00778037		3084.37	0.00698666		3614.37	0.00872414		4144.37	0.02049084
434.6	-0.01686058		964.59	0.00058939		1494.59	0.01858696		2024.58	0.01658346		2554.58	0.00793609		3084.57	0.00765933		3614.57	0.00818773		4144.57	0.02108116
434.8	-0.0175759		964.79	0.00086092		1494.79	0.01776181		2024.78	0.01538477		2554.78	0.00671934		3084.77	0.00763736		3614.77	0.00773827		4144.77	0.02177509
435	-0.01841886		964.99	0.00078701		1494.99	0.0174822		2024.98	0.01547481		2554.98	0.00689875		3084.97	0.00783722		3614.97	0.00774127		4144.97	0.02263368
435.2	-0.01893213		965.19	0.00106924		1495.19	0.01731522		2025.18	0.0151433		2555.18	0.00723122		3085.17	0.00717474		3615.17	0.00718272		4145.17	0.02254675
435.4	-0.01898235		965.39	0.00139577		1495.39	0.01744126		2025.38	0.01543451		2555.38	0.00777882		3085.37	0.00742566		3615.37	0.00681778		4145.37	0.02227202
435.6	-0.01869043		965.59	0.00186783		1495.59	0.01680603		2025.58	0.01524384		2555.58	0.00732339		3085.57	0.0072808		3615.57	0.00729328		4145.57	0.0232983
435.8	-0.0186287		965.79	0.00245035		1495.79	0.01589173		2025.78	0.015406		2555.78	0.00793923		3085.77	0.00710787		3615.77	0.00767988		4145.77	0.02278739
436	-0.01847083		965.99	0.00260315		1495.99	0.01678079		2025.98	0.01518867		2555.98	0.00874358		3085.97	0.00679931		3615.97	0.0082337		4145.97	0.02306519
436.2	-0.01887916		966.19	0.00360333		1496.19	0.01664385		2026.18	0.01538549		2556.18	0.00790729		3086.17	0.00734265		3616.17	0.00808371		4146.17	0.02341976
436.4	-0.01985055		966.39	0.00340413		1496.39	0.01686709		2026.38	0.01670664		2556.38	0.00729224		3086.37	0.007415		3616.37	0.00850566		4146.37	0.02318373
436.6	-0.02000239		966.59	0.00281484		1496.59	0.01721122		2026.58	0.01742477		2556.58	0.00666972		3086.57	0.00867434		3616.57	0.00809034		4146.57	0.02275146
436.8	-0.01996763		966.79	0.00147		1496.79	0.01690518		2026.78	0.01814672		2556.78	0.00643793		3086.77	0.00865386		3616.77	0.00769504		4146.77	0.02267161
437	-0.02021221		966.99	-0.0003755		1496.99	0.01599191		2026.98	0.01989895		2556.98	0.0064989		3086.97	0.00865935		3616.97	0.0072166		4146.97	0.02278688
437.2	-0.02014734		967.19	-0.00193681		1497.19	0.01587229		2027.18	0.02062487		2557.18	0.00576129		3087.17	0.00832874		3617.17	0.00671241		4147.17	0.02265421
437.4	-0.02068991		967.39	-0.00243432		1497.39	0.015948		2027.38	0.02083337		2557.38	0.00532718		3087.37	0.00869145		3617.37	0.00699432		4147.37	0.02083365
437.6	-0.02079564		967.59	-0.00221655		1497.59	0.01582349		2027.58	0.02058443		2557.58	0.00510511		3087.57	0.00965123		3617.57	0.00663136		4147.57	0.02003526
437.8	-0.02062589		967.79	-0.00241611		1497.79	0.01659328		2027.78	0.02101413		2557.78	0.00426072		3087.77	0.00911784		3617.77	0.00683591		4147.77	0.01975569
438	-0.0203741		967.99	-0.00248788		1497.99	0.01683957		2027.98	0.02122138		2557.98	0.00368491		3087.97	0.00954216		3617.97	0.00668008		4147.97	0.01900296
438.2	-0.02078634		968.19	-0.0031934		1498.19	0.01691322		2028.18	0.02109622		2558.18	0.00356971		3088.17	0.01018517		3618.17	0.00590528		4148.17	0.0185591
438.4	-0.02117336		968.39	-0.00310872		1498.39	0.01765841		2028.38	0.02133586		2558.38	0.00422251		3088.37	0.00979951		3618.37	0.00625205		4148.37	0.01839805
438.6	-0.02217388		968.59	-0.00217016		1498.59	0.01754688		2028.58	0.02073643		2558.58	0.00498343		3088.57	0.00932319		3618.57	0.00560996		4148.57	0.01848437
438.8	-0.02211428		968.79	-0.00237992		1498.79	0.01763945		2028.78	0.02006017		2558.78	0.00500864		3088.77	0.0090936		3618.77	0.00563935		4148.77	0.01827727
439	-0.02150047		968.99	-0.00165313		1498.99	0.01797607		2028.98	0.02040832		2558.98	0.00557837		3088.97	0.00828415		3618.97	0.00614115		4148.97	0.01817112
439.2	-0.02211382		969.19	-0.0010574		1499.19	0.01812892		2029.18	0.02018532		2559.18	0.00611769		3089.17	0.00703035		3619.17	0.00593961		4149.17	0.01751744
439.4	-0.02080881		969.39	-0.00006781		1499.39	0.01811046		2029.38	0.02021361		2559.38	0.00678091		3089.37	0.00707518		3619.37	0.0065734		4149.37	0.01780197
439.6	-0.02016153		969.59	0.00068967		1499.59	0.01768717		2029.58	0.01968467		2559.58	0.00669044		3089.57	0.00723476		3619.57	0.00697646		4149.57	0.01883322
439.8	-0.01876791		969.79	0.0008406		1499.79	0.01794139		2029.78	0.01889224		2559.78	0.00776947		3089.77	0.00683782		3619.77	0.00643463		4149.77	0.01913262
440	-0.01894947		969.99	0.00072813		1499.99	0.0188275		2029.98	0.0180191		2559.98	0.00736038		3089.97	0.00625016		3619.97	0.00679335		4149.97	0.01966558
440.2	-0.01916599		970.19	0.00111443		1500.19	0.01833887		2030.18	0.01781765		2560.18	0.0069676		3090.17	0.00601429		3620.17	0.00663794		4150.17	0.02086383
440.4	-0.01931977		970.39	0.00053636		1500.39	0.0179269		2030.38	0.01795452		2560.38	0.00663039		3090.37	0.00638414		3620.37	0.00645328		4150.37	0.02092278
440.6	-0.01817693		970.59	0.0000041		1500.59	0.0172152		2030.58	0.01659741		2560.58	0.00702285		3090.57	0.00660867		3620.57	0.00622474		4150.57	0.02123002
440.8	-0.01887047		970.79	-0.00011587		1500.79	0.01664286		2030.78	0.01603621		2560.78	0.00730635		3090.77	0.00599781		3620.77	0.00685876		4150.77	0.02233281
441	-0.01953921		970.99	-0.00030735		1500.99	0.01552925		2030.98	0.01591446		2560.98	0.00698155		3090.97	0.006165		3620.97	0.00672394		4150.97	0.0231807
441.2	-0.01968804		971.19	0.00045426		1501.19	0.01446334		2031.18	0.0164984		2561.18	0.00709164		3091.17	0.00608048		3621.17	0.00656659		4151.17	0.02290856
441.4	-0.02029642		971.39	0.00010414		1501.39	0.01413406		2031.38	0.01648227		2561.38	0.00710129		3091.37	0.00645677		3621.37	0.0067159		4151.37	0.02213703
441.6	-0.02068515		971.59	0.00014771		1501.59	0.01375568		2031.58	0.01698156		2561.58	0.00658283		3091.57	0.00675614		3621.57	0.00664543		4151.57	0.02311301
441.8	-0.02108755		971.79	-0.00032847		1501.79	0.01315472		2031.78	0.01679686		2561.78	0.00596124		3091.77	0.00649605		3621.77	0.00733262		4151.77	0.02446624
442	-0.02150207		971.99	-0.00084969		1501.99	0.01311808		2031.98	0.01708957		2561.98	0.00616669		3091.97	0.00632898		3621.97	0.00661589		4151.97	0.02372582
442.2	-0.02232361		972.19	-0.00090829		1502.19	0.01348504		2032.18	0.01762465		2562.18	0.00656527		3092.17	0.00678817		3622.17	0.00642134		4152.17	0.0244067
442.4	-0.02313602		972.39	-0.00016959		1502.39	0.0138625		2032.38	0.01813559		2562.38	0.00665546		3092.37	0.0063303		3622.37	0.00695913		4152.37	0.02401313
442.6	-0.02442053		972.59	-0.00055543		1502.59	0.01408734		2032.58	0.01813165		2562.58	0.00720789		3092.57	0.00664023		3622.57	0.00773402		4152.57	0.02384998
442.8	-0.02409863		972.79	-0.00138577		1502.79	0.01471205		2032.78	0.01797387		2562.78	0.00643861		3092.77	0.00700398		3622.77	0.00767771		4152.77	0.02315519
443	-0.02403759		972.99	-0.00109042		1502.99	0.01462605		2032.98	0.01829453		2562.98	0.00652769		3092.97	0.00686225		3622.97	0.00727201		4152.97	0.0228034
443.2	-0.02459148		973.19	-0.00170258		1503.19	0.01474398		2033.18	0.01805603		2563.18	0.00704623		3093.17	0.00642798		3623.17	0.00730731		4153.17	0.0223651
443.4	-0.02326738		973.39	-0.00173812		1503.39	0.01563221		2033.38	0.01777729		2563.38	0.00678432		3093.37	0.00714284		3623.37	0.00660868		4153.37	0.02253345
443.6	-0.02329472		973.59	-0.00205754		1503.59	0.01688375		2033.58	0.01748539		2563.58	0.00586596		3093.57	0.00761712		3623.57	0.00580607		4153.57	0.02269494
443.8	-0.0217826		973.79	-0.00260767		1503.79	0.01804815		2033.78	0.01606889		2563.78	0.00664087		3093.77	0.0068786		3623.77	0.00588767		4153.77	0.02243533
444	-0.02155362		973.99	-0.00294167		1503.99	0.01905494		2033.98	0.01536712		2563.98	0.00626138		3093.97	0.0070817		3623.97	0.00709849		4153.97	0.0224847
444.2	-0.02100875		974.19	-0.0030795		1504.19	0.01931566		2034.18	0.01487862		2564.18	0.00604405		3094.17	0.00713286		3624.17	0.00702344		4154.17	0.02253771
444.4	-0.0204259		974.39	-0.00250168		1504.39	0.01923681		2034.38	0.01411088		2564.38	0.00576362		3094.37	0.00745971		3624.37	0.00695816		4154.37	0.02173872
444.6	-0.02014051		974.59	-0.00244274		1504.59	0.01899626		2034.58	0.01371922		2564.58	0.00718215		3094.57	0.00759703		3624.57	0.0073142		4154.57	0.02191643
444.8	-0.02030153		974.79	-0.00237839		1504.79	0.01844158		2034.78	0.01338317		2564.78	0.00784611		3094.77	0.00700084		3624.77	0.00742448		4154.77	0.02288277
445	-0.02005155		974.99	-0.00141301		1504.99	0.01755419		2034.98	0.01354269		2564.98	0.00787046		3094.97	0.00684019		3624.97	0.00727015		4154.97	0.02344319
445.2	-0.02049333		975.19	-0.00120215		1505.19	0.01724591		2035.18	0.01406269		2565.18	0.00824672		3095.17	0.0070625		3625.17	0.00777108		4155.17	0.02306231
445.4	-0.02068737		975.39	-0.00240364		1505.39	0.0170428		2035.38	0.0139748		2565.38	0.00790171		3095.37	0.00728123		3625.37	0.00703619		4155.37	0.02363273
445.6	-0.01924795		975.59	-0.00244131		1505.59	0.01706397		2035.58	0.0142544		2565.58	0.00807447		3095.57	0.00709119		3625.57	0.00710939		4155.57	0.02523391
445.8	-0.01963316		975.79	-0.00297822		1505.79	0.01693748		2035.78	0.01396417		2565.78	0.00796632		3095.77	0.00641692		3625.77	0.00715572		4155.77	0.02559178
446	-0.0201698		975.99	-0.00281445		1505.99	0.01698134		2035.98	0.01467244		2565.98	0.00878098		3095.97	0.00596691		3625.97	0.00613978		4155.97	0.02511284
446.2	-0.02109125		976.19	-0.00301348		1506.19	0.01733343		2036.18	0.01521255		2566.18	0.00905803		3096.17	0.00591017		3626.17	0.00638792		4156.17	0.02580129
446.4	-0.02141422		976.39	-0.00281146		1506.39	0.01763539		2036.38	0.01596074		2566.38	0.00942211		3096.37	0.00585912		3626.37	0.00615604		4156.37	0.02440666
446.6	-0.02206866		976.59	-0.00286306		1506.59	0.01812325		2036.58	0.01707708		2566.58	0.00940246		3096.57	0.00592158		3626.57	0.0059475		4156.57	0.02447208
446.8	-0.02221615		976.79	-0.00327134		1506.79	0.01765754		2036.78	0.01734153		2566.78	0.00828025		3096.77	0.00546246		3626.77	0.00445149		4156.77	0.02408937
447	-0.02243488		976.99	-0.00277075		1506.99	0.01736291		2036.98	0.01777045		2566.98	0.00843233		3096.97	0.00480167		3626.97	0.00376133		4156.97	0.02400851
447.2	-0.02271819		977.19	-0.00298211		1507.19	0.01744999		2037.18	0.01830721		2567.18	0.00854878		3097.17	0.00387982		3627.17	0.00338543		4157.17	0.02308564
447.4	-0.02275368		977.39	-0.00320359		1507.39	0.01839616		2037.38	0.01857622		2567.38	0.00799999		3097.37	0.00341977		3627.37	0.00291571		4157.37	0.0219308
447.6	-0.02318374		977.59	-0.00329364		1507.59	0.01908832		2037.58	0.01828475		2567.58	0.0075332		3097.57	0.0038681		3627.57	0.00331257		4157.57	0.02170892
447.8	-0.02237023		977.79	-0.00355803		1507.79	0.01835063		2037.78	0.01810346		2567.78	0.00807737		3097.77	0.00331247		3627.77	0.00389822		4157.77	0.0215812
448	-0.02211023		977.99	-0.00375168		1507.99	0.01807422		2037.98	0.01863835		2567.98	0.00770101		3097.97	0.00374274		3627.97	0.00421375		4157.97	0.02092955
448.2	-0.02216372		978.19	-0.00425228		1508.19	0.01689448		2038.18	0.01851539		2568.18	0.00736472		3098.17	0.00374444		3628.17	0.0040903		4158.17	0.01960877
448.4	-0.02213163		978.39	-0.00341979		1508.39	0.01655908		2038.38	0.01831271		2568.38	0.00754354		3098.37	0.00437451		3628.37	0.00406		4158.37	0.01892553
448.6	-0.02253025		978.59	-0.00351131		1508.59	0.01612117		2038.58	0.01831125		2568.58	0.00850632		3098.57	0.0045237		3628.57	0.00512547		4158.57	0.01872477
448.8	-0.02274562		978.79	-0.0031141		1508.79	0.01507293		2038.78	0.01782949		2568.78	0.00820989		3098.77	0.00426126		3628.77	0.00525255		4158.77	0.01934433
449	-0.02278018		978.99	-0.00261114		1508.99	0.01498068		2038.98	0.01803381		2568.98	0.00737084		3098.97	0.00486672		3628.97	0.005536		4158.97	0.01952636
449.2	-0.02286293		979.19	-0.0022846		1509.19	0.01534759		2039.18	0.01754904		2569.18	0.00722518		3099.17	0.00601452		3629.17	0.00563234		4159.17	0.01992369
449.4	-0.02229428		979.39	-0.00276343		1509.39	0.01599319		2039.38	0.01709436		2569.38	0.00676018		3099.37	0.00603565		3629.37	0.00480989		4159.37	0.02128676
449.6	-0.02175476		979.59	-0.00304556		1509.59	0.01667058		2039.58	0.01677253		2569.58	0.00783923		3099.57	0.00600688		3629.57	0.00573746		4159.57	0.02178327
449.8	-0.0228099		979.79	-0.0025417		1509.79	0.01669455		2039.78	0.01710204		2569.78	0.00865275		3099.77	0.00655446		3629.77	0.00557429		4159.77	0.02179287
450	-0.02241271		979.99	-0.00196784		1509.99	0.01718141		2039.98	0.01714833		2569.98	0.00973706		3099.97	0.00678281		3629.97	0.00461691		4159.97	0.02216452
450.2	-0.02167423		980.19	-0.00247442		1510.19	0.01820739		2040.18	0.01771209		2570.18	0.00975544		3100.17	0.00683547		3630.17	0.00478208		4160.17	0.02224009
450.4	-0.02111405		980.39	-0.00208445		1510.39	0.0192124		2040.38	0.01804822		2570.38	0.0098615		3100.37	0.00760153		3630.37	0.00438627		4160.37	0.02171442
450.6	-0.02136852		980.59	-0.00146862		1510.59	0.01877019		2040.58	0.01826915		2570.58	0.00900513		3100.57	0.0071619		3630.57	0.00437951		4160.57	0.02261627
450.8	-0.02140289		980.79	-0.00233936		1510.79	0.01926481		2040.78	0.01723617		2570.78	0.00973012		3100.77	0.0068308		3630.77	0.00430414		4160.77	0.02169969
451	-0.02122733		980.99	-0.00229572		1510.99	0.01976999		2040.98	0.01723048		2570.98	0.01004123		3100.97	0.0068666		3630.97	0.00329202		4160.97	0.0214959
451.2	-0.02096053		981.19	-0.00285835		1511.19	0.01980213		2041.18	0.01732314		2571.18	0.01009399		3101.17	0.00709988		3631.17	0.00207082		4161.17	0.02043431
451.4	-0.02112573		981.39	-0.00331603		1511.39	0.0199201		2041.38	0.01710935		2571.38	0.01022275		3101.37	0.00772463		3631.37	0.00227756		4161.37	0.0201778
451.6	-0.02210628		981.59	-0.00356127		1511.59	0.0189346		2041.58	0.01643945		2571.58	0.00969341		3101.57	0.00888419		3631.57	0.00213251		4161.57	0.02047532
451.8	-0.02187907		981.79	-0.00370935		1511.79	0.0175685		2041.78	0.01666211		2571.78	0.00931693		3101.77	0.00870163		3631.77	0.00186982		4161.77	0.02017154
452	-0.02161592		981.99	-0.0039835		1511.99	0.01686185		2041.98	0.01620733		2571.98	0.00842633		3101.97	0.00899207		3631.97	0.00177901		4161.97	0.01934901
452.2	-0.02183185		982.19	-0.00396659		1512.19	0.01580912		2042.18	0.01533548		2572.18	0.00782285		3102.17	0.00912332		3632.17	0.00200645		4162.17	0.01993597
452.4	-0.02155038		982.39	-0.00363248		1512.39	0.01507812		2042.38	0.01470903		2572.38	0.00715353		3102.37	0.00947123		3632.37	0.00222937		4162.37	0.01993431
452.6	-0.02244872		982.59	-0.00465476		1512.59	0.01421676		2042.58	0.0135669		2572.58	0.00627967		3102.57	0.00839529		3632.57	0.00282031		4162.57	0.02026229
452.8	-0.02241184		982.79	-0.00463796		1512.79	0.01291642		2042.78	0.01333631		2572.78	0.00546196		3102.77	0.00740113		3632.77	0.00248966		4162.77	0.02097528
453	-0.02297766		982.99	-0.00481641		1512.99	0.0135752		2042.98	0.01316099		2572.98	0.00388966		3102.97	0.00691292		3632.97	0.00272507		4162.97	0.02145392
453.2	-0.02336706		983.19	-0.00407603		1513.19	0.01399303		2043.18	0.01230448		2573.18	0.00344543		3103.17	0.00618104		3633.17	0.00274835		4163.17	0.0227359
453.4	-0.02357165		983.39	-0.0051482		1513.39	0.01429725		2043.38	0.01222231		2573.38	0.00407543		3103.37	0.00553986		3633.37	0.00301255		4163.37	0.0234525
453.6	-0.02368859		983.59	-0.00489517		1513.59	0.01375867		2043.58	0.01248635		2573.58	0.00482881		3103.57	0.00567907		3633.57	0.00365143		4163.57	0.02370391
453.8	-0.02408325		983.79	-0.00517495		1513.79	0.0137033		2043.78	0.012809		2573.78	0.0057565		3103.77	0.00591424		3633.77	0.00322023		4163.77	0.02453132
454	-0.02422852		983.99	-0.00553589		1513.99	0.01383102		2043.98	0.01296986		2573.98	0.00499654		3103.97	0.00567047		3633.97	0.00381042		4163.97	0.02471165
454.2	-0.02474007		984.19	-0.00485238		1514.19	0.01430035		2044.18	0.01392243		2574.18	0.00480841		3104.17	0.0056997		3634.17	0.00468514		4164.17	0.02415383
454.4	-0.02490156		984.39	-0.00406605		1514.39	0.01465078		2044.38	0.01500465		2574.38	0.00494186		3104.37	0.00619533		3634.37	0.00528802		4164.37	0.02415359
454.6	-0.0243765		984.59	-0.00360055		1514.59	0.01406972		2044.58	0.0149506		2574.58	0.0052608		3104.57	0.00542491		3634.57	0.00548014		4164.57	0.02345232
454.8	-0.02495093		984.79	-0.00407072		1514.79	0.01619129		2044.78	0.0145731		2574.78	0.00718483		3104.77	0.00568627		3634.77	0.00487469		4164.77	0.02176876
455	-0.02435665		984.99	-0.00392702		1514.99	0.01663378		2044.98	0.01505421		2574.98	0.00731379		3104.97	0.00590559		3634.97	0.00426631		4164.97	0.02135976
455.2	-0.02469147		985.19	-0.00347152		1515.19	0.01698427		2045.18	0.01494136		2575.18	0.00765565		3105.17	0.00669642		3635.17	0.00443193		4165.17	0.02057864
455.4	-0.02471076		985.39	-0.00325306		1515.39	0.01685748		2045.38	0.01496051		2575.38	0.00818363		3105.37	0.00672435		3635.37	0.00533431		4165.37	0.02030947
455.6	-0.02520485		985.59	-0.00183754		1515.59	0.01593188		2045.58	0.01480785		2575.58	0.00827187		3105.57	0.00697405		3635.57	0.00569187		4165.57	0.01962728
455.8	-0.02394491		985.79	-0.00112521		1515.79	0.01601204		2045.78	0.01489373		2575.78	0.00782344		3105.77	0.00710007		3635.77	0.00630707		4165.77	0.01925098
456	-0.02349817		985.99	-0.00071603		1515.99	0.01601144		2045.98	0.01429485		2575.98	0.00786053		3105.97	0.00744451		3635.97	0.00643558		4165.97	0.01873078
456.2	-0.02335498		986.19	-0.00013836		1516.19	0.01605939		2046.18	0.01374162		2576.18	0.00803284		3106.17	0.00769102		3636.17	0.00662553		4166.17	0.01903416
456.4	-0.02328517		986.39	-0.00113119		1516.39	0.01608712		2046.38	0.01284989		2576.38	0.00719262		3106.37	0.0067197		3636.37	0.00607132		4166.37	0.01870687
456.6	-0.0235977		986.59	-0.00171526		1516.59	0.0163546		2046.58	0.01230016		2576.58	0.00646202		3106.57	0.0054826		3636.57	0.0054095		4166.57	0.01920487
456.8	-0.02271116		986.79	-0.00218844		1516.79	0.01611673		2046.78	0.01328591		2576.78	0.00624707		3106.77	0.00478875		3636.77	0.00495407		4166.77	0.01909618
457	-0.02331307		986.99	-0.00291399		1516.99	0.0169163		2046.98	0.01295583		2576.98	0.0055024		3106.97	0.00428202		3636.97	0.00538842		4166.97	0.01919594
457.2	-0.02440895		987.19	-0.00298984		1517.19	0.01696088		2047.18	0.01361911		2577.18	0.0052295		3107.17	0.00436114		3637.17	0.00552356		4167.17	0.02009668
457.4	-0.02407097		987.39	-0.00430266		1517.39	0.01707151		2047.38	0.0141532		2577.38	0.00607503		3107.37	0.0049971		3637.37	0.00581902		4167.37	0.02008164
457.6	-0.02492771		987.59	-0.00473014		1517.59	0.01660783		2047.58	0.01501663		2577.58	0.00552221		3107.57	0.00551644		3637.57	0.00504697		4167.57	0.02031923
457.8	-0.0258656		987.79	-0.006822		1517.79	0.01601621		2047.78	0.01505241		2577.78	0.00592782		3107.77	0.00628181		3637.77	0.00452454		4167.77	0.02020889
458	-0.02609511		987.99	-0.00687969		1517.99	0.01600202		2047.98	0.01526175		2577.98	0.00535365		3107.97	0.00587816		3637.97	0.00427454		4167.97	0.0197095
458.2	-0.02604016		988.19	-0.00693353		1518.19	0.01611482		2048.18	0.01568601		2578.18	0.00602607		3108.17	0.00553349		3638.17	0.00430523		4168.17	0.01910583
458.4	-0.02618383		988.39	-0.00691245		1518.39	0.01593633		2048.38	0.01623948		2578.38	0.00701444		3108.37	0.00587299		3638.37	0.0036462		4168.37	0.0193738
458.6	-0.02607793		988.59	-0.00656571		1518.59	0.01550827		2048.58	0.01513727		2578.58	0.0081185		3108.57	0.00565246		3638.57	0.00351173		4168.57	0.01902798
458.8	-0.02606182		988.79	-0.00694114		1518.79	0.01629996		2048.78	0.01425407		2578.78	0.00885045		3108.77	0.00615582		3638.77	0.00301623		4168.77	0.01838275
459	-0.02513754		988.99	-0.00710306		1518.99	0.01578785		2048.98	0.01417529		2578.98	0.00863316		3108.97	0.00621529		3638.97	0.00377859		4168.97	0.01835274
459.2	-0.02535854		989.19	-0.00650846		1519.19	0.01580845		2049.18	0.01415959		2579.18	0.00927154		3109.17	0.00620868		3639.17	0.00381027		4169.17	0.01835394
459.4	-0.02445703		989.39	-0.00600805		1519.39	0.01494922		2049.38	0.01411889		2579.38	0.00929029		3109.37	0.00529924		3639.37	0.00504505		4169.37	0.01793146
459.6	-0.0245949		989.59	-0.00451939		1519.59	0.01411889		2049.58	0.01421634		2579.58	0.00897259		3109.57	0.0053689		3639.57	0.00565046		4169.57	0.01807813
459.8	-0.02412868		989.79	-0.00382761		1519.79	0.01464022		2049.78	0.01415066		2579.78	0.0077845		3109.77	0.00540034		3639.77	0.00626901		4169.77	0.01807156
460	-0.02361359		989.99	-0.00303065		1519.99	0.01466981		2049.98	0.01377863		2579.98	0.00756811		3109.97	0.00482636		3639.97	0.00563921		4169.97	0.0184595
460.2	-0.02315199		990.19	-0.00236761		1520.19	0.01432797		2050.18	0.01399602		2580.18	0.00621339		3110.17	0.00423887		3640.17	0.00570418		4170.17	0.01916556
460.4	-0.02300339		990.39	-0.00209103		1520.39	0.01450404		2050.38	0.01420815		2580.38	0.00476914		3110.37	0.00341828		3640.37	0.00554845		4170.37	0.01967896
460.6	-0.02261422		990.59	-0.00194577		1520.59	0.01404809		2050.58	0.01515866		2580.58	0.0043967		3110.57	0.00360361		3640.57	0.00558786		4170.57	0.01968655
460.8	-0.0221173		990.79	-0.001285		1520.79	0.01382603		2050.78	0.01613094		2580.78	0.00374605		3110.77	0.00349812		3640.77	0.00571542		4170.77	0.01970376
461	-0.02285344		990.99	-0.0015013		1520.99	0.01431988		2050.98	0.01566888		2580.98	0.00264165		3110.97	0.00383511		3640.97	0.00600819		4170.97	0.01975473
461.2	-0.02328676		991.19	-0.00195823		1521.19	0.01452743		2051.18	0.01618315		2581.18	0.00258272		3111.17	0.00469577		3641.17	0.00568295		4171.17	0.01965627
461.4	-0.02240971		991.39	-0.00280883		1521.39	0.0147916		2051.38	0.0154055		2581.38	0.00315336		3111.37	0.00487071		3641.37	0.00575523		4171.37	0.01916533
461.6	-0.02310045		991.59	-0.00325404		1521.59	0.01351721		2051.58	0.0146322		2581.58	0.00319067		3111.57	0.00424749		3641.57	0.00458911		4171.57	0.01940645
461.8	-0.02269763		991.79	-0.00434917		1521.79	0.01362824		2051.78	0.01359499		2581.78	0.00286532		3111.77	0.00460675		3641.77	0.00410225		4171.77	0.02008448
462	-0.02228376		991.99	-0.00373411		1521.99	0.01465326		2051.98	0.01354975		2581.98	0.00352618		3111.97	0.00404201		3641.97	0.00405628		4171.97	0.02003306
462.2	-0.02304929		992.19	-0.00436202		1522.19	0.01529107		2052.18	0.01366744		2582.18	0.00428072		3112.17	0.00468522		3642.17	0.00427877		4172.17	0.02012189
462.4	-0.02398834		992.39	-0.00416066		1522.39	0.01463392		2052.38	0.01392594		2582.38	0.00558575		3112.37	0.00512495		3642.37	0.00404151		4172.37	0.02077124
462.6	-0.02398335		992.59	-0.00454974		1522.59	0.01492558		2052.58	0.01293022		2582.58	0.00544583		3112.57	0.00557394		3642.57	0.00437241		4172.57	0.02058119
462.8	-0.0237077		992.79	-0.00531542		1522.79	0.01518789		2052.78	0.01287099		2582.78	0.00555013		3112.77	0.00607208		3642.77	0.0042671		4172.77	0.0198902
463	-0.02416886		992.99	-0.00521768		1522.99	0.01541816		2052.98	0.0130382		2582.98	0.00562125		3112.97	0.00559788		3642.97	0.00465426		4172.97	0.01997623
463.2	-0.0241288		993.19	-0.00516836		1523.19	0.01472716		2053.18	0.01381503		2583.18	0.00634556		3113.17	0.00545201		3643.17	0.00456389		4173.17	0.01984522
463.4	-0.02377551		993.39	-0.00605588		1523.39	0.01496386		2053.38	0.01436266		2583.38	0.00635972		3113.37	0.00517622		3643.37	0.00499567		4173.37	0.01987451
463.6	-0.02448436		993.59	-0.00581079		1523.59	0.01536372		2053.58	0.01463033		2583.58	0.00586855		3113.57	0.00493112		3643.57	0.00474091		4173.57	0.02046572
463.8	-0.02402017		993.79	-0.00479385		1523.79	0.01599715		2053.78	0.01503238		2583.78	0.00635235		3113.77	0.00526209		3643.77	0.00479496		4173.77	0.02060239
464	-0.02402107		993.99	-0.00437142		1523.99	0.01497453		2053.98	0.01560167		2583.98	0.00656604		3113.97	0.00564078		3643.97	0.00437595		4173.97	0.02083098
464.2	-0.02376765		994.19	-0.00306755		1524.19	0.01492022		2054.18	0.01581804		2584.18	0.00651846		3114.17	0.00566365		3644.17	0.00441711		4174.17	0.02059511
464.4	-0.02392622		994.39	-0.00288109		1524.39	0.01488789		2054.38	0.01605287		2584.38	0.00649904		3114.37	0.00588763		3644.37	0.0045385		4174.37	0.02043208
464.6	-0.02378443		994.59	-0.00266671		1524.59	0.01458721		2054.58	0.01608951		2584.58	0.00735555		3114.57	0.00576221		3644.57	0.00515762		4174.57	0.02028221
464.8	-0.02324413		994.79	-0.00268184		1524.79	0.01469986		2054.78	0.01574605		2584.78	0.00686716		3114.77	0.00585689		3644.77	0.00551021		4174.77	0.02004526
465	-0.02223917		994.99	-0.00394258		1524.99	0.01517445		2054.98	0.01475973		2584.98	0.00729425		3114.97	0.00543244		3644.97	0.00508575		4174.97	0.019382
465.2	-0.02102618		995.19	-0.00386656		1525.19	0.01458306		2055.18	0.01445185		2585.18	0.00750106		3115.17	0.00571517		3645.17	0.00468905		4175.17	0.01922041
465.4	-0.02055242		995.39	-0.00249579		1525.39	0.01439469		2055.38	0.0148476		2585.38	0.00736048		3115.37	0.00447935		3645.37	0.00506129		4175.37	0.0195349
465.6	-0.02048762		995.59	-0.00205138		1525.59	0.01356957		2055.58	0.0151177		2585.58	0.00659597		3115.57	0.00336791		3645.57	0.00475783		4175.57	0.01930107
465.8	-0.0207094		995.79	-0.00234025		1525.79	0.01461782		2055.78	0.01452414		2585.78	0.0062901		3115.77	0.00347682		3645.77	0.00500067		4175.77	0.01915393
466	-0.02163619		995.99	-0.00255695		1525.99	0.01471012		2055.98	0.01434086		2585.98	0.00708376		3115.97	0.00331713		3645.97	0.00532069		4175.97	0.01835153
466.2	-0.02235326		996.19	-0.00401179		1526.19	0.01450252		2056.18	0.0142821		2586.18	0.0063966		3116.17	0.00394699		3646.17	0.00507594		4176.17	0.01792953
466.4	-0.02288034		996.39	-0.00425843		1526.39	0.01407617		2056.38	0.01424183		2586.38	0.00650324		3116.37	0.00366693		3646.37	0.0060572		4176.37	0.01768867
466.6	-0.02337238		996.59	-0.00489403		1526.59	0.0143172		2056.58	0.01404412		2586.58	0.00617231		3116.57	0.00444878		3646.57	0.00547853		4176.57	0.01729677
466.8	-0.02350016		996.79	-0.0052796		1526.79	0.01398		2056.78	0.01443855		2586.78	0.00643514		3116.77	0.00518873		3646.77	0.00534228		4176.77	0.01741383
467	-0.02339711		996.99	-0.00599106		1526.99	0.01367936		2056.98	0.01454952		2586.98	0.00565528		3116.97	0.00513989		3646.97	0.00464488		4176.97	0.01703515
467.2	-0.02373812		997.19	-0.0074033		1527.19	0.01364171		2057.18	0.01561219		2587.18	0.00549534		3117.17	0.00533784		3647.17	0.00461476		4177.17	0.01695925
467.4	-0.02452987		997.39	-0.00872025		1527.39	0.01406074		2057.38	0.01557348		2587.38	0.00582318		3117.37	0.00516498		3647.37	0.0045365		4177.37	0.01791555
467.6	-0.02554839		997.59	-0.00892473		1527.59	0.01329744		2057.58	0.01491535		2587.58	0.00553173		3117.57	0.00533173		3647.57	0.00525229		4177.57	0.0181327
467.8	-0.02551227		997.79	-0.00911927		1527.79	0.01257032		2057.78	0.01530333		2587.78	0.00572626		3117.77	0.00650786		3647.77	0.00520269		4177.77	0.01785264
468	-0.02569566		997.99	-0.00921788		1527.99	0.01208697		2057.98	0.0151982		2587.98	0.00548891		3117.97	0.00632628		3647.97	0.00428946		4177.97	0.0173181
468.2	-0.02543852		998.19	-0.00851692		1528.19	0.01235556		2058.18	0.01487004		2588.18	0.00502044		3118.17	0.00537683		3648.17	0.00426164		4178.17	0.01770381
468.4	-0.02542412		998.39	-0.0092107		1528.39	0.01180343		2058.38	0.01503877		2588.38	0.00437895		3118.37	0.00547523		3648.37	0.00456221		4178.37	0.01781548
468.6	-0.02486264		998.59	-0.00841613		1528.59	0.0121511		2058.58	0.015642		2588.58	0.00569065		3118.57	0.00482708		3648.57	0.00463503		4178.57	0.01761984
468.8	-0.02325456		998.79	-0.00780186		1528.79	0.0120496		2058.78	0.01563888		2588.78	0.00481029		3118.77	0.00475427		3648.77	0.00404331		4178.77	0.01738713
469	-0.02242211		998.99	-0.00701937		1528.99	0.01204001		2058.98	0.01545823		2588.98	0.00540815		3118.97	0.00437542		3648.97	0.00289713		4178.97	0.01758768
469.2	-0.0226423		999.19	-0.00535186		1529.19	0.01221638		2059.18	0.01528536		2589.18	0.00483374		3119.17	0.00455688		3649.17	0.00289983		4179.17	0.01836097
469.4	-0.02325469		999.39	-0.00401154		1529.39	0.01244915		2059.38	0.01548991		2589.38	0.00497278		3119.37	0.00392218		3649.37	0.00308181		4179.37	0.01837401
469.6	-0.02361129		999.59	-0.00343825		1529.59	0.01199734		2059.58	0.01422962		2589.58	0.00470339		3119.57	0.00414385		3649.57	0.00392045		4179.57	0.01820317
469.8	-0.02356446		999.79	-0.00334472		1529.79	0.01176271		2059.78	0.01263853		2589.78	0.00526614		3119.77	0.00412101		3649.77	0.00437534		4179.77	0.01818
470	-0.02318095		999.99	-0.00336366		1529.99	0.01120636		2059.98	0.01209985		2589.98	0.00532112		3119.97	0.00445892		3649.97	0.00421024		4179.97	0.01865322
470.2	-0.02336594		1000.19	-0.00321698		1530.19	0.01105039		2060.18	0.01174028		2590.18	0.00517253		3120.17	0.00454029		3650.17	0.00484728		4180.17	0.0185468
470.4	-0.02418021		1000.39	-0.00294098		1530.39	0.01126807		2060.38	0.01174723		2590.38	0.00545463		3120.37	0.00457691		3650.37	0.00559745		4180.37	0.01820263
470.6	-0.02456164		1000.59	-0.00253128		1530.59	0.01170984		2060.58	0.01147876		2590.58	0.00551538		3120.57	0.00525116		3650.57	0.00479231		4180.57	0.01809207
470.8	-0.02361256		1000.79	-0.00242876		1530.79	0.01207097		2060.78	0.01143791		2590.78	0.00543411		3120.77	0.00591006		3650.77	0.00569512		4180.77	0.01796725
471	-0.02371244		1000.99	-0.00270157		1530.99	0.01232431		2060.98	0.01131931		2590.98	0.00403025		3120.97	0.00568197		3650.97	0.00582118		4180.97	0.01686555
471.2	-0.02462036		1001.19	-0.00417224		1531.19	0.01267577		2061.18	0.01173105		2591.18	0.00404899		3121.17	0.00535752		3651.17	0.0065615		4181.17	0.01782066
471.4	-0.02466514		1001.39	-0.00446771		1531.39	0.01280354		2061.38	0.01172734		2591.38	0.00521386		3121.37	0.00533393		3651.37	0.00670842		4181.37	0.0173932
471.6	-0.02463615		1001.59	-0.00533275		1531.59	0.01322738		2061.58	0.01155965		2591.58	0.00490026		3121.57	0.0056129		3651.57	0.006782		4181.57	0.01652814
471.8	-0.02449369		1001.79	-0.00529422		1531.79	0.01329866		2061.78	0.01178297		2591.78	0.00350714		3121.77	0.00509081		3651.77	0.00634496		4181.77	0.01627082
472	-0.02476189		1001.99	-0.00471128		1531.99	0.01442466		2061.98	0.01131104		2591.98	0.00382367		3121.97	0.00441597		3651.97	0.00516252		4181.97	0.01662314
472.2	-0.02459367		1002.19	-0.00457295		1532.19	0.01410334		2062.18	0.01222127		2592.18	0.00354407		3122.17	0.00492776		3652.17	0.00489542		4182.17	0.0175657
472.4	-0.02436244		1002.39	-0.00548348		1532.39	0.01345692		2062.38	0.01249994		2592.38	0.00357226		3122.37	0.00565648		3652.37	0.0040898		4182.37	0.01794623
472.6	-0.02384938		1002.59	-0.00542679		1532.59	0.01372514		2062.58	0.01324935		2592.58	0.00449863		3122.57	0.00552447		3652.57	0.00309861		4182.57	0.01794193
472.8	-0.02332146		1002.79	-0.0048708		1532.79	0.0131532		2062.78	0.01294249		2592.78	0.00394554		3122.77	0.00525292		3652.77	0.00295212		4182.77	0.01821813
473	-0.02358406		1002.99	-0.00546692		1532.99	0.01277842		2062.98	0.01285694		2592.98	0.00468679		3122.97	0.00531915		3652.97	0.00250392		4182.97	0.01863844
473.2	-0.02402709		1003.19	-0.00524367		1533.19	0.01305791		2063.18	0.01261755		2593.18	0.00501437		3123.17	0.00578114		3653.17	0.00294801		4183.17	0.0191707
473.4	-0.02418372		1003.39	-0.00573616		1533.39	0.01204059		2063.38	0.01296556		2593.38	0.00600469		3123.37	0.00671828		3653.37	0.00309397		4183.37	0.01945714
473.6	-0.0242998		1003.59	-0.00574692		1533.59	0.01146278		2063.58	0.01260824		2593.58	0.00656108		3123.57	0.00634337		3653.57	0.00403082		4183.57	0.0194384
473.8	-0.02452721		1003.79	-0.00560296		1533.79	0.0110623		2063.78	0.01278141		2593.78	0.007275		3123.77	0.00554889		3653.77	0.00415366		4183.77	0.01919114
474	-0.02510911		1003.99	-0.00506805		1533.99	0.01125489		2063.98	0.01307512		2593.98	0.00756897		3123.97	0.00619289		3653.97	0.00476528		4183.97	0.01929154
474.2	-0.02581341		1004.19	-0.0051982		1534.19	0.01197087		2064.18	0.01280872		2594.18	0.00697476		3124.17	0.00625038		3654.17	0.00571507		4184.17	0.01840041
474.4	-0.02653515		1004.39	-0.00531942		1534.39	0.01244978		2064.38	0.01332781		2594.38	0.00662758		3124.37	0.00610403		3654.37	0.00537779		4184.37	0.0179096
474.6	-0.02659227		1004.59	-0.00462405		1534.59	0.01284061		2064.58	0.01358573		2594.58	0.00706196		3124.57	0.00659923		3654.57	0.00575456		4184.57	0.01742405
474.8	-0.0264066		1004.79	-0.0051148		1534.79	0.01373533		2064.78	0.01434071		2594.78	0.00628305		3124.77	0.00666248		3654.77	0.005887		4184.77	0.01657095
475	-0.02644326		1004.99	-0.00552884		1534.99	0.01451379		2064.98	0.01474171		2594.98	0.00627031		3124.97	0.00662358		3654.97	0.00486713		4184.97	0.0164197
475.2	-0.02615665		1005.19	-0.00646915		1535.19	0.01486014		2065.18	0.01537544		2595.18	0.00618567		3125.17	0.00631462		3655.17	0.00491109		4185.17	0.01723416
475.4	-0.02538521		1005.39	-0.00597046		1535.39	0.01558779		2065.38	0.01578994		2595.38	0.00697338		3125.37	0.00576059		3655.37	0.00476424		4185.37	0.01627986
475.6	-0.02551742		1005.59	-0.00633643		1535.59	0.01514033		2065.58	0.01531579		2595.58	0.00597899		3125.57	0.00490673		3655.57	0.00445833		4185.57	0.01690389
475.8	-0.02533495		1005.79	-0.00582849		1535.79	0.01419538		2065.78	0.01497401		2595.78	0.00566356		3125.77	0.00435375		3655.77	0.00378582		4185.77	0.0175787
476	-0.02531936		1005.99	-0.00528745		1535.99	0.01410593		2065.98	0.01491656		2595.98	0.00602028		3125.97	0.00498472		3655.97	0.00297171		4185.97	0.01827347
476.2	-0.02412469		1006.19	-0.00509836		1536.19	0.0133874		2066.18	0.015338		2596.18	0.00603758		3126.17	0.00502442		3656.17	0.0025246		4186.17	0.01866632
476.4	-0.02433639		1006.39	-0.00546563		1536.39	0.01203545		2066.38	0.01449798		2596.38	0.0052786		3126.37	0.00484091		3656.37	0.00171412		4186.37	0.01908183
476.6	-0.0239799		1006.59	-0.0060069		1536.59	0.01126557		2066.58	0.01374922		2596.58	0.00496318		3126.57	0.00357052		3656.57	0.00200085		4186.57	0.01873809
476.8	-0.0233509		1006.79	-0.0047497		1536.79	0.01031604		2066.78	0.01257344		2596.78	0.00500113		3126.77	0.00272872		3656.77	0.00240219		4186.77	0.01853725
477	-0.02381004		1006.99	-0.00566529		1536.99	0.00941278		2066.98	0.01263348		2596.98	0.00469647		3126.97	0.00255964		3656.97	0.00206401		4186.97	0.01886913
477.2	-0.02413561		1007.19	-0.00603483		1537.19	0.00945721		2067.18	0.01191143		2597.18	0.00485203		3127.17	0.00270719		3657.17	0.00226293		4187.17	0.01862853
477.4	-0.02422321		1007.39	-0.00596853		1537.39	0.00934447		2067.38	0.01194451		2597.38	0.0045923		3127.37	0.00204913		3657.37	0.00210646		4187.37	0.01862833
477.6	-0.024588		1007.59	-0.00641638		1537.59	0.00998655		2067.58	0.01224702		2597.58	0.00475101		3127.57	0.00164277		3657.57	0.00275114		4187.57	0.01917797
477.8	-0.02478583		1007.79	-0.00594195		1537.79	0.00995309		2067.78	0.01240428		2597.78	0.00477309		3127.77	0.00212559		3657.77	0.00381828		4187.77	0.01881559
478	-0.02464626		1007.99	-0.00610474		1537.99	0.01014324		2067.98	0.01273543		2597.98	0.00449351		3127.97	0.00327009		3657.97	0.00406389		4187.97	0.01937878
478.2	-0.02501187		1008.19	-0.00568279		1538.19	0.01121564		2068.18	0.01262526		2598.18	0.00373564		3128.17	0.00313527		3658.17	0.00409162		4188.17	0.01935783
478.4	-0.02581614		1008.39	-0.00533676		1538.39	0.01220615		2068.38	0.01364327		2598.38	0.00345122		3128.37	0.00330065		3658.37	0.00397716		4188.37	0.0194241
478.6	-0.02581958		1008.59	-0.0052121		1538.59	0.01334081		2068.58	0.0140306		2598.58	0.00309996		3128.57	0.00364268		3658.57	0.00398092		4188.57	0.01916217
478.8	-0.02574285		1008.79	-0.00553943		1538.79	0.01413704		2068.78	0.01433379		2598.78	0.00228312		3128.77	0.0030738		3658.77	0.00320145		4188.77	0.01922343
479	-0.02513854		1008.99	-0.00503451		1538.99	0.01458058		2068.98	0.01424925		2598.98	0.00345167		3128.97	0.00355367		3658.97	0.00302749		4188.97	0.02002963
479.2	-0.02481613		1009.19	-0.00592757		1539.19	0.01470266		2069.18	0.01445417		2599.18	0.00264906		3129.17	0.00379865		3659.17	0.00334882		4189.17	0.02024672
479.4	-0.02532168		1009.39	-0.00670426		1539.39	0.01527845		2069.38	0.01536224		2599.38	0.00375361		3129.37	0.00293261		3659.37	0.00300833		4189.37	0.02043694
479.6	-0.02648103		1009.59	-0.00675772		1539.59	0.01520687		2069.58	0.01472774		2599.58	0.00385658		3129.57	0.00266772		3659.57	0.00221803		4189.57	0.02058266
479.8	-0.02686093		1009.79	-0.00580714		1539.79	0.01482028		2069.78	0.01448521		2599.78	0.00505224		3129.77	0.00302274		3659.77	0.00201436		4189.77	0.02078378
480	-0.02739108		1009.99	-0.00553684		1539.99	0.01459755		2069.98	0.01438834		2599.98	0.00561834		3129.97	0.00272907		3659.97	0.00198666		4189.97	0.02106485
480.2	-0.02747367		1010.19	-0.00596808		1540.19	0.0146543		2070.18	0.01430712		2600.18	0.00587059		3130.17	0.00203986		3660.17	0.00232882		4190.17	0.02042735
480.4	-0.02856404		1010.39	-0.0061223		1540.39	0.01416322		2070.38	0.01362333		2600.38	0.00564509		3130.37	0.00226559		3660.37	0.0024698		4190.37	0.01997275
480.6	-0.0296071		1010.59	-0.00714386		1540.59	0.01471347		2070.58	0.01407693		2600.58	0.00607114		3130.57	0.00101494		3660.57	0.00271999		4190.57	0.01946889
480.8	-0.03004646		1010.79	-0.00699195		1540.79	0.0143653		2070.78	0.01326078		2600.78	0.00607902		3130.77	0.00104731		3660.77	0.00273273		4190.77	0.01891397
481	-0.03090711		1010.99	-0.00814633		1540.99	0.01363526		2070.98	0.01361846		2600.98	0.00517508		3130.97	0.00105617		3660.97	0.00241833		4190.97	0.01858856
481.2	-0.03117285		1011.19	-0.00884059		1541.19	0.0136488		2071.18	0.01397912		2601.18	0.00551924		3131.17	0.00154428		3661.17	0.00223741		4191.17	0.01781891
481.4	-0.03096367		1011.39	-0.00869874		1541.39	0.01368029		2071.38	0.01442229		2601.38	0.00506359		3131.37	0.00153351		3661.37	0.00257209		4191.37	0.01819104
481.6	-0.03041018		1011.59	-0.00925556		1541.59	0.01252607		2071.58	0.01486023		2601.58	0.00497259		3131.57	0.00255852		3661.57	0.00232789		4191.57	0.01908725
481.8	-0.02990298		1011.79	-0.00883352		1541.79	0.012018		2071.78	0.01426214		2601.78	0.00497839		3131.77	0.00299508		3661.77	0.00286548		4191.77	0.01825788
482	-0.02884779		1011.99	-0.00909914		1541.99	0.01142814		2071.98	0.01381552		2601.98	0.00524149		3131.97	0.00358308		3661.97	0.00251987		4191.97	0.01951665
482.2	-0.02905394		1012.19	-0.00862447		1542.19	0.01243022		2072.18	0.01371276		2602.18	0.00401688		3132.17	0.00342106		3662.17	0.0034736		4192.17	0.01935563
482.4	-0.02845509		1012.39	-0.00869354		1542.39	0.01259457		2072.38	0.01313202		2602.38	0.00410012		3132.37	0.00376594		3662.37	0.00362449		4192.37	0.01905506
482.6	-0.02751237		1012.59	-0.00884855		1542.59	0.01169878		2072.58	0.01293277		2602.58	0.0037914		3132.57	0.00373486		3662.57	0.00281232		4192.57	0.01925215
482.8	-0.02628596		1012.79	-0.00803845		1542.79	0.01154094		2072.78	0.01291644		2602.78	0.00346572		3132.77	0.00401394		3662.77	0.0036805		4192.77	0.02015009
483	-0.02511255		1012.99	-0.00769623		1542.99	0.01206968		2072.98	0.01285034		2602.98	0.00358787		3132.97	0.00398659		3662.97	0.00372822		4192.97	0.02052674
483.2	-0.02489694		1013.19	-0.00850785		1543.19	0.01170142		2073.18	0.01346372		2603.18	0.00369673		3133.17	0.00409898		3663.17	0.00408813		4193.17	0.02024467
483.4	-0.02486644		1013.39	-0.00778745		1543.39	0.01234427		2073.38	0.01328187		2603.38	0.00442266		3133.37	0.0028228		3663.37	0.00355199		4193.37	0.02081543
483.6	-0.02521716		1013.59	-0.00657684		1543.59	0.01267636		2073.58	0.01293676		2603.58	0.00449412		3133.57	0.00244892		3663.57	0.0038437		4193.57	0.0206682
483.8	-0.02510809		1013.79	-0.0058254		1543.79	0.01255028		2073.78	0.01288818		2603.78	0.00493512		3133.77	0.0032047		3663.77	0.00364093		4193.77	0.02123438
484	-0.02394409		1013.99	-0.00576628		1543.99	0.0128082		2073.98	0.01339437		2603.98	0.00425131		3133.97	0.00223507		3663.97	0.00308216		4193.97	0.02082317
484.2	-0.02447356		1014.19	-0.00570334		1544.19	0.01434188		2074.18	0.01440306		2604.18	0.00360253		3134.17	0.00177804		3664.17	0.00280548		4194.17	0.02019962
484.4	-0.025105		1014.39	-0.00592943		1544.39	0.01484866		2074.38	0.01430436		2604.38	0.00366871		3134.37	0.0020864		3664.37	0.00192042		4194.37	0.02001744
484.6	-0.02589206		1014.59	-0.00640148		1544.59	0.01479431		2074.58	0.01457143		2604.58	0.00283993		3134.57	0.00103007		3664.57	0.00222348		4194.57	0.01986954
484.8	-0.02650609		1014.79	-0.00631944		1544.79	0.01341102		2074.78	0.0140118		2604.78	0.00172112		3134.77	0.00200788		3664.77	0.00320235		4194.77	0.01921287
485	-0.02699285		1014.99	-0.00601678		1544.99	0.01307139		2074.98	0.01502221		2604.98	0.00187769		3134.97	0.00244496		3664.97	0.00271671		4194.97	0.01886278
485.2	-0.02792227		1015.19	-0.00574912		1545.19	0.01362102		2075.18	0.01544877		2605.18	0.00241487		3135.17	0.00309946		3665.17	0.00283315		4195.17	0.01778238
485.4	-0.02789618		1015.39	-0.00571502		1545.39	0.01335359		2075.38	0.01426511		2605.38	0.00194579		3135.37	0.00315553		3665.37	0.0033225		4195.37	0.01690044
485.6	-0.02774616		1015.59	-0.0053723		1545.59	0.01318785		2075.58	0.01387821		2605.58	0.00217217		3135.57	0.00353057		3665.57	0.00308894		4195.57	0.01712018
485.8	-0.02832828		1015.79	-0.00600031		1545.79	0.01367473		2075.78	0.01339791		2605.78	0.00274679		3135.77	0.00358622		3665.77	0.00385985		4195.77	0.01637214
486	-0.02895696		1015.99	-0.00705593		1545.99	0.0131104		2075.98	0.01337104		2605.98	0.00243131		3135.97	0.00438082		3665.97	0.00347653		4195.97	0.01688695
486.2	-0.03012539		1016.19	-0.0072761		1546.19	0.01350471		2076.18	0.01340799		2606.18	0.00177076		3136.17	0.00428181		3666.17	0.00382518		4196.17	0.01587508
486.4	-0.02963984		1016.39	-0.00717897		1546.39	0.01272711		2076.38	0.01323587		2606.38	0.00248096		3136.37	0.00411237		3666.37	0.00416439		4196.37	0.01508291
486.6	-0.02925791		1016.59	-0.00777973		1546.59	0.01253155		2076.58	0.01430607		2606.58	0.00271027		3136.57	0.00375974		3666.57	0.00428294		4196.57	0.01502192
486.8	-0.02892277		1016.79	-0.00748438		1546.79	0.01289144		2076.78	0.01441305		2606.78	0.00324358		3136.77	0.00410918		3666.77	0.0056833		4196.77	0.01463552
487	-0.02877763		1016.99	-0.00845061		1546.99	0.01310245		2076.98	0.01484703		2606.98	0.00365132		3136.97	0.00360046		3666.97	0.00550161		4196.97	0.01423148
487.2	-0.0286431		1017.19	-0.00850531		1547.19	0.01282255		2077.18	0.01534848		2607.18	0.00421422		3137.17	0.00372632		3667.17	0.00562112		4197.17	0.01425166
487.4	-0.02829762		1017.39	-0.00913132		1547.39	0.01353868		2077.38	0.01447723		2607.38	0.00461444		3137.37	0.00329538		3667.37	0.00485999		4197.37	0.01539869
487.6	-0.02854127		1017.59	-0.01000371		1547.59	0.01380036		2077.58	0.01482663		2607.58	0.00394354		3137.57	0.00360905		3667.57	0.00490867		4197.57	0.01511634
487.8	-0.02898395		1017.79	-0.01073934		1547.79	0.01349447		2077.78	0.01452706		2607.78	0.00410896		3137.77	0.00372156		3667.77	0.00407836		4197.77	0.01618993
488	-0.02765674		1017.99	-0.01012964		1547.99	0.01365023		2077.98	0.01518934		2607.98	0.00349417		3137.97	0.00230359		3667.97	0.00317667		4197.97	0.01661747
488.2	-0.02860275		1018.19	-0.01000689		1548.19	0.01405847		2078.18	0.01538197		2608.18	0.00355512		3138.17	0.00217744		3668.17	0.00259467		4198.17	0.01634889
488.4	-0.02866377		1018.39	-0.00982885		1548.39	0.0126403		2078.38	0.01499251		2608.38	0.00358713		3138.37	0.00241545		3668.37	0.00249994		4198.37	0.01647111
488.6	-0.02798501		1018.59	-0.00918449		1548.59	0.01178556		2078.58	0.01415519		2608.58	0.00321871		3138.57	0.00309103		3668.57	0.00339543		4198.57	0.01761784
488.8	-0.02748025		1018.79	-0.00874999		1548.79	0.0111739		2078.78	0.01381423		2608.78	0.00279326		3138.77	0.00312421		3668.77	0.002818		4198.77	0.01794704
489	-0.02790228		1018.99	-0.00736401		1548.99	0.01102493		2078.98	0.01332857		2608.98	0.00356797		3138.97	0.00330456		3668.97	0.00171598		4198.97	0.01743556
489.2	-0.02831525		1019.19	-0.00589584		1549.19	0.01025665		2079.18	0.01257716		2609.18	0.00308389		3139.17	0.00348183		3669.17	0.00179335		4199.17	0.01765022
489.4	-0.02800951		1019.39	-0.00488048		1549.39	0.00974694		2079.38	0.01301691		2609.38	0.00294038		3139.37	0.00347943		3669.37	0.00202993		4199.37	0.0176302
489.6	-0.02832495		1019.59	-0.00351799		1549.59	0.0091577		2079.58	0.01257573		2609.58	0.0036065		3139.57	0.00316202		3669.57	0.0022495		4199.57	0.01813683
489.8	-0.02900037		1019.79	-0.0032572		1549.79	0.00805802		2079.78	0.01254465		2609.78	0.00364302		3139.77	0.00366014		3669.77	0.00209756		4199.77	0.01785838
490	-0.02921183		1019.99	-0.00329702		1549.99	0.00765885		2079.98	0.01196495		2609.98	0.00337896		3139.97	0.00433841		3669.97	0.00140987		4199.97	0.01777891
490.2	-0.02907837		1020.19	-0.00292132		1550.19	0.00725068		2080.18	0.01130466		2610.18	0.003509		3140.17	0.00374481		3670.17	0.0013618		4200.17	0.01753375
490.4	-0.02850226		1020.39	-0.00271377		1550.39	0.00683923		2080.38	0.01141654		2610.38	0.00470377		3140.37	0.00336779		3670.37	0.00183797		4200.37	0.01775541
490.6	-0.02821065		1020.59	-0.00284594		1550.59	0.00685071		2080.58	0.01167328		2610.58	0.00565463		3140.57	0.0038863		3670.57	0.00171827		4200.57	0.01732622
490.8	-0.02788203		1020.79	-0.00334901		1550.79	0.00720222		2080.78	0.01139669		2610.78	0.00539432		3140.77	0.00419132		3670.77	0.00202111		4200.77	0.01747479
491	-0.0280295		1020.99	-0.00437342		1550.99	0.00798583		2080.98	0.01144421		2610.98	0.00491183		3140.97	0.00361767		3670.97	0.00199383		4200.97	0.0174437
491.2	-0.02782997		1021.19	-0.00462645		1551.19	0.00821566		2081.18	0.01108594		2611.18	0.00503067		3141.17	0.00365299		3671.17	0.00225501		4201.17	0.01691208
491.4	-0.02802642		1021.39	-0.00596154		1551.39	0.00833422		2081.38	0.01134383		2611.38	0.0055994		3141.37	0.00382987		3671.37	0.00313789		4201.37	0.01704549
491.6	-0.02934041		1021.59	-0.00624321		1551.59	0.00898352		2081.58	0.0118172		2611.58	0.00559649		3141.57	0.00400079		3671.57	0.00372251		4201.57	0.01656072
491.8	-0.03049428		1021.79	-0.00646002		1551.79	0.00844086		2081.78	0.01184794		2611.78	0.00517415		3141.77	0.00274556		3671.77	0.00405195		4201.77	0.01671899
492	-0.02994188		1021.99	-0.0062254		1551.99	0.0090779		2081.98	0.01196095		2611.98	0.00472262		3141.97	0.00247944		3671.97	0.00387253		4201.97	0.01639643
492.2	-0.03102263		1022.19	-0.00649789		1552.19	0.00935011		2082.18	0.01185165		2612.18	0.00503788		3142.17	0.00250034		3672.17	0.00400265		4202.17	0.01625975
492.4	-0.0321381		1022.39	-0.00688473		1552.39	0.00868975		2082.38	0.01170777		2612.38	0.00521796		3142.37	0.00233836		3672.37	0.00423693		4202.37	0.01695683
492.6	-0.0315658		1022.59	-0.00743102		1552.59	0.00924037		2082.58	0.01098161		2612.58	0.00491868		3142.57	0.00271941		3672.57	0.00375237		4202.57	0.01782626
492.8	-0.03153213		1022.79	-0.00658203		1552.79	0.00897041		2082.78	0.01087333		2612.78	0.00469772		3142.77	0.00203281		3672.77	0.00279986		4202.77	0.01687178
493	-0.03284418		1022.99	-0.00616733		1552.99	0.00880094		2082.98	0.01173987		2612.98	0.0046587		3142.97	0.00308048		3672.97	0.00307197		4202.97	0.01595935
493.2	-0.03255038		1023.19	-0.00575281		1553.19	0.00948263		2083.18	0.01238359		2613.18	0.00411273		3143.17	0.00282877		3673.17	0.003838		4203.17	0.01518974
493.4	-0.03290935		1023.39	-0.00519841		1553.39	0.01032625		2083.38	0.01322245		2613.38	0.00483437		3143.37	0.00275399		3673.37	0.00398504		4203.37	0.01450627
493.6	-0.03372102		1023.59	-0.00557623		1553.59	0.01033073		2083.58	0.0123961		2613.58	0.003989		3143.57	0.00304235		3673.57	0.00474353		4203.57	0.01400541
493.8	-0.03242974		1023.79	-0.00587468		1553.79	0.01056186		2083.78	0.01258184		2613.78	0.00347941		3143.77	0.00369793		3673.77	0.00447062		4203.77	0.0147974
494	-0.03216721		1023.99	-0.00633746		1553.99	0.01065606		2083.98	0.01170798		2613.98	0.0026647		3143.97	0.00405734		3673.97	0.00384586		4203.97	0.01495898
494.2	-0.03157348		1024.19	-0.0064797		1554.19	0.01101926		2084.18	0.01167234		2614.18	0.00234837		3144.17	0.00335861		3674.17	0.00314466		4204.17	0.01526775
494.4	-0.03119657		1024.39	-0.00666072		1554.39	0.01206619		2084.38	0.01090361		2614.38	0.00220831		3144.37	0.00343537		3674.37	0.00316542		4204.37	0.01612598
494.6	-0.03005492		1024.59	-0.00703287		1554.59	0.01226014		2084.58	0.01055125		2614.58	0.00106999		3144.57	0.0034767		3674.57	0.00351929		4204.57	0.01577307
494.8	-0.02916977		1024.79	-0.00783121		1554.79	0.01295581		2084.78	0.00982739		2614.78	-0.00060484		3144.77	0.00331688		3674.77	0.00256153		4204.77	0.01594969
495	-0.02891617		1024.99	-0.00804427		1554.99	0.01316746		2084.98	0.01008504		2614.98	-0.00078026		3144.97	0.00357686		3674.97	0.00291008		4204.97	0.01519337
495.2	-0.0280095		1025.19	-0.00798946		1555.19	0.0130507		2085.18	0.01081717		2615.18	-0.00020374		3145.17	0.00355305		3675.17	0.00286054		4205.17	0.01595397
495.4	-0.0282362		1025.39	-0.00779878		1555.39	0.01170583		2085.38	0.01090023		2615.38	-0.00034681		3145.37	0.00393791		3675.37	0.00201554		4205.37	0.01617531
495.6	-0.02926245		1025.59	-0.00798346		1555.59	0.01176138		2085.58	0.0102075		2615.58	-0.00048294		3145.57	0.00368537		3675.57	0.00195272		4205.57	0.01691631
495.8	-0.02885808		1025.79	-0.00726345		1555.79	0.01125548		2085.78	0.0101929		2615.78	-0.00074624		3145.77	0.00320796		3675.77	0.00162093		4205.77	0.01702208
496	-0.02930463		1025.99	-0.00721455		1555.99	0.01111806		2085.98	0.01003578		2615.98	0.0003367		3145.97	0.00342462		3675.97	0.00071355		4205.97	0.01815391
496.2	-0.02993341		1026.19	-0.00725721		1556.19	0.01030617		2086.18	0.00934278		2616.18	0.00121068		3146.17	0.00370403		3676.17	0.00043995		4206.17	0.01875856
496.4	-0.03075067		1026.39	-0.0074251		1556.39	0.00981774		2086.38	0.00904372		2616.38	0.00197017		3146.37	0.00395404		3676.37	0.00027274		4206.37	0.01941885
496.6	-0.03030599		1026.59	-0.00782352		1556.59	0.00992859		2086.58	0.00898973		2616.58	0.00241442		3146.57	0.0043251		3676.57	0.00014393		4206.57	0.01964535
496.8	-0.03049066		1026.79	-0.00735268		1556.79	0.00957373		2086.78	0.00907603		2616.78	0.0032979		3146.77	0.00476538		3676.77	0.00025785		4206.77	0.01882716
497	-0.03026522		1026.99	-0.00774212		1556.99	0.00990398		2086.98	0.00939289		2616.98	0.00409321		3146.97	0.00515716		3676.97	0.00117869		4206.97	0.01860642
497.2	-0.0296763		1027.19	-0.00796101		1557.19	0.00991563		2087.18	0.00975713		2617.18	0.00443514		3147.17	0.00455125		3677.17	0.0015635		4207.17	0.01875373
497.4	-0.03006902		1027.39	-0.0081629		1557.39	0.00935454		2087.38	0.01008651		2617.38	0.00476477		3147.37	0.00433283		3677.37	0.00214143		4207.37	0.01974359
497.6	-0.02989378		1027.59	-0.00892216		1557.59	0.00949761		2087.58	0.00954228		2617.58	0.00425398		3147.57	0.00468241		3677.57	0.00279821		4207.57	0.01979586
497.8	-0.02940235		1027.79	-0.00940692		1557.79	0.00922986		2087.78	0.00888499		2617.78	0.00485024		3147.77	0.00452443		3677.77	0.00335841		4207.77	0.01974013
498	-0.03028425		1027.99	-0.00926369		1557.99	0.00888432		2087.98	0.00908103		2617.98	0.00541417		3147.97	0.00412893		3677.97	0.00285648		4207.97	0.01924253
498.2	-0.02986068		1028.19	-0.00939083		1558.19	0.00988277		2088.18	0.00935979		2618.18	0.00658264		3148.17	0.00322532		3678.17	0.00243586		4208.17	0.01905432
498.4	-0.0300615		1028.39	-0.00936358		1558.39	0.01073378		2088.38	0.00894122		2618.38	0.0057617		3148.37	0.00284042		3678.37	0.00304965		4208.37	0.01901905
498.6	-0.02921263		1028.59	-0.00921649		1558.59	0.00973306		2088.58	0.00957425		2618.58	0.00578752		3148.57	0.00179035		3678.57	0.00273405		4208.57	0.01731918
498.8	-0.02945965		1028.79	-0.0091945		1558.79	0.00992996		2088.78	0.00977146		2618.78	0.00561795		3148.77	0.00125921		3678.77	0.00234709		4208.77	0.01627015
499	-0.02995189		1028.99	-0.00851934		1558.99	0.00999871		2088.98	0.01153965		2618.98	0.00568176		3148.97	0.00092482		3678.97	0.00301727		4208.97	0.01556213
499.2	-0.02931739		1029.19	-0.00779276		1559.19	0.01000347		2089.18	0.01130032		2619.18	0.00511751		3149.17	0.00054797		3679.17	0.002506		4209.17	0.01558354
499.4	-0.02917065		1029.39	-0.00741477		1559.39	0.00994847		2089.38	0.01096923		2619.38	0.00345901		3149.37	0.00109991		3679.37	0.0021098		4209.37	0.01496926
499.6	-0.02894711		1029.59	-0.00666202		1559.59	0.01157325		2089.58	0.01130347		2619.58	0.00232768		3149.57	0.0011926		3679.57	0.00278414		4209.57	0.01545115
499.8	-0.02867471		1029.79	-0.00561092		1559.79	0.01160255		2089.78	0.01090191		2619.78	0.00285489		3149.77	0.00126533		3679.77	0.00180439		4209.77	0.01480005
500	-0.02852086		1029.99	-0.00604339		1559.99	0.01076332		2089.98	0.01031389		2619.98	0.00214131		3149.97	0.00109132		3679.97	0.00285562		4209.97	0.01539676
500.2	-0.02829912		1030.19	-0.00586161		1560.19	0.01127461		2090.18	0.01033363		2620.18	0.00150957		3150.17	0.00076478		3680.17	0.00370911		4210.17	0.01510548
500.4	-0.0285265		1030.39	-0.00550785		1560.39	0.01199904		2090.38	0.0101791		2620.38	0.00134013		3150.37	0.00083052		3680.37	0.00388672		4210.37	0.01527258
500.6	-0.02782244		1030.59	-0.00610722		1560.59	0.01224105		2090.58	0.0104492		2620.58	0.00188396		3150.57	0.00112129		3680.57	0.0037541		4210.57	0.01558872
500.8	-0.02763909		1030.79	-0.00611513		1560.79	0.0117305		2090.78	0.01005383		2620.78	0.00230214		3150.77	0.00142246		3680.77	0.00366161		4210.77	0.01592454
501	-0.02681632		1030.99	-0.00700759		1560.99	0.01159392		2090.98	0.0098791		2620.98	0.00205577		3150.97	0.00142209		3680.97	0.00389768		4210.97	0.01644659
501.2	-0.02663883		1031.19	-0.00712627		1561.19	0.01157697		2091.18	0.00924266		2621.18	0.00150897		3151.17	0.00147942		3681.17	0.00358087		4211.17	0.01657539
501.4	-0.02684271		1031.39	-0.00759282		1561.39	0.01170237		2091.38	0.00847786		2621.38	0.00144543		3151.37	0.00188094		3681.37	0.00273285		4211.37	0.01675894
501.6	-0.02678316		1031.59	-0.00839563		1561.59	0.01233278		2091.58	0.00767791		2621.58	0.00180972		3151.57	0.00273551		3681.57	0.00259758		4211.57	0.01624401
501.8	-0.0275739		1031.79	-0.00864597		1561.79	0.01155827		2091.78	0.00802825		2621.78	0.00229394		3151.77	0.00230391		3681.77	0.00175494		4211.77	0.01585043
502	-0.02781532		1031.99	-0.00891523		1561.99	0.01187993		2091.98	0.00903932		2621.98	0.00340793		3151.97	0.00167246		3681.97	0.00034977		4211.97	0.01567522
502.2	-0.02763005		1032.19	-0.00954267		1562.19	0.01266306		2092.18	0.00895905		2622.18	0.00340734		3152.17	0.00147439		3682.17	-0.00012354		4212.17	0.01552807
502.4	-0.02844803		1032.39	-0.00985264		1562.39	0.01352934		2092.38	0.00909322		2622.38	0.00185036		3152.37	0.00136518		3682.37	-0.00025348		4212.37	0.01514722
502.6	-0.02848663		1032.59	-0.01021176		1562.59	0.01322525		2092.58	0.00963459		2622.58	0.00236374		3152.57	0.0014668		3682.57	-0.00058399		4212.57	0.01436478
502.8	-0.02917817		1032.79	-0.01029714		1562.79	0.01356219		2092.78	0.00960882		2622.78	0.00185208		3152.77	0.00183096		3682.77	0.00031182		4212.77	0.01398568
503	-0.02915919		1032.99	-0.01029435		1562.99	0.0135828		2092.98	0.01028734		2622.98	0.00093922		3152.97	0.00236552		3682.97	0.00019696		4212.97	0.014041
503.2	-0.02907417		1033.19	-0.00994654		1563.19	0.01378871		2093.18	0.00989031		2623.18	0.00061046		3153.17	0.00328413		3683.17	-0.00017769		4213.17	0.01514481
503.4	-0.02940421		1033.39	-0.00954407		1563.39	0.01460579		2093.38	0.00913476		2623.38	0.00059737		3153.37	0.00374285		3683.37	-0.00037861		4213.37	0.01530127
503.6	-0.02955393		1033.59	-0.00908234		1563.59	0.01477632		2093.58	0.00859413		2623.58	0.00107073		3153.57	0.0040059		3683.57	0.00007054		4213.57	0.01518978
503.8	-0.02953966		1033.79	-0.00877977		1563.79	0.014329		2093.78	0.00727837		2623.78	0.00223118		3153.77	0.00364034		3683.77	0.00111945		4213.77	0.01527506
504	-0.03004637		1033.99	-0.00799143		1563.99	0.01371933		2093.98	0.00726171		2623.98	0.00181672		3153.97	0.00326915		3683.97	0.0017205		4213.97	0.01573743
504.2	-0.03081305		1034.19	-0.00734636		1564.19	0.01416363		2094.18	0.00761127		2624.18	0.00195261		3154.17	0.00283427		3684.17	0.00115595		4214.17	0.01557585
504.4	-0.03086083		1034.39	-0.00665632		1564.39	0.01420128		2094.38	0.00710033		2624.38	0.00229004		3154.37	0.00285141		3684.37	0.00158749		4214.37	0.01691599
504.6	-0.0302722		1034.59	-0.00721917		1564.59	0.01340533		2094.58	0.00727724		2624.58	0.00247843		3154.57	0.00263855		3684.57	0.0014145		4214.57	0.01772224
504.8	-0.0311793		1034.79	-0.00715955		1564.79	0.01312773		2094.78	0.00691137		2624.78	0.00214029		3154.77	0.00264171		3684.77	0.00237575		4214.77	0.01842073
505	-0.03112027		1034.99	-0.00739963		1564.99	0.01354954		2094.98	0.00632367		2624.98	0.00197232		3154.97	0.00301128		3684.97	0.00259499		4214.97	0.01833098
505.2	-0.03108694		1035.19	-0.00706535		1565.19	0.01357907		2095.18	0.00479907		2625.18	0.00219129		3155.17	0.00277657		3685.17	0.00262396		4215.17	0.01783754
505.4	-0.03148173		1035.39	-0.00742825		1565.39	0.01276406		2095.38	0.00511954		2625.38	0.00188084		3155.37	0.00209044		3685.37	0.00268712		4215.37	0.01831436
505.6	-0.03187143		1035.59	-0.00781466		1565.59	0.01238784		2095.58	0.00495034		2625.58	0.00100145		3155.57	0.0016116		3685.57	0.00358503		4215.57	0.01798317
505.8	-0.03230548		1035.79	-0.0079986		1565.79	0.01222429		2095.78	0.00575748		2625.78	0.00057423		3155.77	0.0004577		3685.77	0.00312285		4215.77	0.01788171
506	-0.03156285		1035.99	-0.00844864		1565.99	0.01274979		2095.98	0.0064574		2625.98	-0.00060779		3155.97	0.00000121		3685.97	0.00339717		4215.97	0.01750766
506.2	-0.03162289		1036.19	-0.00859217		1566.19	0.01302172		2096.18	0.00752127		2626.18	-0.00131382		3156.17	-0.00009845		3686.17	0.00332014		4216.17	0.0173778
506.4	-0.03198135		1036.39	-0.00968775		1566.39	0.01312292		2096.38	0.00822858		2626.38	-0.00153549		3156.37	-0.00046428		3686.37	0.003346		4216.37	0.01645042
506.6	-0.03111727		1036.59	-0.01004633		1566.59	0.01315414		2096.58	0.00900218		2626.58	-0.00045601		3156.57	-0.00072178		3686.57	0.00354278		4216.57	0.0161645
506.8	-0.03115955		1036.79	-0.00987455		1566.79	0.01276214		2096.78	0.00944983		2626.78	-0.00119662		3156.77	-0.00042741		3686.77	0.0035328		4216.77	0.01612752
507	-0.03016234		1036.99	-0.00936486		1566.99	0.01227923		2096.98	0.01019611		2626.98	-0.00108323		3156.97	0.00003569		3686.97	0.00276403		4216.97	0.01622242
507.2	-0.03006978		1037.19	-0.00887963		1567.19	0.01153212		2097.18	0.01040622		2627.18	-0.00105504		3157.17	0.00046244		3687.17	0.00264802		4217.17	0.01624137
507.4	-0.02944684		1037.39	-0.00944735		1567.39	0.01131608		2097.38	0.01007539		2627.38	-0.00106777		3157.37	0.00017189		3687.37	0.00237091		4217.37	0.01556606
507.6	-0.02963208		1037.59	-0.00992739		1567.59	0.01059051		2097.58	0.01049295		2627.58	-0.00104925		3157.57	0.00019493		3687.57	0.0019317		4217.57	0.01579901
507.8	-0.02930379		1037.79	-0.00980375		1567.79	0.01029596		2097.78	0.01070431		2627.78	-0.00081405		3157.77	0.00042666		3687.77	0.00159309		4217.77	0.01700187
508	-0.02956128		1037.99	-0.00889099		1567.99	0.01022447		2097.98	0.01079551		2627.98	-0.00025356		3157.97	0.00052901		3687.97	0.00005079		4217.97	0.01685071
508.2	-0.02929153		1038.19	-0.008673		1568.19	0.0100663		2098.18	0.01133116		2628.18	-0.00049846		3158.17	0.00117526		3688.17	0.00035156		4218.17	0.01664669
508.4	-0.02830768		1038.39	-0.00818422		1568.39	0.00912908		2098.38	0.01144262		2628.38	0.0001273		3158.37	0.00138014		3688.37	0.00009406		4218.37	0.01700999
508.6	-0.02862813		1038.59	-0.00834676		1568.59	0.00888967		2098.58	0.01104455		2628.58	0.00043147		3158.57	0.00176527		3688.57	0.00014434		4218.57	0.01624668
508.8	-0.0295234		1038.79	-0.00888356		1568.79	0.00919525		2098.78	0.01043715		2628.78	0.00107991		3158.77	0.00269476		3688.77	0.00085051		4218.77	0.01572179
509	-0.02928384		1038.99	-0.00897115		1568.99	0.00818332		2098.98	0.00964993		2628.98	0.00222998		3158.97	0.00289195		3688.97	0.0003702		4218.97	0.01497425
509.2	-0.02937869		1039.19	-0.00838547		1569.19	0.00715228		2099.18	0.00924978		2629.18	0.00235229		3159.17	0.00202172		3689.17	0.00078167		4219.17	0.01473111
509.4	-0.02989348		1039.39	-0.00854189		1569.39	0.00633582		2099.38	0.00941346		2629.38	0.0021838		3159.37	0.00139035		3689.37	0.0009208		4219.37	0.01548752
509.6	-0.030442		1039.59	-0.0083041		1569.59	0.00656366		2099.58	0.00939966		2629.58	0.00171219		3159.57	0.00114671		3689.57	0.0008481		4219.57	0.01476368
509.8	-0.0303458		1039.79	-0.00765918		1569.79	0.00607499		2099.78	0.00914091		2629.78	0.0014703		3159.77	0.00125506		3689.77	0.00031671		4219.77	0.01436497
510	-0.03007528		1039.99	-0.00701395		1569.99	0.00588269		2099.98	0.00955432		2629.98	0.00069724		3159.97	0.00247968		3689.97	-0.00037353		4219.97	0.01441199
510.2	-0.03073046		1040.19	-0.00717339		1570.19	0.00667745		2100.18	0.0099285		2630.18	0.00235496		3160.17	0.0022964		3690.17	-0.00029128		4220.17	0.01365511
510.4	-0.02968815		1040.39	-0.00731755		1570.39	0.00761893		2100.38	0.01008059		2630.38	0.00261786		3160.37	0.00192429		3690.37	0.00009182		4220.37	0.01401912
510.6	-0.028875		1040.59	-0.00682596		1570.59	0.00873991		2100.58	0.01035445		2630.58	0.00245322		3160.57	0.00247318		3690.57	0.00101653		4220.57	0.01491775
510.8	-0.02876976		1040.79	-0.00577774		1570.79	0.00860393		2100.78	0.01099669		2630.78	0.00143729		3160.77	0.00299256		3690.77	0.00083498		4220.77	0.01495567
511	-0.02812823		1040.99	-0.00507083		1570.99	0.00876865		2100.98	0.01056454		2630.98	0.00125655		3160.97	0.00294764		3690.97	0.0007357		4220.97	0.01517376
511.2	-0.02860187		1041.19	-0.00600724		1571.19	0.0082868		2101.18	0.01077503		2631.18	0.00076996		3161.17	0.00250802		3691.17	0.0008705		4221.17	0.01516207
511.4	-0.02890896		1041.39	-0.00692497		1571.39	0.00958618		2101.38	0.01116359		2631.38	0.00068747		3161.37	0.00269914		3691.37	0.00026855		4221.37	0.01587843
511.6	-0.02980071		1041.59	-0.00674383		1571.59	0.00978815		2101.58	0.01039703		2631.58	0.00025835		3161.57	0.0034975		3691.57	0.00004591		4221.57	0.01606951
511.8	-0.029769		1041.79	-0.00627186		1571.79	0.01064192		2101.78	0.01068909		2631.78	-0.0004452		3161.77	0.00390007		3691.77	-0.0002019		4221.77	0.01685879
512	-0.02973404		1041.99	-0.00584341		1571.99	0.01104259		2101.98	0.01021077		2631.98	-0.00074395		3161.97	0.00392405		3691.97	-0.00031513		4221.97	0.01596337
512.2	-0.02974908		1042.19	-0.00652407		1572.19	0.00992653		2102.18	0.01063645		2632.18	-0.0016179		3162.17	0.00374755		3692.17	-0.00061647		4222.17	0.01540622
512.4	-0.02984994		1042.39	-0.00585578		1572.39	0.00991188		2102.38	0.01076138		2632.38	-0.00124143		3162.37	0.00281112		3692.37	-0.00064623		4222.37	0.01481582
512.6	-0.03117144		1042.59	-0.00626669		1572.59	0.01019003		2102.58	0.01013534		2632.58	-0.00080574		3162.57	0.00227104		3692.57	0.00000597		4222.57	0.01412935
512.8	-0.03182804		1042.79	-0.00754525		1572.79	0.00942179		2102.78	0.0101287		2632.78	0.00013787		3162.77	0.00173474		3692.77	-0.00057048		4222.77	0.01415629
513	-0.03228839		1042.99	-0.00737959		1572.99	0.0083532		2102.98	0.01008288		2632.98	0.00055942		3162.97	0.00156234		3692.97	-0.00133579		4222.97	0.01418849
513.2	-0.03286385		1043.19	-0.00715679		1573.19	0.00833757		2103.18	0.01025394		2633.18	-0.00006306		3163.17	0.00098097		3693.17	-0.00148908		4223.17	0.01372927
513.4	-0.03375633		1043.39	-0.00867361		1573.39	0.0077799		2103.38	0.01016065		2633.38	0.00003619		3163.37	0.00060988		3693.37	-0.00232458		4223.37	0.01405506
513.6	-0.03351691		1043.59	-0.00792484		1573.59	0.00804465		2103.58	0.00974213		2633.58	-0.0002805		3163.57	0.00082708		3693.57	-0.00290111		4223.57	0.0136808
513.8	-0.03296125		1043.79	-0.00874552		1573.79	0.00759034		2103.78	0.00895232		2633.78	-0.00082604		3163.77	0.00123984		3693.77	-0.00316926		4223.77	0.01329653
514	-0.03256782		1043.99	-0.00848138		1573.99	0.00791003		2103.98	0.00954855		2633.98	-0.00139302		3163.97	0.00192754		3693.97	-0.0026737		4223.97	0.01311373
514.2	-0.03212645		1044.19	-0.0087827		1574.19	0.00870195		2104.18	0.00991589		2634.18	-0.00039516		3164.17	0.00080614		3694.17	-0.0018138		4224.17	0.01278936
514.4	-0.03155993		1044.39	-0.00875981		1574.39	0.00904782		2104.38	0.01012756		2634.38	-0.00066555		3164.37	0.0013587		3694.37	-0.00126035		4224.37	0.01404199
514.6	-0.03142733		1044.59	-0.00945869		1574.59	0.00882929		2104.58	0.00936897		2634.58	-0.00104817		3164.57	0.00174127		3694.57	-0.00098053		4224.57	0.0140488
514.8	-0.03176079		1044.79	-0.00869852		1574.79	0.00830922		2104.78	0.00952687		2634.78	-0.00095537		3164.77	0.00161381		3694.77	-0.00121813		4224.77	0.01381513
515	-0.03182999		1044.99	-0.00917506		1574.99	0.00841319		2104.98	0.00891203		2634.98	-0.00096661		3164.97	0.00255761		3694.97	-0.00132815		4224.97	0.01444564
515.2	-0.03158567		1045.19	-0.00926709		1575.19	0.007614		2105.18	0.00939271		2635.18	-0.00150219		3165.17	0.00269017		3695.17	-0.00080232		4225.17	0.01395183
515.4	-0.03165759		1045.39	-0.00878555		1575.39	0.00830942		2105.38	0.00888035		2635.38	-0.00239035		3165.37	0.00275992		3695.37	-0.00035808		4225.37	0.01433311
515.6	-0.03215572		1045.59	-0.00839667		1575.59	0.00803893		2105.58	0.00823589		2635.58	-0.0031281		3165.57	0.00306846		3695.57	0.00035581		4225.57	0.01415492
515.8	-0.03130492		1045.79	-0.00782729		1575.79	0.00858962		2105.78	0.00857378		2635.78	-0.00332014		3165.77	0.00222159		3695.77	0.00083062		4225.77	0.01395752
516	-0.03137796		1045.99	-0.00798537		1575.99	0.00822002		2105.98	0.00846051		2635.98	-0.0024679		3165.97	0.00193731		3695.97	0.00152616		4225.97	0.01396579
516.2	-0.0323293		1046.19	-0.00771365		1576.19	0.00847202		2106.18	0.00858294		2636.18	-0.00241646		3166.17	0.00130575		3696.17	0.00194541		4226.17	0.01335403
516.4	-0.03268539		1046.39	-0.00681132		1576.39	0.00920124		2106.38	0.00912408		2636.38	-0.0015375		3166.37	0.00078866		3696.37	0.00237329		4226.37	0.01239235
516.6	-0.03298752		1046.59	-0.00752548		1576.59	0.00924286		2106.58	0.00872674		2636.58	-0.00050213		3166.57	-0.00015933		3696.57	0.00316809		4226.57	0.01256245
516.8	-0.03295452		1046.79	-0.00818044		1576.79	0.0092367		2106.78	0.00905716		2636.78	-0.00053033		3166.77	-0.00121883		3696.77	0.00281759		4226.77	0.01270683
517	-0.03298104		1046.99	-0.00767944		1576.99	0.01014		2106.98	0.00884851		2636.98	-0.00078979		3166.97	-0.00105647		3696.97	0.00358677		4226.97	0.01208804
517.2	-0.03225587		1047.19	-0.00808506		1577.19	0.01065482		2107.18	0.0084812		2637.18	-0.00024849		3167.17	-0.00180312		3697.17	0.00461114		4227.17	0.01152961
517.4	-0.0318361		1047.39	-0.00929788		1577.39	0.01022477		2107.38	0.00845104		2637.38	0.00034086		3167.37	-0.00231037		3697.37	0.00533948		4227.37	0.01238414
517.6	-0.03106467		1047.59	-0.00835171		1577.59	0.01151359		2107.58	0.00801743		2637.58	0.00097661		3167.57	-0.00145056		3697.57	0.00536441		4227.57	0.01210571
517.8	-0.03067104		1047.79	-0.00900862		1577.79	0.01196179		2107.78	0.00787289		2637.78	0.0016796		3167.77	-0.00137355		3697.77	0.00537454		4227.77	0.01147625
518	-0.0309935		1047.99	-0.00834654		1577.99	0.01174813		2107.98	0.00794203		2637.98	0.00162712		3167.97	-0.00028087		3697.97	0.00545466		4227.97	0.01119097
518.2	-0.03132699		1048.19	-0.0089308		1578.19	0.01227739		2108.18	0.00814052		2638.18	0.00270988		3168.17	0.00075336		3698.17	0.0043743		4228.17	0.01178314
518.4	-0.03149973		1048.39	-0.00952655		1578.39	0.01189921		2108.38	0.00773152		2638.38	0.00300455		3168.37	0.00227765		3698.37	0.00345726		4228.37	0.01255684
518.6	-0.031291		1048.59	-0.00951861		1578.59	0.01195919		2108.58	0.00739746		2638.58	0.00292288		3168.57	0.00273208		3698.57	0.0030157		4228.57	0.0120383
518.8	-0.03135459		1048.79	-0.00930652		1578.79	0.01129327		2108.78	0.008224		2638.78	0.00275655		3168.77	0.00349531		3698.77	0.00177918		4228.77	0.01227511
519	-0.03092148		1048.99	-0.00922089		1578.99	0.01177481		2108.98	0.00844351		2638.98	0.00282826		3168.97	0.00382996		3698.97	0.0013054		4228.97	0.01342261
519.2	-0.03071207		1049.19	-0.0089183		1579.19	0.01120148		2109.18	0.00863628		2639.18	0.00215177		3169.17	0.00301697		3699.17	0.00089529		4229.17	0.01345556
519.4	-0.03145524		1049.39	-0.00848325		1579.39	0.01205866		2109.38	0.0089275		2639.38	0.00138226		3169.37	0.00282157		3699.37	-0.00001419		4229.37	0.01409991
519.6	-0.03170684		1049.59	-0.00834946		1579.59	0.01148274		2109.58	0.00968769		2639.58	0.0012186		3169.57	0.00337496		3699.57	-0.00061229		4229.57	0.0139416
519.8	-0.03132691		1049.79	-0.00810949		1579.79	0.01100699		2109.78	0.01051578		2639.78	0.00165921		3169.77	0.00312096		3699.77	-0.00143595		4229.77	0.01392252
520	-0.03214114		1049.99	-0.00823706		1579.99	0.01031971		2109.98	0.01085424		2639.98	0.00165527		3169.97	0.00263908		3699.97	-0.00254978		4229.97	0.01447056
520.2	-0.03230587		1050.19	-0.00803193		1580.19	0.0105751		2110.18	0.01109833		2640.18	0.00095285		3170.17	0.00128539		3700.17	-0.00304247		4230.17	0.01374161
520.4	-0.03113419		1050.39	-0.00766285		1580.39	0.01081519		2110.38	0.01150021		2640.38	-0.00002197		3170.37	-0.00008249		3700.37	-0.00274194		4230.37	0.01337785
520.6	-0.03084512		1050.59	-0.0071309		1580.59	0.01108162		2110.58	0.0110618		2640.58	-0.00056402		3170.57	-0.00064758		3700.57	-0.0015733		4230.57	0.01332875
520.8	-0.03064973		1050.79	-0.00698119		1580.79	0.0105181		2110.78	0.0112771		2640.78	-0.00109965		3170.77	-0.00136859		3700.77	-0.00155273		4230.77	0.01347689
521	-0.03070335		1050.99	-0.00589408		1580.99	0.01064284		2110.98	0.01041775		2640.98	-0.00075347		3170.97	-0.00131837		3700.97	-0.00064179		4230.97	0.01285131
521.2	-0.03128146		1051.19	-0.00577902		1581.19	0.00977215		2111.18	0.0097257		2641.18	-0.00057494		3171.17	-0.00191469		3701.17	-0.00028284		4231.17	0.01266276
521.4	-0.03179388		1051.39	-0.00616221		1581.39	0.00906798		2111.38	0.01016224		2641.38	-0.0005304		3171.37	-0.00169441		3701.37	-0.00012364		4231.37	0.01320618
521.6	-0.03261468		1051.59	-0.00604936		1581.59	0.00989139		2111.58	0.00943281		2641.58	0.00004399		3171.57	0.00003759		3701.57	-0.00092896		4231.57	0.01270237
521.8	-0.03324487		1051.79	-0.00674199		1581.79	0.00956501		2111.78	0.00893647		2641.78	-0.00004504		3171.77	-0.00017227		3701.77	-0.0006418		4231.77	0.01331772
522	-0.0335575		1051.99	-0.00703816		1581.99	0.00949482		2111.98	0.00865895		2641.98	-0.00084033		3171.97	0.0006402		3701.97	0.00012302		4231.97	0.01328715
522.2	-0.03394994		1052.19	-0.00735738		1582.19	0.00898756		2112.18	0.00835256		2642.18	-0.00059768		3172.17	0.00089804		3702.17	-0.00084179		4232.17	0.01408667
522.4	-0.03406473		1052.39	-0.00760603		1582.39	0.00851957		2112.38	0.00854096		2642.38	-0.00081913		3172.37	0.00115362		3702.37	-0.00019275		4232.37	0.01454494
522.6	-0.03428106		1052.59	-0.00795874		1582.59	0.00829055		2112.58	0.00851376		2642.58	-0.00161035		3172.57	0.00122505		3702.57	-0.00016387		4232.57	0.01434663
522.8	-0.03448606		1052.79	-0.00875232		1582.79	0.00703392		2112.78	0.00818128		2642.78	-0.00232613		3172.77	0.00164508		3702.77	-0.00037195		4232.77	0.01467772
523	-0.03468655		1052.99	-0.00859914		1582.99	0.00668367		2112.98	0.00845966		2642.98	-0.00234456		3172.97	0.00099874		3702.97	0.00063241		4232.97	0.01534602
523.2	-0.03462755		1053.19	-0.00895114		1583.19	0.00651666		2113.18	0.00883429		2643.18	-0.00241598		3173.17	0.00163035		3703.17	0.00057839		4233.17	0.0153413
523.4	-0.03499874		1053.39	-0.00875058		1583.39	0.00611319		2113.38	0.00930979		2643.38	-0.00251492		3173.37	0.00283992		3703.37	0.00001869		4233.37	0.01533811
523.6	-0.0342816		1053.59	-0.00921776		1583.59	0.00502412		2113.58	0.00851947		2643.58	-0.00167647		3173.57	0.00341686		3703.57	-0.00053923		4233.57	0.01527638
523.8	-0.03409058		1053.79	-0.00979635		1583.79	0.00512017		2113.78	0.00820116		2643.78	-0.00125494		3173.77	0.00300402		3703.77	-0.00086169		4233.77	0.0156227
524	-0.03397282		1053.99	-0.00980691		1583.99	0.00512618		2113.98	0.00786256		2643.98	-0.00124736		3173.97	0.00215542		3703.97	-0.00150796		4233.97	0.01543133
524.2	-0.03361211		1054.19	-0.00985951		1584.19	0.00551808		2114.18	0.00755356		2644.18	-0.00096497		3174.17	0.00095851		3704.17	-0.00075916		4234.17	0.01443059
524.4	-0.03322446		1054.39	-0.00937247		1584.39	0.00605704		2114.38	0.00808072		2644.38	-0.00117074		3174.37	0.00066674		3704.37	-0.00009092		4234.37	0.0142139
524.6	-0.03302129		1054.59	-0.0089429		1584.59	0.00574842		2114.58	0.00815634		2644.58	0.00020507		3174.57	0.00094037		3704.57	0.00039282		4234.57	0.01332114
524.8	-0.0334384		1054.79	-0.00879628		1584.79	0.00585814		2114.78	0.00860171		2644.78	0.00095102		3174.77	-0.00064855		3704.77	0.00000607		4234.77	0.01268678
525	-0.03410901		1054.99	-0.0088832		1584.99	0.00684528		2114.98	0.00708205		2644.98	0.00203042		3174.97	-0.00055624		3704.97	0.00000056		4234.97	0.01201207
525.2	-0.03460919		1055.19	-0.00894464		1585.19	0.00836922		2115.18	0.00652263		2645.18	0.00222424		3175.17	-0.00101843		3705.17	-0.00025912		4235.17	0.01179363
525.4	-0.03387476		1055.39	-0.01005113		1585.39	0.00930466		2115.38	0.00681286		2645.38	0.00263269		3175.37	-0.00086364		3705.37	-0.0005463		4235.37	0.01191041
525.6	-0.0336889		1055.59	-0.0104201		1585.59	0.01093461		2115.58	0.00665109		2645.58	0.00276935		3175.57	-0.00076334		3705.57	-0.00098248		4235.57	0.01182613
525.8	-0.03332917		1055.79	-0.01030106		1585.79	0.01153097		2115.78	0.00744905		2645.78	0.00277865		3175.77	-0.00205318		3705.77	-0.00068746		4235.77	0.01145948
526	-0.0338589		1055.99	-0.0104335		1585.99	0.01237628		2115.98	0.00747748		2645.98	0.00311311		3175.97	-0.00228757		3705.97	-0.00088138		4235.97	0.01085454
526.2	-0.03504366		1056.19	-0.01046037		1586.19	0.0119641		2116.18	0.00782369		2646.18	0.00280398		3176.17	-0.00244706		3706.17	-0.00274031		4236.17	0.01081982
526.4	-0.03539213		1056.39	-0.01100154		1586.39	0.01245533		2116.38	0.00931764		2646.38	0.00241011		3176.37	-0.00172909		3706.37	-0.0025893		4236.37	0.01091902
526.6	-0.0358677		1056.59	-0.0116933		1586.59	0.01291974		2116.58	0.0085111		2646.58	0.00167027		3176.57	-0.00204912		3706.57	-0.00285251		4236.57	0.01090662
526.8	-0.03587536		1056.79	-0.01229384		1586.79	0.0125594		2116.78	0.00751445		2646.78	0.00108813		3176.77	-0.00219033		3706.77	-0.00295472		4236.77	0.01121232
527	-0.03638573		1056.99	-0.01218343		1586.99	0.01257569		2116.98	0.00816995		2646.98	0.00198875		3176.97	-0.00234192		3706.97	-0.0023639		4236.97	0.01231614
527.2	-0.03640263		1057.19	-0.01221571		1587.19	0.01317547		2117.18	0.0082216		2647.18	0.00215529		3177.17	-0.00136114		3707.17	-0.00223532		4237.17	0.0126923
527.4	-0.03643459		1057.39	-0.01204911		1587.39	0.01259814		2117.38	0.00800353		2647.38	0.00168381		3177.37	-0.0006445		3707.37	-0.00313105		4237.37	0.01266995
527.6	-0.035833		1057.59	-0.01217805		1587.59	0.01258702		2117.58	0.00744726		2647.58	0.00080503		3177.57	-0.00091356		3707.57	-0.00241117		4237.57	0.01377172
527.8	-0.03548535		1057.79	-0.01207784		1587.79	0.0124836		2117.78	0.00783152		2647.78	0.0001409		3177.77	-0.00137718		3707.77	-0.0020818		4237.77	0.01451733
528	-0.03544098		1057.99	-0.01123429		1587.99	0.01218369		2117.98	0.00788679		2647.98	-0.00023457		3177.97	-0.00194098		3707.97	-0.00124126		4237.97	0.01477841
528.2	-0.03520162		1058.19	-0.01113491		1588.19	0.0119066		2118.18	0.00753383		2648.18	-0.00024933		3178.17	-0.00251		3708.17	0.00008424		4238.17	0.01472239
528.4	-0.03518835		1058.39	-0.01054735		1588.39	0.01159192		2118.38	0.00769563		2648.38	-0.00069618		3178.37	-0.00202311		3708.37	0.00016689		4238.37	0.01525824
528.6	-0.0345974		1058.59	-0.01031271		1588.59	0.01171236		2118.58	0.00722721		2648.58	-0.0003609		3178.57	-0.00191193		3708.57	0.0008175		4238.57	0.0152595
528.8	-0.03471188		1058.79	-0.00958076		1588.79	0.01238149		2118.78	0.00711849		2648.78	-0.00131924		3178.77	-0.00138465		3708.77	0.00092341		4238.77	0.01544587
529	-0.03419862		1058.99	-0.00999804		1588.99	0.01287891		2118.98	0.00653704		2648.98	-0.00098545		3178.97	-0.00054881		3708.97	0.00109367		4238.97	0.0164165
529.2	-0.03352145		1059.19	-0.00923865		1589.19	0.01268775		2119.18	0.00688127		2649.18	-0.00129787		3179.17	-0.00050895		3709.17	0.00077922		4239.17	0.01608357
529.4	-0.03259985		1059.39	-0.00913578		1589.39	0.01213599		2119.38	0.00816907		2649.38	-0.00167607		3179.37	-0.0005602		3709.37	0.00103667		4239.37	0.01557584
529.6	-0.03285154		1059.59	-0.00870314		1589.59	0.01167233		2119.58	0.00859396		2649.58	-0.00115649		3179.57	-0.00057138		3709.57	0.00069439		4239.57	0.01531911
529.8	-0.03352143		1059.79	-0.00856739		1589.79	0.01062248		2119.78	0.00892115		2649.78	0.00052436		3179.77	-0.00051892		3709.77	0.00117207		4239.77	0.0138458
530	-0.03440261		1059.99	-0.00906428		1589.99	0.00977616		2119.98	0.00818918		2649.98	0.00076686		3179.97	-0.00039153		3709.97	0.0005458		4239.97	0.01300446
530.2	-0.03432802		1060.19	-0.00892357		1590.19	0.00872652		2120.18	0.00870335		2650.18	0.0007356		3180.17	0.00024116		3710.17	-0.0007061		4240.17	0.01242843
530.4	-0.03430914		1060.39	-0.00963218		1590.39	0.00824308		2120.38	0.00883571		2650.38	0.00132932		3180.37	0.00047269		3710.37	-0.00104538		4240.37	0.01256882
530.6	-0.03477066		1060.59	-0.01028073		1590.59	0.00773487		2120.58	0.00747494		2650.58	0.0015022		3180.57	0.00032708		3710.57	-0.00136227		4240.57	0.01229087
530.8	-0.03581763		1060.79	-0.01093338		1590.79	0.0061957		2120.78	0.00715259		2650.78	0.00159551		3180.77	0.0008033		3710.77	-0.00186431		4240.77	0.0123689
531	-0.03623532		1060.99	-0.01093865		1590.99	0.00593578		2120.98	0.00707169		2650.98	0.00264641		3180.97	0.00158861		3710.97	-0.00179173		4240.97	0.01177215
531.2	-0.03577141		1061.19	-0.01080047		1591.19	0.00563786		2121.18	0.00719178		2651.18	0.00256316		3181.17	0.0013934		3711.17	-0.00177276		4241.17	0.01122142
531.4	-0.03516345		1061.39	-0.01132573		1591.39	0.00562837		2121.38	0.00748819		2651.38	0.00177172		3181.37	0.00126008		3711.37	-0.00220397		4241.37	0.01154742
531.6	-0.03488705		1061.59	-0.01082512		1591.59	0.00502472		2121.58	0.00783105		2651.58	0.00039975		3181.57	0.00101155		3711.57	-0.00161247		4241.57	0.01198958
531.8	-0.03497032		1061.79	-0.01078552		1591.79	0.00517331		2121.78	0.00732015		2651.78	-0.00003586		3181.77	0.00050534		3711.77	-0.00095931		4241.77	0.01299663
532	-0.03572903		1061.99	-0.01052487		1591.99	0.00605016		2121.98	0.00677732		2651.98	-0.00093848		3181.97	0.00098647		3711.97	-0.00064788		4241.97	0.01288228
532.2	-0.03535014		1062.19	-0.01120087		1592.19	0.00644435		2122.18	0.00668857		2652.18	-0.00168226		3182.17	0.00154197		3712.17	-0.00097421		4242.17	0.01324856
532.4	-0.03608908		1062.39	-0.01151655		1592.39	0.00670596		2122.38	0.00707165		2652.38	-0.00306179		3182.37	0.00187144		3712.37	-0.00174599		4242.37	0.01333648
532.6	-0.03553254		1062.59	-0.01138846		1592.59	0.00802202		2122.58	0.00818551		2652.58	-0.00369185		3182.57	0.00169458		3712.57	-0.00149921		4242.57	0.01417085
532.8	-0.03507043		1062.79	-0.01203499		1592.79	0.00865527		2122.78	0.00932177		2652.78	-0.00526855		3182.77	0.0024458		3712.77	-0.00125573		4242.77	0.01439207
533	-0.03500411		1062.99	-0.01257269		1592.99	0.00927723		2122.98	0.00961458		2652.98	-0.0047642		3182.97	0.00159756		3712.97	-0.00082177		4242.97	0.01519714
533.2	-0.03593232		1063.19	-0.0121967		1593.19	0.00963788		2123.18	0.009034		2653.18	-0.00515047		3183.17	0.00166466		3713.17	-0.00037788		4243.17	0.01464152
533.4	-0.03561969		1063.39	-0.0122736		1593.39	0.01011454		2123.38	0.00953114		2653.38	-0.00510195		3183.37	0.00165278		3713.37	0.00035417		4243.37	0.01423833
533.6	-0.03532778		1063.59	-0.01195282		1593.59	0.00972014		2123.58	0.00837285		2653.58	-0.00478848		3183.57	0.00139015		3713.57	0.0000321		4243.57	0.01527779
533.8	-0.03541481		1063.79	-0.01147183		1593.79	0.00966067		2123.78	0.0077498		2653.78	-0.00418865		3183.77	0.00065533		3713.77	0.00031979		4243.77	0.01463852
534	-0.03527576		1063.99	-0.01119115		1593.99	0.00931484		2123.98	0.00690577		2653.98	-0.00450218		3183.97	0.00006829		3713.97	-0.00080853		4243.97	0.01429086
534.2	-0.0350973		1064.19	-0.01080343		1594.19	0.00881006		2124.18	0.00675361		2654.18	-0.00357971		3184.17	-0.00035358		3714.17	-0.00115517		4244.17	0.01495658
534.4	-0.03561871		1064.39	-0.01147575		1594.39	0.00884875		2124.38	0.006317		2654.38	-0.00403188		3184.37	-0.0009921		3714.37	-0.00112874		4244.37	0.0153578
534.6	-0.03609467		1064.59	-0.01129147		1594.59	0.00844541		2124.58	0.00555671		2654.58	-0.00322092		3184.57	-0.00062576		3714.57	-0.00091489		4244.57	0.01442324
534.8	-0.036323		1064.79	-0.01138084		1594.79	0.00781546		2124.78	0.00605558		2654.78	-0.00252564		3184.77	-0.00023565		3714.77	-0.00107666		4244.77	0.0145885
535	-0.03553789		1064.99	-0.01128733		1594.99	0.00833288		2124.98	0.00603871		2654.98	-0.00163454		3184.97	0.00015486		3714.97	-0.0013157		4244.97	0.01399148
535.2	-0.03487064		1065.19	-0.01117468		1595.19	0.00795681		2125.18	0.00633661		2655.18	-0.0015201		3185.17	-0.00058916		3715.17	-0.00034037		4245.17	0.01384011
535.4	-0.03473416		1065.39	-0.01136105		1595.39	0.0081371		2125.38	0.00679937		2655.38	-0.00194381		3185.37	-0.00017973		3715.37	-0.0007597		4245.37	0.01381814
535.6	-0.03545068		1065.59	-0.01081967		1595.59	0.0075021		2125.58	0.00633642		2655.58	-0.00196775		3185.57	0.00040973		3715.57	-0.0005631		4245.57	0.01341854
535.8	-0.03604896		1065.79	-0.0113866		1595.79	0.00791247		2125.78	0.00574665		2655.78	-0.00165686		3185.77	0.00038992		3715.77	-0.0003152		4245.77	0.01373821
536	-0.03656343		1065.99	-0.01107548		1595.99	0.00867925		2125.98	0.0053561		2655.98	-0.00140799		3185.97	0.00096818		3715.97	-0.00130737		4245.97	0.01261932
536.2	-0.03613057		1066.19	-0.0117436		1596.19	0.00832033		2126.18	0.00622305		2656.18	-0.00098162		3186.17	0.00081116		3716.17	-0.00159109		4246.17	0.01284549
536.4	-0.03665742		1066.39	-0.01165409		1596.39	0.00821833		2126.38	0.00711888		2656.38	-0.00167834		3186.37	0.00057744		3716.37	-0.00260435		4246.37	0.01250938
536.6	-0.03612911		1066.59	-0.01196795		1596.59	0.00781166		2126.58	0.00765533		2656.58	-0.0013374		3186.57	0.0009134		3716.57	-0.00171932		4246.57	0.0132473
536.8	-0.03613328		1066.79	-0.01270988		1596.79	0.00771629		2126.78	0.0073236		2656.78	-0.00142214		3186.77	0.00082617		3716.77	-0.00153503		4246.77	0.01319128
537	-0.03632565		1066.99	-0.0130384		1596.99	0.00792073		2126.98	0.0070927		2656.98	-0.00108462		3186.97	0.00099602		3716.97	-0.00132786		4246.97	0.01376395
537.2	-0.03685407		1067.19	-0.01292261		1597.19	0.00788767		2127.18	0.0068724		2657.18	-0.00136118		3187.17	0.00143826		3717.17	-0.00118301		4247.17	0.01260269
537.4	-0.03646097		1067.39	-0.01324276		1597.39	0.00759489		2127.38	0.00732589		2657.38	-0.00199632		3187.37	0.00212345		3717.37	-0.00178869		4247.37	0.01302715
537.6	-0.03619016		1067.59	-0.01350032		1597.59	0.00777147		2127.58	0.00671781		2657.58	-0.00203388		3187.57	0.00187544		3717.57	-0.00253254		4247.57	0.01428313
537.8	-0.03621509		1067.79	-0.01319269		1597.79	0.00744571		2127.78	0.00625802		2657.78	-0.00198487		3187.77	0.00195009		3717.77	-0.00223359		4247.77	0.01402796
538	-0.03615556		1067.99	-0.01385294		1597.99	0.00685988		2127.98	0.00663653		2657.98	-0.00211516		3187.97	0.00243333		3717.97	-0.00261509		4247.97	0.01455442
538.2	-0.03568547		1068.19	-0.01371728		1598.19	0.0069926		2128.18	0.0063374		2658.18	-0.00238917		3188.17	0.00261964		3718.17	-0.00168072		4248.17	0.01536199
538.4	-0.03510417		1068.39	-0.01381442		1598.39	0.00719864		2128.38	0.00625273		2658.38	-0.00303652		3188.37	0.00276085		3718.37	-0.00179832		4248.37	0.01450781
538.6	-0.0350104		1068.59	-0.01332927		1598.59	0.00713624		2128.58	0.00612967		2658.58	-0.00198821		3188.57	0.00365098		3718.57	-0.00191091		4248.57	0.01355643
538.8	-0.0343349		1068.79	-0.01288704		1598.79	0.00736971		2128.78	0.00682738		2658.78	-0.00257004		3188.77	0.00431049		3718.77	-0.00228887		4248.77	0.01369391
539	-0.0337777		1068.99	-0.01147464		1598.99	0.00847406		2128.98	0.00581225		2658.98	-0.00201122		3188.97	0.00461229		3718.97	-0.00152501		4248.97	0.01349815
539.2	-0.03340451		1069.19	-0.01038898		1599.19	0.00887263		2129.18	0.00533235		2659.18	-0.00149509		3189.17	0.00390866		3719.17	-0.00095239		4249.17	0.0135294
539.4	-0.03375366		1069.39	-0.0088868		1599.39	0.00921353		2129.38	0.00494623		2659.38	-0.00107311		3189.37	0.00391472		3719.37	-0.00137123		4249.37	0.01353119
539.6	-0.03395724		1069.59	-0.00763005		1599.59	0.00909794		2129.58	0.00428167		2659.58	-0.00056037		3189.57	0.00288058		3719.57	-0.00094117		4249.57	0.01311969
539.8	-0.03326216		1069.79	-0.00689741		1599.79	0.00965137		2129.78	0.00465392		2659.78	-0.00016418		3189.77	0.00178077		3719.77	-0.00043477		4249.77	0.01366103
540	-0.03283476		1069.99	-0.00613429		1599.99	0.00998417		2129.98	0.00431804		2659.98	0.00047981		3189.97	0.00098323		3719.97	-0.00059423		4249.97	0.01351762
540.2	-0.03228331		1070.19	-0.00619364		1600.19	0.00956022		2130.18	0.00544789		2660.18	0.00043245		3190.17	0.00068768		3720.17	-0.00094927		4250.17	0.01356578
540.4	-0.03230812		1070.39	-0.00526741		1600.39	0.00939908		2130.38	0.00587151		2660.38	0.00008281		3190.37	-0.00057939		3720.37	-0.0000387		4250.37	0.01389385
540.6	-0.03237766		1070.59	-0.0057182		1600.59	0.00910216		2130.58	0.00547175		2660.58	0.00074147		3190.57	-0.00128171		3720.57	0.00084001		4250.57	0.01397562
540.8	-0.03184133		1070.79	-0.00638945		1600.79	0.00981828		2130.78	0.00489797		2660.78	0.00095422		3190.77	-0.00160895		3720.77	0.00045479		4250.77	0.01343339
541	-0.0319806		1070.99	-0.0073749		1600.99	0.00946257		2130.98	0.00459014		2660.98	0.00112047		3190.97	-0.00121677		3720.97	-0.00012877		4250.97	0.01349687
541.2	-0.03254551		1071.19	-0.00804813		1601.19	0.00917525		2131.18	0.00436931		2661.18	0.00130723		3191.17	-0.00076463		3721.17	-0.0001408		4251.17	0.0128987
541.4	-0.03311005		1071.39	-0.00943907		1601.39	0.00845409		2131.38	0.00375069		2661.38	0.00095481		3191.37	-0.00015513		3721.37	-0.00116804		4251.37	0.01302779
541.6	-0.03326462		1071.59	-0.01024435		1601.59	0.00792738		2131.58	0.00295257		2661.58	0.00141529		3191.57	-0.00006601		3721.57	-0.00090624		4251.57	0.01304596
541.8	-0.03348516		1071.79	-0.01041973		1601.79	0.00701625		2131.78	0.00302663		2661.78	0.0002788		3191.77	0.00050541		3721.77	-0.0014461		4251.77	0.01254267
542	-0.03431343		1071.99	-0.01108798		1601.99	0.00697646		2131.98	0.00369781		2661.98	-0.00040462		3191.97	0.00019657		3721.97	-0.00232271		4251.97	0.01226618
542.2	-0.03396212		1072.19	-0.01114323		1602.19	0.00683287		2132.18	0.00289322		2662.18	-0.00094811		3192.17	-0.00024791		3722.17	-0.00213098		4252.17	0.01205758
542.4	-0.03403137		1072.39	-0.01171968		1602.39	0.00653165		2132.38	0.00304501		2662.38	-0.00135245		3192.37	-0.0001415		3722.37	-0.00347948		4252.37	0.01184
542.6	-0.03411579		1072.59	-0.01146558		1602.59	0.00656273		2132.58	0.00316656		2662.58	-0.00118653		3192.57	0.00048712		3722.57	-0.00374816		4252.57	0.01272196
542.8	-0.03394174		1072.79	-0.01091096		1602.79	0.00671973		2132.78	0.00423307		2662.78	-0.00186726		3192.77	0.00077473		3722.77	-0.00424786		4252.77	0.01460848
543	-0.0344688		1072.99	-0.01025145		1602.99	0.00739616		2132.98	0.00434908		2662.98	-0.00140249		3192.97	0.0011349		3722.97	-0.00370639		4252.97	0.01503594
543.2	-0.03482775		1073.19	-0.00948901		1603.19	0.00697655		2133.18	0.00445236		2663.18	-0.00166831		3193.17	0.00025083		3723.17	-0.00354515		4253.17	0.01555967
543.4	-0.03481377		1073.39	-0.00966014		1603.39	0.00731218		2133.38	0.00566581		2663.38	-0.00203941		3193.37	0.00011899		3723.37	-0.00315451		4253.37	0.01460538
543.6	-0.03501271		1073.59	-0.00964073		1603.59	0.00759633		2133.58	0.00646938		2663.58	-0.00182464		3193.57	-0.00003628		3723.57	-0.00214798		4253.57	0.01508895
543.8	-0.03476299		1073.79	-0.00988112		1603.79	0.00824593		2133.78	0.00742494		2663.78	-0.00168369		3193.77	-0.00005203		3723.77	-0.00216865		4253.77	0.01572511
544	-0.03464169		1073.99	-0.01046502		1603.99	0.00900393		2133.98	0.00728951		2663.98	-0.00167468		3193.97	-0.00038769		3723.97	-0.00142534		4253.97	0.01551996
544.2	-0.03463996		1074.19	-0.01058444		1604.19	0.00941068		2134.18	0.00787678		2664.18	-0.00191686		3194.17	-0.00078018		3724.17	-0.00039886		4254.17	0.01554159
544.4	-0.03434944		1074.39	-0.01086436		1604.39	0.00909749		2134.38	0.00803957		2664.38	-0.00212886		3194.37	-0.00182134		3724.37	0.00115586		4254.37	0.01527481
544.6	-0.03443025		1074.59	-0.01173271		1604.59	0.00892607		2134.58	0.0078396		2664.58	-0.00216977		3194.57	-0.00196526		3724.57	0.00108645		4254.57	0.0140458
544.8	-0.0345397		1074.79	-0.01212638		1604.79	0.00850415		2134.78	0.0085844		2664.78	-0.00179107		3194.77	-0.00211602		3724.77	0.00042504		4254.77	0.01335235
545	-0.03466531		1074.99	-0.01262366		1604.99	0.0075273		2134.98	0.00979928		2664.98	-0.00147746		3194.97	-0.00215286		3724.97	0.00045237		4254.97	0.01408616
545.2	-0.03523756		1075.19	-0.01262488		1605.19	0.00723297		2135.18	0.01023264		2665.18	-0.00160979		3195.17	-0.00164488		3725.17	0.00029771		4255.17	0.01344197
545.4	-0.03676148		1075.39	-0.01307121		1605.39	0.00641735		2135.38	0.01056004		2665.38	-0.00135646		3195.37	-0.00283977		3725.37	0.00061041		4255.37	0.01180999
545.6	-0.03738787		1075.59	-0.013312		1605.59	0.00608135		2135.58	0.01094373		2665.58	-0.00156448		3195.57	-0.0029825		3725.57	0.00037774		4255.57	0.01133347
545.8	-0.03759258		1075.79	-0.01347826		1605.79	0.00559414		2135.78	0.0117042		2665.78	-0.00250619		3195.77	-0.00353518		3725.77	-0.00026983		4255.77	0.01071798
546	-0.03804404		1075.99	-0.01288669		1605.99	0.00603518		2135.98	0.01154314		2665.98	-0.002651		3195.97	-0.00331307		3725.97	-0.0007325		4255.97	0.01021272
546.2	-0.03853419		1076.19	-0.01343973		1606.19	0.00509039		2136.18	0.0112629		2666.18	-0.00230946		3196.17	-0.0027743		3726.17	-0.00159622		4256.17	0.00991054
546.4	-0.03834086		1076.39	-0.01262176		1606.39	0.00489987		2136.38	0.01111144		2666.38	-0.00183445		3196.37	-0.00148771		3726.37	-0.0024457		4256.37	0.01062503
546.6	-0.03853788		1076.59	-0.0120371		1606.59	0.00515606		2136.58	0.0104795		2666.58	-0.00186261		3196.57	-0.00081299		3726.57	-0.0025937		4256.57	0.01124006
546.8	-0.03894239		1076.79	-0.01195926		1606.79	0.00520053		2136.78	0.0102905		2666.78	-0.00242827		3196.77	-0.00005193		3726.77	-0.00289435		4256.77	0.01175509
547	-0.03905293		1076.99	-0.01173743		1606.99	0.0045897		2136.98	0.00865827		2666.98	-0.00223815		3196.97	0.00041639		3726.97	-0.0033191		4256.97	0.01065609
547.2	-0.03916275		1077.19	-0.01166562		1607.19	0.00484063		2137.18	0.00745591		2667.18	-0.00261592		3197.17	0.00005663		3727.17	-0.00393294		4257.17	0.01150603
547.4	-0.03964361		1077.39	-0.01206956		1607.39	0.00530798		2137.38	0.00744968		2667.38	-0.0018935		3197.37	0.00067888		3727.37	-0.00477815		4257.37	0.01128185
547.6	-0.0405156		1077.59	-0.01163876		1607.59	0.00580292		2137.58	0.00512767		2667.58	-0.00194689		3197.57	0.00060612		3727.57	-0.00487772		4257.57	0.01200355
547.8	-0.04040367		1077.79	-0.01207736		1607.79	0.00605436		2137.78	0.00370585		2667.78	-0.00168684		3197.77	-0.00021048		3727.77	-0.00446267		4257.77	0.01222683
548	-0.0400584		1077.99	-0.01305328		1607.99	0.00611354		2137.98	0.00225933		2667.98	-0.00248453		3197.97	-0.0002067		3727.97	-0.00386778		4257.97	0.01277173
548.2	-0.03972532		1078.19	-0.01325903		1608.19	0.00543029		2138.18	0.00214467		2668.18	-0.00299039		3198.17	-0.00013393		3728.17	-0.00459112		4258.17	0.01239366
548.4	-0.03839468		1078.39	-0.01354835		1608.39	0.00431929		2138.38	0.00173069		2668.38	-0.00277709		3198.37	-0.00045294		3728.37	-0.0048428		4258.37	0.01216723
548.6	-0.03759226		1078.59	-0.0144387		1608.59	0.00467656		2138.58	0.00204631		2668.58	-0.00229288		3198.57	-0.0014295		3728.57	-0.00451812		4258.57	0.01296043
548.8	-0.03668117		1078.79	-0.01451095		1608.79	0.00457589		2138.78	0.00333761		2668.78	-0.00221762		3198.77	-0.00178728		3728.77	-0.00496366		4258.77	0.01358198
549	-0.03579856		1078.99	-0.01526856		1608.99	0.00464482		2138.98	0.00419529		2668.98	-0.00299063		3198.97	-0.00136532		3728.97	-0.00346661		4258.97	0.01472086
549.2	-0.03601786		1079.19	-0.01580552		1609.19	0.00455591		2139.18	0.0046062		2669.18	-0.00316584		3199.17	-0.00169523		3729.17	-0.00304873		4259.17	0.01454353
549.4	-0.03548413		1079.39	-0.01647381		1609.39	0.00417861		2139.38	0.0060125		2669.38	-0.00299514		3199.37	-0.00267513		3729.37	-0.00247091		4259.37	0.01393001
549.6	-0.0345056		1079.59	-0.01732899		1609.59	0.00412349		2139.58	0.00602465		2669.58	-0.00373703		3199.57	-0.00163186		3729.57	-0.00217629		4259.57	0.01394661
549.8	-0.03383406		1079.79	-0.01723131		1609.79	0.00443658		2139.78	0.0066173		2669.78	-0.00426139		3199.77	-0.00113004		3729.77	-0.00147496		4259.77	0.01348643
550	-0.03429938		1079.99	-0.01675877		1609.99	0.00548601		2139.98	0.00728005		2669.98	-0.00377859		3199.97	-0.00071603		3729.97	-0.00232522		4259.97	0.01287969
550.2	-0.0341137		1080.19	-0.01558949		1610.19	0.00615817		2140.18	0.00730865		2670.18	-0.00375847		3200.17	-0.00114018		3730.17	-0.00223229		4260.17	0.01240355
550.4	-0.0335381		1080.39	-0.01412616		1610.39	0.00685942		2140.38	0.00704631		2670.38	-0.00346307		3200.37	-0.00122494		3730.37	-0.00212704		4260.37	0.01254034
550.6	-0.03414411		1080.59	-0.01417556		1610.59	0.00722933		2140.58	0.00740166		2670.58	-0.00441071		3200.57	-0.00162277		3730.57	-0.00163792		4260.57	0.0121886
550.8	-0.03479671		1080.79	-0.01386785		1610.79	0.0070441		2140.78	0.00717681		2670.78	-0.00436254		3200.77	-0.00136409		3730.77	-0.00182824		4260.77	0.01178073
551	-0.03563559		1080.99	-0.01387907		1610.99	0.00687582		2140.98	0.00685276		2670.98	-0.00484915		3200.97	-0.00141425		3730.97	-0.00216524		4260.97	0.01153148
551.2	-0.03700181		1081.19	-0.01350873		1611.19	0.00752658		2141.18	0.00789957		2671.18	-0.00454965		3201.17	-0.00226645		3731.17	-0.00191221		4261.17	0.0118706
551.4	-0.03820051		1081.39	-0.0130334		1611.39	0.00748464		2141.38	0.00763981		2671.38	-0.0034308		3201.37	-0.00300291		3731.37	-0.00188397		4261.37	0.01152885
551.6	-0.04041264		1081.59	-0.01301622		1611.59	0.00777448		2141.58	0.00758784		2671.58	-0.00413891		3201.57	-0.00333002		3731.57	-0.00132454		4261.57	0.01152448
551.8	-0.04082056		1081.79	-0.0126243		1611.79	0.00739864		2141.78	0.00742497		2671.78	-0.00326067		3201.77	-0.003853		3731.77	-0.00148553		4261.77	0.01135152
552	-0.04090052		1081.99	-0.01221844		1611.99	0.00673412		2141.98	0.00678488		2671.98	-0.00421135		3201.97	-0.00358995		3731.97	-0.00223252		4261.97	0.01136125
552.2	-0.04080233		1082.19	-0.01161599		1612.19	0.00640266		2142.18	0.00673921		2672.18	-0.00272974		3202.17	-0.00329312		3732.17	-0.00233879		4262.17	0.01099596
552.4	-0.04017531		1082.39	-0.01134088		1612.39	0.00574151		2142.38	0.0055339		2672.38	-0.00187376		3202.37	-0.00286933		3732.37	-0.00208515		4262.37	0.01145792
552.6	-0.04041155		1082.59	-0.0119288		1612.59	0.00526652		2142.58	0.00532863		2672.58	-0.00153383		3202.57	-0.00301532		3732.57	-0.00119196		4262.57	0.01248062
552.8	-0.04029719		1082.79	-0.01086792		1612.79	0.00453924		2142.78	0.00543067		2672.78	-0.00091842		3202.77	-0.00191047		3732.77	-0.00139056		4262.77	0.01216392
553	-0.04041574		1082.99	-0.01136405		1612.99	0.00447873		2142.98	0.00571028		2672.98	-0.00068787		3202.97	-0.00143933		3732.97	-0.00060258		4262.97	0.01232227
553.2	-0.0400624		1083.19	-0.01223931		1613.19	0.00347798		2143.18	0.00581957		2673.18	-0.00054985		3203.17	-0.00027066		3733.17	-0.0005279		4263.17	0.01305335
553.4	-0.03903847		1083.39	-0.01229021		1613.39	0.003376		2143.38	0.00543987		2673.38	-0.00065509		3203.37	0.00039484		3733.37	-0.00101639		4263.37	0.01319401
553.6	-0.03870315		1083.59	-0.01313228		1613.59	0.00393866		2143.58	0.00526877		2673.58	-0.00096546		3203.57	0.001637		3733.57	-0.00092841		4263.57	0.01301991
553.8	-0.03832961		1083.79	-0.0127434		1613.79	0.00402057		2143.78	0.00509304		2673.78	-0.00160384		3203.77	0.00140165		3733.77	-0.00154601		4263.77	0.0133634
554	-0.03903586		1083.99	-0.01238128		1613.99	0.00497999		2143.98	0.00552704		2673.98	-0.00135749		3203.97	0.00087231		3733.97	-0.00288196		4263.97	0.0133134
554.2	-0.03856902		1084.19	-0.01166611		1614.19	0.00592011		2144.18	0.00512688		2674.18	-0.00119346		3204.17	0.00046614		3734.17	-0.00327847		4264.17	0.0135505
554.4	-0.03876212		1084.39	-0.01242723		1614.39	0.00589626		2144.38	0.0050525		2674.38	-0.00109993		3204.37	0.00098127		3734.37	-0.00328157		4264.37	0.01305244
554.6	-0.03894023		1084.59	-0.01280906		1614.59	0.00522822		2144.58	0.00573955		2674.58	-0.00155244		3204.57	0.00141669		3734.57	-0.0033294		4264.57	0.01325026
554.8	-0.03922405		1084.79	-0.01252409		1614.79	0.00515559		2144.78	0.00487442		2674.78	-0.00184446		3204.77	0.00059736		3734.77	-0.00392124		4264.77	0.01297668
555	-0.03841453		1084.99	-0.01350108		1614.99	0.00487185		2144.98	0.00520138		2674.98	-0.00207961		3204.97	-0.00018826		3734.97	-0.00454811		4264.97	0.01295127
555.2	-0.03855608		1085.19	-0.0136314		1615.19	0.00492596		2145.18	0.00662188		2675.18	-0.00180934		3205.17	-0.00203282		3735.17	-0.00480778		4265.17	0.01364115
555.4	-0.03868137		1085.39	-0.01361422		1615.39	0.00592335		2145.38	0.00658162		2675.38	-0.00217698		3205.37	-0.00227589		3735.37	-0.00478829		4265.37	0.01350699
555.6	-0.03933151		1085.59	-0.01305316		1615.59	0.00619359		2145.58	0.00709124		2675.58	-0.00319724		3205.57	-0.0028438		3735.57	-0.00547686		4265.57	0.0129119
555.8	-0.038623		1085.79	-0.01242507		1615.79	0.00586585		2145.78	0.00625553		2675.78	-0.00309862		3205.77	-0.00346234		3735.77	-0.00585716		4265.77	0.01244256
556	-0.03774187		1085.99	-0.012086		1615.99	0.00512138		2145.98	0.00538077		2675.98	-0.00358108		3205.97	-0.00301367		3735.97	-0.00512904		4265.97	0.01237555
556.2	-0.03810028		1086.19	-0.01241189		1616.19	0.00497318		2146.18	0.00540214		2676.18	-0.00243891		3206.17	-0.00330815		3736.17	-0.00462731		4266.17	0.01195756
556.4	-0.03802703		1086.39	-0.01273751		1616.39	0.00516431		2146.38	0.00447085		2676.38	-0.00311442		3206.37	-0.00280904		3736.37	-0.00463118		4266.37	0.01195628
556.6	-0.03866103		1086.59	-0.01327681		1616.59	0.00441908		2146.58	0.00392278		2676.58	-0.00293609		3206.57	-0.00269764		3736.57	-0.00406552		4266.57	0.01165877
556.8	-0.03926578		1086.79	-0.0132011		1616.79	0.00421914		2146.78	0.00428308		2676.78	-0.00294101		3206.77	-0.0023367		3736.77	-0.0040138		4266.77	0.01079416
557	-0.03897823		1086.99	-0.01441622		1616.99	0.00482531		2146.98	0.00386481		2676.98	-0.00330824		3206.97	-0.00277642		3736.97	-0.0039065		4266.97	0.01034168
557.2	-0.03918786		1087.19	-0.01476479		1617.19	0.0041124		2147.18	0.003715		2677.18	-0.00438951		3207.17	-0.00220684		3737.17	-0.00340911		4267.17	0.01058135
557.4	-0.04013762		1087.39	-0.01474563		1617.39	0.00514438		2147.38	0.00346654		2677.38	-0.00424809		3207.37	-0.00213003		3737.37	-0.00435698		4267.37	0.01013885
557.6	-0.04062682		1087.59	-0.01525318		1617.59	0.00601348		2147.58	0.00400975		2677.58	-0.00428833		3207.57	-0.00191318		3737.57	-0.00454812		4267.57	0.00952415
557.8	-0.04114841		1087.79	-0.01520194		1617.79	0.00612666		2147.78	0.00370238		2677.78	-0.004227		3207.77	-0.00143278		3737.77	-0.00438708		4267.77	0.01003174
558	-0.0416308		1087.99	-0.0153104		1617.99	0.00708816		2147.98	0.00408448		2677.98	-0.00337071		3207.97	-0.00077896		3737.97	-0.00450167		4267.97	0.0101111
558.2	-0.04136826		1088.19	-0.01554727		1618.19	0.0074913		2148.18	0.00404106		2678.18	-0.00279402		3208.17	-0.00039168		3738.17	-0.00445859		4268.17	0.01054192
558.4	-0.04132398		1088.39	-0.01591785		1618.39	0.0074078		2148.38	0.00421996		2678.38	-0.0028529		3208.37	0.00037346		3738.37	-0.00422604		4268.37	0.01054164
558.6	-0.04092893		1088.59	-0.01609403		1618.59	0.00693593		2148.58	0.00480946		2678.58	-0.00286383		3208.57	-0.00007275		3738.57	-0.00480985		4268.57	0.01099269
558.8	-0.04058634		1088.79	-0.01639748		1618.79	0.00729651		2148.78	0.00512693		2678.78	-0.0032984		3208.77	-0.00099932		3738.77	-0.00513005		4268.77	0.01098472
559	-0.03981856		1088.99	-0.01732183		1618.99	0.00735234		2148.98	0.00635752		2678.98	-0.00339805		3208.97	-0.00082566		3738.97	-0.00555971		4268.97	0.01147556
559.2	-0.03975058		1089.19	-0.01741057		1619.19	0.00770339		2149.18	0.007784		2679.18	-0.00383329		3209.17	-0.00133294		3739.17	-0.00521233		4269.17	0.01192466
559.4	-0.03926035		1089.39	-0.01736115		1619.39	0.00806351		2149.38	0.00847864		2679.38	-0.00396861		3209.37	-0.00119384		3739.37	-0.00506459		4269.37	0.01143975
559.6	-0.03875063		1089.59	-0.01741375		1619.59	0.00751453		2149.58	0.00910882		2679.58	-0.00454583		3209.57	-0.00201816		3739.57	-0.00557155		4269.57	0.01142624
559.8	-0.03804606		1089.79	-0.01794693		1619.79	0.00688226		2149.78	0.00964466		2679.78	-0.00478095		3209.77	-0.00208755		3739.77	-0.00504317		4269.77	0.01148194
