# Supplementary material for: Functional development of a V3/glycan-specific broadly neutralizing antibody isolated from a case of HIV superinfection
Source: eLife journal article supplement (doi:10.7554/elife.68110), 2021-07-15
Supplement: fig4-data2 [file ExcelReport.xls]

## Sheet: Experiment Summary
C:\Users\Labuser\Desktop\Overbaugh_lab\Mackenzie Shipley\QA013.2 Lineage\QA013.2_Lineage Replicates_BG505 SOSIP trimer
ExpDescription: Unassigned
ExperimentType: KINETICS
StartDateTime: 1/28/2021 3:04:49 PM
MachineName: 886RGX1
UserName: Labuser
PlateName: 210128
PlateName2: Unassigned
Instrument Type: OctetRED96
210128_001.frd (A3)
210128_002.frd (B3)
210128_003.frd (C3)
210128_004.frd (D3)
210128_005.frd (E3)
210128_006.frd (F3)
210128_007.frd (G3)
210128_008.frd (H3)
210128_009.frd (A4)
210128_010.frd (B4)
210128_011.frd (C4)
210128_012.frd (D4)
210128_013.frd (E4)
210128_014.frd (F4)
210128_015.frd (G4)
210128_016.frd (H4)
210128_ExpMethod.fmf
N	Data Name	Assay Time	Flow Rate	Step Type Name	Step Type		Assay Step Number	Step Data Name	Sensor Column	Sample Column	Step Type	Assay Time
1	Baseline	30	1000	Baseline	2		1	Baseline	1	1	Baseline	30
2	Association	180	600	Association	0		2	Regeneration	1	11	Regeneration	5
3	Dissociation	180	600	Dissociation	1		3	Baseline	1	1	Baseline	30
4	Loading	80	600	Loading	3		4	Loading	1	2	Loading	80
5	Regeneration	5	1000	Regeneration	6		5	Baseline	1	1	Baseline	30
							6	Association	1	10	Association	180
							7	Dissociation	1	1	Dissociation	180
							8	Regeneration	1	11	Regeneration	5
							9	Baseline	1	1	Baseline	30
							10	Loading	1	3	Loading	80
							11	Baseline	1	1	Baseline	30
							12	Association	1	10	Association	180
							13	Dissociation	1	1	Dissociation	180
							14	Regeneration	1	11	Regeneration	5
							15	Baseline	1	1	Baseline	30
							16	Loading	1	4	Loading	80
							17	Baseline	1	1	Baseline	30
							18	Association	1	10	Association	180
							19	Dissociation	1	1	Dissociation	180
							20	Regeneration	1	11	Regeneration	5
							21	Baseline	1	1	Baseline	30
							22	Loading	1	5	Loading	80
							23	Baseline	1	1	Baseline	30
							24	Association	1	10	Association	180
							25	Dissociation	1	1	Dissociation	180
							26	Regeneration	1	11	Regeneration	5
							27	Baseline	1	1	Baseline	30
							28	Loading	1	6	Loading	80
							29	Baseline	1	1	Baseline	30
							30	Association	1	10	Association	180
							31	Dissociation	1	1	Dissociation	180
							32	Regeneration	1	11	Regeneration	5
							33	Baseline	1	1	Baseline	30
							34	Loading	1	7	Loading	80
							35	Baseline	1	1	Baseline	30
							36	Association	1	10	Association	180
							37	Dissociation	1	1	Dissociation	180
							38	Regeneration	1	11	Regeneration	5
							39	Baseline	1	1	Baseline	30
							40	Loading	1	8	Loading	80
							41	Baseline	1	1	Baseline	30
							42	Association	1	10	Association	180
							43	Dissociation	1	1	Dissociation	180
							44	Regeneration	1	11	Regeneration	5
							45	Baseline	1	1	Baseline	30
							46	Loading	1	9	Loading	80
							47	Baseline	1	1	Baseline	30
							48	Association	1	10	Association	180
							49	Dissociation	1	1	Dissociation	180
							50	Regeneration	1	11	Regeneration	5
							51	Baseline	2	1	Baseline	30
							52	Regeneration	2	11	Regeneration	5
							53	Baseline	2	1	Baseline	30
							54	Loading	2	1	Loading	80
							55	Baseline	2	1	Baseline	30
							56	Association	2	10	Association	180
							57	Dissociation	2	1	Dissociation	180
							58	Regeneration	2	11	Regeneration	5
							59	Baseline	2	1	Baseline	30
							60	Loading	2	1	Loading	80
							61	Baseline	2	1	Baseline	30
							62	Association	2	10	Association	180
							63	Dissociation	2	1	Dissociation	180
							64	Regeneration	2	11	Regeneration	5
							65	Baseline	2	1	Baseline	30
							66	Loading	2	1	Loading	80
							67	Baseline	2	1	Baseline	30
							68	Association	2	10	Association	180
							69	Dissociation	2	1	Dissociation	180
							70	Regeneration	2	11	Regeneration	5
							71	Baseline	2	1	Baseline	30
							72	Loading	2	1	Loading	80
							73	Baseline	2	1	Baseline	30
							74	Association	2	10	Association	180
							75	Dissociation	2	1	Dissociation	180
							76	Regeneration	2	11	Regeneration	5
							77	Baseline	2	1	Baseline	30
							78	Loading	2	1	Loading	80
							79	Baseline	2	1	Baseline	30
							80	Association	2	10	Association	180
							81	Dissociation	2	1	Dissociation	180
							82	Regeneration	2	11	Regeneration	5
							83	Baseline	2	1	Baseline	30
							84	Loading	2	1	Loading	80
							85	Baseline	2	1	Baseline	30
							86	Association	2	10	Association	180
							87	Dissociation	2	1	Dissociation	180
							88	Regeneration	2	11	Regeneration	5
							89	Baseline	2	1	Baseline	30
							90	Loading	2	1	Loading	80
							91	Baseline	2	1	Baseline	30
							92	Association	2	10	Association	180
							93	Dissociation	2	1	Dissociation	180
							94	Regeneration	2	11	Regeneration	5
							95	Baseline	2	1	Baseline	30
							96	Loading	2	1	Loading	80
							97	Baseline	2	1	Baseline	30
							98	Association	2	10	Association	180
							99	Dissociation	2	1	Dissociation	180
							100	Regeneration	2	11	Regeneration	5
Report Info
SW Name: Octet DataAnalysis
SW Version: 11.1.2.9
Date/Time: 1/28/2021 6:17:10 PM

## Sheet: Sensor Tray
Assay Table					Sensor Location and File Name
Step	Step Name	Step Type	Step Time		Number	Sensor Location	Sensor Type	Sensor Info	File Name
1	Baseline	BASELINE	30		1	A3	AHC (Anti-hIgG Fc Capture)		C:\Users\Labuser\Desktop\Overbaugh_lab\Mackenzie Shipley\QA013.2 Lineage\QA013.2_Lineage Replicates_BG505 SOSIP trimer\210128_001.frd
2	Regeneration	KREGENERATION	5		2	B3	AHC (Anti-hIgG Fc Capture)		C:\Users\Labuser\Desktop\Overbaugh_lab\Mackenzie Shipley\QA013.2 Lineage\QA013.2_Lineage Replicates_BG505 SOSIP trimer\210128_002.frd
3	Regeneration	KREGENERATION	5		3	C3	AHC (Anti-hIgG Fc Capture)		C:\Users\Labuser\Desktop\Overbaugh_lab\Mackenzie Shipley\QA013.2 Lineage\QA013.2_Lineage Replicates_BG505 SOSIP trimer\210128_003.frd
4	Regeneration	KREGENERATION	5		4	D3	AHC (Anti-hIgG Fc Capture)		C:\Users\Labuser\Desktop\Overbaugh_lab\Mackenzie Shipley\QA013.2 Lineage\QA013.2_Lineage Replicates_BG505 SOSIP trimer\210128_004.frd
5	Regeneration	KREGENERATION	5		5	E3	AHC (Anti-hIgG Fc Capture)		C:\Users\Labuser\Desktop\Overbaugh_lab\Mackenzie Shipley\QA013.2 Lineage\QA013.2_Lineage Replicates_BG505 SOSIP trimer\210128_005.frd
6	Regeneration	KREGENERATION	5		6	F3	AHC (Anti-hIgG Fc Capture)		C:\Users\Labuser\Desktop\Overbaugh_lab\Mackenzie Shipley\QA013.2 Lineage\QA013.2_Lineage Replicates_BG505 SOSIP trimer\210128_006.frd
7	Regeneration	KREGENERATION	5		7	G3	AHC (Anti-hIgG Fc Capture)		C:\Users\Labuser\Desktop\Overbaugh_lab\Mackenzie Shipley\QA013.2 Lineage\QA013.2_Lineage Replicates_BG505 SOSIP trimer\210128_007.frd
8	Baseline	BASELINE	30		8	H3	AHC (Anti-hIgG Fc Capture)		C:\Users\Labuser\Desktop\Overbaugh_lab\Mackenzie Shipley\QA013.2 Lineage\QA013.2_Lineage Replicates_BG505 SOSIP trimer\210128_008.frd
9	Loading	LOADING	80		9	A4	AHC (Anti-hIgG Fc Capture)		C:\Users\Labuser\Desktop\Overbaugh_lab\Mackenzie Shipley\QA013.2 Lineage\QA013.2_Lineage Replicates_BG505 SOSIP trimer\210128_009.frd
10	Baseline	BASELINE	30		10	B4	AHC (Anti-hIgG Fc Capture)		C:\Users\Labuser\Desktop\Overbaugh_lab\Mackenzie Shipley\QA013.2 Lineage\QA013.2_Lineage Replicates_BG505 SOSIP trimer\210128_010.frd
11	Association	ASSOC	180		11	C4	AHC (Anti-hIgG Fc Capture)		C:\Users\Labuser\Desktop\Overbaugh_lab\Mackenzie Shipley\QA013.2 Lineage\QA013.2_Lineage Replicates_BG505 SOSIP trimer\210128_011.frd
12	Dissociation	DISASSOC	180		12	D4	AHC (Anti-hIgG Fc Capture)		C:\Users\Labuser\Desktop\Overbaugh_lab\Mackenzie Shipley\QA013.2 Lineage\QA013.2_Lineage Replicates_BG505 SOSIP trimer\210128_012.frd
13	Regeneration	KREGENERATION	5		13	E4	AHC (Anti-hIgG Fc Capture)		C:\Users\Labuser\Desktop\Overbaugh_lab\Mackenzie Shipley\QA013.2 Lineage\QA013.2_Lineage Replicates_BG505 SOSIP trimer\210128_013.frd
14	Regeneration	KREGENERATION	5		14	F4	AHC (Anti-hIgG Fc Capture)		C:\Users\Labuser\Desktop\Overbaugh_lab\Mackenzie Shipley\QA013.2 Lineage\QA013.2_Lineage Replicates_BG505 SOSIP trimer\210128_014.frd
15	Regeneration	KREGENERATION	5		15	G4	AHC (Anti-hIgG Fc Capture)		C:\Users\Labuser\Desktop\Overbaugh_lab\Mackenzie Shipley\QA013.2 Lineage\QA013.2_Lineage Replicates_BG505 SOSIP trimer\210128_015.frd
16	Regeneration	KREGENERATION	5		16	H4	AHC (Anti-hIgG Fc Capture)		C:\Users\Labuser\Desktop\Overbaugh_lab\Mackenzie Shipley\QA013.2 Lineage\QA013.2_Lineage Replicates_BG505 SOSIP trimer\210128_016.frd
17	Regeneration	KREGENERATION	5
18	Regeneration	KREGENERATION	5
19	Baseline	BASELINE	30
20	Loading	LOADING	80
21	Baseline	BASELINE	30
22	Association	ASSOC	180
23	Dissociation	DISASSOC	180
24	Regeneration	KREGENERATION	5
25	Regeneration	KREGENERATION	5
26	Regeneration	KREGENERATION	5
27	Regeneration	KREGENERATION	5
28	Regeneration	KREGENERATION	5
29	Regeneration	KREGENERATION	5
30	Baseline	BASELINE	30
31	Loading	LOADING	80
32	Baseline	BASELINE	30
33	Association	ASSOC	180
34	Dissociation	DISASSOC	180
35	Regeneration	KREGENERATION	5
36	Regeneration	KREGENERATION	5
37	Regeneration	KREGENERATION	5
38	Regeneration	KREGENERATION	5
39	Regeneration	KREGENERATION	5
40	Regeneration	KREGENERATION	5
41	Baseline	BASELINE	30
42	Loading	LOADING	80
43	Baseline	BASELINE	30
44	Association	ASSOC	180
45	Dissociation	DISASSOC	180
46	Regeneration	KREGENERATION	5
47	Regeneration	KREGENERATION	5
48	Regeneration	KREGENERATION	5
49	Regeneration	KREGENERATION	5
50	Regeneration	KREGENERATION	5
51	Regeneration	KREGENERATION	5
52	Baseline	BASELINE	30
53	Loading	LOADING	80
54	Baseline	BASELINE	30
55	Association	ASSOC	180
56	Dissociation	DISASSOC	180
57	Regeneration	KREGENERATION	5
58	Regeneration	KREGENERATION	5
59	Regeneration	KREGENERATION	5
60	Regeneration	KREGENERATION	5
61	Regeneration	KREGENERATION	5
62	Regeneration	KREGENERATION	5
63	Baseline	BASELINE	30
64	Loading	LOADING	80
65	Baseline	BASELINE	30
66	Association	ASSOC	180
67	Dissociation	DISASSOC	180
68	Regeneration	KREGENERATION	5
69	Regeneration	KREGENERATION	5
70	Regeneration	KREGENERATION	5
71	Regeneration	KREGENERATION	5
72	Regeneration	KREGENERATION	5
73	Regeneration	KREGENERATION	5
74	Baseline	BASELINE	30
75	Loading	LOADING	80
76	Baseline	BASELINE	30
77	Association	ASSOC	180
78	Dissociation	DISASSOC	180
79	Regeneration	KREGENERATION	5
80	Regeneration	KREGENERATION	5
81	Regeneration	KREGENERATION	5
82	Regeneration	KREGENERATION	5
83	Regeneration	KREGENERATION	5
84	Regeneration	KREGENERATION	5
85	Baseline	BASELINE	30
86	Loading	LOADING	80
87	Baseline	BASELINE	30
88	Association	ASSOC	180
89	Dissociation	DISASSOC	180
90	Regeneration	KREGENERATION	5
91	Regeneration	KREGENERATION	5
92	Regeneration	KREGENERATION	5
93	Regeneration	KREGENERATION	5
94	Regeneration	KREGENERATION	5
95	Regeneration	KREGENERATION	5

## Sheet: Processing Parameters
Processing Parameters
Subtraction Type:	Double Reference
Align Y:	Yes
	Step to Align:	Association
	Time (seconds):	0	0
Inter-step Correction:	Dissociation
S-G Filtering	ON
Analysis Parameters
Step to Analyze	Association & Dissociation
Model:	1 to 1
Fitting	Global
	Group By:
		Color
	Rmax
		Unlinked by Sensor
Window of Interest:	Association (secs):	0	180
	Dissociation (secs):	0	180
Steady State Analysis
	Fit using Data	Req
Sensors Analyzed
	(A3-A4)-(H3-H4)
	(B3-B4)-(H3-H4)
	(C3-C4)-(H3-H4)
	(D3-D4)-(H3-H4)
	(E3-E4)-(H3-H4)
	(F3-F4)-(H3-H4)
	(G3-G4)-(H3-H4)

## Sheet: Sensor Data
Well Number	Well Location	Sensor	Sensor Type	Sensor Info	File Name
1	A1	Empty
2	B1	Empty
3	C1	Empty
4	D1	Empty
5	E1	Empty
6	F1	Empty
7	G1	Empty
8	H1	Empty
9	A2	Empty
10	B2	Empty
11	C2	Empty
12	D2	Empty
13	E2	Empty
14	F2	Empty
15	G2	Empty
16	H2	Empty
17	A3	Ligand Sensor	AHC (Anti-hIgG Fc Capture)		C:\Users\Labuser\Desktop\Overbaugh_lab\Mackenzie Shipley\QA013.2 Lineage\QA013.2_Lineage Replicates_BG505 SOSIP trimer\210128_001.frd
18	B3	Ligand Sensor	AHC (Anti-hIgG Fc Capture)		C:\Users\Labuser\Desktop\Overbaugh_lab\Mackenzie Shipley\QA013.2 Lineage\QA013.2_Lineage Replicates_BG505 SOSIP trimer\210128_002.frd
19	C3	Ligand Sensor	AHC (Anti-hIgG Fc Capture)		C:\Users\Labuser\Desktop\Overbaugh_lab\Mackenzie Shipley\QA013.2 Lineage\QA013.2_Lineage Replicates_BG505 SOSIP trimer\210128_003.frd
20	D3	Ligand Sensor	AHC (Anti-hIgG Fc Capture)		C:\Users\Labuser\Desktop\Overbaugh_lab\Mackenzie Shipley\QA013.2 Lineage\QA013.2_Lineage Replicates_BG505 SOSIP trimer\210128_004.frd
21	E3	Ligand Sensor	AHC (Anti-hIgG Fc Capture)		C:\Users\Labuser\Desktop\Overbaugh_lab\Mackenzie Shipley\QA013.2 Lineage\QA013.2_Lineage Replicates_BG505 SOSIP trimer\210128_005.frd
22	F3	Ligand Sensor	AHC (Anti-hIgG Fc Capture)		C:\Users\Labuser\Desktop\Overbaugh_lab\Mackenzie Shipley\QA013.2 Lineage\QA013.2_Lineage Replicates_BG505 SOSIP trimer\210128_006.frd
23	G3	Ligand Sensor	AHC (Anti-hIgG Fc Capture)		C:\Users\Labuser\Desktop\Overbaugh_lab\Mackenzie Shipley\QA013.2 Lineage\QA013.2_Lineage Replicates_BG505 SOSIP trimer\210128_007.frd
24	H3	Ligand Sensor	AHC (Anti-hIgG Fc Capture)		C:\Users\Labuser\Desktop\Overbaugh_lab\Mackenzie Shipley\QA013.2 Lineage\QA013.2_Lineage Replicates_BG505 SOSIP trimer\210128_008.frd
25	A4	Reference Sensor	AHC (Anti-hIgG Fc Capture)		C:\Users\Labuser\Desktop\Overbaugh_lab\Mackenzie Shipley\QA013.2 Lineage\QA013.2_Lineage Replicates_BG505 SOSIP trimer\210128_009.frd
26	B4	Reference Sensor	AHC (Anti-hIgG Fc Capture)		C:\Users\Labuser\Desktop\Overbaugh_lab\Mackenzie Shipley\QA013.2 Lineage\QA013.2_Lineage Replicates_BG505 SOSIP trimer\210128_010.frd
27	C4	Reference Sensor	AHC (Anti-hIgG Fc Capture)		C:\Users\Labuser\Desktop\Overbaugh_lab\Mackenzie Shipley\QA013.2 Lineage\QA013.2_Lineage Replicates_BG505 SOSIP trimer\210128_011.frd
28	D4	Reference Sensor	AHC (Anti-hIgG Fc Capture)		C:\Users\Labuser\Desktop\Overbaugh_lab\Mackenzie Shipley\QA013.2 Lineage\QA013.2_Lineage Replicates_BG505 SOSIP trimer\210128_012.frd
29	E4	Reference Sensor	AHC (Anti-hIgG Fc Capture)		C:\Users\Labuser\Desktop\Overbaugh_lab\Mackenzie Shipley\QA013.2 Lineage\QA013.2_Lineage Replicates_BG505 SOSIP trimer\210128_013.frd
30	F4	Reference Sensor	AHC (Anti-hIgG Fc Capture)		C:\Users\Labuser\Desktop\Overbaugh_lab\Mackenzie Shipley\QA013.2 Lineage\QA013.2_Lineage Replicates_BG505 SOSIP trimer\210128_014.frd
31	G4	Reference Sensor	AHC (Anti-hIgG Fc Capture)		C:\Users\Labuser\Desktop\Overbaugh_lab\Mackenzie Shipley\QA013.2 Lineage\QA013.2_Lineage Replicates_BG505 SOSIP trimer\210128_015.frd
32	H4	Reference Sensor	AHC (Anti-hIgG Fc Capture)		C:\Users\Labuser\Desktop\Overbaugh_lab\Mackenzie Shipley\QA013.2 Lineage\QA013.2_Lineage Replicates_BG505 SOSIP trimer\210128_016.frd
33	A5	Empty
34	B5	Empty
35	C5	Empty
36	D5	Empty
37	E5	Empty
38	F5	Empty
39	G5	Empty
40	H5	Empty
41	A6	Empty
42	B6	Empty
43	C6	Empty
44	D6	Empty
45	E6	Empty
46	F6	Empty
47	G6	Empty
48	H6	Empty
49	A7	Empty
50	B7	Empty
51	C7	Empty
52	D7	Empty
53	E7	Empty
54	F7	Empty
55	G7	Empty
56	H7	Empty
57	A8	Empty
58	B8	Empty
59	C8	Empty
60	D8	Empty
61	E8	Empty
62	F8	Empty
63	G8	Empty
64	H8	Empty
65	A9	Empty
66	B9	Empty
67	C9	Empty
68	D9	Empty
69	E9	Empty
70	F9	Empty
71	G9	Empty
72	H9	Empty
73	A10	Empty
74	B10	Empty
75	C10	Empty
76	D10	Empty
77	E10	Empty
78	F10	Empty
79	G10	Empty
80	H10	Empty
81	A11	Empty
82	B11	Empty
83	C11	Empty
84	D11	Empty
85	E11	Empty
86	F11	Empty
87	G11	Empty
88	H11	Empty
89	A12	Empty
90	B12	Empty
91	C12	Empty
92	D12	Empty
93	E12	Empty
94	F12	Empty
95	G12	Empty
96	H12	Empty

## Sheet: Sample Data
Well Number	Well Location	Well Type	Sample ID	Description	Molar Conc.
1	A1	Buffer			65535
2	B1	Buffer			65535
3	C1	Buffer			65535
4	D1	Buffer			65535
5	E1	Buffer			65535
6	F1	Buffer			65535
7	G1	Buffer			65535
8	H1	Reference Well			65535
9	A2	Load	BG505.23		65535
10	B2	Load	BG505.23		65535
11	C2	Load	BG505.23		65535
12	D2	Load	BG505.23		65535
13	E2	Load	BG505.23		65535
14	F2	Load	BG505.23		65535
15	G2	Load	BG505.23		65535
16	H2	Reference Well			65535
17	A3	Load	QA013 G0/Lmat		65535
18	B3	Load	QA013 deltaFWR		65535
19	C3	Load	QA013 G0/Lmat		65535
20	D3	Load	QA013 deltaFWR		65535
21	E3	Load	QA013 G0/Lmat		65535
22	F3	Load	QA013 deltaFWR		65535
23	G3	Load	QA013 G0/Lmat		65535
24	H3	Reference Well			65535
25	A4	Load	QA013 delta CDRH1		65535
26	B4	Load	QA013 delta CDRH1		65535
27	C4	Load	QA013 delta CDRH1		65535
28	D4	Load	QA013 delta CDRH1		65535
29	E4	Load	QA013 delta CDRH1		65535
30	F4	Load	QA013 delta CDRH1		65535
31	G4	Load	QA013 delta CDRH1		65535
32	H4	Reference Well			65535
33	A5	Load	QA013 delta CDRH3		65535
34	B5	Load	QA013 delta CDRH3		65535
35	C5	Load	QA013 delta CDRH3		65535
36	D5	Load	QA013 delta CDRH3		65535
37	E5	Load	QA013 delta CDRH3		65535
38	F5	Load	QA013 delta CDRH3		65535
39	G5	Load	QA013 delta CDRH3		65535
40	H5	Reference Well			65535
41	A6	Load	QA013 delta CDRL2		65535
42	B6	Load	QA013 delta CDRL2		65535
43	C6	Load	QA013 delta CDRL2		65535
44	D6	Load	QA013 delta CDRL2		65535
45	E6	Load	QA013 delta CDRL2		65535
46	F6	Load	QA013 delta CDRL2		65535
47	G6	Load	QA013 delta CDRL2		65535
48	H6	Reference Well			65535
49	A7	Load	QA013 delta CDRL3		65535
50	B7	Load	QA013 delta CDRL3		65535
51	C7	Load	QA013 delta CDRL3		65535
52	D7	Load	QA013 delta CDRL3		65535
53	E7	Load	QA013 delta CDRL3		65535
54	F7	Load	QA013 delta CDRL3		65535
55	G7	Load	QA013 delta CDRL3		65535
56	H7	Reference Well			65535
57	A8	Load	QA013 E32G		65535
58	B8	Load	QA013 E32G		65535
59	C8	Load	QA013 E32G		65535
60	D8	Load	QA013 E32G		65535
61	E8	Load	QA013 E32G		65535
62	F8	Load	QA013 E32G		65535
63	G8	Load	QA013 E32G		65535
64	H8	Reference Well			65535
65	A9	Load	QA013 D106V		65535
66	B9	Load	QA013 D106V		65535
67	C9	Load	QA013 D106V		65535
68	D9	Load	QA013 D106V		65535
69	E9	Load	QA013 D106V		65535
70	F9	Load	QA013 D106V		65535
71	G9	Load	QA013 D106V		65535
72	H9	Reference Well			65535
73	A10	Sample	BG505 T332N SOSIP		500
74	B10	Sample	BG505 T332N SOSIP		250
75	C10	Sample	BG505 T332N SOSIP		125
76	D10	Sample	BG505 T332N SOSIP		62.5
77	E10	Sample	BG505 T332N SOSIP		31.25
78	F10	Sample	BG505 T332N SOSIP		15.63
79	G10	Sample	BG505 T332N SOSIP		7.81
80	H10	Reference Well			65535
81	A11	Regeneration			65535
82	B11	Regeneration			65535
83	C11	Regeneration			65535
84	D11	Regeneration			65535
85	E11	Regeneration			65535
86	F11	Regeneration			65535
87	G11	Regeneration			65535
88	H11	Reference Well			65535
89	A12	Neutralization			65535
90	B12	Neutralization			65535
91	C12	Neutralization			65535
92	D12	Neutralization			65535
93	E12	Neutralization			65535
94	F12	Neutralization			65535
95	G12	Neutralization			65535
96	H12	Reference Well			65535

## Sheet: Raw and Aligned Data
Sensor Location	Color	Sensor	Sensor Type	Sensor Info
A3		Ligand Sensor	AHC (Anti-hIgG Fc Capture)
B3		Ligand Sensor	AHC (Anti-hIgG Fc Capture)
C3		Ligand Sensor	AHC (Anti-hIgG Fc Capture)
D3		Ligand Sensor	AHC (Anti-hIgG Fc Capture)
E3		Ligand Sensor	AHC (Anti-hIgG Fc Capture)
F3		Ligand Sensor	AHC (Anti-hIgG Fc Capture)
G3		Ligand Sensor	AHC (Anti-hIgG Fc Capture)
H3		Ligand Sensor	AHC (Anti-hIgG Fc Capture)
A4		Ligand Sensor	AHC (Anti-hIgG Fc Capture)
B4		Ligand Sensor	AHC (Anti-hIgG Fc Capture)
C4		Ligand Sensor	AHC (Anti-hIgG Fc Capture)
D4		Ligand Sensor	AHC (Anti-hIgG Fc Capture)
E4		Ligand Sensor	AHC (Anti-hIgG Fc Capture)
F4		Ligand Sensor	AHC (Anti-hIgG Fc Capture)
G4		Ligand Sensor	AHC (Anti-hIgG Fc Capture)
H4		Ligand Sensor	AHC (Anti-hIgG Fc Capture)

## Sheet: Result Table
Selected	Include	Index	Color	Sensor Location	Sensor Type	Sensor Info	Replicate Group	Baseline Loc.	Assoc. (Sample) Loc.	Sample ID	Dissoc. Loc.	Loading Well Location	Loading Sample ID	Cycle	Conc. (nM)	Response	KD (M)	KD Error	kon(1/Ms)	kon Error	kdis(1/s)	kdis Error	RMax	RMax Error	kobs(1/s)	Req	Req/Rmax(%)	Full X^2	Full R^2	SSG KD	SSG Rmax	SSG R^2
	x	1	-6908266	A3	AHC (Anti-hIgG Fc Capture)		N/A	A1	A10	BG505 T332N SOSIP	A1	A3	QA013 G0/Lmat	2	500	0.0329	3.847e-09	9.646e-10	1272000	312300	0.004892	0.0002474	0.031	0.0004	0.6407	0.0308	99.2	0.0285	0.8371	98000000	5.98003e+12	0.99
	x	17	-6908266	C3	AHC (Anti-hIgG Fc Capture)		N/A	C1	C10	BG505 T332N SOSIP	C1	C3	QA013 G0/Lmat	2	125	0.0079	3.847e-09	9.646e-10	1272000	312300	0.004892	0.0002474	0.0061	0.0003	0.1638	0.0059	97	0.0285	0.8371	98000000	5.98003e+12	0.99
	x	33	-6908266	E3	AHC (Anti-hIgG Fc Capture)		N/A	E1	E10	BG505 T332N SOSIP	E1	E3	QA013 G0/Lmat	2	31.3	0.0078	3.847e-09	9.646e-10	1272000	312300	0.004892	0.0002474	0.0036	0.0004	0.04463	0.0032	89	0.0285	0.8371	98000000	5.98003e+12	0.99
		49	-6908266	G3	AHC (Anti-hIgG Fc Capture)		N/A	G1	G10	BG505 T332N SOSIP	G1	G3	QA013 G0/Lmat	2	7.81	0.0137
		45	-5143054	F3	AHC (Anti-hIgG Fc Capture)		N/A	F1	F10	BG505 T332N SOSIP	F1	F7	QA013 delta CDRL3	6	15.6	-0.0034
		37	-5143054	E3	AHC (Anti-hIgG Fc Capture)		N/A	E1	E10	BG505 T332N SOSIP	E1	E7	QA013 delta CDRL3	6	31.3	0.0024
	x	13	-5143054	B3	AHC (Anti-hIgG Fc Capture)		N/A	B1	B10	BG505 T332N SOSIP	B1	B7	QA013 delta CDRL3	6	250	0.0705	1.122e-07	2.284e-08	2190	356.3	0.0002457	3.011e-05	0.8368	0.1323	0.0007933	0.5777	69	0.0197	0.9912	1.3e-07	0.7907	0.8643
	x	29	-5143054	D3	AHC (Anti-hIgG Fc Capture)		N/A	D1	D10	BG505 T332N SOSIP	D1	D7	QA013 delta CDRL3	6	62.5	0.01	1.122e-07	2.284e-08	2190	356.3	0.0002457	3.011e-05	0.4691	0.0774	0.0003826	0.1679	35.8	0.0197	0.9912	1.3e-07	0.7907	0.8643
	x	21	-5143054	C3	AHC (Anti-hIgG Fc Capture)		N/A	C1	C10	BG505 T332N SOSIP	C1	C7	QA013 delta CDRL3	6	125	0.0317	1.122e-07	2.284e-08	2190	356.3	0.0002457	3.011e-05	0.8085	0.1309	0.0005195	0.4262	52.7	0.0197	0.9912	1.3e-07	0.7907	0.8643
	x	5	-5143054	A3	AHC (Anti-hIgG Fc Capture)		N/A	A1	A10	BG505 T332N SOSIP	A1	A7	QA013 delta CDRL3	6	500	0.1056	1.122e-07	2.284e-08	2190	356.3	0.0002457	3.011e-05	0.7056	0.1066	0.001341	0.5763	81.7	0.0197	0.9912	1.3e-07	0.7907	0.8643
		53	-5143054	G3	AHC (Anti-hIgG Fc Capture)		N/A	G1	G10	BG505 T332N SOSIP	G1	G7	QA013 delta CDRL3	6	7.81	0.0046
	x	22	-39091	C3	AHC (Anti-hIgG Fc Capture)		N/A	C1	C10	BG505 T332N SOSIP	C1	C8	QA013 E32G	7	125	0.0155	1.233e-07	2.202e-08	4081	598.5	0.0005032	5.13e-05	0.1689	0.0247	0.001013	0.085	50.3	0.0198	0.9795	4.4e-07	0.4197	0.8115
	x	6	-39091	A3	AHC (Anti-hIgG Fc Capture)		N/A	A1	A10	BG505 T332N SOSIP	A1	A8	QA013 E32G	7	500	0.0674	1.233e-07	2.202e-08	4081	598.5	0.0005032	5.13e-05	0.2548	0.0326	0.002544	0.2044	80.2	0.0198	0.9795	4.4e-07	0.4197	0.8115
		54	-39091	G3	AHC (Anti-hIgG Fc Capture)		N/A	G1	G10	BG505 T332N SOSIP	G1	G8	QA013 E32G	7	7.81	0.0109
	x	14	-39091	B3	AHC (Anti-hIgG Fc Capture)		N/A	B1	B10	BG505 T332N SOSIP	B1	B8	QA013 E32G	7	250	0.0471	1.233e-07	2.202e-08	4081	598.5	0.0005032	5.13e-05	0.3028	0.0422	0.001523	0.2028	67	0.0198	0.9795	4.4e-07	0.4197	0.8115
		46	-39091	F3	AHC (Anti-hIgG Fc Capture)		N/A	F1	F10	BG505 T332N SOSIP	F1	F8	QA013 E32G	7	15.6	0.0015
		38	-39091	E3	AHC (Anti-hIgG Fc Capture)		N/A	E1	E10	BG505 T332N SOSIP	E1	E8	QA013 E32G	7	31.3	0.014
	x	30	-39091	D3	AHC (Anti-hIgG Fc Capture)		N/A	D1	D10	BG505 T332N SOSIP	D1	D8	QA013 E32G	7	62.5	0.0002	1.233e-07	2.202e-08	4081	598.5	0.0005032	5.13e-05	0.0074	0.0058	0.0007582	0.0025	33.6	0.0198	0.9795	4.4e-07	0.4197	0.8115
	x	31	-3721216	D3	AHC (Anti-hIgG Fc Capture)		N/A	D1	D10	BG505 T332N SOSIP	D1	D9	QA013 D106V	8	62.5	0.0389	1.164e-08	1.211e-09	15810	269.5	0.000184	1.889e-05	0.268	0.005	0.001172	0.2259	84.3	0.0373	0.9957	2.4e-08	0.3105	0.9334
	x	23	-3721216	C3	AHC (Anti-hIgG Fc Capture)		N/A	C1	C10	BG505 T332N SOSIP	C1	C9	QA013 D106V	8	125	0.0759	1.164e-08	1.211e-09	15810	269.5	0.000184	1.889e-05	0.2824	0.0047	0.00216	0.2583	91.5	0.0373	0.9957	2.4e-08	0.3105	0.9334
	x	39	-3721216	E3	AHC (Anti-hIgG Fc Capture)		N/A	E1	E10	BG505 T332N SOSIP	E1	E9	QA013 D106V	8	31.3	0.0227	1.164e-08	1.211e-09	15810	269.5	0.000184	1.889e-05	0.2386	0.0056	0.000678	0.1738	72.9	0.0373	0.9957	2.4e-08	0.3105	0.9334
		55	-3721216	G3	AHC (Anti-hIgG Fc Capture)		N/A	G1	G10	BG505 T332N SOSIP	G1	G9	QA013 D106V	8	7.81	0.0011
	x	15	-3721216	B3	AHC (Anti-hIgG Fc Capture)		N/A	B1	B10	BG505 T332N SOSIP	B1	B9	QA013 D106V	8	250	0.1537	1.164e-08	1.211e-09	15810	269.5	0.000184	1.889e-05	0.3182	0.0044	0.004136	0.3041	95.6	0.0373	0.9957	2.4e-08	0.3105	0.9334
		47	-3721216	F3	AHC (Anti-hIgG Fc Capture)		N/A	F1	F10	BG505 T332N SOSIP	F1	F9	QA013 D106V	8	15.6	-0.0024
	x	7	-3721216	A3	AHC (Anti-hIgG Fc Capture)		N/A	A1	A10	BG505 T332N SOSIP	A1	A9	QA013 D106V	8	500	0.2077	1.164e-08	1.211e-09	15810	269.5	0.000184	1.889e-05	0.2871	0.0029	0.008088	0.2806	97.7	0.0373	0.9957	2.4e-08	0.3105	0.9334
		44	-24008	F3	AHC (Anti-hIgG Fc Capture)		N/A	F1	F10	BG505 T332N SOSIP	F1	F6	QA013 delta CDRL2	5	15.6	-0.0079
	x	12	-24008	B3	AHC (Anti-hIgG Fc Capture)		N/A	B1	B10	BG505 T332N SOSIP	B1	B6	QA013 delta CDRL2	5	250	0.0413	1.293e-06	3.895e-06	250.9	753.9	0.0003244	6.765e-05	3.8529	11.541	0.0003872	0.6241	16.2	0.0225	0.971	5.3e-06	11.1408	0.8952
		28	-24008	D3	AHC (Anti-hIgG Fc Capture)		N/A	D1	D10	BG505 T332N SOSIP	D1	D6	QA013 delta CDRL2	5	62.5	0.0056
	x	4	-24008	A3	AHC (Anti-hIgG Fc Capture)		N/A	A1	A10	BG505 T332N SOSIP	A1	A6	QA013 delta CDRL2	5	500	0.0681	1.293e-06	3.895e-06	250.9	753.9	0.0003244	6.765e-05	3.3901	10.102	0.0004499	0.9452	27.9	0.0225	0.971	5.3e-06	11.1408	0.8952
		52	-24008	G3	AHC (Anti-hIgG Fc Capture)		N/A	G1	G10	BG505 T332N SOSIP	G1	G6	QA013 delta CDRL2	5	7.81	0.0092
	x	20	-24008	C3	AHC (Anti-hIgG Fc Capture)		N/A	C1	C10	BG505 T332N SOSIP	C1	C6	QA013 delta CDRL2	5	125	0.0072	1.293e-06	3.895e-06	250.9	753.9	0.0003244	6.765e-05	1.2173	3.6561	0.0003558	0.1073	8.8	0.0225	0.971	5.3e-06	11.1408	0.8952
		36	-24008	E3	AHC (Anti-hIgG Fc Capture)		N/A	E1	E10	BG505 T332N SOSIP	E1	E6	QA013 delta CDRL2	5	31.3	0.0097
x		41	-14513767	F3	AHC (Anti-hIgG Fc Capture)		N/A	F1	F10	BG505 T332N SOSIP	F1	F3	QA013 deltaFWR	2	15.6	-0.0015
	x	25	-14513767	D3	AHC (Anti-hIgG Fc Capture)		N/A	D1	D10	BG505 T332N SOSIP	D1	D3	QA013 deltaFWR	2	62.5	0.0094	8.865e-09	2.513e-09	2096000	582500	0.01858	0.00104	0.0088	0.0005	0.1496	0.0077	87.6	0.0172	0.8081	6e-07	0.0821	1
	x	9	-14513767	B3	AHC (Anti-hIgG Fc Capture)		N/A	B1	B10	BG505 T332N SOSIP	B1	B3	QA013 deltaFWR	2	250	0.0243	8.865e-09	2.513e-09	2096000	582500	0.01858	0.00104	0.0249	0.0005	0.5425	0.024	96.6	0.0172	0.8081	6e-07	0.0821	1
		40	-14261055	F3	AHC (Anti-hIgG Fc Capture)		N/A	F1	F10	BG505 T332N SOSIP	F1	F2	BG505.23	1	15.6	-0.0142
		48	-14261055	G3	AHC (Anti-hIgG Fc Capture)		N/A	G1	G10	BG505 T332N SOSIP	G1	G2	BG505.23	1	7.81	0.0097
	x	0	-14261055	A3	AHC (Anti-hIgG Fc Capture)		N/A	A1	A10	BG505 T332N SOSIP	A1	A2	BG505.23	1	500	0.0634	1.186e-05	0.0001253	151.5	1601	0.001796	0.0001631	5.6791	59.736	0.001872	0.2298	4	0.0951	0.8831	1e-09	0	0
	x	16	-14261055	C3	AHC (Anti-hIgG Fc Capture)		N/A	C1	C10	BG505 T332N SOSIP	C1	C2	BG505.23	1	125	0.0102	1.186e-05	0.0001253	151.5	1601	0.001796	0.0001631	0.8691	9.1841	0.001815	0.0091	1	0.0951	0.8831	1e-09	0	0
		32	-14261055	E3	AHC (Anti-hIgG Fc Capture)		N/A	E1	E10	BG505 T332N SOSIP	E1	E2	BG505.23	1	31.3	-0.0092
	x	24	-14261055	D3	AHC (Anti-hIgG Fc Capture)		N/A	D1	D10	BG505 T332N SOSIP	D1	D2	BG505.23	1	62.5	-0.0009	1.186e-05	0.0001253	151.5	1601	0.001796	0.0001631	0		0.001806	0	0.5	0.0951	0.8831	1e-09	0	0
	x	8	-14261055	B3	AHC (Anti-hIgG Fc Capture)		N/A	B1	B10	BG505 T332N SOSIP	B1	B2	BG505.23	1	250	0.0341	1.186e-05	0.0001253	151.5	1601	0.001796	0.0001631	4.6864	49.4404	0.001834	0.0968	2.1	0.0951	0.8831	1e-09	0	0
	x	3	-12859347	A3	AHC (Anti-hIgG Fc Capture)		N/A	A1	A10	BG505 T332N SOSIP	A1	A5	QA013 delta CDRH3	4	500	0.1647	1.558e-08	1.369e-09	16260	302.3	0.0002532	2.175e-05	0.2288	0.0025	0.008381	0.2219	97	0.0229	0.9946	6.2e-08	0.2591	0.9561
		51	-12859347	G3	AHC (Anti-hIgG Fc Capture)		N/A	G1	G10	BG505 T332N SOSIP	G1	G5	QA013 delta CDRH3	4	7.81	0.0081
	x	11	-12859347	B3	AHC (Anti-hIgG Fc Capture)		N/A	B1	B10	BG505 T332N SOSIP	B1	B5	QA013 delta CDRH3	4	250	0.1133	1.558e-08	1.369e-09	16260	302.3	0.0002532	2.175e-05	0.2351	0.0036	0.004317	0.2213	94.1	0.0229	0.9946	6.2e-08	0.2591	0.9561
		35	-12859347	E3	AHC (Anti-hIgG Fc Capture)		N/A	E1	E10	BG505 T332N SOSIP	E1	E5	QA013 delta CDRH3	4	31.3	0.0198
	x	27	-12859347	D3	AHC (Anti-hIgG Fc Capture)		N/A	D1	D10	BG505 T332N SOSIP	D1	D5	QA013 delta CDRH3	4	62.5	0.0281	1.558e-08	1.369e-09	16260	302.3	0.0002532	2.175e-05	0.1587	0.0034	0.001269	0.127	80	0.0229	0.9946	6.2e-08	0.2591	0.9561
	x	19	-12859347	C3	AHC (Anti-hIgG Fc Capture)		N/A	C1	C10	BG505 T332N SOSIP	C1	C5	QA013 delta CDRH3	4	125	0.0554	1.558e-08	1.369e-09	16260	302.3	0.0002532	2.175e-05	0.1924	0.0035	0.002285	0.1711	88.9	0.0229	0.9946	6.2e-08	0.2591	0.9561
		43	-12859347	F3	AHC (Anti-hIgG Fc Capture)		N/A	F1	F10	BG505 T332N SOSIP	F1	F5	QA013 delta CDRH3	4	15.6	0.0011
	x	10	-12144190	B3	AHC (Anti-hIgG Fc Capture)		N/A	B1	B10	BG505 T332N SOSIP	B1	B4	QA013 delta CDRH1	3	250	0.1018	3.983e-08	1.629e-09	16400	322.6	0.0006532	2.342e-05	0.2089	0.0034	0.004754	0.1802	86.3	0.0198	0.9934	6.8e-08	0.2211	0.9875
		50	-12144190	G3	AHC (Anti-hIgG Fc Capture)		N/A	G1	G10	BG505 T332N SOSIP	G1	G4	QA013 delta CDRH1	3	7.81	0.02
		42	-12144190	F3	AHC (Anti-hIgG Fc Capture)		N/A	F1	F10	BG505 T332N SOSIP	F1	F4	QA013 delta CDRH1	3	15.6	0.0065
	x	26	-12144190	D3	AHC (Anti-hIgG Fc Capture)		N/A	D1	D10	BG505 T332N SOSIP	D1	D4	QA013 delta CDRH1	3	62.5	0.0294	3.983e-08	1.629e-09	16400	322.6	0.0006532	2.342e-05	0.171	0.0038	0.001678	0.1044	61.1	0.0198	0.9934	6.8e-08	0.2211	0.9875
	x	2	-12144190	A3	AHC (Anti-hIgG Fc Capture)		N/A	A1	A10	BG505 T332N SOSIP	A1	A4	QA013 delta CDRH1	3	500	0.147	3.983e-08	1.629e-09	16400	322.6	0.0006532	2.342e-05	0.206	0.0024	0.008854	0.1908	92.6	0.0198	0.9934	6.8e-08	0.2211	0.9875
	x	18	-12144190	C3	AHC (Anti-hIgG Fc Capture)		N/A	C1	C10	BG505 T332N SOSIP	C1	C4	QA013 delta CDRH1	3	125	0.052	3.983e-08	1.629e-09	16400	322.6	0.0006532	2.342e-05	0.1882	0.0036	0.002703	0.1427	75.8	0.0198	0.9934	6.8e-08	0.2211	0.9875
		34	-12144190	E3	AHC (Anti-hIgG Fc Capture)		N/A	E1	E10	BG505 T332N SOSIP	E1	E4	QA013 delta CDRH1	3	31.3	0.0288

## Sheet: Analysis Parameters
2;0:Association; 1: Dissociation; 2: both
1;1: 1:1 model; 2: 2:1; 3: Mass Transport
1;0:local; 1:global
0;0:Full; 1: partial
1;0:Sensor; 1: color; 2:...
0;
1;0:linked; 1: unlinked by sensor; 2: unlinked by compound; 3: ...
1;0: use entire step, 1:use WOI
0;secs, Assoication starts
180;Association step ends
0;Dissociation step starts
179.999011230469;Dissociation step ends
0;0: use Req; 1:Response;
