# Supplementary material for: Functional development of a V3/glycan-specific broadly neutralizing antibody isolated from a case of HIV superinfection
Source: eLife journal article supplement (doi:10.7554/elife.68110), 2021-07-15
Supplement: fig4-data2 [file F3.xls]

Vers 3.43 Data Simulation
Conc1	1.563E-08	1.563E-08	1.563E-08	1.563E-08	1.563E-08	1.563E-08	1.563E-08	1.563E-08
Start1	200	729.99	1259.99	1789.99	2319.98	2849.98	3379.97	3909.97
Stop1	559.8	1089.79	1619.79	2149.78	2679.78	3209.77	3739.77	4269.77
Time1	Data1	Sim1	Time2	Data2	Sim2	Time3	Data3	Sim3	Time4	Data4	Sim4	Time5	Data5	Sim5	Time6	Data6	Sim6	Time7	Data7	Sim7	Time8	Data8	Sim8
200	-0.0093881		729.99	-0.00223078		1259.99	-0.00103373		1789.99	-0.00273882		2319.98	-0.00864635		2849.98	-0.00800264		3379.97	0.00027891		3909.97	-0.00768193
200.2	-0.00886949		730.19	-0.00157334		1260.19	-0.00273364		1790.19	-0.00301876		2320.18	-0.00842425		2850.18	-0.00835332		3380.17	0.00143536		3910.17	-0.00826324
200.4	-0.00846732		730.39	-0.00041731		1260.39	-0.00361614		1790.39	-0.00261545		2320.38	-0.00852779		2850.38	-0.00829288		3380.37	0.00222984		3910.37	-0.00859318
200.6	-0.0081057		730.59	0.00045065		1260.59	-0.0044026		1790.59	-0.00354843		2320.58	-0.0085551		2850.58	-0.00800637		3380.57	0.00304209		3910.57	-0.00849405
200.8	-0.00706979		730.79	0.00196005		1260.79	-0.00495134		1790.79	-0.00344158		2320.78	-0.00871545		2850.78	-0.00862203		3380.77	0.00432625		3910.77	-0.00926727
201	-0.00645983		730.99	0.00288483		1260.99	-0.00558628		1790.99	-0.00382963		2320.98	-0.00899407		2850.98	-0.00838701		3380.97	0.00485761		3910.97	-0.00975223
201.2	-0.0063433		731.19	0.00336928		1261.19	-0.0060407		1791.19	-0.00379483		2321.18	-0.00869435		2851.18	-0.00771519		3381.17	0.00529075		3911.17	-0.01064008
201.4	-0.00611241		731.39	0.00354162		1261.39	-0.00627317		1791.39	-0.00364511		2321.38	-0.00903399		2851.38	-0.00777089		3381.37	0.00520845		3911.37	-0.01027647
201.6	-0.00616114		731.59	0.00399884		1261.59	-0.00524266		1791.59	-0.00316277		2321.58	-0.00990739		2851.58	-0.00726917		3381.57	0.00536268		3911.57	-0.01026934
201.8	-0.00614516		731.79	0.00449837		1261.79	-0.00494952		1791.79	-0.00296585		2321.78	-0.01081056		2851.78	-0.00588891		3381.77	0.00475312		3911.77	-0.01045733
202	-0.00669415		731.99	0.00397337		1261.99	-0.00426811		1791.99	-0.003646		2321.98	-0.01169834		2851.98	-0.00455899		3381.97	0.00448755		3911.97	-0.01076008
202.2	-0.00672225		732.19	0.00347455		1262.19	-0.00364518		1792.19	-0.00409268		2322.18	-0.01139539		2852.18	-0.00316926		3382.17	0.00298922		3912.17	-0.01071284
202.4	-0.00709437		732.39	0.00317146		1262.39	-0.00391978		1792.39	-0.00465057		2322.38	-0.01253985		2852.38	-0.00193776		3382.37	0.00251153		3912.37	-0.01173852
202.6	-0.00640529		732.59	0.00255924		1262.59	-0.00418019		1792.59	-0.00425385		2322.58	-0.01300169		2852.58	-0.00235572		3382.57	0.00221952		3912.57	-0.012798
202.8	-0.00779765		732.79	0.00100527		1262.79	-0.00427997		1792.79	-0.00457038		2322.78	-0.01251393		2852.78	-0.00203519		3382.77	0.0013926		3912.77	-0.0128849
203	-0.00795794		732.99	-0.00007596		1262.99	-0.00362921		1792.99	-0.00496504		2322.98	-0.01129778		2852.98	-0.0013516		3382.97	0.00122856		3912.97	-0.01244417
203.2	-0.00822529		733.19	-0.00083467		1263.19	-0.00352945		1793.19	-0.00467237		2323.18	-0.01139236		2853.18	-0.00093744		3383.17	0.00152589		3913.17	-0.01202489
203.4	-0.00846263		733.39	-0.00060546		1263.39	-0.00385537		1793.39	-0.0040893		2323.38	-0.01081559		2853.38	-0.00165973		3383.37	0.00167724		3913.37	-0.01162443
203.6	-0.00907097		733.59	-0.0007431		1263.59	-0.00449396		1793.59	-0.00454315		2323.58	-0.0098504		2853.58	-0.00334909		3383.57	0.00235872		3913.57	-0.01076019
203.8	-0.00960269		733.79	-0.00109608		1263.79	-0.00569962		1793.79	-0.00415943		2323.78	-0.0099734		2853.78	-0.00432583		3383.77	0.00308884		3913.77	-0.01068084
204	-0.00961929		733.99	-0.00068159		1263.99	-0.00608386		1793.99	-0.00336848		2323.98	-0.00970703		2853.98	-0.00486651		3383.97	0.00354917		3913.97	-0.01105163
204.2	-0.01058246		734.19	-0.00097819		1264.19	-0.00598774		1794.19	-0.00295198		2324.18	-0.01041013		2854.18	-0.00602621		3384.17	0.00375702		3914.17	-0.01081227
204.4	-0.0102479		734.39	-0.0008015		1264.39	-0.00517502		1794.39	-0.00254332		2324.38	-0.01022852		2854.38	-0.00641334		3384.37	0.00357945		3914.37	-0.01012639
204.6	-0.00964464		734.59	-0.00093445		1264.59	-0.00497009		1794.59	-0.00360386		2324.58	-0.01005249		2854.58	-0.00685253		3384.57	0.00374176		3914.57	-0.00971599
204.8	-0.00925822		734.79	-0.00050011		1264.79	-0.00475432		1794.79	-0.0028737		2324.78	-0.00986124		2854.78	-0.00834419		3384.77	0.00404275		3914.77	-0.01057481
205	-0.00969199		734.99	-0.00149493		1264.99	-0.00493115		1794.99	-0.00293793		2324.98	-0.01081645		2854.98	-0.00834249		3384.97	0.00395148		3914.97	-0.01004351
205.2	-0.00984515		735.19	-0.00127531		1265.19	-0.00471771		1795.19	-0.00318325		2325.18	-0.01085198		2855.18	-0.00854345		3385.17	0.00379438		3915.17	-0.00958269
205.4	-0.01005291		735.39	-0.00071834		1265.39	-0.00415273		1795.39	-0.00346944		2325.38	-0.01245239		2855.38	-0.00879377		3385.37	0.00309328		3915.37	-0.00870975
205.6	-0.01019398		735.59	-0.0004007		1265.59	-0.00352092		1795.59	-0.00328931		2325.58	-0.01343637		2855.58	-0.00827062		3385.57	0.00268989		3915.57	-0.00843839
205.8	-0.0098848		735.79	-0.00073317		1265.79	-0.00423053		1795.79	-0.00440635		2325.78	-0.0138111		2855.78	-0.00750118		3385.77	0.00155408		3915.77	-0.00859263
206	-0.00957717		735.99	-0.00147075		1265.99	-0.00369796		1795.99	-0.00495078		2325.98	-0.01388929		2855.98	-0.00733691		3385.97	0.00030017		3915.97	-0.00880727
206.2	-0.00847003		736.19	-0.00133701		1266.19	-0.0038988		1796.19	-0.00542681		2326.18	-0.01366558		2856.18	-0.00662003		3386.17	-0.00061967		3916.17	-0.00909077
206.4	-0.00795661		736.39	-0.00095631		1266.39	-0.00274139		1796.39	-0.00590041		2326.38	-0.01387078		2856.38	-0.00623336		3386.37	-0.00114333		3916.37	-0.00924651
206.6	-0.00798359		736.59	-0.00219859		1266.59	-0.00258622		1796.59	-0.00637074		2326.58	-0.01339637		2856.58	-0.00637597		3386.57	-0.00108505		3916.57	-0.00939926
206.8	-0.00822622		736.79	-0.00232827		1266.79	-0.00241048		1796.79	-0.00636999		2326.78	-0.01308245		2856.78	-0.00587329		3386.77	-0.00148824		3916.77	-0.00831366
207	-0.00713789		736.99	-0.00247233		1266.99	-0.00250487		1796.99	-0.00681287		2326.98	-0.01277971		2856.98	-0.00528098		3386.97	-0.00045602		3916.97	-0.00802716
207.2	-0.00693856		737.19	-0.00206323		1267.19	-0.00220049		1797.19	-0.00755034		2327.18	-0.01268775		2857.18	-0.00496374		3387.17	-0.00041551		3917.17	-0.00703933
207.4	-0.00687248		737.39	-0.00185481		1267.39	-0.00155901		1797.39	-0.00770103		2327.38	-0.01343329		2857.38	-0.00538394		3387.37	-0.00020174		3917.37	-0.00659336
207.6	-0.00677573		737.59	-0.00249728		1267.59	-0.00180458		1797.59	-0.00718776		2327.58	-0.01449186		2857.58	-0.00624276		3387.57	0.00004108		3917.57	-0.00572689
207.8	-0.00755744		737.79	-0.00301982		1267.79	-0.00172107		1797.79	-0.00683648		2327.78	-0.01582721		2857.78	-0.00668545		3387.77	0.00032972		3917.77	-0.00646998
208	-0.00772823		737.99	-0.00219813		1267.99	-0.00195265		1797.99	-0.00597285		2327.98	-0.01651794		2857.98	-0.00662242		3387.97	-0.0002405		3917.97	-0.00657154
208.2	-0.00767217		738.19	-0.00205114		1268.19	-0.00175355		1798.19	-0.0063718		2328.18	-0.01654121		2858.18	-0.00728609		3388.17	-0.0002347		3918.17	-0.00652557
208.4	-0.00694325		738.39	-0.00163496		1268.39	-0.00221715		1798.39	-0.00655618		2328.38	-0.01656126		2858.38	-0.0069694		3388.37	-0.0010306		3918.37	-0.00681628
208.6	-0.00682263		738.59	-0.00166347		1268.59	-0.00208244		1798.59	-0.0064881		2328.58	-0.01678299		2858.58	-0.00621774		3388.57	-0.00079788		3918.57	-0.00770698
208.8	-0.00690483		738.79	-0.00182615		1268.79	-0.00304877		1798.79	-0.00621825		2328.78	-0.017372		2858.78	-0.00662074		3388.77	-0.00059864		3918.77	-0.00871556
209	-0.00742351		738.99	-0.00169631		1268.99	-0.00375223		1798.99	-0.0065988		2328.98	-0.01813803		2858.98	-0.00605842		3388.97	-0.0005141		3918.97	-0.0092382
209.2	-0.00757012		739.19	-0.00048276		1269.19	-0.00477341		1799.19	-0.00603026		2329.18	-0.01767424		2859.18	-0.00574327		3389.17	-0.0006486		3919.17	-0.00908475
209.4	-0.00854651		739.39	-0.0000753		1269.39	-0.00513303		1799.39	-0.00442129		2329.38	-0.01773172		2859.38	-0.00473857		3389.37	-0.00146139		3919.37	-0.01010682
209.6	-0.00833212		739.59	-0.00041666		1269.59	-0.00602812		1799.59	-0.00336391		2329.58	-0.01667125		2859.58	-0.00475238		3389.57	-0.00175656		3919.57	-0.01062875
209.8	-0.00830038		739.79	-0.0002992		1269.79	-0.00635067		1799.79	-0.002804		2329.78	-0.01602988		2859.78	-0.00507523		3389.77	-0.00257837		3919.77	-0.01096052
210	-0.00787671		739.99	-0.00017657		1269.99	-0.00651463		1799.99	-0.00165567		2329.98	-0.01566617		2859.98	-0.00521092		3389.97	-0.00306788		3919.97	-0.01063564
210.2	-0.00765758		740.19	0.00050429		1270.19	-0.00714875		1800.19	-0.00189305		2330.18	-0.01549744		2860.18	-0.00516253		3390.17	-0.00242511		3920.17	-0.01039485
210.4	-0.00847188		740.39	0.00161108		1270.39	-0.00685105		1800.39	-0.00199376		2330.38	-0.01419673		2860.38	-0.00521107		3390.37	-0.002762		3920.37	-0.0098803
210.6	-0.00827021		740.59	0.00118365		1270.59	-0.00644701		1800.59	-0.00202321		2330.58	-0.01293158		2860.58	-0.00481745		3390.57	-0.00166816		3920.57	-0.01033691
210.8	-0.00825989		740.79	0.00197268		1270.79	-0.00619018		1800.79	-0.00175481		2330.78	-0.01310102		2860.78	-0.00477232		3390.77	-0.00120432		3920.77	-0.00912284
211	-0.0079826		740.99	0.00192921		1270.99	-0.00606887		1800.99	-0.00192226		2330.98	-0.01292249		2860.98	-0.00432503		3390.97	-0.00057607		3920.97	-0.00827765
211.2	-0.00864943		741.19	0.00191727		1271.19	-0.00580979		1801.19	-0.00233617		2331.18	-0.01305524		2861.18	-0.00480895		3391.17	-0.00036401		3921.17	-0.00721497
211.4	-0.00871755		741.39	0.00123413		1271.39	-0.00475198		1801.39	-0.00147717		2331.38	-0.01356792		2861.38	-0.00483258		3391.37	-0.0006802		3921.37	-0.00782639
211.6	-0.00926925		741.59	0.00092826		1271.59	-0.00477802		1801.59	-0.00176607		2331.58	-0.0140092		2861.58	-0.0051708		3391.57	-0.00101247		3921.57	-0.00745663
211.8	-0.01024261		741.79	0.00052688		1271.79	-0.00439901		1801.79	-0.00318012		2331.78	-0.01395348		2861.78	-0.00528171		3391.77	-0.00019327		3921.77	-0.00776815
212	-0.01009461		741.99	0.00130668		1271.99	-0.00530064		1801.99	-0.00423977		2331.98	-0.01454477		2861.98	-0.00527617		3391.97	-0.00047258		3921.97	-0.00765832
212.2	-0.01035373		742.19	0.0008759		1272.19	-0.00465759		1802.19	-0.00574704		2332.18	-0.01409739		2862.18	-0.00526124		3392.17	0.00019843		3922.17	-0.00820625
212.4	-0.01024635		742.39	0.00016353		1272.39	-0.00518081		1802.39	-0.00621123		2332.38	-0.0147162		2862.38	-0.00443463		3392.37	-0.00011712		3922.37	-0.00881335
212.6	-0.00963597		742.59	-0.00106311		1272.59	-0.00534832		1802.59	-0.00679471		2332.58	-0.01461199		2862.58	-0.00469971		3392.57	0.00043135		3922.57	-0.00947976
212.8	-0.01010282		742.79	-0.00129148		1272.79	-0.00620941		1802.79	-0.00781721		2332.78	-0.01531265		2862.78	-0.00499565		3392.77	0.00061835		3922.77	-0.01017039
213	-0.01052173		742.99	-0.00108128		1272.99	-0.00591618		1802.99	-0.00811258		2332.98	-0.01538847		2862.98	-0.00477411		3392.97	0.00098707		3922.97	-0.01056042
213.2	-0.00986736		743.19	-0.00130267		1273.19	-0.00636093		1803.19	-0.00704801		2333.18	-0.01575958		2863.18	-0.00443196		3393.17	0.0010755		3923.17	-0.01079521
213.4	-0.009398		743.39	-0.00174866		1273.39	-0.00704978		1803.39	-0.00734724		2333.38	-0.01602744		2863.38	-0.00419145		3393.37	0.00027159		3923.37	-0.01163074
213.6	-0.0087096		743.59	-0.00194027		1273.59	-0.00736147		1803.59	-0.00735401		2333.58	-0.01507894		2863.58	-0.0046095		3393.57	0.00117084		3923.57	-0.01230521
213.8	-0.00801227		743.79	-0.0016721		1273.79	-0.00711875		1803.79	-0.00786674		2333.78	-0.01558198		2863.78	-0.0051		3393.77	0.0012483		3923.77	-0.01216676
214	-0.00764058		743.99	-0.00131455		1273.99	-0.00687183		1803.99	-0.00755929		2333.98	-0.01533467		2863.98	-0.00539373		3393.97	0.00145268		3923.97	-0.01196609
214.2	-0.00716972		744.19	-0.00065595		1274.19	-0.00678917		1804.19	-0.00730311		2334.18	-0.01492037		2864.18	-0.00571365		3394.17	0.00190218		3924.17	-0.01212634
214.4	-0.00734067		744.39	-0.0010414		1274.39	-0.00705804		1804.39	-0.00695843		2334.38	-0.01506004		2864.38	-0.0062269		3394.37	0.00231933		3924.37	-0.01205664
214.6	-0.00685609		744.59	-0.00155429		1274.59	-0.00643263		1804.59	-0.00572225		2334.58	-0.01501586		2864.58	-0.0061003		3394.57	0.00293276		3924.57	-0.01168431
214.8	-0.00664758		744.79	-0.00136768		1274.79	-0.00723022		1804.79	-0.00482117		2334.78	-0.01582417		2864.78	-0.00638592		3394.77	0.00309231		3924.77	-0.01136158
215	-0.00664438		744.99	-0.00200217		1274.99	-0.00759339		1804.99	-0.00389655		2334.98	-0.0164225		2864.98	-0.00660279		3394.97	0.00220748		3924.97	-0.01081033
215.2	-0.00634793		745.19	-0.00205699		1275.19	-0.00792859		1805.19	-0.00277292		2335.18	-0.01623315		2865.18	-0.00696478		3395.17	0.00173659		3925.17	-0.01107617
215.4	-0.00580187		745.39	-0.00233812		1275.39	-0.00755609		1805.39	-0.00195778		2335.38	-0.01537088		2865.38	-0.00649804		3395.37	0.00164299		3925.37	-0.01271365
215.6	-0.00640995		745.59	-0.00281697		1275.59	-0.00766346		1805.59	-0.00158604		2335.58	-0.01519814		2865.58	-0.00675		3395.57	0.00184382		3925.57	-0.01274662
215.8	-0.00629485		745.79	-0.00293838		1275.79	-0.00711756		1805.79	-0.00113304		2335.78	-0.01389994		2865.78	-0.00648179		3395.77	0.00202392		3925.77	-0.01274893
216	-0.0062729		745.99	-0.00330418		1275.99	-0.00716281		1805.99	-0.00089267		2335.98	-0.01355283		2865.98	-0.00640181		3395.97	0.00159831		3925.97	-0.01257505
216.2	-0.00677716		746.19	-0.00300734		1276.19	-0.00648971		1806.19	0.00024847		2336.18	-0.01349206		2866.18	-0.00621958		3396.17	0.00102904		3926.17	-0.0125357
216.4	-0.0075531		746.39	-0.00278829		1276.39	-0.00637658		1806.39	0.00150066		2336.38	-0.01309828		2866.38	-0.00609319		3396.37	0.00044717		3926.37	-0.01193591
216.6	-0.00740131		746.59	-0.00201851		1276.59	-0.00578817		1806.59	0.00118049		2336.58	-0.01334504		2866.58	-0.00632624		3396.57	0.00042352		3926.57	-0.01100967
216.8	-0.00808197		746.79	-0.0016255		1276.79	-0.00448598		1806.79	0.00094361		2336.78	-0.01377972		2866.78	-0.00516513		3396.77	0.00013523		3926.77	-0.01036962
217	-0.00738769		746.99	-0.00079372		1276.99	-0.00313884		1806.99	0.00131044		2336.98	-0.01334063		2866.98	-0.00489816		3396.97	0.00026281		3926.97	-0.00979858
217.2	-0.00650132		747.19	-0.00047192		1277.19	-0.00281769		1807.19	0.00086378		2337.18	-0.0131528		2867.18	-0.00431518		3397.17	0.00028348		3927.17	-0.00988482
217.4	-0.00579493		747.39	-0.00005334		1277.39	-0.00287216		1807.39	-0.00001232		2337.38	-0.0127622		2867.38	-0.00379311		3397.37	0.00038968		3927.37	-0.00933906
217.6	-0.00576742		747.59	0.00025976		1277.59	-0.00128307		1807.59	-0.00061252		2337.58	-0.01201394		2867.58	-0.00299216		3397.57	0.0018742		3927.57	-0.00939866
217.8	-0.00568273		747.79	0.00049767		1277.79	-0.00021899		1807.79	-0.00113675		2337.78	-0.01337439		2867.78	-0.00247001		3397.77	0.00144249		3927.77	-0.00803862
218	-0.00528121		747.99	0.0007116		1277.99	0.00036848		1807.99	-0.00114173		2337.98	-0.0131123		2867.98	-0.00268542		3397.97	0.00168063		3927.97	-0.00741324
218.2	-0.0050038		748.19	0.0001294		1278.19	0.00024847		1808.19	-0.00224075		2338.18	-0.01374271		2868.18	-0.00210893		3398.17	0.00244496		3928.17	-0.00648145
218.4	-0.00555258		748.39	-0.00124551		1278.39	-0.00056485		1808.39	-0.00237002		2338.38	-0.01437484		2868.38	-0.00243832		3398.37	0.00283795		3928.37	-0.00584071
218.6	-0.00559009		748.59	-0.00151753		1278.59	-0.00070405		1808.59	-0.00268646		2338.58	-0.01358659		2868.58	-0.00174185		3398.57	0.00232414		3928.57	-0.00584435
218.8	-0.00555311		748.79	-0.00215712		1278.79	-0.00112106		1808.79	-0.0035259		2338.78	-0.01368679		2868.78	-0.00224594		3398.77	0.00190691		3928.77	-0.00589716
219	-0.00561562		748.99	-0.00243193		1278.99	-0.00147558		1808.99	-0.0038842		2338.98	-0.01375939		2868.98	-0.00307393		3398.97	0.00094754		3928.97	-0.00595636
219.2	-0.00481774		749.19	-0.00209168		1279.19	-0.00254597		1809.19	-0.00377685		2339.18	-0.01325648		2869.18	-0.00346457		3399.17	0.00111064		3929.17	-0.00676825
219.4	-0.00489634		749.39	-0.00206056		1279.39	-0.00303323		1809.39	-0.00440237		2339.38	-0.01296025		2869.38	-0.00425117		3399.37	0.00126249		3929.37	-0.0078053
219.6	-0.005854		749.59	-0.00249084		1279.59	-0.00349511		1809.59	-0.00377259		2339.58	-0.01329011		2869.58	-0.00520713		3399.57	0.00095368		3929.57	-0.00807183
219.8	-0.00717685		749.79	-0.00186513		1279.79	-0.0039838		1809.79	-0.00423305		2339.78	-0.01278855		2869.78	-0.00575856		3399.77	0.0006867		3929.77	-0.00856337
220	-0.00762366		749.99	-0.00134756		1279.99	-0.00437122		1809.99	-0.00370685		2339.98	-0.0132889		2869.98	-0.00667759		3399.97	0.00005073		3929.97	-0.00863109
220.2	-0.00889248		750.19	-0.00027001		1280.19	-0.00458898		1810.19	-0.00273509		2340.18	-0.01392171		2870.18	-0.00743421		3400.17	-0.00049468		3930.17	-0.00885358
220.4	-0.01057141		750.39	0.00036835		1280.39	-0.00499364		1810.39	-0.00237888		2340.38	-0.01337008		2870.38	-0.00753643		3400.37	0.00016749		3930.37	-0.00811883
220.6	-0.01042305		750.59	0.00081785		1280.59	-0.0049824		1810.59	-0.00304247		2340.58	-0.01334702		2870.58	-0.00771559		3400.57	0.00056629		3930.57	-0.00831624
220.8	-0.01157444		750.79	0.00045408		1280.79	-0.00498216		1810.79	-0.00282192		2340.78	-0.0126438		2870.78	-0.00747612		3400.77	0.00096359		3930.77	-0.00850091
221	-0.01106473		750.99	0.00055116		1280.99	-0.00444792		1810.99	-0.00245112		2340.98	-0.01194701		2870.98	-0.0078729		3400.97	0.00178853		3930.97	-0.00936082
221.2	-0.01106663		751.19	0.00068345		1281.19	-0.00479553		1811.19	-0.00315142		2341.18	-0.011991		2871.18	-0.00774167		3401.17	0.00204106		3931.17	-0.00985678
221.4	-0.01128488		751.39	0.00075105		1281.39	-0.00436712		1811.39	-0.00316468		2341.38	-0.012573		2871.38	-0.00712221		3401.37	0.0027065		3931.37	-0.01014798
221.6	-0.01219952		751.59	0.00076266		1281.59	-0.00291494		1811.59	-0.00274868		2341.58	-0.01265347		2871.58	-0.00646582		3401.57	0.00321723		3931.57	-0.00918026
221.8	-0.01248588		751.79	0.00070414		1281.79	-0.00236658		1811.79	-0.00242326		2341.78	-0.01297407		2871.78	-0.00548531		3401.77	0.00274356		3931.77	-0.00878041
222	-0.0126734		751.99	0.00023142		1281.99	-0.00214088		1811.99	-0.00330661		2341.98	-0.01269463		2871.98	-0.00554633		3401.97	0.00329502		3931.97	-0.00884999
222.2	-0.01301022		752.19	-0.00002248		1282.19	-0.0021842		1812.19	-0.00353577		2342.18	-0.01366234		2872.18	-0.00471482		3402.17	0.00415959		3932.17	-0.00820765
222.4	-0.01307606		752.39	-0.00104043		1282.39	-0.00315361		1812.39	-0.00332738		2342.38	-0.01351428		2872.38	-0.00521607		3402.37	0.00389075		3932.37	-0.00738989
222.6	-0.01202824		752.59	-0.00109083		1282.59	-0.00314246		1812.59	-0.00364016		2342.58	-0.01321445		2872.58	-0.00458494		3402.57	0.00395095		3932.57	-0.00754982
222.8	-0.01203287		752.79	-0.00105573		1282.79	-0.00265995		1812.79	-0.00407737		2342.78	-0.0133926		2872.78	-0.00537963		3402.77	0.00481472		3932.77	-0.00715686
223	-0.01085512		752.99	-0.0010061		1282.99	-0.00289963		1812.99	-0.00450126		2342.98	-0.01390397		2872.98	-0.00614481		3402.97	0.00565898		3932.97	-0.0071194
223.2	-0.00977069		753.19	-0.00086041		1283.19	-0.00300778		1813.19	-0.00401032		2343.18	-0.01368766		2873.18	-0.00606006		3403.17	0.00585452		3933.17	-0.00766174
223.4	-0.00924375		753.39	-0.00101832		1283.39	-0.00372915		1813.39	-0.00428509		2343.38	-0.01380085		2873.38	-0.00632252		3403.37	0.00627288		3933.37	-0.00843128
223.6	-0.00923812		753.59	-0.00110632		1283.59	-0.00433919		1813.59	-0.00406766		2343.58	-0.01329804		2873.58	-0.00650349		3403.57	0.00626949		3933.57	-0.0093375
223.8	-0.00941233		753.79	-0.00018359		1283.79	-0.00468397		1813.79	-0.00422312		2343.78	-0.0134383		2873.78	-0.00649599		3403.77	0.00570389		3933.77	-0.00980344
224	-0.00856105		753.99	-0.00050898		1283.99	-0.00520775		1813.99	-0.00361911		2343.98	-0.01316715		2873.98	-0.00570533		3403.97	0.00488553		3933.97	-0.00980365
224.2	-0.00942068		754.19	-0.00033456		1284.19	-0.00545822		1814.19	-0.00390391		2344.18	-0.01257165		2874.18	-0.0057154		3404.17	0.00490112		3934.17	-0.01041591
224.4	-0.00881222		754.39	0.00003081		1284.39	-0.00535775		1814.39	-0.00435604		2344.38	-0.01203816		2874.38	-0.00474469		3404.37	0.00501526		3934.37	-0.01027123
224.6	-0.00885792		754.59	-0.00043411		1284.59	-0.0049374		1814.59	-0.00443		2344.58	-0.01132346		2874.58	-0.00473247		3404.57	0.00478536		3934.57	-0.01103166
224.8	-0.00945814		754.79	-0.00093364		1284.79	-0.00566631		1814.79	-0.00441745		2344.78	-0.01073175		2874.78	-0.00473728		3404.77	0.0036124		3934.77	-0.01103194
225	-0.00826279		754.99	-0.00021595		1284.99	-0.00426271		1814.99	-0.00333388		2344.98	-0.01076244		2874.98	-0.00464028		3404.97	0.00329982		3934.97	-0.01197643
225.2	-0.00893035		755.19	0.00151978		1285.19	-0.00323895		1815.19	-0.00335139		2345.18	-0.01050775		2875.18	-0.00458818		3405.17	0.00245206		3935.17	-0.0126336
225.4	-0.01002416		755.39	0.00184994		1285.39	-0.00186601		1815.39	-0.00230376		2345.38	-0.01078827		2875.38	-0.00361004		3405.37	0.00259896		3935.37	-0.01232058
225.6	-0.01027416		755.59	0.00220376		1285.59	-0.0012666		1815.59	-0.00184214		2345.58	-0.01132413		2875.58	-0.00279778		3405.57	0.00189798		3935.57	-0.01136402
225.8	-0.00991418		755.79	0.00224628		1285.79	-0.00094092		1815.79	-0.00246155		2345.78	-0.0110404		2875.78	-0.00202126		3405.77	0.00151689		3935.77	-0.0113302
226	-0.00996553		755.99	0.00310054		1285.99	-0.00093801		1815.99	-0.00284448		2345.98	-0.01251917		2875.98	-0.00149053		3405.97	0.00153865		3935.97	-0.01003017
226.2	-0.00976623		756.19	0.00412416		1286.19	-0.00123413		1816.19	-0.00278431		2346.18	-0.0133618		2876.18	-0.00050428		3406.17	0.00154758		3936.17	-0.00954053
226.4	-0.00952885		756.39	0.00385161		1286.39	-0.001132		1816.39	-0.00290108		2346.38	-0.01277785		2876.38	-0.00093236		3406.37	0.00168341		3936.37	-0.00804094
226.6	-0.00976707		756.59	0.00377258		1286.59	-0.00082192		1816.59	-0.00335153		2346.58	-0.01274744		2876.58	-0.00052264		3406.57	0.00226087		3936.57	-0.00717146
226.8	-0.01024657		756.79	0.00400167		1286.79	-0.00023955		1816.79	-0.00355768		2346.78	-0.01284384		2876.78	-0.00149845		3406.77	0.00255081		3936.77	-0.00650625
227	-0.01033299		756.99	0.00389831		1286.99	-0.00002572		1816.99	-0.00342604		2346.98	-0.01293564		2876.98	-0.00180692		3406.97	0.00303061		3936.97	-0.00642339
227.2	-0.01016665		757.19	0.0043983		1287.19	-0.000253		1817.19	-0.00353264		2347.18	-0.01279985		2877.18	-0.00213785		3407.17	0.00261186		3937.17	-0.00691489
227.4	-0.01060506		757.39	0.00447134		1287.39	-0.00135155		1817.39	-0.00378971		2347.38	-0.01281659		2877.38	-0.00177422		3407.37	0.00323358		3937.37	-0.00718763
227.6	-0.01109305		757.59	0.00484703		1287.59	-0.00105115		1817.59	-0.00387137		2347.58	-0.01217773		2877.58	-0.00177041		3407.57	0.00326616		3937.57	-0.00704468
227.8	-0.01195814		757.79	0.00488167		1287.79	-0.00153396		1817.79	-0.00414293		2347.78	-0.01218058		2877.78	-0.00164053		3407.77	0.00219751		3937.77	-0.00783703
228	-0.01213163		757.99	0.00403481		1287.99	-0.00166345		1817.99	-0.00444331		2347.98	-0.01078193		2877.98	-0.00110532		3407.97	0.00214579		3937.97	-0.0078995
228.2	-0.01174937		758.19	0.00385459		1288.19	-0.00102048		1818.19	-0.00489732		2348.18	-0.00935402		2878.18	-0.00169155		3408.17	0.00172693		3938.17	-0.00860414
228.4	-0.01102681		758.39	0.00334006		1288.39	-0.0008026		1818.39	-0.0044582		2348.38	-0.00931387		2878.38	-0.00168867		3408.37	0.00158669		3938.37	-0.00825475
228.6	-0.01140372		758.59	0.00270928		1288.59	-0.00078796		1818.59	-0.00425944		2348.58	-0.00822578		2878.58	-0.00276917		3408.57	0.001441		3938.57	-0.0087863
228.8	-0.01093876		758.79	0.00219747		1288.79	-0.00096402		1818.79	-0.00316944		2348.78	-0.0080374		2878.78	-0.00330724		3408.77	0.00110728		3938.77	-0.00903696
229	-0.01075926		758.99	0.00244171		1288.99	-0.00018673		1818.99	-0.00191211		2348.98	-0.0082622		2878.98	-0.00335749		3408.97	0.00151028		3938.97	-0.01008456
229.2	-0.01099658		759.19	0.00219024		1289.19	0.00008925		1819.19	-0.00170637		2349.18	-0.00834619		2879.18	-0.00278295		3409.17	0.00169767		3939.17	-0.01088831
229.4	-0.01060772		759.39	0.00119362		1289.39	-0.00078343		1819.39	-0.00066667		2349.38	-0.00863264		2879.38	-0.00226214		3409.37	0.0020274		3939.37	-0.01051845
229.6	-0.00966833		759.59	0.00115722		1289.59	-0.00125656		1819.59	-0.00045002		2349.58	-0.00954598		2879.58	-0.00233093		3409.57	0.00193475		3939.57	-0.01072409
229.8	-0.00911659		759.79	0.00015576		1289.79	-0.00123626		1819.79	-0.00015877		2349.78	-0.00932413		2879.78	-0.00231921		3409.77	0.0017561		3939.77	-0.01020986
230	-0.00938028		759.99	0.00045388		1289.99	-0.00148806		1819.99	-0.00013343		2349.98	-0.01087794		2879.98	-0.0027534		3409.97	0.00044474		3939.97	-0.00925286
230.2	-0.0099159		760.19	-0.00026287		1290.19	-0.00117251		1820.19	-0.0003118		2350.18	-0.01143788		2880.18	-0.00302754		3410.17	-0.00015365		3940.17	-0.00870915
230.4	-0.00924499		760.39	-0.00038706		1290.39	-0.00146758		1820.39	-0.00033527		2350.38	-0.01192788		2880.38	-0.00388655		3410.37	0.00014582		3940.37	-0.00704778
230.6	-0.00990321		760.59	-0.00075457		1290.59	-0.00150298		1820.59	-0.00090504		2350.58	-0.01204814		2880.58	-0.0038322		3410.57	-0.00001437		3940.57	-0.00589645
230.8	-0.00965825		760.79	0.00022168		1290.79	-0.00142591		1820.79	-0.00122881		2350.78	-0.01242665		2880.78	-0.00471888		3410.77	0.00030423		3940.77	-0.00566837
231	-0.01030685		760.99	0.00055855		1290.99	-0.001954		1820.99	-0.00192197		2350.98	-0.01279266		2880.98	-0.00501843		3410.97	0.00110083		3940.97	-0.00538733
231.2	-0.01002679		761.19	0.0004624		1291.19	-0.00298596		1821.19	-0.00269529		2351.18	-0.01266483		2881.18	-0.00532572		3411.17	0.0006775		3941.17	-0.0059866
231.4	-0.01102509		761.39	-0.00008088		1291.39	-0.00327312		1821.39	-0.00255582		2351.38	-0.01199182		2881.38	-0.005401		3411.37	0.0013898		3941.37	-0.00553028
231.6	-0.01109131		761.59	0.00000491		1291.59	-0.00378877		1821.59	-0.00296054		2351.58	-0.01188122		2881.58	-0.00561178		3411.57	0.00135619		3941.57	-0.00543752
231.8	-0.01163493		761.79	-0.0003521		1291.79	-0.0045716		1821.79	-0.00260308		2351.78	-0.01115657		2881.78	-0.00563773		3411.77	0.00044564		3941.77	-0.00563157
232	-0.01113706		761.99	-0.00055107		1291.99	-0.00460524		1821.99	-0.00257226		2351.98	-0.0097452		2881.98	-0.00534526		3411.97	0.00085873		3941.97	-0.00574709
232.2	-0.01070088		762.19	-0.00074863		1292.19	-0.00433017		1822.19	-0.00315488		2352.18	-0.00892168		2882.18	-0.00498643		3412.17	0.00039175		3942.17	-0.00603716
232.4	-0.01049064		762.39	-0.00078022		1292.39	-0.00437415		1822.39	-0.00310426		2352.38	-0.00908396		2882.38	-0.00423927		3412.37	0.00042327		3942.37	-0.00565417
232.6	-0.01041862		762.59	-0.00160762		1292.59	-0.00316986		1822.59	-0.00374878		2352.58	-0.00855622		2882.58	-0.00424279		3412.57	0.00094533		3942.57	-0.00619824
232.8	-0.01022084		762.79	-0.00215904		1292.79	-0.0029391		1822.79	-0.00277652		2352.78	-0.00916929		2882.78	-0.00367437		3412.77	0.00144249		3942.77	-0.00609837
233	-0.00971642		762.99	-0.00168533		1292.99	-0.00247131		1822.99	-0.00308692		2352.98	-0.00907169		2882.98	-0.00341501		3412.97	0.00167247		3942.97	-0.00650838
233.2	-0.00899084		763.19	-0.00141382		1293.19	-0.00161876		1823.19	-0.00308077		2353.18	-0.00874421		2883.18	-0.00257932		3413.17	0.00183672		3943.17	-0.0069047
233.4	-0.00868036		763.39	-0.00108043		1293.39	-0.00180829		1823.39	-0.00249482		2353.38	-0.0084994		2883.38	-0.00253349		3413.37	0.00195777		3943.37	-0.00648944
233.6	-0.00841468		763.59	-0.00059063		1293.59	-0.00136166		1823.59	-0.00208945		2353.58	-0.00955756		2883.58	-0.00205754		3413.57	0.00146302		3943.57	-0.00685821
233.8	-0.00796429		763.79	-0.00057736		1293.79	-0.00059765		1823.79	-0.00190454		2353.78	-0.00974312		2883.78	-0.00151605		3413.77	0.00156024		3943.77	-0.00608387
234	-0.0087352		763.99	0.00044489		1293.99	0.00048762		1823.99	-0.00179911		2353.98	-0.01125224		2883.98	-0.00066168		3413.97	0.00094426		3943.97	-0.0051359
234.2	-0.00879411		764.19	0.00112428		1294.19	0.00132115		1824.19	-0.00125524		2354.18	-0.01245499		2884.18	-0.00035022		3414.17	0.00129828		3944.17	-0.0046361
234.4	-0.00816404		764.39	0.00175064		1294.39	0.00156043		1824.39	-0.00009376		2354.38	-0.01270487		2884.38	0.00046958		3414.37	0.00152487		3944.37	-0.00407268
234.6	-0.00849289		764.59	0.00146059		1294.59	0.00229862		1824.59	0.00007815		2354.58	-0.01317589		2884.58	0.00065223		3414.57	0.00158617		3944.57	-0.00408598
234.8	-0.00833965		764.79	0.00191496		1294.79	0.00208561		1824.79	-0.00021796		2354.78	-0.01374763		2884.78	0.00064259		3414.77	0.00178043		3944.77	-0.0042067
235	-0.00793199		764.99	0.00110374		1294.99	0.00125074		1824.99	0.00044612		2354.98	-0.01426293		2884.98	0.00040189		3414.97	0.00192745		3944.97	-0.00478587
235.2	-0.00781715		765.19	0.00088046		1295.19	0.00108067		1825.19	0.00126127		2355.18	-0.01531526		2885.18	-0.00051809		3415.17	0.00199079		3945.17	-0.00623614
235.4	-0.00900162		765.39	0.0016836		1295.39	0.00109908		1825.39	0.00165785		2355.38	-0.01588701		2885.38	-0.00161992		3415.37	0.00202779		3945.37	-0.00602525
235.6	-0.00813917		765.59	0.00244276		1295.59	0.00077646		1825.59	0.00204006		2355.58	-0.01570153		2885.58	-0.00178278		3415.57	0.0009081		3945.57	-0.00723744
235.8	-0.00851795		765.79	0.00215447		1295.79	0.0009135		1825.79	0.00266105		2355.78	-0.01507486		2885.78	-0.00294323		3415.77	0.00032146		3945.77	-0.0078652
236	-0.00865285		765.99	0.00212023		1295.99	0.00098379		1825.99	0.00151353		2355.98	-0.01490788		2885.98	-0.00371236		3415.97	0.0000208		3945.97	-0.00904689
236.2	-0.00914127		766.19	0.00199272		1296.19	0.00115247		1826.19	0.00047657		2356.18	-0.01454965		2886.18	-0.00425117		3416.17	-0.00029074		3946.17	-0.00889634
236.4	-0.00914639		766.39	0.00137281		1296.39	0.00080854		1826.39	-0.00047484		2356.38	-0.01482927		2886.38	-0.0045431		3416.37	-0.00009468		3946.37	-0.00857984
236.6	-0.00938015		766.59	0.00024096		1296.59	0.00163979		1826.59	-0.00111932		2356.58	-0.01428386		2886.58	-0.00593219		3416.57	0.0005788		3946.57	-0.00939644
236.8	-0.00896511		766.79	0.00014542		1296.79	0.00084133		1826.79	-0.00159052		2356.78	-0.01396486		2886.78	-0.00612463		3416.77	0.00053429		3946.77	-0.00973832
237	-0.00885801		766.99	0.00101626		1296.99	0.00134091		1826.99	-0.00342554		2356.98	-0.01261324		2886.98	-0.00666149		3416.97	0.00094013		3946.97	-0.01014564
237.2	-0.00990243		767.19	0.00203298		1297.19	0.00126267		1827.19	-0.0040111		2357.18	-0.01154225		2887.18	-0.00631341		3417.17	0.00116792		3947.17	-0.01015369
237.4	-0.00997464		767.39	0.00248244		1297.39	0.00091201		1827.39	-0.00433053		2357.38	-0.01117998		2887.38	-0.00615805		3417.37	0.00120101		3947.37	-0.00984897
237.6	-0.00973371		767.59	0.00244392		1297.59	0.00073387		1827.59	-0.00450485		2357.58	-0.00993196		2887.58	-0.00593668		3417.57	0.00103612		3947.57	-0.01012505
237.8	-0.01028569		767.79	0.00268284		1297.79	0.00124246		1827.79	-0.00487701		2357.78	-0.00890776		2887.78	-0.00543647		3417.77	0.00172871		3947.77	-0.00914269
238	-0.01086453		767.99	0.00265596		1297.99	0.00177884		1827.99	-0.00414751		2357.98	-0.00904561		2887.98	-0.00493012		3417.97	0.0011675		3947.97	-0.00865436
238.2	-0.01103645		768.19	0.00247691		1298.19	0.00204645		1828.19	-0.00339125		2358.18	-0.00881313		2888.18	-0.00447397		3418.17	0.0011154		3948.17	-0.00829706
238.4	-0.01001725		768.39	0.00134706		1298.39	0.0016359		1828.39	-0.00253282		2358.38	-0.0075215		2888.38	-0.00350398		3418.37	0.00118743		3948.37	-0.00765532
238.6	-0.00946802		768.59	0.00097459		1298.59	0.00156566		1828.59	-0.0025996		2358.58	-0.00728302		2888.58	-0.00290001		3418.57	0.00156935		3948.57	-0.00758051
238.8	-0.0087811		768.79	0.00099463		1298.79	0.0014007		1828.79	-0.00231122		2358.78	-0.00700272		2888.78	-0.0027168		3418.77	0.00252777		3948.77	-0.00725023
239	-0.00778316		768.99	0.00069466		1298.99	0.00129227		1828.99	-0.00187485		2358.98	-0.00740937		2888.98	-0.00326535		3418.97	0.00304873		3948.97	-0.00718217
239.2	-0.00740449		769.19	0.0017874		1299.19	0.00157609		1829.19	-0.00104052		2359.18	-0.00753282		2889.18	-0.00389246		3419.17	0.00309653		3949.17	-0.00675236
239.4	-0.00715771		769.39	0.00215447		1299.39	0.00132652		1829.39	-0.00123866		2359.38	-0.00675854		2889.38	-0.0041977		3419.37	0.00192904		3949.37	-0.0062114
239.6	-0.00605156		769.59	0.00186545		1299.59	0.0012232		1829.59	-0.00038013		2359.58	-0.00639209		2889.58	-0.00421069		3419.57	0.00134509		3949.57	-0.00667936
239.8	-0.00658097		769.79	0.00094195		1299.79	0.00180903		1829.79	-0.00037968		2359.78	-0.00735958		2889.78	-0.00495942		3419.77	0.00203167		3949.77	-0.00673986
240	-0.0065069		769.99	0.00020175		1299.99	0.00137803		1829.99	-0.00072942		2359.98	-0.00871468		2889.98	-0.00486748		3419.97	0.00228074		3949.97	-0.00701073
240.2	-0.00611606		770.19	-0.00092345		1300.19	0.00155546		1830.19	-0.00146136		2360.18	-0.00889255		2890.18	-0.00438598		3420.17	0.00206249		3950.17	-0.00729509
240.4	-0.00559195		770.39	-0.0020198		1300.39	0.0014384		1830.39	-0.00141612		2360.38	-0.00983529		2890.38	-0.00414812		3420.37	0.00247494		3950.37	-0.00723565
240.6	-0.00529298		770.59	-0.00349358		1300.59	0.00163905		1830.59	-0.00215175		2360.58	-0.01016613		2890.58	-0.00377415		3420.57	0.00225958		3950.57	-0.00870695
240.8	-0.00639666		770.79	-0.00359163		1300.79	0.0019384		1830.79	-0.00251522		2360.78	-0.01053229		2890.78	-0.00342941		3420.77	0.00168055		3950.77	-0.00919052
241	-0.00651326		770.99	-0.0028418		1300.99	0.00229445		1830.99	-0.0029409		2360.98	-0.01100943		2890.98	-0.0029085		3420.97	0.00162924		3950.97	-0.00955322
241.2	-0.00677351		771.19	-0.00325616		1301.19	0.00221369		1831.19	-0.00313827		2361.18	-0.01066506		2891.18	-0.00316781		3421.17	0.00130356		3951.17	-0.00920636
241.4	-0.00714996		771.39	-0.00389279		1301.39	0.00222955		1831.39	-0.00390017		2361.38	-0.01105818		2891.38	-0.00380367		3421.37	0.0010228		3951.37	-0.00911574
241.6	-0.00791826		771.59	-0.00340251		1301.59	0.00185553		1831.59	-0.00407906		2361.58	-0.01032582		2891.58	-0.00356707		3421.57	0.00091676		3951.57	-0.0089405
241.8	-0.00798376		771.79	-0.00365309		1301.79	0.00242627		1831.79	-0.00443675		2361.78	-0.01063283		2891.78	-0.00298911		3421.77	0.00128313		3951.77	-0.00899842
242	-0.00766921		771.99	-0.00395691		1301.99	0.00270218		1831.99	-0.00391892		2361.98	-0.01139575		2891.98	-0.00318618		3421.97	0.00068873		3951.97	-0.00821602
242.2	-0.00806897		772.19	-0.0048295		1302.19	0.00278046		1832.19	-0.00426183		2362.18	-0.01104639		2892.18	-0.00272427		3422.17	0.00014631		3952.17	-0.00768495
242.4	-0.00773556		772.39	-0.00459361		1302.39	0.00240195		1832.39	-0.00353456		2362.38	-0.01072758		2892.38	-0.00270967		3422.37	0.00043607		3952.37	-0.00701228
242.6	-0.00811845		772.59	-0.00395615		1302.59	0.00322976		1832.59	-0.00285351		2362.58	-0.01038281		2892.58	-0.00297083		3422.57	0.00066591		3952.57	-0.00665645
242.8	-0.00856104		772.79	-0.00345152		1302.79	0.00295963		1832.79	-0.0027068		2362.78	-0.00970759		2892.78	-0.0039678		3422.77	0.00126414		3952.77	-0.00594498
243	-0.00864551		772.99	-0.00261448		1302.99	0.00254616		1832.99	-0.00261222		2362.98	-0.00920115		2892.98	-0.00522151		3422.97	0.00127458		3952.97	-0.005679
243.2	-0.00912108		773.19	-0.0012386		1303.19	0.00212572		1833.19	-0.00219503		2363.18	-0.0089683		2893.18	-0.00531779		3423.17	0.00054917		3953.17	-0.00573539
243.4	-0.01003707		773.39	-0.00032929		1303.39	0.0017651		1833.39	-0.00129622		2363.38	-0.00919465		2893.38	-0.00540934		3423.37	-0.00021126		3953.37	-0.00663569
243.6	-0.00957203		773.59	0.00032631		1303.59	0.00197706		1833.59	-0.00051436		2363.58	-0.00904511		2893.58	-0.00526063		3423.57	-0.00023768		3953.57	-0.00746793
243.8	-0.00956921		773.79	-0.00004798		1303.79	0.00211738		1833.79	-0.00035856		2363.78	-0.00977165		2893.78	-0.00534735		3423.77	-0.00002539		3953.77	-0.00809171
244	-0.00982287		773.99	-0.00016076		1303.99	0.00110911		1833.99	0.00004833		2363.98	-0.01004417		2893.98	-0.00446641		3423.97	0.00031277		3953.97	-0.00887903
244.2	-0.00946724		774.19	-0.00060038		1304.19	0.0011782		1834.19	0.00050567		2364.18	-0.01014014		2894.18	-0.00386152		3424.17	-0.00013501		3954.17	-0.00906916
244.4	-0.00967923		774.39	-0.00024062		1304.39	0.00101704		1834.39	0.00144731		2364.38	-0.01008019		2894.38	-0.00357187		3424.37	-0.00033385		3954.37	-0.00905736
244.6	-0.00964065		774.59	0.00048876		1304.59	0.00007939		1834.59	0.00119495		2364.58	-0.01038677		2894.58	-0.0030893		3424.57	-0.0010716		3954.57	-0.00996647
244.8	-0.01025672		774.79	0.00092549		1304.79	-0.00009395		1834.79	0.00165566		2364.78	-0.01037228		2894.78	-0.00307401		3424.77	-0.00118195		3954.77	-0.00969554
245	-0.00894622		774.99	0.00110259		1304.99	-0.00072035		1834.99	0.00166201		2364.98	-0.01100978		2894.98	-0.0022063		3424.97	-0.00051174		3954.97	-0.00984721
245.2	-0.00882822		775.19	0.00081603		1305.19	-0.00069376		1835.19	0.00049823		2365.18	-0.01116905		2895.18	-0.0033275		3425.17	0.00057718		3955.17	-0.0097623
245.4	-0.0087874		775.39	0.00090723		1305.39	-0.00078689		1835.39	-0.00004092		2365.38	-0.01208298		2895.38	-0.00367624		3425.37	0.0010781		3955.37	-0.00939067
245.6	-0.00816267		775.59	0.00081888		1305.59	-0.00109295		1835.59	-0.00011414		2365.58	-0.01226034		2895.58	-0.00351402		3425.57	0.00175427		3955.57	-0.00889232
245.8	-0.00693012		775.79	0.00005332		1305.79	-0.00005241		1835.79	-0.00114059		2365.78	-0.01277595		2895.78	-0.00306938		3425.77	0.00226852		3955.77	-0.00880676
246	-0.00621721		775.99	-0.00013423		1305.99	0.00033542		1835.99	-0.00160419		2365.98	-0.01328164		2895.98	-0.00271352		3425.97	0.00215932		3955.97	-0.00747691
246.2	-0.0063962		776.19	0.0000702		1306.19	0.00112998		1836.19	-0.00231158		2366.18	-0.01227585		2896.18	-0.00174962		3426.17	0.00223003		3956.17	-0.00727598
246.4	-0.00605292		776.39	0.00053043		1306.39	0.00159222		1836.39	-0.00188922		2366.38	-0.01160755		2896.38	-0.00152918		3426.37	0.00356858		3956.37	-0.00700756
246.6	-0.00613477		776.59	0.00028873		1306.59	0.00243358		1836.59	-0.00165336		2366.58	-0.01011847		2896.58	-0.00209589		3426.57	0.00344607		3956.57	-0.00683988
246.8	-0.0068572		776.79	0.00017062		1306.79	0.00209475		1836.79	-0.00263053		2366.78	-0.00912353		2896.78	-0.00177895		3426.77	0.00422923		3956.77	-0.0064309
247	-0.00777141		776.99	0.00050621		1306.99	0.00225195		1836.99	-0.00291344		2366.98	-0.00912361		2896.98	-0.00242962		3426.97	0.0040138		3956.97	-0.00675064
247.2	-0.00886961		777.19	0.00091805		1307.19	0.00256682		1837.19	-0.00321962		2367.18	-0.00849901		2897.18	-0.0017283		3427.17	0.00351606		3957.17	-0.0059876
247.4	-0.00965498		777.39	0.0010196		1307.39	0.00257701		1837.39	-0.00204477		2367.38	-0.00774921		2897.38	-0.00247766		3427.37	0.00319793		3957.37	-0.00644233
247.6	-0.0093979		777.59	0.00041121		1307.59	0.00309196		1837.59	-0.00187645		2367.58	-0.00758144		2897.58	-0.00275784		3427.57	0.00345172		3957.57	-0.00674296
247.8	-0.01078535		777.79	-0.00000142		1307.79	0.00282211		1837.79	-0.00145596		2367.78	-0.00737787		2897.78	-0.00244251		3427.77	0.00319534		3957.77	-0.00748685
248	-0.01161231		777.99	-0.0000492		1307.99	0.00307823		1837.99	-0.00124273		2367.98	-0.0068682		2897.98	-0.0018574		3427.97	0.00369493		3957.97	-0.00733802
248.2	-0.01191776		778.19	-0.00047686		1308.19	0.00325346		1838.19	-0.00012907		2368.18	-0.00655607		2898.18	-0.00238841		3428.17	0.00328138		3958.17	-0.00718683
248.4	-0.01200676		778.39	0.00005136		1308.39	0.00306539		1838.39	0.00034117		2368.38	-0.00584687		2898.38	-0.00313069		3428.37	0.00287092		3958.37	-0.00728203
248.6	-0.01221887		778.59	-0.00022069		1308.59	0.00231161		1838.59	0.00011717		2368.58	-0.00649061		2898.58	-0.00333617		3428.57	0.00291291		3958.57	-0.00710718
248.8	-0.01161821		778.79	-0.00090656		1308.79	0.00267826		1838.79	-0.0001857		2368.78	-0.00768161		2898.78	-0.00358569		3428.77	0.00332317		3958.77	-0.00629817
249	-0.01088811		778.99	-0.00110825		1308.99	0.00366573		1838.99	-0.00037674		2368.98	-0.0081258		2898.98	-0.00397981		3428.97	0.00356581		3958.97	-0.00722058
249.2	-0.0104353		779.19	-0.00070375		1309.19	0.00422908		1839.19	-0.0011992		2369.18	-0.00917275		2899.18	-0.00509504		3429.17	0.00317548		3959.17	-0.00696161
249.4	-0.00981627		779.39	0.00000538		1309.39	0.00396149		1839.39	-0.0013944		2369.38	-0.01003705		2899.38	-0.00450099		3429.37	0.00227316		3959.37	-0.00670866
249.6	-0.00922765		779.59	0.00062683		1309.59	0.00383076		1839.59	-0.00159363		2369.58	-0.0099683		2899.58	-0.00422665		3429.57	0.00202515		3959.57	-0.00648528
249.8	-0.00860104		779.79	0.00105081		1309.79	0.00350106		1839.79	-0.00188867		2369.78	-0.01105785		2899.78	-0.00279005		3429.77	0.00177038		3959.77	-0.00655797
250	-0.00797556		779.99	0.00076428		1309.99	0.00302954		1839.99	-0.00226232		2369.98	-0.0112589		2899.98	-0.0018978		3429.97	0.0012345		3959.97	-0.00632342
250.2	-0.00788383		780.19	0.0012199		1310.19	0.00293368		1840.19	-0.0027944		2370.18	-0.01057402		2900.18	-0.00108806		3430.17	0.00112744		3960.17	-0.0061625
250.4	-0.00720132		780.39	0.00044946		1310.39	0.002328		1840.39	-0.00239364		2370.38	-0.01072923		2900.38	-0.00100546		3430.37	0.0010247		3960.37	-0.00635778
250.6	-0.0080912		780.59	0.00009497		1310.59	0.0010733		1840.59	-0.00217999		2370.58	-0.01125598		2900.58	-0.00004542		3430.57	0.00059688		3960.57	-0.0058829
250.8	-0.00827172		780.79	0.00000448		1310.79	0.00069155		1840.79	-0.00281742		2370.78	-0.01171496		2900.78	0.00002116		3430.77	0.00145208		3960.77	-0.00566293
251	-0.00887145		780.99	0.0003165		1310.99	0.0005175		1840.99	-0.00201639		2370.98	-0.01221137		2900.98	-0.00116102		3430.97	0.00127901		3960.97	-0.00523679
251.2	-0.00906995		781.19	0.00033062		1311.19	0.00042504		1841.19	-0.00171578		2371.18	-0.01138653		2901.18	-0.00119108		3431.17	0.00114024		3961.17	-0.00486615
251.4	-0.008743		781.39	0.00059463		1311.39	-0.00010221		1841.39	-0.00145199		2371.38	-0.01177708		2901.38	-0.0019169		3431.37	0.00148247		3961.37	-0.00572458
251.6	-0.00861713		781.59	0.00004353		1311.59	0.00020375		1841.59	-0.00115818		2371.58	-0.01246983		2901.58	-0.00178834		3431.57	0.00189575		3961.57	-0.00632785
251.8	-0.00881393		781.79	0.00079006		1311.79	0.00019425		1841.79	-0.00115386		2371.78	-0.01241715		2901.78	-0.00162212		3431.77	0.00205982		3961.77	-0.00606906
252	-0.00814824		781.99	-0.00000189		1311.99	0.00006824		1841.99	-0.00097612		2371.98	-0.0123256		2901.98	-0.00260067		3431.97	0.00276294		3961.97	-0.00573017
252.2	-0.00806634		782.19	-0.00048203		1312.19	-0.00054506		1842.19	-0.0003522		2372.18	-0.01203895		2902.18	-0.00348232		3432.17	0.00240255		3962.17	-0.00573191
252.4	-0.00766603		782.39	-0.00049632		1312.39	-0.00016835		1842.39	0.00007598		2372.38	-0.01189361		2902.38	-0.00486083		3432.37	0.00262015		3962.37	-0.00523776
252.6	-0.00722811		782.59	-0.00063656		1312.59	-0.00040471		1842.59	-0.0002912		2372.58	-0.01222412		2902.58	-0.00612867		3432.57	0.00265984		3962.57	-0.0050751
252.8	-0.00710746		782.79	0.0001017		1312.79	0.00045988		1842.79	-0.00044003		2372.78	-0.01189038		2902.78	-0.00651549		3432.77	0.00286666		3962.77	-0.00465242
253	-0.00700013		782.99	0.00021312		1312.99	0.00108108		1842.99	-0.0005312		2372.98	-0.01096498		2902.98	-0.00677807		3432.97	0.00212107		3962.97	-0.00547572
253.2	-0.00733076		783.19	0.00160792		1313.19	0.00195078		1843.19	-0.00066874		2373.18	-0.0118287		2903.18	-0.00736959		3433.17	0.00163821		3963.17	-0.00507635
253.4	-0.00786816		783.39	0.00187118		1313.39	0.00152855		1843.39	-0.00061185		2373.38	-0.01154983		2903.38	-0.00697984		3433.37	0.0015784		3963.37	-0.00599757
253.6	-0.00833022		783.59	0.00179736		1313.59	0.00111644		1843.59	-0.00079547		2373.58	-0.01093758		2903.58	-0.00690711		3433.57	0.00181489		3963.57	-0.00591237
253.8	-0.00904185		783.79	0.00120145		1313.79	0.00106146		1843.79	-0.00147767		2373.78	-0.01142847		2903.78	-0.00559966		3433.77	0.00207346		3963.77	-0.00593714
254	-0.00897092		783.99	0.00085703		1313.99	0.0014997		1843.99	-0.00223739		2373.98	-0.01034291		2903.98	-0.00526219		3433.97	0.001267		3963.97	-0.00559797
254.2	-0.00934725		784.19	0.00135763		1314.19	0.0017052		1844.19	-0.00269539		2374.18	-0.00991862		2904.18	-0.00500591		3434.17	0.00166273		3964.17	-0.0054014
254.4	-0.00956696		784.39	0.00086983		1314.39	0.00138083		1844.39	-0.00326211		2374.38	-0.0100652		2904.38	-0.00516153		3434.37	0.00132472		3964.37	-0.0055951
254.6	-0.01037169		784.59	0.00083165		1314.59	0.00120865		1844.59	-0.00375611		2374.58	-0.01001358		2904.58	-0.00435181		3434.57	0.00170382		3964.57	-0.00498196
254.8	-0.01021392		784.79	0.00114863		1314.79	0.00185433		1844.79	-0.00386364		2374.78	-0.01038453		2904.78	-0.00462282		3434.77	0.00236543		3964.77	-0.00494394
255	-0.01003564		784.99	0.00156888		1314.99	0.00171486		1844.99	-0.00349616		2374.98	-0.01006066		2904.98	-0.00457542		3434.97	0.00208397		3964.97	-0.00469317
255.2	-0.00985735		785.19	0.0019912		1315.19	0.00169728		1845.19	-0.00467441		2375.18	-0.00972948		2905.18	-0.00379836		3435.17	0.00190421		3965.17	-0.00493396
255.4	-0.00945784		785.39	0.00237414		1315.39	0.0010905		1845.39	-0.00533045		2375.38	-0.01092509		2905.38	-0.00362739		3435.37	0.00232162		3965.37	-0.0054629
255.6	-0.00907985		785.59	0.00254146		1315.59	0.00133691		1845.59	-0.00505406		2375.58	-0.0110782		2905.58	-0.00349367		3435.57	0.00254598		3965.57	-0.00581486
255.8	-0.00901036		785.79	0.00351968		1315.79	0.00102445		1845.79	-0.00578039		2375.78	-0.01183111		2905.78	-0.00289876		3435.77	0.00228622		3965.77	-0.00598518
256	-0.00938708		785.99	0.00405113		1315.99	0.00004255		1845.99	-0.00574754		2375.98	-0.01223748		2905.98	-0.00294561		3435.97	0.00156616		3965.97	-0.00696124
256.2	-0.00982309		786.19	0.00534195		1316.19	-0.00040103		1846.19	-0.00604049		2376.18	-0.01181271		2906.18	-0.00249839		3436.17	0.00134086		3966.17	-0.00707103
256.4	-0.00938193		786.39	0.00577136		1316.39	0.00021154		1846.39	-0.00606765		2376.38	-0.01205036		2906.38	-0.00353384		3436.37	0.00148899		3966.37	-0.00793132
256.6	-0.009625		786.59	0.0063194		1316.59	0.00010701		1846.59	-0.0068457		2376.58	-0.01186958		2906.58	-0.00338958		3436.57	0.00189035		3966.57	-0.00793409
256.8	-0.01000223		786.79	0.00655498		1316.79	0.0010823		1846.79	-0.00663606		2376.78	-0.01137633		2906.78	-0.00221522		3436.77	0.00208054		3966.77	-0.00740895
257	-0.01023729		786.99	0.00588721		1316.99	0.00188498		1846.99	-0.00658837		2376.98	-0.01174159		2906.98	-0.0017129		3436.97	0.00207396		3966.97	-0.00786211
257.2	-0.01139426		787.19	0.00573348		1317.19	0.0021787		1847.19	-0.00578921		2377.18	-0.01251979		2907.18	-0.00095107		3437.17	0.00221974		3967.17	-0.00810667
257.4	-0.01211992		787.39	0.00461424		1317.39	0.00209247		1847.39	-0.00475263		2377.38	-0.01206966		2907.38	-0.00093925		3437.37	0.00247917		3967.37	-0.00802664
257.6	-0.01173252		787.59	0.00421287		1317.59	0.00168187		1847.59	-0.0040686		2377.58	-0.01215226		2907.58	-0.00056637		3437.57	0.00268549		3967.57	-0.00674918
257.8	-0.01139458		787.79	0.00324012		1317.79	0.0024874		1847.79	-0.00266577		2377.78	-0.01206404		2907.78	-0.00012619		3437.77	0.0024291		3967.77	-0.00663145
258	-0.01100877		787.99	0.00267572		1317.99	0.00266309		1847.99	-0.00220829		2377.98	-0.01138277		2907.98	-0.00090538		3437.97	0.00239361		3967.97	-0.0055652
258.2	-0.0117708		788.19	0.00214208		1318.19	0.0028794		1848.19	-0.00230337		2378.18	-0.01113047		2908.18	-0.00154716		3438.17	0.00303882		3968.17	-0.00486519
258.4	-0.01177945		788.39	0.00038233		1318.39	0.00326566		1848.39	-0.00209861		2378.38	-0.01036639		2908.38	-0.00155011		3438.37	0.00280265		3968.37	-0.00404909
258.6	-0.01199465		788.59	-0.00045312		1318.59	0.0029389		1848.59	-0.0020212		2378.58	-0.00942316		2908.58	-0.00138097		3438.57	0.00362659		3968.57	-0.00288151
258.8	-0.01180494		788.79	-0.00147962		1318.79	0.00265824		1848.79	-0.00146723		2378.78	-0.00845199		2908.78	-0.0019819		3438.77	0.00433483		3968.77	-0.00330168
259	-0.0108792		788.99	-0.00157156		1318.99	0.00204487		1848.99	-0.0008533		2378.98	-0.00805266		2908.98	-0.00161705		3438.97	0.00452523		3968.97	-0.00341318
259.2	-0.01057938		789.19	-0.00184053		1319.19	0.00225092		1849.19	-0.00089371		2379.18	-0.00713926		2909.18	-0.0025023		3439.17	0.0049683		3969.17	-0.00319781
259.4	-0.01069289		789.39	-0.00088894		1319.39	0.00194835		1849.39	-0.00094659		2379.38	-0.00814133		2909.38	-0.00315019		3439.37	0.00519415		3969.37	-0.00338635
259.6	-0.01043871		789.59	-0.00087298		1319.59	0.00231995		1849.59	-0.00140806		2379.58	-0.00770762		2909.58	-0.00387849		3439.57	0.00620667		3969.57	-0.00289778
259.8	-0.01100828		789.79	-0.00060585		1319.79	0.00169674		1849.79	-0.00215072		2379.78	-0.00852608		2909.78	-0.00444532		3439.77	0.00637665		3969.77	-0.00367959
260	-0.01135235		789.99	0.00023815		1319.99	0.00175795		1849.99	-0.00130934		2379.98	-0.00912579		2909.98	-0.00476143		3439.97	0.0061062		3969.97	-0.00411332
260.2	-0.01007883		790.19	0.00017702		1320.19	0.00152845		1850.19	-0.00240323		2380.18	-0.00858076		2910.18	-0.00530829		3440.17	0.00597476		3970.17	-0.00467189
260.4	-0.00948046		790.39	0.00006105		1320.39	0.00154229		1850.39	-0.00292661		2380.38	-0.00906671		2910.38	-0.00586047		3440.37	0.0063503		3970.37	-0.00480632
260.6	-0.00947705		790.59	0.00031169		1320.59	0.00126956		1850.59	-0.00375743		2380.58	-0.00916102		2910.58	-0.00497343		3440.57	0.00653163		3970.57	-0.00396079
260.8	-0.00927794		790.79	0.00005218		1320.79	0.00101595		1850.79	-0.00356166		2380.78	-0.00993926		2910.78	-0.0042436		3440.77	0.00541879		3970.77	-0.00358957
261	-0.00950658		790.99	0.00057148		1320.99	0.00138872		1850.99	-0.00314243		2380.98	-0.01096739		2910.98	-0.00384215		3440.97	0.00459966		3970.97	-0.00342673
261.2	-0.00854341		791.19	0.00100154		1321.19	0.00047545		1851.19	-0.00148575		2381.18	-0.01218227		2911.18	-0.00352847		3441.17	0.00322028		3971.17	-0.00338251
261.4	-0.00758343		791.39	0.00099784		1321.39	0.00108586		1851.39	-0.00079498		2381.38	-0.01239303		2911.38	-0.00420228		3441.37	0.00257344		3971.37	-0.00329979
261.6	-0.00686725		791.59	0.00127259		1321.59	0.00142443		1851.59	-0.00023357		2381.58	-0.01367171		2911.58	-0.00336126		3441.57	0.00156711		3971.57	-0.00382109
261.8	-0.0070098		791.79	0.00159078		1321.79	0.0023218		1851.79	-0.00083287		2381.78	-0.01414386		2911.78	-0.00326653		3441.77	0.00021464		3971.77	-0.00430018
262	-0.00732531		791.99	0.0016132		1321.99	0.00243215		1851.99	-0.00145874		2381.98	-0.01355961		2911.98	-0.00271099		3441.97	-0.00041094		3971.97	-0.00406794
262.2	-0.007549		792.19	0.00140279		1322.19	0.00226442		1852.19	-0.00229733		2382.18	-0.01273153		2912.18	-0.00223736		3442.17	-0.00134161		3972.17	-0.00409829
262.4	-0.00768947		792.39	0.0017283		1322.39	0.00317841		1852.39	-0.00196971		2382.38	-0.01129946		2912.38	-0.00130215		3442.37	-0.00239279		3972.37	-0.00446176
262.6	-0.00810116		792.59	0.002144		1322.59	0.00209145		1852.59	-0.00228983		2382.58	-0.01108429		2912.58	-0.00102669		3442.57	-0.00228167		3972.57	-0.00498302
262.8	-0.00844586		792.79	0.00253417		1322.79	0.00217999		1852.79	-0.00167224		2382.78	-0.01051219		2912.78	-0.00082583		3442.77	-0.00248122		3972.77	-0.00614755
263	-0.0082196		792.99	0.00330284		1322.99	0.00252182		1852.99	-0.00097949		2382.98	-0.01066972		2912.98	-0.00035748		3442.97	-0.00295857		3972.97	-0.00591269
263.2	-0.00893916		793.19	0.00289429		1323.19	0.00319995		1853.19	-0.00169504		2383.18	-0.01104728		2913.18	-0.00129235		3443.17	-0.00221933		3973.17	-0.00563272
263.4	-0.00968574		793.39	0.00295939		1323.39	0.00288716		1853.39	-0.00203973		2383.38	-0.01165973		2913.38	-0.00145514		3443.37	-0.00210736		3973.37	-0.00602708
263.6	-0.00956795		793.59	0.00155459		1323.59	0.00278354		1853.59	-0.00222351		2383.58	-0.01107023		2913.58	-0.00251169		3443.57	-0.00064752		3973.57	-0.00631508
263.8	-0.0099628		793.79	0.00148059		1323.79	0.00233988		1853.79	-0.00164259		2383.78	-0.01154147		2913.78	-0.00339677		3443.77	-0.00001487		3973.77	-0.0074563
264	-0.01056115		793.99	0.0016154		1323.99	0.00257623		1853.99	-0.00115987		2383.98	-0.01179529		2913.98	-0.00370498		3443.97	0.00087713		3973.97	-0.00788046
264.2	-0.01021531		794.19	0.00212898		1324.19	0.00182132		1854.19	-0.00169488		2384.18	-0.01104985		2914.18	-0.00485654		3444.17	0.00148027		3974.17	-0.00820524
264.4	-0.01087649		794.39	0.00289339		1324.39	0.00171607		1854.39	-0.00269609		2384.38	-0.01106195		2914.38	-0.00471547		3444.37	0.00250563		3974.37	-0.00731722
264.6	-0.01191186		794.59	0.00274063		1324.59	0.00207361		1854.59	-0.00217846		2384.58	-0.01100817		2914.58	-0.00527346		3444.57	0.00242027		3974.57	-0.00656283
264.8	-0.01233344		794.79	0.00185413		1324.79	0.00189457		1854.79	-0.00127401		2384.78	-0.01170396		2914.78	-0.0058009		3444.77	0.0021413		3974.77	-0.00585473
265	-0.01169331		794.99	0.00192751		1324.99	0.00241915		1854.99	0.0001213		2384.98	-0.01179291		2914.98	-0.00598162		3444.97	0.00182145		3974.97	-0.00567982
265.2	-0.01088468		795.19	0.00133211		1325.19	0.00233453		1855.19	0.00063337		2385.18	-0.01126049		2915.18	-0.00615394		3445.17	0.00258005		3975.17	-0.00564861
265.4	-0.0105652		795.39	0.00101325		1325.39	0.00291137		1855.39	0.00065027		2385.38	-0.01122907		2915.38	-0.00591709		3445.37	0.00313795		3975.37	-0.00516374
265.6	-0.01128071		795.59	0.00098237		1325.59	0.00345826		1855.59	0.00002834		2385.58	-0.01207969		2915.58	-0.00594774		3445.57	0.00234115		3975.57	-0.00485598
265.8	-0.01094565		795.79	0.00129807		1325.79	0.00321603		1855.79	-0.00124831		2385.78	-0.01229418		2915.78	-0.00536905		3445.77	0.00187524		3975.77	-0.00394389
266	-0.01031722		795.99	0.00175782		1325.99	0.00368804		1855.99	-0.00055841		2385.98	-0.01230964		2915.98	-0.00473454		3445.97	0.00205602		3975.97	-0.00318315
266.2	-0.00907116		796.19	0.00172934		1326.19	0.00322035		1856.19	-0.00107423		2386.18	-0.0120589		2916.18	-0.00424727		3446.17	0.00200582		3976.17	-0.00279069
266.4	-0.00934589		796.39	0.00226678		1326.39	0.00405097		1856.39	-0.0005513		2386.38	-0.01206101		2916.38	-0.00374746		3446.37	0.00241428		3976.37	-0.00219435
266.6	-0.00855549		796.59	0.00226683		1326.59	0.00381145		1856.59	-0.0008129		2386.58	-0.01266714		2916.58	-0.00371191		3446.57	0.00210829		3976.57	-0.002311
266.8	-0.00847456		796.79	0.00273594		1326.79	0.00386645		1856.79	-0.0005805		2386.78	-0.01178848		2916.78	-0.00357725		3446.77	0.00201586		3976.77	-0.00184249
267	-0.00795518		796.99	0.00258143		1326.99	0.00360725		1856.99	-0.00046244		2386.98	-0.0121548		2916.98	-0.00351578		3446.97	0.00119497		3976.97	-0.00136949
267.2	-0.00806224		797.19	0.00137428		1327.19	0.00257357		1857.19	-0.00056631		2387.18	-0.01252419		2917.18	-0.0034881		3447.17	0.00145313		3977.17	-0.00144833
267.4	-0.00844819		797.39	0.00128082		1327.39	0.00214622		1857.39	-0.00037397		2387.38	-0.01164587		2917.38	-0.00362126		3447.37	0.00049644		3977.37	-0.00174014
267.6	-0.00843266		797.59	0.00159958		1327.59	0.00257248		1857.59	-0.00033465		2387.58	-0.01121777		2917.58	-0.003943		3447.57	0.00142297		3977.57	-0.00205603
267.8	-0.00820128		797.79	0.00198556		1327.79	0.00328216		1857.79	0.00088526		2387.78	-0.01159659		2917.78	-0.0036708		3447.77	0.00202414		3977.77	-0.00189188
268	-0.00858942		797.99	0.00278101		1327.99	0.00347802		1857.99	0.00063372		2387.98	-0.01107201		2917.98	-0.00376195		3447.97	0.00262139		3977.97	-0.00199724
268.2	-0.007602		798.19	0.00389507		1328.19	0.00368243		1858.19	-0.0001177		2388.18	-0.01035814		2918.18	-0.00464813		3448.17	0.00216692		3978.17	-0.00215924
268.4	-0.00713521		798.39	0.00417625		1328.39	0.00394923		1858.39	-0.00038257		2388.38	-0.00986526		2918.38	-0.00419322		3448.37	0.00205362		3978.37	-0.0022327
268.6	-0.00805951		798.59	0.00379231		1328.59	0.00419136		1858.59	0.00064232		2388.58	-0.00959831		2918.58	-0.00421294		3448.57	0.0014621		3978.57	-0.00254635
268.8	-0.00777018		798.79	0.00312012		1328.79	0.0041052		1858.79	0.00078523		2388.78	-0.00973547		2918.78	-0.00382106		3448.77	0.00159597		3978.77	-0.00356612
269	-0.00810995		798.99	0.00308497		1328.99	0.00435733		1858.99	0.00127146		2388.98	-0.00896076		2918.98	-0.00376992		3448.97	0.00199491		3978.97	-0.00404085
269.2	-0.00844412		799.19	0.00348298		1329.19	0.0042105		1859.19	0.00015299		2389.18	-0.00913269		2919.18	-0.00352978		3449.17	0.00273069		3979.17	-0.00391505
269.4	-0.00903978		799.39	0.00407496		1329.39	0.0043606		1859.39	0.00071324		2389.38	-0.01003122		2919.38	-0.00270723		3449.37	0.00243994		3979.37	-0.0038803
269.6	-0.01012435		799.59	0.00387352		1329.59	0.00441331		1859.59	0.00003201		2389.58	-0.01079428		2919.58	-0.00299772		3449.57	0.00198695		3979.57	-0.00473905
269.8	-0.01014269		799.79	0.00461188		1329.79	0.00431043		1859.79	-0.00056652		2389.78	-0.01111415		2919.78	-0.00271655		3449.77	0.00257571		3979.77	-0.00454596
270	-0.01000562		799.99	0.00445986		1329.99	0.00439441		1859.99	-0.00095065		2389.98	-0.01110714		2919.98	-0.00294867		3449.97	0.00295326		3979.97	-0.00457885
270.2	-0.0102513		800.19	0.00340942		1330.19	0.00418321		1860.19	-0.00136494		2390.18	-0.01082066		2920.18	-0.00239817		3450.17	0.00303766		3980.17	-0.00550314
270.4	-0.01143206		800.39	0.00309824		1330.39	0.00438628		1860.39	-0.00176668		2390.38	-0.01093856		2920.38	-0.00286771		3450.37	0.00305247		3980.37	-0.00479963
270.6	-0.01142015		800.59	0.00321175		1330.59	0.00394761		1860.59	-0.00152258		2390.58	-0.01097273		2920.58	-0.00251233		3450.57	0.00166296		3980.57	-0.00509747
270.8	-0.0126508		800.79	0.00333711		1330.79	0.0030826		1860.79	-0.00174699		2390.78	-0.01048918		2920.78	-0.00187356		3450.77	0.00168512		3980.77	-0.00529709
271	-0.01326817		800.99	0.00338695		1330.99	0.00243596		1860.99	-0.001847		2390.98	-0.01063038		2920.98	-0.00188694		3450.97	0.0011247		3980.97	-0.00526182
271.2	-0.01371591		801.19	0.0029028		1331.19	0.00220213		1861.19	-0.00187402		2391.18	-0.01035733		2921.18	-0.0010713		3451.17	0.00160539		3981.17	-0.00560143
271.4	-0.01409063		801.39	0.00293308		1331.39	0.00218957		1861.39	-0.00157207		2391.38	-0.00998091		2921.38	-0.0011099		3451.37	0.00066022		3981.37	-0.00583595
271.6	-0.01362313		801.59	0.0029844		1331.59	0.00308782		1861.59	-0.00111122		2391.58	-0.00989377		2921.58	-0.00113401		3451.57	0.00112808		3981.57	-0.00540694
271.8	-0.01258621		801.79	0.00372082		1331.79	0.00344922		1861.79	-0.00036816		2391.78	-0.01074639		2921.78	-0.00048181		3451.77	0.00148767		3981.77	-0.00541423
272	-0.01241355		801.99	0.00414574		1331.99	0.00268786		1861.99	-0.00164941		2391.98	-0.01083529		2921.98	-0.00080673		3451.97	0.00108749		3981.97	-0.00573256
272.2	-0.01143223		802.19	0.00452982		1332.19	0.00270617		1862.19	-0.00256098		2392.18	-0.01114213		2922.18	-0.00141859		3452.17	0.00006207		3982.17	-0.00561466
272.4	-0.01185869		802.39	0.00496909		1332.39	0.0034658		1862.39	-0.00178835		2392.38	-0.01119433		2922.38	-0.00041006		3452.37	-0.00042437		3982.37	-0.00614583
272.6	-0.01244379		802.59	0.00472058		1332.59	0.00324291		1862.59	-0.00209708		2392.58	-0.01181821		2922.58	-0.00111295		3452.57	-0.00128809		3982.57	-0.006411
272.8	-0.01312921		802.79	0.00486558		1332.79	0.0032927		1862.79	-0.00193675		2392.78	-0.01233444		2922.78	-0.00148915		3452.77	-0.00157486		3982.77	-0.00725785
273	-0.01303081		802.99	0.00550669		1332.99	0.00317205		1862.99	-0.00196592		2392.98	-0.01252128		2922.98	-0.00146018		3452.97	-0.00112809		3982.97	-0.0071591
273.2	-0.01217117		803.19	0.0061495		1333.19	0.0033529		1863.19	-0.00159697		2393.18	-0.01310687		2923.18	-0.00091591		3453.17	-0.00138733		3983.17	-0.00743832
273.4	-0.01243057		803.39	0.00587178		1333.39	0.00329482		1863.39	-0.00086077		2393.38	-0.0133935		2923.38	-0.0014615		3453.37	-0.00141337		3983.37	-0.00757545
273.6	-0.01211791		803.59	0.00560094		1333.59	0.00343785		1863.59	-0.00103106		2393.58	-0.01393921		2923.58	-0.00171653		3453.57	-0.0012358		3983.57	-0.00793113
273.8	-0.01235195		803.79	0.00583466		1333.79	0.0031371		1863.79	-0.00153731		2393.78	-0.01381173		2923.78	-0.00189714		3453.77	-0.00117548		3983.77	-0.00766789
274	-0.01231892		803.99	0.00502061		1333.99	0.00361183		1863.99	-0.00128209		2393.98	-0.0133695		2923.98	-0.001485		3453.97	-0.00108151		3983.97	-0.00776262
274.2	-0.01230069		804.19	0.00442191		1334.19	0.0044696		1864.19	-0.0005881		2394.18	-0.01381491		2924.18	-0.00066549		3454.17	-0.00081325		3984.17	-0.00802727
274.4	-0.01200873		804.39	0.00406178		1334.39	0.00472631		1864.39	-0.00049124		2394.38	-0.01432722		2924.38	-0.00028838		3454.37	-0.00045697		3984.37	-0.00721879
274.6	-0.0117701		804.59	0.00456836		1334.59	0.00531583		1864.59	0.00076154		2394.58	-0.01374385		2924.58	0.0008412		3454.57	-0.00055435		3984.57	-0.00716191
274.8	-0.01180913		804.79	0.00463017		1334.79	0.00624042		1864.79	0.00080638		2394.78	-0.01396916		2924.78	0.00081995		3454.77	-0.00011926		3984.77	-0.00832091
275	-0.01157912		804.99	0.00424322		1334.99	0.0061976		1864.99	0.00084407		2394.98	-0.01358447		2924.98	0.00025812		3454.97	-0.00050009		3984.97	-0.00789017
275.2	-0.01171384		805.19	0.00372345		1335.19	0.00609215		1865.19	0.00066035		2395.18	-0.0128638		2925.18	0.00005615		3455.17	-0.00055812		3985.17	-0.00773148
275.4	-0.01139331		805.39	0.00271824		1335.39	0.00606519		1865.39	0.00140356		2395.38	-0.01261757		2925.38	-0.00075643		3455.37	-0.00075505		3985.37	-0.00688118
275.6	-0.01094546		805.59	0.00300796		1335.59	0.00682623		1865.59	0.00147654		2395.58	-0.0122861		2925.58	-0.00130788		3455.57	-0.00010956		3985.57	-0.00665907
275.8	-0.01071271		805.79	0.00298556		1335.79	0.00606755		1865.79	0.0012773		2395.78	-0.01213484		2925.78	-0.00153637		3455.77	0.00102062		3985.77	-0.00696977
276	-0.01114904		805.99	0.00258154		1335.99	0.00490858		1865.99	0.00068176		2395.98	-0.01268674		2925.98	-0.00192261		3455.97	0.0010319		3985.97	-0.00632219
276.2	-0.01107878		806.19	0.00265561		1336.19	0.00526009		1866.19	0.00061526		2396.18	-0.01190136		2926.18	-0.00250202		3456.17	0.00105518		3986.17	-0.00617474
276.4	-0.01184857		806.39	0.00212221		1336.39	0.00533387		1866.39	0.00073925		2396.38	-0.01163143		2926.38	-0.00247414		3456.37	0.00187569		3986.37	-0.00632482
276.6	-0.01154014		806.59	0.00131485		1336.59	0.00479173		1866.59	-0.00028787		2396.58	-0.01219098		2926.58	-0.00408364		3456.57	0.00115177		3986.57	-0.00575236
276.8	-0.01210761		806.79	0.00119277		1336.79	0.00440173		1866.79	-0.00044014		2396.78	-0.01168109		2926.78	-0.00354965		3456.77	0.00136868		3986.77	-0.00654139
277	-0.01117996		806.99	0.00088254		1336.99	0.00387024		1866.99	-0.00053185		2396.98	-0.01053217		2926.98	-0.00308536		3456.97	0.00216245		3986.97	-0.00652608
277.2	-0.01181098		807.19	0.00033135		1337.19	0.00334499		1867.19	-0.00092792		2397.18	-0.01079316		2927.18	-0.00248085		3457.17	0.00223689		3987.17	-0.00632183
277.4	-0.01243987		807.39	-0.00012005		1337.39	0.00213599		1867.39	-0.00116713		2397.38	-0.01054097		2927.38	-0.00272163		3457.37	0.00229683		3987.37	-0.00601652
277.6	-0.01264315		807.59	0.00067654		1337.59	0.00189808		1867.59	-0.0009767		2397.58	-0.0104309		2927.58	-0.00201353		3457.57	0.0030639		3987.57	-0.00661372
277.8	-0.01311374		807.79	0.00102379		1337.79	0.00177746		1867.79	-0.00123371		2397.78	-0.00992699		2927.78	-0.00196337		3457.77	0.00316806		3987.77	-0.00635361
278	-0.01347108		807.99	0.0012187		1337.99	0.00268918		1867.99	-0.00149089		2397.98	-0.01046341		2927.98	-0.00100618		3457.97	0.00348649		3987.97	-0.00596201
278.2	-0.01361244		808.19	0.00076859		1338.19	0.00273598		1868.19	-0.00146995		2398.18	-0.01124964		2928.18	-0.00052181		3458.17	0.00280459		3988.17	-0.00617836
278.4	-0.01334862		808.39	0.0005725		1338.39	0.00268948		1868.39	-0.00148135		2398.38	-0.01130081		2928.38	0.00013765		3458.37	0.00257296		3988.37	-0.00590699
278.6	-0.01339288		808.59	0.00098688		1338.59	0.00208401		1868.59	-0.00091532		2398.58	-0.0104215		2928.58	0.00078759		3458.57	0.00198154		3988.57	-0.00619395
278.8	-0.01382364		808.79	0.00168738		1338.79	0.0012947		1868.79	-0.00143285		2398.78	-0.01089612		2928.78	0.00026123		3458.77	0.0012581		3988.77	-0.00635012
279	-0.01374337		808.99	0.00096923		1338.99	0.00038087		1868.99	-0.00233479		2398.98	-0.01034396		2928.98	0.00005192		3458.97	0.00120638		3988.97	-0.0058331
279.2	-0.01393716		809.19	0.00117417		1339.19	0.00003699		1869.19	-0.00229019		2399.18	-0.00983283		2929.18	-0.00003483		3459.17	0.0015119		3989.17	-0.00647196
279.4	-0.01385891		809.39	0.00121556		1339.39	-0.0000978		1869.39	-0.00123661		2399.38	-0.01009744		2929.38	0.00046043		3459.37	0.00176089		3989.37	-0.00608353
279.6	-0.01350691		809.59	0.00185776		1339.59	0.00013038		1869.59	-0.00050154		2399.58	-0.0103353		2929.58	-0.00028868		3459.57	0.00182828		3989.57	-0.00686995
279.8	-0.01314211		809.79	0.00142449		1339.79	-0.00029526		1869.79	-0.00070245		2399.78	-0.01065017		2929.78	0.00042316		3459.77	0.00247337		3989.77	-0.0064298
280	-0.01279689		809.99	0.00160091		1339.99	0.00012336		1869.99	0.00010941		2399.98	-0.01126048		2929.98	0.00122827		3459.97	0.00159208		3989.97	-0.00621893
280.2	-0.01264023		810.19	0.0015135		1340.19	0.00074406		1870.19	0.00111571		2400.18	-0.01070548		2930.18	0.00064181		3460.17	0.0013431		3990.17	-0.00676331
280.4	-0.01285929		810.39	0.00082085		1340.39	0.00152042		1870.39	0.00164939		2400.38	-0.01089197		2930.38	0.00070901		3460.37	0.0013603		3990.37	-0.00612229
280.6	-0.01251236		810.59	0.00129712		1340.59	0.00206088		1870.59	0.00116552		2400.58	-0.01152998		2930.58	-0.00014415		3460.57	0.00030938		3990.57	-0.0059437
280.8	-0.01313469		810.79	0.0021871		1340.79	0.00158622		1870.79	0.00172052		2400.78	-0.01148314		2930.78	0.00023481		3460.77	0.00103543		3990.77	-0.00616742
281	-0.01273325		810.99	0.00282836		1340.99	0.00229343		1870.99	0.00193534		2400.98	-0.01116418		2930.98	0.00035582		3460.97	0.00085537		3990.97	-0.00645491
281.2	-0.01337849		811.19	0.00330717		1341.19	0.00228355		1871.19	0.00158417		2401.18	-0.0115855		2931.18	0.00090683		3461.17	0.00051065		3991.17	-0.00649039
281.4	-0.01254312		811.39	0.00310218		1341.39	0.00251045		1871.39	0.00138789		2401.38	-0.01147935		2931.38	0.00068469		3461.37	0.00077206		3991.37	-0.0064527
281.6	-0.01190681		811.59	0.00295898		1341.59	0.00346902		1871.59	0.00199668		2401.58	-0.01240657		2931.58	0.00012897		3461.57	0.00118265		3991.57	-0.00663696
281.8	-0.01185515		811.79	0.00214419		1341.79	0.00368315		1871.79	0.00133006		2401.78	-0.01185071		2931.78	-0.00027752		3461.77	0.00122555		3991.77	-0.00585383
282	-0.01223849		811.99	0.00214424		1341.99	0.00379016		1871.99	0.00058088		2401.98	-0.0119782		2931.98	0.0000501		3461.97	0.00119388		3991.97	-0.00581125
282.2	-0.01199464		812.19	0.00112796		1342.19	0.00274926		1872.19	0.00077816		2402.18	-0.01175771		2932.18	-0.00026343		3462.17	0.0013942		3992.17	-0.00665795
282.4	-0.01155751		812.39	0.00175959		1342.39	0.00250917		1872.39	0.00085315		2402.38	-0.01135129		2932.38	-0.00078167		3462.37	0.00225402		3992.37	-0.00655685
282.6	-0.01202718		812.59	0.00184408		1342.59	0.00171061		1872.59	0.00026049		2402.58	-0.01100792		2932.58	-0.00135582		3462.57	0.00365012		3992.57	-0.00658758
282.8	-0.01178718		812.79	0.00196848		1342.79	0.00089763		1872.79	-0.00009194		2402.78	-0.01185827		2932.78	-0.00189612		3462.77	0.00392637		3992.77	-0.00581639
283	-0.01148114		812.99	0.00129686		1342.99	0.00051579		1872.99	-0.00087847		2402.98	-0.01180825		2932.98	-0.00158255		3462.97	0.00526293		3992.97	-0.00591241
283.2	-0.01190593		813.19	0.00138818		1343.19	0.00029757		1873.19	-0.00138094		2403.18	-0.01100739		2933.18	-0.00145017		3463.17	0.00557542		3993.17	-0.00574072
283.4	-0.01172051		813.39	0.0014955		1343.39	-0.00054457		1873.39	-0.00126775		2403.38	-0.01080991		2933.38	-0.00157799		3463.37	0.00560289		3993.37	-0.00440619
283.6	-0.0105545		813.59	0.00113303		1343.59	-0.000824		1873.59	-0.00141523		2403.58	-0.01115933		2933.58	-0.00206617		3463.57	0.00547897		3993.57	-0.00442858
283.8	-0.01007187		813.79	0.00088172		1343.79	-0.00147261		1873.79	-0.00208887		2403.78	-0.01116049		2933.78	-0.00123562		3463.77	0.00459444		3993.77	-0.00425978
284	-0.00997752		813.99	0.00127578		1343.99	-0.00160544		1873.99	-0.00086382		2403.98	-0.0107086		2933.98	-0.00252067		3463.97	0.00366074		3993.97	-0.00429192
284.2	-0.01046006		814.19	0.00164291		1344.19	-0.0010454		1874.19	-0.00042981		2404.18	-0.01029182		2934.18	-0.00336601		3464.17	0.0037286		3994.17	-0.00465381
284.4	-0.01083937		814.39	0.00214063		1344.39	-0.0006698		1874.39	-0.00036494		2404.38	-0.01021363		2934.38	-0.00364675		3464.37	0.0035611		3994.37	-0.00383076
284.6	-0.01072902		814.59	0.00258701		1344.59	-0.0006645		1874.59	-0.00102131		2404.58	-0.01063791		2934.58	-0.00376586		3464.57	0.00316244		3994.57	-0.00495212
284.8	-0.01153904		814.79	0.00307234		1344.79	-0.00070755		1874.79	-0.00058006		2404.78	-0.01036097		2934.78	-0.00312447		3464.77	0.00276588		3994.77	-0.00533137
285	-0.01134064		814.99	0.00182293		1344.99	0.00021836		1874.99	-0.00012225		2404.98	-0.01017494		2934.98	-0.00243667		3464.97	0.00127575		3994.97	-0.00631438
285.2	-0.01186534		815.19	0.0018099		1345.19	-0.00010955		1875.19	-0.0003693		2405.18	-0.01010749		2935.18	-0.00114177		3465.17	0.00047913		3995.17	-0.00654693
285.4	-0.01129521		815.39	0.00111858		1345.39	-0.00016831		1875.39	-0.00104989		2405.38	-0.00965458		2935.38	-0.00128049		3465.37	0.00037433		3995.37	-0.00733631
285.6	-0.01195466		815.59	0.00034635		1345.59	0.00009336		1875.59	-0.00092075		2405.58	-0.01006227		2935.58	-0.00139794		3465.57	-0.00065931		3995.57	-0.00818763
285.8	-0.01313355		815.79	-0.00035408		1345.79	-0.00056161		1875.79	-0.0016995		2405.78	-0.00954767		2935.78	-0.00062428		3465.77	-0.00082873		3995.77	-0.00905877
286	-0.01330944		815.99	0.00032158		1345.99	0.00040468		1875.99	-0.00104456		2405.98	-0.01087362		2935.98	-0.00018324		3465.97	-0.00160033		3995.97	-0.00962064
286.2	-0.01341606		816.19	-0.00011983		1346.19	0.00105455		1876.19	-0.00034019		2406.18	-0.01155348		2936.18	-0.00047987		3466.17	-0.00180263		3996.17	-0.01024003
286.4	-0.0134414		816.39	0.00100925		1346.39	0.00233506		1876.39	0.00015358		2406.38	-0.0110879		2936.38	-0.00055325		3466.37	-0.00169773		3996.37	-0.00981432
286.6	-0.01268498		816.59	0.00081945		1346.59	0.00280669		1876.59	-0.00040927		2406.58	-0.01095695		2936.58	-0.00033141		3466.57	-0.00117409		3996.57	-0.00940473
286.8	-0.01245047		816.79	0.00143958		1346.79	0.0032504		1876.79	0.00004801		2406.78	-0.010492		2936.78	0.00046846		3466.77	-0.00153811		3996.77	-0.00902088
287	-0.01314472		816.99	0.00205812		1346.99	0.00340446		1876.99	-0.00033372		2406.98	-0.00976877		2936.98	-0.00005472		3466.97	-0.00058572		3996.97	-0.00922549
287.2	-0.0127726		817.19	0.00200509		1347.19	0.00440534		1877.19	-0.00139819		2407.18	-0.00946061		2937.18	-0.00150163		3467.17	-0.00057293		3997.17	-0.00861725
287.4	-0.01222128		817.39	0.00240942		1347.39	0.00466694		1877.39	-0.00114811		2407.38	-0.00906308		2937.38	-0.00221849		3467.37	-0.00053157		3997.37	-0.00882541
287.6	-0.01154091		817.59	0.00148237		1347.59	0.00461627		1877.59	-0.00094278		2407.58	-0.00977611		2937.58	-0.00296817		3467.57	-0.00064394		3997.57	-0.00889406
287.8	-0.01141562		817.79	0.00140786		1347.79	0.00418165		1877.79	-0.00093026		2407.78	-0.00947613		2937.78	-0.00254236		3467.77	-0.00021096		3997.77	-0.00908259
288	-0.01052706		817.99	0.00136055		1347.99	0.00461473		1877.99	-0.00030269		2407.98	-0.00854336		2937.98	-0.00370829		3467.97	0.00033318		3997.97	-0.0087417
288.2	-0.01066833		818.19	0.00127025		1348.19	0.00514916		1878.19	-0.00026732		2408.18	-0.00815324		2938.18	-0.00365302		3468.17	0.00071303		3998.17	-0.00879896
288.4	-0.01040803		818.39	0.00186898		1348.39	0.00432195		1878.39	-0.00107248		2408.38	-0.00877126		2938.38	-0.00331985		3468.37	0.00124269		3998.37	-0.00831624
288.6	-0.00930479		818.59	0.00154179		1348.59	0.00438767		1878.59	-0.00128999		2408.58	-0.0082203		2938.58	-0.00265031		3468.57	0.00187303		3998.57	-0.0091411
288.8	-0.00963954		818.79	0.00225385		1348.79	0.00377415		1878.79	-0.0014256		2408.78	-0.00860923		2938.78	-0.00202685		3468.77	0.00196762		3998.77	-0.00867216
289	-0.00936466		818.99	0.00108634		1348.99	0.00384864		1878.99	-0.001728		2408.98	-0.00899442		2938.98	-0.00172754		3468.97	0.00182685		3998.97	-0.0090117
289.2	-0.00961644		819.19	0.00174848		1349.19	0.00288461		1879.19	-0.00264786		2409.18	-0.00920578		2939.18	-0.00101666		3469.17	0.00187176		3999.17	-0.00940219
289.4	-0.00915116		819.39	0.00123142		1349.39	0.00298417		1879.39	-0.00359781		2409.38	-0.00857816		2939.38	-0.00125408		3469.37	0.00173801		3999.37	-0.00987585
289.6	-0.0096532		819.59	0.00119719		1349.59	0.00295153		1879.59	-0.00331263		2409.58	-0.0092322		2939.58	-0.00081783		3469.57	0.00109504		3999.57	-0.00960379
289.8	-0.00985697		819.79	0.00130165		1349.79	0.00239228		1879.79	-0.00246946		2409.78	-0.00933514		2939.78	-0.00096562		3469.77	0.0011363		3999.77	-0.0088845
290	-0.01010658		819.99	0.00230229		1349.99	0.0033581		1879.99	-0.0020142		2409.98	-0.00965257		2939.98	-0.00128003		3469.97	0.00032431		3999.97	-0.00853863
290.2	-0.0106971		820.19	0.00248915		1350.19	0.00339438		1880.19	-0.0015339		2410.18	-0.00920647		2940.18	-0.00168476		3470.17	-0.0000331		4000.17	-0.0080952
290.4	-0.01160731		820.39	0.00324165		1350.39	0.00367012		1880.39	-0.00138373		2410.38	-0.00850692		2940.38	-0.0025944		3470.37	-0.00011571		4000.37	-0.00722566
290.6	-0.01231121		820.59	0.00339752		1350.59	0.0038978		1880.59	-0.00094381		2410.58	-0.00891942		2940.58	-0.00325523		3470.57	-0.0006719		4000.57	-0.00694046
290.8	-0.01292942		820.79	0.00346536		1350.79	0.00376309		1880.79	-0.00065111		2410.78	-0.00819974		2940.78	-0.00377551		3470.77	-0.00039555		4000.77	-0.00684079
291	-0.01362373		820.99	0.0026631		1350.99	0.00377078		1880.99	-0.00107784		2410.98	-0.00916521		2940.98	-0.00452481		3470.97	-0.000307		4000.97	-0.0067004
291.2	-0.0136376		821.19	0.00234276		1351.19	0.00400162		1881.19	-0.00153526		2411.18	-0.00981821		2941.18	-0.00491025		3471.17	-0.00037466		4001.17	-0.00593522
291.4	-0.01445249		821.39	0.00159777		1351.39	0.00336357		1881.39	-0.00130232		2411.38	-0.01024089		2941.38	-0.00404153		3471.37	-0.00063381		4001.37	-0.00663296
291.6	-0.01410861		821.59	0.00066322		1351.59	0.00187983		1881.59	-0.00106819		2411.58	-0.01019466		2941.58	-0.00365432		3471.57	-0.00074779		4001.57	-0.00582517
291.8	-0.01407559		821.79	0.00046973		1351.79	0.00155099		1881.79	-0.00096182		2411.78	-0.00945893		2941.78	-0.00256511		3471.77	-0.00031983		4001.77	-0.00546535
292	-0.01350418		821.99	0.00104611		1351.99	0.00175755		1881.99	-0.00003003		2411.98	-0.00889079		2941.98	-0.00303748		3471.97	-0.00042637		4001.97	-0.00477757
292.2	-0.01355047		822.19	0.00136037		1352.19	0.00219384		1882.19	-0.00029015		2412.18	-0.00891427		2942.18	-0.00339599		3472.17	-0.0001744		4002.17	-0.00484475
292.4	-0.01280601		822.39	0.00145328		1352.39	0.00259328		1882.39	0.00012734		2412.38	-0.00951209		2942.38	-0.00272456		3472.37	0.00063978		4002.37	-0.00488481
292.6	-0.01165154		822.59	0.00052545		1352.59	0.00294787		1882.59	0.00045226		2412.58	-0.00895612		2942.58	-0.00254139		3472.57	0.00125149		4002.57	-0.00501353
292.8	-0.01167456		822.79	0.00019311		1352.79	0.00307705		1882.79	0.00022663		2412.78	-0.00982668		2942.78	-0.0020886		3472.77	0.0019563		4002.77	-0.00520428
293	-0.01179255		822.99	-0.00085661		1352.99	0.00366595		1882.99	0.00003269		2412.98	-0.00992649		2942.98	-0.00180082		3472.97	0.0020287		4002.97	-0.00560541
293.2	-0.01178077		823.19	-0.00063352		1353.19	0.00308424		1883.19	0.00003252		2413.18	-0.00914524		2943.18	-0.00170695		3473.17	0.00225774		4003.17	-0.00569305
293.4	-0.01183375		823.39	-0.00041544		1353.39	0.00395293		1883.39	0.00036606		2413.38	-0.00821819		2943.38	-0.00103236		3473.37	0.00213173		4003.37	-0.00618435
293.6	-0.01223217		823.59	-0.00065022		1353.59	0.0030046		1883.59	0.00051424		2413.58	-0.0074628		2943.58	-0.00093823		3473.57	0.00159722		4003.57	-0.00622391
293.8	-0.01290866		823.79	-0.00087308		1353.79	0.00265767		1883.79	0.00001334		2413.78	-0.00688709		2943.78	-0.00111156		3473.77	0.00199647		4003.77	-0.00600123
294	-0.0131705		823.99	-0.00046358		1353.99	0.00328816		1883.99	-0.00004075		2413.98	-0.00687618		2943.98	-0.00140418		3473.97	0.00179346		4003.97	-0.00659515
294.2	-0.0136667		824.19	-0.0007231		1354.19	0.00325657		1884.19	0.00046472		2414.18	-0.0065328		2944.18	-0.00132262		3474.17	0.00235963		4004.17	-0.00601701
294.4	-0.01453547		824.39	0.00009518		1354.39	0.00277403		1884.39	0.00078673		2414.38	-0.00594633		2944.38	-0.00158668		3474.37	0.0026165		4004.37	-0.00548605
294.6	-0.01457961		824.59	0.00066278		1354.59	0.00298981		1884.59	0.0015347		2414.58	-0.00697695		2944.58	-0.00104135		3474.57	0.00195603		4004.57	-0.00565409
294.8	-0.01426563		824.79	0.00010701		1354.79	0.00217361		1884.79	0.00066414		2414.78	-0.00837512		2944.78	-0.00068287		3474.77	0.00231126		4004.77	-0.00533995
295	-0.01453033		824.99	0.00068017		1354.99	0.00197223		1884.99	0.00010292		2414.98	-0.01011257		2944.98	0.00000176		3474.97	0.00178612		4004.97	-0.00595006
295.2	-0.01440184		825.19	0.00191843		1355.19	0.00197915		1885.19	-0.00007142		2415.18	-0.01074128		2945.18	0.00024425		3475.17	0.00218523		4005.17	-0.00675422
295.4	-0.01405851		825.39	0.00242935		1355.39	0.00133542		1885.39	-0.00050819		2415.38	-0.01110581		2945.38	0.00056684		3475.37	0.00174986		4005.37	-0.00751694
295.6	-0.01354638		825.59	0.00275017		1355.59	0.00118695		1885.59	0.00039763		2415.58	-0.0111567		2945.58	0.00063354		3475.57	0.00243881		4005.57	-0.00707949
295.8	-0.01274543		825.79	0.00358262		1355.79	0.00200097		1885.79	0.00053142		2415.78	-0.01163852		2945.78	0.00061256		3475.77	0.00291346		4005.77	-0.00684461
296	-0.01230626		825.99	0.00431545		1355.99	0.00244686		1885.99	0.00103278		2415.98	-0.01198969		2945.98	-0.00004222		3475.97	0.00347543		4005.97	-0.00695055
296.2	-0.01234286		826.19	0.0047982		1356.19	0.00260771		1886.19	0.00038204		2416.18	-0.01218088		2946.18	-0.00076639		3476.17	0.00347344		4006.17	-0.00698219
296.4	-0.01135814		826.39	0.00486743		1356.39	0.00339948		1886.39	0.00089526		2416.38	-0.01304985		2946.38	-0.00058436		3476.37	0.00364922		4006.37	-0.00658705
296.6	-0.0109274		826.59	0.00473088		1356.59	0.00327731		1886.59	0.0003351		2416.58	-0.01328936		2946.58	-0.00046959		3476.57	0.00349191		4006.57	-0.00596285
296.8	-0.01068702		826.79	0.00483978		1356.79	0.00364451		1886.79	0.00014385		2416.78	-0.01386624		2946.78	-0.00059739		3476.77	0.00330598		4006.77	-0.00558591
297	-0.01045037		826.99	0.00537904		1356.99	0.00345304		1886.99	0.00001491		2416.98	-0.01354881		2946.98	-0.00116279		3476.97	0.00306479		4006.97	-0.00527635
297.2	-0.00990327		827.19	0.00509017		1357.19	0.0032931		1887.19	0.00079553		2417.18	-0.01244247		2947.18	-0.00136425		3477.17	0.00313601		4007.17	-0.00486247
297.4	-0.01006702		827.39	0.00460238		1357.39	0.00396339		1887.39	-0.00001155		2417.38	-0.01156825		2947.38	-0.00150485		3477.37	0.00215809		4007.37	-0.00421741
297.6	-0.00985207		827.59	0.00399278		1357.59	0.00388042		1887.59	-0.00033241		2417.58	-0.01094964		2947.58	-0.002987		3477.57	0.00182238		4007.57	-0.00408887
297.8	-0.01043445		827.79	0.00398591		1357.79	0.00499216		1887.79	-0.00013614		2417.78	-0.01114168		2947.78	-0.0033612		3477.77	0.00195214		4007.77	-0.00357493
298	-0.01042697		827.99	0.00318094		1357.99	0.00521689		1887.99	0.00038792		2417.98	-0.01091596		2947.98	-0.00328864		3477.97	0.00185664		4007.97	-0.00320656
298.2	-0.01179117		828.19	0.0024356		1358.19	0.00513671		1888.19	0.00048258		2418.18	-0.00997773		2948.18	-0.00268195		3478.17	0.0020568		4008.17	-0.00270743
298.4	-0.01215916		828.39	0.00297393		1358.39	0.00555611		1888.39	0.00067376		2418.38	-0.00956325		2948.38	-0.00301767		3478.37	0.00172142		4008.37	-0.00192489
298.6	-0.01252176		828.59	0.0031123		1358.59	0.00697359		1888.59	0.00026281		2418.58	-0.01059556		2948.58	-0.00317903		3478.57	0.00141051		4008.57	-0.00219977
298.8	-0.01273252		828.79	0.00228531		1358.79	0.00735436		1888.79	-0.00063047		2418.78	-0.01144372		2948.78	-0.00330514		3478.77	0.00150625		4008.77	-0.0030003
299	-0.01185706		828.99	0.00263019		1358.99	0.00739673		1888.99	0.0000746		2418.98	-0.01098505		2948.98	-0.00336713		3478.97	0.00130374		4008.97	-0.00423013
299.2	-0.01143477		829.19	0.00202649		1359.19	0.00650905		1889.19	-0.0002662		2419.18	-0.01065938		2949.18	-0.00281717		3479.17	0.00159831		4009.17	-0.00555979
299.4	-0.01177878		829.39	0.00106578		1359.39	0.0052124		1889.39	0.0001723		2419.38	-0.01088748		2949.38	-0.00275437		3479.37	0.00194408		4009.37	-0.00649368
299.6	-0.01238923		829.59	0.00084302		1359.59	0.0052001		1889.59	0.00024631		2419.58	-0.0111872		2949.58	-0.0022725		3479.57	0.00236427		4009.57	-0.00686164
299.8	-0.01240096		829.79	0.00042008		1359.79	0.00514634		1889.79	-0.00078583		2419.78	-0.01127806		2949.78	-0.00214498		3479.77	0.00218584		4009.77	-0.00698786
300	-0.01312469		829.99	-0.00015228		1359.99	0.00420512		1889.99	-0.00101671		2419.98	-0.01039155		2949.98	-0.00143521		3479.97	0.00141353		4009.97	-0.00701815
300.2	-0.01365781		830.19	0.00028391		1360.19	0.00402667		1890.19	-0.00179228		2420.18	-0.00979725		2950.18	-0.00113739		3480.17	0.00089999		4010.17	-0.00661288
300.4	-0.01275879		830.39	0.00041441		1360.39	0.00510848		1890.39	-0.00153163		2420.38	-0.00960916		2950.38	-0.00038128		3480.37	0.00079571		4010.37	-0.006797
300.6	-0.0117727		830.59	0.00090892		1360.59	0.00443306		1890.59	-0.00171099		2420.58	-0.00876085		2950.58	-0.0000963		3480.57	0.00046673		4010.57	-0.00652759
300.8	-0.01082671		830.79	0.00164485		1360.79	0.00392303		1890.79	-0.00155462		2420.78	-0.00769359		2950.78	0.00025213		3480.77	0.00024049		4010.77	-0.00632181
301	-0.01076978		830.99	0.00184233		1360.99	0.003204		1890.99	-0.00132602		2420.98	-0.00761434		2950.98	-0.00029431		3480.97	0.00083368		4010.97	-0.00680452
301.2	-0.01083866		831.19	0.00155323		1361.19	0.00361602		1891.19	-0.00131392		2421.18	-0.00776133		2951.18	0.00027654		3481.17	0.00048859		4011.17	-0.00662441
301.4	-0.01055727		831.39	0.00134159		1361.39	0.00367327		1891.39	-0.00290731		2421.38	-0.00728354		2951.38	0.00038785		3481.37	-0.00004121		4011.37	-0.00683272
301.6	-0.01031728		831.59	0.00201023		1361.59	0.00342598		1891.59	-0.00274309		2421.58	-0.00809128		2951.58	-0.00009907		3481.57	0.00007062		4011.57	-0.0068684
301.8	-0.01053683		831.79	0.00173536		1361.79	0.0034525		1891.79	-0.0026212		2421.78	-0.00687503		2951.78	0.00020937		3481.77	-0.00040718		4011.77	-0.0061417
302	-0.01022624		831.99	0.0019824		1361.99	0.00315637		1891.99	-0.00248789		2421.98	-0.00647811		2951.98	-0.00016673		3481.97	-0.00054065		4011.97	-0.00548015
302.2	-0.0100441		832.19	0.001973		1362.19	0.00364053		1892.19	-0.0026035		2422.18	-0.00603498		2952.18	-0.00054375		3482.17	-0.00051675		4012.17	-0.00563071
302.4	-0.00898464		832.39	0.00272082		1362.39	0.00372928		1892.39	-0.00202146		2422.38	-0.00596742		2952.38	-0.00133727		3482.37	-0.00028719		4012.37	-0.00540772
302.6	-0.00937171		832.59	0.00316886		1362.59	0.00346613		1892.59	-0.00167376		2422.58	-0.00618475		2952.58	-0.00190971		3482.57	0.00104802		4012.57	-0.00558418
302.8	-0.00948285		832.79	0.00249985		1362.79	0.00298079		1892.79	-0.00094868		2422.78	-0.00706076		2952.78	-0.00243936		3482.77	0.00117797		4012.77	-0.00586326
303	-0.00962932		832.99	0.00249847		1362.99	0.00174993		1892.99	0.00019037		2422.98	-0.00812039		2952.98	-0.00272906		3482.97	0.00166088		4012.97	-0.00529224
303.2	-0.01050379		833.19	0.00184429		1363.19	0.00099109		1893.19	0.00011381		2423.18	-0.00819573		2953.18	-0.00225622		3483.17	0.00233072		4013.17	-0.00460694
303.4	-0.01131971		833.39	0.00155727		1363.39	0.00239087		1893.39	0.00049757		2423.38	-0.0085029		2953.38	-0.0037519		3483.37	0.00277697		4013.37	-0.00436818
303.6	-0.01186556		833.59	0.0015069		1363.59	0.00292694		1893.59	-0.00019219		2423.58	-0.00931839		2953.58	-0.00380115		3483.57	0.002821		4013.57	-0.00376081
303.8	-0.01215933		833.79	0.00047317		1363.79	0.00326484		1893.79	-0.00053886		2423.78	-0.00941284		2953.78	-0.00419581		3483.77	0.00306751		4013.77	-0.00370271
304	-0.01254274		833.99	0.000759		1363.99	0.00312841		1893.99	0.00004488		2423.98	-0.00901497		2953.98	-0.00363739		3483.97	0.00196768		4013.97	-0.00371241
304.2	-0.01330365		834.19	0.00092576		1364.19	0.00371548		1894.19	-0.00080295		2424.18	-0.00964667		2954.18	-0.00424831		3484.17	0.00225907		4014.17	-0.00450163
304.4	-0.01327367		834.39	0.0012897		1364.39	0.00406705		1894.39	-0.00078679		2424.38	-0.00927462		2954.38	-0.00354483		3484.37	0.00285309		4014.37	-0.00493853
304.6	-0.0136089		834.59	0.00114747		1364.59	0.00433144		1894.59	-0.00122553		2424.58	-0.01032444		2954.58	-0.00400817		3484.57	0.00336439		4014.57	-0.00497295
304.8	-0.01415989		834.79	0.00057329		1364.79	0.00432281		1894.79	-0.00077326		2424.78	-0.01014628		2954.78	-0.00312746		3484.77	0.00349273		4014.77	-0.00507403
305	-0.01492753		834.99	-0.00035826		1364.99	0.00441984		1894.99	-0.00174619		2424.98	-0.01061201		2954.98	-0.00354974		3484.97	0.00383625		4014.97	-0.00583485
305.2	-0.0148022		835.19	-0.00124023		1365.19	0.00547024		1895.19	-0.00237707		2425.18	-0.01017254		2955.18	-0.00278499		3485.17	0.00352847		4015.17	-0.00589588
305.4	-0.01379061		835.39	-0.00099083		1365.39	0.00546355		1895.39	-0.00301377		2425.38	-0.00849856		2955.38	-0.00302345		3485.37	0.00334013		4015.37	-0.00611586
305.6	-0.01385261		835.59	-0.00033726		1365.59	0.00505615		1895.59	-0.00216663		2425.58	-0.00801651		2955.58	-0.00371882		3485.57	0.00303266		4015.57	-0.00564132
305.8	-0.01416787		835.79	-0.00091695		1365.79	0.00484321		1895.79	-0.00098316		2425.78	-0.0071771		2955.78	-0.00321148		3485.77	0.00218777		4015.77	-0.00537194
306	-0.01282973		835.99	-0.00094523		1365.99	0.00412744		1895.99	-0.00053113		2425.98	-0.00706598		2955.98	-0.00363676		3485.97	0.00173897		4015.97	-0.00562284
306.2	-0.01218193		836.19	-0.00114173		1366.19	0.00396528		1896.19	-0.00037048		2426.18	-0.0063181		2956.18	-0.00303727		3486.17	0.00177674		4016.17	-0.00606335
306.4	-0.01223272		836.39	-0.00063106		1366.39	0.0030424		1896.39	0.00030556		2426.38	-0.0066498		2956.38	-0.00311142		3486.37	0.00258018		4016.37	-0.0054643
306.6	-0.01237531		836.59	0.00001932		1366.59	0.00319878		1896.59	0.00119746		2426.58	-0.00698287		2956.58	-0.00313766		3486.57	0.00340285		4016.57	-0.00476569
306.8	-0.01249773		836.79	-0.00000761		1366.79	0.00347174		1896.79	0.00074237		2426.78	-0.00758971		2956.78	-0.00308182		3486.77	0.0033218		4016.77	-0.00393469
307	-0.01259799		836.99	-0.00002082		1366.99	0.00341007		1896.99	0.00070193		2426.98	-0.00832558		2956.98	-0.00261126		3486.97	0.003531		4016.97	-0.00315446
307.2	-0.01228013		837.19	0.00031847		1367.19	0.00351675		1897.19	0.00007217		2427.18	-0.00739479		2957.18	-0.00187088		3487.17	0.00287545		4017.17	-0.002865
307.4	-0.01169622		837.39	0.00006448		1367.39	0.00413766		1897.39	-0.00013404		2427.38	-0.00725642		2957.38	-0.00236177		3487.37	0.00210495		4017.37	-0.00330999
307.6	-0.01196669		837.59	0.00069419		1367.59	0.0029006		1897.59	-0.00021727		2427.58	-0.0082475		2957.58	-0.00216984		3487.57	0.00193933		4017.57	-0.00370872
307.8	-0.01170388		837.79	0.0005832		1367.79	0.00261976		1897.79	-0.00057884		2427.78	-0.00834282		2957.78	-0.00311917		3487.77	0.00117205		4017.77	-0.00410163
308	-0.01216312		837.99	0.00061975		1367.99	0.00215517		1897.99	-0.00015363		2427.98	-0.00936196		2957.98	-0.00249623		3487.97	0.00077813		4017.97	-0.00392187
308.2	-0.01306055		838.19	0.00051826		1368.19	0.00151791		1898.19	-0.00129167		2428.18	-0.01013701		2958.18	-0.00235166		3488.17	0.00146106		4018.17	-0.00451762
308.4	-0.01314223		838.39	0.00079877		1368.39	0.00170772		1898.39	-0.00203683		2428.38	-0.01033886		2958.38	-0.00146862		3488.37	0.00238256		4018.37	-0.0039302
308.6	-0.01311546		838.59	0.00099503		1368.59	0.0017877		1898.59	-0.00192577		2428.58	-0.01080139		2958.58	-0.00180642		3488.57	0.00241831		4018.57	-0.00349788
308.8	-0.01318856		838.79	0.00068193		1368.79	0.00091535		1898.79	-0.00136034		2428.78	-0.00997034		2958.78	-0.00128758		3488.77	0.00207222		4018.77	-0.00371796
309	-0.01391737		838.99	0.0008411		1368.99	0.0005808		1898.99	-0.00181743		2428.98	-0.00957642		2958.98	-0.00084666		3488.97	0.00191396		4018.97	-0.0035686
309.2	-0.01340985		839.19	0.00166279		1369.19	0.00012733		1899.19	-0.00187248		2429.18	-0.00913131		2959.18	0.00028769		3489.17	0.00187805		4019.17	-0.00362366
309.4	-0.01271867		839.39	0.00288115		1369.39	-0.00036857		1899.39	-0.00121343		2429.38	-0.00871958		2959.38	-0.00022056		3489.37	0.00198167		4019.37	-0.00302871
309.6	-0.01308294		839.59	0.00265676		1369.59	-0.00161656		1899.59	0.00022119		2429.58	-0.00948037		2959.58	-0.00019398		3489.57	0.0020528		4019.57	-0.00248729
309.8	-0.01220079		839.79	0.00245682		1369.79	-0.00215085		1899.79	0.00055338		2429.78	-0.00900763		2959.78	0.00011343		3489.77	0.00165749		4019.77	-0.00283912
310	-0.01089781		839.99	0.00245789		1369.99	-0.00195695		1899.99	0.00056039		2429.98	-0.00822903		2959.98	-0.00102706		3489.97	0.00148188		4019.97	-0.00280731
310.2	-0.01115258		840.19	0.00323395		1370.19	-0.00130813		1900.19	-0.00037558		2430.18	-0.0083249		2960.18	-0.0020876		3490.17	0.0022115		4020.17	-0.00263279
310.4	-0.01093449		840.39	0.00354279		1370.39	-0.00177271		1900.39	0.000102		2430.38	-0.00900565		2960.38	-0.00320503		3490.37	0.00246055		4020.37	-0.00257204
310.6	-0.01093936		840.59	0.00435954		1370.59	-0.00112427		1900.59	0.00037367		2430.58	-0.00914719		2960.58	-0.00410231		3490.57	0.00225419		4020.57	-0.00263106
310.8	-0.01138634		840.79	0.00415991		1370.79	-0.00129365		1900.79	-0.00064434		2430.78	-0.00911985		2960.78	-0.00412171		3490.77	0.00186772		4020.77	-0.00280683
311	-0.01072224		840.99	0.00387136		1370.99	-0.0009161		1900.99	0.00004657		2430.98	-0.00996982		2960.98	-0.0045645		3490.97	0.00149274		4020.97	-0.00344755
311.2	-0.01071783		841.19	0.00351316		1371.19	-0.00104855		1901.19	0.00017774		2431.18	-0.00922354		2961.18	-0.00517465		3491.17	0.00073302		4021.17	-0.00318794
311.4	-0.01012959		841.39	0.00350092		1371.39	-0.00019536		1901.39	0.00038591		2431.38	-0.00992533		2961.38	-0.00609528		3491.37	0.00090769		4021.37	-0.00335069
311.6	-0.00951689		841.59	0.00365731		1371.59	0.00037407		1901.59	0.00068604		2431.58	-0.0106645		2961.58	-0.00690386		3491.57	0.00168591		4021.57	-0.00361486
311.8	-0.00913991		841.79	0.00266074		1371.79	0.00097329		1901.79	-0.00021041		2431.78	-0.01065452		2961.78	-0.00662157		3491.77	0.00218323		4021.77	-0.00379471
312	-0.00947672		841.99	0.00207894		1371.99	0.00230512		1901.99	-0.00050158		2431.98	-0.01102551		2961.98	-0.0057175		3491.97	0.00221772		4021.97	-0.00462925
312.2	-0.00915797		842.19	0.0016067		1372.19	0.00286914		1902.19	-0.00093563		2432.18	-0.01107427		2962.18	-0.00461391		3492.17	0.00250835		4022.17	-0.00604668
312.4	-0.00902172		842.39	0.00144526		1372.39	0.00369633		1902.39	-0.0020998		2432.38	-0.01054744		2962.38	-0.00388165		3492.37	0.0026337		4022.37	-0.00605282
312.6	-0.00966847		842.59	0.00045583		1372.59	0.00348942		1902.59	-0.00131469		2432.58	-0.01021591		2962.58	-0.00252808		3492.57	0.00234262		4022.57	-0.00677111
312.8	-0.01106334		842.79	-0.000402		1372.79	0.00376532		1902.79	-0.00122189		2432.78	-0.01068442		2962.78	-0.00102429		3492.77	0.00193214		4022.77	-0.00676296
313	-0.01108968		842.99	-0.0000378		1372.99	0.00401287		1902.99	-0.00157992		2432.98	-0.01023157		2962.98	-0.00036129		3492.97	0.00210489		4022.97	-0.0069895
313.2	-0.01030747		843.19	-0.00047573		1373.19	0.00429302		1903.19	-0.00111034		2433.18	-0.0095416		2963.18	0.00027854		3493.17	0.00213881		4023.17	-0.00711121
313.4	-0.00984015		843.39	-0.00142337		1373.39	0.00411204		1903.39	-0.00007266		2433.38	-0.00915108		2963.38	-0.00001882		3493.37	0.00254697		4023.37	-0.00700919
313.6	-0.01005324		843.59	-0.00189528		1373.59	0.0041719		1903.59	0.00053719		2433.58	-0.00915267		2963.58	0.00045183		3493.57	0.00230207		4023.57	-0.00682893
313.8	-0.0099665		843.79	-0.00142688		1373.79	0.00400663		1903.79	0.00009283		2433.78	-0.0083389		2963.78	0.00097269		3493.77	0.0022808		4023.77	-0.00692665
314	-0.01141991		843.99	-0.00167748		1373.99	0.00423657		1903.99	-0.0002595		2433.98	-0.00802281		2963.98	0.00005032		3493.97	0.0019841		4023.97	-0.00639591
314.2	-0.01196019		844.19	-0.00125424		1374.19	0.00448249		1904.19	-0.00083189		2434.18	-0.00811948		2964.18	-0.00053178		3494.17	0.00214341		4024.17	-0.00610148
314.4	-0.0134156		844.39	-0.00064927		1374.39	0.00398797		1904.39	0.00059618		2434.38	-0.00835537		2964.38	-0.00089953		3494.37	0.00159616		4024.37	-0.00542661
314.6	-0.01482399		844.59	-0.00004225		1374.59	0.0038357		1904.59	0.00127559		2434.58	-0.00844629		2964.58	-0.00155223		3494.57	0.00079201		4024.57	-0.00518334
314.8	-0.01474338		844.79	0.00012901		1374.79	0.00325201		1904.79	0.00132892		2434.78	-0.00826101		2964.78	-0.00085451		3494.77	0.00136587		4024.77	-0.00466079
315	-0.01420425		844.99	0.00049134		1374.99	0.00290097		1904.99	0.00206132		2434.98	-0.00887909		2964.98	-0.00158763		3494.97	0.00143699		4024.97	-0.00398847
315.2	-0.01423903		845.19	0.00105615		1375.19	0.00208716		1905.19	0.00234994		2435.18	-0.00853737		2965.18	-0.00195058		3495.17	0.00142019		4025.17	-0.00385481
315.4	-0.0132491		845.39	0.0025808		1375.39	0.00243351		1905.39	0.00117896		2435.38	-0.00924012		2965.38	-0.00168164		3495.37	0.00165771		4025.37	-0.00406587
315.6	-0.01291086		845.59	0.00246914		1375.59	0.00197817		1905.59	0.00137987		2435.58	-0.00939235		2965.58	-0.00021853		3495.57	0.00143135		4025.57	-0.00366919
315.8	-0.01313935		845.79	0.00217951		1375.79	0.00236203		1905.79	0.00025336		2435.78	-0.00963985		2965.78	-0.00019489		3495.77	0.00166917		4025.77	-0.00344924
316	-0.01264869		845.99	0.00209032		1375.99	0.00345963		1905.99	-0.00002192		2435.98	-0.00947097		2965.98	-0.00013931		3495.97	0.00156742		4025.97	-0.004016
316.2	-0.0126238		846.19	0.00212389		1376.19	0.00338654		1906.19	-0.00062347		2436.18	-0.00970908		2966.18	0.00022125		3496.17	0.00214206		4026.17	-0.00407817
316.4	-0.01293997		846.39	0.00200902		1376.39	0.00375466		1906.39	-0.001383		2436.38	-0.00974324		2966.38	0.0004821		3496.37	0.00265429		4026.37	-0.00368466
316.6	-0.01353028		846.59	0.00123887		1376.59	0.00381379		1906.59	-0.00084627		2436.58	-0.01015697		2966.58	0.00097803		3496.57	0.00286927		4026.57	-0.00338363
316.8	-0.01397361		846.79	0.00130927		1376.79	0.00447641		1906.79	-0.00115502		2436.78	-0.01009885		2966.78	0.00037903		3496.77	0.00252564		4026.77	-0.0030593
317	-0.01350705		846.99	0.00140784		1376.99	0.00457477		1906.99	-0.00138666		2436.98	-0.00916099		2966.98	-0.0005503		3496.97	0.00263549		4026.97	-0.00348121
317.2	-0.013302		847.19	0.00059065		1377.19	0.00395709		1907.19	-0.00118536		2437.18	-0.00802407		2967.18	-0.00018519		3497.17	0.00327709		4027.17	-0.00348049
317.4	-0.01387113		847.39	0.00085017		1377.39	0.00405281		1907.39	-0.00124221		2437.38	-0.00878015		2967.38	-0.00064494		3497.37	0.00337303		4027.37	-0.00365967
317.6	-0.01466002		847.59	0.00139812		1377.59	0.00479433		1907.59	-0.00153629		2437.58	-0.00860225		2967.58	-0.0004011		3497.57	0.0030972		4027.57	-0.00319166
317.8	-0.01552519		847.79	0.0011273		1377.79	0.00473576		1907.79	-0.00229814		2437.78	-0.00824587		2967.78	-0.00077816		3497.77	0.00291396		4027.77	-0.00305866
318	-0.01643578		847.99	0.00081576		1377.99	0.00544954		1907.99	-0.00282585		2437.98	-0.00749171		2967.98	-0.0020213		3497.97	0.00245018		4027.97	-0.00289454
318.2	-0.01649118		848.19	0.001379		1378.19	0.00621393		1908.19	-0.0028281		2438.18	-0.00707644		2968.18	-0.00208981		3498.17	0.00239873		4028.17	-0.00246572
318.4	-0.01762229		848.39	0.00169447		1378.39	0.00593091		1908.39	-0.00223064		2438.38	-0.00767294		2968.38	-0.0025261		3498.37	0.00220555		4028.37	-0.00207265
318.6	-0.01694084		848.59	0.00233031		1378.59	0.00661095		1908.59	-0.00159253		2438.58	-0.00809823		2968.58	-0.0025903		3498.57	0.00126464		4028.57	-0.00244414
318.8	-0.01710256		848.79	0.00135237		1378.79	0.00667813		1908.79	-0.00187815		2438.78	-0.0089178		2968.78	-0.00225364		3498.77	0.00149777		4028.77	-0.00264826
319	-0.01663332		848.99	0.00135693		1378.99	0.00621962		1908.99	-0.00119307		2438.98	-0.0089256		2968.98	-0.00255679		3498.97	0.00067806		4028.97	-0.00328873
319.2	-0.01627056		849.19	0.00151739		1379.19	0.00585005		1909.19	-0.00086909		2439.18	-0.00873088		2969.18	-0.00212622		3499.17	0.00060691		4029.17	-0.00368241
319.4	-0.01570466		849.39	0.00212435		1379.39	0.00572776		1909.39	-0.0013971		2439.38	-0.00859614		2969.38	-0.00154774		3499.37	0.0001366		4029.37	-0.00289564
319.6	-0.0150081		849.59	0.00203429		1379.59	0.00580009		1909.59	0.0006395		2439.58	-0.00894489		2969.58	-0.00072442		3499.57	0.00014689		4029.57	-0.00274559
319.8	-0.01565816		849.79	0.00225039		1379.79	0.00624866		1909.79	0.0007246		2439.78	-0.00936473		2969.78	-0.00180687		3499.77	0.00156417		4029.77	-0.00289093
320	-0.01518888		849.99	0.00269382		1379.99	0.00611069		1909.99	0.00067394		2439.98	-0.00910821		2969.98	-0.00147474		3499.97	0.00224268		4029.97	-0.00293605
320.2	-0.01502943		850.19	0.00246051		1380.19	0.00586222		1910.19	0.00113549		2440.18	-0.00999762		2970.18	-0.00111151		3500.17	0.00206002		4030.17	-0.0026647
320.4	-0.01505513		850.39	0.0019951		1380.39	0.00604981		1910.39	0.00174788		2440.38	-0.01037322		2970.38	0.00011941		3500.37	0.00268187		4030.37	-0.00272195
320.6	-0.01533591		850.59	0.00189913		1380.59	0.0053698		1910.59	0.00173182		2440.58	-0.00989585		2970.58	0.00031459		3500.57	0.00261293		4030.57	-0.00224476
320.8	-0.01600215		850.79	0.00135801		1380.79	0.00506176		1910.79	0.00126771		2440.78	-0.00924747		2970.78	0.00042869		3500.77	0.0018037		4030.77	-0.00300246
321	-0.01611094		850.99	0.00153603		1380.99	0.00501587		1910.99	0.0011313		2440.98	-0.00871243		2970.98	0.00078978		3500.97	0.0026308		4030.97	-0.00298624
321.2	-0.01577706		851.19	0.00133049		1381.19	0.00460723		1911.19	0.0010195		2441.18	-0.00894554		2971.18	0.00082421		3501.17	0.00321632		4031.17	-0.00343436
321.4	-0.01640975		851.39	0.00202283		1381.39	0.00476201		1911.39	0.00028139		2441.38	-0.008955		2971.38	0.00059026		3501.37	0.00257103		4031.37	-0.00350194
321.6	-0.01634865		851.59	0.00242285		1381.59	0.0047176		1911.59	-0.00037424		2441.58	-0.00836551		2971.58	0.00087732		3501.57	0.00327523		4031.57	-0.00303685
321.8	-0.01607365		851.79	0.00173311		1381.79	0.00494424		1911.79	-0.00107564		2441.78	-0.00821429		2971.78	-0.00002339		3501.77	0.00288024		4031.77	-0.00274705
322	-0.01595913		851.99	0.00204341		1381.99	0.00535293		1911.99	-0.001488		2441.98	-0.00741462		2971.98	0.00007694		3501.97	0.00217635		4031.97	-0.00279019
322.2	-0.0159009		852.19	0.00239029		1382.19	0.0059954		1912.19	-0.00159887		2442.18	-0.00736309		2972.18	0.00044111		3502.17	0.00255692		4032.17	-0.00253351
322.4	-0.01594273		852.39	0.00221332		1382.39	0.00598307		1912.39	-0.00147202		2442.38	-0.00845881		2972.38	-0.00044221		3502.37	0.00181535		4032.37	-0.00218349
322.6	-0.01501628		852.59	0.00254177		1382.59	0.00652445		1912.59	-0.0009515		2442.58	-0.00783067		2972.58	-0.00052102		3502.57	0.00127861		4032.57	-0.00187942
322.8	-0.01497719		852.79	0.00139226		1382.79	0.00604998		1912.79	-0.00106767		2442.78	-0.00812389		2972.78	-0.00064043		3502.77	0.00070831		4032.77	-0.00187442
323	-0.0135252		852.99	0.00274322		1382.99	0.00542091		1912.99	-0.00046645		2442.98	-0.00737557		2972.98	-0.00081414		3502.97	0.00054345		4032.97	-0.00183157
323.2	-0.01301019		853.19	0.00333287		1383.19	0.00560852		1913.19	-0.00067696		2443.18	-0.0076646		2973.18	-0.00094365		3503.17	-0.00000709		4033.17	-0.00143028
323.4	-0.01211358		853.39	0.0036153		1383.39	0.00600091		1913.39	0.00009898		2443.38	-0.00794161		2973.38	-0.0012846		3503.37	-0.00059324		4033.37	-0.00135998
323.6	-0.01165628		853.59	0.00379989		1383.59	0.00582898		1913.59	0.00005873		2443.58	-0.00877462		2973.58	-0.00141281		3503.57	-0.00030273		4033.57	-0.00214021
323.8	-0.01229961		853.79	0.00351816		1383.79	0.0052108		1913.79	-0.00096936		2443.78	-0.00892564		2973.78	-0.00207205		3503.77	0.00044004		4033.77	-0.00175925
324	-0.01111208		853.99	0.0022555		1383.99	0.00538246		1913.99	-0.00069511		2443.98	-0.00921824		2973.98	-0.00057969		3503.97	0.00070445		4033.97	-0.00149994
324.2	-0.01080352		854.19	0.00131662		1384.19	0.00480047		1914.19	0.00007341		2444.18	-0.00948775		2974.18	0.00075299		3504.17	0.00028708		4034.17	-0.00218981
324.4	-0.01057309		854.39	0.00118665		1384.39	0.00474897		1914.39	-0.00015002		2444.38	-0.00923722		2974.38	0.00146474		3504.37	0.00099134		4034.37	-0.00217837
324.6	-0.01028155		854.59	0.00097629		1384.59	0.00445461		1914.59	-0.00071536		2444.58	-0.00842874		2974.58	0.00166528		3504.57	0.00069531		4034.57	-0.00260535
324.8	-0.01082725		854.79	0.00013926		1384.79	0.00500381		1914.79	-0.00110205		2444.78	-0.00833418		2974.78	0.00209771		3504.77	0.00042157		4034.77	-0.00393976
325	-0.0103354		854.99	0.00007403		1384.99	0.00588593		1914.99	-0.00127858		2444.98	-0.00819003		2974.98	0.0024271		3504.97	0.00044279		4034.97	-0.00438692
325.2	-0.00992347		855.19	-0.0003919		1385.19	0.00567889		1915.19	-0.00121253		2445.18	-0.00797382		2975.18	0.00172331		3505.17	0.00008424		4035.17	-0.00398788
325.4	-0.01153066		855.39	0.00007137		1385.39	0.00561957		1915.39	-0.00131673		2445.38	-0.00730589		2975.38	0.0012645		3505.37	0.00049352		4035.37	-0.00392362
325.6	-0.01266406		855.59	-0.00016049		1385.59	0.00603125		1915.59	-0.00047489		2445.58	-0.00814773		2975.58	0.00146353		3505.57	0.00145324		4035.57	-0.00303955
325.8	-0.01379692		855.79	-0.00000346		1385.79	0.00615191		1915.79	-0.00036196		2445.78	-0.00742308		2975.78	0.00077912		3505.77	0.00157971		4035.77	-0.00306626
326	-0.01500545		855.99	0.00124431		1385.99	0.00643248		1915.99	-0.00076384		2445.98	-0.00723552		2975.98	0.00095353		3505.97	0.00131856		4035.97	-0.00259197
326.2	-0.01641384		856.19	0.00174387		1386.19	0.00680861		1916.19	-0.00061507		2446.18	-0.00643177		2976.18	0.00004979		3506.17	0.00181068		4036.17	-0.00241716
326.4	-0.01699843		856.39	0.00197046		1386.39	0.00645413		1916.39	-0.00018273		2446.38	-0.0064232		2976.38	-0.00092796		3506.37	0.00126537		4036.37	-0.00243917
326.6	-0.01696377		856.59	0.00280315		1386.59	0.00611762		1916.59	0.00071167		2446.58	-0.00612824		2976.58	-0.00081724		3506.57	0.00102047		4036.57	-0.00203829
326.8	-0.01666502		856.79	0.00293455		1386.79	0.00547943		1916.79	0.0005116		2446.78	-0.00712148		2976.78	-0.00135539		3506.77	0.00038448		4036.77	-0.00233092
327	-0.01720869		856.99	0.00390116		1386.99	0.00528191		1916.99	0.00021246		2446.98	-0.00757174		2976.98	-0.00115291		3506.97	0.00002956		4036.97	-0.00265685
327.2	-0.01784576		857.19	0.00387064		1387.19	0.00476223		1917.19	-0.00005561		2447.18	-0.00813353		2977.18	-0.00094542		3507.17	-0.00019969		4037.17	-0.00223567
327.4	-0.01758094		857.39	0.00353464		1387.39	0.0038575		1917.39	0.00018831		2447.38	-0.0084257		2977.38	-0.0010035		3507.37	-0.00024864		4037.37	-0.00233861
327.6	-0.01713419		857.59	0.00363487		1387.59	0.00385065		1917.59	-0.00106305		2447.58	-0.00924557		2977.58	-0.00153778		3507.57	0.00003271		4037.57	-0.00255528
327.8	-0.01613599		857.79	0.00403704		1387.79	0.00367064		1917.79	-0.00054076		2447.78	-0.00925204		2977.78	-0.00119428		3507.77	0.00053091		4037.77	-0.00208626
328	-0.01515258		857.99	0.00355054		1387.99	0.00403859		1917.99	-0.00059205		2447.98	-0.00986184		2977.98	0.00011612		3507.97	0.00077662		4037.97	-0.00224681
328.2	-0.01448312		858.19	0.00375473		1388.19	0.00382316		1918.19	-0.00079058		2448.18	-0.00995227		2978.18	0.0002789		3508.17	0.00013938		4038.17	-0.00257146
328.4	-0.01297488		858.39	0.00431521		1388.39	0.00402875		1918.39	-0.00111999		2448.38	-0.00993762		2978.38	-0.00003763		3508.37	-0.00008134		4038.37	-0.00192514
328.6	-0.01242812		858.59	0.00469462		1388.59	0.00471211		1918.59	-0.00229286		2448.58	-0.0091348		2978.58	0.000345		3508.57	0.0000147		4038.57	-0.00258567
328.8	-0.01148082		858.79	0.00351305		1388.79	0.00517412		1918.79	-0.00239167		2448.78	-0.00893242		2978.78	0.00133726		3508.77	0.00031257		4038.77	-0.00238667
329	-0.0100799		858.99	0.00354101		1388.99	0.00592359		1918.99	-0.0016005		2448.98	-0.00856481		2978.98	0.00143426		3508.97	0.00000216		4038.97	-0.00136177
329.2	-0.00989751		859.19	0.00362496		1389.19	0.00565904		1919.19	-0.00078585		2449.18	-0.00826074		2979.18	0.00208423		3509.17	0.00094257		4039.17	-0.00040638
329.4	-0.01066905		859.39	0.003849		1389.39	0.00573119		1919.39	-0.00019233		2449.38	-0.00804428		2979.38	0.00292966		3509.37	0.00207643		4039.37	-0.00031156
329.6	-0.0109583		859.59	0.00376739		1389.59	0.00592986		1919.59	0.00051283		2449.58	-0.0077195		2979.58	0.0032756		3509.57	0.00326791		4039.57	-0.00053503
329.8	-0.01179419		859.79	0.0042857		1389.79	0.00676133		1919.79	0.00032484		2449.78	-0.00768102		2979.78	0.00246167		3509.77	0.00340659		4039.77	-0.00080474
330	-0.01187464		859.99	0.00480119		1389.99	0.00655669		1919.99	-0.00004091		2449.98	-0.00767106		2979.98	0.00213651		3509.97	0.0033982		4039.97	-0.00130526
330.2	-0.01253227		860.19	0.0046181		1390.19	0.00712873		1920.19	0.00029783		2450.18	-0.0065396		2980.18	0.00118254		3510.17	0.00410126		4040.17	-0.00192611
330.4	-0.013278		860.39	0.00476042		1390.39	0.00661469		1920.39	0.00025218		2450.38	-0.00654134		2980.38	0.00132894		3510.37	0.00480823		4040.37	-0.00255572
330.6	-0.0132668		860.59	0.00480158		1390.59	0.00658376		1920.59	0.00076788		2450.58	-0.00600229		2980.58	0.00124833		3510.57	0.00508214		4040.57	-0.00286954
330.8	-0.01360678		860.79	0.00422886		1390.79	0.00632901		1920.79	0.00020587		2450.78	-0.00548712		2980.78	0.00122576		3510.77	0.0050039		4040.77	-0.00331562
331	-0.0148186		860.99	0.00340773		1390.99	0.00642463		1920.99	-0.00001992		2450.98	-0.00547097		2980.98	0.00133535		3510.97	0.00451645		4040.97	-0.00382611
331.2	-0.01463515		861.19	0.00280816		1391.19	0.00645248		1921.19	0.00037213		2451.18	-0.00588237		2981.18	0.00082439		3511.17	0.00425205		4041.17	-0.00453398
331.4	-0.01417989		861.39	0.00225462		1391.39	0.00667995		1921.39	-0.00020109		2451.38	-0.00567401		2981.38	0.00056199		3511.37	0.00405365		4041.37	-0.00523536
331.6	-0.01368518		861.59	0.00241022		1391.59	0.00780288		1921.59	-0.00073324		2451.58	-0.00617796		2981.58	-0.00022217		3511.57	0.00400148		4041.57	-0.00534957
331.8	-0.01336149		861.79	0.00271532		1391.79	0.00720995		1921.79	-0.0011965		2451.78	-0.00602604		2981.78	-0.00047045		3511.77	0.00375865		4041.77	-0.00537006
332	-0.01362157		861.99	0.00201869		1391.99	0.00707631		1921.99	-0.00234507		2451.98	-0.00662621		2981.98	-0.0007249		3511.97	0.00356074		4041.97	-0.00511894
332.2	-0.01331443		862.19	0.00190719		1392.19	0.00670682		1922.19	-0.00286924		2452.18	-0.00654569		2982.18	-0.00125257		3512.17	0.00273934		4042.17	-0.0044707
332.4	-0.01309406		862.39	0.00257286		1392.39	0.00606014		1922.39	-0.00331608		2452.38	-0.0065259		2982.38	-0.00133602		3512.37	0.00283713		4042.37	-0.00348855
332.6	-0.01303426		862.59	0.00250638		1392.59	0.00584601		1922.59	-0.00378454		2452.58	-0.0070418		2982.58	-0.00096442		3512.57	0.00291458		4042.57	-0.00394002
332.8	-0.01259404		862.79	0.00107274		1392.79	0.00558124		1922.79	-0.00296247		2452.78	-0.00790166		2982.78	-0.00041765		3512.77	0.00219393		4042.77	-0.00335631
333	-0.01255896		862.99	0.00152726		1392.99	0.00544325		1922.99	-0.0021213		2452.98	-0.00775404		2982.98	-0.00017805		3512.97	0.00131448		4042.97	-0.00304115
333.2	-0.01267412		863.19	0.00100839		1393.19	0.00508917		1923.19	-0.00232039		2453.18	-0.00858714		2983.18	0.00131158		3513.17	0.00072872		4043.17	-0.00297808
333.4	-0.01342385		863.39	0.00097512		1393.39	0.00440944		1923.39	-0.00209195		2453.38	-0.00857933		2983.38	0.00056271		3513.37	0.00101622		4043.37	-0.00333127
333.6	-0.01368095		863.59	0.00156807		1393.59	0.00426381		1923.59	-0.00188387		2453.58	-0.00948036		2983.58	0.00056804		3513.57	0.0012945		4043.57	-0.00414285
333.8	-0.01435257		863.79	0.00287542		1393.79	0.00474238		1923.79	-0.00202854		2453.78	-0.0104456		2983.78	0.00026355		3513.77	0.00109322		4043.77	-0.00352
334	-0.01442449		863.99	0.00375841		1393.99	0.00484362		1923.99	-0.00196311		2453.98	-0.01046753		2983.98	0.0002542		3513.97	0.0018172		4043.97	-0.00339515
334.2	-0.01528905		864.19	0.00439761		1394.19	0.00599371		1924.19	-0.00132646		2454.18	-0.0101673		2984.18	0.00033945		3514.17	0.00198301		4044.17	-0.00293077
334.4	-0.01571052		864.39	0.00415677		1394.39	0.00639969		1924.39	-0.00068148		2454.38	-0.00989799		2984.38	0.00108347		3514.37	0.00257498		4044.37	-0.00323615
334.6	-0.01551201		864.59	0.00368411		1394.59	0.00750144		1924.59	-0.00008085		2454.58	-0.00939965		2984.58	0.00111437		3514.57	0.00355315		4044.57	-0.00292656
334.8	-0.01631683		864.79	0.00322919		1394.79	0.00755168		1924.79	0.00013502		2454.78	-0.00887717		2984.78	0.00089777		3514.77	0.00368601		4044.77	-0.00257577
335	-0.01655849		864.99	0.00225314		1394.99	0.00924388		1924.99	0.00079301		2454.98	-0.00954231		2984.98	0.00130722		3514.97	0.00417621		4044.97	-0.00332846
335.2	-0.01590562		865.19	0.00253752		1395.19	0.00989425		1925.19	0.0007013		2455.18	-0.00913936		2985.18	0.00126936		3515.17	0.00470966		4045.17	-0.00406321
335.4	-0.01506317		865.39	0.00260512		1395.39	0.0096365		1925.39	0.00078834		2455.38	-0.0083045		2985.38	0.00133008		3515.37	0.00583433		4045.37	-0.0048209
335.6	-0.014274		865.59	0.00201315		1395.59	0.01042174		1925.59	0.00059686		2455.58	-0.00800266		2985.58	0.00072617		3515.57	0.00550301		4045.57	-0.00529763
335.8	-0.01367325		865.79	0.00179772		1395.79	0.00999741		1925.79	0.00003964		2455.78	-0.00783147		2985.78	0.00057599		3515.77	0.0057994		4045.77	-0.00611769
336	-0.01346376		865.99	0.00097465		1395.99	0.00976024		1925.99	-0.00009807		2455.98	-0.0072545		2985.98	0.00045216		3515.97	0.00560054		4045.97	-0.00545884
336.2	-0.01276605		866.19	0.00077436		1396.19	0.00891338		1926.19	0.00052956		2456.18	-0.00682734		2986.18	0.00006555		3516.17	0.0046803		4046.17	-0.00492798
336.4	-0.01175704		866.39	0.00143062		1396.39	0.00828847		1926.39	0.00087028		2456.38	-0.00725992		2986.38	-0.00009423		3516.37	0.00393271		4046.37	-0.00526277
336.6	-0.01106084		866.59	0.00047856		1396.59	0.00846086		1926.59	0.00136423		2456.58	-0.00798762		2986.58	-0.00069186		3516.57	0.00382377		4046.57	-0.00542435
336.8	-0.01039382		866.79	0.00007346		1396.79	0.00786186		1926.79	0.00144552		2456.78	-0.0070908		2986.78	-0.00134095		3516.77	0.00342661		4046.77	-0.0048887
337	-0.01063645		866.99	-0.0002567		1396.99	0.00710778		1926.99	0.00094942		2456.98	-0.00749014		2986.98	-0.00172592		3516.97	0.00346217		4046.97	-0.00491136
337.2	-0.01044975		867.19	-0.00038844		1397.19	0.00642949		1927.19	0.00057547		2457.18	-0.00796493		2987.18	-0.00203735		3517.17	0.00264996		4047.17	-0.00527845
337.4	-0.01036824		867.39	0.00019492		1397.39	0.00561676		1927.39	0.00100564		2457.38	-0.00785921		2987.38	-0.00269586		3517.37	0.00289666		4047.37	-0.00607994
337.6	-0.01044547		867.59	0.00050502		1397.59	0.00574493		1927.59	0.00180707		2457.58	-0.00847919		2987.58	-0.00199418		3517.57	0.00142888		4047.57	-0.00568443
337.8	-0.0118799		867.79	0.00099927		1397.79	0.00604054		1927.79	0.00151364		2457.78	-0.00844288		2987.78	-0.00280641		3517.77	0.00148079		4047.77	-0.00467304
338	-0.01240714		867.99	0.00050232		1397.99	0.00571747		1927.99	0.00151213		2457.98	-0.00799774		2987.98	-0.00227458		3517.97	0.00122039		4047.97	-0.0043122
338.2	-0.01319054		868.19	0.00063461		1398.19	0.0052353		1928.19	0.00170282		2458.18	-0.00784492		2988.18	-0.0016501		3518.17	0.0009957		4048.17	-0.00330657
338.4	-0.0136614		868.39	-0.00000487		1398.39	0.00551043		1928.39	0.00241489		2458.38	-0.0077786		2988.38	-0.00139858		3518.37	0.00228203		4048.37	-0.00272305
338.6	-0.01479284		868.59	0.00003979		1398.59	0.00514707		1928.59	0.00197238		2458.58	-0.00780512		2988.58	-0.00098971		3518.57	0.00322143		4048.57	-0.00247358
338.8	-0.01465761		868.79	-0.00025893		1398.79	0.0046699		1928.79	0.00216359		2458.78	-0.00754479		2988.78	-0.00115689		3518.77	0.00336377		4048.77	-0.00189966
339	-0.0145901		868.99	0.00038351		1398.99	0.00566777		1928.99	0.00153889		2458.98	-0.00734161		2988.98	-0.00020097		3518.97	0.00379674		4048.97	-0.0022499
339.2	-0.01422983		869.19	0.00160143		1399.19	0.00575699		1929.19	0.0001404		2459.18	-0.00687691		2989.18	-0.00051077		3519.17	0.0039962		4049.17	-0.00312546
339.4	-0.01431624		869.39	0.00085264		1399.39	0.00604927		1929.39	-0.00062927		2459.38	-0.00662712		2989.38	-0.00030143		3519.37	0.00445193		4049.37	-0.00347328
339.6	-0.01451297		869.59	0.00106807		1399.59	0.00663145		1929.59	-0.00191173		2459.58	-0.00646305		2989.58	-0.00023032		3519.57	0.00379239		4049.57	-0.00340062
339.8	-0.01414106		869.79	0.00128576		1399.79	0.00635396		1929.79	-0.00203066		2459.78	-0.00694201		2989.78	-0.00063355		3519.77	0.00407765		4049.77	-0.00316454
340	-0.01431297		869.99	0.00130967		1399.99	0.00597731		1929.99	-0.00185642		2459.98	-0.00666898		2989.98	-0.0005745		3519.97	0.00328424		4049.97	-0.00255404
340.2	-0.01355396		870.19	0.00209382		1400.19	0.00574427		1930.19	-0.00161587		2460.18	-0.00710871		2990.18	-0.00017201		3520.17	0.00254291		4050.17	-0.00263014
340.4	-0.01262079		870.39	0.00290002		1400.39	0.00626354		1930.39	-0.00194144		2460.38	-0.00720163		2990.38	-0.00018356		3520.37	0.00188539		4050.37	-0.00241786
340.6	-0.01284593		870.59	0.00330748		1400.59	0.00655133		1930.59	-0.00227799		2460.58	-0.00779328		2990.58	0.00023064		3520.57	0.00291835		4050.57	-0.00230088
340.8	-0.01244412		870.79	0.00371851		1400.79	0.00596543		1930.79	-0.00329215		2460.78	-0.00765691		2990.78	0.00001988		3520.77	0.0028386		4050.77	-0.00226805
341	-0.01258442		870.99	0.00386467		1400.99	0.00558785		1930.99	-0.00349431		2460.98	-0.0087202		2990.98	-0.00058918		3520.97	0.00263974		4050.97	-0.00265635
341.2	-0.01262505		871.19	0.00400649		1401.19	0.00622943		1931.19	-0.00268861		2461.18	-0.00895999		2991.18	-0.00098468		3521.17	0.00152891		4051.17	-0.00371168
341.4	-0.01259328		871.39	0.00465916		1401.39	0.00666477		1931.39	-0.0018742		2461.38	-0.00911292		2991.38	-0.0010109		3521.37	0.00118845		4051.37	-0.00436461
341.6	-0.01352065		871.59	0.00479602		1401.59	0.00687822		1931.59	-0.0012012		2461.58	-0.00896932		2991.58	-0.00148207		3521.57	0.00013819		4051.57	-0.00506315
341.8	-0.01375269		871.79	0.00485396		1401.79	0.00695906		1931.79	-0.00125431		2461.78	-0.00898772		2991.78	-0.00205588		3521.77	0.00057715		4051.77	-0.00533975
342	-0.0134437		871.99	0.00442814		1401.99	0.00751659		1931.99	0.0001065		2461.98	-0.00954298		2991.98	-0.00082678		3521.97	0.00010366		4051.97	-0.00635945
342.2	-0.01351412		872.19	0.00361543		1402.19	0.00738249		1932.19	0.00119512		2462.18	-0.01104648		2992.18	-0.00076152		3522.17	0.00054461		4052.17	-0.00646678
342.4	-0.01296383		872.39	0.00322009		1402.39	0.00750518		1932.39	0.00195864		2462.38	-0.01146907		2992.38	-0.00164895		3522.37	0.00120756		4052.37	-0.00686868
342.6	-0.01268218		872.59	0.00366226		1402.59	0.00744599		1932.59	0.00277863		2462.58	-0.01143197		2992.58	-0.00116393		3522.57	0.00153702		4052.57	-0.00775335
342.8	-0.0116048		872.79	0.00283555		1402.79	0.00781089		1932.79	0.00297863		2462.78	-0.0106429		2992.78	-0.0014327		3522.77	0.00197549		4052.77	-0.00798472
343	-0.01271991		872.99	0.0029566		1402.99	0.00761148		1932.99	0.00273743		2462.98	-0.00997485		2992.98	-0.00084727		3522.97	0.0023742		4052.97	-0.00862281
343.2	-0.01246022		873.19	0.00192547		1403.19	0.00792775		1933.19	0.00234686		2463.18	-0.00948935		2993.18	-0.00114558		3523.17	0.00208669		4053.17	-0.00938815
343.4	-0.01292689		873.39	0.00046041		1403.39	0.0072399		1933.39	0.00217342		2463.38	-0.0092187		2993.38	-0.00077715		3523.37	0.00230275		4053.37	-0.00861371
343.6	-0.0128724		873.59	-0.00013299		1403.59	0.00711029		1933.59	0.00246066		2463.58	-0.00906625		2993.58	-0.00009511		3523.57	0.00198601		4053.57	-0.00848245
343.8	-0.01306737		873.79	-0.00103021		1403.79	0.00709715		1933.79	0.00287828		2463.78	-0.00921057		2993.78	0.00038878		3523.77	0.00170142		4053.77	-0.00815337
344	-0.01421543		873.99	-0.00211614		1403.99	0.0065905		1933.99	0.00269492		2463.98	-0.00843272		2993.98	0.00174723		3523.97	0.00079805		4053.97	-0.00695679
344.2	-0.01427442		874.19	-0.00204197		1404.19	0.00606721		1934.19	0.00221472		2464.18	-0.00788927		2994.18	0.00241289		3524.17	0.00042816		4054.17	-0.00654089
344.4	-0.01419699		874.39	-0.00241335		1404.39	0.00574852		1934.39	0.00183908		2464.38	-0.00743925		2994.38	0.0030301		3524.37	-0.00000579		4054.37	-0.00534885
344.6	-0.01471367		874.59	-0.0023177		1404.59	0.00578431		1934.59	0.00090387		2464.58	-0.00713845		2994.58	0.00375842		3524.57	0.00048332		4054.57	-0.00456146
344.8	-0.01558742		874.79	-0.00329589		1404.79	0.00528057		1934.79	0.00023342		2464.78	-0.00711587		2994.78	0.00379492		3524.77	0.0004033		4054.77	-0.00348468
345	-0.01603031		874.99	-0.00264114		1404.99	0.00545241		1934.99	0.00046364		2464.98	-0.00697603		2994.98	0.00399038		3524.97	-0.00021043		4054.97	-0.00360319
345.2	-0.01713791		875.19	-0.00250506		1405.19	0.00575325		1935.19	-0.00002056		2465.18	-0.00696057		2995.18	0.00367596		3525.17	-0.00041678		4055.17	-0.00367185
345.4	-0.01737713		875.39	-0.00151931		1405.39	0.00637591		1935.39	0.00006095		2465.38	-0.00606572		2995.38	0.00311826		3525.37	-0.0001092		4055.37	-0.00319397
345.6	-0.01768807		875.59	-0.00141771		1405.59	0.007159		1935.59	0.00013386		2465.58	-0.00625368		2995.58	0.00263589		3525.57	-0.00059379		4055.57	-0.00336125
345.8	-0.01788347		875.79	-0.00072237		1405.79	0.00750152		1935.79	0.0000622		2465.78	-0.00731994		2995.78	0.00209189		3525.77	0.00059778		4055.77	-0.00242367
346	-0.01789041		875.99	-0.00028721		1405.99	0.00813354		1935.99	0.00059175		2465.98	-0.00822284		2995.98	0.00153723		3525.97	0.0010833		4055.97	-0.00223328
346.2	-0.0175004		876.19	-0.00020266		1406.19	0.00811431		1936.19	0.00031303		2466.18	-0.00929138		2996.18	0.00032211		3526.17	0.00145583		4056.17	-0.00171713
346.4	-0.01605044		876.39	0.00109416		1406.39	0.00877585		1936.39	0.00042127		2466.38	-0.00881126		2996.38	-0.00165775		3526.37	0.00172438		4056.37	-0.00145554
346.6	-0.01555861		876.59	0.00150734		1406.59	0.00873934		1936.59	0.0017626		2466.58	-0.0090043		2996.58	-0.00208333		3526.57	0.0028189		4056.57	-0.00252033
346.8	-0.01446845		876.79	0.00247971		1406.79	0.00845562		1936.79	0.00117031		2466.78	-0.0082795		2996.78	-0.00217609		3526.77	0.00290971		4056.77	-0.00302107
347	-0.0149379		876.99	0.00263178		1406.99	0.00791098		1936.99	0.00112482		2466.98	-0.00856688		2996.98	-0.00273007		3526.97	0.00320306		4056.97	-0.00345115
347.2	-0.01333979		877.19	0.0022398		1407.19	0.00881602		1937.19	0.00066646		2467.18	-0.00903133		2997.18	-0.0033477		3527.17	0.00256923		4057.17	-0.00437605
347.4	-0.01382043		877.39	0.00259916		1407.39	0.00868415		1937.39	0.0002594		2467.38	-0.00977609		2997.38	-0.00335507		3527.37	0.00270504		4057.37	-0.00454753
347.6	-0.01285825		877.59	0.00256332		1407.59	0.00985712		1937.59	0.00001317		2467.58	-0.00973801		2997.58	-0.00380724		3527.57	0.00270596		4057.57	-0.00426493
347.8	-0.0128785		877.79	0.00240249		1407.79	0.01004505		1937.79	0.0002117		2467.78	-0.00945462		2997.78	-0.00398276		3527.77	0.00239446		4057.77	-0.00473288
348	-0.01332833		877.99	0.00180482		1407.99	0.0095685		1937.99	-0.00004696		2467.98	-0.00887992		2997.98	-0.00385582		3527.97	0.00189173		4057.97	-0.00503038
348.2	-0.01284353		878.19	0.00235359		1408.19	0.00915316		1938.19	0.00015263		2468.18	-0.00866177		2998.18	-0.00349726		3528.17	0.00153023		4058.17	-0.00516034
348.4	-0.01261542		878.39	0.00174683		1408.39	0.00915333		1938.39	0.00018731		2468.38	-0.00849952		2998.38	-0.0023987		3528.37	0.00125255		4058.37	-0.00521928
348.6	-0.01278006		878.59	0.00185375		1408.59	0.00919355		1938.59	0.00079153		2468.58	-0.00805183		2998.58	-0.00146079		3528.57	0.00150135		4058.57	-0.00525452
348.8	-0.01378965		878.79	0.0014583		1408.79	0.00831928		1938.79	0.00064538		2468.78	-0.00889119		2998.78	-0.00118695		3528.77	0.00147075		4058.77	-0.00546383
349	-0.01407124		878.99	0.00300105		1408.99	0.00831426		1938.99	0.00127708		2468.98	-0.00853871		2998.98	-0.00111922		3528.97	0.00032072		4058.97	-0.00564905
349.2	-0.01482245		879.19	0.00254484		1409.19	0.00778083		1939.19	0.00137051		2469.18	-0.00890017		2999.18	-0.00189334		3529.17	0.00003734		4059.17	-0.00567201
349.4	-0.0159408		879.39	0.00221944		1409.39	0.00796896		1939.39	0.00178282		2469.38	-0.00842492		2999.38	-0.00169117		3529.37	0.00030756		4059.37	-0.00505491
349.6	-0.01672167		879.59	0.00221411		1409.59	0.00752743		1939.59	0.00137393		2469.58	-0.00867778		2999.58	-0.00175457		3529.57	0.0007929		4059.57	-0.00549886
349.8	-0.01672674		879.79	0.00205193		1409.79	0.00678254		1939.79	0.00148981		2469.78	-0.00855645		2999.78	-0.00215837		3529.77	0.00183484		4059.77	-0.00503844
350	-0.01561173		879.99	0.00143662		1409.99	0.00675281		1939.99	0.00190672		2469.98	-0.00818711		2999.98	-0.00198145		3529.97	0.00169419		4059.97	-0.00473526
350.2	-0.01540497		880.19	0.00108517		1410.19	0.00679239		1940.19	0.00215851		2470.18	-0.00862365		3000.18	-0.00143267		3530.17	0.00178711		4060.17	-0.00445897
350.4	-0.01487556		880.39	0.00133988		1410.39	0.00645541		1940.39	0.00246529		2470.38	-0.00828254		3000.38	-0.00207688		3530.37	0.00231703		4060.37	-0.00431101
350.6	-0.01556799		880.59	0.00115609		1410.59	0.00630971		1940.59	0.00345667		2470.58	-0.00907866		3000.58	-0.00168959		3530.57	0.00315529		4060.57	-0.00410628
350.8	-0.01550373		880.79	0.00123555		1410.79	0.00663469		1940.79	0.00332378		2470.78	-0.00859953		3000.78	-0.00161576		3530.77	0.00318467		4060.77	-0.00392715
351	-0.01613512		880.99	0.00029839		1410.99	0.00622971		1940.99	0.00254876		2470.98	-0.00896353		3000.98	-0.00220477		3530.97	0.00364902		4060.97	-0.00396596
351.2	-0.01579679		881.19	-0.00005628		1411.19	0.00690971		1941.19	0.00207016		2471.18	-0.00968144		3001.18	-0.00204515		3531.17	0.00382702		4061.17	-0.00384325
351.4	-0.01572275		881.39	-0.0001294		1411.39	0.00721886		1941.39	0.00197118		2471.38	-0.00922951		3001.38	-0.00130701		3531.37	0.00427615		4061.37	-0.0033369
351.6	-0.01504675		881.59	0.00007043		1411.59	0.00862886		1941.59	0.00194053		2471.58	-0.00886267		3001.58	-0.0011165		3531.57	0.00509961		4061.57	-0.003152
351.8	-0.01541495		881.79	0.00021154		1411.79	0.00817813		1941.79	0.00199345		2471.78	-0.00918414		3001.78	-0.00020976		3531.77	0.00532937		4061.77	-0.0039552
352	-0.01612391		881.99	0.00052438		1411.99	0.00788642		1941.99	0.0018836		2471.98	-0.00991412		3001.98	-0.00012694		3531.97	0.00506446		4061.97	-0.00431294
352.2	-0.01551994		882.19	0.00090885		1412.19	0.00705787		1942.19	0.00210397		2472.18	-0.00959244		3002.18	-0.00008502		3532.17	0.00450536		4062.17	-0.00416964
352.4	-0.01565243		882.39	0.00105783		1412.39	0.00707284		1942.39	0.00160387		2472.38	-0.00916831		3002.38	0.00007169		3532.37	0.00457455		4062.37	-0.00482016
352.6	-0.01585866		882.59	0.0013588		1412.59	0.00783085		1942.59	0.0009546		2472.58	-0.00880131		3002.58	-0.00037428		3532.57	0.00414702		4062.57	-0.00439149
352.8	-0.01642174		882.79	0.00120476		1412.79	0.00799277		1942.79	0.00048888		2472.78	-0.00917697		3002.78	-0.0012282		3532.77	0.0028066		4062.77	-0.00449331
353	-0.01656606		882.99	0.00227595		1412.99	0.00787727		1942.99	0.00066196		2472.98	-0.00890592		3002.98	-0.00047319		3532.97	0.00222358		4062.97	-0.00474719
353.2	-0.01637933		883.19	0.00141092		1413.19	0.00684721		1943.19	0.00032135		2473.18	-0.0090311		3003.18	-0.00028098		3533.17	0.00217493		4063.17	-0.00512473
353.4	-0.0171522		883.39	0.0017824		1413.39	0.00639072		1943.39	0.00003943		2473.38	-0.00864667		3003.38	0.00052749		3533.37	0.00223013		4063.37	-0.0048522
353.6	-0.01685557		883.59	0.0017735		1413.59	0.00559697		1943.59	0.0002026		2473.58	-0.00789603		3003.58	0.00058237		3533.57	0.00280201		4063.57	-0.00568778
353.8	-0.0157894		883.79	0.00084459		1413.79	0.00469788		1943.79	0.00076656		2473.78	-0.00760262		3003.78	0.00052499		3533.77	0.00238098		4063.77	-0.00512703
354	-0.01558309		883.99	0.00092992		1413.99	0.00447618		1943.99	0.0011971		2473.98	-0.00707078		3003.98	0.00056879		3533.97	0.00217209		4063.97	-0.00426465
354.2	-0.01575935		884.19	0.00113183		1414.19	0.00479616		1944.19	0.00149622		2474.18	-0.00735		3004.18	0.00016755		3534.17	0.00193878		4064.17	-0.00418689
354.4	-0.01590466		884.39	0.00097796		1414.39	0.00468679		1944.39	0.00249528		2474.38	-0.00731622		3004.38	-0.00085193		3534.37	0.00177534		4064.37	-0.00407256
354.6	-0.01556928		884.59	0.00044207		1414.59	0.00519874		1944.59	0.00258745		2474.58	-0.00740932		3004.58	-0.00049022		3534.57	0.00170322		4064.57	-0.00270343
354.8	-0.01489949		884.79	0.00003667		1414.79	0.00501475		1944.79	0.00222147		2474.78	-0.00635374		3004.78	-0.00061115		3534.77	0.00180324		4064.77	-0.00228107
355	-0.01447716		884.99	0.00033395		1414.99	0.004985		1944.99	0.00208478		2474.98	-0.00650871		3004.98	-0.00040954		3534.97	0.0016884		4064.97	-0.00151243
355.2	-0.01400788		885.19	-0.00080105		1415.19	0.00556391		1945.19	0.00181167		2475.18	-0.00684057		3005.18	0.0006889		3535.17	0.00193159		4065.17	-0.00168534
355.4	-0.01331895		885.39	-0.0011388		1415.39	0.00583594		1945.39	0.00178253		2475.38	-0.00699952		3005.38	0.00105761		3535.37	0.00199525		4065.37	-0.00212328
355.6	-0.01342526		885.59	-0.00057601		1415.59	0.00613772		1945.59	0.0016215		2475.58	-0.00780368		3005.58	0.00070814		3535.57	0.00209167		4065.57	-0.00184378
355.8	-0.01311194		885.79	-0.00061244		1415.79	0.00582384		1945.79	0.00179485		2475.78	-0.00900556		3005.78	0.00075841		3535.77	0.00163301		4065.77	-0.00154394
356	-0.01305446		885.99	-0.00051017		1415.99	0.00557047		1945.99	0.00181792		2475.98	-0.00951317		3005.98	0.0003984		3535.97	0.00163279		4065.97	-0.00229162
356.2	-0.01262283		886.19	-0.00035976		1416.19	0.00569328		1946.19	0.00191727		2476.18	-0.00891513		3006.18	-0.00001527		3536.17	0.00165591		4066.17	-0.00266493
356.4	-0.0131661		886.39	-0.00041449		1416.39	0.00706435		1946.39	0.00122846		2476.38	-0.00941093		3006.38	-0.00026231		3536.37	0.00133156		4066.37	-0.0030289
356.6	-0.01304068		886.59	-0.00092983		1416.59	0.00809965		1946.59	0.00057987		2476.58	-0.00977033		3006.58	-0.00026607		3536.57	0.00164873		4066.57	-0.00330441
356.8	-0.01279448		886.79	-0.00128968		1416.79	0.00865296		1946.79	0.00105698		2476.78	-0.01028953		3006.78	0.00004362		3536.77	0.00169238		4066.77	-0.00327851
357	-0.0134724		886.99	-0.00072206		1416.99	0.00826995		1946.99	0.00108374		2476.98	-0.00978263		3006.98	0.00068956		3536.97	0.00203086		4066.97	-0.00350591
357.2	-0.01386331		887.19	-0.00072919		1417.19	0.00747758		1947.19	0.00201725		2477.18	-0.00984546		3007.18	0.00060591		3537.17	0.00248352		4067.17	-0.00315582
357.4	-0.01499001		887.39	-0.00009765		1417.39	0.00741423		1947.39	0.00212919		2477.38	-0.00916429		3007.38	0.00064411		3537.37	0.0032558		4067.37	-0.00333037
357.6	-0.01493058		887.59	0.00023029		1417.59	0.00645799		1947.59	0.00256066		2477.58	-0.00832038		3007.58	0.00041214		3537.57	0.00400853		4067.57	-0.00334585
357.8	-0.01504109		887.79	0.00100359		1417.79	0.00620576		1947.79	0.00302745		2477.78	-0.00880624		3007.78	-0.00030359		3537.77	0.00393338		4067.77	-0.00319739
358	-0.01495747		887.99	0.00211649		1417.99	0.00649883		1947.99	0.00371657		2477.98	-0.00718912		3007.98	-0.00018731		3537.97	0.00347743		4067.97	-0.00361379
358.2	-0.01466677		888.19	0.00274143		1418.19	0.00633927		1948.19	0.00336428		2478.18	-0.00747844		3008.18	-0.00002297		3538.17	0.00323226		4068.17	-0.00418851
358.4	-0.01465978		888.39	0.00300679		1418.39	0.00629545		1948.39	0.00342185		2478.38	-0.00682025		3008.38	0.00042933		3538.37	0.00227442		4068.37	-0.00398451
358.6	-0.01419427		888.59	0.00406107		1418.59	0.00633265		1948.59	0.00191264		2478.58	-0.00607876		3008.58	0.0004677		3538.57	0.00227273		4068.57	-0.00365257
358.8	-0.01381822		888.79	0.00373767		1418.79	0.00647621		1948.79	0.00108902		2478.78	-0.00560513		3008.78	-0.00035058		3538.77	0.00143097		4068.77	-0.00424804
359	-0.01316292		888.99	0.00363171		1418.99	0.00693007		1948.99	0.00108274		2478.98	-0.00542651		3008.98	-0.00012059		3538.97	0.00101669		4068.97	-0.0048339
359.2	-0.01288323		889.19	0.00325886		1419.19	0.00688897		1949.19	0.00014784		2479.18	-0.00516257		3009.18	0.00045358		3539.17	0.00125817		4069.17	-0.00581763
359.4	-0.01247524		889.39	0.00386158		1419.39	0.00688793		1949.39	-0.00029055		2479.38	-0.00462123		3009.38	-0.00025143		3539.37	0.00192419		4069.37	-0.00550709
359.6	-0.01278336		889.59	0.00443541		1419.59	0.0066458		1949.59	-0.0003893		2479.58	-0.00482397		3009.58	-0.00037793		3539.57	0.00201726		4069.57	-0.00468568
359.8	-0.01232637		889.79	0.00457216		1419.79	0.00773856		1949.79	0.00038433		2479.78	-0.00551538		3009.78	-0.00030815		3539.77	0.00152055		4069.77	-0.00586865
360	-0.0120643		889.99	0.00513458		1419.99	0.00763102		1949.99	0.00035644		2479.98	-0.00591488		3009.98	-0.00132057		3539.97	0.00158341		4069.97	-0.00663489
360.2	-0.01275092		890.19	0.00459062		1420.19	0.00853105		1950.19	0.00066571		2480.18	-0.0061008		3010.18	-0.00307883		3540.17	0.00191056		4070.17	-0.0065089
360.4	-0.01248503		890.39	0.00386913		1420.39	0.00856271		1950.39	-0.00010784		2480.38	-0.00666682		3010.38	-0.00341113		3540.37	0.00182022		4070.37	-0.00642267
360.6	-0.01273786		890.59	0.00283997		1420.59	0.00852759		1950.59	0.00028548		2480.58	-0.00708469		3010.58	-0.0032387		3540.57	0.00236036		4070.57	-0.00624382
360.8	-0.01265807		890.79	0.00198609		1420.79	0.0087477		1950.79	0.00039377		2480.78	-0.00673218		3010.78	-0.00285979		3540.77	0.00217622		4070.77	-0.00455776
361	-0.01294218		890.99	0.00102046		1420.99	0.00746864		1950.99	0.00061897		2480.98	-0.0069309		3010.98	-0.00272448		3540.97	0.00267034		4070.97	-0.00455357
361.2	-0.01326276		891.19	0.00030348		1421.19	0.00679283		1951.19	0.00096767		2481.18	-0.00703111		3011.18	-0.00218186		3541.17	0.00362773		4071.17	-0.00436933
361.4	-0.01350641		891.39	0.00041922		1421.39	0.00615233		1951.39	0.00074615		2481.38	-0.00726033		3011.38	-0.0017071		3541.37	0.00412902		4071.37	-0.00377936
361.6	-0.01273737		891.59	0.00059505		1421.59	0.00518909		1951.59	0.00091977		2481.58	-0.0069607		3011.58	-0.00131732		3541.57	0.00435715		4071.57	-0.00283636
361.8	-0.01289105		891.79	0.00094806		1421.79	0.0044322		1951.79	0.00106819		2481.78	-0.00685689		3011.78	-0.00108466		3541.77	0.00355874		4071.77	-0.00210191
362	-0.01309133		891.99	0.00029294		1421.99	0.00395544		1951.99	0.00046604		2481.98	-0.00595027		3011.98	-0.00077044		3541.97	0.00301447		4071.97	-0.00190772
362.2	-0.01269114		892.19	0.00036869		1422.19	0.00419275		1952.19	-0.00040413		2482.18	-0.00665164		3012.18	-0.00070101		3542.17	0.0031598		4072.17	-0.00117778
362.4	-0.01296257		892.39	-0.00022932		1422.39	0.00485111		1952.39	-0.00060931		2482.38	-0.00671712		3012.38	-0.00061433		3542.37	0.00281203		4072.37	-0.00128227
362.6	-0.01272824		892.59	0.00012644		1422.59	0.0046363		1952.59	-0.00123424		2482.58	-0.00718234		3012.58	-0.00217447		3542.57	0.00299429		4072.57	-0.00149684
362.8	-0.01194646		892.79	-0.00089628		1422.79	0.00602447		1952.79	-0.00197799		2482.78	-0.00739944		3012.78	-0.00272766		3542.77	0.00317409		4072.77	-0.00130357
363	-0.01192711		892.99	-0.00032441		1422.99	0.00644539		1952.99	-0.0022471		2482.98	-0.00707683		3012.98	-0.00219091		3542.97	0.00414706		4072.97	-0.00177918
363.2	-0.01262033		893.19	-0.00047955		1423.19	0.00631067		1953.19	-0.00271097		2483.18	-0.00753917		3013.18	-0.0025279		3543.17	0.00473753		4073.17	-0.0016345
363.4	-0.01269237		893.39	-0.00024438		1423.39	0.0069963		1953.39	-0.00332297		2483.38	-0.0081408		3013.38	-0.00323281		3543.37	0.00460715		4073.37	-0.00099946
363.6	-0.01358716		893.59	0.00018116		1423.59	0.00724013		1953.59	-0.00332102		2483.58	-0.00931883		3013.58	-0.003254		3543.57	0.00365786		4073.57	-0.00163282
363.8	-0.01372851		893.79	0.00065516		1423.79	0.00852467		1953.79	-0.00238046		2483.78	-0.00994621		3013.78	-0.00343668		3543.77	0.00333545		4073.77	-0.00276229
364	-0.01420784		893.99	0.001028		1423.99	0.00886434		1953.99	-0.00213395		2483.98	-0.01037617		3013.98	-0.00463487		3543.97	0.00314266		4073.97	-0.00203952
364.2	-0.01541985		894.19	0.001136		1424.19	0.00959365		1954.19	-0.00178129		2484.18	-0.01053346		3014.18	-0.00464607		3544.17	0.00299706		4074.17	-0.00268485
364.4	-0.01578388		894.39	0.00080052		1424.39	0.00950665		1954.39	-0.00109975		2484.38	-0.01025142		3014.38	-0.00409197		3544.37	0.00223301		4074.37	-0.00372344
364.6	-0.0162308		894.59	0.00069268		1424.59	0.00942908		1954.59	-0.00113745		2484.58	-0.01017001		3014.58	-0.00337901		3544.57	0.00251236		4074.57	-0.00462504
364.8	-0.015912		894.79	0.00028873		1424.79	0.00993471		1954.79	-0.00147572		2484.78	-0.00985294		3014.78	-0.001937		3544.77	0.00215648		4074.77	-0.00420169
365	-0.01623357		894.99	0.00060421		1424.99	0.00952757		1954.99	-0.00079556		2484.98	-0.01011971		3014.98	-0.00079047		3544.97	0.00244663		4074.97	-0.00521691
365.2	-0.01663857		895.19	0.00079699		1425.19	0.00971666		1955.19	-0.00103197		2485.18	-0.00963561		3015.18	0.00010128		3545.17	0.00234755		4075.17	-0.00503581
365.4	-0.01605045		895.39	0.00225587		1425.39	0.00879759		1955.39	-0.00124277		2485.38	-0.00917346		3015.38	0.00078149		3545.37	0.0023661		4075.37	-0.004226
365.6	-0.01586005		895.59	0.00311188		1425.59	0.0079808		1955.59	-0.00168079		2485.58	-0.00783414		3015.58	0.00124526		3545.57	0.00156453		4075.57	-0.00426652
365.8	-0.01616582		895.79	0.00384967		1425.79	0.00769862		1955.79	-0.00182385		2485.78	-0.00797854		3015.78	0.00232368		3545.77	0.0016207		4075.77	-0.0045731
366	-0.01597837		895.99	0.00293878		1425.99	0.00765977		1955.99	-0.00151346		2485.98	-0.00802694		3015.98	0.00280978		3545.97	0.00192056		4075.97	-0.00467294
366.2	-0.01480637		896.19	0.00338825		1426.19	0.00814335		1956.19	-0.00034993		2486.18	-0.00778279		3016.18	0.00395151		3546.17	0.00250518		4076.17	-0.00431895
366.4	-0.01448364		896.39	0.00276932		1426.39	0.00765433		1956.39	-0.00032359		2486.38	-0.00833651		3016.38	0.00395905		3546.37	0.00240033		4076.37	-0.00466809
366.6	-0.01330467		896.59	0.00311804		1426.59	0.00778289		1956.59	-0.00093981		2486.58	-0.00819511		3016.58	0.00251575		3546.57	0.00244624		4076.57	-0.00396429
366.8	-0.01358083		896.79	0.00284761		1426.79	0.00830763		1956.79	-0.00149673		2486.78	-0.00808036		3016.78	0.00334532		3546.77	0.00333921		4076.77	-0.00346825
367	-0.0130403		896.99	0.00194845		1426.99	0.00758964		1956.99	-0.00128713		2486.98	-0.00832571		3016.98	0.0030758		3546.97	0.00360822		4076.97	-0.00358395
367.2	-0.01329769		897.19	0.00189416		1427.19	0.00687449		1957.19	-0.00177621		2487.18	-0.00818346		3017.18	0.00174363		3547.17	0.00334732		4077.17	-0.00283049
367.4	-0.01285241		897.39	0.00197827		1427.39	0.00688997		1957.39	-0.00232462		2487.38	-0.00906849		3017.38	0.00121366		3547.37	0.00287		4077.37	-0.00242445
367.6	-0.01342767		897.59	0.00185865		1427.59	0.00691058		1957.59	-0.00234743		2487.58	-0.00908776		3017.58	0.00093546		3547.57	0.00322715		4077.57	-0.00274529
367.8	-0.01385906		897.79	0.00208395		1427.79	0.00751539		1957.79	-0.00179912		2487.78	-0.00832674		3017.78	-0.00050031		3547.77	0.00380982		4077.77	-0.00255632
368	-0.01356363		897.99	0.00220732		1427.99	0.00788188		1957.99	-0.00132977		2487.98	-0.00842481		3017.98	-0.00139951		3547.97	0.00338		4077.97	-0.00302122
368.2	-0.01386924		898.19	0.00201151		1428.19	0.00752533		1958.19	-0.00130982		2488.18	-0.00795442		3018.18	-0.00139578		3548.17	0.00334502		4078.17	-0.00454684
368.4	-0.01448402		898.39	0.00214076		1428.39	0.00784802		1958.39	-0.00087298		2488.38	-0.00745088		3018.38	-0.00173777		3548.37	0.0032171		4078.37	-0.00541542
368.6	-0.0142844		898.59	0.0022016		1428.59	0.00723579		1958.59	-0.00171409		2488.58	-0.00774334		3018.58	-0.00189149		3548.57	0.00399958		4078.57	-0.00554199
368.8	-0.01436262		898.79	0.00250718		1428.79	0.00821963		1958.79	-0.0009785		2488.78	-0.00776339		3018.78	-0.00159374		3548.77	0.00386167		4078.77	-0.00532837
369	-0.0147816		898.99	0.0027154		1428.99	0.00801995		1958.99	-0.00108919		2488.98	-0.00801103		3018.98	-0.00176225		3548.97	0.00375172		4078.97	-0.0052826
369.2	-0.0143074		899.19	0.00274194		1429.19	0.00774646		1959.19	-0.00167863		2489.18	-0.00755402		3019.18	-0.00232215		3549.17	0.00340397		4079.17	-0.00550886
369.4	-0.01395163		899.39	0.00346017		1429.39	0.00689511		1959.39	-0.00212641		2489.38	-0.00820951		3019.38	-0.00267642		3549.37	0.00262655		4079.37	-0.0060078
369.6	-0.01362851		899.59	0.00328498		1429.59	0.00737406		1959.59	-0.00213562		2489.58	-0.0088038		3019.58	-0.00218416		3549.57	0.00223452		4079.57	-0.00625661
369.8	-0.01233443		899.79	0.00243274		1429.79	0.00717977		1959.79	-0.00179187		2489.78	-0.00926709		3019.78	-0.00224774		3549.77	0.00278494		4079.77	-0.00601466
370	-0.01204407		899.99	0.00195791		1429.99	0.00729668		1959.99	-0.00063102		2489.98	-0.01006743		3019.98	-0.00265909		3549.97	0.00223111		4079.97	-0.00633719
370.2	-0.01129362		900.19	0.00195953		1430.19	0.00731352		1960.19	-0.00027216		2490.18	-0.00981432		3020.18	-0.00319044		3550.17	0.00250206		4080.17	-0.00612154
370.4	-0.01046001		900.39	0.00145795		1430.39	0.00617902		1960.39	-0.00068912		2490.38	-0.01019972		3020.38	-0.00465937		3550.37	0.00159014		4080.37	-0.00577526
370.6	-0.0104588		900.59	0.00102797		1430.59	0.00662173		1960.59	-0.00016111		2490.58	-0.01027825		3020.58	-0.00550061		3550.57	0.0013271		4080.57	-0.00534521
370.8	-0.01053153		900.79	0.00011519		1430.79	0.00593577		1960.79	0.00062654		2490.78	-0.01016832		3020.78	-0.00555604		3550.77	0.00119974		4080.77	-0.00494786
371	-0.00992289		900.99	-0.00116146		1430.99	0.00583622		1960.99	0.00070811		2490.98	-0.00952441		3020.98	-0.00642354		3550.97	0.00122101		4080.97	-0.00415435
371.2	-0.01045022		901.19	-0.0013233		1431.19	0.00504174		1961.19	0.00069503		2491.18	-0.00907284		3021.18	-0.00694516		3551.17	0.00082544		4081.17	-0.00379789
371.4	-0.01061133		901.39	-0.00232692		1431.39	0.00529268		1961.39	0.00063229		2491.38	-0.00933034		3021.38	-0.00606763		3551.37	0.00040565		4081.37	-0.00220977
371.6	-0.01094932		901.59	-0.00320086		1431.59	0.00531674		1961.59	-0.00009924		2491.58	-0.0087036		3021.58	-0.0060646		3551.57	0.00138047		4081.57	-0.00187802
371.8	-0.01107198		901.79	-0.00298243		1431.79	0.00533487		1961.79	0.00075062		2491.78	-0.00733216		3021.78	-0.00623259		3551.77	0.00212451		4081.77	-0.00144828
372	-0.01144062		901.99	-0.00366042		1431.99	0.00509045		1961.99	0.00171461		2491.98	-0.00772359		3021.98	-0.00542258		3551.97	0.00226965		4081.97	-0.00180846
372.2	-0.01340604		902.19	-0.00399946		1432.19	0.00453494		1962.19	0.00228761		2492.18	-0.00754654		3022.18	-0.00464717		3552.17	0.00179435		4082.17	-0.00200891
372.4	-0.01509651		902.39	-0.00403162		1432.39	0.00531027		1962.39	0.00274128		2492.38	-0.00738398		3022.38	-0.00369127		3552.37	0.00190149		4082.37	-0.00244253
372.6	-0.01607866		902.59	-0.0043171		1432.59	0.00494847		1962.59	0.00304678		2492.58	-0.00693145		3022.58	-0.00329165		3552.57	0.00208397		4082.57	-0.00183755
372.8	-0.01748424		902.79	-0.00421178		1432.79	0.0064854		1962.79	0.00362993		2492.78	-0.00619861		3022.78	-0.00213205		3552.77	0.00198016		4082.77	-0.0012886
373	-0.01746875		902.99	-0.0040641		1432.99	0.00657042		1962.99	0.00294972		2492.98	-0.00615174		3022.98	-0.00130104		3552.97	0.00173144		4082.97	-0.00166328
373.2	-0.01786012		903.19	-0.0036331		1433.19	0.00691574		1963.19	0.00302836		2493.18	-0.00566828		3023.18	-0.00162987		3553.17	0.00100191		4083.17	-0.00192972
373.4	-0.01778885		903.39	-0.00310462		1433.39	0.00762402		1963.39	0.00170918		2493.38	-0.00665595		3023.38	-0.00131341		3553.37	0.00085891		4083.37	-0.00182969
373.6	-0.01736579		903.59	-0.00264883		1433.59	0.00856665		1963.59	0.00207304		2493.58	-0.00634009		3023.58	-0.00072997		3553.57	0.00068486		4083.57	-0.00049614
373.8	-0.01684315		903.79	-0.00178276		1433.79	0.00849482		1963.79	0.00188471		2493.78	-0.00643819		3023.78	-0.00108645		3553.77	0.00105711		4083.77	-0.00060427
374	-0.01723104		903.99	-0.00076364		1433.99	0.00868062		1963.99	0.00155578		2493.98	-0.00716375		3023.98	-0.00124039		3553.97	0.00129589		4083.97	-0.00142913
374.2	-0.01685251		904.19	-0.00021851		1434.19	0.00770987		1964.19	0.0006888		2494.18	-0.00640601		3024.18	-0.0015409		3554.17	0.00147183		4084.17	-0.00066625
374.4	-0.01634458		904.39	-0.00013459		1434.39	0.00699839		1964.39	0.00056961		2494.38	-0.007226		3024.38	-0.00177265		3554.37	0.00118939		4084.37	-0.00072483
374.6	-0.01675156		904.59	-0.00024603		1434.59	0.00764366		1964.59	-0.0001677		2494.58	-0.00784716		3024.58	-0.00177219		3554.57	0.00101283		4084.57	-0.00139001
374.8	-0.01631356		904.79	-0.00075317		1434.79	0.00735617		1964.79	0.00018752		2494.78	-0.00771		3024.78	-0.00190581		3554.77	0.00097304		4084.77	-0.00073091
375	-0.01592194		904.99	-0.000679		1434.99	0.00708058		1964.99	-0.00035464		2494.98	-0.00841885		3024.98	-0.00156127		3554.97	0.00176037		4084.97	-0.00079397
375.2	-0.01579536		905.19	-0.00034497		1435.19	0.00638959		1965.19	-0.0004163		2495.18	-0.00848355		3025.18	-0.00122225		3555.17	0.00159253		4085.17	-0.0010144
375.4	-0.01553361		905.39	0.00021925		1435.39	0.00639393		1965.39	-0.00148164		2495.38	-0.0085344		3025.38	-0.0006183		3555.37	0.00128259		4085.37	0.00023228
375.6	-0.01593313		905.59	0.00021597		1435.59	0.00586759		1965.59	-0.00120096		2495.58	-0.00916168		3025.58	-0.00083481		3555.57	0.00175258		4085.57	-0.00064319
375.8	-0.01599022		905.79	0.00054161		1435.79	0.0062293		1965.79	0.00025004		2495.78	-0.00923553		3025.78	-0.00068441		3555.77	0.00175598		4085.77	-0.00092982
376	-0.0165155		905.99	0.00048563		1435.99	0.00630803		1965.99	0.00063835		2495.98	-0.00953829		3025.98	-0.00062323		3555.97	0.00117691		4085.97	-0.00142629
376.2	-0.01699156		906.19	0.00051444		1436.19	0.00531231		1966.19	0.00169933		2496.18	-0.00945226		3026.18	-0.00030574		3556.17	0.00137536		4086.17	-0.00190501
376.4	-0.017206		906.39	0.00051596		1436.39	0.0059039		1966.39	0.00219459		2496.38	-0.0090097		3026.38	-0.0002992		3556.37	0.00200874		4086.37	-0.00252777
376.6	-0.01737589		906.59	0.00111527		1436.59	0.00507095		1966.59	0.0027813		2496.58	-0.0082398		3026.58	-0.00103298		3556.57	0.00231085		4086.57	-0.00126266
376.8	-0.01732179		906.79	0.00152638		1436.79	0.00511214		1966.79	0.00232083		2496.78	-0.00829355		3026.78	-0.00137114		3556.77	0.00216732		4086.77	-0.00075592
377	-0.01694611		906.99	0.00178354		1436.99	0.00455924		1966.99	0.00191726		2496.98	-0.00882158		3026.98	-0.00185243		3556.97	0.00246819		4086.97	-0.00084888
377.2	-0.01702454		907.19	0.00157679		1437.19	0.00525913		1967.19	0.00175639		2497.18	-0.00880244		3027.18	-0.00181144		3557.17	0.00207708		4087.17	-0.000156
377.4	-0.01579678		907.39	0.0016377		1437.39	0.00563317		1967.39	0.00098419		2497.38	-0.00880048		3027.38	-0.00125827		3557.37	0.00258906		4087.37	0.00052683
377.6	-0.01548752		907.59	0.00196936		1437.59	0.00550398		1967.59	0.00123361		2497.58	-0.00834309		3027.58	-0.00081301		3557.57	0.002726		4087.57	0.00064621
377.8	-0.0150884		907.79	0.00155023		1437.79	0.00540099		1967.79	-0.00002305		2497.78	-0.00776851		3027.78	-0.00080341		3557.77	0.0031443		4087.77	-0.00017506
378	-0.01489444		907.99	0.00082329		1437.99	0.00519109		1967.99	-0.00120123		2497.98	-0.00729105		3027.98	-0.00068134		3557.97	0.00294243		4087.97	-0.00021025
378.2	-0.0147573		908.19	0.00058245		1438.19	0.00502469		1968.19	-0.00212001		2498.18	-0.00680302		3028.18	-0.00031951		3558.17	0.00282431		4088.17	0.00004574
378.4	-0.01417762		908.39	-0.00006947		1438.39	0.00534143		1968.39	-0.00270955		2498.38	-0.00721498		3028.38	-0.00015943		3558.37	0.00247673		4088.37	-0.00003742
378.6	-0.01403666		908.59	0.00013764		1438.59	0.00576349		1968.59	-0.0034239		2498.58	-0.00684736		3028.58	0.00044773		3558.57	0.00215327		4088.57	-0.00001226
378.8	-0.01304375		908.79	0.00043726		1438.79	0.00604949		1968.79	-0.00284119		2498.78	-0.00681235		3028.78	0.00128772		3558.77	0.002117		4088.77	0.00066213
379	-0.01237967		908.99	0.00146885		1438.99	0.00638422		1968.99	-0.00355579		2498.98	-0.00716009		3028.98	0.00232313		3558.97	0.00184013		4088.97	0.00065912
379.2	-0.01210752		909.19	0.00232175		1439.19	0.00702499		1969.19	-0.00350422		2499.18	-0.00669252		3029.18	0.00336995		3559.17	0.00093557		4089.17	0.00111521
379.4	-0.01139752		909.39	0.00314955		1439.39	0.00769865		1969.39	-0.00342457		2499.38	-0.00705243		3029.38	0.00402839		3559.37	0.0001986		4089.37	0.00179855
379.6	-0.01126301		909.59	0.00379903		1439.59	0.00838188		1969.59	-0.00270731		2499.58	-0.00736565		3029.58	0.0048248		3559.57	-0.00018459		4089.57	0.00175767
379.8	-0.01022088		909.79	0.00463897		1439.79	0.00941661		1969.79	-0.00232587		2499.78	-0.00730855		3029.78	0.00542331		3559.77	-0.00027712		4089.77	0.00239801
380	-0.01022088		909.99	0.00463897		1439.99	0.00941661		1969.98	-0.00232587		2499.98	-0.00730855		3029.97	0.00542331		3559.97	-0.00027712		4089.97	0.00239801
380.2	-0.00958248		910.19	0.00442932		1440.19	0.00882775		1970.18	-0.00235167		2500.18	-0.00696587		3030.17	0.00531514		3560.17	-0.00067977		4090.17	0.00251462
380.4	-0.00954715		910.39	0.00460474		1440.39	0.00879624		1970.38	-0.00175288		2500.38	-0.00670563		3030.37	0.00601597		3560.37	-0.00089257		4090.37	0.00256696
380.6	-0.00977793		910.59	0.00371452		1440.59	0.00878188		1970.58	-0.00144603		2500.58	-0.00557689		3030.57	0.0057132		3560.57	-0.00104768		4090.57	0.00264268
380.8	-0.00905948		910.79	0.00294666		1440.79	0.00882527		1970.78	-0.00075536		2500.78	-0.00492338		3030.77	0.00624768		3560.77	-0.00132375		4090.77	0.0019852
381	-0.00838108		910.99	0.00205425		1440.99	0.00848562		1970.98	-0.00073981		2500.98	-0.0051064		3030.97	0.00670657		3560.97	-0.00153583		4090.97	0.00189777
381.2	-0.00844227		911.19	0.00223857		1441.19	0.00830968		1971.18	-0.00101515		2501.18	-0.0050803		3031.17	0.00630211		3561.17	-0.00206782		4091.17	0.00139795
381.4	-0.00892898		911.39	0.00247574		1441.39	0.00753445		1971.38	-0.0011115		2501.38	-0.00542073		3031.37	0.00626773		3561.37	-0.00215049		4091.37	0.00087724
381.6	-0.00935691		911.59	0.00237349		1441.59	0.00713184		1971.58	-0.00115747		2501.58	-0.00613071		3031.57	0.0060971		3561.57	-0.00246738		4091.57	0.00072581
381.8	-0.00988937		911.79	0.00191194		1441.79	0.0071104		1971.78	-0.00127221		2501.78	-0.00667573		3031.77	0.00634147		3561.77	-0.0027436		4091.77	0.000858
382	-0.00974076		911.99	0.00147096		1441.99	0.00743675		1971.98	-0.00066028		2501.98	-0.00673972		3031.97	0.00608194		3561.97	-0.00305463		4091.97	0.00008504
382.2	-0.01105532		912.19	0.00131792		1442.19	0.00761527		1972.18	0.00030546		2502.18	-0.0061733		3032.17	0.00593704		3562.17	-0.00375239		4092.17	-0.00009238
382.4	-0.01172252		912.39	0.00064831		1442.39	0.00650343		1972.38	-0.00048713		2502.38	-0.00559604		3032.37	0.00584756		3562.37	-0.00397393		4092.37	0.00040564
382.6	-0.01302895		912.59	0.00076189		1442.59	0.00537242		1972.58	0.00037217		2502.58	-0.00591511		3032.57	0.00531125		3562.57	-0.00386894		4092.57	0.00031248
382.8	-0.01271297		912.79	0.0018872		1442.79	0.00572338		1972.78	0.00141101		2502.78	-0.0060346		3032.77	0.00458976		3562.77	-0.00425628		4092.77	0.00079555
383	-0.01280988		912.99	0.00136525		1442.99	0.00602847		1972.98	0.00236298		2502.98	-0.00578924		3032.97	0.00491376		3562.97	-0.00525057		4092.97	0.00124122
383.2	-0.01209811		913.19	0.00157192		1443.19	0.00661779		1973.18	0.00213126		2503.18	-0.00656523		3033.17	0.0054744		3563.17	-0.00492246		4093.17	0.0026731
383.4	-0.01134084		913.39	0.00126072		1443.39	0.00715831		1973.38	0.00262201		2503.38	-0.00641403		3033.37	0.00541005		3563.37	-0.00512917		4093.37	0.00271578
383.6	-0.0116299		913.59	0.00059527		1443.59	0.00736261		1973.58	0.00328696		2503.58	-0.00680633		3033.57	0.00605786		3563.57	-0.00450058		4093.57	0.00332831
383.8	-0.01142027		913.79	-0.00013704		1443.79	0.00715768		1973.78	0.00292371		2503.78	-0.00696783		3033.77	0.00655822		3563.77	-0.00422462		4093.77	0.00470578
384	-0.01141526		913.99	-0.00039292		1443.99	0.00738627		1973.98	0.0036735		2503.98	-0.0063317		3033.97	0.00726534		3563.97	-0.00311437		4093.97	0.00450782
384.2	-0.01060467		914.19	-0.00031951		1444.19	0.00777108		1974.18	0.00342015		2504.18	-0.00591974		3034.17	0.00712037		3564.17	-0.00324906		4094.17	0.00571043
384.4	-0.01068506		914.39	-0.00053559		1444.39	0.00808386		1974.38	0.0037796		2504.38	-0.0054562		3034.37	0.00715391		3564.37	-0.00245728		4094.37	0.0059717
384.6	-0.01029948		914.59	-0.00161197		1444.59	0.00779274		1974.58	0.00366784		2504.58	-0.00524224		3034.57	0.00610812		3564.57	-0.00162589		4094.57	0.00626004
384.8	-0.00909809		914.79	-0.00234956		1444.79	0.00713947		1974.78	0.00392461		2504.78	-0.00524173		3034.77	0.00599547		3564.77	-0.00117658		4094.77	0.00548386
385	-0.00887928		914.99	-0.00157607		1444.99	0.00647085		1974.98	0.00373037		2504.98	-0.00541202		3034.97	0.00548707		3564.97	-0.00072042		4094.97	0.00578593
385.2	-0.00884312		915.19	-0.00102022		1445.19	0.00665845		1975.18	0.00303397		2505.18	-0.00533643		3035.17	0.00435587		3565.17	-0.00031108		4095.17	0.00535851
385.4	-0.00812243		915.39	-0.00072272		1445.39	0.00627801		1975.38	0.0030252		2505.38	-0.00583278		3035.37	0.00392692		3565.37	0.00072644		4095.37	0.00508475
385.6	-0.00825471		915.59	-0.00067423		1445.59	0.00697203		1975.58	0.00280055		2505.58	-0.00635981		3035.57	0.00414405		3565.57	0.00068723		4095.57	0.00546021
385.8	-0.00878309		915.79	-0.00105156		1445.79	0.00729829		1975.78	0.00327215		2505.78	-0.0056515		3035.77	0.004427		3565.77	0.00033225		4095.77	0.00508676
386	-0.00886352		915.99	-0.00116336		1445.99	0.00805275		1975.98	0.00378622		2505.98	-0.00534243		3035.97	0.0039686		3565.97	0.00025095		4095.97	0.00348455
386.2	-0.01001785		916.19	-0.000817		1446.19	0.0083435		1976.18	0.00403732		2506.18	-0.0051904		3036.17	0.00407187		3566.17	-0.00032221		4096.17	0.00366323
386.4	-0.00987103		916.39	-0.00047243		1446.39	0.00753007		1976.38	0.00391182		2506.38	-0.00552611		3036.37	0.00382356		3566.37	-0.00099379		4096.37	0.00353575
386.6	-0.00969983		916.59	0.00034025		1446.59	0.00655921		1976.58	0.00480092		2506.58	-0.0067545		3036.57	0.00418774		3566.57	-0.0011298		4096.57	0.0030346
386.8	-0.00897583		916.79	0.00058058		1446.79	0.00648881		1976.78	0.0048026		2506.78	-0.00725791		3036.77	0.00449173		3566.77	-0.00158472		4096.77	0.00366589
387	-0.00873562		916.99	0.0005812		1446.99	0.00673026		1976.98	0.00532229		2506.98	-0.00770198		3036.97	0.00535756		3566.97	-0.00201053		4096.97	0.00376419
387.2	-0.00920736		917.19	0.00132329		1447.19	0.00762363		1977.18	0.00547703		2507.18	-0.00826511		3037.17	0.00533566		3567.17	-0.00285882		4097.17	0.00375442
387.4	-0.00934421		917.39	0.00151391		1447.39	0.00760866		1977.38	0.00569153		2507.38	-0.00831324		3037.37	0.00586533		3567.37	-0.00321743		4097.37	0.00372592
387.6	-0.010057		917.59	0.00117062		1447.59	0.00734642		1977.58	0.00560808		2507.58	-0.00849557		3037.57	0.00720553		3567.57	-0.0026596		4097.57	0.00373177
387.8	-0.01020716		917.79	0.00062179		1447.79	0.00729376		1977.78	0.00537361		2507.78	-0.00771054		3037.77	0.00808669		3567.77	-0.00276052		4097.77	0.00424751
388	-0.00954792		917.99	0.00088222		1447.99	0.00802091		1977.98	0.00443986		2507.98	-0.00672469		3037.97	0.00884358		3567.97	-0.00187157		4097.97	0.00361021
388.2	-0.01022365		918.19	0.0011637		1448.19	0.0077208		1978.18	0.00387036		2508.18	-0.00616732		3038.17	0.00831777		3568.17	-0.00171545		4098.17	0.00403027
388.4	-0.01095845		918.39	0.0007718		1448.39	0.00737659		1978.38	0.00374686		2508.38	-0.00579564		3038.37	0.00847564		3568.37	-0.00169339		4098.37	0.00380354
388.6	-0.01184369		918.59	0.00067244		1448.59	0.00793877		1978.58	0.00378376		2508.58	-0.00564923		3038.57	0.007778		3568.57	-0.00125571		4098.57	0.00399817
388.8	-0.01207396		918.79	0.00059024		1448.79	0.00785644		1978.78	0.00382085		2508.78	-0.0040016		3038.77	0.0074922		3568.77	-0.00193359		4098.77	0.00390878
389	-0.01182057		918.99	0.00140713		1448.99	0.00836334		1978.98	0.00405632		2508.98	-0.00298655		3038.97	0.00704182		3568.97	-0.00240538		4098.97	0.00512669
389.2	-0.01177338		919.19	-0.00010896		1449.19	0.00949937		1979.18	0.00360394		2509.18	-0.00228229		3039.17	0.00695106		3569.17	-0.00221171		4099.17	0.00451088
389.4	-0.01157775		919.39	0.00007816		1449.39	0.00967453		1979.38	0.00358831		2509.38	-0.00213182		3039.37	0.00618739		3569.37	-0.00251324		4099.37	0.00423905
389.6	-0.01250892		919.59	-0.00005144		1449.59	0.01021691		1979.58	0.0029475		2509.58	-0.00154171		3039.57	0.00687436		3569.57	-0.00282315		4099.57	0.00530992
389.8	-0.01280295		919.79	0.00002215		1449.79	0.01061017		1979.78	0.003136		2509.78	-0.00137364		3039.77	0.00711661		3569.77	-0.00222456		4099.77	0.00460862
390	-0.01225955		919.99	-0.00016197		1449.99	0.01152772		1979.98	0.00239369		2509.98	-0.00228852		3039.97	0.0064357		3569.97	-0.00110922		4099.97	0.00441412
390.2	-0.01207208		920.19	0.0001377		1450.19	0.01158368		1980.18	0.00230743		2510.18	-0.00281656		3040.17	0.00592764		3570.17	-0.00128636		4100.17	0.0041904
390.4	-0.01174867		920.39	0.00054408		1450.39	0.01076558		1980.38	0.00246077		2510.38	-0.00351064		3040.37	0.0061334		3570.37	-0.00073617		4100.37	0.00388681
390.6	-0.01149501		920.59	0.00068298		1450.59	0.0101265		1980.58	0.0025569		2510.58	-0.00528745		3040.57	0.00757284		3570.57	-0.00070534		4100.57	0.00422287
390.8	-0.01112542		920.79	0.0002896		1450.79	0.00964314		1980.78	0.00289024		2510.78	-0.00581397		3040.77	0.00699259		3570.77	-0.00086321		4100.77	0.00393196
391	-0.01070472		920.99	0.00033552		1450.99	0.01032392		1980.98	0.0034873		2510.98	-0.0070491		3040.97	0.00709108		3570.97	-0.00091661		4100.97	0.00414823
391.2	-0.01103053		921.19	0.00026506		1451.19	0.01013937		1981.18	0.00327578		2511.18	-0.00744444		3041.17	0.00653401		3571.17	-0.00115698		4101.17	0.00381223
391.4	-0.01038446		921.39	-0.00053118		1451.39	0.00956768		1981.38	0.00368299		2511.38	-0.00797857		3041.37	0.00723067		3571.37	-0.00079543		4101.37	0.00372257
391.6	-0.01043968		921.59	-0.00151688		1451.59	0.00868894		1981.58	0.00389948		2511.58	-0.00782962		3041.57	0.00723087		3571.57	-0.00080075		4101.57	0.00404743
391.8	-0.01060923		921.79	-0.00187927		1451.79	0.00821266		1981.78	0.00374241		2511.78	-0.00700706		3041.77	0.00672538		3571.77	-0.00070993		4101.77	0.00449329
392	-0.0103304		921.99	-0.00136015		1451.99	0.00698768		1981.98	0.00299568		2511.98	-0.00632285		3041.97	0.00661103		3571.97	-0.00039876		4101.97	0.00470294
392.2	-0.01060653		922.19	-0.00062184		1452.19	0.00654079		1982.18	0.00358598		2512.18	-0.00598608		3042.17	0.00678101		3572.17	-0.00101188		4102.17	0.00438344
392.4	-0.01171857		922.39	-0.00084808		1452.39	0.0071199		1982.38	0.00373573		2512.38	-0.0058835		3042.37	0.00673829		3572.37	-0.00181012		4102.37	0.00525666
392.6	-0.01119014		922.59	-0.000152		1452.59	0.00748845		1982.58	0.0038277		2512.58	-0.00476357		3042.57	0.00569442		3572.57	-0.00168892		4102.57	0.00546766
392.8	-0.01068852		922.79	-0.00054579		1452.79	0.00741185		1982.78	0.00414139		2512.78	-0.00340362		3042.77	0.00532588		3572.77	-0.00281524		4102.77	0.00533327
393	-0.01121924		922.99	-0.00061442		1452.99	0.0075773		1982.98	0.00465773		2512.98	-0.00268126		3042.97	0.00492157		3572.97	-0.00306737		4102.97	0.00498841
393.2	-0.01119199		923.19	-0.00188121		1453.19	0.00759609		1983.18	0.00428986		2513.18	-0.00255669		3043.17	0.00521455		3573.17	-0.00267459		4103.17	0.0039009
393.4	-0.0111872		923.39	-0.00110325		1453.39	0.00606761		1983.38	0.00317342		2513.38	-0.00220372		3043.37	0.00437913		3573.37	-0.00231783		4103.37	0.00445473
393.6	-0.01145716		923.59	-0.00101369		1453.59	0.00595132		1983.58	0.00357214		2513.58	-0.0020356		3043.57	0.00553712		3573.57	-0.00130366		4103.57	0.00515458
393.8	-0.01174115		923.79	-0.00053423		1453.79	0.00620083		1983.78	0.00327776		2513.78	-0.00273304		3043.77	0.00533037		3573.77	-0.00057251		4103.77	0.00371846
394	-0.01181783		923.99	-0.00061014		1453.99	0.0062449		1983.98	0.00249166		2513.98	-0.00290715		3043.97	0.00505498		3573.97	0.00009606		4103.97	0.00312502
394.2	-0.01203974		924.19	-0.00052195		1454.19	0.00607176		1984.18	0.00254563		2514.18	-0.00283389		3044.17	0.00502214		3574.17	-0.00045548		4104.17	0.00283411
394.4	-0.01217284		924.39	-0.00058532		1454.39	0.00621639		1984.38	0.00317919		2514.38	-0.00411767		3044.37	0.00635555		3574.37	0.00081106		4104.37	0.00328589
394.6	-0.01270392		924.59	-0.00058735		1454.59	0.00574557		1984.58	0.00316865		2514.58	-0.00519828		3044.57	0.0065311		3574.57	0.00068666		4104.57	0.00350558
394.8	-0.01294469		924.79	-0.00086146		1454.79	0.00587508		1984.78	0.00324595		2514.78	-0.00549018		3044.77	0.00563074		3574.77	0.0017722		4104.77	0.00328059
395	-0.01414126		924.99	-0.0017856		1454.99	0.00625768		1984.98	0.00317437		2514.98	-0.00600539		3044.97	0.00581009		3574.97	0.00200532		4104.97	0.00411273
395.2	-0.01559768		925.19	-0.00134391		1455.19	0.00579613		1985.18	0.00256214		2515.18	-0.00646849		3045.17	0.0059006		3575.17	0.00158283		4105.17	0.00470088
395.4	-0.01542968		925.39	-0.00097431		1455.39	0.00550033		1985.38	0.00281582		2515.38	-0.00596312		3045.37	0.00636845		3575.37	0.00135919		4105.37	0.00495419
395.6	-0.01597859		925.59	-0.00051717		1455.59	0.00463358		1985.58	0.00225394		2515.58	-0.00600394		3045.57	0.00651141		3575.57	0.00118682		4105.57	0.00595533
395.8	-0.01602065		925.79	-0.00008584		1455.79	0.00464997		1985.78	0.00191339		2515.78	-0.00575192		3045.77	0.00639211		3575.77	0.00185494		4105.77	0.00605123
396	-0.01601413		925.99	0.00055824		1455.99	0.00486841		1985.98	0.00118088		2515.98	-0.00532533		3045.97	0.00674782		3575.97	0.0012564		4105.97	0.00669157
396.2	-0.01598513		926.19	0.000631		1456.19	0.00597334		1986.18	0.0008673		2516.18	-0.00556158		3046.17	0.00692409		3576.17	0.0005286		4106.17	0.00641617
396.4	-0.01611034		926.39	0.00022073		1456.39	0.00679475		1986.38	0.00043567		2516.38	-0.00600377		3046.37	0.00624982		3576.37	0.00010084		4106.37	0.0074156
396.6	-0.01461794		926.59	0.00063643		1456.59	0.00737971		1986.58	-0.00016897		2516.58	-0.00574851		3046.57	0.00582492		3576.57	-0.00005988		4106.57	0.00674331
396.8	-0.01501324		926.79	0.00003575		1456.79	0.00778669		1986.78	-0.00016153		2516.78	-0.0059446		3046.77	0.0058053		3576.77	-0.00081627		4106.77	0.00632568
397	-0.01505703		926.99	-0.00077568		1456.99	0.00792825		1986.98	0.00008148		2516.98	-0.00612368		3046.97	0.00545058		3576.97	-0.00123286		4106.97	0.00607391
397.2	-0.01415812		927.19	-0.00184631		1457.19	0.00718183		1987.18	-0.00017827		2517.18	-0.006008		3047.17	0.00561823		3577.17	-0.00127258		4107.17	0.00589537
397.4	-0.01468986		927.39	-0.00227677		1457.39	0.00691784		1987.38	0.00015686		2517.38	-0.00567257		3047.37	0.00564648		3577.37	-0.00157733		4107.37	0.0053941
397.6	-0.01448599		927.59	-0.00251559		1457.59	0.00831346		1987.58	0.00152934		2517.58	-0.00603587		3047.57	0.00608828		3577.57	-0.00245977		4107.57	0.00506907
397.8	-0.01523638		927.79	-0.00148279		1457.79	0.00932294		1987.78	0.00135935		2517.78	-0.00692976		3047.77	0.00612718		3577.77	-0.00268515		4107.77	0.00440383
398	-0.01478915		927.99	-0.0017316		1457.99	0.00950427		1987.98	0.00160428		2517.98	-0.00671977		3047.97	0.007008		3577.97	-0.00230163		4107.97	0.00425327
398.2	-0.01528156		928.19	-0.0019481		1458.19	0.00932087		1988.18	0.00217595		2518.18	-0.00721549		3048.17	0.00711026		3578.17	-0.00260978		4108.17	0.00456758
398.4	-0.0159935		928.39	-0.00192542		1458.39	0.00982446		1988.38	0.00264271		2518.38	-0.00789586		3048.37	0.00779004		3578.37	-0.00153183		4108.37	0.00415938
398.6	-0.01648738		928.59	-0.00181902		1458.59	0.00871683		1988.58	0.00245155		2518.58	-0.0077756		3048.57	0.0078307		3578.57	-0.00151452		4108.57	0.00391754
398.8	-0.01632514		928.79	-0.00160817		1458.79	0.00858774		1988.78	0.00282274		2518.78	-0.00767202		3048.77	0.00761449		3578.77	-0.00107011		4108.77	0.00400461
399	-0.01640203		928.99	-0.00130598		1458.99	0.00839995		1988.98	0.00282777		2518.98	-0.00681514		3048.97	0.00843936		3578.97	-0.00211334		4108.97	0.00344464
399.2	-0.01551346		929.19	-0.00026141		1459.19	0.00765676		1989.18	0.00304451		2519.18	-0.00749524		3049.17	0.00932066		3579.17	-0.00225557		4109.17	0.00345996
399.4	-0.01465876		929.39	0.00036209		1459.39	0.00758777		1989.38	0.00295004		2519.38	-0.0066186		3049.37	0.00941026		3579.37	-0.00185687		4109.37	0.0026517
399.6	-0.01450058		929.59	-0.00006405		1459.59	0.00629513		1989.58	0.002197		2519.58	-0.0062265		3049.57	0.00948784		3579.57	-0.00173626		4109.57	0.00259462
399.8	-0.01420914		929.79	-0.00031089		1459.79	0.0061453		1989.78	0.00172293		2519.78	-0.00493704		3049.77	0.0093755		3579.77	-0.00198471		4109.77	0.00281523
400	-0.01375946		929.99	-0.00029413		1459.99	0.00601963		1989.98	0.00094691		2519.98	-0.00468592		3049.97	0.00858796		3579.97	-0.00262387		4109.97	0.0024699
400.2	-0.01294625		930.19	-0.00028637		1460.19	0.00585203		1990.18	0.00036316		2520.18	-0.00490011		3050.17	0.0079414		3580.17	-0.00295257		4110.17	0.00199451
400.4	-0.01156809		930.39	-0.00020139		1460.39	0.00514504		1990.38	0.00022746		2520.38	-0.00501998		3050.37	0.00687393		3580.37	-0.00330433		4110.37	0.00188658
400.6	-0.01106993		930.59	-0.00031159		1460.59	0.00510908		1990.58	0.00016014		2520.58	-0.00548337		3050.57	0.00615698		3580.57	-0.00390344		4110.57	0.0017512
400.8	-0.01104077		930.79	-0.00033421		1460.79	0.00480132		1990.78	0.00120408		2520.78	-0.00459008		3050.77	0.0057919		3580.77	-0.00475092		4110.77	0.00239144
401	-0.01111139		930.99	-0.00085863		1460.99	0.00477951		1990.98	0.00177136		2520.98	-0.00449175		3050.97	0.0051427		3580.97	-0.00464462		4110.97	0.00220079
401.2	-0.01146254		931.19	-0.00089546		1461.19	0.00491088		1991.18	0.00263292		2521.18	-0.00413987		3051.17	0.00506459		3581.17	-0.00442105		4111.17	0.00217953
401.4	-0.01172309		931.39	-0.0015295		1461.39	0.00587922		1991.38	0.00365867		2521.38	-0.00493014		3051.37	0.00453503		3581.37	-0.00488589		4111.37	0.00237034
401.6	-0.01244187		931.59	-0.00107396		1461.59	0.00614584		1991.58	0.0041487		2521.58	-0.0047555		3051.57	0.00421661		3581.57	-0.00449332		4111.57	0.00319582
401.8	-0.0126454		931.79	-0.00143696		1461.79	0.00606375		1991.78	0.0045376		2521.78	-0.00592031		3051.77	0.00442627		3581.77	-0.00395733		4111.77	0.0032784
402	-0.01233402		931.99	-0.00311974		1461.99	0.00539795		1991.98	0.00421423		2521.98	-0.00544048		3051.97	0.00428584		3581.97	-0.00390285		4111.97	0.00354016
402.2	-0.01370286		932.19	-0.00414284		1462.19	0.00544305		1992.18	0.00444607		2522.18	-0.00632937		3052.17	0.0041505		3582.17	-0.00346044		4112.17	0.00426019
402.4	-0.01438819		932.39	-0.00457361		1462.39	0.00566703		1992.38	0.00404424		2522.38	-0.00646513		3052.37	0.00385266		3582.37	-0.00334254		4112.37	0.00538506
402.6	-0.01489166		932.59	-0.00495135		1462.59	0.00558102		1992.58	0.00430343		2522.58	-0.00729641		3052.57	0.00452026		3582.57	-0.00327756		4112.57	0.00585776
402.8	-0.01430489		932.79	-0.00513039		1462.79	0.00651158		1992.78	0.00461781		2522.78	-0.00736207		3052.77	0.00409633		3582.77	-0.00306601		4112.77	0.00516031
403	-0.01443226		932.99	-0.00577339		1462.99	0.00737681		1992.98	0.00456676		2522.98	-0.00699642		3052.97	0.00463211		3582.97	-0.00349434		4112.97	0.00467793
403.2	-0.01401193		933.19	-0.00632388		1463.19	0.00764844		1993.18	0.00365488		2523.18	-0.00816855		3053.17	0.00461455		3583.17	-0.00374428		4113.17	0.00465061
403.4	-0.01416741		933.39	-0.00633459		1463.39	0.00891356		1993.38	0.00310248		2523.38	-0.00683865		3053.37	0.00386816		3583.37	-0.00374495		4113.37	0.00447411
403.6	-0.01410486		933.59	-0.00710835		1463.59	0.00841535		1993.58	0.00208806		2523.58	-0.00598998		3053.57	0.00356873		3583.57	-0.00477692		4113.57	0.00484122
403.8	-0.01341982		933.79	-0.00649446		1463.79	0.00863838		1993.78	0.00181641		2523.78	-0.00495913		3053.77	0.00305719		3583.77	-0.00529244		4113.77	0.00542162
404	-0.0133818		933.99	-0.00548697		1463.99	0.00861217		1993.98	0.00097195		2523.98	-0.00563648		3053.97	0.00250583		3583.97	-0.00538183		4113.97	0.00426385
404.2	-0.01298514		934.19	-0.00478999		1464.19	0.00795501		1994.18	0.00043222		2524.18	-0.0054868		3054.17	0.00279019		3584.17	-0.00591369		4114.17	0.00402806
404.4	-0.01201341		934.39	-0.00381998		1464.39	0.00720846		1994.38	0.00074788		2524.38	-0.00574701		3054.37	0.00227557		3584.37	-0.00681249		4114.37	0.00371426
404.6	-0.01119039		934.59	-0.00228563		1464.59	0.0066387		1994.58	0.00080425		2524.58	-0.00532326		3054.57	0.00223301		3584.57	-0.00708752		4114.57	0.00407182
404.8	-0.01069912		934.79	-0.00063287		1464.79	0.00614819		1994.78	0.00203253		2524.78	-0.00518486		3054.77	0.00142709		3584.77	-0.00767317		4114.77	0.00485762
405	-0.01111305		934.99	0.00006584		1464.99	0.00606208		1994.98	0.00239532		2524.98	-0.00594301		3054.97	0.00097472		3584.97	-0.00643602		4114.97	0.00412472
405.2	-0.01010437		935.19	0.00006338		1465.19	0.00575855		1995.18	0.00305087		2525.18	-0.00586967		3055.17	0.00080494		3585.17	-0.00567767		4115.17	0.00408067
405.4	-0.01038737		935.39	0.00062222		1465.39	0.00512725		1995.38	0.00285266		2525.38	-0.00613874		3055.37	0.00090553		3585.37	-0.00503846		4115.37	0.00382913
405.6	-0.01135929		935.59	0.00109919		1465.59	0.00400373		1995.58	0.00271652		2525.58	-0.00613213		3055.57	0.00122057		3585.57	-0.004173		4115.57	0.00385876
405.8	-0.01107255		935.79	0.00118171		1465.79	0.00286123		1995.78	0.00235714		2525.78	-0.00719478		3055.77	0.00226008		3585.77	-0.00475606		4115.77	0.00461676
406	-0.01205158		935.99	0.00048632		1465.99	0.00148454		1995.98	0.00201874		2525.98	-0.00781735		3055.97	0.00234139		3585.97	-0.00360961		4115.97	0.00549182
406.2	-0.01315548		936.19	0.00011713		1466.19	0.00149293		1996.18	0.00140296		2526.18	-0.00874231		3056.17	0.00241943		3586.17	-0.00317987		4116.17	0.0058998
406.4	-0.01434681		936.39	0.00078221		1466.39	0.00129705		1996.38	0.00085501		2526.38	-0.00918165		3056.37	0.00219737		3586.37	-0.00306114		4116.37	0.00677103
406.6	-0.01503609		936.59	0.00005697		1466.59	0.00252416		1996.58	0.00141485		2526.58	-0.00977753		3056.57	0.00253346		3586.57	-0.00295998		4116.57	0.00588061
406.8	-0.01478984		936.79	-0.00067222		1466.79	0.00356629		1996.78	0.00127946		2526.78	-0.01024662		3056.77	0.0016528		3586.77	-0.00279711		4116.77	0.00621779
407	-0.01532434		936.99	-0.00140397		1466.99	0.00457376		1996.98	0.00109746		2526.98	-0.01073827		3056.97	0.00182552		3586.97	-0.00340636		4116.97	0.00624623
407.2	-0.01498676		937.19	-0.00231081		1467.19	0.0052168		1997.18	0.00017156		2527.18	-0.01069451		3057.17	0.00109105		3587.17	-0.00332824		4117.17	0.0051523
407.4	-0.01589406		937.39	-0.00252347		1467.39	0.00662016		1997.38	0.00123205		2527.38	-0.0100743		3057.37	0.00099602		3587.37	-0.00328233		4117.37	0.0049819
407.6	-0.01650885		937.59	-0.00303699		1467.59	0.00561047		1997.58	0.00115883		2527.58	-0.00972198		3057.57	0.0012764		3587.57	-0.00381669		4117.57	0.00493778
407.8	-0.0169664		937.79	-0.00310297		1467.79	0.00542803		1997.78	0.00214927		2527.78	-0.00909202		3057.77	0.0013486		3587.77	-0.00364526		4117.77	0.00428395
408	-0.01794119		937.99	-0.00338417		1467.99	0.00502875		1997.98	0.00277409		2527.98	-0.00926964		3057.97	0.00217526		3587.97	-0.00481411		4117.97	0.00327936
408.2	-0.01754805		938.19	-0.00333538		1468.19	0.00448228		1998.18	0.00357013		2528.18	-0.00876334		3058.17	0.00276962		3588.17	-0.00570276		4118.17	0.00354491
408.4	-0.01738344		938.39	-0.0027855		1468.39	0.00490993		1998.38	0.00467529		2528.38	-0.00858287		3058.37	0.00190059		3588.37	-0.00712551		4118.37	0.00364473
408.6	-0.01680458		938.59	-0.00241484		1468.59	0.00471974		1998.58	0.00546257		2528.58	-0.00842318		3058.57	0.00219504		3588.57	-0.00749022		4118.57	0.00392181
408.8	-0.01682595		938.79	-0.00313824		1468.79	0.00479464		1998.78	0.00563251		2528.78	-0.0088316		3058.77	0.00217358		3588.77	-0.00876785		4118.77	0.00392414
409	-0.01683884		938.99	-0.00352689		1468.99	0.00400837		1998.98	0.00459859		2528.98	-0.00864403		3058.97	0.00298703		3588.97	-0.00797551		4118.97	0.00287119
409.2	-0.01612989		939.19	-0.00365764		1469.19	0.00360111		1999.18	0.00351316		2529.18	-0.00846477		3059.17	0.00342704		3589.17	-0.00803913		4119.17	0.00250999
409.4	-0.01722711		939.39	-0.00435738		1469.39	0.0032096		1999.38	0.00242886		2529.38	-0.00896395		3059.37	0.0038326		3589.37	-0.00818647		4119.37	0.00254219
409.6	-0.01733824		939.59	-0.00509811		1469.59	0.00170405		1999.58	0.00189173		2529.58	-0.00964861		3059.57	0.00411313		3589.57	-0.00840265		4119.57	0.00245404
409.8	-0.01715716		939.79	-0.00564321		1469.79	0.00071597		1999.78	0.00074587		2529.78	-0.009286		3059.77	0.00469681		3589.77	-0.00800809		4119.77	0.00320251
410	-0.01722708		939.99	-0.00709943		1469.99	0.00033968		1999.98	-0.00058579		2529.98	-0.00978011		3059.97	0.00427068		3589.97	-0.00684808		4119.97	0.00352324
410.2	-0.01711823		940.19	-0.00696997		1470.19	0.001535		2000.18	-0.001504		2530.18	-0.00963358		3060.17	0.00338028		3590.17	-0.00705599		4120.17	0.00334399
410.4	-0.01717233		940.39	-0.00723045		1470.39	0.00222811		2000.38	-0.00182483		2530.38	-0.01036023		3060.37	0.00312806		3590.37	-0.00624598		4120.37	0.00391344
410.6	-0.01722426		940.59	-0.00791945		1470.59	0.00269425		2000.58	-0.0016547		2530.58	-0.01041427		3060.57	0.00337033		3590.57	-0.00625555		4120.57	0.00304151
410.8	-0.01655763		940.79	-0.0083287		1470.79	0.00253831		2000.78	-0.00297144		2530.78	-0.01082336		3060.77	0.00358149		3590.77	-0.00509752		4120.77	0.00319827
411	-0.01543575		940.99	-0.00810672		1470.99	0.00299632		2000.98	-0.0027317		2530.98	-0.01171014		3060.97	0.0035416		3590.97	-0.00459504		4120.97	0.00188764
411.2	-0.01511747		941.19	-0.0080397		1471.19	0.0024717		2001.18	-0.00268675		2531.18	-0.01209229		3061.17	0.00273259		3591.17	-0.00366436		4121.17	0.00120905
411.4	-0.01529777		941.39	-0.00765795		1471.39	0.0028312		2001.38	-0.0015704		2531.38	-0.01177181		3061.37	0.00248877		3591.37	-0.00367188		4121.37	0.00132276
411.6	-0.01530308		941.59	-0.00705627		1471.59	0.00227361		2001.58	-0.00186564		2531.58	-0.01159246		3061.57	0.00266077		3591.57	-0.00289105		4121.57	0.0019406
411.8	-0.0151671		941.79	-0.00664152		1471.79	0.00304431		2001.78	-0.00059842		2531.78	-0.01126502		3061.77	0.00230402		3591.77	-0.0019029		4121.77	0.0030543
412	-0.01576534		941.99	-0.00576434		1471.99	0.00277342		2001.98	-0.00036596		2531.98	-0.01070899		3061.97	0.00237115		3591.97	-0.00251143		4121.97	0.00370172
412.2	-0.01624665		942.19	-0.0047247		1472.19	0.00258153		2002.18	-0.00036371		2532.18	-0.01048197		3062.17	0.00159139		3592.17	-0.0023377		4122.17	0.00450406
412.4	-0.01550031		942.39	-0.00426559		1472.39	0.00310624		2002.38	-0.00024567		2532.38	-0.00977203		3062.37	0.00047996		3592.37	-0.00347046		4122.37	0.00512887
412.6	-0.01495905		942.59	-0.00406102		1472.59	0.0022336		2002.58	-0.00030844		2532.58	-0.00921635		3062.57	0.00085595		3592.57	-0.00295265		4122.57	0.0061658
412.8	-0.01527716		942.79	-0.00368661		1472.79	0.00157441		2002.78	-0.0010284		2532.78	-0.00867175		3062.77	0.00028381		3592.77	-0.00368636		4122.77	0.00607663
413	-0.01552759		942.99	-0.00349812		1472.99	0.00149247		2002.98	-0.00079559		2532.98	-0.00920932		3062.97	-0.00008889		3592.97	-0.00320978		4122.97	0.00574029
413.2	-0.01642431		943.19	-0.00412605		1473.19	0.00109504		2003.18	-0.00090147		2533.18	-0.00933137		3063.17	-0.00043685		3593.17	-0.00382953		4123.17	0.0056691
413.4	-0.0172426		943.39	-0.0045514		1473.39	0.00072332		2003.38	-0.00090678		2533.38	-0.00938875		3063.37	-0.00061846		3593.37	-0.00449317		4123.37	0.00502632
413.6	-0.01781847		943.59	-0.00379122		1473.59	0.00064094		2003.58	-0.00077001		2533.58	-0.00893326		3063.57	-0.00063651		3593.57	-0.00440194		4123.57	0.00363876
413.8	-0.01828813		943.79	-0.00385566		1473.79	0.00120199		2003.78	-0.00122819		2533.78	-0.00813691		3063.77	-0.00128569		3593.77	-0.00422214		4123.77	0.00311588
414	-0.01833914		943.99	-0.00367683		1473.99	0.00146276		2003.98	-0.0014342		2533.98	-0.00843125		3063.97	-0.00098787		3593.97	-0.00455118		4123.97	0.00295615
414.2	-0.01805124		944.19	-0.00310402		1474.19	0.00121118		2004.18	-0.00057316		2534.18	-0.00855537		3064.17	-0.00105063		3594.17	-0.00479004		4124.17	0.00196225
414.4	-0.0177323		944.39	-0.00308289		1474.39	0.00084973		2004.38	-0.00140249		2534.38	-0.00901708		3064.37	-0.0001097		3594.37	-0.0042312		4124.37	0.00097023
414.6	-0.01783372		944.59	-0.00309521		1474.59	0.00064342		2004.58	-0.00110965		2534.58	-0.00912733		3064.57	0.00073991		3594.57	-0.00497516		4124.57	0.00008474
414.8	-0.0164404		944.79	-0.00284265		1474.79	0.00083842		2004.78	-0.00103752		2534.78	-0.01010723		3064.77	0.00209287		3594.77	-0.00515909		4124.77	-0.00069136
415	-0.01498187		944.99	-0.00251279		1474.99	0.00160693		2004.98	-0.00014319		2534.98	-0.01107439		3064.97	0.00174724		3594.97	-0.00554297		4124.97	-0.00161866
415.2	-0.01523578		945.19	-0.00329167		1475.19	0.00167933		2005.18	-0.00008489		2535.18	-0.01062958		3065.17	0.00155144		3595.17	-0.00597212		4125.17	-0.00131834
415.4	-0.0152778		945.39	-0.00350104		1475.39	0.00206251		2005.38	-0.0004881		2535.38	-0.01029599		3065.37	0.00200635		3595.37	-0.00676573		4125.37	-0.00098816
415.6	-0.01575447		945.59	-0.00360121		1475.59	0.00245529		2005.58	-0.00091908		2535.58	-0.01087479		3065.57	0.00270917		3595.57	-0.006398		4125.57	-0.00027555
415.8	-0.01599031		945.79	-0.00373196		1475.79	0.00330771		2005.78	-0.00073049		2535.78	-0.01042344		3065.77	0.00268444		3595.77	-0.00638017		4125.77	0.00091367
416	-0.01668158		945.99	-0.00384767		1475.99	0.00350491		2005.98	-0.0018032		2535.98	-0.01013553		3065.97	0.00216282		3595.97	-0.00779772		4125.97	0.00107511
416.2	-0.01643346		946.19	-0.00464287		1476.19	0.00414937		2006.18	-0.00163392		2536.18	-0.00955645		3066.17	0.0012868		3596.17	-0.00820496		4126.17	0.00166362
416.4	-0.01590065		946.39	-0.00441133		1476.39	0.0050182		2006.38	-0.00122227		2536.38	-0.00888333		3066.37	0.00101934		3596.37	-0.00868824		4126.37	0.00338282
416.6	-0.01677831		946.59	-0.00457683		1476.59	0.00495198		2006.58	-0.00105016		2536.58	-0.00940231		3066.57	0.0013059		3596.57	-0.00800187		4126.57	0.0043054
416.8	-0.01802258		946.79	-0.00531853		1476.79	0.00469186		2006.78	-0.00106982		2536.78	-0.00924484		3066.77	0.00107663		3596.77	-0.00886227		4126.77	0.00375437
417	-0.01890834		946.99	-0.00607781		1476.99	0.00432545		2006.98	-0.00034458		2536.98	-0.00932806		3066.97	0.00143594		3596.97	-0.00840242		4126.97	0.0039651
417.2	-0.01924878		947.19	-0.00663593		1477.19	0.00353022		2007.18	-0.00018172		2537.18	-0.008838		3067.17	0.00209542		3597.17	-0.00809209		4127.17	0.00394914
417.4	-0.01968413		947.39	-0.0058376		1477.39	0.00393506		2007.38	0.00011334		2537.38	-0.00841223		3067.37	0.00186771		3597.37	-0.00810072		4127.37	0.00356241
417.6	-0.01920111		947.59	-0.00616023		1477.59	0.00383019		2007.58	0.00094083		2537.58	-0.00816854		3067.57	0.00313553		3597.57	-0.00683646		4127.57	0.00328528
417.8	-0.0187615		947.79	-0.0065228		1477.79	0.00336772		2007.78	0.00156217		2537.78	-0.00809178		3067.77	0.00339083		3597.77	-0.00609826		4127.77	0.00349119
418	-0.01817625		947.99	-0.00612419		1477.99	0.00240745		2007.98	0.00217803		2537.98	-0.0078897		3067.97	0.00465061		3597.97	-0.00536707		4127.97	0.00404714
418.2	-0.01830568		948.19	-0.00601833		1478.19	0.00169564		2008.18	0.00287311		2538.18	-0.00802352		3068.17	0.00460431		3598.17	-0.00493446		4128.17	0.00307751
418.4	-0.0178276		948.39	-0.00554597		1478.39	0.00176785		2008.38	0.00241062		2538.38	-0.00843168		3068.37	0.00450123		3598.37	-0.00332779		4128.37	0.00271982
418.6	-0.01801822		948.59	-0.00629063		1478.59	0.00160036		2008.58	0.00353999		2538.58	-0.00879607		3068.57	0.00411239		3598.57	-0.00387425		4128.57	0.00196381
418.8	-0.01768112		948.79	-0.00605124		1478.79	0.00179501		2008.78	0.00436505		2538.78	-0.0089634		3068.77	0.004749		3598.77	-0.00361383		4128.77	0.00143858
419	-0.01747086		948.99	-0.00615159		1478.99	0.00187541		2008.98	0.0041416		2538.98	-0.00863629		3068.97	0.00367299		3598.97	-0.00324093		4128.97	0.00130922
419.2	-0.01782784		949.19	-0.00686338		1479.19	0.00199071		2009.18	0.00419442		2539.18	-0.00892908		3069.17	0.00257304		3599.17	-0.00284942		4129.17	0.00218679
419.4	-0.01812487		949.39	-0.00585769		1479.39	0.00194948		2009.38	0.00357417		2539.38	-0.00854349		3069.37	0.00188786		3599.37	-0.00284756		4129.37	0.00249089
419.6	-0.01804351		949.59	-0.00561764		1479.59	0.00264123		2009.58	0.00311954		2539.58	-0.00841069		3069.57	0.00042638		3599.57	-0.0027605		4129.57	0.00354232
419.8	-0.01770296		949.79	-0.00471049		1479.79	0.00314073		2009.78	0.00239862		2539.78	-0.00867326		3069.77	-0.00019609		3599.77	-0.00234799		4129.77	0.00442273
420	-0.01754601		949.99	-0.00497892		1479.99	0.00344929		2009.98	0.00194702		2539.98	-0.00835313		3069.97	-0.0016199		3599.97	-0.00292434		4129.97	0.00424277
420.2	-0.01738405		950.19	-0.00440008		1480.19	0.0038911		2010.18	0.00180903		2540.18	-0.00832955		3070.17	-0.00249682		3600.17	-0.00271227		4130.17	0.00459568
420.4	-0.01731731		950.39	-0.00355848		1480.39	0.00468411		2010.38	0.00084141		2540.38	-0.00893293		3070.37	-0.00232907		3600.37	-0.00332932		4130.37	0.00531298
420.6	-0.01750893		950.59	-0.00314824		1480.59	0.00434843		2010.58	0.00032782		2540.58	-0.0096749		3070.57	-0.00125966		3600.57	-0.00362219		4130.57	0.00485504
420.8	-0.0182034		950.79	-0.00281377		1480.79	0.0033008		2010.78	0.00008707		2540.78	-0.00937806		3070.77	-0.00167918		3600.77	-0.00400317		4130.77	0.00551928
421	-0.01841894		950.99	-0.00250741		1480.99	0.00287434		2010.98	0.00009764		2540.98	-0.00959307		3070.97	-0.00187415		3600.97	-0.0041516		4130.97	0.00544991
421.2	-0.01777725		951.19	-0.00272091		1481.19	0.00275904		2011.18	-0.00011843		2541.18	-0.00993827		3071.17	-0.00156827		3601.17	-0.00406466		4131.17	0.00596947
421.4	-0.01824906		951.39	-0.00246956		1481.39	0.00265434		2011.38	-0.00013707		2541.38	-0.01075034		3071.37	-0.00167104		3601.37	-0.005205		4131.37	0.00578674
421.6	-0.01756849		951.59	-0.0029999		1481.59	0.0028817		2011.58	-0.00023348		2541.58	-0.01126471		3071.57	-0.00055641		3601.57	-0.00532146		4131.57	0.00544931
421.8	-0.01762322		951.79	-0.00314298		1481.79	0.00274046		2011.78	-0.00018888		2541.78	-0.01160846		3071.77	-0.00069586		3601.77	-0.00538541		4131.77	0.00544486
422	-0.01772426		951.99	-0.00327915		1481.99	0.00239652		2011.98	-0.00049543		2541.98	-0.01193588		3071.97	-0.00048585		3601.97	-0.00517453		4131.97	0.00482972
422.2	-0.01788041		952.19	-0.00369198		1482.19	0.00292432		2012.18	-0.00035768		2542.18	-0.01221871		3072.17	-0.00067597		3602.17	-0.00565525		4132.17	0.00394529
422.4	-0.01775799		952.39	-0.00423051		1482.39	0.00350168		2012.38	-0.00144182		2542.38	-0.01270828		3072.37	-0.00079798		3602.37	-0.00474896		4132.37	0.00323827
422.6	-0.01812341		952.59	-0.00564717		1482.59	0.00425211		2012.58	-0.00082549		2542.58	-0.01258106		3072.57	0.00016287		3602.57	-0.00550647		4132.57	0.0022808
422.8	-0.01873286		952.79	-0.00565513		1482.79	0.00437879		2012.78	-0.0003838		2542.78	-0.01243755		3072.77	0.00105371		3602.77	-0.00572777		4132.77	0.00261942
423	-0.01909126		952.99	-0.00634834		1482.99	0.00463658		2012.98	-0.00033623		2542.98	-0.0119462		3072.97	0.00088914		3602.97	-0.00560544		4132.97	0.00185654
423.2	-0.01931907		953.19	-0.00663237		1483.19	0.00540096		2013.18	-0.00044654		2543.18	-0.01202082		3073.17	0.0005732		3603.17	-0.00541286		4133.17	0.00177248
423.4	-0.01949223		953.39	-0.00616773		1483.39	0.00507235		2013.38	-0.00127753		2543.38	-0.01120863		3073.37	0.00083688		3603.37	-0.00606378		4133.37	0.00158434
423.6	-0.0189798		953.59	-0.00691446		1483.59	0.00522556		2013.58	-0.00206974		2543.58	-0.01135769		3073.57	0.00097052		3603.57	-0.00637928		4133.57	0.0018111
423.8	-0.01901697		953.79	-0.00695172		1483.79	0.00485197		2013.78	-0.00217368		2543.78	-0.01172654		3073.77	0.00119721		3603.77	-0.00576836		4133.77	0.00141228
424	-0.01884568		953.99	-0.00720778		1483.99	0.00552843		2013.98	-0.00191101		2543.98	-0.01058876		3073.97	0.00162443		3603.97	-0.00727971		4133.97	0.00093423
424.2	-0.01922722		954.19	-0.00618865		1484.19	0.00526996		2014.18	-0.00300326		2544.18	-0.01021845		3074.17	0.00204208		3604.17	-0.00743628		4134.17	0.00073023
424.4	-0.01926697		954.39	-0.00568253		1484.39	0.00471274		2014.38	-0.00291249		2544.38	-0.00974363		3074.37	0.00177467		3604.37	-0.00725985		4134.37	0.00099157
424.6	-0.01972816		954.59	-0.0045567		1484.59	0.00357802		2014.58	-0.00254136		2544.58	-0.00954461		3074.57	0.00221294		3604.57	-0.0074338		4134.57	0.00182796
424.8	-0.02043995		954.79	-0.00404002		1484.79	0.00295401		2014.78	-0.00294054		2544.78	-0.00874422		3074.77	0.00038996		3604.77	-0.00687119		4134.77	0.0021844
425	-0.02072833		954.99	-0.00366591		1484.99	0.00317036		2014.98	-0.00317963		2544.98	-0.00848207		3074.97	0.00010249		3604.97	-0.0070838		4134.97	0.00194139
425.2	-0.02053129		955.19	-0.00317485		1485.19	0.00358524		2015.18	-0.00312923		2545.18	-0.00901097		3075.17	0.00021412		3605.17	-0.00617318		4135.17	0.00279787
425.4	-0.02078389		955.39	-0.00225947		1485.39	0.00353482		2015.38	-0.00253494		2545.38	-0.00894303		3075.37	0.00027435		3605.37	-0.00613853		4135.37	0.0033011
425.6	-0.02035852		955.59	-0.00157428		1485.59	0.00364675		2015.58	-0.0020534		2545.58	-0.00922792		3075.57	0.00066053		3605.57	-0.00557078		4135.57	0.00321384
425.8	-0.01986835		955.79	-0.00156554		1485.79	0.00248396		2015.78	-0.00165886		2545.78	-0.0093493		3075.77	0.00065052		3605.77	-0.00496483		4135.77	0.00314555
426	-0.01967969		955.99	-0.00144371		1485.99	0.00284067		2015.98	-0.001771		2545.98	-0.00937371		3075.97	0.00043478		3605.97	-0.0040509		4135.97	0.00256596
426.2	-0.01936203		956.19	-0.0011317		1486.19	0.00349479		2016.18	-0.00184356		2546.18	-0.00935242		3076.17	0.00089658		3606.17	-0.00409532		4136.17	0.00256446
426.4	-0.01919562		956.39	-0.00100257		1486.39	0.00439011		2016.38	-0.0021		2546.38	-0.0097584		3076.37	0.00082899		3606.37	-0.00343112		4136.37	0.0016732
426.6	-0.01922247		956.59	-0.00139816		1486.59	0.00432634		2016.58	-0.0007727		2546.58	-0.00979925		3076.57	0.00181905		3606.57	-0.00377218		4136.57	0.00193602
426.8	-0.01963262		956.79	-0.00160498		1486.79	0.00413		2016.78	-0.00061741		2546.78	-0.009899		3076.77	0.00143886		3606.77	-0.00407672		4136.77	0.00138421
427	-0.01954029		956.99	-0.00185681		1486.99	0.00434798		2016.98	-0.00043761		2546.98	-0.01040266		3076.97	0.00127664		3606.97	-0.00415928		4136.97	0.00083328
427.2	-0.01961589		957.19	-0.00235342		1487.19	0.00426774		2017.18	-0.00150488		2547.18	-0.01103756		3077.17	0.00160526		3607.17	-0.00389298		4137.17	0.0010346
427.4	-0.01941494		957.39	-0.00322032		1487.39	0.00343257		2017.38	-0.00197758		2547.38	-0.01129821		3077.37	0.00111349		3607.37	-0.00451757		4137.37	0.00012144
427.6	-0.01913916		957.59	-0.00440534		1487.59	0.00368413		2017.58	-0.00253319		2547.58	-0.01118637		3077.57	0.00093121		3607.57	-0.00494287		4137.57	0.00006721
427.8	-0.01948943		957.79	-0.00473262		1487.79	0.00385752		2017.78	-0.00284118		2547.78	-0.01177281		3077.77	0.00020143		3607.77	-0.00520808		4137.77	0.00026697
428	-0.0193711		957.99	-0.00558792		1487.99	0.00451364		2017.98	-0.00295052		2547.98	-0.01170259		3077.97	0.00049728		3607.97	-0.00601435		4137.97	-0.00022845
428.2	-0.02007073		958.19	-0.00570179		1488.19	0.00330109		2018.18	-0.00342213		2548.18	-0.01101684		3078.17	-0.00039924		3608.17	-0.00591081		4138.17	-0.00083274
428.4	-0.01999414		958.39	-0.00590921		1488.39	0.00283533		2018.38	-0.00369644		2548.38	-0.01114926		3078.37	-0.00087312		3608.37	-0.00624655		4138.37	-0.00031048
428.6	-0.02042779		958.59	-0.00571688		1488.59	0.00223801		2018.58	-0.00444133		2548.58	-0.01128584		3078.57	-0.00032644		3608.57	-0.00686401		4138.57	0.00008623
428.8	-0.02044496		958.79	-0.0064725		1488.79	0.00217513		2018.78	-0.00528022		2548.78	-0.01114068		3078.77	-0.00071328		3608.77	-0.00685654		4138.77	-0.00038838
429	-0.02076134		958.99	-0.00617079		1488.99	0.00192566		2018.98	-0.00524557		2548.98	-0.01101608		3078.97	-0.00002077		3608.97	-0.00718059		4138.97	0.00060799
429.2	-0.02096023		959.19	-0.00616095		1489.19	0.00171039		2019.18	-0.00471684		2549.18	-0.01125847		3079.17	-0.00018825		3609.17	-0.00647219		4139.17	0.00128101
429.4	-0.02149992		959.39	-0.00573032		1489.39	0.00107152		2019.38	-0.00399927		2549.38	-0.01136096		3079.37	0.00009165		3609.37	-0.00693031		4139.37	0.00176369
429.6	-0.02166446		959.59	-0.00637408		1489.59	0.00071002		2019.58	-0.00458535		2549.58	-0.01175061		3079.57	-0.00016225		3609.57	-0.00723956		4139.57	0.00139446
429.8	-0.02164527		959.79	-0.00696595		1489.79	0.00033174		2019.78	-0.00492425		2549.78	-0.01118252		3079.77	-0.00070803		3609.77	-0.00740706		4139.77	0.00184273
430	-0.02116262		959.99	-0.00709582		1489.99	0.00080497		2019.98	-0.00451915		2549.98	-0.01138522		3079.97	-0.00129886		3609.97	-0.007813		4139.97	0.00113983
430.2	-0.02074613		960.19	-0.00708653		1490.19	0.00085136		2020.18	-0.00440543		2550.18	-0.01188195		3080.17	-0.00060419		3610.17	-0.00856237		4140.17	0.00123581
430.4	-0.02057763		960.39	-0.00686089		1490.39	0.00087958		2020.38	-0.0039809		2550.38	-0.01198012		3080.37	-0.00111795		3610.37	-0.00772796		4140.37	0.00149523
430.6	-0.02069932		960.59	-0.00783431		1490.59	0.00065946		2020.58	-0.00323345		2550.58	-0.01138446		3080.57	-0.00103146		3610.57	-0.00725198		4140.57	0.00241116
430.8	-0.02032331		960.79	-0.00792368		1490.79	0.00029927		2020.78	-0.0034351		2550.78	-0.01162513		3080.77	-0.00125394		3610.77	-0.00646638		4140.77	0.0024194
431	-0.021272		960.99	-0.00757964		1490.99	-0.00068402		2020.98	-0.0028742		2550.98	-0.01220355		3080.97	-0.00140777		3610.97	-0.00605163		4140.97	0.00297041
431.2	-0.0219377		961.19	-0.00829821		1491.19	-0.00085435		2021.18	-0.00274719		2551.18	-0.01235053		3081.17	-0.00137968		3611.17	-0.00509594		4141.17	0.00304648
431.4	-0.02197218		961.39	-0.00812247		1491.39	-0.00050027		2021.38	-0.00188421		2551.38	-0.01223776		3081.37	-0.00191399		3611.37	-0.0059293		4141.37	0.00200358
431.6	-0.02111713		961.59	-0.00840913		1491.59	-0.00016653		2021.58	-0.00224493		2551.58	-0.01234618		3081.57	-0.00227653		3611.57	-0.00556607		4141.57	0.00231265
431.8	-0.02116741		961.79	-0.00757637		1491.79	0.00048079		2021.78	-0.00236293		2551.78	-0.01308976		3081.77	-0.00319587		3611.77	-0.00561114		4141.77	0.00198583
432	-0.02108678		961.99	-0.00740357		1491.99	0.0006053		2021.98	-0.00173653		2551.98	-0.01245609		3081.97	-0.00310014		3611.97	-0.00478262		4141.97	0.00195491
432.2	-0.02099824		962.19	-0.0061435		1492.19	-0.00001252		2022.18	-0.0014536		2552.18	-0.01150479		3082.17	-0.00304366		3612.17	-0.00535142		4142.17	0.00179576
432.4	-0.02044277		962.39	-0.00563797		1492.39	-0.00005315		2022.38	-0.00271228		2552.38	-0.01142188		3082.37	-0.00305717		3612.37	-0.00532963		4142.37	0.00192131
432.6	-0.02044076		962.59	-0.00474606		1492.59	0.00016784		2022.58	-0.00287457		2552.58	-0.01092159		3082.57	-0.00282218		3612.57	-0.00477932		4142.57	0.00135078
432.8	-0.0201181		962.79	-0.00525574		1492.79	0.00173317		2022.78	-0.00307754		2552.78	-0.01065197		3082.77	-0.0022443		3612.77	-0.00522962		4142.77	0.0007758
433	-0.02042967		962.99	-0.00466696		1492.99	0.00215339		2022.98	-0.00285604		2552.98	-0.01014804		3082.97	-0.00210178		3612.97	-0.00485102		4142.97	0.00139606
433.2	-0.02001299		963.19	-0.00551808		1493.19	0.00349213		2023.18	-0.00237213		2553.18	-0.01057134		3083.17	-0.00217222		3613.17	-0.00497125		4143.17	0.00120986
433.4	-0.02015713		963.39	-0.00605226		1493.39	0.00438116		2023.38	-0.00310983		2553.38	-0.01129361		3083.37	-0.00240141		3613.37	-0.00579469		4143.37	0.00055709
433.6	-0.01964924		963.59	-0.00696735		1493.59	0.00462954		2023.58	-0.00400342		2553.58	-0.01122646		3083.57	-0.00253211		3613.57	-0.00577476		4143.57	0.00080886
433.8	-0.01941922		963.79	-0.00715275		1493.79	0.00509779		2023.78	-0.00446094		2553.78	-0.01148697		3083.77	-0.00350783		3613.77	-0.00611546		4143.77	0.00007306
434	-0.01858733		963.99	-0.0068695		1493.99	0.00529119		2023.98	-0.00405909		2553.98	-0.01178623		3083.97	-0.00322862		3613.97	-0.00644609		4143.97	-0.00140331
434.2	-0.01855853		964.19	-0.00710451		1494.19	0.00543332		2024.18	-0.00477352		2554.18	-0.01195789		3084.17	-0.00248663		3614.17	-0.00624731		4144.17	-0.00140189
434.4	-0.01891111		964.39	-0.00752095		1494.39	0.00508652		2024.38	-0.00539951		2554.38	-0.0119128		3084.37	-0.00223946		3614.37	-0.00521837		4144.37	-0.00138348
434.6	-0.01899007		964.59	-0.00778933		1494.59	0.00464148		2024.58	-0.00610957		2554.58	-0.0109738		3084.57	-0.00192677		3614.57	-0.0057753		4144.57	-0.00147764
434.8	-0.019859		964.79	-0.00753912		1494.79	0.00346613		2024.78	-0.00638502		2554.78	-0.01166184		3084.77	-0.00215537		3614.77	-0.00540838		4144.77	-0.00203942
435	-0.02106077		964.99	-0.0074722		1494.99	0.00252805		2024.98	-0.00562854		2554.98	-0.01133987		3084.97	-0.0020773		3614.97	-0.00585874		4144.97	-0.00176046
435.2	-0.02145341		965.19	-0.00794457		1495.19	0.00129157		2025.18	-0.00572189		2555.18	-0.01116457		3085.17	-0.00248309		3615.17	-0.00638087		4145.17	-0.0012623
435.4	-0.02088471		965.39	-0.00753289		1495.39	0.00064615		2025.38	-0.00513149		2555.38	-0.01067785		3085.37	-0.00250147		3615.37	-0.00747773		4145.37	-0.00154174
435.6	-0.02035856		965.59	-0.00681389		1495.59	-0.00041539		2025.58	-0.00560022		2555.58	-0.01056983		3085.57	-0.00260382		3615.57	-0.00748601		4145.57	-0.00031487
435.8	-0.02074526		965.79	-0.00586502		1495.79	-0.00084688		2025.78	-0.00533896		2555.78	-0.01020965		3085.77	-0.00241583		3615.77	-0.00739289		4145.77	0.00027263
436	-0.02095917		965.99	-0.00531765		1495.99	-0.00113723		2025.98	-0.00473467		2555.98	-0.00960125		3085.97	-0.00173134		3615.97	-0.00663574		4145.97	0.00097155
436.2	-0.02092497		966.19	-0.00413965		1496.19	-0.00140056		2026.18	-0.00470355		2556.18	-0.00999305		3086.17	-0.00111183		3616.17	-0.00693961		4146.17	0.0007911
436.4	-0.0211005		966.39	-0.00339041		1496.39	-0.00098201		2026.38	-0.00412782		2556.38	-0.01028418		3086.37	-0.00058502		3616.37	-0.00611375		4146.37	0.00049475
436.6	-0.02199283		966.59	-0.00368733		1496.59	-0.00011257		2026.58	-0.0034536		2556.58	-0.01089642		3086.57	0.00069607		3616.57	-0.00610391		4146.57	0.00083817
436.8	-0.02195835		966.79	-0.00494182		1496.79	-0.00002062		2026.78	-0.00302385		2556.78	-0.0118663		3086.77	0.00159959		3616.77	-0.0060681		4146.77	0.00127914
437	-0.02231099		966.99	-0.0055979		1496.99	-0.00059641		2026.98	-0.00119938		2556.98	-0.01238994		3086.97	0.00209438		3616.97	-0.00563648		4146.97	0.00209766
437.2	-0.02260794		967.19	-0.00723662		1497.19	-0.00014904		2027.18	-0.0008305		2557.18	-0.01319137		3087.17	0.0020838		3617.17	-0.00564238		4147.17	0.00189426
437.4	-0.02277931		967.39	-0.0074753		1497.39	0.00021729		2027.38	-0.00053818		2557.38	-0.01358118		3087.37	0.00173319		3617.37	-0.00529516		4147.37	0.00150754
437.6	-0.02218056		967.59	-0.00745305		1497.59	0.00006488		2027.58	-0.00021296		2557.58	-0.01420215		3087.57	0.00230515		3617.57	-0.0050186		4147.57	0.00073496
437.8	-0.02179123		967.79	-0.00773575		1497.79	0.00025697		2027.78	-0.0001528		2557.78	-0.0150973		3087.77	0.00155051		3617.77	-0.00497878		4147.77	0.00020256
438	-0.02132572		967.99	-0.00821807		1497.99	-0.00002184		2027.98	0.00030464		2557.98	-0.01480688		3087.97	0.00162784		3617.97	-0.00502898		4147.97	-0.0007104
438.2	-0.02181517		968.19	-0.00915551		1498.19	0.00028357		2028.18	-0.00046351		2558.18	-0.01449084		3088.17	0.00166523		3618.17	-0.00588873		4148.17	-0.00162224
438.4	-0.02216737		968.39	-0.00904211		1498.39	0.00097282		2028.38	-0.00059795		2558.38	-0.01432474		3088.37	0.00167816		3618.37	-0.00556244		4148.37	-0.00294326
438.6	-0.02296461		968.59	-0.00832288		1498.59	0.00115722		2028.58	-0.00083406		2558.58	-0.0138531		3088.57	0.00099021		3618.57	-0.00681799		4148.57	-0.00292629
438.8	-0.0234665		968.79	-0.00917257		1498.79	0.00094459		2028.78	-0.00048034		2558.78	-0.01425032		3088.77	0.00025516		3618.77	-0.00713411		4148.77	-0.00367405
439	-0.0232227		968.99	-0.00898549		1498.99	0.00088691		2028.98	-0.00079254		2558.98	-0.01275107		3088.97	-0.00016728		3618.97	-0.00769373		4148.97	-0.003533
439.2	-0.02331658		969.19	-0.00855275		1499.19	0.00046632		2029.18	-0.00090482		2559.18	-0.01224691		3089.17	-0.0014078		3619.17	-0.00843036		4149.17	-0.00367762
439.4	-0.02181683		969.39	-0.00735831		1499.39	0.00074697		2029.38	-0.00047863		2559.38	-0.01122817		3089.37	-0.00164014		3619.37	-0.00897866		4149.37	-0.00320544
439.6	-0.02177794		969.59	-0.00638878		1499.59	0.00148929		2029.58	-0.00154381		2559.58	-0.01039108		3089.57	-0.00186715		3619.57	-0.00835284		4149.57	-0.00249428
439.8	-0.02099608		969.79	-0.00598177		1499.79	0.00171753		2029.78	-0.00152984		2559.78	-0.00915434		3089.77	-0.00239916		3619.77	-0.00842856		4149.77	-0.00237349
440	-0.02151073		969.99	-0.00550881		1499.99	0.00186523		2029.98	-0.00180225		2559.98	-0.00991216		3089.97	-0.00210816		3619.97	-0.00825061		4149.97	-0.00240976
440.2	-0.02180594		970.19	-0.00539066		1500.19	0.00170596		2030.18	-0.00242133		2560.18	-0.01018191		3090.17	-0.00221439		3620.17	-0.00784471		4150.17	-0.0015955
440.4	-0.02226765		970.39	-0.00504341		1500.39	0.00136666		2030.38	-0.00250445		2560.38	-0.01052181		3090.37	-0.00220123		3620.37	-0.00730786		4150.37	-0.00132014
440.6	-0.02223139		970.59	-0.00594209		1500.59	0.00092764		2030.58	-0.00357835		2560.58	-0.01042643		3090.57	-0.00198093		3620.57	-0.0072724		4150.57	-0.00075096
440.8	-0.02214523		970.79	-0.00631135		1500.79	-0.00002732		2030.78	-0.00324875		2560.78	-0.01078418		3090.77	-0.00169059		3620.77	-0.00694918		4150.77	-0.00037097
441	-0.02253579		970.99	-0.00575236		1500.99	-0.00100454		2030.98	-0.00269359		2560.98	-0.01155463		3090.97	-0.00150141		3620.97	-0.00704637		4150.97	0.0003089
441.2	-0.02239063		971.19	-0.00585737		1501.19	-0.00121864		2031.18	-0.00346833		2561.18	-0.01211199		3091.17	-0.00227707		3621.17	-0.0066565		4151.17	0.00059375
441.4	-0.0224322		971.39	-0.0055705		1501.39	-0.00145795		2031.38	-0.00344273		2561.38	-0.0128052		3091.37	-0.00148384		3621.37	-0.00623268		4151.37	0.00073819
441.6	-0.02189534		971.59	-0.00557934		1501.59	-0.00219971		2031.58	-0.00344903		2561.58	-0.01364556		3091.57	-0.00116554		3621.57	-0.00629148		4151.57	0.00126786
441.8	-0.0219391		971.79	-0.00569723		1501.79	-0.00245546		2031.78	-0.00450899		2561.78	-0.01339959		3091.77	-0.00167924		3621.77	-0.00648377		4151.77	0.00241772
442	-0.02255411		971.99	-0.00623298		1501.99	-0.00242196		2031.98	-0.00455579		2561.98	-0.01349137		3091.97	-0.00192264		3621.97	-0.0069679		4151.97	0.00181956
442.2	-0.02281755		972.19	-0.00635221		1502.19	-0.0014339		2032.18	-0.00445643		2562.18	-0.01381157		3092.17	-0.00118842		3622.17	-0.00803678		4152.17	0.00134625
442.4	-0.02320689		972.39	-0.00623301		1502.39	-0.0011926		2032.38	-0.00410692		2562.38	-0.01424513		3092.37	-0.00107515		3622.37	-0.00758935		4152.37	0.00076673
442.6	-0.02455981		972.59	-0.00650772		1502.59	-0.00110631		2032.58	-0.00438186		2562.58	-0.01476842		3092.57	-0.00105244		3622.57	-0.0081633		4152.57	0.0012483
442.8	-0.02495454		972.79	-0.00734003		1502.79	-0.00086352		2032.78	-0.00442553		2562.78	-0.0146577		3092.77	-0.00031108		3622.77	-0.00782391		4152.77	-0.00001453
443	-0.02488725		972.99	-0.0067249		1502.99	-0.00061341		2032.98	-0.00407947		2562.98	-0.01359376		3092.97	-0.00022846		3622.97	-0.00745253		4152.97	-0.00018974
443.2	-0.02529497		973.19	-0.00707073		1503.19	-0.00032001		2033.18	-0.00356068		2563.18	-0.01345481		3093.17	-0.00031006		3623.17	-0.00713189		4153.17	0.00023567
443.4	-0.02489674		973.39	-0.00774591		1503.39	0.0002551		2033.38	-0.00335255		2563.38	-0.01320698		3093.37	-0.00006053		3623.37	-0.00662243		4153.37	0.00075662
443.6	-0.0247755		973.59	-0.00798462		1503.59	0.00176983		2033.58	-0.00323606		2563.58	-0.01305231		3093.57	0.00034222		3623.57	-0.00595025		4153.57	0.00059505
443.8	-0.02408085		973.79	-0.0083228		1503.79	0.00213361		2033.78	-0.00335434		2563.78	-0.01273232		3093.77	0.00029019		3623.77	-0.00595612		4153.77	0.00076482
444	-0.02401343		973.99	-0.00914947		1503.99	0.002174		2033.98	-0.00393918		2563.98	-0.01369204		3093.97	0.00019021		3623.97	-0.00489319		4153.97	0.00056045
444.2	-0.02314085		974.19	-0.00970122		1504.19	0.00239186		2034.18	-0.00402135		2564.18	-0.0136847		3094.17	-0.00103658		3624.17	-0.00469924		4154.17	0.00046548
444.4	-0.02218355		974.39	-0.0090717		1504.39	0.00272183		2034.38	-0.00368089		2564.38	-0.01395636		3094.37	-0.00180873		3624.37	-0.00461851		4154.37	-0.0002106
444.6	-0.02184386		974.59	-0.00940763		1504.59	0.00259967		2034.58	-0.00323803		2564.58	-0.01298082		3094.57	-0.00233474		3624.57	-0.00423578		4154.57	-0.00052014
444.8	-0.02145871		974.79	-0.00950451		1504.79	0.00246169		2034.78	-0.00268424		2564.78	-0.01308788		3094.77	-0.00284632		3624.77	-0.00419137		4154.77	-0.0001642
445	-0.02148934		974.99	-0.00881865		1504.99	0.00152427		2034.98	-0.00241332		2564.98	-0.01318674		3094.97	-0.00390267		3624.97	-0.00373871		4154.97	-0.00004437
445.2	-0.02149816		975.19	-0.00948745		1505.19	0.00192192		2035.18	-0.00246278		2565.18	-0.01322099		3095.17	-0.00473015		3625.17	-0.00293836		4155.17	0.00019727
445.4	-0.02174713		975.39	-0.00990989		1505.39	0.00200037		2035.38	-0.00324489		2565.38	-0.01339732		3095.37	-0.00466106		3625.37	-0.00378793		4155.37	0.0000909
445.6	-0.02062566		975.59	-0.01041764		1505.59	0.00204437		2035.58	-0.00330422		2565.58	-0.01364715		3095.57	-0.00510177		3625.57	-0.00482172		4155.57	0.00086594
445.8	-0.02082065		975.79	-0.01066059		1505.79	0.00205472		2035.78	-0.00360595		2565.78	-0.01377079		3095.77	-0.00566623		3625.77	-0.00563732		4155.77	0.00056956
446	-0.0211523		975.99	-0.01100181		1505.99	0.0015696		2035.98	-0.00279723		2565.98	-0.01420444		3095.97	-0.0056468		3625.97	-0.0065953		4155.97	0.00053829
446.2	-0.02079793		976.19	-0.01099385		1506.19	0.00209704		2036.18	-0.00265171		2566.18	-0.01437933		3096.17	-0.00547992		3626.17	-0.00716702		4156.17	0.00063171
446.4	-0.02125662		976.39	-0.0105032		1506.39	0.00228308		2036.38	-0.0025877		2566.38	-0.0134767		3096.37	-0.00568324		3626.37	-0.00738952		4156.37	-0.00002082
446.6	-0.02205427		976.59	-0.01024519		1506.59	0.00254659		2036.58	-0.00308887		2566.58	-0.01350932		3096.57	-0.0050487		3626.57	-0.00755264		4156.57	0.00000522
446.8	-0.02204517		976.79	-0.01028609		1506.79	0.00244925		2036.78	-0.00288707		2566.78	-0.01362182		3096.77	-0.00456296		3626.77	-0.00749913		4156.77	-0.00057056
447	-0.02211549		976.99	-0.01002683		1506.99	0.00238302		2036.98	-0.00333367		2566.98	-0.01346618		3096.97	-0.00450122		3626.97	-0.00748555		4156.97	0.00001921
447.2	-0.02257322		977.19	-0.01020606		1507.19	0.00165186		2037.18	-0.00364372		2567.18	-0.0132742		3097.17	-0.00424178		3627.17	-0.00730955		4157.17	0.00051553
447.4	-0.02255687		977.39	-0.01031147		1507.39	0.00198167		2037.38	-0.00355644		2567.38	-0.01333212		3097.37	-0.00403564		3627.37	-0.0071982		4157.37	-0.00015372
447.6	-0.02196326		977.59	-0.00960255		1507.59	0.00227597		2037.58	-0.00456431		2567.58	-0.01307745		3097.57	-0.00333999		3627.57	-0.00771097		4157.57	-0.00047475
447.8	-0.02171195		977.79	-0.00964993		1507.79	0.00170133		2037.78	-0.00552136		2567.78	-0.01214153		3097.77	-0.0030235		3627.77	-0.00727028		4157.77	-0.00022748
448	-0.02126341		977.99	-0.00990369		1507.99	0.00132441		2037.98	-0.00541095		2567.98	-0.01201822		3097.97	-0.00257778		3627.97	-0.00747825		4157.97	-0.00078799
448.2	-0.02112939		978.19	-0.01014074		1508.19	0.00130343		2038.18	-0.00570867		2568.18	-0.01156978		3098.17	-0.00202673		3628.17	-0.0078053		4158.17	-0.00183301
448.4	-0.02158562		978.39	-0.00888111		1508.39	0.00123267		2038.38	-0.00620178		2568.38	-0.01070305		3098.37	-0.00158388		3628.37	-0.0075248		4158.37	-0.00185826
448.6	-0.02235703		978.59	-0.00898503		1508.59	0.0004803		2038.58	-0.00611449		2568.58	-0.00995527		3098.57	-0.00110575		3628.57	-0.00727829		4158.57	-0.00186053
448.8	-0.02280852		978.79	-0.00878271		1508.79	0.00003593		2038.78	-0.00611892		2568.78	-0.01008794		3098.77	-0.00096829		3628.77	-0.00714552		4158.77	-0.00236999
449	-0.02310331		978.99	-0.00820964		1508.99	-0.00098719		2038.98	-0.00611815		2568.98	-0.01056892		3098.97	-0.00088876		3628.97	-0.00658754		4158.97	-0.00279014
449.2	-0.02282734		979.19	-0.00814351		1509.19	-0.00024407		2039.18	-0.00733646		2569.18	-0.01125985		3099.17	-0.0004811		3629.17	-0.00628318		4159.17	-0.00231155
449.4	-0.0225424		979.39	-0.00829817		1509.39	0.00027601		2039.38	-0.0071272		2569.38	-0.01225058		3099.37	-0.0006951		3629.37	-0.00747617		4159.37	-0.00212743
449.6	-0.02284818		979.59	-0.00905086		1509.59	0.00029623		2039.58	-0.00697785		2569.58	-0.01315685		3099.57	-0.00052969		3629.57	-0.00759079		4159.57	-0.00215311
449.8	-0.02339738		979.79	-0.00807174		1509.79	0.00065775		2039.78	-0.00615231		2569.78	-0.01208102		3099.77	-0.00029196		3629.77	-0.00817786		4159.77	-0.00196231
450	-0.02314027		979.99	-0.00779498		1509.99	0.00099389		2039.98	-0.00616895		2569.98	-0.01152013		3099.97	-0.00011685		3629.97	-0.0093939		4159.97	-0.00106577
450.2	-0.0230426		980.19	-0.0082667		1510.19	0.00175646		2040.18	-0.00552905		2570.18	-0.0109633		3100.17	-0.00118238		3630.17	-0.00963338		4160.17	-0.00167334
450.4	-0.02311987		980.39	-0.00806491		1510.39	0.00203784		2040.38	-0.00484401		2570.38	-0.01015444		3100.37	-0.00131602		3630.37	-0.00965997		4160.37	-0.0028292
450.6	-0.02301397		980.59	-0.0084009		1510.59	0.00138365		2040.58	-0.0049998		2570.58	-0.01081119		3100.57	-0.00215428		3630.57	-0.0097592		4160.57	-0.00305291
450.8	-0.02305978		980.79	-0.00929307		1510.79	0.00223676		2040.78	-0.00450877		2570.78	-0.01108224		3100.77	-0.00288394		3630.77	-0.00970727		4160.77	-0.00321936
451	-0.02331853		980.99	-0.00967239		1510.99	0.00244671		2040.98	-0.00380926		2570.98	-0.01100014		3100.97	-0.00359103		3630.97	-0.01051208		4160.97	-0.00289792
451.2	-0.02311515		981.19	-0.010117		1511.19	0.00216026		2041.18	-0.0031959		2571.18	-0.01090178		3101.17	-0.0041453		3631.17	-0.01123151		4161.17	-0.00323196
451.4	-0.0229578		981.39	-0.01085599		1511.39	0.00234576		2041.38	-0.0029471		2571.38	-0.01068713		3101.37	-0.0044756		3631.37	-0.01122625		4161.37	-0.00383528
451.6	-0.02357953		981.59	-0.01074353		1511.59	0.00168162		2041.58	-0.00345468		2571.58	-0.01092017		3101.57	-0.0031008		3631.57	-0.01096185		4161.57	-0.00410664
451.8	-0.02331918		981.79	-0.01132866		1511.79	0.00111671		2041.78	-0.00354269		2571.78	-0.01109972		3101.77	-0.00292278		3631.77	-0.0103752		4161.77	-0.00402752
452	-0.02312442		981.99	-0.01180123		1511.99	0.00051387		2041.98	-0.00389924		2571.98	-0.01198766		3101.97	-0.00239812		3631.97	-0.01005315		4161.97	-0.00442544
452.2	-0.02307784		982.19	-0.01150553		1512.19	-0.00021931		2042.18	-0.0048901		2572.18	-0.01281914		3102.17	-0.00207302		3632.17	-0.01014145		4162.17	-0.00324169
452.4	-0.02334725		982.39	-0.01092637		1512.39	-0.00065304		2042.38	-0.00488411		2572.38	-0.01428678		3102.37	-0.00187517		3632.37	-0.00972109		4162.37	-0.00262345
452.6	-0.02421462		982.59	-0.0114922		1512.59	-0.00149665		2042.58	-0.00510652		2572.58	-0.01535384		3102.57	-0.00167952		3632.57	-0.00938924		4162.57	-0.00208063
452.8	-0.02414811		982.79	-0.01092691		1512.79	-0.00232838		2042.78	-0.00556517		2572.78	-0.01606998		3102.77	-0.00209017		3632.77	-0.0087113		4162.77	-0.00149516
453	-0.02384229		982.99	-0.01033666		1512.99	-0.00238062		2042.98	-0.0059512		2572.98	-0.01716402		3102.97	-0.00207044		3632.97	-0.00788299		4162.97	-0.00041493
453.2	-0.02370061		983.19	-0.00960349		1513.19	-0.00212483		2043.18	-0.00610109		2573.18	-0.01842187		3103.17	-0.00297013		3633.17	-0.00768691		4163.17	0.00085258
453.4	-0.02425588		983.39	-0.01016545		1513.39	-0.00188687		2043.38	-0.00560532		2573.38	-0.01862025		3103.37	-0.00341963		3633.37	-0.00748007		4163.37	0.00079256
453.6	-0.02424751		983.59	-0.01013961		1513.59	-0.00230094		2043.58	-0.00605609		2573.58	-0.01833831		3103.57	-0.00334241		3633.57	-0.00664299		4163.57	0.00109571
453.8	-0.02401369		983.79	-0.00967035		1513.79	-0.0019627		2043.78	-0.00561784		2573.78	-0.01690299		3103.77	-0.00271397		3633.77	-0.00697717		4163.77	0.00147286
454	-0.02415793		983.99	-0.01021357		1513.99	-0.00271788		2043.98	-0.00595124		2573.98	-0.01741266		3103.97	-0.00280189		3633.97	-0.00635721		4163.97	0.00131731
454.2	-0.02441243		984.19	-0.00989468		1514.19	-0.00301124		2044.18	-0.00517823		2574.18	-0.0173154		3104.17	-0.00367338		3634.17	-0.0057097		4164.17	0.00007704
454.4	-0.02462384		984.39	-0.00968572		1514.39	-0.00304669		2044.38	-0.00405056		2574.38	-0.01730205		3104.37	-0.00352074		3634.37	-0.00551611		4164.37	-0.00017069
454.6	-0.0236948		984.59	-0.00989016		1514.59	-0.00396576		2044.58	-0.00444304		2574.58	-0.01631913		3104.57	-0.00403369		3634.57	-0.00596676		4164.57	-0.00104351
454.8	-0.02466487		984.79	-0.00992205		1514.79	-0.00213835		2044.78	-0.00372204		2574.78	-0.01480803		3104.77	-0.00386259		3634.77	-0.00580068		4164.77	-0.00154874
455	-0.02417473		984.99	-0.00900502		1514.99	-0.00197089		2044.98	-0.00302352		2574.98	-0.01382694		3104.97	-0.00405276		3634.97	-0.00666112		4164.97	-0.00167327
455.2	-0.02415347		985.19	-0.00847418		1515.19	-0.00227247		2045.18	-0.00342601		2575.18	-0.01352456		3105.17	-0.00402753		3635.17	-0.00644957		4165.17	-0.00284828
455.4	-0.02428297		985.39	-0.00800645		1515.39	-0.00271637		2045.38	-0.00319527		2575.38	-0.01314076		3105.37	-0.00348597		3635.37	-0.00578036		4165.37	-0.00315897
455.6	-0.02520847		985.59	-0.00722179		1515.59	-0.00304411		2045.58	-0.00358291		2575.58	-0.01290669		3105.57	-0.00255303		3635.57	-0.00535678		4165.57	-0.00360651
455.8	-0.02458918		985.79	-0.0075691		1515.79	-0.00358283		2045.78	-0.00438367		2575.78	-0.01281356		3105.77	-0.00234478		3635.77	-0.00544578		4165.77	-0.00299686
456	-0.02473446		985.99	-0.00764465		1515.99	-0.00317946		2045.98	-0.00461583		2575.98	-0.01213417		3105.97	-0.00153436		3635.97	-0.00568754		4165.97	-0.00290721
456.2	-0.02514035		986.19	-0.00764756		1516.19	-0.00330115		2046.18	-0.00488422		2576.18	-0.01170851		3106.17	-0.00103845		3636.17	-0.00619779		4166.17	-0.00212358
456.4	-0.02507469		986.39	-0.00881499		1516.39	-0.00301333		2046.38	-0.00559286		2576.38	-0.01233935		3106.37	-0.00114959		3636.37	-0.00637769		4166.37	-0.00227633
456.6	-0.02565477		986.59	-0.00974597		1516.59	-0.00271392		2046.58	-0.00655763		2576.58	-0.01227049		3106.57	-0.00149887		3636.57	-0.00708996		4166.57	-0.00132084
456.8	-0.02457484		986.79	-0.01017168		1516.79	-0.0030814		2046.78	-0.00666023		2576.78	-0.01230929		3106.77	-0.00232648		3636.77	-0.00749049		4166.77	-0.00066825
457	-0.02458279		986.99	-0.01058096		1516.99	-0.00260823		2046.98	-0.00649627		2576.98	-0.01297994		3106.97	-0.00266013		3636.97	-0.00772911		4166.97	-0.00022276
457.2	-0.02491969		987.19	-0.01041509		1517.19	-0.0026894		2047.18	-0.00564705		2577.18	-0.01423479		3107.17	-0.00333923		3637.17	-0.00750511		4167.17	0.00024636
457.4	-0.02513777		987.39	-0.01127024		1517.39	-0.00146908		2047.38	-0.0056071		2577.38	-0.0134511		3107.37	-0.00342949		3637.37	-0.00701584		4167.37	0.00007915
457.6	-0.02472745		987.59	-0.01151675		1517.59	-0.00121643		2047.58	-0.00551907		2577.58	-0.01470447		3107.57	-0.00321464		3637.57	-0.00763129		4167.57	0.00022194
457.8	-0.02548428		987.79	-0.01237507		1517.79	-0.00071352		2047.78	-0.00608		2577.78	-0.01466114		3107.77	-0.0029343		3637.77	-0.00871985		4167.77	-0.00032755
458	-0.02554272		987.99	-0.01223302		1517.99	-0.00113982		2047.98	-0.00644698		2577.98	-0.01535447		3107.97	-0.0030355		3637.97	-0.00871858		4167.97	-0.00068235
458.2	-0.02482468		988.19	-0.01229547		1518.19	-0.00064026		2048.18	-0.00620247		2578.18	-0.01514542		3108.17	-0.00378132		3638.17	-0.009467		4168.17	-0.00125041
458.4	-0.02500235		988.39	-0.01211671		1518.39	-0.00096595		2048.38	-0.00587977		2578.38	-0.01513849		3108.37	-0.00367657		3638.37	-0.01039931		4168.37	-0.00147576
458.6	-0.02511236		988.59	-0.01127053		1518.59	-0.00147355		2048.58	-0.00697889		2578.58	-0.01464191		3108.57	-0.00331681		3638.57	-0.01046453		4168.57	-0.00286874
458.8	-0.02537967		988.79	-0.01019265		1518.79	-0.00037882		2048.78	-0.00714847		2578.78	-0.01433933		3108.77	-0.00353625		3638.77	-0.01075392		4168.77	-0.00332816
459	-0.02416699		988.99	-0.00953137		1518.99	-0.00078656		2048.98	-0.00704033		2578.98	-0.01524318		3108.97	-0.00419147		3638.97	-0.01110165		4168.97	-0.00372978
459.2	-0.02390137		989.19	-0.00909247		1519.19	-0.00071975		2049.18	-0.00642306		2579.18	-0.01510599		3109.17	-0.00475301		3639.17	-0.01058744		4169.17	-0.00480277
459.4	-0.02329544		989.39	-0.00908143		1519.39	-0.00096892		2049.38	-0.00602651		2579.38	-0.01495435		3109.37	-0.00483545		3639.37	-0.01048843		4169.37	-0.00457478
459.6	-0.02328513		989.59	-0.00831074		1519.59	-0.00176807		2049.58	-0.00574902		2579.58	-0.01461451		3109.57	-0.00390191		3639.57	-0.01013534		4169.57	-0.0052085
459.8	-0.02272613		989.79	-0.00824231		1519.79	-0.0018862		2049.78	-0.00512878		2579.78	-0.01494216		3109.77	-0.00295223		3639.77	-0.0100912		4169.77	-0.00527422
460	-0.02243567		989.99	-0.00805012		1519.99	-0.00159944		2049.98	-0.00524922		2579.98	-0.01414536		3109.97	-0.00347463		3639.97	-0.0100759		4169.97	-0.00588262
460.2	-0.02201874		990.19	-0.00762519		1520.19	-0.00245985		2050.18	-0.00542301		2580.18	-0.01452241		3110.17	-0.00313161		3640.17	-0.00944482		4170.17	-0.00554141
460.4	-0.0217348		990.39	-0.0077478		1520.39	-0.00242684		2050.38	-0.00520188		2580.38	-0.01514393		3110.37	-0.00294992		3640.37	-0.00961279		4170.37	-0.00489162
460.6	-0.02146168		990.59	-0.00812274		1520.59	-0.0025683		2050.58	-0.00477514		2580.58	-0.01492826		3110.57	-0.00252836		3640.57	-0.00897585		4170.57	-0.00462147
460.8	-0.02142119		990.79	-0.00779608		1520.79	-0.00262659		2050.78	-0.00481626		2580.78	-0.01487346		3110.77	-0.00275994		3640.77	-0.0086314		4170.77	-0.00373624
461	-0.02259108		990.99	-0.00767726		1520.99	-0.00224589		2050.98	-0.0042014		2580.98	-0.01564454		3110.97	-0.00222068		3640.97	-0.00801		4170.97	-0.00339776
461.2	-0.02315034		991.19	-0.00779975		1521.19	-0.00210725		2051.18	-0.00291307		2581.18	-0.01540009		3111.17	-0.0014908		3641.17	-0.00726466		4171.17	-0.00325996
461.4	-0.02349162		991.39	-0.00841162		1521.39	-0.00102717		2051.38	-0.00355998		2581.38	-0.0142153		3111.37	-0.00162092		3641.37	-0.00777255		4171.37	-0.00321088
461.6	-0.02386207		991.59	-0.00888083		1521.59	-0.00162586		2051.58	-0.00426411		2581.58	-0.01485249		3111.57	-0.00144554		3641.57	-0.00881451		4171.57	-0.0027621
461.8	-0.02433988		991.79	-0.01012898		1521.79	-0.0019086		2051.78	-0.0047789		2581.78	-0.01425093		3111.77	-0.00071706		3641.77	-0.00927185		4171.77	-0.00253476
462	-0.02403914		991.99	-0.00988993		1521.99	-0.00266986		2051.98	-0.0050247		2581.98	-0.01397157		3111.97	-0.00074465		3641.97	-0.00943147		4171.97	-0.00308136
462.2	-0.02440355		992.19	-0.01029274		1522.19	-0.00221177		2052.18	-0.00473018		2582.18	-0.01384275		3112.17	-0.00132007		3642.17	-0.01017314		4172.17	-0.00326321
462.4	-0.02512616		992.39	-0.01018329		1522.39	-0.00232589		2052.38	-0.00454435		2582.38	-0.01427653		3112.37	-0.00100482		3642.37	-0.01072816		4172.37	-0.00338267
462.6	-0.02541611		992.59	-0.01068852		1522.59	-0.00216834		2052.58	-0.00516535		2582.58	-0.01448187		3112.57	-0.0014455		3642.57	-0.01059827		4172.57	-0.00369922
462.8	-0.02488043		992.79	-0.01138205		1522.79	-0.00198777		2052.78	-0.0050193		2582.78	-0.01390847		3112.77	-0.00228637		3642.77	-0.01098413		4172.77	-0.00393667
463	-0.02471709		992.99	-0.01178658		1522.99	-0.00138917		2052.98	-0.00460066		2582.98	-0.01416608		3112.97	-0.0030958		3642.97	-0.01143644		4172.97	-0.00404519
463.2	-0.0243003		993.19	-0.01200276		1523.19	-0.00160111		2053.18	-0.00380155		2583.18	-0.01398582		3113.17	-0.00348241		3643.17	-0.01142974		4173.17	-0.00466349
463.4	-0.02398076		993.39	-0.01217641		1523.39	-0.00224347		2053.38	-0.0037978		2583.38	-0.01424992		3113.37	-0.00326294		3643.37	-0.01194318		4173.37	-0.00447994
463.6	-0.02416298		993.59	-0.01153339		1523.59	-0.00266563		2053.58	-0.00371848		2583.58	-0.01448546		3113.57	-0.00346752		3643.57	-0.01134244		4173.57	-0.00430458
463.8	-0.02402344		993.79	-0.01102414		1523.79	-0.00246704		2053.78	-0.00328824		2583.78	-0.0137847		3113.77	-0.00421583		3643.77	-0.01139519		4173.77	-0.00376364
464	-0.02402719		993.99	-0.01052747		1523.99	-0.00280269		2053.98	-0.00394011		2583.98	-0.0131413		3113.97	-0.00473324		3643.97	-0.01110544		4173.97	-0.00351731
464.2	-0.0237319		994.19	-0.00973725		1524.19	-0.00222515		2054.18	-0.00453225		2584.18	-0.01327687		3114.17	-0.00485787		3644.17	-0.01079647		4174.17	-0.00333627
464.4	-0.02393738		994.39	-0.00958752		1524.39	-0.00189751		2054.38	-0.00501282		2584.38	-0.01360765		3114.37	-0.00537143		3644.37	-0.01007649		4174.37	-0.00226052
464.6	-0.02419252		994.59	-0.00974969		1524.59	-0.0018886		2054.58	-0.00575246		2584.58	-0.01298881		3114.57	-0.00587532		3644.57	-0.00899522		4174.57	-0.00215257
464.8	-0.0245748		994.79	-0.00988632		1524.79	-0.0017118		2054.78	-0.00656389		2584.78	-0.01300511		3114.77	-0.00607046		3644.77	-0.0086536		4174.77	-0.00144307
465	-0.02444534		994.99	-0.00984292		1524.99	-0.00188498		2054.98	-0.00630164		2584.98	-0.0131905		3114.97	-0.00647221		3644.97	-0.00793477		4174.97	-0.00172865
465.2	-0.02420717		995.19	-0.01066075		1525.19	-0.0025785		2055.18	-0.00706821		2585.18	-0.01301422		3115.17	-0.00618624		3645.17	-0.00818849		4175.17	-0.00130529
465.4	-0.02426945		995.39	-0.01030615		1525.39	-0.00257704		2055.38	-0.00771589		2585.38	-0.01371734		3115.37	-0.00733461		3645.37	-0.00856645		4175.37	-0.00100662
465.6	-0.02401001		995.59	-0.01012979		1525.59	-0.0033334		2055.58	-0.00800017		2585.58	-0.01457277		3115.57	-0.00761354		3645.57	-0.00850533		4175.57	-0.00160037
465.8	-0.02451057		995.79	-0.01059111		1525.79	-0.00375264		2055.78	-0.00840208		2585.78	-0.01501879		3115.77	-0.00712421		3645.77	-0.00881214		4175.77	-0.00173217
466	-0.02476892		995.99	-0.01052275		1525.99	-0.00416294		2055.98	-0.00842971		2585.98	-0.01497533		3115.97	-0.00724329		3645.97	-0.00959649		4175.97	-0.00260527
466.2	-0.02613647		996.19	-0.01036789		1526.19	-0.0034019		2056.18	-0.00783568		2586.18	-0.01565475		3116.17	-0.00650928		3646.17	-0.01050119		4176.17	-0.00283269
466.4	-0.02572572		996.39	-0.01072164		1526.39	-0.00359502		2056.38	-0.00713183		2586.38	-0.01635332		3116.37	-0.00607498		3646.37	-0.01048164		4176.37	-0.00361152
466.6	-0.02563396		996.59	-0.0106814		1526.59	-0.00362641		2056.58	-0.00683828		2586.58	-0.01694695		3116.57	-0.00555186		3646.57	-0.01020406		4176.57	-0.00402801
466.8	-0.02572826		996.79	-0.01123578		1526.79	-0.0032775		2056.78	-0.00639598		2586.78	-0.01648764		3116.77	-0.00451659		3646.77	-0.00997765		4176.77	-0.00433294
467	-0.02530327		996.99	-0.0112992		1526.99	-0.00305865		2056.98	-0.00611961		2586.98	-0.01717696		3116.97	-0.00390775		3646.97	-0.01020857		4176.97	-0.00499732
467.2	-0.02559427		997.19	-0.01199938		1527.19	-0.00343872		2057.18	-0.00475719		2587.18	-0.01744365		3117.17	-0.00308747		3647.17	-0.01016576		4177.17	-0.00534598
467.4	-0.02587964		997.39	-0.01300431		1527.39	-0.00375891		2057.38	-0.00423398		2587.38	-0.01714346		3117.37	-0.00200877		3647.37	-0.01026667		4177.37	-0.00501826
467.6	-0.02671316		997.59	-0.01407857		1527.59	-0.00366008		2057.58	-0.0038977		2587.58	-0.01752006		3117.57	-0.00242412		3647.57	-0.00872719		4177.57	-0.0053266
467.8	-0.02736473		997.79	-0.01444332		1527.79	-0.00352771		2057.78	-0.00285106		2587.78	-0.01721261		3117.77	-0.00055247		3647.77	-0.0085961		4177.77	-0.00602718
468	-0.0272967		997.99	-0.01481583		1527.99	-0.00286321		2057.98	-0.00285023		2587.98	-0.01763865		3117.97	-0.00053623		3647.97	-0.00859713		4177.97	-0.00639668
468.2	-0.02744628		998.19	-0.01513051		1528.19	-0.00192629		2058.18	-0.00357585		2588.18	-0.01800808		3118.17	-0.00089257		3648.17	-0.00859696		4178.17	-0.00613956
468.4	-0.02791658		998.39	-0.01548551		1528.39	-0.00207322		2058.38	-0.00341084		2588.38	-0.01810582		3118.37	-0.00095745		3648.37	-0.00810023		4178.37	-0.00591448
468.6	-0.0280706		998.59	-0.01563542		1528.59	-0.00192297		2058.58	-0.00320764		2588.58	-0.01634071		3118.57	-0.00137253		3648.57	-0.00846259		4178.57	-0.00672018
468.8	-0.02679992		998.79	-0.01506395		1528.79	-0.00165525		2058.78	-0.00310773		2588.78	-0.01697105		3118.77	-0.00152097		3648.77	-0.00865089		4178.77	-0.00603701
469	-0.02660705		998.99	-0.01484739		1528.99	-0.00186524		2058.98	-0.00366121		2588.98	-0.01574059		3118.97	-0.00221782		3648.97	-0.00929477		4178.97	-0.00556415
469.2	-0.02640924		999.19	-0.01529983		1529.19	-0.00190397		2059.18	-0.00500941		2589.18	-0.01533637		3119.17	-0.00228994		3649.17	-0.00981346		4179.17	-0.00451479
469.4	-0.02616919		999.39	-0.01409868		1529.39	-0.00183454		2059.38	-0.00455399		2589.38	-0.01496965		3119.37	-0.00315562		3649.37	-0.01024848		4179.37	-0.00455963
469.6	-0.02619461		999.59	-0.01269474		1529.59	-0.00228828		2059.58	-0.00616258		2589.58	-0.01413395		3119.57	-0.00359439		3649.57	-0.01013294		4179.57	-0.00473275
469.8	-0.02629845		999.79	-0.01205763		1529.79	-0.0029431		2059.78	-0.00696062		2589.78	-0.01325837		3119.77	-0.00416546		3649.77	-0.01063074		4179.77	-0.00398833
470	-0.02540121		999.99	-0.01137425		1529.99	-0.00333872		2059.98	-0.0072958		2589.98	-0.01249287		3119.97	-0.00399471		3649.97	-0.01171049		4179.97	-0.00386698
470.2	-0.02512066		1000.19	-0.01062067		1530.19	-0.00359635		2060.18	-0.00747413		2590.18	-0.01222499		3120.17	-0.00440745		3650.17	-0.01156611		4180.17	-0.00348879
470.4	-0.02388102		1000.39	-0.01041009		1530.39	-0.00376962		2060.38	-0.00679179		2590.38	-0.01234203		3120.37	-0.0050353		3650.37	-0.01083999		4180.37	-0.00381391
470.6	-0.02326085		1000.59	-0.00966643		1530.59	-0.00296557		2060.58	-0.00713206		2590.58	-0.01231631		3120.57	-0.00506745		3650.57	-0.01019386		4180.57	-0.00357503
470.8	-0.02332937		1000.79	-0.01008397		1530.79	-0.00310882		2060.78	-0.00730434		2590.78	-0.01202162		3120.77	-0.00510173		3650.77	-0.00971729		4180.77	-0.00395292
471	-0.02390573		1000.99	-0.00985482		1530.99	-0.00346612		2060.98	-0.00764937		2590.98	-0.01302003		3120.97	-0.00506633		3650.97	-0.00937415		4180.97	-0.00474192
471.2	-0.02528196		1001.19	-0.0109519		1531.19	-0.00388412		2061.18	-0.00638531		2591.18	-0.01378852		3121.17	-0.00451334		3651.17	-0.00960579		4181.17	-0.00455013
471.4	-0.02522445		1001.39	-0.01197546		1531.39	-0.00377607		2061.38	-0.0062958		2591.38	-0.014394		3121.37	-0.00368674		3651.37	-0.00902392		4181.37	-0.00542343
471.6	-0.02570825		1001.59	-0.01222561		1531.59	-0.00357336		2061.58	-0.00614918		2591.58	-0.01492703		3121.57	-0.00314015		3651.57	-0.00780944		4181.57	-0.00648279
471.8	-0.02611043		1001.79	-0.01219236		1531.79	-0.00345145		2061.78	-0.00551737		2591.78	-0.01602806		3121.77	-0.0026167		3651.77	-0.00733436		4181.77	-0.00644787
472	-0.0263413		1001.99	-0.01217718		1531.99	-0.00233875		2061.98	-0.00592779		2591.98	-0.01674948		3121.97	-0.00364577		3651.97	-0.00749828		4181.97	-0.00646426
472.2	-0.0271763		1002.19	-0.01182692		1532.19	-0.00200602		2062.18	-0.00569713		2592.18	-0.01754899		3122.17	-0.00288475		3652.17	-0.00763995		4182.17	-0.00621619
472.4	-0.02741212		1002.39	-0.01260766		1532.39	-0.00161952		2062.38	-0.00583231		2592.38	-0.0180292		3122.37	-0.00259496		3652.37	-0.00760362		4182.37	-0.00639996
472.6	-0.02810202		1002.59	-0.01213621		1532.59	-0.00169835		2062.58	-0.00548352		2592.58	-0.0171032		3122.57	-0.00249656		3652.57	-0.00784056		4182.57	-0.00628439
472.8	-0.02803203		1002.79	-0.01158725		1532.79	-0.00155757		2062.78	-0.0057496		2592.78	-0.01739599		3122.77	-0.00262491		3652.77	-0.00795007		4182.77	-0.00498984
473	-0.02857618		1002.99	-0.01211371		1532.99	-0.00169207		2062.98	-0.00661088		2592.98	-0.01602709		3122.97	-0.00238325		3652.97	-0.00882486		4182.97	-0.00428983
473.2	-0.0288825		1003.19	-0.01157984		1533.19	-0.00190209		2063.18	-0.00653044		2593.18	-0.01596207		3123.17	-0.00171131		3653.17	-0.00799538		4183.17	-0.004406
473.4	-0.02950812		1003.39	-0.0104841		1533.39	-0.00236554		2063.38	-0.00632659		2593.38	-0.01528353		3123.37	-0.00119518		3653.37	-0.00832283		4183.37	-0.00471953
473.6	-0.02912557		1003.59	-0.01000536		1533.59	-0.00267135		2063.58	-0.00702581		2593.58	-0.01399203		3123.57	-0.00232324		3653.57	-0.00794337		4183.57	-0.00441544
473.8	-0.02830213		1003.79	-0.01004567		1533.79	-0.00318764		2063.78	-0.00665053		2593.78	-0.01341968		3123.77	-0.00323541		3653.77	-0.00803397		4183.77	-0.00467651
474	-0.02761912		1003.99	-0.00988947		1533.99	-0.00328575		2063.98	-0.00698245		2593.98	-0.01297504		3123.97	-0.0027376		3653.97	-0.00806926		4183.97	-0.00404676
474.2	-0.02747156		1004.19	-0.01075685		1534.19	-0.0032646		2064.18	-0.00717068		2594.18	-0.01282926		3124.17	-0.00270147		3654.17	-0.00736846		4184.17	-0.00452748
474.4	-0.02760124		1004.39	-0.01105142		1534.39	-0.00268025		2064.38	-0.0068981		2594.38	-0.01296841		3124.37	-0.00342358		3654.37	-0.00825559		4184.37	-0.00434821
474.6	-0.02770745		1004.59	-0.01070131		1534.59	-0.00242359		2064.58	-0.00709399		2594.58	-0.01270557		3124.57	-0.00337477		3654.57	-0.0076356		4184.57	-0.0048592
474.8	-0.0278721		1004.79	-0.011745		1534.79	-0.00297327		2064.78	-0.00623068		2594.78	-0.01294847		3124.77	-0.00347169		3654.77	-0.00849358		4184.77	-0.00455556
475	-0.02807412		1004.99	-0.01181817		1534.99	-0.00281121		2064.98	-0.00631331		2594.98	-0.01349651		3124.97	-0.00342371		3654.97	-0.00967292		4184.97	-0.00430374
475.2	-0.02763645		1005.19	-0.01320944		1535.19	-0.00285549		2065.18	-0.00531044		2595.18	-0.01388029		3125.17	-0.00334877		3655.17	-0.01044084		4185.17	-0.00411691
475.4	-0.02576793		1005.39	-0.01350675		1535.39	-0.00240108		2065.38	-0.00523551		2595.38	-0.01302768		3125.37	-0.00292122		3655.37	-0.01068483		4185.37	-0.00436221
475.6	-0.02563223		1005.59	-0.01393932		1535.59	-0.0035874		2065.58	-0.00544814		2595.58	-0.01356439		3125.57	-0.00364698		3655.57	-0.01068565		4185.57	-0.00408577
475.8	-0.02574242		1005.79	-0.01409481		1535.79	-0.0039773		2065.78	-0.00551609		2595.78	-0.01420725		3125.77	-0.00451582		3655.77	-0.01157118		4185.77	-0.00436624
476	-0.02621374		1005.99	-0.01380869		1535.99	-0.00377177		2065.98	-0.00608067		2595.98	-0.01434153		3125.97	-0.00368326		3655.97	-0.01207476		4185.97	-0.00467737
476.2	-0.02652387		1006.19	-0.01365814		1536.19	-0.00431052		2066.18	-0.00592806		2596.18	-0.01443179		3126.17	-0.00320133		3656.17	-0.01231374		4186.17	-0.00438919
476.4	-0.02695269		1006.39	-0.01436208		1536.39	-0.00511256		2066.38	-0.00736377		2596.38	-0.01495568		3126.37	-0.00343263		3656.37	-0.0129011		4186.37	-0.00362487
476.6	-0.02793568		1006.59	-0.01399512		1536.59	-0.00595833		2066.58	-0.00699649		2596.58	-0.01461415		3126.57	-0.00442392		3656.57	-0.01278194		4186.57	-0.00312376
476.8	-0.02791871		1006.79	-0.01334818		1536.79	-0.00573464		2066.78	-0.00819492		2596.78	-0.01466244		3126.77	-0.00512368		3656.77	-0.01276746		4186.77	-0.00216291
477	-0.02845198		1006.99	-0.0133162		1536.99	-0.0059204		2066.98	-0.00835657		2596.98	-0.01547364		3126.97	-0.0046798		3656.97	-0.01299526		4186.97	-0.0014669
477.2	-0.02880586		1007.19	-0.01274801		1537.19	-0.00598231		2067.18	-0.00823819		2597.18	-0.01537911		3127.17	-0.00391142		3657.17	-0.01226378		4187.17	-0.00140824
477.4	-0.02830156		1007.39	-0.01191513		1537.39	-0.0054143		2067.38	-0.00818126		2597.38	-0.01568295		3127.37	-0.00494295		3657.37	-0.01305399		4187.37	-0.00159024
477.6	-0.02771512		1007.59	-0.01226395		1537.59	-0.00563164		2067.58	-0.00795233		2597.58	-0.01559372		3127.57	-0.00572269		3657.57	-0.01227218		4187.57	-0.00116056
477.8	-0.0275924		1007.79	-0.0118381		1537.79	-0.0052943		2067.78	-0.00819267		2597.78	-0.01582583		3127.77	-0.00539989		3657.77	-0.01132457		4187.77	-0.00123828
478	-0.02801196		1007.99	-0.01204421		1537.99	-0.0046447		2067.98	-0.0082697		2597.98	-0.01535963		3127.97	-0.00464865		3657.97	-0.0111412		4187.97	-0.00051173
478.2	-0.02845259		1008.19	-0.01250042		1538.19	-0.00400872		2068.18	-0.00841989		2598.18	-0.01618303		3128.17	-0.00466264		3658.17	-0.01145652		4188.17	-0.00040056
478.4	-0.02884837		1008.39	-0.01254574		1538.39	-0.00300185		2068.38	-0.00744087		2598.38	-0.01706947		3128.37	-0.00484966		3658.37	-0.01126078		4188.37	-0.00005894
478.6	-0.02883503		1008.59	-0.01252139		1538.59	-0.00244585		2068.58	-0.00680934		2598.58	-0.01734352		3128.57	-0.00436184		3658.57	-0.0106063		4188.57	-0.00032706
478.8	-0.02818196		1008.79	-0.01325226		1538.79	-0.00240137		2068.78	-0.0058119		2598.78	-0.01730723		3128.77	-0.00483092		3658.77	-0.01119935		4188.77	-0.00022801
479	-0.02806079		1008.99	-0.01241993		1538.99	-0.00221344		2068.98	-0.00607533		2598.98	-0.01720423		3128.97	-0.00412166		3658.97	-0.01086885		4188.97	-0.00059454
479.2	-0.02752487		1009.19	-0.01293932		1539.19	-0.0021047		2069.18	-0.00533263		2599.18	-0.01709115		3129.17	-0.00340062		3659.17	-0.00993757		4189.17	-0.00093348
479.4	-0.02696189		1009.39	-0.01297272		1539.39	-0.00210308		2069.38	-0.00481801		2599.38	-0.01640298		3129.37	-0.00337445		3659.37	-0.00997668		4189.37	-0.00109787
479.6	-0.02765501		1009.59	-0.01302145		1539.59	-0.00255943		2069.58	-0.00593182		2599.58	-0.0165417		3129.57	-0.00417918		3659.57	-0.01079412		4189.57	-0.00192453
479.8	-0.02799983		1009.79	-0.01170113		1539.79	-0.00275586		2069.78	-0.00619465		2599.78	-0.01619368		3129.77	-0.00385957		3659.77	-0.01149591		4189.77	-0.00235595
480	-0.02828899		1009.99	-0.0115041		1539.99	-0.00309465		2069.98	-0.00676565		2599.98	-0.01589119		3129.97	-0.00350303		3659.97	-0.01107407		4189.97	-0.00212069
480.2	-0.02824191		1010.19	-0.01226617		1540.19	-0.00371925		2070.18	-0.00732751		2600.18	-0.01590147		3130.17	-0.00419065		3660.17	-0.01105969		4190.17	-0.00275397
480.4	-0.02885176		1010.39	-0.01188451		1540.39	-0.00399408		2070.38	-0.00823616		2600.38	-0.01545401		3130.37	-0.00431179		3660.37	-0.0108615		4190.37	-0.00281343
480.6	-0.02946491		1010.59	-0.01318221		1540.59	-0.00385435		2070.58	-0.00796921		2600.58	-0.01502218		3130.57	-0.0053339		3660.57	-0.01043163		4190.57	-0.0033831
480.8	-0.02905074		1010.79	-0.01291331		1540.79	-0.00352781		2070.78	-0.00938837		2600.78	-0.01505448		3130.77	-0.005923		3660.77	-0.01065801		4190.77	-0.00411507
481	-0.0288735		1010.99	-0.01403861		1540.99	-0.00396192		2070.98	-0.00938341		2600.98	-0.01620759		3130.97	-0.00568301		3660.97	-0.01164726		4190.97	-0.00487325
481.2	-0.028319		1011.19	-0.01411271		1541.19	-0.00442974		2071.18	-0.00914926		2601.18	-0.01566325		3131.17	-0.00564044		3661.17	-0.01216366		4191.17	-0.00550005
481.4	-0.02780694		1011.39	-0.01386891		1541.39	-0.00460273		2071.38	-0.00916809		2601.38	-0.01591676		3131.37	-0.00634438		3661.37	-0.0125704		4191.37	-0.0061989
481.6	-0.02794776		1011.59	-0.01384465		1541.59	-0.00568125		2071.58	-0.00955962		2601.58	-0.01570873		3131.57	-0.0056673		3661.57	-0.01305549		4191.57	-0.00561047
481.8	-0.0277415		1011.79	-0.0134304		1541.79	-0.006026		2071.78	-0.00979022		2601.78	-0.01555651		3131.77	-0.00593847		3661.77	-0.01326239		4191.77	-0.0063495
482	-0.02720865		1011.99	-0.01319177		1541.99	-0.00625732		2071.98	-0.00952221		2601.98	-0.01530783		3131.97	-0.00522031		3661.97	-0.01341011		4191.97	-0.00619461
482.2	-0.02828998		1012.19	-0.01324233		1542.19	-0.00581876		2072.18	-0.00925146		2602.18	-0.01622432		3132.17	-0.00517591		3662.17	-0.01317487		4192.17	-0.00573855
482.4	-0.0280885		1012.39	-0.01340954		1542.39	-0.00546455		2072.38	-0.00874197		2602.38	-0.01575803		3132.37	-0.00461394		3662.37	-0.01261829		4192.37	-0.00627422
482.6	-0.02763608		1012.59	-0.01337865		1542.59	-0.00549876		2072.58	-0.00906427		2602.58	-0.01533412		3132.57	-0.00454591		3662.57	-0.01336813		4192.57	-0.0065596
482.8	-0.02750165		1012.79	-0.01269381		1542.79	-0.00569414		2072.78	-0.00796107		2602.78	-0.01543285		3132.77	-0.00389606		3662.77	-0.01219614		4192.77	-0.00636411
483	-0.02716359		1012.99	-0.01232367		1542.99	-0.00506665		2072.98	-0.00783373		2602.98	-0.01551883		3132.97	-0.00397392		3662.97	-0.01191064		4192.97	-0.0059637
483.2	-0.02763425		1013.19	-0.01255963		1543.19	-0.00470059		2073.18	-0.00737313		2603.18	-0.0148948		3133.17	-0.00340666		3663.17	-0.011415		4193.17	-0.00554757
483.4	-0.02738262		1013.39	-0.01220845		1543.39	-0.0038579		2073.38	-0.00797451		2603.38	-0.01511023		3133.37	-0.00397236		3663.37	-0.01087983		4193.37	-0.00467458
483.6	-0.02740713		1013.59	-0.01176033		1543.59	-0.00290523		2073.58	-0.00825457		2603.58	-0.01583715		3133.57	-0.00385143		3663.57	-0.01086376		4193.57	-0.00494589
483.8	-0.02737329		1013.79	-0.01082083		1543.79	-0.00289079		2073.78	-0.00765909		2603.78	-0.01589434		3133.77	-0.00309586		3663.77	-0.01052748		4193.77	-0.00467782
484	-0.02631369		1013.99	-0.01126774		1543.99	-0.00305243		2073.98	-0.007641		2603.98	-0.01637556		3133.97	-0.00327599		3663.97	-0.01020363		4193.97	-0.00581891
484.2	-0.02727498		1014.19	-0.01205202		1544.19	-0.00202452		2074.18	-0.00747431		2604.18	-0.01661347		3134.17	-0.00335787		3664.17	-0.01058606		4194.17	-0.00601592
484.4	-0.02727808		1014.39	-0.01222188		1544.39	-0.00152518		2074.38	-0.00774632		2604.38	-0.01649321		3134.37	-0.00322079		3664.37	-0.010251		4194.37	-0.00613018
484.6	-0.02732237		1014.59	-0.01319339		1544.59	-0.00181238		2074.58	-0.00806016		2604.58	-0.01711944		3134.57	-0.00389736		3664.57	-0.01015152		4194.57	-0.00668115
484.8	-0.02701799		1014.79	-0.01305014		1544.79	-0.0026788		2074.78	-0.00814167		2604.78	-0.01830573		3134.77	-0.00361108		3664.77	-0.00975193		4194.77	-0.00685569
485	-0.02752275		1014.99	-0.01379315		1544.99	-0.0036567		2074.98	-0.00770078		2604.98	-0.01824112		3134.97	-0.00305473		3664.97	-0.01064205		4194.97	-0.00632997
485.2	-0.02806274		1015.19	-0.01355279		1545.19	-0.00347608		2075.18	-0.00800794		2605.18	-0.01791227		3135.17	-0.00289511		3665.17	-0.01050521		4195.17	-0.00678735
485.4	-0.02774714		1015.39	-0.01427012		1545.39	-0.00409639		2075.38	-0.00851829		2605.38	-0.01799884		3135.37	-0.00252593		3665.37	-0.01010209		4195.37	-0.00691162
485.6	-0.02735839		1015.59	-0.01382275		1545.59	-0.00432302		2075.58	-0.00819757		2605.58	-0.0174388		3135.57	-0.00252694		3665.57	-0.01035018		4195.57	-0.00654961
485.8	-0.0279358		1015.79	-0.0142676		1545.79	-0.00431344		2075.78	-0.00832977		2605.78	-0.01727734		3135.77	-0.00288404		3665.77	-0.00974219		4195.77	-0.00689312
486	-0.02852033		1015.99	-0.01444641		1545.99	-0.0040003		2075.98	-0.0081334		2605.98	-0.01700926		3135.97	-0.00143655		3665.97	-0.00939365		4195.97	-0.00631785
486.2	-0.02983659		1016.19	-0.01481686		1546.19	-0.00365668		2076.18	-0.00779666		2606.18	-0.01602738		3136.17	-0.00166428		3666.17	-0.01019331		4196.17	-0.00663165
486.4	-0.02899991		1016.39	-0.01513539		1546.39	-0.00359249		2076.38	-0.00764084		2606.38	-0.01552971		3136.37	-0.00173547		3666.37	-0.00990339		4196.37	-0.00831151
486.6	-0.02874157		1016.59	-0.01607272		1546.59	-0.00275704		2076.58	-0.00733207		2606.58	-0.0158521		3136.57	-0.00257034		3666.57	-0.00988234		4196.57	-0.00861267
486.8	-0.02938731		1016.79	-0.0160367		1546.79	-0.00270194		2076.78	-0.00745714		2606.78	-0.01508178		3136.77	-0.00311461		3666.77	-0.0090896		4196.77	-0.0087219
487	-0.02862166		1016.99	-0.01619668		1546.99	-0.00204871		2076.98	-0.0074982		2606.98	-0.01435363		3136.97	-0.00462891		3666.97	-0.00947586		4196.97	-0.00906032
487.2	-0.02819838		1017.19	-0.01581252		1547.19	-0.00195133		2077.18	-0.00731354		2607.18	-0.01396861		3137.17	-0.00424051		3667.17	-0.00899398		4197.17	-0.00867576
487.4	-0.02780723		1017.39	-0.01573919		1547.39	-0.00217327		2077.38	-0.00708864		2607.38	-0.01473777		3137.37	-0.00455407		3667.37	-0.00896411		4197.37	-0.00816474
487.6	-0.02720423		1017.59	-0.01631658		1547.59	-0.00187566		2077.58	-0.00659371		2607.58	-0.01571749		3137.57	-0.00431482		3667.57	-0.00961846		4197.57	-0.00949929
487.8	-0.02751562		1017.79	-0.01548692		1547.79	-0.0025592		2077.78	-0.00608014		2607.78	-0.0150849		3137.77	-0.00534241		3667.77	-0.01049857		4197.77	-0.00942876
488	-0.0265641		1017.99	-0.01475632		1547.99	-0.00216175		2077.98	-0.00680379		2607.98	-0.01550991		3137.97	-0.00548469		3667.97	-0.01103783		4197.97	-0.00926925
488.2	-0.02757163		1018.19	-0.01396888		1548.19	-0.00164825		2078.18	-0.00663613		2608.18	-0.01532373		3138.17	-0.00525383		3668.17	-0.01193721		4198.17	-0.00849517
488.4	-0.0272798		1018.39	-0.01341858		1548.39	-0.00263365		2078.38	-0.00720581		2608.38	-0.0157224		3138.37	-0.00441861		3668.37	-0.01107397		4198.37	-0.00878059
488.6	-0.02776995		1018.59	-0.01266684		1548.59	-0.00388443		2078.58	-0.00817259		2608.58	-0.01602568		3138.57	-0.00383075		3668.57	-0.01096786		4198.57	-0.00801017
488.8	-0.02760256		1018.79	-0.01268966		1548.79	-0.00482623		2078.78	-0.00888142		2608.78	-0.01701384		3138.77	-0.00400451		3668.77	-0.01150855		4198.77	-0.00670637
489	-0.0280607		1018.99	-0.01234324		1548.99	-0.00492667		2078.98	-0.00967409		2608.98	-0.01647406		3138.97	-0.00411182		3668.97	-0.01255323		4198.97	-0.00657672
489.2	-0.02851232		1019.19	-0.01184174		1549.19	-0.00523176		2079.18	-0.01022567		2609.18	-0.017156		3139.17	-0.00390279		3669.17	-0.01237303		4199.17	-0.00620824
489.4	-0.02837022		1019.39	-0.01130107		1549.39	-0.00638556		2079.38	-0.00996529		2609.38	-0.0172465		3139.37	-0.00373645		3669.37	-0.01262577		4199.37	-0.00530953
489.6	-0.02898226		1019.59	-0.00984968		1549.59	-0.00644449		2079.58	-0.01002767		2609.58	-0.01606145		3139.57	-0.00466955		3669.57	-0.01282375		4199.57	-0.00474513
489.8	-0.02988719		1019.79	-0.00911927		1549.79	-0.00721674		2079.78	-0.01033285		2609.78	-0.01605432		3139.77	-0.00446005		3669.77	-0.01173626		4199.77	-0.0048453
490	-0.02977504		1019.99	-0.0085959		1549.99	-0.00694207		2079.98	-0.01095943		2609.98	-0.01609428		3139.97	-0.00342208		3669.97	-0.0116955		4199.97	-0.00542806
490.2	-0.0302902		1020.19	-0.00915549		1550.19	-0.00691825		2080.18	-0.01044119		2610.18	-0.01555554		3140.17	-0.00385119		3670.17	-0.01204228		4200.17	-0.00585608
490.4	-0.03031675		1020.39	-0.01012054		1550.39	-0.00653872		2080.38	-0.01027511		2610.38	-0.01588771		3140.37	-0.00440175		3670.37	-0.01131151		4200.37	-0.0058738
490.6	-0.03021795		1020.59	-0.01061972		1550.59	-0.00596135		2080.58	-0.01084745		2610.58	-0.0148887		3140.57	-0.00495093		3670.57	-0.01122287		4200.57	-0.0054986
490.8	-0.03049332		1020.79	-0.01051806		1550.79	-0.00619775		2080.78	-0.01130873		2610.78	-0.01456628		3140.77	-0.005465		3670.77	-0.01124926		4200.77	-0.00498532
491	-0.02975843		1020.99	-0.01063082		1550.99	-0.00559596		2080.98	-0.01008087		2610.98	-0.01472198		3140.97	-0.00591082		3670.97	-0.01185235		4200.97	-0.00514571
491.2	-0.02962115		1021.19	-0.01139698		1551.19	-0.00550925		2081.18	-0.01033738		2611.18	-0.01509127		3141.17	-0.00548911		3671.17	-0.01218534		4201.17	-0.00506428
491.4	-0.02992492		1021.39	-0.01260195		1551.39	-0.00577144		2081.38	-0.00960323		2611.38	-0.01574733		3141.37	-0.00487748		3671.37	-0.01198641		4201.37	-0.00512083
491.6	-0.02964941		1021.59	-0.01290014		1551.59	-0.00496572		2081.58	-0.00918749		2611.58	-0.01591415		3141.57	-0.00513718		3671.57	-0.01194956		4201.57	-0.00578771
491.8	-0.0301395		1021.79	-0.01241408		1551.79	-0.00544872		2081.78	-0.00895532		2611.78	-0.0155987		3141.77	-0.00592454		3671.77	-0.01172916		4201.77	-0.00542626
492	-0.03003293		1021.99	-0.0129883		1551.99	-0.004422		2081.98	-0.00998647		2611.98	-0.01597925		3141.97	-0.00534898		3671.97	-0.01175329		4201.97	-0.00553721
492.2	-0.03077649		1022.19	-0.01328447		1552.19	-0.00551918		2082.18	-0.00957691		2612.18	-0.01609138		3142.17	-0.00504241		3672.17	-0.01220141		4202.17	-0.00616995
492.4	-0.03186491		1022.39	-0.01458826		1552.39	-0.00622652		2082.38	-0.01025952		2612.38	-0.01610218		3142.37	-0.00488414		3672.37	-0.01202419		4202.37	-0.00599305
492.6	-0.03192436		1022.59	-0.01519669		1552.59	-0.00683897		2082.58	-0.01124734		2612.58	-0.01640074		3142.57	-0.0055872		3672.57	-0.0125967		4202.57	-0.00558574
492.8	-0.03167342		1022.79	-0.01462704		1552.79	-0.00708829		2082.78	-0.01161877		2612.78	-0.01681091		3142.77	-0.00628927		3672.77	-0.01360756		4202.77	-0.00568428
493	-0.03280124		1022.99	-0.01409332		1552.99	-0.007692		2082.98	-0.01061097		2612.98	-0.01730324		3142.97	-0.00592556		3672.97	-0.01340895		4202.97	-0.00629345
493.2	-0.03276992		1023.19	-0.01312721		1553.19	-0.00789199		2083.18	-0.01003979		2613.18	-0.01764509		3143.17	-0.00621885		3673.17	-0.01319305		4203.17	-0.00680088
493.4	-0.03283129		1023.39	-0.01210356		1553.39	-0.00762412		2083.38	-0.00985621		2613.38	-0.01741733		3143.37	-0.00712581		3673.37	-0.01307241		4203.37	-0.00757361
493.6	-0.03359273		1023.59	-0.01171513		1553.59	-0.0073993		2083.58	-0.01008072		2613.58	-0.0174596		3143.57	-0.00747865		3673.57	-0.01208814		4203.57	-0.00767277
493.8	-0.033091		1023.79	-0.01107469		1553.79	-0.006801		2083.78	-0.00933834		2613.78	-0.01876103		3143.77	-0.00681451		3673.77	-0.01129646		4203.77	-0.00800256
494	-0.03310887		1023.99	-0.01157057		1553.99	-0.00656393		2083.98	-0.01013731		2613.98	-0.01904524		3143.97	-0.00633511		3673.97	-0.01116372		4203.97	-0.0074817
494.2	-0.0330449		1024.19	-0.01136568		1554.19	-0.00574375		2084.18	-0.0088595		2614.18	-0.01895588		3144.17	-0.00666017		3674.17	-0.01084384		4204.17	-0.00672295
494.4	-0.03161879		1024.39	-0.01045239		1554.39	-0.00464489		2084.38	-0.00944114		2614.38	-0.01903669		3144.37	-0.00669019		3674.37	-0.00949584		4204.37	-0.00559549
494.6	-0.03120461		1024.59	-0.01069781		1554.59	-0.00444421		2084.58	-0.00998811		2614.58	-0.01878702		3144.57	-0.00683356		3674.57	-0.00907251		4204.57	-0.004965
494.8	-0.03073971		1024.79	-0.01038798		1554.79	-0.00399882		2084.78	-0.00986601		2614.78	-0.01999869		3144.77	-0.00688994		3674.77	-0.00931443		4204.77	-0.00436012
495	-0.03021227		1024.99	-0.0109292		1554.99	-0.00391141		2084.98	-0.00948167		2614.98	-0.01938748		3144.97	-0.00723657		3674.97	-0.00859846		4204.97	-0.00479108
495.2	-0.02990128		1025.19	-0.01122632		1555.19	-0.00382358		2085.18	-0.0094782		2615.18	-0.02041666		3145.17	-0.0069018		3675.17	-0.008157		4205.17	-0.00386176
495.4	-0.02938918		1025.39	-0.01139886		1555.39	-0.0047319		2085.38	-0.00868405		2615.38	-0.02031236		3145.37	-0.00648323		3675.37	-0.00797398		4205.37	-0.00327751
495.6	-0.03008758		1025.59	-0.01147638		1555.59	-0.00510154		2085.58	-0.00902524		2615.58	-0.02029086		3145.57	-0.00680386		3675.57	-0.00863774		4205.57	-0.00272128
495.8	-0.03019672		1025.79	-0.0114056		1555.79	-0.00478328		2085.78	-0.00954072		2615.78	-0.02005207		3145.77	-0.00741556		3675.77	-0.00924653		4205.77	-0.00277916
496	-0.03056668		1025.99	-0.01241614		1555.99	-0.00456848		2085.98	-0.00985661		2615.98	-0.01967432		3145.97	-0.00697928		3675.97	-0.01026748		4205.97	-0.00301632
496.2	-0.03139391		1026.19	-0.01341296		1556.19	-0.00580871		2086.18	-0.0095216		2616.18	-0.01907324		3146.17	-0.00655039		3676.17	-0.01075097		4206.17	-0.00293952
496.4	-0.03254532		1026.39	-0.014115		1556.39	-0.00582993		2086.38	-0.01003108		2616.38	-0.0185381		3146.37	-0.00628699		3676.37	-0.01078263		4206.37	-0.00341878
496.6	-0.03215676		1026.59	-0.01446421		1556.59	-0.00625424		2086.58	-0.01024023		2616.58	-0.01889712		3146.57	-0.005624		3676.57	-0.01091627		4206.57	-0.00381382
496.8	-0.03272102		1026.79	-0.01437917		1556.79	-0.00664941		2086.78	-0.01039287		2616.78	-0.01897565		3146.77	-0.00490289		3676.77	-0.01196397		4206.77	-0.00481873
497	-0.03290303		1026.99	-0.01453393		1556.99	-0.0070129		2086.98	-0.01008036		2616.98	-0.0189144		3146.97	-0.00485855		3676.97	-0.01158364		4206.97	-0.00537219
497.2	-0.03228764		1027.19	-0.01452647		1557.19	-0.00678711		2087.18	-0.00961494		2617.18	-0.01913626		3147.17	-0.00455902		3677.17	-0.01227865		4207.17	-0.00647856
497.4	-0.03242964		1027.39	-0.01493526		1557.39	-0.00713249		2087.38	-0.00971158		2617.38	-0.019915		3147.37	-0.00403236		3677.37	-0.01224664		4207.37	-0.00691055
497.6	-0.03278368		1027.59	-0.01550388		1557.59	-0.00733018		2087.58	-0.00970214		2617.58	-0.02041596		3147.57	-0.00319552		3677.57	-0.01188176		4207.57	-0.00732906
497.8	-0.03189912		1027.79	-0.01567411		1557.79	-0.00671293		2087.78	-0.00954197		2617.78	-0.02020585		3147.77	-0.00262462		3677.77	-0.01150789		4207.77	-0.00770212
498	-0.03193257		1027.99	-0.01574158		1557.99	-0.00708937		2087.98	-0.00980992		2617.98	-0.01944402		3147.97	-0.00283795		3677.97	-0.01162108		4207.97	-0.00734565
498.2	-0.03159035		1028.19	-0.01547434		1558.19	-0.00602037		2088.18	-0.00946834		2618.18	-0.01880981		3148.17	-0.00271123		3678.17	-0.01147076		4208.17	-0.00762874
498.4	-0.03025835		1028.39	-0.01604388		1558.39	-0.00590003		2088.38	-0.00995181		2618.38	-0.01929708		3148.37	-0.00271462		3678.37	-0.0104804		4208.37	-0.00676343
498.6	-0.03006891		1028.59	-0.01660836		1558.59	-0.00672159		2088.58	-0.0099324		2618.58	-0.01859555		3148.57	-0.00393886		3678.57	-0.01107203		4208.57	-0.00715383
498.8	-0.02971465		1028.79	-0.01584154		1558.79	-0.00640278		2088.78	-0.00990089		2618.78	-0.01855765		3148.77	-0.00501153		3678.77	-0.01069768		4208.77	-0.00718628
499	-0.03046386		1028.99	-0.01598989		1558.99	-0.00629225		2088.98	-0.00917602		2618.98	-0.01741526		3148.97	-0.00611277		3678.97	-0.01044627		4208.97	-0.00659478
499.2	-0.03049332		1029.19	-0.01467993		1559.19	-0.00604112		2089.18	-0.00938111		2619.18	-0.01806079		3149.17	-0.00639486		3679.17	-0.01119814		4209.17	-0.00659265
499.4	-0.030603		1029.39	-0.01447191		1559.39	-0.00599152		2089.38	-0.00894757		2619.38	-0.01712931		3149.37	-0.00720886		3679.37	-0.01137669		4209.37	-0.00624035
499.6	-0.03124174		1029.59	-0.01349266		1559.59	-0.00498925		2089.58	-0.00980979		2619.58	-0.01714873		3149.57	-0.00813561		3679.57	-0.01157167		4209.57	-0.00583666
499.8	-0.03118691		1029.79	-0.01274452		1559.79	-0.00480137		2089.78	-0.01040739		2619.78	-0.01623394		3149.77	-0.00899667		3679.77	-0.01154851		4209.77	-0.00623066
500	-0.03085053		1029.99	-0.0135951		1559.99	-0.00531943		2089.98	-0.01022407		2619.98	-0.01685274		3149.97	-0.00926282		3679.97	-0.01090079		4209.97	-0.00624143
500.2	-0.03073705		1030.19	-0.01346897		1560.19	-0.0051829		2090.18	-0.00990667		2620.18	-0.0175532		3150.17	-0.01039969		3680.17	-0.01018305		4210.17	-0.00633556
500.4	-0.03075483		1030.39	-0.01246343		1560.39	-0.00490595		2090.38	-0.01051491		2620.38	-0.01816498		3150.37	-0.01067998		3680.37	-0.01019165		4210.37	-0.00704609
500.6	-0.03060729		1030.59	-0.01300048		1560.59	-0.00506033		2090.58	-0.01014533		2620.58	-0.01814191		3150.57	-0.01077053		3680.57	-0.01049987		4210.57	-0.00693799
500.8	-0.03076012		1030.79	-0.01307113		1560.79	-0.00513493		2090.78	-0.01100165		2620.78	-0.01867428		3150.77	-0.01084447		3680.77	-0.01126208		4210.77	-0.00746445
501	-0.02963068		1030.99	-0.01336747		1560.99	-0.00537288		2090.98	-0.01066143		2620.98	-0.01920603		3150.97	-0.01085195		3680.97	-0.01109062		4210.97	-0.00713484
501.2	-0.02927502		1031.19	-0.01355346		1561.19	-0.00506536		2091.18	-0.01091006		2621.18	-0.02033033		3151.17	-0.00914809		3681.17	-0.011136		4211.17	-0.00790052
501.4	-0.02904631		1031.39	-0.01388605		1561.39	-0.00467281		2091.38	-0.01177633		2621.38	-0.02093261		3151.37	-0.00796247		3681.37	-0.01113791		4211.37	-0.00854161
501.6	-0.02918635		1031.59	-0.01407137		1561.59	-0.00431463		2091.58	-0.01221143		2621.58	-0.02085732		3151.57	-0.0070345		3681.57	-0.01119618		4211.57	-0.00859832
501.8	-0.02894383		1031.79	-0.014269		1561.79	-0.00319579		2091.78	-0.01256251		2621.78	-0.02097959		3151.77	-0.00632484		3681.77	-0.0113836		4211.77	-0.00836563
502	-0.02958381		1031.99	-0.01519535		1561.99	-0.00378215		2091.98	-0.01204262		2621.98	-0.02111482		3151.97	-0.00576164		3681.97	-0.01202259		4211.97	-0.00871594
502.2	-0.02919376		1032.19	-0.01588992		1562.19	-0.00295986		2092.18	-0.01201442		2622.18	-0.02054352		3152.17	-0.00466895		3682.17	-0.0119434		4212.17	-0.00905821
502.4	-0.02906571		1032.39	-0.01587486		1562.39	-0.00252482		2092.38	-0.01181811		2622.38	-0.02099599		3152.37	-0.00434102		3682.37	-0.01231198		4212.37	-0.00841004
502.6	-0.02981223		1032.59	-0.01509281		1562.59	-0.00250077		2092.58	-0.01144365		2622.58	-0.02007161		3152.57	-0.003915		3682.57	-0.01295051		4212.57	-0.00818589
502.8	-0.03089969		1032.79	-0.01500353		1562.79	-0.00200373		2092.78	-0.0114166		2622.78	-0.02006731		3152.77	-0.00313901		3682.77	-0.01255346		4212.77	-0.0073928
503	-0.03197008		1032.99	-0.01497706		1562.99	-0.00192302		2092.98	-0.01071695		2622.98	-0.01983666		3152.97	-0.00264073		3682.97	-0.01328734		4212.97	-0.00703111
503.2	-0.03244857		1033.19	-0.01426628		1563.19	-0.0020143		2093.18	-0.01096659		2623.18	-0.01932801		3153.17	-0.00260528		3683.17	-0.01338514		4213.17	-0.0069899
503.4	-0.03289194		1033.39	-0.01414221		1563.39	-0.00153084		2093.38	-0.01106488		2623.38	-0.01825506		3153.37	-0.00265734		3683.37	-0.01389202		4213.37	-0.00615125
503.6	-0.03333325		1033.59	-0.01395314		1563.59	-0.00174787		2093.58	-0.01178289		2623.58	-0.01769922		3153.57	-0.0027034		3683.57	-0.01436655		4213.57	-0.00632437
503.8	-0.03381462		1033.79	-0.01413599		1563.79	-0.00263558		2093.78	-0.01235198		2623.78	-0.01750542		3153.77	-0.003653		3683.77	-0.01355071		4213.77	-0.00666252
504	-0.03376146		1033.99	-0.0132794		1563.99	-0.00236327		2093.98	-0.01215359		2623.98	-0.01851027		3153.97	-0.00494957		3683.97	-0.01402541		4213.97	-0.00674386
504.2	-0.03367093		1034.19	-0.01256829		1564.19	-0.0019349		2094.18	-0.01188822		2624.18	-0.01841372		3154.17	-0.00598088		3684.17	-0.01484168		4214.17	-0.00681202
504.4	-0.03447342		1034.39	-0.01272938		1564.39	-0.0024631		2094.38	-0.01194717		2624.38	-0.01834193		3154.37	-0.00716665		3684.37	-0.0151454		4214.37	-0.00665843
504.6	-0.03423729		1034.59	-0.01419098		1564.59	-0.00275589		2094.58	-0.01230017		2624.58	-0.01845218		3154.57	-0.00755987		3684.57	-0.01523512		4214.57	-0.00636329
504.8	-0.03407869		1034.79	-0.01495263		1564.79	-0.00290748		2094.78	-0.01274837		2624.78	-0.01884381		3154.77	-0.00848168		3684.77	-0.01504879		4214.77	-0.00563536
505	-0.03401676		1034.99	-0.01485195		1564.99	-0.00294565		2094.98	-0.01324095		2624.98	-0.0191291		3154.97	-0.00793103		3684.97	-0.01496686		4214.97	-0.00617542
505.2	-0.03376163		1035.19	-0.01479549		1565.19	-0.00314206		2095.18	-0.01483654		2625.18	-0.01928485		3155.17	-0.00794442		3685.17	-0.01398559		4215.17	-0.00635096
505.4	-0.03383736		1035.39	-0.0149898		1565.39	-0.0035641		2095.38	-0.01518925		2625.38	-0.01988547		3155.37	-0.00844581		3685.37	-0.01351177		4215.37	-0.00606678
505.6	-0.03437618		1035.59	-0.01578189		1565.59	-0.00404611		2095.58	-0.01507494		2625.58	-0.02059865		3155.57	-0.00938952		3685.57	-0.01235581		4215.57	-0.00518937
505.8	-0.03425909		1035.79	-0.0159976		1565.79	-0.00422353		2095.78	-0.01473317		2625.78	-0.02132494		3155.77	-0.00983805		3685.77	-0.01149438		4215.77	-0.00518268
506	-0.0345784		1035.99	-0.0167036		1565.99	-0.0048407		2095.98	-0.01363444		2625.98	-0.0221029		3155.97	-0.0097665		3685.97	-0.01119597		4215.97	-0.00613901
506.2	-0.03394713		1036.19	-0.01679812		1566.19	-0.00468186		2096.18	-0.01296161		2626.18	-0.02134311		3156.17	-0.00987939		3686.17	-0.01049796		4216.17	-0.00661622
506.4	-0.03434343		1036.39	-0.01700781		1566.39	-0.00520999		2096.38	-0.01259644		2626.38	-0.02140389		3156.37	-0.00952633		3686.37	-0.01038076		4216.37	-0.00639387
506.6	-0.03371537		1036.59	-0.01683409		1566.59	-0.0050741		2096.58	-0.0116255		2626.58	-0.02117487		3156.57	-0.00888501		3686.57	-0.00970044		4216.57	-0.0059523
506.8	-0.03303847		1036.79	-0.01675702		1566.79	-0.00524087		2096.78	-0.0115716		2626.78	-0.02156437		3156.77	-0.00856869		3686.77	-0.00913603		4216.77	-0.00572289
507	-0.0322743		1036.99	-0.01568775		1566.99	-0.00544511		2096.98	-0.01028558		2626.98	-0.02120648		3156.97	-0.00855052		3686.97	-0.01013196		4216.97	-0.00589656
507.2	-0.03229725		1037.19	-0.01460063		1567.19	-0.00552365		2097.18	-0.0097096		2627.18	-0.02080645		3157.17	-0.00865659		3687.17	-0.01055624		4217.17	-0.00646523
507.4	-0.0311423		1037.39	-0.01461486		1567.39	-0.0056893		2097.38	-0.01014461		2627.38	-0.02045706		3157.37	-0.00863806		3687.37	-0.01159975		4217.37	-0.00710867
507.6	-0.03100626		1037.59	-0.01506172		1567.59	-0.00630586		2097.58	-0.00988964		2627.58	-0.01980312		3157.57	-0.00861519		3687.57	-0.01156169		4217.57	-0.00686695
507.8	-0.03101476		1037.79	-0.01472232		1567.79	-0.00666705		2097.78	-0.01005584		2627.78	-0.02030765		3157.77	-0.00900074		3687.77	-0.01160709		4217.77	-0.0062109
508	-0.03077787		1037.99	-0.01326259		1567.99	-0.00582929		2097.98	-0.00985891		2627.98	-0.0197543		3157.97	-0.00879101		3687.97	-0.01309245		4217.97	-0.00695908
508.2	-0.030512		1038.19	-0.01337946		1568.19	-0.00513322		2098.18	-0.00933376		2628.18	-0.01975011		3158.17	-0.00862067		3688.17	-0.01284133		4218.17	-0.00741287
508.4	-0.03058254		1038.39	-0.01341092		1568.39	-0.0057842		2098.38	-0.0097171		2628.38	-0.01923597		3158.37	-0.00904082		3688.37	-0.01290786		4218.37	-0.00764799
508.6	-0.03083395		1038.59	-0.01424348		1568.59	-0.00534841		2098.58	-0.01093687		2628.58	-0.01917617		3158.57	-0.00789506		3688.57	-0.01318676		4218.57	-0.0075131
508.8	-0.03101414		1038.79	-0.01431442		1568.79	-0.00491453		2098.78	-0.01104175		2628.78	-0.01861161		3158.77	-0.00755423		3688.77	-0.01289344		4218.77	-0.00793059
509	-0.03080463		1038.99	-0.01384218		1568.99	-0.00528795		2098.98	-0.01215749		2628.98	-0.0188004		3158.97	-0.00625381		3688.97	-0.01328572		4218.97	-0.00834905
509.2	-0.03105472		1039.19	-0.0143214		1569.19	-0.00595786		2099.18	-0.01238426		2629.18	-0.01847761		3159.17	-0.00694021		3689.17	-0.01303387		4219.17	-0.00765297
509.4	-0.03195182		1039.39	-0.0147815		1569.39	-0.00646328		2099.38	-0.01188069		2629.38	-0.01908082		3159.37	-0.00725793		3689.37	-0.01281033		4219.37	-0.00741354
509.6	-0.03322933		1039.59	-0.01508909		1569.59	-0.0067624		2099.58	-0.01158049		2629.58	-0.0195445		3159.57	-0.00802948		3689.57	-0.01270544		4219.57	-0.00736956
509.8	-0.0335526		1039.79	-0.0143716		1569.79	-0.00728442		2099.78	-0.01144504		2629.78	-0.01984728		3159.77	-0.00719904		3689.77	-0.01292954		4219.77	-0.00780792
510	-0.03342025		1039.99	-0.01503663		1569.99	-0.00676503		2099.98	-0.01142548		2629.98	-0.02011444		3159.97	-0.00645877		3689.97	-0.01349336		4219.97	-0.00836245
510.2	-0.03293769		1040.19	-0.0152256		1570.19	-0.00702143		2100.18	-0.01126072		2630.18	-0.01833181		3160.17	-0.0067396		3690.17	-0.01284936		4220.17	-0.00857637
510.4	-0.03245659		1040.39	-0.01489772		1570.39	-0.00709185		2100.38	-0.01070464		2630.38	-0.01830797		3160.37	-0.00598311		3690.37	-0.01298878		4220.37	-0.00758436
510.6	-0.03125867		1040.59	-0.01474355		1570.59	-0.0066235		2100.58	-0.01022948		2630.58	-0.01850376		3160.57	-0.0056275		3690.57	-0.01191978		4220.57	-0.00652182
510.8	-0.03086915		1040.79	-0.01410478		1570.79	-0.00722546		2100.78	-0.00952392		2630.78	-0.01877729		3160.77	-0.00592935		3690.77	-0.01182789		4220.77	-0.00560707
511	-0.0305855		1040.99	-0.01380239		1570.99	-0.00774553		2100.98	-0.00892975		2630.98	-0.01891024		3160.97	-0.0062166		3690.97	-0.01210198		4220.97	-0.00580821
511.2	-0.03092802		1041.19	-0.01381322		1571.19	-0.00842551		2101.18	-0.00873437		2631.18	-0.01870097		3161.17	-0.00652544		3691.17	-0.01192536		4221.17	-0.00629973
511.4	-0.03049331		1041.39	-0.01537175		1571.39	-0.00773546		2101.38	-0.0091069		2631.38	-0.01807466		3161.37	-0.00594388		3691.37	-0.01275381		4221.37	-0.00524197
511.6	-0.03065276		1041.59	-0.01587526		1571.59	-0.00783472		2101.58	-0.00901832		2631.58	-0.01801584		3161.57	-0.00547765		3691.57	-0.01258862		4221.57	-0.00446812
511.8	-0.03121017		1041.79	-0.01492132		1571.79	-0.00730153		2101.78	-0.00873174		2631.78	-0.01897132		3161.77	-0.0056492		3691.77	-0.01339591		4221.77	-0.00424594
512	-0.03106779		1041.99	-0.0142916		1571.99	-0.00620705		2101.98	-0.00995432		2631.98	-0.01909275		3161.97	-0.00526023		3691.97	-0.01363152		4221.97	-0.00557965
512.2	-0.03073843		1042.19	-0.01482335		1572.19	-0.00613116		2102.18	-0.01019814		2632.18	-0.01952092		3162.17	-0.00524586		3692.17	-0.0139922		4222.17	-0.00567733
512.4	-0.03087935		1042.39	-0.01492643		1572.39	-0.00600818		2102.38	-0.01092615		2632.38	-0.01894515		3162.37	-0.00586746		3692.37	-0.01441627		4222.37	-0.00550548
512.6	-0.03137997		1042.59	-0.01551396		1572.59	-0.00550331		2102.58	-0.01155915		2632.58	-0.0194792		3162.57	-0.00589472		3692.57	-0.01491085		4222.57	-0.00614062
512.8	-0.03152542		1042.79	-0.01563745		1572.79	-0.00579627		2102.78	-0.01150346		2632.78	-0.01912529		3162.77	-0.00643913		3692.77	-0.01567339		4222.77	-0.00632998
513	-0.03200599		1042.99	-0.01566422		1572.99	-0.00581782		2102.98	-0.01152856		2632.98	-0.02001722		3162.97	-0.0068195		3692.97	-0.01667678		4222.97	-0.00646393
513.2	-0.03327148		1043.19	-0.01598984		1573.19	-0.00550386		2103.18	-0.0113376		2633.18	-0.01999925		3163.17	-0.00770354		3693.17	-0.01749802		4223.17	-0.00766649
513.4	-0.03383431		1043.39	-0.01626906		1573.39	-0.00618479		2103.38	-0.01129286		2633.38	-0.02030682		3163.37	-0.00868415		3693.37	-0.01758245		4223.37	-0.00824417
513.6	-0.03370304		1043.59	-0.01595789		1573.59	-0.00593433		2103.58	-0.01195447		2633.58	-0.0201385		3163.57	-0.00869158		3693.57	-0.01812479		4223.57	-0.0080097
513.8	-0.0331017		1043.79	-0.01657414		1573.79	-0.00606255		2103.78	-0.0125353		2633.78	-0.02020614		3163.77	-0.00805898		3693.77	-0.01820702		4223.77	-0.00834875
514	-0.03288761		1043.99	-0.01633752		1573.99	-0.00581794		2103.98	-0.0126012		2633.98	-0.02042386		3163.97	-0.00789923		3693.97	-0.01800817		4223.97	-0.00848335
514.2	-0.03236837		1044.19	-0.01594068		1574.19	-0.00583344		2104.18	-0.01280554		2634.18	-0.01944454		3164.17	-0.00830463		3694.17	-0.01699608		4224.17	-0.00792251
514.4	-0.03194124		1044.39	-0.01580234		1574.39	-0.00601298		2104.38	-0.01259948		2634.38	-0.0203652		3164.37	-0.00720856		3694.37	-0.01667184		4224.37	-0.00704881
514.6	-0.0310299		1044.59	-0.01607961		1574.59	-0.00597376		2104.58	-0.01340844		2634.58	-0.02061032		3164.57	-0.00752604		3694.57	-0.01506442		4224.57	-0.00673668
514.8	-0.03127265		1044.79	-0.01537822		1574.79	-0.00589453		2104.78	-0.01296743		2634.78	-0.02046582		3164.77	-0.00767886		3694.77	-0.01491115		4224.77	-0.00703875
515	-0.03132334		1044.99	-0.01535062		1574.99	-0.006235		2104.98	-0.01359969		2634.98	-0.02047408		3164.97	-0.00720604		3694.97	-0.01472202		4224.97	-0.00738923
515.2	-0.03097744		1045.19	-0.0146825		1575.19	-0.00669991		2105.18	-0.01330095		2635.18	-0.02041265		3165.17	-0.00662481		3695.17	-0.01439974		4225.17	-0.00770501
515.4	-0.03125513		1045.39	-0.0145329		1575.39	-0.00617367		2105.38	-0.01382564		2635.38	-0.02107393		3165.37	-0.00639001		3695.37	-0.013754		4225.37	-0.00702298
515.6	-0.03171276		1045.59	-0.01356034		1575.59	-0.0068959		2105.58	-0.01428051		2635.58	-0.02152632		3165.57	-0.00673997		3695.57	-0.01322576		4225.57	-0.00690092
515.8	-0.03170773		1045.79	-0.01307066		1575.79	-0.00641388		2105.78	-0.01402666		2635.78	-0.02169918		3165.77	-0.00668999		3695.77	-0.01329555		4225.77	-0.00671154
516	-0.03135463		1045.99	-0.01413625		1575.99	-0.00686315		2105.98	-0.01474771		2635.98	-0.02085221		3165.97	-0.00669098		3695.97	-0.01313059		4225.97	-0.00709772
516.2	-0.03188136		1046.19	-0.01302583		1576.19	-0.00705565		2106.18	-0.01367993		2636.18	-0.02042394		3166.17	-0.00748262		3696.17	-0.01312506		4226.17	-0.00686301
516.4	-0.03236773		1046.39	-0.01281016		1576.39	-0.00662667		2106.38	-0.01306775		2636.38	-0.01974185		3166.37	-0.00833705		3696.37	-0.01300064		4226.37	-0.00785509
516.6	-0.03315709		1046.59	-0.01300057		1576.59	-0.00696422		2106.58	-0.01239505		2636.58	-0.01952698		3166.57	-0.00925878		3696.57	-0.01299266		4226.57	-0.00925725
516.8	-0.03410326		1046.79	-0.01322001		1576.79	-0.0068822		2106.78	-0.01141003		2636.78	-0.01949827		3166.77	-0.01021906		3696.77	-0.01305487		4226.77	-0.00958406
517	-0.03431441		1046.99	-0.01382876		1576.99	-0.00570551		2106.98	-0.01073769		2636.98	-0.0197157		3166.97	-0.01005444		3696.97	-0.01314928		4226.97	-0.01022458
517.2	-0.03430956		1047.19	-0.01393705		1577.19	-0.00553158		2107.18	-0.01079745		2637.18	-0.01892374		3167.17	-0.01046698		3697.17	-0.0126405		4227.17	-0.01050941
517.4	-0.03407093		1047.39	-0.01473066		1577.39	-0.00571221		2107.38	-0.01086956		2637.38	-0.01789023		3167.37	-0.01154766		3697.37	-0.01202236		4227.37	-0.0104041
517.6	-0.03409157		1047.59	-0.01485953		1577.59	-0.00480081		2107.58	-0.01103537		2637.58	-0.01768318		3167.57	-0.01071313		3697.57	-0.01255908		4227.57	-0.01106769
517.8	-0.03450012		1047.79	-0.01534582		1577.79	-0.00468288		2107.78	-0.01129152		2637.78	-0.01780903		3167.77	-0.01019273		3697.77	-0.01286817		4227.77	-0.01162654
518	-0.03528339		1047.99	-0.01471081		1577.99	-0.00416985		2107.98	-0.01099488		2637.98	-0.01804556		3167.97	-0.0093132		3697.97	-0.01276071		4227.97	-0.01134644
518.2	-0.03511533		1048.19	-0.01521072		1578.19	-0.00393945		2108.18	-0.01126823		2638.18	-0.01756973		3168.17	-0.00860529		3698.17	-0.01317103		4228.17	-0.01090011
518.4	-0.03526916		1048.39	-0.01529799		1578.39	-0.00379923		2108.38	-0.01147947		2638.38	-0.01845278		3168.37	-0.00734722		3698.37	-0.01362789		4228.37	-0.01061914
518.6	-0.03530146		1048.59	-0.01550455		1578.59	-0.00363584		2108.58	-0.01207254		2638.58	-0.01813233		3168.57	-0.00751075		3698.57	-0.01305328		4228.57	-0.01084959
518.8	-0.03546274		1048.79	-0.01513711		1578.79	-0.00337586		2108.78	-0.01185944		2638.78	-0.01834176		3168.77	-0.00712985		3698.77	-0.01439963		4228.77	-0.01098067
519	-0.03486524		1048.99	-0.01462609		1578.99	-0.00329301		2108.98	-0.01276768		2638.98	-0.01888691		3168.97	-0.00621189		3698.97	-0.0144917		4228.97	-0.00988066
519.2	-0.03464952		1049.19	-0.01409634		1579.19	-0.0032465		2109.18	-0.01254443		2639.18	-0.01930073		3169.17	-0.00653189		3699.17	-0.0141089		4229.17	-0.00974125
519.4	-0.03485888		1049.39	-0.01394094		1579.39	-0.00277244		2109.38	-0.01263675		2639.38	-0.02042113		3169.37	-0.00698546		3699.37	-0.01443555		4229.37	-0.00890076
519.6	-0.03455304		1049.59	-0.01409039		1579.59	-0.00352079		2109.58	-0.01250561		2639.58	-0.02064565		3169.57	-0.00697856		3699.57	-0.01499973		4229.57	-0.00786236
519.8	-0.03378825		1049.79	-0.01410288		1579.79	-0.00398837		2109.78	-0.01165029		2639.78	-0.02028611		3169.77	-0.00733172		3699.77	-0.01558479		4229.77	-0.00781342
520	-0.03375175		1049.99	-0.01374692		1579.99	-0.00492367		2109.98	-0.01153993		2639.98	-0.02030642		3169.97	-0.00748876		3699.97	-0.01607917		4229.97	-0.00761814
520.2	-0.03314717		1050.19	-0.01250415		1580.19	-0.00475578		2110.18	-0.0103256		2640.18	-0.02127628		3170.17	-0.00905819		3700.17	-0.01591051		4230.17	-0.00795935
520.4	-0.0319657		1050.39	-0.01254127		1580.39	-0.00517616		2110.38	-0.00996787		2640.38	-0.02146191		3170.37	-0.00977355		3700.37	-0.01608739		4230.37	-0.00908413
520.6	-0.03200289		1050.59	-0.01217231		1580.59	-0.00625779		2110.58	-0.00987553		2640.58	-0.02175677		3170.57	-0.010811		3700.57	-0.01498958		4230.57	-0.00977349
520.8	-0.03146782		1050.79	-0.01174241		1580.79	-0.00631699		2110.78	-0.01004732		2640.78	-0.02233542		3170.77	-0.01115948		3700.77	-0.01502764		4230.77	-0.00926605
521	-0.03094219		1050.99	-0.01186862		1580.99	-0.00635453		2110.98	-0.01105626		2640.98	-0.02221406		3170.97	-0.01079248		3700.97	-0.01479831		4230.97	-0.00974497
521.2	-0.0320643		1051.19	-0.01131605		1581.19	-0.00674245		2111.18	-0.01159694		2641.18	-0.02265033		3171.17	-0.01131948		3701.17	-0.01405553		4231.17	-0.00963115
521.4	-0.03264907		1051.39	-0.01217107		1581.39	-0.00670942		2111.38	-0.01155371		2641.38	-0.02242942		3171.37	-0.01115061		3701.37	-0.01439818		4231.37	-0.01035288
521.6	-0.03336452		1051.59	-0.0117751		1581.59	-0.00640657		2111.58	-0.01200187		2641.58	-0.0229156		3171.57	-0.00956055		3701.57	-0.01509086		4231.57	-0.01073277
521.8	-0.03430035		1051.79	-0.0120943		1581.79	-0.00718525		2111.78	-0.01246244		2641.78	-0.02289702		3171.77	-0.00988516		3701.77	-0.01541766		4231.77	-0.0097833
522	-0.03558084		1051.99	-0.01238059		1581.99	-0.00646599		2111.98	-0.01274849		2641.98	-0.02292795		3171.97	-0.00965204		3701.97	-0.01487175		4231.97	-0.01036597
522.2	-0.03632851		1052.19	-0.0130733		1582.19	-0.00664494		2112.18	-0.01323943		2642.18	-0.02316358		3172.17	-0.00957536		3702.17	-0.01503213		4232.17	-0.01009491
522.4	-0.0370652		1052.39	-0.01318375		1582.39	-0.00617499		2112.38	-0.01362138		2642.38	-0.02376293		3172.37	-0.00861963		3702.37	-0.01492061		4232.37	-0.00973524
522.6	-0.03757341		1052.59	-0.01394462		1582.59	-0.00677665		2112.58	-0.01404781		2642.58	-0.02371649		3172.57	-0.00833174		3702.57	-0.01551814		4232.57	-0.01025548
522.8	-0.03798521		1052.79	-0.0144044		1582.79	-0.00673919		2112.78	-0.01464574		2642.78	-0.02412023		3172.77	-0.00778084		3702.77	-0.01538501		4232.77	-0.0100874
523	-0.03844559		1052.99	-0.01516756		1582.99	-0.00656646		2112.98	-0.01490791		2642.98	-0.02396351		3172.97	-0.00754656		3702.97	-0.01470376		4232.97	-0.00993305
523.2	-0.03844768		1053.19	-0.01609733		1583.19	-0.00646552		2113.18	-0.01368466		2643.18	-0.02385397		3173.17	-0.00845167		3703.17	-0.01464125		4233.17	-0.00969578
523.4	-0.03812453		1053.39	-0.01648235		1583.39	-0.00673306		2113.38	-0.01369672		2643.38	-0.02461522		3173.37	-0.00820516		3703.37	-0.01545994		4233.37	-0.00898025
523.6	-0.03732817		1053.59	-0.01650077		1583.59	-0.00785842		2113.58	-0.01374637		2643.58	-0.02403294		3173.57	-0.00799268		3703.57	-0.01503728		4233.57	-0.00840007
523.8	-0.03680689		1053.79	-0.01663015		1583.79	-0.00829675		2113.78	-0.01334945		2643.78	-0.02343132		3173.77	-0.00836932		3703.77	-0.01507651		4233.77	-0.00863514
524	-0.03605017		1053.99	-0.01662762		1583.99	-0.00855913		2113.98	-0.01266244		2643.98	-0.02398294		3173.97	-0.00845788		3703.97	-0.01496718		4233.97	-0.00846767
524.2	-0.03482312		1054.19	-0.01669426		1584.19	-0.00931464		2114.18	-0.01195207		2644.18	-0.02311424		3174.17	-0.0096388		3704.17	-0.01443284		4234.17	-0.00910484
524.4	-0.03442358		1054.39	-0.01623232		1584.39	-0.00976318		2114.38	-0.01193589		2644.38	-0.02265715		3174.37	-0.00963799		3704.37	-0.01372712		4234.37	-0.00913213
524.6	-0.03397825		1054.59	-0.01645579		1584.59	-0.00995335		2114.58	-0.01185726		2644.58	-0.02145765		3174.57	-0.00895252		3704.57	-0.01324586		4234.57	-0.0090489
524.8	-0.03326553		1054.79	-0.01615316		1584.79	-0.00895449		2114.78	-0.01182146		2644.78	-0.02144714		3174.77	-0.00898574		3704.77	-0.01309699		4234.77	-0.00898632
525	-0.033376		1054.99	-0.01670494		1584.99	-0.0087102		2114.98	-0.01199803		2644.98	-0.02055218		3174.97	-0.00873209		3704.97	-0.01334887		4234.97	-0.00974868
525.2	-0.0343212		1055.19	-0.01639945		1585.19	-0.00789817		2115.18	-0.01173867		2645.18	-0.02000754		3175.17	-0.00883888		3705.17	-0.01374995		4235.17	-0.00875534
525.4	-0.03358312		1055.39	-0.01733277		1585.39	-0.00780724		2115.38	-0.01202363		2645.38	-0.01959035		3175.37	-0.0085372		3705.37	-0.01454083		4235.37	-0.00891769
525.6	-0.03365627		1055.59	-0.01696998		1585.59	-0.00694418		2115.58	-0.01286624		2645.58	-0.0191425		3175.57	-0.0094897		3705.57	-0.01476336		4235.57	-0.00892011
525.8	-0.03420047		1055.79	-0.01734276		1585.79	-0.00648187		2115.78	-0.01286183		2645.78	-0.01920254		3175.77	-0.01026089		3705.77	-0.01387507		4235.77	-0.00999016
526	-0.03518009		1055.99	-0.01767405		1585.99	-0.00440343		2115.98	-0.01351551		2645.98	-0.0190298		3175.97	-0.00967795		3705.97	-0.01397699		4235.97	-0.01066468
526.2	-0.03537205		1056.19	-0.0176723		1586.19	-0.00471938		2116.18	-0.01387906		2646.18	-0.01966575		3176.17	-0.00904327		3706.17	-0.0146921		4236.17	-0.01105304
526.4	-0.0359095		1056.39	-0.0180365		1586.39	-0.00457624		2116.38	-0.01326138		2646.38	-0.019856		3176.37	-0.00793344		3706.37	-0.01548731		4236.37	-0.0118946
526.6	-0.03619463		1056.59	-0.01858478		1586.59	-0.00430945		2116.58	-0.01362291		2646.58	-0.01928308		3176.57	-0.00821686		3706.57	-0.01594932		4236.57	-0.01197558
526.8	-0.03681172		1056.79	-0.01899896		1586.79	-0.00437524		2116.78	-0.01406544		2646.78	-0.01904384		3176.77	-0.00894157		3706.77	-0.0148862		4236.77	-0.01121343
527	-0.03666948		1056.99	-0.01971118		1586.99	-0.00412412		2116.98	-0.01366244		2646.98	-0.01796108		3176.97	-0.0093437		3706.97	-0.01522022		4236.97	-0.01147923
527.2	-0.03588955		1057.19	-0.01960362		1587.19	-0.00422233		2117.18	-0.01340443		2647.18	-0.01870701		3177.17	-0.00973079		3707.17	-0.0155863		4237.17	-0.01104828
527.4	-0.03636015		1057.39	-0.01899509		1587.39	-0.0043788		2117.38	-0.01382603		2647.38	-0.01948972		3177.37	-0.00864167		3707.37	-0.0164379		4237.37	-0.01080263
527.6	-0.03597329		1057.59	-0.01831833		1587.59	-0.00494547		2117.58	-0.01339527		2647.58	-0.02013278		3177.57	-0.00811363		3707.57	-0.01583595		4237.57	-0.01077412
527.8	-0.03638976		1057.79	-0.01785839		1587.79	-0.00547722		2117.78	-0.01251867		2647.78	-0.02070721		3177.77	-0.00756969		3707.77	-0.01541706		4237.77	-0.01105565
528	-0.03666441		1057.99	-0.01721799		1587.99	-0.00572455		2117.98	-0.0115315		2647.98	-0.02081389		3177.97	-0.00771898		3707.97	-0.01455258		4237.97	-0.0103185
528.2	-0.0370675		1058.19	-0.01738325		1588.19	-0.00611846		2118.18	-0.01156052		2648.18	-0.01970627		3178.17	-0.00730722		3708.17	-0.01373208		4238.17	-0.01054279
528.4	-0.03696772		1058.39	-0.01673204		1588.39	-0.0060617		2118.38	-0.01192536		2648.38	-0.01983666		3178.37	-0.00712114		3708.37	-0.0141572		4238.37	-0.01030156
528.6	-0.03660193		1058.59	-0.01602083		1588.59	-0.00612088		2118.58	-0.01161262		2648.58	-0.01962638		3178.57	-0.00607054		3708.57	-0.01379799		4238.57	-0.00991843
528.8	-0.03598296		1058.79	-0.01524843		1588.79	-0.00570293		2118.78	-0.01162241		2648.78	-0.01998558		3178.77	-0.00641665		3708.77	-0.01330925		4238.77	-0.0103144
529	-0.03685699		1058.99	-0.01500909		1588.99	-0.00650937		2118.98	-0.01198489		2648.98	-0.02006432		3178.97	-0.00605367		3708.97	-0.01352181		4238.97	-0.01002795
529.2	-0.0371711		1059.19	-0.01418926		1589.19	-0.00657564		2119.18	-0.01289855		2649.18	-0.02034335		3179.17	-0.00690538		3709.17	-0.0132103		4239.17	-0.01000696
529.4	-0.03648026		1059.39	-0.01398936		1589.39	-0.00722995		2119.38	-0.01296429		2649.38	-0.02091485		3179.37	-0.00743804		3709.37	-0.0124905		4239.37	-0.01081391
529.6	-0.03731484		1059.59	-0.01404697		1589.59	-0.00739245		2119.58	-0.01305943		2649.58	-0.02099768		3179.57	-0.00796067		3709.57	-0.01186388		4239.57	-0.01105145
529.8	-0.03761646		1059.79	-0.01383785		1589.79	-0.00751844		2119.78	-0.01272286		2649.78	-0.02064741		3179.77	-0.00756957		3709.77	-0.01141304		4239.77	-0.01174614
530	-0.03821637		1059.99	-0.01406132		1589.99	-0.00715544		2119.98	-0.01383132		2649.98	-0.02026395		3179.97	-0.007144		3709.97	-0.01220575		4239.97	-0.01190275
530.2	-0.03742136		1060.19	-0.01409374		1590.19	-0.00812979		2120.18	-0.01327779		2650.18	-0.01981834		3180.17	-0.00721977		3710.17	-0.01260944		4240.17	-0.01274862
530.4	-0.03730098		1060.39	-0.01479239		1590.39	-0.0081528		2120.38	-0.01370294		2650.38	-0.01962662		3180.37	-0.00772734		3710.37	-0.01308548		4240.37	-0.01209528
530.6	-0.03680341		1060.59	-0.01485685		1590.59	-0.00841928		2120.58	-0.01411843		2650.58	-0.01877661		3180.57	-0.0083111		3710.57	-0.01253443		4240.57	-0.01159513
530.8	-0.03737854		1060.79	-0.01622707		1590.79	-0.00929794		2120.78	-0.01501538		2650.78	-0.0187806		3180.77	-0.00843484		3710.77	-0.01289411		4240.77	-0.01176719
531	-0.03693874		1060.99	-0.01726643		1590.99	-0.00873026		2120.98	-0.015025		2650.98	-0.01854408		3180.97	-0.00789824		3710.97	-0.01391908		4240.97	-0.01264603
531.2	-0.03685311		1061.19	-0.01715673		1591.19	-0.00871842		2121.18	-0.0146314		2651.18	-0.01977594		3181.17	-0.00749879		3711.17	-0.01531861		4241.17	-0.0120922
531.4	-0.03751112		1061.39	-0.01754573		1591.39	-0.00780395		2121.38	-0.01424154		2651.38	-0.02045958		3181.37	-0.00686235		3711.37	-0.0165003		4241.37	-0.01162032
531.6	-0.03665548		1061.59	-0.0173721		1591.59	-0.00825449		2121.58	-0.01348868		2651.58	-0.021516		3181.57	-0.00674249		3711.57	-0.01619453		4241.57	-0.0112944
531.8	-0.03685819		1061.79	-0.01764124		1591.79	-0.00835632		2121.78	-0.01333382		2651.78	-0.02160195		3181.77	-0.00697363		3711.77	-0.01580262		4241.77	-0.01063196
532	-0.0375364		1061.99	-0.01749286		1591.99	-0.0079524		2121.98	-0.01289099		2651.98	-0.02094468		3181.97	-0.00753734		3711.97	-0.01580646		4241.97	-0.01008939
532.2	-0.03777546		1062.19	-0.01786077		1592.19	-0.00764855		2122.18	-0.01274778		2652.18	-0.02127567		3182.17	-0.00744518		3712.17	-0.01658385		4242.17	-0.01076681
532.4	-0.03791834		1062.39	-0.01735243		1592.39	-0.00800099		2122.38	-0.01245192		2652.38	-0.02205121		3182.37	-0.00781903		3712.37	-0.01720812		4242.37	-0.01048633
532.6	-0.03795941		1062.59	-0.01675752		1592.59	-0.00696772		2122.58	-0.01112544		2652.58	-0.02257911		3182.57	-0.00757173		3712.57	-0.01663789		4242.57	-0.00973825
532.8	-0.03752804		1062.79	-0.01749428		1592.79	-0.00631013		2122.78	-0.01107693		2652.78	-0.02303138		3182.77	-0.00696588		3712.77	-0.01631755		4242.77	-0.0096268
533	-0.0379154		1062.99	-0.01729604		1592.99	-0.00611132		2122.98	-0.01135146		2652.98	-0.02329431		3182.97	-0.00689169		3712.97	-0.01572738		4242.97	-0.00890795
533.2	-0.0378663		1063.19	-0.01729912		1593.19	-0.00581407		2123.18	-0.01217951		2653.18	-0.02301795		3183.17	-0.00698172		3713.17	-0.01532965		4243.17	-0.00885425
533.4	-0.03759956		1063.39	-0.01701804		1593.39	-0.00581439		2123.38	-0.01140067		2653.38	-0.02273215		3183.37	-0.0060009		3713.37	-0.01434611		4243.37	-0.00893953
533.6	-0.03761649		1063.59	-0.01676327		1593.59	-0.00601563		2123.58	-0.01128594		2653.58	-0.02202347		3183.57	-0.00567985		3713.57	-0.01427977		4243.57	-0.00860655
533.8	-0.03718906		1063.79	-0.01600501		1593.79	-0.00563657		2123.78	-0.01206088		2653.78	-0.02133162		3183.77	-0.0057826		3713.77	-0.013709		4243.77	-0.00900523
534	-0.03735035		1063.99	-0.01562102		1593.99	-0.00607513		2123.98	-0.01280645		2653.98	-0.02112627		3183.97	-0.0056594		3713.97	-0.01366114		4243.97	-0.00944409
534.2	-0.03710607		1064.19	-0.01567466		1594.19	-0.00711041		2124.18	-0.0133092		2654.18	-0.02016326		3184.17	-0.00568082		3714.17	-0.01417663		4244.17	-0.00896019
534.4	-0.0373603		1064.39	-0.01620057		1594.39	-0.00705287		2124.38	-0.01452022		2654.38	-0.02051482		3184.37	-0.00623429		3714.37	-0.01337779		4244.37	-0.00880759
534.6	-0.03689314		1064.59	-0.01649846		1594.59	-0.00789713		2124.58	-0.01474762		2654.58	-0.01957017		3184.57	-0.0059742		3714.57	-0.01315908		4244.57	-0.01002106
534.8	-0.03688297		1064.79	-0.01784552		1594.79	-0.0081819		2124.78	-0.01434229		2654.78	-0.0195293		3184.77	-0.00590548		3714.77	-0.01297097		4244.77	-0.00982055
535	-0.03571224		1064.99	-0.017759		1594.99	-0.00781704		2124.98	-0.0144519		2654.98	-0.01913635		3184.97	-0.005935		3714.97	-0.01365881		4244.97	-0.00971452
535.2	-0.0353268		1065.19	-0.0175991		1595.19	-0.00816292		2125.18	-0.01424828		2655.18	-0.01907613		3185.17	-0.00663225		3715.17	-0.01391088		4245.17	-0.01009548
535.4	-0.03478601		1065.39	-0.01778467		1595.39	-0.00844301		2125.38	-0.01364561		2655.38	-0.01987213		3185.37	-0.00717066		3715.37	-0.01407195		4245.37	-0.0105988
535.6	-0.03395283		1065.59	-0.01802161		1595.59	-0.00936145		2125.58	-0.01303773		2655.58	-0.02025171		3185.57	-0.00753812		3715.57	-0.01362126		4245.57	-0.01040293
535.8	-0.03504572		1065.79	-0.01845421		1595.79	-0.00909334		2125.78	-0.0128821		2655.78	-0.02016484		3185.77	-0.00838017		3715.77	-0.01382115		4245.77	-0.01030066
536	-0.03521913		1065.99	-0.01777246		1595.99	-0.00938086		2125.98	-0.01223373		2655.98	-0.02096846		3185.97	-0.00889225		3715.97	-0.01434928		4245.97	-0.01082376
536.2	-0.03449813		1066.19	-0.0179235		1596.19	-0.00935417		2126.18	-0.01263902		2656.18	-0.02161802		3186.17	-0.0094152		3716.17	-0.01441153		4246.17	-0.01041068
536.4	-0.03463833		1066.39	-0.01786759		1596.39	-0.00915258		2126.38	-0.01181284		2656.38	-0.02212401		3186.37	-0.00962625		3716.37	-0.01431977		4246.37	-0.00984017
536.6	-0.03422297		1066.59	-0.01855131		1596.59	-0.00886668		2126.58	-0.01137705		2656.58	-0.02237763		3186.57	-0.00890258		3716.57	-0.01448204		4246.57	-0.00901157
536.8	-0.03382917		1066.79	-0.01899308		1596.79	-0.00893532		2126.78	-0.0123135		2656.78	-0.02302582		3186.77	-0.00880184		3716.77	-0.014225		4246.77	-0.00938117
537	-0.03366163		1066.99	-0.01912889		1596.99	-0.0086651		2126.98	-0.01249617		2656.98	-0.02336748		3186.97	-0.00888776		3716.97	-0.01401126		4246.97	-0.00923272
537.2	-0.03396033		1067.19	-0.01989298		1597.19	-0.009199		2127.18	-0.01333307		2657.18	-0.02317136		3187.17	-0.0086419		3717.17	-0.01397159		4247.17	-0.00960536
537.4	-0.03391337		1067.39	-0.0201826		1597.39	-0.00978099		2127.38	-0.01265784		2657.38	-0.02356766		3187.37	-0.00823623		3717.37	-0.01416279		4247.37	-0.01005751
537.6	-0.03375208		1067.59	-0.01998588		1597.59	-0.00995417		2127.58	-0.01310712		2657.58	-0.02332662		3187.57	-0.00868768		3717.57	-0.01481327		4247.57	-0.00955346
537.8	-0.03428673		1067.79	-0.01976039		1597.79	-0.0106714		2127.78	-0.01365082		2657.78	-0.02374178		3187.77	-0.00867568		3717.77	-0.01468902		4247.77	-0.0097852
538	-0.03489745		1067.99	-0.01991729		1597.99	-0.0112021		2127.98	-0.01346345		2657.98	-0.02365998		3187.97	-0.00884311		3717.97	-0.01513487		4247.97	-0.009472
538.2	-0.03448892		1068.19	-0.02041382		1598.19	-0.0111181		2128.18	-0.01393937		2658.18	-0.02284405		3188.17	-0.00867441		3718.17	-0.01464756		4248.17	-0.00884823
538.4	-0.03380464		1068.39	-0.02031253		1598.39	-0.01036663		2128.38	-0.01382101		2658.38	-0.02285497		3188.37	-0.00875591		3718.37	-0.01409878		4248.37	-0.01026454
538.6	-0.03395812		1068.59	-0.01990946		1598.59	-0.01101634		2128.58	-0.01416329		2658.58	-0.02196195		3188.57	-0.00823415		3718.57	-0.01509406		4248.57	-0.01088219
538.8	-0.03342669		1068.79	-0.01985541		1598.79	-0.01090541		2128.78	-0.01357348		2658.78	-0.02182138		3188.77	-0.00815347		3718.77	-0.01496502		4248.77	-0.01066607
539	-0.03321152		1068.99	-0.01848608		1598.99	-0.01049432		2128.98	-0.01452671		2658.98	-0.02083244		3188.97	-0.00776117		3718.97	-0.01572274		4248.97	-0.01150324
539.2	-0.03372912		1069.19	-0.01790416		1599.19	-0.00964846		2129.18	-0.01435467		2659.18	-0.02072696		3189.17	-0.00804255		3719.17	-0.01580511		4249.17	-0.01202653
539.4	-0.03432372		1069.39	-0.01738045		1599.39	-0.00902814		2129.38	-0.01409052		2659.38	-0.02106926		3189.37	-0.00759629		3719.37	-0.01622448		4249.37	-0.01165912
539.6	-0.03461971		1069.59	-0.01709091		1599.59	-0.00825823		2129.58	-0.01426959		2659.58	-0.02112119		3189.57	-0.00815969		3719.57	-0.01579966		4249.57	-0.01120009
539.8	-0.03501753		1069.79	-0.01683666		1599.79	-0.00759988		2129.78	-0.01432187		2659.78	-0.02080694		3189.77	-0.00811924		3719.77	-0.01526742		4249.77	-0.01126885
540	-0.03460906		1069.99	-0.01618714		1599.99	-0.00739456		2129.98	-0.01454783		2659.98	-0.02077254		3189.97	-0.00794033		3719.97	-0.01489445		4249.97	-0.0109369
540.2	-0.0338423		1070.19	-0.01616703		1600.19	-0.00693572		2130.18	-0.01469594		2660.18	-0.02057013		3190.17	-0.00818271		3720.17	-0.01449214		4250.17	-0.01038345
540.4	-0.03443325		1070.39	-0.01572014		1600.39	-0.0071489		2130.38	-0.01389746		2660.38	-0.02060582		3190.37	-0.00842256		3720.37	-0.01362738		4250.37	-0.01064409
540.6	-0.03464995		1070.59	-0.01611112		1600.59	-0.00725395		2130.58	-0.0140872		2660.58	-0.0208139		3190.57	-0.00818754		3720.57	-0.01336683		4250.57	-0.01052133
540.8	-0.03391907		1070.79	-0.01630724		1600.79	-0.00678157		2130.78	-0.01459931		2660.78	-0.02070349		3190.77	-0.00870718		3720.77	-0.01283636		4250.77	-0.01157841
541	-0.03461313		1070.99	-0.0166269		1600.99	-0.00667037		2130.98	-0.01511458		2660.98	-0.02035546		3190.97	-0.0087256		3720.97	-0.01252623		4250.97	-0.01122465
541.2	-0.03486328		1071.19	-0.01661443		1601.19	-0.00776314		2131.18	-0.01567554		2661.18	-0.01982628		3191.17	-0.00885354		3721.17	-0.01254432		4251.17	-0.01116433
541.4	-0.03485423		1071.39	-0.01620093		1601.39	-0.0086225		2131.38	-0.0157031		2661.38	-0.02007681		3191.37	-0.00886908		3721.37	-0.01254487		4251.37	-0.01129129
541.6	-0.03484249		1071.59	-0.01538169		1601.59	-0.00887214		2131.58	-0.01549908		2661.58	-0.01953017		3191.57	-0.00930632		3721.57	-0.01216199		4251.57	-0.01093105
541.8	-0.03482297		1071.79	-0.01492949		1601.79	-0.00969145		2131.78	-0.01472863		2661.78	-0.02027983		3191.77	-0.00968046		3721.77	-0.01172349		4251.77	-0.01135549
542	-0.03539221		1071.99	-0.01535907		1601.99	-0.00977302		2131.98	-0.01440969		2661.98	-0.02008461		3191.97	-0.0098367		3721.97	-0.01285167		4251.97	-0.01162019
542.2	-0.03529648		1072.19	-0.01508581		1602.19	-0.00959217		2132.18	-0.01464409		2662.18	-0.02007705		3192.17	-0.00936903		3722.17	-0.01319738		4252.17	-0.01121042
542.4	-0.03544005		1072.39	-0.01481011		1602.39	-0.00944015		2132.38	-0.01464468		2662.38	-0.02052811		3192.37	-0.00923337		3722.37	-0.01491095		4252.37	-0.01155947
542.6	-0.03625349		1072.59	-0.01456344		1602.59	-0.00949654		2132.58	-0.01524483		2662.58	-0.02004937		3192.57	-0.00956941		3722.57	-0.01629962		4252.57	-0.01027227
542.8	-0.03576723		1072.79	-0.01407591		1602.79	-0.00927105		2132.78	-0.01478997		2662.78	-0.02004315		3192.77	-0.00942731		3722.77	-0.01694142		4252.77	-0.00932951
543	-0.036475		1072.99	-0.01413724		1602.99	-0.00840492		2132.98	-0.01509781		2662.98	-0.01940401		3192.97	-0.00898857		3722.97	-0.01703084		4252.97	-0.00921594
543.2	-0.03710697		1073.19	-0.01468478		1603.19	-0.00744834		2133.18	-0.01544582		2663.18	-0.01957273		3193.17	-0.00957223		3723.17	-0.0175955		4253.17	-0.00830398
543.4	-0.03733211		1073.39	-0.01539408		1603.39	-0.0071311		2133.38	-0.01491275		2663.38	-0.01993758		3193.37	-0.0092103		3723.37	-0.01718015		4253.37	-0.00817794
543.6	-0.03712789		1073.59	-0.01580644		1603.59	-0.00714348		2133.58	-0.01385917		2663.58	-0.01990402		3193.57	-0.00877535		3723.57	-0.01670709		4253.57	-0.00723192
543.8	-0.03691117		1073.79	-0.01690152		1603.79	-0.00681002		2133.78	-0.01356958		2663.78	-0.02002753		3193.77	-0.00815329		3723.77	-0.01668561		4253.77	-0.00728576
544	-0.0359619		1073.99	-0.0174352		1603.99	-0.00659817		2133.98	-0.01359991		2663.98	-0.02102201		3193.97	-0.00843899		3723.97	-0.0164809		4253.97	-0.0066645
544.2	-0.03479951		1074.19	-0.01761171		1604.19	-0.00616865		2134.18	-0.01362973		2664.18	-0.02176401		3194.17	-0.00911613		3724.17	-0.01612435		4254.17	-0.0067432
544.4	-0.03452476		1074.39	-0.01824214		1604.39	-0.00577063		2134.38	-0.01342683		2664.38	-0.02147491		3194.37	-0.00887986		3724.37	-0.01451644		4254.37	-0.00710003
544.6	-0.03444324		1074.59	-0.0186791		1604.59	-0.00574914		2134.58	-0.01302317		2664.58	-0.02166418		3194.57	-0.00941098		3724.57	-0.01451821		4254.57	-0.00763621
544.8	-0.03394208		1074.79	-0.0187512		1604.79	-0.00549839		2134.78	-0.01247443		2664.78	-0.02159254		3194.77	-0.00928562		3724.77	-0.0141079		4254.77	-0.00832418
545	-0.03466608		1074.99	-0.01846268		1604.99	-0.0060138		2134.98	-0.01182142		2664.98	-0.02182379		3194.97	-0.00949579		3724.97	-0.01309633		4254.97	-0.00805545
545.2	-0.03500773		1075.19	-0.01781292		1605.19	-0.00701897		2135.18	-0.01090269		2665.18	-0.02220944		3195.17	-0.00945541		3725.17	-0.01248515		4255.17	-0.00875196
545.4	-0.03594121		1075.39	-0.0181305		1605.39	-0.00763418		2135.38	-0.01023178		2665.38	-0.02247858		3195.37	-0.01004707		3725.37	-0.01194697		4255.37	-0.00977703
545.6	-0.036664		1075.59	-0.01826886		1605.59	-0.00817537		2135.58	-0.00967663		2665.58	-0.0223056		3195.57	-0.01002879		3725.57	-0.01248708		4255.57	-0.01013046
545.8	-0.0366634		1075.79	-0.01798694		1605.79	-0.008251		2135.78	-0.0090834		2665.78	-0.02330465		3195.77	-0.00999204		3725.77	-0.01298282		4255.77	-0.01152839
546	-0.03762657		1075.99	-0.01819821		1605.99	-0.00816157		2135.98	-0.00908732		2665.98	-0.02312753		3195.97	-0.00931982		3725.97	-0.01400632		4255.97	-0.0121197
546.2	-0.03836724		1076.19	-0.01824935		1606.19	-0.00757423		2136.18	-0.00934042		2666.18	-0.02325553		3196.17	-0.00907538		3726.17	-0.01437851		4256.17	-0.01241599
546.4	-0.03814584		1076.39	-0.01759252		1606.39	-0.00774894		2136.38	-0.00926679		2666.38	-0.02331306		3196.37	-0.00859685		3726.37	-0.01501223		4256.37	-0.01308946
546.6	-0.03850119		1076.59	-0.01700864		1606.59	-0.00810187		2136.58	-0.01013443		2666.58	-0.0228416		3196.57	-0.00894353		3726.57	-0.01536244		4256.57	-0.01316837
546.8	-0.03870469		1076.79	-0.0169883		1606.79	-0.0088153		2136.78	-0.01096093		2666.78	-0.0226371		3196.77	-0.00887641		3726.77	-0.01634765		4256.77	-0.01292962
547	-0.03903398		1076.99	-0.01707979		1606.99	-0.00977446		2136.98	-0.01270305		2666.98	-0.02215316		3196.97	-0.00855626		3726.97	-0.01642912		4256.97	-0.01339469
547.2	-0.03905457		1077.19	-0.01720441		1607.19	-0.01007697		2137.18	-0.01368082		2667.18	-0.02223158		3197.17	-0.00925038		3727.17	-0.01707443		4257.17	-0.01244535
547.4	-0.03840216		1077.39	-0.01715911		1607.39	-0.01062779		2137.38	-0.01403291		2667.38	-0.02124403		3197.37	-0.00838568		3727.37	-0.01782247		4257.37	-0.01255064
547.6	-0.03887381		1077.59	-0.01686116		1607.59	-0.01081602		2137.58	-0.01543144		2667.58	-0.02095652		3197.57	-0.00850136		3727.57	-0.01822028		4257.57	-0.01171332
547.8	-0.03806733		1077.79	-0.01729462		1607.79	-0.01092165		2137.78	-0.01699798		2667.78	-0.02141014		3197.77	-0.00958448		3727.77	-0.01819317		4257.77	-0.01197512
548	-0.03677935		1077.99	-0.01775873		1607.99	-0.01085723		2137.98	-0.01821849		2667.98	-0.02159984		3197.97	-0.01018345		3727.97	-0.01847961		4257.97	-0.01131161
548.2	-0.0359317		1078.19	-0.01858643		1608.19	-0.01076179		2138.18	-0.01797953		2668.18	-0.02112338		3198.17	-0.01079822		3728.17	-0.01921918		4258.17	-0.01098305
548.4	-0.03519997		1078.39	-0.01895516		1608.39	-0.01112213		2138.38	-0.01787907		2668.38	-0.02050123		3198.37	-0.01076352		3728.37	-0.01836083		4258.37	-0.01041498
548.6	-0.03489444		1078.59	-0.01981578		1608.59	-0.01061755		2138.58	-0.01780644		2668.58	-0.0201202		3198.57	-0.0117678		3728.57	-0.01806887		4258.57	-0.00951364
548.8	-0.03424784		1078.79	-0.0208065		1608.79	-0.00939445		2138.78	-0.01710071		2668.78	-0.0197908		3198.77	-0.0109471		3728.77	-0.01740545		4258.77	-0.0090552
549	-0.03433558		1078.99	-0.02166105		1608.99	-0.00940618		2138.98	-0.01615062		2668.98	-0.01993678		3198.97	-0.01101378		3728.97	-0.01616292		4258.97	-0.00826514
549.2	-0.03460031		1079.19	-0.02160751		1609.19	-0.00916818		2139.18	-0.01554799		2669.18	-0.01963791		3199.17	-0.01096047		3729.17	-0.0168371		4259.17	-0.00847803
549.4	-0.0346037		1079.39	-0.02192013		1609.39	-0.00898873		2139.38	-0.01550378		2669.38	-0.0200045		3199.37	-0.01051648		3729.37	-0.01698746		4259.37	-0.00874454
549.6	-0.03470623		1079.59	-0.02202741		1609.59	-0.00865276		2139.58	-0.01536424		2669.58	-0.02054138		3199.57	-0.00958204		3729.57	-0.01756697		4259.57	-0.00869141
549.8	-0.03435092		1079.79	-0.02170433		1609.79	-0.00761661		2139.78	-0.01474277		2669.78	-0.02138884		3199.77	-0.00880748		3729.77	-0.01697726		4259.77	-0.00927497
550	-0.03537326		1079.99	-0.02190923		1609.99	-0.00661		2139.98	-0.01460283		2669.98	-0.02096422		3199.97	-0.00847556		3729.97	-0.01704249		4259.97	-0.01013336
550.2	-0.03536237		1080.19	-0.02042098		1610.19	-0.00639854		2140.18	-0.01470816		2670.18	-0.02164505		3200.17	-0.00824458		3730.17	-0.01712448		4260.17	-0.01105821
550.4	-0.03539137		1080.39	-0.01916933		1610.39	-0.00668067		2140.38	-0.01483208		2670.38	-0.02191958		3200.37	-0.00841486		3730.37	-0.0163768		4260.37	-0.01110045
550.6	-0.03629626		1080.59	-0.01815151		1610.59	-0.00680623		2140.58	-0.01515334		2670.58	-0.02241563		3200.57	-0.00940807		3730.57	-0.01628615		4260.57	-0.01113713
550.8	-0.03741083		1080.79	-0.01754462		1610.79	-0.00806625		2140.78	-0.01588867		2670.78	-0.02286334		3200.77	-0.00890501		3730.77	-0.01676894		4260.77	-0.01116692
551	-0.03793054		1080.99	-0.01763255		1610.99	-0.00934487		2140.98	-0.0162036		2670.98	-0.02305889		3200.97	-0.00847566		3730.97	-0.01617942		4260.97	-0.01153541
551.2	-0.03850696		1081.19	-0.01820418		1611.19	-0.00935958		2141.18	-0.01493438		2671.18	-0.02293491		3201.17	-0.00966156		3731.17	-0.01554191		4261.17	-0.01122145
551.4	-0.03912696		1081.39	-0.01787328		1611.39	-0.01016478		2141.38	-0.01496888		2671.38	-0.022362		3201.37	-0.00977409		3731.37	-0.01532881		4261.37	-0.01122755
551.6	-0.03963757		1081.59	-0.01723728		1611.59	-0.01034989		2141.58	-0.01470247		2671.58	-0.02349567		3201.57	-0.01027286		3731.57	-0.01407022		4261.57	-0.01053643
551.8	-0.03922528		1081.79	-0.01722652		1611.79	-0.01113075		2141.78	-0.01404824		2671.78	-0.02376665		3201.77	-0.01040453		3731.77	-0.0137892		4261.77	-0.01086056
552	-0.03889344		1081.99	-0.01722234		1611.99	-0.01143728		2141.98	-0.01329086		2671.98	-0.02406862		3201.97	-0.01098868		3731.97	-0.01395662		4261.97	-0.01041604
552.2	-0.03837479		1082.19	-0.01726869		1612.19	-0.01196411		2142.18	-0.01299974		2672.18	-0.0235623		3202.17	-0.01113038		3732.17	-0.0135413		4262.17	-0.00991081
552.4	-0.03793619		1082.39	-0.01742338		1612.39	-0.01220883		2142.38	-0.01388283		2672.38	-0.02304239		3202.37	-0.01057492		3732.37	-0.01266261		4262.37	-0.00909588
552.6	-0.03763214		1082.59	-0.01866191		1612.59	-0.01250406		2142.58	-0.01421791		2672.58	-0.02284244		3202.57	-0.01070198		3732.57	-0.01223125		4262.57	-0.00828712
552.8	-0.03775736		1082.79	-0.01861387		1612.79	-0.01289014		2142.78	-0.01388689		2672.78	-0.0219352		3202.77	-0.01056407		3732.77	-0.01323348		4262.77	-0.00835614
553	-0.03787729		1082.99	-0.01894847		1612.99	-0.0126631		2142.98	-0.01300153		2672.98	-0.02244104		3202.97	-0.01046332		3732.97	-0.01349099		4262.97	-0.00808534
553.2	-0.0375441		1083.19	-0.0190803		1613.19	-0.01282847		2143.18	-0.01341355		2673.18	-0.02309591		3203.17	-0.00985526		3733.17	-0.01416198		4263.17	-0.00843202
553.4	-0.03739481		1083.39	-0.01892984		1613.39	-0.01254515		2143.38	-0.01402464		2673.38	-0.02389988		3203.37	-0.00889614		3733.37	-0.01422161		4263.37	-0.00811215
553.6	-0.0371883		1083.59	-0.0195819		1613.59	-0.01169415		2143.58	-0.0144437		2673.58	-0.02377549		3203.57	-0.00891363		3733.57	-0.01491171		4263.57	-0.00813896
553.8	-0.03649391		1083.79	-0.01883958		1613.79	-0.01042935		2143.78	-0.0146103		2673.78	-0.02414318		3203.77	-0.00923346		3733.77	-0.01508305		4263.77	-0.00800799
554	-0.03734643		1083.99	-0.01875643		1613.99	-0.0094932		2143.98	-0.01395911		2673.98	-0.02326876		3203.97	-0.00969181		3733.97	-0.01627004		4263.97	-0.00899398
554.2	-0.03662177		1084.19	-0.01779294		1614.19	-0.00883575		2144.18	-0.01427634		2674.18	-0.02354898		3204.17	-0.01016284		3734.17	-0.0171549		4264.17	-0.00915178
554.4	-0.03738671		1084.39	-0.01820039		1614.39	-0.0086063		2144.38	-0.01391109		2674.38	-0.02313246		3204.37	-0.01057386		3734.37	-0.01705798		4264.37	-0.00971146
554.6	-0.03779477		1084.59	-0.01844272		1614.59	-0.00901532		2144.58	-0.01384303		2674.58	-0.02362851		3204.57	-0.01064902		3734.57	-0.01814766		4264.57	-0.00981116
554.8	-0.03758028		1084.79	-0.01854023		1614.79	-0.01016549		2144.78	-0.0141492		2674.78	-0.02381906		3204.77	-0.01078977		3734.77	-0.01856397		4264.77	-0.01043145
555	-0.03721564		1084.99	-0.0194174		1614.99	-0.0105142		2144.98	-0.01436682		2674.98	-0.02356949		3204.97	-0.01124546		3734.97	-0.01837121		4264.97	-0.01054303
555.2	-0.03718435		1085.19	-0.01931853		1615.19	-0.01003773		2145.18	-0.01267096		2675.18	-0.02280862		3205.17	-0.01219814		3735.17	-0.01779358		4265.17	-0.0101424
555.4	-0.0371142		1085.39	-0.01816253		1615.39	-0.00992609		2145.38	-0.01280235		2675.38	-0.02248041		3205.37	-0.01143383		3735.37	-0.01791985		4265.37	-0.00996023
555.6	-0.03690854		1085.59	-0.01732798		1615.59	-0.01067847		2145.58	-0.0126119		2675.58	-0.02292595		3205.57	-0.01106732		3735.57	-0.01810941		4265.57	-0.01069646
555.8	-0.03748766		1085.79	-0.01721501		1615.79	-0.01139063		2145.78	-0.01315218		2675.78	-0.02272254		3205.77	-0.01139372		3735.77	-0.01787556		4265.77	-0.01110255
556	-0.03697578		1085.99	-0.01674047		1615.99	-0.01212251		2145.98	-0.01416875		2675.98	-0.02245009		3205.97	-0.01143275		3735.97	-0.01710284		4265.97	-0.01088068
556.2	-0.03730358		1086.19	-0.0174692		1616.19	-0.0124049		2146.18	-0.01469092		2676.18	-0.02215073		3206.17	-0.01111117		3736.17	-0.01692062		4266.17	-0.01098629
556.4	-0.0378215		1086.39	-0.01816071		1616.39	-0.01285582		2146.38	-0.0154355		2676.38	-0.02215475		3206.37	-0.01059477		3736.37	-0.01674588		4266.37	-0.01101983
556.6	-0.03848314		1086.59	-0.01868812		1616.59	-0.01313263		2146.58	-0.01569425		2676.58	-0.02181795		3206.57	-0.01058084		3736.57	-0.01699135		4266.57	-0.01118837
556.8	-0.03857194		1086.79	-0.01905349		1616.79	-0.01259808		2146.78	-0.01503854		2676.78	-0.0219059		3206.77	-0.01088377		3736.77	-0.01666568		4266.77	-0.01194768
557	-0.0383103		1086.99	-0.01911633		1616.99	-0.01168898		2146.98	-0.01477962		2676.98	-0.0236235		3206.97	-0.01010581		3736.97	-0.01590981		4266.97	-0.01279545
557.2	-0.03780237		1087.19	-0.01924436		1617.19	-0.01207987		2147.18	-0.01534167		2677.18	-0.02427568		3207.17	-0.00951342		3737.17	-0.01502503		4267.17	-0.01286761
557.4	-0.03808745		1087.39	-0.01907797		1617.39	-0.01157808		2147.38	-0.01511451		2677.38	-0.02447379		3207.37	-0.0087568		3737.37	-0.015482		4267.37	-0.01255523
557.6	-0.0388246		1087.59	-0.01943444		1617.59	-0.0107052		2147.58	-0.01488504		2677.58	-0.02489555		3207.57	-0.00910323		3737.57	-0.0157242		4267.57	-0.01321158
557.8	-0.03931747		1087.79	-0.01924975		1617.79	-0.0104118		2147.78	-0.0139216		2677.78	-0.0256449		3207.77	-0.00858256		3737.77	-0.01616877		4267.77	-0.0136888
558	-0.03978742		1087.99	-0.01994607		1617.99	-0.01026235		2147.98	-0.01316606		2677.98	-0.02511758		3207.97	-0.00827966		3737.97	-0.01684276		4267.97	-0.01471105
558.2	-0.03932417		1088.19	-0.02005899		1618.19	-0.01001368		2148.18	-0.01310273		2678.18	-0.02545752		3208.17	-0.0083493		3738.17	-0.01733308		4268.17	-0.0151761
558.4	-0.0396566		1088.39	-0.02059447		1618.39	-0.01042472		2148.38	-0.01255574		2678.38	-0.02539241		3208.37	-0.00819813		3738.37	-0.01737158		4268.37	-0.01535313
558.6	-0.03915993		1088.59	-0.02081489		1618.59	-0.01029009		2148.58	-0.01255105		2678.58	-0.02539541		3208.57	-0.00860623		3738.57	-0.01792358		4268.57	-0.01513887
558.8	-0.03886219		1088.79	-0.02067194		1618.79	-0.01011056		2148.78	-0.01223838		2678.78	-0.02506319		3208.77	-0.00902309		3738.77	-0.01771993		4268.77	-0.01537365
559	-0.03893028		1088.99	-0.02106957		1618.99	-0.0095501		2148.98	-0.01182455		2678.98	-0.02428724		3208.97	-0.00882456		3738.97	-0.0178786		4268.97	-0.01473485
559.2	-0.0387312		1089.19	-0.02116568		1619.19	-0.00904415		2149.18	-0.01058014		2679.18	-0.02350395		3209.17	-0.00913805		3739.17	-0.01771569		4269.17	-0.01417106
559.4	-0.03867082		1089.39	-0.02093736		1619.39	-0.0089859		2149.38	-0.01074326		2679.38	-0.02305706		3209.37	-0.00931		3739.37	-0.01771699		4269.37	-0.01399956
559.6	-0.03844392		1089.59	-0.02138963		1619.59	-0.00923662		2149.58	-0.01097061		2679.58	-0.02292811		3209.57	-0.01043867		3739.57	-0.01744367		4269.57	-0.01379546
559.8	-0.038029		1089.79	-0.02176609		1619.79	-0.0085899		2149.78	-0.01090244		2679.78	-0.02230135		3209.77	-0.01112914		3739.77	-0.01648324		4269.77	-0.01303101
