# Supplementary material for: Functional development of a V3/glycan-specific broadly neutralizing antibody isolated from a case of HIV superinfection
Source: eLife journal article supplement (doi:10.7554/elife.68110), 2021-07-15
Supplement: fig4-data2 [file G3.xls]

Vers 3.43 Data Simulation
Conc1	7.81E-09	7.81E-09	7.81E-09	7.81E-09	7.81E-09	7.81E-09	7.81E-09	7.81E-09
Start1	200	729.99	1259.99	1789.99	2319.98	2849.98	3379.97	3909.97
Stop1	559.8	1089.79	1619.79	2149.78	2679.78	3209.77	3739.77	4269.77
Time1	Data1	Sim1	Time2	Data2	Sim2	Time3	Data3	Sim3	Time4	Data4	Sim4	Time5	Data5	Sim5	Time6	Data6	Sim6	Time7	Data7	Sim7	Time8	Data8	Sim8
200	-0.00769196		729.99	0.00783027		1259.99	0.00746131		1789.99	0.00783591		2319.98	0.00115135		2849.98	0.00342772		3379.97	0.00168819		3909.97	-0.00140686
200.2	-0.00731994		730.19	0.0081243		1260.19	0.00639931		1790.19	0.00727319		2320.18	0.00157343		2850.18	0.00293859		3380.17	0.0023667		3910.17	-0.00264073
200.4	-0.00723176		730.39	0.00927706		1260.39	0.00587571		1790.39	0.00646027		2320.38	0.00223311		2850.38	0.00250598		3380.37	0.00277211		3910.37	-0.00420542
200.6	-0.00674691		730.59	0.00963298		1260.59	0.00518056		1790.59	0.0048897		2320.58	0.00273175		2850.58	0.00163767		3380.57	0.00328252		3910.57	-0.00533456
200.8	-0.00607538		730.79	0.01077604		1260.79	0.00535721		1790.79	0.00421653		2320.78	0.00343775		2850.78	0.00089654		3380.77	0.00404908		3910.77	-0.00666269
201	-0.00559332		730.99	0.01137357		1260.99	0.00550447		1790.99	0.00328262		2320.98	0.00395807		2850.98	0.00054881		3380.97	0.00396645		3910.97	-0.00703674
201.2	-0.00530369		731.19	0.0113911		1261.19	0.00558143		1791.19	0.0028317		2321.18	0.00435611		2851.18	0.00072738		3381.17	0.00420018		3911.17	-0.00836572
201.4	-0.00495393		731.39	0.01158662		1261.39	0.00535128		1791.39	0.00297932		2321.38	0.00386198		2851.38	0.00013356		3381.37	0.00405809		3911.37	-0.0087141
201.6	-0.00557225		731.59	0.01134318		1261.59	0.00612819		1791.59	0.00293433		2321.58	0.00334902		2851.58	0.00013658		3381.57	0.00432499		3911.57	-0.00919213
201.8	-0.005103		731.79	0.0115525		1261.79	0.00542461		1791.79	0.00221986		2321.78	0.00249558		2851.78	0.00021582		3381.77	0.00359597		3911.77	-0.00936185
202	-0.00541156		731.99	0.0111791		1261.99	0.00567181		1791.99	0.00238384		2321.98	0.00159903		2851.98	0.00063684		3381.97	0.00309985		3911.97	-0.00889798
202.2	-0.00551445		732.19	0.01046658		1262.19	0.00629683		1792.19	0.00258807		2322.18	0.00159697		2852.18	0.00153192		3382.17	0.00215657		3912.17	-0.00802535
202.4	-0.00488811		732.39	0.01014639		1262.39	0.00574244		1792.39	0.00236879		2322.38	0.00062368		2852.38	0.00242302		3382.37	0.00145959		3912.37	-0.00822886
202.6	-0.00417811		732.59	0.00955769		1262.59	0.00436101		1792.59	0.001879		2322.58	0.0010245		2852.58	0.00242832		3382.57	0.00075028		3912.57	-0.00880203
202.8	-0.0043545		732.79	0.00884931		1262.79	0.00369571		1792.79	0.00127442		2322.78	0.00091696		2852.78	0.00228839		3382.77	-0.00033203		3912.77	-0.00849289
203	-0.00523123		732.99	0.00859499		1262.99	0.00376773		1792.99	0.00125598		2322.98	0.00190218		2852.98	0.00295257		3382.97	-0.00063898		3912.97	-0.00780425
203.2	-0.00531448		733.19	0.00800923		1263.19	0.00393013		1793.19	0.00138077		2323.18	0.00152267		2853.18	0.00284022		3383.17	0.00010681		3913.17	-0.00780773
203.4	-0.00601733		733.39	0.00818747		1263.39	0.00453179		1793.39	0.00179118		2323.38	0.00193334		2853.38	0.00217326		3383.37	0.00003108		3913.37	-0.00836524
203.6	-0.00565869		733.59	0.00865343		1263.59	0.00440837		1793.59	0.00142429		2323.58	0.0012442		2853.58	0.00094074		3383.57	-0.00059259		3913.57	-0.00748456
203.8	-0.00604841		733.79	0.00906139		1263.79	0.00414922		1793.79	0.00239415		2323.78	0.00110032		2853.78	0.00026667		3383.77	0.00042264		3913.77	-0.00753322
204	-0.00592521		733.99	0.0097538		1263.99	0.00447783		1793.99	0.00263567		2323.98	0.00204932		2853.98	-0.00036683		3383.97	0.00000241		3913.97	-0.00768632
204.2	-0.00658707		734.19	0.01070638		1264.19	0.00430875		1794.19	0.00227102		2324.18	0.00218157		2854.18	-0.00033377		3384.17	0.00067075		3914.17	-0.00859567
204.4	-0.00682637		734.39	0.01137205		1264.39	0.00477448		1794.39	0.00136907		2324.38	0.00311807		2854.38	-0.00011906		3384.37	0.00127626		3914.37	-0.00884393
204.6	-0.00679698		734.59	0.01139219		1264.59	0.00530822		1794.59	0.00067192		2324.58	0.00386699		2854.58	-0.00057546		3384.57	0.00130896		3914.57	-0.00951687
204.8	-0.00694632		734.79	0.01185343		1264.79	0.0066112		1794.79	0.0006092		2324.78	0.00453641		2854.78	-0.00031031		3384.77	0.00124231		3914.77	-0.01024003
205	-0.00681269		734.99	0.01079026		1264.99	0.00653778		1794.99	0.0005538		2324.98	0.00416305		2854.98	0.00001038		3384.97	0.00168376		3914.97	-0.00984902
205.2	-0.00691788		735.19	0.01079945		1265.19	0.00607865		1795.19	0.00037303		2325.18	0.00400999		2855.18	-0.00021398		3385.17	0.00222461		3915.17	-0.01016184
205.4	-0.0070848		735.39	0.01028014		1265.39	0.00621365		1795.39	0.00047339		2325.38	0.00298696		2855.38	-0.00018808		3385.37	0.00216411		3915.37	-0.00983198
205.6	-0.00717761		735.59	0.00991601		1265.59	0.00662404		1795.59	0.00004185		2325.58	0.00322997		2855.58	-0.00065149		3385.57	0.00162167		3915.57	-0.00981837
205.8	-0.00595389		735.79	0.00961049		1265.79	0.00562784		1795.79	-0.00140764		2325.78	0.00263219		2855.78	-0.00080223		3385.77	0.0006431		3915.77	-0.00961286
206	-0.00625348		735.99	0.00837492		1265.99	0.00623657		1795.99	-0.00120116		2325.98	0.00242726		2855.98	-0.00036094		3385.97	-0.00006336		3915.97	-0.00873444
206.2	-0.00513727		736.19	0.0077484		1266.19	0.00590336		1796.19	-0.00148069		2326.18	0.00249458		2856.18	0.00055332		3386.17	-0.0006086		3916.17	-0.00870349
206.4	-0.00416874		736.39	0.00706772		1266.39	0.0053886		1796.39	-0.00087312		2326.38	0.00158242		2856.38	0.000624		3386.37	-0.00072429		3916.37	-0.00857976
206.6	-0.00408827		736.59	0.00578714		1266.59	0.00523399		1796.59	-0.00084345		2326.58	0.00135138		2856.58	0.00070113		3386.57	-0.00123013		3916.57	-0.0076079
206.8	-0.00439496		736.79	0.00504743		1266.79	0.00553039		1796.79	0.00011847		2326.78	0.00043289		2856.78	0.00073358		3386.77	-0.0018972		3916.77	-0.00625629
207	-0.0043999		736.99	0.0048277		1266.99	0.00552569		1796.99	0.00020814		2326.98	0.00063799		2856.98	0.00066097		3386.97	-0.00093885		3916.97	-0.00545016
207.2	-0.00424284		737.19	0.00544673		1267.19	0.00644006		1797.19	0.00012556		2327.18	-0.00059261		2857.18	-0.00015016		3387.17	-0.00095851		3917.17	-0.00489218
207.4	-0.00454953		737.39	0.00688392		1267.39	0.00655004		1797.39	0.00057854		2327.38	-0.00110549		2857.38	-0.00067505		3387.37	-0.00051995		3917.37	-0.00517766
207.6	-0.00404653		737.59	0.00708137		1267.59	0.00659983		1797.59	0.00168558		2327.58	-0.00323877		2857.58	-0.00130521		3387.57	-0.00001844		3917.57	-0.00427402
207.8	-0.00455235		737.79	0.00726963		1267.79	0.006492		1797.79	0.00250159		2327.78	-0.00444133		2857.78	-0.00219399		3387.77	0.00074471		3917.77	-0.00454425
208	-0.00529234		737.99	0.00802448		1267.99	0.00663792		1797.99	0.00288793		2327.98	-0.00428592		2857.98	-0.00214702		3387.97	0.00042584		3917.97	-0.00453833
208.2	-0.00560509		738.19	0.00906179		1268.19	0.00674798		1798.19	0.00276281		2328.18	-0.00437057		2858.18	-0.00142612		3388.17	0.00067859		3918.17	-0.00599
208.4	-0.00570477		738.39	0.00945071		1268.39	0.00634946		1798.39	0.00218458		2328.38	-0.00411832		2858.38	-0.00165199		3388.37	0.00037797		3918.37	-0.00657903
208.6	-0.00539653		738.59	0.00951462		1268.59	0.00637466		1798.59	0.00223436		2328.58	-0.00380647		2858.58	-0.0012033		3388.57	0.0002869		3918.57	-0.00752624
208.8	-0.005011		738.79	0.00977459		1268.79	0.00589381		1798.79	0.00203382		2328.78	-0.00370289		2858.78	-0.00071958		3388.77	0.00055839		3918.77	-0.00799821
209	-0.00510842		738.99	0.00982152		1268.99	0.00503332		1798.99	0.00215532		2328.98	-0.00332766		2858.98	-0.0004636		3388.97	0.00113431		3918.97	-0.00823316
209.2	-0.00543806		739.19	0.01058122		1269.19	0.00428925		1799.19	0.00191417		2329.18	-0.00202453		2859.18	-0.00027919		3389.17	0.00061833		3919.17	-0.00789499
209.4	-0.00609216		739.39	0.01024885		1269.39	0.0043397		1799.39	0.00263795		2329.38	-0.0010062		2859.38	0.00014526		3389.37	-0.00046485		3919.37	-0.00911568
209.6	-0.00594018		739.59	0.00997178		1269.59	0.00416271		1799.59	0.00244382		2329.58	0.00003911		2859.58	-0.00080371		3389.57	-0.00162161		3919.57	-0.00990232
209.8	-0.00614585		739.79	0.00993105		1269.79	0.00363263		1799.79	0.00167572		2329.78	0.00013692		2859.78	-0.00062051		3389.77	-0.00253149		3919.77	-0.01019997
210	-0.00603395		739.99	0.00956597		1269.99	0.00375447		1799.99	0.00273913		2329.98	0.00045146		2859.98	0.00030032		3389.97	-0.00316947		3919.97	-0.00920311
210.2	-0.00545165		740.19	0.01005902		1270.19	0.00264219		1800.19	0.00300384		2330.18	0.00095179		2860.18	0.00065924		3390.17	-0.00368342		3920.17	-0.00833289
210.4	-0.00563994		740.39	0.00969632		1270.39	0.00289642		1800.39	0.00291949		2330.38	0.00191906		2860.38	0.00032399		3390.37	-0.00393593		3920.37	-0.0078199
210.6	-0.00575252		740.59	0.0097429		1270.59	0.00353344		1800.59	0.00297239		2330.58	0.00282357		2860.58	0.00125482		3390.57	-0.00473041		3920.57	-0.00716792
210.8	-0.00629118		740.79	0.00947908		1270.79	0.00344292		1800.79	0.00260775		2330.78	0.00171662		2860.78	0.0008771		3390.77	-0.00439098		3920.77	-0.00594158
211	-0.00617319		740.99	0.01026676		1270.99	0.00345292		1800.99	0.00216812		2330.98	0.00160432		2860.98	0.00107439		3390.97	-0.00425973		3920.97	-0.00559317
211.2	-0.00679944		741.19	0.0104259		1271.19	0.00420307		1801.19	0.00163477		2331.18	0.00045684		2861.18	0.000592		3391.17	-0.00454222		3921.17	-0.00500031
211.4	-0.00648352		741.39	0.01017304		1271.39	0.00479417		1801.39	0.00258351		2331.38	0.00056862		2861.38	0.00101045		3391.37	-0.00380791		3921.37	-0.00541512
211.6	-0.00645783		741.59	0.00902557		1271.59	0.00488781		1801.59	0.00257114		2331.58	-0.00027406		2861.58	0.00022064		3391.57	-0.00403883		3921.57	-0.00533409
211.8	-0.00706589		741.79	0.00943666		1271.79	0.0051829		1801.79	0.00200674		2331.78	0.00014744		2861.78	-0.00030148		3391.77	-0.00401928		3921.77	-0.00571794
212	-0.00684035		741.99	0.00944639		1271.99	0.00531291		1801.99	0.00108648		2331.98	0.00004296		2861.98	-0.00004655		3391.97	-0.00347704		3921.97	-0.00572434
212.2	-0.00647971		742.19	0.00945418		1272.19	0.0058637		1802.19	-0.00051688		2332.18	0.00010629		2862.18	0.00010671		3392.17	-0.00257117		3922.17	-0.00684425
212.4	-0.00602363		742.39	0.00963231		1272.39	0.00536939		1802.39	-0.00154584		2332.38	-0.00072009		2862.38	-0.00009796		3392.37	-0.00202968		3922.37	-0.00663347
212.6	-0.00495266		742.59	0.00857276		1272.59	0.00537008		1802.59	-0.00234368		2332.58	-0.00084702		2862.58	0.00077519		3392.57	-0.00115798		3922.57	-0.00663873
212.8	-0.00530185		742.79	0.0092444		1272.79	0.00551292		1802.79	-0.00269631		2332.78	-0.00060236		2862.78	0.00051392		3392.77	-0.00108763		3922.77	-0.00732008
213	-0.00538641		742.99	0.00924243		1272.99	0.00539247		1802.99	-0.00225113		2332.98	-0.00035904		2862.98	0.00083518		3392.97	-0.0006854		3922.97	-0.00742365
213.2	-0.00466054		743.19	0.00875858		1273.19	0.00522918		1803.19	-0.00220972		2333.18	-0.00070272		2863.18	0.00042592		3393.17	-0.00056519		3923.17	-0.00754707
213.4	-0.00447709		743.39	0.00812272		1273.39	0.00512938		1803.39	-0.00233565		2333.38	-0.00099613		2863.38	0.00057712		3393.37	-0.000996		3923.37	-0.00814682
213.6	-0.00410934		743.59	0.00799298		1273.59	0.00483821		1803.59	-0.00228398		2333.58	-0.00078458		2863.58	-0.00010642		3393.57	-0.00099886		3923.57	-0.008952
213.8	-0.00379334		743.79	0.00818957		1273.79	0.00446464		1803.79	-0.00273964		2333.78	-0.00131705		2863.78	0.00006584		3393.77	-0.00163308		3923.77	-0.00923736
214	-0.00356524		743.99	0.0080939		1273.99	0.00445541		1803.99	-0.00188791		2333.98	-0.00108557		2863.98	0.00021799		3393.97	-0.00179018		3923.97	-0.00796836
214.2	-0.00372641		744.19	0.00806507		1274.19	0.00362778		1804.19	-0.00158997		2334.18	-0.00031055		2864.18	-0.00029397		3394.17	-0.00202791		3924.17	-0.00842787
214.4	-0.00336275		744.39	0.00644982		1274.39	0.00312663		1804.39	-0.00182751		2334.38	-0.00051985		2864.38	-0.00030966		3394.37	-0.00133142		3924.37	-0.0086805
214.6	-0.00313694		744.59	0.00643357		1274.59	0.0035083		1804.59	-0.00082051		2334.58	-0.00057923		2864.58	0.00026089		3394.57	-0.00133226		3924.57	-0.00906194
214.8	-0.00292663		744.79	0.00613008		1274.79	0.002875		1804.79	-0.0010325		2334.78	-0.00150351		2864.78	-0.00063776		3394.77	-0.00055133		3924.77	-0.00851452
215	-0.00270782		744.99	0.00586113		1274.99	0.00360726		1804.99	0.00001529		2334.98	-0.00072509		2864.98	-0.00057355		3394.97	-0.00129329		3924.97	-0.00830729
215.2	-0.00176243		745.19	0.00538075		1275.19	0.00396377		1805.19	0.00051878		2335.18	-0.00055114		2865.18	-0.00078682		3395.17	-0.00076385		3925.17	-0.00819896
215.4	-0.00112809		745.39	0.00536249		1275.39	0.00408816		1805.39	0.00116222		2335.38	0.00020069		2865.38	-0.00144648		3395.37	-0.00022533		3925.37	-0.00969992
215.6	-0.00142289		745.59	0.00548671		1275.59	0.00428583		1805.59	0.00068551		2335.58	0.0006992		2865.58	-0.00257479		3395.57	-0.00022681		3925.57	-0.01022847
215.8	-0.00151951		745.79	0.00599459		1275.79	0.00504105		1805.79	0.0007879		2335.78	0.00182616		2865.78	-0.00292257		3395.77	-0.00000199		3925.77	-0.01066674
216	-0.00121203		745.99	0.00583775		1275.99	0.00573081		1805.99	0.00050418		2335.98	0.00216372		2865.98	-0.00342851		3395.97	0.00027304		3925.97	-0.01082636
216.2	-0.00210082		746.19	0.00723298		1276.19	0.00605312		1806.19	0.00096848		2336.18	0.00200364		2866.18	-0.00327482		3396.17	-0.00043109		3926.17	-0.01103934
216.4	-0.00179328		746.39	0.00807552		1276.39	0.00660125		1806.39	0.00228298		2336.38	0.00152054		2866.38	-0.00286686		3396.37	-0.00108745		3926.37	-0.00968844
216.6	-0.00144506		746.59	0.008888		1276.59	0.0068577		1806.59	0.00294449		2336.58	0.00228349		2866.58	-0.00285413		3396.57	-0.00118821		3926.57	-0.00954534
216.8	-0.0023213		746.79	0.01012464		1276.79	0.00786711		1806.79	0.00385372		2336.78	0.00255357		2866.78	-0.00240087		3396.77	-0.00159539		3926.77	-0.00919305
217	-0.00124394		746.99	0.01053503		1276.99	0.00832302		1806.99	0.00482941		2336.98	0.00219509		2866.98	-0.00210203		3396.97	-0.00195765		3926.97	-0.00858374
217.2	-0.00092583		747.19	0.01043399		1277.19	0.00861667		1807.19	0.00403587		2337.18	0.00147455		2867.18	-0.00256874		3397.17	-0.00210625		3927.17	-0.00864961
217.4	-0.00048782		747.39	0.01053333		1277.39	0.00832763		1807.39	0.00418615		2337.38	0.0016998		2867.38	-0.00208803		3397.37	-0.00235064		3927.37	-0.00779068
217.6	-0.00073158		747.59	0.01040452		1277.59	0.00809895		1807.59	0.00397667		2337.58	0.0020494		2867.58	-0.00198863		3397.57	-0.00183665		3927.57	-0.00787602
217.8	-0.00049633		747.79	0.01005492		1277.79	0.00767548		1807.79	0.00396559		2337.78	0.00046009		2867.78	-0.00119366		3397.77	-0.00188677		3927.77	-0.00738301
218	-0.0006449		747.99	0.00996186		1277.99	0.00706638		1807.99	0.00461164		2337.98	0.00026727		2867.98	-0.00122636		3397.97	-0.00169871		3927.97	-0.00649172
218.2	-0.00102804		748.19	0.00916932		1278.19	0.00646966		1808.19	0.00451477		2338.18	-0.0003077		2868.18	-0.00035858		3398.17	-0.00087081		3928.17	-0.00703245
218.4	-0.00073456		748.39	0.00787972		1278.39	0.00525786		1808.39	0.00397373		2338.38	-0.00129584		2868.38	0.00018244		3398.37	-0.00070025		3928.37	-0.00598098
218.6	-0.00053689		748.59	0.00764313		1278.59	0.00566435		1808.59	0.00365109		2338.58	-0.000563		2868.58	0.0004172		3398.57	-0.00053474		3928.57	-0.00623203
218.8	-0.00037304		748.79	0.00676151		1278.79	0.00515866		1808.79	0.00319379		2338.78	-0.00018802		2868.78	0.00015926		3398.77	0.00008395		3928.77	-0.00526216
219	-0.00005619		748.99	0.00623331		1278.99	0.00571765		1808.99	0.00286031		2338.98	-0.00014923		2868.98	-0.0005865		3398.97	-0.00010911		3928.97	-0.00550273
219.2	-0.00028902		749.19	0.0064951		1279.19	0.00516741		1809.19	0.00238678		2339.18	-0.0004113		2869.18	-0.00101661		3399.17	0.00029924		3929.17	-0.00671713
219.4	-0.00094767		749.39	0.00667017		1279.39	0.00615047		1809.39	0.00150002		2339.38	0.00052416		2869.38	-0.00165353		3399.37	0.00071645		3929.37	-0.00752721
219.6	-0.00090004		749.59	0.00661035		1279.59	0.00690979		1809.59	0.00150887		2339.58	0.00097242		2869.58	-0.0019338		3399.57	0.00059176		3929.57	-0.00763476
219.8	-0.00193284		749.79	0.00687174		1279.79	0.00723219		1809.79	0.00182612		2339.78	0.00162129		2869.78	-0.00142966		3399.77	-0.00004962		3929.77	-0.00891765
220	-0.00233246		749.99	0.00805388		1279.99	0.00797296		1809.99	0.00232523		2339.98	0.00145394		2869.98	-0.0017325		3399.97	-0.00108808		3929.97	-0.00840249
220.2	-0.00383028		750.19	0.0093251		1280.19	0.00818564		1810.19	0.00290981		2340.18	0.00155727		2870.18	-0.00106857		3400.17	-0.00239096		3930.17	-0.00829771
220.4	-0.00457722		750.39	0.00983258		1280.39	0.0087782		1810.39	0.00394773		2340.38	0.0025484		2870.38	-0.00088168		3400.37	-0.00162506		3930.37	-0.00751947
220.6	-0.00378017		750.59	0.01092735		1280.59	0.00823041		1810.59	0.00395141		2340.58	0.0032852		2870.58	-0.00062848		3400.57	-0.00151163		3930.57	-0.00846979
220.8	-0.00391794		750.79	0.0115262		1280.79	0.00865515		1810.79	0.00368322		2340.78	0.00359361		2870.78	-0.00008584		3400.77	-0.00152497		3930.77	-0.00874369
221	-0.00247678		750.99	0.01140278		1280.99	0.00918559		1810.99	0.0033295		2340.98	0.00429121		2870.98	-0.00033413		3400.97	-0.00155497		3930.97	-0.00939521
221.2	-0.0025547		751.19	0.01203988		1281.19	0.00883633		1811.19	0.00246784		2341.18	0.00431265		2871.18	-0.00033691		3401.17	-0.00122992		3931.17	-0.0098332
221.4	-0.00214574		751.39	0.01259853		1281.39	0.00733098		1811.39	0.00224334		2341.38	0.00447346		2871.38	0.00053344		3401.37	-0.0009672		3931.37	-0.00958652
221.6	-0.00266713		751.59	0.0121859		1281.59	0.00694278		1811.59	0.00210398		2341.58	0.00391678		2871.58	0.00123525		3401.57	-0.00018067		3931.57	-0.00917203
221.8	-0.00297468		751.79	0.01222742		1281.79	0.00610536		1811.79	0.00263484		2341.78	0.00304204		2871.78	0.00198021		3401.77	-0.00010363		3931.77	-0.00904073
222	-0.00392451		751.99	0.01171625		1281.99	0.00502155		1811.99	0.00153287		2341.98	0.00301431		2871.98	0.00206042		3401.97	0.00033115		3931.97	-0.00868384
222.2	-0.00465679		752.19	0.01122472		1282.19	0.00447111		1812.19	0.00196321		2342.18	0.00287542		2872.18	0.00248272		3402.17	0.00166575		3932.17	-0.00812307
222.4	-0.00433494		752.39	0.01005315		1282.39	0.00363076		1812.39	0.00165874		2342.38	0.00254282		2872.38	0.00208211		3402.37	0.00266949		3932.37	-0.0070597
222.6	-0.00438557		752.59	0.00958544		1282.59	0.0030148		1812.59	0.00063924		2342.58	0.00341051		2872.58	0.00186774		3402.57	0.00388922		3932.57	-0.00639775
222.8	-0.00419403		752.79	0.01007997		1282.79	0.00326684		1812.79	0.00111706		2342.78	0.00298399		2872.78	0.00135288		3402.77	0.0050979		3932.77	-0.00581344
223	-0.00368525		752.99	0.00988922		1282.99	0.00405756		1812.99	0.00065404		2342.98	0.00216611		2872.98	0.00061201		3402.97	0.00495889		3932.97	-0.00593825
223.2	-0.00377555		753.19	0.00930819		1283.19	0.00470097		1813.19	0.00105006		2343.18	0.00169366		2873.18	0.00039554		3403.17	0.00527064		3933.17	-0.00622331
223.4	-0.0034625		753.39	0.00904738		1283.39	0.00536113		1813.39	0.00037854		2343.38	0.00230339		2873.38	0.00033511		3403.37	0.00589776		3933.37	-0.00612642
223.6	-0.00218938		753.59	0.00863353		1283.59	0.00544977		1813.59	0.00103284		2343.58	0.00231277		2873.58	-0.00001191		3403.57	0.00571419		3933.57	-0.0067368
223.8	-0.0032795		753.79	0.00933823		1283.79	0.00557906		1813.79	0.00104962		2343.78	0.00236997		2873.78	-0.00049918		3403.77	0.00505735		3933.77	-0.00728279
224	-0.00320599		753.99	0.0095461		1283.99	0.00642402		1813.99	0.00124379		2343.98	0.00257149		2873.98	-0.0005974		3403.97	0.00388887		3933.97	-0.00667175
224.2	-0.00349511		754.19	0.00961489		1284.19	0.00706439		1814.19	0.00108942		2344.18	0.00332048		2874.18	-0.00092248		3404.17	0.00370956		3934.17	-0.00704596
224.4	-0.00275255		754.39	0.01088692		1284.39	0.00782402		1814.39	0.00148127		2344.38	0.00355235		2874.38	-0.00064833		3404.37	0.00412866		3934.37	-0.00742228
224.6	-0.00145335		754.59	0.01099462		1284.59	0.00858612		1814.59	0.00122987		2344.58	0.00421725		2874.58	-0.00012378		3404.57	0.0029844		3934.57	-0.00822035
224.8	-0.00153907		754.79	0.01072369		1284.79	0.00855557		1814.79	0.0005007		2344.78	0.00503092		2874.78	-0.00031567		3404.77	0.00224097		3934.77	-0.00866215
225	-0.00084536		754.99	0.01053798		1284.99	0.00960041		1814.99	0.00075909		2344.98	0.00497718		2874.98	-0.00023749		3404.97	0.00192307		3934.97	-0.00983856
225.2	-0.00137717		755.19	0.01199975		1285.19	0.009576		1815.19	0.00044883		2345.18	0.00474145		2875.18	-0.00015234		3405.17	0.00205622		3935.17	-0.01010734
225.4	-0.00136323		755.39	0.01205097		1285.39	0.00912136		1815.39	0.00079914		2345.38	0.00469735		2875.38	0.00052671		3405.37	0.00210724		3935.37	-0.00984199
225.6	-0.00138395		755.59	0.01114623		1285.59	0.01024273		1815.59	0.00129645		2345.58	0.0034897		2875.58	0.0007089		3405.57	0.0029043		3935.57	-0.00864681
225.8	-0.00155994		755.79	0.0108653		1285.79	0.01013698		1815.79	0.0010719		2345.78	0.00374032		2875.78	0.00101052		3405.77	0.00345382		3935.77	-0.00791635
226	-0.00159764		755.99	0.01086262		1285.99	0.00958412		1815.99	0.00114903		2345.98	0.00302216		2875.98	0.00099614		3405.97	0.00427851		3935.97	-0.0072345
226.2	-0.00151322		756.19	0.01053651		1286.19	0.00873237		1816.19	0.00221029		2346.18	0.00275606		2876.18	0.00115224		3406.17	0.00490128		3936.17	-0.00661008
226.4	-0.00042169		756.39	0.00971682		1286.39	0.00761571		1816.39	0.00165168		2346.38	0.00271749		2876.38	0.00034666		3406.37	0.00519411		3936.37	-0.00503848
226.6	-0.00111649		756.59	0.0096999		1286.59	0.00681986		1816.59	0.00162638		2346.58	0.00254		2876.58	0.00016726		3406.57	0.00511127		3936.57	-0.00400272
226.8	-0.0003581		756.79	0.01000919		1286.79	0.00784373		1816.79	0.00238967		2346.78	0.00210916		2876.78	-0.00112184		3406.77	0.00578259		3936.77	-0.00361355
227	-0.0000229		756.99	0.00986568		1286.99	0.00756977		1816.99	0.00176739		2346.98	0.00196905		2876.98	-0.00180925		3406.97	0.00552571		3936.97	-0.00410988
227.2	0.00020108		757.19	0.00978832		1287.19	0.00687518		1817.19	0.00188102		2347.18	0.00134004		2877.18	-0.00166063		3407.17	0.00588793		3937.17	-0.00409919
227.4	0.00028416		757.39	0.01017853		1287.39	0.00632721		1817.39	0.00113019		2347.38	0.0019142		2877.38	-0.00118982		3407.37	0.00600905		3937.37	-0.00439905
227.6	0.00054307		757.59	0.0100585		1287.59	0.00632503		1817.59	0.00142525		2347.58	0.0017743		2877.58	-0.00134516		3407.57	0.00585697		3937.57	-0.00479935
227.8	-0.00112652		757.79	0.01081005		1287.79	0.00643784		1817.79	0.00094569		2347.78	0.0018025		2877.78	-0.00116036		3407.77	0.00482693		3937.77	-0.00505532
228	-0.00166362		757.99	0.01101334		1287.99	0.00697517		1817.99	0.00039079		2347.98	0.0028654		2877.98	0.00017997		3407.97	0.00440525		3937.97	-0.00535643
228.2	-0.00141341		758.19	0.01155048		1288.19	0.00758047		1818.19	-0.0004626		2348.18	0.003213		2878.18	0.00050694		3408.17	0.00455003		3938.17	-0.00561023
228.4	-0.00204137		758.39	0.01213237		1288.39	0.00844853		1818.39	0.00014259		2348.38	0.00372829		2878.38	0.00184007		3408.37	0.00416468		3938.37	-0.00595217
228.6	-0.00218198		758.59	0.01185985		1288.59	0.00857593		1818.59	-0.00086725		2348.58	0.00503444		2878.58	0.00233474		3408.57	0.00406837		3938.57	-0.00621265
228.8	-0.00238053		758.79	0.01171646		1288.79	0.00864272		1818.79	-0.00094516		2348.78	0.00462432		2878.78	0.00235085		3408.77	0.00440634		3938.77	-0.00754187
229	-0.00279618		758.99	0.01295137		1288.99	0.00952867		1818.99	-0.00016265		2348.98	0.00406449		2878.98	0.00360471		3408.97	0.00525516		3938.97	-0.00785133
229.2	-0.00266623		759.19	0.0130651		1289.19	0.01017494		1819.19	-0.00020803		2349.18	0.0045622		2879.18	0.00493731		3409.17	0.0053326		3939.17	-0.00766604
229.4	-0.00233789		759.39	0.01268064		1289.39	0.0103202		1819.39	0.00053671		2349.38	0.00411766		2879.38	0.00583539		3409.37	0.00531673		3939.37	-0.00683508
229.6	-0.00228618		759.59	0.01205635		1289.59	0.01065699		1819.59	0.00121833		2349.58	0.0036043		2879.58	0.00615332		3409.57	0.00526848		3939.57	-0.00688371
229.8	-0.00222831		759.79	0.01106896		1289.79	0.01005891		1819.79	0.00122385		2349.78	0.00427004		2879.78	0.00634056		3409.77	0.00513002		3939.77	-0.00664543
230	-0.00175109		759.99	0.01062383		1289.99	0.00908179		1819.99	0.00187759		2349.98	0.0032639		2879.98	0.00567369		3409.97	0.00418283		3939.97	-0.00675326
230.2	-0.00123003		760.19	0.00945845		1290.19	0.00753019		1820.19	0.00192832		2350.18	0.00302882		2880.18	0.00516997		3410.17	0.00381714		3940.17	-0.00618525
230.4	-0.00037007		760.39	0.00876492		1290.39	0.00704134		1820.39	0.00209462		2350.38	0.00282288		2880.38	0.00434306		3410.37	0.00398092		3940.37	-0.00503559
230.6	-0.00122575		760.59	0.00867382		1290.59	0.00751789		1820.59	0.00251519		2350.58	0.00201506		2880.58	0.00382848		3410.57	0.0043758		3940.57	-0.00460355
230.8	-0.00017887		760.79	0.00880434		1290.79	0.00753339		1820.79	0.00253383		2350.78	0.00218457		2880.78	0.00180995		3410.77	0.00462709		3940.77	-0.00394652
231	-0.00053259		760.99	0.00891831		1290.99	0.00646735		1820.99	0.00228149		2350.98	0.00172938		2880.98	0.00185141		3410.97	0.00472962		3940.97	-0.0035439
231.2	-0.00041442		761.19	0.00859228		1291.19	0.00598459		1821.19	0.00188964		2351.18	0.00148969		2881.18	0.00076946		3411.17	0.00473373		3941.17	-0.00339195
231.4	-0.00067464		761.39	0.00786277		1291.39	0.00643532		1821.39	0.00218292		2351.38	0.0026737		2881.38	-0.0003219		3411.37	0.00504872		3941.37	-0.00337098
231.6	-0.00032526		761.59	0.00740032		1291.59	0.00654252		1821.59	0.0026036		2351.58	0.00248386		2881.58	-0.00083672		3411.57	0.00451812		3941.57	-0.00372707
231.8	-0.00063049		761.79	0.00753802		1291.79	0.00680971		1821.79	0.00292876		2351.78	0.00314346		2881.78	-0.00154351		3411.77	0.00348528		3941.77	-0.00347731
232	-0.00054568		761.99	0.00766985		1291.99	0.00701148		1821.99	0.00275431		2351.98	0.0038302		2881.98	-0.00209777		3411.97	0.00378521		3941.97	-0.00347581
232.2	-0.00020375		762.19	0.00802343		1292.19	0.00817647		1822.19	0.00257887		2352.18	0.00417949		2882.18	-0.00202321		3412.17	0.00392108		3942.17	-0.00374704
232.4	-0.0007852		762.39	0.0087152		1292.39	0.00904819		1822.39	0.00344117		2352.38	0.00508698		2882.38	-0.00192884		3412.37	0.00331002		3942.37	-0.00366283
232.6	-0.00067926		762.59	0.00880474		1292.59	0.00991266		1822.59	0.00255419		2352.58	0.00570041		2882.58	-0.00188674		3412.57	0.0042648		3942.57	-0.00434258
232.8	-0.00002602		762.79	0.00912007		1292.79	0.01101536		1822.79	0.0033479		2352.78	0.00508764		2882.78	-0.0019166		3412.77	0.00406738		3942.77	-0.00477677
233	0.00009977		762.99	0.01028911		1292.99	0.01141707		1822.99	0.00319451		2352.98	0.00592745		2882.98	-0.00107515		3412.97	0.00385258		3942.97	-0.00428348
233.2	0.00061635		763.19	0.01061255		1293.19	0.01221017		1823.19	0.00279262		2353.18	0.00634244		2883.18	-0.00048314		3413.17	0.0033088		3943.17	-0.00477059
233.4	0.00018083		763.39	0.01159564		1293.39	0.01191964		1823.39	0.00283553		2353.38	0.00621738		2883.38	0.00002979		3413.37	0.0036523		3943.37	-0.00468729
233.6	0.00030266		763.59	0.01196978		1293.59	0.01226079		1823.59	0.00254693		2353.58	0.00608989		2883.58	0.00068839		3413.57	0.00370906		3943.57	-0.00539336
233.8	0.00056355		763.79	0.01119408		1293.79	0.01214458		1823.79	0.00187854		2353.78	0.00613242		2883.78	0.00129867		3413.77	0.00392253		3943.77	-0.00471715
234	0.00024724		763.99	0.01152187		1293.99	0.01232465		1823.99	0.0023658		2353.98	0.00498673		2883.98	0.00196338		3413.97	0.0035436		3943.97	-0.0049432
234.2	0.00010389		764.19	0.01154384		1294.19	0.0116159		1824.19	0.00236468		2354.18	0.00478019		2884.18	0.00316038		3414.17	0.00444505		3944.17	-0.00474713
234.4	0.00014814		764.39	0.0114863		1294.39	0.01172261		1824.39	0.00282157		2354.38	0.0042817		2884.38	0.0037855		3414.37	0.00493247		3944.37	-0.0039978
234.6	0.00013843		764.59	0.01116033		1294.59	0.01216758		1824.59	0.00289147		2354.58	0.00328402		2884.58	0.00381501		3414.57	0.00564599		3944.57	-0.00374724
234.8	0.00037917		764.79	0.01126642		1294.79	0.01106723		1824.79	0.00287905		2354.78	0.00309762		2884.78	0.00343198		3414.77	0.00565467		3944.77	-0.00347324
235	0.00068194		764.99	0.01099744		1294.99	0.01027965		1824.99	0.00320524		2354.98	0.00279981		2884.98	0.00375177		3414.97	0.00585742		3944.97	-0.00360658
235.2	0.00118713		765.19	0.0108714		1295.19	0.0102746		1825.19	0.00390177		2355.18	0.00181288		2885.18	0.00275551		3415.17	0.00586976		3945.17	-0.00514639
235.4	0.00158033		765.39	0.01066236		1295.39	0.01010345		1825.39	0.00481143		2355.38	0.00085365		2885.38	0.00245789		3415.37	0.00544933		3945.37	-0.00576551
235.6	0.00214882		765.59	0.01065806		1295.59	0.0096895		1825.59	0.0058948		2355.58	0.00012088		2885.58	0.00289777		3415.57	0.00366384		3945.57	-0.00743696
235.8	0.0019253		765.79	0.01069111		1295.79	0.00944903		1825.79	0.00622614		2355.78	0.00035426		2885.78	0.00205739		3415.77	0.00327966		3945.77	-0.00778157
236	0.00161219		765.99	0.01098098		1295.99	0.00962674		1825.99	0.0052205		2355.98	-0.00002587		2885.98	0.00176209		3415.97	0.0032736		3945.97	-0.00911041
236.2	0.001801		766.19	0.01100727		1296.19	0.01048105		1826.19	0.00466885		2356.18	0.00077289		2886.18	0.00167124		3416.17	0.00287303		3946.17	-0.0095524
236.4	0.00224134		766.39	0.01110015		1296.39	0.01038631		1826.39	0.00434999		2356.38	0.00111467		2886.38	0.0011224		3416.37	0.00233436		3946.37	-0.00985772
236.6	0.00260501		766.59	0.01018265		1296.59	0.0111452		1826.59	0.00392295		2356.58	0.00132246		2886.58	0.00046832		3416.57	0.00335424		3946.57	-0.01027522
236.8	0.00361577		766.79	0.01065134		1296.79	0.01139987		1826.79	0.00311985		2356.78	0.00171286		2886.78	-0.00013109		3416.77	0.0028192		3946.77	-0.01051008
237	0.00271277		766.99	0.01192768		1296.99	0.0114367		1826.99	0.00190592		2356.98	0.00286347		2886.98	-0.00046178		3416.97	0.00311487		3946.97	-0.010427
237.2	0.00233853		767.19	0.0130568		1297.19	0.01181672		1827.19	0.0016015		2357.18	0.00329399		2887.18	-0.00009922		3417.17	0.00426872		3947.17	-0.01036317
237.4	0.00149701		767.39	0.01365899		1297.39	0.01129059		1827.39	0.0008881		2357.38	0.00408202		2887.38	-0.00049986		3417.37	0.00542378		3947.37	-0.00943134
237.6	0.00167413		767.59	0.01260976		1297.59	0.01090243		1827.59	0.0008494		2357.58	0.00546449		2887.58	-0.00069415		3417.57	0.0051588		3947.57	-0.00909855
237.8	0.00087598		767.79	0.01167252		1297.79	0.01050688		1827.79	0.0009707		2357.78	0.0071288		2887.78	-0.00069416		3417.77	0.0055252		3947.77	-0.00796147
238	0.00046341		767.99	0.01197709		1297.99	0.0102375		1827.99	0.00139199		2357.98	0.00732341		2887.98	-0.00036764		3417.97	0.0057296		3947.97	-0.00711792
238.2	0.00006733		768.19	0.01139144		1298.19	0.01024817		1828.19	0.00152189		2358.18	0.00774233		2888.18	-0.00005084		3418.17	0.00663435		3948.17	-0.00712466
238.4	0.00052067		768.39	0.01051358		1298.39	0.0095992		1828.39	0.00246071		2358.38	0.00773327		2888.38	-0.00034241		3418.37	0.00664831		3948.37	-0.0063719
238.6	0.00083059		768.59	0.01020302		1298.59	0.00981866		1828.59	0.00288247		2358.58	0.00796599		2888.58	-0.00005573		3418.57	0.00705469		3948.57	-0.00590932
238.8	0.0010121		768.79	0.0107258		1298.79	0.00937741		1828.79	0.00378411		2358.78	0.00809447		2888.78	-0.0011517		3418.77	0.00685841		3948.77	-0.00539323
239	0.00151899		768.99	0.01022552		1298.99	0.00967667		1828.99	0.00459083		2358.98	0.0073728		2888.98	-0.00197255		3418.97	0.0068675		3948.97	-0.00525103
239.2	0.00094245		769.19	0.01118857		1299.19	0.00968889		1829.19	0.00547348		2359.18	0.00728923		2889.18	-0.00216775		3419.17	0.00630494		3949.17	-0.00544166
239.4	0.00074907		769.39	0.01132173		1299.39	0.00908802		1829.39	0.00586229		2359.38	0.00763034		2889.38	-0.00197818		3419.37	0.00509923		3949.37	-0.00579772
239.6	0.00070663		769.59	0.01167347		1299.59	0.00921251		1829.59	0.00688665		2359.58	0.00778441		2889.58	-0.00128915		3419.57	0.00372019		3949.57	-0.00634785
239.8	0.0007687		769.79	0.01138522		1299.79	0.01049865		1829.79	0.00674911		2359.78	0.00707922		2889.78	-0.00196453		3419.77	0.00353181		3949.77	-0.00646999
240	0.00034493		769.99	0.0110196		1299.99	0.01047962		1829.99	0.00644006		2359.98	0.0059304		2889.98	-0.00212594		3419.97	0.00269118		3949.97	-0.00783474
240.2	0.00094839		770.19	0.01106153		1300.19	0.01072404		1830.19	0.00611523		2360.18	0.00591897		2890.18	-0.00173194		3420.17	0.00186644		3950.17	-0.00811289
240.4	0.00159224		770.39	0.01089493		1300.39	0.01081885		1830.39	0.00646633		2360.38	0.00423689		2890.38	-0.00188641		3420.37	0.00190169		3950.37	-0.00853739
240.6	0.00182591		770.59	0.01021101		1300.59	0.01191425		1830.59	0.00598016		2360.58	0.00319599		2890.58	-0.00118212		3420.57	0.00221622		3950.57	-0.00866954
240.8	0.00116894		770.79	0.01085095		1300.79	0.01219906		1830.79	0.00457207		2360.78	0.00308339		2890.78	-0.00023109		3420.77	0.00201725		3950.77	-0.00919772
241	0.00053877		770.99	0.01128786		1300.99	0.01263179		1830.99	0.00376361		2360.98	0.00258006		2890.98	0.00050257		3420.97	0.00240005		3950.97	-0.00930432
241.2	0.0001569		771.19	0.01134846		1301.19	0.01249462		1831.19	0.00267273		2361.18	0.00193797		2891.18	0.00116971		3421.17	0.0031109		3951.17	-0.00894447
241.4	-0.00038516		771.39	0.01060547		1301.39	0.01237806		1831.39	0.00165813		2361.38	0.00198443		2891.38	0.00117346		3421.37	0.00328499		3951.37	-0.00853238
241.6	-0.00050486		771.59	0.01029007		1301.59	0.01196559		1831.59	0.00171671		2361.58	0.00204188		2891.58	0.00113836		3421.57	0.00339841		3951.57	-0.008667
241.8	-0.00058402		771.79	0.01073662		1301.79	0.01269139		1831.79	0.00052648		2361.78	0.00209943		2891.78	0.00138464		3421.77	0.00527501		3951.77	-0.00840774
242	0.00059148		771.99	0.01064937		1301.99	0.01302419		1831.99	0.00057551		2361.98	0.00159468		2891.98	0.00084313		3421.97	0.00618755		3951.97	-0.00779613
242.2	0.00040009		772.19	0.00991956		1302.19	0.0132028		1832.19	-0.00005845		2362.18	0.00205298		2892.18	0.00094836		3422.17	0.00647685		3952.17	-0.00784741
242.4	0.00089431		772.39	0.00990501		1302.39	0.01190581		1832.39	-0.00008735		2362.38	0.00235676		2892.38	0.00000737		3422.37	0.00664464		3952.37	-0.00732286
242.6	0.00178536		772.59	0.0101648		1302.59	0.01269363		1832.59	-0.00047016		2362.58	0.00335585		2892.58	-0.00010572		3422.57	0.00710673		3952.57	-0.00652848
242.8	0.0014688		772.79	0.01032886		1302.79	0.01270981		1832.79	-0.00010847		2362.78	0.00416969		2892.78	-0.00147736		3422.77	0.00716464		3952.77	-0.00610732
243	0.00112394		772.99	0.01027526		1302.99	0.01289402		1832.99	-0.00011618		2362.98	0.00400328		2892.98	-0.00206102		3422.97	0.00778811		3952.97	-0.00562712
243.2	0.00049407		773.19	0.01106489		1303.19	0.01229849		1833.19	0.00010552		2363.18	0.00490464		2893.18	-0.00149957		3423.17	0.00644736		3953.17	-0.00550261
243.4	0.00036795		773.39	0.01164753		1303.39	0.01218102		1833.39	0.00193237		2363.38	0.00420584		2893.38	-0.00110652		3423.37	0.00527973		3953.37	-0.00622481
243.6	0.00087323		773.59	0.01197229		1303.59	0.01258507		1833.59	0.00307734		2363.58	0.00473565		2893.58	-0.0013556		3423.57	0.00437189		3953.57	-0.00642452
243.8	0.00094196		773.79	0.01139614		1303.79	0.01237113		1833.79	0.00452585		2363.78	0.00506222		2893.78	-0.00106003		3423.77	0.00460151		3953.77	-0.00711791
244	0.0005199		773.99	0.0112236		1303.99	0.01072001		1833.99	0.00504399		2363.98	0.00476842		2893.98	0.0002137		3423.97	0.00385978		3953.97	-0.00767938
244.2	0.00156327		774.19	0.01092912		1304.19	0.01057881		1834.19	0.00516742		2364.18	0.00391882		2894.18	0.00079843		3424.17	0.00323891		3954.17	-0.00725799
244.4	0.00205279		774.39	0.01070541		1304.39	0.01114596		1834.39	0.00546615		2364.38	0.0041554		2894.38	0.00115255		3424.37	0.00289946		3954.37	-0.00693085
244.6	0.00261083		774.59	0.01160499		1304.59	0.0105212		1834.59	0.00495507		2364.58	0.00406735		2894.58	0.00259829		3424.57	0.00220264		3954.57	-0.00661731
244.8	0.00144539		774.79	0.01146661		1304.79	0.01004748		1834.79	0.00430417		2364.78	0.0041459		2894.78	0.00369593		3424.77	0.00183163		3954.77	-0.00700185
245	0.00194585		774.99	0.01115454		1304.99	0.01002833		1834.99	0.00441671		2364.98	0.00389893		2894.98	0.00448692		3424.97	0.00238703		3954.97	-0.00682771
245.2	0.00158276		775.19	0.01150021		1305.19	0.01008586		1835.19	0.00370527		2365.18	0.0033732		2895.18	0.00397573		3425.17	0.00338973		3955.17	-0.00680818
245.4	0.00204238		775.39	0.01129759		1305.39	0.01080596		1835.39	0.00407532		2365.38	0.00299832		2895.38	0.00406194		3425.37	0.00417104		3955.37	-0.00667673
245.6	0.00203618		775.59	0.01180728		1305.59	0.01103778		1835.59	0.00382563		2365.58	0.00239545		2895.58	0.00337354		3425.57	0.0051665		3955.57	-0.00692085
245.8	0.0030159		775.79	0.01151255		1305.79	0.01196753		1835.79	0.00302312		2365.78	0.00226761		2895.78	0.00316843		3425.77	0.00552092		3955.77	-0.00659784
246	0.00426332		775.99	0.01082544		1305.99	0.01277271		1835.99	0.00337166		2365.98	0.00191112		2895.98	0.00267771		3425.97	0.00508987		3955.97	-0.00543748
246.2	0.00421475		776.19	0.01053141		1306.19	0.01216556		1836.19	0.00267749		2366.18	0.00263141		2896.18	0.00298618		3426.17	0.0045509		3956.17	-0.00582175
246.4	0.00411415		776.39	0.01114502		1306.39	0.01199893		1836.39	0.0025524		2366.38	0.00304848		2896.38	0.00185068		3426.37	0.00557234		3956.37	-0.005961
246.6	0.00402994		776.59	0.01085307		1306.59	0.01342955		1836.59	0.00287364		2366.58	0.0038838		2896.58	0.00172802		3426.57	0.00522587		3956.57	-0.00569344
246.8	0.00268629		776.79	0.01071879		1306.79	0.01368788		1836.79	0.00354141		2366.78	0.00418022		2896.78	0.00158063		3426.77	0.00543955		3956.77	-0.00545615
247	0.00142547		776.99	0.01116497		1306.99	0.01391065		1836.99	0.00378224		2366.98	0.00329814		2896.98	0.000396		3426.97	0.00554717		3956.97	-0.00555954
247.2	0.00089626		777.19	0.01170711		1307.19	0.01345142		1837.19	0.00412479		2367.18	0.00348068		2897.18	0.00059203		3427.17	0.00454463		3957.17	-0.00559382
247.4	0.00056278		777.39	0.01235408		1307.39	0.01351796		1837.39	0.00545848		2367.38	0.00352041		2897.38	-0.00021492		3427.37	0.00389214		3957.37	-0.00631891
247.6	0.00037528		777.59	0.01158833		1307.59	0.01306746		1837.59	0.00570087		2367.58	0.00446335		2897.58	-0.00091633		3427.57	0.00386582		3957.57	-0.00662609
247.8	0.00052798		777.79	0.01195482		1307.79	0.01247839		1837.79	0.00574968		2367.78	0.00466217		2897.78	0.00016712		3427.77	0.00413286		3957.77	-0.00664105
248	0.00081108		777.99	0.0111282		1307.99	0.0127257		1837.99	0.00465486		2367.98	0.0048965		2897.98	0.00091474		3427.97	0.00373925		3957.97	-0.00717344
248.2	0.00147134		778.19	0.01082523		1308.19	0.0123089		1838.19	0.00404748		2368.18	0.00532803		2898.18	0.0005103		3428.17	0.0038441		3958.17	-0.00704241
248.4	0.0017982		778.39	0.01190648		1308.39	0.01167992		1838.39	0.00382786		2368.38	0.00633443		2898.38	0.00216723		3428.37	0.00389305		3958.37	-0.00757963
248.6	0.00163679		778.59	0.01211035		1308.59	0.01021764		1838.59	0.00330135		2368.58	0.00613564		2898.58	0.00314449		3428.57	0.00432926		3958.57	-0.00735812
248.8	0.00110309		778.79	0.01153781		1308.79	0.00990058		1838.79	0.00293313		2368.78	0.0059014		2898.78	0.00454839		3428.77	0.00526078		3958.77	-0.00789805
249	0.00206062		778.99	0.01119055		1308.99	0.00970475		1838.99	0.00285722		2368.98	0.00608154		2898.98	0.00474263		3428.97	0.00584145		3958.97	-0.00815619
249.2	0.00231231		779.19	0.01082538		1309.19	0.00977823		1839.19	0.00217283		2369.18	0.00565384		2899.18	0.00447903		3429.17	0.00626596		3959.17	-0.00768898
249.4	0.00294148		779.39	0.01103591		1309.39	0.00965323		1839.39	0.00256437		2369.38	0.004416		2899.38	0.00561084		3429.37	0.00660303		3959.37	-0.00715431
249.6	0.00317236		779.59	0.01083892		1309.59	0.00940459		1839.59	0.002304		2369.58	0.00464945		2899.58	0.00545416		3429.57	0.00617148		3959.57	-0.00679496
249.8	0.00395175		779.79	0.01072819		1309.79	0.00955021		1839.79	0.00232357		2369.78	0.00391819		2899.78	0.00571396		3429.77	0.0057368		3959.77	-0.00563082
250	0.004026		779.99	0.0100772		1309.99	0.00965017		1839.99	0.00241511		2369.98	0.0039253		2899.98	0.00646747		3429.97	0.0057376		3959.97	-0.00435757
250.2	0.00397603		780.19	0.01050035		1310.19	0.0088485		1840.19	0.00193639		2370.18	0.00422383		2900.18	0.00611612		3430.17	0.00567833		3960.17	-0.00444656
250.4	0.00372733		780.39	0.01066898		1310.39	0.00952031		1840.39	0.00194153		2370.38	0.00403322		2900.38	0.00607169		3430.37	0.00561553		3960.37	-0.00335744
250.6	0.0024084		780.59	0.00982572		1310.59	0.00956011		1840.59	0.00242629		2370.58	0.00388072		2900.58	0.00607855		3430.57	0.00437649		3960.57	-0.00231044
250.8	0.0017803		780.79	0.01025575		1310.79	0.00929657		1840.79	0.00272111		2370.78	0.00367246		2900.78	0.004553		3430.77	0.00461813		3960.77	-0.00188705
251	0.00063292		780.99	0.01092108		1310.99	0.01010623		1840.99	0.00331525		2370.98	0.00286872		2900.98	0.00252102		3430.97	0.00445103		3960.97	-0.00177009
251.2	0.00097028		781.19	0.01072456		1311.19	0.01073759		1841.19	0.00329855		2371.18	0.00285789		2901.18	0.00205014		3431.17	0.00405639		3961.17	-0.00169629
251.4	0.0013391		781.39	0.01075543		1311.39	0.01183694		1841.39	0.00339624		2371.38	0.00282472		2901.38	0.00095827		3431.37	0.00373365		3961.37	-0.00226998
251.6	0.00200319		781.59	0.01045664		1311.59	0.0121313		1841.59	0.00398715		2371.58	0.00324965		2901.58	0.00087413		3431.57	0.004669		3961.57	-0.0023838
251.8	0.00289516		781.79	0.01118416		1311.79	0.01349386		1841.79	0.0034063		2371.78	0.00325651		2901.78	0.00150751		3431.77	0.00526491		3961.77	-0.00213776
252	0.00320325		781.99	0.01059023		1311.99	0.01372424		1841.99	0.00311927		2371.98	0.00305273		2901.98	0.00125122		3431.97	0.00513675		3961.97	-0.00309756
252.2	0.00313673		782.19	0.01124965		1312.19	0.01364482		1842.19	0.00380782		2372.18	0.00277959		2902.18	0.00127717		3432.17	0.00517318		3962.17	-0.00309173
252.4	0.00352242		782.39	0.01198031		1312.39	0.01424931		1842.39	0.00485441		2372.38	0.00301562		2902.38	0.00208661		3432.37	0.00482451		3962.37	-0.00398645
252.6	0.00364121		782.59	0.01185021		1312.59	0.01426706		1842.59	0.00468145		2372.58	0.00321031		2902.58	0.00168765		3432.57	0.0052234		3962.57	-0.00425558
252.8	0.00376066		782.79	0.01273773		1312.79	0.01386755		1842.79	0.00516116		2372.78	0.00351809		2902.78	0.00316002		3432.77	0.00551854		3962.77	-0.00500182
253	0.0044258		782.99	0.01304586		1312.99	0.01420985		1842.99	0.00558455		2372.98	0.00381956		2902.98	0.00307719		3432.97	0.00460417		3962.97	-0.00590666
253.2	0.0044306		783.19	0.01470042		1313.19	0.0148042		1843.19	0.0057943		2373.18	0.00346093		2903.18	0.00287247		3433.17	0.00516663		3963.17	-0.00581271
253.4	0.00389962		783.39	0.01548368		1313.39	0.01457968		1843.39	0.00601034		2373.38	0.00282022		2903.38	0.00316128		3433.37	0.00510529		3963.37	-0.00646003
253.6	0.0037		783.59	0.01567756		1313.59	0.01361168		1843.59	0.00576356		2373.58	0.00382275		2903.58	0.00326468		3433.57	0.00487991		3963.57	-0.00609677
253.8	0.00330478		783.79	0.01577112		1313.79	0.01302813		1843.79	0.00514627		2373.78	0.00320371		2903.78	0.00446197		3433.77	0.00504944		3963.77	-0.0055385
254	0.00345114		783.99	0.01533233		1313.99	0.01272083		1843.99	0.00516469		2373.98	0.00428549		2903.98	0.00472876		3433.97	0.0045971		3963.97	-0.00529317
254.2	0.00413322		784.19	0.01590984		1314.19	0.01262525		1844.19	0.00470612		2374.18	0.00437061		2904.18	0.00432495		3434.17	0.00444741		3964.17	-0.00501568
254.4	0.00426683		784.39	0.01520391		1314.39	0.01249496		1844.39	0.0039498		2374.38	0.00430515		2904.38	0.00386294		3434.37	0.00425411		3964.37	-0.00432317
254.6	0.00318016		784.59	0.01495544		1314.59	0.01177855		1844.59	0.00374411		2374.58	0.00519424		2904.58	0.00310643		3434.57	0.00425332		3964.57	-0.00415992
254.8	0.00355725		784.79	0.01548499		1314.79	0.01202095		1844.79	0.00372948		2374.78	0.00510648		2904.78	0.00237626		3434.77	0.0054352		3964.77	-0.00405179
255	0.00326633		784.99	0.01469309		1314.99	0.01224706		1844.99	0.00307712		2374.98	0.00522381		2904.98	0.00215902		3434.97	0.00555129		3964.97	-0.00401322
255.2	0.00392866		785.19	0.01375282		1315.19	0.01206878		1845.19	0.0020911		2375.18	0.00588796		2905.18	0.00209143		3435.17	0.00518925		3965.17	-0.00408534
255.4	0.00370547		785.39	0.01321067		1315.39	0.01163		1845.39	0.0019459		2375.38	0.0056712		2905.38	0.00171333		3435.37	0.00578085		3965.37	-0.0045588
255.6	0.00424273		785.59	0.01306326		1315.59	0.01096174		1845.59	0.0023393		2375.58	0.0055443		2905.58	0.00165434		3435.57	0.00575725		3965.57	-0.00452129
255.8	0.00437884		785.79	0.013593		1315.79	0.01090886		1845.79	0.00147204		2375.78	0.00485181		2905.78	0.00187887		3435.77	0.00573827		3965.77	-0.00439407
256	0.00376382		785.99	0.01351378		1315.99	0.0103426		1845.99	0.00124867		2375.98	0.00462606		2905.98	0.0021506		3435.97	0.00488561		3965.97	-0.0057439
256.2	0.00362567		786.19	0.01399749		1316.19	0.0111343		1846.19	0.00066041		2376.18	0.00498558		2906.18	0.00202412		3436.17	0.00475637		3966.17	-0.00584606
256.4	0.00451811		786.39	0.01386823		1316.39	0.01113399		1846.39	0.0001907		2376.38	0.00495139		2906.38	0.0016907		3436.37	0.003988		3966.37	-0.00635277
256.6	0.00381456		786.59	0.01388246		1316.59	0.01079288		1846.59	-0.00090388		2376.58	0.00459369		2906.58	0.0026286		3436.57	0.00471656		3966.57	-0.00681731
256.8	0.00304122		786.79	0.01494512		1316.79	0.01094852		1846.79	-0.00040998		2376.78	0.00468942		2906.78	0.00347771		3436.77	0.00440716		3966.77	-0.00655828
257	0.00281964		786.99	0.01560794		1316.99	0.01160816		1846.99	-0.00013095		2376.98	0.00426298		2906.98	0.00457819		3436.97	0.00327717		3966.97	-0.00717822
257.2	0.00201452		787.19	0.01550428		1317.19	0.0112037		1847.19	-0.00029398		2377.18	0.00404456		2907.18	0.0047251		3437.17	0.0041574		3967.17	-0.00659304
257.4	0.00062714		787.39	0.01490214		1317.39	0.01053914		1847.39	0.00085885		2377.38	0.00400069		2907.38	0.0052555		3437.37	0.00426793		3967.37	-0.00651291
257.6	0.00082236		787.59	0.01494957		1317.59	0.00928104		1847.59	0.00129305		2377.58	0.0040347		2907.58	0.00566306		3437.57	0.00451818		3967.57	-0.00529405
257.8	0.00159018		787.79	0.01430036		1317.79	0.00935911		1847.79	0.00315632		2377.78	0.00431126		2907.78	0.00563703		3437.77	0.00432719		3967.77	-0.00508602
258	0.00242469		787.99	0.01417011		1317.99	0.00945167		1847.99	0.00421344		2377.98	0.0044985		2907.98	0.00466448		3437.97	0.00462531		3967.97	-0.00496103
258.2	0.00271037		788.19	0.01462934		1318.19	0.00947196		1848.19	0.00438858		2378.18	0.00393392		2908.18	0.00387569		3438.17	0.00452818		3968.17	-0.00460058
258.4	0.00276018		788.39	0.01344008		1318.39	0.00962011		1848.39	0.00445759		2378.38	0.00414991		2908.38	0.00334496		3438.37	0.00438048		3968.37	-0.00483603
258.6	0.00292025		788.59	0.01275699		1318.59	0.00866525		1848.59	0.00541299		2378.58	0.00498502		2908.58	0.00331178		3438.57	0.00509984		3968.57	-0.00542631
258.8	0.00375192		788.79	0.01221041		1318.79	0.0085242		1848.79	0.00585019		2378.78	0.00461932		2908.78	0.00275237		3438.77	0.00533367		3968.77	-0.00596402
259	0.00365624		788.99	0.01153355		1318.99	0.00842864		1848.99	0.00568346		2378.98	0.00472999		2908.98	0.00215083		3438.97	0.00543262		3968.97	-0.00644696
259.2	0.00360232		789.19	0.01189599		1319.19	0.00858582		1849.19	0.00639183		2379.18	0.00479339		2909.18	0.00130172		3439.17	0.00517487		3969.17	-0.00662227
259.4	0.0031601		789.39	0.01274769		1319.39	0.00895547		1849.39	0.00652404		2379.38	0.00457781		2909.38	0.00049231		3439.37	0.00543591		3969.37	-0.00709145
259.6	0.0037402		789.59	0.01267616		1319.59	0.00961893		1849.59	0.00573454		2379.58	0.00491427		2909.58	0.00034339		3439.57	0.00590224		3969.57	-0.00707728
259.8	0.00317306		789.79	0.01244806		1319.79	0.01057252		1849.79	0.00457116		2379.78	0.0049052		2909.78	0.00022109		3439.77	0.00659449		3969.77	-0.00728511
260	0.00263176		789.99	0.01224575		1319.99	0.01230109		1849.99	0.00429724		2379.98	0.00421883		2909.98	0.00075688		3439.97	0.00593625		3969.97	-0.00825743
260.2	0.00413099		790.19	0.01235779		1320.19	0.01301795		1850.19	0.00256048		2380.18	0.00421657		2910.18	0.00039312		3440.17	0.00625593		3970.17	-0.00803153
260.4	0.00453823		790.39	0.01249361		1320.39	0.01276958		1850.39	0.00221517		2380.38	0.00352146		2910.38	0.00112252		3440.37	0.00624637		3970.37	-0.00790293
260.6	0.00398618		790.59	0.01246364		1320.59	0.01272073		1850.59	0.00087213		2380.58	0.00367517		2910.58	0.0025559		3440.57	0.00674307		3970.57	-0.00715537
260.8	0.00461012		790.79	0.0136167		1320.79	0.01281059		1850.79	0.00100692		2380.78	0.00366893		2910.78	0.00363374		3440.77	0.00603912		3970.77	-0.00559557
261	0.00472572		790.99	0.01349496		1320.99	0.01344803		1850.99	0.00074875		2380.98	0.00335401		2910.98	0.00537136		3440.97	0.00518048		3970.97	-0.00494159
261.2	0.00429493		791.19	0.01290883		1321.19	0.01371568		1851.19	0.00118874		2381.18	0.00289282		2911.18	0.00552795		3441.17	0.00506681		3971.17	-0.00411714
261.4	0.0045193		791.39	0.01327726		1321.39	0.01404319		1851.39	0.00191061		2381.38	0.00304717		2911.38	0.00571656		3441.37	0.00451341		3971.37	-0.00345207
261.6	0.0048824		791.59	0.01253784		1321.59	0.01431613		1851.59	0.00220077		2381.58	0.00306909		2911.58	0.00579801		3441.57	0.00355655		3971.57	-0.00335317
261.8	0.00509538		791.79	0.01321557		1321.79	0.01457356		1851.79	0.00260122		2381.78	0.00371483		2911.78	0.0057557		3441.77	0.00251356		3971.77	-0.00380714
262	0.00504416		791.99	0.01403897		1321.99	0.01434255		1851.99	0.00215956		2381.98	0.00379346		2911.98	0.00622218		3441.97	0.00219811		3971.97	-0.00360879
262.2	0.0045143		792.19	0.01420581		1322.19	0.01406762		1852.19	0.00215382		2382.18	0.00455712		2912.18	0.00584398		3442.17	0.00145853		3972.17	-0.00313058
262.4	0.00394112		792.39	0.01391771		1322.39	0.01455361		1852.39	0.00283351		2382.38	0.00536171		2912.38	0.00611411		3442.37	0.00083174		3972.37	-0.0030789
262.6	0.00401869		792.59	0.01425281		1322.59	0.01315896		1852.59	0.00294108		2382.58	0.00442334		2912.58	0.00573689		3442.57	0.00104501		3972.57	-0.00383306
262.8	0.0035269		792.79	0.01471198		1322.79	0.01392178		1852.79	0.00363738		2382.78	0.00449061		2912.78	0.00493858		3442.77	0.00026007		3972.77	-0.00381147
263	0.00317458		792.99	0.01493812		1322.99	0.0143556		1852.99	0.00352667		2382.98	0.00453969		2912.98	0.00343369		3442.97	-0.00030372		3972.97	-0.00398625
263.2	0.00248063		793.19	0.01474413		1323.19	0.01463972		1853.19	0.00311002		2383.18	0.00381915		2913.18	0.00213004		3443.17	-0.00004127		3973.17	-0.0036294
263.4	0.00165672		793.39	0.01415721		1323.39	0.01405744		1853.39	0.00280277		2383.38	0.00324871		2913.38	0.00117911		3443.37	0.00002906		3973.37	-0.00434596
263.6	0.00175122		793.59	0.01260122		1323.59	0.01413593		1853.59	0.00298604		2383.58	0.00341191		2913.58	0.00091414		3443.57	0.00120624		3973.57	-0.00534519
263.8	0.00116185		793.79	0.01278342		1323.79	0.01423808		1853.79	0.0028637		2383.78	0.00309651		2913.78	0.00033586		3443.77	0.00156185		3973.77	-0.00599159
264	0.00241796		793.99	0.01331976		1323.99	0.01453163		1853.99	0.00335739		2383.98	0.00350573		2913.98	0.0003739		3443.97	0.00323358		3973.97	-0.00743239
264.2	0.00300271		794.19	0.0137161		1324.19	0.01352412		1854.19	0.00321217		2384.18	0.00427988		2914.18	-0.00036857		3444.17	0.00452602		3974.17	-0.0078109
264.4	0.00271956		794.39	0.01419742		1324.39	0.01245328		1854.39	0.00304616		2384.38	0.00463101		2914.38	-0.0001023		3444.37	0.00546191		3974.37	-0.00729597
264.6	0.0025945		794.59	0.01409909		1324.59	0.01227049		1854.59	0.00252826		2384.58	0.00504801		2914.58	-0.00042002		3444.57	0.0055594		3974.57	-0.00658121
264.8	0.00284974		794.79	0.01363884		1324.79	0.01192222		1854.79	0.0034516		2384.78	0.00510815		2914.78	-0.00018764		3444.77	0.0055132		3974.77	-0.00617702
265	0.00290402		794.99	0.01318807		1324.99	0.0121523		1854.99	0.00421803		2384.98	0.00460275		2914.98	-0.00075136		3444.97	0.00538179		3974.97	-0.00663299
265.2	0.003085		795.19	0.01254748		1325.19	0.01194088		1855.19	0.00454464		2385.18	0.00558172		2915.18	-0.00037542		3445.17	0.0063148		3975.17	-0.00711359
265.4	0.00396732		795.39	0.01316242		1325.39	0.01192753		1855.39	0.00501057		2385.38	0.00606396		2915.38	0.000243		3445.37	0.00636255		3975.37	-0.00682436
265.6	0.00288812		795.59	0.01292984		1325.59	0.01231068		1855.59	0.00576127		2385.58	0.00622557		2915.58	0.00105001		3445.57	0.00571548		3975.57	-0.00646522
265.8	0.0026471		795.79	0.01446148		1325.79	0.0122462		1855.79	0.00561712		2385.78	0.00564426		2915.78	0.0026555		3445.77	0.00525283		3975.77	-0.00554562
266	0.00277998		795.99	0.0151208		1325.99	0.01232681		1855.99	0.00634639		2385.98	0.00573906		2915.98	0.00264344		3445.97	0.00550138		3975.97	-0.00492771
266.2	0.00209621		796.19	0.01496547		1326.19	0.01246352		1856.19	0.0067343		2386.18	0.00581992		2916.18	0.00248849		3446.17	0.0050165		3976.17	-0.00464745
266.4	0.00170838		796.39	0.01591231		1326.39	0.01325688		1856.39	0.00716731		2386.38	0.00532339		2916.38	0.00356761		3446.37	0.00456091		3976.37	-0.0040518
266.6	0.00195236		796.59	0.01538299		1326.59	0.0130207		1856.59	0.00702296		2386.58	0.00413985		2916.58	0.00357358		3446.57	0.00405369		3976.57	-0.00428107
266.8	0.00216363		796.79	0.01413205		1326.79	0.01391804		1856.79	0.00717773		2386.78	0.00492876		2916.78	0.00346535		3446.77	0.00302865		3976.77	-0.00380115
267	0.00298221		796.99	0.01368736		1326.99	0.0139238		1856.99	0.00660677		2386.98	0.00398073		2916.98	0.00257106		3446.97	0.00227037		3976.97	-0.00391232
267.2	0.00272081		797.19	0.01357169		1327.19	0.0137859		1857.19	0.00604002		2387.18	0.0034739		2917.18	0.00309636		3447.17	0.00263344		3977.17	-0.00359988
267.4	0.00217387		797.39	0.01393241		1327.39	0.0134307		1857.39	0.00606107		2387.38	0.00393963		2917.38	0.00318284		3447.37	0.00180452		3977.37	-0.00430484
267.6	0.00327653		797.59	0.01363333		1327.59	0.01418541		1857.59	0.00627624		2387.58	0.00502823		2917.58	0.00282909		3447.57	0.00255486		3977.57	-0.00445771
267.8	0.00379052		797.79	0.01429193		1327.79	0.01507242		1857.79	0.00627408		2387.78	0.00521096		2917.78	0.00294939		3447.77	0.00299809		3977.77	-0.00375287
268	0.00462495		797.99	0.01396116		1327.99	0.01483024		1857.99	0.00696939		2387.98	0.00598034		2917.98	0.00270227		3447.97	0.00490048		3977.97	-0.0038475
268.2	0.00429852		798.19	0.01440525		1328.19	0.01475166		1858.19	0.00667913		2388.18	0.00614756		2918.18	0.00214106		3448.17	0.00467788		3978.17	-0.00386198
268.4	0.00509887		798.39	0.01402507		1328.39	0.01389375		1858.39	0.00660877		2388.38	0.00595685		2918.38	0.00169326		3448.37	0.00532825		3978.37	-0.00353609
268.6	0.00508672		798.59	0.01323478		1328.59	0.01365087		1858.59	0.00647237		2388.58	0.00588003		2918.58	0.00204327		3448.57	0.00495259		3978.57	-0.00371144
268.8	0.00570884		798.79	0.01240496		1328.79	0.01347746		1858.79	0.00603537		2388.78	0.00582599		2918.78	0.00157625		3448.77	0.00517723		3978.77	-0.00458488
269	0.00586354		798.99	0.01300159		1328.99	0.01326697		1858.99	0.00631283		2388.98	0.00547975		2918.98	0.00092396		3448.97	0.00590417		3978.97	-0.00506097
269.2	0.00569081		799.19	0.01330773		1329.19	0.01317075		1859.19	0.00564832		2389.18	0.00576536		2919.18	0.0014156		3449.17	0.00636624		3979.17	-0.00475878
269.4	0.00498201		799.39	0.01372469		1329.39	0.01355384		1859.39	0.00617591		2389.38	0.00505716		2919.38	0.00121221		3449.37	0.00567198		3979.37	-0.00389218
269.6	0.00397794		799.59	0.01308634		1329.59	0.0136037		1859.59	0.00559423		2389.58	0.00488473		2919.58	0.00079392		3449.57	0.00524125		3979.57	-0.00336795
269.8	0.00393302		799.79	0.01394529		1329.79	0.01348156		1859.79	0.00473205		2389.78	0.00452566		2919.78	0.00067989		3449.77	0.00607577		3979.77	-0.00402347
270	0.0040753		799.99	0.01410407		1329.99	0.01375094		1859.99	0.00406229		2389.98	0.00577644		2919.98	-0.00077301		3449.97	0.00617978		3979.97	-0.00357317
270.2	0.00290281		800.19	0.01352108		1330.19	0.01446213		1860.19	0.00358675		2390.18	0.00582164		2920.18	-0.00011473		3450.17	0.00563785		3980.17	-0.00379594
270.4	0.00198844		800.39	0.01382226		1330.39	0.01379076		1860.39	0.00365855		2390.38	0.00578877		2920.38	-0.00019322		3450.37	0.00562295		3980.37	-0.00311572
270.6	0.00218516		800.59	0.01294193		1330.59	0.01314496		1860.59	0.00346264		2390.58	0.00615163		2920.58	-0.00039426		3450.57	0.00534057		3980.57	-0.00351249
270.8	0.0019479		800.79	0.01232364		1330.79	0.01317565		1860.79	0.00195335		2390.78	0.0077676		2920.78	-0.00019529		3450.77	0.00572819		3980.77	-0.00414995
271	0.00180209		800.99	0.01346163		1330.99	0.01337302		1860.99	0.00147207		2390.98	0.00856247		2920.98	-0.00067706		3450.97	0.00549321		3980.97	-0.00432407
271.2	0.00103806		801.19	0.01369308		1331.19	0.01360659		1861.19	0.00076526		2391.18	0.00874253		2921.18	0.00016501		3451.17	0.00555543		3981.17	-0.00504013
271.4	0.00049172		801.39	0.01300396		1331.39	0.01334413		1861.39	0.00119278		2391.38	0.00873179		2921.38	-0.00003391		3451.37	0.00546428		3981.37	-0.00537411
271.6	0.00132635		801.59	0.01227891		1331.59	0.01280312		1861.59	0.00191634		2391.58	0.00872243		2921.58	0.00025618		3451.57	0.00646613		3981.57	-0.00444857
271.8	0.00235443		801.79	0.01335026		1331.79	0.01279277		1861.79	0.0032194		2391.78	0.00798275		2921.78	0.00124964		3451.77	0.00674026		3981.77	-0.00441106
272	0.00273902		801.99	0.01363382		1331.99	0.01191153		1861.99	0.00330672		2391.98	0.00719333		2921.98	0.00180924		3451.97	0.0069599		3981.97	-0.005246
272.2	0.00299062		802.19	0.01406013		1332.19	0.01183519		1862.19	0.00334885		2392.18	0.00662959		2922.18	0.00184623		3452.17	0.00602587		3982.17	-0.00562964
272.4	0.00338526		802.39	0.01345406		1332.39	0.01274012		1862.39	0.00432024		2392.38	0.00592735		2922.38	0.00255881		3452.37	0.00644566		3982.37	-0.00619399
272.6	0.00332139		802.59	0.01314905		1332.59	0.01295971		1862.59	0.00361728		2392.58	0.00522726		2922.58	0.00314644		3452.57	0.00592594		3982.57	-0.006725
272.8	0.00281097		802.79	0.01369612		1332.79	0.0130083		1862.79	0.00354203		2392.78	0.00423988		2922.78	0.00343826		3452.77	0.00546617		3982.77	-0.00787969
273	0.0024406		802.99	0.01450663		1332.99	0.01308389		1862.99	0.00463543		2392.98	0.00369998		2922.98	0.00390895		3452.97	0.00589864		3982.97	-0.00741091
273.2	0.00326715		803.19	0.01529189		1333.19	0.01348791		1863.19	0.00481297		2393.18	0.00296128		2923.18	0.00474653		3453.17	0.00519328		3983.17	-0.00777499
273.4	0.00278065		803.39	0.01452964		1333.39	0.01387025		1863.39	0.00546748		2393.38	0.0029695		2923.38	0.00480762		3453.37	0.00507146		3983.37	-0.00774324
273.6	0.00356713		803.59	0.014186		1333.59	0.0138385		1863.59	0.0052722		2393.58	0.00271007		2923.58	0.00530227		3453.57	0.00521385		3983.57	-0.00756512
273.8	0.00354298		803.79	0.01493588		1333.79	0.01404942		1863.79	0.00477096		2393.78	0.00303828		2923.78	0.00478831		3453.77	0.00553394		3983.77	-0.00772555
274	0.00370178		803.99	0.01466709		1333.99	0.01515952		1863.99	0.00488383		2393.98	0.00368779		2923.98	0.0046558		3453.97	0.00501765		3983.97	-0.00731419
274.2	0.00327054		804.19	0.01441595		1334.19	0.01532206		1864.19	0.00542765		2394.18	0.00357042		2924.18	0.00521499		3454.17	0.00541701		3984.17	-0.00724984
274.4	0.00347931		804.39	0.01465034		1334.39	0.01471927		1864.39	0.0055971		2394.38	0.0033638		2924.38	0.00548731		3454.37	0.00581831		3984.37	-0.00695559
274.6	0.0040671		804.59	0.01515683		1334.59	0.0150033		1864.59	0.00575421		2394.58	0.00407395		2924.58	0.00532015		3454.57	0.00623988		3984.57	-0.00715508
274.8	0.0036954		804.79	0.01491929		1334.79	0.0155912		1864.79	0.0048635		2394.78	0.00458221		2924.78	0.00467193		3454.77	0.00582189		3984.77	-0.0089759
275	0.003617		804.99	0.01548409		1334.99	0.01663039		1864.99	0.00519159		2394.98	0.00478719		2924.98	0.00325118		3454.97	0.00538069		3984.97	-0.00830504
275.2	0.00323457		805.19	0.0147419		1335.19	0.01616092		1865.19	0.00569122		2395.18	0.00498348		2925.18	0.00241283		3455.17	0.0051531		3985.17	-0.00848651
275.4	0.00336567		805.39	0.01419288		1335.39	0.01606254		1865.39	0.00645046		2395.38	0.00564931		2925.38	0.00167202		3455.37	0.0054227		3985.37	-0.00765629
275.6	0.00433848		805.59	0.01561448		1335.59	0.01600654		1865.59	0.00709797		2395.58	0.00611538		2925.58	0.00137978		3455.57	0.00523849		3985.57	-0.00620904
275.8	0.00510413		805.79	0.01639533		1335.79	0.01665887		1865.79	0.00796983		2395.78	0.00609751		2925.78	0.00089229		3455.77	0.00475441		3985.77	-0.00708518
276	0.00481703		805.99	0.01624407		1335.99	0.01652298		1865.99	0.00750424		2395.98	0.00533551		2925.98	0.000593		3455.97	0.00382151		3985.97	-0.00661472
276.2	0.00458399		806.19	0.01549348		1336.19	0.01642335		1866.19	0.00737542		2396.18	0.00542447		2926.18	0.00037743		3456.17	0.00362211		3986.17	-0.00619427
276.4	0.00430315		806.39	0.01496554		1336.39	0.01756432		1866.39	0.00783134		2396.38	0.00558148		2926.38	0.00032576		3456.37	0.00323966		3986.37	-0.00559444
276.6	0.00412452		806.59	0.01486281		1336.59	0.01640638		1866.59	0.00681993		2396.58	0.00508742		2926.58	0.0003541		3456.57	0.0024164		3986.57	-0.00441401
276.8	0.00354871		806.79	0.0142579		1336.79	0.01545908		1866.79	0.00657261		2396.78	0.00467017		2926.78	0.00141607		3456.77	0.00240447		3986.77	-0.00493108
277	0.00348461		806.99	0.01362008		1336.99	0.01481791		1866.99	0.00650589		2396.98	0.00574728		2926.98	0.00154794		3456.97	0.00275227		3986.97	-0.00398478
277.2	0.00375381		807.19	0.01193953		1337.19	0.01387361		1867.19	0.00528176		2397.18	0.00561254		2927.18	0.00305164		3457.17	0.00282098		3987.17	-0.00332473
277.4	0.00285178		807.39	0.01063978		1337.39	0.01329554		1867.39	0.00403713		2397.38	0.00600108		2927.38	0.0035356		3457.37	0.00325756		3987.37	-0.00294932
277.6	0.00255185		807.59	0.01038749		1337.59	0.01261662		1867.59	0.00333621		2397.58	0.00542218		2927.58	0.00339758		3457.57	0.00430789		3987.57	-0.00267155
277.8	0.00229576		807.79	0.01060642		1337.79	0.0125221		1867.79	0.00273954		2397.78	0.00588258		2927.78	0.00264892		3457.77	0.00440674		3987.77	-0.00268347
278	0.00201901		807.99	0.0105721		1337.99	0.01286039		1867.99	0.00246102		2397.98	0.00512062		2927.98	0.00376151		3457.97	0.0051157		3987.97	-0.00272773
278.2	0.00164377		808.19	0.01065029		1338.19	0.01246818		1868.19	0.00241733		2398.18	0.0045364		2928.18	0.00424598		3458.17	0.00583184		3988.17	-0.00286649
278.4	0.00154587		808.39	0.01148922		1338.39	0.01236532		1868.39	0.00215691		2398.38	0.00355071		2928.38	0.00482676		3458.37	0.00578538		3988.37	-0.0038959
278.6	0.00207047		808.59	0.01196395		1338.59	0.01235166		1868.59	0.00268669		2398.58	0.00445146		2928.58	0.0039696		3458.57	0.00578763		3988.57	-0.0045476
278.8	0.00138116		808.79	0.01254783		1338.79	0.01204307		1868.79	0.00211197		2398.78	0.00418339		2928.78	0.00309902		3458.77	0.00551891		3988.77	-0.00541788
279	0.00167677		808.99	0.01298211		1338.99	0.01215843		1868.99	0.00231982		2398.98	0.00467876		2928.98	0.00217775		3458.97	0.00562015		3988.97	-0.00556251
279.2	0.00228115		809.19	0.01398578		1339.19	0.01143897		1869.19	0.00322503		2399.18	0.00490546		2929.18	0.00195847		3459.17	0.00512301		3989.17	-0.00638184
279.4	0.00232825		809.39	0.01501793		1339.39	0.01156017		1869.39	0.00367045		2399.38	0.00443412		2929.38	0.00293063		3459.37	0.00508426		3989.37	-0.00620636
279.6	0.00310585		809.59	0.01603865		1339.59	0.01235288		1869.59	0.00468656		2399.58	0.00394304		2929.58	0.00290206		3459.57	0.00432518		3989.57	-0.00729907
279.8	0.00352096		809.79	0.01613752		1339.79	0.01240358		1869.79	0.00462218		2399.78	0.00363923		2929.78	0.0037783		3459.77	0.00348624		3989.77	-0.00780195
280	0.00358846		809.99	0.01618785		1339.99	0.01221135		1869.99	0.00527777		2399.98	0.00349871		2929.98	0.00456118		3459.97	0.00287672		3989.97	-0.00717199
280.2	0.00430071		810.19	0.0163212		1340.19	0.01277751		1870.19	0.00590715		2400.18	0.00392375		2930.18	0.00577002		3460.17	0.00300241		3990.17	-0.00719543
280.4	0.00403673		810.39	0.01596689		1340.39	0.01304065		1870.39	0.00673184		2400.38	0.00353282		2930.38	0.00567671		3460.37	0.0023101		3990.37	-0.00621197
280.6	0.00444343		810.59	0.01564784		1340.59	0.01285497		1870.59	0.00618459		2400.58	0.00287658		2930.58	0.00593435		3460.57	0.00195744		3990.57	-0.00520904
280.8	0.0041767		810.79	0.01489851		1340.79	0.01165846		1870.79	0.00588338		2400.78	0.00299826		2930.78	0.00530488		3460.77	0.00292086		3990.77	-0.00594678
281	0.00409242		810.99	0.01498129		1340.99	0.01143305		1870.99	0.00595474		2400.98	0.00362465		2930.98	0.00571642		3460.97	0.00303194		3990.97	-0.00493658
281.2	0.00392267		811.19	0.01456641		1341.19	0.01201424		1871.19	0.00525475		2401.18	0.00394668		2931.18	0.00672004		3461.17	0.00335108		3991.17	-0.00478399
281.4	0.00391238		811.39	0.01453845		1341.39	0.01205086		1871.39	0.00487156		2401.38	0.00362654		2931.38	0.00669059		3461.37	0.00405154		3991.37	-0.00507709
281.6	0.00378048		811.59	0.01389087		1341.59	0.01200841		1871.59	0.00612002		2401.58	0.00354828		2931.58	0.00567545		3461.57	0.00429072		3991.57	-0.00444412
281.8	0.00390231		811.79	0.01385893		1341.79	0.01252206		1871.79	0.00626792		2401.78	0.00441161		2931.78	0.0056777		3461.77	0.00462577		3991.77	-0.00384691
282	0.00292762		811.99	0.01421325		1341.99	0.01324005		1871.99	0.00594294		2401.98	0.00424793		2931.98	0.00633852		3461.97	0.00525482		3991.97	-0.00382974
282.2	0.00279536		812.19	0.01366534		1342.19	0.01313323		1872.19	0.0063229		2402.18	0.00449874		2932.18	0.00612215		3462.17	0.00574333		3992.17	-0.00417984
282.4	0.00282179		812.39	0.01410086		1342.39	0.013575		1872.39	0.00679463		2402.38	0.00462755		2932.38	0.00604562		3462.37	0.00599419		3992.37	-0.00394951
282.6	0.00250535		812.59	0.01375534		1342.59	0.0135887		1872.59	0.00689889		2402.58	0.00512647		2932.58	0.00513028		3462.57	0.00672352		3992.57	-0.00369721
282.8	0.00234712		812.79	0.01395818		1342.79	0.0127209		1872.79	0.00717193		2402.78	0.00449949		2932.78	0.00426817		3462.77	0.00664012		3992.77	-0.00385661
283	0.00261726		812.99	0.01321402		1342.99	0.0131282		1872.99	0.00692385		2402.98	0.00454056		2932.98	0.00439668		3462.97	0.00644489		3992.97	-0.00505991
283.2	0.00271487		813.19	0.01269548		1343.19	0.01310324		1873.19	0.00633328		2403.18	0.00496892		2933.18	0.00498459		3463.17	0.00604972		3993.17	-0.00461768
283.4	0.00235302		813.39	0.01176242		1343.39	0.0121472		1873.39	0.00570777		2403.38	0.00496589		2933.38	0.00484687		3463.37	0.0056371		3993.37	-0.00475389
283.6	0.00340796		813.59	0.01131802		1343.59	0.01263988		1873.59	0.00511031		2403.58	0.00515349		2933.58	0.00481473		3463.57	0.00515727		3993.57	-0.0052309
283.8	0.00330751		813.79	0.01103022		1343.79	0.01184404		1873.79	0.00413848		2403.78	0.0059586		2933.78	0.00576152		3463.77	0.0044228		3993.77	-0.00448473
284	0.00321407		813.99	0.01122468		1343.99	0.01200397		1873.99	0.00544898		2403.98	0.00669913		2933.98	0.00516746		3463.97	0.00424587		3993.97	-0.00422696
284.2	0.00320525		814.19	0.01131563		1344.19	0.01251011		1874.19	0.00537638		2404.18	0.00622178		2934.18	0.00525367		3464.17	0.00371765		3994.17	-0.00405394
284.4	0.00251724		814.39	0.0114324		1344.39	0.01184848		1874.39	0.00518597		2404.38	0.00520023		2934.38	0.00446186		3464.37	0.00297626		3994.37	-0.00349978
284.6	0.00324748		814.59	0.01170707		1344.59	0.01165934		1874.59	0.00452335		2404.58	0.00576584		2934.58	0.0046934		3464.57	0.00282909		3994.57	-0.00365084
284.8	0.00243898		814.79	0.01284534		1344.79	0.01067579		1874.79	0.0043946		2404.78	0.00550225		2934.78	0.00427303		3464.77	0.00364793		3994.77	-0.00451725
285	0.00244994		814.99	0.01286415		1344.99	0.01156629		1874.99	0.00473072		2404.98	0.00523699		2934.98	0.00548393		3464.97	0.00276482		3994.97	-0.00439258
285.2	0.00246304		815.19	0.01302764		1345.19	0.01211657		1875.19	0.00451997		2405.18	0.0051567		2935.18	0.00631993		3465.17	0.00266723		3995.17	-0.0046764
285.4	0.00260415		815.39	0.01286702		1345.39	0.01150134		1875.39	0.00428912		2405.38	0.00482214		2935.38	0.00612912		3465.37	0.00223161		3995.37	-0.00537023
285.6	0.00248744		815.59	0.01282657		1345.59	0.01186242		1875.59	0.00457146		2405.58	0.00517081		2935.58	0.00613904		3465.57	0.00184562		3995.57	-0.00552072
285.8	0.00183654		815.79	0.0133484		1345.79	0.01211309		1875.79	0.00421549		2405.78	0.00569822		2935.78	0.0060862		3465.77	0.00273117		3995.77	-0.00570814
286	0.00139634		815.99	0.01442399		1345.99	0.01291417		1875.99	0.00447497		2405.98	0.00456658		2935.98	0.00608106		3465.97	0.00226295		3995.97	-0.00627144
286.2	0.00136197		816.19	0.01434167		1346.19	0.01304655		1876.19	0.00503572		2406.18	0.00432228		2936.18	0.00536748		3466.17	0.00194807		3996.17	-0.00742568
286.4	0.00174991		816.39	0.01528987		1346.39	0.01480054		1876.39	0.00509106		2406.38	0.00390854		2936.38	0.00471189		3466.37	0.00229919		3996.37	-0.00735745
286.6	0.00267482		816.59	0.01522392		1346.59	0.0148637		1876.59	0.00458554		2406.58	0.00421258		2936.58	0.00447694		3466.57	0.00336375		3996.57	-0.00739112
286.8	0.00351623		816.79	0.01542993		1346.79	0.01457624		1876.79	0.00486761		2406.78	0.00498096		2936.78	0.00487983		3466.77	0.00389515		3996.77	-0.00794993
287	0.0033458		816.99	0.01545964		1346.99	0.0149949		1876.99	0.00406799		2406.98	0.00519022		2936.98	0.00446007		3466.97	0.00484975		3996.97	-0.0089948
287.2	0.00430318		817.19	0.01465011		1347.19	0.01532758		1877.19	0.00262956		2407.18	0.006006		2937.18	0.00379679		3467.17	0.00507261		3997.17	-0.00831755
287.4	0.00489457		817.39	0.01482052		1347.39	0.01472675		1877.39	0.00273327		2407.38	0.00651516		2937.38	0.00270692		3467.37	0.00566621		3997.37	-0.00880483
287.6	0.00593131		817.59	0.01398123		1347.59	0.01490214		1877.59	0.00240418		2407.58	0.00746668		2937.58	0.00343578		3467.57	0.00587443		3997.57	-0.00815956
287.8	0.00582874		817.79	0.01336749		1347.79	0.01418935		1877.79	0.00235114		2407.78	0.00780977		2937.78	0.00367811		3467.77	0.00595079		3997.77	-0.00804648
288	0.0061381		817.99	0.01286078		1347.99	0.014558		1877.99	0.00345791		2407.98	0.00810388		2937.98	0.00318844		3467.97	0.00629849		3997.97	-0.0071923
288.2	0.00602577		818.19	0.012867		1348.19	0.01471495		1878.19	0.00320993		2408.18	0.00825933		2938.18	0.00374302		3468.17	0.00638009		3998.17	-0.00686694
288.4	0.00582891		818.39	0.01334918		1348.39	0.01426207		1878.39	0.00330602		2408.38	0.00807538		2938.38	0.00420944		3468.37	0.00686591		3998.37	-0.00765687
288.6	0.00681547		818.59	0.01247807		1348.59	0.01478749		1878.59	0.0038435		2408.58	0.00866912		2938.58	0.00449392		3468.57	0.00720574		3998.57	-0.0073343
288.8	0.00628157		818.79	0.01319264		1348.79	0.01499353		1878.79	0.00453298		2408.78	0.00784275		2938.78	0.00429337		3468.77	0.00753912		3998.77	-0.00682412
289	0.00652037		818.99	0.01152925		1348.99	0.01489927		1878.99	0.00501698		2408.98	0.00735754		2938.98	0.00462908		3468.97	0.00722531		3998.97	-0.0067501
289.2	0.00664458		819.19	0.0114916		1349.19	0.01444259		1879.19	0.00581721		2409.18	0.00703939		2939.18	0.00466294		3469.17	0.00764068		3999.17	-0.00653334
289.4	0.00668937		819.39	0.01099492		1349.39	0.01432037		1879.39	0.00548938		2409.38	0.00757309		2939.38	0.00437846		3469.37	0.00679839		3999.37	-0.00684602
289.6	0.00665658		819.59	0.0111008		1349.59	0.01444084		1879.59	0.00598331		2409.58	0.00737929		2939.58	0.00435987		3469.57	0.00712217		3999.57	-0.00621225
289.8	0.00623499		819.79	0.01167369		1349.79	0.01460746		1879.79	0.00687154		2409.78	0.00750954		2939.78	0.00252994		3469.77	0.00736781		3999.77	-0.00535812
290	0.00551932		819.99	0.01289391		1349.99	0.01462449		1879.99	0.00685243		2409.98	0.00687596		2939.98	0.00218225		3469.97	0.00607216		3999.97	-0.00589592
290.2	0.00443661		820.19	0.01361747		1350.19	0.01448225		1880.19	0.00644407		2410.18	0.00641651		2940.18	0.00144923		3470.17	0.00600898		4000.17	-0.00551239
290.4	0.00417407		820.39	0.01455004		1350.39	0.01544034		1880.39	0.0058639		2410.38	0.00551925		2940.38	0.00135466		3470.37	0.00637246		4000.37	-0.00406619
290.6	0.00371741		820.59	0.01543971		1350.59	0.0155056		1880.59	0.00632989		2410.58	0.00533152		2940.58	0.00191981		3470.57	0.00712547		4000.57	-0.00345211
290.8	0.00313533		820.79	0.01624708		1350.79	0.01521302		1880.79	0.00601508		2410.78	0.00529883		2940.78	0.00232209		3470.77	0.00792005		4000.77	-0.00354493
291	0.00247581		820.99	0.01634922		1350.99	0.01550544		1880.99	0.00541143		2410.98	0.00438172		2940.98	0.00158369		3470.97	0.00795664		4000.97	-0.0039679
291.2	0.0025559		821.19	0.01613026		1351.19	0.01538133		1881.19	0.00449994		2411.18	0.00476984		2941.18	0.0022115		3471.17	0.00788991		4001.17	-0.00302282
291.4	0.00223493		821.39	0.01599553		1351.39	0.01443535		1881.39	0.00429088		2411.38	0.00440095		2941.38	0.00312471		3471.37	0.00756259		4001.37	-0.00377008
291.6	0.00314653		821.59	0.01507887		1351.59	0.01301766		1881.59	0.0040286		2411.58	0.00473987		2941.58	0.0042191		3471.57	0.0068708		4001.57	-0.00306068
291.8	0.00264715		821.79	0.01509102		1351.79	0.01237596		1881.79	0.00438919		2411.78	0.00451291		2941.78	0.00513274		3471.77	0.00632524		4001.77	-0.00351498
292	0.00268493		821.99	0.01593056		1351.99	0.01264165		1881.99	0.00491343		2411.98	0.00530989		2941.98	0.0058393		3471.97	0.00598675		4001.97	-0.00309582
292.2	0.0026967		822.19	0.01625479		1352.19	0.01361369		1882.19	0.00468478		2412.18	0.00605806		2942.18	0.00617719		3472.17	0.00541059		4002.17	-0.00412528
292.4	0.00226145		822.39	0.01598243		1352.39	0.0139075		1882.39	0.00512299		2412.38	0.00643246		2942.38	0.00669324		3472.37	0.00596544		4002.37	-0.00512832
292.6	0.00382816		822.59	0.01430351		1352.59	0.01439456		1882.59	0.00501376		2412.58	0.00718023		2942.58	0.00645931		3472.57	0.00619485		4002.57	-0.00425445
292.8	0.00366148		822.79	0.01366252		1352.79	0.01412434		1882.79	0.00507467		2412.78	0.00666932		2942.78	0.00651752		3472.77	0.00660678		4002.77	-0.00467364
293	0.00344212		822.99	0.01266254		1352.99	0.01365965		1882.99	0.00536618		2412.98	0.00601684		2942.98	0.00626959		3472.97	0.00704375		4002.97	-0.00474
293.2	0.00382405		823.19	0.01248762		1353.19	0.01388045		1883.19	0.00622657		2413.18	0.00673828		2943.18	0.0058417		3473.17	0.00701834		4003.17	-0.00409195
293.4	0.00378676		823.39	0.01230711		1353.39	0.01457112		1883.39	0.00668144		2413.38	0.0068822		2943.38	0.00641243		3473.37	0.00625847		4003.37	-0.00425955
293.6	0.00352343		823.59	0.0118158		1353.59	0.0136845		1883.59	0.00740048		2413.58	0.00716927		2943.58	0.00577187		3473.57	0.00646194		4003.57	-0.0043098
293.8	0.00279083		823.79	0.01165033		1353.79	0.01362416		1883.79	0.00739467		2413.78	0.00773977		2943.78	0.00465201		3473.77	0.00708769		4003.77	-0.00419182
294	0.00236652		823.99	0.01213851		1353.99	0.01367598		1883.99	0.00640629		2413.98	0.00730878		2943.98	0.00490629		3473.97	0.00712907		4003.97	-0.00418491
294.2	0.00204264		824.19	0.01190056		1354.19	0.0142046		1884.19	0.00615962		2414.18	0.00658564		2944.18	0.00472534		3474.17	0.00856803		4004.17	-0.00359059
294.4	0.00176426		824.39	0.01234671		1354.39	0.0146431		1884.39	0.00655883		2414.38	0.00606014		2944.38	0.00450833		3474.37	0.00968824		4004.37	-0.00315565
294.6	0.00179972		824.59	0.01294734		1354.59	0.01565555		1884.59	0.00746015		2414.58	0.00530417		2944.58	0.00446673		3474.57	0.01045932		4004.57	-0.00315159
294.8	0.00218923		824.79	0.01344574		1354.79	0.01451467		1884.79	0.00644741		2414.78	0.00475304		2944.78	0.00375612		3474.77	0.01106727		4004.77	-0.00355762
295	0.00252973		824.99	0.0137853		1354.99	0.01401349		1884.99	0.00656073		2414.98	0.00432877		2944.98	0.00346184		3474.97	0.01113376		4004.97	-0.00399097
295.2	0.00298108		825.19	0.01472432		1355.19	0.01351722		1885.19	0.00610308		2415.18	0.00476973		2945.18	0.00356921		3475.17	0.01124927		4005.17	-0.00421587
295.4	0.00339255		825.39	0.0153099		1355.39	0.01281072		1885.39	0.0062134		2415.38	0.00465844		2945.38	0.00333854		3475.37	0.01081066		4005.37	-0.00509282
295.6	0.00419434		825.59	0.01563951		1355.59	0.01185507		1885.59	0.0070306		2415.58	0.00528222		2945.58	0.0034399		3475.57	0.01046551		4005.57	-0.00464553
295.8	0.00461735		825.79	0.01628787		1355.79	0.01219356		1885.79	0.00715165		2415.78	0.00561064		2945.78	0.00429901		3475.77	0.01010186		4005.77	-0.00525672
296	0.00512717		825.99	0.01687645		1355.99	0.0123288		1885.99	0.00719467		2415.98	0.00663015		2945.98	0.00435072		3475.97	0.01027629		4005.97	-0.00508645
296.2	0.00513799		826.19	0.01643737		1356.19	0.0128697		1886.19	0.00731427		2416.18	0.00651981		2946.18	0.00453877		3476.17	0.01021648		4006.17	-0.00552558
296.4	0.00564922		826.39	0.01616783		1356.39	0.01262682		1886.39	0.00756202		2416.38	0.00632262		2946.38	0.00451542		3476.37	0.00978432		4006.37	-0.00475195
296.6	0.00602676		826.59	0.01488811		1356.59	0.0125398		1886.59	0.00705318		2416.58	0.00635169		2946.58	0.00483761		3476.57	0.00867085		4006.57	-0.00438627
296.8	0.0058432		826.79	0.01492451		1356.79	0.01240882		1886.79	0.00693274		2416.78	0.00546967		2946.78	0.00521861		3476.77	0.00800421		4006.77	-0.00394525
297	0.00611555		826.99	0.01536216		1356.99	0.01269443		1886.99	0.00705459		2416.98	0.00550667		2946.98	0.00492589		3476.97	0.00797915		4006.97	-0.00409557
297.2	0.00641779		827.19	0.01439397		1357.19	0.01235146		1887.19	0.00792087		2417.18	0.00632526		2947.18	0.00520253		3477.17	0.0073253		4007.17	-0.00370211
297.4	0.00646519		827.39	0.01391352		1357.39	0.01238111		1887.39	0.00762339		2417.38	0.00647884		2947.38	0.00571042		3477.37	0.00620715		4007.37	-0.00311776
297.6	0.00666267		827.59	0.01367767		1357.59	0.0127107		1887.59	0.00770813		2417.58	0.00672364		2947.58	0.00440342		3477.57	0.00634663		4007.57	-0.00255277
297.8	0.00628		827.79	0.01342672		1357.79	0.01400748		1887.79	0.00768094		2417.78	0.0071099		2947.78	0.00416663		3477.77	0.00637992		4007.77	-0.00155697
298	0.00608403		827.99	0.01309878		1357.99	0.01474233		1887.99	0.00804548		2417.98	0.00652906		2947.98	0.00406558		3477.97	0.00673005		4007.97	-0.00063744
298.2	0.0047317		828.19	0.01205814		1358.19	0.01517785		1888.19	0.00849206		2418.18	0.00618112		2948.18	0.00384865		3478.17	0.00724369		4008.17	-0.00037218
298.4	0.00433131		828.39	0.01283257		1358.39	0.01543049		1888.39	0.00876917		2418.38	0.00556435		2948.38	0.00343732		3478.37	0.00726011		4008.37	0.00084247
298.6	0.00400201		828.59	0.01289917		1358.59	0.01663375		1888.59	0.00852881		2418.58	0.00480565		2948.58	0.00250337		3478.57	0.00702949		4008.57	0.00119699
298.8	0.00378393		828.79	0.01296338		1358.79	0.01659659		1888.79	0.00788587		2418.78	0.00421617		2948.78	0.0022799		3478.77	0.00704445		4008.77	0.00063266
299	0.00397949		828.99	0.01285568		1358.99	0.01735309		1888.99	0.00773498		2418.98	0.00433592		2948.98	0.00184932		3478.97	0.00683898		4008.97	0.00096255
299.2	0.00314143		829.19	0.01283891		1359.19	0.01696725		1889.19	0.0063999		2419.18	0.00470316		2949.18	0.00179388		3479.17	0.00716052		4009.17	0.00006758
299.4	0.00259457		829.39	0.01258836		1359.39	0.01610468		1889.39	0.00725582		2419.38	0.00411245		2949.38	0.00192612		3479.37	0.00722066		4009.37	-0.00112847
299.6	0.00237899		829.59	0.01232367		1359.59	0.01612679		1889.59	0.0063412		2419.58	0.00451104		2949.58	0.00256099		3479.57	0.00699475		4009.57	-0.00185978
299.8	0.00234889		829.79	0.01251646		1359.79	0.01642227		1889.79	0.00618758		2419.78	0.00375973		2949.78	0.00300328		3479.77	0.00688361		4009.77	-0.00296021
300	0.0019932		829.99	0.01246938		1359.99	0.01648371		1889.99	0.00647361		2419.98	0.00423919		2949.98	0.00337016		3479.97	0.00671565		4009.97	-0.00287408
300.2	0.00204708		830.19	0.01281238		1360.19	0.01709176		1890.19	0.00568113		2420.18	0.00381698		2950.18	0.00405404		3480.17	0.00607077		4010.17	-0.00293811
300.4	0.00237831		830.39	0.01271671		1360.39	0.01701259		1890.39	0.00538333		2420.38	0.00486745		2950.38	0.00499181		3480.37	0.00588811		4010.37	-0.00351174
300.6	0.00262424		830.59	0.01283737		1360.59	0.0159925		1890.59	0.00451418		2420.58	0.00578854		2950.58	0.00568825		3480.57	0.00575038		4010.57	-0.00440969
300.8	0.00368479		830.79	0.01350062		1360.79	0.01543196		1890.79	0.00392671		2420.78	0.00674583		2950.78	0.00662629		3480.77	0.00602599		4010.77	-0.00435944
301	0.00424921		830.99	0.0137866		1360.99	0.01491851		1890.99	0.00442397		2420.98	0.0074153		2950.98	0.00632562		3480.97	0.00710452		4010.97	-0.00508957
301.2	0.00388918		831.19	0.01381414		1361.19	0.01424341		1891.19	0.00460693		2421.18	0.00792586		2951.18	0.00623401		3481.17	0.00711177		4011.17	-0.00494381
301.4	0.0043014		831.39	0.01391853		1361.39	0.01422543		1891.39	0.00386058		2421.38	0.008626		2951.38	0.00580254		3481.37	0.00677987		4011.37	-0.00408287
301.6	0.00436355		831.59	0.01372142		1361.59	0.01440884		1891.59	0.00488466		2421.58	0.00806282		2951.58	0.00557034		3481.57	0.0071824		4011.57	-0.00318661
301.8	0.00430769		831.79	0.0136333		1361.79	0.01372762		1891.79	0.00574377		2421.78	0.0089083		2951.78	0.00591523		3481.77	0.00685987		4011.77	-0.00220783
302	0.0047303		831.99	0.01428427		1361.99	0.01315092		1891.99	0.00668271		2421.98	0.00881409		2951.98	0.00539458		3481.97	0.00796824		4011.97	-0.00126585
302.2	0.00531062		832.19	0.01373509		1362.19	0.01265074		1892.19	0.00734805		2422.18	0.00859418		2952.18	0.0047816		3482.17	0.00765798		4012.17	-0.00087517
302.4	0.00598996		832.39	0.01477368		1362.39	0.01277597		1892.39	0.00832408		2422.38	0.00878127		2952.38	0.00343357		3482.37	0.00822408		4012.37	-0.00024713
302.6	0.00512398		832.59	0.01503073		1362.59	0.0129773		1892.59	0.00840437		2422.58	0.00828611		2952.58	0.00229265		3482.57	0.00908796		4012.57	-0.0000767
302.8	0.00505444		832.79	0.0149739		1362.79	0.01267825		1892.79	0.00835477		2422.78	0.00764753		2952.78	0.00246768		3482.77	0.00965911		4012.77	0.00019889
303	0.00440863		832.99	0.01540707		1362.99	0.0126395		1892.99	0.00845741		2422.98	0.00649363		2952.98	0.00182748		3482.97	0.0102277		4012.97	0.00090787
303.2	0.00377843		833.19	0.01519221		1363.19	0.01157195		1893.19	0.00833179		2423.18	0.00654252		2953.18	0.0019564		3483.17	0.01060899		4013.17	0.00050609
303.4	0.00394017		833.39	0.01562166		1363.39	0.01242574		1893.39	0.0088868		2423.38	0.00623464		2953.38	0.00094849		3483.37	0.01004159		4013.37	0.00063604
303.6	0.00366891		833.59	0.01601381		1363.59	0.01300445		1893.59	0.00793184		2423.58	0.00598182		2953.58	0.00077469		3483.57	0.00951361		4013.57	0.00099561
303.8	0.00411303		833.79	0.01600629		1363.79	0.01367871		1893.79	0.00854749		2423.78	0.0049767		2953.78	0.00086106		3483.77	0.0091824		4013.77	0.00057107
304	0.00452403		833.99	0.0160299		1363.99	0.01360038		1893.99	0.00817874		2423.98	0.00611547		2953.98	0.00123367		3483.97	0.00851662		4013.97	0.00097169
304.2	0.00413206		834.19	0.0159201		1364.19	0.01357377		1894.19	0.00701446		2424.18	0.00572589		2954.18	0.00150943		3484.17	0.00793865		4014.17	0.00038771
304.4	0.00347299		834.39	0.01582544		1364.39	0.01345217		1894.39	0.00743102		2424.38	0.00661639		2954.38	0.00283033		3484.37	0.00783736		4014.37	-0.0005231
304.6	0.00347092		834.59	0.01484289		1364.59	0.01315603		1894.59	0.00718323		2424.58	0.00670915		2954.58	0.00276568		3484.57	0.00760829		4014.57	-0.0006052
304.8	0.00323093		834.79	0.01469678		1364.79	0.01299636		1894.79	0.00758779		2424.78	0.00749902		2954.78	0.00405203		3484.77	0.00756159		4014.77	-0.00074592
305	0.00226873		834.99	0.01429041		1364.99	0.01313302		1894.99	0.00745107		2424.98	0.00743951		2954.98	0.00422028		3484.97	0.00859976		4014.97	-0.00135301
305.2	0.00166035		835.19	0.01300203		1365.19	0.01385688		1895.19	0.00707571		2425.18	0.00774038		2955.18	0.00452892		3485.17	0.0083236		4015.17	-0.0020313
305.4	0.00209528		835.39	0.01333641		1365.39	0.01376369		1895.39	0.0071037		2425.38	0.00814314		2955.38	0.00511657		3485.37	0.00853214		4015.37	-0.00172522
305.6	0.00211738		835.59	0.01331063		1365.59	0.01367784		1895.59	0.00827882		2425.58	0.00834706		2955.58	0.00498529		3485.57	0.00828517		4015.57	-0.001019
305.8	0.00243761		835.79	0.01397766		1365.79	0.0138616		1895.79	0.00882679		2425.78	0.0086841		2955.78	0.00503463		3485.77	0.00815948		4015.77	-0.00086245
306	0.0030056		835.99	0.01373384		1365.99	0.01347018		1895.99	0.00901029		2425.98	0.00864497		2955.98	0.00381456		3485.97	0.00846534		4015.97	-0.00054328
306.2	0.00274437		836.19	0.01372818		1366.19	0.01472114		1896.19	0.00919471		2426.18	0.00833175		2956.18	0.0033883		3486.17	0.00771269		4016.17	-0.00055749
306.4	0.00183499		836.39	0.014565		1366.39	0.01563345		1896.39	0.00839073		2426.38	0.00774269		2956.38	0.0033516		3486.37	0.00854995		4016.37	-0.00076587
306.6	0.00206606		836.59	0.01507796		1366.59	0.01602398		1896.59	0.00739227		2426.58	0.00684874		2956.58	0.00394572		3486.57	0.00864812		4016.57	-0.00043293
306.8	0.00260046		836.79	0.01490296		1366.79	0.0166393		1896.79	0.00658607		2426.78	0.00579508		2956.78	0.00386649		3486.77	0.0085444		4016.77	-0.00005911
307	0.00264163		836.99	0.0152459		1366.99	0.01696795		1896.99	0.00622452		2426.98	0.0053528		2956.98	0.00383139		3486.97	0.00815057		4016.97	-0.00026823
307.2	0.00324424		837.19	0.0154814		1367.19	0.01671832		1897.19	0.00553454		2427.18	0.00617743		2957.18	0.00422113		3487.17	0.00806033		4017.17	-0.00037904
307.4	0.00377097		837.39	0.01548954		1367.39	0.01788182		1897.39	0.00476513		2427.38	0.00588974		2957.38	0.00423347		3487.37	0.00724272		4017.37	-0.00113363
307.6	0.00437245		837.59	0.01588614		1367.59	0.0174852		1897.59	0.00477826		2427.58	0.00444633		2957.58	0.00437717		3487.57	0.00727514		4017.57	-0.00191032
307.8	0.00568962		837.79	0.01570223		1367.79	0.01757901		1897.79	0.00464968		2427.78	0.00402445		2957.78	0.00396535		3487.77	0.00718404		4017.77	-0.00264315
308	0.00542887		837.99	0.01513583		1367.99	0.01670492		1897.99	0.00376159		2427.98	0.00406416		2957.98	0.00414747		3487.97	0.00698294		4017.97	-0.00234247
308.2	0.00467131		838.19	0.01511607		1368.19	0.01605865		1898.19	0.0031837		2428.18	0.00345216		2958.18	0.00490931		3488.17	0.00726425		4018.17	-0.00293909
308.4	0.0044095		838.39	0.01513877		1368.39	0.01634116		1898.39	0.00329729		2428.38	0.00410615		2958.38	0.00539152		3488.37	0.00803732		4018.37	-0.00327585
308.6	0.00484529		838.59	0.01519267		1368.59	0.01524084		1898.59	0.00285901		2428.58	0.00477415		2958.58	0.00509949		3488.57	0.00854788		4018.57	-0.00315257
308.8	0.00448045		838.79	0.01589117		1368.79	0.01432024		1898.79	0.00320404		2428.78	0.0059967		2958.78	0.00549683		3488.77	0.00881814		4018.77	-0.00294753
309	0.00407178		838.99	0.01585495		1368.99	0.01411352		1898.99	0.00279671		2428.98	0.00662886		2958.98	0.00500746		3488.97	0.01010376		4018.97	-0.00273854
309.2	0.00377096		839.19	0.01626279		1369.19	0.01400359		1899.19	0.00308951		2429.18	0.00694284		2959.18	0.00460234		3489.17	0.01022426		4019.17	-0.00250734
309.4	0.00363455		839.39	0.01705586		1369.39	0.01329105		1899.39	0.00404798		2429.38	0.0074527		2959.38	0.00382938		3489.37	0.01078312		4019.37	-0.00143725
309.6	0.00363653		839.59	0.01704383		1369.59	0.0125641		1899.59	0.00532853		2429.58	0.00761304		2959.58	0.00270485		3489.57	0.01065557		4019.57	-0.00077321
309.8	0.0033424		839.79	0.01707396		1369.79	0.01216732		1899.79	0.00505667		2429.78	0.00786323		2959.78	0.00268241		3489.77	0.01032729		4019.77	-0.00042309
310	0.00360278		839.99	0.0167792		1369.99	0.01208397		1899.99	0.00501782		2429.98	0.00853173		2959.98	0.00121293		3489.97	0.01049251		4019.97	0.00025592
310.2	0.00353711		840.19	0.0169417		1370.19	0.01305741		1900.19	0.00412428		2430.18	0.00859039		2960.18	0.00045153		3490.17	0.01052141		4020.17	0.00058555
310.4	0.00377222		840.39	0.01665173		1370.39	0.01280222		1900.39	0.00435927		2430.38	0.00811967		2960.38	-0.00039413		3490.37	0.01016343		4020.37	0.00046395
310.6	0.00451443		840.59	0.01658718		1370.59	0.0126796		1900.59	0.0048996		2430.58	0.00801346		2960.58	-0.00078607		3490.57	0.00967172		4020.57	0.00098518
310.8	0.00414625		840.79	0.01611229		1370.79	0.0120956		1900.79	0.00499006		2430.78	0.00770096		2960.78	-0.00114371		3490.77	0.00963216		4020.77	0.00077056
311	0.00496788		840.99	0.01592454		1370.99	0.01202873		1900.99	0.00571283		2430.98	0.00726826		2960.98	-0.00074527		3490.97	0.00950966		4020.97	-0.00030363
311.2	0.00520045		841.19	0.01551325		1371.19	0.01286886		1901.19	0.00624342		2431.18	0.00723019		2961.18	-0.00035799		3491.17	0.0094954		4021.17	-0.0000486
311.4	0.00574595		841.39	0.01554861		1371.39	0.01436528		1901.39	0.00690096		2431.38	0.00604284		2961.38	-0.00078248		3491.37	0.00938343		4021.37	-0.00026339
311.6	0.00701716		841.59	0.01590176		1371.59	0.01481368		1901.59	0.00811744		2431.58	0.00551871		2961.58	-0.00055187		3491.57	0.01029236		4021.57	-0.00017903
311.8	0.00788132		841.79	0.01539506		1371.79	0.01471528		1901.79	0.00741865		2431.78	0.00526761		2961.78	-0.00071043		3491.77	0.01093172		4021.77	-0.00049796
312	0.00760635		841.99	0.01448836		1371.99	0.01528722		1901.99	0.00627863		2431.98	0.0054488		2961.98	-0.00057878		3491.97	0.01080106		4021.97	-0.00097392
312.2	0.00792852		842.19	0.01492788		1372.19	0.01586268		1902.19	0.00599169		2432.18	0.00501041		2962.18	0.000011		3492.17	0.01092814		4022.17	-0.00206483
312.4	0.00836717		842.39	0.01511641		1372.39	0.01647243		1902.39	0.00491916		2432.38	0.00596341		2962.38	0.00011226		3492.37	0.01115262		4022.37	-0.00227612
312.6	0.00884991		842.59	0.01554008		1372.59	0.01570074		1902.59	0.00412798		2432.58	0.00694089		2962.58	0.00112185		3492.57	0.01089356		4022.57	-0.00259753
312.8	0.00801682		842.79	0.01558175		1372.79	0.01655988		1902.79	0.00455796		2432.78	0.00687909		2962.78	0.00207303		3492.77	0.01075852		4022.77	-0.00208752
313	0.00812417		842.99	0.0156781		1372.99	0.01642688		1902.99	0.00437031		2432.98	0.00717629		2962.98	0.00182748		3492.97	0.01155529		4022.97	-0.0024108
313.2	0.00734148		843.19	0.01593092		1373.19	0.01651071		1903.19	0.0046731		2433.18	0.00712062		2963.18	0.00228136		3493.17	0.01148809		4023.17	-0.00270182
313.4	0.00732382		843.39	0.01534245		1373.39	0.01656368		1903.39	0.00564931		2433.38	0.00760017		2963.38	0.00249852		3493.37	0.01208803		4023.37	-0.00303084
313.6	0.00743466		843.59	0.016337		1373.59	0.01640444		1903.59	0.00624776		2433.58	0.00795841		2963.58	0.00241848		3493.57	0.0117986		4023.57	-0.00367898
313.8	0.00630808		843.79	0.01585161		1373.79	0.0156428		1903.79	0.00600739		2433.78	0.00861919		2963.78	0.00330273		3493.77	0.01137602		4023.77	-0.00387373
314	0.00529333		843.99	0.0150343		1373.99	0.01559486		1903.99	0.00544062		2433.98	0.00901668		2963.98	0.00236894		3493.97	0.01110279		4023.97	-0.0036617
314.2	0.00485855		844.19	0.01435233		1374.19	0.01573451		1904.19	0.00526307		2434.18	0.00955899		2964.18	0.00195587		3494.17	0.01030494		4024.17	-0.00311584
314.4	0.00377769		844.39	0.01468655		1374.39	0.0158628		1904.39	0.00649038		2434.38	0.00973449		2964.38	0.00245322		3494.37	0.00926813		4024.37	-0.00268391
314.6	0.00267833		844.59	0.01456858		1374.59	0.01586524		1904.59	0.00710142		2434.58	0.00961271		2964.58	0.00294216		3494.57	0.00864421		4024.57	-0.00192628
314.8	0.00245037		844.79	0.0144933		1374.79	0.01615662		1904.79	0.00673989		2434.78	0.00996799		2964.78	0.00350991		3494.77	0.00858307		4024.77	-0.00159108
315	0.00367493		844.99	0.0141336		1374.99	0.01646406		1904.99	0.0067983		2434.98	0.00908188		2964.98	0.00372339		3494.97	0.00812933		4024.97	-0.00167884
315.2	0.00356591		845.19	0.01343869		1375.19	0.01646222		1905.19	0.00754929		2435.18	0.00947057		2965.18	0.00423968		3495.17	0.00862339		4025.17	-0.00168949
315.4	0.00382124		845.39	0.01396439		1375.39	0.01712771		1905.39	0.00725315		2435.38	0.00890604		2965.38	0.00475062		3495.37	0.00889989		4025.37	-0.00201908
315.6	0.00487758		845.59	0.01300534		1375.59	0.01700818		1905.59	0.00726592		2435.58	0.00882637		2965.58	0.00584909		3495.57	0.00855583		4025.57	-0.00215343
315.8	0.0055915		845.79	0.01259063		1375.79	0.01742177		1905.79	0.00646488		2435.78	0.00884815		2965.78	0.0046585		3495.77	0.00944631		4025.77	-0.00191144
316	0.0060449		845.99	0.01198064		1375.99	0.01886462		1905.99	0.00638231		2435.98	0.00958108		2965.98	0.0046064		3495.97	0.00925414		4025.97	-0.0019527
316.2	0.00641252		846.19	0.01229117		1376.19	0.01919418		1906.19	0.0060583		2436.18	0.0094575		2966.18	0.00485142		3496.17	0.00941542		4026.17	-0.00210421
316.4	0.00604334		846.39	0.01340238		1376.39	0.01898094		1906.39	0.00524894		2436.38	0.00984587		2966.38	0.00472956		3496.37	0.00948303		4026.37	-0.00191782
316.6	0.00559509		846.59	0.01349489		1376.59	0.01890305		1906.59	0.00564239		2436.58	0.00895738		2966.58	0.00477654		3496.57	0.00929171		4026.57	-0.00129389
316.8	0.00502607		846.79	0.01338596		1376.79	0.01952819		1906.79	0.00614581		2436.78	0.00809662		2966.78	0.00453228		3496.77	0.00936294		4026.77	-0.00068168
317	0.00446371		846.99	0.01397915		1376.99	0.01890991		1906.99	0.00622722		2436.98	0.00835116		2966.98	0.00416449		3496.97	0.01003102		4026.97	-0.00054699
317.2	0.0037821		847.19	0.01441844		1377.19	0.01908543		1907.19	0.00672317		2437.18	0.00840985		2967.18	0.00455075		3497.17	0.01052547		4027.17	-0.00109118
317.4	0.0029226		847.39	0.01489007		1377.39	0.01926445		1907.39	0.0067999		2437.38	0.00795027		2967.38	0.00448795		3497.37	0.01070459		4027.37	-0.00124937
317.6	0.0021434		847.59	0.01546415		1377.59	0.01904393		1907.59	0.00698622		2437.58	0.0086638		2967.58	0.00443049		3497.57	0.01006125		4027.57	-0.00122899
317.8	0.00064224		847.79	0.01460138		1377.79	0.01815499		1907.79	0.00635888		2437.78	0.00879584		2967.78	0.00503146		3497.77	0.00995932		4027.77	-0.00118568
318	-0.000245		847.99	0.01455351		1377.99	0.01808932		1907.99	0.00631113		2437.98	0.00962499		2967.98	0.00374493		3497.97	0.00909725		4027.97	-0.00064596
318.2	-0.00028957		848.19	0.01545524		1378.19	0.0187582		1908.19	0.0067435		2438.18	0.01009449		2968.18	0.00412615		3498.17	0.0090174		4028.17	-0.00012162
318.4	-0.00105236		848.39	0.01617037		1378.39	0.01863649		1908.39	0.00706302		2438.38	0.00940652		2968.38	0.00453721		3498.37	0.00914402		4028.37	-0.00011238
318.6	-0.00016042		848.59	0.01568487		1378.59	0.01896356		1908.59	0.0070908		2438.58	0.0077937		2968.58	0.0040412		3498.57	0.00868144		4028.57	-0.0000052
318.8	0.00033236		848.79	0.01499678		1378.79	0.01866319		1908.79	0.00652837		2438.78	0.00684666		2968.78	0.00392676		3498.77	0.00872287		4028.77	-0.00066374
319	0.00125898		848.99	0.01459545		1378.99	0.01809964		1908.99	0.00688326		2438.98	0.00581995		2968.98	0.00443317		3498.97	0.00918211		4028.97	-0.00270904
319.2	0.00105796		849.19	0.01413126		1379.19	0.0179391		1909.19	0.00801191		2439.18	0.00634879		2969.18	0.00451851		3499.17	0.00936387		4029.17	-0.00336624
319.4	0.00158466		849.39	0.01432117		1379.39	0.01884989		1909.39	0.00701238		2439.38	0.00647664		2969.38	0.00511631		3499.37	0.00876397		4029.37	-0.00306361
319.6	0.00350356		849.59	0.01394098		1379.59	0.0188958		1909.59	0.00828744		2439.58	0.00617785		2969.58	0.00492592		3499.57	0.00811487		4029.57	-0.00280698
319.8	0.00410261		849.79	0.01428057		1379.79	0.01948438		1909.79	0.00853819		2439.78	0.00635392		2969.78	0.00359396		3499.77	0.00908796		4029.77	-0.00283466
320	0.0043583		849.99	0.01463917		1379.99	0.01929157		1909.99	0.00779612		2439.98	0.00674307		2969.98	0.00346975		3499.97	0.00914095		4029.97	-0.00299339
320.2	0.00499278		850.19	0.01450642		1380.19	0.01861206		1910.19	0.00826674		2440.18	0.00648436		2970.18	0.00332028		3500.17	0.00905621		4030.17	-0.00285641
320.4	0.00447963		850.39	0.01502668		1380.39	0.0181687		1910.39	0.00788784		2440.38	0.00577907		2970.38	0.0039611		3500.37	0.00889583		4030.37	-0.00293053
320.6	0.00537768		850.59	0.01477817		1380.59	0.01727623		1910.59	0.00747975		2440.58	0.00618525		2970.58	0.00412985		3500.57	0.00864589		4030.57	-0.00221782
320.8	0.00581943		850.79	0.01431066		1380.79	0.01674385		1910.79	0.00637622		2440.78	0.00699633		2970.78	0.00456384		3500.77	0.00839751		4030.77	-0.00269437
321	0.00521367		850.99	0.01502883		1380.99	0.01693128		1910.99	0.00638123		2440.98	0.00760477		2970.98	0.00527921		3500.97	0.00915346		4030.97	-0.00242107
321.2	0.00513646		851.19	0.01522083		1381.19	0.01687511		1911.19	0.00627763		2441.18	0.00772478		2971.18	0.00524544		3501.17	0.00894064		4031.17	-0.00259931
321.4	0.00448595		851.39	0.01530567		1381.39	0.01567542		1911.39	0.00541084		2441.38	0.0085151		2971.38	0.00519145		3501.37	0.00871312		4031.37	-0.00213456
321.6	0.00450432		851.59	0.01623646		1381.59	0.01515895		1911.59	0.00566416		2441.58	0.00988042		2971.58	0.00569835		3501.57	0.00942148		4031.57	-0.00156055
321.8	0.00377262		851.79	0.01620798		1381.79	0.01448092		1911.79	0.00521233		2441.78	0.00995344		2971.78	0.00501853		3501.77	0.00918183		4031.77	-0.00131989
322	0.00391933		851.99	0.01652655		1381.99	0.01446035		1911.99	0.00584729		2441.98	0.01088511		2971.98	0.00504329		3501.97	0.00864824		4031.97	-0.00116821
322.2	0.0048622		852.19	0.01680118		1382.19	0.01497933		1912.19	0.00612135		2442.18	0.01028293		2972.18	0.00529903		3502.17	0.00907152		4032.17	-0.00109243
322.4	0.00552222		852.39	0.01672029		1382.39	0.01471938		1912.39	0.00636928		2442.38	0.00898604		2972.38	0.0047356		3502.37	0.00888506		4032.37	-0.00115419
322.6	0.006633		852.59	0.016933		1382.59	0.01517271		1912.59	0.00686922		2442.58	0.0085654		2972.58	0.00387901		3502.57	0.00891849		4032.57	-0.00127408
322.8	0.00651318		852.79	0.01646453		1382.79	0.01548593		1912.79	0.00705619		2442.78	0.00835403		2972.78	0.00378244		3502.77	0.00922199		4032.77	-0.00176621
323	0.00753217		852.99	0.0170112		1382.99	0.01580318		1912.99	0.00726199		2442.98	0.00881875		2972.98	0.00364381		3502.97	0.00974615		4032.97	-0.00231881
323.2	0.00791648		853.19	0.01690648		1383.19	0.01619445		1913.19	0.00763576		2443.18	0.00864217		2973.18	0.00328862		3503.17	0.00914764		4033.17	-0.00154667
323.4	0.00885305		853.39	0.01652889		1383.39	0.01689865		1913.39	0.00758326		2443.38	0.0083892		2973.38	0.00435021		3503.37	0.00917325		4033.37	-0.00210991
323.6	0.00944638		853.59	0.01604648		1383.59	0.01690255		1913.59	0.00783945		2443.58	0.00720161		2973.58	0.00417471		3503.57	0.00918236		4033.57	-0.00141195
323.8	0.00942605		853.79	0.01553073		1383.79	0.01717049		1913.79	0.00718729		2443.78	0.00711716		2973.78	0.00383576		3503.77	0.00955222		4033.77	-0.00080086
324	0.00899402		853.99	0.01430673		1383.99	0.01698177		1913.99	0.00707406		2443.98	0.00731443		2973.98	0.0053289		3503.97	0.0098506		4033.97	-0.00025981
324.2	0.00867226		854.19	0.01343092		1384.19	0.01708652		1914.19	0.00764988		2444.18	0.00699692		2974.18	0.00640287		3504.17	0.0089929		4034.17	-0.00093491
324.4	0.00799071		854.39	0.013078		1384.39	0.01701914		1914.39	0.00603565		2444.38	0.00660043		2974.38	0.00704037		3504.37	0.0086631		4034.37	-0.00102371
324.6	0.00843262		854.59	0.01290041		1384.59	0.01637432		1914.59	0.00510147		2444.58	0.00809632		2974.58	0.00675244		3504.57	0.00843574		4034.57	-0.0015057
324.8	0.00698694		854.79	0.01168636		1384.79	0.01721223		1914.79	0.00456695		2444.78	0.00820192		2974.78	0.00735184		3504.77	0.00799195		4034.77	-0.00253856
325	0.00604434		854.99	0.01176305		1384.99	0.01849124		1914.99	0.00515096		2444.98	0.00815308		2974.98	0.00747757		3504.97	0.00735909		4034.97	-0.00287528
325.2	0.00560993		855.19	0.01154112		1385.19	0.01804583		1915.19	0.0055339		2445.18	0.00833144		2975.18	0.0070356		3505.17	0.0067217		4035.17	-0.00211454
325.4	0.00407866		855.39	0.01224919		1385.39	0.01707896		1915.39	0.00532334		2445.38	0.01026873		2975.38	0.00745313		3505.37	0.00706698		4035.37	-0.001852
325.6	0.00290841		855.59	0.01295579		1385.59	0.0177196		1915.59	0.00569833		2445.58	0.01038544		2975.58	0.00786001		3505.57	0.0079249		4035.57	-0.00163475
325.8	0.00229981		855.79	0.01268509		1385.79	0.01731857		1915.79	0.00587052		2445.78	0.01074747		2975.78	0.00712214		3505.77	0.0075511		4035.77	-0.00236478
326	0.00226515		855.99	0.01311126		1385.99	0.01712118		1915.99	0.00605621		2445.98	0.01089772		2975.98	0.00808609		3505.97	0.0084073		4035.97	-0.00184908
326.2	0.00267508		856.19	0.01320081		1386.19	0.01728407		1916.19	0.00638028		2446.18	0.01034102		2976.18	0.00704406		3506.17	0.0087598		4036.17	-0.00150034
326.4	0.00269836		856.39	0.01402889		1386.39	0.0181972		1916.39	0.00629915		2446.38	0.01009392		2976.38	0.00672479		3506.37	0.00966124		4036.37	-0.001644
326.6	0.0032074		856.59	0.01512602		1386.59	0.01829938		1916.59	0.00664185		2446.58	0.01010909		2976.58	0.00646062		3506.57	0.01015161		4036.57	-0.00106262
326.8	0.00333177		856.79	0.01495365		1386.79	0.01775514		1916.79	0.00604749		2446.78	0.0090209		2976.78	0.00590827		3506.77	0.01063388		4036.77	-0.00077637
327	0.00337207		856.99	0.01541848		1386.99	0.01776825		1916.99	0.0065782		2446.98	0.00850277		2976.98	0.00586449		3506.97	0.01163516		4036.97	-0.00116737
327.2	0.00300201		857.19	0.01577582		1387.19	0.0174944		1917.19	0.00707838		2447.18	0.00741864		2977.18	0.00636753		3507.17	0.01234318		4037.17	-0.00106095
327.4	0.00254734		857.39	0.0151886		1387.39	0.01740477		1917.39	0.00737578		2447.38	0.00775783		2977.38	0.0070048		3507.37	0.01375197		4037.37	-0.00091749
327.6	0.0024823		857.59	0.01475936		1387.59	0.01716519		1917.59	0.00672826		2447.58	0.00720566		2977.58	0.00663531		3507.57	0.0134034		4037.57	-0.00024789
327.8	0.00264796		857.79	0.01569361		1387.79	0.01679115		1917.79	0.0070602		2447.78	0.00740732		2977.78	0.00621435		3507.77	0.0129675		4037.77	0.00012629
328	0.0024917		857.99	0.01531857		1387.99	0.01613032		1917.99	0.00688481		2447.98	0.00731156		2977.98	0.00682356		3507.97	0.01259266		4037.97	-0.00022011
328.2	0.0028653		858.19	0.01521222		1388.19	0.01603909		1918.19	0.00627743		2448.18	0.00749197		2978.18	0.00693756		3508.17	0.01188389		4038.17	-0.00095794
328.4	0.00392384		858.39	0.01484075		1388.39	0.01549673		1918.39	0.00556859		2448.38	0.00731297		2978.38	0.00640225		3508.37	0.01119765		4038.37	-0.00037549
328.6	0.00444689		858.59	0.01581007		1388.59	0.01573013		1918.59	0.0053266		2448.58	0.00874369		2978.58	0.00642079		3508.57	0.01029698		4038.57	-0.0008758
328.8	0.00480602		858.79	0.01501211		1388.79	0.01621444		1918.79	0.00531276		2448.78	0.00889381		2978.78	0.00717664		3508.77	0.00940454		4038.77	-0.0015016
329	0.00603743		858.99	0.01521141		1388.99	0.01648129		1918.99	0.00591064		2448.98	0.00983083		2978.98	0.0072127		3508.97	0.00861383		4038.97	-0.00053198
329.2	0.00687928		859.19	0.01567502		1389.19	0.01569677		1919.19	0.00695294		2449.18	0.00995922		2979.18	0.0077193		3509.17	0.00881585		4039.17	0.0004915
329.4	0.00660559		859.39	0.01685761		1389.39	0.01555634		1919.39	0.00687648		2449.38	0.01029003		2979.38	0.00846567		3509.37	0.00883004		4039.37	0.00057374
329.6	0.00717603		859.59	0.01627688		1389.59	0.01618118		1919.59	0.00733429		2449.58	0.01035483		2979.58	0.0079248		3509.57	0.00998495		4039.57	-0.00055635
329.8	0.00725308		859.79	0.01666898		1389.79	0.01678726		1919.79	0.0070992		2449.78	0.01009122		2979.78	0.007043		3509.77	0.01003755		4039.77	-0.00124273
330	0.00720389		859.99	0.01663404		1389.99	0.01769882		1919.99	0.00666659		2449.98	0.00944046		2979.98	0.00737416		3509.97	0.01042348		4039.97	-0.00163025
330.2	0.00782487		860.19	0.01661418		1390.19	0.01894251		1920.19	0.00647814		2450.18	0.009376		2980.18	0.00611469		3510.17	0.01085383		4040.17	-0.00241275
330.4	0.00716603		860.39	0.01721994		1390.39	0.01969113		1920.39	0.00625822		2450.38	0.00884159		2980.38	0.00606537		3510.37	0.01228167		4040.37	-0.0025269
330.6	0.00686168		860.59	0.01762859		1390.59	0.01879042		1920.59	0.00686525		2450.58	0.00875015		2980.58	0.00519424		3510.57	0.01304076		4040.57	-0.00283565
330.8	0.00619827		860.79	0.01668569		1390.79	0.01848626		1920.79	0.00589164		2450.78	0.00815839		2980.78	0.00471695		3510.77	0.01408541		4040.77	-0.00419498
331	0.00661434		860.99	0.01599989		1390.99	0.01916073		1920.99	0.00615666		2450.98	0.00854098		2980.98	0.00467788		3510.97	0.01468282		4040.97	-0.00506709
331.2	0.00723644		861.19	0.01561169		1391.19	0.0197738		1921.19	0.00581271		2451.18	0.00820816		2981.18	0.00402768		3511.17	0.0147355		4041.17	-0.00569159
331.4	0.00713381		861.39	0.01450678		1391.39	0.01993963		1921.39	0.00505279		2451.38	0.00822602		2981.38	0.00423067		3511.37	0.0152322		4041.37	-0.00562611
331.6	0.00802986		861.59	0.01472325		1391.59	0.02005967		1921.59	0.00413822		2451.58	0.00802254		2981.58	0.00366936		3511.57	0.01422199		4041.57	-0.00563606
331.8	0.00867017		861.79	0.01555203		1391.79	0.01935272		1921.79	0.00413102		2451.78	0.00759133		2981.78	0.00338644		3511.77	0.0137621		4041.77	-0.00521368
332	0.00902398		861.99	0.01454571		1391.99	0.01893577		1921.99	0.00271664		2451.98	0.00761815		2981.98	0.00406766		3511.97	0.01331912		4041.97	-0.00393141
332.2	0.00973888		862.19	0.01488383		1392.19	0.01887911		1922.19	0.00205706		2452.18	0.00829619		2982.18	0.00484469		3512.17	0.01286862		4042.17	-0.00312651
332.4	0.00971033		862.39	0.0158091		1392.39	0.01844932		1922.39	0.00194378		2452.38	0.00792041		2982.38	0.00459223		3512.37	0.01232512		4042.37	-0.00173403
332.6	0.0094723		862.59	0.01657001		1392.59	0.01810271		1922.59	0.00182226		2452.58	0.00847576		2982.58	0.00552465		3512.57	0.01178021		4042.57	-0.00125906
332.8	0.00969893		862.79	0.01565318		1392.79	0.01791191		1922.79	0.00204275		2452.78	0.00837873		2982.78	0.006317		3512.77	0.01095114		4042.77	-0.00069682
333	0.00913639		862.99	0.01649477		1392.99	0.0183285		1922.99	0.00271188		2452.98	0.0083234		2982.98	0.00673681		3512.97	0.01009585		4042.97	0.00042832
333.2	0.00906102		863.19	0.016877		1393.19	0.01865868		1923.19	0.00308915		2453.18	0.00731083		2983.18	0.00714349		3513.17	0.00878547		4043.17	0.00089906
333.4	0.00774939		863.39	0.01784341		1393.39	0.0188705		1923.39	0.00284992		2453.38	0.00791583		2983.38	0.00607546		3513.37	0.00875285		4043.37	0.00119449
333.6	0.00709068		863.59	0.01800997		1393.59	0.01924461		1923.59	0.00340068		2453.58	0.00771849		2983.58	0.0050384		3513.57	0.00895906		4043.57	0.00005736
333.8	0.00592681		863.79	0.01952363		1393.79	0.01974641		1923.79	0.00378278		2453.78	0.00735763		2983.78	0.00566954		3513.77	0.00832353		4043.77	0.00002524
334	0.00533235		863.99	0.01952818		1393.99	0.02036393		1923.99	0.00437325		2453.98	0.00720573		2983.98	0.00521126		3513.97	0.00852655		4043.97	-0.00010571
334.2	0.00425461		864.19	0.01941561		1394.19	0.0204595		1924.19	0.00516212		2454.18	0.00740539		2984.18	0.00465081		3514.17	0.00987337		4044.17	-0.00012082
334.4	0.0030547		864.39	0.01894629		1394.39	0.02131167		1924.39	0.00609127		2454.38	0.00752441		2984.38	0.00488417		3514.37	0.01027496		4044.37	-0.00069698
334.6	0.00312259		864.59	0.01841896		1394.59	0.02193791		1924.59	0.00620366		2454.58	0.00775305		2984.58	0.00472017		3514.57	0.01081355		4044.57	-0.00134376
334.8	0.00304702		864.79	0.01727358		1394.79	0.0221164		1924.79	0.00574214		2454.78	0.00838039		2984.78	0.00467986		3514.77	0.01049193		4044.77	-0.00218427
335	0.00322097		864.99	0.01618932		1394.99	0.02240745		1924.99	0.00671674		2454.98	0.00820068		2984.98	0.00460788		3514.97	0.01050276		4044.97	-0.00209637
335.2	0.00340361		865.19	0.01549567		1395.19	0.02319627		1925.19	0.00696222		2455.18	0.00741006		2985.18	0.00439699		3515.17	0.01048329		4045.17	-0.002878
335.4	0.00348849		865.39	0.01549945		1395.39	0.02296928		1925.39	0.00752551		2455.38	0.00706278		2985.38	0.00489415		3515.37	0.01130874		4045.37	-0.00289429
335.6	0.00379929		865.59	0.01514227		1395.59	0.02305401		1925.59	0.00779668		2455.58	0.00724577		2985.58	0.00512813		3515.57	0.01118699		4045.57	-0.0031979
335.8	0.00368437		865.79	0.01498872		1395.79	0.02208584		1925.79	0.0083269		2455.78	0.00683125		2985.78	0.00543215		3515.77	0.01143372		4045.77	-0.00370775
336	0.00410249		865.99	0.01395057		1395.99	0.02145883		1925.99	0.00816131		2455.98	0.00789541		2985.98	0.00537202		3515.97	0.01158651		4045.97	-0.00285275
336.2	0.00476954		866.19	0.01410984		1396.19	0.02031584		1926.19	0.00877634		2456.18	0.008017		2986.18	0.00552039		3516.17	0.01109053		4046.17	-0.00367866
336.4	0.00512658		866.39	0.01333404		1396.39	0.01962303		1926.39	0.0086658		2456.38	0.007052		2986.38	0.00529064		3516.37	0.01071695		4046.37	-0.00325373
336.6	0.00525113		866.59	0.01263717		1396.59	0.01910421		1926.59	0.0088531		2456.58	0.00667093		2986.58	0.0055444		3516.57	0.01039573		4046.57	-0.00282811
336.8	0.00577186		866.79	0.01243636		1396.79	0.01902727		1926.79	0.00869698		2456.78	0.00742795		2986.78	0.00524412		3516.77	0.0100433		4046.77	-0.00271428
337	0.00594348		866.99	0.01237112		1396.99	0.01865921		1926.99	0.00841074		2456.98	0.0071047		2986.98	0.00498712		3516.97	0.01013752		4046.97	-0.00275065
337.2	0.00673795		867.19	0.01167303		1397.19	0.01850732		1927.19	0.00830699		2457.18	0.00795411		2987.18	0.00439929		3517.17	0.00930548		4047.17	-0.00272331
337.4	0.00693652		867.39	0.01300796		1397.39	0.01779174		1927.39	0.00849876		2457.38	0.00853163		2987.38	0.0040291		3517.37	0.00980805		4047.37	-0.00328736
337.6	0.00751649		867.59	0.01243438		1397.59	0.01793993		1927.59	0.00914516		2457.58	0.00768264		2987.58	0.00432152		3517.57	0.00929899		4047.57	-0.00344511
337.8	0.00728532		867.79	0.01299329		1397.79	0.01804636		1927.79	0.00934778		2457.78	0.00881723		2987.78	0.00446168		3517.77	0.00926375		4047.77	-0.00308195
338	0.0075114		867.99	0.01246298		1397.99	0.01810945		1927.99	0.0094048		2457.98	0.00861173		2987.98	0.00473449		3517.97	0.00962714		4047.97	-0.0035856
338.2	0.00762118		868.19	0.01273064		1398.19	0.01843079		1928.19	0.00934128		2458.18	0.00853094		2988.18	0.00553747		3518.17	0.0106272		4048.17	-0.00398165
338.4	0.00734045		868.39	0.01316026		1398.39	0.01938458		1928.39	0.00953273		2458.38	0.00873958		2988.38	0.00620574		3518.37	0.01057768		4048.37	-0.0037357
338.6	0.00733365		868.59	0.01364333		1398.59	0.01897701		1928.59	0.00909859		2458.58	0.0087797		2988.58	0.00690688		3518.57	0.01136105		4048.57	-0.00277336
338.8	0.00760512		868.79	0.0138016		1398.79	0.01831938		1928.79	0.00975305		2458.78	0.00909033		2988.78	0.00678599		3518.77	0.01142197		4048.77	-0.00254336
339	0.00770881		868.99	0.01432193		1398.99	0.01850194		1928.99	0.00929177		2458.98	0.00833226		2988.98	0.00741722		3518.97	0.0121195		4048.97	-0.00227297
339.2	0.00853363		869.19	0.01556268		1399.19	0.01994714		1929.19	0.00881392		2459.18	0.00764433		2989.18	0.007543		3519.17	0.01238162		4049.17	-0.00305862
339.4	0.00869003		869.39	0.01619038		1399.39	0.01971897		1929.39	0.00791732		2459.38	0.00776702		2989.38	0.0078135		3519.37	0.01289166		4049.37	-0.00319864
339.6	0.0088357		869.59	0.01620379		1399.59	0.0201652		1929.59	0.0071807		2459.58	0.00785399		2989.58	0.00736567		3519.57	0.01246299		4049.57	-0.00342592
339.8	0.00931117		869.79	0.01609143		1399.79	0.01992167		1929.79	0.00774858		2459.78	0.0077658		2989.78	0.00622885		3519.77	0.01207138		4049.77	-0.00366356
340	0.00986449		869.99	0.01546238		1399.99	0.01939938		1929.99	0.00750045		2459.98	0.00763086		2989.98	0.00561178		3519.97	0.01166864		4049.97	-0.00331569
340.2	0.00996246		870.19	0.01556959		1400.19	0.01872085		1930.19	0.00679359		2460.18	0.00675373		2990.18	0.0063475		3520.17	0.01069724		4050.17	-0.00278583
340.4	0.01041112		870.39	0.01597172		1400.39	0.01942625		1930.39	0.00657405		2460.38	0.00663458		2990.38	0.00577985		3520.37	0.0099739		4050.37	-0.00204243
340.6	0.00939251		870.59	0.01576891		1400.59	0.02002515		1930.59	0.00633911		2460.58	0.00683179		2990.58	0.00658834		3520.57	0.01041436		4050.57	-0.0024492
340.8	0.00964229		870.79	0.01547233		1400.79	0.01986882		1930.79	0.00523063		2460.78	0.00802111		2990.78	0.00615717		3520.77	0.01018464		4050.77	-0.00277836
341	0.010018		870.99	0.01566426		1400.99	0.01938701		1930.99	0.00453717		2460.98	0.00800052		2990.98	0.00529684		3520.97	0.00951538		4050.97	-0.0022859
341.2	0.00966072		871.19	0.01600881		1401.19	0.02000918		1931.19	0.00525138		2461.18	0.00786212		2991.18	0.00479847		3521.17	0.00787695		4051.17	-0.00268762
341.4	0.00939981		871.39	0.01650047		1401.39	0.01957834		1931.39	0.00588953		2461.38	0.00719088		2991.38	0.00491642		3521.37	0.00751035		4051.37	-0.00220885
341.6	0.00864825		871.59	0.01606354		1401.59	0.01969898		1931.59	0.0063904		2461.58	0.00652677		2991.58	0.00421849		3521.57	0.00662922		4051.57	-0.00236281
341.8	0.00810214		871.79	0.01737092		1401.79	0.01957763		1931.79	0.00663815		2461.78	0.00657932		2991.78	0.00399009		3521.77	0.00720185		4051.77	-0.00216078
342	0.00816922		871.99	0.01811584		1401.99	0.01956991		1931.99	0.00755594		2461.98	0.00552263		2991.98	0.00496608		3521.97	0.00749097		4051.97	-0.00240503
342.2	0.00851458		872.19	0.01732557		1402.19	0.01965242		1932.19	0.00807408		2462.18	0.00465373		2992.18	0.00502978		3522.17	0.0080061		4052.17	-0.00225211
342.4	0.00833541		872.39	0.01778002		1402.39	0.01930941		1932.39	0.00856418		2462.38	0.00445386		2992.38	0.00491821		3522.37	0.00838355		4052.37	-0.00185208
342.6	0.00895485		872.59	0.01874112		1402.59	0.01941448		1932.59	0.00886684		2462.58	0.00459346		2992.58	0.00538252		3522.57	0.00886027		4052.57	-0.00151142
342.8	0.00963697		872.79	0.01818178		1402.79	0.01998624		1932.79	0.00861904		2462.78	0.00548738		2992.78	0.00505163		3522.77	0.00940027		4052.77	-0.00182514
343	0.00959793		872.99	0.01808033		1402.99	0.02005035		1932.99	0.00779659		2462.98	0.00596985		2992.98	0.00551298		3522.97	0.01007108		4052.97	-0.00230808
343.2	0.00996524		873.19	0.01751495		1403.19	0.01999565		1933.19	0.0074701		2463.18	0.00670287		2993.18	0.00524908		3523.17	0.01000815		4053.17	-0.00308726
343.4	0.01048215		873.39	0.01596761		1403.39	0.0190203		1933.39	0.00727574		2463.38	0.00743898		2993.38	0.00490503		3523.37	0.00955256		4053.37	-0.00288326
343.6	0.01093822		873.59	0.01474313		1403.59	0.0184419		1933.59	0.00794636		2463.58	0.00834202		2993.58	0.00462365		3523.57	0.00900496		4053.57	-0.00283556
343.8	0.01046171		873.79	0.0141528		1403.79	0.01800727		1933.79	0.00865213		2463.78	0.00852798		2993.78	0.00476493		3523.77	0.00881344		4053.77	-0.00221576
344	0.00946661		873.99	0.01264705		1403.99	0.0168945		1933.99	0.0083195		2463.98	0.00913029		2993.98	0.0053113		3523.97	0.00878293		4053.97	-0.00196677
344.2	0.0083969		874.19	0.01315684		1404.19	0.01666988		1934.19	0.00823871		2464.18	0.00995759		2994.18	0.00596947		3524.17	0.0080035		4054.17	-0.00245158
344.4	0.00762086		874.39	0.01269171		1404.39	0.01693421		1934.39	0.00885445		2464.38	0.01017131		2994.38	0.00621744		3524.37	0.00825975		4054.37	-0.00337259
344.6	0.0063748		874.59	0.01149548		1404.59	0.01702329		1934.59	0.00829174		2464.58	0.01045117		2994.58	0.00698785		3524.57	0.00913961		4054.57	-0.00402081
344.8	0.00588871		874.79	0.01062239		1404.79	0.01606236		1934.79	0.00823048		2464.78	0.01044703		2994.78	0.00665771		3524.77	0.00858476		4054.77	-0.00284634
345	0.00559752		874.99	0.01149839		1404.99	0.01566319		1934.99	0.00776041		2464.98	0.00977833		2994.98	0.00674876		3524.97	0.00747372		4054.97	-0.00284169
345.2	0.00397827		875.19	0.01121211		1405.19	0.01575014		1935.19	0.00819477		2465.18	0.00902007		2995.18	0.00703235		3525.17	0.00720842		4055.17	-0.00375246
345.4	0.0035112		875.39	0.01156197		1405.39	0.0157039		1935.39	0.0082657		2465.38	0.00942113		2995.38	0.00609431		3525.37	0.00769182		4055.37	-0.00326832
345.6	0.00319257		875.59	0.01242555		1405.59	0.01607763		1935.59	0.00844536		2465.58	0.0084058		2995.58	0.00601905		3525.57	0.00861713		4055.57	-0.00389591
345.8	0.00340418		875.79	0.01310822		1405.79	0.01671087		1935.79	0.0082805		2465.78	0.0078793		2995.78	0.00570559		3525.77	0.01016061		4055.77	-0.00306092
346	0.00391486		875.99	0.01329527		1405.99	0.01716664		1935.99	0.00824786		2465.98	0.00719917		2995.98	0.00546054		3525.97	0.01134314		4055.97	-0.00404081
346.2	0.0047863		876.19	0.01263215		1406.19	0.01740544		1936.19	0.00822408		2466.18	0.00595733		2996.18	0.00576595		3526.17	0.01164602		4056.17	-0.00412834
346.4	0.0056986		876.39	0.01388683		1406.39	0.01815574		1936.39	0.00761541		2466.38	0.00576379		2996.38	0.0053589		3526.37	0.01255323		4056.37	-0.00406964
346.6	0.00625239		876.59	0.01408154		1406.59	0.01817388		1936.59	0.0081049		2466.58	0.00574898		2996.58	0.00573102		3526.57	0.01311488		4056.57	-0.00458018
346.8	0.00714274		876.79	0.01404733		1406.79	0.01817841		1936.79	0.00794636		2466.78	0.00641141		2996.78	0.0060517		3526.77	0.0133696		4056.77	-0.00460903
347	0.00728668		876.99	0.01413271		1406.99	0.01729245		1936.99	0.00759181		2466.98	0.00616069		2996.98	0.00647106		3526.97	0.01314324		4056.97	-0.0046721
347.2	0.00837194		877.19	0.01330447		1407.19	0.01709911		1937.19	0.00754751		2467.18	0.00589923		2997.18	0.00612817		3527.17	0.01290458		4057.17	-0.0045524
347.4	0.0084796		877.39	0.01327501		1407.39	0.01695943		1937.39	0.0080326		2467.38	0.00563526		2997.38	0.0062159		3527.37	0.0121296		4057.37	-0.00378717
347.6	0.00860954		877.59	0.01345081		1407.59	0.01752923		1937.59	0.00760892		2467.58	0.00669252		2997.58	0.00621661		3527.57	0.01206935		4057.57	-0.00248977
347.8	0.0084327		877.79	0.01365165		1407.79	0.01826602		1937.79	0.00844318		2467.78	0.00657293		2997.78	0.00584128		3527.77	0.01217089		4057.77	-0.00283521
348	0.00693518		877.99	0.01303882		1407.99	0.01785426		1937.99	0.00824548		2467.98	0.0070795		2997.98	0.0057897		3527.97	0.01203126		4057.97	-0.0037112
348.2	0.00718452		878.19	0.01384881		1408.19	0.01845328		1938.19	0.00862058		2468.18	0.00726929		2998.18	0.00583402		3528.17	0.01156696		4058.17	-0.00386978
348.4	0.00668483		878.39	0.01255549		1408.39	0.0194024		1938.39	0.00879751		2468.38	0.00717331		2998.38	0.00634607		3528.37	0.01115222		4058.37	-0.00374461
348.6	0.00649829		878.59	0.01193588		1408.59	0.02030207		1938.59	0.00858299		2468.58	0.00750981		2998.58	0.00627861		3528.57	0.01104085		4058.57	-0.00316919
348.8	0.00587412		878.79	0.01134456		1408.79	0.01950981		1938.79	0.00771819		2468.78	0.00707131		2998.78	0.0058646		3528.77	0.01003514		4058.77	-0.00201484
349	0.00530921		878.99	0.01288087		1408.99	0.0196218		1938.99	0.00623115		2468.98	0.00773626		2998.98	0.00511728		3528.97	0.00939625		4058.97	-0.00240398
349.2	0.00414517		879.19	0.01288241		1409.19	0.0196793		1939.19	0.00619		2469.18	0.00794949		2999.18	0.00378792		3529.17	0.00974822		4059.17	-0.00256839
349.4	0.00354411		879.39	0.01334333		1409.39	0.02008366		1939.39	0.00624227		2469.38	0.00847743		2999.38	0.00247369		3529.37	0.00969522		4059.37	-0.0017039
349.6	0.0030659		879.59	0.01366163		1409.59	0.0201561		1939.59	0.0056973		2469.58	0.00781848		2999.58	0.00263248		3529.57	0.00999466		4059.57	-0.00180942
349.8	0.00365039		879.79	0.01408115		1409.79	0.0205854		1939.79	0.00448563		2469.78	0.00824403		2999.78	0.00190512		3529.77	0.01046475		4059.77	-0.00143977
350	0.00359163		879.99	0.01409319		1409.99	0.02037352		1939.99	0.00425698		2469.98	0.0084304		2999.98	0.0019791		3529.97	0.01051191		4059.97	-0.00135303
350.2	0.0044123		880.19	0.01417373		1410.19	0.01972916		1940.19	0.00436375		2470.18	0.00818186		3000.18	0.00336978		3530.17	0.00997135		4060.17	-0.00042094
350.4	0.00469015		880.39	0.01460806		1410.39	0.01929645		1940.39	0.00377757		2470.38	0.0083151		3000.38	0.00347097		3530.37	0.01060497		4060.37	-0.00061006
350.6	0.00503011		880.59	0.01502162		1410.59	0.018828		1940.59	0.00439745		2470.58	0.00759702		3000.58	0.0042171		3530.57	0.01081407		4060.57	-0.00011181
350.8	0.00545803		880.79	0.01512114		1410.79	0.01945227		1940.79	0.00502702		2470.78	0.00798252		3000.78	0.00437132		3530.77	0.01073835		4060.77	-0.00017548
351	0.00527238		880.99	0.01509843		1410.99	0.01907816		1940.99	0.00435271		2470.98	0.00766002		3000.98	0.00453373		3530.97	0.01105112		4060.97	-0.00039162
351.2	0.00574216		881.19	0.01467401		1411.19	0.01934243		1941.19	0.00422116		2471.18	0.00772106		3001.18	0.00455826		3531.17	0.01094048		4061.17	-0.00018398
351.4	0.00645141		881.39	0.01457072		1411.39	0.01996587		1941.39	0.00448665		2471.38	0.00847551		3001.38	0.00578701		3531.37	0.01126091		4061.37	0.0004592
351.6	0.00667198		881.59	0.01503442		1411.59	0.0205607		1941.59	0.00458305		2471.58	0.0090106		3001.58	0.0056898		3531.57	0.011759		4061.57	0.00024954
351.8	0.00725151		881.79	0.01543081		1411.79	0.0197985		1941.79	0.00547674		2471.78	0.00858541		3001.78	0.005747		3531.77	0.01171655		4061.77	-0.00155581
352	0.00654328		881.99	0.01571781		1411.99	0.01911332		1941.99	0.00511705		2471.98	0.00889109		3001.98	0.00576165		3531.97	0.01191324		4061.97	-0.00215969
352.2	0.00783133		882.19	0.01593116		1412.19	0.01924615		1942.19	0.00588977		2472.18	0.00905655		3002.18	0.00581101		3532.17	0.01125868		4062.17	-0.00236101
352.4	0.00725558		882.39	0.0159694		1412.39	0.01923028		1942.39	0.00635917		2472.38	0.00917464		3002.38	0.00650246		3532.37	0.0112213		4062.37	-0.00247518
352.6	0.0073218		882.59	0.0164054		1412.59	0.01955647		1942.59	0.006345		2472.58	0.00897804		3002.58	0.00655228		3532.57	0.01116252		4062.57	-0.00195937
352.8	0.00677797		882.79	0.01598472		1412.79	0.01915142		1942.79	0.00638773		2472.78	0.00843316		3002.78	0.00535766		3532.77	0.0106495		4062.77	-0.00183653
353	0.0054948		882.99	0.01723242		1412.99	0.01923815		1942.99	0.00646608		2472.98	0.0087929		3002.98	0.0051069		3532.97	0.01071134		4062.97	-0.00239879
353.2	0.00470298		883.19	0.01666414		1413.19	0.01812677		1943.19	0.00690234		2473.18	0.0079933		3003.18	0.00503525		3533.17	0.01048736		4063.17	-0.00272847
353.4	0.00376506		883.39	0.01717514		1413.39	0.01777817		1943.39	0.00716223		2473.38	0.0081894		3003.38	0.00501475		3533.37	0.01024846		4063.37	-0.00196577
353.6	0.00344316		883.59	0.01694735		1413.59	0.01701418		1943.59	0.00748924		2473.58	0.00871552		3003.58	0.00559344		3533.57	0.01025202		4063.57	-0.00239251
353.8	0.00395005		883.79	0.01542731		1413.79	0.0167565		1943.79	0.00844576		2473.78	0.00928092		3003.78	0.00522045		3533.77	0.01075952		4063.77	-0.00184295
354	0.00360342		883.99	0.014755		1413.99	0.01588043		1943.99	0.0101059		2473.98	0.00979351		3003.98	0.00494809		3533.97	0.00982704		4063.97	-0.00130253
354.2	0.00417015		884.19	0.01387648		1414.19	0.01626332		1944.19	0.01092746		2474.18	0.0098856		3004.18	0.00513265		3534.17	0.00983483		4064.17	-0.00086698
354.4	0.00445488		884.39	0.01350177		1414.39	0.01713475		1944.39	0.01161438		2474.38	0.00939954		3004.38	0.00471914		3534.37	0.01001704		4064.37	-0.00104388
354.6	0.00555785		884.59	0.01292614		1414.59	0.01794116		1944.59	0.01182343		2474.58	0.00944159		3004.58	0.00506668		3534.57	0.01001606		4064.57	-0.00039879
354.8	0.00575826		884.79	0.01231163		1414.79	0.01816952		1944.79	0.01163465		2474.78	0.01059522		3004.78	0.00463998		3534.77	0.00972921		4064.77	-0.00079825
355	0.00643387		884.99	0.01203539		1414.99	0.01809562		1944.99	0.00988058		2474.98	0.01041454		3004.98	0.00494857		3534.97	0.00952765		4064.97	0.00025376
355.2	0.00742359		885.19	0.01096553		1415.19	0.01779272		1945.19	0.00834108		2475.18	0.01084334		3005.18	0.00526058		3535.17	0.00928773		4065.17	0.00054667
355.4	0.00784407		885.39	0.01083729		1415.39	0.01756121		1945.39	0.00777396		2475.38	0.01014124		3005.38	0.00595939		3535.37	0.01036769		4065.37	0.00043929
355.6	0.00726199		885.59	0.01109742		1415.59	0.01689727		1945.59	0.0070434		2475.58	0.0095592		3005.58	0.00494952		3535.57	0.01030135		4065.57	-0.00045555
355.8	0.00805817		885.79	0.01145923		1415.79	0.01674795		1945.79	0.00640849		2475.78	0.00943741		3005.78	0.00516956		3535.77	0.0100078		4065.77	-0.00076402
356	0.0085192		885.99	0.01139003		1415.99	0.0167415		1945.99	0.00552578		2475.98	0.00947183		3005.98	0.00527759		3535.97	0.00996233		4065.97	-0.00084322
356.2	0.00913915		886.19	0.01223836		1416.19	0.01743836		1946.19	0.005159		2476.18	0.00972933		3006.18	0.0056666		3536.17	0.00980815		4066.17	-0.00099769
356.4	0.00887394		886.39	0.0126018		1416.39	0.01872287		1946.39	0.00498635		2476.38	0.00942742		3006.38	0.00585746		3536.37	0.00992294		4066.37	-0.00079302
356.6	0.00901901		886.59	0.01275809		1416.59	0.01997822		1946.59	0.00449284		2476.58	0.00874469		3006.58	0.00598969		3536.57	0.01005283		4066.57	-0.00145596
356.8	0.00944592		886.79	0.01285714		1416.79	0.0201534		1946.79	0.00398916		2476.78	0.00819308		3006.78	0.00635856		3536.77	0.01016273		4066.77	-0.00135224
357	0.00882196		886.99	0.01402205		1416.99	0.01968727		1946.99	0.00373234		2476.98	0.00831116		3006.98	0.00650741		3536.97	0.00959195		4066.97	-0.00177454
357.2	0.00864946		887.19	0.01402856		1417.19	0.01847441		1947.19	0.00482541		2477.18	0.00813004		3007.18	0.0067466		3537.17	0.01018374		4067.17	-0.00165782
357.4	0.00828096		887.39	0.01450602		1417.39	0.01882943		1947.39	0.00535316		2477.38	0.00881589		3007.38	0.00659744		3537.37	0.0110938		4067.37	-0.00137047
357.6	0.00843846		887.59	0.01312322		1417.59	0.01840005		1947.59	0.0068131		2477.58	0.00993049		3007.58	0.0069912		3537.57	0.01123567		4067.57	-0.00176122
357.8	0.00874769		887.79	0.01319332		1417.79	0.01877744		1947.79	0.00841554		2477.78	0.00979783		3007.78	0.00610375		3537.77	0.0115165		4067.77	-0.00194411
358	0.00905409		887.99	0.01412289		1417.99	0.01866122		1947.99	0.00993444		2477.98	0.01040925		3007.98	0.00626055		3537.97	0.01068883		4067.97	-0.00234016
358.2	0.0097663		888.19	0.01437405		1418.19	0.01990177		1948.19	0.01017926		2478.18	0.01030011		3008.18	0.0063839		3538.17	0.01056727		4068.17	-0.00239906
358.4	0.01037536		888.39	0.01545918		1418.39	0.02000106		1948.39	0.01066696		2478.38	0.01039821		3008.38	0.0064917		3538.37	0.00988027		4068.37	-0.00225502
358.6	0.01057277		888.59	0.01614055		1418.59	0.01929766		1948.59	0.01039932		2478.58	0.01180689		3008.58	0.00618434		3538.57	0.01017999		4068.57	-0.0018672
358.8	0.01105621		888.79	0.01594678		1418.79	0.01903616		1948.79	0.00992026		2478.78	0.01205064		3008.78	0.00523651		3538.77	0.00932246		4068.77	-0.00162158
359	0.01220196		888.99	0.01561907		1418.99	0.01916574		1948.99	0.00963143		2478.98	0.0115516		3008.98	0.00512664		3538.97	0.00873751		4068.97	-0.0022602
359.2	0.01250507		889.19	0.01511512		1419.19	0.01807625		1949.19	0.00932818		2479.18	0.01165543		3009.18	0.0054008		3539.17	0.00851695		4069.17	-0.00275816
359.4	0.01209197		889.39	0.01566263		1419.39	0.01781398		1949.39	0.01040745		2479.38	0.01068555		3009.38	0.00504242		3539.37	0.00928551		4069.37	-0.00217784
359.6	0.01209457		889.59	0.01576287		1419.59	0.01795621		1949.59	0.00984172		2479.58	0.01072763		3009.58	0.00448852		3539.57	0.00905096		4069.57	-0.00162628
359.8	0.01224313		889.79	0.01605646		1419.79	0.01835756		1949.79	0.01006805		2479.78	0.01048012		3009.78	0.00488281		3539.77	0.00839049		4069.77	-0.00198979
360	0.01266063		889.99	0.0164012		1419.99	0.01835903		1949.99	0.00975513		2479.98	0.01060757		3009.98	0.00380527		3539.97	0.00877506		4069.97	-0.00245151
360.2	0.01201818		890.19	0.01716178		1420.19	0.01908825		1950.19	0.00931817		2480.18	0.01077302		3010.18	0.00274401		3540.17	0.00973986		4070.17	-0.00215524
360.4	0.01188111		890.39	0.01702779		1420.39	0.01958701		1950.39	0.00867281		2480.38	0.01011846		3010.38	0.00281408		3540.37	0.01023585		4070.37	-0.0015037
360.6	0.01168619		890.59	0.01645989		1420.59	0.01929249		1950.59	0.00817691		2480.58	0.00964008		3010.58	0.00366659		3540.57	0.009982		4070.57	-0.00128609
360.8	0.01174305		890.79	0.01724359		1420.79	0.01906574		1950.79	0.00749916		2480.78	0.00975713		3010.78	0.00401845		3540.77	0.01029286		4070.77	0.00047806
361	0.01074354		890.99	0.01708424		1420.99	0.01812033		1950.99	0.00822048		2480.98	0.00951684		3010.98	0.00429737		3540.97	0.01062562		4070.97	0.00089196
361.2	0.0097813		891.19	0.01632334		1421.19	0.01683942		1951.19	0.0078248		2481.18	0.00910564		3011.18	0.00532066		3541.17	0.01215386		4071.17	0.00142219
361.4	0.00948136		891.39	0.01610559		1421.39	0.01668226		1951.39	0.00783316		2481.38	0.00921044		3011.38	0.00608111		3541.37	0.01271449		4071.37	0.00189838
361.6	0.00912678		891.59	0.01502523		1421.59	0.01588692		1951.59	0.00850554		2481.58	0.01016084		3011.58	0.00674606		3541.57	0.01300302		4071.57	0.00211917
361.8	0.00863449		891.79	0.01547748		1421.79	0.01557577		1951.79	0.00864544		2481.78	0.01050377		3011.78	0.007035		3541.77	0.01315226		4071.77	0.00144419
362	0.00872787		891.99	0.01501481		1421.99	0.01562924		1951.99	0.00861191		2481.98	0.01033374		3011.98	0.00753364		3541.97	0.01284934		4071.97	0.0016446
362.2	0.00935907		892.19	0.01498024		1422.19	0.01647041		1952.19	0.00837486		2482.18	0.00979324		3012.18	0.00688621		3542.17	0.01298484		4072.17	0.0022074
362.4	0.00996406		892.39	0.01438004		1422.39	0.01614595		1952.39	0.00870804		2482.38	0.0099506		3012.38	0.00679951		3542.37	0.01280676		4072.37	0.00244655
362.6	0.01004494		892.59	0.01359359		1422.59	0.01658081		1952.59	0.00875972		2482.58	0.01038752		3012.58	0.00559598		3542.57	0.0139166		4072.57	0.00151484
362.8	0.01143237		892.79	0.01271276		1422.79	0.01772382		1952.79	0.00834056		2482.78	0.00963012		3012.78	0.00527467		3542.77	0.01302888		4072.77	0.00109019
363	0.01124496		892.99	0.01221674		1422.99	0.0180676		1952.99	0.00831571		2482.98	0.00934995		3012.98	0.00578095		3542.97	0.01327641		4072.97	-0.00087879
363.2	0.010384		893.19	0.01158855		1423.19	0.01731462		1953.19	0.00813955		2483.18	0.00908928		3013.18	0.00562339		3543.17	0.01376706		4073.17	-0.00036283
363.4	0.01021075		893.39	0.01163996		1423.39	0.01788771		1953.39	0.00817314		2483.38	0.00825487		3013.38	0.00517302		3543.37	0.01413819		4073.37	-0.00009287
363.6	0.00960788		893.59	0.01156299		1423.59	0.01826657		1953.59	0.00626124		2483.58	0.00745652		3013.58	0.0055815		3543.57	0.01341681		4073.57	-0.00059269
363.8	0.0089036		893.79	0.0119252		1423.79	0.0181404		1953.79	0.00660576		2483.78	0.00702119		3013.78	0.00534127		3543.77	0.01315725		4073.77	-0.00127756
364	0.00906862		893.99	0.01275051		1423.99	0.01858027		1953.99	0.00650629		2483.98	0.00704151		3013.98	0.00382984		3543.97	0.01269074		4073.97	-0.00113176
364.2	0.00820895		894.19	0.01309478		1424.19	0.01886169		1954.19	0.00602581		2484.18	0.0068545		3014.18	0.00400675		3544.17	0.01243248		4074.17	-0.00094192
364.4	0.00733357		894.39	0.0130821		1424.39	0.01916828		1954.39	0.00659068		2484.38	0.0064615		3014.38	0.00405315		3544.37	0.01221921		4074.37	-0.00092674
364.6	0.00665942		894.59	0.01263457		1424.59	0.01919198		1954.59	0.00662172		2484.58	0.00655721		3014.58	0.00429433		3544.57	0.01144874		4074.57	-0.00059605
364.8	0.00639864		894.79	0.01395909		1424.79	0.01957236		1954.79	0.00679343		2484.78	0.00716728		3014.78	0.00406652		3544.77	0.0115926		4074.77	0.00056489
365	0.00592967		894.99	0.01444835		1424.99	0.01907032		1954.99	0.00742031		2484.98	0.0067025		3014.98	0.00510625		3544.97	0.0110661		4074.97	0.00083246
365.2	0.00580409		895.19	0.01449504		1425.19	0.01908501		1955.19	0.00750318		2485.18	0.00685587		3015.18	0.00529866		3545.17	0.01118037		4075.17	0.00094988
365.4	0.00568545		895.39	0.0155931		1425.39	0.01883559		1955.39	0.00837454		2485.38	0.00805331		3015.38	0.00569504		3545.37	0.0115487		4075.37	0.00191126
365.6	0.00551621		895.59	0.01555694		1425.59	0.01861149		1955.59	0.00836212		2485.58	0.00932249		3015.58	0.0058427		3545.57	0.01085934		4075.57	0.00202488
365.8	0.00571615		895.79	0.01628569		1425.79	0.01874328		1955.79	0.00892184		2485.78	0.00887844		3015.78	0.00618534		3545.77	0.0108843		4075.77	0.00136324
366	0.00590787		895.99	0.0156856		1425.99	0.01907197		1955.99	0.01007242		2485.98	0.00815208		3015.98	0.00573591		3545.97	0.01143124		4075.97	0.00174358
366.2	0.00719285		896.19	0.01617524		1426.19	0.01979917		1956.19	0.0113823		2486.18	0.00878205		3016.18	0.00555172		3546.17	0.01188032		4076.17	0.00197941
366.4	0.00855965		896.39	0.01532311		1426.39	0.01941305		1956.39	0.01202043		2486.38	0.00934698		3016.38	0.00581172		3546.37	0.0120317		4076.37	0.00145659
366.6	0.00903635		896.59	0.01538024		1426.59	0.01997456		1956.59	0.01091142		2486.58	0.008976		3016.58	0.00557349		3546.57	0.01288682		4076.57	0.00073026
366.8	0.00963381		896.79	0.01528356		1426.79	0.02006127		1956.79	0.01003618		2486.78	0.00894067		3016.78	0.00630191		3546.77	0.01309903		4076.77	0.00030931
367	0.00973933		896.99	0.01373627		1426.99	0.01948006		1956.99	0.01028766		2486.98	0.00914031		3016.98	0.00608329		3546.97	0.014103		4076.97	0.0000276
367.2	0.01039803		897.19	0.01334789		1427.19	0.01862473		1957.19	0.00927935		2487.18	0.00912757		3017.18	0.00507428		3547.17	0.01398584		4077.17	0.00031185
367.4	0.01133438		897.39	0.01265139		1427.39	0.0183084		1957.39	0.00862196		2487.38	0.00833943		3017.38	0.00607608		3547.37	0.01360057		4077.37	0.00019696
367.6	0.01125386		897.59	0.01278645		1427.59	0.01755359		1957.59	0.00811164		2487.58	0.0076586		3017.58	0.00627785		3547.57	0.01302594		4077.57	-0.00030407
367.8	0.01072664		897.79	0.01293612		1427.79	0.01748302		1957.79	0.0087046		2487.78	0.0082176		3017.78	0.00487281		3547.77	0.01287075		4077.77	-0.00041673
368	0.01077319		897.99	0.01332246		1427.99	0.01750847		1957.99	0.00876132		2487.98	0.00866835		3017.98	0.00481705		3547.97	0.0120477		4077.97	-0.00084432
368.2	0.00967301		898.19	0.01274145		1428.19	0.01707281		1958.19	0.00917136		2488.18	0.0088986		3018.18	0.00514774		3548.17	0.01303429		4078.17	-0.00139178
368.4	0.0087237		898.39	0.01301068		1428.39	0.01732423		1958.39	0.00942905		2488.38	0.00924296		3018.38	0.00488448		3548.37	0.0130789		4078.37	-0.00110735
368.6	0.00889413		898.59	0.01327214		1428.59	0.01740463		1958.59	0.00873119		2488.58	0.00961761		3018.58	0.00459347		3548.57	0.01345448		4078.57	-0.00048505
368.8	0.00886747		898.79	0.01486977		1428.79	0.0180687		1958.79	0.00844002		2488.78	0.00936575		3018.78	0.00358741		3548.77	0.01329734		4078.77	-0.00017188
369	0.0083736		898.99	0.01523881		1428.99	0.01802099		1958.99	0.00830668		2488.98	0.00857196		3018.98	0.00364165		3548.97	0.01351647		4078.97	0.00032895
369.2	0.00768591		899.19	0.01532413		1429.19	0.01795553		1959.19	0.00728537		2489.18	0.00845029		3019.18	0.00345657		3549.17	0.01330468		4079.17	0.00028442
369.4	0.00735885		899.39	0.01641482		1429.39	0.01795545		1959.39	0.00652652		2489.38	0.00847641		3019.38	0.00333767		3549.37	0.0126328		4079.37	0.00049904
369.6	0.0080279		899.59	0.01638036		1429.59	0.01882051		1959.59	0.00635983		2489.58	0.00794294		3019.58	0.00334207		3549.57	0.01206245		4079.57	0.0002597
369.8	0.00903122		899.79	0.01629862		1429.79	0.01960043		1959.79	0.00714158		2489.78	0.0071914		3019.78	0.00309887		3549.77	0.01234131		4079.77	-0.00031319
370	0.00931378		899.99	0.01578546		1429.99	0.02007936		1959.99	0.00757498		2489.98	0.00769424		3019.98	0.00311662		3549.97	0.01165911		4079.97	-0.0005768
370.2	0.01046453		900.19	0.01608353		1430.19	0.021319		1960.19	0.00713169		2490.18	0.00814944		3020.18	0.00336251		3550.17	0.01147695		4080.17	-0.00096969
370.4	0.01170795		900.39	0.01442902		1430.39	0.02128493		1960.39	0.00663872		2490.38	0.00793383		3020.38	0.00313019		3550.37	0.01065122		4080.37	-0.00144121
370.6	0.01133019		900.59	0.01446385		1430.59	0.02169697		1960.59	0.00616364		2490.58	0.00718382		3020.58	0.00331358		3550.57	0.00995715		4080.57	-0.00159706
370.8	0.01117344		900.79	0.01369159		1430.79	0.02198091		1960.79	0.00678184		2490.78	0.00747611		3020.78	0.00295731		3550.77	0.01011762		4080.77	-0.00076127
371	0.01201201		900.99	0.01241513		1430.99	0.02178924		1960.99	0.00702078		2490.98	0.00779872		3020.98	0.0031304		3550.97	0.01000323		4080.97	0.00007003
371.2	0.01215929		901.19	0.01253419		1431.19	0.02114012		1961.19	0.0067779		2491.18	0.00821727		3021.18	0.00328154		3551.17	0.00954242		4081.17	-0.00031288
371.4	0.0120496		901.39	0.01198536		1431.39	0.02092243		1961.39	0.00732261		2491.38	0.00799183		3021.38	0.00476518		3551.37	0.00882898		4081.37	0.0007641
371.6	0.01124738		901.59	0.01222667		1431.59	0.02040408		1961.59	0.00723161		2491.58	0.00807933		3021.58	0.00476075		3551.57	0.00903843		4081.57	0.00096581
371.8	0.01085478		901.79	0.0127544		1431.79	0.0209952		1961.79	0.00744034		2491.78	0.00927154		3021.78	0.00531555		3551.77	0.00952956		4081.77	0.00157845
372	0.01050617		901.99	0.01248483		1431.99	0.01983649		1961.99	0.00842553		2491.98	0.00944353		3021.98	0.00601852		3551.97	0.01016319		4081.97	0.00183513
372.2	0.00909495		902.19	0.01195026		1432.19	0.01823646		1962.19	0.00943722		2492.18	0.00909864		3022.18	0.00589809		3552.17	0.01069883		4082.17	0.0021127
372.4	0.00842191		902.39	0.01256483		1432.39	0.01836253		1962.39	0.01010832		2492.38	0.00967167		3022.38	0.00585495		3552.37	0.01123391		4082.37	0.00194865
372.6	0.00835864		902.59	0.01273025		1432.59	0.01782028		1962.59	0.01096821		2492.58	0.00956141		3022.58	0.00515875		3552.57	0.01245498		4082.57	0.00203263
372.8	0.00702231		902.79	0.01343608		1432.79	0.0185429		1962.79	0.01103958		2492.78	0.00998632		3022.78	0.00488228		3552.77	0.01295813		4082.77	0.00222641
373	0.00737129		902.99	0.01378124		1432.99	0.01820671		1962.99	0.01062776		2492.98	0.01045471		3022.98	0.005395		3552.97	0.01295906		4082.97	0.00263563
373.2	0.00723794		903.19	0.0139886		1433.19	0.01828021		1963.19	0.0095434		2493.18	0.01084199		3023.18	0.00534051		3553.17	0.01201464		4083.17	0.00263663
373.4	0.00788496		903.39	0.01463096		1433.39	0.01982552		1963.39	0.00941196		2493.38	0.01052785		3023.38	0.00487348		3553.37	0.01215911		4083.37	0.00208495
373.6	0.00869796		903.59	0.01436761		1433.59	0.02026302		1963.59	0.0096074		2493.58	0.01033998		3023.58	0.00509509		3553.57	0.01187108		4083.57	0.0023413
373.8	0.00882216		903.79	0.01467999		1433.79	0.02034059		1963.79	0.00943088		2493.78	0.01041362		3023.78	0.00519325		3553.77	0.01165491		4083.77	0.00152657
374	0.00888899		903.99	0.01426908		1433.99	0.02051738		1963.99	0.00836201		2493.98	0.0111499		3023.98	0.00479139		3553.97	0.01174482		4083.97	0.00100639
374.2	0.0092494		904.19	0.0141203		1434.19	0.02038976		1964.19	0.00742089		2494.18	0.01116056		3024.18	0.0046504		3554.17	0.01129339		4084.17	0.00132034
374.4	0.00994057		904.39	0.0132435		1434.39	0.01971838		1964.39	0.00701938		2494.38	0.01035614		3024.38	0.00457544		3554.37	0.01029499		4084.37	0.00107098
374.6	0.0097906		904.59	0.01337702		1434.59	0.01954256		1964.59	0.00619377		2494.58	0.00948769		3024.58	0.0045614		3554.57	0.01018778		4084.57	0.00131946
374.8	0.00951862		904.79	0.01276174		1434.79	0.01985502		1964.79	0.00616664		2494.78	0.00887546		3024.78	0.00495909		3554.77	0.0106792		4084.77	0.00208024
375	0.00976292		904.99	0.01207132		1434.99	0.01937849		1964.99	0.00548307		2494.98	0.0077057		3024.98	0.00588344		3554.97	0.0107934		4084.97	0.00148476
375.2	0.00939058		905.19	0.01263232		1435.19	0.01916786		1965.19	0.00452866		2495.18	0.00709862		3025.18	0.00653986		3555.17	0.01067769		4085.17	0.00084661
375.4	0.00927959		905.39	0.0130917		1435.39	0.01916571		1965.39	0.00363691		2495.38	0.00643621		3025.38	0.00647758		3555.37	0.01024897		4085.37	0.00140923
375.6	0.00875166		905.59	0.01294617		1435.59	0.01931192		1965.59	0.00370114		2495.58	0.00552581		3025.58	0.00703098		3555.57	0.01086738		4085.57	0.0011419
375.8	0.00881958		905.79	0.01318694		1435.79	0.0205205		1965.79	0.00387668		2495.78	0.00529121		3025.78	0.00683669		3555.77	0.01087704		4085.77	0.00098442
376	0.00833093		905.99	0.01290604		1435.99	0.01979179		1965.99	0.00372994		2495.98	0.00538943		3025.98	0.00592803		3555.97	0.01048518		4085.97	0.00070975
376.2	0.00721888		906.19	0.01261348		1436.19	0.01908528		1966.19	0.00507511		2496.18	0.00556177		3026.18	0.0059713		3556.17	0.01012153		4086.17	0.00011498
376.4	0.00668267		906.39	0.01348077		1436.39	0.01995617		1966.39	0.00629582		2496.38	0.00590904		3026.38	0.00540003		3556.37	0.01121898		4086.37	-0.00072027
376.6	0.00646525		906.59	0.01464104		1436.59	0.01913729		1966.59	0.00726529		2496.58	0.00654089		3026.58	0.00475628		3556.57	0.01109458		4086.57	-0.00010685
376.8	0.00630691		906.79	0.01561165		1436.79	0.01959227		1966.79	0.00701446		2496.78	0.00700581		3026.78	0.00411391		3556.77	0.01067687		4086.77	0.00082724
377	0.00660038		906.99	0.01605253		1436.99	0.01887962		1966.99	0.00708558		2496.98	0.00673591		3026.98	0.00394022		3556.97	0.00948382		4086.97	0.00167442
377.2	0.00650619		907.19	0.01509393		1437.19	0.01973503		1967.19	0.00710455		2497.18	0.00676558		3027.18	0.00348661		3557.17	0.00900871		4087.17	0.00164254
377.4	0.00676466		907.39	0.01534808		1437.39	0.01981333		1967.39	0.00676492		2497.38	0.00649358		3027.38	0.003614		3557.37	0.00965268		4087.37	0.0015653
377.6	0.0070512		907.59	0.01552023		1437.59	0.01870904		1967.59	0.00736414		2497.58	0.006594		3027.58	0.00419428		3557.57	0.00924035		4087.57	0.00167346
377.8	0.00755673		907.79	0.01523285		1437.79	0.01776535		1967.79	0.00678198		2497.78	0.0070187		3027.78	0.00464048		3557.77	0.01002075		4087.77	0.00108784
378	0.00855752		907.99	0.01427701		1437.99	0.01701996		1967.99	0.00624211		2497.98	0.00758749		3027.98	0.00456423		3557.97	0.01030251		4087.97	0.00107283
378.2	0.00919445		908.19	0.01397793		1438.19	0.01585937		1968.19	0.00602182		2498.18	0.00724016		3028.18	0.00522757		3558.17	0.00996472		4088.17	0.00116122
378.4	0.01025889		908.39	0.01319826		1438.39	0.01554936		1968.39	0.00587414		2498.38	0.00648845		3028.38	0.00526192		3558.37	0.01052571		4088.37	0.00070446
378.6	0.01085847		908.59	0.01288726		1438.59	0.01548898		1968.59	0.00598069		2498.58	0.00636768		3028.58	0.0055362		3558.57	0.01113709		4088.57	0.00076379
378.8	0.01115572		908.79	0.01294149		1438.79	0.01568203		1968.79	0.00649049		2498.78	0.00592122		3028.78	0.006453		3558.77	0.01159003		4088.77	0.00077494
379	0.01207842		908.99	0.01331437		1438.99	0.01568274		1968.99	0.00578275		2498.98	0.00546664		3028.98	0.00682297		3558.97	0.01174722		4088.97	0.0004752
379.2	0.01286872		909.19	0.01432444		1439.19	0.01640327		1969.19	0.00555224		2499.18	0.00582148		3029.18	0.00720026		3559.17	0.01170061		4089.17	0.00066775
379.4	0.01390755		909.39	0.01450542		1439.39	0.01729038		1969.39	0.00607068		2499.38	0.00587697		3029.38	0.00669569		3559.37	0.01171942		4089.37	0.00133351
379.6	0.01446182		909.59	0.01467011		1439.59	0.01855917		1969.59	0.00620877		2499.58	0.00571855		3029.58	0.00720504		3559.57	0.01157699		4089.57	0.00157466
379.8	0.01537781		909.79	0.01546292		1439.79	0.01960208		1969.79	0.00581268		2499.78	0.0061653		3029.78	0.0067819		3559.77	0.01128566		4089.77	0.0017495
380	0.01537781		909.99	0.01546292		1439.99	0.01960208		1969.98	0.00581268		2499.98	0.0061653		3029.97	0.0067819		3559.97	0.01128566		4089.97	0.0017495
380.2	0.01587406		910.19	0.0147761		1440.19	0.01924082		1970.18	0.00502054		2500.18	0.00684033		3030.17	0.00602973		3560.17	0.01150138		4090.17	0.00198582
380.4	0.01603599		910.39	0.01465303		1440.39	0.01877657		1970.38	0.00459374		2500.38	0.00789142		3030.37	0.00616551		3560.37	0.01150266		4090.37	0.00297277
380.6	0.01623604		910.59	0.01372362		1440.59	0.01875433		1970.58	0.00474519		2500.58	0.00910492		3030.57	0.00552072		3560.57	0.01135636		4090.57	0.00366278
380.8	0.0167732		910.79	0.01330723		1440.79	0.0181697		1970.78	0.00475681		2500.78	0.00996122		3030.77	0.00585901		3560.77	0.0117368		4090.77	0.00397753
381	0.0167328		910.99	0.01223808		1440.99	0.01771524		1970.98	0.00506987		2500.98	0.01035408		3030.97	0.00579107		3560.97	0.01123393		4090.97	0.00442995
381.2	0.01698817		911.19	0.01218563		1441.19	0.01765681		1971.18	0.00470322		2501.18	0.01074804		3031.17	0.00512285		3561.17	0.01079993		4091.17	0.00401458
381.4	0.01711274		911.39	0.01216661		1441.39	0.01673782		1971.38	0.00512862		2501.38	0.01057032		3031.37	0.0048832		3561.37	0.01103453		4091.37	0.00418323
381.6	0.0165654		911.59	0.01220672		1441.59	0.01632409		1971.58	0.00530965		2501.58	0.00998193		3031.57	0.0043142		3561.57	0.01088739		4091.57	0.00417217
381.8	0.016377		911.79	0.0121456		1441.79	0.01624371		1971.78	0.00570566		2501.78	0.00909867		3031.77	0.00428973		3561.77	0.01107815		4091.77	0.00487705
382	0.01648357		911.99	0.01195075		1441.99	0.0162257		1971.98	0.00677099		2501.98	0.00898975		3031.97	0.00470304		3561.97	0.0108132		4091.97	0.00443864
382.2	0.01495469		912.19	0.01226307		1442.19	0.01728432		1972.18	0.00736284		2502.18	0.00861406		3032.17	0.00493994		3562.17	0.0095126		4092.17	0.00357815
382.4	0.01431507		912.39	0.01241777		1442.39	0.01634944		1972.38	0.00705212		2502.38	0.00832991		3032.37	0.00467374		3562.37	0.00977867		4092.37	0.00410597
382.6	0.01401682		912.59	0.01221575		1442.59	0.01627036		1972.58	0.00720533		2502.58	0.00734916		3032.57	0.00497313		3562.57	0.01030451		4092.57	0.00383491
382.8	0.01461523		912.79	0.01256555		1442.79	0.01617432		1972.78	0.0078806		2502.78	0.00666898		3032.77	0.00463639		3562.77	0.01055881		4092.77	0.0035451
383	0.01419633		912.99	0.0120983		1442.99	0.01607847		1972.98	0.00786961		2502.98	0.00668011		3032.97	0.00582716		3562.97	0.0106618		4092.97	0.00327648
383.2	0.01518105		913.19	0.01177235		1443.19	0.0156987		1973.18	0.00731144		2503.18	0.00565841		3033.17	0.00721166		3563.17	0.0108005		4093.17	0.0046623
383.4	0.0161267		913.39	0.01083285		1443.39	0.01606241		1973.38	0.00672493		2503.38	0.00598317		3033.37	0.00792245		3563.37	0.01089675		4093.37	0.00499765
383.6	0.01623174		913.59	0.01003412		1443.59	0.01563068		1973.58	0.00700611		2503.58	0.00512759		3033.57	0.00774279		3563.57	0.01089463		4093.57	0.00557632
383.8	0.01661482		913.79	0.00909792		1443.79	0.0149899		1973.78	0.00655766		2503.78	0.00543562		3033.77	0.00819852		3563.77	0.01158068		4093.77	0.00574577
384	0.01684576		913.99	0.00812557		1443.99	0.01496111		1973.98	0.00633855		2503.98	0.00580084		3033.97	0.00853666		3563.97	0.0126638		4093.97	0.00531858
384.2	0.01666434		914.19	0.0077225		1444.19	0.01548446		1974.18	0.00492319		2504.18	0.00587554		3034.17	0.00843873		3564.17	0.012277		4094.17	0.00552368
384.4	0.01658847		914.39	0.00772103		1444.39	0.01538538		1974.38	0.00462807		2504.38	0.00651429		3034.37	0.00878259		3564.37	0.01295489		4094.37	0.00659896
384.6	0.01672253		914.59	0.00683161		1444.59	0.01536818		1974.58	0.00493878		2504.58	0.00652321		3034.57	0.00823436		3564.57	0.01354339		4094.57	0.00674249
384.8	0.01685022		914.79	0.00710831		1444.79	0.01429749		1974.78	0.00567888		2504.78	0.00796821		3034.77	0.00862302		3564.77	0.0143381		4094.77	0.00643414
385	0.0165283		914.99	0.00750104		1444.99	0.01461485		1974.98	0.00639189		2504.98	0.00806869		3034.97	0.00763984		3564.97	0.01412904		4094.97	0.00665417
385.2	0.01737112		915.19	0.00866925		1445.19	0.01496078		1975.18	0.00608638		2505.18	0.00912164		3035.17	0.00688011		3565.17	0.01443378		4095.17	0.00555123
385.4	0.01792043		915.39	0.00958781		1445.39	0.01394121		1975.38	0.00695944		2505.38	0.00924692		3035.37	0.00630089		3565.37	0.01545798		4095.37	0.00593666
385.6	0.01742502		915.59	0.00994598		1445.59	0.01435916		1975.58	0.00735001		2505.58	0.00922914		3035.57	0.00533918		3565.57	0.01589231		4095.57	0.00628427
385.8	0.01759691		915.79	0.00940698		1445.79	0.01456739		1975.78	0.00856013		2505.78	0.01001952		3035.77	0.00488567		3565.77	0.01595114		4095.77	0.00645986
386	0.01762723		915.99	0.00927768		1445.99	0.01524012		1975.98	0.00952184		2505.98	0.0112284		3035.97	0.00468152		3565.97	0.01550132		4095.97	0.00582167
386.2	0.01639761		916.19	0.01032021		1446.19	0.01623995		1976.18	0.00950412		2506.18	0.0110585		3036.17	0.00430416		3566.17	0.01488976		4096.17	0.00538465
386.4	0.01723455		916.39	0.0104038		1446.39	0.01620055		1976.38	0.00950734		2506.38	0.01096456		3036.37	0.00409226		3566.37	0.01513037		4096.37	0.00603027
386.6	0.0167399		916.59	0.01108755		1446.59	0.01560156		1976.58	0.00962861		2506.58	0.01034444		3036.57	0.00438773		3566.57	0.01517198		4096.57	0.00584312
386.8	0.0165156		916.79	0.01104619		1446.79	0.01565493		1976.78	0.00945775		2506.78	0.00978484		3036.77	0.00409466		3566.77	0.01513743		4096.77	0.00671675
387	0.01649273		916.99	0.01106484		1446.99	0.01607785		1976.98	0.00872411		2506.98	0.00908228		3036.97	0.00487391		3566.97	0.01451653		4096.97	0.00800418
387.2	0.01643078		917.19	0.01099902		1447.19	0.01686797		1977.18	0.00881759		2507.18	0.00903452		3037.17	0.00505501		3567.17	0.01359176		4097.17	0.0075847
387.4	0.0169096		917.39	0.01164769		1447.39	0.01746444		1977.38	0.00880899		2507.38	0.00863784		3037.37	0.00486739		3567.37	0.01327256		4097.37	0.00681204
387.6	0.01628711		917.59	0.01144426		1447.59	0.01692267		1977.58	0.00884397		2507.58	0.00775468		3037.57	0.00514351		3567.57	0.01392752		4097.57	0.00685019
387.8	0.01614164		917.79	0.01048412		1447.79	0.01731603		1977.78	0.00792661		2507.78	0.00757714		3037.77	0.00613223		3567.77	0.01330756		4097.77	0.00633828
388	0.01671957		917.99	0.00990594		1447.99	0.01780054		1977.98	0.0063853		2507.98	0.00784316		3037.97	0.0063499		3567.97	0.01288493		4097.97	0.00606561
388.2	0.01675097		918.19	0.00978567		1448.19	0.01738418		1978.18	0.00501139		2508.18	0.00763924		3038.17	0.00622474		3568.17	0.01299169		4098.17	0.00733625
388.4	0.01599254		918.39	0.0097932		1448.39	0.01676405		1978.38	0.00494846		2508.38	0.00760407		3038.37	0.00617093		3568.37	0.01316673		4098.37	0.00740857
388.6	0.01573313		918.59	0.00949121		1448.59	0.01681961		1978.58	0.0053688		2508.58	0.00825367		3038.57	0.0055754		3568.57	0.01307224		4098.57	0.0067106
388.8	0.01534457		918.79	0.00996404		1448.79	0.0162739		1978.78	0.00565033		2508.78	0.00933216		3038.77	0.00631365		3568.77	0.01265232		4098.77	0.00653666
389	0.01592525		918.99	0.01075226		1448.99	0.01688037		1978.98	0.0057807		2508.98	0.00877903		3038.97	0.00582472		3568.97	0.0118135		4098.97	0.00654256
389.2	0.01646698		919.19	0.01003645		1449.19	0.01711592		1979.18	0.00546652		2509.18	0.00909023		3039.17	0.00577803		3569.17	0.01138334		4099.17	0.0047417
389.4	0.01658563		919.39	0.00962558		1449.39	0.01643114		1979.38	0.00608517		2509.38	0.00914207		3039.37	0.00479685		3569.37	0.01116817		4099.37	0.00393467
389.6	0.01566238		919.59	0.00898891		1449.59	0.01682604		1979.58	0.00583639		2509.58	0.00876872		3039.57	0.00486313		3569.57	0.01102978		4099.57	0.00416557
389.8	0.0149009		919.79	0.00934075		1449.79	0.01678049		1979.78	0.00564148		2509.78	0.00890052		3039.77	0.00513386		3569.77	0.01081197		4099.77	0.00380676
390	0.01468458		919.99	0.0096899		1449.99	0.01804592		1979.98	0.00516278		2509.98	0.0087109		3039.97	0.00519201		3569.97	0.01145061		4099.97	0.00379818
390.2	0.01463059		920.19	0.01013414		1450.19	0.01824408		1980.18	0.00476009		2510.18	0.00872166		3040.17	0.00521893		3570.17	0.0113682		4100.17	0.00321651
390.4	0.01488265		920.39	0.01007744		1450.39	0.0182239		1980.38	0.0048691		2510.38	0.00877017		3040.37	0.0050402		3570.37	0.01192582		4100.37	0.00369517
390.6	0.01448824		920.59	0.01066157		1450.59	0.01771726		1980.58	0.00462042		2510.58	0.00809069		3040.57	0.00566434		3570.57	0.01200401		4100.57	0.00361578
390.8	0.01486982		920.79	0.01029323		1450.79	0.01794178		1980.78	0.00451711		2510.78	0.00739695		3040.77	0.00524125		3570.77	0.01195317		4100.77	0.00415893
391	0.01561699		920.99	0.01009544		1450.99	0.018016		1980.98	0.00411786		2510.98	0.00728587		3040.97	0.00603159		3570.97	0.01136029		4100.97	0.00408658
391.2	0.01542834		921.19	0.00985722		1451.19	0.01784992		1981.18	0.00402391		2511.18	0.00724463		3041.17	0.00658728		3571.17	0.01117741		4101.17	0.00366077
391.4	0.01580775		921.39	0.0105794		1451.39	0.01794838		1981.38	0.00381908		2511.38	0.00575878		3041.37	0.0071598		3571.37	0.01152101		4101.37	0.00470398
391.6	0.01558144		921.59	0.00992081		1451.59	0.01768132		1981.58	0.00330247		2511.58	0.00572099		3041.57	0.00758651		3571.57	0.0115983		4101.57	0.00529539
391.8	0.0159298		921.79	0.00886139		1451.79	0.01732893		1981.78	0.00256491		2511.78	0.00657623		3041.77	0.00742956		3571.77	0.01174289		4101.77	0.00590278
392	0.01677046		921.99	0.00905709		1451.99	0.01633021		1981.98	0.00282171		2511.98	0.00718757		3041.97	0.00714448		3571.97	0.01253336		4101.97	0.00700674
392.2	0.01693945		922.19	0.00935553		1452.19	0.01575324		1982.18	0.00317735		2512.18	0.007248		3042.17	0.00747785		3572.17	0.01344402		4102.17	0.00701489
392.4	0.01589981		922.39	0.00914199		1452.39	0.01610597		1982.38	0.00300161		2512.38	0.00793955		3042.37	0.00732816		3572.37	0.01351877		4102.37	0.00670068
392.6	0.01678133		922.59	0.00940482		1452.59	0.01637694		1982.58	0.00243745		2512.58	0.00864206		3042.57	0.00692674		3572.57	0.01425004		4102.57	0.00667132
392.8	0.01656206		922.79	0.01020521		1452.79	0.01653154		1982.78	0.002571		2512.78	0.00837438		3042.77	0.00770742		3572.77	0.01364514		4102.77	0.00703795
393	0.01625758		922.99	0.01034875		1452.99	0.01685379		1982.98	0.00317259		2512.98	0.00767095		3042.97	0.00739431		3572.97	0.01318517		4102.97	0.00643828
393.2	0.01605888		923.19	0.00857401		1453.19	0.0170614		1983.18	0.00291243		2513.18	0.00779831		3043.17	0.00757854		3573.17	0.01299965		4103.17	0.00551952
393.4	0.01547323		923.39	0.00895143		1453.39	0.01624096		1983.38	0.0024591		2513.38	0.00848422		3043.37	0.00733379		3573.37	0.01321646		4103.37	0.00593818
393.6	0.01472883		923.59	0.00966858		1453.59	0.01638585		1983.58	0.00227054		2513.58	0.00792833		3043.57	0.00793793		3573.57	0.01397113		4103.57	0.00688746
393.8	0.01411007		923.79	0.0101341		1453.79	0.01683825		1983.78	0.00150512		2513.78	0.00817304		3043.77	0.00675188		3573.77	0.01397508		4103.77	0.00604743
394	0.014293		923.99	0.0093747		1453.99	0.01720427		1983.98	0.00157848		2513.98	0.00814635		3043.97	0.00620958		3573.97	0.01443841		4103.97	0.00534753
394.2	0.01425086		924.19	0.00921839		1454.19	0.0160851		1984.18	0.00158		2514.18	0.0086772		3044.17	0.00591057		3574.17	0.01414676		4104.17	0.00535429
394.4	0.0137548		924.39	0.00935807		1454.39	0.01625561		1984.38	0.00231915		2514.38	0.00814371		3044.37	0.00601609		3574.37	0.01458678		4104.37	0.00582881
394.6	0.0135196		924.59	0.00890498		1454.59	0.01590881		1984.58	0.00181512		2514.58	0.00827251		3044.57	0.0060533		3574.57	0.01393193		4104.57	0.00594961
394.8	0.01389583		924.79	0.00875608		1454.79	0.01490801		1984.78	0.00221198		2514.78	0.00808019		3044.77	0.00584119		3574.77	0.01526986		4104.77	0.00592463
395	0.01387992		924.99	0.00791997		1454.99	0.01453216		1984.98	0.00200102		2514.98	0.00805349		3044.97	0.00628298		3574.97	0.01502109		4104.97	0.00652577
395.2	0.01225734		925.19	0.00884368		1455.19	0.01302412		1985.18	0.00204		2515.18	0.00720694		3045.17	0.0067683		3575.17	0.01475721		4105.17	0.0070781
395.4	0.01174911		925.39	0.01004514		1455.39	0.01297164		1985.38	0.00295113		2515.38	0.0069938		3045.37	0.00710418		3575.37	0.01434664		4105.37	0.00689996
395.6	0.01175212		925.59	0.00999463		1455.59	0.01237632		1985.58	0.00346537		2515.58	0.00733937		3045.57	0.00726887		3575.57	0.0145918		4105.57	0.00679967
395.8	0.01212351		925.79	0.00997317		1455.79	0.012024		1985.78	0.00455468		2515.78	0.00768599		3045.77	0.00648154		3575.77	0.01487614		4105.77	0.00637559
396	0.01257859		925.99	0.01117117		1455.99	0.01250102		1985.98	0.00537253		2515.98	0.00779489		3045.97	0.00701886		3575.97	0.01485659		4105.97	0.00640624
396.2	0.01300315		926.19	0.01169123		1456.19	0.01356272		1986.18	0.00440909		2516.18	0.00867486		3046.17	0.00728293		3576.17	0.01475611		4106.17	0.00575733
396.4	0.01290242		926.39	0.01170785		1456.39	0.01479851		1986.38	0.00392215		2516.38	0.00796254		3046.37	0.00774019		3576.37	0.01456076		4106.37	0.00597666
396.6	0.0143865		926.59	0.012059		1456.59	0.01581707		1986.58	0.00389238		2516.58	0.00723729		3046.57	0.00726268		3576.57	0.01384434		4106.57	0.00635897
396.8	0.01434347		926.79	0.01195454		1456.79	0.01691628		1986.78	0.00381141		2516.78	0.00619134		3046.77	0.00786889		3576.77	0.01296633		4106.77	0.00703846
397	0.01438664		926.99	0.01104395		1456.99	0.01769891		1986.98	0.00412506		2516.98	0.00515945		3046.97	0.0078821		3576.97	0.01245725		4106.97	0.00707001
397.2	0.01528757		927.19	0.00966349		1457.19	0.01791533		1987.18	0.00391002		2517.18	0.00559773		3047.17	0.00758161		3577.17	0.0120457		4107.17	0.00703707
397.4	0.0143659		927.39	0.0102163		1457.39	0.01820957		1987.38	0.004069		2517.38	0.0051725		3047.37	0.00746607		3577.37	0.01225		4107.37	0.00655897
397.6	0.01468137		927.59	0.00991397		1457.59	0.01909141		1987.58	0.00435014		2517.58	0.00470262		3047.57	0.00722252		3577.57	0.01209089		4107.57	0.00618021
397.8	0.01427497		927.79	0.00999308		1457.79	0.0193325		1987.78	0.00444181		2517.78	0.00379579		3047.77	0.00686937		3577.77	0.01186026		4107.77	0.00550477
398	0.01444589		927.99	0.00972954		1457.99	0.01893286		1987.98	0.00435083		2517.98	0.00362575		3047.97	0.00787039		3577.97	0.01245795		4107.97	0.00613465
398.2	0.01405631		928.19	0.01002993		1458.19	0.01924991		1988.18	0.00469028		2518.18	0.00354823		3048.17	0.00758327		3578.17	0.01232583		4108.17	0.00627312
398.4	0.01300413		928.39	0.00992009		1458.39	0.0197232		1988.38	0.00474115		2518.38	0.00325848		3048.37	0.00767882		3578.37	0.01306366		4108.37	0.00614194
398.6	0.01283307		928.59	0.00921495		1458.59	0.01846737		1988.58	0.00487178		2518.58	0.00395798		3048.57	0.00788147		3578.57	0.01401559		4108.57	0.00588299
398.8	0.01240571		928.79	0.00984034		1458.79	0.01814122		1988.78	0.00560707		2518.78	0.00420277		3048.77	0.00770091		3578.77	0.01517115		4108.77	0.00538177
399	0.01174825		928.99	0.01068797		1458.99	0.01826731		1988.98	0.00525356		2518.98	0.00469983		3048.97	0.0077927		3578.97	0.01397447		4108.97	0.00495522
399.2	0.0115152		929.19	0.01163201		1459.19	0.01699642		1989.18	0.00495997		2519.18	0.00510399		3049.17	0.00826811		3579.17	0.013575		4109.17	0.0043399
399.4	0.01158098		929.39	0.0118929		1459.39	0.0175177		1989.38	0.00561356		2519.38	0.00642194		3049.37	0.00773673		3579.37	0.01384137		4109.37	0.00443368
399.6	0.01192649		929.59	0.0114661		1459.59	0.01649086		1989.58	0.0055183		2519.58	0.00675279		3049.57	0.00698939		3579.57	0.01380564		4109.57	0.0044254
399.8	0.01244816		929.79	0.01116918		1459.79	0.01599733		1989.78	0.00539293		2519.78	0.00775276		3049.77	0.00592415		3579.77	0.01370445		4109.77	0.00423343
400	0.01323042		929.99	0.01183203		1459.99	0.01606701		1989.98	0.00540965		2519.98	0.00856379		3049.97	0.00590423		3579.97	0.01312572		4109.97	0.00474822
400.2	0.01379954		930.19	0.01199991		1460.19	0.01637945		1990.18	0.00416311		2520.18	0.0093738		3050.17	0.00575802		3580.17	0.01222086		4110.17	0.00527207
400.4	0.01491545		930.39	0.01170722		1460.39	0.01574527		1990.38	0.00484996		2520.38	0.00870243		3050.37	0.00561409		3580.37	0.01148081		4110.37	0.00549219
400.6	0.01620132		930.59	0.01187707		1460.59	0.0159442		1990.58	0.00460317		2520.58	0.00805876		3050.57	0.005355		3580.57	0.01138307		4110.57	0.00600307
400.8	0.0164146		930.79	0.01212984		1460.79	0.01583594		1990.78	0.00476187		2520.78	0.00803032		3050.77	0.00542328		3580.77	0.01113623		4110.77	0.00680684
401	0.01703959		930.99	0.0115708		1460.99	0.01537999		1990.98	0.00600047		2520.98	0.00760863		3050.97	0.00567531		3580.97	0.01119152		4110.97	0.00630836
401.2	0.01657971		931.19	0.01074395		1461.19	0.01499407		1991.18	0.00622869		2521.18	0.00715974		3051.17	0.00590085		3581.17	0.01119361		4111.17	0.00576323
401.4	0.01564173		931.39	0.010254		1461.39	0.01550346		1991.38	0.00716085		2521.38	0.00618088		3051.37	0.00572497		3581.37	0.01158826		4111.37	0.00585234
401.6	0.01618568		931.59	0.01003971		1461.59	0.01531629		1991.58	0.00725841		2521.58	0.00590387		3051.57	0.00649595		3581.57	0.01262164		4111.57	0.00623675
401.8	0.01588563		931.79	0.00974637		1461.79	0.01468623		1991.78	0.00757706		2521.78	0.00466724		3051.77	0.00692384		3581.77	0.01292928		4111.77	0.00610593
402	0.01518205		931.99	0.00835573		1461.99	0.01377628		1991.98	0.00689177		2521.98	0.00453114		3051.97	0.00645762		3581.97	0.01332227		4111.97	0.00668484
402.2	0.01407738		932.19	0.00794864		1462.19	0.0138473		1992.18	0.0070317		2522.18	0.0040501		3052.17	0.00625756		3582.17	0.01342945		4112.17	0.00577583
402.4	0.01323633		932.39	0.00694209		1462.39	0.01326637		1992.38	0.00730434		2522.38	0.00436042		3052.37	0.00598068		3582.37	0.01401623		4112.37	0.00646674
402.6	0.01334277		932.59	0.00721142		1462.59	0.01299004		1992.58	0.00781054		2522.58	0.00413174		3052.57	0.00657611		3582.57	0.01394405		4112.57	0.00616025
402.8	0.01309316		932.79	0.00736639		1462.79	0.01410899		1992.78	0.00753335		2522.78	0.00441139		3052.77	0.00590387		3582.77	0.01338231		4112.77	0.00526936
403	0.0123658		932.99	0.00643884		1462.99	0.01430281		1992.98	0.00668695		2522.98	0.00491323		3052.97	0.00564765		3582.97	0.01322874		4112.97	0.00503088
403.2	0.01248391		933.19	0.00623902		1463.19	0.0140071		1993.18	0.00541437		2523.18	0.00461625		3053.17	0.00527031		3583.17	0.01337554		4113.17	0.00542505
403.4	0.01195904		933.39	0.0057712		1463.39	0.0154813		1993.38	0.00476281		2523.38	0.00541104		3053.37	0.00431404		3583.37	0.0132591		4113.37	0.00635699
403.6	0.01266319		933.59	0.00542314		1463.59	0.01469422		1993.58	0.00349858		2523.58	0.00651631		3053.57	0.00365907		3583.57	0.01188588		4113.57	0.00573647
403.8	0.0129073		933.79	0.00616554		1463.79	0.01516046		1993.78	0.00294418		2523.78	0.00777747		3053.77	0.00319766		3583.77	0.01172042		4113.77	0.00597341
404	0.01297437		933.99	0.00773471		1463.99	0.01544391		1993.98	0.00309205		2523.98	0.00800494		3053.97	0.00293657		3583.97	0.01080454		4113.97	0.0062128
404.2	0.01343375		934.19	0.00891619		1464.19	0.01587281		1994.18	0.00207051		2524.18	0.00886034		3054.17	0.00353482		3584.17	0.00972611		4114.17	0.00557747
404.4	0.01472484		934.39	0.00973877		1464.39	0.01547692		1994.38	0.00281067		2524.38	0.00876328		3054.37	0.00323878		3584.37	0.00918447		4114.37	0.00510412
404.6	0.01559167		934.59	0.01091907		1464.59	0.01616925		1994.58	0.0026757		2524.58	0.00873961		3054.57	0.00354127		3584.57	0.00931867		4114.57	0.00524557
404.8	0.01633602		934.79	0.01179005		1464.79	0.01575498		1994.78	0.00343641		2524.78	0.00845162		3054.77	0.0027815		3584.77	0.0091156		4114.77	0.00567213
405	0.01670173		934.99	0.01168758		1464.99	0.01595787		1994.98	0.0045195		2524.98	0.00766419		3054.97	0.00341195		3584.97	0.00979656		4114.97	0.0048553
405.2	0.01607878		935.19	0.01133054		1465.19	0.01646714		1995.18	0.0045052		2525.18	0.00700701		3055.17	0.00346532		3585.17	0.01012712		4115.17	0.00445757
405.4	0.01701867		935.39	0.01169393		1465.39	0.01660762		1995.38	0.00455102		2525.38	0.00651451		3055.37	0.00359971		3585.37	0.01073325		4115.37	0.00473281
405.6	0.0165302		935.59	0.01206422		1465.59	0.0156121		1995.58	0.00404112		2525.58	0.0057571		3055.57	0.0041949		3585.57	0.01164279		4115.57	0.0039609
405.8	0.01625034		935.79	0.01213652		1465.79	0.01474947		1995.78	0.00379624		2525.78	0.00531528		3055.77	0.00395792		3585.77	0.01115133		4115.77	0.00502379
406	0.01535798		935.99	0.01174282		1465.99	0.01299911		1995.98	0.00337282		2525.98	0.00461401		3055.97	0.00361654		3585.97	0.01231644		4115.97	0.00616461
406.2	0.01544029		936.19	0.01139		1466.19	0.01248967		1996.18	0.00291612		2526.18	0.00521007		3056.17	0.00416552		3586.17	0.01224301		4116.17	0.00642228
406.4	0.01475834		936.39	0.01184712		1466.39	0.01197365		1996.38	0.00393569		2526.38	0.00515703		3056.37	0.00345552		3586.37	0.0119477		4116.37	0.00760389
406.6	0.01411154		936.59	0.01193927		1466.59	0.01213423		1996.58	0.00328966		2526.58	0.00407333		3056.57	0.00429755		3586.57	0.01248026		4116.57	0.0072083
406.8	0.0128372		936.79	0.01088028		1466.79	0.01238547		1996.78	0.0033688		2526.78	0.00349272		3056.77	0.00377981		3586.77	0.01290204		4116.77	0.00798459
407	0.01185852		936.99	0.01053341		1466.99	0.01245004		1996.98	0.00308461		2526.98	0.00304341		3056.97	0.00389273		3586.97	0.01247936		4116.97	0.00879678
407.2	0.01250473		937.19	0.01072469		1467.19	0.01336121		1997.18	0.0025679		2527.18	0.00306316		3057.17	0.00360259		3587.17	0.01316325		4117.17	0.00860296
407.4	0.01256417		937.39	0.01048235		1467.39	0.01453357		1997.38	0.00319037		2527.38	0.00373063		3057.37	0.00351286		3587.37	0.01206273		4117.37	0.00884403
407.6	0.01290761		937.59	0.00973653		1467.59	0.0138401		1997.58	0.00416232		2527.58	0.0042463		3057.57	0.00366722		3587.57	0.01159125		4117.57	0.00872637
407.8	0.01298108		937.79	0.0099868		1467.79	0.01466049		1997.78	0.00575985		2527.78	0.00419548		3057.77	0.00366116		3587.77	0.01203205		4117.77	0.00877079
408	0.01287879		937.99	0.00988237		1467.99	0.01426978		1997.98	0.0060685		2527.98	0.00410049		3057.97	0.00374851		3587.97	0.01109998		4117.97	0.00815656
408.2	0.0134963		938.19	0.01005871		1468.19	0.01409413		1998.18	0.00676353		2528.18	0.00530369		3058.17	0.0041062		3588.17	0.00995114		4118.17	0.00758131
408.4	0.01372179		938.39	0.01004786		1468.39	0.01445333		1998.38	0.00778315		2528.38	0.00553576		3058.37	0.00350817		3588.37	0.00936831		4118.37	0.00720598
408.6	0.0138965		938.59	0.00897691		1468.59	0.01468266		1998.58	0.00867032		2528.58	0.00515527		3058.57	0.00301546		3588.57	0.00942518		4118.57	0.00738343
408.8	0.01457583		938.79	0.00812573		1468.79	0.01455921		1998.78	0.0089853		2528.78	0.00416992		3058.77	0.00315862		3588.77	0.00886535		4118.77	0.00695889
409	0.01459208		938.99	0.00772027		1468.99	0.01479086		1998.98	0.00842528		2528.98	0.00450549		3058.97	0.00377564		3588.97	0.00846293		4118.97	0.00688186
409.2	0.01471101		939.19	0.00717088		1469.19	0.01442091		1999.18	0.00730881		2529.18	0.00489685		3059.17	0.00395159		3589.17	0.00814729		4119.17	0.00656173
409.4	0.01420926		939.39	0.00647484		1469.39	0.01421987		1999.38	0.00613127		2529.38	0.00575221		3059.37	0.00311765		3589.37	0.00767026		4119.37	0.00703159
409.6	0.01296728		939.59	0.00638906		1469.59	0.0136399		1999.58	0.00569123		2529.58	0.00513385		3059.57	0.0028935		3589.57	0.00743131		4119.57	0.0066899
409.8	0.01227127		939.79	0.00633709		1469.79	0.01325607		1999.78	0.0049956		2529.78	0.00585862		3059.77	0.00305035		3589.77	0.00720005		4119.77	0.00764647
410	0.01106429		939.99	0.00520938		1469.99	0.01255686		1999.98	0.00390273		2529.98	0.00549207		3059.97	0.00339451		3589.97	0.00763808		4119.97	0.00755317
410.2	0.01071506		940.19	0.00471563		1470.19	0.01312297		2000.18	0.00349288		2530.18	0.00617794		3060.17	0.0032278		3590.17	0.00741852		4120.17	0.00747903
410.4	0.00990256		940.39	0.0052879		1470.39	0.01359826		2000.38	0.00337726		2530.38	0.00537301		3060.37	0.00281137		3590.37	0.00770639		4120.37	0.00772005
410.6	0.01006182		940.59	0.00489869		1470.59	0.01359919		2000.58	0.00281459		2530.58	0.0049252		3060.57	0.00390341		3590.57	0.00826292		4120.57	0.00649688
410.8	0.01017678		940.79	0.00525852		1470.79	0.01351145		2000.78	0.00225579		2530.78	0.00471		3060.77	0.00419379		3590.77	0.00852804		4120.77	0.00599503
411	0.01136292		940.99	0.00593995		1470.99	0.01428772		2000.98	0.00173487		2530.98	0.00453595		3060.97	0.00472495		3590.97	0.00864445		4120.97	0.00468099
411.2	0.01166785		941.19	0.00592671		1471.19	0.01418707		2001.18	0.00164286		2531.18	0.00421279		3061.17	0.00478232		3591.17	0.0096569		4121.17	0.00446931
411.4	0.01210863		941.39	0.00615151		1471.39	0.01459316		2001.38	0.00271587		2531.38	0.00372707		3061.37	0.00489759		3591.37	0.00871015		4121.37	0.00445031
411.6	0.01248328		941.59	0.00611098		1471.59	0.01482667		2001.58	0.00285744		2531.58	0.00381857		3061.57	0.0047647		3591.57	0.00996211		4121.57	0.00450941
411.8	0.01280964		941.79	0.00713515		1471.79	0.01503856		2001.78	0.00317269		2531.78	0.00432237		3061.77	0.0038748		3591.77	0.01077733		4121.77	0.00430999
412	0.01275366		941.99	0.00777624		1471.99	0.0152557		2001.98	0.00286293		2531.98	0.00494178		3061.97	0.00329835		3591.97	0.01063721		4121.97	0.00384902
412.2	0.01215223		942.19	0.0081549		1472.19	0.01503493		2002.18	0.0041506		2532.18	0.00526413		3062.17	0.00243989		3592.17	0.01139085		4122.17	0.00376594
412.4	0.01289274		942.39	0.00857003		1472.39	0.01586318		2002.38	0.00414762		2532.38	0.00514204		3062.37	0.00109583		3592.37	0.01095654		4122.37	0.00373747
412.6	0.01356454		942.59	0.00794184		1472.59	0.01548266		2002.58	0.00365052		2532.58	0.00515313		3062.57	0.00040438		3592.57	0.0112167		4122.57	0.00484124
412.8	0.01412124		942.79	0.00858344		1472.79	0.01498438		2002.78	0.00328676		2532.78	0.00537799		3062.77	0.00089654		3592.77	0.0102054		4122.77	0.00455458
413	0.01466084		942.99	0.00906079		1472.99	0.01454531		2002.98	0.00304624		2532.98	0.0050219		3062.97	0.00004746		3592.97	0.01093045		4122.97	0.00459315
413.2	0.01420431		943.19	0.00900334		1473.19	0.01358679		2003.18	0.00360793		2533.18	0.00511598		3063.17	-0.0001099		3593.17	0.01071749		4123.17	0.00422325
413.4	0.01296558		943.39	0.00858498		1473.39	0.01313251		2003.38	0.00354864		2533.38	0.00531387		3063.37	-0.0004764		3593.37	0.01010537		4123.37	0.00417896
413.6	0.01262256		943.59	0.00937868		1473.59	0.01275364		2003.58	0.00465175		2533.58	0.00415737		3063.57	0.00016204		3593.57	0.01058622		4123.57	0.00335795
413.8	0.01178501		943.79	0.00965697		1473.79	0.01221453		2003.78	0.00462273		2533.78	0.00487976		3063.77	0.00064805		3593.77	0.01086614		4123.77	0.00293603
414	0.01165566		943.99	0.00905348		1473.99	0.01224598		2003.98	0.00447575		2533.98	0.00431143		3063.97	0.00158024		3593.97	0.01148775		4123.97	0.00270879
414.2	0.01229778		944.19	0.00913081		1474.19	0.01196326		2004.18	0.00471121		2534.18	0.00369852		3064.17	0.00207917		3594.17	0.01141374		4124.17	0.00242244
414.4	0.01222942		944.39	0.00910041		1474.39	0.01159373		2004.38	0.0042623		2534.38	0.00306627		3064.37	0.00293342		3594.37	0.0117225		4124.37	0.0010663
414.6	0.0125427		944.59	0.00912932		1474.59	0.01132886		2004.58	0.00461116		2534.58	0.00306277		3064.57	0.00419143		3594.57	0.01093365		4124.57	-0.00000558
414.8	0.01231147		944.79	0.00935756		1474.79	0.01116665		2004.78	0.00361073		2534.78	0.00213953		3064.77	0.00517526		3594.77	0.01123425		4124.77	-0.00118505
415	0.01274403		944.99	0.00959599		1474.99	0.01186162		2004.98	0.0037667		2534.98	0.00113374		3064.97	0.00551961		3594.97	0.01129437		4124.97	-0.00156735
415.2	0.01196542		945.19	0.00860683		1475.19	0.01160989		2005.18	0.00353854		2535.18	0.00125417		3065.17	0.00555724		3595.17	0.01112595		4125.17	-0.0007513
415.4	0.01202362		945.39	0.00877461		1475.39	0.01229483		2005.38	0.00325296		2535.38	0.00121667		3065.37	0.00609074		3595.37	0.01031443		4125.37	-0.00091943
415.6	0.01146738		945.59	0.00904542		1475.59	0.01183567		2005.58	0.00193289		2535.58	0.00179762		3065.57	0.00602056		3595.57	0.0107917		4125.57	-0.00066003
415.8	0.01163066		945.79	0.00938616		1475.79	0.01249361		2005.78	0.00185038		2535.78	0.00223974		3065.77	0.00571182		3595.77	0.01038787		4125.77	0.00047779
416	0.01065285		945.99	0.00868615		1475.99	0.01349644		2005.98	0.00157239		2535.98	0.00233563		3065.97	0.00498551		3595.97	0.00996873		4125.97	0.00084572
416.2	0.01067721		946.19	0.00793799		1476.19	0.01333379		2006.18	0.00166564		2536.18	0.00229407		3066.17	0.00437898		3596.17	0.00980947		4126.17	0.00165611
416.4	0.01151737		946.39	0.00854811		1476.39	0.01419469		2006.38	0.00077794		2536.38	0.00279629		3066.37	0.00368266		3596.37	0.00889503		4126.37	0.00316818
416.6	0.01186702		946.59	0.00789639		1476.59	0.01412581		2006.58	0.0005457		2536.58	0.00273578		3066.57	0.00380131		3596.57	0.00893733		4126.57	0.00423946
416.8	0.01211536		946.79	0.00786466		1476.79	0.0140578		2006.78	0.00085015		2536.78	0.0027936		3066.77	0.00317856		3596.77	0.00859305		4126.77	0.00400348
417	0.01257366		946.99	0.00744081		1476.99	0.0137966		2006.98	0.00092575		2536.98	0.00232094		3066.97	0.0022945		3596.97	0.01005959		4126.97	0.00522652
417.2	0.01194176		947.19	0.0072004		1477.19	0.01361932		2007.18	0.00094913		2537.18	0.00320661		3067.17	0.00257211		3597.17	0.01032557		4127.17	0.00640291
417.4	0.01126993		947.39	0.00702094		1477.39	0.01422665		2007.38	0.00027972		2537.38	0.00405597		3067.37	0.00229467		3597.37	0.0107476		4127.37	0.00689685
417.6	0.01244214		947.59	0.00714819		1477.59	0.01412089		2007.58	0.00070468		2537.58	0.00412131		3067.57	0.00292025		3597.57	0.01234717		4127.57	0.00712271
417.8	0.01279868		947.79	0.00733859		1477.79	0.0142571		2007.78	0.0009467		2537.78	0.00520342		3067.77	0.00362187		3597.77	0.01249442		4127.77	0.00650122
418	0.0137814		947.99	0.00730827		1477.99	0.01458227		2007.98	0.00145865		2537.98	0.00534827		3067.97	0.0044045		3597.97	0.01276139		4127.97	0.00624378
418.2	0.01350778		948.19	0.00762503		1478.19	0.01466891		2008.18	0.0025339		2538.18	0.00538524		3068.17	0.00439362		3598.17	0.01283802		4128.17	0.00578785
418.4	0.01336937		948.39	0.0082087		1478.39	0.01517726		2008.38	0.00262215		2538.38	0.00523502		3068.37	0.00392741		3598.37	0.01345398		4128.37	0.00458311
418.6	0.01335529		948.59	0.00800339		1478.59	0.01527212		2008.58	0.00376002		2538.58	0.00509831		3068.57	0.00405591		3598.57	0.01324836		4128.57	0.00385239
418.8	0.0135708		948.79	0.00778499		1478.79	0.0155206		2008.78	0.00382435		2538.78	0.00498089		3068.77	0.00466009		3598.77	0.01287675		4128.77	0.00302185
419	0.01426552		948.99	0.007824		1478.99	0.0159753		2008.98	0.00381977		2538.98	0.00575532		3068.97	0.00403817		3598.97	0.01278304		4128.97	0.00336349
419.2	0.01371146		949.19	0.007082		1479.19	0.01581307		2009.18	0.00383731		2539.18	0.0060107		3069.17	0.00370193		3599.17	0.01241139		4129.17	0.00372138
419.4	0.01286021		949.39	0.00756162		1479.39	0.01589674		2009.38	0.00394335		2539.38	0.00651005		3069.37	0.00374851		3599.37	0.01175131		4129.37	0.00327959
419.6	0.01274266		949.59	0.00775897		1479.59	0.01576078		2009.58	0.00363185		2539.58	0.00721967		3069.57	0.00291145		3599.57	0.01138164		4129.57	0.00399104
419.8	0.01264699		949.79	0.00792856		1479.79	0.01677328		2009.78	0.00399048		2539.78	0.00644682		3069.77	0.00295725		3599.77	0.01140067		4129.77	0.00494084
420	0.01157965		949.99	0.00710094		1479.99	0.01661212		2009.98	0.00384029		2539.98	0.00683457		3069.97	0.00226426		3599.97	0.01080447		4129.97	0.00453351
420.2	0.01212664		950.19	0.00691931		1480.19	0.0164842		2010.18	0.00431647		2540.18	0.00589365		3070.17	0.00166606		3600.17	0.0106367		4130.17	0.00539865
420.4	0.01214359		950.39	0.00735753		1480.39	0.01691128		2010.38	0.00385183		2540.38	0.00493208		3070.37	0.00134513		3600.37	0.01069816		4130.37	0.00558762
420.6	0.01225962		950.59	0.00720903		1480.59	0.01616806		2010.58	0.00332104		2540.58	0.00380082		3070.57	0.00169958		3600.57	0.01052428		4130.57	0.00570334
420.8	0.01187114		950.79	0.00744387		1480.79	0.01488974		2010.78	0.00277955		2540.78	0.00377426		3070.77	0.00045296		3600.77	0.0100134		4130.77	0.00610676
421	0.01108074		950.99	0.0070536		1480.99	0.01399026		2010.98	0.00281754		2540.98	0.00255298		3070.97	-0.0001531		3600.97	0.01006694		4130.97	0.00738391
421.2	0.01101544		951.19	0.00661302		1481.19	0.01350709		2011.18	0.00241934		2541.18	0.00200589		3071.17	0.00000157		3601.17	0.0101689		4131.17	0.00777607
421.4	0.01035398		951.39	0.00639702		1481.39	0.01266925		2011.38	0.00215266		2541.38	0.00164201		3071.37	0.00066845		3601.37	0.00969593		4131.37	0.00764138
421.6	0.01102609		951.59	0.00661938		1481.59	0.01178586		2011.58	0.00241855		2541.58	0.00127933		3071.57	0.0012259		3601.57	0.00946674		4131.57	0.00703385
421.8	0.01047727		951.79	0.00740891		1481.79	0.01157841		2011.78	0.00267955		2541.78	0.0014182		3071.77	0.00169421		3601.77	0.00923239		4131.77	0.00649123
422	0.01090245		951.99	0.00757154		1481.99	0.01095069		2011.98	0.00236316		2541.98	0.00099331		3071.97	0.00192262		3601.97	0.00963484		4131.97	0.00655684
422.2	0.01080924		952.19	0.00756342		1482.19	0.01095286		2012.18	0.00256393		2542.18	0.00093646		3072.17	0.00147278		3602.17	0.00966103		4132.17	0.00635269
422.4	0.01141566		952.39	0.00770651		1482.39	0.01139433		2012.38	0.00172963		2542.38	0.00081375		3072.37	0.00138125		3602.37	0.00961655		4132.37	0.00610058
422.6	0.01151113		952.59	0.00723178		1482.59	0.01192763		2012.58	0.00186163		2542.58	0.00181516		3072.57	0.00275631		3602.57	0.00952527		4132.57	0.00572576
422.8	0.01172864		952.79	0.00703803		1482.79	0.01255047		2012.78	0.00169728		2542.78	0.00291148		3072.77	0.00313086		3602.77	0.00889147		4132.77	0.00651016
423	0.01151314		952.99	0.0071247		1482.99	0.01299464		2012.98	0.00194022		2542.98	0.00386847		3072.97	0.00278823		3602.97	0.00939394		4132.97	0.00584125
423.2	0.01199653		953.19	0.00739153		1483.19	0.01431731		2013.18	0.00213827		2543.18	0.00406152		3073.17	0.00283761		3603.17	0.00952728		4133.17	0.00550575
423.4	0.01190105		953.39	0.00753306		1483.39	0.01495784		2013.38	0.00227295		2543.38	0.00455511		3073.37	0.00325815		3603.37	0.00916032		4133.37	0.00525353
423.6	0.01261742		953.59	0.00839578		1483.59	0.01565773		2013.58	0.00137133		2543.58	0.00429881		3073.57	0.00374868		3603.57	0.00876401		4133.57	0.00577193
423.8	0.01210212		953.79	0.00856605		1483.79	0.01676488		2013.78	0.00156086		2543.78	0.00379854		3073.77	0.00411253		3603.77	0.00966545		4133.77	0.00579141
424	0.01244383		953.99	0.0082841		1483.99	0.01732181		2013.98	0.00216014		2543.98	0.00407585		3073.97	0.0043417		3603.97	0.0087732		4133.97	0.00552499
424.2	0.01225442		954.19	0.00870158		1484.19	0.01785594		2014.18	0.00210692		2544.18	0.00338103		3074.17	0.00448822		3604.17	0.00891807		4134.17	0.00575659
424.4	0.01227992		954.39	0.00872689		1484.39	0.01717101		2014.38	0.00148852		2544.38	0.00357059		3074.37	0.00368812		3604.37	0.00905812		4134.37	0.00516062
424.6	0.01183147		954.59	0.00880194		1484.59	0.01544568		2014.58	0.00165295		2544.58	0.00364512		3074.57	0.0034697		3604.57	0.00794572		4134.57	0.00609232
424.8	0.01118115		954.79	0.00842774		1484.79	0.01483307		2014.78	0.00156485		2544.78	0.00423337		3074.77	0.00194921		3604.77	0.00784808		4134.77	0.00597374
425	0.01078665		954.99	0.00849912		1484.99	0.01428337		2014.98	0.00122756		2544.98	0.00376286		3074.97	0.00164585		3604.97	0.00849863		4134.97	0.00640138
425.2	0.01082334		955.19	0.00826708		1485.19	0.01430239		2015.18	0.00110741		2545.18	0.00365988		3075.17	0.00197245		3605.17	0.00911267		4135.17	0.00676344
425.4	0.01038055		955.39	0.00856973		1485.39	0.01356821		2015.38	0.00122462		2545.38	0.00409735		3075.37	0.00239674		3605.37	0.00907019		4135.37	0.00711258
425.6	0.01049168		955.59	0.00904849		1485.59	0.01355251		2015.58	0.00111894		2545.58	0.00344982		3075.57	0.00213472		3605.57	0.00938741		4135.57	0.00698605
425.8	0.01047625		955.79	0.00901068		1485.79	0.01306679		2015.78	0.00165722		2545.78	0.0040048		3075.77	0.0026776		3605.77	0.00979122		4135.77	0.0065777
426	0.01093313		955.99	0.00830638		1485.99	0.01242722		2015.98	0.00138512		2545.98	0.00422344		3075.97	0.00201734		3605.97	0.01037651		4135.97	0.00707208
426.2	0.01187365		956.19	0.00875498		1486.19	0.01249318		2016.18	0.00152314		2546.18	0.00545842		3076.17	0.00154566		3606.17	0.01004441		4136.17	0.00669192
426.4	0.01207399		956.39	0.00946244		1486.39	0.01277774		2016.38	0.00128072		2546.38	0.00537195		3076.37	0.00094192		3606.37	0.00972085		4136.37	0.00616856
426.6	0.0122611		956.59	0.00883692		1486.59	0.01299061		2016.58	0.00264348		2546.58	0.00550652		3076.57	0.0023825		3606.57	0.0100568		4136.57	0.00572097
426.8	0.01221253		956.79	0.00878766		1486.79	0.0129759		2016.78	0.00377512		2546.78	0.00527975		3076.77	0.00206003		3606.77	0.01049449		4136.77	0.00537031
427	0.01318153		956.99	0.00900275		1486.99	0.01345702		2016.98	0.00432927		2546.98	0.00486449		3076.97	0.00207837		3606.97	0.01043059		4136.97	0.00432986
427.2	0.01427774		957.19	0.00890777		1487.19	0.01350874		2017.18	0.00362649		2547.18	0.00439817		3077.17	0.00238852		3607.17	0.01063523		4137.17	0.00424402
427.4	0.01367314		957.39	0.00922623		1487.39	0.01284599		2017.38	0.00296334		2547.38	0.00392737		3077.37	0.00241554		3607.37	0.0103149		4137.37	0.00378577
427.6	0.01389601		957.59	0.00974805		1487.59	0.01327377		2017.58	0.00207578		2547.58	0.00438742		3077.57	0.00247903		3607.57	0.01048135		4137.57	0.0036806
427.8	0.01385506		957.79	0.00944177		1487.79	0.01371542		2017.78	0.0023252		2547.78	0.00413745		3077.77	0.00234152		3607.77	0.01027173		4137.77	0.00387281
428	0.01380183		957.99	0.00926028		1487.99	0.01414633		2017.98	0.00235608		2547.98	0.00373194		3077.97	0.00274021		3607.97	0.00950673		4137.97	0.00307541
428.2	0.01314959		958.19	0.00989846		1488.19	0.01386289		2018.18	0.00183031		2548.18	0.00477901		3078.17	0.00227386		3608.17	0.00995307		4138.17	0.0026117
428.4	0.01308166		958.39	0.0090788		1488.39	0.01286452		2018.38	0.00129304		2548.38	0.00515642		3078.37	0.00213663		3608.37	0.00973068		4138.37	0.0027943
428.6	0.01228223		958.59	0.01001434		1488.59	0.0123797		2018.58	0.00065244		2548.58	0.00557061		3078.57	0.00318318		3608.57	0.0092438		4138.57	0.00383631
428.8	0.01172129		958.79	0.01024152		1488.79	0.01212829		2018.78	-0.00053254		2548.78	0.00565454		3078.77	0.00303939		3608.77	0.01018336		4138.77	0.00285161
429	0.01197966		958.99	0.01121859		1488.99	0.01186695		2018.98	-0.00116488		2548.98	0.00551444		3078.97	0.00324165		3608.97	0.01031838		4138.97	0.0040804
429.2	0.01152719		959.19	0.01121853		1489.19	0.01200785		2019.18	-0.00082497		2549.18	0.00561198		3079.17	0.00356029		3609.17	0.01062387		4139.17	0.00472907
429.4	0.01105029		959.39	0.01155385		1489.39	0.01202782		2019.38	-0.00046629		2549.38	0.00528328		3079.37	0.00340157		3609.37	0.01063019		4139.37	0.00504576
429.6	0.01039714		959.59	0.01129279		1489.59	0.01208327		2019.58	-0.00074051		2549.58	0.00482984		3079.57	0.00296752		3609.57	0.01053693		4139.57	0.00437632
429.8	0.01037806		959.79	0.01102555		1489.79	0.01203272		2019.78	0.00030438		2549.78	0.00548108		3079.77	0.00223616		3609.77	0.01003608		4139.77	0.0053727
430	0.01079155		959.99	0.00999499		1489.99	0.01165786		2019.98	0.00048192		2549.98	0.00504922		3079.97	0.00105909		3609.97	0.01016446		4139.97	0.00595795
430.2	0.01141856		960.19	0.01018467		1490.19	0.0117569		2020.18	0.00095193		2550.18	0.00512969		3080.17	0.00047777		3610.17	0.00958873		4140.17	0.0061562
430.4	0.01177334		960.39	0.01023505		1490.39	0.01192142		2020.38	0.00116726		2550.38	0.00447206		3080.37	0.00012707		3610.37	0.00963889		4140.37	0.00653717
430.6	0.01226994		960.59	0.00852235		1490.59	0.01207207		2020.58	0.00258572		2550.58	0.00449413		3080.57	0.00080823		3610.57	0.0108524		4140.57	0.00693088
430.8	0.01271641		960.79	0.00807874		1490.79	0.01176245		2020.78	0.00255503		2550.78	0.00393373		3080.77	0.00004744		3610.77	0.01165559		4140.77	0.00720964
431	0.01327927		960.99	0.00746365		1490.99	0.0110593		2020.98	0.00220689		2550.98	0.00291327		3080.97	-0.00072649		3610.97	0.01193953		4140.97	0.00721357
431.2	0.01349904		961.19	0.00679046		1491.19	0.01035151		2021.18	0.0012279		2551.18	0.00258749		3081.17	-0.00094609		3611.17	0.01267888		4141.17	0.00741714
431.4	0.01369333		961.39	0.00680475		1491.39	0.01064298		2021.38	0.00146721		2551.38	0.00335767		3081.37	-0.00168318		3611.37	0.01233544		4141.37	0.00682043
431.6	0.0146029		961.59	0.00649012		1491.59	0.01095765		2021.58	0.0016986		2551.58	0.0030989		3081.57	-0.00189167		3611.57	0.01268089		4141.57	0.0066717
431.8	0.01454093		961.79	0.00675488		1491.79	0.01160634		2021.78	0.00112667		2551.78	0.00200899		3081.77	-0.00255053		3611.77	0.01224761		4141.77	0.00577855
432	0.01388029		961.99	0.00690468		1491.99	0.01219328		2021.98	0.00072953		2551.98	0.00189888		3081.97	-0.00255463		3611.97	0.01262515		4141.97	0.00513439
432.2	0.01385964		962.19	0.00716908		1492.19	0.01207637		2022.18	0.00063152		2552.18	0.0024034		3082.17	-0.00203215		3612.17	0.01184431		4142.17	0.00481275
432.4	0.01414253		962.39	0.00668471		1492.39	0.01142943		2022.38	-0.00078085		2552.38	0.00214124		3082.37	-0.00169138		3612.37	0.01121802		4142.37	0.00507344
432.6	0.01372188		962.59	0.00722446		1492.59	0.01130122		2022.58	-0.0016942		2552.58	0.00232365		3082.57	-0.00147899		3612.57	0.01136665		4142.57	0.00468299
432.8	0.01391242		962.79	0.00698011		1492.79	0.01183166		2022.78	-0.00228752		2552.78	0.00198223		3082.77	-0.00137445		3612.77	0.01166001		4142.77	0.00319968
433	0.0136797		962.99	0.00666781		1492.99	0.01196004		2022.98	-0.00181665		2552.98	0.00237797		3082.97	-0.00175985		3612.97	0.010795		4142.97	0.00386472
433.2	0.01413434		963.19	0.00569285		1493.19	0.01257865		2023.18	-0.00122465		2553.18	0.00259274		3083.17	-0.00143552		3613.17	0.01068912		4143.17	0.00328297
433.4	0.01299547		963.39	0.00481477		1493.39	0.0135843		2023.38	-0.00082899		2553.38	0.00154307		3083.37	-0.00171628		3613.37	0.0102898		4143.37	0.00277766
433.6	0.01299356		963.59	0.00409762		1493.59	0.0131335		2023.58	-0.00102457		2553.58	0.00222448		3083.57	-0.00090684		3613.57	0.00993393		4143.57	0.0031708
433.8	0.0132988		963.79	0.00429297		1493.79	0.01396159		2023.78	-0.0010883		2553.78	0.00214331		3083.77	-0.00097702		3613.77	0.00968129		4143.77	0.0039071
434	0.01318658		963.99	0.00411355		1493.99	0.01425793		2023.98	-0.00128527		2553.98	0.00216649		3083.97	-0.00038795		3613.97	0.01042556		4143.97	0.00323221
434.2	0.01362557		964.19	0.00488014		1494.19	0.01437922		2024.18	-0.00187644		2554.18	0.00241444		3084.17	0.00042382		3614.17	0.01051693		4144.17	0.00330546
434.4	0.01434011		964.39	0.00442835		1494.39	0.01450093		2024.38	-0.00224558		2554.38	0.00204774		3084.37	0.00133658		3614.37	0.01082202		4144.37	0.0034153
434.6	0.01431284		964.59	0.00398194		1494.59	0.01405752		2024.58	-0.00193208		2554.58	0.00183827		3084.57	0.00183256		3614.57	0.01127598		4144.57	0.00332278
434.8	0.01334657		964.79	0.00490812		1494.79	0.01321805		2024.78	-0.00230341		2554.78	0.00077675		3084.77	0.00149002		3614.77	0.01154045		4144.77	0.00320175
435	0.01262435		964.99	0.004714		1494.99	0.01273007		2024.98	-0.00261042		2554.98	0.00111422		3084.97	0.00147555		3614.97	0.01116487		4144.97	0.00334601
435.2	0.01226177		965.19	0.0047416		1495.19	0.01234615		2025.18	-0.00329791		2555.18	0.00182939		3085.17	0.00107997		3615.17	0.01075482		4145.17	0.00361358
435.4	0.01180925		965.39	0.00551111		1495.39	0.0125366		2025.38	-0.00196258		2555.38	0.00223947		3085.37	0.00096017		3615.37	0.01042018		4145.37	0.00269292
435.6	0.01164244		965.59	0.00653841		1495.59	0.01179965		2025.58	-0.00234071		2555.58	0.0013219		3085.57	0.00100255		3615.57	0.01060818		4145.57	0.00324142
435.8	0.01104797		965.79	0.00716662		1495.79	0.01146704		2025.78	-0.00270568		2555.78	0.0013631		3085.77	0.00067947		3615.77	0.01035839		4145.77	0.00265453
436	0.01039956		965.99	0.00707879		1495.99	0.01123973		2025.98	-0.00208972		2555.98	0.00148215		3085.97	0.00100859		3615.97	0.01017019		4145.97	0.00350017
436.2	0.01028594		966.19	0.00739223		1496.19	0.01087942		2026.18	-0.00150057		2556.18	0.00141613		3086.17	0.00079429		3616.17	0.00949527		4146.17	0.0034961
436.4	0.01017721		966.39	0.00767657		1496.39	0.01006813		2026.38	-0.00112403		2556.38	0.00135723		3086.37	0.00036426		3616.37	0.00988848		4146.37	0.00360733
436.6	0.00969718		966.59	0.00738003		1496.59	0.01009774		2026.58	-0.00040167		2556.58	0.00146292		3086.57	0.00053932		3616.57	0.01017026		4146.57	0.00340025
436.8	0.0097396		966.79	0.0069177		1496.79	0.00985596		2026.78	0.00060262		2556.78	0.0015712		3086.77	0.00036439		3616.77	0.01061006		4146.77	0.00363148
437	0.00886437		966.99	0.0057006		1496.99	0.00915818		2026.98	0.00266624		2556.98	0.00160376		3086.97	0.00024797		3616.97	0.01036		4146.97	0.00478002
437.2	0.00982617		967.19	0.00455646		1497.19	0.0096251		2027.18	0.00279442		2557.18	0.00074133		3087.17	0.00055954		3617.17	0.01101725		4147.17	0.00553535
437.4	0.00903467		967.39	0.00459613		1497.39	0.01002222		2027.38	0.00306371		2557.38	0.00010828		3087.37	0.00007457		3617.37	0.01112493		4147.37	0.00580628
437.6	0.01013024		967.59	0.00543146		1497.59	0.00995586		2027.58	0.00228419		2557.58	0.00030475		3087.57	0.00117653		3617.57	0.01055392		4147.57	0.00504855
437.8	0.01077044		967.79	0.00530517		1497.79	0.01098195		2027.78	0.00199594		2557.78	-0.00045994		3087.77	0.00114603		3617.77	0.01066714		4147.77	0.00480503
438	0.01159045		967.99	0.00480163		1497.99	0.01052373		2027.98	0.00231389		2557.98	-0.00107532		3087.97	0.0016884		3617.97	0.01077804		4147.97	0.00414983
438.2	0.01241375		968.19	0.00471093		1498.19	0.01055291		2028.18	0.00231841		2558.18	-0.00126754		3088.17	0.00269534		3618.17	0.00983592		4148.17	0.00361667
438.4	0.01245818		968.39	0.00504383		1498.39	0.01122385		2028.38	0.00264565		2558.38	-0.001466		3088.37	0.00356804		3618.37	0.01021013		4148.37	0.00373728
438.6	0.0114508		968.59	0.00622756		1498.59	0.0112089		2028.58	0.00226583		2558.58	-0.00150315		3088.57	0.0037713		3618.57	0.00934077		4148.57	0.00373344
438.8	0.01114144		968.79	0.00662636		1498.79	0.01163921		2028.78	0.00217782		2558.78	-0.00133938		3088.77	0.00361291		3618.77	0.00833087		4148.77	0.00364336
439	0.01163073		968.99	0.0066133		1498.99	0.01196307		2028.98	0.00234124		2558.98	-0.00047826		3088.97	0.00364005		3618.97	0.00757008		4148.97	0.00379642
439.2	0.01150629		969.19	0.00723187		1499.19	0.01213215		2029.18	0.00203568		2559.18	-0.00044666		3089.17	0.00288305		3619.17	0.00741247		4149.17	0.00313503
439.4	0.01257463		969.39	0.00791795		1499.39	0.01229607		2029.38	0.00283404		2559.38	-0.00023429		3089.37	0.00320745		3619.37	0.00750125		4149.37	0.00285261
439.6	0.01359508		969.59	0.00855851		1499.59	0.01230854		2029.58	0.00218915		2559.58	-0.00010209		3089.57	0.0033066		3619.57	0.00852144		4149.57	0.00395906
439.8	0.01408623		969.79	0.00865619		1499.79	0.01203391		2029.78	0.00234222		2559.78	0.00095912		3089.77	0.00222647		3619.77	0.00805808		4149.77	0.00373425
440	0.01390459		969.99	0.00821784		1499.99	0.01244981		2029.98	0.00251604		2559.98	0.000928		3089.97	0.00211333		3619.97	0.00874815		4149.97	0.00459185
440.2	0.01325541		970.19	0.00874097		1500.19	0.01197918		2030.18	0.00187704		2560.18	0.00072811		3090.17	0.00137121		3620.17	0.00966554		4150.17	0.00477067
440.4	0.01308022		970.39	0.00900817		1500.39	0.0116725		2030.38	0.00182591		2560.38	0.00078883		3090.37	0.00109805		3620.37	0.01018413		4150.37	0.00474397
440.6	0.0128894		970.59	0.00815188		1500.59	0.01180234		2030.58	0.00122131		2560.58	0.00148351		3090.57	0.00057209		3620.57	0.0110554		4150.57	0.00514199
440.8	0.01181245		970.79	0.00773435		1500.79	0.01115668		2030.78	0.00117682		2560.78	0.00149436		3090.77	-0.00014891		3620.77	0.01141802		4150.77	0.00601477
441	0.01149256		970.99	0.007257		1500.99	0.01028836		2030.98	0.00055202		2560.98	0.00119688		3090.97	-0.00041318		3620.97	0.01191516		4150.97	0.00694365
441.2	0.01189339		971.19	0.00679335		1501.19	0.01026293		2031.18	-0.00022109		2561.18	0.00121591		3091.17	-0.00150383		3621.17	0.01251826		4151.17	0.0066501
441.4	0.01120125		971.39	0.00679247		1501.39	0.01018908		2031.38	-0.00050431		2561.38	0.00098852		3091.37	-0.00149944		3621.37	0.0128755		4151.37	0.00501857
441.6	0.01118054		971.59	0.00614003		1501.59	0.00948554		2031.58	-0.00123761		2561.58	0.00037607		3091.57	-0.00067066		3621.57	0.01270789		4151.57	0.00452981
441.8	0.01034519		971.79	0.00562212		1501.79	0.00906483		2031.78	-0.00113753		2561.78	-0.00024974		3091.77	-0.00082406		3621.77	0.01263462		4151.77	0.00547388
442	0.00980762		971.99	0.00526348		1501.99	0.00822385		2031.98	-0.00140432		2561.98	-0.00048088		3091.97	-0.00009209		3621.97	0.01219398		4151.97	0.00464137
442.2	0.00920903		972.19	0.00554312		1502.19	0.0080951		2032.18	-0.00120829		2562.18	-0.00008624		3092.17	0.00026614		3622.17	0.01130439		4152.17	0.0049682
442.4	0.00820238		972.39	0.00569298		1502.39	0.00808894		2032.38	-0.00108019		2562.38	0.00025284		3092.37	0.00017507		3622.37	0.0108968		4152.37	0.00381009
442.6	0.00692603		972.59	0.00544874		1502.59	0.00762688		2032.58	-0.00138546		2562.58	0.00031613		3092.57	0.00036572		3622.57	0.01010171		4152.57	0.0035348
442.8	0.00699509		972.79	0.00497857		1502.79	0.00756389		2032.78	-0.00125162		2562.78	0.00096385		3092.77	0.00105752		3622.77	0.00980629		4152.77	0.00291188
443	0.00689931		972.99	0.00526664		1502.99	0.00757324		2032.98	-0.00157563		2562.98	0.00123066		3092.97	0.00095656		3622.97	0.00955189		4152.97	0.00184889
443.2	0.00691568		973.19	0.00431319		1503.19	0.00730636		2033.18	-0.00237142		2563.18	0.00221472		3093.17	0.00062368		3623.17	0.0101504		4153.17	0.00112918
443.4	0.00825411		973.39	0.00443938		1503.39	0.00763257		2033.38	-0.00198615		2563.38	0.00190936		3093.37	0.00086801		3623.37	0.01046946		4153.37	0.00135611
443.6	0.00836272		973.59	0.00492731		1503.59	0.00866195		2033.58	-0.00238307		2563.58	0.00148295		3093.57	0.00094912		3623.57	0.01107195		4153.57	0.00190988
443.8	0.00908732		973.79	0.00488177		1503.79	0.00925791		2033.78	-0.00261244		2563.78	0.00201535		3093.77	0.00109276		3623.77	0.01070067		4153.77	0.00227367
444	0.00842262		973.99	0.00447862		1503.99	0.00993325		2033.98	-0.0027396		2563.98	0.001588		3093.97	0.00156564		3623.97	0.01206524		4153.97	0.00291192
444.2	0.00949353		974.19	0.00515585		1504.19	0.01031178		2034.18	-0.00288144		2564.18	0.00116351		3094.17	0.0011792		3624.17	0.01219645		4154.17	0.00291884
444.4	0.01015119		974.39	0.00584583		1504.39	0.01107698		2034.38	-0.00277054		2564.38	0.00178535		3094.37	0.00093548		3624.37	0.01223806		4154.37	0.00250609
444.6	0.01018175		974.59	0.00552649		1504.59	0.01156571		2034.58	-0.00190785		2564.58	0.00232961		3094.57	0.00050611		3624.57	0.0131828		4154.57	0.00272062
444.8	0.01031423		974.79	0.00575945		1504.79	0.01154736		2034.78	-0.00171711		2564.78	0.00215179		3094.77	0.00025903		3624.77	0.0135718		4154.77	0.0031766
445	0.01125445		974.99	0.00577798		1504.99	0.01143796		2034.98	-0.00151178		2564.98	0.00229938		3094.97	-0.00036374		3624.97	0.0144067		4154.97	0.00383245
445.2	0.01084916		975.19	0.00585889		1505.19	0.01248373		2035.18	-0.00088191		2565.18	0.00227429		3095.17	-0.00047848		3625.17	0.01475554		4155.17	0.00377651
445.4	0.01065979		975.39	0.0060627		1505.39	0.0127967		2035.38	-0.00089764		2565.38	0.00130907		3095.37	0.00029599		3625.37	0.01416206		4155.37	0.00388703
445.6	0.01194256		975.59	0.00605834		1505.59	0.0133775		2035.58	-0.00082037		2565.58	0.00016357		3095.57	0.00043522		3625.57	0.01269255		4155.57	0.00572513
445.8	0.01139124		975.79	0.00592404		1505.79	0.01376565		2035.78	-0.00052258		2565.78	-0.00042899		3095.77	0.00046297		3625.77	0.01221155		4155.77	0.00654756
446	0.01172854		975.99	0.00574484		1505.99	0.0132523		2035.98	-0.00006112		2565.98	-0.00005049		3095.97	0.00057585		3625.97	0.01086393		4155.97	0.00636864
446.2	0.01210846		976.19	0.00578386		1506.19	0.0139364		2036.18	0.00038125		2566.18	0.00000812		3096.17	-0.00019824		3626.17	0.01039113		4156.17	0.00746005
446.4	0.01172694		976.39	0.0057164		1506.39	0.01525428		2036.38	0.00058997		2566.38	0.00097616		3096.37	-0.00056242		3626.37	0.01035959		4156.37	0.00662321
446.6	0.01146511		976.59	0.00622254		1506.59	0.01555031		2036.58	0.00032365		2566.58	0.00036936		3096.57	-0.00001846		3626.57	0.01044708		4156.57	0.00726749
446.8	0.01185698		976.79	0.00559542		1506.79	0.01591905		2036.78	-0.00044217		2566.78	0.00036292		3096.77	-0.00055802		3626.77	0.00947959		4156.77	0.00711579
447	0.0122689		976.99	0.00637322		1506.99	0.01608108		2036.98	-0.00119332		2566.98	0.00008493		3096.97	-0.00160074		3626.97	0.0089646		4156.97	0.00666975
447.2	0.01230663		977.19	0.00594101		1507.19	0.01520413		2037.18	-0.00145948		2567.18	0.00031152		3097.17	-0.00175388		3627.17	0.00882174		4157.17	0.00697526
447.4	0.01239964		977.39	0.00653585		1507.39	0.01531366		2037.38	-0.00171357		2567.38	-0.00025385		3097.37	-0.00167438		3627.37	0.00861513		4157.37	0.00623268
447.6	0.01240848		977.59	0.00674979		1507.59	0.01476199		2037.58	-0.00188637		2567.58	0.00018358		3097.57	-0.00060892		3627.57	0.00871369		4157.57	0.00580871
447.8	0.01272198		977.79	0.00674411		1507.79	0.01403949		2037.78	-0.00212582		2567.78	0.00121622		3097.77	-0.00005213		3627.77	0.0089391		4157.77	0.00580552
448	0.01237209		977.99	0.00606736		1507.99	0.01285586		2037.98	-0.00147086		2567.98	0.00163871		3097.97	0.00021421		3627.97	0.00860424		4157.97	0.00441656
448.2	0.01300182		978.19	0.005261		1508.19	0.012356		2038.18	-0.00140696		2568.18	0.00157567		3098.17	0.00045562		3628.17	0.00813643		4158.17	0.00318739
448.4	0.01156917		978.39	0.00552039		1508.39	0.01136643		2038.38	-0.00145997		2568.38	0.00249462		3098.37	0.00093276		3628.37	0.00846921		4158.37	0.00168571
448.6	0.01068596		978.59	0.004986		1508.59	0.01053659		2038.58	-0.00063915		2568.58	0.0029746		3098.57	0.00156277		3628.57	0.00922314		4158.57	0.00125814
448.8	0.01026499		978.79	0.00506422		1508.79	0.00933051		2038.78	-0.00034367		2568.78	0.0031785		3098.77	0.001374		3628.77	0.00888395		4158.77	0.00113944
449	0.00984027		978.99	0.00510719		1508.99	0.00865512		2038.98	0.00006805		2568.98	0.00298614		3098.97	0.00097669		3628.97	0.00908716		4158.97	0.00123133
449.2	0.00928752		979.19	0.005534		1509.19	0.00900892		2039.18	-0.00106417		2569.18	0.00261397		3099.17	0.0022292		3629.17	0.00907291		4159.17	0.00109345
449.4	0.00926926		979.39	0.00568869		1509.39	0.00877627		2039.38	-0.00058754		2569.38	0.00187069		3099.37	0.00275535		3629.37	0.00863019		4159.37	0.00178367
449.6	0.0096858		979.59	0.00488395		1509.59	0.00895289		2039.58	-0.00077318		2569.58	0.00147107		3099.57	0.00286684		3629.57	0.00847687		4159.57	0.00182984
449.8	0.00874504		979.79	0.00490683		1509.79	0.00923212		2039.78	-0.00005711		2569.78	0.0025866		3099.77	0.00310759		3629.77	0.00924139		4159.77	0.00214309
450	0.00949656		979.99	0.00519514		1509.99	0.00955084		2039.98	0.00011312		2569.98	0.00342694		3099.97	0.00311626		3629.97	0.00866237		4159.97	0.00297396
450.2	0.00988182		980.19	0.00423911		1510.19	0.0110552		2040.18	0.0000219		2570.18	0.00319299		3100.17	0.00201619		3630.17	0.0103053		4160.17	0.00330341
450.4	0.01028249		980.39	0.00440009		1510.39	0.0116273		2040.38	0.00018539		2570.38	0.00352653		3100.37	0.00193028		3630.37	0.01046557		4160.37	0.00257496
450.6	0.01075069		980.59	0.0043809		1510.59	0.01115412		2040.58	-0.00090762		2570.58	0.00227915		3100.57	0.00140983		3630.57	0.01007209		4160.57	0.0030817
450.8	0.01166186		980.79	0.00318215		1510.79	0.01194297		2040.78	-0.00228251		2570.78	0.00271127		3100.77	0.0007286		3630.77	0.00979505		4160.77	0.00259669
451	0.01154136		980.99	0.00361394		1510.99	0.01252295		2040.98	-0.00271314		2570.98	0.00233476		3100.97	0.00017889		3630.97	0.00919559		4160.97	0.00272953
451.2	0.0112875		981.19	0.0031991		1511.19	0.01217725		2041.18	-0.0029883		2571.18	0.00234124		3101.17	0.00058658		3631.17	0.00854617		4161.17	0.00206123
451.4	0.01201122		981.39	0.00310915		1511.39	0.01221312		2041.38	-0.00319356		2571.38	0.00319697		3101.37	0.00042758		3631.37	0.00900363		4161.37	0.00084328
451.6	0.01183185		981.59	0.0027525		1511.59	0.01132042		2041.58	-0.003106		2571.58	0.00263356		3101.57	0.00147476		3631.57	0.00898378		4161.57	0.00069626
451.8	0.01204877		981.79	0.00237645		1511.79	0.01040922		2041.78	-0.0040106		2571.78	0.00257122		3101.77	0.00142973		3631.77	0.00853385		4161.77	0.00108908
452	0.01173026		981.99	0.00156519		1511.99	0.00920775		2041.98	-0.0047806		2571.98	0.0019872		3101.97	0.00104938		3631.97	0.00821759		4161.97	0.0003471
452.2	0.01189263		982.19	0.00157624		1512.19	0.00918657		2042.18	-0.0058082		2572.18	0.00106846		3102.17	0.00096012		3632.17	0.00785681		4162.17	0.00148731
452.4	0.01134369		982.39	0.00208061		1512.39	0.00810831		2042.38	-0.00623286		2572.38	0.00130551		3102.37	0.0012185		3632.37	0.00805809		4162.37	0.00135582
452.6	0.01055479		982.59	0.00192966		1512.59	0.00751876		2042.58	-0.00644084		2572.58	0.0007276		3102.57	0.00126152		3632.57	0.00852022		4162.57	0.00161697
452.8	0.01085273		982.79	0.00279468		1512.79	0.00658968		2042.78	-0.00673289		2572.78	-0.00005985		3102.77	-0.00016926		3632.77	0.00855536		4162.77	0.00232273
453	0.0104291		982.99	0.00343072		1512.99	0.00728171		2042.98	-0.00697714		2572.98	-0.00084965		3102.97	-0.00073346		3632.97	0.0096383		4162.97	0.00280982
453.2	0.00985977		983.19	0.00457439		1513.19	0.00693444		2043.18	-0.0068487		2573.18	-0.00120377		3103.17	-0.0002283		3633.17	0.00988078		4163.17	0.00352495
453.4	0.009203		983.39	0.00387742		1513.39	0.00702391		2043.38	-0.00544646		2573.38	-0.00098745		3103.37	-0.00098838		3633.37	0.01001031		4163.37	0.00391223
453.6	0.00879003		983.59	0.00356575		1513.59	0.00711516		2043.58	-0.00501505		2573.58	-0.00046354		3103.57	-0.00101017		3633.57	0.01040083		4163.57	0.00387921
453.8	0.00854599		983.79	0.00348625		1513.79	0.00731983		2043.78	-0.00430392		2573.78	0.00011872		3103.77	-0.00048246		3633.77	0.01104662		4163.77	0.00523819
454	0.00890118		983.99	0.00288306		1513.99	0.00682917		2043.98	-0.00385049		2573.98	-0.00052116		3103.97	-0.00045123		3633.97	0.0121395		4163.97	0.00532622
454.2	0.00854736		984.19	0.00281838		1514.19	0.0065802		2044.18	-0.00245438		2574.18	-0.00089204		3104.17	-0.00128727		3634.17	0.01300739		4164.17	0.00439313
454.4	0.00860846		984.39	0.00335023		1514.39	0.0071171		2044.38	-0.00154365		2574.38	-0.00054092		3104.37	-0.00021144		3634.37	0.01275357		4164.37	0.00440187
454.6	0.0088445		984.59	0.00327044		1514.59	0.00743906		2044.58	-0.00198059		2574.58	-0.00034137		3104.57	-0.00040959		3634.57	0.01258488		4164.57	0.00404772
454.8	0.00822757		984.79	0.0029353		1514.79	0.00928437		2044.78	-0.0020591		2574.78	0.00056097		3104.77	0.00036081		3634.77	0.01210149		4164.77	0.00267813
455	0.0075953		984.99	0.00341726		1514.99	0.00992708		2044.98	-0.00120103		2574.98	0.00118848		3104.97	0.00021326		3634.97	0.01120976		4164.97	0.00290688
455.2	0.00789779		985.19	0.0039824		1515.19	0.00911188		2045.18	-0.00089399		2575.18	0.00142663		3105.17	0.00063974		3635.17	0.01121412		4165.17	0.00145548
455.4	0.00831974		985.39	0.00362632		1515.39	0.0089975		2045.38	-0.00058284		2575.38	0.00171478		3105.37	0.00038679		3635.37	0.01167665		4165.37	0.00201289
455.6	0.00805269		985.59	0.00424607		1515.59	0.00755704		2045.58	-0.0013237		2575.58	0.00126901		3105.57	0.00166264		3635.57	0.01133641		4165.57	0.00231059
455.8	0.00897328		985.79	0.0045063		1515.79	0.00699687		2045.78	-0.00251101		2575.78	0.00109428		3105.77	0.00206004		3635.77	0.01077785		4165.77	0.00325202
456	0.00916852		985.99	0.00480846		1515.99	0.00755853		2045.98	-0.00348389		2575.98	0.00182101		3105.97	0.00209556		3635.97	0.00992702		4165.97	0.003139
456.2	0.00925921		986.19	0.00512244		1516.19	0.00793645		2046.18	-0.00328747		2576.18	0.00179873		3106.17	0.00357928		3636.17	0.00934329		4166.17	0.003947
456.4	0.00913955		986.39	0.00463893		1516.39	0.00832985		2046.38	-0.00359171		2576.38	0.00194735		3106.37	0.00330919		3636.37	0.00905114		4166.37	0.00339446
456.6	0.00930535		986.59	0.00513306		1516.59	0.00919958		2046.58	-0.00358255		2576.58	0.00181227		3106.57	0.00227825		3636.57	0.00876276		4166.57	0.00388358
456.8	0.00989865		986.79	0.00476916		1516.79	0.00955423		2046.78	-0.00315177		2576.78	0.00217112		3106.77	0.00079827		3636.77	0.00827836		4166.77	0.00429672
457	0.00951583		986.99	0.00437781		1516.99	0.01046743		2046.98	-0.00242408		2576.98	0.00263549		3106.97	0.00029107		3636.97	0.0082109		4166.97	0.00429247
457.2	0.00823037		987.19	0.00462335		1517.19	0.01050009		2047.18	-0.00121466		2577.18	0.00270848		3107.17	0.00001847		3637.17	0.00815671		4167.17	0.00443068
457.4	0.00826932		987.39	0.00423848		1517.39	0.01146376		2047.38	-0.00036522		2577.38	0.00386547		3107.37	-0.0010377		3637.37	0.00840429		4167.37	0.00467625
457.6	0.00852117		987.59	0.0042531		1517.59	0.01173659		2047.58	-0.00009923		2577.58	0.00335216		3107.57	-0.00115269		3637.57	0.00854686		4167.57	0.0046558
457.8	0.00856307		987.79	0.00324037		1517.79	0.01171401		2047.78	-0.0010028		2577.78	0.00294259		3107.77	-0.00156585		3637.77	0.00821642		4167.77	0.00470644
458	0.00864077		987.99	0.00357692		1517.99	0.01094133		2047.98	-0.00097359		2577.98	0.00259569		3107.97	-0.00278671		3637.97	0.00847568		4167.97	0.00361949
458.2	0.00889515		988.19	0.0038582		1518.19	0.01066313		2048.18	-0.00104694		2578.18	0.00283176		3108.17	-0.00350864		3638.17	0.00802987		4168.17	0.0025142
458.4	0.00857066		988.39	0.00453407		1518.39	0.01053166		2048.38	-0.00140826		2578.38	0.00340861		3108.37	-0.00345508		3638.37	0.00798169		4168.37	0.00198414
458.6	0.00850577		988.59	0.00508215		1518.59	0.00958997		2048.58	-0.00253661		2578.58	0.0034133		3108.57	-0.00376731		3638.57	0.0083695		4168.57	0.00095343
458.8	0.00804754		988.79	0.00541671		1518.79	0.00972198		2048.78	-0.00339873		2578.78	0.00317843		3108.77	-0.00353522		3638.77	0.00756364		4168.77	0.00076991
459	0.00916148		988.99	0.00601997		1518.99	0.0093936		2048.98	-0.00322095		2578.98	0.00245929		3108.97	-0.00444443		3638.97	0.0081306		4168.97	0.00019714
459.2	0.00972945		989.19	0.00607491		1519.19	0.00887542		2049.18	-0.00312912		2579.18	0.0022787		3109.17	-0.00449782		3639.17	0.00882828		4169.17	-0.00065156
459.4	0.01062326		989.39	0.00583788		1519.39	0.00912006		2049.38	-0.00387168		2579.38	0.00134893		3109.37	-0.00412136		3639.37	0.00923763		4169.37	-0.000018
459.6	0.0105945		989.59	0.00647326		1519.59	0.00825555		2049.58	-0.00374462		2579.58	0.00049508		3109.57	-0.00245572		3639.57	0.00932843		4169.57	-0.00104685
459.8	0.01082325		989.79	0.0062153		1519.79	0.00921845		2049.78	-0.00340664		2579.78	-0.00008764		3109.77	-0.0024537		3639.77	0.00934783		4169.77	-0.0005856
460	0.01083858		989.99	0.00586744		1519.99	0.0102931		2049.98	-0.00297706		2579.98	-0.00016824		3109.97	-0.00217808		3639.97	0.00902845		4169.97	-0.00044446
460.2	0.01079239		990.19	0.00591828		1520.19	0.01021463		2050.18	-0.00211474		2580.18	-0.00098962		3110.17	-0.00135758		3640.17	0.00953764		4170.17	-0.00006803
460.4	0.0117247		990.39	0.00583939		1520.39	0.01141304		2050.38	-0.00181086		2580.38	-0.00108104		3110.37	-0.00181569		3640.37	0.00968214		4170.37	-0.00047097
460.6	0.0117506		990.59	0.00565709		1520.59	0.01170934		2050.58	-0.0005121		2580.58	-0.00059785		3110.57	-0.00098735		3640.57	0.00970667		4170.57	-0.00004263
460.8	0.01185444		990.79	0.00567235		1520.79	0.01237386		2050.78	0.00011012		2580.78	0.0001947		3110.77	-0.00101201		3640.77	0.00922374		4170.77	0.0003258
461	0.01121047		990.99	0.00545982		1520.99	0.01266833		2050.98	0.00076641		2580.98	0.00018827		3110.97	-0.00024612		3640.97	0.00954011		4170.97	0.00124356
461.2	0.01113595		991.19	0.00482866		1521.19	0.01315364		2051.18	0.00165345		2581.18	0.00066482		3111.17	0.00039097		3641.17	0.01058102		4171.17	0.00151038
461.4	0.01184369		991.39	0.00446476		1521.39	0.0136072		2051.38	0.00125169		2581.38	0.00095684		3111.37	0.00017985		3641.37	0.01037064		4171.37	0.00187047
461.6	0.01192859		991.59	0.00349858		1521.59	0.01293435		2051.58	0.00011045		2581.58	0.00032283		3111.57	-0.00011085		3641.57	0.00940474		4171.57	0.0019007
461.8	0.01156772		991.79	0.00252258		1521.79	0.01223178		2051.78	-0.00138388		2581.78	-0.00014448		3111.77	-0.00011724		3641.77	0.00852584		4171.77	0.00177987
462	0.01111016		991.99	0.0028681		1521.99	0.01132246		2051.98	-0.00162156		2581.98	0.00103727		3111.97	-0.00056969		3641.97	0.00839186		4171.97	0.00084571
462.2	0.01086778		992.19	0.00197685		1522.19	0.01128783		2052.18	-0.00191169		2582.18	0.00123132		3112.17	-0.00065462		3642.17	0.00779008		4172.17	0.0008788
462.4	0.00993032		992.39	0.00289523		1522.39	0.01023314		2052.38	-0.0018003		2582.38	0.00194926		3112.37	-0.00095591		3642.37	0.00735695		4172.37	0.00104548
462.6	0.0095885		992.59	0.00341289		1522.59	0.0094238		2052.58	-0.0023107		2582.58	0.00130222		3112.57	-0.00058405		3642.57	0.00766924		4172.57	0.00111335
462.8	0.00965254		992.79	0.00310745		1522.79	0.00915574		2052.78	-0.00262254		2582.78	0.00139146		3112.77	-0.00078319		3642.77	0.00727947		4172.77	0.00110443
463	0.00988613		992.99	0.00361073		1522.99	0.00955947		2052.98	-0.00217407		2582.98	0.00127938		3112.97	-0.00205339		3642.97	0.00763174		4172.97	0.00062756
463.2	0.01038466		993.19	0.00344219		1523.19	0.0085254		2053.18	-0.00184873		2583.18	0.00181133		3113.17	-0.00202483		3643.17	0.00783378		4173.17	0.00040092
463.4	0.0105516		993.39	0.00322588		1523.39	0.0080996		2053.38	-0.00178913		2583.38	0.00093479		3113.37	-0.00165537		3643.37	0.00834204		4173.37	-0.00000045
463.6	0.00953484		993.59	0.00345748		1523.59	0.00738394		2053.58	-0.00114771		2583.58	0.00108199		3113.57	-0.00197249		3643.57	0.00868104		4173.57	0.00013947
463.8	0.00975095		993.79	0.00455385		1523.79	0.00728492		2053.78	-0.00094824		2583.78	0.0022057		3113.77	-0.00262532		3643.77	0.00859695		4173.77	0.00071288
464	0.00955264		993.99	0.00529069		1523.99	0.00638362		2053.98	-0.0004908		2583.98	0.00202582		3113.97	-0.00259615		3643.97	0.0079535		4173.97	0.00082535
464.2	0.0099372		994.19	0.00651546		1524.19	0.00628266		2054.18	-0.00040093		2584.18	0.00315619		3114.17	-0.00267215		3644.17	0.00877487		4174.17	0.00040759
464.4	0.01039051		994.39	0.00673881		1524.39	0.00704951		2054.38	-0.00022498		2584.38	0.0032252		3114.37	-0.0020563		3644.37	0.00961035		4174.37	0.00050854
464.6	0.00991698		994.59	0.00760318		1524.59	0.00710116		2054.58	-0.00035469		2584.58	0.00418496		3114.57	-0.00207677		3644.57	0.00972754		4174.57	0.00089629
464.8	0.01031945		994.79	0.00743981		1524.79	0.00731743		2054.78	-0.00052816		2584.78	0.00413726		3114.77	-0.00227298		3644.77	0.00962118		4174.77	0.00120546
465	0.01048086		994.99	0.00670279		1524.99	0.00725264		2054.98	-0.00089128		2584.98	0.00366266		3114.97	-0.00195164		3644.97	0.01013432		4174.97	0.00086337
465.2	0.01159866		995.19	0.00623883		1525.19	0.00720217		2055.18	-0.00200577		2585.18	0.00325171		3115.17	-0.00118408		3645.17	0.01022433		4175.17	0.00105421
465.4	0.01163961		995.39	0.00697934		1525.39	0.00770712		2055.38	-0.00232347		2585.38	0.00206839		3115.37	-0.00171717		3645.37	0.00949172		4175.37	0.00078568
465.6	0.01150238		995.59	0.00676414		1525.59	0.00747903		2055.58	-0.00210386		2585.58	0.00145573		3115.57	-0.00198622		3645.57	0.00880484		4175.57	0.00028749
465.8	0.01112429		995.79	0.00603655		1525.79	0.00874771		2055.78	-0.00280397		2585.78	0.00056018		3115.77	-0.00182754		3645.77	0.00831513		4175.77	-0.0009866
466	0.01046899		995.99	0.00583985		1525.99	0.00966686		2055.98	-0.00215971		2585.98	0.00130779		3115.97	-0.00180335		3645.97	0.00762623		4175.97	-0.00108738
466.2	0.01015864		996.19	0.00530955		1526.19	0.01038707		2056.18	-0.001895		2586.18	0.00036738		3116.17	-0.0013861		3646.17	0.00655159		4176.17	-0.00013017
466.4	0.01025753		996.39	0.00603581		1526.39	0.01014475		2056.38	-0.00162048		2586.38	0.00001286		3116.37	-0.00113886		3646.37	0.00683685		4176.37	0.0000166
466.6	0.00986935		996.59	0.00575573		1526.59	0.00985264		2056.58	-0.00129263		2586.58	-0.00062265		3116.57	-0.00045006		3646.57	0.00647541		4176.57	0.0005371
466.8	0.00966053		996.79	0.00498608		1526.79	0.00991533		2056.78	-0.0010501		2586.78	-0.0008994		3116.77	-0.00002924		3646.77	0.00607633		4176.77	0.00069458
467	0.00956544		996.99	0.00527932		1526.99	0.01059827		2056.98	-0.0007252		2586.98	-0.00203437		3116.97	-0.0000114		3646.97	0.00592847		4176.97	0.00109148
467.2	0.0096651		997.19	0.00466594		1527.19	0.0102503		2057.18	-0.00068691		2587.18	-0.00212702		3117.17	0.00073448		3647.17	0.00661006		4177.17	0.00139709
467.4	0.00904786		997.39	0.00339961		1527.39	0.00958415		2057.38	-0.00047251		2587.38	-0.00220679		3117.37	0.00086436		3647.37	0.00700885		4177.37	0.00186296
467.6	0.00802847		997.59	0.00193244		1527.59	0.00936998		2057.58	-0.00057721		2587.58	-0.0016994		3117.57	0.00053419		3647.57	0.00805173		4177.57	0.0024101
467.8	0.00797582		997.79	0.00116521		1527.79	0.00889902		2057.78	-0.00023447		2587.78	-0.00142448		3117.77	0.00111374		3647.77	0.00787445		4177.77	0.0017265
468	0.00816487		997.99	0.00067992		1527.99	0.00878932		2057.98	0.00010204		2587.98	-0.00163998		3117.97	0.00023774		3647.97	0.00778928		4177.97	0.0023578
468.2	0.00779403		998.19	-0.00034076		1528.19	0.00940813		2058.18	-0.00080136		2588.18	-0.00133676		3118.17	-0.0005422		3648.17	0.00940073		4178.17	0.00287806
468.4	0.00769783		998.39	-0.00110276		1528.39	0.00921283		2058.38	-0.00092025		2588.38	-0.00142848		3118.37	-0.00039825		3648.37	0.01001015		4178.37	0.00249114
468.6	0.00768829		998.59	-0.00054301		1528.59	0.00899525		2058.58	-0.00112844		2588.58	0.00004012		3118.57	-0.00098537		3648.57	0.01025569		4178.57	0.0016731
468.8	0.00864061		998.79	-0.00053362		1528.79	0.00878138		2058.78	-0.00070693		2588.78	-0.00048274		3118.77	-0.00092755		3648.77	0.01068698		4178.77	0.00128998
469	0.00899236		998.99	0.00066837		1528.99	0.0081154		2058.98	-0.00179222		2588.98	0.00084877		3118.97	-0.00111139		3648.97	0.0105633		4178.97	0.00164015
469.2	0.00889104		999.19	0.00100462		1529.19	0.00844781		2059.18	-0.0023519		2589.18	0.0011288		3119.17	-0.0008919		3649.17	0.01087228		4179.17	0.0023351
469.4	0.00929173		999.39	0.00149043		1529.39	0.00914009		2059.38	-0.00221305		2589.38	0.00153554		3119.37	-0.00178466		3649.37	0.01056449		4179.37	0.00159242
469.6	0.00899489		999.59	0.00181758		1529.59	0.00904663		2059.58	-0.00297305		2589.58	0.00158998		3119.57	-0.0018954		3649.57	0.01043204		4179.57	0.00136882
469.8	0.00891906		999.79	0.00228305		1529.79	0.00904565		2059.78	-0.00369626		2589.78	0.00209451		3119.77	-0.00217317		3649.77	0.01022904		4179.77	0.0005933
470	0.00896933		999.99	0.00317253		1529.99	0.00933978		2059.98	-0.00334273		2589.98	0.0029612		3119.97	-0.00194074		3649.97	0.0093191		4179.97	0.00161327
470.2	0.00907405		1000.19	0.00370691		1530.19	0.00930612		2060.18	-0.00409273		2590.18	0.00326344		3120.17	-0.0024509		3650.17	0.00927165		4180.17	0.00159903
470.4	0.00878926		1000.39	0.00441764		1530.39	0.00965116		2060.38	-0.00360171		2590.38	0.00268639		3120.37	-0.00245805		3650.37	0.00885446		4180.37	0.00135107
470.6	0.00800462		1000.59	0.00530761		1530.59	0.01050497		2060.58	-0.00322148		2590.58	0.0028418		3120.57	-0.00199781		3650.57	0.00831417		4180.57	0.00125662
470.8	0.00818628		1000.79	0.00560923		1530.79	0.01068938		2060.78	-0.00369561		2590.78	0.0028387		3120.77	-0.00158		3650.77	0.00947644		4180.77	0.00091413
471	0.0084906		1000.99	0.00577363		1530.99	0.01083047		2060.98	-0.00408756		2590.98	0.00151693		3120.97	-0.00136024		3650.97	0.0101222		4180.97	0.00007637
471.2	0.00828866		1001.19	0.0048191		1531.19	0.01010682		2061.18	-0.00415892		2591.18	0.00121307		3121.17	-0.00165581		3651.17	0.01058804		4181.17	-0.00016098
471.4	0.00866364		1001.39	0.00362112		1531.39	0.00985354		2061.38	-0.00376261		2591.38	0.00127211		3121.37	-0.0017445		3651.37	0.01083161		4181.37	-0.00161151
471.6	0.00907339		1001.59	0.00250359		1531.59	0.01052865		2061.58	-0.00376387		2591.58	0.0007808		3121.57	-0.0014364		3651.57	0.01125884		4181.57	-0.00192044
471.8	0.00948981		1001.79	0.00250622		1531.79	0.01037871		2061.78	-0.00343036		2591.78	-0.00028128		3121.77	-0.00161265		3651.77	0.01052423		4181.77	-0.00237198
472	0.00929726		1001.99	0.00337559		1531.99	0.01126067		2061.98	-0.00357967		2591.98	-0.0005485		3121.97	-0.00218119		3651.97	0.01137104		4181.97	-0.00158544
472.2	0.00855709		1002.19	0.00355315		1532.19	0.01099121		2062.18	-0.0028715		2592.18	-0.00111493		3122.17	-0.0019885		3652.17	0.01237402		4182.17	-0.00140847
472.4	0.00894307		1002.39	0.00378559		1532.39	0.01044909		2062.38	-0.00272815		2592.38	-0.00107025		3122.37	-0.00109706		3652.37	0.01160505		4182.37	-0.00203349
472.6	0.00929325		1002.59	0.00439457		1532.59	0.01032726		2062.58	-0.0018984		2592.58	-0.00024892		3122.57	-0.00099716		3652.57	0.01116428		4182.57	-0.00206117
472.8	0.00946082		1002.79	0.00453539		1532.79	0.01024451		2062.78	-0.00170823		2592.78	-0.00057962		3122.77	-0.00151869		3652.77	0.01151138		4182.77	-0.0013034
473	0.00928269		1002.99	0.00441799		1532.99	0.00964447		2062.98	-0.00226092		2592.98	0.00043852		3122.97	-0.00128025		3652.97	0.01052699		4182.97	-0.00060825
473.2	0.00942593		1003.19	0.00390981		1533.19	0.01012319		2063.18	-0.00190452		2593.18	0.00013028		3123.17	-0.00060878		3653.17	0.01082591		4183.17	0.00012068
473.4	0.00984417		1003.39	0.00372559		1533.39	0.00934031		2063.38	-0.00207215		2593.38	0.00053821		3123.37	-0.00011794		3653.37	0.00998788		4183.37	-0.00024101
473.6	0.00979543		1003.59	0.00355555		1533.59	0.00867987		2063.58	-0.00259538		2593.58	0.00057915		3123.57	-0.00055823		3653.57	0.00990546		4183.57	-0.00067279
473.8	0.00985603		1003.79	0.00396282		1533.79	0.00777489		2063.78	-0.00149317		2593.78	0.00132516		3123.77	-0.00123387		3653.77	0.01009073		4183.77	-0.00101211
474	0.00941424		1003.99	0.00433841		1533.99	0.00853593		2063.98	-0.0018593		2593.98	0.00193941		3123.97	-0.00073701		3653.97	0.00961613		4183.97	0.00004119
474.2	0.00851778		1004.19	0.003342		1534.19	0.00853808		2064.18	-0.00308561		2594.18	0.00155849		3124.17	-0.00023791		3654.17	0.00924707		4184.17	-0.0007836
474.4	0.00817559		1004.39	0.00294508		1534.39	0.00908385		2064.38	-0.0027804		2594.38	0.00061063		3124.37	0.00022662		3654.37	0.0080673		4184.37	-0.00058728
474.6	0.00823327		1004.59	0.00323262		1534.59	0.0093658		2064.58	-0.00285916		2594.58	0.00152466		3124.57	0.00033538		3654.57	0.00871435		4184.57	-0.0009319
474.8	0.00884082		1004.79	0.00269938		1534.79	0.00896868		2064.78	-0.00366379		2594.78	0.00152923		3124.77	0.00034341		3654.77	0.00917211		4184.77	-0.00066617
475	0.00861433		1004.99	0.00289231		1534.99	0.00930706		2064.98	-0.00318297		2594.98	0.00135662		3124.97	0.00084103		3654.97	0.00805741		4184.97	-0.00114041
475.2	0.00863134		1005.19	0.00254052		1535.19	0.00991009		2065.18	-0.00321953		2595.18	0.00129996		3125.17	0.00018993		3655.17	0.00733563		4185.17	-0.00015168
475.4	0.00935614		1005.39	0.00267202		1535.39	0.01074732		2065.38	-0.00311226		2595.38	0.00166207		3125.37	0.00014201		3655.37	0.00695893		4185.37	-0.00029891
475.6	0.00922847		1005.59	0.002335		1535.59	0.01061192		2065.58	-0.00270433		2595.58	0.00102457		3125.57	-0.00041979		3655.57	0.0069559		4185.57	0.00074099
475.8	0.00829491		1005.79	0.00274565		1535.79	0.01057675		2065.78	-0.00275395		2595.78	0.00113184		3125.77	-0.00089062		3655.77	0.00708484		4185.77	0.00052789
476	0.00796409		1005.99	0.00277877		1535.99	0.01090092		2065.98	-0.00317359		2595.98	0.00160047		3125.97	0.00010563		3655.97	0.00790651		4185.97	0.00057941
476.2	0.00833204		1006.19	0.00280019		1536.19	0.00991174		2066.18	-0.00217841		2596.18	0.00159492		3126.17	0.00031289		3656.17	0.00747912		4186.17	0.00099972
476.4	0.00827299		1006.39	0.00276		1536.39	0.00916169		2066.38	-0.00350047		2596.38	0.00168957		3126.37	0.00007166		3656.37	0.00654366		4186.37	0.00135038
476.6	0.00833256		1006.59	0.00265749		1536.59	0.00876792		2066.58	-0.00290857		2596.58	0.0016706		3126.57	-0.00127297		3656.57	0.00701341		4186.57	0.00174653
476.8	0.00843693		1006.79	0.00364497		1536.79	0.00813143		2066.78	-0.00388239		2596.78	0.00097998		3126.77	-0.0021796		3656.77	0.00784435		4186.77	0.00244643
477	0.00848185		1006.99	0.00357211		1536.99	0.00712471		2066.98	-0.00401664		2596.98	0.00045263		3126.97	-0.00190483		3656.97	0.00812857		4186.97	0.00226785
477.2	0.0082975		1007.19	0.00379727		1537.19	0.00693888		2067.18	-0.00393981		2597.18	-0.00018703		3127.17	-0.00167115		3657.17	0.00868168		4187.17	0.00257322
477.4	0.00886307		1007.39	0.00438016		1537.39	0.00596868		2067.38	-0.00443566		2597.38	-0.00018535		3127.37	-0.00313635		3657.37	0.00850433		4187.37	0.00184383
477.6	0.00966375		1007.59	0.00373302		1537.59	0.00608178		2067.58	-0.00430652		2597.58	-0.00025154		3127.57	-0.0036221		3657.57	0.00914812		4187.57	0.00252399
477.8	0.00952326		1007.79	0.00399076		1537.79	0.00551554		2067.78	-0.00383637		2597.78	-0.00061619		3127.77	-0.00327204		3657.77	0.00972372		4187.77	0.00244037
478	0.00915591		1007.99	0.00376337		1537.99	0.00547381		2067.98	-0.00526783		2597.98	-0.00106616		3127.97	-0.00309786		3657.97	0.00949799		4187.97	0.00281528
478.2	0.00903572		1008.19	0.0030129		1538.19	0.00528763		2068.18	-0.00580112		2598.18	-0.00160984		3128.17	-0.0035159		3658.17	0.00913415		4188.17	0.00282697
478.4	0.00940527		1008.39	0.00295924		1538.39	0.00637428		2068.38	-0.00481622		2598.38	-0.00177644		3128.37	-0.00408147		3658.37	0.0096445		4188.37	0.00305233
478.6	0.00949318		1008.59	0.00341745		1538.59	0.00691117		2068.58	-0.00466578		2598.58	-0.00202387		3128.57	-0.00384617		3658.57	0.00954942		4188.57	0.00281048
478.8	0.00934906		1008.79	0.0037748		1538.79	0.00738773		2068.78	-0.00452152		2598.78	-0.00182389		3128.77	-0.00392404		3658.77	0.00930508		4188.77	0.0028338
479	0.00908723		1008.99	0.00478826		1538.99	0.00852341		2068.98	-0.00403782		2598.98	-0.00118849		3128.97	-0.00315152		3658.97	0.00840409		4188.97	0.00234497
479.2	0.00908441		1009.19	0.00441984		1539.19	0.00899019		2069.18	-0.00430388		2599.18	-0.00140313		3129.17	-0.00331018		3659.17	0.00873588		4189.17	0.00246421
479.4	0.00843526		1009.39	0.00382193		1539.39	0.00920793		2069.38	-0.00354407		2599.38	-0.00099326		3129.37	-0.00326752		3659.37	0.00923092		4189.37	0.0020581
479.6	0.0074684		1009.59	0.00393119		1539.59	0.00956966		2069.58	-0.00381107		2599.58	-0.00015444		3129.57	-0.00379656		3659.57	0.00922685		4189.57	0.00115133
479.8	0.00696423		1009.79	0.00363462		1539.79	0.00989372		2069.78	-0.00373739		2599.78	0.00101595		3129.77	-0.00290384		3659.77	0.00925014		4189.77	0.00080584
480	0.00710208		1009.99	0.00304635		1539.99	0.00961596		2069.98	-0.00341774		2599.98	0.00197615		3129.97	-0.00242173		3659.97	0.00930607		4189.97	0.00081947
480.2	0.00707138		1010.19	0.0026762		1540.19	0.00968517		2070.18	-0.00317655		2600.18	0.00212955		3130.17	-0.00306904		3660.17	0.00901757		4190.17	0.00031067
480.4	0.00621351		1010.39	0.00330127		1540.39	0.00989842		2070.38	-0.00427114		2600.38	0.00237018		3130.37	-0.00325351		3660.37	0.009262		4190.37	0.00013066
480.6	0.00565349		1010.59	0.00173492		1540.59	0.01029165		2070.58	-0.00346782		2600.58	0.00237998		3130.57	-0.00426077		3660.57	0.00994223		4190.57	0.00017766
480.8	0.00567427		1010.79	0.00181227		1540.79	0.01042175		2070.78	-0.00342642		2600.78	0.00188384		3130.77	-0.00436247		3660.77	0.01004888		4190.77	-0.00035615
481	0.00573064		1010.99	0.00089554		1540.99	0.01021193		2070.98	-0.00291808		2600.98	0.00173754		3130.97	-0.00374066		3660.97	0.0102111		4190.97	-0.00025584
481.2	0.005502		1011.19	0.00058031		1541.19	0.01006659		2071.18	-0.00233394		2601.18	0.00167807		3131.17	-0.00397432		3661.17	0.00982388		4191.17	-0.00026998
481.4	0.00619353		1011.39	0.00060721		1541.39	0.01054572		2071.38	-0.00215778		2601.38	0.00169764		3131.37	-0.00380919		3661.37	0.01040308		4191.37	-0.0004114
481.6	0.00645519		1011.59	0.00012213		1541.59	0.01082756		2071.58	-0.00180497		2601.58	0.00128908		3131.57	-0.00268399		3661.57	0.00960997		4191.57	-0.00003792
481.8	0.00670555		1011.79	0.00032387		1541.79	0.01054109		2071.78	-0.00286475		2601.78	0.00074451		3131.77	-0.00287576		3661.77	0.00961829		4191.77	-0.00034366
482	0.00754977		1011.99	0.00048389		1541.99	0.01076298		2071.98	-0.00379741		2601.98	-0.00010297		3131.97	-0.00280748		3661.97	0.00907177		4191.97	0.00067201
482.2	0.00738679		1012.19	0.00043387		1542.19	0.0110758		2072.18	-0.00333066		2602.18	-0.0006221		3132.17	-0.00289217		3662.17	0.00944489		4192.17	0.00058653
482.4	0.00770143		1012.39	0.00055666		1542.39	0.01156381		2072.38	-0.00376015		2602.38	-0.00115864		3132.37	-0.00252403		3662.37	0.00944355		4192.37	0.00027552
482.6	0.00806391		1012.59	0.00073478		1542.59	0.01064987		2072.58	-0.00410884		2602.58	-0.001858		3132.57	-0.00120491		3662.57	0.00752275		4192.57	-0.00052048
482.8	0.00892385		1012.79	0.00224851		1542.79	0.01068043		2072.78	-0.00391169		2602.78	-0.00121728		3132.77	-0.00122799		3662.77	0.00819176		4192.77	-0.00006192
483	0.00953113		1012.99	0.00289304		1542.99	0.01118411		2072.98	-0.00425547		2602.98	-0.0008886		3132.97	-0.00095301		3662.97	0.00761987		4192.97	0.00016784
483.2	0.00926554		1013.19	0.00254962		1543.19	0.00973233		2073.18	-0.00430816		2603.18	-0.0005302		3133.17	-0.00154144		3663.17	0.00835596		4193.17	0.00042619
483.4	0.00970616		1013.39	0.00296822		1543.39	0.00945504		2073.38	-0.00436688		2603.38	0.00000949		3133.37	-0.00200867		3663.37	0.00897758		4193.37	0.00107872
483.6	0.00961733		1013.59	0.00394018		1543.59	0.00945031		2073.58	-0.00433323		2603.58	0.00050069		3133.57	-0.00218936		3663.57	0.00890287		4193.57	0.00030255
483.8	0.00914225		1013.79	0.00427447		1543.79	0.00922658		2073.78	-0.00383514		2603.78	0.00100217		3133.77	-0.00212167		3663.77	0.00879089		4193.77	0.00050712
484	0.00988919		1013.99	0.00403151		1543.99	0.00909412		2073.98	-0.00407457		2603.98	0.00130512		3133.97	-0.00354632		3663.97	0.0086617		4193.97	-0.00021717
484.2	0.0092271		1014.19	0.00348696		1544.19	0.01006595		2074.18	-0.00435553		2604.18	0.00107086		3134.17	-0.00392381		3664.17	0.00863956		4194.17	-0.00074305
484.4	0.00864514		1014.39	0.0037886		1544.39	0.01013715		2074.38	-0.00508932		2604.38	0.000755		3134.37	-0.00435185		3664.37	0.00908267		4194.37	0.00001976
484.6	0.00893314		1014.59	0.00276288		1544.59	0.00975191		2074.58	-0.00448055		2604.58	0.00046611		3134.57	-0.00488892		3664.57	0.00916039		4194.57	0.00005005
484.8	0.00914148		1014.79	0.00352246		1544.79	0.00868138		2074.78	-0.00435208		2604.78	-0.00001259		3134.77	-0.00423401		3664.77	0.00942821		4194.77	-0.00025456
485	0.00898845		1014.99	0.00411032		1544.99	0.0082575		2074.98	-0.00424221		2604.98	0.00055468		3134.97	-0.00342591		3664.97	0.00991451		4194.97	-0.00035894
485.2	0.00850724		1015.19	0.00441059		1545.19	0.00942998		2075.18	-0.00452846		2605.18	0.00070303		3135.17	-0.00311433		3665.17	0.01015705		4195.17	-0.00170954
485.4	0.00874087		1015.39	0.0045734		1545.39	0.00997427		2075.38	-0.00524052		2605.38	0.00051819		3135.37	-0.00185206		3665.37	0.01119134		4195.37	-0.0021491
485.6	0.00900498		1015.59	0.00481282		1545.59	0.00973056		2075.58	-0.0058502		2605.58	0.00078539		3135.57	-0.00148967		3665.57	0.01060412		4195.57	-0.00140405
485.8	0.00849367		1015.79	0.0040578		1545.79	0.00945278		2075.78	-0.00709459		2605.78	0.00061835		3135.77	-0.00185289		3665.77	0.0106316		4195.77	-0.00149262
486	0.00801692		1015.99	0.00346643		1545.99	0.00921545		2075.98	-0.00720506		2605.98	0.00021765		3135.97	-0.00139223		3665.97	0.01010086		4195.97	-0.00150323
486.2	0.00744178		1016.19	0.00298174		1546.19	0.00854262		2076.18	-0.00645242		2606.18	0.00018841		3136.17	-0.00119046		3666.17	0.01091402		4196.17	-0.00237903
486.4	0.00727789		1016.39	0.00226988		1546.39	0.00853297		2076.38	-0.00628622		2606.38	0.00013036		3136.37	-0.00086999		3666.37	0.01123633		4196.37	-0.00286016
486.6	0.00720351		1016.59	0.0014833		1546.59	0.00823001		2076.58	-0.00484897		2606.58	-0.00013957		3136.57	-0.00058503		3666.57	0.01073415		4196.57	-0.00360684
486.8	0.0072384		1016.79	0.00177317		1546.79	0.00838179		2076.78	-0.00471815		2606.78	-0.00017352		3136.77	-0.00136876		3666.77	0.01199721		4196.77	-0.00330318
487	0.00746342		1016.99	0.00103666		1546.99	0.00840981		2076.98	-0.00448114		2606.98	0.00002076		3136.97	-0.00133661		3666.97	0.01131032		4196.97	-0.00389847
487.2	0.00809431		1017.19	0.00067347		1547.19	0.00780036		2077.18	-0.00381619		2607.18	-0.00001231		3137.17	-0.00117963		3667.17	0.01182134		4197.17	-0.00343465
487.4	0.0076148		1017.39	0.00023771		1547.39	0.00844658		2077.38	-0.00380241		2607.38	-0.00010922		3137.37	-0.0014259		3667.37	0.01216957		4197.37	-0.00284701
487.6	0.0072415		1017.59	-0.00092605		1547.59	0.00932574		2077.58	-0.00317293		2607.58	-0.00110348		3137.57	-0.00174673		3667.57	0.01143854		4197.57	-0.00323967
487.8	0.00638513		1017.79	-0.00089496		1547.79	0.00935826		2077.78	-0.00314371		2607.78	-0.00092236		3137.77	-0.00272625		3667.77	0.01120697		4197.77	-0.00293394
488	0.00711691		1017.99	-0.0011493		1547.99	0.0094771		2077.98	-0.00343981		2607.98	-0.001839		3137.97	-0.00357047		3667.97	0.01091085		4197.97	-0.00235604
488.2	0.00650413		1018.19	-0.00080513		1548.19	0.00987449		2078.18	-0.00368948		2608.18	-0.0023339		3138.17	-0.00303946		3668.17	0.00992875		4198.17	-0.00189615
488.4	0.0062821		1018.39	-0.00011093		1548.39	0.00905015		2078.38	-0.00434846		2608.38	-0.00238999		3138.37	-0.0030518		3668.37	0.0095308		4198.37	-0.00112014
488.6	0.00695176		1018.59	0.00042376		1548.59	0.00872636		2078.58	-0.0049731		2608.58	-0.00213589		3138.57	-0.0021666		3668.57	0.00893771		4198.57	0.00005469
488.8	0.00755843		1018.79	0.00082762		1548.79	0.00781335		2078.78	-0.00538229		2608.78	-0.00256387		3138.77	-0.00232848		3668.77	0.00819882		4198.77	0.00086818
489	0.00739644		1018.99	0.00180678		1548.99	0.00866912		2078.98	-0.00602832		2608.98	-0.00200455		3138.97	-0.00262746		3668.97	0.00863118		4198.97	0.00033378
489.2	0.0076409		1019.19	0.00238793		1549.19	0.00838332		2079.18	-0.00586139		2609.18	-0.00213126		3139.17	-0.00222779		3669.17	0.00850539		4199.17	0.00040262
489.4	0.00777131		1019.39	0.00239252		1549.39	0.00701134		2079.38	-0.00583907		2609.38	-0.00158088		3139.37	-0.00208742		3669.37	0.00842581		4199.37	0.00068149
489.6	0.00700628		1019.59	0.00313058		1549.59	0.00641834		2079.58	-0.00598117		2609.58	-0.00049148		3139.57	-0.00329086		3669.57	0.00779839		4199.57	0.00128897
489.8	0.00711226		1019.79	0.00322075		1549.79	0.00503475		2079.78	-0.00564533		2609.78	-0.00041911		3139.77	-0.00382731		3669.77	0.00802895		4199.77	0.0011451
490	0.00771298		1019.99	0.00330519		1549.99	0.00525597		2079.98	-0.00542237		2609.98	-0.00036949		3139.97	-0.00321439		3669.97	0.00875302		4199.97	0.00037832
490.2	0.0080356		1020.19	0.00327345		1550.19	0.00500124		2080.18	-0.00484094		2610.18	-0.0005196		3140.17	-0.00282672		3670.17	0.0098433		4200.17	0.0000463
490.4	0.00781963		1020.39	0.00350063		1550.39	0.00475002		2080.38	-0.0041178		2610.38	-0.00016749		3140.37	-0.00306414		3670.37	0.01093359		4200.37	0.00009768
490.6	0.00812418		1020.59	0.00357387		1550.59	0.00455484		2080.58	-0.00357835		2610.58	-0.00010762		3140.57	-0.00351438		3670.57	0.0109285		4200.57	-0.00026159
490.8	0.00838179		1020.79	0.00373926		1550.79	0.0044944		2080.78	-0.00423275		2610.78	-0.00010879		3140.77	-0.00354634		3670.77	0.01065904		4200.77	0.00024949
491	0.00890651		1020.99	0.00390974		1550.99	0.00475872		2080.98	-0.0037903		2610.98	0.00069077		3140.97	-0.00306615		3670.97	0.01016815		4200.97	0.0001765
491.2	0.00910289		1021.19	0.00330854		1551.19	0.00536174		2081.18	-0.00376097		2611.18	0.00100156		3141.17	-0.00302674		3671.17	0.01048578		4201.17	-0.00020577
491.4	0.00819065		1021.39	0.00213567		1551.39	0.0057579		2081.38	-0.00352551		2611.38	0.00097853		3141.37	-0.00367125		3671.37	0.01120055		4201.37	-0.00082706
491.6	0.00822596		1021.59	0.00217018		1551.59	0.00663029		2081.58	-0.00309055		2611.58	0.0011158		3141.57	-0.00378036		3671.57	0.01095897		4201.57	-0.00126543
491.8	0.00725944		1021.79	0.0028867		1551.79	0.006464		2081.78	-0.00314953		2611.78	0.00114002		3141.77	-0.00423596		3671.77	0.01114929		4201.77	-0.00165229
492	0.00737567		1021.99	0.00257274		1551.99	0.00722123		2081.98	-0.00376012		2611.98	0.00106045		3141.97	-0.00488663		3671.97	0.01070268		4201.97	-0.00176537
492.2	0.0068124		1022.19	0.00281076		1552.19	0.00687735		2082.18	-0.0042141		2612.18	0.0020564		3142.17	-0.00463714		3672.17	0.01009027		4202.17	-0.00201907
492.4	0.00610201		1022.39	0.00258236		1552.39	0.00643578		2082.38	-0.00446625		2612.38	0.00224887		3142.37	-0.00458313		3672.37	0.00953965		4202.37	-0.0012722
492.6	0.0058708		1022.59	0.00280919		1552.59	0.00756122		2082.58	-0.00525695		2612.58	0.00156443		3142.57	-0.00426131		3672.57	0.00831361		4202.57	-0.00097688
492.8	0.00618414		1022.79	0.00307877		1552.79	0.00716723		2082.78	-0.0054964		2612.78	0.00093268		3142.77	-0.00424853		3672.77	0.00706126		4202.77	-0.00180124
493	0.00517285		1022.99	0.00360066		1552.99	0.00750214		2082.98	-0.00493793		2612.98	0.0001561		3142.97	-0.00364593		3672.97	0.00745848		4202.97	-0.00291959
493.2	0.00553002		1023.19	0.0037439		1553.19	0.00722398		2083.18	-0.00338917		2613.18	-0.00009681		3143.17	-0.00310632		3673.17	0.00683974		4203.17	-0.00362941
493.4	0.00524506		1023.39	0.00399272		1553.39	0.00792734		2083.38	-0.00341807		2613.38	0.00020851		3143.37	-0.00359613		3673.37	0.00674203		4203.37	-0.00371823
493.6	0.00495005		1023.59	0.00480107		1553.59	0.00795503		2083.58	-0.00263201		2613.58	-0.00077941		3143.57	-0.00355902		3673.57	0.00766018		4203.57	-0.00360632
493.8	0.00673422		1023.79	0.00535006		1553.79	0.00774741		2083.78	-0.00164839		2613.78	-0.00180988		3143.77	-0.00289985		3673.77	0.00823856		4203.77	-0.00368163
494	0.00697397		1023.99	0.00516741		1553.99	0.0080013		2083.98	-0.00242612		2613.98	-0.00277028		3143.97	-0.00247896		3673.97	0.00859642		4203.97	-0.00365484
494.2	0.00708961		1024.19	0.00511413		1554.19	0.0076289		2084.18	-0.00171305		2614.18	-0.00288492		3144.17	-0.00292027		3674.17	0.00834033		4204.17	-0.00286624
494.4	0.00766247		1024.39	0.00565024		1554.39	0.00758568		2084.38	-0.00170432		2614.38	-0.003259		3144.37	-0.00290771		3674.37	0.00936218		4204.37	-0.00219153
494.6	0.0077008		1024.59	0.00488725		1554.59	0.00778375		2084.58	-0.00189293		2614.58	-0.00425991		3144.57	-0.00329474		3674.57	0.00884427		4204.57	-0.00207285
494.8	0.00792376		1024.79	0.00471677		1554.79	0.00805381		2084.78	-0.00221509		2614.78	-0.00474045		3144.77	-0.00331685		3674.77	0.00821035		4204.77	-0.00151665
495	0.00824188		1024.99	0.00395108		1554.99	0.00871128		2084.98	-0.002305		2614.98	-0.00381521		3144.97	-0.00320538		3674.97	0.00890554		4204.97	-0.00227203
495.2	0.00871636		1025.19	0.0029301		1555.19	0.00886136		2085.18	-0.00280844		2615.18	-0.00359565		3145.17	-0.00397798		3675.17	0.00923496		4205.17	-0.00264201
495.4	0.00878599		1025.39	0.00224243		1555.39	0.00756343		2085.38	-0.00322971		2615.38	-0.00325865		3145.37	-0.00425375		3675.37	0.0094034		4205.37	-0.00199066
495.6	0.00831287		1025.59	0.00134042		1555.59	0.00765954		2085.58	-0.00425734		2615.58	-0.0025079		3145.57	-0.00462027		3675.57	0.00921982		4205.57	-0.00083233
495.8	0.0085669		1025.79	0.00082462		1555.79	0.00732728		2085.78	-0.00484313		2615.78	-0.00201373		3145.77	-0.00526569		3675.77	0.00879074		4205.77	-0.00079473
496	0.00879564		1025.99	0.00087107		1555.99	0.00690038		2085.98	-0.00536011		2615.98	-0.00115938		3145.97	-0.00517891		3675.97	0.00834856		4205.97	-0.00075153
496.2	0.00825819		1026.19	0.0005563		1556.19	0.00557651		2086.18	-0.00583827		2616.18	-0.00040929		3146.17	-0.00393879		3676.17	0.00835716		4206.17	-0.00016371
496.4	0.00709986		1026.39	0.00035784		1556.39	0.00625701		2086.38	-0.00655025		2616.38	-0.00047748		3146.37	-0.00341736		3676.37	0.0081285		4206.37	0.00019402
496.6	0.0067199		1026.59	0.00058292		1556.59	0.00669305		2086.58	-0.00750014		2616.58	-0.00096933		3146.57	-0.00354209		3676.57	0.00796719		4206.57	-0.00057064
496.8	0.00658975		1026.79	0.00047364		1556.79	0.00532996		2086.78	-0.00819613		2616.78	-0.00086929		3146.77	-0.00360543		3676.77	0.00779687		4206.77	-0.00100066
497	0.00673645		1026.99	0.00035349		1556.99	0.00574345		2086.98	-0.00814839		2616.98	-0.00130635		3146.97	-0.00357805		3676.97	0.0089156		4206.97	-0.00167693
497.2	0.0071686		1027.19	0.00052765		1557.19	0.00602575		2087.18	-0.00770144		2617.18	-0.00077454		3147.17	-0.00407556		3677.17	0.00908976		4207.17	-0.00181179
497.4	0.00703957		1027.39	0.00116479		1557.39	0.0064905		2087.38	-0.00733823		2617.38	-0.00145164		3147.37	-0.00382982		3677.37	0.00999543		4207.37	-0.00106845
497.6	0.00644162		1027.59	0.0011543		1557.59	0.00609134		2087.58	-0.00689687		2617.58	-0.00224698		3147.57	-0.00326724		3677.57	0.01036946		4207.57	-0.00135044
497.8	0.00671826		1027.79	0.00133883		1557.79	0.00636271		2087.78	-0.00698317		2617.78	-0.00227449		3147.77	-0.00286465		3677.77	0.01090545		4207.77	-0.00151996
498	0.00576446		1027.99	0.00154383		1557.99	0.00603323		2087.98	-0.00684458		2617.98	-0.00232776		3147.97	-0.00340902		3677.97	0.01036992		4207.97	-0.00136398
498.2	0.00568356		1028.19	0.0011612		1558.19	0.00687929		2088.18	-0.00640872		2618.18	-0.00182931		3148.17	-0.00391679		3678.17	0.00958578		4208.17	-0.00215085
498.4	0.00600958		1028.39	0.00109794		1558.39	0.00772308		2088.38	-0.0066986		2618.38	-0.00264405		3148.37	-0.00364894		3678.37	0.0104366		4208.37	-0.00215773
498.6	0.0064179		1028.59	0.00048944		1558.59	0.00817851		2088.58	-0.00591776		2618.58	-0.00251083		3148.57	-0.00465936		3678.57	0.00950804		4208.57	-0.00272737
498.8	0.00638497		1028.79	0.0006517		1558.79	0.00872449		2088.78	-0.00580985		2618.78	-0.00240265		3148.77	-0.00520238		3678.77	0.01021168		4208.77	-0.0031168
499	0.00590926		1028.99	0.00078056		1558.99	0.0090271		2088.98	-0.00584224		2618.98	-0.00188108		3148.97	-0.00528492		3678.97	0.00981509		4208.97	-0.0036848
499.2	0.00634534		1029.19	0.00094701		1559.19	0.00898241		2089.18	-0.0062225		2619.18	-0.00229289		3149.17	-0.00510874		3679.17	0.00941594		4209.17	-0.00321832
499.4	0.00662289		1029.39	0.00087339		1559.39	0.00900508		2089.38	-0.00619585		2619.38	-0.00220406		3149.37	-0.00437871		3679.37	0.00890504		4209.37	-0.00232519
499.6	0.00605095		1029.59	0.00086577		1559.59	0.01066757		2089.58	-0.00642068		2619.58	-0.00240299		3149.57	-0.00430896		3679.57	0.00921535		4209.57	-0.00206544
499.8	0.00597427		1029.79	0.00210697		1559.79	0.01073144		2089.78	-0.00596665		2619.78	-0.00187987		3149.77	-0.00376976		3679.77	0.00862215		4209.77	-0.00244862
500	0.00580933		1029.99	0.00232136		1559.99	0.01037703		2089.98	-0.00556691		2619.98	-0.00223837		3149.97	-0.00328733		3679.97	0.00868795		4209.97	-0.00259419
500.2	0.00548788		1030.19	0.00188548		1560.19	0.01070664		2090.18	-0.00508758		2620.18	-0.00308589		3150.17	-0.00424953		3680.17	0.00956558		4210.17	-0.00235003
500.4	0.005228		1030.39	0.00202128		1560.39	0.01073211		2090.38	-0.00578092		2620.38	-0.00377473		3150.37	-0.00533735		3680.37	0.00969477		4210.37	-0.00300848
500.6	0.00595601		1030.59	0.00126617		1560.59	0.00997711		2090.58	-0.0060852		2620.58	-0.00390468		3150.57	-0.00606521		3680.57	0.009038		4210.57	-0.00338111
500.8	0.00588		1030.79	0.0007539		1560.79	0.01005677		2090.78	-0.00693204		2620.78	-0.00292903		3150.77	-0.00583831		3680.77	0.0083611		4210.77	-0.00329125
501	0.00713136		1030.99	0.00034168		1560.99	0.01047765		2090.98	-0.00664521		2620.98	-0.00308689		3150.97	-0.00574988		3680.97	0.00843865		4210.97	-0.00330832
501.2	0.00772984		1031.19	0.00105341		1561.19	0.0100635		2091.18	-0.00695532		2621.18	-0.00244922		3151.17	-0.00551765		3681.17	0.00779412		4211.17	-0.00334304
501.4	0.00770705		1031.39	0.00148598		1561.39	0.0110216		2091.38	-0.00718704		2621.38	-0.00203809		3151.37	-0.00431069		3681.37	0.00761919		4211.37	-0.0031285
501.6	0.00778792		1031.59	0.00139904		1561.59	0.01126159		2091.58	-0.00774613		2621.58	-0.00161511		3151.57	-0.00394537		3681.57	0.00716233		4211.57	-0.00290534
501.8	0.00814992		1031.79	0.00183706		1561.79	0.0113398		2091.78	-0.00812343		2621.78	-0.00077136		3151.77	-0.00442747		3681.77	0.00687318		4211.77	-0.00324848
502	0.00843241		1031.99	0.00128096		1561.99	0.01068402		2091.98	-0.00764812		2621.98	-0.00009466		3151.97	-0.00560286		3681.97	0.0060346		4211.97	-0.00384949
502.2	0.00943896		1032.19	0.00077519		1562.19	0.01146691		2092.18	-0.00823267		2622.18	0.00017184		3152.17	-0.0053712		3682.17	0.00596541		4212.17	-0.00433152
502.4	0.00960744		1032.39	0.00084209		1562.39	0.0120113		2092.38	-0.00788517		2622.38	-0.00051799		3152.37	-0.0042271		3682.37	0.00606434		4212.37	-0.00429941
502.6	0.00990851		1032.59	0.0006798		1562.59	0.0117135		2092.58	-0.00675045		2622.58	0.00000983		3152.57	-0.00381087		3682.57	0.00613813		4212.57	-0.00458386
502.8	0.00900185		1032.79	0.00145614		1562.79	0.01160093		2092.78	-0.00775796		2622.78	-0.0001316		3152.77	-0.00280023		3682.77	0.00730141		4212.77	-0.00380151
503	0.0091159		1032.99	0.00188216		1562.99	0.0118127		2092.98	-0.00734946		2622.98	-0.00066892		3152.97	-0.00206276		3682.97	0.00680583		4212.97	-0.00389245
503.2	0.00846817		1033.19	0.0023465		1563.19	0.01180848		2093.18	-0.00745777		2623.18	-0.00105733		3153.17	-0.00119183		3683.17	0.00755084		4213.17	-0.00220039
503.4	0.00751312		1033.39	0.00254118		1563.39	0.0124363		2093.38	-0.00757917		2623.38	-0.00072494		3153.37	-0.00076447		3683.37	0.00751902		4213.37	-0.00220386
503.6	0.0069728		1033.59	0.00293438		1563.59	0.01244233		2093.58	-0.00772377		2623.58	-0.00050085		3153.57	-0.00010604		3683.57	0.0081535		4213.57	-0.00272373
503.8	0.00667471		1033.79	0.00351334		1563.79	0.01145351		2093.78	-0.00733647		2623.78	-0.00075463		3153.77	-0.00034329		3683.77	0.00865129		4213.77	-0.00267001
504	0.0061793		1033.99	0.00363858		1563.99	0.01086646		2093.98	-0.00732572		2623.98	-0.00143027		3153.97	-0.00114461		3683.97	0.00894551		4213.97	-0.0030579
504.2	0.00619795		1034.19	0.00400283		1564.19	0.01022647		2094.18	-0.0076475		2624.18	-0.00211083		3154.17	-0.00183941		3684.17	0.0090035		4214.17	-0.00268953
504.4	0.00538744		1034.39	0.00359782		1564.39	0.00887562		2094.38	-0.00773657		2624.38	-0.00233423		3154.37	-0.00181374		3684.37	0.00901562		4214.37	-0.00243137
504.6	0.00569069		1034.59	0.00281657		1564.59	0.00827752		2094.58	-0.00778536		2624.58	-0.00263792		3154.57	-0.00173799		3684.57	0.00851092		4214.57	-0.00227832
504.8	0.00487722		1034.79	0.00228598		1564.79	0.00824002		2094.78	-0.00800866		2624.78	-0.00267259		3154.77	-0.00189717		3684.77	0.00861082		4214.77	-0.00204356
505	0.00477871		1034.99	0.00243435		1564.99	0.00864614		2094.98	-0.00792811		2624.98	-0.00312928		3154.97	-0.00154523		3684.97	0.0085731		4214.97	-0.00253728
505.2	0.00490121		1035.19	0.00341873		1565.19	0.00887201		2095.18	-0.00917861		2625.18	-0.00277718		3155.17	-0.0020948		3685.17	0.00890488		4215.17	-0.00278152
505.4	0.00421458		1035.39	0.00304814		1565.39	0.00928604		2095.38	-0.00923324		2625.38	-0.00321157		3155.37	-0.0023427		3685.37	0.00881829		4215.37	-0.00214737
505.6	0.00349005		1035.59	0.0027724		1565.59	0.00874887		2095.58	-0.00957264		2625.58	-0.0039203		3155.57	-0.00395881		3685.57	0.00936966		4215.57	-0.00129022
505.8	0.00286441		1035.79	0.0017903		1565.79	0.00864269		2095.78	-0.00910061		2625.78	-0.00476714		3155.77	-0.00521225		3685.77	0.00939056		4215.77	-0.00144808
506	0.0037299		1035.99	0.00123074		1565.99	0.00819426		2095.98	-0.00794639		2625.98	-0.00608474		3155.97	-0.00635848		3685.97	0.00905526		4215.97	-0.00236274
506.2	0.00438398		1036.19	0.00140613		1566.19	0.00890013		2096.18	-0.00727608		2626.18	-0.00607654		3156.17	-0.00630783		3686.17	0.00856202		4216.17	-0.00251874
506.4	0.00420849		1036.39	0.00061414		1566.39	0.00889822		2096.38	-0.00663972		2626.38	-0.00623421		3156.37	-0.00604599		3686.37	0.00855377		4216.37	-0.00239612
506.6	0.00482525		1036.59	-0.00031006		1566.59	0.0086125		2096.58	-0.0056204		2626.58	-0.00566952		3156.57	-0.00702742		3686.57	0.00893503		4216.57	-0.00162452
506.8	0.00481181		1036.79	0.00046241		1566.79	0.00884546		2096.78	-0.00558359		2626.78	-0.00570592		3156.77	-0.0075926		3686.77	0.00979595		4216.77	-0.00093786
507	0.00560053		1036.99	0.00066445		1566.99	0.00818815		2096.98	-0.00443812		2626.98	-0.00626059		3156.97	-0.00768939		3686.97	0.00873489		4216.97	-0.00098144
507.2	0.00520169		1037.19	0.001386		1567.19	0.00800412		2097.18	-0.00358824		2627.18	-0.00580492		3157.17	-0.00748608		3687.17	0.00852704		4217.17	-0.00062815
507.4	0.00614326		1037.39	0.00087191		1567.39	0.00786695		2097.38	-0.0036545		2627.38	-0.00540014		3157.37	-0.00762816		3687.37	0.0082794		4217.37	-0.00173146
507.6	0.00684065		1037.59	0.00087103		1567.59	0.00739075		2097.58	-0.00297232		2627.58	-0.00494615		3157.57	-0.0078795		3687.57	0.00808322		4217.57	-0.00147396
507.8	0.00705803		1037.79	0.00072362		1567.79	0.00700038		2097.78	-0.00267919		2627.78	-0.0050177		3157.77	-0.00808295		3687.77	0.00815103		4217.77	-0.00031199
508	0.00734235		1037.99	0.00134404		1567.99	0.00698357		2097.98	-0.00267262		2627.98	-0.00448735		3157.97	-0.00797167		3687.97	0.0077204		4217.97	-0.00016252
508.2	0.00854753		1038.19	0.00217154		1568.19	0.00661957		2098.18	-0.00256243		2628.18	-0.00440136		3158.17	-0.00713934		3688.17	0.0076781		4218.17	-0.00036815
508.4	0.00894459		1038.39	0.00246678		1568.39	0.00665139		2098.38	-0.0024203		2628.38	-0.00387748		3158.37	-0.00679185		3688.37	0.00794783		4218.37	-0.00042985
508.6	0.00952722		1038.59	0.00204487		1568.59	0.00649112		2098.58	-0.00324215		2628.58	-0.00371014		3158.57	-0.00596394		3688.57	0.00802306		4218.57	-0.00156736
508.8	0.00883313		1038.79	0.00170266		1568.79	0.00738217		2098.78	-0.00379833		2628.78	-0.00307622		3158.77	-0.0051558		3688.77	0.00801503		4218.77	-0.00216093
509	0.00901175		1038.99	0.00253326		1568.99	0.00729867		2098.98	-0.00443493		2628.98	-0.00224805		3158.97	-0.0044467		3688.97	0.00778225		4218.97	-0.00282081
509.2	0.0087066		1039.19	0.00255358		1569.19	0.00612845		2099.18	-0.00539756		2629.18	-0.00169845		3159.17	-0.00470425		3689.17	0.00814897		4219.17	-0.00236452
509.4	0.00796044		1039.39	0.00172107		1569.39	0.00516882		2099.38	-0.00553267		2629.38	-0.00222107		3159.37	-0.0039215		3689.37	0.00801314		4219.37	-0.00167378
509.6	0.00682088		1039.59	0.00177793		1569.59	0.00450591		2099.58	-0.00570313		2629.58	-0.00266497		3159.57	-0.00460343		3689.57	0.00858744		4219.57	-0.00157878
509.8	0.00674012		1039.79	0.00150787		1569.79	0.00439654		2099.78	-0.0058522		2629.78	-0.00277522		3159.77	-0.00422129		3689.77	0.008294		4219.77	-0.00223858
510	0.00793746		1039.99	0.00148765		1569.99	0.0037058		2099.98	-0.00648592		2629.98	-0.00255946		3159.97	-0.00391005		3689.97	0.00733856		4219.97	-0.00321777
510.2	0.00765128		1040.19	0.00145676		1570.19	0.00433197		2100.18	-0.00636941		2630.18	-0.0012385		3160.17	-0.00356314		3690.17	0.00710227		4220.17	-0.00376942
510.4	0.00714431		1040.39	0.00129633		1570.39	0.00395684		2100.38	-0.0060206		2630.38	-0.00130841		3160.37	-0.00322529		3690.37	0.00737617		4220.37	-0.00302493
510.6	0.00663381		1040.59	0.00089211		1570.59	0.00389984		2100.58	-0.00491576		2630.58	-0.0017226		3160.57	-0.0037082		3690.57	0.00837926		4220.57	-0.00219016
510.8	0.00622272		1040.79	0.00180272		1570.79	0.00323523		2100.78	-0.00438514		2630.78	-0.00166698		3160.77	-0.0035689		3690.77	0.00888567		4220.77	-0.00226653
511	0.00578903		1040.99	0.00153862		1570.99	0.00292164		2100.98	-0.00353801		2630.98	-0.00171644		3160.97	-0.00354044		3690.97	0.00800219		4220.97	-0.00235316
511.2	0.00490734		1041.19	0.00156898		1571.19	0.00356842		2101.18	-0.00248635		2631.18	-0.00116795		3161.17	-0.00413828		3691.17	0.00830375		4221.17	-0.00318149
511.4	0.00448499		1041.39	0.00063438		1571.39	0.00458892		2101.38	-0.00312959		2631.38	-0.00143927		3161.37	-0.00410017		3691.37	0.00821973		4221.37	-0.00240106
511.6	0.00361298		1041.59	0.0007176		1571.59	0.00525405		2101.58	-0.00277489		2631.58	-0.00144481		3161.57	-0.00393004		3691.57	0.00758455		4221.57	-0.00217457
511.8	0.0037915		1041.79	0.00126761		1571.79	0.00580497		2101.78	-0.00300285		2631.78	-0.00222562		3161.77	-0.00398417		3691.77	0.00779244		4221.77	-0.00149757
512	0.00432695		1041.99	0.00249099		1571.99	0.00678915		2101.98	-0.00401613		2631.98	-0.00230988		3161.97	-0.00382814		3691.97	0.00811175		4221.97	-0.00217332
512.2	0.00529205		1042.19	0.00230292		1572.19	0.00731391		2102.18	-0.0044161		2632.18	-0.00203715		3162.17	-0.00378488		3692.17	0.00819803		4222.17	-0.00290872
512.4	0.00552676		1042.39	0.00207803		1572.39	0.00805188		2102.38	-0.00481083		2632.38	-0.00193672		3162.37	-0.00404173		3692.37	0.00786053		4222.37	-0.002938
512.6	0.00591611		1042.59	0.00152401		1572.59	0.00741746		2102.58	-0.00514776		2632.58	-0.00184498		3162.57	-0.00404773		3692.57	0.00697184		4222.57	-0.00379219
512.8	0.00594132		1042.79	0.00149187		1572.79	0.00682266		2102.78	-0.00508031		2632.78	-0.00158385		3162.77	-0.00471929		3692.77	0.00601176		4222.77	-0.0029103
513	0.00661036		1042.99	0.00191974		1572.99	0.0059002		2102.98	-0.00564367		2632.98	-0.00206823		3162.97	-0.00529425		3692.97	0.00570198		4222.97	-0.00255507
513.2	0.00705639		1043.19	0.00194216		1573.19	0.00603957		2103.18	-0.00609464		2633.18	-0.00283219		3163.17	-0.00530508		3693.17	0.00541143		4223.17	-0.00252904
513.4	0.00731948		1043.39	0.00144229		1573.39	0.00494026		2103.38	-0.00601176		2633.38	-0.0038652		3163.37	-0.00546185		3693.37	0.00510711		4223.37	-0.00251646
513.6	0.00786477		1043.59	0.00163363		1573.59	0.00452761		2103.58	-0.00700136		2633.58	-0.00448023		3163.57	-0.00577075		3693.57	0.005423		4223.57	-0.00292378
513.8	0.00870191		1043.79	0.00112084		1573.79	0.00459498		2103.78	-0.00743135		2633.78	-0.00482588		3163.77	-0.00524815		3693.77	0.00524193		4223.77	-0.0031135
514	0.00938647		1043.99	0.00131054		1573.99	0.00443314		2103.98	-0.00787676		2633.98	-0.00537553		3163.97	-0.00452356		3693.97	0.00535941		4223.97	-0.0039492
514.2	0.00979903		1044.19	0.00185904		1574.19	0.00493074		2104.18	-0.00709791		2634.18	-0.00511521		3164.17	-0.00529683		3694.17	0.00621757		4224.17	-0.00413789
514.4	0.00952183		1044.39	0.00148009		1574.39	0.00441723		2104.38	-0.00645023		2634.38	-0.00528747		3164.37	-0.00497069		3694.37	0.0071489		4224.37	-0.00310035
514.6	0.00968802		1044.59	0.00103348		1574.59	0.00422253		2104.58	-0.00657223		2634.58	-0.00534212		3164.57	-0.00554747		3694.57	0.00867747		4224.57	-0.00282257
514.8	0.00858893		1044.79	0.00154819		1574.79	0.00443055		2104.78	-0.00638624		2634.78	-0.00477311		3164.77	-0.00504251		3694.77	0.00846384		4224.77	-0.00325263
515	0.00763278		1044.99	0.00151756		1574.99	0.00535005		2104.98	-0.00561157		2634.98	-0.00496524		3164.97	-0.00472005		3694.97	0.00824321		4224.97	-0.00312302
515.2	0.00725399		1045.19	0.00207118		1575.19	0.00531612		2105.18	-0.00550906		2635.18	-0.00540968		3165.17	-0.0045995		3695.17	0.00909291		4225.17	-0.00435513
515.4	0.00654167		1045.39	0.00185572		1575.39	0.00598959		2105.38	-0.00583918		2635.38	-0.00582937		3165.37	-0.00414394		3695.37	0.00993316		4225.37	-0.00341201
515.6	0.0056309		1045.59	0.00240116		1575.59	0.0058575		2105.58	-0.0057552		2635.58	-0.00627028		3165.57	-0.00484273		3695.57	0.01024832		4225.57	-0.00379779
515.8	0.00574993		1045.79	0.00307161		1575.79	0.00642735		2105.78	-0.00589713		2635.78	-0.00558127		3165.77	-0.00506535		3695.77	0.01059873		4225.77	-0.00390707
516	0.00572352		1045.99	0.00248749		1575.99	0.00668554		2105.98	-0.00605115		2635.98	-0.00493367		3165.97	-0.00468962		3695.97	0.01069688		4225.97	-0.00426659
516.2	0.00487237		1046.19	0.00189118		1576.19	0.00710614		2106.18	-0.00542546		2636.18	-0.00465738		3166.17	-0.00509456		3696.17	0.01018301		4226.17	-0.00436453
516.4	0.00475411		1046.39	0.00193035		1576.39	0.00684002		2106.38	-0.00565105		2636.38	-0.00356635		3166.37	-0.0051635		3696.37	0.00932335		4226.37	-0.00463845
516.6	0.00363945		1046.59	0.00215537		1576.59	0.00604471		2106.58	-0.005701		2636.58	-0.00247065		3166.57	-0.00542198		3696.57	0.00893928		4226.57	-0.00409758
516.8	0.00293732		1046.79	0.00185908		1576.79	0.00609173		2106.78	-0.00560676		2636.78	-0.0025536		3166.77	-0.00609641		3696.77	0.00901431		4226.77	-0.0033956
517	0.0028274		1046.99	0.00173301		1576.99	0.00702659		2106.98	-0.00588032		2636.98	-0.003466		3166.97	-0.00559756		3696.97	0.009101		4226.97	-0.00402169
517.2	0.0033632		1047.19	0.00203848		1577.19	0.00738063		2107.18	-0.00620623		2637.18	-0.00326681		3167.17	-0.00535753		3697.17	0.00884127		4227.17	-0.00453996
517.4	0.00353187		1047.39	0.00020933		1577.39	0.00620367		2107.38	-0.00648066		2637.38	-0.00280649		3167.37	-0.00564635		3697.37	0.00978637		4227.37	-0.00381317
517.6	0.00434462		1047.59	-0.00010105		1577.59	0.00664956		2107.58	-0.00677436		2637.58	-0.00327004		3167.57	-0.00466266		3697.57	0.00995618		4227.57	-0.00430266
517.8	0.00466225		1047.79	-0.00038065		1577.79	0.00682605		2107.78	-0.00689384		2637.78	-0.00290311		3167.77	-0.00404753		3697.77	0.00980295		4227.77	-0.00465056
518	0.00409637		1047.99	-0.00010926		1577.99	0.00666392		2107.98	-0.00734484		2637.98	-0.0024183		3167.97	-0.00317841		3697.97	0.00976307		4227.97	-0.00485781
518.2	0.00409802		1048.19	-0.00063171		1578.19	0.00630112		2108.18	-0.00742003		2638.18	-0.00117785		3168.17	-0.00286152		3698.17	0.00944565		4228.17	-0.00456912
518.4	0.00400071		1048.39	-0.00132352		1578.39	0.00616027		2108.38	-0.00748695		2638.38	-0.00102087		3168.37	-0.00219728		3698.37	0.00886986		4228.37	-0.00432792
518.6	0.00445496		1048.59	-0.00120245		1578.59	0.00562486		2108.58	-0.0078828		2638.58	-0.00108357		3168.57	-0.00226284		3698.57	0.00892411		4228.57	-0.00427914
518.8	0.00407884		1048.79	-0.00163617		1578.79	0.00579734		2108.78	-0.00774363		2638.78	-0.00143147		3168.77	-0.00184506		3698.77	0.00736373		4228.77	-0.00470432
519	0.00450621		1048.99	-0.00169965		1578.99	0.00587639		2108.98	-0.00661553		2638.98	-0.00191453		3168.97	-0.0014284		3698.97	0.00699347		4228.97	-0.0043566
519.2	0.00457782		1049.19	-0.00173704		1579.19	0.00539522		2109.18	-0.00603149		2639.18	-0.00171322		3169.17	-0.00226589		3699.17	0.0077156		4229.17	-0.00505392
519.4	0.00470222		1049.39	-0.00133416		1579.39	0.00567588		2109.38	-0.00507166		2639.38	-0.00166642		3169.37	-0.0029481		3699.37	0.00693747		4229.37	-0.00454711
519.6	0.0046457		1049.59	-0.0005945		1579.59	0.00510183		2109.58	-0.00476065		2639.58	-0.00206742		3169.57	-0.00328184		3699.57	0.00626111		4229.57	-0.00488904
519.8	0.0053816		1049.79	0.00009309		1579.79	0.00537353		2109.78	-0.00393827		2639.78	-0.00176615		3169.77	-0.00351536		3699.77	0.00594026		4229.77	-0.00465509
520	0.0051997		1049.99	-0.0005635		1579.99	0.00492534		2109.98	-0.00312676		2639.98	-0.00262126		3169.97	-0.00368676		3699.97	0.00519237		4229.97	-0.00450102
520.2	0.00500812		1050.19	-0.00027435		1580.19	0.00518854		2110.18	-0.00282987		2640.18	-0.00270687		3170.17	-0.00407855		3700.17	0.00473857		4230.17	-0.00484121
520.4	0.00628159		1050.39	0.00016337		1580.39	0.00519395		2110.38	-0.00254173		2640.38	-0.00228852		3170.37	-0.00481472		3700.37	0.00531609		4230.37	-0.00517821
520.6	0.00496838		1050.59	0.00034392		1580.59	0.00619114		2110.58	-0.00180193		2640.58	-0.00234908		3170.57	-0.0055589		3700.57	0.00616244		4230.57	-0.00452191
520.8	0.00576725		1050.79	0.00042793		1580.79	0.00649522		2110.78	-0.00189489		2640.78	-0.00313086		3170.77	-0.00552365		3700.77	0.00683023		4230.77	-0.00439739
521	0.00613778		1050.99	0.00090883		1580.99	0.00642889		2110.98	-0.0023854		2640.98	-0.00310203		3170.97	-0.00539699		3700.97	0.00782787		4230.97	-0.00458765
521.2	0.00592327		1051.19	0.00173512		1581.19	0.00578176		2111.18	-0.0029521		2641.18	-0.0029178		3171.17	-0.00589067		3701.17	0.00841488		4231.17	-0.0046307
521.4	0.00570029		1051.39	0.00079908		1581.39	0.00532568		2111.38	-0.00292793		2641.38	-0.0030566		3171.37	-0.00605227		3701.37	0.00917568		4231.37	-0.00420671
521.6	0.00432259		1051.59	0.00167687		1581.59	0.00588487		2111.58	-0.00378229		2641.58	-0.00361788		3171.57	-0.0052777		3701.57	0.00789085		4231.57	-0.00462803
521.8	0.00333609		1051.79	0.00138218		1581.79	0.00629802		2111.78	-0.00487469		2641.78	-0.00373345		3171.77	-0.00546402		3701.77	0.0080866		4231.77	-0.00393898
522	0.00231215		1051.99	0.00121775		1581.99	0.00653581		2111.98	-0.00484793		2641.98	-0.00388427		3171.97	-0.0054343		3701.97	0.00865631		4231.97	-0.00397952
522.2	0.00201843		1052.19	0.00104702		1582.19	0.00641359		2112.18	-0.00540058		2642.18	-0.003669		3172.17	-0.00587995		3702.17	0.00827709		4232.17	-0.0035471
522.4	0.00220803		1052.39	0.00116901		1582.39	0.00697328		2112.38	-0.00567933		2642.38	-0.00445931		3172.37	-0.00578491		3702.37	0.00793921		4232.37	-0.00342001
522.6	0.00234838		1052.59	0.00106837		1582.59	0.00631988		2112.58	-0.00626642		2642.58	-0.00518302		3172.57	-0.00541884		3702.57	0.00770373		4232.57	-0.00380335
522.8	0.00158986		1052.79	0.00042322		1582.79	0.00636122		2112.78	-0.00641403		2642.78	-0.00607		3172.77	-0.00449575		3702.77	0.00709275		4232.77	-0.00462774
523	0.0008154		1052.99	-0.00001294		1582.99	0.00520676		2112.98	-0.00538405		2642.98	-0.00635388		3172.97	-0.00398215		3702.97	0.00797905		4232.97	-0.00404364
523.2	0.000888		1053.19	0.00005998		1583.19	0.00435288		2113.18	-0.00557301		2643.18	-0.00595235		3173.17	-0.0045295		3703.17	0.007978		4233.17	-0.00453727
523.4	0.00115439		1053.39	0.0000475		1583.39	0.00343576		2113.38	-0.00508299		2643.38	-0.00732312		3173.37	-0.00334642		3703.37	0.00752808		4233.37	-0.0046586
523.6	0.00173145		1053.59	-0.00076903		1583.59	0.00313751		2113.58	-0.0056357		2643.58	-0.00787365		3173.57	-0.00249789		3703.57	0.00726372		4233.57	-0.00428491
523.8	0.00245979		1053.79	-0.00094743		1583.79	0.00335435		2113.78	-0.00528261		2643.78	-0.00798702		3173.77	-0.00234771		3703.77	0.00709362		4233.77	-0.00389292
524	0.00203293		1053.99	-0.00148173		1583.99	0.00310159		2113.98	-0.00483638		2643.98	-0.00807515		3173.97	-0.00224043		3703.97	0.00635385		4233.97	-0.00454192
524.2	0.00307858		1054.19	-0.00148603		1584.19	0.00284267		2114.18	-0.00502777		2644.18	-0.00698383		3174.17	-0.00294001		3704.17	0.00701975		4234.17	-0.0053017
524.4	0.00412499		1054.39	-0.00163361		1584.39	0.00346186		2114.38	-0.00429083		2644.38	-0.00610219		3174.37	-0.00322824		3704.37	0.00771095		4234.37	-0.0053191
524.6	0.00380176		1054.59	-0.00176551		1584.59	0.00381697		2114.58	-0.00410524		2644.58	-0.00457805		3174.57	-0.00225225		3704.57	0.00726464		4234.57	-0.00507864
524.8	0.00415382		1054.79	-0.00202968		1584.79	0.00400341		2114.78	-0.00532684		2644.78	-0.00335174		3174.77	-0.00264312		3704.77	0.00818886		4234.77	-0.00574617
525	0.00408939		1054.99	-0.00257487		1584.99	0.00391839		2114.98	-0.00624071		2644.98	-0.00190944		3174.97	-0.00312576		3704.97	0.00847251		4234.97	-0.00558391
525.2	0.00323157		1055.19	-0.00257008		1585.19	0.00526645		2115.18	-0.00690767		2645.18	-0.00137502		3175.17	-0.00267079		3705.17	0.00766963		4235.17	-0.00537655
525.4	0.00325831		1055.39	-0.00391394		1585.39	0.00651194		2115.38	-0.00750491		2645.38	-0.00158313		3175.37	-0.00317056		3705.37	0.00705392		4235.37	-0.00446317
525.6	0.00317677		1055.59	-0.00409028		1585.59	0.00787836		2115.58	-0.0084728		2645.58	-0.00093688		3175.57	-0.00416768		3705.57	0.00617256		4235.57	-0.0041077
525.8	0.00398852		1055.79	-0.00425122		1585.79	0.00879467		2115.78	-0.00733543		2645.78	-0.00104379		3175.77	-0.00454302		3705.77	0.0064237		4235.77	-0.00434351
526	0.00340902		1055.99	-0.00392637		1585.99	0.00931212		2115.98	-0.00676022		2645.98	-0.00069392		3175.97	-0.00539987		3705.97	0.00556744		4235.97	-0.00452647
526.2	0.00300294		1056.19	-0.00303664		1586.19	0.0094275		2116.18	-0.00678805		2646.18	-0.00085638		3176.17	-0.005816		3706.17	0.00455418		4236.17	-0.00421716
526.4	0.00272912		1056.39	-0.00208894		1586.39	0.00921606		2116.38	-0.00631415		2646.38	-0.00167662		3176.37	-0.00479921		3706.37	0.00452011		4236.37	-0.00456967
526.6	0.00267395		1056.59	-0.00131768		1586.59	0.00902048		2116.58	-0.006139		2646.58	-0.00199586		3176.57	-0.00506262		3706.57	0.00444111		4236.57	-0.00417259
526.8	0.00219809		1056.79	-0.00103961		1586.79	0.00813617		2116.78	-0.00630862		2646.78	-0.00257251		3176.77	-0.00558289		3706.77	0.00440669		4236.77	-0.00399835
527	0.00244559		1056.99	-0.00088829		1586.99	0.00718372		2116.98	-0.00595078		2646.98	-0.00170169		3176.97	-0.00610109		3706.97	0.00495736		4236.97	-0.00319631
527.2	0.0028755		1057.19	-0.00004054		1587.19	0.00736439		2117.18	-0.0066884		2647.18	-0.00194104		3177.17	-0.00596424		3707.17	0.00428543		4237.17	-0.0032486
527.4	0.00308529		1057.39	0.00045237		1587.39	0.00770423		2117.38	-0.00654393		2647.38	-0.00333302		3177.37	-0.00478998		3707.37	0.00386942		4237.37	-0.00328179
527.6	0.00319719		1057.59	0.00048088		1587.59	0.00803306		2117.58	-0.007062		2647.58	-0.00395459		3177.57	-0.00412873		3707.57	0.00403937		4237.57	-0.00279209
527.8	0.00308674		1057.79	0.00116279		1587.79	0.00756491		2117.78	-0.00604451		2647.78	-0.00403559		3177.77	-0.00388068		3707.77	0.00510779		4237.77	-0.00329289
528	0.00329336		1057.99	0.0013955		1587.99	0.00773785		2117.98	-0.00588953		2647.98	-0.00407584		3177.97	-0.00428984		3707.97	0.00555299		4237.97	-0.00370256
528.2	0.00397784		1058.19	0.0010308		1588.19	0.00738869		2118.18	-0.0062868		2648.18	-0.00282045		3178.17	-0.00397831		3708.17	0.00596335		4238.17	-0.00424648
528.4	0.00445621		1058.39	0.00125201		1588.39	0.00794145		2118.38	-0.00640598		2648.38	-0.00254367		3178.37	-0.00329871		3708.37	0.00562815		4238.37	-0.00472896
528.6	0.00392494		1058.59	0.00111538		1588.59	0.0080129		2118.58	-0.00697069		2648.58	-0.00248537		3178.57	-0.00258857		3708.57	0.00595491		4238.57	-0.00477658
528.8	0.00422906		1058.79	0.00127611		1588.79	0.00768677		2118.78	-0.00806457		2648.78	-0.00266269		3178.77	-0.00366428		3708.77	0.00719264		4238.77	-0.00500588
529	0.00424891		1058.99	0.00111868		1588.99	0.00752398		2118.98	-0.00849882		2648.98	-0.00265141		3178.97	-0.00308139		3708.97	0.00729569		4238.97	-0.00392288
529.2	0.00389894		1059.19	0.00122282		1589.19	0.00794893		2119.18	-0.0083377		2649.18	-0.00339608		3179.17	-0.00288809		3709.17	0.00732676		4239.17	-0.00393118
529.4	0.00499668		1059.39	0.00042017		1589.39	0.00724172		2119.38	-0.00779325		2649.38	-0.00409998		3179.37	-0.00421401		3709.37	0.00806431		4239.37	-0.00426082
529.6	0.00505799		1059.59	0.00057321		1589.59	0.00635544		2119.58	-0.007075		2649.58	-0.00384503		3179.57	-0.00438015		3709.57	0.00794945		4239.57	-0.00519575
529.8	0.00438879		1059.79	0.00075623		1589.79	0.00519596		2119.78	-0.00635491		2649.78	-0.00297002		3179.77	-0.00468491		3709.77	0.00822275		4239.77	-0.00585514
530	0.0029689		1059.99	0.00066608		1589.99	0.00477817		2119.98	-0.00672501		2649.98	-0.00324074		3179.97	-0.00564935		3709.97	0.00785484		4239.97	-0.00637363
530.2	0.00303364		1060.19	0.00159904		1590.19	0.0042276		2120.18	-0.00658876		2650.18	-0.00226802		3180.17	-0.00496196		3710.17	0.00813493		4240.17	-0.00634406
530.4	0.00203989		1060.39	0.00272528		1590.39	0.00302363		2120.38	-0.00622613		2650.38	-0.0022331		3180.37	-0.00496455		3710.37	0.00835129		4240.37	-0.00631454
530.6	0.00175022		1060.59	0.00328337		1590.59	0.00280007		2120.58	-0.0060248		2650.58	-0.00117943		3180.57	-0.0057473		3710.57	0.00813632		4240.57	-0.00615228
530.8	0.00072319		1060.79	0.00247676		1590.79	0.0022053		2120.78	-0.00675696		2650.78	-0.0008281		3180.77	-0.00560783		3710.77	0.00800122		4240.77	-0.00605467
531	0.0009003		1060.99	0.00225289		1590.99	0.00308347		2120.98	-0.00653481		2650.98	-0.00007325		3180.97	-0.00529351		3710.97	0.00858228		4240.97	-0.00686726
531.2	0.00113883		1061.19	0.00275851		1591.19	0.00365918		2121.18	-0.00688079		2651.18	-0.0006692		3181.17	-0.00496948		3711.17	0.0078004		4241.17	-0.00681652
531.4	0.00129667		1061.39	0.00190827		1591.39	0.0042304		2121.38	-0.00619587		2651.38	-0.0015381		3181.37	-0.00409084		3711.37	0.00749033		4241.37	-0.00681635
531.6	0.00101066		1061.59	0.00159084		1591.59	0.00349596		2121.58	-0.00562452		2651.58	-0.0021793		3181.57	-0.00337654		3711.57	0.00773471		4241.57	-0.00701377
531.8	0.00145076		1061.79	0.00143038		1591.79	0.00363189		2121.78	-0.00591239		2651.78	-0.00189678		3181.77	-0.00381556		3711.77	0.00789965		4241.77	-0.00686766
532	0.0017502		1061.99	0.0015385		1591.99	0.00429659		2121.98	-0.00610309		2651.98	-0.00162146		3181.97	-0.00347372		3711.97	0.0068016		4241.97	-0.0069789
532.2	0.00155079		1062.19	0.00091652		1592.19	0.00436026		2122.18	-0.00652881		2652.18	-0.00153695		3182.17	-0.00366158		3712.17	0.00596894		4242.17	-0.00622996
532.4	0.00124948		1062.39	0.0007742		1592.39	0.0039814		2122.38	-0.00689913		2652.38	-0.00261014		3182.37	-0.00320273		3712.37	0.00564709		4242.37	-0.0063309
532.6	0.00140228		1062.59	0.00051022		1592.59	0.00455389		2122.58	-0.00605661		2652.58	-0.00371055		3182.57	-0.00324078		3712.57	0.00598635		4242.57	-0.00518855
532.8	0.00252932		1062.79	-0.00018921		1592.79	0.00443279		2122.78	-0.00594013		2652.78	-0.00385704		3182.77	-0.00312909		3712.77	0.00584837		4242.77	-0.0043082
533	0.00222726		1062.99	-0.0009333		1592.99	0.00533917		2122.98	-0.00570323		2652.98	-0.00396396		3182.97	-0.00331887		3712.97	0.00604069		4242.97	-0.00323223
533.2	0.00222315		1063.19	-0.00188793		1593.19	0.00502545		2123.18	-0.00575855		2653.18	-0.004599		3183.17	-0.00352571		3713.17	0.00609216		4243.17	-0.00334428
533.4	0.00247996		1063.39	-0.00214626		1593.39	0.00532583		2123.38	-0.00618967		2653.38	-0.00456591		3183.37	-0.00341697		3713.37	0.00675607		4243.37	-0.00343637
533.6	0.00241695		1063.59	-0.00238509		1593.59	0.00497765		2123.58	-0.00670286		2653.58	-0.0048211		3183.57	-0.00321692		3713.57	0.00622345		4243.57	-0.00291125
533.8	0.00232248		1063.79	-0.00182241		1593.79	0.00557324		2123.78	-0.00744786		2653.78	-0.00440978		3183.77	-0.0041295		3713.77	0.00615289		4243.77	-0.00293253
534	0.00174386		1063.99	-0.00124479		1593.99	0.00569373		2123.98	-0.00779508		2653.98	-0.00489454		3183.97	-0.00433483		3713.97	0.00570394		4243.97	-0.00322117
534.2	0.0019577		1064.19	-0.000592		1594.19	0.00466232		2124.18	-0.00824952		2654.18	-0.0036309		3184.17	-0.00409071		3714.17	0.00535423		4244.17	-0.00281223
534.4	0.00097251		1064.39	0.00007292		1594.39	0.00440275		2124.38	-0.00809621		2654.38	-0.00499211		3184.37	-0.00500336		3714.37	0.00560345		4244.37	-0.00280637
534.6	0.00137805		1064.59	0.00047076		1594.59	0.00449741		2124.58	-0.00846742		2654.58	-0.00510925		3184.57	-0.00474371		3714.57	0.00567767		4244.57	-0.00284379
534.8	0.00124121		1064.79	-0.00022235		1594.79	0.00515691		2124.78	-0.00865276		2654.78	-0.00526178		3184.77	-0.00475129		3714.77	0.00641182		4244.77	-0.00284696
535	0.00249617		1064.99	0.00051931		1594.99	0.00573385		2124.98	-0.00820108		2654.98	-0.00502482		3184.97	-0.00510458		3714.97	0.00661053		4244.97	-0.00330219
535.2	0.00265346		1065.19	0.00054321		1595.19	0.00580549		2125.18	-0.007838		2655.18	-0.0053278		3185.17	-0.00528767		3715.17	0.00612523		4245.17	-0.0035889
535.4	0.0031294		1065.39	0.00020336		1595.39	0.00572174		2125.38	-0.00723792		2655.38	-0.00596077		3185.37	-0.00504203		3715.37	0.00603148		4245.37	-0.00388917
535.6	0.00292598		1065.59	0.00048619		1595.59	0.00509714		2125.58	-0.00776282		2655.58	-0.00560224		3185.57	-0.00493586		3715.57	0.00620239		4245.57	-0.00467767
535.8	0.00282812		1065.79	0.00004125		1595.79	0.0049908		2125.78	-0.00797318		2655.78	-0.00537195		3185.77	-0.00500634		3715.77	0.00665263		4245.77	-0.00413387
536	0.0028681		1065.99	0.00010745		1595.99	0.00506529		2125.98	-0.00706696		2655.98	-0.00564744		3185.97	-0.00536268		3715.97	0.0063076		4245.97	-0.00511344
536.2	0.00340396		1066.19	-0.00080639		1596.19	0.0052743		2126.18	-0.00699498		2656.18	-0.00606203		3186.17	-0.00570847		3716.17	0.00664228		4246.17	-0.00428677
536.4	0.00353702		1066.39	-0.00120855		1596.39	0.00496912		2126.38	-0.0058619		2656.38	-0.0064955		3186.37	-0.00551068		3716.37	0.00677681		4246.37	-0.00463444
536.6	0.00439818		1066.59	-0.0020745		1596.59	0.00492084		2126.58	-0.00522863		2656.58	-0.00560934		3186.57	-0.00525434		3716.57	0.00715072		4246.57	-0.00356208
536.8	0.00520409		1066.79	-0.00253482		1596.79	0.00420694		2126.78	-0.00552835		2656.78	-0.00485302		3186.77	-0.0057719		3716.77	0.00705582		4246.77	-0.00341833
537	0.00540008		1066.99	-0.00240656		1596.99	0.00426779		2126.98	-0.00485439		2656.98	-0.00457413		3186.97	-0.00666753		3716.97	0.00789458		4246.97	-0.00351935
537.2	0.00560293		1067.19	-0.00316075		1597.19	0.00374197		2127.18	-0.00549455		2657.18	-0.00393216		3187.17	-0.00628199		3717.17	0.00795585		4247.17	-0.00405011
537.4	0.00628291		1067.39	-0.00372819		1597.39	0.00413637		2127.38	-0.00548102		2657.38	-0.0042616		3187.37	-0.00590575		3717.37	0.00775428		4247.37	-0.00371941
537.6	0.00690281		1067.59	-0.00423247		1597.59	0.00458698		2127.58	-0.00562494		2657.58	-0.00433378		3187.57	-0.00566363		3717.57	0.00669075		4247.57	-0.00310009
537.8	0.00629917		1067.79	-0.00359754		1597.79	0.00403722		2127.78	-0.00601451		2657.78	-0.00454184		3187.77	-0.00603489		3717.77	0.00715835		4247.77	-0.0032214
538	0.00595064		1067.99	-0.00449533		1597.99	0.00352204		2127.98	-0.00558333		2657.98	-0.0042589		3187.97	-0.00597529		3717.97	0.00655386		4247.97	-0.0029528
538.2	0.00609641		1068.19	-0.00425598		1598.19	0.00391033		2128.18	-0.00600704		2658.18	-0.00412145		3188.17	-0.00632486		3718.17	0.00701492		4248.17	-0.00292287
538.4	0.00578173		1068.39	-0.00368496		1598.39	0.00497911		2128.38	-0.0053222		2658.38	-0.00505762		3188.37	-0.00623663		3718.37	0.00728408		4248.37	-0.00335989
538.6	0.00552439		1068.59	-0.00375089		1598.59	0.00475797		2128.58	-0.00567002		2658.58	-0.00424434		3188.57	-0.00532894		3718.57	0.00690704		4248.57	-0.0039543
538.8	0.00554001		1068.79	-0.00402711		1598.79	0.00501064		2128.78	-0.00507406		2658.78	-0.00374088		3188.77	-0.0052593		3718.77	0.00697764		4248.77	-0.00376087
539	0.00501349		1068.99	-0.0026775		1598.99	0.00544012		2128.98	-0.00548296		2658.98	-0.0037533		3188.97	-0.00488931		3718.97	0.00680123		4248.97	-0.00348038
539.2	0.00416373		1069.19	-0.00210995		1599.19	0.00627099		2129.18	-0.00615489		2659.18	-0.0042029		3189.17	-0.00456642		3719.17	0.0068749		4249.17	-0.00420862
539.4	0.00325512		1069.39	-0.00141957		1599.39	0.0064792		2129.38	-0.00652919		2659.38	-0.00403191		3189.37	-0.00376123		3719.37	0.00683319		4249.37	-0.00366889
539.6	0.00285044		1069.59	-0.00120681		1599.59	0.00594176		2129.58	-0.00699946		2659.58	-0.00373914		3189.57	-0.00391089		3719.57	0.00734062		4249.57	-0.00454221
539.8	0.00332998		1069.79	-0.00080401		1599.79	0.0058279		2129.78	-0.00642629		2659.78	-0.00372241		3189.77	-0.00378538		3719.77	0.00741636		4249.77	-0.00433941
540	0.00326896		1069.99	-0.00016826		1599.99	0.00640278		2129.98	-0.00702014		2659.98	-0.00363257		3189.97	-0.00379126		3719.97	0.00769528		4249.97	-0.0045125
540.2	0.00378218		1070.19	-0.0000043		1600.19	0.00632156		2130.18	-0.00655637		2660.18	-0.00381394		3190.17	-0.00390095		3720.17	0.00732756		4250.17	-0.00376029
540.4	0.00309648		1070.39	0.00039613		1600.39	0.00522552		2130.38	-0.00621682		2660.38	-0.00367762		3190.37	-0.0045865		3720.37	0.00796325		4250.37	-0.0036138
540.6	0.00295571		1070.59	0.00033123		1600.59	0.00531104		2130.58	-0.00733247		2660.58	-0.0027738		3190.57	-0.00493268		3720.57	0.00774876		4250.57	-0.00344307
540.8	0.00386458		1070.79	0.00087143		1600.79	0.00547589		2130.78	-0.00726924		2660.78	-0.00267525		3190.77	-0.00581224		3720.77	0.00782242		4250.77	-0.00400323
541	0.00366903		1070.99	0.00060546		1600.99	0.00486166		2130.98	-0.00755617		2660.98	-0.00200888		3190.97	-0.00546505		3720.97	0.00785099		4250.97	-0.00409966
541.2	0.00358798		1071.19	0.00041118		1601.19	0.00403816		2131.18	-0.0081775		2661.18	-0.00129917		3191.17	-0.00500059		3721.17	0.00715648		4251.17	-0.00349443
541.4	0.0031861		1071.39	-0.00029704		1601.39	0.00305976		2131.38	-0.00883823		2661.38	-0.00144051		3191.37	-0.00453063		3721.37	0.00674652		4251.37	-0.00309212
541.6	0.00233427		1071.59	-0.00042363		1601.59	0.00241101		2131.58	-0.00929242		2661.58	-0.00119813		3191.57	-0.00409083		3721.57	0.00740598		4251.57	-0.00298318
541.8	0.00132224		1071.79	-0.00040959		1601.79	0.00147998		2131.78	-0.00900753		2661.78	-0.00194821		3191.77	-0.00442594		3721.77	0.00784432		4251.77	-0.0032373
542	0.00130177		1071.99	-0.00109808		1601.99	0.00185686		2131.98	-0.00791318		2661.98	-0.00201107		3191.97	-0.00471089		3721.97	0.00737685		4251.97	-0.00324129
542.2	0.00159426		1072.19	-0.00005119		1602.19	0.00201176		2132.18	-0.00766311		2662.18	-0.00275629		3192.17	-0.00477772		3722.17	0.00750544		4252.17	-0.00295888
542.4	0.00200234		1072.39	-0.00002177		1602.39	0.00152716		2132.38	-0.00687531		2662.38	-0.00376756		3192.37	-0.00460236		3722.37	0.00672589		4252.37	-0.00303496
542.6	0.00171012		1072.59	0.00022861		1602.59	0.00091199		2132.58	-0.00724509		2662.58	-0.00349622		3192.57	-0.00484662		3722.57	0.00560739		4252.57	-0.00227147
542.8	0.00174389		1072.79	0.00112863		1602.79	0.0009446		2132.78	-0.00652731		2662.78	-0.00431697		3192.77	-0.00520289		3722.77	0.00542126		4252.77	-0.00143035
543	0.00093319		1072.99	0.00171717		1602.99	0.0023041		2132.98	-0.0066693		2662.98	-0.00445086		3192.97	-0.00466034		3722.97	0.00512335		4252.97	-0.00091572
543.2	0.0008546		1073.19	0.00146076		1603.19	0.00287662		2133.18	-0.00735964		2663.18	-0.00480255		3193.17	-0.00426812		3723.17	0.00553476		4253.17	-0.00068176
543.4	0.00103401		1073.39	0.0005774		1603.39	0.00251033		2133.38	-0.00645278		2663.38	-0.00423327		3193.37	-0.00374876		3723.37	0.00616261		4253.37	-0.000938
543.6	0.00192617		1073.59	0.00043879		1603.59	0.00281469		2133.58	-0.00598618		2663.58	-0.00401196		3193.57	-0.00386162		3723.57	0.00705873		4253.57	-0.00089466
543.8	0.00314512		1073.79	0.0002039		1603.79	0.00418795		2133.78	-0.00594726		2663.78	-0.00387509		3193.77	-0.00381733		3723.77	0.00677659		4253.77	-0.00061709
544	0.00325654		1073.99	-0.00079729		1603.99	0.00552431		2133.98	-0.00638356		2663.98	-0.00409299		3193.97	-0.00391711		3723.97	0.00727075		4253.97	-0.00012778
544.2	0.00432362		1074.19	-0.00101996		1604.19	0.00637278		2134.18	-0.00609092		2664.18	-0.00487225		3194.17	-0.00539285		3724.17	0.00698351		4254.17	-0.0000226
544.4	0.00438943		1074.39	-0.0018634		1604.39	0.00653296		2134.38	-0.00620374		2664.38	-0.00472021		3194.37	-0.00578809		3724.37	0.00834904		4254.37	-0.00050845
544.6	0.0049106		1074.59	-0.00263693		1604.59	0.00706208		2134.58	-0.00670614		2664.58	-0.00446994		3194.57	-0.0058607		3724.57	0.00811502		4254.57	-0.00095757
544.8	0.00597354		1074.79	-0.00245021		1604.79	0.00695956		2134.78	-0.00613628		2664.78	-0.00392573		3194.77	-0.00566727		3724.77	0.00865804		4254.77	-0.00119719
545	0.00544072		1074.99	-0.00273		1604.99	0.00607791		2134.98	-0.00557179		2664.98	-0.00312521		3194.97	-0.00547802		3724.97	0.008235		4254.97	-0.00091646
545.2	0.00487564		1075.19	-0.0027087		1605.19	0.00594489		2135.18	-0.00529853		2665.18	-0.00278585		3195.17	-0.00574698		3725.17	0.00832877		4255.17	-0.0005829
545.4	0.003953		1075.39	-0.00332996		1605.39	0.00520623		2135.38	-0.00538793		2665.38	-0.00267267		3195.37	-0.00600553		3725.37	0.00867544		4255.37	-0.00183445
545.6	0.00385539		1075.59	-0.0031811		1605.59	0.00499989		2135.58	-0.0049188		2665.58	-0.00241696		3195.57	-0.0064304		3725.57	0.0085149		4255.57	-0.0026946
545.8	0.00386444		1075.79	-0.00291439		1605.79	0.00497576		2135.78	-0.00367857		2665.78	-0.00344459		3195.77	-0.00639496		3725.77	0.00794255		4255.77	-0.0032061
546	0.00426909		1075.99	-0.0025388		1605.99	0.0044978		2135.98	-0.00311021		2665.98	-0.0032963		3195.97	-0.00696862		3725.97	0.00706359		4255.97	-0.00324427
546.2	0.00369797		1076.19	-0.00226317		1606.19	0.00406123		2136.18	-0.00303727		2666.18	-0.00367882		3196.17	-0.00637376		3726.17	0.00619629		4256.17	-0.00380948
546.4	0.00404053		1076.39	-0.00220496		1606.39	0.00396101		2136.38	-0.00296305		2666.38	-0.00314325		3196.37	-0.00623769		3726.37	0.00543227		4256.37	-0.00537054
546.6	0.00304195		1076.59	-0.00195132		1606.59	0.00341156		2136.58	-0.00345875		2666.58	-0.00286734		3196.57	-0.00618005		3726.57	0.0043622		4256.57	-0.005852
546.8	0.0022071		1076.79	-0.00198418		1606.79	0.00305318		2136.78	-0.0029993		2666.78	-0.0030056		3196.77	-0.00602923		3726.77	0.00435328		4256.77	-0.00597081
547	0.00199849		1076.99	-0.00199563		1606.99	0.00311949		2136.98	-0.00432161		2666.98	-0.00280627		3196.97	-0.00528573		3726.97	0.00394276		4256.97	-0.00576112
547.2	0.0019682		1077.19	-0.00214916		1607.19	0.00270998		2137.18	-0.00543574		2667.18	-0.0027647		3197.17	-0.00543689		3727.17	0.00430563		4257.17	-0.0052642
547.4	0.00224878		1077.39	-0.00219477		1607.39	0.00255853		2137.38	-0.00480499		2667.38	-0.00165738		3197.37	-0.00507789		3727.37	0.00389225		4257.37	-0.00574524
547.6	0.00192861		1077.59	-0.00156637		1607.59	0.0029892		2137.58	-0.00573024		2667.58	-0.00167667		3197.57	-0.00537914		3727.57	0.00348456		4257.57	-0.00514453
547.8	0.00224738		1077.79	-0.00150558		1607.79	0.00302898		2137.78	-0.00694436		2667.78	-0.00161978		3197.77	-0.00564442		3727.77	0.00374661		4257.77	-0.00559742
548	0.00204522		1077.99	-0.00215604		1607.99	0.00265039		2137.98	-0.00802891		2667.98	-0.0024853		3197.97	-0.00512646		3727.97	0.00402804		4257.97	-0.00496864
548.2	0.00243991		1078.19	-0.00245505		1608.19	0.00183259		2138.18	-0.00817241		2668.18	-0.00332166		3198.17	-0.00577187		3728.17	0.00409078		4258.17	-0.00508454
548.4	0.00280499		1078.39	-0.00267195		1608.39	0.0013025		2138.38	-0.00900785		2668.38	-0.00322098		3198.37	-0.00548661		3728.37	0.00531581		4258.37	-0.0051268
548.6	0.00348617		1078.59	-0.00399125		1608.59	0.00213284		2138.58	-0.00943241		2668.58	-0.00274494		3198.57	-0.00553192		3728.57	0.00641443		4258.57	-0.00423837
548.8	0.00399911		1078.79	-0.00336333		1608.79	0.00335429		2138.78	-0.00852875		2668.78	-0.00179539		3198.77	-0.00594267		3728.77	0.00664829		4258.77	-0.00355507
549	0.00370722		1078.99	-0.00398847		1608.99	0.00405927		2138.98	-0.00797854		2668.98	-0.00174997		3198.97	-0.00546913		3728.97	0.00729455		4258.97	-0.00300879
549.2	0.00373005		1079.19	-0.00372571		1609.19	0.00502247		2139.18	-0.00776686		2669.18	-0.00151816		3199.17	-0.00622126		3729.17	0.007486		4259.17	-0.00269451
549.4	0.00420135		1079.39	-0.00410117		1609.39	0.00479009		2139.38	-0.00731675		2669.38	-0.00166474		3199.37	-0.00561367		3729.37	0.00794986		4259.37	-0.00395703
549.6	0.00464686		1079.59	-0.00500926		1609.59	0.00477742		2139.58	-0.00717242		2669.58	-0.00174078		3199.57	-0.00495902		3729.57	0.00820588		4259.57	-0.00363903
549.8	0.00488176		1079.79	-0.00611866		1609.79	0.00544499		2139.78	-0.0070395		2669.78	-0.00220565		3199.77	-0.00456129		3729.77	0.0081773		4259.77	-0.00340625
550	0.00410513		1079.99	-0.00626476		1609.99	0.00644736		2139.98	-0.00710432		2669.98	-0.00157424		3199.97	-0.00488733		3729.97	0.00703775		4259.97	-0.00369157
550.2	0.00426806		1080.19	-0.00621901		1610.19	0.0067513		2140.18	-0.00678267		2670.18	-0.00205959		3200.17	-0.00434634		3730.17	0.00730014		4260.17	-0.00431403
550.4	0.00513746		1080.39	-0.0061575		1610.39	0.00769482		2140.38	-0.00610676		2670.38	-0.00159901		3200.37	-0.00509065		3730.37	0.00747989		4260.37	-0.00488342
550.6	0.00463021		1080.59	-0.00620618		1610.59	0.0070992		2140.58	-0.00600315		2670.58	-0.00240615		3200.57	-0.00548161		3730.57	0.00763117		4260.57	-0.00397339
550.8	0.00425619		1080.79	-0.0057326		1610.79	0.00680023		2140.78	-0.005757		2670.78	-0.00206264		3200.77	-0.00610075		3730.77	0.0072907		4260.77	-0.00381719
551	0.00397999		1080.99	-0.0055571		1610.99	0.00688073		2140.98	-0.00620568		2670.98	-0.00211341		3200.97	-0.00605059		3730.97	0.00700046		4260.97	-0.00375529
551.2	0.00293914		1081.19	-0.00540121		1611.19	0.00727558		2141.18	-0.0050914		2671.18	-0.00172174		3201.17	-0.00623968		3731.17	0.00703591		4261.17	-0.00340685
551.4	0.00221949		1081.39	-0.00489665		1611.39	0.00640264		2141.38	-0.00453614		2671.38	-0.00146702		3201.37	-0.00671851		3731.37	0.00669065		4261.37	-0.0036642
551.6	0.00079227		1081.59	-0.00378692		1611.59	0.00518651		2141.58	-0.00483543		2671.58	-0.00224546		3201.57	-0.00641532		3731.57	0.00744073		4261.57	-0.00323795
551.8	0.00073698		1081.79	-0.00294942		1611.79	0.00447198		2141.78	-0.00519315		2671.78	-0.00251916		3201.77	-0.00600233		3731.77	0.00822935		4261.77	-0.00358092
552	0.00059187		1081.99	-0.0026271		1611.99	0.00374757		2141.98	-0.00581007		2671.98	-0.00317557		3201.97	-0.00622825		3731.97	0.00742328		4261.97	-0.00366905
552.2	0.00134261		1082.19	-0.00222597		1612.19	0.00307853		2142.18	-0.00619951		2672.18	-0.00271345		3202.17	-0.00675941		3732.17	0.00783297		4262.17	-0.00429815
552.4	0.00208073		1082.39	-0.00158862		1612.39	0.00291231		2142.38	-0.00798006		2672.38	-0.00242286		3202.37	-0.00616716		3732.37	0.00846947		4262.37	-0.00401415
552.6	0.00172999		1082.59	-0.0009728		1612.59	0.00230771		2142.58	-0.00801814		2672.58	-0.00193249		3202.57	-0.00620981		3732.57	0.009236		4262.57	-0.00324897
552.8	0.00118351		1082.79	0.00125692		1612.79	0.00198537		2142.78	-0.00761015		2672.78	-0.00139151		3202.77	-0.00609253		3732.77	0.0082406		4262.77	-0.00298636
553	0.00074855		1082.99	0.00146426		1612.99	0.00170363		2142.98	-0.00725823		2672.98	-0.00238482		3202.97	-0.00505861		3732.97	0.00915458		4262.97	-0.00327968
553.2	0.00108261		1083.19	0.00167714		1613.19	0.0011162		2143.18	-0.00737785		2673.18	-0.00297252		3203.17	-0.00475995		3733.17	0.00909961		4263.17	-0.00377191
553.4	0.00128727		1083.39	0.00151279		1613.39	0.00025492		2143.38	-0.0091684		2673.38	-0.00376629		3203.37	-0.00328008		3733.37	0.00892607		4263.37	-0.00408457
553.6	0.00195456		1083.59	0.00023857		1613.59	0.00067414		2143.58	-0.00931048		2673.58	-0.00373936		3203.57	-0.00308006		3733.57	0.0083968		4263.57	-0.00408928
553.8	0.00218672		1083.79	0.00047622		1613.79	0.00121686		2143.78	-0.00963263		2673.78	-0.00429312		3203.77	-0.00326075		3733.77	0.00725397		4263.77	-0.00427444
554	0.00145112		1083.99	0.00059328		1613.99	0.00216369		2143.98	-0.00863795		2673.98	-0.00485199		3203.97	-0.00325445		3733.97	0.00619412		4263.97	-0.00480713
554.2	0.00235402		1084.19	0.0005411		1614.19	0.00262359		2144.18	-0.00830875		2674.18	-0.00483233		3204.17	-0.00346209		3734.17	0.006824		4264.17	-0.00470705
554.4	0.00247445		1084.39	0.00009472		1614.39	0.00364027		2144.38	-0.00742758		2674.38	-0.00451724		3204.37	-0.00302761		3734.37	0.00729574		4264.37	-0.00565473
554.6	0.00175874		1084.59	-0.00029919		1614.59	0.00324337		2144.58	-0.00699501		2674.58	-0.00538647		3204.57	-0.00303367		3734.57	0.00684385		4264.57	-0.00482369
554.8	0.00147866		1084.79	-0.00065975		1614.79	0.00380342		2144.78	-0.00751705		2674.78	-0.00516632		3204.77	-0.00362496		3734.77	0.00687106		4264.77	-0.00505801
555	0.00105552		1084.99	-0.00160239		1614.99	0.00449792		2144.98	-0.00631469		2674.98	-0.00562567		3204.97	-0.00332756		3734.97	0.00678698		4264.97	-0.00474981
555.2	0.00060863		1085.19	-0.00232793		1615.19	0.00493185		2145.18	-0.00416772		2675.18	-0.00583602		3205.17	-0.00385142		3735.17	0.00737051		4265.17	-0.00395185
555.4	0.00112663		1085.39	-0.00196529		1615.39	0.00509727		2145.38	-0.00432456		2675.38	-0.00568944		3205.37	-0.00396342		3735.37	0.00809474		4265.37	-0.00388902
555.6	0.00136733		1085.59	-0.00097104		1615.59	0.00524104		2145.58	-0.00433693		2675.58	-0.00562236		3205.57	-0.00326352		3735.57	0.00831832		4265.57	-0.00428429
555.8	0.00229672		1085.79	-0.00136235		1615.79	0.00523903		2145.78	-0.00482779		2675.78	-0.00516308		3205.77	-0.0038976		3735.77	0.00760109		4265.77	-0.0049057
556	0.00279664		1085.99	-0.00094654		1615.99	0.00479172		2145.98	-0.00627145		2675.98	-0.00515067		3205.97	-0.00466521		3735.97	0.00709662		4265.97	-0.00547618
556.2	0.00332539		1086.19	-0.00136309		1616.19	0.00458017		2146.18	-0.00680327		2676.18	-0.00498413		3206.17	-0.00488731		3736.17	0.00717706		4266.17	-0.00576679
556.4	0.0031664		1086.39	-0.00116895		1616.39	0.00386045		2146.38	-0.00797064		2676.38	-0.00531011		3206.37	-0.00466711		3736.37	0.00720743		4266.37	-0.00500758
556.6	0.0023027		1086.59	-0.00060718		1616.59	0.00286462		2146.58	-0.00802404		2676.58	-0.00545829		3206.57	-0.0051079		3736.57	0.00671129		4266.57	-0.00480582
556.8	0.00211613		1086.79	-0.00023906		1616.79	0.00295068		2146.78	-0.00795475		2676.78	-0.00592357		3206.77	-0.00525624		3736.77	0.00681608		4266.77	-0.00536521
557	0.00234876		1086.99	-0.00028652		1616.99	0.00304198		2146.98	-0.00848518		2676.98	-0.00625388		3206.97	-0.0054483		3736.97	0.00754768		4266.97	-0.00639176
557.2	0.00290956		1087.19	0.0002888		1617.19	0.00276463		2147.18	-0.0094704		2677.18	-0.00653018		3207.17	-0.00557555		3737.17	0.00727756		4267.17	-0.00627911
557.4	0.00227944		1087.39	0.00046418		1617.39	0.00300731		2147.38	-0.01028179		2677.38	-0.00655594		3207.37	-0.00569221		3737.37	0.00680577		4267.37	-0.00589432
557.6	0.00190689		1087.59	0.00006202		1617.59	0.00352574		2147.58	-0.00897103		2677.58	-0.00676241		3207.57	-0.00556349		3737.57	0.00628823		4267.57	-0.00648917
557.8	0.00059964		1087.79	0.00023887		1617.79	0.00354193		2147.78	-0.00877209		2677.78	-0.00704572		3207.77	-0.00543024		3737.77	0.00626625		4267.77	-0.00632173
558	-0.00015332		1087.99	-0.00034982		1617.99	0.00407908		2147.98	-0.00822794		2677.98	-0.00670235		3207.97	-0.00516811		3737.97	0.00624046		4267.97	-0.00656685
558.2	-0.00018601		1088.19	-0.00059385		1618.19	0.00425066		2148.18	-0.00810977		2678.18	-0.00602997		3208.17	-0.00511179		3738.17	0.00658602		4268.17	-0.00654322
558.4	-0.00061361		1088.39	-0.00109706		1618.39	0.00417867		2148.38	-0.0075303		2678.38	-0.00604368		3208.37	-0.00459292		3738.37	0.00662949		4268.37	-0.00676831
558.6	-0.0010794		1088.59	-0.00200376		1618.59	0.00404513		2148.58	-0.00741552		2678.58	-0.0060619		3208.57	-0.00527198		3738.57	0.00630626		4268.57	-0.00608924
558.8	-0.00092664		1088.79	-0.00283839		1618.79	0.00414093		2148.78	-0.00719338		2678.78	-0.00557665		3208.77	-0.00520166		3738.77	0.00637163		4268.77	-0.00641259
559	-0.0008791		1088.99	-0.00382053		1618.99	0.00414136		2148.98	-0.00564487		2678.98	-0.00542254		3208.97	-0.00471802		3738.97	0.00601545		4268.97	-0.00655794
559.2	-0.00062854		1089.19	-0.00457521		1619.19	0.00398717		2149.18	-0.0049839		2679.18	-0.00487764		3209.17	-0.00494046		3739.17	0.00649866		4269.17	-0.00673168
559.4	0.00008106		1089.39	-0.00450178		1619.39	0.0040482		2149.38	-0.00569283		2679.38	-0.0038844		3209.37	-0.00465572		3739.37	0.00624693		4269.37	-0.0075678
559.6	0.00069764		1089.59	-0.00509437		1619.59	0.00357809		2149.58	-0.00576989		2679.58	-0.0034956		3209.57	-0.00497343		3739.57	0.00524132		4269.57	-0.00828713
559.8	0.00162803		1089.79	-0.00630846		1619.79	0.00306004		2149.78	-0.00601311		2679.78	-0.00336976		3209.77	-0.00534944		3739.77	0.00470312		4269.77	-0.00887626
