# Supplementary material for: Functional development of a V3/glycan-specific broadly neutralizing antibody isolated from a case of HIV superinfection
Source: eLife. 2021 Jul 15;10:e68110. doi: 10.7554/eLife.68110 (PMC8376252; doi:10.7554/eLife.68110)
Supplement: Figure 2—source data 3. [file elife-68110-fig2-data3.xlsx]

## Sheet: Sheet1
	Virus IC50 (µg/mL)
Antibody	QA013 765 dpi (clade A)											BG505.W6.C2 T332N (clade A)											SF162 (clade B)											QC406.F3 (clade C)
	2020-09-15	2019-11-25	2020-03-09	2019-10-14	2020-06-22	2020-06-02	2020-07-08	2020-07-16	2021-01-22	2021-01-25	Avg	2020-09-15	2019-10-09	2019-11-25	2020-03-18	2020-06-02	2020-06-22	2020-07-08	2020-07-16	2021-01-22	2021-01-25	Avg	2019-09-04	2020-09-15	2019-07-23	2019-10-14	2019-11-25	2020-06-02	2020-06-22	2019-10-09	2020-07-08	2020-07-16	Avg	2020-09-15	2019-07-23	2019-11-25	2019-10-09	2020-06-02	2020-06-22	2019-09-25	2020-07-08	2020-07-16	Avg
Naïve	>50									>50	50	>50									>50	50		>50	>50								50	>50	>50								50
Int6VHInt5VL	>50									>50	50	>50									>50	50		>50	>50								50	>50	>50								50
0VHmatVL	>50									>50	50	>50									>50	50		>50									50	>50	>50								50
Int6VHmatVL	>50									>50	50	>50									>50	50	>50	>50									50	>50	>50								50
matVH0VL		<1.5625	1.34	<1.5625	>5	2.85		7.12	7.44		3.83929		2.75	<1.5625	11.78	>20	>5		>20	20.75		13.38				>50	35.32	>20	>5	>50		>20	30.0533			<1.5625	<1.5625	2.34	>5			6.63	3.419
matVHInt5VL		<1.5625	<0.625		1.33		1.01	1.31	1.06		1.14958		<1.5625	<1.5625	2.45		>5	3.55	0.98	1.79		2.41357	6.4				14.42		>5	26.87	>10	>20	13.7817			<1.5625	<1.5625		0.4		0.34	0.19	0.811
		Excluded outliers that deviate >10-fold from the rest of the replicate IC50 values
