# Supplementary material for: Functional development of a V3/glycan-specific broadly neutralizing antibody isolated from a case of HIV superinfection
Source: eLife. 2021 Jul 15;10:e68110. doi: 10.7554/eLife.68110 (PMC8376252; doi:10.7554/eLife.68110)
Supplement: Figure 3—source data 1. [file elife-68110-fig3-data1.xlsx]

## Sheet: Sheet1
BG505.SOSIP.664+QA013.2 Fab variable domain
(EMDB-24195)	(PDB 7N65)
Data collection and processing
Magnification	105000x
Voltage (kV)	300keV
Electron exposure (e–/Å2)	43.9
Defocus range (μm)	1.8
Pixel size (Å)	1.35 Å
Symmetry imposed	C3
Initial particle images (no.)	1082742
Final particle images (no.)	113470
Map resolution (Å)	4.18 Å (0.143 FSC)
FSC threshold
Refinement
Model resolution Estimates (Å) (Phenix mtriage)- Masked/Unmasked
d99 (Map alone)
d_model	4.37/4.22
Overall Biso	4.20/4.20
	125.0/120.0
Map sharpening B factor (Å2)	-81.95
Model composition	21564
Protein residues	BMA:30; NAG:111: MAN:51
Ligands
R.m.s. deviations	0.011
Bond lengths (Å)	1.177
Bond angles (°)
Validation	3.18
MolProbity score	34.96
Clashscore	0.0429
Poor rotamers (%)
Ramachandran plot	84.33
Favored (%)	15.46
Allowed (%)	0.21
Disallowed (%)
