# Supplementary material for: Functional development of a V3/glycan-specific broadly neutralizing antibody isolated from a case of HIV superinfection
Source: eLife. 2021 Jul 15;10:e68110. doi: 10.7554/eLife.68110 (PMC8376252; doi:10.7554/eLife.68110)
Supplement: Figure 4—source data 3. [file elife-68110-fig4-data3.xlsx]

## Sheet: Sheet1
	Virus IC50 (µg/mL)
Antibody	QA013 765 dpi (clade A)														BG505.W6.C2 T332N (clade A)													SF162 (clade B)										QC406.F3 (clade C)
	2019-11-21	2019-11-25	2019-12-03	2020-06-17	2020-09-22	2020-09-01	2020-07-08	2021-01-22	2021-01-25	2021-02-01	2021-06-16	2021-06-21	2021-06-25	Avg	2020-10-13	2019-12-03	2019-11-21	2020-08-11	2019-11-25	2020-09-01	2020-06-17	2020-07-08	2020-10-08	2021-01-25	2021-06-16	2021-06-21	Avg	2019-12-03	2019-11-21	2020-06-17	2019-11-25	2020-07-08	2020-09-01	2021-01-25	2021-06-16	2021-06-21	Avg	2020-10-13	2019-12-03	2020-06-17	2019-11-21	2019-11-25	2020-09-01	2020-07-08	2020-10-08	2021-01-25	2021-02-01	2021-06-16	2021-06-21
CDRH1			>50					>25	>50					50		>50								>18			50	>50						>18			50		>50							>18
CDRH2			>50					>25	>50					50		>50								>50			50	>50						>50			50		>50							>50
CDRH3			>50					>25	>50	38.65				40.9125		>50								>50			50	>50						>50			50		>50							>50
CDRH1+2								>25	>50					50			>50							>50			50		>50					>50			#DIV/0!				>50					>50
CDRH2+3	21.04							5.53	9.68					12.0833			>50							>50			50		>50					>50			#DIV/0!				>50					55.2	>50
CDRH1+3	<1.5625	<1.5625						0.11	0.49					0.93125			<1.5625		<1.5625					0.13			1.085		28.59		23.46			20.54			24.1967				<1.5625	<1.5625				0.11
Mature ∆FWR				>10					>50					50							>10			>50			50			>10				>50			50			>10						>50
Mature ∆FWRH1											14.39	18.88	19.05	17.44											>50	>50	50								>50	>50	50											>50	31.66
Mature ∆CDRH1					0.8	>10	>10		29.79					16.5967	>50			>50		>10		>10	>50				50					>10	>10	>50			50	19.1					>10	>10	19.11
Mature ∆CDRH3					<0.0488	0.38	<0.3125		1.34					0.520325	10.63			1.4		4.58		4.15	10.63				6.278					>10	>10	>25			25	0.15					0.26	<0.3125	0.15
		Excluded outliers that deviate >10-fold from the rest of the replicate IC50 values
[truncated: 2 more columns]
