# Supplementary material for: Functional development of a V3/glycan-specific broadly neutralizing antibody isolated from a case of HIV superinfection
Source: eLife. 2021 Jul 15;10:e68110. doi: 10.7554/eLife.68110 (PMC8376252; doi:10.7554/eLife.68110)
Supplement: Figure 5—source data 3. [file elife-68110-fig5-data3.xlsx]

## Sheet: Sheet1
	Virus IC50 (µg/mL)
Antibody	QA013 765 dpi (clade A)											BG505.W6.C2 T332N (clade A)										SF162 (clade B)											QC406.F3 (clade C)
	2020-09-29	2020-10-21	2020-12-15	2021-01-22							Average	2020-09-29	2020-10-21	2020-12-15	2020-08-28	2021-01-22					Average	2020-10-21	2020-12-15	2020-08-28	2021-01-25							Average	2020-09-29	2020-10-21	2020-12-15	2020-08-28				Average
QA013.2 mature	0.132748	0.157	0.246365	0.21							0.186528	<0.048828125	0.541337	0.420316	0.07	0.21					0.343884	0.588009	0.322812	1.32								0.743607	<0.048828125	<0.0488	0.100617	<0.048828125				0.0617544
E23A		<0.0488	0.695919	0.6							0.64796		0.106121	1.74313	0.12	1.16					0.656416	0.368498	1.58336	2.66	1.53							1.53547		<0.0488	0.196383	<0.048828125				0.0979943
I24A	0.550139	0.117	0.982321								0.54982	0.952476	0.793273	3.54825							1.76466	>50	>50		9.3							36.4333	<0.048828125	<0.0488	0.399664					0.165755
I25S	0.346852	<0.0488	0.534112								0.309921	0.366059	0.14174	2.05192							0.853239	13.7274	33.5204		7.89							18.3793	<0.048828125	<0.0488	0.246728					0.114776
E26G	12.0554	10.31	>10								10.7885	>50	>50	>10							50	>50	>50		>50							50	10.0975	>50	>10					23.3658
L27F	0.167051	<0.0488	0.507597								0.241149	0.103509	<0.0488	0.614728							0.255679	0.0825677	0.671389		0.38							0.377986	<0.048828125	<0.0488	0.190537					0.0960456
G28T	0.922987	0.232362	2.44								1.19845	3.16567	2.48408	6.8	1.05						3.37494	>50	>50	>50	>25							50	0.111939	0.197113	0.86	<0.048828125				0.119284
	2020-07-15	2020-09-15	2020-09-21	2020-09-29	2020-10-21	2020-12-08	2020-12-15	2020-08-28	2020-09-09	2021-01-22	Average	2020-09-15	2020-09-21	2020-09-29	2020-12-08	2020-08-28	2020-12-15	2020-09-09	2021-01-22	2021-02-01	Average	2020-07-15	2020-09-15	2020-09-21	2020-09-29	2020-08-28	2020-12-08	2020-12-15	2020-09-09	2021-01-25	2021-02-01	Average	2020-07-15	2020-09-29	2020-08-28	2020-12-08	2020-12-15	2020-09-09	2021-01-22	Average
QA013.2 mature	0.478637	0.0665736	<0.0488	0.0919272	0.16	0.300228	0.27	<0.0488	0.13	0.21	0.193271	0.0800193	<0.0488	0.0960062	0.375072	0.15	0.56	0.16	0.34	0.44	0.211237	1.10591	0.161551	<0.0488			0.23796	0.22	0.32		1.47	0.585904	<0.15625	<0.048828125	<0.048828125	0.32	0.13	<0.0195		0.125442
L78S				0.183234		0.797199				0.47	0.490216			0.190544	1.62984				0.86		0.910191						3.83852			2.09	2.91	2.94617		<0.048828125		0.162521			0.08	0.097107
F80Y	0.401159			0.0861758		0.450451					0.312595			0.102673	0.770882					0.18	0.351185	<0.625					0.435074				0.72	0.593358	<0.15625	<0.048828125		0.134776				0.113275
L103R	0.22956	0.181473				0.186848		<0.0488			0.16167	0.426862			0.558822	<0.0488			0.3		0.428561	<0.625	0.205389				0.333095			0.58		0.435871	<0.15625		<0.048828125	0.075505				0.0935183
V104L	0.247862	0.070028				0.322688		<0.0488			0.172344	0.112961			1.46686	<0.0488			0.37		0.177254		0.338276				0.527682			0.61		0.491986	<0.15625		<0.048828125	0.0830657				0.0960386
D106V			<0.0488	0.240897	0.08	0.33	0.82				0.174924		7.71	15.8573	17.12		>10		>25		15.1375			>50			>50	>50				50		<0.048828125		<0.0488	0.2			0.0992
R108T	0.539243	0.0651951				0.324534		0.08	0.36		0.273794	0.105064			1.80976	0.09		0.85	1.82		1.49325	2.38772	0.0992315				0.451435		0.41	0.66		0.507145	<0.15625		<0.048828125	0.0802412		<0.0195		0.0761978
I109Q		0.0423645				0.145834		0.05	0.14	0.12	0.0996398	0.0981841			0.380956	<0.0488		0.23	0.28		0.207588		0.0888951				1.14887		0.68	0.65		0.472965			<0.048828125	0.0276435		<0.0195	0.04	0.0339859
P120Q	0.23347	0.10426				0.24526		0.1			0.170747	0.181894			0.69745	<0.0488			0.9		0.593115	<0.625	0.805484				0.358026			0.22		0.502128	<0.15625		<0.048828125	0.0335303				0.0795268
		Excluded outliers that deviate >10-fold from the rest of the replicate IC50 values
