# Supplementary material for: Functional development of a V3/glycan-specific broadly neutralizing antibody isolated from a case of HIV superinfection
Source: eLife. 2021 Jul 15;10:e68110. doi: 10.7554/eLife.68110 (PMC8376252; doi:10.7554/eLife.68110)
Supplement: Figure 6—source data 3. [file elife-68110-fig6-data3.xlsx]

## Sheet: Sheet1
	Virus IC50 (µg/mL)
Antibody	QA013 765 dpi (clade A)										BG505.W6.C2 T332N (clade A)									SF162 (clade B)							QC406.F3 (clade C)
	2020-09-09	2020-09-01	2020-09-22	2020-06-22	2020-05-28	2021-01-05	2020-07-16	2020-11-10	2021-01-22	Average	2020-09-09	2020-09-01	2020-05-28	2021-01-05	2020-03-18	2020-07-16	2020-11-10	2021-01-22	Average	2020-09-09	2020-09-01	2021-01-05	2020-05-28	2020-06-22	2020-11-10	Average	2020-09-09	2020-09-01	2021-01-05	2020-05-28	2020-06-22	2020-11-10	2021-01-25	Average
Gmat/∆CDRL2	<1.5625	1.15	0.7	1.1	<1.5625	0.13	1.15			1.05071	1.98	3.24	1.98	0.11		4.17			2.8425	>50	>10	12.18	>50	>5		25.436	<1.5625	0.46	<0.0244	<1.5625	0.34			0.98125
Gmat/∆FWR2-CDRL2	0.21					0.29			0.49	0.33	0.36			0.27			0.12	0.59	0.335	1.61		9.66			5.89	5.72	<0.0195		<0.0244			<0.0488	0.1	0.048175
Gmat/∆CDRL2-FWR3	0.18					0.19		0.08	0.52	0.2425	0.43			0.3			0.12	0.42	0.3175	1.88		7.3			2.64	3.94	0.05		<0.0244				0.06	0.0448
Gmat/∆CDRL3	<1.5625	0.69	<0.0488	0.81	<1.5625	0.07				0.939	<1.5625	1.63	<1.5625	0.06					1.585	>50	9.3	7.28	>50	>5		24.316	<1.5625	0.17	<0.0244	<1.5625	<0.015625			0.0700083
		Excluded outliers that deviate >10-fold from the rest of the replicate IC50 values
