# Supplementary material for: Functional development of a V3/glycan-specific broadly neutralizing antibody isolated from a case of HIV superinfection
Source: eLife. 2021 Jul 15;10:e68110. doi: 10.7554/eLife.68110 (PMC8376252; doi:10.7554/eLife.68110)
Supplement: Figure 7—source data 1. [file elife-68110-fig7-data1.xlsx]

## Sheet: Sheet1
			Replicate 1	Replicate 2	Replicate 3	Replicate 4	Replicate 5
		Avg. Fold ∆IC50 Relative to WT	Fold ∆IC50	Fold ∆IC50	Fold ∆IC50	Fold ∆IC50	Fold ∆IC50
		QA013.2	QA013.2 bnAb	QA013.2 bnAb	QA013.2 bnAb	QA013.2 bnAb	QA013.2 bnAb
V1	D141E	2.7	2.3	1.6	3.38	3.65	-
	R151K	2.7	3.1	3.2	1.88	-	-
V3	I323G	2.9	2.1	-	5.22	0.78	3.4
	D325E	32	>32	>1000	>2500		>50
	D325N	0.6	0.6	-	1	0.27	-
	D325S	0.8	0.7	-	1	0.37	1.1
	I326Y	1.9	1.9	-	3.08	0.69	-
	R327Y	32	>32	>1000	>2500		-
	H330R	32	>32	>1000	>2500		>50
Near N301	G441P	8.4	8.8	-	-	6.87	9.4
	QA013.2 mature bnAb IC50 (µg/mL)
	WT	D141E	R151K	I323G	D325E	D325N	D325S	I326Y	R327Y	H330R	G441P
2019	0.38	0.87	1.18	0.8	>12.5	0.23	0.27	0.72	>12.5	>12.5	3.34
2020-08-11	0.05	0.08	0.16	-	>50	-	-	-	>50	>50	-
2020-09-18	0.01	0.08	0.05	0.13	>25	0.02	0.02	0.08	>25	>25	-
2021-01-08	0.3	1.11	-	0.24	-	0.08	-	0.21	>12.5	-	2.09
2021-01-20	0.25	-	-	0.84	>12.5	-	0.28	-	-	>12.5	2.33
2021-02-03	0.29	-	-	-	-	-	0.61	-	-	32.94	-
