# Supplementary material for: Functional development of a V3/glycan-specific broadly neutralizing antibody isolated from a case of HIV superinfection
Source: eLife. 2021 Jul 15;10:e68110. doi: 10.7554/eLife.68110 (PMC8376252; doi:10.7554/eLife.68110)
Supplement: Figure 8—source data 1. [file elife-68110-fig8-data1.xlsx]

## Sheet: Sheet1
	Virus IC50 (µg/mL)
Virus	Rep 1 (5/18/21)	Rep 2 (5/25/21)	Rep 3 (6/2/21)	Rep 4 (6/7/21)	Rep 5 (6/16/21)	Average
BG505.W6.C2 T332N	-	-	-	-	-	-
BG505.W6.C2 T332N N301K	-	-	>50	>50	>50	>50
QA013.765M.C1	-	-	-	-	-	-
BG505.W6.C1	-	-	-	-	-	-
QB726.70M.B3	>50	>50	-	-	-	>50
Q259.W6	>50	>50	-	-	-	>50
QH343.21M.A10	0.805238	1.07	-	-	-	0.937619
QA255.21P.A15	2.8422	3.26	-	-	-	3.0511
BI206.W6RT.A1	0.0610637	<0.0488	-	-	-	0.0549319
BF520.W14.B3	>50	>50	-	-	-	>50
BL274.W6.A3	0.30186	0.35	-	-	-	0.32593
ML274.W0.D1	0.407626	0.25	-	-	-	0.328813
MS208.W0.B.A3	-	>50	>50	-	-	>50
MI206.W0.A1	-	0.61	0.49	-	-	0.55
MJ613.W1.A2	-	3.32	1.39	-	-	2.355
MG505.W0.A2	>50	>50	-	-	-	>50
MF535.W0.F1	-	>50	>50	-	-	>50
ML035.W0.A1	-	>50	>50	-	-	>50
BF535.W6.A1	>50	>50	-	-	-	>50
BL035.W6.B1	>50	>50	-	-	-	>50
SF162	-	-	-	-	-	-
QC406.F3	-	-	-	-	-	-
MK184.W0.D1	-	0.18	<0.0488	-	-	0.1144
QA013.70I.H1	-	-	-	-	-	-
QA465.59M.A1	>50	>50	-	-	-	>50
QB857.110I.B3	>50	>50	-	-	-	>50
