# Supplementary material for: Functional development of a V3/glycan-specific broadly neutralizing antibody isolated from a case of HIV superinfection
Source: eLife. 2021 Jul 15;10:e68110. doi: 10.7554/eLife.68110 (PMC8376252; doi:10.7554/eLife.68110)
Supplement: Supplementary file 2. — Sequence file includes sampled NGS sequences with the highest nucleotide identity to all QA013.2 inferred lineage members and mature sequences. [file elife-68110-supp2.fasta]

>QA013-l-dm379-m8-MIG34788-1 99.7% identity to
>VL_naive
NNNNNNNNNNNNNNNNNNCAGTCTGTGCTGACGCAGCCGCCCTCAGTGTC
TGGGGCCCCAGGGCAGAGGGTCACCATCTCCTGCACTGGGAGCAGCTCCA
ACATCGGGGCAGGTTATGATGTACACTGGTACCAGCAGCTTCCAGGAACA
GCCCCCAAACTCCTCATCTATGGTAACAGCAATCGGCCCTCAGGGGTCCC
TGACCGATTCTCTGGCTCCAAGTCTGGCACCTCAGCCTCCCTGGCCATCA
CTGGGCTCCAGGCTGAGGATGAGGCTGATTATTACTGCCAGTCCTATGAC
AGCAGCCTGAGTGGTTTGGTATTCGGCGGAGGGACCAAGCTGACCGTCCT
AG

>QA013-l-d765-m8-MIG544-345 99.7% identity to
>VL_naive
NNNNNNNNNNNNNNNNNNCAGTCTGTGCTGACGCAGCCGCCCTCAGTGTC
TGGGGCCCCAGGGCAGAGGGTCACCATCTCCTGCACTGGGAGCAGCTCCA
ACATCGGGGCAGGTTATGATGTACACTGGTACCAGCAGCTTCCAGGAACA
GCCCCCAAACTCCTCATCTATGGTAACAGCAATCGGCCCTCAGGGGTCCC
TGACCGATTCTCTGGCTCCAAGTCTGGCACCTCAGCCTCCCTGGCCATCA
CTGGGCTCCAGGCTGAGGATGAGGCTGATTATTACTGCCAGTCCTATGAC
AGCAGCCTGAGTGGTTCGGTGTTCGGCGGAGGGACCAAGCTGACCGTCCT
AG

>QA013-l-d765-m8-MIG544-345 99.7% identity to
>VL_int_1
NNNNNNNNNNNNNNNNNNCAGTCTGTGCTGACGCAGCCGCCCTCAGTGTC
TGGGGCCCCAGGGCAGAGGGTCACCATCTCCTGCACTGGGAGCAGCTCCA
ACATCGGGGCAGGTTATGATGTACACTGGTACCAGCAGCTTCCAGGAACA
GCCCCCAAACTCCTCATCTATGGTAACAGCAATCGGCCCTCAGGGGTCCC
TGACCGATTCTCTGGCTCCAAGTCTGGCACCTCAGCCTCCCTGGCCATCA
CTGGGCTCCAGGCTGAGGATGAGGCTGATTATTACTGCCAGTCCTATGAC
AGCAGCCTGAGTGGTTCGGTGTTCGGCGGAGGGACCAAGCTGACCGTCCT
AG

>QA013-l-d765-m8-MIG544-345 99.1% identity to
>VL_int_2
NNNNNNNNNNNNNNNNNNCAGTCTGTGCTGACGCAGCCGCCCTCAGTGTC
TGGGGCCCCAGGGCAGAGGGTCACCATCTCCTGCACTGGGAGCAGCTCCA
ACATCGGGGCAGGTTATGATGTACACTGGTACCAGCAGCTTCCAGGAACA
GCCCCCAAACTCCTCATCTATGGTAACAGCAATCGGCCCTCAGGGGTCCC
TGACCGATTCTCTGGCTCCAAGTCTGGCACCTCAGCCTCCCTGGCCATCA
CTGGGCTCCAGGCTGAGGATGAGGCTGATTATTACTGCCAGTCCTATGAC
AGCAGCCTGAGTGGTTCGGTGTTCGGCGGAGGGACCAAGCTGACCGTCCT
AG

>QA013-l-d765-m8-MIG24508-4 97.9% identity to
>VL_int_3a
NNNNNNNNNNNNNNNNNNCAGTCTGTGCTGACGCAGCCGCCCTCAGTGTC
TGGGGCCCCAGGGCAGAGGGTCACCATCTCCTGCACTGGGGGCAGCTCCA
ACATCGGGGCAGGTTATGATGTTCACTGGTATCAGCAGCTTCCAGGAACA
ACCCCCAAACTCTTCATCTATGGTAACAACAATCGACCCTCAGGGGTCCC
TGCCCGATTCTCTGGCTCCAAGTCTGCCACCTCAGCCTCCCTGGCCATCA
CTGGGCTCCAGGCTGAGGATGAGGCTGATTATTACTGCCAGTCCTATGAC
ATAACCCTGATTGGTTCGGTGTTCGGCGGAGGGACCAAGGTGACCGTCCT
AG

>QA013-l-d765-m8-MIG544-345 97.9% identity to
>VL_int_3a
NNNNNNNNNNNNNNNNNNCAGTCTGTGCTGACGCAGCCGCCCTCAGTGTC
TGGGGCCCCAGGGCAGAGGGTCACCATCTCCTGCACTGGGAGCAGCTCCA
ACATCGGGGCAGGTTATGATGTACACTGGTACCAGCAGCTTCCAGGAACA
GCCCCCAAACTCCTCATCTATGGTAACAGCAATCGGCCCTCAGGGGTCCC
TGACCGATTCTCTGGCTCCAAGTCTGGCACCTCAGCCTCCCTGGCCATCA
CTGGGCTCCAGGCTGAGGATGAGGCTGATTATTACTGCCAGTCCTATGAC
AGCAGCCTGAGTGGTTCGGTGTTCGGCGGAGGGACCAAGCTGACCGTCCT
AG

>QA013-l-d765-m8-MIG23889-4 98.2% identity to
>VL_int_3b
NNNNNNNNNNNNNNNNNNCAGTCTGTGCTGACGCAGCCGCCCTCAGTGTC
TGGGGCCCCAGGGCAGAGGGTCACCATCTCCTGCACTGGGAACAGGTCCA
ACATCGGGGCAGGTTATGATGTACACTGGTACAAGCAGGTTCCAGGAACA
GTCCCCAAACTCTTCATCTATGGTAGCAACAATCGACCCTCAGGGGTCCC
TGCCCGATTCTCTGGCTCCAAGTCTGGCACCTCAGCCTCCCTGGCCATCA
CTGGGCTCCAGGCTGAGGATGAGGCTGATTATTACTGCCAGTCCTATGAC
ACCACCCTGATTGGTTCGGTGTTCGGCGGAGGGACCAAGGTGACCGTCCT
AG

>QA013-l-d765-m8-MIG23889-4 99.4% identity to
>VL_int_4
NNNNNNNNNNNNNNNNNNCAGTCTGTGCTGACGCAGCCGCCCTCAGTGTC
TGGGGCCCCAGGGCAGAGGGTCACCATCTCCTGCACTGGGAACAGGTCCA
ACATCGGGGCAGGTTATGATGTACACTGGTACAAGCAGGTTCCAGGAACA
GTCCCCAAACTCTTCATCTATGGTAGCAACAATCGACCCTCAGGGGTCCC
TGCCCGATTCTCTGGCTCCAAGTCTGGCACCTCAGCCTCCCTGGCCATCA
CTGGGCTCCAGGCTGAGGATGAGGCTGATTATTACTGCCAGTCCTATGAC
ACCACCCTGATTGGTTCGGTGTTCGGCGGAGGGACCAAGGTGACCGTCCT
AG

>QA013-l-dm351-m8-MIG23903-4 98.5% identity to
>VL_int_5
NNNNNNNNNNNNNNNNNNCAGTCTGTGTTGACGCAGCCGCCCTCAGTGTC
TGGGGCCCCAGGGCAGAGGGTCACCATTTCCTGCACTGGGAGCAGGTCCA
ACATCGGGGCAGGTTATGATGTACACTGGTACAAGCAGGTTCCAGGAACA
GTCCCCAAACTCTTCATCTATGGTAACAACAATCGGCCCTCAGGAATCCC
TGACCGATTCTCTGGCTCCAAGTCTGGCACCTCAGCCTCCCTGGCCATCA
CTGGGCTCCAGGCTGAGGATGAGGCTGATTATTACTGCCAGTCCTATGAC
ATCACCCTCACTGGTTCGGTGTTCGGCGGAGGGACCAAGGTGACCGTCCT
AG

>QA013-l-dm379-m8-MIG3804-97 98.5% identity to
>VL_int_5
NNNNNNNNNNNNNNNNNNCAGTCTGTGTTGACGCAGCCGCCCTCAGTGTC
TGGGGCCCCAGGGCAGAGGGTCACCATCTCCTGCACTGGGAGCAGGTCCA
ACATCGGGGCAGGTTACGATGTACACTGGTACAAGCAGGTTCCAGGAACA
GTCCCCAAACTCTTCATCTATGGTAGCAACAATCGGCCCTCAGGGGTCCC
TGCCCGATTCTCTGGCTCCAAGTCTGGCACCTCAGCCTCCCTGGCCATCA
CTGGGCTCCAGGCTGAGGATGAGGCTGATTATTACTGCCAGTCGTATGAC
ACCACCCTCGTTGGTTCGGTGTTCGGCGGAGGGACCAAGGTGACCGTCCT
AG

>QA013-l-d385-m8-MIG23412-4 90.65% identity to
>QA013.2-igl
NNNNNNNNNNNNNNNNNNCAGTCTGTACTGACGCAGCCGCCCTCAGTGTC
TGGGGCCCCAGGGCAGAGGGTCATCATCTCCTGCACTGGGAGCAGCTCCA
ACATCGGGGCAGGGTATGATGTACACTGGTACCAGCAACTTCCAGGAACA
GTCCCCAAACTCCTCATCTATGGTAGTCGCAATCGGCCCTCAGGGGTCCC
TGCCCGATTCTCTGGCTCCAAGTCTGGCACCTCAGCCTCCCTGGCCATCA
CTGGGCTCCAGGCTGAGGATGAGGCTGATTATTACTGCCAGTCCTATGAC
ACCAGCCTGATTGCTTCGGTGTTCGGCGGGGGGACCAAGCTGGCCGTCCT
AG

>QA013-g-dm379-m8-MIG12871-1 93.47% identity to
>VH_naive
NNNNNNNNNGAGGTGCAACTGGTGGAGTCTGGGGGAGGCTTGGTCCAGCC
TGGGGGGTCCCTGAGACTCGCCTGTGTAGCCTCTGGATTCGACTTTAGAA
GCTCTTGGATAACGTGGGTCCGCCAGGCTCCAGGGAAAGGGCTGGAGTGG
GTGGCCGACATAAAGGAAGATGGTAGTGAGAAAAAGTATGTGGACTCTGT
GAGGGGCCGATTCACCATTTCCAGAGACAACGCCAAGAACTCAGTGTATC
TGCAAATGAACAGCCTGAGAGCCGAGGACACGGCCGTTTATCATTGTGCC
AAAGAATCATATCATCGGCTGTATGTGGATACACAACCTCGGGGGAACTG
GTTCGACCCCTGGGGCCAGGGAACCCTGGTCACCGTCTCCTCGG

>QA013-g-dm379-m8-MIG12871-1 93.73% identity to
>VH_int_1
NNNNNNNNNGAGGTGCAACTGGTGGAGTCTGGGGGAGGCTTGGTCCAGCC
TGGGGGGTCCCTGAGACTCGCCTGTGTAGCCTCTGGATTCGACTTTAGAA
GCTCTTGGATAACGTGGGTCCGCCAGGCTCCAGGGAAAGGGCTGGAGTGG
GTGGCCGACATAAAGGAAGATGGTAGTGAGAAAAAGTATGTGGACTCTGT
GAGGGGCCGATTCACCATTTCCAGAGACAACGCCAAGAACTCAGTGTATC
TGCAAATGAACAGCCTGAGAGCCGAGGACACGGCCGTTTATCATTGTGCC
AAAGAATCATATCATCGGCTGTATGTGGATACACAACCTCGGGGGAACTG
GTTCGACCCCTGGGGCCAGGGAACCCTGGTCACCGTCTCCTCGG

>QA013-g-dm379-m8-MIG12871-1 93.35% identity to
>VH_int_2a
NNNNNNNNNGAGGTGCAACTGGTGGAGTCTGGGGGAGGCTTGGTCCAGCC
TGGGGGGTCCCTGAGACTCGCCTGTGTAGCCTCTGGATTCGACTTTAGAA
GCTCTTGGATAACGTGGGTCCGCCAGGCTCCAGGGAAAGGGCTGGAGTGG
GTGGCCGACATAAAGGAAGATGGTAGTGAGAAAAAGTATGTGGACTCTGT
GAGGGGCCGATTCACCATTTCCAGAGACAACGCCAAGAACTCAGTGTATC
TGCAAATGAACAGCCTGAGAGCCGAGGACACGGCCGTTTATCATTGTGCC
AAAGAATCATATCATCGGCTGTATGTGGATACACAACCTCGGGGGAACTG
GTTCGACCCCTGGGGCCAGGGAACCCTGGTCACCGTCTCCTCGG

>QA013-g-dm379-m8-MIG12871-1 96.35% identity to
>VH_int_2b
NNNNNNNNNGAGGTGCAACTGGTGGAGTCTGGGGGAGGCTTGGTCCAGCC
TGGGGGGTCCCTGAGACTCGCCTGTGTAGCCTCTGGATTCGACTTTAGAA
GCTCTTGGATAACGTGGGTCCGCCAGGCTCCAGGGAAAGGGCTGGAGTGG
GTGGCCGACATAAAGGAAGATGGTAGTGAGAAAAAGTATGTGGACTCTGT
GAGGGGCCGATTCACCATTTCCAGAGACAACGCCAAGAACTCAGTGTATC
TGCAAATGAACAGCCTGAGAGCCGAGGACACGGCCGTTTATCATTGTGCC
AAAGAATCATATCATCGGCTGTATGTGGATACACAACCTCGGGGGAACTG
GTTCGACCCCTGGGGCCAGGGAACCCTGGTCACCGTCTCCTCGG

>QA013-g-dm379-m8-MIG12871-1 97.91 % identity to
>VH_int_3a
NNNNNNNNNGAGGTGCAACTGGTGGAGTCTGGGGGAGGCTTGGTCCAGCC
TGGGGGGTCCCTGAGACTCGCCTGTGTAGCCTCTGGATTCGACTTTAGAA
GCTCTTGGATAACGTGGGTCCGCCAGGCTCCAGGGAAAGGGCTGGAGTGG
GTGGCCGACATAAAGGAAGATGGTAGTGAGAAAAAGTATGTGGACTCTGT
GAGGGGCCGATTCACCATTTCCAGAGACAACGCCAAGAACTCAGTGTATC
TGCAAATGAACAGCCTGAGAGCCGAGGACACGGCCGTTTATCATTGTGCC
AAAGAATCATATCATCGGCTGTATGTGGATACACAACCTCGGGGGAACTG
GTTCGACCCCTGGGGCCAGGGAACCCTGGTCACCGTCTCCTCGG

>QA013-g-dm379-m8-MIG12871-1 97.65% identity to
>VH_int_3b
NNNNNNNNNGAGGTGCAACTGGTGGAGTCTGGGGGAGGCTTGGTCCAGCC
TGGGGGGTCCCTGAGACTCGCCTGTGTAGCCTCTGGATTCGACTTTAGAA
GCTCTTGGATAACGTGGGTCCGCCAGGCTCCAGGGAAAGGGCTGGAGTGG
GTGGCCGACATAAAGGAAGATGGTAGTGAGAAAAAGTATGTGGACTCTGT
GAGGGGCCGATTCACCATTTCCAGAGACAACGCCAAGAACTCAGTGTATC
TGCAAATGAACAGCCTGAGAGCCGAGGACACGGCCGTTTATCATTGTGCC
AAAGAATCATATCATCGGCTGTATGTGGATACACAACCTCGGGGGAACTG
GTTCGACCCCTGGGGCCAGGGAACCCTGGTCACCGTCTCCTCGG

>QA013-g-dm379-m8-MIG12871-1 99.22% identity to
>VH_int_4
NNNNNNNNNGAGGTGCAACTGGTGGAGTCTGGGGGAGGCTTGGTCCAGCC
TGGGGGGTCCCTGAGACTCGCCTGTGTAGCCTCTGGATTCGACTTTAGAA
GCTCTTGGATAACGTGGGTCCGCCAGGCTCCAGGGAAAGGGCTGGAGTGG
GTGGCCGACATAAAGGAAGATGGTAGTGAGAAAAAGTATGTGGACTCTGT
GAGGGGCCGATTCACCATTTCCAGAGACAACGCCAAGAACTCAGTGTATC
TGCAAATGAACAGCCTGAGAGCCGAGGACACGGCCGTTTATCATTGTGCC
AAAGAATCATATCATCGGCTGTATGTGGATACACAACCTCGGGGGAACTG
GTTCGACCCCTGGGGCCAGGGAACCCTGGTCACCGTCTCCTCGG

>QA013-g-dm379-m8-MIG12871-1 100% identity to
>VH_int_5
NNNNNNNNNGAGGTGCAACTGGTGGAGTCTGGGGGAGGCTTGGTCCAGCC
TGGGGGGTCCCTGAGACTCGCCTGTGTAGCCTCTGGATTCGACTTTAGAA
GCTCTTGGATAACGTGGGTCCGCCAGGCTCCAGGGAAAGGGCTGGAGTGG
GTGGCCGACATAAAGGAAGATGGTAGTGAGAAAAAGTATGTGGACTCTGT
GAGGGGCCGATTCACCATTTCCAGAGACAACGCCAAGAACTCAGTGTATC
TGCAAATGAACAGCCTGAGAGCCGAGGACACGGCCGTTTATCATTGTGCC
AAAGAATCATATCATCGGCTGTATGTGGATACACAACCTCGGGGGAACTG
GTTCGACCCCTGGGGCCAGGGAACCCTGGTCACCGTCTCCTCGG

>QA013-g-dm379-m8-MIG10581-1 100% identity to
>VH_int_6
NNNNNNNNNGAGGTGCAACTGGTGGAGTCTGGGGGAGGCTTGGTCCAGCC
TGGGGGGTCCCTGAGACTCGCCTGTGTAGCCTCTGGATTCGACTTTAGAA
GGTCTTGGATAACGTGGGTCCGCCAGGCTCCAGGGAAAGGGCTGGAGTGG
GTGGCCGACATAAAGGAAGATGGTAGTGAGAAAAAGTATGTGGACTCTGT
GAGGGGCCGATTCACCATTTCCAGAGACAACGCCAAGAACTCAGTGTATC
TGCAAATGAACAGCCTGAGAGCCGAGGACACGGCCGTTTATCATTGTGCC
AAAGAATCATATCATCGGCTGTATGTGGATACACAACCTCGGGGGAACTG
GTTCGACCCCTGGGGCCAGGGAACCCTGGTCACCGTCTCCTCGG

>QA013-g-dm379-m8-MIG8502-1 81.51% identity to
>QA013.2-igh
NNNNNNNNNNNNNNNNNNNNNNNNNNNNNNNNNNNNNNNNNNNNNNNNNN
NNNNNNNTCTCTTAGACTCTCCTGTGCAGCCTCTGGATCCACCTTTAGTA
GTTCTTGGATGACTTGGGTCCGCCAGGCTCCAGGGAAAGGGCTGGAGTGG
GTGGCCGACATAAAGGAAGATGGTAGTGAGACAAAATATATGCACTCTGT
AAAGGGCCGCTTTACCATCTCCAGAGACAACGACAAGAAGTCTCTGTATC
TGCAAATGAACAGCCTGAGAGCCCAGGACACGGCCATTTATTACTGTATC
AAAGAATCATCTCATAAGATATGGCTGGACACACCTCCTCGGGGAAACTG
GTTCGACCCCTGGGGCCAGGGAACCCTGGTCACCGTCTCCTCAG
